# Supplementary material
Source: publisher figshare collection journal article supplement (https://gsapubs.figshare.com/articles/dataset/_/20394384)
Supplement: Supplementary file 1 [file 1]

Swenton, V.M., Streck, M.J., Miggins, D.P., and McIntosh, W.C., 2022, Filling critical gaps in the space-time record of high lava plains and co-Columbia River Basalt rhyolite volcanism: GSA Bulletin, <https://doi.org/10.1130/B36346.1>.

## Supplemental Material

**Supplemental Material A.** Referenced Ages and Sample Locations; (A.1) Compilation of rhyolite ages from this study and previous studies and additional age probability histograms (A.2) Compilation of basalt ages from previous studies (A.3) Compilation map from this study with all ages and sample locations (A.4) Coordinates for samples collected in this study.

**Supplemental Material B.** Sources of Pre-existing Geochemical Data; Data referenced in this study, shown in Figure 2.

**Supplemental Material C.**  $^{40}\text{Ar}/^{39}\text{Ar}$  Ideograms and Plateaus; All primary age plots for samples dated in this study.

**Supplemental Material D.** Detailed  $^{40}\text{Ar}/^{39}\text{Ar}$  Analysis Sample Preparation Procedures and Analytical Methods; Detailed sample preparation and analytical methods for all samples analyzed at Oregon State University and the New Mexico Institute of Technology.

**Supplemental Material E.** Full argon data files for  $^{40}\text{Ar}/^{39}\text{Ar}$  of feldspar and groundmass conducted at Oregon State University.

**Supplemental Material F.** Full argon data files for  $^{40}\text{Ar}/^{39}\text{Ar}$  of biotite conducted at Oregon State University.

## REFERENCES CITED (Tables)

Benson, T.R., and Mahood, G.A., 2016, Geology of the Mid-Miocene Rooster Comb Caldera and Lake Owyhee Volcanic Field, eastern Oregon: Silicic volcanism associated with Grande Ronde flood basalt: Journal of Volcanology and Geothermal Research, v. 309, p. 96–117, <https://doi.org/10.1016/j.jvolgeores.2015.11.011>.

Black, C.C., 2021, Rhyolite Stratigraphy Along Succor Creek: Insights into the Eruptive History of the Three Fingers and Mahogany Mountain Volcanic Field [MS Thesis]: Portland, Portland State University, 168 p., <https://doi.org/10.15760/etd.7670>.

Bonnichsen, B., McCurry, M., and Godchaux, M.M., 2004, Miocene Snake River Plain rhyolites of the Owyhee Front, Owyhee County, Idaho in Haller, K.M., and S.H., Wood, eds., Geological Field Trips in Southern Idaho, Eastern Oregon, and Northern Nevada: Open File Report 2004-1222, p. 203–228.

Camp, V.E., Ross, M.E., and Hanson, W.E., 2003, Genesis of flood basalts and Basin and Range volcanic rocks from Steens Mountain to the Malheur River Gorge, Oregon: Bulletin of the Geological Society of America, v. 115, p. 105–128, <https://doi.org/10.1130/0016->

[7606\(2003\)115<0105:GOFBAB>2.0.CO;2.](#)

Dvorak, C.L., 2021, Distribution and characterization of rhyolites of the Strawberry Mountain Volcanics – Evolution of a major rhyolite field associated with Columbia River Basalt Group magmatism, eastern Oregon, USA [M.S. thesis]: Portland, Portland State University, 195 p., <https://doi.org/10.15760/etd.7726>.

Fiebelkorn, R.B., Walker, G.W., MacLeod, N.S., McKee, W.H., and Smith, J.G., 1983, Index to K-Ar determinations for the state of Oregon: Isochron-West, v. 37, p. 4–60.

Ford, M.T., Grunder, A.L., and Duncan, R.A., 2013, Bimodal volcanism of the High Lava Plains and Northwestern Basin and Range of Oregon: Distribution and tectonic implications of age-progressive rhyolites: *Geochemistry Geophysics Geosystems*, v. 14, p. 2836–2857, <https://doi.org/10.1002/ggge.20175>.

Hess, E.N., 2014, Strontium, lead, and oxygen isotopic signatures of mid-Miocene silicic volcanism in eastern Oregon [M.S. thesis]: Portland, Portland State University, 102 p., <https://doi.org/10.15760/etd.2077>.

Jackson, R.A., 2021, New perspectives on prolific and voluminous rhyolite volcanism of the Mahogany Mountain—Three Fingers Rhyolite Field, eastern Oregon [MS Thesis]: Portland, Portland State University, 173 p., <https://doi.org/10.15760/etd.7641>.

Johnson, J.A., and Grunder, A.L., 2000, The making of intermediate composition magma in a bimodal suite: Duck Butte Eruptive Center, Oregon, USA: *Journal of Volcanology and Geothermal Research*, v. 95, p. 175–195, [https://doi.org/10.1016/S0377-0273\(99\)00125-0](https://doi.org/10.1016/S0377-0273(99)00125-0).

Jordan, B.T., Grunder, A.L., Duncan, R.A., and Deino, A.L., 2004, Geochronology of age-progressive volcanism of the Oregon High Lava Plains: Implications for the plume interpretation of Yellowstone: *Journal of Geophysical Research. Solid Earth*, v. 109, p. 1–19, <https://doi.org/10.1029/2003JB002776>.

Large, A.M., 2016, Silicic volcanism at the northern and western extent of the Columbia River Basalt rhyolite flare-up: Rhyolites of Buchanan volcanic complex and Dooley Mountain volcanic complex, Oregon [M.S. thesis]: Portland, Portland State University, 190 p., <https://doi.org/10.15760/etd.3118>.

Marcy, P.I., 2013. Revisiting volcanology and composition of rhyolites and associated REE rich mafic clasts of the Three Fingers Caldera, SE Oregon [MS Thesis]: Portland, Portland State University, 213 p., <https://doi.org/10.15760/etd.1542>.

McIntosh, W.C., Sutter, J.F., Chapin, C.E., and Kedzie, L.L., 1990, High-precision  $^{40}\text{Ar}/^{39}\text{Ar}$  sanidine geochronology of ignimbrites in the Mogollon-Datil volcanic field, southwestern New Mexico: *Bulletin of Volcanology*, v. 52, p. 584–601, <https://doi.org/10.1007/BF00301210>.

Robinson, S.W., and Trimble, D.A., 1983, United States Geological Survey, Menlo Park, California, radiocarbon measurements III: *Radiocarbon*, v. 25, p. 143–151, <https://doi.org/10.1017/S0033822200005336>.

Sales, H.J., 2018, The Wildcat Creek Tuff, eastern Oregon: Co-eruption of crystal-poor rhyolite

- and Fe-rich andesite with implication for mafic underpinnings to voluminous A-type rhyolites [M.S. thesis]: Portland, Portland State University, 151 p., <https://doi.org/10.15760/etd.6245>.
- Sanville, H.J., 2015, The Hampton Tuff, High Lava Plains, Oregon: Implications for Westward Migrating Silicic Volcanism [M.S. thesis]: Corvallis, Oregon, Oregon State University, 143 p.
- Scarberry, K.C., Meigs, A.J., and Grunder, A.L., 2010, Faulting in a propagating continental rift: Insight from the late Miocene structural development of the Abert Rim fault, southern Oregon, USA: *Tectonophysics*, v. 488, p. 71–86, <https://doi.org/10.1016/j.tecto.2009.09.025>.
- Streck, M.J., 2014, Evaluation of crystal mush extraction models to explain crystal-poor rhyolites: *Journal of Volcanology and Geothermal Research*, v. 284, p. 79–94, <https://doi.org/10.1016/j.jvolgeores.2014.07.005>.
- Streck, M.J., and Grunder, A.L., 1995, Crystallization and welding variations in a widespread ignimbrite sheet; the Rattlesnake Tuff, eastern Oregon, USA: *Bulletin of Volcanology*, v. 57, p. 151–169, <https://doi.org/10.1007/BF00265035>.
- Streck, M.J., and Grunder, A.L., 1999, Enrichment of basalt and mixing of dacite in the rootzone of a large rhyolite chamber: inclusions and pumices from the Rattlesnake Tuff, Oregon: *Contributions to Mineralogy and Petrology*, v. 136, p. 193–212, <https://doi.org/10.1007/s004100050532>.
- Streck, M.J., Ferns, M.L., and McIntosh, W., 2015, Large, persistent rhyolitic magma reservoirs above Columbia River Basalt storage sites: The Dinner Creek Tuff eruptive center, eastern Oregon: *Geosphere*, v. 11, p. 226–235, <https://doi.org/10.1130/GES01086.1>.
- Streck, M.J., McIntosh, W.C., and Ferns, M.L., 2017, Columbia River rhyolites: Age-distribution patterns and their implications for arrival, location, and dispersion of flood basalt magmas in the crust: *Geological Society of America Abstracts with Programs*, v. 49, no. 6, <https://doi.org/10.1130/abs/2017AM-302368>.
- Webb, B.M., Streck, M.J., McIntosh, W.C., and Ferns, M.L., 2018, The Littlefield Rhyolite and associated mafic lavas: Bimodal volcanism of the Columbia River magmatic province, with constraints on age and storage sites of Grande Ronde Basalt magmas: *Geosphere*, v. 15, p. 60–84, <https://doi.org/10.1130/GES01695.1>.

## Appendix D. Detailed $^{40}\text{Ar}/^{39}\text{Ar}$ Sample Preparation Procedures and Analytical Methods

Preparation began by crushing rock samples into sand and gravel using PSU's Braun Chipmunk jaw crusher. Some samples were run through the crusher a second or third time to generate more sediment. See Table D.1 for information regarding the institute in which the age was determined and the year that it was analyzed.

TABLE D.1. SUMMARY OF WHEN AND WHERE  $^{40}\text{Ar}/^{39}\text{Ar}$  AGES FROM THIS STUDY WERE DETERMINED

| Sample ID | Unit                       | Age type* | Institute | Year analyzed |
|-----------|----------------------------|-----------|-----------|---------------|
| EJ-12-19  | South of Drewsey           | SCTF      | OSU       | 2020          |
| EJ-12-21B | Griffin Creek              | SCTF      | OSU       | 2020          |
| MS-13-09  | McEwen Butte               | SCTF      | NMT       | 2018          |
| MS-13-10  | Visher Creek               | SCTF      | OSU       | 2020          |
| MS-17-DAM | Dam Rhyolite               | SCTF      | OSU       | 2020          |
| VS17-001  | Stockade Mountain          | SCTF      | NMT       | 2018          |
| VS17-003  | Star Mountain              | SCTF      | NMT       | 2018          |
| VS17-020  | Star Mountain              | SCTF      | OSU       | 2020          |
| VS17-034  | Stockade Mountain, south   | SCTF      | OSU       | 2018          |
| VS17-035  | Mustang Butte              | IH        | OSU       | 2020          |
| VS17-043  | Saddle Butte               | SCTF      | OSU       | 2018          |
| VS17-045  | Iron Point                 | SCTF      | OSU       | 2018          |
| VS17-046B | Dome N of Iron Point       | SCTF      | OSU       | 2018          |
| VS17-054  | Unidentified Flow #1       | SCTF      | OSU       | 2018          |
| VS17-056  | South Fork                 | SCTF      | OSU       | 2018          |
| VS17-065  | Sacramento Butte           | SCTF      | OSU       | 2018          |
| VS19-068  | Birch Creek                | SCTF      | OSU       | 2020          |
| VS19-079  | Birch Creek                | SCTF      | OSU       | 2020          |
| VS19-080  | Dome E of South Fork       | IH        | OSU       | 2020          |
| VS19-085  | Circle Bar                 | SCTF      | OSU       | 2020          |
| VS19-089  | Circle Bar                 | SCTF      | OSU       | 2020          |
| VS19-093  | Unidentified Flow #2       | SCTF      | OSU       | 2020          |
| VS19-098  | Stockade Mountain, proper  | SCTF      | OSU       | 2020          |
| VS19-101  | Trd N of Stockade Mountain | SCTF      | OSU       | 2020          |
| VS19-104  | Trd N of Stockade Mountain | SCTF      | OSU       | 2020          |
| VS19-106  | Black Butte                | SCTF      | OSU       | 2020          |
| VS19-109  | North of Drewsey           | SCTF      | OSU       | 2020          |
| VS19-116  | Dry Creek                  | SCTF      | OSU       | 2020          |
| VS20-125A | Wagontire Mountain         | SCTF      | OSU       | 2020          |

\*IH = Incremental heating; SCTF = Single crystal total fusion.

### Sample preparation for those dated at New Mexico Bureau of Geology and Mineral Resources, Socorro, NM

At PSU, rock samples were sieved, and the largest sieve-fraction containing whole sanidine crystals was chosen to pick sanidine crystals from by hand. Commonly, this sieve-

fraction was bracketed by the 0.420 mm (#40) and 0.250 mm (#60) sieve sizes. Sanidine crystals with little to no attached matrix material or inclusions were chosen when hand-picking.

Samples were irradiated in a nuclear reactor with sanidine standards from Kuiper et al. (2008) Fish Canyon Tuff ( $28.201 \pm 0.023$  Ma,  $1\sigma$ ) flux monitor in order to make J-factor corrections. Single sanidine crystals were analyzed by laser step-heating at NM Tech using techniques described in McIntosh et al. (1990). Individual crystals from each sample were subject to at least two heating steps, A and B, and the B steps were used to determine the mean age in a relative probability plot. In rare cases two-three additional steps were conducted on individual crystals. Atmospheric argon ( $^{40}\text{Ar}$  and  $^{36}\text{Ar}$ ) inheritance was taken into account and excluded (McIntosh et al., 1990). Individual crystals are bombarded with multiple laser shots and the cumulative  $\%^{39}\text{Ar}$  released is measured. When plotted as an ideogram, laser shots that continuously release the same  $\%^{39}\text{Ar}$  will be considered when determining the ages. See The New Mexico Geochronology Research Lab webpage for details on the [Argon method](#) and the [software used](#).

### **Sample preparation for those dated at Oregon State University, Corvallis, OR**

Crushed rock samples were prepared further at OSU. Crushed material was sieved further to various fractions between 840–125 nm, targeting the fraction with the largest and cleanest sanidine crystals, avoiding altered feldspar crystals or crystals with melt inclusions. Sieved and washed fractions were run through a Frantz Isodynamic Magnetic Separator to concentrate the sanidine in the nonmagnetic fraction (2.0Å nonmagnetic). The nonmagnetic fraction was leached in mild (15%) hydrofluoric acid (HF) for up to 6 minutes to remove any adhering glass or groundmass. A few crystals from each separate were submerged in wintergreen oil (Methyl Salicilate) determined the presence and estimated abundance of plagioclase feldspar, potassium feldspar, and quartz, glass, and other crystals. If plagioclase and quartz needed to be removed from an individual HF treated separate, the material was then put through a heavy liquid separation using Lithium Heteropolytungstate (LST) using a density of 2.582 to float the K-feldspars and sink the plagioclase and quartz crystals. The sink and float separates were subsequently rinsed in cold water 10 to 15 times and then 3 times with Milli-Q (triple distilled) water to ensure all LST was removed from each fraction and then were dried overnight. The largest, least altered feldspar grains were then hand-picked for analysis to a purity of >99.9%.

Groundmass fractions were leached in five separate acid and water solutions in an ultrasonic bath, each for approximately one hour. Solutions, in order, included 1M hydrochloric acid, 6M hydrochloric acid, 1M nitric acid, 3M nitric acid, and milli-Q water (as described by Koppers et al. 2000). Samples were then rinsed three times with milli-Q water and dried overnight at 55°C.

### **OSU Argon Geochronology Laboratory $^{40}\text{Ar}/^{39}\text{Ar}$ Methods:**

$^{40}\text{Ar}/^{39}\text{Ar}$  ages (Table 1) were obtained using incremental heating methods and analysed using a ThermoFisher Scientific ARGUS-VI mass spectrometer. Data collection was obtained using internal lab software ArArExperiments version 4.6.0.7. Compiled data were reduced using internal lab software ArArCalc software (v. 2.7.0). The samples were irradiated for 6 hours (Irradiations 21-OSU-05 in the CLICIT position in the Oregon State University's TRIGA nuclear reactor. Sample were irradiated with neutron flux monitor Fish Canyon Tuff sanidine (FCT-2-NM sanidine) with an age of  $28.201 \pm 0.023$  Ma,  $1\sigma$  flux monitor (Kuiper et al. 2008). Individual J-values for all samples were calculated by polynomial extrapolation of the measured flux gradient against irradiation height and typically give 0.06-0.12% uncertainties ( $1\sigma$ ).  $^{40}\text{Ar}/^{39}\text{Ar}$  incremental heating age determinations were performed on a multi-collector ARGUS-VI mass spectrometer at Oregon State University that currently contains 5 Faraday collectors fitted with two  $10^{12}$  Ohm resistors: for masses  $^{41}\text{Ar}$  and  $^{40}\text{Ar}$  and three  $10^{13}$  Ohm resistors: for argon masses  $^{39}\text{Ar}$ ,  $^{38}\text{Ar}$ , and  $^{37}\text{Ar}$  and 1 ion-counting CuBe electron multiplier (located in a position next to the lowest mass Faraday collector). This allows us to measure simultaneously all argon isotopes, with mass 36 on the multiplier and masses 37 through 40 on the four adjacent Faradays. This configuration provides the advantages of running in a full multi-collector mode while measuring the lowest peak (on mass 36) on the highly sensitive electron multiplier (which has an extremely low dark-noise and a very high peak/noise ratio). Irradiated samples were loaded into Cu or stainless steel-planchettes in an ultra-high vacuum sample chamber and incrementally heated using a scanning Synrad Firestar 20Watt defocused 30 W  $\text{CO}_2$  laser beam in pre-set patterns across the sample, in order to release the argon evenly. Each heating step is 50 seconds. After heating, reactive gases were cleaned up using four SAES Zr-Al AP10 getters between 3 and 6 minutes; two operated at 450°C and two operated at room temperature (21°C). All ages were calculated using the corrected Steiger and Jäger (1977) decay constant of  $5.530 \pm 0.097 \times 10^{-10}$  1/yr ( $2\sigma$ ) as reported by Min et al. (2000). For all other constants used in the age calculations we

refer to Table 2 in Koppers et al. (2003). Ideogram ages were calculated using ArArCalc software and are weighted mean ages with uncertainties at the 2-sigma level. Incremental heating plateau ages and isochron ages were calculated as weighted means with  $1/\sigma^2$  as weighting factor (Taylor 1997) and as YORK2 least-square fits with correlated errors (York 1969) using the ArArCALC v2.6.2 software from Koppers (2002) available from the <http://earthref.org/ArArCALC/> website.

Argon isotopic results were corrected for system blanks, radioactive decay, mass discrimination, reactor-induced interference reactions and atmospheric argon contamination. Decay constants reported by Min et al. (2000) are utilized for age calculation. Isotope interference corrections as determined using the ARGUS VI are:  $(^{36}\text{Ar}/^{37}\text{Ar})_{\text{Ca}} = 0.0002703 \pm 0.0000005$ ;  $(^{39}\text{Ar}/^{37}\text{Ar})_{\text{Ca}} = 0.0006425 \pm 0.0000059$ ;  $(^{40}\text{Ar}/^{39}\text{Ar})_{\text{K}} = 0.000607 \pm 0.000059$ ;  $(^{38}\text{Ar}/^{39}\text{Ar})_{\text{K}} = 0.012077 \pm 0.000011$ . Ages for each sample were calculated assuming an atmospheric  $^{40}\text{Ar}/^{36}\text{Ar}$  ratio of  $298.56 \pm 0.113$  (Lee et al. 2006). Data reduction and age calculations were processed using Ar-ArCalc 2.7.0 (modified from Koppers, 2002). Plateau ages are defined as including >50% of the total  $^{39}\text{Ar}$  released with at least three consecutive steps; mini-plateau ages are defined by < 50% of the total  $^{39}\text{Ar}$  released and for a few samples (Schaen et al. 2020), the inverse isochron age was the best estimate of the age of the sample and the  $^{40}\text{Ar}/^{39}\text{Ar}$  ratio for each step is in agreement with the mean at the 95% confidence level.

## References

Koppers, A.A.P., Staudigel, H., and Wijbrans, J.R., 2000, Dating crystalline groundmass separates of altered Cretaceous seamount basalts by the  $^{40}\text{Ar}/^{39}\text{Ar}$  incremental heating technique, *Chemical Geology*, vol. 166, 139-158.

Koppers, A. A. P., ArArCALC—Software for  $^{40}\text{Ar}/^{39}\text{Ar}$  age calculations, *Comput. Geosci.*, 28, 605–619, 2002. (Available at <http://earthref.org/tools/ararcalc.htm>.)

Koppers, A., H. Staudigel, J. R. Wijbrans, and M. Pringle, 2003, Short-lived and discontinuous intraplate volcanism in the South Pacific: Hot spots or extensional volcanism?, *Geochem. Geophys. Geosyst.*, 4, 10 doi:10.1029/2003GC000533.

K. F. Kuiper, A. Deino, F. J. Hilgen, W. Krijgsman, P. R. Renne, J. R. Wijbrans, 2008, Synchronizing Rock Clocks of Earth History, *Science* 320, 500 (2008); DOI: 10.1126/science.1154339

Lee, J.-Y., Marti, K., Severinghaus, J. P., Kawamura, K., Yoo, H.-S., Lee, J. B., & Kim, J. S. (2006). A redetermination of the isotopic abundances of atmospheric Ar. *Geochimica et Cosmochimica Acta*, 70(17), 4507–4512. <https://doi.org/10.1016/j.gca.2006.06.1563>

Min, K., R. Mundil, P. R. Renne, and K. R. Ludwig, A test for systematic errors in  $^{40}\text{Ar}/^{39}\text{Ar}$  geochronology through comparison with U/Pb analysis of a 1.1-Ga rhyolite, *Geochim. Cosmochim. Acta*, 64, 73–98, 2000.

Schaen, A.J., Jicha, B.R., Hodges, K.V., Vermeesch, P., Stelten, M.E., Mercer, C.M, Phillips, D., Rivera, T.A., Jourdan, F., Matchan, E.L, Hemming, S.R., Morgan, L.E., Kelley, S.P., Cassata, W.S., Heizler, M.T., Vasconcelos, P.M., Benowitz, J.A., Koppers, A.P., Mark, D.F., Niespolo, E.M., Sprain, C.J., Hames, W.E., Kuiper, K.F., Turrin, B.D., Renne, P.R., Ross, J., Nomade, S., Guillou, H., Webb, L.E., Cohen, B.A., Calvert, A.T., , Joyce, N., Ganerod, M., Wijbrans, J., Ishizuka, O., He, H., Ramirez, A, Pfander, J.A., Martinez, M.L., Qiu, H, and Singer, B.S., 2020, Interpreting and reporting  $^{40}\text{Ar}/^{39}\text{Ar}$  geochronologic data, Geological Society of America Bulletin, <https://doi.org/10.1130/B35560.1>

Steiger, R. H., and E. Ja"ger, Subcommittee on geochronology: Convention on the use of decay constant in geo- and cosmochronology, *Earth Planet. Sci. Lett.*, 36, 359–362, 1977.

Taylor, J. R., *An Introduction to Error Analysis: The Study of Uncertainties in Physical Measurements*, 327 pp., Univ. Sci. Books, Mill Valley, Calif., 1997.

York, D., Least squares fitting of a straight line with correlated errors, *Earth Planet. Sci. Lett.*, 5, 320–324, 1969.



| Relative Abundances |        |   | 36Ar<br>[fA] | %1σ   | 37Ar<br>[fA] | %1σ      | 38Ar<br>[fA] | %1σ   | 39Ar<br>[fA] | %1σ   | 40Ar<br>[fA] | %1σ   | 40(r)/39(k) ± 2σ | Age ± 2σ<br>(Ma) | 40Ar(r)<br>(%) | 39Ar(k)<br>(%) | K/Ca ± 2σ    |
|---------------------|--------|---|--------------|-------|--------------|----------|--------------|-------|--------------|-------|--------------|-------|------------------|------------------|----------------|----------------|--------------|
| 20F24130            | 17.0 % | ✓ | 0.4611932    | 0.273 | 1.2689543    | 11.313   | 3.2593437    | 0.314 | 262.43720    | 0.043 | 818.4563     | 0.006 | 2.59379 ±0.00382 | 7.54 ±0.01       | 83.17          | 56.65          | 89 ±20       |
| 20F24132            | 17.0 % |   | 0.0134721    | 2.663 | 1.5969984    | 7.963    | 1.8087743    | 0.493 | 149.31668    | 0.044 | 596.8303     | 0.006 | 3.97042 ±0.00379 | 11.53 ±0.01      | 99.33          | 32.23          | 40 ±6        |
| 20F24459            | 17.0 % | ✓ | 0.0328186    | 1.137 | 0.0021988    | 6803.480 | 0.3036960    | 2.829 | 24.87826     | 0.060 | 74.2711      | 0.035 | 2.59092 ±0.00979 | 7.53 ±0.03       | 86.79          | 5.37           | 4865 ±662010 |
| 20F24461            | 17.0 % |   | 0.0066178    | 3.935 | 0.0608345    | 218.158  | 0.1588733    | 5.852 | 13.95966     | 0.079 | 57.2829      | 0.049 | 3.96167 ±0.01350 | 11.51 ±0.04      | 96.54          | 3.01           | 99 ±431      |
| 20F24463            | 17.0 % | ✓ | 0.0034404    | 7.738 | 0.0861276    | 165.152  | 0.1510478    | 6.019 | 12.65949     | 0.089 | 33.9664      | 0.066 | 2.60077 ±0.01397 | 7.56 ±0.04       | 96.93          | 2.73           | 63 ±209      |
| Σ                   |        |   | 0.5175421    | 0.273 | 2.8384607    | 10.973   | 5.6817351    | 0.364 | 463.25128    | 0.029 | 1580.8070    | 0.005 |                  |                  |                |                |              |

| Information on Analysis and Constants Used in Calculations |  |
|------------------------------------------------------------|--|
| Project = SWENTON (20-01)                                  |  |
| Stack = EJ-12-19 (N=2)                                     |  |
| Material = Sanidine                                        |  |
| Location = Rhyolite Dome                                   |  |
| Region = Eastern Oregon                                    |  |
| Analyst = Dan Miggins                                      |  |
| Irradiation = 20-OSU-01 (1C44-20)                          |  |
| Position = X: 0   Y: 0   Z/H: 53.43119 mm                  |  |
| FCT-NM Age = 28.201 ±0.023 Ma                              |  |
| FCT-NM Reference = Kuiper et al (2008)                     |  |
| FCT-NM 40Ar/39Ar Ratio = 9.75262 ±0.01482                  |  |
| FCT-NM J-value = 0.00159193 ±0.00000242                    |  |
| Air Shot 40Ar/36Ar = 299.0300 ±0.4007                      |  |
| Air Shot MDF = 0.99960655 ±0.00042394 (LIN)                |  |
| Experiment Type = Total Fusion                             |  |
| Extraction Method = Single Crystal Laser Heating           |  |
| Heating = 62 sec                                           |  |
| Isolation = 1.62 min                                       |  |
| Instrument = ARGUS-VI-F                                    |  |
| Preferred Age = Ideogram Age                               |  |
| Age Classification = Eruption Age                          |  |
| IGSN = Undefined                                           |  |
| Rock Class = Undefined                                     |  |
| Lithology = Undefined                                      |  |
| Lat-Lon = Undefined - Undefined                            |  |
| Age Equations = Min et al. (2000)                          |  |
| Negative Intensities = Allowed                             |  |
| Collector Calibrations = 40Ar 39Ar 38Ar 37Ar 36Ar          |  |
| Decay 40K = 5.463 ±0.107 E-10 1/a                          |  |
| Decay 39Ar = 2.940 ±0.016 E-07 1/h                         |  |
| Decay 37Ar = 8.230 ±0.012 E-04 1/h                         |  |
| Decay 36Cl = 2.257 ±0.015 E-06 1/a                         |  |
| Decay 40K(EC,β <sup>+</sup> ) = 0.580 ±0.014 E-10 1/a      |  |
| Decay 40K(β <sup>-</sup> ) = 4.884 ±0.099 E-10 1/a         |  |
| Atmospheric 40/36(a) = 298.56 ±0.31                        |  |
| Atmospheric 38/36(a) = 0.1885 ±0.0003                      |  |
| Production 39/37(ca) = 0.0006425 ±0.0000059                |  |
| Production 38/37(ca) = 0.0001800 ±0.0000173                |  |
| Production 36/37(ca) = 0.0002703 ±0.0000005                |  |
| Production 40/39(k) = 0.000607 ±0.000059                   |  |
| Production 38/39(k) = 0.012077 ±0.000011                   |  |
| Production 36/38(cl) = 262.80 ±1.71                        |  |
| Scaling Ratio K/Ca = 0.430                                 |  |
| Abundance Ratio 40K/K = 1.1700 ±0.0100 E-04                |  |
| Atomic Weight K = 39.0983 ±0.0001 g                        |  |

| Results          | 40(a)/36(a) ± 2σ       | 40(r)/39(k) ± 2σ           | Age ± 2σ<br>(Ma)     | MSWD        | 39Ar(k)<br>(%,n) | K/Ca ± 2σ |
|------------------|------------------------|----------------------------|----------------------|-------------|------------------|-----------|
| Age Plateau      |                        | 2.59386 ±0.00345<br>±0.13% | 7.54 ±0.02<br>±0.33% | 0.67<br>51% | 64.75<br>3       | 88 ±21    |
|                  |                        |                            |                      |             |                  |           |
|                  |                        |                            |                      |             |                  |           |
| Total Fusion Age |                        | 3.07877 ±0.00263<br>±0.09% | 8.95 ±0.03<br>±0.32% |             | 5                | 70 ±15    |
|                  |                        |                            |                      |             |                  |           |
|                  |                        |                            |                      |             |                  |           |
| Normal Isochron  | 293.24 ±9.35<br>±3.19% | 2.60262 ±0.01550<br>±0.60% | 7.57 ±0.05<br>±0.67% | 1.05<br>30% | 64.75<br>3       |           |
|                  |                        |                            |                      |             |                  |           |
|                  |                        |                            |                      |             |                  |           |
| Inverse Isochron | 295.24 ±9.19<br>±3.11% | 2.59923 ±0.01525<br>±0.59% | 7.56 ±0.05<br>±0.66% | 0.83<br>36% | 64.75<br>3       |           |
|                  |                        |                            |                      |             |                  |           |
|                  |                        |                            |                      |             |                  |           |

| Incremental Heating |        |   | 36Ar(a)<br>[fA] | 37Ar(ca)<br>[fA] | 38Ar(cl)<br>[fA] | 39Ar(k)<br>[fA] | 40Ar(r)<br>[fA] | Age ± 2σ<br>(Ma) | 40Ar(r)<br>(%) | 39Ar(k)<br>(%) | K/Ca ± 2σ     |
|---------------------|--------|---|-----------------|------------------|------------------|-----------------|-----------------|------------------|----------------|----------------|---------------|
| 20F24130            | 17.0 % | ✓ | 0.4608495       | 1.2689543        | 0.0028009        | 262.43638       | 680.7058        | 7.54 ± 0.01      | 83.17          | 56.65          | 89 ± 20       |
| 20F24132            | 17.0 % |   | 0.0130398       | 1.5969984        | 0.0027437        | 149.31565       | 592.8465        | 11.53 ± 0.01     | 99.33          | 32.23          | 40 ± 6        |
| 20F24459            | 17.0 % | ✓ | 0.0328192       | 0.0021988        | 0.0000000        | 24.87826        | 64.4575         | 7.53 ± 0.03      | 86.79          | 5.37           | 4865 ± 662010 |
| 20F24461            | 17.0 % |   | 0.0066014       | 0.0608345        | 0.0000000        | 13.95962        | 55.3035         | 11.51 ± 0.04     | 96.54          | 3.01           | 99 ± 431      |
| 20F24463            | 17.0 % | ✓ | 0.0034637       | 0.0861276        | 0.0000000        | 12.65955        | 32.9246         | 7.56 ± 0.04      | 96.93          | 2.73           | 63 ± 209      |
| Σ                   |        |   | 0.5167736       | 2.8384607        | 0.0055446        | 463.24945       | 1426.2379       |                  |                |                |               |

| Information on Analysis                                                                                                                                                                                                                                      | Results          | 40(r)/39(k) ± 2σ          | Age ± 2σ<br>(Ma)                                                             | MSWD                          | 39Ar(k)<br>(%,n)                                         | K/Ca ± 2σ |
|--------------------------------------------------------------------------------------------------------------------------------------------------------------------------------------------------------------------------------------------------------------|------------------|---------------------------|------------------------------------------------------------------------------|-------------------------------|----------------------------------------------------------|-----------|
| Project = SWENTON (20-01)<br>Stack = EJ-12-19 (N=2)<br>Material = Sanidine<br>Location = Rhyolite Dome<br>Region = Eastern Oregon<br>Analyst = Dan Miggins<br>Irradiation = 20-OSU-01 (1C44-20)<br>J = 0.00159193 ± 0.00000242<br>FCT-NM = 28.201 ± 0.023 Ma | Age Plateau      | 2.59386 ± 0.00345 ± 0.13% | 7.54 ± 0.02 ± 0.33%<br>Full External Error ± 0.39<br>Analytical Error ± 0.01 | 0.67<br>51%<br>3.00<br>1.0000 | 64.75<br>3<br>2σ Confidence Limit<br>Error Magnification | 88 ± 21   |
|                                                                                                                                                                                                                                                              | Total Fusion Age | 3.07877 ± 0.00263 ± 0.09% | 8.95 ± 0.03 ± 0.32%<br>Full External Error ± 0.47<br>Analytical Error ± 0.01 |                               | 5                                                        | 70 ± 15   |

| Normal Isochron |        |   | 39(k)/36(a) ± 2σ | 40(a+r)/36(a) ± 2σ | r.i.   |
|-----------------|--------|---|------------------|--------------------|--------|
| 20F24130        | 17.0 % | ✓ | 569.46 ±3.15     | 1775.63 ±9.71      | 0.9875 |
| 20F24132        | 17.0 % |   | 11450.80 ±633.16 | 45763.11 ±2530.13  | 0.9999 |
| 20F24459        | 17.0 % | ✓ | 758.04 ±17.36    | 2262.58 ±51.77     | 0.9982 |
| 20F24461        | 17.0 % |   | 2114.65 ±168.45  | 8676.11 ±691.03    | 0.9997 |
| 20F24463        | 17.0 % | ✓ | 3654.91 ±567.71  | 9804.16 ±1522.82   | 0.9999 |

| Results         | 40(a)/36(a) ± 2σ                                                    | 40(r)/39(k) ± 2σ        | Age ± 2σ (Ma)                                                            | MSWD                                   |
|-----------------|---------------------------------------------------------------------|-------------------------|--------------------------------------------------------------------------|----------------------------------------|
| Normal Isochron | 293.24 ±9.35 ±3.19%                                                 | 2.60262 ±0.01550 ±0.60% | 7.57 ±0.05 ±0.67%<br>Full External Error ±0.40<br>Analytical Error ±0.04 | 1.05<br>30%                            |
| Statistics      | 2σ Confidence Limit<br>Error Magnification<br>Number of Data Points | 3.83<br>1.0267<br>3     | Convergence<br>Number of Iterations<br>Calculated Line                   | 0.000004487203<br>1<br>Weighted York-2 |

| Inverse Isochron |        |   | 39(k)/40(a+r) ± 2σ   | 36(a)/40(a+r) ± 2σ     | r.i.   |
|------------------|--------|---|----------------------|------------------------|--------|
| 20F24130         | 17.0 % | ✓ | 0.3207104 ±0.0002796 | 0.00056318 ±0.00000308 | 0.0030 |
| 20F24132         | 17.0 % |   | 0.2502191 ±0.0002209 | 0.00002185 ±0.00000121 | 0.0003 |
| 20F24459         | 17.0 % | ✓ | 0.3350335 ±0.0004657 | 0.00044197 ±0.00001011 | 0.0156 |
| 20F24461         | 17.0 % |   | 0.2437323 ±0.0004548 | 0.00011526 ±0.00000918 | 0.0065 |
| 20F24463         | 17.0 % | ✓ | 0.3727921 ±0.0008272 | 0.00010200 ±0.00001584 | 0.0051 |

| Results          | 40(a)/36(a) ± 2σ                                                                        | 40(r)/39(k) ± 2σ             | Age ± 2σ (Ma)                                                            | MSWD                                 |
|------------------|-----------------------------------------------------------------------------------------|------------------------------|--------------------------------------------------------------------------|--------------------------------------|
| Inverse Isochron | 295.24 ±9.19 ±3.11%                                                                     | 2.59923 ±0.01525 ±0.59%      | 7.56 ±0.05 ±0.66%<br>Full External Error ±0.40<br>Analytical Error ±0.04 | 0.83<br>36%                          |
|                  |                                                                                         |                              |                                                                          |                                      |
| Statistics       | 2σ Confidence Limit<br>Error Magnification<br>Number of Data Points<br>Spreading Factor | 3.83<br>1.0000<br>3<br>13.5% | Convergence<br>Number of Iterations<br>Calculated Line                   | 0.0000034435<br>3<br>Weighted York-2 |

| Degassing Patterns |        |   | 36Ar(a)<br>[fA] | %1σ  | 36Ar(c)<br>[fA] | %1σ  | 36Ar(ca)<br>[fA] | %1σ    | 36Ar(cl)<br>[fA] | %1σ    | 37Ar(ca)<br>[fA] | %1σ    | 38Ar(a)<br>[fA] | %1σ  | 38Ar(c)<br>[fA] | %1σ  | 38Ar(k)<br>[fA] | %1σ  | 38Ar(ca)<br>[fA] | %1σ    | 38Ar(cl)<br>[fA] | %1σ    | 39Ar(k)<br>[fA] | %1σ  | 39Ar(ca)<br>[fA] | %1σ    | 40Ar(r)<br>[fA] | %1σ  | 40Ar(a)<br>[fA] | %1σ  | 40Ar(c)<br>[fA] | %1σ  | 40Ar(k)<br>[fA] | %1σ  |
|--------------------|--------|---|-----------------|------|-----------------|------|------------------|--------|------------------|--------|------------------|--------|-----------------|------|-----------------|------|-----------------|------|------------------|--------|------------------|--------|-----------------|------|------------------|--------|-----------------|------|-----------------|------|-----------------|------|-----------------|------|
| 20F24130           | 17.0 % | ✓ | 0.4608495       | 0.27 | 0.0000000       | 0.00 | 0.0003430        | 11.31  | 0.0000006        | 461.20 | 1.2689543        | 11.31  | 0.0868701       | 0.32 | 0.0000000       | 0.00 | 3.1694442       | 0.10 | 0.0002284        | 14.86  | 0.0028009        | 461.20 | 262.43638       | 0.04 | 0.0008153        | 11.35  | 680.7058        | 0.06 | 137.59124       | 0.29 | 0.0000000       | 0.00 | 0.1592989       | 9.65 |
| 20F24132           | 17.0 % |   | 0.0130398       | 2.76 | 0.0000000       | 0.00 | 0.0004317        | 7.96   | 0.0000006        | 363.31 | 1.5969984        | 7.96   | 0.0024580       | 2.77 | 0.0000000       | 0.00 | 1.8032851       | 0.10 | 0.0002875        | 12.50  | 0.0027437        | 363.31 | 149.31565       | 0.04 | 0.0010261        | 8.02   | 592.8465        | 0.02 | 3.89315         | 2.77 | 0.0000000       | 0.00 | 0.0906346       | 9.65 |
| 20F24459           | 17.0 % | ✓ | 0.0328192       | 1.14 | 0.0000000       | 0.00 | 0.0000006        | #####  | 0.0000000        | 0.00   | 0.0021988        | #####  | 0.0061864       | 1.15 | 0.0000000       | 0.00 | 0.3004547       | 0.11 | 0.0000004        | #####  | 0.0000000        | 0.00   | 24.87826        | 0.06 | 0.0000014        | #####  | 64.4575         | 0.18 | 9.79850         | 1.15 | 0.0000000       | 0.00 | 0.0151011       | 9.65 |
| 20F24461           | 17.0 % |   | 0.0066014       | 3.98 | 0.0000000       | 0.00 | 0.0000164        | 218.16 | 0.0000000        | 0.00   | 0.0608345        | 218.16 | 0.0012444       | 3.99 | 0.0000000       | 0.00 | 0.1685903       | 0.12 | 0.0000110        | 218.37 | 0.0000000        | 0.00   | 13.95962        | 0.08 | 0.0000391        | 218.16 | 55.3035         | 0.15 | 1.97091         | 3.98 | 0.0000000       | 0.00 | 0.0084735       | 9.65 |
| 20F24463           | 17.0 % | ✓ | 0.0034637       | 7.77 | 0.0000000       | 0.00 | 0.0000233        | 165.15 | 0.0000000        | 0.00   | 0.0861276        | 165.15 | 0.0006529       | 7.77 | 0.0000000       | 0.00 | 0.1528893       | 0.13 | 0.0000155        | 165.43 | 0.0000000        | 0.00   | 12.65955        | 0.09 | 0.0000553        | 165.15 | 32.9246         | 0.25 | 1.03412         | 7.77 | 0.0000000       | 0.00 | 0.0076843       | 9.65 |
| Σ                  |        |   | 0.5167736       | 0.27 | 0.0000000       | 0.00 | 0.0007672        | 10.97  | 0.0000013        | 294.28 | 2.8384607        | 10.97  | 0.0974118       | 0.31 | 0.0000000       | 0.00 | 5.5946636       | 0.07 | 0.0005109        | 12.98  | 0.0055446        | 294.28 | 463.24945       | 0.03 | 0.0018237        | 10.99  | 1426.2379       | 0.03 | 154.28793       | 0.29 | 0.0000000       | 0.00 | 0.2811924       | 6.32 |
| Σ                  |        |   |                 |      |                 |      |                  |        | 0.5175421        | 0.27   | 2.8384607        | 10.97  |                 |      |                 |      |                 |      |                  |        | 5.6981310        | 0.29   |                 |      | 463.25128        | 0.03   |                 |      |                 |      |                 |      | 1580.8070       | 0.04 |

| Additional Parameters |        |   | 40Ar/39Ar | 1σ       | 37Ar/39Ar | 1σ       | 36Ar/39Ar | 1σ       | Time (days) | 37Ar (decay) | 39Ar (decay) | 40Ar (moles) |
|-----------------------|--------|---|-----------|----------|-----------|----------|-----------|----------|-------------|--------------|--------------|--------------|
| 20F24130              | 17.0 % | ✓ | 3.118675  | 0.001358 | 0.004835  | 0.000547 | 0.001757  | 0.000005 | 141.697     | 16.465344    | 1.00100119   | 2.897E-11    |
| 20F24132              | 17.0 % |   | 3.997077  | 0.001763 | 0.010695  | 0.000852 | 0.000090  | 0.000002 | 141.708     | 16.469184    | 1.00100128   | 2.113E-11    |
| 20F24459              | 17.0 % | ✓ | 2.985384  | 0.002074 | 0.000088  | 0.006013 | 0.001319  | 0.000015 | 144.182     | 17.293829    | 1.00101875   | 2.629E-12    |
| 20F24461              | 17.0 % |   | 4.103457  | 0.003828 | 0.004358  | 0.009507 | 0.000474  | 0.000019 | 144.194     | 17.297862    | 1.00101883   | 2.028E-12    |
| 20F24463              | 17.0 % | ✓ | 2.683079  | 0.002976 | 0.006803  | 0.011236 | 0.000272  | 0.000021 | 144.206     | 17.302134    | 1.00101892   | 1.202E-12    |

| Procedure<br>Blanks |        | 36Ar ± 1σ (SE)<br>[fA] | 37Ar ± 1σ (SE)<br>[fA] | 38Ar ± 1σ (SE)<br>[fA] | 39Ar ± 1σ (SE)<br>[fA] | 40Ar ± 1σ (SE)<br>[fA] |
|---------------------|--------|------------------------|------------------------|------------------------|------------------------|------------------------|
| 20F24130            | 17.0 % | 0.0058584 ±0.0001782   | 0.0131664 ±0.0064060   | 0.0083431 ±0.0069634   | 0.0062389 ±0.0068578   | 1.4278047 ±0.0157206   |
| 20F24132            | 17.0 % | 0.0059666 ±0.0001760   | 0.0164692 ±0.0053243   | 0.0055182 ±0.0064858   | 0.0355104 ±0.0069041   | 1.4542840 ±0.0152029   |
| 20F24459            | 17.0 % | 0.0045104 ±0.0001637   | 0.0092250 ±0.0063122   | 0.0016605 ±0.0057501   | 0.0093829 ±0.0056572   | 0.9709869 ±0.0161321   |
| 20F24461            | 17.0 % | 0.0046140 ±0.0001708   | 0.0096651 ±0.0052944   | 0.0037516 ±0.0064257   | 0.0276413 ±0.0060133   | 1.0930571 ±0.0195060   |
| 20F24463            | 17.0 % | 0.0043419 ±0.0001600   | 0.0147875 ±0.0059421   | 0.0049512 ±0.0067922   | 0.0040107 ±0.0059809   | 1.0273381 ±0.0141216   |

| Intercept Values |        | 36Ar ± 1σ (SE) [fA]  | r2     | Regression (type,n) | 37Ar ± 1σ (SE) [fA]  | r2     | Regression (type,n) | 38Ar ± 1σ (SE) [fA]  | r2     | Regression (type,n) | 39Ar ± 1σ (SE) [fA]  | r2     | Regression (type,n) | 40Ar ± 1σ (SE) [fA]  | r2     | Regression (type,n) |
|------------------|--------|----------------------|--------|---------------------|----------------------|--------|---------------------|----------------------|--------|---------------------|----------------------|--------|---------------------|----------------------|--------|---------------------|
| 20F24130         | 17.0 % | 0.4572808 ±0.0009495 | 0.9224 | EXP 150 of 150      | 0.0638109 ±0.0058902 | 0.0118 | EXP 148 of 150      | 3.2484363 ±0.0069457 | 0.9576 | EXP 150 of 150      | 262.077997 ±0.021024 | 0.9999 | EXP 150 of 150      | 819.884114 ±0.044124 | 1.0000 | EXP 150 of 150      |
| 20F24132         | 17.0 % | 0.0191532 ±0.0003031 | 0.9534 | EXP 148 of 150      | 0.0803854 ±0.0055647 | 0.0028 | EXP 150 of 150      | 1.8018330 ±0.0059212 | 0.9032 | EXP 150 of 150      | 149.144252 ±0.014515 | 0.9999 | EXP 148 of 150      | 598.284592 ±0.033488 | 1.0000 | EXP 148 of 150      |
| 20F24459         | 17.0 % | 0.0366519 ±0.0003221 | 0.5286 | EXP 150 of 150      | 0.0093521 ±0.0059149 | 0.0001 | EXP 150 of 150      | 0.3020426 ±0.0063776 | 0.2074 | EXP 150 of 150      | 24.862611 ±0.008885  | 0.9987 | EXP 150 of 150      | 75.242126 ±0.020509  | 0.9962 | EXP 150 of 150      |
| 20F24461         | 17.0 % | 0.0110953 ±0.0001891 | 0.9065 | EXP 150 of 150      | 0.0061481 ±0.0055532 | 0.0035 | EXP 150 of 150      | 0.1551255 ±0.0067182 | 0.0131 | EXP 150 of 150      | 13.973253 ±0.007181  | 0.9972 | EXP 150 of 150      | 58.375909 ±0.020134  | 0.9882 | EXP 150 of 150      |
| 20F24463         | 17.0 % | 0.0077113 ±0.0002058 | 0.9013 | EXP 150 of 150      | 0.0197655 ±0.0056816 | 0.0008 | EXP 149 of 150      | 0.1461002 ±0.0060414 | 0.0491 | EXP 149 of 150      | 12.642742 ±0.007898  | 0.9958 | EXP 149 of 150      | 34.993754 ±0.017449  | 0.7766 | EXP 149 of 150      |



| Project Info |        | Analyst     | Irradiation | X-pos | Y-pos | Z/H-pos | Project                | Experiment | Nmb |
|--------------|--------|-------------|-------------|-------|-------|---------|------------------------|------------|-----|
| 20F24130     | 17.0 % | Dan Miggins | 20-OSU-01   | 0.00  | 0.00  | 53.43   | Oregon\Swenton (20-01) | 20F24126   | 01  |
| 20F24132     | 17.0 % | Dan Miggins | 20-OSU-01   | 0.00  | 0.00  | 53.43   | Oregon\Swenton (20-01) | 20F24126   | 01  |
| 20F24459     | 17.0 % | Dan Miggins | 20-OSU-01   | 0.00  | 0.00  | 53.43   | Oregon\Swenton (20-01) | 20F24459   | 02  |
| 20F24461     | 17.0 % | Dan Miggins | 20-OSU-01   | 0.00  | 0.00  | 53.43   | Oregon\Swenton (20-01) | 20F24459   | 02  |
| 20F24463     | 17.0 % | Dan Miggins | 20-OSU-01   | 0.00  | 0.00  | 53.43   | Oregon\Swenton (20-01) | 20F24459   | 02  |

| OSU Argon Geochronology Lab<br>CEOAS Oregon State University, Corvallis, USA |        |          |          |               |                  |                  |                  |                     |                    |                     |            |       |               |       |           |       |              |                        |     |          |      |      |      |        |    |   |
|------------------------------------------------------------------------------|--------|----------|----------|---------------|------------------|------------------|------------------|---------------------|--------------------|---------------------|------------|-------|---------------|-------|-----------|-------|--------------|------------------------|-----|----------|------|------|------|--------|----|---|
| Sample Parameters                                                            |        | Sample   | Material | Location      | Standard Name    | Standard (in Ma) | %1σ              | Standard Reference  | Standard 40Ar/39Ar | %1σ                 | J          | %1σ   | Air 40Ar/36Ar | %1σ   | MDF (lin) | %1σ   | Volume Ratio | Sensitivity (mol/volt) | Day | Month    | Year | Hour | Min  | Resist |    |   |
|                                                                              |        | 20F24130 | 17.0 %   | EJ-12-19      | Sanidine         | Rhyolite Dome    | FCT-NM (1C44-20) | 28.201              | 0.082              | Kuiper et al (2008) | 9.75262    | 0.152 | 0.00159193    | 0.152 | 299.03    | 0.134 | 0.9996066    | 0.042                  | 1   | 3.54E-14 | 5    | SEP  | 2020 | 7      | 14 | 1 |
|                                                                              |        | 20F24132 | 17.0 %   | EJ-12-19      | Sanidine         | Rhyolite Dome    | FCT-NM (1C44-20) | 28.201              | 0.082              | Kuiper et al (2008) | 9.75262    | 0.152 | 0.00159193    | 0.152 | 299.03    | 0.134 | 0.9996066    | 0.042                  | 1   | 3.54E-14 | 5    | SEP  | 2020 | 7      | 31 | 1 |
|                                                                              |        | 20F24459 | 17.0 %   | EJ-12-19      | Sanidine         | Rhyolite Dome    | FCT-NM (1C44-20) | 28.201              | 0.082              | Kuiper et al (2008) | 9.75262    | 0.152 | 0.00159193    | 0.152 | 298.546   | 0.134 | 1.0000117    | 0.042                  | 1   | 3.54E-14 | 7    | SEP  | 2020 | 18     | 53 | 1 |
|                                                                              |        | 20F24461 | 17.0 %   | EJ-12-19      | Sanidine         | Rhyolite Dome    | FCT-NM (1C44-20) | 28.201              | 0.082              | Kuiper et al (2008) | 9.75262    | 0.152 | 0.00159193    | 0.152 | 298.546   | 0.134 | 1.0000117    | 0.042                  | 1   | 3.54E-14 | 7    | SEP  | 2020 | 19     | 10 | 1 |
| 20F24463                                                                     | 17.0 % | EJ-12-19 | Sanidine | Rhyolite Dome | FCT-NM (1C44-20) | 28.201           | 0.082            | Kuiper et al (2008) | 9.75262            | 0.152               | 0.00159193 | 0.152 | 298.546       | 0.134 | 1.0000117 | 0.042 | 1            | 3.54E-14               | 7   | SEP      | 2020 | 19   | 28   | 1      |    |   |

| Irradiation Constants |        | 40/36(a) | %1σ   | 40/36(c) | %1σ | 38/36(a) | %1σ   | 38/36(c) | %1σ | 39/37(ca) | %1σ  | 38/37(ca) | %1σ  | 36/37(ca) | %1σ  | 40/39(k) | %1σ  | 38/39(k) | %1σ  | 36/38(cl) | %1σ | K/Ca | %1σ | K/Cl | %1σ | Ca/Cl | %1σ |
|-----------------------|--------|----------|-------|----------|-----|----------|-------|----------|-----|-----------|------|-----------|------|-----------|------|----------|------|----------|------|-----------|-----|------|-----|------|-----|-------|-----|
| 20F24130              | 17.0 % | 298.56   | 0.104 | 0.018    | 35  | 0.1885   | 0.159 | 1.493    | 3   | 0.000643  | 0.92 | 0.00018   | 9.63 | 0.00027   | 0.17 | 0.000607 | 9.65 | 0.012077 | 0.09 | 0         | 0   | 0.43 | 0   | 0    | 0   | 0     | 0   |
| 20F24132              | 17.0 % | 298.56   | 0.104 | 0.018    | 35  | 0.1885   | 0.159 | 1.493    | 3   | 0.000643  | 0.92 | 0.00018   | 9.63 | 0.00027   | 0.17 | 0.000607 | 9.65 | 0.012077 | 0.09 | 0         | 0   | 0.43 | 0   | 0    | 0   | 0     | 0   |
| 20F24459              | 17.0 % | 298.56   | 0.104 | 0.018    | 35  | 0.1885   | 0.159 | 1.493    | 3   | 0.000643  | 0.92 | 0.00018   | 9.63 | 0.00027   | 0.17 | 0.000607 | 9.65 | 0.012077 | 0.09 | 0         | 0   | 0.43 | 0   | 0    | 0   | 0     | 0   |
| 20F24461              | 17.0 % | 298.56   | 0.104 | 0.018    | 35  | 0.1885   | 0.159 | 1.493    | 3   | 0.000643  | 0.92 | 0.00018   | 9.63 | 0.00027   | 0.17 | 0.000607 | 9.65 | 0.012077 | 0.09 | 0         | 0   | 0.43 | 0   | 0    | 0   | 0     | 0   |
| 20F24463              | 17.0 % | 298.56   | 0.104 | 0.018    | 35  | 0.1885   | 0.159 | 1.493    | 3   | 0.000643  | 0.92 | 0.00018   | 9.63 | 0.00027   | 0.17 | 0.000607 | 9.65 | 0.012077 | 0.09 | 0         | 0   | 0.43 | 0   | 0    | 0   | 0     | 0   |

EJ-12-19 (N=2).AGE >>> EJ-12-19 >>> OREGON | SWENTON (20.

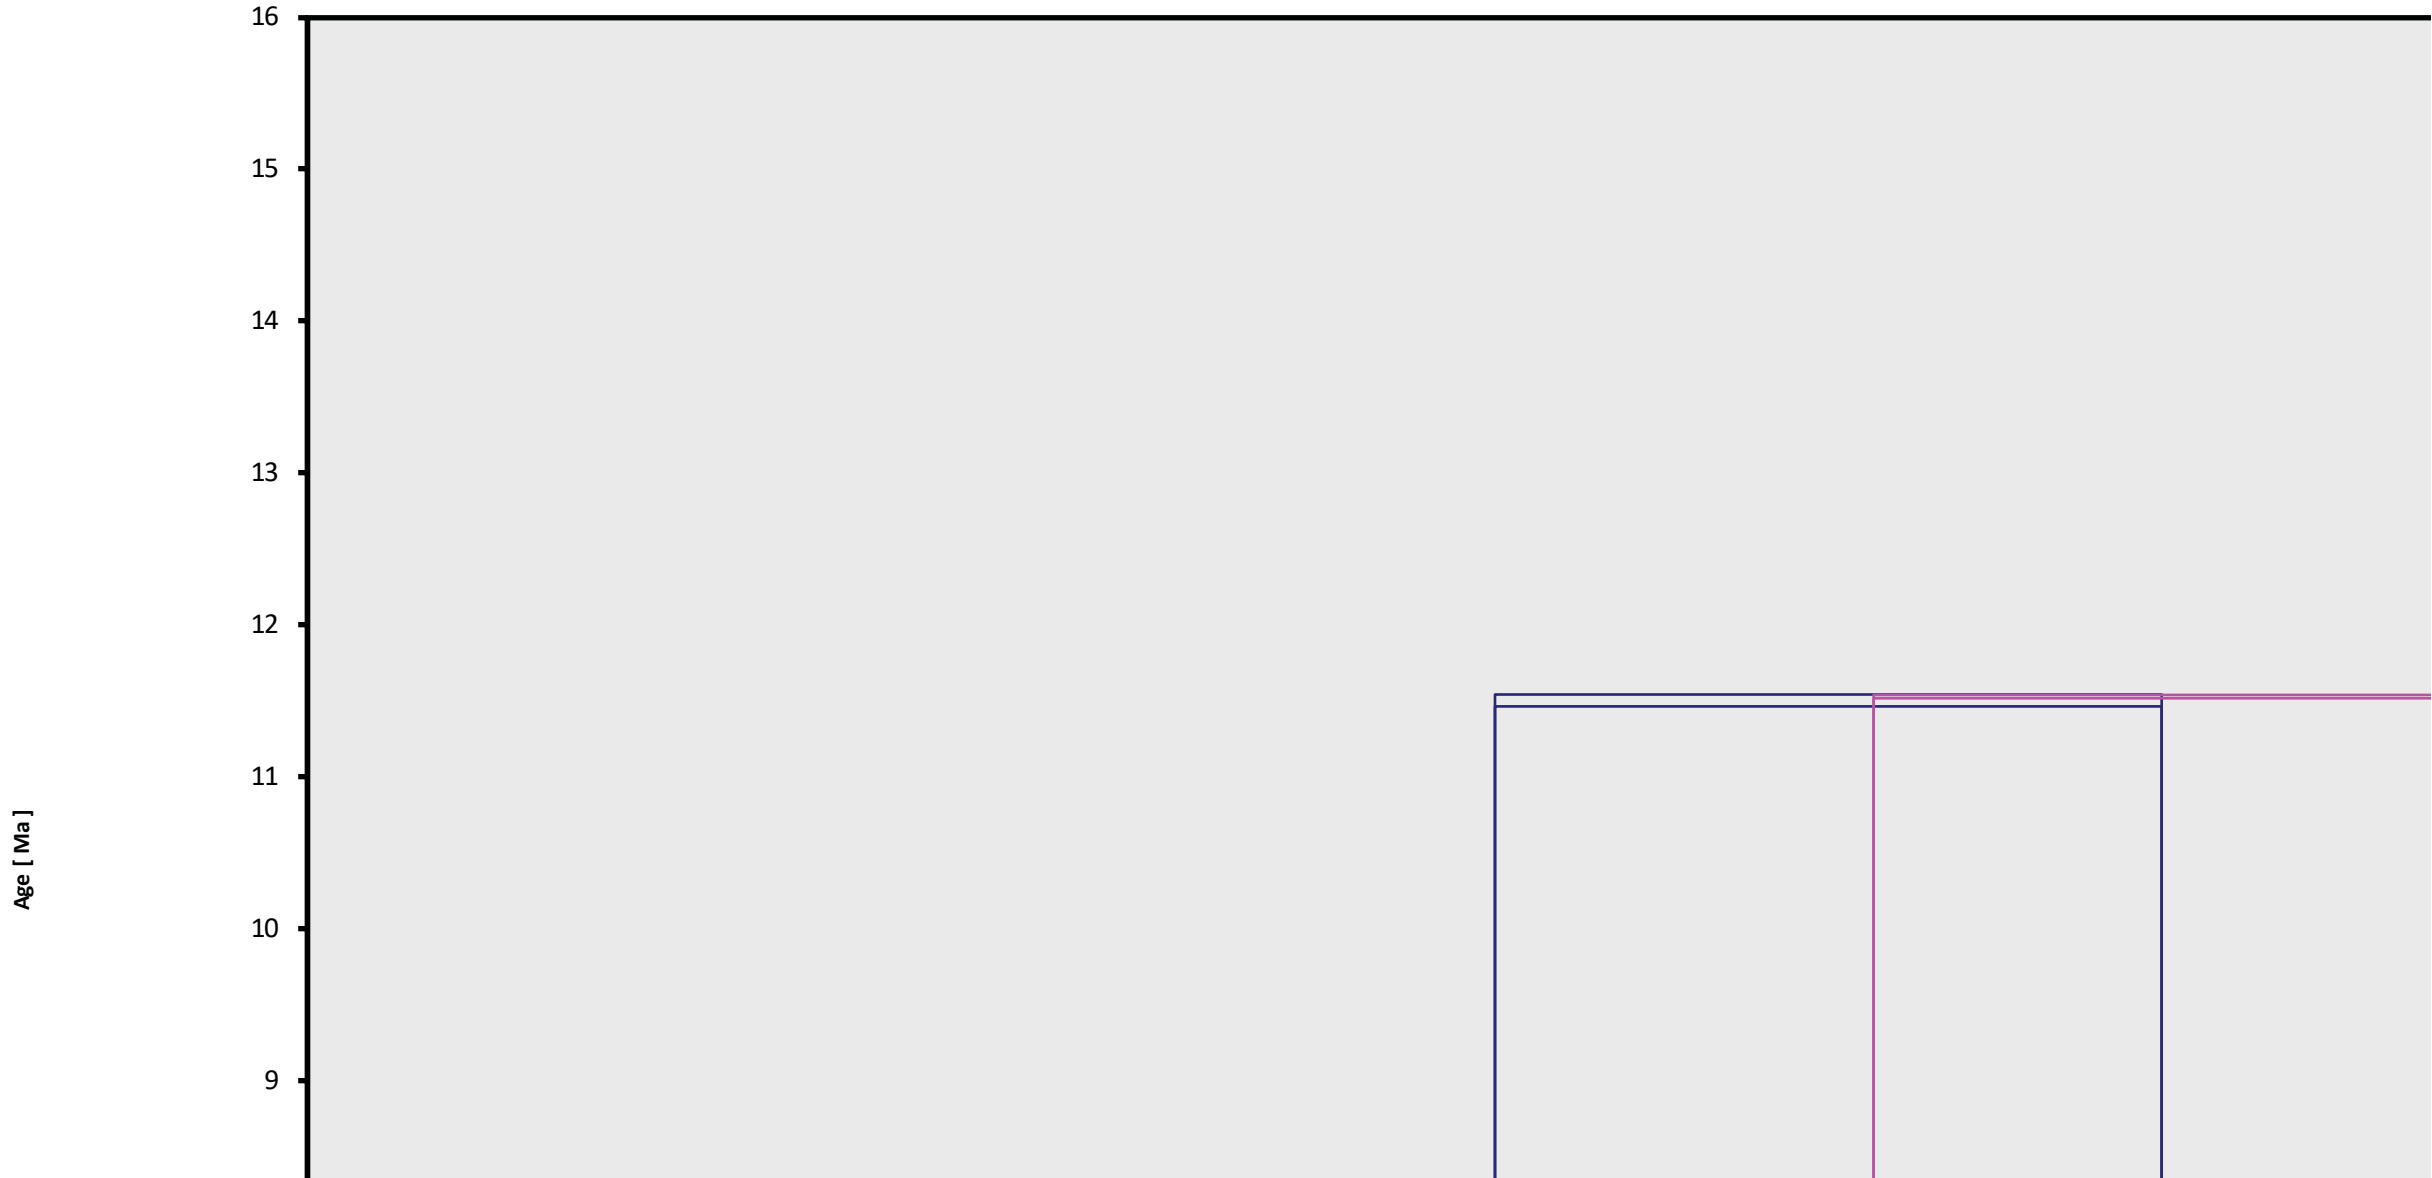

EJ-12-19 (N=2).AGE >>> EJ-12-19 >>> OREGON | SWENTON (20-01) PROJECT

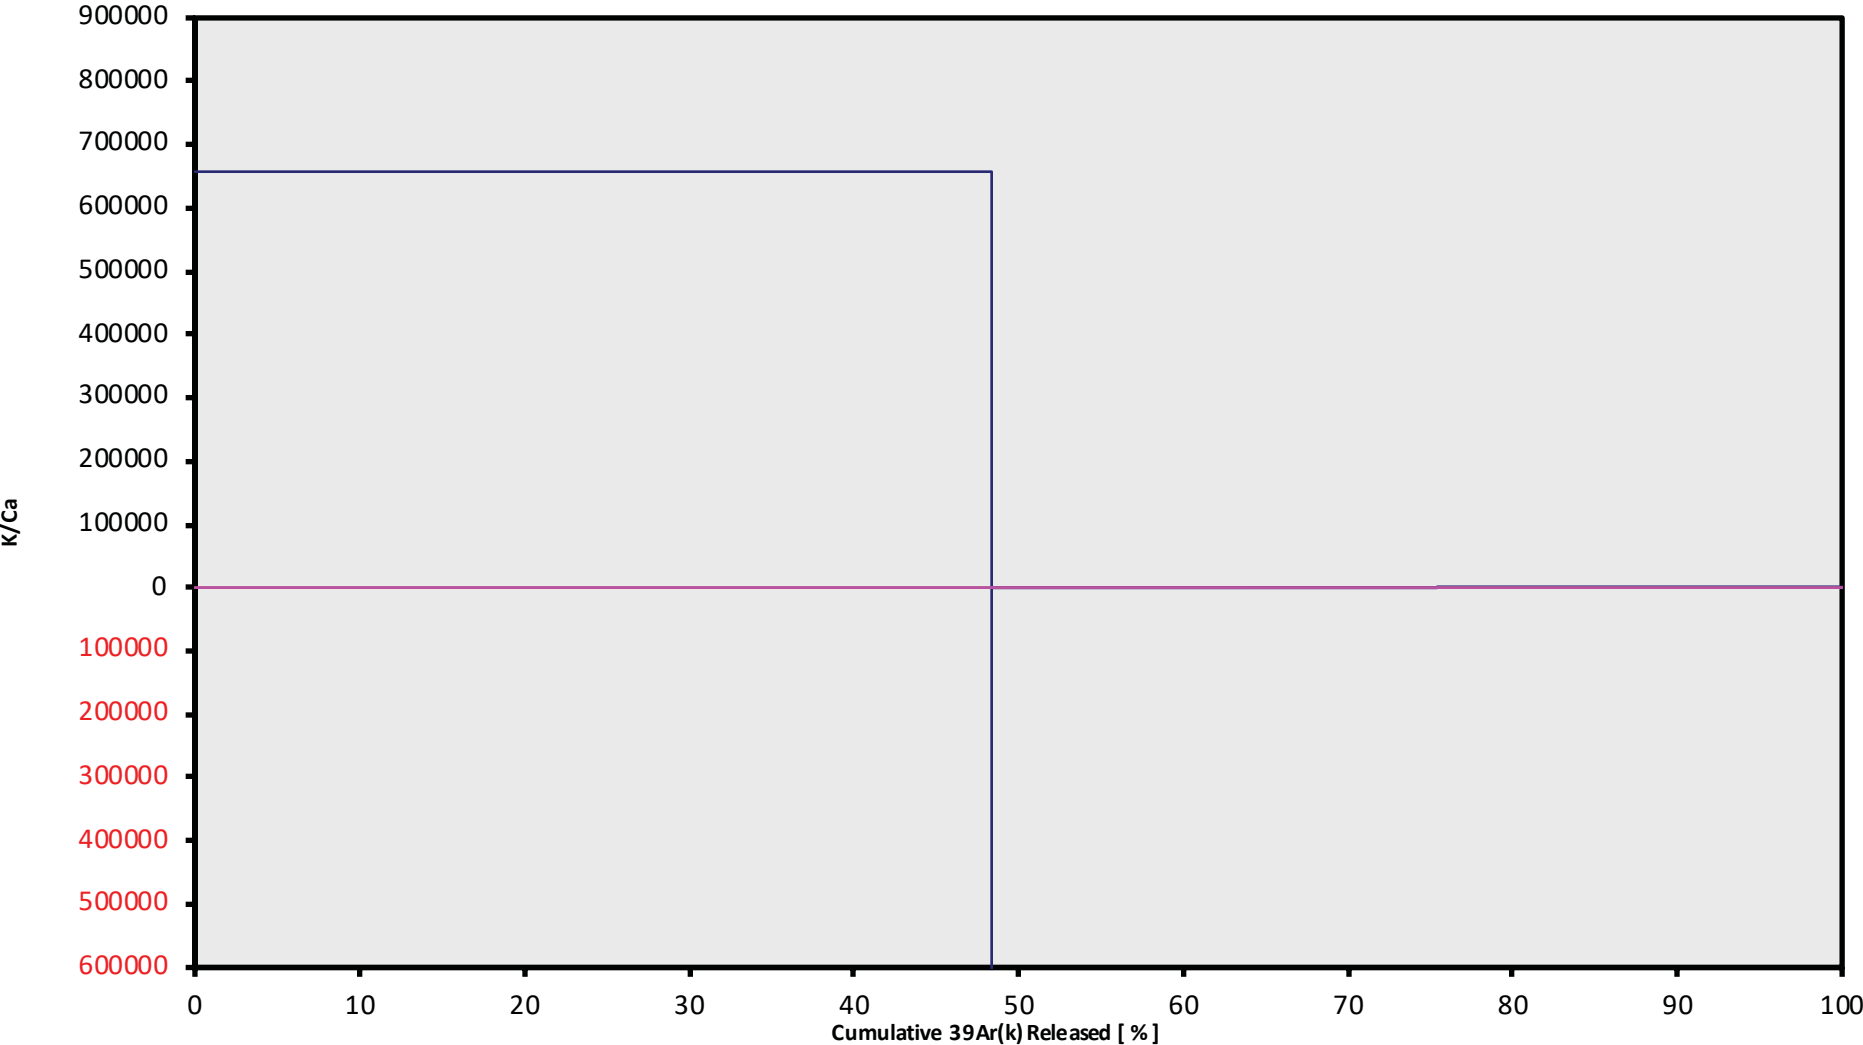

Ar-Ages in Ma

**WEIGHTED PLATEAU**  
 **$7.54 \pm 0.02$**   
**TOTAL FUSION**  
 **$8.95 \pm 0.03$**   
**NORMAL ISOCHRON**  
 **$7.57 \pm 0.05$**   
**INVERSE ISOCHRON**  
 **$7.56 \pm 0.05$**

Sample Info

Sanidine  
Rhyolite Dome  
Dan Miggins

EJ-12-19 (N=2).AGE >>> EJ-12-19 >>> OREGON | SWENTON (20-01) PROJECT

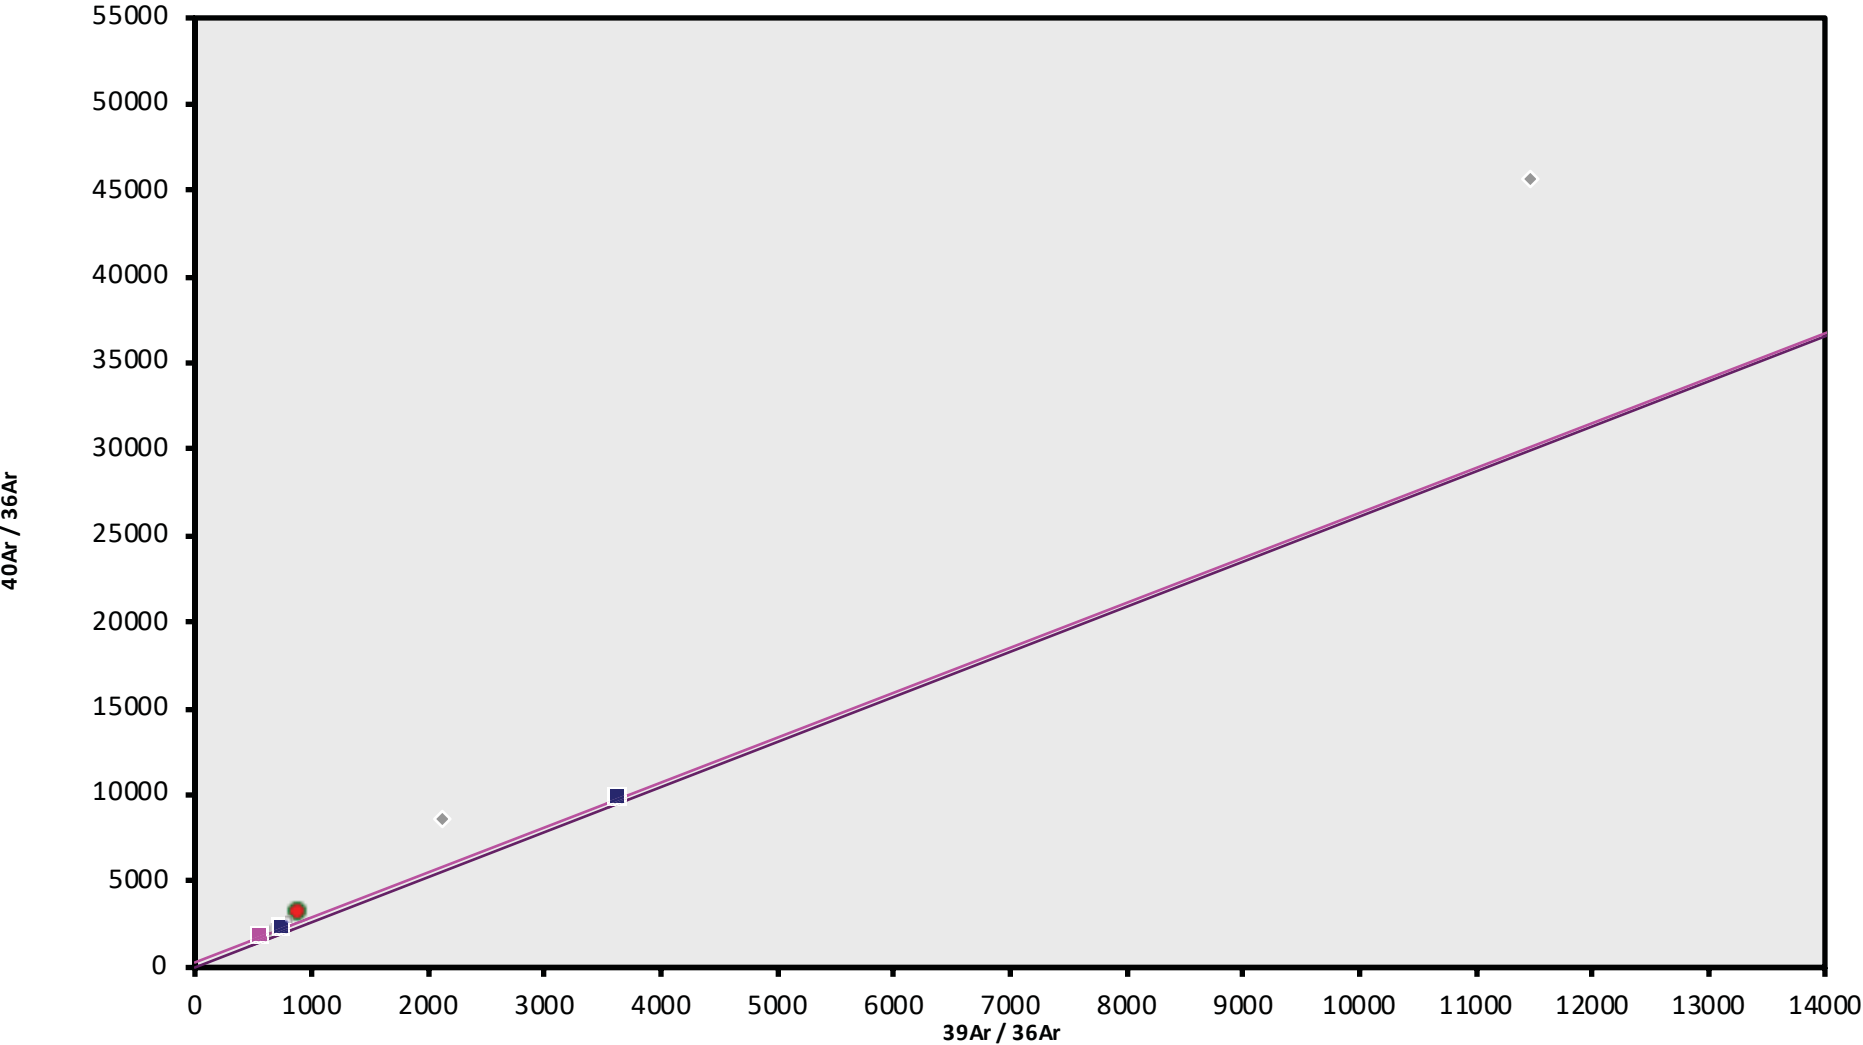

Ar-Ages in Ma

WEIGHTED PLATEAU

$7.54 \pm 0.02$

TOTAL FUSION

$8.95 \pm 0.03$

NORMAL ISOCHRON

$7.57 \pm 0.05$

INVERSE ISOCHRON

$7.56 \pm 0.05$

MSWD (PROBABILITY)

1.05 (30%)

Sample Info

Sanidine

Rhyolite Dome

Dan Miggins

EJ-12-19 (N=2).AGE >>> EJ-12-19 >>> OREGON | SWENTON (20-01) PROJECT

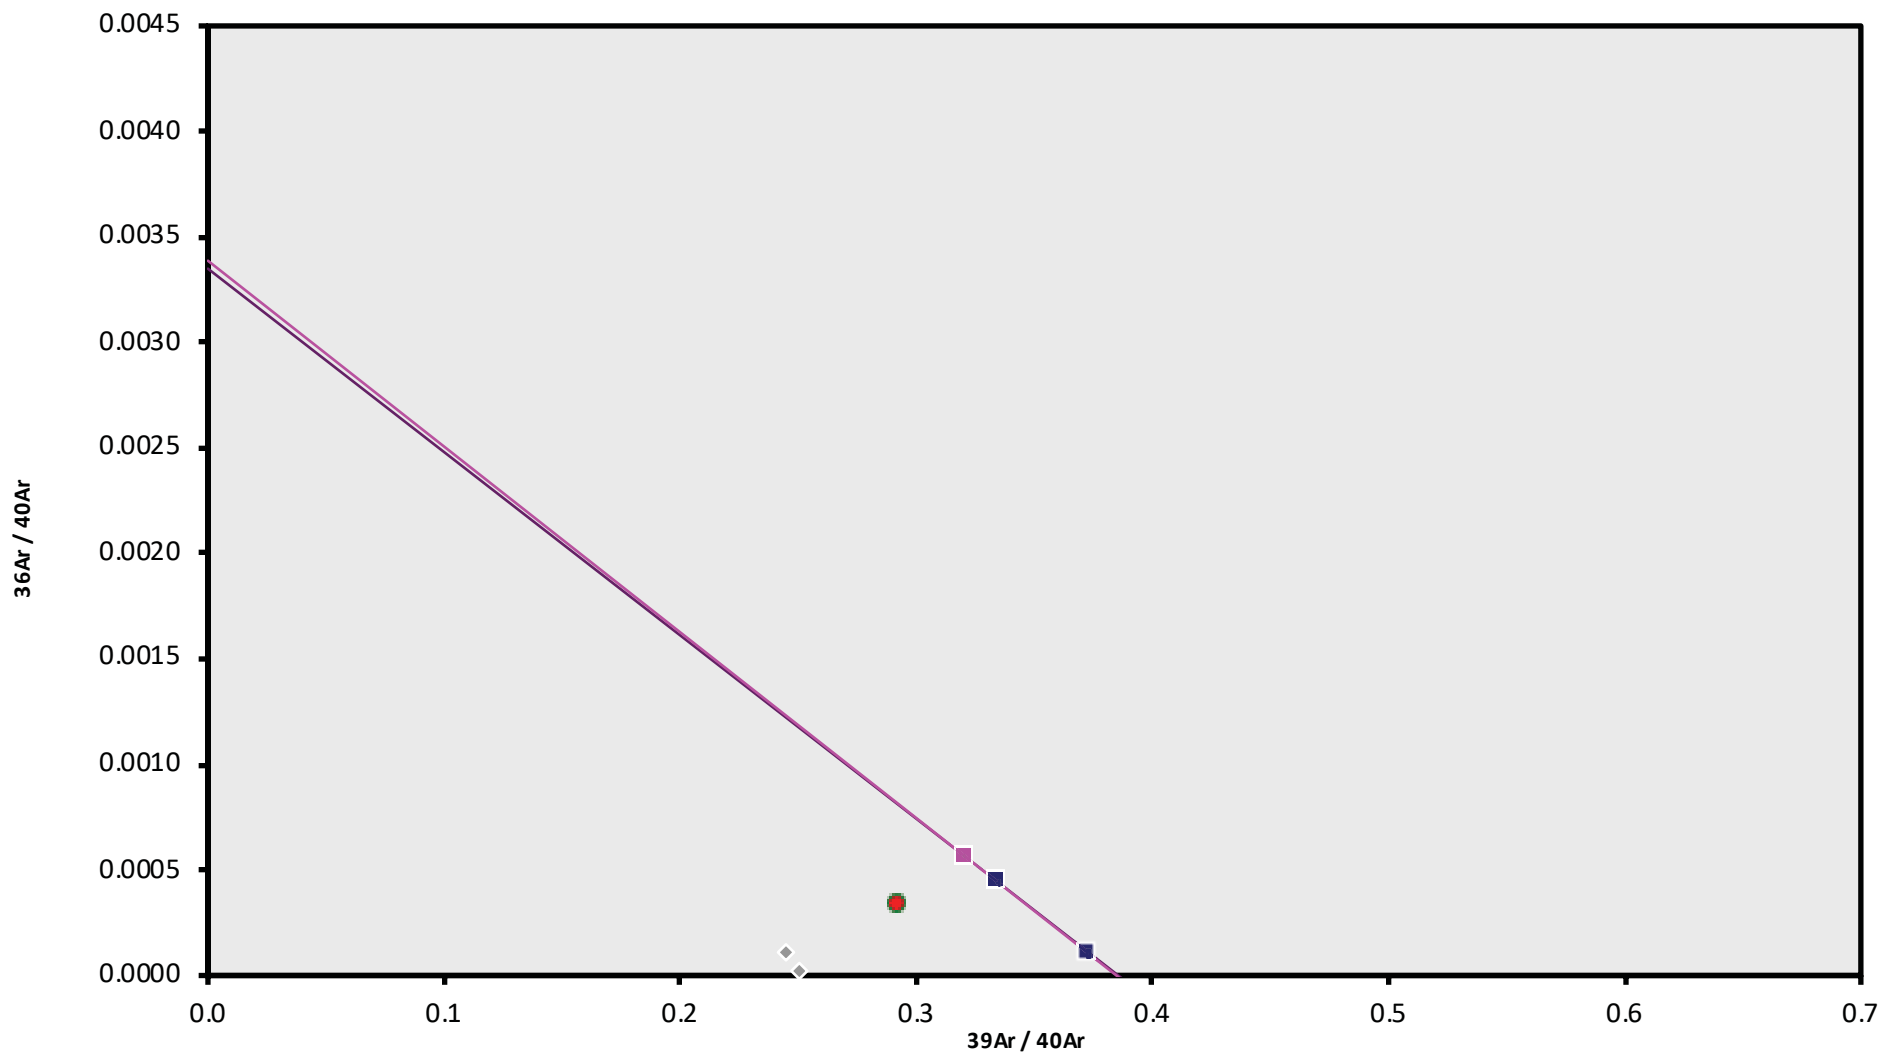

Ar-Ages in Ma

WEIGHTED PLATEAU

$7.54 \pm 0.02$

TOTAL FUSION

$8.95 \pm 0.03$

NORMAL ISOCHRON

$7.57 \pm 0.05$

INVERSE ISOCHRON

$7.56 \pm 0.05$

MSWD (PROBABILITY)

0.83 (36%)

Sample Info

Sanidine

Rhyolite Dome

Dan Miggins

| Relative Abundances |        |   | 36Ar<br>[fA] | %1σ   | 37Ar<br>[fA] | %1σ    | 38Ar<br>[fA] | %1σ   | 39Ar<br>[fA] | %1σ   | 40Ar<br>[fA] | %1σ   | 40(r)/39(k) ± 2σ | Age ± 2σ<br>(Ma) | 40Ar(r)<br>(%) | 39Ar(k)<br>(%) | K/Ca ± 2σ |
|---------------------|--------|---|--------------|-------|--------------|--------|--------------|-------|--------------|-------|--------------|-------|------------------|------------------|----------------|----------------|-----------|
| 20F24130            | 17.0 % | ✓ | 0.4611932    | 0.273 | 1.2689543    | 11.313 | 3.2593437    | 0.314 | 262.43720    | 0.043 | 818.4563     | 0.006 | 2.59379 ±0.00382 | 7.54 ±0.01       | 83.17          | 63.74          | 89 ±20    |
| 20F24132            | 17.0 % | ✓ | 0.0134721    | 2.663 | 1.5969984    | 7.963  | 1.8087743    | 0.493 | 149.31668    | 0.044 | 596.8303     | 0.006 | 3.97042 ±0.00379 | 11.53 ±0.01      | 99.33          | 36.26          | 40 ±6     |
| Σ                   |        |   | 0.4746652    | 0.276 | 2.8659526    | 6.692  | 5.0681179    | 0.268 | 411.75387    | 0.032 | 1415.2866    | 0.004 |                  |                  |                |                |           |

| Information on Analysis and Constants Used in Calculations                                                                                                                                                                                                                                                                                                                                                                                                                                                                                                                                                                                                                                                                                                                                                                                                                                                                                                                                                                                                     |  |
|----------------------------------------------------------------------------------------------------------------------------------------------------------------------------------------------------------------------------------------------------------------------------------------------------------------------------------------------------------------------------------------------------------------------------------------------------------------------------------------------------------------------------------------------------------------------------------------------------------------------------------------------------------------------------------------------------------------------------------------------------------------------------------------------------------------------------------------------------------------------------------------------------------------------------------------------------------------------------------------------------------------------------------------------------------------|--|
| <div>Project = SWENTON (20-01)</div> <div>Sample = EJ-12-19</div> <div>Material = Sanidine</div> <div>Location = Rhyolite Dome</div> <div>Region = Eastern Oregon</div> <div>Analyst = Dan Miggins</div> <div>Irradiation = 20-OSU-01 (1C44-20)</div> <div>Position = X: 0   Y: 0   Z/H: 53.43119 mm</div> <div>FCT-NM Age = 28.201 ± 0.023 Ma</div> <div>FCT-NM Reference = Kuiper et al (2008)</div> <div>FCT-NM 40Ar/39Ar Ratio = 9.75262 ± 0.01482</div> <div>FCT-NM J-value = 0.00159193 ± 0.00000242</div> <div>Air Shot 40Ar/36Ar = 299.0300 ± 0.4007</div> <div>Air Shot MDF = 0.99960655 ± 0.00042394 (LIN)</div> <div>Experiment Type = Total Fusion</div> <div>Extraction Method = Single Crystal Laser Heating</div> <div>Heating = 62 sec</div> <div>Isolation = 1.62 min</div> <div>Instrument = ARGUS-VI-F</div> <div>Preferred Age = Ideogram Age</div> <div>Age Classification = Eruption Age</div> <div>IGSN = Undefined</div> <div>Rock Class = Undefined</div> <div>Lithology = Undefined</div> <div>Lat-Lon = Undefined - Undefined</div> |  |

Age Equations = Min et al. (2000)  
Negative Intensities = Allowed  
Collector Calibrations = 36Ar  
Decay 40K = 5.463 ± 0.107 E-10 1/a  
Decay 39Ar = 2.940 ± 0.016 E-07 1/h  
Decay 37Ar = 8.230 ± 0.012 E-04 1/h  
Decay 36Cl = 2.257 ± 0.015 E-06 1/a  
Decay 40K(EC,β<sup>+</sup>) = 0.580 ± 0.014 E-10 1/a  
Decay 40K(β<sup>-</sup>) = 4.884 ± 0.099 E-10 1/a  
Atmospheric 40/36(a) = 298.56 ± 0.31  
Atmospheric 38/36(a) = 0.1885 ± 0.0003  
Production 39/37(ca) = 0.0006425 ± 0.0000059  
Production 38/37(ca) = 0.0001800 ± 0.0000173  
Production 36/37(ca) = 0.0002703 ± 0.0000005  
Production 40/39(k) = 0.000607 ± 0.000059  
Production 38/39(k) = 0.012077 ± 0.000011  
Production 36/38(cl) = 262.80 ± 1.71  
Scaling Ratio K/Ca = 0.430  
Abundance Ratio 40K/K = 1.1700 ± 0.0100 E-04  
Atomic Weight K = 39.0983 ± 0.0001 g

| Results          | 40(a)/36(a) ± 2σ | 40(r)/39(k) ± 2σ | Age ± 2σ<br>(Ma)          | MSWD | 39Ar(k)<br>(%,n) | K/Ca ± 2σ           |
|------------------|------------------|------------------|---------------------------|------|------------------|---------------------|
| Age Plateau      |                  | 3.28671          | ±1.37660                  |      | >100             | 100.00              |
| Error Mean       |                  |                  | ±41.88%                   |      | 0%               | 2                   |
|                  |                  |                  | Full External Error ±4.02 |      | 3.83             | 2σ Confidence Limit |
|                  |                  |                  | Analytical Error ±3.99    |      | >10              | Error Magnification |
| Total Fusion Age |                  | 3.09301          | ±0.00284                  |      |                  | 2                   |
|                  |                  |                  | ±0.09%                    |      |                  | 62 ±8               |
|                  |                  |                  | Full External Error ±0.47 |      |                  |                     |
|                  |                  |                  | Analytical Error ±0.01    |      |                  |                     |
| Normal Isochron  |                  |                  |                           |      |                  |                     |
| Cannot Calculate |                  |                  |                           |      |                  |                     |
| Inverse Isochron |                  |                  |                           |      |                  |                     |
| Cannot Calculate |                  |                  |                           |      |                  |                     |



| Incremental Heating |        |   | 36Ar(a)<br>[fA] | 37Ar(ca)<br>[fA] | 38Ar(cl)<br>[fA] | 39Ar(k)<br>[fA] | 40Ar(r)<br>[fA] | Age ± 2σ<br>(Ma) | 40Ar(r)<br>(%) | 39Ar(k)<br>(%) | K/Ca ± 2σ |
|---------------------|--------|---|-----------------|------------------|------------------|-----------------|-----------------|------------------|----------------|----------------|-----------|
| 20F24130            | 17.0 % | ✓ | 0.4608495       | 1.2689543        | 0.0028009        | 262.43638       | 680.7058        | 7.54 ± 0.01      | 83.17          | 63.74          | 89 ± 20   |
| 20F24132            | 17.0 % | ✓ | 0.0130398       | 1.5969984        | 0.0027437        | 149.31565       | 592.8465        | 11.53 ± 0.01     | 99.33          | 36.26          | 40 ± 6    |
| Σ                   |        |   | 0.4738893       | 2.8659526        | 0.0055446        | 411.75203       | 1273.5523       |                  |                |                |           |

| Information on Analysis                                                                                                                                                                                                                                 | Results          | 40(r)/39(k) ± 2σ          | Age ± 2σ<br>(Ma)           | MSWD  | 39Ar(k)<br>(%,n)    | K/Ca ± 2σ |
|---------------------------------------------------------------------------------------------------------------------------------------------------------------------------------------------------------------------------------------------------------|------------------|---------------------------|----------------------------|-------|---------------------|-----------|
| Project = SWENTON (20-01)<br>Sample = EJ-12-19<br>Material = Sanidine<br>Location = Rhyolite Dome<br>Region = Eastern Oregon<br>Analyst = Dan Miggins<br>Irradiation = 20-OSU-01 (1C44-20)<br>J = 0.00159193 ± 0.00000242<br>FCT-NM = 28.201 ± 0.023 Ma | Age Plateau      | 3.28671 ± 1.37660         | 9.55 ± 3.99                | > 100 | 100.00              | 45 ± 28   |
|                                                                                                                                                                                                                                                         | Error Mean       | ± 41.88%                  | ± 41.78%                   | 0%    | 2                   |           |
|                                                                                                                                                                                                                                                         |                  |                           | Full External Error ± 4.02 | 3.83  | 2σ Confidence Limit |           |
|                                                                                                                                                                                                                                                         |                  |                           | Analytical Error ± 3.99    | > 10  | Error Magnification |           |
|                                                                                                                                                                                                                                                         | Total Fusion Age | 3.09301 ± 0.00284 ± 0.09% | 8.99 ± 0.03 ± 0.32%        |       | 2                   | 62 ± 8    |
|                                                                                                                                                                                                                                                         |                  |                           | Full External Error ± 0.47 |       |                     |           |
|                                                                                                                                                                                                                                                         |                  |                           | Analytical Error ± 0.01    |       |                     |           |

| Normal Isochron |        |   | $^{39}\text{K}/^{36}\text{Ar} \pm 2\sigma$ | $^{40}\text{Ar}/^{36}\text{Ar} \pm 2\sigma$ | r.i.   |
|-----------------|--------|---|--------------------------------------------|---------------------------------------------|--------|
| 20F24130        | 17.0 % | ✓ | 569.46 $\pm$ 3.15                          | 1775.63 $\pm$ 9.71                          | 0.9875 |
| 20F24132        | 17.0 % | ✓ | 11450.80 $\pm$ 633.16                      | 45763.11 $\pm$ 2530.13                      | 0.9999 |

| Results | $^{40}\text{Ar}/^{36}\text{Ar} \pm 2\sigma$ | $^{40}\text{Ar}/^{39}\text{Ar} \pm 2\sigma$ | Age $\pm 2\sigma$ (Ma) | MSWD |
|---------|---------------------------------------------|---------------------------------------------|------------------------|------|
|---------|---------------------------------------------|---------------------------------------------|------------------------|------|

Normal Isochron  
Cannot Calculate

| Inverse Isochron |        |   | 39(k)/40(a+r) ± 2σ   | 36(a)/40(a+r) ± 2σ     | r.i.   |
|------------------|--------|---|----------------------|------------------------|--------|
| 20F24130         | 17.0 % | ✓ | 0.3207104 ±0.0002796 | 0.00056318 ±0.00000308 | 0.0030 |
| 20F24132         | 17.0 % | ✓ | 0.2502191 ±0.0002209 | 0.00002185 ±0.00000121 | 0.0003 |

| Results | 40(a)/36(a) ± 2σ | 40(r)/39(k) ± 2σ | Age ± 2σ (Ma) | MSWD |
|---------|------------------|------------------|---------------|------|
|---------|------------------|------------------|---------------|------|

Inverse Isochron  
Cannot Calculate

.....

\_\_\_\_\_

| Degassing Patterns |        |   | 36Ar(a)<br>[fA] | %1σ  | 36Ar(c)<br>[fA] | %1σ  | 36Ar(ca)<br>[fA] | %1σ   | 36Ar(cl)<br>[fA] | %1σ    | 37Ar(ca)<br>[fA] | %1σ       | 38Ar(a)<br>[fA] | %1σ       | 38Ar(c)<br>[fA] | %1σ  | 38Ar(k)<br>[fA] | %1σ  | 38Ar(ca)<br>[fA] | %1σ   | 38Ar(cl)<br>[fA] | %1σ    | 39Ar(k)<br>[fA] | %1σ  | 39Ar(ca)<br>[fA] | %1σ   | 40Ar(r)<br>[fA] | %1σ  | 40Ar(a)<br>[fA] | %1σ  | 40Ar(c)<br>[fA] | %1σ  | 40Ar(k)<br>[fA] | %1σ  |  |           |      |  |  |  |  |  |  |  |  |  |           |      |
|--------------------|--------|---|-----------------|------|-----------------|------|------------------|-------|------------------|--------|------------------|-----------|-----------------|-----------|-----------------|------|-----------------|------|------------------|-------|------------------|--------|-----------------|------|------------------|-------|-----------------|------|-----------------|------|-----------------|------|-----------------|------|--|-----------|------|--|--|--|--|--|--|--|--|--|-----------|------|
| 20F24130           | 17.0 % | ✓ | 0.4608495       | 0.27 | 0.0000000       | 0.00 | 0.0003430        | 11.31 | 0.0000006        | 461.20 | 1.2689543        | 11.31     | 0.0868701       | 0.32      | 0.0000000       | 0.00 | 3.1694442       | 0.10 | 0.0002284        | 14.86 | 0.0028009        | 461.20 | 262.43638       | 0.04 | 0.0008153        | 11.35 | 680.7058        | 0.06 | 137.59124       | 0.29 | 0.0000000       | 0.00 | 0.1592989       | 9.65 |  |           |      |  |  |  |  |  |  |  |  |  |           |      |
| 20F24132           | 17.0 % | ✓ | 0.0130398       | 2.76 | 0.0000000       | 0.00 | 0.0004317        | 7.96  | 0.0000006        | 363.31 | 1.5969984        | 7.96      | 0.0024580       | 2.77      | 0.0000000       | 0.00 | 1.8032851       | 0.10 | 0.0002875        | 12.50 | 0.0027437        | 363.31 | 149.31565       | 0.04 | 0.0010261        | 8.02  | 592.8465        | 0.02 | 3.89315         | 2.77 | 0.0000000       | 0.00 | 0.0906346       | 9.65 |  |           |      |  |  |  |  |  |  |  |  |  |           |      |
| Σ                  |        |   | 0.4738893       | 0.28 | 0.0000000       | 0.00 | 0.0007747        | 6.69  | 0.0000013        | 294.28 | 2.8659526        | 6.69      | 0.0893281       | 0.32      | 0.0000000       | 0.00 | 4.9727293       | 0.07 | 0.0005159        | 9.58  | 0.0055446        | 294.28 | 411.75203       | 0.03 | 0.0018414        | 6.72  | 1273.5523       | 0.03 | 141.48439       | 0.29 | 0.0000000       | 0.00 | 0.2499335       | 7.08 |  |           |      |  |  |  |  |  |  |  |  |  |           |      |
| Σ                  |        |   |                 |      |                 |      |                  |       |                  |        |                  | 0.4746652 | 0.28            | 2.8659526 | 6.69            |      |                 |      |                  |       |                  |        |                 |      | 5.0681179        | 0.33  |                 |      |                 |      |                 |      |                 |      |  | 411.75387 | 0.03 |  |  |  |  |  |  |  |  |  | 1415.2866 | 0.04 |

| Additional Parameters |        |   | 40Ar/39Ar | 1σ       | 37Ar/39Ar | 1σ       | 36Ar/39Ar | 1σ       | Time (days) | 37Ar (decay) | 39Ar (decay) | 40Ar (moles) |
|-----------------------|--------|---|-----------|----------|-----------|----------|-----------|----------|-------------|--------------|--------------|--------------|
| 20F24130              | 17.0 % | ✓ | 3.118675  | 0.001358 | 0.004835  | 0.000547 | 0.001757  | 0.000005 | 141.697     | 16.465344    | 1.00100119   | 2.897E-11    |
| 20F24132              | 17.0 % | ✓ | 3.997077  | 0.001763 | 0.010695  | 0.000852 | 0.000090  | 0.000002 | 141.708     | 16.469184    | 1.00100128   | 2.113E-11    |

| Procedure<br>Blanks |        | 36Ar ± 1σ (SE)<br>[fA] | 37Ar ± 1σ (SE)<br>[fA] | 38Ar ± 1σ (SE)<br>[fA] | 39Ar ± 1σ (SE)<br>[fA] | 40Ar ± 1σ (SE)<br>[fA] |
|---------------------|--------|------------------------|------------------------|------------------------|------------------------|------------------------|
| 20F24130            | 17.0 % | 0.0058584 ±0.0001782   | 0.0131664 ±0.0064060   | 0.0083431 ±0.0069634   | 0.0062389 ±0.0068578   | 1.4278047 ±0.0157206   |
| 20F24132            | 17.0 % | 0.0059666 ±0.0001760   | 0.0164692 ±0.0053243   | 0.0055182 ±0.0064858   | 0.0355104 ±0.0069041   | 1.4542840 ±0.0152029   |

| OSU Argon Geochronology Lab<br>CEOAS Oregon State University, Corvallis, USA |        |                        |        |                        |                        |        |                        |                        |        |                        |                        |        |                        |                        |        |                        |
|------------------------------------------------------------------------------|--------|------------------------|--------|------------------------|------------------------|--------|------------------------|------------------------|--------|------------------------|------------------------|--------|------------------------|------------------------|--------|------------------------|
| Intercept<br>Values                                                          |        | 36Ar ± 1σ (SE)<br>[fA] | r2     | Regression<br>(type,n) | 37Ar ± 1σ (SE)<br>[fA] | r2     | Regression<br>(type,n) | 38Ar ± 1σ (SE)<br>[fA] | r2     | Regression<br>(type,n) | 39Ar ± 1σ (SE)<br>[fA] | r2     | Regression<br>(type,n) | 40Ar ± 1σ (SE)<br>[fA] | r2     | Regression<br>(type,n) |
| 20F24130                                                                     | 17.0 % | 0.4572808 ±0.0009495   | 0.9224 | EXP 150 of 150         | 0.0638109 ±0.0058902   | 0.0118 | EXP 148 of 150         | 3.2484363 ±0.0069457   | 0.9576 | EXP 150 of 150         | 262.07800 ±0.02102     | 0.9999 | EXP 150 of 150         | 819.88411 ±0.04412     | 1.0000 | EXP 150 of 150         |
| 20F24132                                                                     | 17.0 % | 0.0191532 ±0.0003031   | 0.9534 | EXP 148 of 150         | 0.0803854 ±0.0055647   | 0.0028 | EXP 150 of 150         | 1.8018330 ±0.0059212   | 0.9032 | EXP 150 of 150         | 149.14425 ±0.01452     | 0.9999 | EXP 148 of 150         | 598.28459 ±0.03349     | 1.0000 | EXP 148 of 150         |

| Project Info |        | Analyst     | Irradiation | X-pos | Y-pos | Z/H-pos | Project                | Experiment | Nmb |
|--------------|--------|-------------|-------------|-------|-------|---------|------------------------|------------|-----|
| 20F24130     | 17.0 % | Dan Miggins | 20-OSU-01   | 0.00  | 0.00  | 53.43   | Oregon\Swenton (20-01) | 20F24126   | 01  |
| 20F24132     | 17.0 % | Dan Miggins | 20-OSU-01   | 0.00  | 0.00  | 53.43   | Oregon\Swenton (20-01) | 20F24126   | 01  |



| OSU Argon Geochronology Lab<br>CEOAS Oregon State University, Corvallis, USA |        |          |          |               |                  |                  |       |                     |                    |       |            |       |           |       |           |       |              |                        |     |       |      |      |     |        |
|------------------------------------------------------------------------------|--------|----------|----------|---------------|------------------|------------------|-------|---------------------|--------------------|-------|------------|-------|-----------|-------|-----------|-------|--------------|------------------------|-----|-------|------|------|-----|--------|
| Sample Parameters                                                            |        | Sample   | Material | Location      | Standard Name    | Standard (in Ma) | %1σ   | Standard Reference  | Standard 40Ar/39Ar | %1σ   | J          | %1σ   | Air       | %1σ   | MDF (lin) | %1σ   | Volume Ratio | Sensitivity (mol/volt) | Day | Month | Year | Hour | Min | Resist |
|                                                                              |        |          |          |               |                  |                  |       |                     |                    |       |            |       | 40Ar/36Ar |       |           |       |              |                        |     |       |      |      |     |        |
| 20F24130                                                                     | 17.0 % | EJ-12-19 | Sanidine | Rhyolite Dome | FCT-NM (1C44-20) | 28.201           | 0.082 | Kuiper et al (2008) | 9.75262            | 0.152 | 0.00159193 | 0.152 | 299.03    | 0.134 | 0.9996066 | 0.042 | 1            | 3.54E-14               | 5   | SEP   | 2020 | 7    | 14  | 1      |
| 20F24132                                                                     | 17.0 % | EJ-12-19 | Sanidine | Rhyolite Dome | FCT-NM (1C44-20) | 28.201           | 0.082 | Kuiper et al (2008) | 9.75262            | 0.152 | 0.00159193 | 0.152 | 299.03    | 0.134 | 0.9996066 | 0.042 | 1            | 3.54E-14               | 5   | SEP   | 2020 | 7    | 31  | 1      |

| Irradiation Constants |        | 40/36(a) | %1σ   | 40/36(c) | %1σ | 38/36(a) | %1σ   | 38/36(c) | %1σ | 39/37(ca) | %1σ  | 38/37(ca) | %1σ  | 36/37(ca) | %1σ  | 40/39(k) | %1σ  | 38/39(k) | %1σ  | 36/38(cl) | %1σ | K/Ca | %1σ | K/Cl | %1σ | Ca/Cl | %1σ |
|-----------------------|--------|----------|-------|----------|-----|----------|-------|----------|-----|-----------|------|-----------|------|-----------|------|----------|------|----------|------|-----------|-----|------|-----|------|-----|-------|-----|
| 20F24130              | 17.0 % | 298.56   | 0.104 | 0.018    | 35  | 0.1885   | 0.159 | 1.493    | 3   | 0.000643  | 0.92 | 0.00018   | 9.63 | 0.00027   | 0.17 | 0.000607 | 9.65 | 0.012077 | 0.09 | 0         | 0   | 0.43 | 0   | 0    | 0   | 0     | 0   |
| 20F24132              | 17.0 % | 298.56   | 0.104 | 0.018    | 35  | 0.1885   | 0.159 | 1.493    | 3   | 0.000643  | 0.92 | 0.00018   | 9.63 | 0.00027   | 0.17 | 0.000607 | 9.65 | 0.012077 | 0.09 | 0         | 0   | 0.43 | 0   | 0    | 0   | 0     | 0   |

20F24126.AGE >>> EJ-12-19

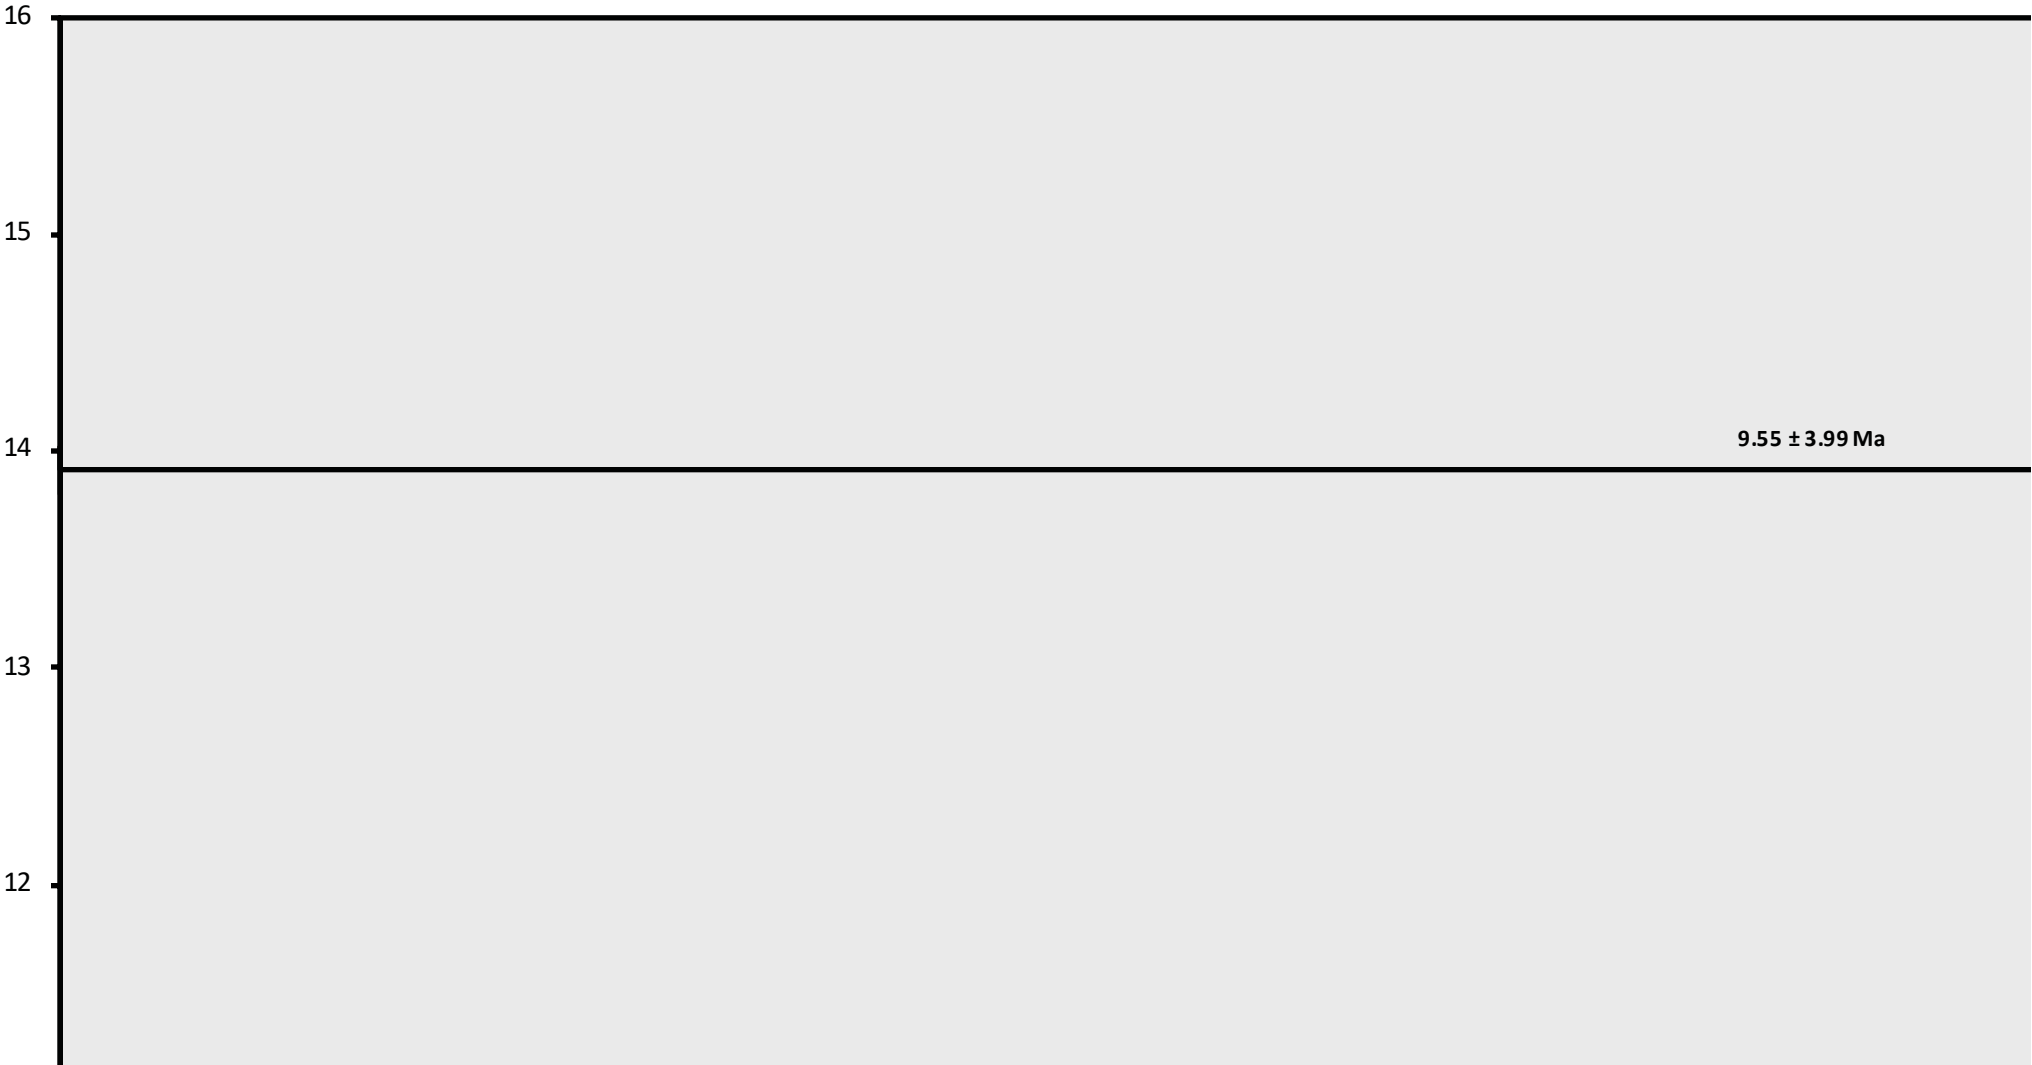

20F24126.AGE >>> EJ-12-19 >>> OREGON | SWENTON (20-01) PROJECT

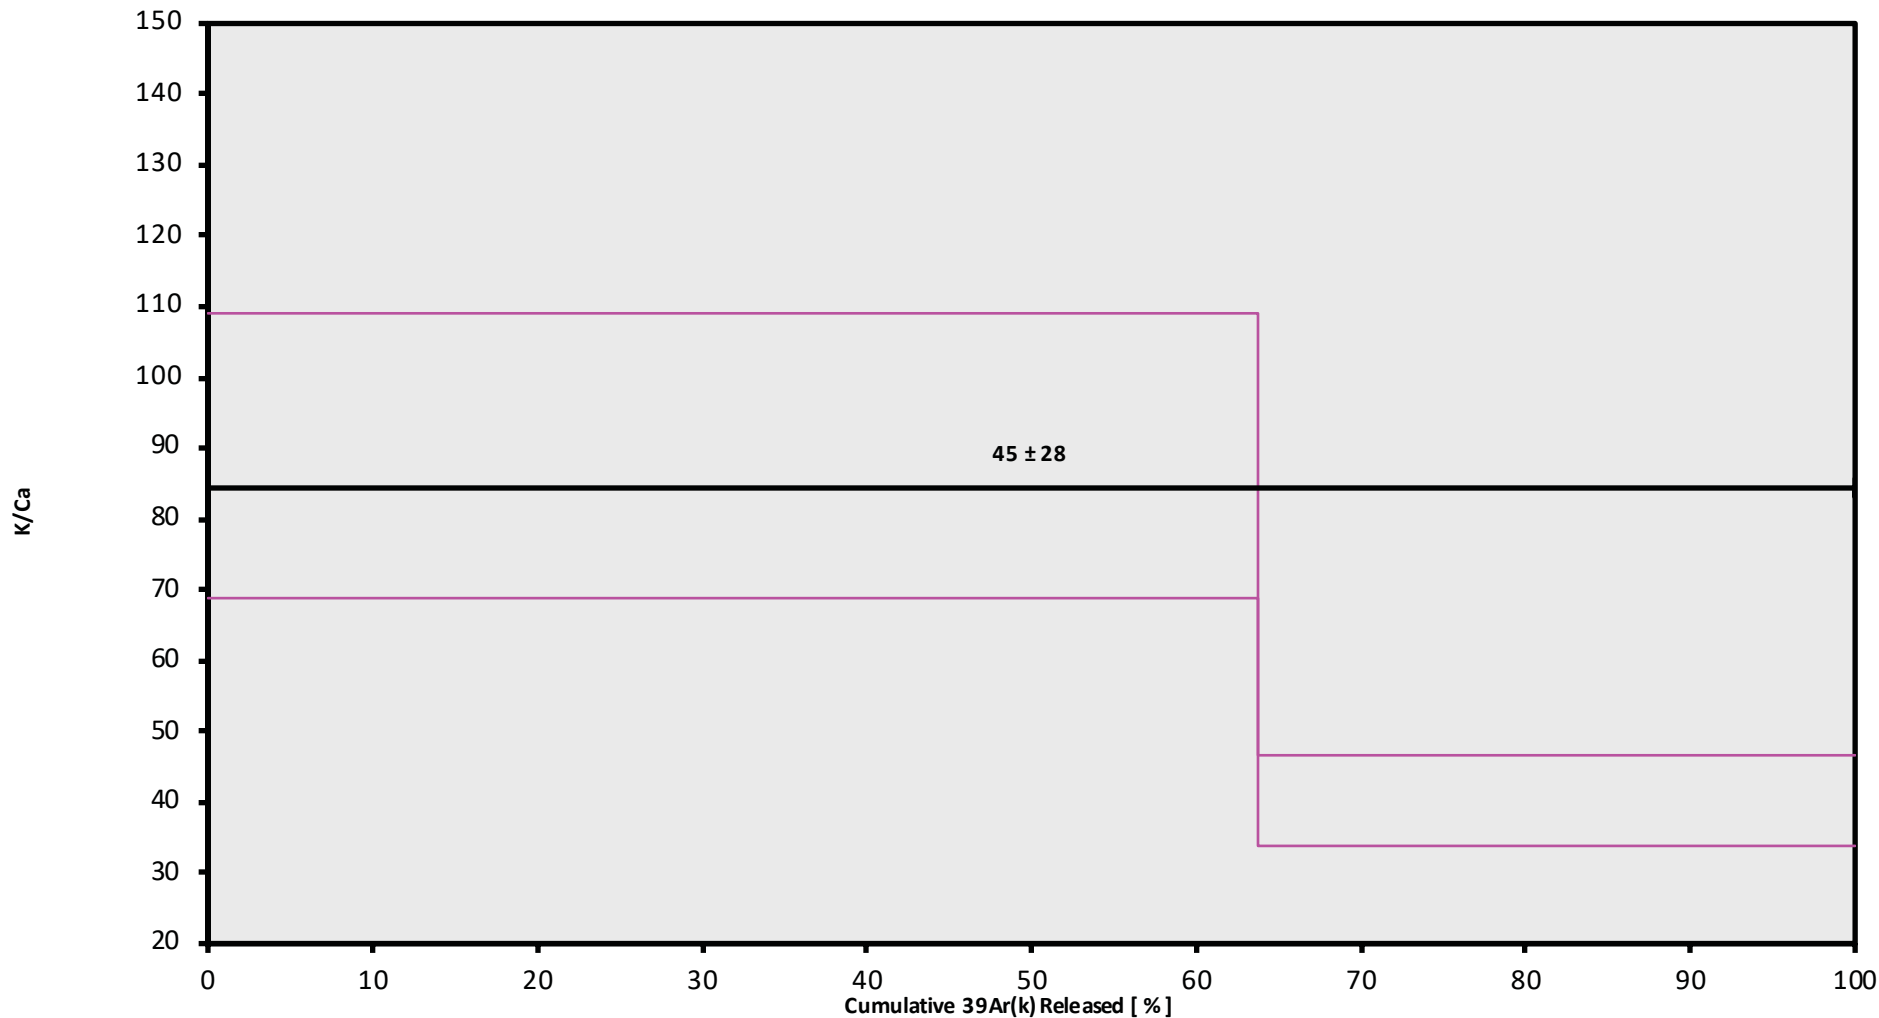

**Ar-Ages in Ma**

**WEIGHTED PLATEAU**  
9.55 ± 3.99

**TOTAL FUSION**  
8.99 ± 0.03

**Sample Info**

Sanidine  
Rhyolite Dome  
Dan Miggins

20F24126.AGE >>> EJ-12-19 >>> OREGON | SWENTON (20-01) PROJECT

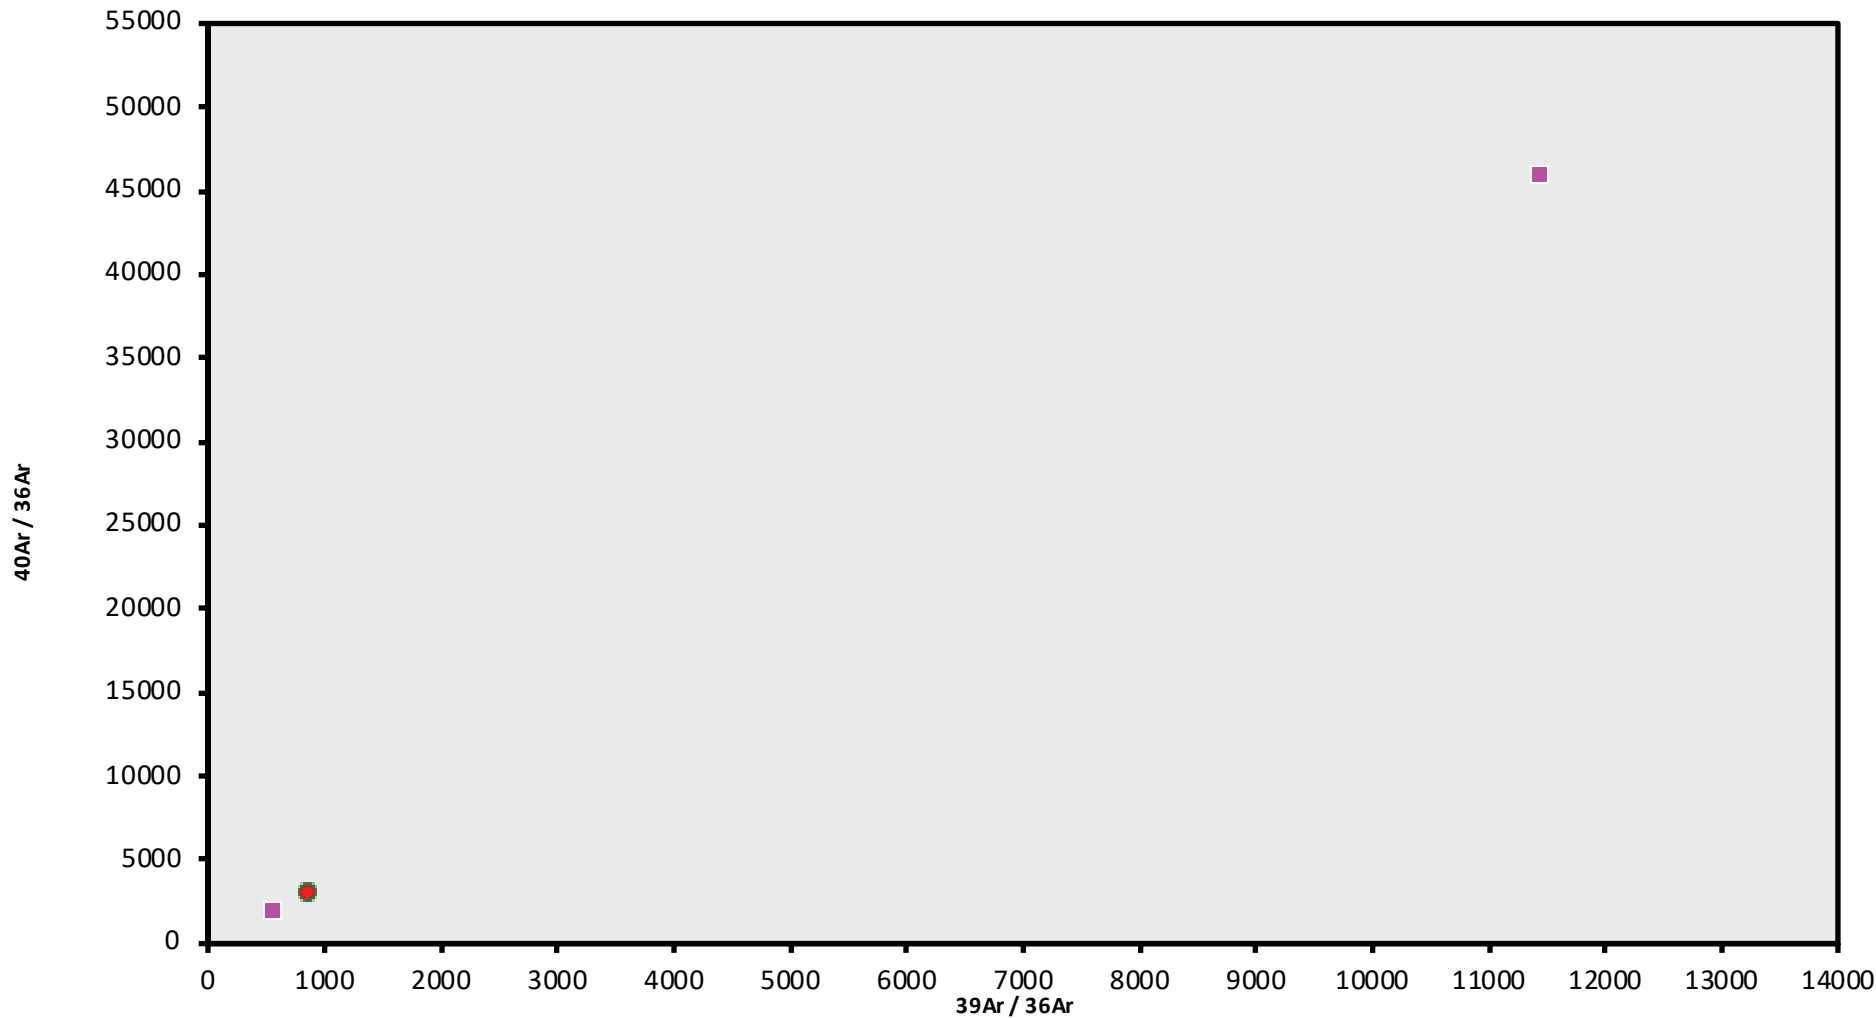

Ar-Ages in Ma

WEIGHTED PLATEAU

$9.55 \pm 3.99$

TOTAL FUSION

$8.99 \pm 0.03$

Sample Info

Sanidine

Rhyolite Dome

Dan Miggins

20F24126.AGE >>> EJ-12-19 >>> OREGON | SWENTON (20-01) PROJECT

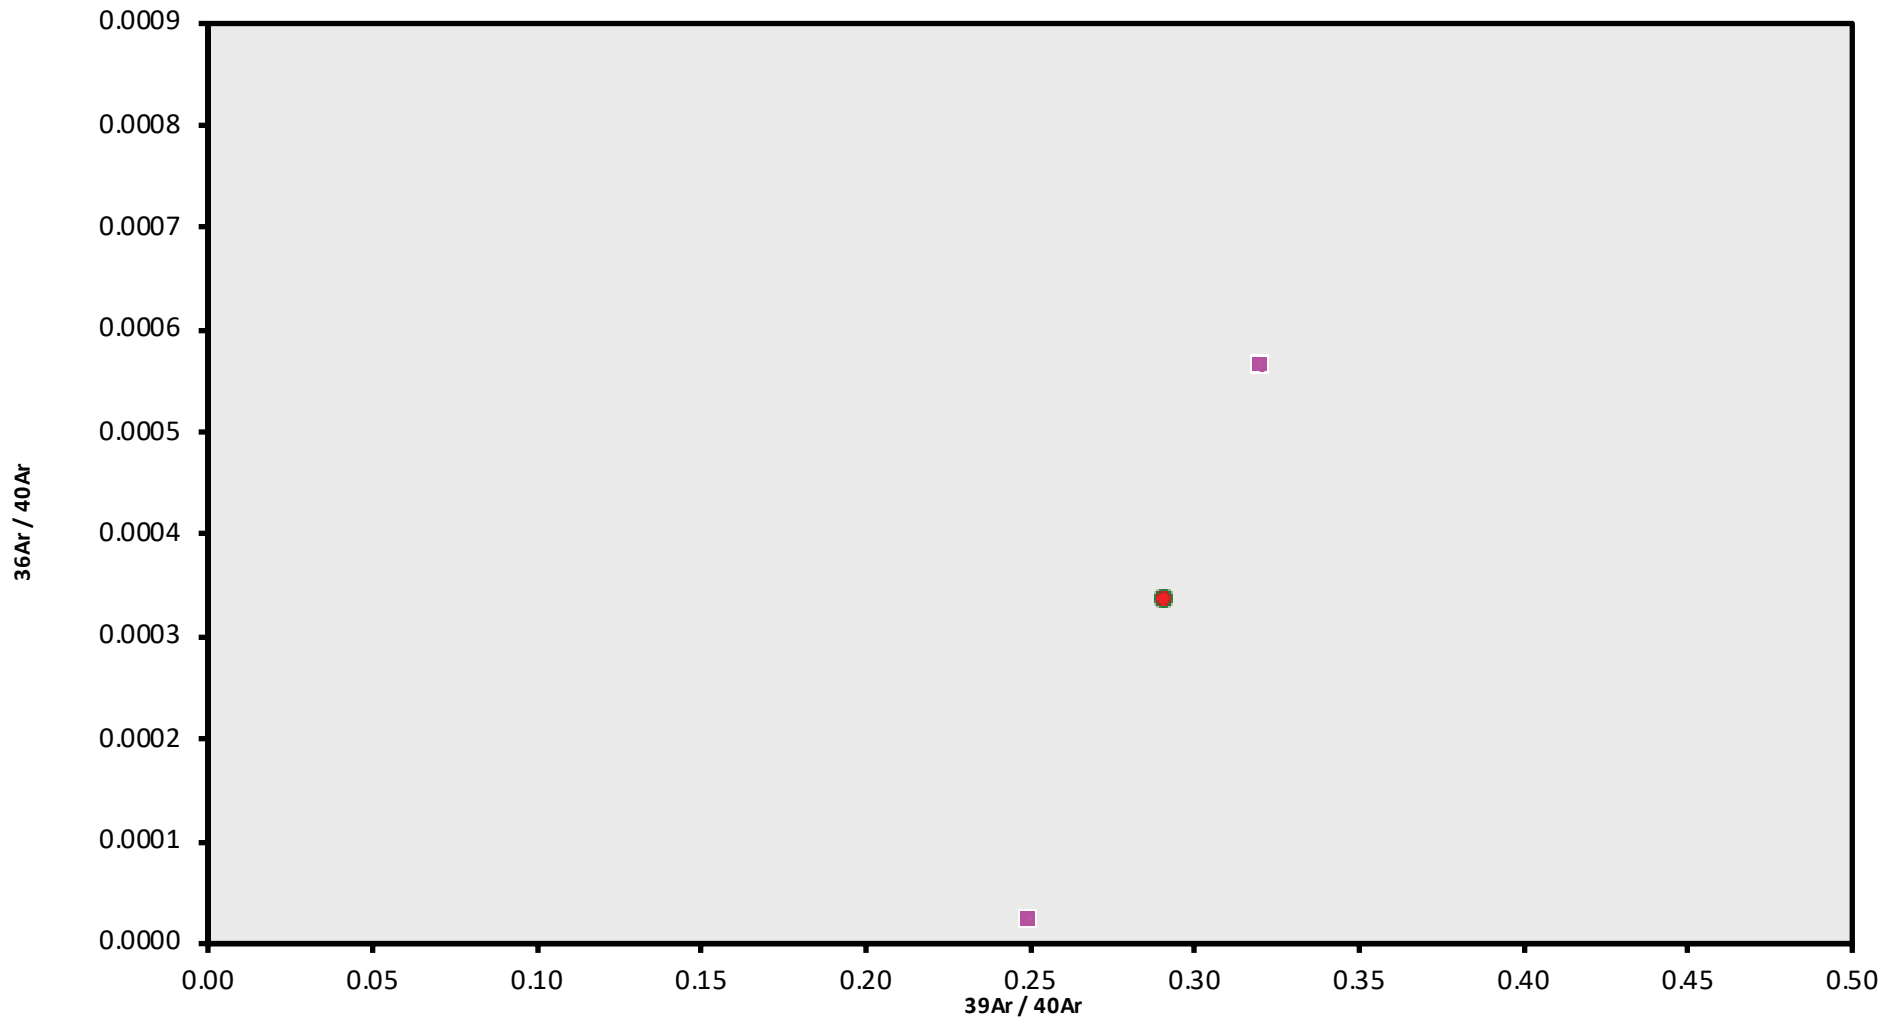

Ar-Ages in Ma

**WEIGHTED PLATEAU**  
 **$9.55 \pm 3.99$**   
**TOTAL FUSION**  
 **$8.99 \pm 0.03$**

Sample Info

**Sanidine**  
**Rhyolite Dome**  
**Dan Miggins**

| Relative Abundances |        |   | 36Ar<br>[fA] | %1σ   | 37Ar<br>[fA] | %1σ     | 38Ar<br>[fA] | %1σ    | 39Ar<br>[fA] | %1σ   | 40Ar<br>[fA] | %1σ   | 40(r)/39(k) ± 2σ | Age ± 2σ<br>(Ma) | 40Ar(r)<br>(%) | 39Ar(k)<br>(%) | K/Ca ± 2σ    |
|---------------------|--------|---|--------------|-------|--------------|---------|--------------|--------|--------------|-------|--------------|-------|------------------|------------------|----------------|----------------|--------------|
| 20F24337            | 17.0 % |   | 0.0186006    | 1.721 | 0.064409     | 220.183 | 0.051435     | 18.486 | 4.0044       | 0.224 | 24.9452      | 0.093 | 4.84337 ±0.05408 | 14.60 ±0.16      | 77.75          | 0.24           | 26.7 ±117.7  |
| 20F24338            | 17.0 % | ✓ | 0.0581470    | 0.780 | 0.531155     | 26.202  | 1.276709     | 0.774  | 105.5244     | 0.043 | 361.5836     | 0.009 | 3.26184 ±0.00386 | 9.85 ±0.01       | 95.19          | 6.31           | 85.4 ±44.8   |
| 20F24340            | 17.0 % |   | 0.1053241    | 0.493 | 7.412258     | 1.856   | 0.524254     | 1.786  | 41.5999      | 0.050 | 155.8732     | 0.017 | 3.00517 ±0.00830 | 9.07 ±0.02       | 80.19          | 2.49           | 2.4 ±0.1     |
| 20F24341            | 17.0 % | ✓ | 0.0344916    | 1.193 | 0.377203     | 37.281  | 1.282768     | 0.774  | 105.6661     | 0.043 | 354.6516     | 0.010 | 3.25858 ±0.00370 | 9.84 ±0.01       | 97.09          | 6.32           | 120.5 ±89.8  |
| 20F24343            | 17.0 % | ✓ | 0.0649170    | 0.737 | 0.781584     | 17.573  | 2.026419     | 0.483  | 165.7172     | 0.042 | 559.8108     | 0.007 | 3.26094 ±0.00328 | 9.84 ±0.01       | 96.53          | 9.91           | 91.2 ±32.0   |
| 20F24344            | 17.0 % | ✓ | 0.0320788    | 1.109 | 0.608900     | 22.228  | 1.154901     | 0.768  | 93.7597      | 0.043 | 318.7894     | 0.011 | 3.29786 ±0.00373 | 9.96 ±0.01       | 96.99          | 5.61           | 66.2 ±29.4   |
| 20F24347            | 17.0 % |   | 0.1494951    | 0.406 | 16.307940    | 0.948   | 0.135476     | 6.467  | 8.7186       | 0.118 | 84.5869      | 0.031 | 4.73863 ±0.04486 | 14.29 ±0.13      | 48.78          | 0.52           | 0.2 ±0.0     |
| 20F24349            | 17.0 % |   | 0.0256808    | 1.260 | 0.529017     | 27.048  | 1.154261     | 0.820  | 95.1272      | 0.043 | 309.0884     | 0.010 | 3.16847 ±0.00347 | 9.57 ±0.01       | 97.51          | 5.69           | 77.3 ±41.8   |
| 20F24350            | 17.0 % |   | 0.0258372    | 1.352 | 0.898134     | 15.495  | 0.334298     | 2.712  | 26.3300      | 0.058 | 71.4683      | 0.032 | 2.42358 ±0.00865 | 7.32 ±0.03       | 89.29          | 1.57           | 12.6 ±3.9    |
| 20F24352            | 17.0 % | ✓ | 0.0198534    | 1.667 | 0.220125     | 63.082  | 1.212413     | 0.774  | 101.6022     | 0.043 | 337.0490     | 0.009 | 3.25857 ±0.00348 | 9.84 ±0.01       | 98.23          | 6.08           | 198.5 ±250.4 |
| 20F24353            | 17.0 % | ✓ | 0.0075850    | 3.226 | 0.134349     | 106.430 | 0.489538     | 1.939  | 40.9388      | 0.049 | 135.7687     | 0.018 | 3.26073 ±0.00499 | 9.84 ±0.02       | 98.32          | 2.45           | 131.0 ±278.9 |
| 20F24356            | 17.0 % | ✓ | 0.2013797    | 0.372 | 0.713071     | 19.025  | 1.653111     | 0.552  | 136.0656     | 0.043 | 503.8401     | 0.007 | 3.26087 ±0.00444 | 9.84 ±0.01       | 88.06          | 8.14           | 82.1 ±31.2   |
| 20F24358            | 17.0 % |   | 0.0398977    | 0.992 | 1.393387     | 10.129  | 0.644600     | 1.437  | 54.1836      | 0.047 | 167.9892     | 0.015 | 2.88204 ±0.00524 | 8.70 ±0.02       | 92.96          | 3.24           | 16.7 ±3.4    |
| 20F24361            | 17.0 % | ✓ | 0.0095261    | 2.885 | 0.117503     | 121.723 | 0.689135     | 1.265  | 56.4550      | 0.046 | 186.9650     | 0.015 | 3.26094 ±0.00433 | 9.84 ±0.01       | 98.47          | 3.38           | 206.6 ±503.0 |
| 20F24362            | 17.0 % | ✓ | 0.0302967    | 1.194 | 0.313926     | 42.515  | 0.912083     | 0.975  | 75.6059      | 0.045 | 256.4587     | 0.013 | 3.27215 ±0.00420 | 9.88 ±0.01       | 96.46          | 4.52           | 103.6 ±88.1  |
| 20F24364            | 17.0 % | ✓ | 0.0245758    | 1.372 | 0.218359     | 64.116  | 0.708279     | 1.263  | 59.7057      | 0.045 | 202.0395     | 0.014 | 3.26073 ±0.00461 | 9.84 ±0.01       | 96.36          | 3.57           | 117.6 ±150.8 |
| 20F24365            | 17.0 % | ✓ | 0.0058795    | 4.434 | 0.309707     | 44.828  | 0.729863     | 1.285  | 60.5322      | 0.045 | 199.6113     | 0.015 | 3.26843 ±0.00404 | 9.87 ±0.01       | 99.11          | 3.62           | 84.0 ±75.3   |
| 20F24367            | 17.0 % |   | 0.0138025    | 1.995 | 0.186143     | 72.687  | 0.430140     | 2.007  | 35.0124      | 0.052 | 120.8288     | 0.022 | 3.33317 ±0.00607 | 10.06 ±0.02      | 96.58          | 2.09           | 80.9 ±117.6  |
| 20F24368            | 17.0 % | ✓ | 0.0239893    | 1.429 | 0.216345     | 63.884  | 0.397307     | 2.319  | 32.4681      | 0.052 | 113.8430     | 0.023 | 3.28566 ±0.00740 | 9.92 ±0.02       | 93.71          | 1.94           | 64.5 ±82.5   |
| 20F24370            | 17.0 % | ✓ | 0.0128974    | 1.959 | 0.224694     | 64.252  | 0.405211     | 2.233  | 33.4278      | 0.054 | 112.8689     | 0.022 | 3.26125 ±0.00596 | 9.85 ±0.02       | 96.59          | 2.00           | 64.0 ±82.2   |
| 20F24371            | 17.0 % | ✓ | 0.0257178    | 1.181 | 0.161872     | 88.513  | 0.386364     | 2.408  | 31.7607      | 0.053 | 111.0574     | 0.022 | 3.25476 ±0.00691 | 9.83 ±0.02       | 93.08          | 1.90           | 84.4 ±149.4  |
| 20F24373            | 17.0 % |   | 0.0080461    | 3.413 | 0.300182     | 46.799  | 0.321053     | 2.911  | 27.3747      | 0.055 | 94.1031      | 0.025 | 3.35014 ±0.00728 | 10.11 ±0.02      | 97.46          | 1.64           | 39.2 ±36.7   |
| 20F24374            | 17.0 % | ✓ | 0.0153798    | 1.782 | 0.524941     | 27.315  | 0.635422     | 1.443  | 54.4855      | 0.047 | 182.0347     | 0.016 | 3.25689 ±0.00442 | 9.83 ±0.01       | 97.48          | 3.26           | 44.6 ±24.4   |
| 20F24376            | 17.0 % |   | 0.3426940    | 0.290 | 0.254669     | 54.564  | 0.906176     | 1.032  | 69.8926      | 0.045 | 335.8344     | 0.010 | 3.34082 ±0.00956 | 10.08 ±0.03      | 69.53          | 4.18           | 118.0 ±128.8 |
| 20F24377            | 17.0 % |   | 0.0173458    | 1.702 | 19.422034    | 0.879   | 0.073626     | 12.627 | 6.7497       | 0.146 | 21.5545      | 0.111 | 2.66266 ±0.02854 | 8.04 ±0.09       | 83.23          | 0.40           | 0.1 ±0.0     |
| 20F24379            | 17.0 % |   | 0.0402065    | 0.981 | 0.837769     | 15.872  | 1.136592     | 0.818  | 95.6154      | 0.043 | 344.0375     | 0.009 | 3.47271 ±0.00395 | 10.48 ±0.01      | 96.51          | 5.72           | 49.1 ±15.6   |
| 20F24380            | 17.0 % |   | 0.0555021    | 0.816 | 0.421429     | 32.021  | 0.660189     | 1.380  | 54.0016      | 0.047 | 196.5777     | 0.015 | 3.33341 ±0.00604 | 10.06 ±0.02      | 91.57          | 3.23           | 55.1 ±35.3   |
| Σ                   |        |   | 1.4091476    | 0.157 | 53.481103    | 1.371   | 20.331624    | 0.236  | 1672.3247    | 0.010 | 5863.2588    | 0.003 |                  |                  |                |                |              |

| Information on Analysis and Constants Used in Calculations |  |
|------------------------------------------------------------|--|
| Project = <b>SWENTON (20-01)</b>                           |  |
| Sample = <b>EJ-12-21B</b>                                  |  |
| Material = <b>Sanidine</b>                                 |  |
| Location = <b>Rhyolite Dome</b>                            |  |
| Region = <b>Eastern Oregon</b>                             |  |
| Analyst = <b>Dan Miggins</b>                               |  |
| Irradiation = <b>20-OSU-01 (1D7-20)</b>                    |  |
| Position = <b>X: 0   Y: 0   Z/H: 7.233878 mm</b>           |  |
| FCT-NM Age = <b>28.201 ±0.023 Ma</b>                       |  |
| FCT-NM Reference = <b>Kuiper et al (2008)</b>              |  |
| FCT-NM 40Ar/39Ar Ratio = <b>9.38852 ±0.00676</b>           |  |
| FCT-NMJ-value = <b>0.00165367 ±0.000000119</b>             |  |
| Air Shot 40Ar/36Ar = <b>298.4230 ±0.3700</b>               |  |
| Air Shot MDF = <b>1.00011492 ±0.00040531 (LIN)</b>         |  |
| Experiment Type = <b>Total Fusion</b>                      |  |
| Extraction Method = <b>Single Crystal Laser Heating</b>    |  |
| Heating = <b>62 sec</b>                                    |  |
| Isolation = <b>1.62 min</b>                                |  |
| Instrument = <b>ARGUS-VI-F</b>                             |  |
| Preferred Age = <b>Ideogram Age</b>                        |  |
| Age Classification = <b>Eruption Age</b>                   |  |
| IGSN = <b>Undefined</b>                                    |  |
| Rock Class = <b>Undefined</b>                              |  |
| Lithology = <b>Undefined</b>                               |  |
| Lat-Lon = <b>Undefined - Undefined</b>                     |  |

Age Equations = **Min et al. (2000)**  
Negative Intensities = **Allowed**  
Collector Calibrations = **36Ar**  
Decay 40K = **5.463 ±0.107 E-10 1/a**  
Decay 39Ar = **2.940 ±0.016 E-07 1/h**  
Decay 37Ar = **8.230 ±0.012 E-04 1/h**  
Decay 36Cl = **2.257 ±0.015 E-06 1/a**  
Decay 40K(EC,β<sup>+</sup>) = **0.580 ±0.014 E-10 1/a**  
Decay 40K(β<sup>-</sup>) = **4.884 ±0.099 E-10 1/a**  
Atmospheric 40/36(a) = **298.56 ±0.31**  
Atmospheric 38/36(a) = **0.1885 ±0.0003**  
Production 39/37(ca) = **0.0006425 ±0.00000059**  
Production 38/37(ca) = **0.0001800 ±0.0000173**  
Production 36/37(ca) = **0.0002703 ±0.0000005**  
Production 40/39(k) = **0.000607 ±0.000059**  
Production 38/39(k) = **0.012077 ±0.000011**  
Production 36/38(cl) = **262.80 ±1.71**  
Scaling Ratio K/Ca = **0.430**  
Abundance Ratio 40K/K = **1.1700 ±0.0100 E-04**  
Atomic Weight K = **39.0983 ±0.0001 g**

| Results          | 40(a)/36(a) ± 2σ        | 40(r)/39(k) ± 2σ           | Age ± 2σ<br>(Ma)                                    | MSWD              | 39Ar(k)<br>(%,n)                           | K/Ca ± 2σ  |
|------------------|-------------------------|----------------------------|-----------------------------------------------------|-------------------|--------------------------------------------|------------|
| Age Plateau      |                         | 3.26528 ±0.00612<br>±0.19% | 9.86 ±0.02<br>±0.24%                                | 30.48<br>0%       | 68.99<br>15                                | 71.8 ±12.7 |
| Error Mean       |                         |                            | Full External Error ±0.51<br>Analytical Error ±0.02 | 1.76<br>5.5211    | 2σ Confidence Limit<br>Error Magnification |            |
| Total Fusion Age |                         | 3.25652 ±0.00106<br>±0.03% | 9.83 ±0.01<br>±0.15%                                |                   | 27                                         | 13.4 ±0.4  |
|                  |                         |                            | Full External Error ±0.51<br>Analytical Error ±0.00 |                   |                                            |            |
| Normal Isochron  | 296.36 ±18.10<br>±6.11% | 3.26548 ±0.00942<br>±0.29% | 9.86 ±0.03<br>±0.32%                                | 27.84<br>0%       | 68.99<br>15                                |            |
| Error Chron      |                         |                            | Full External Error ±0.51<br>Analytical Error ±0.03 | 1.78<br>5.2767    | 2σ Confidence Limit<br>Error Magnification |            |
|                  |                         |                            |                                                     | 1<br>0.0000013022 | Number of Iterations<br>Convergence        |            |
| Inverse Isochron | 298.44 ±19.86<br>±6.66% | 3.26539 ±0.01036<br>±0.32% | 9.86 ±0.03<br>±0.35%                                | 33.23<br>0%       | 68.99<br>15                                |            |
| Error Chron      |                         |                            | Full External Error ±0.51<br>Analytical Error ±0.03 | 1.78<br>5.7647    | 2σ Confidence Limit<br>Error Magnification |            |
|                  |                         |                            |                                                     | 1<br>0.0000021204 | Number of Iterations<br>Convergence        |            |
|                  |                         |                            |                                                     | 11%               | Spreading Factor                           |            |

| Incremental Heating |        |   | 36Ar(a)<br>[fA] | 37Ar(ca)<br>[fA] | 38Ar(cl)<br>[fA] | 39Ar(k)<br>[fA] | 40Ar(r)<br>[fA] | Age ± 2σ<br>(Ma) | 40Ar(r)<br>(%) | 39Ar(k)<br>(%) | K/Ca ± 2σ     |
|---------------------|--------|---|-----------------|------------------|------------------|-----------------|-----------------|------------------|----------------|----------------|---------------|
| 20F24337            | 17.0 % |   | 0.0185832       | 0.064409         | 0.0000000        | 4.0044          | 19.3946         | 14.60 ± 0.16     | 77.75          | 0.24           | 26.7 ± 117.7  |
| 20F24338            | 17.0 % | ✓ | 0.0580035       | 0.531155         | 0.0000000        | 105.5240        | 344.2021        | 9.85 ± 0.01      | 95.19          | 6.31           | 85.4 ± 44.8   |
| 20F24340            | 17.0 % |   | 0.1033203       | 7.412258         | 0.0010989        | 41.5951         | 125.0007        | 9.07 ± 0.02      | 80.19          | 2.49           | 2.4 ± 0.1     |
| 20F24341            | 17.0 % | ✓ | 0.0343896       | 0.377203         | 0.0000916        | 105.6658        | 344.3201        | 9.84 ± 0.01      | 97.09          | 6.32           | 120.5 ± 89.8  |
| 20F24343            | 17.0 % | ✓ | 0.0647028       | 0.781584         | 0.0127214        | 165.7167        | 540.3925        | 9.84 ± 0.01      | 96.53          | 9.91           | 91.2 ± 32.0   |
| 20F24344            | 17.0 % | ✓ | 0.0319104       | 0.608900         | 0.0164458        | 93.7593         | 309.2053        | 9.96 ± 0.01      | 96.99          | 5.61           | 66.2 ± 29.4   |
| 20F24347            | 17.0 % |   | 0.1450870       | 16.307940        | 0.0000236        | 8.7081          | 41.2645         | 14.29 ± 0.13     | 48.78          | 0.52           | 0.2 ± 0.0     |
| 20F24349            | 17.0 % |   | 0.0255377       | 0.529017         | 0.0005057        | 95.1268         | 301.4061        | 9.57 ± 0.01      | 97.51          | 5.69           | 77.3 ± 41.8   |
| 20F24350            | 17.0 % |   | 0.0255918       | 0.898134         | 0.0113314        | 26.3295         | 63.8116         | 7.32 ± 0.03      | 89.29          | 1.57           | 12.6 ± 3.9    |
| 20F24352            | 17.0 % | ✓ | 0.0197939       | 0.220125         | 0.0000000        | 101.6020        | 331.0777        | 9.84 ± 0.01      | 98.23          | 6.08           | 198.5 ± 250.4 |
| 20F24353            | 17.0 % | ✓ | 0.0075487       | 0.134349         | 0.0000000        | 40.9387         | 133.4901        | 9.84 ± 0.02      | 98.32          | 2.45           | 131.0 ± 278.9 |
| 20F24356            | 17.0 % | ✓ | 0.2011870       | 0.713071         | 0.0000000        | 136.0651        | 443.6911        | 9.84 ± 0.01      | 88.06          | 8.14           | 82.1 ± 31.2   |
| 20F24358            | 17.0 % |   | 0.0395210       | 1.393387         | 0.0000000        | 54.1827         | 156.1569        | 8.70 ± 0.02      | 92.96          | 3.24           | 16.7 ± 3.4    |
| 20F24361            | 17.0 % | ✓ | 0.0094931       | 0.117503         | 0.0055180        | 56.4550         | 184.0965        | 9.84 ± 0.01      | 98.47          | 3.38           | 206.6 ± 503.0 |
| 20F24362            | 17.0 % | ✓ | 0.0302119       | 0.313926         | 0.0000000        | 75.6057         | 247.3928        | 9.88 ± 0.01      | 96.46          | 4.52           | 103.6 ± 88.1  |
| 20F24364            | 17.0 % | ✓ | 0.0245167       | 0.218359         | 0.0000000        | 59.7056         | 194.6836        | 9.84 ± 0.01      | 96.36          | 3.57           | 117.6 ± 150.8 |
| 20F24365            | 17.0 % | ✓ | 0.0057958       | 0.309707         | 0.0000000        | 60.5320         | 197.8442        | 9.87 ± 0.01      | 99.11          | 3.62           | 84.0 ± 75.3   |
| 20F24367            | 17.0 % |   | 0.0137511       | 0.186143         | 0.0046711        | 35.0123         | 116.7020        | 10.06 ± 0.02     | 96.58          | 2.09           | 80.9 ± 117.6  |
| 20F24368            | 17.0 % | ✓ | 0.0239307       | 0.216345         | 0.0006411        | 32.4680         | 106.6786        | 9.92 ± 0.02      | 93.71          | 1.94           | 64.5 ± 82.5   |
| 20F24370            | 17.0 % | ✓ | 0.0128366       | 0.224694         | 0.0000000        | 33.4277         | 109.0161        | 9.85 ± 0.02      | 96.59          | 2.00           | 64.0 ± 82.2   |
| 20F24371            | 17.0 % | ✓ | 0.0256741       | 0.161872         | 0.0000000        | 101.7606        | 103.3728        | 9.83 ± 0.02      | 93.08          | 1.90           | 84.4 ± 149.4  |
| 20F24373            | 17.0 % |   | 0.0079650       | 0.300182         | 0.0000000        | 27.3745         | 91.7084         | 10.11 ± 0.02     | 97.46          | 1.64           | 39.2 ± 36.7   |
| 20F24374            | 17.0 % | ✓ | 0.0152379       | 0.524941         | 0.0000000        | 54.4851         | 177.4522        | 9.83 ± 0.01      | 97.48          | 3.26           | 44.6 ± 24.4   |
| 20F24376            | 17.0 % |   | 0.3426252       | 0.254669         | 0.0000000        | 69.8924         | 233.4978        | 10.08 ± 0.03     | 69.53          | 4.18           | 118.0 ± 128.8 |
| 20F24377            | 17.0 % |   | 0.0120960       | 19.422034        | 0.0000000        | 6.7373          | 17.9390         | 8.04 ± 0.09      | 83.23          | 0.40           | 0.1 ± 0.0     |
| 20F24379            | 17.0 % |   | 0.0399800       | 0.837769         | 0.0000000        | 95.6149         | 332.0430        | 10.48 ± 0.01     | 96.51          | 5.72           | 49.1 ± 15.6   |
| 20F24380            | 17.0 % |   | 0.0553882       | 0.421429         | 0.0000000        | 54.0013         | 180.0082        | 10.06 ± 0.02     | 91.57          | 3.23           | 55.1 ± 35.3   |
| Σ                   |        |   | 1.3946792       | 53.481103        | 0.0530485        | 1672.2904       | 5445.8483       |                  |                |                |               |

| Information on Analysis                                                                                                                                                                                                                                 | Results                   | 40(r)/39(k) ± 2σ          | Age ± 2σ<br>(Ma)                                                             | MSWD                          | 39Ar(k)<br>(%,n)                                          | K/Ca ± 2σ   |
|---------------------------------------------------------------------------------------------------------------------------------------------------------------------------------------------------------------------------------------------------------|---------------------------|---------------------------|------------------------------------------------------------------------------|-------------------------------|-----------------------------------------------------------|-------------|
| Project = SWENTON (20-01)<br>Sample = EJ-12-21B<br>Material = Sanidine<br>Location = Rhyolite Dome<br>Region = Eastern Oregon<br>Analyst = Dan Miggins<br>Irradiation = 20-OSU-01 (1D7-20)<br>J = 0.00165367 ± 0.00000119<br>FCT-NM = 28.201 ± 0.023 Ma | Age Plateau<br>Error Mean | 3.26528 ± 0.00612 ± 0.19% | 9.86 ± 0.02 ± 0.24%<br>Full External Error ± 0.51<br>Analytical Error ± 0.02 | 30.48<br>0%<br>1.76<br>5.5211 | 68.99<br>15<br>2σ Confidence Limit<br>Error Magnification | 71.8 ± 12.7 |
|                                                                                                                                                                                                                                                         | Total Fusion Age          | 3.25652 ± 0.00106 ± 0.03% | 9.83 ± 0.01 ± 0.15%<br>Full External Error ± 0.51<br>Analytical Error ± 0.00 |                               | 27                                                        | 13.4 ± 0.4  |



| Normal Isochron |        |   | 39(k)/36(a) ± 2σ  | 40(a+r)/36(a) ± 2σ | r.i.   |
|-----------------|--------|---|-------------------|--------------------|--------|
| 20F24337        | 17.0 % |   | 215.48 ± 7.54     | 1342.22 ± 46.65    | 0.9904 |
| 20F24338        | 17.0 % | ✓ | 1819.27 ± 28.58   | 6232.72 ± 97.77    | 0.9985 |
| 20F24340        | 17.0 % |   | 402.58 ± 4.08     | 1508.40 ± 15.21    | 0.9946 |
| 20F24341        | 17.0 % | ✓ | 3072.61 ± 73.86   | 10310.88 ± 247.72  | 0.9993 |
| 20F24343        | 17.0 % | ✓ | 2561.20 ± 38.06   | 8650.48 ± 128.35   | 0.9984 |
| 20F24344        | 17.0 % | ✓ | 2938.20 ± 65.88   | 9988.35 ± 223.81   | 0.9992 |
| 20F24347        | 17.0 % |   | 60.02 ± 0.52      | 582.97 ± 4.91      | 0.9602 |
| 20F24349        | 17.0 % |   | 3724.95 ± 95.10   | 12100.94 ± 308.79  | 0.9994 |
| 20F24350        | 17.0 % |   | 1028.82 ± 28.28   | 2792.00 ± 76.69    | 0.9988 |
| 20F24352        | 17.0 % | ✓ | 5133.01 ± 172.80  | 17024.84 ± 572.94  | 0.9997 |
| 20F24353        | 17.0 % | ✓ | 5423.26 ± 355.99  | 17982.37 ± 1180.26 | 0.9999 |
| 20F24356        | 17.0 % | ✓ | 676.31 ± 5.07     | 2503.93 ± 18.66    | 0.9933 |
| 20F24358        | 17.0 % |   | 1370.98 ± 27.61   | 4249.80 ± 85.50    | 0.9988 |
| 20F24361        | 17.0 % | ✓ | 5946.98 ± 347.77  | 19691.32 ± 1151.39 | 0.9999 |
| 20F24362        | 17.0 % | ✓ | 2502.52 ± 60.25   | 8487.16 ± 204.19   | 0.9993 |
| 20F24364        | 17.0 % | ✓ | 2435.30 ± 67.42   | 8239.41 ± 228.00   | 0.9994 |
| 20F24365        | 17.0 % | ✓ | 10444.10 ± 949.35 | 34434.32 ± 3129.89 | 0.9999 |
| 20F24367        | 17.0 % |   | 2546.15 ± 102.92  | 8785.31 ± 355.01   | 0.9996 |
| 20F24368        | 17.0 % | ✓ | 1356.75 ± 39.13   | 4756.37 ± 137.10   | 0.9992 |
| 20F24370        | 17.0 % | ✓ | 2604.08 ± 103.77  | 8791.13 ± 350.20   | 0.9996 |
| 20F24371        | 17.0 % | ✓ | 1237.07 ± 29.54   | 4324.91 ± 103.19   | 0.9988 |
| 20F24373        | 17.0 % |   | 3436.85 ± 239.24  | 11812.50 ± 822.20  | 0.9999 |
| 20F24374        | 17.0 % | ✓ | 3575.62 ± 129.95  | 11943.97 ± 433.97  | 0.9996 |
| 20F24376        | 17.0 % |   | 203.99 ± 1.20     | 980.06 ± 5.69      | 0.9877 |
| 20F24377        | 17.0 % |   | 556.98 ± 27.59    | 1781.61 ± 88.17    | 0.9973 |
| 20F24379        | 17.0 % |   | 2391.57 ± 47.44   | 8603.78 ± 170.52   | 0.9990 |
| 20F24380        | 17.0 % |   | 974.96 ± 16.02    | 3548.50 ± 58.22    | 0.9982 |

| Results         | 40(a)/36(a) ± 2σ      | 40(r)/39(k) ± 2σ  | Age ± 2σ (Ma)              | MSWD            |
|-----------------|-----------------------|-------------------|----------------------------|-----------------|
| Normal Isochron | 296.36 ± 18.10        | 3.26548 ± 0.00942 | 9.86 ± 0.03                | 27.84           |
| Error Chron     | ± 6.11%               | ± 0.29%           | ± 0.32%                    | 0%              |
|                 |                       |                   | Full External Error ± 0.51 |                 |
|                 |                       |                   | Analytical Error ± 0.03    |                 |
|                 |                       |                   |                            |                 |
| Statistics      | 2σ Confidence Limit   | 1.78              | Convergence                | 0.000001302234  |
|                 | Error Magnification   | 5.2767            | Number of Iterations       | 1               |
|                 | Number of Data Points | 15                | Calculated Line            | Weighted York-2 |

| Inverse Isochron |        |   | 39(k)/40(a+r) ± 2σ   | 36(a)/40(a+r) ± 2σ     | r.i.   |
|------------------|--------|---|----------------------|------------------------|--------|
| 20F24337         | 17.0 % |   | 0.1605417 ±0.0007783 | 0.00074503 ±0.00002589 | 0.0204 |
| 20F24338         | 17.0 % | ✓ | 0.2918902 ±0.0002549 | 0.00016044 ±0.00000252 | 0.0024 |
| 20F24340         | 17.0 % |   | 0.2668957 ±0.0002815 | 0.00066296 ±0.00000669 | 0.0106 |
| 20F24341         | 17.0 % | ✓ | 0.2979965 ±0.0002617 | 0.00009698 ±0.00000233 | 0.0019 |
| 20F24343         | 17.0 % | ✓ | 0.2960759 ±0.0002521 | 0.00011560 ±0.00000172 | 0.0016 |
| 20F24344         | 17.0 % | ✓ | 0.2941630 ±0.0002629 | 0.00010012 ±0.00000224 | 0.0024 |
| 20F24347         | 17.0 % |   | 0.1029550 ±0.0002508 | 0.00171535 ±0.00001444 | 0.0187 |
| 20F24349         | 17.0 % |   | 0.3078233 ±0.0002718 | 0.00008264 ±0.00000211 | 0.0020 |
| 20F24350         | 17.0 % |   | 0.3684901 ±0.0004894 | 0.00035817 ±0.00000984 | 0.0113 |
| 20F24352         | 17.0 % | ✓ | 0.3015010 ±0.0002662 | 0.00005874 ±0.00000198 | 0.0013 |
| 20F24353         | 17.0 % | ✓ | 0.3015878 ±0.0003179 | 0.00005561 ±0.00000365 | 0.0019 |
| 20F24356         | 17.0 % | ✓ | 0.2701004 ±0.0002338 | 0.00039937 ±0.00000298 | 0.0031 |
| 20F24358         | 17.0 % |   | 0.3226000 ±0.0003164 | 0.00023531 ±0.00000473 | 0.0047 |
| 20F24361         | 17.0 % | ✓ | 0.3020100 ±0.0002945 | 0.00005078 ±0.00000297 | 0.0017 |
| 20F24362         | 17.0 % | ✓ | 0.2948591 ±0.0002741 | 0.00011783 ±0.00000283 | 0.0030 |
| 20F24364         | 17.0 % | ✓ | 0.2955673 ±0.0002805 | 0.00012137 ±0.00000336 | 0.0029 |
| 20F24365         | 17.0 % | ✓ | 0.3033049 ±0.0002871 | 0.00002904 ±0.00000264 | 0.0010 |
| 20F24367         | 17.0 % |   | 0.2898187 ±0.0003270 | 0.00011383 ±0.00000460 | 0.0042 |
| 20F24368         | 17.0 % | ✓ | 0.2852488 ±0.0003242 | 0.00021024 ±0.00000606 | 0.0066 |
| 20F24370         | 17.0 % | ✓ | 0.2962170 ±0.0003455 | 0.00011375 ±0.00000453 | 0.0043 |
| 20F24371         | 17.0 % | ✓ | 0.2860329 ±0.0003290 | 0.00023122 ±0.00000552 | 0.0068 |
| 20F24373         | 17.0 % |   | 0.2909505 ±0.0003499 | 0.00008466 ±0.00000589 | 0.0030 |
| 20F24374         | 17.0 % | ✓ | 0.2993662 ±0.0002946 | 0.00008372 ±0.00000304 | 0.0028 |
| 20F24376         | 17.0 % |   | 0.2081421 ±0.0001910 | 0.00102035 ±0.00000593 | 0.0075 |
| 20F24377         | 17.0 % |   | 0.3126280 ±0.0011471 | 0.00056129 ±0.00002778 | 0.0270 |
| 20F24379         | 17.0 % |   | 0.2779669 ±0.0002450 | 0.00011623 ±0.00000230 | 0.0019 |
| 20F24380         | 17.0 % |   | 0.2747529 ±0.0002687 | 0.00028181 ±0.00000462 | 0.0055 |

| Results          | 40(a)/36(a) ± 2σ      | 40(r)/39(k) ± 2σ | Age ± 2σ (Ma)             | MSWD            |
|------------------|-----------------------|------------------|---------------------------|-----------------|
| Inverse Isochron | 298.44 ±19.86         | 3.26539 ±0.01036 | 9.86 ±0.03                | 33.23           |
| Error Chron      | ±6.66%                | ±0.32%           | ±0.35%                    | 0%              |
|                  |                       |                  | Full External Error ±0.51 |                 |
|                  |                       |                  | Analytical Error ±0.03    |                 |
|                  |                       |                  |                           |                 |
| Statistics       | 2σ Confidence Limit   | 1.78             | Convergence               | 0.0000021204    |
|                  | Error Magnification   | 5.7647           | Number of Iterations      | 1               |
|                  | Number of Data Points | 15               | Calculated Line           | Weighted York-2 |
|                  | Spreading Factor      | 10.8%            |                           |                 |

| Degassing Patterns |        | 36Ar(a)<br>[fA] | %1σ  | 36Ar(c)<br>[fA] | %1σ  | 36Ar(ca)<br>[fA] | %1σ       | 36Ar(cl)<br>[fA] | %1σ    | 37Ar(ca)<br>[fA] | %1σ    | 38Ar(a)<br>[fA] | %1σ  | 38Ar(c)<br>[fA] | %1σ  | 38Ar(k)<br>[fA] | %1σ  | 38Ar(ca)<br>[fA] | %1σ       | 38Ar(cl)<br>[fA] | %1σ    | 39Ar(k)<br>[fA] | %1σ       | 39Ar(ca)<br>[fA] | %1σ    | 40Ar(r)<br>[fA] | %1σ  | 40Ar(a)<br>[fA] | %1σ  | 40Ar(c)<br>[fA] | %1σ       | 40Ar(k)<br>[fA] | %1σ  |
|--------------------|--------|-----------------|------|-----------------|------|------------------|-----------|------------------|--------|------------------|--------|-----------------|------|-----------------|------|-----------------|------|------------------|-----------|------------------|--------|-----------------|-----------|------------------|--------|-----------------|------|-----------------|------|-----------------|-----------|-----------------|------|
| 20F24337           | 17.0 % | 0.0185832       | 1.74 | 0.0000000       | 0.00 | 0.0000174        | 220.18    | 0.0000000        | 0.00   | 0.064409         | 220.18 | 0.0035029       | 1.74 | 0.0000000       | 0.00 | 0.048361        | 0.24 | 0.0000116        | 220.39    | 0.0000000        | 0.00   | 4.0044          | 0.22      | 0.0000414        | 220.18 | 19.3946         | 0.51 | 5.54820         | 1.74 | 0.0000000       | 0.00      | 0.0024306       | 9.65 |
| 20F24338           | 17.0 % | ✓ 0.0580035     | 0.78 | 0.0000000       | 0.00 | 0.0001436        | 26.20     | 0.0000000        | 0.00   | 0.531155         | 26.20  | 0.0109337       | 0.80 | 0.0000000       | 0.00 | 1.274413        | 0.10 | 0.0000956        | 27.92     | 0.0000000        | 0.00   | 105.5240        | 0.04      | 0.0003413        | 26.22  | 344.2021        | 0.04 | 17.31751        | 0.79 | 0.0000000       | 0.00      | 0.0640531       | 9.65 |
| 20F24340           | 17.0 % | 0.1033203       | 0.50 | 0.0000000       | 0.00 | 0.0020035        | 1.86      | 0.0000003        | 859.98 | 7.412258         | 1.86   | 0.0194759       | 0.53 | 0.0000000       | 0.00 | 0.502345        | 0.10 | 0.0013342        | 9.81      | 0.0010989        | 859.98 | 41.5951         | 0.05      | 0.0047624        | 2.07   | 125.0007        | 0.13 | 30.84730        | 0.51 | 0.0000000       | 0.00      | 0.0252483       | 9.65 |
| 20F24341           | 17.0 % | ✓ 0.0343896     | 1.20 | 0.0000000       | 0.00 | 0.0001020        | 37.28     | 0.0000000        | #####  | 0.377203         | 37.28  | 0.0064824       | 1.21 | 0.0000000       | 0.00 | 1.276126        | 0.10 | 0.0000679        | 38.50     | 0.0000916        | #####  | 105.6658        | 0.04      | 0.0002424        | 37.29  | 344.3201        | 0.04 | 10.26737        | 1.21 | 0.0000000       | 0.00      | 0.0641391       | 9.65 |
| 20F24343           | 17.0 % | ✓ 0.0647028     | 0.74 | 0.0000000       | 0.00 | 0.0002113        | 17.57     | 0.0000030        | 86.20  | 0.781584         | 17.57  | 0.0121965       | 0.76 | 0.0000000       | 0.00 | 2.001360        | 0.10 | 0.0001407        | 20.04     | 0.0127214        | 86.20  | 165.7167        | 0.04      | 0.0005022        | 17.60  | 540.3925        | 0.03 | 19.31767        | 0.75 | 0.0000000       | 0.00      | 0.1005900       | 9.65 |
| 20F24344           | 17.0 % | ✓ 0.0319104     | 1.12 | 0.0000000       | 0.00 | 0.0001646        | 22.23     | 0.0000038        | 56.59  | 0.608900         | 22.23  | 0.0060151       | 1.13 | 0.0000000       | 0.00 | 1.132331        | 0.10 | 0.0001096        | 24.22     | 0.0164458        | 56.60  | 93.7593         | 0.04      | 0.0003912        | 22.25  | 309.2053        | 0.04 | 9.52717         | 1.13 | 0.0000000       | 0.00      | 0.0569119       | 9.65 |
| 20F24347           | 17.0 % | 0.1450870       | 0.42 | 0.0000000       | 0.00 | 0.0040080        | 0.96      | 0.0000000        | #####  | 16.307940        | 0.95   | 0.0273489       | 0.45 | 0.0000000       | 0.00 | 0.105168        | 0.15 | 0.0029354        | 9.68      | 0.0000236        | #####  | 8.7081          | 0.12      | 0.0104779        | 1.32   | 41.2645         | 0.46 | 43.31718        | 0.43 | 0.0000000       | 0.00      | 0.0052858       | 9.65 |
| 20F24349           | 17.0 % | 0.0255377       | 1.28 | 0.0000000       | 0.00 | 0.0001430        | 27.05     | 0.0000001        | #####  | 0.529017         | 27.05  | 0.0048139       | 1.29 | 0.0000000       | 0.00 | 1.148846        | 0.10 | 0.0000952        | 28.71     | 0.0005057        | #####  | 95.1268         | 0.04      | 0.0003399        | 27.06  | 301.4061        | 0.03 | 7.62454         | 1.28 | 0.0000000       | 0.00      | 0.0577420       | 9.65 |
| 20F24350           | 17.0 % | 0.0255918       | 1.37 | 0.0000000       | 0.00 | 0.0002428        | 15.50     | 0.0000026        | 80.34  | 0.898134         | 15.49  | 0.0048241       | 1.38 | 0.0000000       | 0.00 | 0.317981        | 0.11 | 0.0001617        | 18.24     | 0.0113314        | 80.35  | 26.3295         | 0.06      | 0.0005771        | 15.52  | 63.8116         | 0.17 | 7.64069         | 1.38 | 0.0000000       | 0.00      | 0.0159820       | 9.65 |
| 20F24352           | 17.0 % | ✓ 0.0197939     | 1.68 | 0.0000000       | 0.00 | 0.0000595        | 63.08     | 0.0000000        | 0.00   | 0.220125         | 63.08  | 0.0037311       | 1.69 | 0.0000000       | 0.00 | 1.227048        | 0.10 | 0.0000396        | 63.81     | 0.0000000        | 0.00   | 101.6020        | 0.04      | 0.0001414        | 63.09  | 331.0777        | 0.03 | 5.90966         | 1.69 | 0.0000000       | 0.00      | 0.0616724       | 9.65 |
| 20F24353           | 17.0 % | ✓ 0.0075487     | 3.28 | 0.0000000       | 0.00 | 0.0000363        | 106.43    | 0.0000000        | 0.00   | 0.134349         | 106.43 | 0.0014229       | 3.29 | 0.0000000       | 0.00 | 0.494416        | 0.10 | 0.0000242        | 106.86    | 0.0000000        | 0.00   | 40.9387         | 0.05      | 0.0000863        | 106.43 | 133.4901        | 0.06 | 2.25374         | 3.28 | 0.0000000       | 0.00      | 0.0248498       | 9.65 |
| 20F24356           | 17.0 % | ✓ 0.2011870     | 0.37 | 0.0000000       | 0.00 | 0.0001927        | 19.03     | 0.0000000        | 0.00   | 0.713071         | 19.02  | 0.0379237       | 0.41 | 0.0000000       | 0.00 | 1.643258        | 0.10 | 0.0001284        | 21.32     | 0.0000000        | 0.00   | 136.0651        | 0.04      | 0.0004581        | 19.05  | 443.6911        | 0.05 | 60.06638        | 0.39 | 0.0000000       | 0.00      | 0.0825915       | 9.65 |
| 20F24358           | 17.0 % | 0.0395210       | 1.01 | 0.0000000       | 0.00 | 0.0003766        | 10.13     | 0.0000000        | 0.00   | 1.393387         | 10.13  | 0.0074497       | 1.02 | 0.0000000       | 0.00 | 0.654365        | 0.10 | 0.0002508        | 13.98     | 0.0000000        | 0.00   | 54.1827         | 0.05      | 0.0008953        | 10.17  | 156.1569        | 0.08 | 11.79940        | 1.01 | 0.0000000       | 0.00      | 0.0328889       | 9.65 |
| 20F24361           | 17.0 % | ✓ 0.0094931     | 2.92 | 0.0000000       | 0.00 | 0.0000318        | 121.72    | 0.0000013        | 160.91 | 0.117503         | 121.72 | 0.0017894       | 2.93 | 0.0000000       | 0.00 | 0.681807        | 0.10 | 0.0000212        | 122.10    | 0.0055180        | 160.92 | 56.4550         | 0.05      | 0.0000755        | 121.73 | 184.0965        | 0.05 | 2.83425         | 2.93 | 0.0000000       | 0.00      | 0.0342682       | 9.65 |
| 20F24362           | 17.0 % | ✓ 0.0302119     | 1.20 | 0.0000000       | 0.00 | 0.0000849        | 42.52     | 0.0000000        | 0.00   | 0.313926         | 42.52  | 0.0056949       | 1.21 | 0.0000000       | 0.00 | 0.913090        | 0.10 | 0.0000565        | 43.59     | 0.0000000        | 0.00   | 75.6057         | 0.04      | 0.0002017        | 42.52  | 247.3928        | 0.05 | 9.02005         | 1.21 | 0.0000000       | 0.00      | 0.0458926       | 9.65 |
| 20F24364           | 17.0 % | ✓ 0.0245167     | 1.38 | 0.0000000       | 0.00 | 0.0000590        | 64.12     | 0.0000000        | 0.00   | 0.218359         | 64.12  | 0.0046214       | 1.39 | 0.0000000       | 0.00 | 0.721064        | 0.10 | 0.0000393        | 64.84     | 0.0000000        | 0.00   | 59.7056         | 0.05      | 0.0001403        | 64.12  | 194.6836        | 0.05 | 7.31971         | 1.39 | 0.0000000       | 0.00      | 0.0362413       | 9.65 |
| 20F24365           | 17.0 % | ✓ 0.0057958     | 4.54 | 0.0000000       | 0.00 | 0.0000837        | 44.83     | 0.0000000        | 0.00   | 0.309707         | 44.83  | 0.0010925       | 4.55 | 0.0000000       | 0.00 | 0.731044        | 0.10 | 0.0000557        | 45.85     | 0.0000000        | 0.00   | 60.5320         | 0.04      | 0.0001990        | 44.84  | 197.8442        | 0.04 | 1.73040         | 4.55 | 0.0000000       | 0.00      | 0.0367429       | 9.65 |
| 20F24367           | 17.0 % | 0.0137511       | 2.02 | 0.0000000       | 0.00 | 0.0000503        | 72.69     | 0.0000011        | 186.19 | 0.186143         | 72.69  | 0.0025921       | 2.03 | 0.0000000       | 0.00 | 0.422843        | 0.10 | 0.0000335        | 73.32     | 0.0046711        | 186.19 | 35.0123         | 0.05      | 0.0001196        | 72.69  | 116.7020        | 0.07 | 4.10552         | 2.02 | 0.0000000       | 0.00      | 0.0212525       | 9.65 |
| 20F24368           | 17.0 % | ✓ 0.0239307     | 1.44 | 0.0000000       | 0.00 | 0.0000585        | 63.88     | 0.0000001        | #####  | 0.216345         | 63.88  | 0.0045109       | 1.45 | 0.0000000       | 0.00 | 0.392116        | 0.10 | 0.0000389        | 64.61     | 0.0006411        | #####  | 32.4680         | 0.05      | 0.0001390        | 63.89  | 106.6786        | 0.10 | 7.14475         | 1.44 | 0.0000000       | 0.00      | 0.0197081       | 9.65 |
| 20F24370           | 17.0 % | ✓ 0.0128366     | 1.99 | 0.0000000       | 0.00 | 0.0000607        | 64.25     | 0.0000000        | 0.00   | 0.224694         | 64.25  | 0.0024197       | 2.00 | 0.0000000       | 0.00 | 0.403706        | 0.10 | 0.0000404        | 64.97     | 0.0000000        | 0.00   | 33.4277         | 0.05      | 0.0001444        | 64.26  | 109.0161        | 0.07 | 3.83251         | 1.99 | 0.0000000       | 0.00      | 0.0202906       | 9.65 |
| 20F24371           | 17.0 % | ✓ 0.0256741     | 1.19 | 0.0000000       | 0.00 | 0.0000438        | 88.51     | 0.0000000        | 0.00   | 0.161872         | 88.51  | 0.0048396       | 1.20 | 0.0000000       | 0.00 | 0.383572        | 0.10 | 0.0000291        | 89.03     | 0.0000000        | 0.00   | 31.7606         | 0.05      | 0.0001040        | 88.52  | 103.3728        | 0.09 | 7.66525         | 1.20 | 0.0000000       | 0.00      | 0.0192787       | 9.65 |
| 20F24373           | 17.0 % | 0.0079650       | 3.48 | 0.0000000       | 0.00 | 0.0000811        | 46.80     | 0.0000000        | 0.00   | 0.300182         | 46.80  | 0.0015014       | 3.48 | 0.0000000       | 0.00 | 0.330602        | 0.11 | 0.0000540        | 47.78     | 0.0000000        | 0.00   | 27.3745         | 0.05      | 0.0001929        | 46.81  | 91.7084         | 0.09 | 2.37803         | 3.48 | 0.0000000       | 0.00      | 0.0166163       | 9.65 |
| 20F24374           | 17.0 % | ✓ 0.0152379     | 1.82 | 0.0000000       | 0.00 | 0.0001419        | 27.32     | 0.0000000        | 0.00   | 0.524941         | 27.32  | 0.0028724       | 1.82 | 0.0000000       | 0.00 | 0.658017        | 0.10 | 0.0000945        | 28.96     | 0.0000000        | 0.00   | 54.4851         | 0.05      | 0.0003373        | 27.33  | 177.4522        | 0.05 | 4.54944         | 1.82 | 0.0000000       | 0.00      | 0.0330725       | 9.65 |
| 20F24376           | 17.0 % | 0.3426252       | 0.29 | 0.0000000       | 0.00 | 0.0000688        | 54.56     | 0.0000000        | 0.00   | 0.254669         | 54.56  | 0.0645848       | 0.33 | 0.0000000       | 0.00 | 0.844091        | 0.10 | 0.0000458        | 55.41     | 0.0000000        | 0.00   | 69.8924         | 0.04      | 0.0001636        | 54.57  | 233.4978        | 0.14 | 102.29417       | 0.31 | 0.0000000       | 0.00      | 0.0424247       | 9.65 |
| 20F24377           | 17.0 % | 0.0120960       | 2.47 | 0.0000000       | 0.00 | 0.0052498        | 0.90      | 0.0000000        | 0.00   | 19.422034        | 0.88   | 0.0022801       | 2.48 | 0.0000000       | 0.00 | 0.081366        | 0.17 | 0.0034960        | 9.67      | 0.0000000        | 0.00   | 6.7373          | 0.15      | 0.0124787        | 1.27   | 17.9390         | 0.52 | 3.61139         | 2.47 | 0.0000000       | 0.00      | 0.0040895       | 9.65 |
| 20F24379           | 17.0 % | 0.0399800       | 0.99 | 0.0000000       | 0.00 | 0.0002264        | 15.87     | 0.0000000        | 0.00   | 0.837769         | 15.87  | 0.0075362       | 1.00 | 0.0000000       | 0.00 | 1.154741        | 0.10 | 0.0001508        | 18.56     | 0.0000000        | 0.00   | 95.6149         | 0.04      | 0.0005383        | 15.90  | 332.0430        | 0.04 | 11.93644        | 1.00 | 0.0000000       | 0.00      | 0.0580382       | 9.65 |
| 20F24380           | 17.0 % | 0.0553882       | 0.82 | 0.0000000       | 0.00 | 0.0001139        | 32.02     | 0.0000000        | 0.00   | 0.421429         | 32.02  | 0.0104407       | 0.84 | 0.0000000       | 0.00 | 0.652174        | 0.10 | 0.0000759        | 33.44     | 0.0000000        | 0.00   | 54.0013         | 0.05      | 0.0002708        | 32.03  | 180.0082        | 0.08 | 16.53670        | 0.83 | 0.0000000       | 0.00      | 0.0327788       | 9.65 |
| Σ                  |        | 1.3946792       | 0.16 | 0.0000000       | 0.00 | 0.0144559        | 1.37      | 0.0000124        | 56.63  | 53.481103        | 1.37   | 0.2628970       | 0.17 | 0.0000000       | 0.00 | 20.196251       | 0.02 | 0.0096266        | 4.97      | 0.0530485        | 56.63  | 1672.2904       | 0.01      | 0.0343616        | 1.45   | 5445.8483       | 0.01 | 416.39544       | 0.16 | 0.0000000       | 0.00      | 1.0150803       | 2.20 |
| Σ                  |        |                 |      |                 |      |                  | 1.4091476 |                  | 0.16   | 53.481103        | 1.37   |                 |      |                 |      |                 |      |                  | 20.521823 | 0.15             |        |                 | 1672.3247 | 0.01             |        |                 |      |                 |      |                 | 5863.2588 | 0.02            |      |

| Additional Parameters |        |   | 40Ar/39Ar | 1σ       | 37Ar/39Ar | 1σ       | 36Ar/39Ar | 1σ       | Time (days) | 37Ar (decay) | 39Ar (decay) | 40Ar (moles) |
|-----------------------|--------|---|-----------|----------|-----------|----------|-----------|----------|-------------|--------------|--------------|--------------|
| 20F24337              | 17.0 % |   | 6.229453  | 0.015098 | 0.016085  | 0.035416 | 0.004645  | 0.000081 | 143.507     | 17.064788    | 1.00101398   | 8.831E-13    |
| 20F24338              | 17.0 % | ✓ | 3.426542  | 0.001495 | 0.005033  | 0.001319 | 0.000551  | 0.000004 | 143.512     | 17.066661    | 1.00101402   | 1.280E-11    |
| 20F24340              | 17.0 % |   | 3.746961  | 0.001975 | 0.178180  | 0.003307 | 0.002532  | 0.000013 | 143.525     | 17.070875    | 1.00101411   | 5.518E-12    |
| 20F24341              | 17.0 % | ✓ | 3.356343  | 0.001473 | 0.003570  | 0.001331 | 0.000326  | 0.000004 | 143.531     | 17.072748    | 1.00101415   | 1.255E-11    |
| 20F24343              | 17.0 % | ✓ | 3.378109  | 0.001437 | 0.004716  | 0.000829 | 0.000392  | 0.000003 | 143.542     | 17.076730    | 1.00101423   | 1.982E-11    |
| 20F24344              | 17.0 % | ✓ | 3.400069  | 0.001518 | 0.006494  | 0.001444 | 0.000342  | 0.000004 | 143.549     | 17.078838    | 1.00101428   | 1.129E-11    |
| 20F24347              | 17.0 % |   | 9.701914  | 0.011801 | 1.870481  | 0.017869 | 0.017147  | 0.000073 | 143.567     | 17.084930    | 1.00101440   | 2.994E-12    |
| 20F24349              | 17.0 % |   | 3.249213  | 0.001433 | 0.005561  | 0.001504 | 0.000270  | 0.000003 | 143.578     | 17.088914    | 1.00101449   | 1.094E-11    |
| 20F24350              | 17.0 % |   | 2.714325  | 0.001801 | 0.034111  | 0.005285 | 0.000981  | 0.000013 | 143.584     | 17.090790    | 1.00101453   | 2.530E-12    |
| 20F24352              | 17.0 % | ✓ | 3.317341  | 0.001463 | 0.002167  | 0.001367 | 0.000195  | 0.000003 | 143.596     | 17.094775    | 1.00101461   | 1.193E-11    |
| 20F24353              | 17.0 % | ✓ | 3.316384  | 0.001747 | 0.003282  | 0.003493 | 0.000185  | 0.000006 | 143.602     | 17.096886    | 1.00101465   | 4.806E-12    |
| 20F24356              | 17.0 % | ✓ | 3.702921  | 0.001602 | 0.005241  | 0.000997 | 0.001480  | 0.000006 | 143.620     | 17.102984    | 1.00101478   | 1.784E-11    |
| 20F24358              | 17.0 % |   | 3.100370  | 0.001519 | 0.025716  | 0.002605 | 0.000736  | 0.000007 | 143.632     | 17.106973    | 1.00101486   | 5.947E-12    |
| 20F24361              | 17.0 % | ✓ | 3.311751  | 0.001614 | 0.002081  | 0.002533 | 0.000169  | 0.000005 | 143.650     | 17.113075    | 1.00101499   | 6.619E-12    |
| 20F24362              | 17.0 % | ✓ | 3.392048  | 0.001576 | 0.004152  | 0.001765 | 0.000401  | 0.000005 | 143.656     | 17.114953    | 1.00101503   | 9.079E-12    |
| 20F24364              | 17.0 % | ✓ | 3.383924  | 0.001605 | 0.003657  | 0.002345 | 0.000412  | 0.000006 | 143.667     | 17.118944    | 1.00101511   | 7.152E-12    |
| 20F24365              | 17.0 % | ✓ | 3.297608  | 0.001559 | 0.005116  | 0.002294 | 0.000097  | 0.000004 | 143.674     | 17.121058    | 1.00101516   | 7.066E-12    |
| 20F24367              | 17.0 % |   | 3.451028  | 0.001946 | 0.005316  | 0.003864 | 0.000394  | 0.000008 | 143.685     | 17.125051    | 1.00101524   | 4.277E-12    |
| 20F24368              | 17.0 % | ✓ | 3.506304  | 0.001992 | 0.006663  | 0.004257 | 0.000739  | 0.000011 | 143.692     | 17.127165    | 1.00101529   | 4.030E-12    |
| 20F24370              | 17.0 % | ✓ | 3.376496  | 0.001968 | 0.006722  | 0.004319 | 0.000386  | 0.000008 | 143.703     | 17.131159    | 1.00101537   | 3.996E-12    |
| 20F24371              | 17.0 % | ✓ | 3.496697  | 0.002010 | 0.005097  | 0.004511 | 0.000810  | 0.000010 | 143.709     | 17.133039    | 1.00101541   | 3.931E-12    |
| 20F24373              | 17.0 % |   | 3.437593  | 0.002066 | 0.010966  | 0.005132 | 0.000294  | 0.000010 | 143.722     | 17.137270    | 1.00101550   | 3.331E-12    |
| 20F24374              | 17.0 % | ✓ | 3.340977  | 0.001643 | 0.009635  | 0.002632 | 0.000282  | 0.000005 | 143.727     | 17.139150    | 1.00101554   | 6.444E-12    |
| 20F24376              | 17.0 % |   | 4.805005  | 0.002203 | 0.003644  | 0.001988 | 0.004903  | 0.000014 | 143.739     | 17.143147    | 1.00101562   | 1.189E-11    |
| 20F24377              | 17.0 % |   | 3.193382  | 0.005850 | 2.877448  | 0.025640 | 0.002570  | 0.000044 | 143.745     | 17.145264    | 1.00101566   | 7.630E-13    |
| 20F24379              | 17.0 % |   | 3.598137  | 0.001585 | 0.008762  | 0.001391 | 0.000421  | 0.000004 | 143.757     | 17.149262    | 1.00101575   | 1.218E-11    |
| 20F24380              | 17.0 % |   | 3.640222  | 0.001779 | 0.007804  | 0.002499 | 0.001028  | 0.000008 | 143.763     | 17.151379    | 1.00101579   | 6.959E-12    |

| Procedure<br>Blanks |        | 36Ar ± 1σ (SE)<br>[fA] | 37Ar ± 1σ (SE)<br>[fA] | 38Ar ± 1σ (SE)<br>[fA] | 39Ar ± 1σ (SE)<br>[fA] | 40Ar ± 1σ (SE)<br>[fA] |
|---------------------|--------|------------------------|------------------------|------------------------|------------------------|------------------------|
| 20F24337            | 17.0 % | 0.0046953 ± 0.0001822  | 0.0128161 ± 0.0062347  | 0.0024456 ± 0.0071244  | 0.0126469 ± 0.0060184  | 1.1465155 ± 0.0162592  |
| 20F24338            | 17.0 % | 0.0046953 ± 0.0001822  | 0.0128161 ± 0.0062347  | 0.0024456 ± 0.0071244  | 0.0126469 ± 0.0060184  | 1.1465155 ± 0.0162592  |
| 20F24340            | 17.0 % | 0.0051804 ± 0.0001882  | 0.0257454 ± 0.0054170  | 0.0134858 ± 0.0066273  | 0.0158484 ± 0.0066602  | 1.0369783 ± 0.0157735  |
| 20F24341            | 17.0 % | 0.0051804 ± 0.0001882  | 0.0257454 ± 0.0054170  | 0.0134858 ± 0.0066273  | 0.0158484 ± 0.0066602  | 1.0369783 ± 0.0157735  |
| 20F24343            | 17.0 % | 0.0042311 ± 0.0001542  | 0.0192645 ± 0.0057873  | 0.0145373 ± 0.0061349  | 0.0140171 ± 0.0061090  | 0.9661140 ± 0.0161930  |
| 20F24344            | 17.0 % | 0.0042311 ± 0.0001542  | 0.0192645 ± 0.0057873  | 0.0145373 ± 0.0061349  | 0.0140171 ± 0.0061090  | 0.9661140 ± 0.0161930  |
| 20F24347            | 17.0 % | 0.0039234 ± 0.0001577  | 0.0197470 ± 0.0058848  | 0.0036581 ± 0.0063697  | 0.0064677 ± 0.0059604  | 1.0321581 ± 0.0151579  |
| 20F24349            | 17.0 % | 0.0049542 ± 0.0001470  | 0.0126457 ± 0.0057735  | 0.0141630 ± 0.0060484  | 0.0167842 ± 0.0058851  | 1.0277911 ± 0.0153487  |
| 20F24350            | 17.0 % | 0.0049542 ± 0.0001470  | 0.0126457 ± 0.0057735  | 0.0141630 ± 0.0060484  | 0.0167842 ± 0.0058851  | 1.0277911 ± 0.0153487  |
| 20F24352            | 17.0 % | 0.0043921 ± 0.0001502  | 0.0172070 ± 0.0060374  | 0.0104461 ± 0.0067478  | 0.0179329 ± 0.0066231  | 1.0476278 ± 0.0148815  |
| 20F24353            | 17.0 % | 0.0043921 ± 0.0001502  | 0.0172070 ± 0.0060374  | 0.0104461 ± 0.0067478  | 0.0179329 ± 0.0066231  | 1.0476278 ± 0.0148815  |
| 20F24356            | 17.0 % | 0.0048215 ± 0.0001345  | 0.0238864 ± 0.0059427  | 0.0066199 ± 0.0063572  | 0.0290622 ± 0.0064256  | 1.0557522 ± 0.0149447  |
| 20F24358            | 17.0 % | 0.0040749 ± 0.0001567  | 0.0270036 ± 0.0055987  | 0.0013508 ± 0.0064263  | 0.0009460 ± 0.0061446  | 0.9584636 ± 0.0141133  |
| 20F24361            | 17.0 % | 0.0042311 ± 0.0001542  | 0.0192645 ± 0.0057873  | 0.0145373 ± 0.0061349  | 0.0140171 ± 0.0061090  | 0.9661140 ± 0.0161930  |
| 20F24362            | 17.0 % | 0.0042311 ± 0.0001542  | 0.0192645 ± 0.0057873  | 0.0145373 ± 0.0061349  | 0.0140171 ± 0.0061090  | 0.9661140 ± 0.0161930  |
| 20F24364            | 17.0 % | 0.0039234 ± 0.0001577  | 0.0197470 ± 0.0058848  | 0.0036581 ± 0.0063697  | 0.0064677 ± 0.0059604  | 1.0321581 ± 0.0151579  |
| 20F24365            | 17.0 % | 0.0039234 ± 0.0001577  | 0.0197470 ± 0.0058848  | 0.0036581 ± 0.0063697  | 0.0064677 ± 0.0059604  | 1.0321581 ± 0.0151579  |
| 20F24367            | 17.0 % | 0.0049542 ± 0.0001470  | 0.0126457 ± 0.0057735  | 0.0141630 ± 0.0060484  | 0.0167842 ± 0.0058851  | 1.0277911 ± 0.0153487  |
| 20F24368            | 17.0 % | 0.0049542 ± 0.0001470  | 0.0126457 ± 0.0057735  | 0.0141630 ± 0.0060484  | 0.0167842 ± 0.0058851  | 1.0277911 ± 0.0153487  |
| 20F24370            | 17.0 % | 0.0043921 ± 0.0001502  | 0.0172070 ± 0.0060374  | 0.0104461 ± 0.0067478  | 0.0179329 ± 0.0066231  | 1.0476278 ± 0.0148815  |
| 20F24371            | 17.0 % | 0.0043921 ± 0.0001502  | 0.0172070 ± 0.0060374  | 0.0104461 ± 0.0067478  | 0.0179329 ± 0.0066231  | 1.0476278 ± 0.0148815  |
| 20F24373            | 17.0 % | 0.0048215 ± 0.0001345  | 0.0238864 ± 0.0059427  | 0.0066199 ± 0.0063572  | 0.0290622 ± 0.0064256  | 1.0557522 ± 0.0149447  |
| 20F24374            | 17.0 % | 0.0048215 ± 0.0001345  | 0.0238864 ± 0.0059427  | 0.0066199 ± 0.0063572  | 0.0290622 ± 0.0064256  | 1.0557522 ± 0.0149447  |
| 20F24376            | 17.0 % | 0.0058533 ± 0.0001652  | 0.0135420 ± 0.0058628  | 0.0011246 ± 0.0063730  | 0.0133599 ± 0.0064014  | 1.4484951 ± 0.0161359  |
| 20F24377            | 17.0 % | 0.0058533 ± 0.0001652  | 0.0135420 ± 0.0058628  | 0.0011246 ± 0.0063730  | 0.0133599 ± 0.0064014  | 1.4484951 ± 0.0161359  |
| 20F24379            | 17.0 % | 0.0040749 ± 0.0001567  | 0.0270036 ± 0.0055987  | 0.0013508 ± 0.0064263  | 0.0009460 ± 0.0061446  | 0.9584636 ± 0.0141133  |
| 20F24380            | 17.0 % | 0.0040749 ± 0.0001567  | 0.0270036 ± 0.0055987  | 0.0013508 ± 0.0064263  | 0.0009460 ± 0.0061446  | 0.9584636 ± 0.0141133  |

| Intercept Values |        | 36Ar ±1σ (SE)<br>[fA] |            | r2     | Regression<br>(type,n) | 37Ar ±1σ (SE)<br>[fA] |            | r2     | Regression<br>(type,n) | 38Ar ±1σ (SE)<br>[fA] |            | r2     | Regression<br>(type,n) | 39Ar ±1σ (SE)<br>[fA] |           | r2     | Regression<br>(type,n) | 40Ar ±1σ (SE)<br>[fA] |          | r2     | Regression<br>(type,n) |
|------------------|--------|-----------------------|------------|--------|------------------------|-----------------------|------------|--------|------------------------|-----------------------|------------|--------|------------------------|-----------------------|-----------|--------|------------------------|-----------------------|----------|--------|------------------------|
| 20F24337         | 17.0 % | 0.0229002             | ±0.0002532 | 0.7526 | EXP 149 of150          | 0.0090404             | ±0.0054993 | 0.0117 | EXP 150 of150          | 0.0538925             | ±0.0063002 | 0.0077 | EXP 149 of150          | 4.013448              | ±0.006435 | 0.9495 | EXP 150 of150          | 26.09173              | ±0.01647 | 0.9870 | EXP 150 of150          |
| 20F24338         | 17.0 % | 0.0616052             | ±0.0003939 | 0.4833 | EXP 150 of150          | 0.0183170             | ±0.0052587 | 0.0204 | EXP 147 of150          | 1.2794475             | ±0.0067767 | 0.8028 | EXP 150 of150          | 105.442195            | ±0.013099 | 0.9999 | EXP 148 of150          | 362.73015             | ±0.02793 | 0.9999 | EXP 148 of150          |
| 20F24340         | 17.0 % | 0.1082636             | ±0.0004418 | 0.4205 | EXP 148 of150          | 0.4086090             | ±0.0056770 | 0.3854 | EXP 150 of150          | 0.5108883             | ±0.0066038 | 0.3970 | EXP 150 of150          | 41.578383             | ±0.010210 | 0.9994 | EXP 147 of150          | 156.91020             | ±0.02080 | 0.9996 | EXP 147 of150          |
| 20F24341         | 17.0 % | 0.0389382             | ±0.0003517 | 0.7994 | EXP 150 of150          | 0.0036439             | ±0.0062080 | 0.0015 | EXP 150 of150          | 1.2695769             | ±0.0073221 | 0.7463 | EXP 150 of150          | 105.586957            | ±0.012985 | 0.9999 | EXP 146 of150          | 355.68853             | ±0.03125 | 0.9999 | EXP 150 of150          |
| 20F24343         | 17.0 % | 0.0677670             | ±0.0004302 | 0.6716 | EXP 148 of150          | 0.0265202             | ±0.0055857 | 0.0001 | EXP 149 of150          | 2.0123474             | ±0.0074476 | 0.8867 | EXP 150 of150          | 165.582290            | ±0.017379 | 0.9999 | EXP 150 of150          | 560.77690             | ±0.03565 | 0.9999 | EXP 150 of150          |
| 20F24344         | 17.0 % | 0.0356274             | ±0.0003079 | 0.8623 | EXP 150 of150          | 0.0164001             | ±0.0054156 | 0.0234 | EXP 149 of150          | 1.1406295             | ±0.0063413 | 0.7684 | EXP 150 of150          | 93.689437             | ±0.013198 | 0.9998 | EXP 150 of150          | 319.75549             | ±0.03034 | 0.9999 | EXP 150 of150          |
| 20F24347         | 17.0 % | 0.1502378             | ±0.0005221 | 0.7602 | EXP 149 of150          | 0.9351035             | ±0.0055637 | 0.7665 | EXP 150 of150          | 0.1318488             | ±0.0060180 | 0.0605 | EXP 150 of150          | 8.717213              | ±0.007552 | 0.9907 | EXP 150 of150          | 85.61909              | ±0.02138 | 0.9977 | EXP 150 of150          |
| 20F24349         | 17.0 % | 0.0300886             | ±0.0002775 | 0.8545 | EXP 150 of150          | 0.0183217             | ±0.0060671 | 0.0000 | EXP 150 of150          | 1.1403635             | ±0.0072166 | 0.7322 | EXP 149 of150          | 95.058427             | ±0.012105 | 0.9999 | EXP 149 of150          | 310.11615             | ±0.02839 | 0.9999 | EXP 150 of150          |
| 20F24350         | 17.0 % | 0.0302417             | ±0.0003060 | 0.6880 | EXP 150 of150          | 0.0399232             | ±0.0057414 | 0.0053 | EXP 150 of150          | 0.3202118             | ±0.0067518 | 0.1905 | EXP 150 of150          | 26.323155             | ±0.009268 | 0.9987 | EXP 150 of150          | 72.49608              | ±0.01699 | 0.9968 | EXP 149 of150          |
| 20F24352         | 17.0 % | 0.0238230             | ±0.0002852 | 0.8819 | EXP 150 of150          | 0.0043258             | ±0.0054382 | 0.0000 | EXP 148 of150          | 1.2022454             | ±0.0064565 | 0.7831 | EXP 150 of150          | 101.528747            | ±0.013504 | 0.9998 | EXP 149 of150          | 338.09662             | ±0.02824 | 0.9999 | EXP 149 of150          |
| 20F24353         | 17.0 % | 0.0118157             | ±0.0001861 | 0.9342 | EXP 150 of150          | 0.0093462             | ±0.0057915 | 0.0052 | EXP 150 of150          | 0.4792048             | ±0.0066658 | 0.3618 | EXP 150 of150          | 40.919892             | ±0.009560 | 0.9995 | EXP 149 of150          | 136.81628             | ±0.01961 | 0.9996 | EXP 149 of150          |
| 20F24356         | 17.0 % | 0.2019167             | ±0.0006458 | 0.6754 | EXP 148 of150          | 0.0178208             | ±0.0052548 | 0.0002 | EXP 150 of150          | 1.6601112             | ±0.0064132 | 0.8787 | EXP 148 of150          | 135.972290            | ±0.017481 | 0.9998 | EXP 150 of150          | 504.89583             | ±0.03110 | 1.0000 | EXP 150 of150          |
| 20F24358         | 17.0 % | 0.0431237             | ±0.0003484 | 0.5137 | EXP 150 of150          | 0.0544758             | ±0.0060536 | 0.0209 | EXP 150 of150          | 0.6460986             | ±0.0066574 | 0.5045 | EXP 150 of150          | 54.135825             | ±0.010963 | 0.9996 | EXP 150 of150          | 168.94766             | ±0.02095 | 0.9997 | EXP 150 of150          |
| 20F24361         | 17.0 % | 0.0135545             | ±0.0002199 | 0.9108 | EXP 149 of150          | 0.0123959             | ±0.0060340 | 0.0007 | EXP 150 of150          | 0.6747563             | ±0.0061695 | 0.5843 | EXP 149 of150          | 56.418287             | ±0.011068 | 0.9996 | EXP 149 of150          | 187.93116             | ±0.02365 | 0.9997 | EXP 150 of150          |
| 20F24362         | 17.0 % | 0.0338832             | ±0.0003149 | 0.7866 | EXP 150 of150          | 0.0009160             | ±0.0052302 | 0.0017 | EXP 150 of150          | 0.8977549             | ±0.0063939 | 0.6564 | EXP 150 of150          | 75.551876             | ±0.012859 | 0.9997 | EXP 150 of150          | 257.42481             | ±0.02878 | 0.9998 | EXP 150 of150          |
| 20F24364         | 17.0 % | 0.0279763             | ±0.0002871 | 0.8014 | EXP 150 of150          | 0.0069872             | ±0.0056829 | 0.0020 | EXP 150 of150          | 0.7047838             | ±0.0062575 | 0.5052 | EXP 150 of150          | 59.658458             | ±0.010777 | 0.9997 | EXP 150 of150          | 203.07167             | ±0.02302 | 0.9998 | EXP 148 of150          |
| 20F24365         | 17.0 % | 0.0096778             | ±0.0002004 | 0.9441 | EXP 148 of150          | 0.0016515             | ±0.0055826 | 0.0012 | EXP 149 of150          | 0.7263725             | ±0.0068599 | 0.5405 | EXP 149 of150          | 60.484167             | ±0.010322 | 0.9997 | EXP 149 of150          | 200.64347             | ±0.02476 | 0.9998 | EXP 148 of150          |
| 20F24367         | 17.0 % | 0.0184630             | ±0.0002248 | 0.8525 | EXP 150 of150          | 0.0017723             | ±0.0053972 | 0.0082 | EXP 150 of150          | 0.4160759             | ±0.0061514 | 0.3501 | EXP 148 of150          | 34.997698             | ±0.009827 | 0.9992 | EXP 150 of150          | 121.85661             | ±0.02124 | 0.9993 | EXP 150 of150          |
| 20F24368         | 17.0 % | 0.0284331             | ±0.0002992 | 0.7179 | EXP 150 of150          | 0.0000096             | ±0.0056417 | 0.0081 | EXP 149 of150          | 0.3832349             | ±0.0069473 | 0.1416 | EXP 146 of150          | 32.455675             | ±0.008722 | 0.9993 | EXP 149 of150          | 114.87083             | ±0.02149 | 0.9992 | EXP 150 of150          |
| 20F24370         | 17.0 % | 0.0170150             | ±0.0001954 | 0.9070 | EXP 147 of150          | 0.0040864             | ±0.0058835 | 0.0134 | EXP 149 of150          | 0.3948580             | ±0.0060250 | 0.2315 | EXP 150 of150          | 33.415686             | ±0.009855 | 0.9992 | EXP 150 of150          | 113.91656             | ±0.02032 | 0.9992 | EXP 150 of150          |
| 20F24371         | 17.0 % | 0.0295627             | ±0.0002533 | 0.7389 | EXP 150 of150          | 0.0077559             | ±0.0057905 | 0.0050 | EXP 150 of150          | 0.3760071             | ±0.0064002 | 0.2714 | EXP 149 of150          | 31.750009             | ±0.008801 | 0.9993 | EXP 148 of150          | 112.10500             | ±0.01870 | 0.9994 | EXP 146 of150          |
| 20F24373         | 17.0 % | 0.0126964             | ±0.0002323 | 0.8737 | EXP 150 of150          | 0.0063640             | ±0.0056502 | 0.0000 | EXP 150 of150          | 0.3277465             | ±0.0068468 | 0.2352 | EXP 150 of150          | 27.379125             | ±0.007708 | 0.9992 | EXP 150 of150          | 95.15882              | ±0.01827 | 0.9990 | EXP 149 of150          |
| 20F24374         | 17.0 % | 0.0198741             | ±0.0002308 | 0.8857 | EXP 148 of150          | 0.0067523             | ±0.0058915 | 0.0248 | EXP 150 of150          | 0.6421879             | ±0.0065917 | 0.4812 | EXP 149 of150          | 54.465499             | ±0.010817 | 0.9996 | EXP 150 of150          | 183.09043             | ±0.02441 | 0.9997 | EXP 150 of150          |
| 20F24376         | 17.0 % | 0.3412562             | ±0.0007904 | 0.9287 | EXP 150 of150          | 0.0013186             | ±0.0056010 | 0.0003 | EXP 149 of150          | 0.9052596             | ±0.0068070 | 0.6320 | EXP 150 of150          | 69.843068             | ±0.011775 | 0.9997 | EXP 150 of150          | 337.28288             | ±0.02911 | 0.9999 | EXP 149 of150          |
| 20F24377         | 17.0 % | 0.0228300             | ±0.0002356 | 0.7904 | EXP 150 of150          | 1.1196409             | ±0.0064615 | 0.7583 | EXP 150 of150          | 0.0725183             | ±0.0067717 | 0.0003 | EXP 150 of150          | 6.757028              | ±0.006962 | 0.9859 | EXP 150 of150          | 23.00301              | ±0.01758 | 0.9866 | EXP 150 of150          |
| 20F24379         | 17.0 % | 0.0434260             | ±0.0003471 | 0.7387 | EXP 149 of150          | 0.0218648             | ±0.0053640 | 0.0134 | EXP 150 of150          | 1.1382043             | ±0.0066556 | 0.7394 | EXP 150 of150          | 95.530321             | ±0.012811 | 0.9998 | EXP 150 of150          | 344.99593             | ±0.02775 | 0.9999 | EXP 150 of150          |
| 20F24380         | 17.0 % | 0.0583962             | ±0.0004051 | 0.3132 | EXP 150 of150          | 0.0024241             | ±0.0055310 | 0.0001 | EXP 150 of150          | 0.6616919             | ±0.0064407 | 0.5389 | EXP 150 of150          | 53.953908             | ±0.010837 | 0.9996 | EXP 150 of150          | 197.53619             | ±0.02537 | 0.9997 | EXP 150 of150          |

| Project Info |        | Analyst     | Irradiation | X-pos | Y-pos | Z/H-pos | Project                | Experiment | Nmb |
|--------------|--------|-------------|-------------|-------|-------|---------|------------------------|------------|-----|
| 20F24337     | 17.0 % | Dan Miggins | 20-OSU-01   | 0.00  | 0.00  | 7.23    | Oregon\Swenton (20-01) | 20F24333   | 01  |
| 20F24338     | 17.0 % | Dan Miggins | 20-OSU-01   | 0.00  | 0.00  | 7.23    | Oregon\Swenton (20-01) | 20F24333   | 01  |
| 20F24340     | 17.0 % | Dan Miggins | 20-OSU-01   | 0.00  | 0.00  | 7.23    | Oregon\Swenton (20-01) | 20F24333   | 01  |
| 20F24341     | 17.0 % | Dan Miggins | 20-OSU-01   | 0.00  | 0.00  | 7.23    | Oregon\Swenton (20-01) | 20F24333   | 01  |
| 20F24343     | 17.0 % | Dan Miggins | 20-OSU-01   | 0.00  | 0.00  | 7.23    | Oregon\Swenton (20-01) | 20F24333   | 01  |
| 20F24344     | 17.0 % | Dan Miggins | 20-OSU-01   | 0.00  | 0.00  | 7.23    | Oregon\Swenton (20-01) | 20F24333   | 01  |
| 20F24347     | 17.0 % | Dan Miggins | 20-OSU-01   | 0.00  | 0.00  | 7.23    | Oregon\Swenton (20-01) | 20F24333   | 01  |
| 20F24349     | 17.0 % | Dan Miggins | 20-OSU-01   | 0.00  | 0.00  | 7.23    | Oregon\Swenton (20-01) | 20F24333   | 01  |
| 20F24350     | 17.0 % | Dan Miggins | 20-OSU-01   | 0.00  | 0.00  | 7.23    | Oregon\Swenton (20-01) | 20F24333   | 01  |
| 20F24352     | 17.0 % | Dan Miggins | 20-OSU-01   | 0.00  | 0.00  | 7.23    | Oregon\Swenton (20-01) | 20F24333   | 01  |
| 20F24353     | 17.0 % | Dan Miggins | 20-OSU-01   | 0.00  | 0.00  | 7.23    | Oregon\Swenton (20-01) | 20F24333   | 01  |
| 20F24356     | 17.0 % | Dan Miggins | 20-OSU-01   | 0.00  | 0.00  | 7.23    | Oregon\Swenton (20-01) | 20F24333   | 01  |
| 20F24358     | 17.0 % | Dan Miggins | 20-OSU-01   | 0.00  | 0.00  | 7.23    | Oregon\Swenton (20-01) | 20F24333   | 01  |
| 20F24361     | 17.0 % | Dan Miggins | 20-OSU-01   | 0.00  | 0.00  | 7.23    | Oregon\Swenton (20-01) | 20F24333   | 01  |
| 20F24362     | 17.0 % | Dan Miggins | 20-OSU-01   | 0.00  | 0.00  | 7.23    | Oregon\Swenton (20-01) | 20F24333   | 01  |
| 20F24364     | 17.0 % | Dan Miggins | 20-OSU-01   | 0.00  | 0.00  | 7.23    | Oregon\Swenton (20-01) | 20F24333   | 01  |
| 20F24365     | 17.0 % | Dan Miggins | 20-OSU-01   | 0.00  | 0.00  | 7.23    | Oregon\Swenton (20-01) | 20F24333   | 01  |
| 20F24367     | 17.0 % | Dan Miggins | 20-OSU-01   | 0.00  | 0.00  | 7.23    | Oregon\Swenton (20-01) | 20F24333   | 01  |
| 20F24368     | 17.0 % | Dan Miggins | 20-OSU-01   | 0.00  | 0.00  | 7.23    | Oregon\Swenton (20-01) | 20F24333   | 01  |
| 20F24370     | 17.0 % | Dan Miggins | 20-OSU-01   | 0.00  | 0.00  | 7.23    | Oregon\Swenton (20-01) | 20F24333   | 01  |
| 20F24371     | 17.0 % | Dan Miggins | 20-OSU-01   | 0.00  | 0.00  | 7.23    | Oregon\Swenton (20-01) | 20F24333   | 01  |
| 20F24373     | 17.0 % | Dan Miggins | 20-OSU-01   | 0.00  | 0.00  | 7.23    | Oregon\Swenton (20-01) | 20F24333   | 01  |
| 20F24374     | 17.0 % | Dan Miggins | 20-OSU-01   | 0.00  | 0.00  | 7.23    | Oregon\Swenton (20-01) | 20F24333   | 01  |
| 20F24376     | 17.0 % | Dan Miggins | 20-OSU-01   | 0.00  | 0.00  | 7.23    | Oregon\Swenton (20-01) | 20F24333   | 01  |
| 20F24377     | 17.0 % | Dan Miggins | 20-OSU-01   | 0.00  | 0.00  | 7.23    | Oregon\Swenton (20-01) | 20F24333   | 01  |
| 20F24379     | 17.0 % | Dan Miggins | 20-OSU-01   | 0.00  | 0.00  | 7.23    | Oregon\Swenton (20-01) | 20F24333   | 01  |
| 20F24380     | 17.0 % | Dan Miggins | 20-OSU-01   | 0.00  | 0.00  | 7.23    | Oregon\Swenton (20-01) | 20F24333   | 01  |

| Sample Parameters |        | Sample    | Material | Location      | Standard Name   | Standard (in Ma) | %1σ   | Standard Reference  | Standard 40Ar/39Ar | %1σ   | J          | %1σ   | Air 40Ar/36Ar | %1σ   | MDF (lin) | %1σ   | Volume Ratio | Sensitivity (mol/volt) | Day | Month | Year | Hour | Min | Resist |
|-------------------|--------|-----------|----------|---------------|-----------------|------------------|-------|---------------------|--------------------|-------|------------|-------|---------------|-------|-----------|-------|--------------|------------------------|-----|-------|------|------|-----|--------|
| 20F24337          | 17.0 % | EJ-12-21B | Sanidine | Rhyolite Dome | FCT-NM (1D7-20) | 28.201           | 0.082 | Kuiper et al (2008) | 9.38852            | 0.072 | 0.00165367 | 0.072 | 298.423       | 0.124 | 1.0001149 | 0.041 | 1            | 3.54E-14               | 7   | SEP   | 2020 | 2    | 41  | 1      |
| 20F24338          | 17.0 % | EJ-12-21B | Sanidine | Rhyolite Dome | FCT-NM (1D7-20) | 28.201           | 0.082 | Kuiper et al (2008) | 9.38852            | 0.072 | 0.00165367 | 0.072 | 298.423       | 0.124 | 1.0001149 | 0.041 | 1            | 3.54E-14               | 7   | SEP   | 2020 | 2    | 49  | 1      |
| 20F24340          | 17.0 % | EJ-12-21B | Sanidine | Rhyolite Dome | FCT-NM (1D7-20) | 28.201           | 0.082 | Kuiper et al (2008) | 9.38852            | 0.072 | 0.00165367 | 0.072 | 298.423       | 0.124 | 1.0001149 | 0.041 | 1            | 3.54E-14               | 7   | SEP   | 2020 | 3    | 7   | 1      |
| 20F24341          | 17.0 % | EJ-12-21B | Sanidine | Rhyolite Dome | FCT-NM (1D7-20) | 28.201           | 0.082 | Kuiper et al (2008) | 9.38852            | 0.072 | 0.00165367 | 0.072 | 298.423       | 0.124 | 1.0001149 | 0.041 | 1            | 3.54E-14               | 7   | SEP   | 2020 | 3    | 15  | 1      |
| 20F24343          | 17.0 % | EJ-12-21B | Sanidine | Rhyolite Dome | FCT-NM (1D7-20) | 28.201           | 0.082 | Kuiper et al (2008) | 9.38852            | 0.072 | 0.00165367 | 0.072 | 298.423       | 0.124 | 1.0001149 | 0.041 | 1            | 3.54E-14               | 7   | SEP   | 2020 | 3    | 32  | 1      |
| 20F24344          | 17.0 % | EJ-12-21B | Sanidine | Rhyolite Dome | FCT-NM (1D7-20) | 28.201           | 0.082 | Kuiper et al (2008) | 9.38852            | 0.072 | 0.00165367 | 0.072 | 298.423       | 0.124 | 1.0001149 | 0.041 | 1            | 3.54E-14               | 7   | SEP   | 2020 | 3    | 41  | 1      |
| 20F24347          | 17.0 % | EJ-12-21B | Sanidine | Rhyolite Dome | FCT-NM (1D7-20) | 28.201           | 0.082 | Kuiper et al (2008) | 9.38852            | 0.072 | 0.00165367 | 0.072 | 298.423       | 0.124 | 1.0001149 | 0.041 | 1            | 3.54E-14               | 7   | SEP   | 2020 | 4    | 7   | 1      |
| 20F24349          | 17.0 % | EJ-12-21B | Sanidine | Rhyolite Dome | FCT-NM (1D7-20) | 28.201           | 0.082 | Kuiper et al (2008) | 9.38852            | 0.072 | 0.00165367 | 0.072 | 298.423       | 0.124 | 1.0001149 | 0.041 | 1            | 3.54E-14               | 7   | SEP   | 2020 | 4    | 24  | 1      |
| 20F24350          | 17.0 % | EJ-12-21B | Sanidine | Rhyolite Dome | FCT-NM (1D7-20) | 28.201           | 0.082 | Kuiper et al (2008) | 9.38852            | 0.072 | 0.00165367 | 0.072 | 298.423       | 0.124 | 1.0001149 | 0.041 | 1            | 3.54E-14               | 7   | SEP   | 2020 | 4    | 32  | 1      |
| 20F24352          | 17.0 % | EJ-12-21B | Sanidine | Rhyolite Dome | FCT-NM (1D7-20) | 28.201           | 0.082 | Kuiper et al (2008) | 9.38852            | 0.072 | 0.00165367 | 0.072 | 298.423       | 0.124 | 1.0001149 | 0.041 | 1            | 3.54E-14               | 7   | SEP   | 2020 | 4    | 49  | 1      |
| 20F24353          | 17.0 % | EJ-12-21B | Sanidine | Rhyolite Dome | FCT-NM (1D7-20) | 28.201           | 0.082 | Kuiper et al (2008) | 9.38852            | 0.072 | 0.00165367 | 0.072 | 298.423       | 0.124 | 1.0001149 | 0.041 | 1            | 3.54E-14               | 7   | SEP   | 2020 | 4    | 58  | 1      |
| 20F24356          | 17.0 % | EJ-12-21B | Sanidine | Rhyolite Dome | FCT-NM (1D7-20) | 28.201           | 0.082 | Kuiper et al (2008) | 9.38852            | 0.072 | 0.00165367 | 0.072 | 298.423       | 0.124 | 1.0001149 | 0.041 | 1            | 3.54E-14               | 7   | SEP   | 2020 | 5    | 24  | 1      |
| 20F24358          | 17.0 % | EJ-12-21B | Sanidine | Rhyolite Dome | FCT-NM (1D7-20) | 28.201           | 0.082 | Kuiper et al (2008) | 9.38852            | 0.072 | 0.00165367 | 0.072 | 298.423       | 0.124 | 1.0001149 | 0.041 | 1            | 3.54E-14               | 7   | SEP   | 2020 | 5    | 41  | 1      |
| 20F24361          | 17.0 % | EJ-12-21B | Sanidine | Rhyolite Dome | FCT-NM (1D7-20) | 28.201           | 0.082 | Kuiper et al (2008) | 9.38852            | 0.072 | 0.00165367 | 0.072 | 298.423       | 0.124 | 1.0001149 | 0.041 | 1            | 3.54E-14               | 7   | SEP   | 2020 | 6    | 7   | 1      |
| 20F24362          | 17.0 % | EJ-12-21B | Sanidine | Rhyolite Dome | FCT-NM (1D7-20) | 28.201           | 0.082 | Kuiper et al (2008) | 9.38852            | 0.072 | 0.00165367 | 0.072 | 298.423       | 0.124 | 1.0001149 | 0.041 | 1            | 3.54E-14               | 7   | SEP   | 2020 | 6    | 15  | 1      |
| 20F24364          | 17.0 % | EJ-12-21B | Sanidine | Rhyolite Dome | FCT-NM (1D7-20) | 28.201           | 0.082 | Kuiper et al (2008) | 9.38852            | 0.072 | 0.00165367 | 0.072 | 298.423       | 0.124 | 1.0001149 | 0.041 | 1            | 3.54E-14               | 7   | SEP   | 2020 | 6    | 32  | 1      |
| 20F24365          | 17.0 % | EJ-12-21B | Sanidine | Rhyolite Dome | FCT-NM (1D7-20) | 28.201           | 0.082 | Kuiper et al (2008) | 9.38852            | 0.072 | 0.00165367 | 0.072 | 298.423       | 0.124 | 1.0001149 | 0.041 | 1            | 3.54E-14               | 7   | SEP   | 2020 | 6    | 41  | 1      |
| 20F24367          | 17.0 % | EJ-12-21B | Sanidine | Rhyolite Dome | FCT-NM (1D7-20) | 28.201           | 0.082 | Kuiper et al (2008) | 9.38852            | 0.072 | 0.00165367 | 0.072 | 298.423       | 0.124 | 1.0001149 | 0.041 | 1            | 3.54E-14               | 7   | SEP   | 2020 | 6    | 58  | 1      |
| 20F24368          | 17.0 % | EJ-12-21B | Sanidine | Rhyolite Dome | FCT-NM (1D7-20) | 28.201           | 0.082 | Kuiper et al (2008) | 9.38852            | 0.072 | 0.00165367 | 0.072 | 298.423       | 0.124 | 1.0001149 | 0.041 | 1            | 3.54E-14               | 7   | SEP   | 2020 | 7    | 7   | 1      |
| 20F24370          | 17.0 % | EJ-12-21B | Sanidine | Rhyolite Dome | FCT-NM (1D7-20) | 28.201           | 0.082 | Kuiper et al (2008) | 9.38852            | 0.072 | 0.00165367 | 0.072 | 298.423       | 0.124 | 1.0001149 | 0.041 | 1            | 3.54E-14               | 7   | SEP   | 2020 | 7    | 24  | 1      |
| 20F24371          | 17.0 % | EJ-12-21B | Sanidine | Rhyolite Dome | FCT-NM (1D7-20) | 28.201           | 0.082 | Kuiper et al (2008) | 9.38852            | 0.072 | 0.00165367 | 0.072 | 298.423       | 0.124 | 1.0001149 | 0.041 | 1            | 3.54E-14               | 7   | SEP   | 2020 | 7    | 32  | 1      |
| 20F24373          | 17.0 % | EJ-12-21B | Sanidine | Rhyolite Dome | FCT-NM (1D7-20) | 28.201           | 0.082 | Kuiper et al (2008) | 9.38852            | 0.072 | 0.00165367 | 0.072 | 298.423       | 0.124 | 1.0001149 | 0.041 | 1            | 3.54E-14               | 7   | SEP   | 2020 | 7    | 50  | 1      |
| 20F24374          | 17.0 % | EJ-12-21B | Sanidine | Rhyolite Dome | FCT-NM (1D7-20) | 28.201           | 0.082 | Kuiper et al (2008) | 9.38852            | 0.072 | 0.00165367 | 0.072 | 298.423       | 0.124 | 1.0001149 | 0.041 | 1            | 3.54E-14               | 7   | SEP   | 2020 | 7    | 58  | 1      |
| 20F24376          | 17.0 % | EJ-12-21B | Sanidine | Rhyolite Dome | FCT-NM (1D7-20) | 28.201           | 0.082 | Kuiper et al (2008) | 9.38852            | 0.072 | 0.00165367 | 0.072 | 298.423       | 0.124 | 1.0001149 | 0.041 | 1            | 3.54E-14               | 7   | SEP   | 2020 | 8    | 15  | 1      |
| 20F24377          | 17.0 % | EJ-12-21B | Sanidine | Rhyolite Dome | FCT-NM (1D7-20) | 28.201           | 0.082 | Kuiper et al (2008) | 9.38852            | 0.072 | 0.00165367 | 0.072 | 298.423       | 0.124 | 1.0001149 | 0.041 | 1            | 3.54E-14               | 7   | SEP   | 2020 | 8    | 24  | 1      |
| 20F24379          | 17.0 % | EJ-12-21B | Sanidine | Rhyolite Dome | FCT-NM (1D7-20) | 28.201           | 0.082 | Kuiper et al (2008) | 9.38852            | 0.072 | 0.00165367 | 0.072 | 298.423       | 0.124 | 1.0001149 | 0.041 | 1            | 3.54E-14               | 7   | SEP   | 2020 | 8    | 41  | 1      |
| 20F24380          | 17.0 % | EJ-12-21B | Sanidine | Rhyolite Dome | FCT-NM (1D7-20) | 28.201           | 0.082 | Kuiper et al (2008) | 9.38852            | 0.072 | 0.00165367 | 0.072 | 298.423       | 0.124 | 1.0001149 | 0.041 | 1            | 3.54E-14               | 7   | SEP   | 2020 | 8    | 50  | 1      |



| Irradiation<br>Constants |        | 40/36(a) | %1σ   | 40/36(c) | %1σ | 38/36(a) | %1σ   | 38/36(c) | %1σ | 39/37(ca) | %1σ  | 38/37(ca) | %1σ  | 36/37(ca) | %1σ  | 40/39(k) | %1σ  | 38/39(k) | %1σ  | 36/38(cl) | %1σ | K/Ca | %1σ | K/Cl | %1σ | Ca/Cl | %1σ |
|--------------------------|--------|----------|-------|----------|-----|----------|-------|----------|-----|-----------|------|-----------|------|-----------|------|----------|------|----------|------|-----------|-----|------|-----|------|-----|-------|-----|
| 20F24337                 | 17.0 % | 298.56   | 0.104 | 0.018    | 35  | 0.1885   | 0.159 | 1.493    | 3   | 0.000643  | 0.92 | 0.00018   | 9.63 | 0.00027   | 0.17 | 0.000607 | 9.65 | 0.012077 | 0.09 | 0         | 0   | 0.43 | 0   | 0    | 0   | 0     | 0   |
| 20F24338                 | 17.0 % | 298.56   | 0.104 | 0.018    | 35  | 0.1885   | 0.159 | 1.493    | 3   | 0.000643  | 0.92 | 0.00018   | 9.63 | 0.00027   | 0.17 | 0.000607 | 9.65 | 0.012077 | 0.09 | 0         | 0   | 0.43 | 0   | 0    | 0   | 0     | 0   |
| 20F24340                 | 17.0 % | 298.56   | 0.104 | 0.018    | 35  | 0.1885   | 0.159 | 1.493    | 3   | 0.000643  | 0.92 | 0.00018   | 9.63 | 0.00027   | 0.17 | 0.000607 | 9.65 | 0.012077 | 0.09 | 0         | 0   | 0.43 | 0   | 0    | 0   | 0     | 0   |
| 20F24341                 | 17.0 % | 298.56   | 0.104 | 0.018    | 35  | 0.1885   | 0.159 | 1.493    | 3   | 0.000643  | 0.92 | 0.00018   | 9.63 | 0.00027   | 0.17 | 0.000607 | 9.65 | 0.012077 | 0.09 | 0         | 0   | 0.43 | 0   | 0    | 0   | 0     | 0   |
| 20F24343                 | 17.0 % | 298.56   | 0.104 | 0.018    | 35  | 0.1885   | 0.159 | 1.493    | 3   | 0.000643  | 0.92 | 0.00018   | 9.63 | 0.00027   | 0.17 | 0.000607 | 9.65 | 0.012077 | 0.09 | 0         | 0   | 0.43 | 0   | 0    | 0   | 0     | 0   |
| 20F24344                 | 17.0 % | 298.56   | 0.104 | 0.018    | 35  | 0.1885   | 0.159 | 1.493    | 3   | 0.000643  | 0.92 | 0.00018   | 9.63 | 0.00027   | 0.17 | 0.000607 | 9.65 | 0.012077 | 0.09 | 0         | 0   | 0.43 | 0   | 0    | 0   | 0     | 0   |
| 20F24347                 | 17.0 % | 298.56   | 0.104 | 0.018    | 35  | 0.1885   | 0.159 | 1.493    | 3   | 0.000643  | 0.92 | 0.00018   | 9.63 | 0.00027   | 0.17 | 0.000607 | 9.65 | 0.012077 | 0.09 | 0         | 0   | 0.43 | 0   | 0    | 0   | 0     | 0   |
| 20F24349                 | 17.0 % | 298.56   | 0.104 | 0.018    | 35  | 0.1885   | 0.159 | 1.493    | 3   | 0.000643  | 0.92 | 0.00018   | 9.63 | 0.00027   | 0.17 | 0.000607 | 9.65 | 0.012077 | 0.09 | 0         | 0   | 0.43 | 0   | 0    | 0   | 0     | 0   |
| 20F24350                 | 17.0 % | 298.56   | 0.104 | 0.018    | 35  | 0.1885   | 0.159 | 1.493    | 3   | 0.000643  | 0.92 | 0.00018   | 9.63 | 0.00027   | 0.17 | 0.000607 | 9.65 | 0.012077 | 0.09 | 0         | 0   | 0.43 | 0   | 0    | 0   | 0     | 0   |
| 20F24352                 | 17.0 % | 298.56   | 0.104 | 0.018    | 35  | 0.1885   | 0.159 | 1.493    | 3   | 0.000643  | 0.92 | 0.00018   | 9.63 | 0.00027   | 0.17 | 0.000607 | 9.65 | 0.012077 | 0.09 | 0         | 0   | 0.43 | 0   | 0    | 0   | 0     | 0   |
| 20F24353                 | 17.0 % | 298.56   | 0.104 | 0.018    | 35  | 0.1885   | 0.159 | 1.493    | 3   | 0.000643  | 0.92 | 0.00018   | 9.63 | 0.00027   | 0.17 | 0.000607 | 9.65 | 0.012077 | 0.09 | 0         | 0   | 0.43 | 0   | 0    | 0   | 0     | 0   |
| 20F24356                 | 17.0 % | 298.56   | 0.104 | 0.018    | 35  | 0.1885   | 0.159 | 1.493    | 3   | 0.000643  | 0.92 | 0.00018   | 9.63 | 0.00027   | 0.17 | 0.000607 | 9.65 | 0.012077 | 0.09 | 0         | 0   | 0.43 | 0   | 0    | 0   | 0     | 0   |
| 20F24358                 | 17.0 % | 298.56   | 0.104 | 0.018    | 35  | 0.1885   | 0.159 | 1.493    | 3   | 0.000643  | 0.92 | 0.00018   | 9.63 | 0.00027   | 0.17 | 0.000607 | 9.65 | 0.012077 | 0.09 | 0         | 0   | 0.43 | 0   | 0    | 0   | 0     | 0   |
| 20F24361                 | 17.0 % | 298.56   | 0.104 | 0.018    | 35  | 0.1885   | 0.159 | 1.493    | 3   | 0.000643  | 0.92 | 0.00018   | 9.63 | 0.00027   | 0.17 | 0.000607 | 9.65 | 0.012077 | 0.09 | 0         | 0   | 0.43 | 0   | 0    | 0   | 0     | 0   |
| 20F24362                 | 17.0 % | 298.56   | 0.104 | 0.018    | 35  | 0.1885   | 0.159 | 1.493    | 3   | 0.000643  | 0.92 | 0.00018   | 9.63 | 0.00027   | 0.17 | 0.000607 | 9.65 | 0.012077 | 0.09 | 0         | 0   | 0.43 | 0   | 0    | 0   | 0     | 0   |
| 20F24364                 | 17.0 % | 298.56   | 0.104 | 0.018    | 35  | 0.1885   | 0.159 | 1.493    | 3   | 0.000643  | 0.92 | 0.00018   | 9.63 | 0.00027   | 0.17 | 0.000607 | 9.65 | 0.012077 | 0.09 | 0         | 0   | 0.43 | 0   | 0    | 0   | 0     | 0   |
| 20F24365                 | 17.0 % | 298.56   | 0.104 | 0.018    | 35  | 0.1885   | 0.159 | 1.493    | 3   | 0.000643  | 0.92 | 0.00018   | 9.63 | 0.00027   | 0.17 | 0.000607 | 9.65 | 0.012077 | 0.09 | 0         | 0   | 0.43 | 0   | 0    | 0   | 0     | 0   |
| 20F24367                 | 17.0 % | 298.56   | 0.104 | 0.018    | 35  | 0.1885   | 0.159 | 1.493    | 3   | 0.000643  | 0.92 | 0.00018   | 9.63 | 0.00027   | 0.17 | 0.000607 | 9.65 | 0.012077 | 0.09 | 0         | 0   | 0.43 | 0   | 0    | 0   | 0     | 0   |
| 20F24368                 | 17.0 % | 298.56   | 0.104 | 0.018    | 35  | 0.1885   | 0.159 | 1.493    | 3   | 0.000643  | 0.92 | 0.00018   | 9.63 | 0.00027   | 0.17 | 0.000607 | 9.65 | 0.012077 | 0.09 | 0         | 0   | 0.43 | 0   | 0    | 0   | 0     | 0   |
| 20F24370                 | 17.0 % | 298.56   | 0.104 | 0.018    | 35  | 0.1885   | 0.159 | 1.493    | 3   | 0.000643  | 0.92 | 0.00018   | 9.63 | 0.00027   | 0.17 | 0.000607 | 9.65 | 0.012077 | 0.09 | 0         | 0   | 0.43 | 0   | 0    | 0   | 0     | 0   |
| 20F24371                 | 17.0 % | 298.56   | 0.104 | 0.018    | 35  | 0.1885   | 0.159 | 1.493    | 3   | 0.000643  | 0.92 | 0.00018   | 9.63 | 0.00027   | 0.17 | 0.000607 | 9.65 | 0.012077 | 0.09 | 0         | 0   | 0.43 | 0   | 0    | 0   | 0     | 0   |
| 20F24373                 | 17.0 % | 298.56   | 0.104 | 0.018    | 35  | 0.1885   | 0.159 | 1.493    | 3   | 0.000643  | 0.92 | 0.00018   | 9.63 | 0.00027   | 0.17 | 0.000607 | 9.65 | 0.012077 | 0.09 | 0         | 0   | 0.43 | 0   | 0    | 0   | 0     | 0   |
| 20F24374                 | 17.0 % | 298.56   | 0.104 | 0.018    | 35  | 0.1885   | 0.159 | 1.493    | 3   | 0.000643  | 0.92 | 0.00018   | 9.63 | 0.00027   | 0.17 | 0.000607 | 9.65 | 0.012077 | 0.09 | 0         | 0   | 0.43 | 0   | 0    | 0   | 0     | 0   |
| 20F24376                 | 17.0 % | 298.56   | 0.104 | 0.018    | 35  | 0.1885   | 0.159 | 1.493    | 3   | 0.000643  | 0.92 | 0.00018   | 9.63 | 0.00027   | 0.17 | 0.000607 | 9.65 | 0.012077 | 0.09 | 0         | 0   | 0.43 | 0   | 0    | 0   | 0     | 0   |
| 20F24377                 | 17.0 % | 298.56   | 0.104 | 0.018    | 35  | 0.1885   | 0.159 | 1.493    | 3   | 0.000643  | 0.92 | 0.00018   | 9.63 | 0.00027   | 0.17 | 0.000607 | 9.65 | 0.012077 | 0.09 | 0         | 0   | 0.43 | 0   | 0    | 0   | 0     | 0   |
| 20F24379                 | 17.0 % | 298.56   | 0.104 | 0.018    | 35  | 0.1885   | 0.159 | 1.493    | 3   | 0.000643  | 0.92 | 0.00018   | 9.63 | 0.00027   | 0.17 | 0.000607 | 9.65 | 0.012077 | 0.09 | 0         | 0   | 0.43 | 0   | 0    | 0   | 0     | 0   |
| 20F24380                 | 17.0 % | 298.56   | 0.104 | 0.018    | 35  | 0.1885   | 0.159 | 1.493    | 3   | 0.000643  | 0.92 | 0.00018   | 9.63 | 0.00027   | 0.17 | 0.000607 | 9.65 | 0.012077 | 0.09 | 0         | 0   | 0.43 | 0   | 0    | 0   | 0     | 0   |

20F24333.AGE >>> EJ-12-21B >>> OREGON | SWENTON (20-01) PROJECT

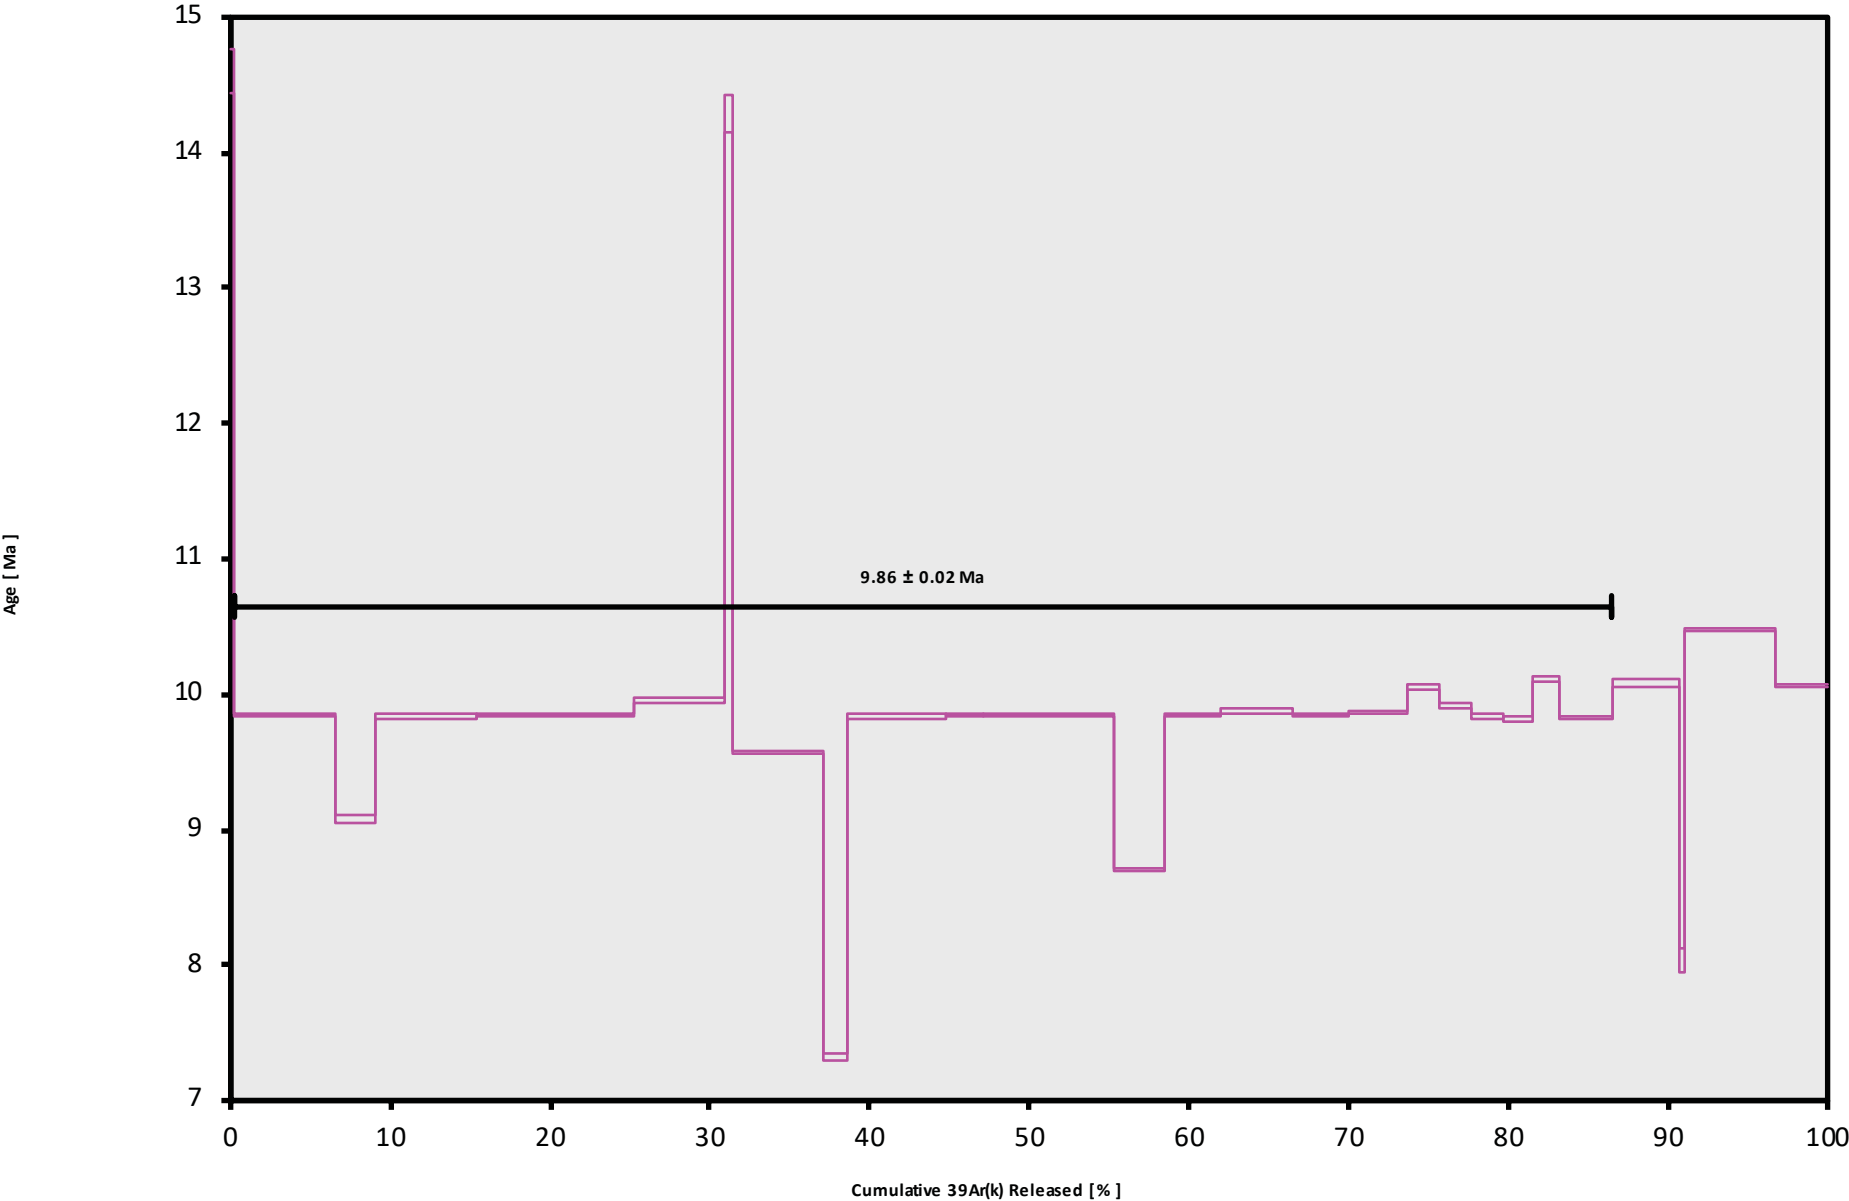

Ar-Ages in Ma

WEIGHTED PLATEAU

$9.86 \pm 0.02$

TOTAL FUSION

$9.83 \pm 0.01$

NORMAL ISOCHRON

$9.86 \pm 0.03$

INVERSE ISOCHRON

$9.86 \pm 0.03$

MSWD (PROBABILITY)

30.48 (0%)

Sample Info

Sanidine

Rhyolite Dome

Dan Miggins

IRR = 20-OSU-01 (1D7-20)

## 20F24333.AGE >>> EJ-12-21B >>> OREGON | SWENTON (20-01) PROJECT

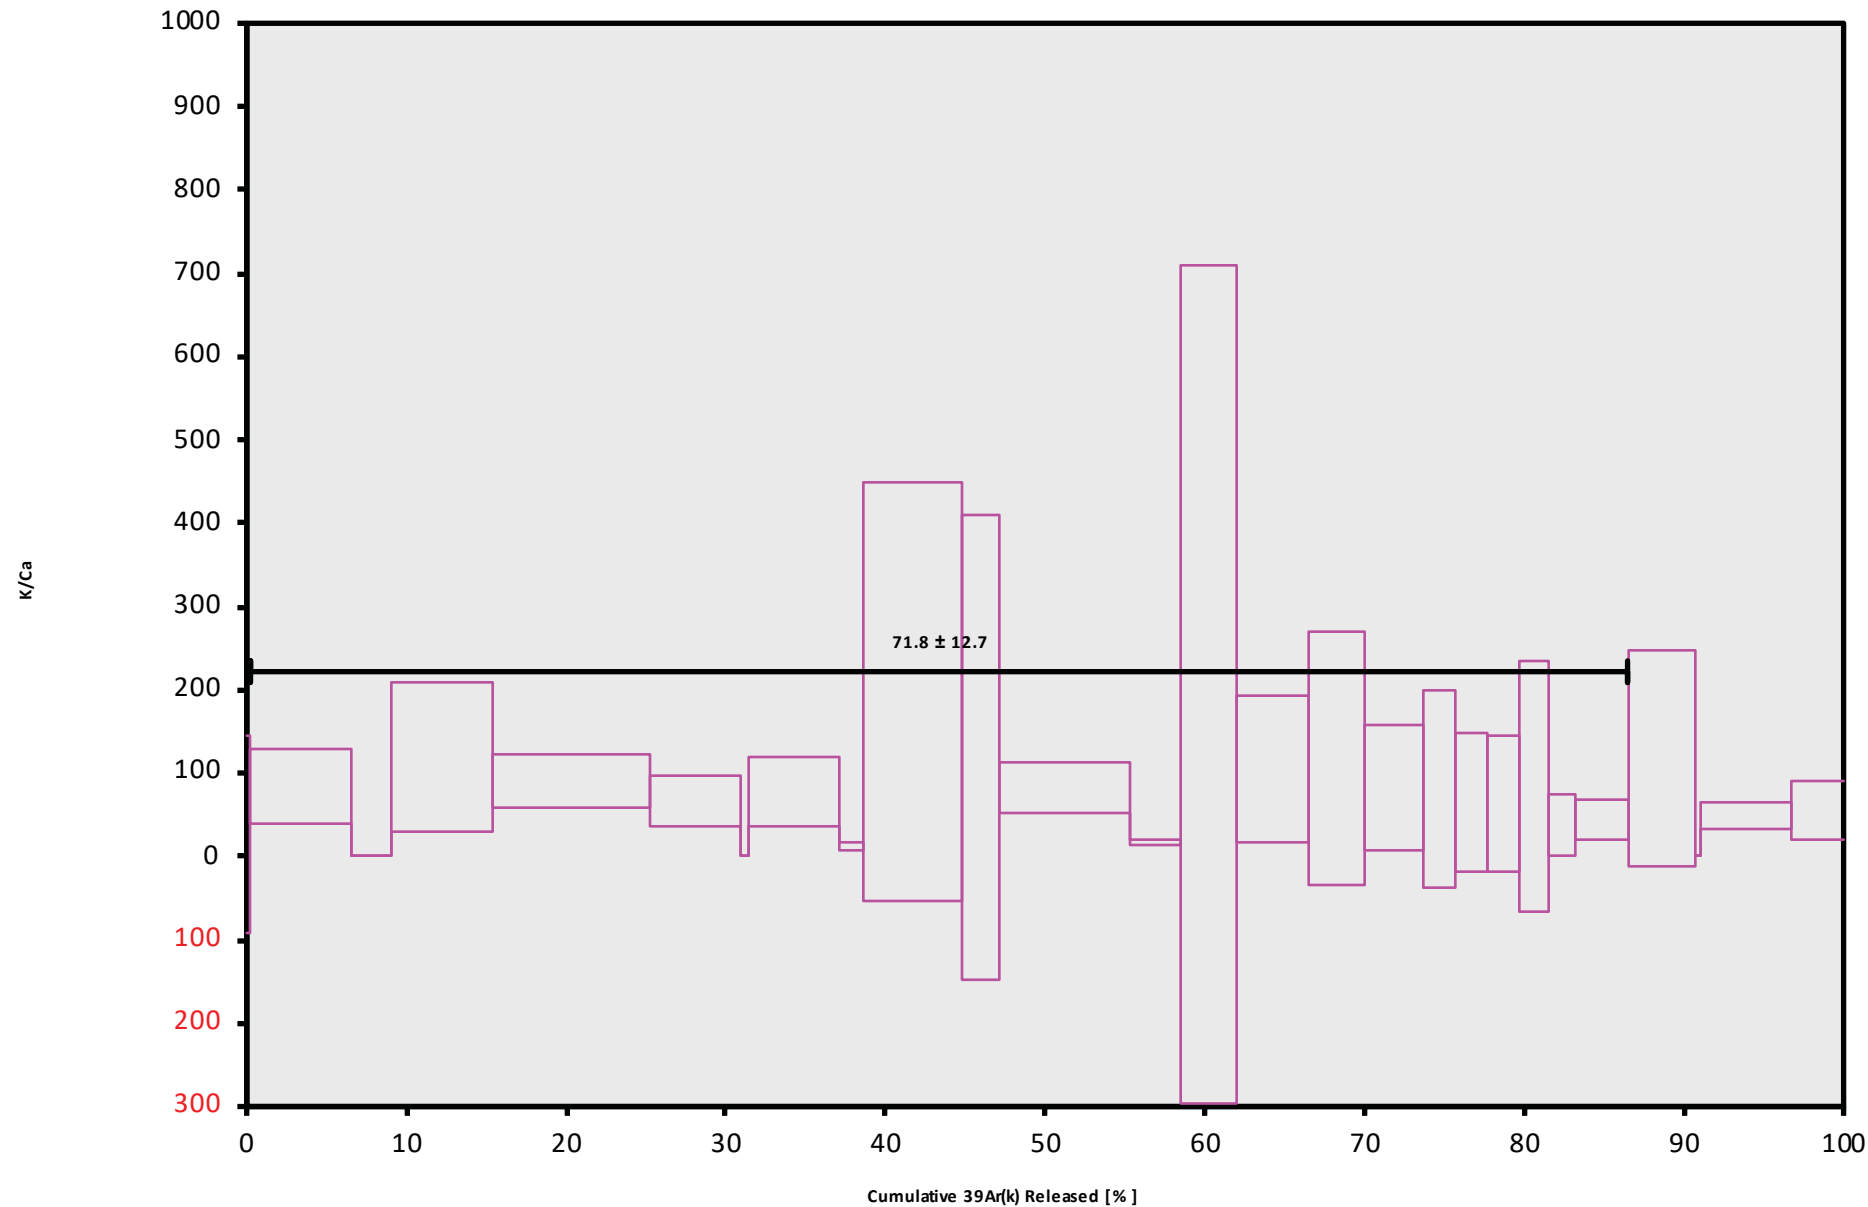

### Ar-Ages in Ma

**WEIGHTED PLATEAU**

**$9.86 \pm 0.02$**

**TOTAL FUSION**

**$9.83 \pm 0.01$**

**NORMAL ISOCHRON**

**$9.86 \pm 0.03$**

**INVERSE ISOCHRON**

**$9.86 \pm 0.03$**

### Sample Info

**Sanidine**

**Rhyolite Dome**

**Dan Miggins**

**IRR = 20-OSU-01 (1D7-20)**

20F24333.AGE >>> EJ-12-21B >>> OREGON | SWENTON (20-01) PROJECT

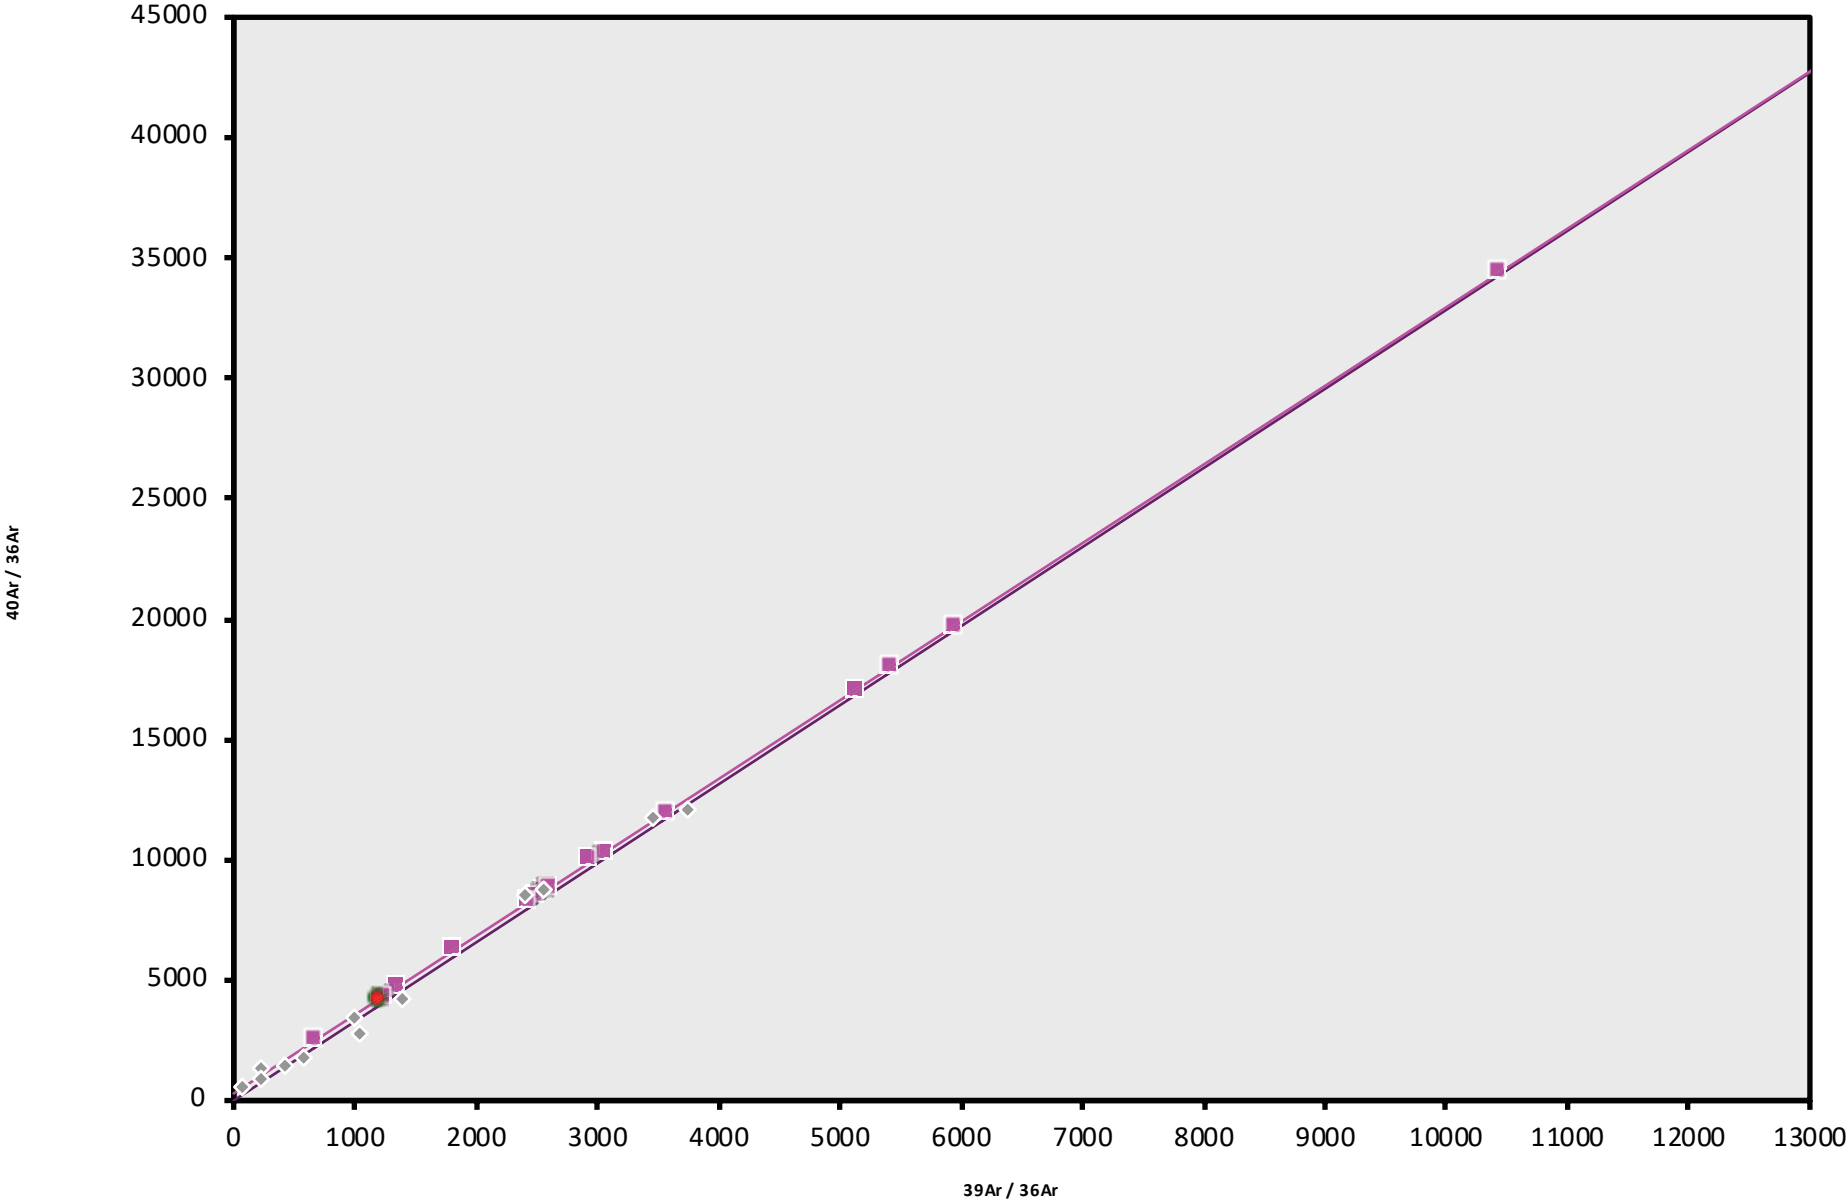

**Ar-Ages in Ma**

**WEIGHTED PLATEAU**  
 $9.86 \pm 0.02$

**TOTAL FUSION**  
 $9.83 \pm 0.01$

**NORMAL ISOCHRON**  
 $9.86 \pm 0.03$

**INVERSE ISOCHRON**  
 $9.86 \pm 0.03$

**MSWD (PROBABILITY)**  
 $27.84 (0\%)$

**40AR/36AR INTERCEPT**  
 $296.4 \pm 18.1$

**Sample Info**

Sanidine  
Rhyolite Dome  
Dan Miggins

**IRR = 20-OSU-01 (1D7-20)**

20F24333.AGE >>> EJ-12-21B >>> OREGON | SWENTON (20-01) PROJECT

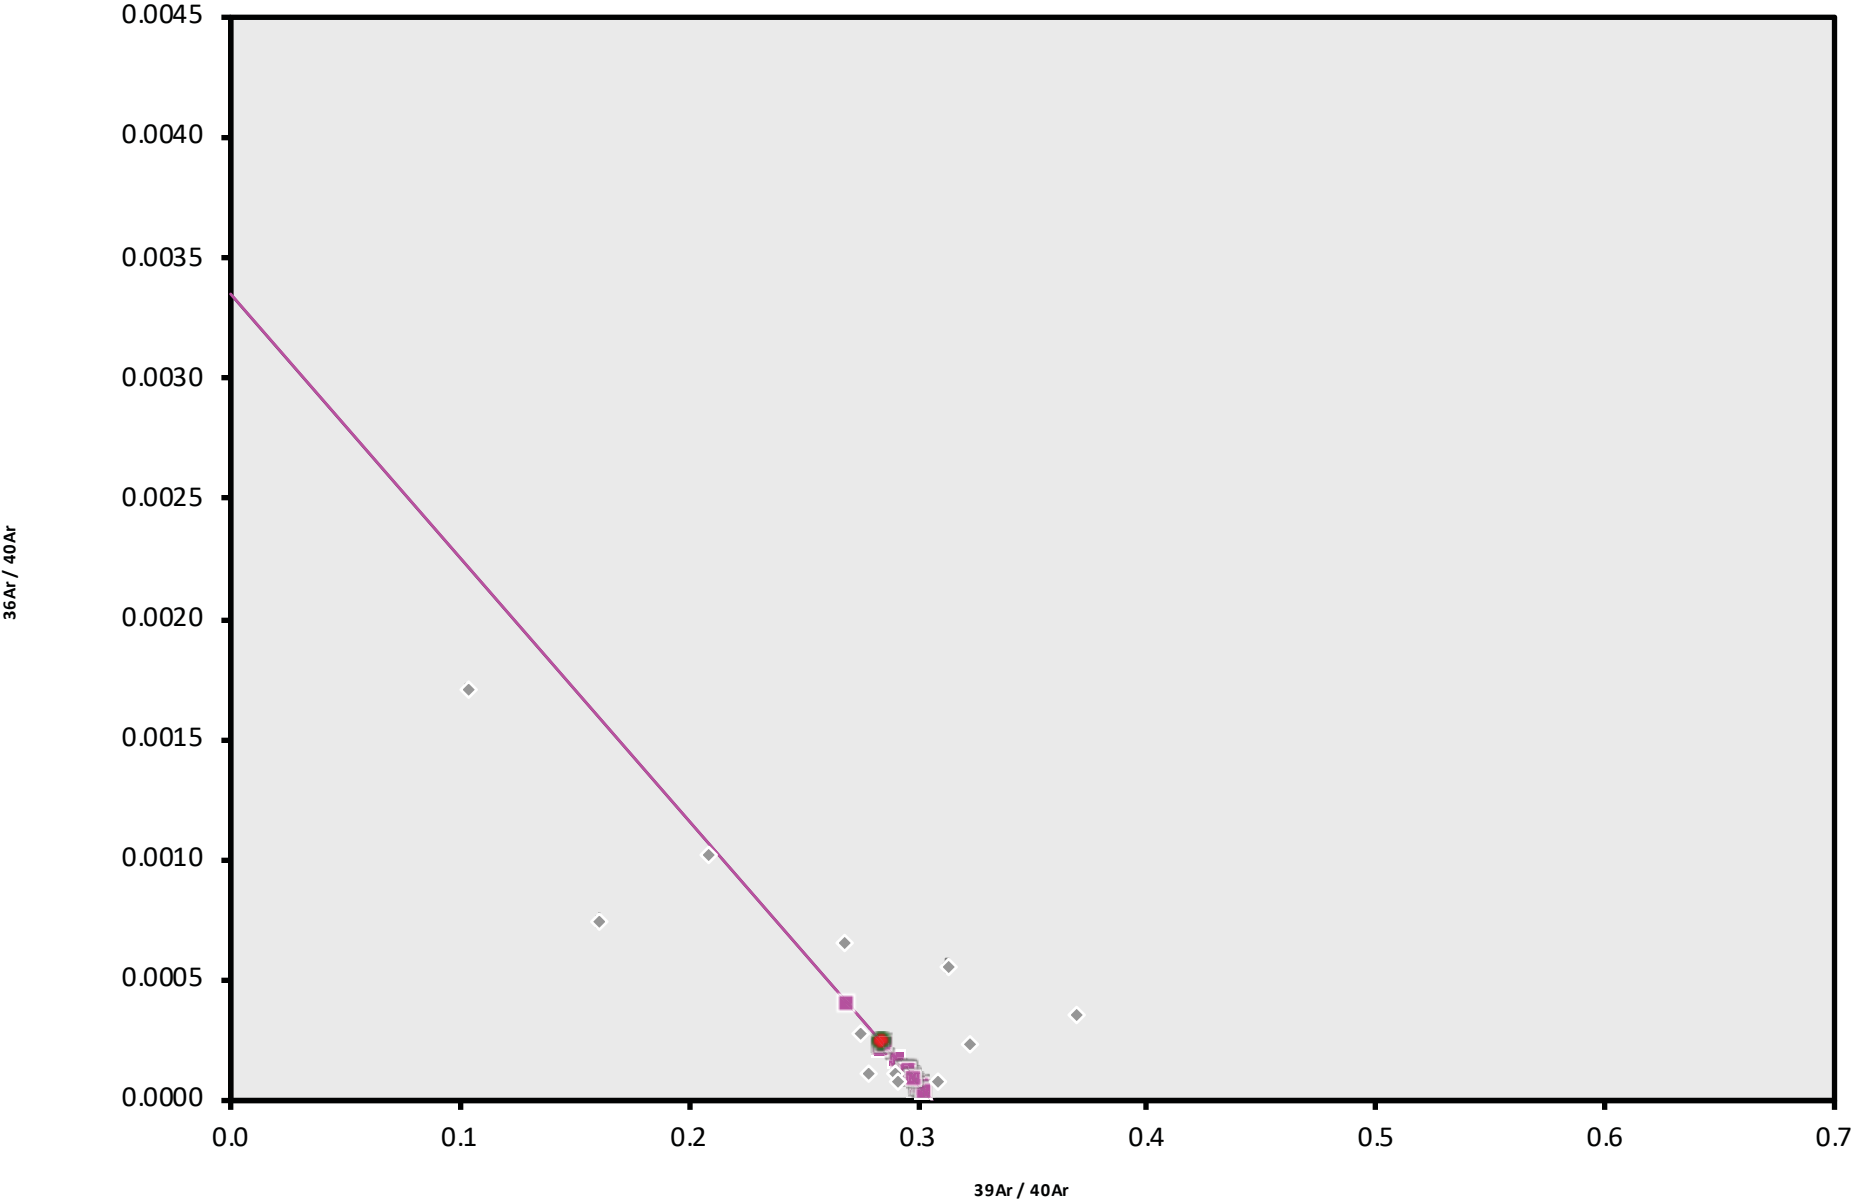

Ar-Ages in Ma

WEIGHTED PLATEAU

$9.86 \pm 0.02$

TOTAL FUSION

$9.83 \pm 0.01$

NORMAL ISOCHRON

$9.86 \pm 0.03$

INVERSE ISOCHRON

$9.86 \pm 0.03$

MSWD (PROBABILITY)

33.23 (0%)

SPREADING FACTOR

Sample Info

Sanidine

Rhyolite Dome

Dan Miggins

IRR = 20-OSU-01 (1D7-20)

| Incremental Heating |        |   | 36Ar(a)<br>[fA] | 37Ar(ca)<br>[fA] | 38Ar(cl)<br>[fA] | 39Ar(k)<br>[fA] | 40Ar(r)<br>[fA] | Age ± 2σ<br>(Ma) | 40Ar(r)<br>(%) | 39Ar(k)<br>(%) | K/Ca ± 2σ    |
|---------------------|--------|---|-----------------|------------------|------------------|-----------------|-----------------|------------------|----------------|----------------|--------------|
| 20F24408            | 17.0 % | ✓ | 0.0667979       | 5.212872         | 0.0000000        | 522.2796        | 1986.145        | 11.47 ±0.01      | 98.99          | 6.02           | 43.1 ±2.4    |
| 20F24409            | 17.0 % | ✓ | 0.0696440       | 4.404803         | 0.0000000        | 390.0447        | 1483.366        | 11.47 ±0.01      | 98.60          | 4.49           | 38.1 ±2.5    |
| 20F24411            | 17.0 % | ✓ | 0.1600070       | 2.516951         | 0.0000000        | 226.0216        | 857.199         | 11.44 ±0.01      | 94.71          | 2.60           | 38.6 ±4.4    |
| 20F24412            | 17.0 % | ✓ | 0.1235059       | 6.628888         | 0.0000000        | 622.0978        | 2365.990        | 11.48 ±0.01      | 98.45          | 7.17           | 40.4 ±1.8    |
| 20F24414            | 17.0 % | ✓ | 0.1738437       | 2.821869         | 0.0000000        | 256.7186        | 975.847         | 11.47 ±0.01      | 94.94          | 2.96           | 39.1 ±3.8    |
| 20F24415            | 17.0 % | ✓ | 0.0877170       | 5.207265         | 0.0000000        | 426.1318        | 1621.329        | 11.48 ±0.01      | 98.39          | 4.91           | 35.2 ±1.9    |
| 20F24417            | 17.0 % |   | 0.5815648       | 3.446172         | 0.0000000        | 267.2334        | 1009.409        | 11.40 ±0.02      | 85.31          | 3.08           | 33.3 ±2.6    |
| 20F24418            | 17.0 % | ✓ | 0.0201808       | 3.006477         | 0.0000000        | 214.2713        | 813.207         | 11.45 ±0.01      | 99.25          | 2.47           | 30.6 ±2.8    |
| 20F24420            | 17.0 % | ✓ | 0.0254179       | 3.931605         | 0.0000000        | 351.3015        | 1335.846        | 11.47 ±0.01      | 99.42          | 4.05           | 38.4 ±2.8    |
| 20F24421            | 17.0 % | ✓ | 0.0474947       | 2.478483         | 0.0000000        | 243.0396        | 923.804         | 11.47 ±0.01      | 98.47          | 2.80           | 42.2 ±4.8    |
| 20F24423            | 17.0 % | ✓ | 0.0361800       | 5.621411         | 0.0000000        | 566.7324        | 2152.559        | 11.46 ±0.01      | 99.48          | 6.53           | 43.4 ±2.2    |
| 20F24424            | 17.0 % | ✓ | 0.0522726       | 4.155443         | 0.0000000        | 382.2263        | 1452.462        | 11.47 ±0.01      | 98.92          | 4.40           | 39.6 ±2.5    |
| 20F24426            | 17.0 % | ✓ | 0.1014715       | 3.216682         | 0.0000000        | 295.3559        | 1122.526        | 11.47 ±0.01      | 97.36          | 3.40           | 39.5 ±3.4    |
| 20F24427            | 17.0 % | ✓ | 0.2536855       | 4.618584         | 0.0000000        | 465.6167        | 1769.035        | 11.46 ±0.01      | 95.88          | 5.36           | 43.3 ±2.6    |
| 20F24429            | 17.0 % | ✓ | 0.3011303       | 3.544280         | 0.0000000        | 323.1390        | 1229.018        | 11.48 ±0.01      | 93.17          | 3.72           | 39.2 ±3.1    |
| 20F24430            | 17.0 % | ✓ | 0.0332544       | 4.981806         | 0.0000000        | 481.2608        | 1828.136        | 11.46 ±0.01      | 99.44          | 5.54           | 41.5 ±2.4    |
| 20F24432            | 17.0 % | ✓ | 0.0408903       | 4.672838         | 0.0000000        | 374.2993        | 1421.576        | 11.46 ±0.01      | 99.13          | 4.31           | 34.4 ±2.1    |
| 20F24433            | 17.0 % | ✓ | 0.1553000       | 5.919705         | 0.0000000        | 510.1601        | 1939.494        | 11.47 ±0.01      | 97.65          | 5.88           | 37.1 ±1.7    |
| 20F24435            | 17.0 % | ✓ | 0.0084563       | 1.761904         | 0.0005414        | 141.0744        | 535.281         | 11.45 ±0.01      | 99.51          | 1.63           | 34.4 ±5.3    |
| 20F24436            | 17.0 % | ✓ | 0.0369522       | 1.556192         | 0.0000000        | 162.7708        | 617.416         | 11.45 ±0.01      | 98.23          | 1.88           | 45.0 ±7.6    |
| 20F24438            | 17.0 % | ✓ | 0.1791718       | 3.975679         | 0.0000000        | 351.3020        | 1335.585        | 11.47 ±0.01      | 96.13          | 4.05           | 38.0 ±2.7    |
| 20F24439            | 17.0 % | ✓ | 0.0326021       | 2.617545         | 0.0000000        | 250.8298        | 952.741         | 11.46 ±0.01      | 98.97          | 2.89           | 41.2 ±4.3    |
| 20F24441            | 17.0 % |   | 0.5818004       | 2.207186         | 0.0085109        | 246.1031        | 857.079         | 10.51 ±0.02      | 83.14          | 2.84           | 47.9 ±5.8    |
| 20F24442            | 17.0 % |   | 0.0569606       | 1.810127         | 0.0298137        | 147.7712        | 570.733         | 11.65 ±0.01      | 97.09          | 1.70           | 35.1 ±4.8    |
| 20F24444            | 17.0 % |   | 0.0294478       | 0.693623         | 0.0000000        | 83.5536         | 274.806         | 9.93 ±0.01       | 96.88          | 0.96           | 51.8 ±20.5   |
| 20F24445            | 17.0 % | ✓ | 0.0012844       | 0.318212         | 0.0000000        | 30.2598         | 114.869         | 11.45 ±0.02      | 100.32         | 0.35           | 40.9 ±38.8   |
| 20F24447            | 17.0 % | ✓ | 0.0271532       | 1.233916         | 0.0000000        | 125.7368        | 476.347         | 11.43 ±0.01      | 98.31          | 1.45           | 43.8 ±9.6    |
| 20F24448            | 17.0 % | ✓ | 0.0298482       | 1.046434         | 0.0000000        | 105.2364        | 398.853         | 11.44 ±0.01      | 97.80          | 1.21           | 43.2 ±11.1   |
| 20F24450            | 17.0 % | ✓ | 0.0004772       | 0.056236         | 0.0000000        | 13.6129         | 51.856          | 11.49 ±0.04      | 99.71          | 0.16           | 104.1 ±545.0 |
| 20F24451            | 17.0 % | ✓ | 0.0016990       | 1.023687         | 0.0000000        | 104.1103        | 395.110         | 11.45 ±0.01      | 100.11         | 1.20           | 43.7 ±11.4   |
| Σ                   |        |   | 3.3102447       | 94.686873        | 0.0388660        | 8680.2914       | 32867.624       |                  |                |                |              |

| Information on Analysis                                                                                                                                                                                                                                | Results                   | 40(r)/39(k) ± 2σ        | Age ± 2σ<br>(Ma)                                                          | MSWD                         | 39Ar(k)<br>(%,n)                                          | K/Ca ± 2σ |
|--------------------------------------------------------------------------------------------------------------------------------------------------------------------------------------------------------------------------------------------------------|---------------------------|-------------------------|---------------------------------------------------------------------------|------------------------------|-----------------------------------------------------------|-----------|
| Project = SWENTON (20-01)<br>Sample = MS-13-10<br>Material = Sanidine<br>Location = Rhyolite Dome<br>Region = Eastern Oregon<br>Analyst = Dan Miggins<br>Irradiation = 20-OSU-01 (1D8-20)<br>J = 0.00165353 ± 0.00000119<br>FCT-NM = 28.201 ± 0.023 Ma | Age Plateau<br>Error Mean | 3.79899 ±0.00167 ±0.04% | 11.46 ±0.02 ±0.15%<br>Full External Error ±0.60<br>Analytical Error ±0.01 | 5.46<br>0%<br>1.57<br>2.3371 | 91.42<br>26<br>2σ Confidence Limit<br>Error Magnification | 38.8 ±1.3 |
|                                                                                                                                                                                                                                                        | Total Fusion Age          | 3.78647 ±0.00073 ±0.02% | 11.43 ±0.02 ±0.14%<br>Full External Error ±0.59<br>Analytical Error ±0.00 |                              | 30                                                        | 39.4 ±0.6 |

| Normal Isochron |        |   | 39(k)/36(a) ± 2σ   | 40(a+r)/36(a) ± 2σ   | r.i.   |
|-----------------|--------|---|--------------------|----------------------|--------|
| 20F24408        | 17.0 % | ✓ | 7818.80 ±128.00    | 30032.19 ±491.00     | 0.9986 |
| 20F24409        | 17.0 % | ✓ | 5600.55 ±88.23     | 21597.83 ±339.77     | 0.9985 |
| 20F24411        | 17.0 % | ✓ | 1412.57 ±12.80     | 5655.82 ±51.02       | 0.9954 |
| 20F24412        | 17.0 % | ✓ | 5036.99 ±52.52     | 19455.45 ±202.16     | 0.9966 |
| 20F24414        | 17.0 % | ✓ | 1476.72 ±13.20     | 5911.92 ±52.59       | 0.9952 |
| 20F24415        | 17.0 % | ✓ | 4858.03 ±66.75     | 18782.20 ±257.59     | 0.9980 |
| 20F24417        | 17.0 % |   | 459.51 ±2.55       | 2034.24 ±11.14       | 0.9877 |
| 20F24418        | 17.0 % | ✓ | 10617.58 ±383.95   | 40594.63 ±1467.55    | 0.9997 |
| 20F24420        | 17.0 % | ✓ | 13821.03 ±487.86   | 52853.90 ±1865.10    | 0.9997 |
| 20F24421        | 17.0 % | ✓ | 5117.20 ±104.12    | 19749.25 ±401.46     | 0.9991 |
| 20F24423        | 17.0 % | ✓ | 15664.25 ±419.20   | 59794.41 ±1599.38    | 0.9995 |
| 20F24424        | 17.0 % | ✓ | 7312.17 ±134.31    | 28084.86 ±515.30     | 0.9989 |
| 20F24426        | 17.0 % | ✓ | 2910.73 ±34.51     | 11361.04 ±134.33     | 0.9973 |
| 20F24427        | 17.0 % | ✓ | 1835.41 ±13.88     | 7271.90 ±54.62       | 0.9935 |
| 20F24429        | 17.0 % | ✓ | 1073.09 ±7.03      | 4379.91 ±28.43       | 0.9913 |
| 20F24430        | 17.0 % | ✓ | 14472.09 ±451.71   | 55272.78 ±1724.55    | 0.9996 |
| 20F24432        | 17.0 % | ✓ | 9153.74 ±207.91    | 35064.18 ±795.86     | 0.9993 |
| 20F24433        | 17.0 % | ✓ | 3285.00 ±31.63     | 12787.25 ±122.65     | 0.9960 |
| 20F24435        | 17.0 % | ✓ | 16682.81 ±1493.60  | 63598.43 ±5693.67    | 1.0000 |
| 20F24436        | 17.0 % | ✓ | 4404.91 ±98.30     | 17007.10 ±379.26     | 0.9992 |
| 20F24438        | 17.0 % | ✓ | 1960.70 ±17.19     | 7752.78 ±67.64       | 0.9951 |
| 20F24439        | 17.0 % | ✓ | 7693.66 ±207.34    | 29521.83 ±795.20     | 0.9995 |
| 20F24441        | 17.0 % |   | 423.00 ±2.24       | 1771.71 ±9.25        | 0.9863 |
| 20F24442        | 17.0 % |   | 2594.27 ±43.72     | 10318.34 ±173.66     | 0.9986 |
| 20F24444        | 17.0 % |   | 2837.34 ±72.98     | 9630.53 ±247.56      | 0.9993 |
| 20F24445        | 17.0 % | ✓ | 23558.76 ±10327.74 | 89133.08 ±39074.26   | 1.0000 |
| 20F24447        | 17.0 % | ✓ | 4630.64 ±138.76    | 17841.49 ±534.40     | 0.9996 |
| 20F24448        | 17.0 % | ✓ | 3525.72 ±90.84     | 13661.26 ±351.78     | 0.9994 |
| 20F24450        | 17.0 % | ✓ | 28524.81 ±31616.42 | 108958.66 ±120767.84 | 1.0000 |
| 20F24451        | 17.0 % | ✓ | 61278.24 ±20904.33 | 232258.94 ±79232.08  | 1.0000 |

| Results         | 40(a)/36(a) ± 2σ      | 40(r)/39(k) ± 2σ | Age ± 2σ (Ma)             | MSWD            |
|-----------------|-----------------------|------------------|---------------------------|-----------------|
| Normal Isochron | 303.21 ±7.65          | 3.79726 ±0.00260 | 11.46 ±0.02               | 5.81            |
| Error Chron     | ±2.52%                | ±0.07%           | ±0.16%                    | 0%              |
|                 |                       |                  | Full External Error ±0.59 |                 |
|                 |                       |                  | Analytical Error ±0.01    |                 |
|                 |                       |                  |                           |                 |
| Statistics      | 2σ Confidence Limit   | 1.58             | Convergence               | 0.000000112183  |
|                 | Error Magnification   | 2.4113           | Number of Iterations      | 1               |
|                 | Number of Data Points | 26               | Calculated Line           | Weighted York-2 |

| Inverse Isochron |        |   | 39(k)/40(a+r) ± 2σ   | 36(a)/40(a+r) ± 2σ     | r.i.   |
|------------------|--------|---|----------------------|------------------------|--------|
| 20F24408         | 17.0 % | ✓ | 0.2603473 ±0.0002230 | 0.00003330 ±0.00000054 | 0.0003 |
| 20F24409         | 17.0 % | ✓ | 0.2593107 ±0.0002234 | 0.00004630 ±0.00000073 | 0.0005 |
| 20F24411         | 17.0 % | ✓ | 0.2497558 ±0.0002173 | 0.00017681 ±0.00000159 | 0.0012 |
| 20F24412         | 17.0 % | ✓ | 0.2588984 ±0.0002220 | 0.00005140 ±0.00000053 | 0.0005 |
| 20F24414         | 17.0 % | ✓ | 0.2497871 ±0.0002177 | 0.00016915 ±0.00000150 | 0.0015 |
| 20F24415         | 17.0 % | ✓ | 0.2586508 ±0.0002224 | 0.00005324 ±0.00000073 | 0.0006 |
| 20F24417         | 17.0 % |   | 0.2258869 ±0.0001960 | 0.00049158 ±0.00000269 | 0.0016 |
| 20F24418         | 17.0 % | ✓ | 0.2615513 ±0.0002280 | 0.00002463 ±0.00000089 | 0.0004 |
| 20F24420         | 17.0 % | ✓ | 0.2614950 ±0.0002260 | 0.00001892 ±0.00000067 | 0.0002 |
| 20F24421         | 17.0 % | ✓ | 0.2591085 ±0.0002254 | 0.00005063 ±0.00000103 | 0.0005 |
| 20F24423         | 17.0 % | ✓ | 0.2619685 ±0.0002247 | 0.00001672 ±0.00000045 | 0.0003 |
| 20F24424         | 17.0 % | ✓ | 0.2603600 ±0.0002241 | 0.00003561 ±0.00000065 | 0.0004 |
| 20F24426         | 17.0 % | ✓ | 0.2562028 ±0.0002219 | 0.00008802 ±0.00000104 | 0.0009 |
| 20F24427         | 17.0 % | ✓ | 0.2523976 ±0.0002167 | 0.00013752 ±0.00000103 | 0.0009 |
| 20F24429         | 17.0 % | ✓ | 0.2450021 ±0.0002114 | 0.00022832 ±0.00000148 | 0.0016 |
| 20F24430         | 17.0 % | ✓ | 0.2618303 ±0.0002252 | 0.00001809 ±0.00000056 | 0.0002 |
| 20F24432         | 17.0 % | ✓ | 0.2610568 ±0.0002251 | 0.00002852 ±0.00000065 | 0.0003 |
| 20F24433         | 17.0 % | ✓ | 0.2568962 ±0.0002204 | 0.00007820 ±0.00000075 | 0.0007 |
| 20F24435         | 17.0 % | ✓ | 0.2623148 ±0.0002333 | 0.00001572 ±0.00000141 | 0.0002 |
| 20F24436         | 17.0 % | ✓ | 0.2590040 ±0.0002303 | 0.00005880 ±0.00000131 | 0.0009 |
| 20F24438         | 17.0 % | ✓ | 0.2529030 ±0.0002189 | 0.00012899 ±0.00000113 | 0.0010 |
| 20F24439         | 17.0 % | ✓ | 0.2606093 ±0.0002274 | 0.00003387 ±0.00000091 | 0.0005 |
| 20F24441         | 17.0 % |   | 0.2387539 ±0.0002082 | 0.00056443 ±0.00000295 | 0.0022 |
| 20F24442         | 17.0 % |   | 0.2514232 ±0.0002244 | 0.00009691 ±0.00000163 | 0.0012 |
| 20F24444         | 17.0 % |   | 0.2946195 ±0.0002748 | 0.00010384 ±0.00000267 | 0.0018 |
| 20F24445         | 17.0 % | ✓ | 0.2643100 ±0.0003225 | 0.00001122 ±0.00000492 | 0.0004 |
| 20F24447         | 17.0 % | ✓ | 0.2595433 ±0.0002328 | 0.00005605 ±0.00000168 | 0.0009 |
| 20F24448         | 17.0 % | ✓ | 0.2580816 ±0.0002347 | 0.00007320 ±0.00000188 | 0.0013 |
| 20F24450         | 17.0 % | ✓ | 0.2617948 ±0.0004886 | 0.00000918 ±0.00001017 | 0.0004 |
| 20F24451         | 17.0 % | ✓ | 0.2638359 ±0.0002388 | 0.00000431 ±0.00000147 | 0.0001 |

| Results          | 40(a)/36(a) ± 2σ      | 40(r)/39(k) ± 2σ | Age ± 2σ (Ma)             | MSWD            |
|------------------|-----------------------|------------------|---------------------------|-----------------|
| Inverse Isochron | 300.98 ±7.45          | 3.79840 ±0.00253 | 11.46 ±0.02               | 5.60            |
| Error Chron      | ±2.48%                | ±0.07%           | ±0.16%                    | 0%              |
|                  |                       |                  | Full External Error ±0.60 |                 |
|                  |                       |                  | Analytical Error ±0.01    |                 |
|                  |                       |                  |                           |                 |
| Statistics       | 2σ Confidence Limit   | 1.58             | Convergence               | 0.0003187423    |
|                  | Error Magnification   | 2.3669           | Number of Iterations      | 2               |
|                  | Number of Data Points | 26               | Calculated Line           | Weighted York-2 |
|                  | Spreading Factor      | 7.3%             |                           |                 |



| Degassing Patterns |        |   | 36Ar(a)<br>[fA] | %1σ   | 36Ar(c)<br>[fA] | %1σ  | 36Ar(ca)<br>[fA] | %1σ    | 36Ar(cl)<br>[fA] | %1σ    | 37Ar(ca)<br>[fA] | %1σ    | 38Ar(a)<br>[fA] | %1σ   | 38Ar(c)<br>[fA] | %1σ  | 38Ar(k)<br>[fA] | %1σ  | 38Ar(ca)<br>[fA] | %1σ    | 38Ar(cl)<br>[fA] | %1σ    | 39Ar(k)<br>[fA] | %1σ  | 39Ar(ca)<br>[fA] | %1σ    | 40Ar(r)<br>[fA] | %1σ  | 40Ar(a)<br>[fA] | %1σ   | 40Ar(c)<br>[fA] | %1σ  | 40Ar(k)<br>[fA] | %1σ  |
|--------------------|--------|---|-----------------|-------|-----------------|------|------------------|--------|------------------|--------|------------------|--------|-----------------|-------|-----------------|------|-----------------|------|------------------|--------|------------------|--------|-----------------|------|------------------|--------|-----------------|------|-----------------|-------|-----------------|------|-----------------|------|
| 20F24408           | 17.0 % | ✓ | 0.0667979       | 0.82  | 0.0000000       | 0.00 | 0.0014090        | 2.76   | 0.0000000        | 0.00   | 5.212872         | 2.76   | 0.0125914       | 0.83  | 0.0000000       | 0.00 | 6.30757         | 0.10 | 0.0009383        | 10.02  | 0.0000000        | 0.00   | 522.2796        | 0.04 | 0.0033493        | 2.90   | 1986.145        | 0.01 | 19.94319        | 0.82  | 0.0000000       | 0.00 | 0.3170237       | 9.65 |
| 20F24409           | 17.0 % | ✓ | 0.0696440       | 0.79  | 0.0000000       | 0.00 | 0.0011906        | 3.35   | 0.0000000        | 0.00   | 4.404803         | 3.34   | 0.0131279       | 0.80  | 0.0000000       | 0.00 | 4.71057         | 0.10 | 0.0007929        | 10.19  | 0.0000000        | 0.00   | 390.0447        | 0.04 | 0.0028301        | 3.47   | 1483.366        | 0.01 | 20.79292        | 0.79  | 0.0000000       | 0.00 | 0.2367571       | 9.65 |
| 20F24411           | 17.0 % | ✓ | 0.1600070       | 0.45  | 0.0000000       | 0.00 | 0.0006803        | 5.67   | 0.0000000        | 0.00   | 2.516951         | 5.66   | 0.0301613       | 0.48  | 0.0000000       | 0.00 | 2.72966         | 0.10 | 0.0004531        | 11.17  | 0.0000000        | 0.00   | 226.0216        | 0.04 | 0.0016171        | 5.74   | 857.199         | 0.03 | 47.77170        | 0.46  | 0.0000000       | 0.00 | 0.1371951       | 9.65 |
| 20F24412           | 17.0 % | ✓ | 0.1235059       | 0.52  | 0.0000000       | 0.00 | 0.0017918        | 2.20   | 0.0000000        | 0.00   | 6.628888         | 2.19   | 0.0232809       | 0.54  | 0.0000000       | 0.00 | 7.51307         | 0.10 | 0.0011932        | 9.88   | 0.0000000        | 0.00   | 622.0978        | 0.04 | 0.0042591        | 2.37   | 2365.990        | 0.01 | 36.87393        | 0.53  | 0.0000000       | 0.00 | 0.3776134       | 9.65 |
| 20F24414           | 17.0 % | ✓ | 0.1738437       | 0.44  | 0.0000000       | 0.00 | 0.0007628        | 4.87   | 0.0000000        | 0.00   | 2.821869         | 4.87   | 0.0327695       | 0.47  | 0.0000000       | 0.00 | 3.10039         | 0.10 | 0.0005079        | 10.79  | 0.0000000        | 0.00   | 256.7186        | 0.04 | 0.0018131        | 4.95   | 975.847         | 0.02 | 51.90278        | 0.46  | 0.0000000       | 0.00 | 0.1558282       | 9.65 |
| 20F24415           | 17.0 % | ✓ | 0.0877170       | 0.69  | 0.0000000       | 0.00 | 0.0014075        | 2.70   | 0.0000000        | 0.00   | 5.207265         | 2.69   | 0.0165346       | 0.70  | 0.0000000       | 0.00 | 5.14639         | 0.10 | 0.0009373        | 10.00  | 0.0000000        | 0.00   | 426.1318        | 0.04 | 0.0033457        | 2.84   | 1621.329        | 0.01 | 26.18877        | 0.69  | 0.0000000       | 0.00 | 0.2586620       | 9.65 |
| 20F24417           | 17.0 % |   | 0.5815648       | 0.27  | 0.0000000       | 0.00 | 0.0009315        | 3.97   | 0.0000000        | 0.00   | 3.446172         | 3.97   | 0.1096250       | 0.32  | 0.0000000       | 0.00 | 3.22738         | 0.10 | 0.0006203        | 10.42  | 0.0000000        | 0.00   | 267.2334        | 0.04 | 0.0022142        | 4.08   | 1009.409        | 0.05 | 173.63197       | 0.29  | 0.0000000       | 0.00 | 0.1622107       | 9.65 |
| 20F24418           | 17.0 % | ✓ | 0.0201808       | 1.81  | 0.0000000       | 0.00 | 0.0008127        | 4.58   | 0.0000000        | 0.00   | 3.006477         | 4.58   | 0.0038041       | 1.81  | 0.0000000       | 0.00 | 2.58775         | 0.10 | 0.0005412        | 10.66  | 0.0000000        | 0.00   | 214.2713        | 0.04 | 0.0019317        | 4.67   | 813.207         | 0.01 | 6.02518         | 1.81  | 0.0000000       | 0.00 | 0.1300627       | 9.65 |
| 20F24420           | 17.0 % | ✓ | 0.0254179       | 1.76  | 0.0000000       | 0.00 | 0.0010627        | 3.68   | 0.0000000        | 0.00   | 3.931605         | 3.68   | 0.0047913       | 1.77  | 0.0000000       | 0.00 | 4.24267         | 0.10 | 0.0007077        | 10.31  | 0.0000000        | 0.00   | 351.3015        | 0.04 | 0.0025261        | 3.79   | 1335.846        | 0.01 | 7.58877         | 1.77  | 0.0000000       | 0.00 | 0.2132400       | 9.65 |
| 20F24421           | 17.0 % | ✓ | 0.0474947       | 1.02  | 0.0000000       | 0.00 | 0.0006699        | 5.75   | 0.0000000        | 0.00   | 2.478483         | 5.74   | 0.0089527       | 1.03  | 0.0000000       | 0.00 | 2.93519         | 0.10 | 0.0004461        | 11.21  | 0.0000000        | 0.00   | 243.0396        | 0.04 | 0.0015924        | 5.82   | 923.804         | 0.02 | 14.18000        | 1.02  | 0.0000000       | 0.00 | 0.1475250       | 9.65 |
| 20F24423           | 17.0 % | ✓ | 0.0361800       | 1.34  | 0.0000000       | 0.00 | 0.0015195        | 2.59   | 0.0000000        | 0.00   | 5.621411         | 2.58   | 0.0068199       | 1.35  | 0.0000000       | 0.00 | 6.84443         | 0.10 | 0.0010119        | 9.97   | 0.0000000        | 0.00   | 566.7324        | 0.04 | 0.0036118        | 2.74   | 2152.559        | 0.01 | 10.80190        | 1.34  | 0.0000000       | 0.00 | 0.3440066       | 9.65 |
| 20F24424           | 17.0 % | ✓ | 0.0522726       | 0.92  | 0.0000000       | 0.00 | 0.0011232        | 3.12   | 0.0000000        | 0.00   | 4.155443         | 3.11   | 0.0098534       | 0.93  | 0.0000000       | 0.00 | 4.61615         | 0.10 | 0.0007480        | 10.12  | 0.0000000        | 0.00   | 382.2263        | 0.04 | 0.0026699        | 3.24   | 1452.462        | 0.01 | 15.60651        | 0.92  | 0.0000000       | 0.00 | 0.2320114       | 9.65 |
| 20F24426           | 17.0 % | ✓ | 0.1014715       | 0.59  | 0.0000000       | 0.00 | 0.0008695        | 4.36   | 0.0000000        | 0.00   | 3.216682         | 4.36   | 0.0191274       | 0.61  | 0.0000000       | 0.00 | 3.56701         | 0.10 | 0.0005790        | 10.57  | 0.0000000        | 0.00   | 295.3559        | 0.04 | 0.0020667        | 4.46   | 1122.526        | 0.02 | 30.29532        | 0.60  | 0.0000000       | 0.00 | 0.1792810       | 9.65 |
| 20F24427           | 17.0 % | ✓ | 0.2536855       | 0.38  | 0.0000000       | 0.00 | 0.0012484        | 3.01   | 0.0000000        | 0.00   | 4.618584         | 3.00   | 0.0478197       | 0.41  | 0.0000000       | 0.00 | 5.62325         | 0.10 | 0.0008313        | 10.09  | 0.0000000        | 0.00   | 465.6167        | 0.04 | 0.0029674        | 3.14   | 1769.035        | 0.02 | 75.74035        | 0.39  | 0.0000000       | 0.00 | 0.2826293       | 9.65 |
| 20F24429           | 17.0 % | ✓ | 0.3011303       | 0.32  | 0.0000000       | 0.00 | 0.0009580        | 3.99   | 0.0000000        | 0.00   | 3.544280         | 3.99   | 0.0567631       | 0.36  | 0.0000000       | 0.00 | 3.90255         | 0.10 | 0.0006380        | 10.42  | 0.0000000        | 0.00   | 323.1390        | 0.04 | 0.0022772        | 4.09   | 1229.018        | 0.03 | 89.90545        | 0.34  | 0.0000000       | 0.00 | 0.1961454       | 9.65 |
| 20F24430           | 17.0 % | ✓ | 0.0332544       | 1.56  | 0.0000000       | 0.00 | 0.0013466        | 2.90   | 0.0000000        | 0.00   | 4.981806         | 2.89   | 0.0062685       | 1.57  | 0.0000000       | 0.00 | 5.81219         | 0.10 | 0.0008967        | 10.05  | 0.0000000        | 0.00   | 481.2608        | 0.04 | 0.0032008        | 3.03   | 1828.136        | 0.01 | 9.92844         | 1.56  | 0.0000000       | 0.00 | 0.2921253       | 9.65 |
| 20F24432           | 17.0 % | ✓ | 0.0408903       | 1.13  | 0.0000000       | 0.00 | 0.0012631        | 3.08   | 0.0000000        | 0.00   | 4.672838         | 3.07   | 0.0077078       | 1.15  | 0.0000000       | 0.00 | 4.52041         | 0.10 | 0.0008411        | 10.11  | 0.0000000        | 0.00   | 374.2993        | 0.04 | 0.0030023        | 3.21   | 1421.576        | 0.01 | 12.20821        | 1.14  | 0.0000000       | 0.00 | 0.2271997       | 9.65 |
| 20F24433           | 17.0 % | ✓ | 0.1553000       | 0.48  | 0.0000000       | 0.00 | 0.0016001        | 2.24   | 0.0000000        | 0.00   | 5.919705         | 2.23   | 0.0292741       | 0.51  | 0.0000000       | 0.00 | 6.16120         | 0.10 | 0.0010655        | 9.88   | 0.0000000        | 0.00   | 510.1601        | 0.04 | 0.0038034        | 2.41   | 1939.494        | 0.01 | 46.36638        | 0.49  | 0.0000000       | 0.00 | 0.3096672       | 9.65 |
| 20F24435           | 17.0 % | ✓ | 0.0084563       | 4.48  | 0.0000000       | 0.00 | 0.0004762        | 7.70   | 0.0000001        | #####  | 1.761904         | 7.70   | 0.0015940       | 4.48  | 0.0000000       | 0.00 | 1.70376         | 0.10 | 0.0003171        | 12.33  | 0.0005414        | #####  | 141.0744        | 0.04 | 0.0011320        | 7.75   | 535.281         | 0.02 | 2.52471         | 4.48  | 0.0000000       | 0.00 | 0.0856322       | 9.65 |
| 20F24436           | 17.0 % | ✓ | 0.0369522       | 1.11  | 0.0000000       | 0.00 | 0.0004206        | 8.40   | 0.0000000        | 0.00   | 1.556192         | 8.40   | 0.0069655       | 1.13  | 0.0000000       | 0.00 | 1.96578         | 0.10 | 0.0002801        | 12.78  | 0.0000000        | 0.00   | 162.7708        | 0.04 | 0.0009999        | 8.45   | 617.416         | 0.02 | 11.03243        | 1.12  | 0.0000000       | 0.00 | 0.0988019       | 9.65 |
| 20F24438           | 17.0 % | ✓ | 0.1791718       | 0.44  | 0.0000000       | 0.00 | 0.0010746        | 3.60   | 0.0000000        | 0.00   | 3.975679         | 3.59   | 0.0337739       | 0.46  | 0.0000000       | 0.00 | 4.24267         | 0.10 | 0.0007156        | 10.28  | 0.0000000        | 0.00   | 351.3020        | 0.04 | 0.0025544        | 3.71   | 1335.585        | 0.02 | 53.49352        | 0.45  | 0.0000000       | 0.00 | 0.2132403       | 9.65 |
| 20F24439           | 17.0 % | ✓ | 0.0326021       | 1.35  | 0.0000000       | 0.00 | 0.0007075        | 5.25   | 0.0000000        | 0.00   | 2.617545         | 5.25   | 0.0061455       | 1.36  | 0.0000000       | 0.00 | 3.02927         | 0.10 | 0.0004712        | 10.97  | 0.0000000        | 0.00   | 250.8298        | 0.04 | 0.0016818        | 5.33   | 952.741         | 0.01 | 9.73369         | 1.35  | 0.0000000       | 0.00 | 0.1522537       | 9.65 |
| 20F24441           | 17.0 % |   | 0.5818004       | 0.26  | 0.0000000       | 0.00 | 0.0005966        | 6.06   | 0.0000020        | 148.79 | 2.207186         | 6.06   | 0.1096694       | 0.31  | 0.0000000       | 0.00 | 2.97219         | 0.10 | 0.0003973        | 11.38  | 0.0085109        | 148.79 | 246.1031        | 0.04 | 0.0014181        | 6.13   | 857.079         | 0.06 | 173.70233       | 0.28  | 0.0000000       | 0.00 | 0.1493846       | 9.65 |
| 20F24442           | 17.0 % |   | 0.0569606       | 0.84  | 0.0000000       | 0.00 | 0.0004893        | 6.90   | 0.0000070        | 36.91  | 1.810127         | 6.90   | 0.0107371       | 0.86  | 0.0000000       | 0.00 | 1.78463         | 0.10 | 0.0003258        | 11.85  | 0.0298137        | 36.92  | 147.7712        | 0.04 | 0.0011630        | 6.96   | 570.733         | 0.03 | 17.00616        | 0.85  | 0.0000000       | 0.00 | 0.0896971       | 9.65 |
| 20F24444           | 17.0 % |   | 0.0294478       | 1.29  | 0.0000000       | 0.00 | 0.0001875        | 19.77  | 0.0000000        | 0.00   | 0.693623         | 19.77  | 0.0055509       | 1.30  | 0.0000000       | 0.00 | 1.00908         | 0.10 | 0.0001249        | 21.99  | 0.0000000        | 0.00   | 83.5536         | 0.05 | 0.0004457        | 19.79  | 274.806         | 0.04 | 8.79195         | 1.29  | 0.0000000       | 0.00 | 0.0507170       | 9.65 |
| 20F24445           | 17.0 % | ✓ | 0.0012844       | 21.92 | 0.0000000       | 0.00 | 0.0000860        | 47.44  | 0.0000000        | 0.00   | 0.318212         | 47.44  | 0.0002421       | 21.92 | 0.0000000       | 0.00 | 0.36545         | 0.11 | 0.0000573        | 48.41  | 0.0000000        | 0.00   | 30.2598         | 0.06 | 0.0002045        | 47.45  | 114.869         | 0.08 | 0.38348         | 21.92 | 0.0000000       | 0.00 | 0.0183677       | 9.65 |
| 20F24447           | 17.0 % | ✓ | 0.0271532       | 1.50  | 0.0000000       | 0.00 | 0.0003335        | 10.98  | 0.0000000        | 0.00   | 1.233916         | 10.98  | 0.0051184       | 1.51  | 0.0000000       | 0.00 | 1.51852         | 0.10 | 0.0002221        | 14.60  | 0.0000000        | 0.00   | 125.7368        | 0.04 | 0.0007928        | 11.01  | 476.347         | 0.03 | 8.10687         | 1.50  | 0.0000000       | 0.00 | 0.0763222       | 9.65 |
| 20F24448           | 17.0 % | ✓ | 0.0298482       | 1.29  | 0.0000000       | 0.00 | 0.0002829        | 12.87  | 0.0000000        | 0.00   | 1.046434         | 12.87  | 0.0056264       | 1.30  | 0.0000000       | 0.00 | 1.27094         | 0.10 | 0.0001884        | 16.07  | 0.0000000        | 0.00   | 105.2364        | 0.04 | 0.0006723        | 12.90  | 398.853         | 0.03 | 8.91148         | 1.29  | 0.0000000       | 0.00 | 0.0638785       | 9.65 |
| 20F24450           | 17.0 % | ✓ | 0.0004772       | 55.42 | 0.0000000       | 0.00 | 0.0000152        | 261.81 | 0.0000000        | 0.00   | 0.056236         | 261.81 | 0.0000900       | 55.42 | 0.0000000       | 0.00 | 0.16440         | 0.12 | 0.0000101        | 261.99 | 0.0000000        | 0.00   | 13.6129         | 0.08 | 0.0000361        | 261.82 | 51.856          | 0.16 | 0.14248         | 55.42 | 0.0000000       | 0.00 | 0.0082630       | 9.65 |
| 20F24451           | 17.0 % | ✓ | 0.0016990       | 17.06 | 0.0000000       | 0.00 | 0.0002767        | 13.01  | 0.0000000        | 0.00   | 1.023687         | 13.00  | 0.0003203       | 17.06 | 0.0000000       | 0.00 | 1.25734         | 0.10 | 0.0001843        | 16.18  | 0.0000000        | 0.00   | 104.1103        | 0.04 | 0.0006577        | 13.04  | 395.110         | 0.02 | 0.50725         | 17.06 | 0.0000000       | 0.00 | 0.0631950       | 9.65 |
| Σ                  |        |   | 3.3102447       |       |                 |      |                  |        |                  |        |                  |        |                 |       |                 |      |                 |      |                  |        |                  |        |                 |      |                  |        |                 |      |                 |       |                 |      |                 |      |

| Additional Parameters |        |   | 40Ar/39Ar | 1σ       | 37Ar/39Ar | 1σ       | 36Ar/39Ar | 1σ       | Time (days) | 37Ar (decay) | 39Ar (decay) | 40Ar (moles) |
|-----------------------|--------|---|-----------|----------|-----------|----------|-----------|----------|-------------|--------------|--------------|--------------|
| 20F24408              | 17.0 % | ✓ | 3.841605  | 0.001644 | 0.009981  | 0.000275 | 0.000131  | 0.000001 | 143.887     | 17.193543    | 1.00101667   | 7.103E-11    |
| 20F24409              | 17.0 % | ✓ | 3.856956  | 0.001661 | 0.011293  | 0.000377 | 0.000182  | 0.000001 | 143.894     | 17.195665    | 1.00101671   | 5.326E-11    |
| 20F24411              | 17.0 % | ✓ | 4.004489  | 0.001741 | 0.011136  | 0.000631 | 0.000711  | 0.000003 | 143.906     | 17.199675    | 1.00101680   | 3.204E-11    |
| 20F24412              | 17.0 % | ✓ | 3.863099  | 0.001655 | 0.010656  | 0.000233 | 0.000201  | 0.000001 | 143.912     | 17.201799    | 1.00101684   | 8.507E-11    |
| 20F24414              | 17.0 % | ✓ | 4.003989  | 0.001743 | 0.010992  | 0.000535 | 0.000680  | 0.000003 | 143.924     | 17.205811    | 1.00101692   | 3.639E-11    |
| 20F24415              | 17.0 % | ✓ | 3.866793  | 0.001662 | 0.012220  | 0.000329 | 0.000209  | 0.000001 | 143.930     | 17.207935    | 1.00101697   | 5.833E-11    |
| 20F24417              | 17.0 % |   | 4.427565  | 0.001920 | 0.012896  | 0.000512 | 0.002180  | 0.000006 | 143.942     | 17.211948    | 1.00101705   | 4.189E-11    |
| 20F24418              | 17.0 % | ✓ | 3.823914  | 0.001666 | 0.014031  | 0.000642 | 0.000098  | 0.000002 | 143.947     | 17.213837    | 1.00101709   | 2.901E-11    |
| 20F24420              | 17.0 % | ✓ | 3.824745  | 0.001652 | 0.011191  | 0.000411 | 0.000075  | 0.000001 | 143.959     | 17.217851    | 1.00101717   | 4.757E-11    |
| 20F24421              | 17.0 % | ✓ | 3.859968  | 0.001678 | 0.010198  | 0.000586 | 0.000198  | 0.000002 | 143.965     | 17.219977    | 1.00101722   | 3.321E-11    |
| 20F24423              | 17.0 % | ✓ | 3.817835  | 0.001637 | 0.009919  | 0.000256 | 0.000067  | 0.000001 | 143.977     | 17.223993    | 1.00101730   | 7.660E-11    |
| 20F24424              | 17.0 % | ✓ | 3.841416  | 0.001652 | 0.010872  | 0.000338 | 0.000140  | 0.000001 | 143.983     | 17.226119    | 1.00101735   | 5.198E-11    |
| 20F24426              | 17.0 % | ✓ | 3.903738  | 0.001690 | 0.010891  | 0.000475 | 0.000346  | 0.000002 | 143.995     | 17.230136    | 1.00101743   | 4.082E-11    |
| 20F24427              | 17.0 % | ✓ | 3.962585  | 0.001700 | 0.009919  | 0.000298 | 0.000548  | 0.000002 | 144.001     | 17.232027    | 1.00101747   | 6.532E-11    |
| 20F24429              | 17.0 % | ✓ | 4.082176  | 0.001760 | 0.010968  | 0.000437 | 0.000935  | 0.000003 | 144.013     | 17.236282    | 1.00101756   | 4.670E-11    |
| 20F24430              | 17.0 % | ✓ | 3.819850  | 0.001642 | 0.010352  | 0.000299 | 0.000072  | 0.000001 | 144.019     | 17.238174    | 1.00101760   | 6.508E-11    |
| 20F24432              | 17.0 % | ✓ | 3.831160  | 0.001651 | 0.012484  | 0.000384 | 0.000113  | 0.000001 | 144.031     | 17.242194    | 1.00101768   | 5.076E-11    |
| 20F24433              | 17.0 % | ✓ | 3.893201  | 0.001669 | 0.011604  | 0.000259 | 0.000308  | 0.000001 | 144.037     | 17.244323    | 1.00101772   | 7.031E-11    |
| 20F24435              | 17.0 % | ✓ | 3.812790  | 0.001695 | 0.012489  | 0.000961 | 0.000063  | 0.000003 | 144.049     | 17.248344    | 1.00101781   | 1.904E-11    |
| 20F24436              | 17.0 % | ✓ | 3.861527  | 0.001716 | 0.009561  | 0.000803 | 0.000230  | 0.000003 | 144.055     | 17.250474    | 1.00101785   | 2.225E-11    |
| 20F24438              | 17.0 % | ✓ | 3.954664  | 0.001710 | 0.011317  | 0.000406 | 0.000513  | 0.000002 | 144.067     | 17.254497    | 1.00101793   | 4.918E-11    |
| 20F24439              | 17.0 % | ✓ | 3.837743  | 0.001673 | 0.010435  | 0.000547 | 0.000133  | 0.000002 | 144.072     | 17.256390    | 1.00101797   | 3.408E-11    |
| 20F24441              | 17.0 % |   | 4.188997  | 0.001825 | 0.008968  | 0.000543 | 0.002366  | 0.000006 | 144.085     | 17.260651    | 1.00101806   | 3.649E-11    |
| 20F24442              | 17.0 % |   | 3.977934  | 0.001774 | 0.012249  | 0.000845 | 0.000389  | 0.000003 | 144.090     | 17.262545    | 1.00101810   | 2.081E-11    |
| 20F24444              | 17.0 % |   | 3.394797  | 0.001582 | 0.008301  | 0.001641 | 0.000355  | 0.000005 | 144.102     | 17.266571    | 1.00101818   | 1.004E-11    |
| 20F24445              | 17.0 % | ✓ | 3.784018  | 0.002308 | 0.010516  | 0.004989 | 0.000040  | 0.000009 | 144.108     | 17.268703    | 1.00101823   | 4.053E-12    |
| 20F24447              | 17.0 % | ✓ | 3.853505  | 0.001727 | 0.009813  | 0.001077 | 0.000219  | 0.000003 | 144.120     | 17.272730    | 1.00101831   | 1.715E-11    |
| 20F24448              | 17.0 % | ✓ | 3.875326  | 0.001761 | 0.009944  | 0.001280 | 0.000286  | 0.000004 | 144.126     | 17.274863    | 1.00101836   | 1.444E-11    |
| 20F24450              | 17.0 % | ✓ | 3.820382  | 0.003564 | 0.004131  | 0.010816 | 0.000036  | 0.000019 | 144.138     | 17.278891    | 1.00101844   | 1.841E-12    |
| 20F24451              | 17.0 % | ✓ | 3.790818  | 0.001715 | 0.009833  | 0.001279 | 0.000014  | 0.000003 | 144.144     | 17.280787    | 1.00101848   | 1.397E-11    |

| Procedure<br>Blanks |        | 36Ar ± 1σ (SE)<br>[fA] | 37Ar ± 1σ (SE)<br>[fA] | 38Ar ± 1σ (SE)<br>[fA] | 39Ar ± 1σ (SE)<br>[fA] | 40Ar ± 1σ (SE)<br>[fA] |
|---------------------|--------|------------------------|------------------------|------------------------|------------------------|------------------------|
| 20F24408            | 17.0 % | 0.0053474 ±0.0001878   | 0.0162563 ±0.0057620   | 0.0027093 ±0.0061707   | 0.0419785 ±0.0065337   | 1.2895048 ±0.0146347   |
| 20F24409            | 17.0 % | 0.0053474 ±0.0001878   | 0.0162563 ±0.0057620   | 0.0027093 ±0.0061707   | 0.0419785 ±0.0065337   | 1.2895048 ±0.0146347   |
| 20F24411            | 17.0 % | 0.0049819 ±0.0002188   | 0.0100769 ±0.0060596   | 0.0037068 ±0.0059309   | 0.0430573 ±0.0056629   | 1.2543838 ±0.0144582   |
| 20F24412            | 17.0 % | 0.0049819 ±0.0002188   | 0.0100769 ±0.0060596   | 0.0037068 ±0.0059309   | 0.0430573 ±0.0056629   | 1.2543838 ±0.0144582   |
| 20F24414            | 17.0 % | 0.0070925 ±0.0002079   | 0.0250801 ±0.0055857   | 0.0022622 ±0.0065911   | 0.0363265 ±0.0059265   | 1.7478428 ±0.0152044   |
| 20F24415            | 17.0 % | 0.0070925 ±0.0002079   | 0.0250801 ±0.0055857   | 0.0022622 ±0.0065911   | 0.0363265 ±0.0059265   | 1.7478428 ±0.0152044   |
| 20F24417            | 17.0 % | 0.0049060 ±0.0001679   | 0.0171799 ±0.0048260   | 0.0066610 ±0.0062697   | 0.0194516 ±0.0063220   | 1.2099745 ±0.0166535   |
| 20F24418            | 17.0 % | 0.0049060 ±0.0001679   | 0.0171799 ±0.0048260   | 0.0066610 ±0.0062697   | 0.0194516 ±0.0063220   | 1.2099745 ±0.0166535   |
| 20F24420            | 17.0 % | 0.0071377 ±0.0001987   | 0.0125243 ±0.0058198   | 0.0145232 ±0.0061572   | 0.0077370 ±0.0055440   | 1.6840691 ±0.0154606   |
| 20F24421            | 17.0 % | 0.0071377 ±0.0001987   | 0.0125243 ±0.0058198   | 0.0145232 ±0.0061572   | 0.0077370 ±0.0055440   | 1.6840691 ±0.0154606   |
| 20F24423            | 17.0 % | 0.0049541 ±0.0001666   | 0.0153587 ±0.0056169   | 0.0033892 ±0.0068226   | 0.1218942 ±0.0062865   | 1.6739017 ±0.0130660   |
| 20F24424            | 17.0 % | 0.0049541 ±0.0001666   | 0.0153587 ±0.0056169   | 0.0033892 ±0.0068226   | 0.1218942 ±0.0062865   | 1.6739017 ±0.0130660   |
| 20F24426            | 17.0 % | 0.0048678 ±0.0001934   | 0.0172305 ±0.0054158   | 0.0035814 ±0.0066920   | 0.1282346 ±0.0067679   | 1.8435037 ±0.0160803   |
| 20F24427            | 17.0 % | 0.0048678 ±0.0001934   | 0.0172305 ±0.0054158   | 0.0035814 ±0.0066920   | 0.1282346 ±0.0067679   | 1.8435037 ±0.0160803   |
| 20F24429            | 17.0 % | 0.0054558 ±0.0002062   | 0.0175532 ±0.0057440   | 0.0032088 ±0.0070776   | 0.0387352 ±0.0066300   | 1.3811736 ±0.0155653   |
| 20F24430            | 17.0 % | 0.0054558 ±0.0002062   | 0.0175532 ±0.0057440   | 0.0032088 ±0.0070776   | 0.0387352 ±0.0066300   | 1.3811736 ±0.0155653   |
| 20F24432            | 17.0 % | 0.0047147 ±0.0001800   | 0.0165787 ±0.0055600   | 0.0073589 ±0.0069045   | 0.0224121 ±0.0061025   | 1.1291683 ±0.0149212   |
| 20F24433            | 17.0 % | 0.0047147 ±0.0001800   | 0.0165787 ±0.0055600   | 0.0073589 ±0.0069045   | 0.0224121 ±0.0061025   | 1.1291683 ±0.0149212   |
| 20F24435            | 17.0 % | 0.0049113 ±0.0001893   | 0.0204595 ±0.0051889   | 0.0129138 ±0.0067254   | 0.0238152 ±0.0062507   | 1.2162792 ±0.0154866   |
| 20F24436            | 17.0 % | 0.0049113 ±0.0001893   | 0.0204595 ±0.0051889   | 0.0129138 ±0.0067254   | 0.0238152 ±0.0062507   | 1.2162792 ±0.0154866   |
| 20F24438            | 17.0 % | 0.0056003 ±0.0001955   | 0.0146377 ±0.0058815   | 0.0001294 ±0.0064335   | 0.0367515 ±0.0062166   | 1.3645124 ±0.0162838   |
| 20F24439            | 17.0 % | 0.0056003 ±0.0001955   | 0.0146377 ±0.0058815   | 0.0001294 ±0.0064335   | 0.0367515 ±0.0062166   | 1.3645124 ±0.0162838   |
| 20F24441            | 17.0 % | 0.0043332 ±0.0001870   | 0.0163033 ±0.0051569   | 0.0112890 ±0.0071939   | 0.0041976 ±0.0059079   | 1.0517210 ±0.0159272   |
| 20F24442            | 17.0 % | 0.0043332 ±0.0001870   | 0.0163033 ±0.0051569   | 0.0112890 ±0.0071939   | 0.0041976 ±0.0059079   | 1.0517210 ±0.0159272   |
| 20F24444            | 17.0 % | 0.0060070 ±0.0001904   | 0.0166836 ±0.0059526   | 0.0028617 ±0.0065258   | 0.0702091 ±0.0064072   | 1.7609386 ±0.0153393   |
| 20F24445            | 17.0 % | 0.0060070 ±0.0001904   | 0.0166836 ±0.0059526   | 0.0028617 ±0.0065258   | 0.0702091 ±0.0064072   | 1.7609386 ±0.0153393   |
| 20F24447            | 17.0 % | 0.0043332 ±0.0001870   | 0.0163033 ±0.0051569   | 0.0112890 ±0.0071939   | 0.0041976 ±0.0059079   | 1.0517210 ±0.0159272   |
| 20F24448            | 17.0 % | 0.0043332 ±0.0001870   | 0.0163033 ±0.0051569   | 0.0112890 ±0.0071939   | 0.0041976 ±0.0059079   | 1.0517210 ±0.0159272   |
| 20F24450            | 17.0 % | 0.0060070 ±0.0001904   | 0.0166836 ±0.0059526   | 0.0028617 ±0.0065258   | 0.0702091 ±0.0064072   | 1.7609386 ±0.0153393   |
| 20F24451            | 17.0 % | 0.0060070 ±0.0001904   | 0.0166836 ±0.0059526   | 0.0028617 ±0.0065258   | 0.0702091 ±0.0064072   | 1.7609386 ±0.0153393   |

| Intercept Values |        | 36Ar ± 1σ (SE)<br>[fA] | r2     | Regression<br>(type,n) | 37Ar ± 1σ (SE)<br>[fA] | r2     | Regression<br>(type,n) | 38Ar ± 1σ (SE)<br>[fA] | r2     | Regression<br>(type,n) | 39Ar ± 1σ (SE)<br>[fA] | r2     | Regression<br>(type,n) | 40Ar ± 1σ (SE)<br>[fA] | r2     | Regression<br>(type,n) |
|------------------|--------|------------------------|--------|------------------------|------------------------|--------|------------------------|------------------------|--------|------------------------|------------------------|--------|------------------------|------------------------|--------|------------------------|
| 20F24408         | 17.0 % | 0.0721466 ±0.0004862   | 0.9627 | EXP 147 of 150         | 0.2869010 ±0.0059068   | 0.1412 | EXP 149 of 150         | 6.2706153 ±0.0079035   | 0.9852 | EXP 150 of 150         | 521.77704 ±0.02590     | 1.0000 | EXP 150 of 150         | 2007.69444 ±0.06070    | 1.0000 | EXP 150 of 150         |
| 20F24409         | 17.0 % | 0.0747201 ±0.0004870   | 0.9444 | EXP 150 of 150         | 0.2398757 ±0.0062327   | 0.1619 | EXP 150 of 150         | 4.7030054 ±0.0067503   | 0.9802 | EXP 145 of 150         | 389.68026 ±0.02472     | 1.0000 | EXP 150 of 150         | 1505.68563 ±0.05565    | 1.0000 | EXP 150 of 150         |
| 20F24411         | 17.0 % | 0.1623528 ±0.0006156   | 0.0600 | EXP 150 of 150         | 0.1362455 ±0.0056176   | 0.0620 | EXP 150 of 150         | 2.7437549 ±0.0067416   | 0.9439 | EXP 150 of 150         | 225.82913 ±0.01824     | 0.9999 | EXP 150 of 150         | 906.36194 ±0.04016     | 1.0000 | EXP 147 of 150         |
| 20F24412         | 17.0 % | 0.1276936 ±0.0005498   | 0.9528 | EXP 150 of 150         | 0.3752445 ±0.0056320   | 0.3245 | EXP 150 of 150         | 7.4810996 ±0.0074123   | 0.9907 | EXP 150 of 150         | 621.49236 ±0.03380     | 1.0000 | EXP 150 of 150         | 2404.49607 ±0.07334    | 1.0000 | EXP 150 of 150         |
| 20F24414         | 17.0 % | 0.1780952 ±0.0006669   | 0.0865 | EXP 149 of 150         | 0.1389101 ±0.0056577   | 0.0588 | EXP 150 of 150         | 3.1119989 ±0.0069015   | 0.9547 | EXP 149 of 150         | 256.48731 ±0.02107     | 0.9999 | EXP 150 of 150         | 1029.65332 ±0.05145    | 1.0000 | EXP 148 of 150         |
| 20F24415         | 17.0 % | 0.0943775 ±0.0005296   | 0.9345 | EXP 150 of 150         | 0.2774978 ±0.0057853   | 0.2242 | EXP 149 of 150         | 5.1151725 ±0.0065509   | 0.9853 | EXP 147 of 150         | 425.72428 ±0.02440     | 1.0000 | EXP 150 of 150         | 1649.52424 ±0.06429    | 1.0000 | EXP 150 of 150         |
| 20F24417         | 17.0 % | 0.5753799 ±0.0012108   | 0.9197 | EXP 150 of 150         | 0.1830198 ±0.0062577   | 0.1041 | EXP 148 of 150         | 3.2951202 ±0.0062282   | 0.9649 | EXP 150 of 150         | 266.97459 ±0.02079     | 0.9999 | EXP 150 of 150         | 1184.41282 ±0.04648    | 1.0000 | EXP 150 of 150         |
| 20F24418         | 17.0 % | 0.0254662 ±0.0003113   | 0.9658 | EXP 150 of 150         | 0.1574573 ±0.0063253   | 0.1618 | EXP 146 of 150         | 2.5808302 ±0.0069602   | 0.9334 | EXP 149 of 150         | 214.06781 ±0.01737     | 0.9999 | EXP 149 of 150         | 820.57233 ±0.03911     | 1.0000 | EXP 148 of 150         |
| 20F24420         | 17.0 % | 0.0330717 ±0.0003873   | 0.9713 | EXP 149 of 150         | 0.2157974 ±0.0059697   | 0.1336 | EXP 150 of 150         | 4.2060160 ±0.0070659   | 0.9739 | EXP 150 of 150         | 350.94300 ±0.02546     | 1.0000 | EXP 150 of 150         | 1345.33209 ±0.04751    | 1.0000 | EXP 149 of 150         |
| 20F24421         | 17.0 % | 0.0543082 ±0.0004198   | 0.9286 | EXP 150 of 150         | 0.1313919 ±0.0058398   | 0.0757 | EXP 150 of 150         | 2.9107632 ±0.0065517   | 0.9552 | EXP 150 of 150         | 242.79383 ±0.01998     | 0.9999 | EXP 150 of 150         | 939.81537 ±0.03917     | 1.0000 | EXP 147 of 150         |
| 20F24423         | 17.0 % | 0.0418755 ±0.0004375   | 0.9817 | EXP 150 of 150         | 0.3109794 ±0.0061158   | 0.2550 | EXP 150 of 150         | 6.8105656 ±0.0072955   | 0.9894 | EXP 150 of 150         | 566.26300 ±0.03000     | 1.0000 | EXP 150 of 150         | 2165.37860 ±0.07477    | 1.0000 | EXP 150 of 150         |
| 20F24424         | 17.0 % | 0.0572479 ±0.0004287   | 0.9648 | EXP 150 of 150         | 0.2258463 ±0.0048712   | 0.2243 | EXP 148 of 150         | 4.5837150 ±0.0071021   | 0.9767 | EXP 150 of 150         | 381.94965 ±0.02378     | 1.0000 | EXP 150 of 150         | 1469.97466 ±0.05042    | 1.0000 | EXP 150 of 150         |
| 20F24426         | 17.0 % | 0.1050965 ±0.0005268   | 0.8447 | EXP 150 of 150         | 0.1694400 ±0.0060217   | 0.0452 | EXP 150 of 150         | 3.5437552 ±0.0061866   | 0.9723 | EXP 145 of 150         | 295.17610 ±0.02146     | 1.0000 | EXP 149 of 150         | 1154.84361 ±0.04836    | 1.0000 | EXP 150 of 150         |
| 20F24427         | 17.0 % | 0.2545401 ±0.0008078   | 0.3060 | EXP 150 of 150         | 0.2507658 ±0.0058449   | 0.1986 | EXP 150 of 150         | 5.6458563 ±0.0076173   | 0.9833 | EXP 150 of 150         | 465.25903 ±0.02583     | 1.0000 | EXP 150 of 150         | 1846.90103 ±0.06193    | 1.0000 | EXP 150 of 150         |
| 20F24429         | 17.0 % | 0.3013092 ±0.0007875   | 0.5379 | EXP 150 of 150         | 0.1880552 ±0.0057839   | 0.1289 | EXP 149 of 150         | 3.9356308 ±0.0063096   | 0.9766 | EXP 148 of 150         | 322.84075 ±0.02000     | 1.0000 | EXP 147 of 150         | 1320.50091 ±0.05704    | 1.0000 | EXP 150 of 150         |
| 20F24430         | 17.0 % | 0.0393427 ±0.0004592   | 0.9764 | EXP 150 of 150         | 0.2714163 ±0.0059409   | 0.1676 | EXP 150 of 150         | 5.7507298 ±0.0069074   | 0.9857 | EXP 150 of 150         | 480.79741 ±0.02870     | 1.0000 | EXP 150 of 150         | 1839.73744 ±0.06735    | 1.0000 | EXP 150 of 150         |
| 20F24432         | 17.0 % | 0.0459981 ±0.0004096   | 0.9656 | EXP 150 of 150         | 0.2544059 ±0.0060875   | 0.1191 | EXP 150 of 150         | 4.4847893 ±0.0061969   | 0.9822 | EXP 150 of 150         | 373.93164 ±0.02492     | 1.0000 | EXP 149 of 150         | 1435.14103 ±0.04960    | 1.0000 | EXP 147 of 150         |
| 20F24433         | 17.0 % | 0.1583766 ±0.0006561   | 0.8865 | EXP 150 of 150         | 0.3266711 ±0.0050490   | 0.2543 | EXP 145 of 150         | 6.1662378 ±0.0069632   | 0.9881 | EXP 148 of 150         | 509.65060 ±0.02680     | 1.0000 | EXP 150 of 150         | 1987.29966 ±0.06880    | 1.0000 | EXP 147 of 150         |
| 20F24435         | 17.0 % | 0.0136595 ±0.0003163   | 0.9563 | EXP 150 of 150         | 0.0816794 ±0.0058880   | 0.0191 | EXP 146 of 150         | 1.6931802 ±0.0067504   | 0.8631 | EXP 149 of 150         | 140.95121 ±0.01516     | 0.9999 | EXP 150 of 150         | 539.10775 ±0.03229     | 0.9999 | EXP 150 of 150         |
| 20F24436         | 17.0 % | 0.0415127 ±0.0003492   | 0.9262 | EXP 150 of 150         | 0.0697430 ±0.0055091   | 0.0020 | EXP 150 of 150         | 1.9500372 ±0.0073451   | 0.8754 | EXP 150 of 150         | 162.62465 ±0.01799     | 0.9999 | EXP 150 of 150         | 629.76398 ±0.03750     | 1.0000 | EXP 150 of 150         |
| 20F24438         | 17.0 % | 0.1821265 ±0.0006757   | 0.4322 | EXP 150 of 150         | 0.2157532 ±0.0057360   | 0.1180 | EXP 150 of 150         | 4.2279681 ±0.0069463   | 0.9756 | EXP 148 of 150         | 350.97236 ±0.02587     | 1.0000 | EXP 150 of 150         | 1390.65614 ±0.05427    | 1.0000 | EXP 150 of 150         |
| 20F24439         | 17.0 % | 0.0382224 ±0.0003773   | 0.9522 | EXP 150 of 150         | 0.1370326 ±0.0053178   | 0.1211 | EXP 149 of 150         | 3.0106838 ±0.0070411   | 0.9493 | EXP 150 of 150         | 250.60476 ±0.02138     | 0.9999 | EXP 149 of 150         | 963.99129 ±0.04611     | 1.0000 | EXP 150 of 150         |
| 20F24441         | 17.0 % | 0.5747119 ±0.0011124   | 0.9355 | EXP 150 of 150         | 0.1115578 ±0.0057516   | 0.0497 | EXP 150 of 150         | 3.0792688 ±0.0068040   | 0.9561 | EXP 149 of 150         | 245.85022 ±0.02114     | 0.9999 | EXP 150 of 150         | 1031.98282 ±0.04640    | 1.0000 | EXP 150 of 150         |
| 20F24442         | 17.0 % | 0.0606042 ±0.0004185   | 0.8546 | EXP 150 of 150         | 0.0885448 ±0.0050530   | 0.0048 | EXP 149 of 150         | 1.8140976 ±0.0068682   | 0.8817 | EXP 150 of 150         | 147.62130 ±0.01710     | 0.9999 | EXP 150 of 150         | 588.88034 ±0.03488     | 1.0000 | EXP 150 of 150         |
| 20F24444         | 17.0 % | 0.0350307 ±0.0003121   | 0.8631 | EXP 150 of 150         | 0.0234838 ±0.0052525   | 0.0013 | EXP 148 of 150         | 1.0041227 ±0.0070659   | 0.6706 | EXP 150 of 150         | 83.53649 ±0.01216      | 0.9998 | EXP 150 of 150         | 285.41002 ±0.02469     | 0.9999 | EXP 150 of 150         |
| 20F24445         | 17.0 % | 0.0048334 ±0.0001954   | 0.9547 | EXP 149 of 150         | 0.0017416 ±0.0064008   | 0.0020 | EXP 150 of 150         | 0.3614481 ±0.0064800   | 0.2096 | EXP 149 of 150         | 30.29838 ±0.00917      | 0.9990 | EXP 150 of 150         | 116.26518 ±0.02221     | 0.9985 | EXP 150 of 150         |
| 20F24447         | 17.0 % | 0.0312526 ±0.0003468   | 0.8970 | EXP 150 of 150         | 0.0551268 ±0.0058976   | 0.0157 | EXP 147 of 150         | 1.5118903 ±0.0064473   | 0.8432 | EXP 150 of 150         | 125.60967 ±0.01452     | 0.9999 | EXP 149 of 150         | 485.58208 ±0.03295     | 0.9999 | EXP 150 of 150         |
| 20F24448         | 17.0 % | 0.0338423 ±0.0003208   | 0.8907 | EXP 150 of 150         | 0.0442662 ±0.0058383   | 0.0215 | EXP 150 of 150         | 1.2552844 ±0.0061516   | 0.8095 | EXP 147 of 150         | 105.13072 ±0.01354     | 0.9998 | EXP 149 of 150         | 408.87980 ±0.03050     | 0.9999 | EXP 150 of 150         |
| 20F24450         | 17.0 % | 0.0064893 ±0.0001713   | 0.9524 | EXP 150 of 150         | 0.0134293 ±0.0060959   | 0.0000 | EXP 150 of 150         | 0.1519041 ±0.0067841   | 0.0155 | EXP 149 of 150         | 13.66886 ±0.00712      | 0.9968 | EXP 150 of 150         | 53.76762 ±0.01705      | 0.8929 | EXP 150 of 150         |
| 20F24451         | 17.0 % | 0.0046141 ±0.0002075   | 0.9687 | EXP 150 of 150         | 0.0425488 ±0.0048827   | 0.0348 | EXP 149 of 150         | 1.2461886 ±0.0070670   | 0.7714 | EXP 149 of 150         | 104.07177 ±0.01202     | 0.9999 | EXP 148 of 150         | 396.42669 ±0.03145     | 0.9999 | EXP 149 of 150         |

| Project Info |        | Analyst     | Irradiation | X-pos | Y-pos | Z/H-pos | Project                | Experiment | Nmb |
|--------------|--------|-------------|-------------|-------|-------|---------|------------------------|------------|-----|
| 20F24408     | 17.0 % | Dan Miggins | 20-OSU-01   | 0.00  | 0.00  | 8.18    | Oregon\Swenton (20-01) | 20F24404   | 01  |
| 20F24409     | 17.0 % | Dan Miggins | 20-OSU-01   | 0.00  | 0.00  | 8.18    | Oregon\Swenton (20-01) | 20F24404   | 01  |
| 20F24411     | 17.0 % | Dan Miggins | 20-OSU-01   | 0.00  | 0.00  | 8.18    | Oregon\Swenton (20-01) | 20F24404   | 01  |
| 20F24412     | 17.0 % | Dan Miggins | 20-OSU-01   | 0.00  | 0.00  | 8.18    | Oregon\Swenton (20-01) | 20F24404   | 01  |
| 20F24414     | 17.0 % | Dan Miggins | 20-OSU-01   | 0.00  | 0.00  | 8.18    | Oregon\Swenton (20-01) | 20F24404   | 01  |
| 20F24415     | 17.0 % | Dan Miggins | 20-OSU-01   | 0.00  | 0.00  | 8.18    | Oregon\Swenton (20-01) | 20F24404   | 01  |
| 20F24417     | 17.0 % | Dan Miggins | 20-OSU-01   | 0.00  | 0.00  | 8.18    | Oregon\Swenton (20-01) | 20F24404   | 01  |
| 20F24418     | 17.0 % | Dan Miggins | 20-OSU-01   | 0.00  | 0.00  | 8.18    | Oregon\Swenton (20-01) | 20F24404   | 01  |
| 20F24420     | 17.0 % | Dan Miggins | 20-OSU-01   | 0.00  | 0.00  | 8.18    | Oregon\Swenton (20-01) | 20F24404   | 01  |
| 20F24421     | 17.0 % | Dan Miggins | 20-OSU-01   | 0.00  | 0.00  | 8.18    | Oregon\Swenton (20-01) | 20F24404   | 01  |
| 20F24423     | 17.0 % | Dan Miggins | 20-OSU-01   | 0.00  | 0.00  | 8.18    | Oregon\Swenton (20-01) | 20F24404   | 01  |
| 20F24424     | 17.0 % | Dan Miggins | 20-OSU-01   | 0.00  | 0.00  | 8.18    | Oregon\Swenton (20-01) | 20F24404   | 01  |
| 20F24426     | 17.0 % | Dan Miggins | 20-OSU-01   | 0.00  | 0.00  | 8.18    | Oregon\Swenton (20-01) | 20F24404   | 01  |
| 20F24427     | 17.0 % | Dan Miggins | 20-OSU-01   | 0.00  | 0.00  | 8.18    | Oregon\Swenton (20-01) | 20F24404   | 01  |
| 20F24429     | 17.0 % | Dan Miggins | 20-OSU-01   | 0.00  | 0.00  | 8.18    | Oregon\Swenton (20-01) | 20F24404   | 01  |
| 20F24430     | 17.0 % | Dan Miggins | 20-OSU-01   | 0.00  | 0.00  | 8.18    | Oregon\Swenton (20-01) | 20F24404   | 01  |
| 20F24432     | 17.0 % | Dan Miggins | 20-OSU-01   | 0.00  | 0.00  | 8.18    | Oregon\Swenton (20-01) | 20F24404   | 01  |
| 20F24433     | 17.0 % | Dan Miggins | 20-OSU-01   | 0.00  | 0.00  | 8.18    | Oregon\Swenton (20-01) | 20F24404   | 01  |
| 20F24435     | 17.0 % | Dan Miggins | 20-OSU-01   | 0.00  | 0.00  | 8.18    | Oregon\Swenton (20-01) | 20F24404   | 01  |
| 20F24436     | 17.0 % | Dan Miggins | 20-OSU-01   | 0.00  | 0.00  | 8.18    | Oregon\Swenton (20-01) | 20F24404   | 01  |
| 20F24438     | 17.0 % | Dan Miggins | 20-OSU-01   | 0.00  | 0.00  | 8.18    | Oregon\Swenton (20-01) | 20F24404   | 01  |
| 20F24439     | 17.0 % | Dan Miggins | 20-OSU-01   | 0.00  | 0.00  | 8.18    | Oregon\Swenton (20-01) | 20F24404   | 01  |
| 20F24441     | 17.0 % | Dan Miggins | 20-OSU-01   | 0.00  | 0.00  | 8.18    | Oregon\Swenton (20-01) | 20F24404   | 01  |
| 20F24442     | 17.0 % | Dan Miggins | 20-OSU-01   | 0.00  | 0.00  | 8.18    | Oregon\Swenton (20-01) | 20F24404   | 01  |
| 20F24444     | 17.0 % | Dan Miggins | 20-OSU-01   | 0.00  | 0.00  | 8.18    | Oregon\Swenton (20-01) | 20F24404   | 01  |
| 20F24445     | 17.0 % | Dan Miggins | 20-OSU-01   | 0.00  | 0.00  | 8.18    | Oregon\Swenton (20-01) | 20F24404   | 01  |
| 20F24447     | 17.0 % | Dan Miggins | 20-OSU-01   | 0.00  | 0.00  | 8.18    | Oregon\Swenton (20-01) | 20F24404   | 01  |
| 20F24448     | 17.0 % | Dan Miggins | 20-OSU-01   | 0.00  | 0.00  | 8.18    | Oregon\Swenton (20-01) | 20F24404   | 01  |
| 20F24450     | 17.0 % | Dan Miggins | 20-OSU-01   | 0.00  | 0.00  | 8.18    | Oregon\Swenton (20-01) | 20F24404   | 01  |
| 20F24451     | 17.0 % | Dan Miggins | 20-OSU-01   | 0.00  | 0.00  | 8.18    | Oregon\Swenton (20-01) | 20F24404   | 01  |

| Sample Parameters |        | Sample   | Material | Location      | Standard Name   | Standard (in Ma) | %1σ   | Standard Reference  | Standard 40Ar/39Ar | %1σ   | J          | %1σ   | Air 40Ar/36Ar | %1σ   | MDF (lin) | %1σ   | Volume Ratio | Sensitivity (mol/volt) | Day | Month | Year | Hour | Min | Resist |
|-------------------|--------|----------|----------|---------------|-----------------|------------------|-------|---------------------|--------------------|-------|------------|-------|---------------|-------|-----------|-------|--------------|------------------------|-----|-------|------|------|-----|--------|
| 20F24408          | 17.0 % | MS-13-10 | Sanidine | Rhyolite Dome | FCT-NM (1D8-20) | 28.201           | 0.082 | Kuiper et al (2008) | 9.38932            | 0.072 | 0.00165353 | 0.072 | 298.6         | 0.134 | 0.9999665 | 0.042 | 1            | 3.54E-14               | 7   | SEP   | 2020 | 11   | 49  | 1      |
| 20F24409          | 17.0 % | MS-13-10 | Sanidine | Rhyolite Dome | FCT-NM (1D8-20) | 28.201           | 0.082 | Kuiper et al (2008) | 9.38932            | 0.072 | 0.00165353 | 0.072 | 298.6         | 0.134 | 0.9999665 | 0.042 | 1            | 3.54E-14               | 7   | SEP   | 2020 | 11   | 58  | 1      |
| 20F24411          | 17.0 % | MS-13-10 | Sanidine | Rhyolite Dome | FCT-NM (1D8-20) | 28.201           | 0.082 | Kuiper et al (2008) | 9.38932            | 0.072 | 0.00165353 | 0.072 | 298.6         | 0.134 | 0.9999665 | 0.042 | 1            | 3.54E-14               | 7   | SEP   | 2020 | 12   | 15  | 1      |
| 20F24412          | 17.0 % | MS-13-10 | Sanidine | Rhyolite Dome | FCT-NM (1D8-20) | 28.201           | 0.082 | Kuiper et al (2008) | 9.38932            | 0.072 | 0.00165353 | 0.072 | 298.6         | 0.134 | 0.9999665 | 0.042 | 1            | 3.54E-14               | 7   | SEP   | 2020 | 12   | 24  | 1      |
| 20F24414          | 17.0 % | MS-13-10 | Sanidine | Rhyolite Dome | FCT-NM (1D8-20) | 28.201           | 0.082 | Kuiper et al (2008) | 9.38932            | 0.072 | 0.00165353 | 0.072 | 298.6         | 0.134 | 0.9999665 | 0.042 | 1            | 3.54E-14               | 7   | SEP   | 2020 | 12   | 41  | 1      |
| 20F24415          | 17.0 % | MS-13-10 | Sanidine | Rhyolite Dome | FCT-NM (1D8-20) | 28.201           | 0.082 | Kuiper et al (2008) | 9.38932            | 0.072 | 0.00165353 | 0.072 | 298.6         | 0.134 | 0.9999665 | 0.042 | 1            | 3.54E-14               | 7   | SEP   | 2020 | 12   | 50  | 1      |
| 20F24417          | 17.0 % | MS-13-10 | Sanidine | Rhyolite Dome | FCT-NM (1D8-20) | 28.201           | 0.082 | Kuiper et al (2008) | 9.38932            | 0.072 | 0.00165353 | 0.072 | 298.6         | 0.134 | 0.9999665 | 0.042 | 1            | 3.54E-14               | 7   | SEP   | 2020 | 13   | 7   | 1      |
| 20F24418          | 17.0 % | MS-13-10 | Sanidine | Rhyolite Dome | FCT-NM (1D8-20) | 28.201           | 0.082 | Kuiper et al (2008) | 9.38932            | 0.072 | 0.00165353 | 0.072 | 298.6         | 0.134 | 0.9999665 | 0.042 | 1            | 3.54E-14               | 7   | SEP   | 2020 | 13   | 15  | 1      |
| 20F24420          | 17.0 % | MS-13-10 | Sanidine | Rhyolite Dome | FCT-NM (1D8-20) | 28.201           | 0.082 | Kuiper et al (2008) | 9.38932            | 0.072 | 0.00165353 | 0.072 | 298.6         | 0.134 | 0.9999665 | 0.042 | 1            | 3.54E-14               | 7   | SEP   | 2020 | 13   | 32  | 1      |
| 20F24421          | 17.0 % | MS-13-10 | Sanidine | Rhyolite Dome | FCT-NM (1D8-20) | 28.201           | 0.082 | Kuiper et al (2008) | 9.38932            | 0.072 | 0.00165353 | 0.072 | 298.6         | 0.134 | 0.9999665 | 0.042 | 1            | 3.54E-14               | 7   | SEP   | 2020 | 13   | 41  | 1      |
| 20F24423          | 17.0 % | MS-13-10 | Sanidine | Rhyolite Dome | FCT-NM (1D8-20) | 28.201           | 0.082 | Kuiper et al (2008) | 9.38932            | 0.072 | 0.00165353 | 0.072 | 298.6         | 0.134 | 0.9999665 | 0.042 | 1            | 3.54E-14               | 7   | SEP   | 2020 | 13   | 58  | 1      |
| 20F24424          | 17.0 % | MS-13-10 | Sanidine | Rhyolite Dome | FCT-NM (1D8-20) | 28.201           | 0.082 | Kuiper et al (2008) | 9.38932            | 0.072 | 0.00165353 | 0.072 | 298.6         | 0.134 | 0.9999665 | 0.042 | 1            | 3.54E-14               | 7   | SEP   | 2020 | 14   | 7   | 1      |
| 20F24426          | 17.0 % | MS-13-10 | Sanidine | Rhyolite Dome | FCT-NM (1D8-20) | 28.201           | 0.082 | Kuiper et al (2008) | 9.38932            | 0.072 | 0.00165353 | 0.072 | 298.6         | 0.134 | 0.9999665 | 0.042 | 1            | 3.54E-14               | 7   | SEP   | 2020 | 14   | 24  | 1      |
| 20F24427          | 17.0 % | MS-13-10 | Sanidine | Rhyolite Dome | FCT-NM (1D8-20) | 28.201           | 0.082 | Kuiper et al (2008) | 9.38932            | 0.072 | 0.00165353 | 0.072 | 298.6         | 0.134 | 0.9999665 | 0.042 | 1            | 3.54E-14               | 7   | SEP   | 2020 | 14   | 32  | 1      |
| 20F24429          | 17.0 % | MS-13-10 | Sanidine | Rhyolite Dome | FCT-NM (1D8-20) | 28.201           | 0.082 | Kuiper et al (2008) | 9.38932            | 0.072 | 0.00165353 | 0.072 | 298.6         | 0.134 | 0.9999665 | 0.042 | 1            | 3.54E-14               | 7   | SEP   | 2020 | 14   | 50  | 1      |
| 20F24430          | 17.0 % | MS-13-10 | Sanidine | Rhyolite Dome | FCT-NM (1D8-20) | 28.201           | 0.082 | Kuiper et al (2008) | 9.38932            | 0.072 | 0.00165353 | 0.072 | 298.6         | 0.134 | 0.9999665 | 0.042 | 1            | 3.54E-14               | 7   | SEP   | 2020 | 14   | 58  | 1      |
| 20F24432          | 17.0 % | MS-13-10 | Sanidine | Rhyolite Dome | FCT-NM (1D8-20) | 28.201           | 0.082 | Kuiper et al (2008) | 9.38932            | 0.072 | 0.00165353 | 0.072 | 298.6         | 0.134 | 0.9999665 | 0.042 | 1            | 3.54E-14               | 7   | SEP   | 2020 | 15   | 15  | 1      |
| 20F24433          | 17.0 % | MS-13-10 | Sanidine | Rhyolite Dome | FCT-NM (1D8-20) | 28.201           | 0.082 | Kuiper et al (2008) | 9.38932            | 0.072 | 0.00165353 | 0.072 | 298.6         | 0.134 | 0.9999665 | 0.042 | 1            | 3.54E-14               | 7   | SEP   | 2020 | 15   | 24  | 1      |
| 20F24435          | 17.0 % | MS-13-10 | Sanidine | Rhyolite Dome | FCT-NM (1D8-20) | 28.201           | 0.082 | Kuiper et al (2008) | 9.38932            | 0.072 | 0.00165353 | 0.072 | 298.6         | 0.134 | 0.9999665 | 0.042 | 1            | 3.54E-14               | 7   | SEP   | 2020 | 15   | 41  | 1      |
| 20F24436          | 17.0 % | MS-13-10 | Sanidine | Rhyolite Dome | FCT-NM (1D8-20) | 28.201           | 0.082 | Kuiper et al (2008) | 9.38932            | 0.072 | 0.00165353 | 0.072 | 298.6         | 0.134 | 0.9999665 | 0.042 | 1            | 3.54E-14               | 7   | SEP   | 2020 | 15   | 50  | 1      |
| 20F24438          | 17.0 % | MS-13-10 | Sanidine | Rhyolite Dome | FCT-NM (1D8-20) | 28.201           | 0.082 | Kuiper et al (2008) | 9.38932            | 0.072 | 0.00165353 | 0.072 | 298.6         | 0.134 | 0.9999665 | 0.042 | 1            | 3.54E-14               | 7   | SEP   | 2020 | 16   | 7   | 1      |
| 20F24439          | 17.0 % | MS-13-10 | Sanidine | Rhyolite Dome | FCT-NM (1D8-20) | 28.201           | 0.082 | Kuiper et al (2008) | 9.38932            | 0.072 | 0.00165353 | 0.072 | 298.6         | 0.134 | 0.9999665 | 0.042 | 1            | 3.54E-14               | 7   | SEP   | 2020 | 16   | 15  | 1      |
| 20F24441          | 17.0 % | MS-13-10 | Sanidine | Rhyolite Dome | FCT-NM (1D8-20) | 28.201           | 0.082 | Kuiper et al (2008) | 9.38932            | 0.072 | 0.00165353 | 0.072 | 298.6         | 0.134 | 0.9999665 | 0.042 | 1            | 3.54E-14               | 7   | SEP   | 2020 | 16   | 33  | 1      |
| 20F24442          | 17.0 % | MS-13-10 | Sanidine | Rhyolite Dome | FCT-NM (1D8-20) | 28.201           | 0.082 | Kuiper et al (2008) | 9.38932            | 0.072 | 0.00165353 | 0.072 | 298.6         | 0.134 | 0.9999665 | 0.042 | 1            | 3.54E-14               | 7   | SEP   | 2020 | 16   | 41  | 1      |
| 20F24444          | 17.0 % | MS-13-10 | Sanidine | Rhyolite Dome | FCT-NM (1D8-20) | 28.201           | 0.082 | Kuiper et al (2008) | 9.38932            | 0.072 | 0.00165353 | 0.072 | 298.6         | 0.134 | 0.9999665 | 0.042 | 1            | 3.54E-14               | 7   | SEP   | 2020 | 16   | 58  | 1      |
| 20F24445          | 17.0 % | MS-13-10 | Sanidine | Rhyolite Dome | FCT-NM (1D8-20) | 28.201           | 0.082 | Kuiper et al (2008) | 9.38932            | 0.072 | 0.00165353 | 0.072 | 298.6         | 0.134 | 0.9999665 | 0.042 | 1            | 3.54E-14               | 7   | SEP   | 2020 | 17   | 7   | 1      |
| 20F24447          | 17.0 % | MS-13-10 | Sanidine | Rhyolite Dome | FCT-NM (1D8-20) | 28.201           | 0.082 | Kuiper et al (2008) | 9.38932            | 0.072 | 0.00165353 | 0.072 | 298.6         | 0.134 | 0.9999665 | 0.042 | 1            | 3.54E-14               | 7   | SEP   | 2020 | 17   | 24  | 1      |
| 20F24448          | 17.0 % | MS-13-10 | Sanidine | Rhyolite Dome | FCT-NM (1D8-20) | 28.201           | 0.082 | Kuiper et al (2008) | 9.38932            | 0.072 | 0.00165353 | 0.072 | 298.6         | 0.134 | 0.9999665 | 0.042 | 1            | 3.54E-14               | 7   | SEP   | 2020 | 17   | 33  | 1      |
| 20F24450          | 17.0 % | MS-13-10 | Sanidine | Rhyolite Dome | FCT-NM (1D8-20) | 28.201           | 0.082 | Kuiper et al (2008) | 9.38932            | 0.072 | 0.00165353 | 0.072 | 298.6         | 0.134 | 0.9999665 | 0.042 | 1            | 3.54E-14               | 7   | SEP   | 2020 | 17   | 50  | 1      |
| 20F24451          | 17.0 % | MS-13-10 | Sanidine | Rhyolite Dome | FCT-NM (1D8-20) | 28.201           | 0.082 | Kuiper et al (2008) | 9.38932            | 0.072 | 0.00165353 | 0.072 | 298.6         | 0.134 | 0.9999665 | 0.042 | 1            | 3.54E-14               | 7   | SEP   | 2020 | 17   | 58  | 1      |



20F24404.AGE >>> MS-13-10 >>> OREGON | SWENTON (20-01) PROJECT

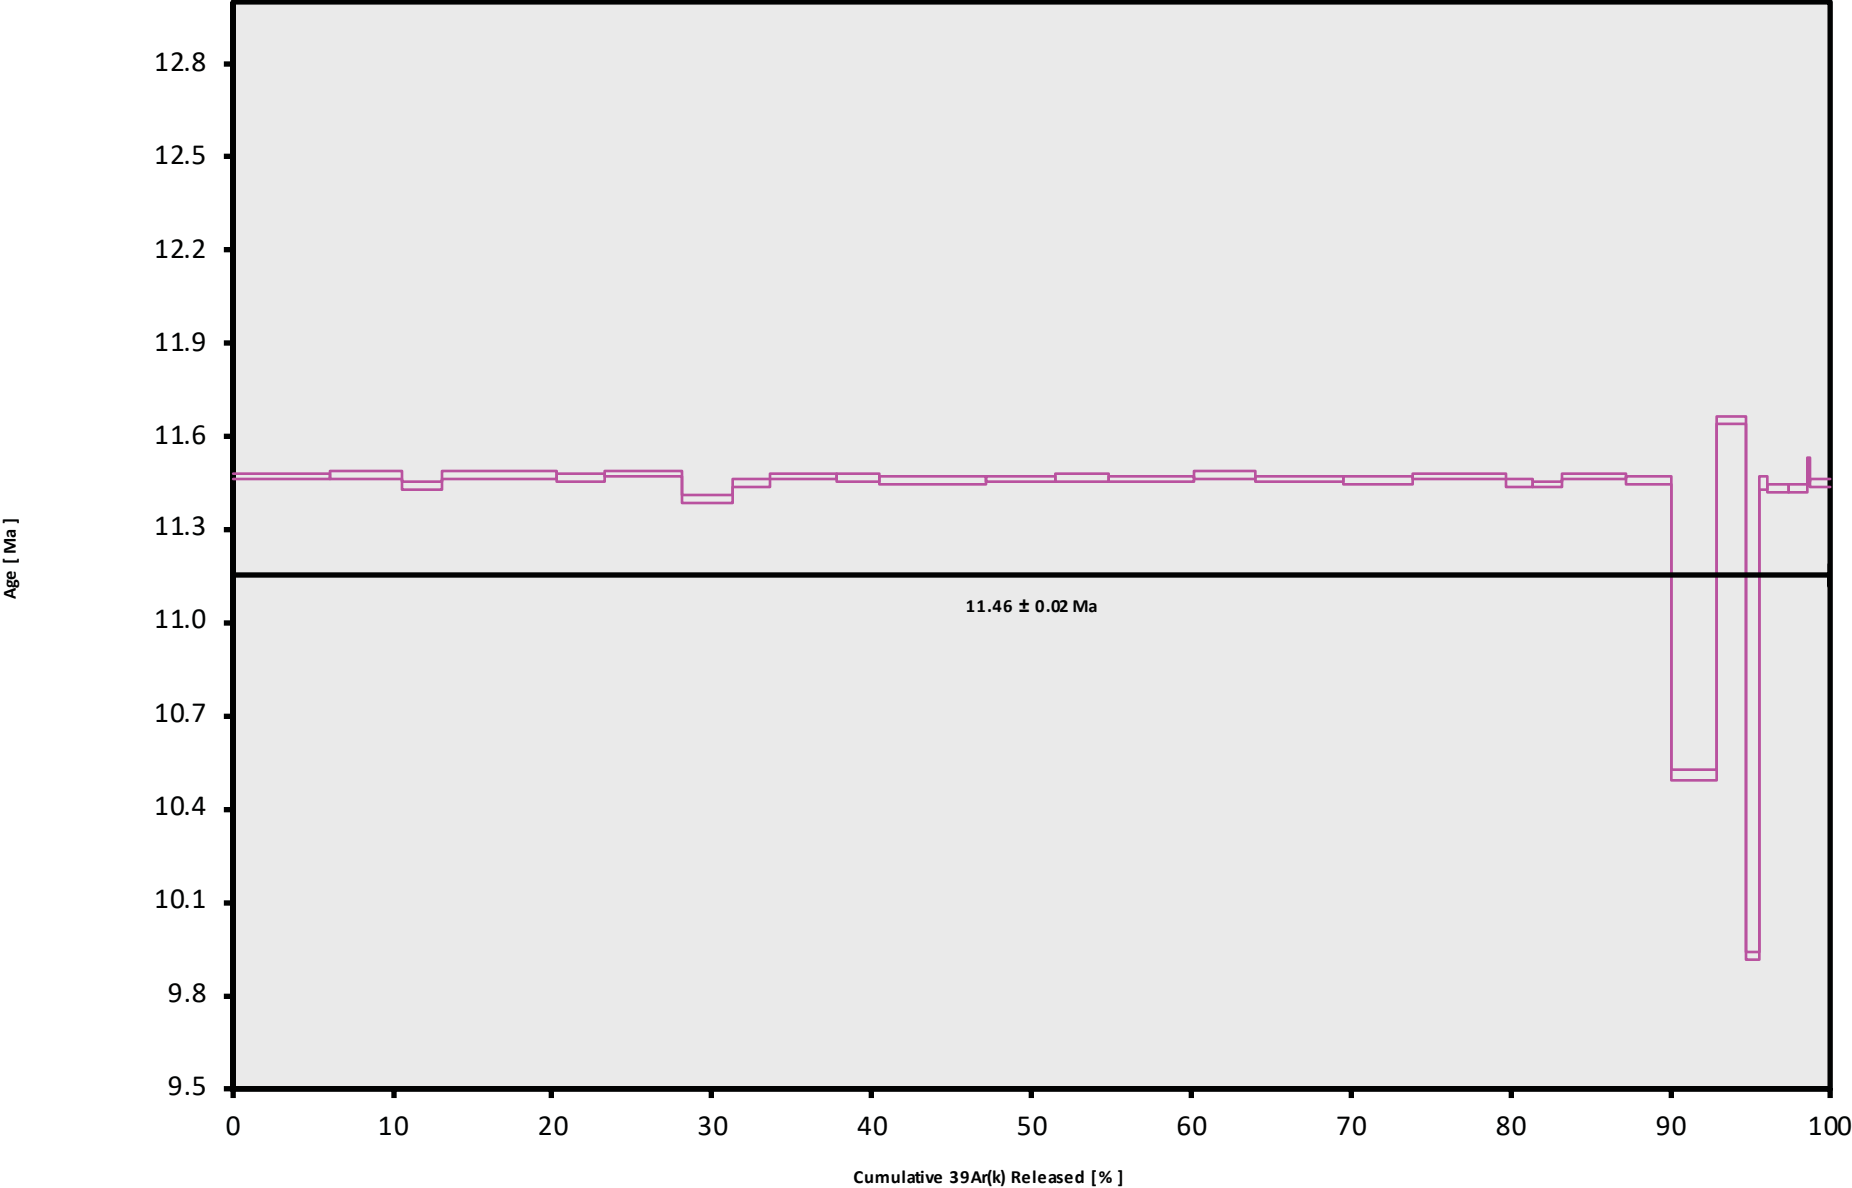

Ar-Ages in Ma

WEIGHTED PLATEAU

11.46  $\pm$  0.02

TOTAL FUSION

11.43  $\pm$  0.02

NORMAL ISOCHRON

11.46  $\pm$  0.02

INVERSE ISOCHRON

11.46  $\pm$  0.02

MSWD (PROBABILITY)

5.46 (0%)

Sample Info

Sanidine

Rhyolite Dome

Dan Miggins

IRR = 20-OSU-01 (1D8-20)



20F24404.AGE >>> MS-13-10 >>> OREGON | SWENTON (20-01) PROJECT

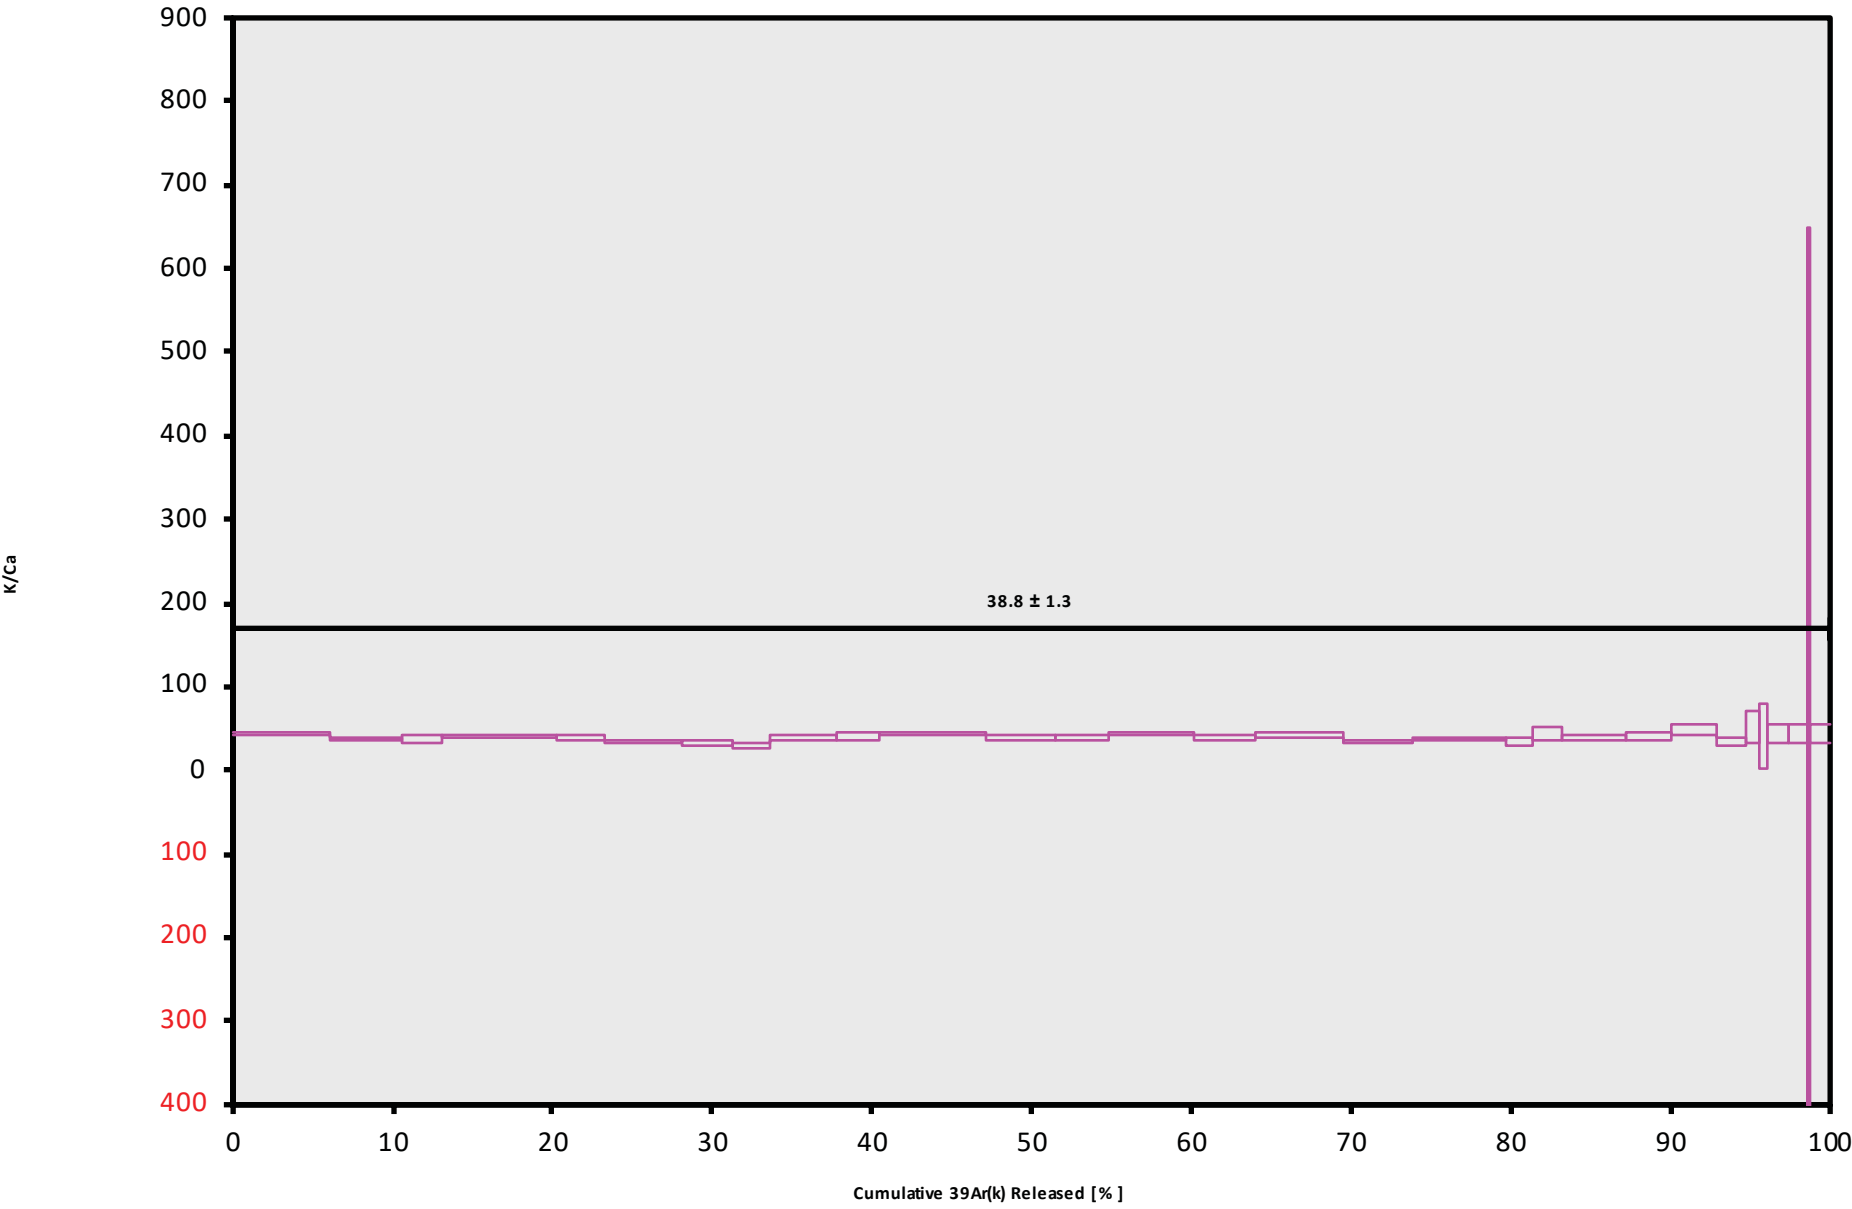

Ar-Ages in Ma

WEIGHTED PLATEAU  
 $11.46 \pm 0.02$   
TOTAL FUSION  
 $11.43 \pm 0.02$   
NORMAL ISOCHRON  
 $11.46 \pm 0.02$   
INVERSE ISOCHRON  
 $11.46 \pm 0.02$

Sample Info

Sanidine  
Rhyolite Dome  
Dan Miggins

IRR = 20-OSU-01 (1D8-20)

20F24404.AGE >>> MS-13-10 >>> OREGON | SWENTON (20-01) PROJECT

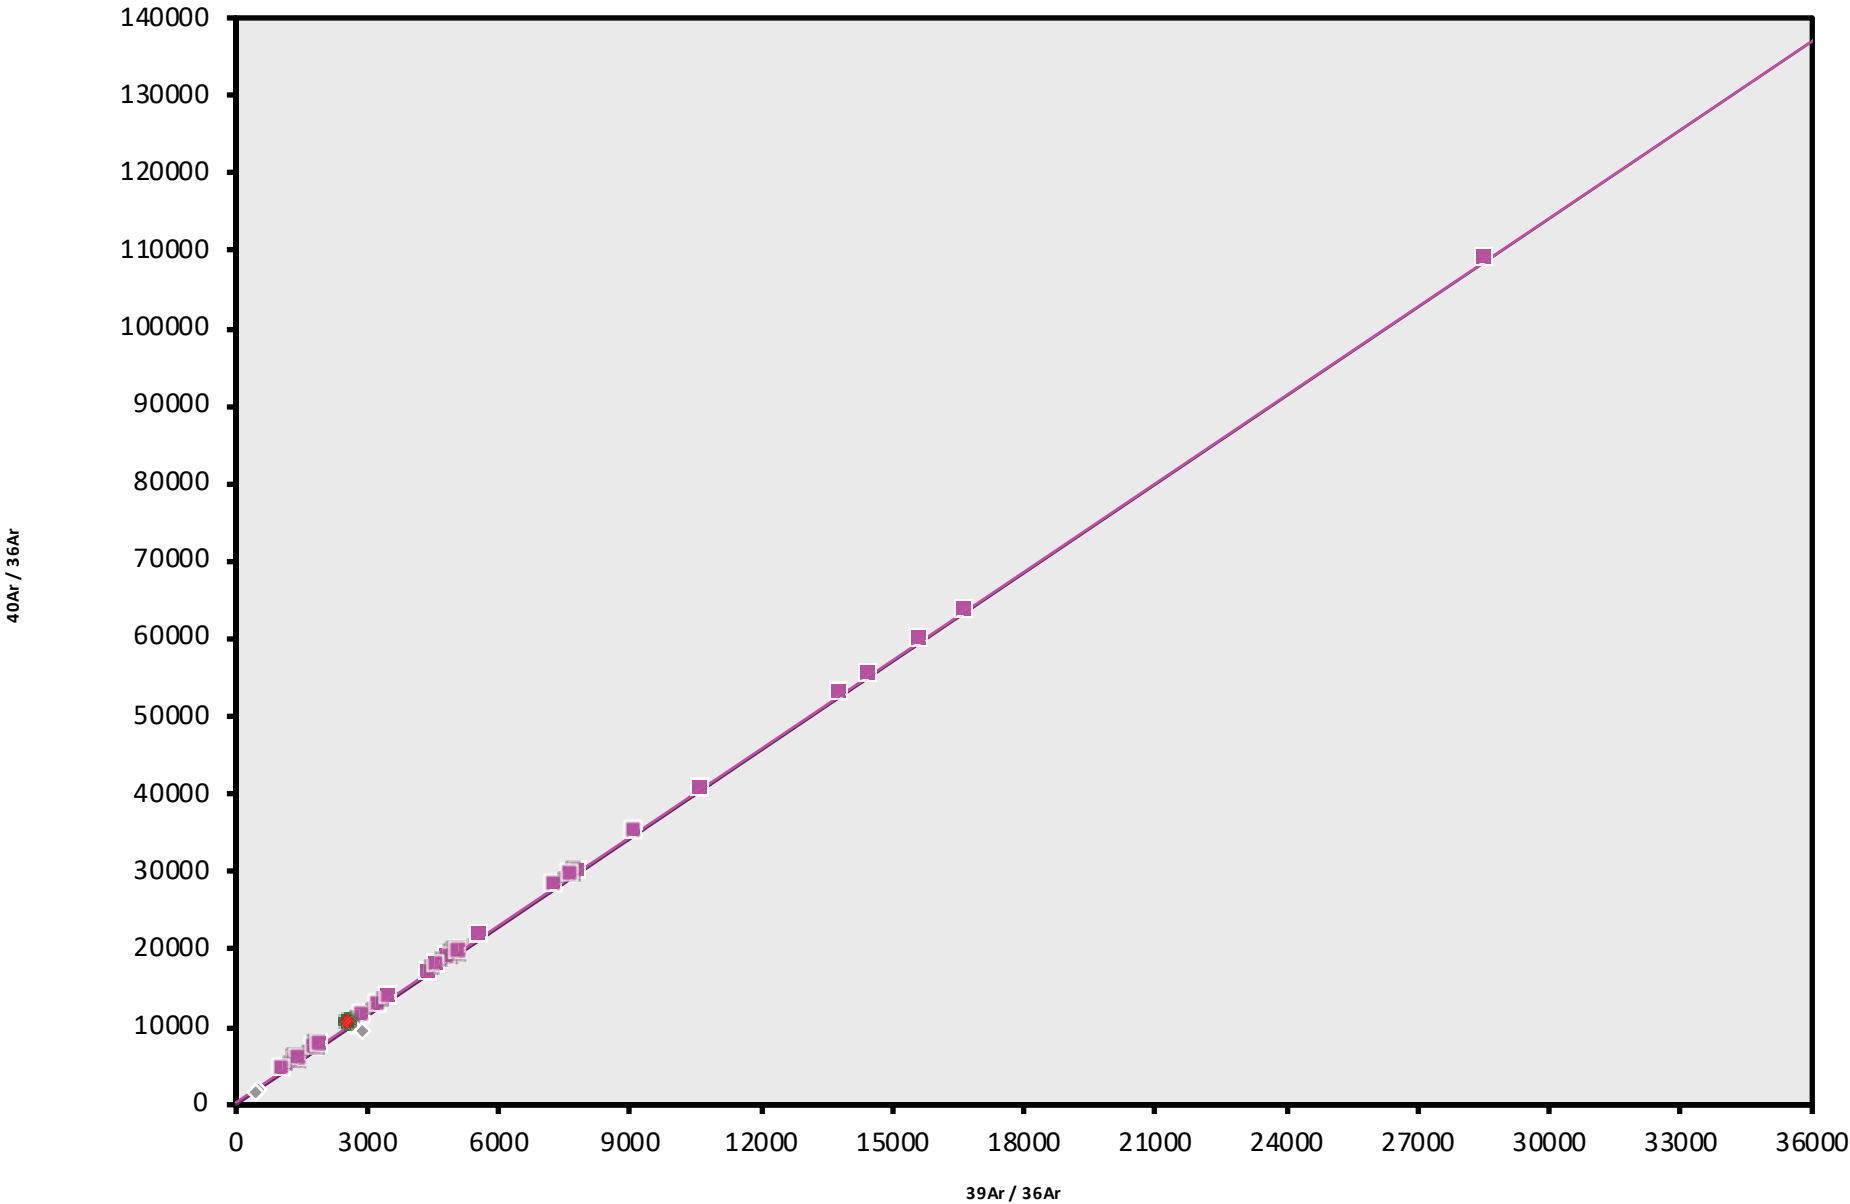

Ar-Ages in Ma

WEIGHTED PLATEAU

11.46 ± 0.02

TOTAL FUSION

11.43 ± 0.02

NORMAL ISOCHRON

11.46 ± 0.02

INVERSE ISOCHRON

11.46 ± 0.02

MSWD (PROBABILITY)

5.81 (0%)

40AR/36AR INTERCEPT

303.2 ± 7.6

Sample Info

Sanidine

Rhyolite Dome

Dan Miggins

IRR = 20-OSU-01 (1D8-20)

20F24404.AGE >>> MS-13-10 >>> OREGON | SWENTON (20-01) PROJECT

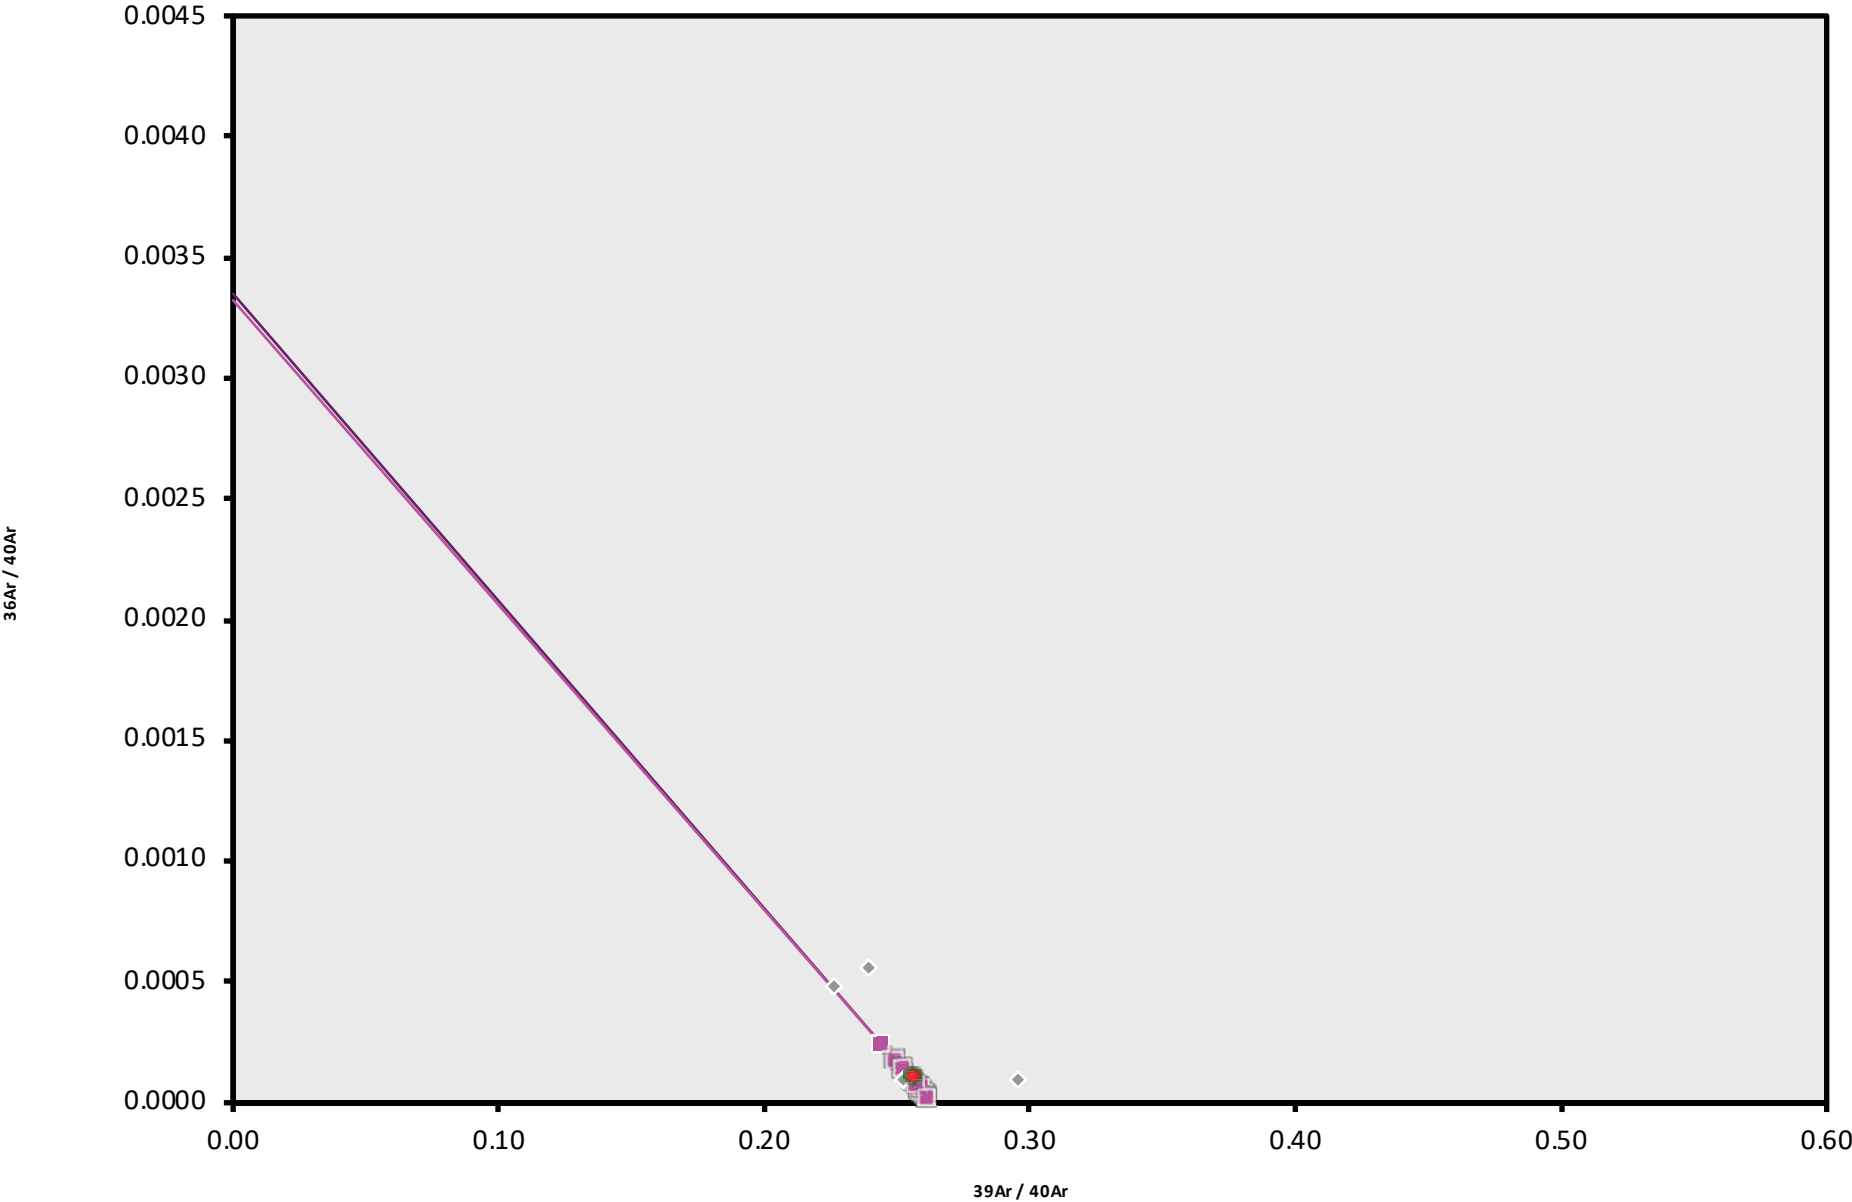

Ar-Ages in Ma

WEIGHTED PLATEAU

$11.46 \pm 0.02$

TOTAL FUSION

$11.43 \pm 0.02$

NORMAL ISOCHRON

$11.46 \pm 0.02$

INVERSE ISOCHRON

$11.46 \pm 0.02$

MSWD (PROBABILITY)

5.60 (0%)

SPREADING FACTOR

7.3%

40AR/36AR INTERCEPT

$301.0 \pm 7.5$

Sample Info

Sanidine

Rhyolite Dome

Dan Miggins

IRR = 20-OSU-01 (1D8-20)

| Relative Abundances |        |   | 36Ar<br>[fA] | %1σ   | 37Ar<br>[fA] | %1σ   | 38Ar<br>[fA] | %1σ    | 39Ar<br>[fA] | %1σ   | 40Ar<br>[fA] | %1σ   | 40(r)/39(k) ± 2σ  | Age ± 2σ<br>(Ma) | 40Ar(r)<br>(%) | 39Ar(k)<br>(%) | K/Ca ± 2σ       |
|---------------------|--------|---|--------------|-------|--------------|-------|--------------|--------|--------------|-------|--------------|-------|-------------------|------------------|----------------|----------------|-----------------|
| 21F15924            | 24.0 % | ✓ | 0.0453675    | 0.969 | 59.5844      | 0.251 | 0.0946450    | 9.966  | 7.45147      | 0.137 | 44.5600      | 0.056 | 4.83180 ± 0.03874 | 14.57 ± 0.12     | 80.38          | 3.69           | 0.0535 ± 0.0003 |
| 21F15925            | 24.0 % | ✓ | 0.0535597    | 0.917 | 113.8582     | 0.244 | 0.1881582    | 4.973  | 15.64200     | 0.078 | 82.8732      | 0.032 | 4.88549 ± 0.02094 | 14.74 ± 0.06     | 91.78          | 7.75           | 0.0588 ± 0.0003 |
| 21F15927            | 24.0 % | ✓ | 0.0435287    | 1.040 | 126.0955     | 0.242 | 0.1377196    | 7.205  | 10.74281     | 0.101 | 53.7186      | 0.046 | 4.77332 ± 0.02815 | 14.40 ± 0.08     | 94.74          | 5.31           | 0.0364 ± 0.0002 |
| 21F15928            | 24.0 % | ✓ | 0.0406770    | 1.009 | 83.7162      | 0.245 | 0.0991116    | 9.521  | 8.10179      | 0.123 | 46.1390      | 0.053 | 5.06281 ± 0.03391 | 15.27 ± 0.10     | 88.31          | 4.01           | 0.0413 ± 0.0002 |
| 21F15930            | 24.0 % | ✓ | 0.0339200    | 1.200 | 70.2456      | 0.248 | 0.1201595    | 7.530  | 8.14760      | 0.124 | 43.4957      | 0.055 | 4.81739 ± 0.03313 | 14.53 ± 0.10     | 89.74          | 4.04           | 0.0496 ± 0.0003 |
| 21F15931            | 24.0 % | ✓ | 0.0382056    | 1.113 | 112.1420     | 0.243 | 0.1377155    | 6.758  | 10.66079     | 0.102 | 54.4188      | 0.048 | 4.91613 ± 0.02696 | 14.83 ± 0.08     | 95.66          | 5.27           | 0.0406 ± 0.0002 |
| 21F15933            | 24.0 % | ✓ | 0.0519260    | 0.882 | 77.5088      | 0.247 | 0.1150980    | 7.713  | 9.25761      | 0.116 | 53.6405      | 0.046 | 4.82057 ± 0.03254 | 14.54 ± 0.10     | 82.75          | 4.59           | 0.0511 ± 0.0003 |
| 21F15934            | 24.0 % | ✓ | 0.0317227    | 1.317 | 66.2852      | 0.248 | 0.1093117    | 8.737  | 9.54732      | 0.110 | 50.1202      | 0.048 | 4.83891 ± 0.02898 | 14.60 ± 0.09     | 91.76          | 4.73           | 0.0617 ± 0.0003 |
| 21F15936            | 24.0 % | ✓ | 0.0051531    | 6.467 | 16.8837      | 0.334 | 0.0100159    | 96.677 | 1.51789      | 0.614 | 7.6351       | 0.286 | 4.94893 ± 0.14856 | 14.93 ± 0.45     | 97.68          | 0.75           | 0.0384 ± 0.0005 |
| 21F15937            | 24.0 % | ✓ | 0.0213071    | 1.841 | 55.2157      | 0.251 | 0.0477903    | 20.033 | 4.74342      | 0.196 | 25.2027      | 0.092 | 4.94789 ± 0.05464 | 14.92 ± 0.16     | 92.43          | 2.35           | 0.0367 ± 0.0002 |
| 21F15939            | 24.0 % | ✓ | 0.0119592    | 3.076 | 31.9150      | 0.271 | 0.0682675    | 13.356 | 5.00191      | 0.187 | 25.2763      | 0.103 | 4.87379 ± 0.04900 | 14.70 ± 0.15     | 96.05          | 2.48           | 0.0671 ± 0.0004 |
| 21F15940            | 24.0 % | ✓ | 0.0065255    | 5.659 | 21.5848      | 0.302 | 0.0249662    | 38.070 | 2.41241      | 0.393 | 11.8130      | 0.206 | 4.83842 ± 0.10176 | 14.59 ± 0.31     | 98.24          | 1.19           | 0.0478 ± 0.0005 |
| 21F15942            | 24.0 % | ✓ | 0.0202744    | 2.022 | 64.5586      | 0.250 | 0.0674007    | 14.375 | 6.08655      | 0.159 | 30.4157      | 0.116 | 4.89139 ± 0.04525 | 14.75 ± 0.14     | 97.22          | 3.01           | 0.0403 ± 0.0002 |
| 21F15943            | 24.0 % | ✓ | 0.0070801    | 5.070 | 16.6231      | 0.338 | 0.0126382    | 71.708 | 1.58268      | 0.585 | 8.6263       | 0.414 | 4.99557 ± 0.15543 | 15.07 ± 0.47     | 91.04          | 0.78           | 0.0407 ± 0.0006 |
| 21F15945            | 24.0 % | ✓ | 0.0370706    | 1.268 | 78.0351      | 0.247 | 0.0878555    | 11.373 | 6.56849      | 0.139 | 36.9655      | 0.061 | 4.93856 ± 0.04616 | 14.89 ± 0.14     | 87.08          | 3.25           | 0.0359 ± 0.0002 |
| 21F15946            | 24.0 % | ✓ | 0.0557289    | 0.870 | 101.0908     | 0.245 | 0.1227465    | 8.298  | 10.44370     | 0.096 | 60.5266      | 0.038 | 5.01409 ± 0.03029 | 15.12 ± 0.09     | 85.98          | 5.17           | 0.0441 ± 0.0002 |
| 21F15948            | 24.0 % | ✓ | 0.0541664    | 0.906 | 113.4476     | 0.244 | 0.1463332    | 6.227  | 11.19461     | 0.094 | 62.0386      | 0.040 | 4.94665 ± 0.02877 | 14.92 ± 0.09     | 88.68          | 5.54           | 0.0422 ± 0.0002 |
| 21F15949            | 24.0 % | ✓ | 0.0276444    | 1.371 | 81.2885      | 0.246 | 0.0866376    | 10.821 | 6.38400      | 0.158 | 32.8934      | 0.070 | 4.92691 ± 0.04021 | 14.86 ± 0.12     | 94.84          | 3.15           | 0.0335 ± 0.0002 |
| 21F15951            | 24.0 % | ✓ | 0.0469337    | 1.078 | 110.9462     | 0.244 | 0.1514153    | 6.264  | 11.51941     | 0.097 | 61.4993      | 0.038 | 4.92947 ± 0.02876 | 14.87 ± 0.09     | 91.76          | 5.70           | 0.0444 ± 0.0002 |
| 21F15952            | 24.0 % | ✓ | 0.0342574    | 1.343 | 81.5799      | 0.246 | 0.1134667    | 7.727  | 8.41382      | 0.120 | 44.5404      | 0.052 | 4.89044 ± 0.03568 | 14.75 ± 0.11     | 91.81          | 4.16           | 0.0441 ± 0.0002 |
| 21F15954            | 24.0 % | ✓ | 0.0259130    | 1.498 | 57.6128      | 0.251 | 0.0616352    | 15.486 | 5.07735      | 0.183 | 28.4634      | 0.078 | 5.03401 ± 0.05068 | 15.18 ± 0.15     | 89.14          | 2.51           | 0.0376 ± 0.0002 |
| 21F15955            | 24.0 % | ✓ | 0.0086825    | 3.879 | 17.5078      | 0.320 | 0.0225699    | 41.618 | 1.40007      | 0.641 | 8.1057       | 0.264 | 4.98663 ± 0.16164 | 15.04 ± 0.49     | 85.44          | 0.69           | 0.0341 ± 0.0005 |
| 21F15957            | 24.0 % | ✓ | 0.0086226    | 4.168 | 11.6938      | 0.416 | 0.0338846    | 27.462 | 1.95656      | 0.461 | 10.7619      | 0.224 | 4.68453 ± 0.12101 | 14.13 ± 0.36     | 84.84          | 0.97           | 0.0717 ± 0.0009 |
| 21F15958            | 24.0 % | ✓ | 0.0260448    | 1.685 | 54.1054      | 0.252 | 0.0558113    | 17.120 | 4.34389      | 0.207 | 24.8183      | 0.093 | 4.96761 ± 0.06549 | 14.98 ± 0.20     | 86.25          | 2.15           | 0.0342 ± 0.0002 |
| 21F15960            | 24.0 % | ✓ | 0.0222891    | 1.715 | 35.7581      | 0.266 | 0.0462530    | 20.290 | 3.49695      | 0.249 | 20.2111      | 0.116 | 4.73235 ± 0.07138 | 14.28 ± 0.21     | 81.34          | 1.73           | 0.0418 ± 0.0003 |
| 21F15961            | 24.0 % | ✓ | 0.0299813    | 1.266 | 69.6738      | 0.249 | 0.1054610    | 9.102  | 7.83398      | 0.125 | 40.2587      | 0.058 | 4.74060 ± 0.03232 | 14.30 ± 0.10     | 91.72          | 3.88           | 0.0481 ± 0.0003 |
| 21F15963            | 24.0 % | ✓ | 0.0209928    | 2.089 | 48.1821      | 0.254 | 0.0514894    | 16.745 | 5.55688      | 0.173 | 29.5090      | 0.081 | 4.90893 ± 0.05131 | 14.81 ± 0.15     | 91.93          | 2.75           | 0.0493 ± 0.0003 |
| 21F15964            | 24.0 % | ✓ | 0.0511929    | 0.907 | 72.9314      | 0.247 | 0.0845556    | 10.523 | 7.31610      | 0.134 | 44.2692      | 0.055 | 4.79641 ± 0.04122 | 14.47 ± 0.12     | 78.76          | 3.62           | 0.0429 ± 0.0002 |
| 21F15966            | 24.0 % | ✓ | 0.0235315    | 1.749 | 44.8720      | 0.258 | 0.0638839    | 14.269 | 4.27835      | 0.216 | 24.5672      | 0.094 | 4.97947 ± 0.06298 | 15.02 ± 0.19     | 86.13          | 2.12           | 0.0407 ± 0.0003 |
| 21F15967            | 24.0 % | ✓ | 0.0192198    | 1.981 | 51.5632      | 0.256 | 0.0781574    | 11.852 | 5.33272      | 0.174 | 27.0758      | 0.092 | 4.81088 ± 0.04728 | 14.51 ± 0.14     | 94.16          | 2.64           | 0.0442 ± 0.0003 |
| Σ                   |        |   | 0.9034783    | 0.254 | 1946.5055    | 0.050 | 2.5451540    | 2.018  | 202.01316    | 0.027 | 1094.4391    | 0.012 |                   |                  |                |                |                 |

| Information on Analysis and Constants Used in Calculations |  |
|------------------------------------------------------------|--|
| Project = <b>SWENTON (20-01)</b>                           |  |
| Sample = <b>MS-17-DAM</b>                                  |  |
| Material = <b>Plagioclase</b>                              |  |
| Location = <b>Unknown</b>                                  |  |
| Region = <b>Eastern Oregon</b>                             |  |
| Analyst = <b>Dan Miggins</b>                               |  |
| Irradiation = <b>21-OSU-04 (4X6-21)</b>                    |  |
| Position = <b>X: 0   Y: 0   Z/H: 5.216076 mm</b>           |  |
| FCT-NM Age = <b>28.201 ± 0.023 Ma</b>                      |  |
| FCT-NM Reference = <b>Kuiper et al (2008)</b>              |  |
| FCT-NM 40Ar/39Ar Ratio = <b>9.38444 ± 0.01060</b>          |  |
| FCT-NM J-value = <b>0.00165439 ± 0.00000187</b>            |  |
| Air Shot 40Ar/36Ar = <b>301.0220 ± 0.3823</b>              |  |
| Air Shot MDF = <b>0.99795266 ± 0.00040754 (LIN)</b>        |  |
| Experiment Type = <b>Total Fusion</b>                      |  |
| Extraction Method = <b>Single Crystal Laser Heating</b>    |  |
| Heating = <b>62 sec</b>                                    |  |
| Isolation = <b>1.50 min</b>                                |  |
| Instrument = <b>ARGUS-VI-F</b>                             |  |
| Preferred Age = <b>Ideogram Age</b>                        |  |
| Age Classification = <b>Eruption Age</b>                   |  |
| IGSN = <b>Undefined</b>                                    |  |
| Rock Class = <b>Undefined</b>                              |  |
| Lithology = <b>Undefined</b>                               |  |
| Lat-Lon = <b>Undefined - Undefined</b>                     |  |

Age Equations = **Min et al. (2000)**  
Negative Intensities = **Allowed**  
Collector Calibrations = **36Ar**  
Decay 40K = **5.463 ± 0.107 E-10 1/a**  
Decay 39Ar = **2.940 ± 0.016 E-07 1/h**  
Decay 37Ar = **8.230 ± 0.012 E-04 1/h**  
Decay 36Cl = **2.257 ± 0.015 E-06 1/a**  
Decay 40K(EC,β<sup>+</sup>) = **0.580 ± 0.014 E-10 1/a**  
Decay 40K(β<sup>-</sup>) = **4.884 ± 0.099 E-10 1/a**  
Atmospheric 40/36(a) = **298.56 ± 0.31**  
Atmospheric 38/36(a) = **0.1885 ± 0.0003**  
Production 39/37(ca) = **0.0006425 ± 0.0000059**  
Production 38/37(ca) = **0.0001800 ± 0.0000173**  
Production 36/37(ca) = **0.0002703 ± 0.0000005**  
Production 40/39(k) = **0.000607 ± 0.000059**  
Production 38/39(k) = **0.012077 ± 0.000011**  
Production 36/38(cl) = **262.80 ± 1.71**  
Scaling Ratio K/Ca = **0.430**  
Abundance Ratio 40K/K = **1.1700 ± 0.0100 E-04**  
Atomic Weight K = **39.0983 ± 0.0001 g**

| Results          | 40(a)/36(a) ± 2σ           | 40(r)/39(k) ± 2σ             | Age ± 2σ<br>(Ma)        | MSWD         | 39Ar(k)<br>(%,n)     | K/Ca ± 2σ       |
|------------------|----------------------------|------------------------------|-------------------------|--------------|----------------------|-----------------|
| Age Plateau      |                            |                              |                         |              |                      |                 |
| Error Mean       |                            | 4.88693 ± 0.03055<br>± 0.63% | 14.74 ± 0.10<br>± 0.66% | 18.53<br>0%  | 100.00<br>30         | 0.0451 ± 0.0035 |
|                  |                            | Full External Error ± 0.77   |                         | 1.53         | 2σ Confidence Limit  |                 |
|                  |                            | Analytical Error ± 0.09      |                         | 4.3049       | Error Magnification  |                 |
| Total Fusion Age |                            | 4.88966 ± 0.00752<br>± 0.15% | 14.75 ± 0.04<br>± 0.27% |              | 30                   | 0.0444 ± 0.0001 |
|                  |                            | Full External Error ± 0.77   |                         |              |                      |                 |
|                  |                            | Analytical Error ± 0.02      |                         |              |                      |                 |
| Normal Isochron  |                            |                              |                         |              |                      |                 |
| No Convergence   | 304.17 ± 32.51<br>± 10.69% | 4.85425 ± 0.06624<br>± 1.36% | 14.64 ± 0.20<br>± 1.38% | 18.87<br>0%  | 100.00<br>30         |                 |
|                  |                            | Full External Error ± 0.79   |                         | 1.53         | 2σ Confidence Limit  |                 |
|                  |                            | Analytical Error ± 0.20      |                         | 4.3441       | Error Magnification  |                 |
|                  |                            |                              |                         | 100          | Number of Iterations |                 |
|                  |                            |                              |                         | 0.0001672386 | Convergence          |                 |
| Inverse Isochron |                            |                              |                         |              |                      |                 |
| Error Chron      | 322.73 ± 34.88<br>± 10.81% | 4.84375 ± 0.06858<br>± 1.42% | 14.61 ± 0.21<br>± 1.43% | 17.85<br>0%  | 100.00<br>30         |                 |
|                  |                            | Full External Error ± 0.79   |                         | 1.53         | 2σ Confidence Limit  |                 |
|                  |                            | Analytical Error ± 0.21      |                         | 4.2252       | Error Magnification  |                 |
|                  |                            |                              |                         | 4            | Number of Iterations |                 |
|                  |                            |                              |                         | 0.0000060106 | Convergence          |                 |
|                  |                            |                              |                         | 19%          | Spreading Factor     |                 |

| Incremental Heating |        |   | 36Ar(a)<br>[fA] | 37Ar(ca)<br>[fA] | 38Ar(cl)<br>[fA] | 39Ar(k)<br>[fA] | 40Ar(r)<br>[fA] | Age ± 2σ<br>(Ma) | 40Ar(r)<br>(%) | 39Ar(k)<br>(%) | K/Ca ± 2σ       |
|---------------------|--------|---|-----------------|------------------|------------------|-----------------|-----------------|------------------|----------------|----------------|-----------------|
| 21F15924            | 24.0 % | ✓ | 0.0292619       | 59.5844          | 0.0000000        | 7.41319         | 35.81909        | 14.57 ± 0.12     | 80.38          | 3.69           | 0.0535 ± 0.0003 |
| 21F15925            | 24.0 % | ✓ | 0.0227838       | 113.8582         | 0.0000000        | 15.56885        | 76.06138        | 14.74 ± 0.06     | 91.78          | 7.75           | 0.0588 ± 0.0003 |
| 21F15927            | 24.0 % | ✓ | 0.0094451       | 126.0955         | 0.0000000        | 10.66180        | 50.89220        | 14.40 ± 0.08     | 94.74          | 5.31           | 0.0364 ± 0.0002 |
| 21F15928            | 24.0 % | ✓ | 0.0180485       | 83.7162          | 0.0000000        | 8.04800         | 40.74551        | 15.27 ± 0.10     | 88.31          | 4.01           | 0.0413 ± 0.0002 |
| 21F15930            | 24.0 % | ✓ | 0.0149318       | 70.2456          | 0.0068471        | 8.10247         | 39.03274        | 14.53 ± 0.10     | 89.74          | 4.04           | 0.0496 ± 0.0003 |
| 21F15931            | 24.0 % | ✓ | 0.0078936       | 112.1420         | 0.0000000        | 10.58874        | 52.05563        | 14.83 ± 0.08     | 95.66          | 5.27           | 0.0406 ± 0.0002 |
| 21F15933            | 24.0 % | ✓ | 0.0309754       | 77.5088          | 0.0000000        | 9.20781         | 44.38686        | 14.54 ± 0.10     | 82.75          | 4.59           | 0.0511 ± 0.0003 |
| 21F15934            | 24.0 % | ✓ | 0.0138058       | 66.2852          | 0.0000000        | 9.50473         | 45.99256        | 14.60 ± 0.09     | 91.76          | 4.73           | 0.0617 ± 0.0003 |
| 21F15936            | 24.0 % | ✓ | 0.0005895       | 16.8837          | 0.0000000        | 1.50704         | 7.45823         | 14.93 ± 0.45     | 97.68          | 0.75           | 0.0384 ± 0.0005 |
| 21F15937            | 24.0 % | ✓ | 0.0063823       | 55.2157          | 0.0000000        | 4.70794         | 23.29438        | 14.92 ± 0.16     | 92.43          | 2.35           | 0.0367 ± 0.0002 |
| 21F15939            | 24.0 % | ✓ | 0.0033324       | 31.9150          | 0.0017343        | 4.98141         | 24.27833        | 14.70 ± 0.15     | 96.05          | 2.48           | 0.0671 ± 0.0004 |
| 21F15940            | 24.0 % | ✓ | 0.0006911       | 21.5848          | 0.0000000        | 2.39855         | 11.60518        | 14.59 ± 0.31     | 98.24          | 1.19           | 0.0478 ± 0.0005 |
| 21F15942            | 24.0 % | ✓ | 0.0028243       | 64.5586          | 0.0000000        | 6.04507         | 29.56880        | 14.75 ± 0.14     | 97.22          | 3.01           | 0.0403 ± 0.0002 |
| 21F15943            | 24.0 % | ✓ | 0.0025869       | 16.6231          | 0.0000000        | 1.57200         | 7.85302         | 15.07 ± 0.47     | 91.04          | 0.78           | 0.0407 ± 0.0006 |
| 21F15945            | 24.0 % | ✓ | 0.0159777       | 78.0351          | 0.0000000        | 6.51835         | 32.19124        | 14.89 ± 0.14     | 87.08          | 3.25           | 0.0359 ± 0.0002 |
| 21F15946            | 24.0 % | ✓ | 0.0284040       | 101.0908         | 0.0000000        | 10.37875        | 52.04002        | 15.12 ± 0.09     | 85.98          | 5.17           | 0.0441 ± 0.0002 |
| 21F15948            | 24.0 % | ✓ | 0.0235015       | 113.4476         | 0.0000000        | 11.12172        | 55.01524        | 14.92 ± 0.09     | 88.68          | 5.54           | 0.0422 ± 0.0002 |
| 21F15949            | 24.0 % | ✓ | 0.0056721       | 81.2885          | 0.0000000        | 6.33178         | 31.19608        | 14.86 ± 0.12     | 94.84          | 3.15           | 0.0335 ± 0.0002 |
| 21F15951            | 24.0 % | ✓ | 0.0169449       | 110.9462         | 0.0000000        | 11.44813        | 56.43328        | 14.87 ± 0.09     | 91.76          | 5.70           | 0.0444 ± 0.0002 |
| 21F15952            | 24.0 % | ✓ | 0.0122064       | 81.5799          | 0.0000000        | 8.36140         | 40.89097        | 14.75 ± 0.11     | 91.81          | 4.16           | 0.0441 ± 0.0002 |
| 21F15954            | 24.0 % | ✓ | 0.0103403       | 57.6128          | 0.0000000        | 5.04033         | 25.37312        | 15.18 ± 0.15     | 89.14          | 2.51           | 0.0376 ± 0.0002 |
| 21F15955            | 24.0 % | ✓ | 0.0039499       | 17.5078          | 0.0019011        | 1.38883         | 6.92556         | 15.04 ± 0.49     | 85.44          | 0.69           | 0.0341 ± 0.0005 |
| 21F15957            | 24.0 % | ✓ | 0.0054609       | 11.6938          | 0.0072117        | 1.94905         | 9.13036         | 14.13 ± 0.36     | 84.84          | 0.97           | 0.0717 ± 0.0009 |
| 21F15958            | 24.0 % | ✓ | 0.0114201       | 54.1054          | 0.0000000        | 4.30913         | 21.40607        | 14.98 ± 0.20     | 86.25          | 2.15           | 0.0342 ± 0.0002 |
| 21F15960            | 24.0 % | ✓ | 0.0126236       | 35.7581          | 0.0000000        | 3.47397         | 16.44006        | 14.28 ± 0.21     | 81.34          | 1.73           | 0.0418 ± 0.0003 |
| 21F15961            | 24.0 % | ✓ | 0.0111484       | 69.6738          | 0.0000000        | 7.78922         | 36.92552        | 14.30 ± 0.10     | 91.72          | 3.88           | 0.0481 ± 0.0003 |
| 21F15963            | 24.0 % | ✓ | 0.0079692       | 48.1821          | 0.0000000        | 5.52592         | 27.12636        | 14.81 ± 0.15     | 91.93          | 2.75           | 0.0493 ± 0.0003 |
| 21F15964            | 24.0 % | ✓ | 0.0314796       | 72.9314          | 0.0000000        | 7.26925         | 34.86629        | 14.47 ± 0.12     | 78.76          | 3.62           | 0.0429 ± 0.0002 |
| 21F15966            | 24.0 % | ✓ | 0.0114023       | 44.8720          | 0.0023362        | 4.24952         | 21.16033        | 15.02 ± 0.19     | 86.13          | 2.12           | 0.0407 ± 0.0003 |
| 21F15967            | 24.0 % | ✓ | 0.0052818       | 51.5632          | 0.0038773        | 5.29959         | 25.49567        | 14.51 ± 0.14     | 94.16          | 2.64           | 0.0442 ± 0.0003 |
| Σ                   |        |   | 0.3773350       | 1946.5055        | 0.0239076        | 200.76253       | 981.66012       |                  |                |                |                 |

| Information on Analysis                                                                                                                                                                                                                                                                                             | Results                 | 40(r)/39(k) ± 2σ             | Age ± 2σ (Ma)                         | MSWD   | 39Ar(k) (% <i>n</i> ) | K/Ca ± 2σ       |
|---------------------------------------------------------------------------------------------------------------------------------------------------------------------------------------------------------------------------------------------------------------------------------------------------------------------|-------------------------|------------------------------|---------------------------------------|--------|-----------------------|-----------------|
| Project = <b>SWENTON (20-01)</b><br>Sample = <b>MS-17-DAM</b><br>Material = <b>Plagioclase</b><br>Location = <b>Unknown</b><br>Region = <b>Eastern Oregon</b><br>Analyst = <b>Dan Miggins</b><br>Irradiation = <b>21-OSU-04 (4X6-21)</b><br>J = <b>0.00165439 ± 0.00000187</b><br>FCT-NM = <b>28.201 ± 0.023 Ma</b> | <b>Age Plateau</b>      | 4.88693 ± 0.03055            | <b>14.74 ± 0.10</b>                   | 18.53  | 100.00                | 0.0451 ± 0.0035 |
|                                                                                                                                                                                                                                                                                                                     | <b>Error Mean</b>       | ± 0.63%                      | ± <b>0.66%</b>                        | 0%     | 30                    |                 |
|                                                                                                                                                                                                                                                                                                                     |                         |                              | Full External Error ± 0.77            | 1.53   | 2σ Confidence Limit   |                 |
|                                                                                                                                                                                                                                                                                                                     |                         |                              | Analytical Error ± 0.09               | 4.3049 | Error Magnification   |                 |
|                                                                                                                                                                                                                                                                                                                     | <b>Total Fusion Age</b> | 4.88966 ± 0.00752<br>± 0.15% | <b>14.75 ± 0.04</b><br>± <b>0.27%</b> |        | 30                    | 0.0444 ± 0.0001 |
|                                                                                                                                                                                                                                                                                                                     |                         |                              | Full External Error ± 0.77            |        |                       |                 |
|                                                                                                                                                                                                                                                                                                                     |                         |                              | Analytical Error ± 0.02               |        |                       |                 |

| Normal Isochron |        |   | 39(k)/36(a) ± 2σ  | 40(a+r)/36(a) ± 2σ  | r.i.   |
|-----------------|--------|---|-------------------|---------------------|--------|
| 21F15924        | 24.0 % | ✓ | 253.34 ± 7.69     | 1522.65 ± 46.08     | 0.9952 |
| 21F15925        | 24.0 % | ✓ | 683.33 ± 29.98    | 3636.96 ± 159.47    | 0.9992 |
| 21F15927        | 24.0 % | ✓ | 1128.81 ± 110.93  | 5686.76 ± 558.77    | 0.9997 |
| 21F15928        | 24.0 % | ✓ | 445.91 ± 20.58    | 2556.11 ± 117.83    | 0.9983 |
| 21F15930        | 24.0 % | ✓ | 542.63 ± 29.90    | 2912.62 ± 160.34    | 0.9988 |
| 21F15931        | 24.0 % | ✓ | 1341.44 ± 147.70  | 6893.24 ± 758.87    | 0.9998 |
| 21F15933        | 24.0 % | ✓ | 297.26 ± 8.90     | 1731.53 ± 51.68     | 0.9965 |
| 21F15934        | 24.0 % | ✓ | 688.46 ± 42.03    | 3629.96 ± 221.48    | 0.9992 |
| 21F15936        | 24.0 % | ✓ | 2556.66 ± 2894.73 | 12951.28 ± 14663.14 | 0.9999 |
| 21F15937        | 24.0 % | ✓ | 737.66 ± 91.32    | 3948.40 ± 488.58    | 0.9994 |
| 21F15939        | 24.0 % | ✓ | 1494.86 ± 331.01  | 7584.19 ± 1679.19   | 0.9998 |
| 21F15940        | 24.0 % | ✓ | 3470.77 ± 3715.14 | 17091.62 ± 18294.62 | 1.0000 |
| 21F15942        | 24.0 % | ✓ | 2140.42 ± 626.59  | 10768.16 ± 3152.19  | 0.9999 |
| 21F15943        | 24.0 % | ✓ | 607.68 ± 168.98   | 3334.25 ± 926.75    | 0.9987 |
| 21F15945        | 24.0 % | ✓ | 407.96 ± 24.25    | 2313.32 ± 137.39    | 0.9987 |
| 21F15946        | 24.0 % | ✓ | 365.40 ± 12.67    | 2130.70 ± 73.81     | 0.9982 |
| 21F15948        | 24.0 % | ✓ | 473.23 ± 20.13    | 2639.49 ± 112.20    | 0.9988 |
| 21F15949        | 24.0 % | ✓ | 1116.30 ± 151.44  | 5798.45 ± 786.48    | 0.9997 |
| 21F15951        | 24.0 % | ✓ | 675.61 ± 40.97    | 3628.95 ± 219.99    | 0.9994 |
| 21F15952        | 24.0 % | ✓ | 685.00 ± 52.20    | 3648.53 ± 277.92    | 0.9994 |
| 21F15954        | 24.0 % | ✓ | 487.45 ± 36.91    | 2752.37 ± 208.23    | 0.9986 |
| 21F15955        | 24.0 % | ✓ | 351.61 ± 60.21    | 2051.90 ± 350.52    | 0.9967 |
| 21F15957        | 24.0 % | ✓ | 356.91 ± 47.13    | 1970.52 ± 259.74    | 0.9970 |
| 21F15958        | 24.0 % | ✓ | 377.33 ± 29.20    | 2172.98 ± 167.96    | 0.9982 |
| 21F15960        | 24.0 % | ✓ | 275.20 ± 16.78    | 1600.88 ± 97.35     | 0.9959 |
| 21F15961        | 24.0 % | ✓ | 698.68 ± 48.15    | 3610.73 ± 248.72    | 0.9992 |
| 21F15963        | 24.0 % | ✓ | 693.41 ± 76.66    | 3702.46 ± 409.18    | 0.9994 |
| 21F15964        | 24.0 % | ✓ | 230.92 ± 6.90     | 1406.14 ± 41.85     | 0.9952 |
| 21F15966        | 24.0 % | ✓ | 372.69 ± 27.07    | 2154.35 ± 156.25    | 0.9979 |
| 21F15967        | 24.0 % | ✓ | 1003.37 ± 145.64  | 5125.66 ± 743.81    | 0.9996 |

| Results         | 40(a)/36(a) ± 2σ      | 40(r)/39(k) ± 2σ           | Age ± 2σ (Ma)        | MSWD            |
|-----------------|-----------------------|----------------------------|----------------------|-----------------|
| Normal Isochron | 304.17 ± 32.51        | 4.85425 ± 0.06624          | 14.64 ± 0.20         | 18.87           |
| No Convergence  | ± 10.69%              | ± 1.36%                    | ± 1.38%              | 0%              |
|                 |                       | Full External Error ± 0.79 |                      |                 |
|                 |                       | Analytical Error ± 0.20    |                      |                 |
| Statistics      | 2σ Confidence Limit   | 1.53                       | Convergence          | 0.000167238621  |
|                 | Error Magnification   | 4.3441                     | Number of Iterations | 100             |
|                 | Number of Data Points | 30                         | Calculated Line      | Weighted York-2 |

| Inverse Isochron |        |   | 39(k)/40(a+r) ± 2σ    | 36(a)/40(a+r) ± 2σ      | r.i.   |
|------------------|--------|---|-----------------------|-------------------------|--------|
| 21F15924         | 24.0 % | ✓ | 0.1663810 ± 0.0004966 | 0.00065675 ± 0.00001988 | 0.0140 |
| 21F15925         | 24.0 % | ✓ | 0.1878850 ± 0.0003195 | 0.00027496 ± 0.00001206 | 0.0054 |
| 21F15927         | 24.0 % | ✓ | 0.1984988 ± 0.0004447 | 0.00017585 ± 0.00001728 | 0.0038 |
| 21F15928         | 24.0 % | ✓ | 0.1744480 ± 0.0004718 | 0.00039122 ± 0.00001803 | 0.0091 |
| 21F15930         | 24.0 % | ✓ | 0.1863031 ± 0.0005079 | 0.00034333 ± 0.00001890 | 0.0082 |
| 21F15931         | 24.0 % | ✓ | 0.1946019 ± 0.0004413 | 0.00014507 ± 0.00001597 | 0.0037 |
| 21F15933         | 24.0 % | ✓ | 0.1716759 ± 0.0004323 | 0.00057752 ± 0.00001724 | 0.0112 |
| 21F15934         | 24.0 % | ✓ | 0.1896607 ± 0.0004554 | 0.00027549 ± 0.00001681 | 0.0062 |
| 21F15936         | 24.0 % | ✓ | 0.1974059 ± 0.0026913 | 0.00007721 ± 0.00008742 | 0.0021 |
| 21F15937         | 24.0 % | ✓ | 0.1868240 ± 0.0008127 | 0.00025327 ± 0.00003134 | 0.0063 |
| 21F15939         | 24.0 % | ✓ | 0.1971020 ± 0.0008458 | 0.00013185 ± 0.00002919 | 0.0045 |
| 21F15940         | 24.0 % | ✓ | 0.2030686 ± 0.0018116 | 0.00005851 ± 0.00006263 | 0.0018 |
| 21F15942         | 24.0 % | ✓ | 0.1987726 ± 0.0007852 | 0.00009287 ± 0.00002718 | 0.0046 |
| 21F15943         | 24.0 % | ✓ | 0.1822530 ± 0.0026236 | 0.00029992 ± 0.00008336 | 0.0171 |
| 21F15945         | 24.0 % | ✓ | 0.1763548 ± 0.0005405 | 0.00043228 ± 0.00002567 | 0.0081 |
| 21F15946         | 24.0 % | ✓ | 0.1714921 ± 0.0003569 | 0.00046933 ± 0.00001626 | 0.0079 |
| 21F15948         | 24.0 % | ✓ | 0.1792905 ± 0.0003679 | 0.00037886 ± 0.00001610 | 0.0073 |
| 21F15949         | 24.0 % | ✓ | 0.1925164 ± 0.0006711 | 0.00017246 ± 0.00002339 | 0.0042 |
| 21F15951         | 24.0 % | ✓ | 0.1861716 ± 0.0003894 | 0.00027556 ± 0.00001670 | 0.0045 |
| 21F15952         | 24.0 % | ✓ | 0.1877477 ± 0.0004942 | 0.00027408 ± 0.00002088 | 0.0054 |
| 21F15954         | 24.0 % | ✓ | 0.1771005 ± 0.0007076 | 0.00036332 ± 0.00002749 | 0.0080 |
| 21F15955         | 24.0 % | ✓ | 0.1713573 ± 0.0023928 | 0.00048735 ± 0.00008325 | 0.0117 |
| 21F15957         | 24.0 % | ✓ | 0.1811253 ± 0.0018644 | 0.00050748 ± 0.00006689 | 0.0148 |
| 21F15958         | 24.0 % | ✓ | 0.1736455 ± 0.0007959 | 0.00046020 ± 0.00003557 | 0.0099 |
| 21F15960         | 24.0 % | ✓ | 0.1719024 ± 0.0009491 | 0.00062466 ± 0.00003798 | 0.0161 |
| 21F15961         | 24.0 % | ✓ | 0.1935017 ± 0.0005348 | 0.00027695 ± 0.00001908 | 0.0070 |
| 21F15963         | 24.0 % | ✓ | 0.1872835 ± 0.0007208 | 0.00027009 ± 0.00002985 | 0.0062 |
| 21F15964         | 24.0 % | ✓ | 0.1642217 ± 0.0004797 | 0.00071116 ± 0.00002116 | 0.0140 |
| 21F15966         | 24.0 % | ✓ | 0.1729934 ± 0.0008215 | 0.00046418 ± 0.00003367 | 0.0103 |
| 21F15967         | 24.0 % | ✓ | 0.1957548 ± 0.0007733 | 0.00019510 ± 0.00002831 | 0.0059 |

| Results          | 40(a)/36(a) ± 2σ      | 40(r)/39(k) ± 2σ           | Age ± 2σ (Ma)        | MSWD            |
|------------------|-----------------------|----------------------------|----------------------|-----------------|
| Inverse Isochron | 322.73 ± 34.88        | 4.84375 ± 0.06858          | 14.61 ± 0.21         | 17.85           |
| Error Chron      | ± 10.81%              | ± 1.42%                    | ± 1.43%              | 0%              |
|                  |                       | Full External Error ± 0.79 |                      |                 |
|                  |                       | Analytical Error ± 0.21    |                      |                 |
| Statistics       | 2σ Confidence Limit   | 1.53                       | Convergence          | 0.0000060106    |
|                  | Error Magnification   | 4.2252                     | Number of Iterations | 4               |
|                  | Number of Data Points | 30                         | Calculated Line      | Weighted York-2 |
|                  | Spreading Factor      | 18.8%                      |                      |                 |

| Degassing Patterns |        |   | 36Ar(a)<br>[fA] | %1σ   | 36Ar(c)<br>[fA] | %1σ  | 36Ar(ca)<br>[fA] | %1σ  | 36Ar(cl)<br>[fA] | %1σ    | 37Ar(ca)<br>[fA] | %1σ  | 38Ar(a)<br>[fA] | %1σ   | 38Ar(c)<br>[fA] | %1σ  | 38Ar(k)<br>[fA] | %1σ  | 38Ar(ca)<br>[fA] | %1σ  | 38Ar(cl)<br>[fA] | %1σ    | 39Ar(k)<br>[fA] | %1σ  | 39Ar(ca)<br>[fA] | %1σ  | 40Ar(r)<br>[fA] | %1σ  | 40Ar(a)<br>[fA] | %1σ   | 40Ar(c)<br>[fA] | %1σ  | 40Ar(k)<br>[fA] | %1σ  |
|--------------------|--------|---|-----------------|-------|-----------------|------|------------------|------|------------------|--------|------------------|------|-----------------|-------|-----------------|------|-----------------|------|------------------|------|------------------|--------|-----------------|------|------------------|------|-----------------|------|-----------------|-------|-----------------|------|-----------------|------|
| 21F15924           | 24.0 % | ✓ | 0.0292619       | 1.51  | 0.0000000       | 0.00 | 0.0161057        | 0.30 | 0.0000000        | 0.00   | 59.5844          | 0.25 | 0.0055159       | 1.52  | 0.0000000       | 0.00 | 0.0895291       | 0.16 | 0.0107252        | 9.63 | 0.0000000        | 0.00   | 7.41319         | 0.14 | 0.0382830        | 0.95 | 35.81909        | 0.38 | 8.73642         | 1.52  | 0.0000000       | 0.00 | 0.0044998       | 9.65 |
| 21F15925           | 24.0 % | ✓ | 0.0227838       | 2.19  | 0.0000000       | 0.00 | 0.0307759        | 0.30 | 0.0000000        | 0.00   | 113.8582         | 0.24 | 0.0042947       | 2.20  | 0.0000000       | 0.00 | 0.1880250       | 0.12 | 0.0204945        | 9.63 | 0.0000000        | 0.00   | 15.56885        | 0.08 | 0.0731539        | 0.95 | 76.06138        | 0.20 | 6.80233         | 2.19  | 0.0000000       | 0.00 | 0.0094503       | 9.65 |
| 21F15927           | 24.0 % | ✓ | 0.0094451       | 4.91  | 0.0000000       | 0.00 | 0.0340836        | 0.30 | 0.0000000        | 0.00   | 126.0955         | 0.24 | 0.0017804       | 4.92  | 0.0000000       | 0.00 | 0.1287625       | 0.14 | 0.0226972        | 9.63 | 0.0000000        | 0.00   | 10.66180        | 0.10 | 0.0810164        | 0.95 | 50.89220        | 0.28 | 2.81994         | 4.91  | 0.0000000       | 0.00 | 0.0064717       | 9.65 |
| 21F15928           | 24.0 % | ✓ | 0.0180485       | 2.30  | 0.0000000       | 0.00 | 0.0226285        | 0.30 | 0.0000000        | 0.00   | 83.7162          | 0.25 | 0.0034022       | 2.31  | 0.0000000       | 0.00 | 0.0971957       | 0.15 | 0.0150689        | 9.63 | 0.0000000        | 0.00   | 8.04800         | 0.12 | 0.0537877        | 0.95 | 40.74551        | 0.31 | 5.38857         | 2.31  | 0.0000000       | 0.00 | 0.0048851       | 9.65 |
| 21F15930           | 24.0 % | ✓ | 0.0149318       | 2.75  | 0.0000000       | 0.00 | 0.0189874        | 0.30 | 0.0000008        | 133.42 | 70.2456          | 0.25 | 0.0028146       | 2.76  | 0.0000000       | 0.00 | 0.0978535       | 0.15 | 0.0126442        | 9.63 | 0.0068471        | 133.43 | 8.10247         | 0.12 | 0.0451328        | 0.95 | 39.03274        | 0.32 | 4.45804         | 2.75  | 0.0000000       | 0.00 | 0.0049182       | 9.65 |
| 21F15931           | 24.0 % | ✓ | 0.0078936       | 5.50  | 0.0000000       | 0.00 | 0.0303120        | 0.30 | 0.0000000        | 0.00   | 112.1420         | 0.24 | 0.0014879       | 5.51  | 0.0000000       | 0.00 | 0.1278802       | 0.14 | 0.0201856        | 9.63 | 0.0000000        | 0.00   | 10.58874        | 0.10 | 0.0720512        | 0.95 | 52.05563        | 0.25 | 2.35671         | 5.51  | 0.0000000       | 0.00 | 0.0064274       | 9.65 |
| 21F15933           | 24.0 % | ✓ | 0.0309754       | 1.49  | 0.0000000       | 0.00 | 0.0209506        | 0.30 | 0.0000000        | 0.00   | 77.5088          | 0.25 | 0.0058389       | 1.50  | 0.0000000       | 0.00 | 0.1112027       | 0.15 | 0.0139516        | 9.63 | 0.0000000        | 0.00   | 9.20781         | 0.12 | 0.0497994        | 0.95 | 44.38686        | 0.32 | 9.24800         | 1.50  | 0.0000000       | 0.00 | 0.0055891       | 9.65 |
| 21F15934           | 24.0 % | ✓ | 0.0138058       | 3.05  | 0.0000000       | 0.00 | 0.0179169        | 0.30 | 0.0000000        | 0.00   | 66.2852          | 0.25 | 0.0026024       | 3.05  | 0.0000000       | 0.00 | 0.1147887       | 0.14 | 0.0119313        | 9.63 | 0.0000000        | 0.00   | 9.50473         | 0.11 | 0.0425882        | 0.95 | 45.99256        | 0.28 | 4.12185         | 3.05  | 0.0000000       | 0.00 | 0.0057694       | 9.65 |
| 21F15936           | 24.0 % | ✓ | 0.0005895       | 56.61 | 0.0000000       | 0.00 | 0.0045637        | 0.37 | 0.0000000        | 0.00   | 16.8837          | 0.33 | 0.0001111       | 56.61 | 0.0000000       | 0.00 | 0.0182005       | 0.63 | 0.0030391        | 9.64 | 0.0000000        | 0.00   | 1.50704         | 0.62 | 0.0108478        | 0.98 | 7.45823         | 1.37 | 0.17599         | 56.61 | 0.0000000       | 0.00 | 0.0009148       | 9.67 |
| 21F15937           | 24.0 % | ✓ | 0.0063823       | 6.19  | 0.0000000       | 0.00 | 0.0149248        | 0.30 | 0.0000000        | 0.00   | 55.2157          | 0.25 | 0.0012031       | 6.19  | 0.0000000       | 0.00 | 0.0568578       | 0.22 | 0.0099388        | 9.63 | 0.0000000        | 0.00   | 4.70794         | 0.20 | 0.0354761        | 0.95 | 23.29438        | 0.52 | 1.90550         | 6.19  | 0.0000000       | 0.00 | 0.0028577       | 9.65 |
| 21F15939           | 24.0 % | ✓ | 0.0033324       | 11.07 | 0.0000000       | 0.00 | 0.0086266        | 0.32 | 0.0000002        | 526.86 | 31.9150          | 0.27 | 0.0006281       | 11.07 | 0.0000000       | 0.00 | 0.0601604       | 0.21 | 0.0057447        | 9.63 | 0.0017343        | 526.86 | 4.98141         | 0.19 | 0.0205054        | 0.96 | 24.27833        | 0.47 | 0.99491         | 11.07 | 0.0000000       | 0.00 | 0.0030237       | 9.65 |
| 21F15940           | 24.0 % | ✓ | 0.0006911       | 53.52 | 0.0000000       | 0.00 | 0.0058344        | 0.35 | 0.0000000        | 0.00   | 21.5848          | 0.30 | 0.0001303       | 53.52 | 0.0000000       | 0.00 | 0.0289672       | 0.41 | 0.0038853        | 9.63 | 0.0000000        | 0.00   | 2.39855         | 0.40 | 0.0138683        | 0.97 | 11.60518        | 0.97 | 0.20633         | 53.52 | 0.0000000       | 0.00 | 0.0014559       | 9.66 |
| 21F15942           | 24.0 % | ✓ | 0.0028243       | 14.64 | 0.0000000       | 0.00 | 0.0174502        | 0.30 | 0.0000000        | 0.00   | 64.5586          | 0.25 | 0.0005324       | 14.64 | 0.0000000       | 0.00 | 0.0730064       | 0.18 | 0.0116205        | 9.63 | 0.0000000        | 0.00   | 6.04507         | 0.16 | 0.0414789        | 0.95 | 29.56880        | 0.43 | 0.84321         | 14.64 | 0.0000000       | 0.00 | 0.0036694       | 9.65 |
| 21F15943           | 24.0 % | ✓ | 0.0025869       | 13.89 | 0.0000000       | 0.00 | 0.0044932        | 0.38 | 0.0000000        | 0.00   | 16.6231          | 0.34 | 0.0004876       | 13.89 | 0.0000000       | 0.00 | 0.0189850       | 0.60 | 0.0029922        | 9.64 | 0.0000000        | 0.00   | 1.57200         | 0.59 | 0.0106803        | 0.98 | 7.85302         | 1.44 | 0.77234         | 13.89 | 0.0000000       | 0.00 | 0.0009542       | 9.67 |
| 21F15945           | 24.0 % | ✓ | 0.0159777       | 2.97  | 0.0000000       | 0.00 | 0.0210929        | 0.30 | 0.0000000        | 0.00   | 78.0351          | 0.25 | 0.0030118       | 2.97  | 0.0000000       | 0.00 | 0.0787221       | 0.17 | 0.0140463        | 9.63 | 0.0000000        | 0.00   | 6.51835         | 0.14 | 0.0501376        | 0.95 | 32.19124        | 0.45 | 4.77031         | 2.97  | 0.0000000       | 0.00 | 0.0039566       | 9.65 |
| 21F15946           | 24.0 % | ✓ | 0.0284040       | 1.73  | 0.0000000       | 0.00 | 0.0273249        | 0.30 | 0.0000000        | 0.00   | 101.0908         | 0.25 | 0.0053542       | 1.74  | 0.0000000       | 0.00 | 0.1253442       | 0.13 | 0.0181963        | 9.63 | 0.0000000        | 0.00   | 10.37875        | 0.10 | 0.0649509        | 0.95 | 52.04002        | 0.29 | 8.48030         | 1.73  | 0.0000000       | 0.00 | 0.0062999       | 9.65 |
| 21F15948           | 24.0 % | ✓ | 0.0235015       | 2.13  | 0.0000000       | 0.00 | 0.0306649        | 0.30 | 0.0000000        | 0.00   | 113.4476         | 0.24 | 0.0044300       | 2.13  | 0.0000000       | 0.00 | 0.1343170       | 0.13 | 0.0204206        | 9.63 | 0.0000000        | 0.00   | 11.12172        | 0.09 | 0.0728901        | 0.95 | 55.01524        | 0.28 | 7.01660         | 2.13  | 0.0000000       | 0.00 | 0.0067509       | 9.65 |
| 21F15949           | 24.0 % | ✓ | 0.0056721       | 6.78  | 0.0000000       | 0.00 | 0.0219723        | 0.30 | 0.0000000        | 0.00   | 81.2885          | 0.25 | 0.0010692       | 6.78  | 0.0000000       | 0.00 | 0.0764689       | 0.18 | 0.0146319        | 9.63 | 0.0000000        | 0.00   | 6.33178         | 0.16 | 0.0522279        | 0.95 | 31.19608        | 0.38 | 1.69347         | 6.78  | 0.0000000       | 0.00 | 0.0038434       | 9.65 |
| 21F15951           | 24.0 % | ✓ | 0.0169449       | 3.03  | 0.0000000       | 0.00 | 0.0299888        | 0.30 | 0.0000000        | 0.00   | 110.9462         | 0.24 | 0.0031941       | 3.03  | 0.0000000       | 0.00 | 0.1382591       | 0.13 | 0.0199703        | 9.63 | 0.0000000        | 0.00   | 11.44813        | 0.10 | 0.0712830        | 0.95 | 56.43328        | 0.27 | 5.05908         | 3.03  | 0.0000000       | 0.00 | 0.0069490       | 9.65 |
| 21F15952           | 24.0 % | ✓ | 0.0122064       | 3.81  | 0.0000000       | 0.00 | 0.0220510        | 0.30 | 0.0000000        | 0.00   | 81.5799          | 0.25 | 0.0023009       | 3.81  | 0.0000000       | 0.00 | 0.1009806       | 0.15 | 0.0146844        | 9.63 | 0.0000000        | 0.00   | 8.36140         | 0.12 | 0.0524151        | 0.95 | 40.89097        | 0.34 | 3.64433         | 3.81  | 0.0000000       | 0.00 | 0.0050754       | 9.65 |
| 21F15954           | 24.0 % | ✓ | 0.0103403       | 3.78  | 0.0000000       | 0.00 | 0.0155727        | 0.30 | 0.0000000        | 0.00   | 57.6128          | 0.25 | 0.0019491       | 3.79  | 0.0000000       | 0.00 | 0.0608721       | 0.20 | 0.0103703        | 9.63 | 0.0000000        | 0.00   | 5.04033         | 0.18 | 0.0370162        | 0.95 | 25.37312        | 0.47 | 3.08719         | 3.78  | 0.0000000       | 0.00 | 0.0030595       | 9.65 |
| 21F15955           | 24.0 % | ✓ | 0.0039499       | 8.54  | 0.0000000       | 0.00 | 0.0047324        | 0.36 | 0.0000002        | 494.42 | 17.5078          | 0.32 | 0.0007446       | 8.54  | 0.0000000       | 0.00 | 0.0167728       | 0.65 | 0.0031514        | 9.64 | 0.0019011        | 494.42 | 1.38883         | 0.65 | 0.0112488        | 0.97 | 6.92556         | 1.49 | 1.17929         | 8.54  | 0.0000000       | 0.00 | 0.0008430       | 9.67 |
| 21F15957           | 24.0 % | ✓ | 0.0054609       | 6.59  | 0.0000000       | 0.00 | 0.0031608        | 0.45 | 0.0000009        | 129.08 | 11.6938          | 0.42 | 0.0010294       | 6.59  | 0.0000000       | 0.00 | 0.0235386       | 0.47 | 0.0021049        | 9.64 | 0.0072117        | 129.09 | 1.94905         | 0.46 | 0.0075133        | 1.01 | 9.13036         | 1.21 | 1.63040         | 6.59  | 0.0000000       | 0.00 | 0.0011831       | 9.66 |
| 21F15958           | 24.0 % | ✓ | 0.0114201       | 3.86  | 0.0000000       | 0.00 | 0.0146247        | 0.30 | 0.0000000        | 0.00   | 54.1054          | 0.25 | 0.0021527       | 3.87  | 0.0000000       | 0.00 | 0.0520413       | 0.23 | 0.0097390        | 9.63 | 0.0000000        | 0.00   | 4.30913         | 0.21 | 0.0347627        | 0.95 | 21.40607        | 0.63 | 3.40958         | 3.86  | 0.0000000       | 0.00 | 0.0026156       | 9.65 |
| 21F15960           | 24.0 % | ✓ | 0.0126236       | 3.04  | 0.0000000       | 0.00 | 0.0096654        | 0.32 | 0.0000000        | 0.00   | 35.7581          | 0.27 | 0.0023796       | 3.04  | 0.0000000       | 0.00 | 0.0419552       | 0.27 | 0.0064365        | 9.63 | 0.0000000        | 0.00   | 3.47397         | 0.25 | 0.0229746        | 0.96 | 16.44006        | 0.71 | 3.76892         | 3.04  | 0.0000000       | 0.00 | 0.0021087       | 9.65 |
| 21F15961           | 24.0 % | ✓ | 0.0111484       | 3.44  | 0.0000000       | 0.00 | 0.0188328        | 0.30 | 0.0000000        | 0.00   | 69.6738          | 0.25 | 0.0021015       | 3.45  | 0.0000000       | 0.00 | 0.0940704       | 0.15 | 0.0125413        | 9.63 | 0.0000000        | 0.00   | 7.78922         | 0.13 | 0.0447654        | 0.95 | 36.92552        | 0.32 | 3.32848         | 3.45  | 0.0000000       | 0.00 | 0.0047281       | 9.65 |
| 21F15963           | 24.0 % | ✓ | 0.0079692       | 5.53  | 0.0000000       | 0.00 | 0.0130236        | 0.31 | 0.0000000        | 0.00   | 48.1821          | 0.25 | 0.0015022       | 5.53  | 0.0000000       | 0.00 | 0.0667366       | 0.20 | 0.0086728        | 9.63 | 0.0000000        | 0.00   | 5.52592         | 0.17 | 0.0309570        | 0.95 | 27.12636        | 0.49 | 2.37929         | 5.53  | 0.0000000       | 0.00 | 0.0033542       | 9.65 |
| 21F15964           | 24.0 % | ✓ | 0.0314796       | 1.49  | 0.0000000       | 0.00 | 0.0197133        | 0.30 | 0.0000000        | 0.00   | 72.9314          | 0.25 | 0.0059339       | 1.50  | 0.0000000       | 0.00 | 0.0877907       | 0.16 | 0.0131276        | 9.63 | 0.0000000        | 0.00   | 7.26925         | 0.14 | 0.0468584        | 0.95 | 34.86629        | 0.41 | 9.39854         | 1.49  | 0.0000000       | 0.00 | 0.0044124       | 9.65 |
| 21F15966           | 24.0 % | ✓ | 0.0114023       | 3.63  | 0.0000000       | 0.00 | 0.0121289        | 0.31 | 0.0000003        | 391.70 | 44.8720          | 0.26 | 0.0021493       | 3.63  | 0.0000000       | 0.00 | 0.0513214       | 0.24 | 0.0080770        | 9.63 | 0.0023362        | 391.70 | 4.24952         | 0.22 | 0.0288303        | 0.96 | 21.16033        | 0.59 | 3.40428         | 3.63  | 0.0000000       | 0.00 | 0.0025795       | 9.65 |
| 21F15967           | 24.0 % | ✓ | 0.0052818       | 7.26  | 0.0000000       | 0.00 | 0.0139375        | 0.31 | 0.0000005        | 240.10 | 51.5632          | 0.26 | 0.0009956       | 7.26  | 0.0000000       | 0.00 | 0.0640031       | 0.20 | 0.0092814        | 9.63 | 0.0038773        | 240.11 | 5.29959         | 0.17 | 0.0331294        | 0.95 | 25.49567        | 0.46 | 1.57693         | 7.26  | 0.0000000       | 0.00 | 0.0032169       | 9.65 |
| Σ                  |        |   | 0.3773350</     |       |                 |      |                  |      |                  |        |                  |      |                 |       |                 |      |                 |      |                  |      |                  |        |                 |      |                  |      |                 |      |                 |       |                 |      |                 |      |



| Additional Parameters |        |   | 40Ar/39Ar | 1σ       | 37Ar/39Ar | 1σ       | 36Ar/39Ar | 1σ       | Time (days) | 37Ar (decay) | 39Ar (decay) | 40Ar (moles) |
|-----------------------|--------|---|-----------|----------|-----------|----------|-----------|----------|-------------|--------------|--------------|--------------|
| 21F15924              | 24.0 % | ✓ | 5.980026  | 0.008879 | 7.996329  | 0.022848 | 0.006088  | 0.000060 | 72.878      | 4.228992     | 1.00051525   | 1.577E-12    |
| 21F15925              | 24.0 % | ✓ | 5.298117  | 0.004481 | 7.279005  | 0.018625 | 0.003424  | 0.000032 | 72.884      | 4.229456     | 1.00051528   | 2.934E-12    |
| 21F15927              | 24.0 % | ✓ | 5.000423  | 0.005554 | 11.737661 | 0.030840 | 0.004052  | 0.000042 | 72.896      | 4.230442     | 1.00051537   | 1.902E-12    |
| 21F15928              | 24.0 % | ✓ | 5.694913  | 0.007649 | 10.333052 | 0.028377 | 0.005021  | 0.000051 | 72.902      | 4.230964     | 1.00051541   | 1.633E-12    |
| 21F15930              | 24.0 % | ✓ | 5.338468  | 0.007237 | 8.621636  | 0.023874 | 0.004163  | 0.000050 | 72.914      | 4.231951     | 1.00051550   | 1.540E-12    |
| 21F15931              | 24.0 % | ✓ | 5.104570  | 0.005746 | 10.519105 | 0.027732 | 0.003584  | 0.000040 | 72.920      | 4.232473     | 1.00051554   | 1.926E-12    |
| 21F15933              | 24.0 % | ✓ | 5.794200  | 0.007254 | 8.372441  | 0.022829 | 0.005609  | 0.000050 | 72.932      | 4.233461     | 1.00051562   | 1.899E-12    |
| 21F15934              | 24.0 % | ✓ | 5.249659  | 0.006275 | 6.942801  | 0.018842 | 0.003323  | 0.000044 | 72.938      | 4.233983     | 1.00051567   | 1.774E-12    |
| 21F15936              | 24.0 % | ✓ | 5.030104  | 0.034084 | 11.123182 | 0.077788 | 0.003395  | 0.000221 | 72.950      | 4.234971     | 1.00051575   | 2.703E-13    |
| 21F15937              | 24.0 % | ✓ | 5.313200  | 0.011479 | 11.640489 | 0.037078 | 0.004492  | 0.000083 | 72.956      | 4.235493     | 1.00051579   | 8.922E-13    |
| 21F15939              | 24.0 % | ✓ | 5.053321  | 0.010806 | 6.380552  | 0.021033 | 0.002391  | 0.000074 | 72.968      | 4.236481     | 1.00051588   | 8.948E-13    |
| 21F15940              | 24.0 % | ✓ | 4.896738  | 0.021741 | 8.947404  | 0.044378 | 0.002705  | 0.000153 | 72.974      | 4.237004     | 1.00051592   | 4.182E-13    |
| 21F15942              | 24.0 % | ✓ | 4.997193  | 0.009820 | 10.606760 | 0.031383 | 0.003331  | 0.000068 | 72.986      | 4.237992     | 1.00051601   | 1.077E-12    |
| 21F15943              | 24.0 % | ✓ | 5.450454  | 0.039051 | 10.503129 | 0.070975 | 0.004473  | 0.000228 | 72.992      | 4.238516     | 1.00051605   | 3.054E-13    |
| 21F15945              | 24.0 % | ✓ | 5.627707  | 0.008558 | 11.880234 | 0.033723 | 0.005644  | 0.000072 | 73.004      | 4.239504     | 1.00051613   | 1.309E-12    |
| 21F15946              | 24.0 % | ✓ | 5.795512  | 0.005987 | 9.679595  | 0.025507 | 0.005336  | 0.000047 | 73.010      | 4.239969     | 1.00051617   | 2.143E-12    |
| 21F15948              | 24.0 % | ✓ | 5.541828  | 0.005644 | 10.134124 | 0.026494 | 0.004839  | 0.000044 | 73.022      | 4.241016     | 1.00051626   | 2.196E-12    |
| 21F15949              | 24.0 % | ✓ | 5.152471  | 0.008910 | 12.733159 | 0.037238 | 0.004330  | 0.000060 | 73.028      | 4.241482     | 1.00051630   | 1.164E-12    |
| 21F15951              | 24.0 % | ✓ | 5.338752  | 0.005544 | 9.631238  | 0.025281 | 0.004074  | 0.000044 | 73.040      | 4.242529     | 1.00051639   | 2.177E-12    |
| 21F15952              | 24.0 % | ✓ | 5.293719  | 0.006924 | 9.695940  | 0.026551 | 0.004072  | 0.000055 | 73.046      | 4.242995     | 1.00051643   | 1.577E-12    |
| 21F15954              | 24.0 % | ✓ | 5.605949  | 0.011123 | 11.347014 | 0.035249 | 0.005104  | 0.000077 | 73.058      | 4.244042     | 1.00051651   | 1.008E-12    |
| 21F15955              | 24.0 % | ✓ | 5.789474  | 0.040140 | 12.504933 | 0.089629 | 0.006201  | 0.000244 | 73.064      | 4.244508     | 1.00051655   | 2.869E-13    |
| 21F15957              | 24.0 % | ✓ | 5.500445  | 0.028219 | 5.976734  | 0.037136 | 0.004407  | 0.000185 | 73.076      | 4.245498     | 1.00051664   | 3.810E-13    |
| 21F15958              | 24.0 % | ✓ | 5.713374  | 0.012999 | 12.455514 | 0.040653 | 0.005996  | 0.000102 | 73.082      | 4.246022     | 1.00051668   | 8.786E-13    |
| 21F15960              | 24.0 % | ✓ | 5.779639  | 0.015865 | 10.225515 | 0.037216 | 0.006374  | 0.000110 | 73.094      | 4.247012     | 1.00051676   | 7.155E-13    |
| 21F15961              | 24.0 % | ✓ | 5.138987  | 0.007062 | 8.893792  | 0.024751 | 0.003827  | 0.000049 | 73.100      | 4.247537     | 1.00051681   | 1.425E-12    |
| 21F15963              | 24.0 % | ✓ | 5.310356  | 0.010168 | 8.670713  | 0.026671 | 0.003778  | 0.000079 | 73.112      | 4.248527     | 1.00051689   | 1.045E-12    |
| 21F15964              | 24.0 % | ✓ | 6.050930  | 0.008782 | 9.968605  | 0.028064 | 0.006997  | 0.000064 | 73.118      | 4.249052     | 1.00051694   | 1.567E-12    |
| 21F15966              | 24.0 % | ✓ | 5.742216  | 0.013552 | 10.488165 | 0.035351 | 0.005500  | 0.000097 | 73.130      | 4.250043     | 1.00051702   | 8.697E-13    |
| 21F15967              | 24.0 % | ✓ | 5.077299  | 0.009975 | 9.669220  | 0.029872 | 0.003604  | 0.000072 | 73.136      | 4.250567     | 1.00051706   | 9.585E-13    |

| Procedure<br>Blanks |        | 36Ar ± 1σ (SE)<br>[fA] | 37Ar ± 1σ (SE)<br>[fA] | 38Ar ± 1σ (SE)<br>[fA] | 39Ar ± 1σ (SE)<br>[fA] | 40Ar ± 1σ (SE)<br>[fA] |
|---------------------|--------|------------------------|------------------------|------------------------|------------------------|------------------------|
| 21F15924            | 24.0 % | 0.0137114 ± 0.0002020  | 0.0157879 ± 0.0060458  | 0.0088546 ± 0.0068163  | 0.0211712 ± 0.0063572  | 3.4943604 ± 0.0138976  |
| 21F15925            | 24.0 % | 0.0137114 ± 0.0002020  | 0.0157879 ± 0.0060458  | 0.0088546 ± 0.0068163  | 0.0211712 ± 0.0063572  | 3.4943604 ± 0.0138976  |
| 21F15927            | 24.0 % | 0.0125397 ± 0.0002037  | 0.0026001 ± 0.0057992  | 0.0033326 ± 0.0065048  | 0.0148767 ± 0.0058737  | 2.9404176 ± 0.0169544  |
| 21F15928            | 24.0 % | 0.0125397 ± 0.0002037  | 0.0026001 ± 0.0057992  | 0.0033326 ± 0.0065048  | 0.0148767 ± 0.0058737  | 2.9404176 ± 0.0169544  |
| 21F15930            | 24.0 % | 0.0120960 ± 0.0002084  | 0.0118281 ± 0.0061700  | 0.0001810 ± 0.0063607  | 0.0028231 ± 0.0066004  | 2.8954460 ± 0.0153499  |
| 21F15931            | 24.0 % | 0.0120960 ± 0.0002084  | 0.0118281 ± 0.0061700  | 0.0001810 ± 0.0063607  | 0.0028231 ± 0.0066004  | 2.8954460 ± 0.0153499  |
| 21F15933            | 24.0 % | 0.0118419 ± 0.0002082  | 0.0107122 ± 0.0060176  | 0.0061090 ± 0.0069373  | 0.0077970 ± 0.0064879  | 2.9131916 ± 0.0161729  |
| 21F15934            | 24.0 % | 0.0118419 ± 0.0002082  | 0.0107122 ± 0.0060176  | 0.0061090 ± 0.0069373  | 0.0077970 ± 0.0064879  | 2.9131916 ± 0.0161729  |
| 21F15936            | 24.0 % | 0.0128173 ± 0.0002105  | 0.0216152 ± 0.0063873  | 0.0087798 ± 0.0069034  | 0.0266635 ± 0.0064584  | 2.9344727 ± 0.0154446  |
| 21F15937            | 24.0 % | 0.0128173 ± 0.0002105  | 0.0216152 ± 0.0063873  | 0.0087798 ± 0.0069034  | 0.0266635 ± 0.0064584  | 2.9344727 ± 0.0154446  |
| 21F15939            | 24.0 % | 0.0140347 ± 0.0002191  | 0.0116480 ± 0.0061227  | 0.0007790 ± 0.0066763  | 0.0094411 ± 0.0062313  | 3.2454984 ± 0.0165704  |
| 21F15940            | 24.0 % | 0.0140347 ± 0.0002191  | 0.0116480 ± 0.0061227  | 0.0007790 ± 0.0066763  | 0.0094411 ± 0.0062313  | 3.2454984 ± 0.0165704  |
| 21F15942            | 24.0 % | 0.0122170 ± 0.0002231  | 0.0144978 ± 0.0065694  | 0.0066429 ± 0.0062554  | 0.0161749 ± 0.0063794  | 2.7978724 ± 0.0302161  |
| 21F15943            | 24.0 % | 0.0122170 ± 0.0002231  | 0.0144978 ± 0.0065694  | 0.0066429 ± 0.0062554  | 0.0161749 ± 0.0063794  | 2.7978724 ± 0.0302161  |
| 21F15945            | 24.0 % | 0.0128655 ± 0.0002326  | 0.0087694 ± 0.0064036  | 0.0050850 ± 0.0072661  | 0.0243713 ± 0.0057803  | 2.9875087 ± 0.0132021  |
| 21F15946            | 24.0 % | 0.0128655 ± 0.0002326  | 0.0087694 ± 0.0064036  | 0.0050850 ± 0.0072661  | 0.0243713 ± 0.0057803  | 2.9875087 ± 0.0132021  |
| 21F15948            | 24.0 % | 0.0139882 ± 0.0001938  | 0.0085792 ± 0.0064076  | 0.0006297 ± 0.0062294  | 0.0179120 ± 0.0066110  | 3.4076925 ± 0.0158190  |
| 21F15949            | 24.0 % | 0.0139882 ± 0.0001938  | 0.0085792 ± 0.0064076  | 0.0006297 ± 0.0062294  | 0.0179120 ± 0.0066110  | 3.4076925 ± 0.0158190  |
| 21F15951            | 24.0 % | 0.0123651 ± 0.0002055  | 0.0181067 ± 0.0057402  | 0.0001232 ± 0.0063942  | 0.0169554 ± 0.0058904  | 2.9203370 ± 0.0157904  |
| 21F15952            | 24.0 % | 0.0123651 ± 0.0002055  | 0.0181067 ± 0.0057402  | 0.0001232 ± 0.0063942  | 0.0169554 ± 0.0058904  | 2.9203370 ± 0.0157904  |
| 21F15954            | 24.0 % | 0.0126987 ± 0.0002140  | 0.0127255 ± 0.0062886  | 0.0069412 ± 0.0063259  | 0.0223097 ± 0.0057708  | 2.8876617 ± 0.0138144  |
| 21F15955            | 24.0 % | 0.0126987 ± 0.0002140  | 0.0127255 ± 0.0062886  | 0.0069412 ± 0.0063259  | 0.0223097 ± 0.0057708  | 2.8876617 ± 0.0138144  |
| 21F15957            | 24.0 % | 0.0123827 ± 0.0002366  | 0.0207211 ± 0.0067506  | 0.0021534 ± 0.0067432  | 0.0123874 ± 0.0060861  | 2.9518062 ± 0.0159317  |
| 21F15958            | 24.0 % | 0.0123827 ± 0.0002366  | 0.0207211 ± 0.0067506  | 0.0021534 ± 0.0067432  | 0.0123874 ± 0.0060861  | 2.9518062 ± 0.0159317  |
| 21F15960            | 24.0 % | 0.0121200 ± 0.0002055  | 0.0075423 ± 0.0065566  | 0.0054337 ± 0.0070981  | 0.0184012 ± 0.0059207  | 2.9230246 ± 0.0158341  |
| 21F15961            | 24.0 % | 0.0121200 ± 0.0002055  | 0.0075423 ± 0.0065566  | 0.0054337 ± 0.0070981  | 0.0184012 ± 0.0059207  | 2.9230246 ± 0.0158341  |
| 21F15963            | 24.0 % | 0.0129592 ± 0.0002390  | 0.0083650 ± 0.0059641  | 0.0081974 ± 0.0062722  | 0.0056588 ± 0.0061150  | 2.9496692 ± 0.0151158  |
| 21F15964            | 24.0 % | 0.0129592 ± 0.0002390  | 0.0083650 ± 0.0059641  | 0.0081974 ± 0.0062722  | 0.0056588 ± 0.0061150  | 2.9496692 ± 0.0151158  |
| 21F15966            | 24.0 % | 0.0128455 ± 0.0002376  | 0.0112636 ± 0.0061660  | 0.0011056 ± 0.0062934  | 0.0153073 ± 0.0059582  | 2.9822199 ± 0.0153260  |
| 21F15967            | 24.0 % | 0.0128455 ± 0.0002376  | 0.0112636 ± 0.0061660  | 0.0011056 ± 0.0062934  | 0.0153073 ± 0.0059582  | 2.9822199 ± 0.0153260  |

| Intercept Values |        | 36Ar ± 1σ (SE)<br>[fA] | r2     | Regression<br>(type,n) | 37Ar ± 1σ (SE)<br>[fA] | r2     | Regression<br>(type,n) | 38Ar ± 1σ (SE)<br>[fA] | r2     | Regression<br>(type,n) | 39Ar ± 1σ (SE)<br>[fA] | r2     | Regression<br>(type,n) | 40Ar ± 1σ (SE)<br>[fA] | r2     | Regression<br>(type,n) |
|------------------|--------|------------------------|--------|------------------------|------------------------|--------|------------------------|------------------------|--------|------------------------|------------------------|--------|------------------------|------------------------|--------|------------------------|
| 21F15924         | 24.0 % | 0.0565365 ± 0.0003558  | 0.1860 | EXP 148 of 150         | 14.018892 ± 0.008021   | 0.9966 | EXP 150 of 150         | 0.1031121 ± 0.0064639  | 0.0323 | EXP 149 of 150         | 7.4535904 ± 0.0073989  | 0.9913 | EXP 150 of 150         | 48.054375 ± 0.020831   | 0.9848 | EXP 150 of 150         |
| 21F15925         | 24.0 % | 0.0642695 ± 0.0004088  | 0.1089 | EXP 150 of 150         | 26.770987 ± 0.009261   | 0.9988 | EXP 148 of 150         | 0.1962425 ± 0.0063517  | 0.0444 | EXP 148 of 150         | 15.6231724 ± 0.0082966 | 0.9977 | EXP 150 of 150         | 86.367526 ± 0.022256   | 0.9984 | EXP 150 of 150         |
| 21F15927         | 24.0 % | 0.0536291 ± 0.0003698  | 0.2959 | EXP 149 of 150         | 29.626495 ± 0.008322   | 0.9992 | EXP 150 of 150         | 0.1404884 ± 0.0074380  | 0.0307 | EXP 150 of 150         | 10.7302171 ± 0.0079949 | 0.9952 | EXP 150 of 150         | 56.659031 ± 0.017882   | 0.9946 | EXP 149 of 150         |
| 21F15928         | 24.0 % | 0.0509372 ± 0.0003234  | 0.4699 | EXP 147 of 150         | 19.667799 ± 0.008150   | 0.9982 | EXP 150 of 150         | 0.1020385 ± 0.0067821  | 0.0124 | EXP 150 of 150         | 8.0959434 ± 0.0073397  | 0.9928 | EXP 148 of 150         | 49.079390 ± 0.017858   | 0.9891 | EXP 149 of 150         |
| 21F15930         | 24.0 % | 0.0441151 ± 0.0003184  | 0.5099 | EXP 149 of 150         | 16.508907 ± 0.007948   | 0.9976 | EXP 150 of 150         | 0.1198486 ± 0.0063826  | 0.0574 | EXP 150 of 150         | 8.1295859 ± 0.0068230  | 0.9939 | EXP 148 of 150         | 46.391153 ± 0.018580   | 0.9832 | EXP 150 of 150         |
| 21F15931         | 24.0 % | 0.0481605 ± 0.0003378  | 0.4289 | EXP 150 of 150         | 26.344950 ± 0.008161   | 0.9990 | EXP 150 of 150         | 0.1373327 ± 0.0067415  | 0.0425 | EXP 150 of 150         | 10.6363505 ± 0.0073863 | 0.9958 | EXP 150 of 150         | 57.314208 ± 0.021337   | 0.9932 | EXP 150 of 150         |
| 21F15933         | 24.0 % | 0.0608579 ± 0.0003700  | 0.1794 | EXP 147 of 150         | 18.207042 ± 0.008179   | 0.9979 | EXP 150 of 150         | 0.1207358 ± 0.0054806  | 0.0353 | EXP 146 of 150         | 9.2417305 ± 0.0077082  | 0.9939 | EXP 150 of 150         | 56.553645 ± 0.018580   | 0.9947 | EXP 149 of 150         |
| 21F15934         | 24.0 % | 0.0417868 ± 0.0003312  | 0.5869 | EXP 150 of 150         | 15.570206 ± 0.007720   | 0.9974 | EXP 149 of 150         | 0.1149732 ± 0.0065064  | 0.0205 | EXP 149 of 150         | 9.5306998 ± 0.0071991  | 0.9951 | EXP 150 of 150         | 53.033376 ± 0.017571   | 0.9926 | EXP 150 of 150         |
| 21F15936         | 24.0 % | 0.0176816 ± 0.0002336  | 0.8738 | EXP 150 of 150         | 3.983908 ± 0.006616    | 0.9697 | EXP 150 of 150         | 0.0187547 ± 0.0067334  | 0.0001 | EXP 150 of 150         | 1.5406689 ± 0.0066665  | 0.7725 | EXP 149 of 150         | 10.569606 ± 0.015404   | 0.9956 | EXP 150 of 150         |
| 21F15937         | 24.0 % | 0.0329303 ± 0.0003028  | 0.7338 | EXP 150 of 150         | 12.978092 ± 0.007193   | 0.9968 | EXP 148 of 150         | 0.0563745 ± 0.0065763  | 0.0054 | EXP 149 of 150         | 4.7579493 ± 0.0063393  | 0.9830 | EXP 150 of 150         | 28.137206 ± 0.017230   | 0.8965 | EXP 150 of 150         |
| 21F15939         | 24.0 % | 0.0253237 ± 0.0002687  | 0.8328 | EXP 146 of 150         | 7.498809 ± 0.007176    | 0.9903 | EXP 149 of 150         | 0.0687670 ± 0.0061546  | 0.0079 | EXP 150 of 150         | 4.9985574 ± 0.0066603  | 0.9828 | EXP 150 of 150         | 28.521760 ± 0.020143   | 0.8321 | EXP 150 of 150         |
| 21F15940         | 24.0 % | 0.0201944 ± 0.0002710  | 0.8165 | EXP 150 of 150         | 5.074768 ± 0.006965    | 0.9802 | EXP 150 of 150         | 0.0256430 ± 0.0067104  | 0.0047 | EXP 150 of 150         | 2.4156841 ± 0.0070569  | 0.9055 | EXP 150 of 150         | 15.058458 ± 0.017805   | 0.9903 | EXP 150 of 150         |
| 21F15942         | 24.0 % | 0.0313553 ± 0.0003147  | 0.6915 | EXP 150 of 150         | 15.154370 ± 0.007828   | 0.9972 | EXP 150 of 150         | 0.0737676 ± 0.0073465  | 0.0000 | EXP 149 of 150         | 6.0871576 ± 0.0068012  | 0.9888 | EXP 150 of 150         | 33.213551 ± 0.017977   | 0.3653 | EXP 150 of 150         |
| 21F15943         | 24.0 % | 0.0189004 ± 0.0002548  | 0.8768 | EXP 149 of 150         | 3.912356 ± 0.006558    | 0.9712 | EXP 146 of 150         | 0.0192294 ± 0.0065061  | 0.0003 | EXP 147 of 150         | 1.5948054 ± 0.0066457  | 0.7743 | EXP 150 of 150         | 11.424193 ± 0.018986   | 0.9946 | EXP 150 of 150         |
| 21F15945         | 24.0 % | 0.0478586 ± 0.0003736  | 0.3797 | EXP 150 of 150         | 18.302548 ± 0.008474   | 0.9977 | EXP 148 of 150         | 0.0925808 ± 0.0067979  | 0.0381 | EXP 150 of 150         | 6.5760529 ± 0.0065536  | 0.9911 | EXP 149 of 150         | 39.953017 ± 0.018103   | 0.9446 | EXP 150 of 150         |
| 21F15946         | 24.0 % | 0.0654712 ± 0.0003848  | 0.0948 | EXP 150 of 150         | 23.704894 ± 0.009751   | 0.9982 | EXP 150 of 150         | 0.1273290 ± 0.0070779  | 0.0018 | EXP 150 of 150         | 10.4413587 ± 0.0069980 | 0.9962 | EXP 149 of 150         | 63.514129 ± 0.018597   | 0.9967 | EXP 148 of 150         |
| 21F15948         | 24.0 % | 0.0651190 ± 0.0004126  | 0.0723 | EXP 150 of 150         | 26.594607 ± 0.009229   | 0.9987 | EXP 150 of 150         | 0.1451043 ± 0.0065973  | 0.0434 | EXP 150 of 150         | 11.1838805 ± 0.0067158 | 0.9969 | EXP 150 of 150         | 65.446284 ± 0.018991   | 0.9970 | EXP 150 of 150         |
| 21F15949         | 24.0 % | 0.0400834 ± 0.0002976  | 0.6569 | EXP 149 of 150         | 19.056169 ± 0.007663   | 0.9983 | EXP 150 of 150         | 0.0856531 ± 0.0069540  | 0.0250 | EXP 150 of 150         | 6.3855842 ± 0.0071350  | 0.9889 | EXP 149 of 150         | 36.301090 ± 0.016747   | 0.8568 | EXP 150 of 150         |
| 21F15951         | 24.0 % | 0.0566686 ± 0.0004248  | 0.2399 | EXP 150 of 150         | 26.008687 ± 0.009186   | 0.9987 | EXP 150 of 150         | 0.1509187 ± 0.0069512  | 0.0713 | EXP 149 of 150         | 11.5068984 ± 0.0081891 | 0.9956 | EXP 150 of 150         | 64.419642 ± 0.016906   | 0.9975 | EXP 148 of 150         |
| 21F15952         | 24.0 % | 0.0447027 ± 0.0003790  | 0.4495 | EXP 150 of 150         | 19.127141 ± 0.008261   | 0.9980 | EXP 150 of 150         | 0.1131254 ± 0.0059456  | 0.0675 | EXP 150 of 150         | 8.4092449 ± 0.0074239  | 0.9932 | EXP 150 of 150         | 47.460719 ± 0.016883   | 0.9877 | EXP 148 of 150         |
| 21F15954         | 24.0 % | 0.0371595 ± 0.0002947  | 0.6658 | EXP 148 of 150         | 13.504446 ± 0.007588   | 0.9966 | EXP 150 of 150         | 0.0683240 ± 0.0070952  | 0.0134 | EXP 150 of 150         | 5.0866699 ± 0.0069258  | 0.9828 | EXP 150 of 150         | 31.351034 ± 0.017230   | 0.1506 | EXP 146 of 150         |
| 21F15955         | 24.0 % | 0.0208947 ± 0.0002347  | 0.8516 | EXP 150 of 150         | 4.112248 ± 0.005990    | 0.9761 | EXP 147 of 150         | 0.0294187 ± 0.0068914  | 0.0044 | EXP 150 of 150         | 1.4188015 ± 0.0068213  | 0.7189 | EXP 150 of 150         | 10.993354 ± 0.016341   | 0.9946 | EXP 150 of 150         |
| 21F15957         | 24.0 % | 0.0205220 ± 0.0002428  | 0.8542 | EXP 150 of 150         | 2.758235 ± 0.006389    | 0.9432 | EXP 150 of 150         | 0.0358993 ± 0.0063569  | 0.0078 | EXP 150 of 150         | 1.9639397 ± 0.0065901  | 0.8718 | EXP 149 of 150         | 13.713748 ± 0.018116   | 0.9911 | EXP 150 of 150         |
| 21F15958         | 24.0 % | 0.0369679 ± 0.0003378  | 0.5915 | EXP 148 of 150         | 12.685175 ± 0.006712   | 0.9970 | EXP 150 of 150         | 0.0577363 ± 0.0067140  | 0.0000 | EXP 148 of 150         | 4.3451625 ± 0.0063740  | 0.9786 | EXP 149 of 150         | 27.770074 ± 0.016856   | 0.8941 | EXP 150 of 150         |
| 21F15960         | 24.0 % | 0.0331599 ± 0.0002946  | 0.7058 | EXP 149 of 150         | 8.375490 ± 0.006806    | 0.9931 | EXP 148 of 150         | 0.0514973 ± 0.0060799  | 0.0067 | EXP 148 of 150         | 3.5063997 ± 0.0061779  | 0.9709 | EXP 146 of 150         | 23.134114 ± 0.017344   | 0.9617 | EXP 149 of 150         |
| 21F15961         | 24.0 % | 0.0404211 ± 0.0002899  | 0.5929 | EXP 149 of 150         | 16.310285 ± 0.008023   | 0.9974 | EXP 150 of 150         | 0.1104629 ± 0.0064030  | 0.0554 | EXP 150 of 150         | 7.8323370 ± 0.0070492  | 0.9930 | EXP 149 of 150         | 43.181757 ± 0.017060   | 0.9809 | EXP 150 of 150         |
| 21F15963         | 24.0 % | 0.0327756 ± 0.0003364  | 0.6663 | EXP 150 of 150         | 11.279706 ± 0.006992   | 0.9958 | EXP 149 of 150         | 0.0594761 ± 0.0058637  | 0.0028 | EXP 146 of 150         | 5.5483176 ± 0.0070662  | 0.9854 | EXP 150 of 150         | 32.458673 ± 0.018547   | 0.3143 | EXP 150 of 150         |
| 21F15964         | 24.0 % | 0.0612832 ± 0.0003587  | 0.1014 | EXP 150 of 150         | 17.067245 ± 0.007858   | 0.9977 | EXP 150 of 150         | 0.0924069 ± 0.0062597  | 0.0020 | EXP 147 of 150         | 7.3030413 ± 0.0070522  | 0.9915 | EXP 150 of 150         | 47.218908 ± 0.019166   | 0.9867 | EXP 150 of 150         |
| 21F15966         | 24.0 % | 0.0350583 ± 0.0003053  | 0.6989 | EXP 149 of 150         | 10.504525 ± 0.007735   | 0.9941 | EXP 150 of 150         | 0.0647280 ± 0.0065422  | 0.0096 | EXP 149 of 150         | 4.2827057 ± 0.0068366  | 0.9761 | EXP 150 of 150         | 27.549412 ± 0.017349   | 0.8411 | EXP 150 of 150         |
| 21F15967         | 24.0 % | 0.0309882 ± 0.0002681  | 0.7337 | EXP 149 of 150         | 12.067771 ± 0.008365   | 0.9949 | EXP 150 of 150         | 0.0789431 ± 0.0067453  | 0.0111 | EXP 150 of 150         | 5.3343794 ± 0.0067063  | 0.9857 | EXP 150 of 150         | 30.058031 ± 0.019685   | 0.5273 | EXP 150 of 150         |

| Project Info |        | Analyst     | Irradiation | X-pos | Y-pos | Z/H-pos | Project                | Experiment | Nmb |
|--------------|--------|-------------|-------------|-------|-------|---------|------------------------|------------|-----|
| 21F15924     | 24.0 % | Dan Miggins | 21-OSU-04   | 0.00  | 0.00  | 5.22    | Oregon\Swenton (20-01) | 21F15920   | 01  |
| 21F15925     | 24.0 % | Dan Miggins | 21-OSU-04   | 0.00  | 0.00  | 5.22    | Oregon\Swenton (20-01) | 21F15920   | 01  |
| 21F15927     | 24.0 % | Dan Miggins | 21-OSU-04   | 0.00  | 0.00  | 5.22    | Oregon\Swenton (20-01) | 21F15920   | 01  |
| 21F15928     | 24.0 % | Dan Miggins | 21-OSU-04   | 0.00  | 0.00  | 5.22    | Oregon\Swenton (20-01) | 21F15920   | 01  |
| 21F15930     | 24.0 % | Dan Miggins | 21-OSU-04   | 0.00  | 0.00  | 5.22    | Oregon\Swenton (20-01) | 21F15920   | 01  |
| 21F15931     | 24.0 % | Dan Miggins | 21-OSU-04   | 0.00  | 0.00  | 5.22    | Oregon\Swenton (20-01) | 21F15920   | 01  |
| 21F15933     | 24.0 % | Dan Miggins | 21-OSU-04   | 0.00  | 0.00  | 5.22    | Oregon\Swenton (20-01) | 21F15920   | 01  |
| 21F15934     | 24.0 % | Dan Miggins | 21-OSU-04   | 0.00  | 0.00  | 5.22    | Oregon\Swenton (20-01) | 21F15920   | 01  |
| 21F15936     | 24.0 % | Dan Miggins | 21-OSU-04   | 0.00  | 0.00  | 5.22    | Oregon\Swenton (20-01) | 21F15920   | 01  |
| 21F15937     | 24.0 % | Dan Miggins | 21-OSU-04   | 0.00  | 0.00  | 5.22    | Oregon\Swenton (20-01) | 21F15920   | 01  |
| 21F15939     | 24.0 % | Dan Miggins | 21-OSU-04   | 0.00  | 0.00  | 5.22    | Oregon\Swenton (20-01) | 21F15920   | 01  |
| 21F15940     | 24.0 % | Dan Miggins | 21-OSU-04   | 0.00  | 0.00  | 5.22    | Oregon\Swenton (20-01) | 21F15920   | 01  |
| 21F15942     | 24.0 % | Dan Miggins | 21-OSU-04   | 0.00  | 0.00  | 5.22    | Oregon\Swenton (20-01) | 21F15920   | 01  |
| 21F15943     | 24.0 % | Dan Miggins | 21-OSU-04   | 0.00  | 0.00  | 5.22    | Oregon\Swenton (20-01) | 21F15920   | 01  |
| 21F15945     | 24.0 % | Dan Miggins | 21-OSU-04   | 0.00  | 0.00  | 5.22    | Oregon\Swenton (20-01) | 21F15920   | 01  |
| 21F15946     | 24.0 % | Dan Miggins | 21-OSU-04   | 0.00  | 0.00  | 5.22    | Oregon\Swenton (20-01) | 21F15920   | 01  |
| 21F15948     | 24.0 % | Dan Miggins | 21-OSU-04   | 0.00  | 0.00  | 5.22    | Oregon\Swenton (20-01) | 21F15920   | 01  |
| 21F15949     | 24.0 % | Dan Miggins | 21-OSU-04   | 0.00  | 0.00  | 5.22    | Oregon\Swenton (20-01) | 21F15920   | 01  |
| 21F15951     | 24.0 % | Dan Miggins | 21-OSU-04   | 0.00  | 0.00  | 5.22    | Oregon\Swenton (20-01) | 21F15920   | 01  |
| 21F15952     | 24.0 % | Dan Miggins | 21-OSU-04   | 0.00  | 0.00  | 5.22    | Oregon\Swenton (20-01) | 21F15920   | 01  |
| 21F15954     | 24.0 % | Dan Miggins | 21-OSU-04   | 0.00  | 0.00  | 5.22    | Oregon\Swenton (20-01) | 21F15920   | 01  |
| 21F15955     | 24.0 % | Dan Miggins | 21-OSU-04   | 0.00  | 0.00  | 5.22    | Oregon\Swenton (20-01) | 21F15920   | 01  |
| 21F15957     | 24.0 % | Dan Miggins | 21-OSU-04   | 0.00  | 0.00  | 5.22    | Oregon\Swenton (20-01) | 21F15920   | 01  |
| 21F15958     | 24.0 % | Dan Miggins | 21-OSU-04   | 0.00  | 0.00  | 5.22    | Oregon\Swenton (20-01) | 21F15920   | 01  |
| 21F15960     | 24.0 % | Dan Miggins | 21-OSU-04   | 0.00  | 0.00  | 5.22    | Oregon\Swenton (20-01) | 21F15920   | 01  |
| 21F15961     | 24.0 % | Dan Miggins | 21-OSU-04   | 0.00  | 0.00  | 5.22    | Oregon\Swenton (20-01) | 21F15920   | 01  |
| 21F15963     | 24.0 % | Dan Miggins | 21-OSU-04   | 0.00  | 0.00  | 5.22    | Oregon\Swenton (20-01) | 21F15920   | 01  |
| 21F15964     | 24.0 % | Dan Miggins | 21-OSU-04   | 0.00  | 0.00  | 5.22    | Oregon\Swenton (20-01) | 21F15920   | 01  |
| 21F15966     | 24.0 % | Dan Miggins | 21-OSU-04   | 0.00  | 0.00  | 5.22    | Oregon\Swenton (20-01) | 21F15920   | 01  |
| 21F15967     | 24.0 % | Dan Miggins | 21-OSU-04   | 0.00  | 0.00  | 5.22    | Oregon\Swenton (20-01) | 21F15920   | 01  |

| Sample Parameters |        | Sample    | Material    | Location | Standard Name   | Standard (in Ma) | %1σ   | Standard Reference  | Standard 40Ar/39Ar | %1σ   | J          | %1σ   | Air 40Ar/36Ar | %1σ   | MDF (lin)  | %1σ   | Volume Ratio | Sensitivity (mol/volt) | Day | Month | Year | Hour | Min | Resist |
|-------------------|--------|-----------|-------------|----------|-----------------|------------------|-------|---------------------|--------------------|-------|------------|-------|---------------|-------|------------|-------|--------------|------------------------|-----|-------|------|------|-----|--------|
| 21F15924          | 24.0 % | MS-17-DAM | Plagioclase | Unknown  | FCT-NM (4X6-21) | 28.201           | 0.082 | Kuiper et al (2008) | 9.38444            | 0.113 | 0.00165439 | 0.113 | 301.022       | 0.127 | 0.99795266 | 0.041 | 1            | 3.54E-14               | 28  | AUG   | 2021 | 12   | 36  | 1      |
| 21F15925          | 24.0 % | MS-17-DAM | Plagioclase | Unknown  | FCT-NM (4X6-21) | 28.201           | 0.082 | Kuiper et al (2008) | 9.38444            | 0.113 | 0.00165439 | 0.113 | 301.022       | 0.127 | 0.99795266 | 0.041 | 1            | 3.54E-14               | 28  | AUG   | 2021 | 12   | 44  | 1      |
| 21F15927          | 24.0 % | MS-17-DAM | Plagioclase | Unknown  | FCT-NM (4X6-21) | 28.201           | 0.082 | Kuiper et al (2008) | 9.38444            | 0.113 | 0.00165439 | 0.113 | 301.022       | 0.127 | 0.99795266 | 0.041 | 1            | 3.54E-14               | 28  | AUG   | 2021 | 13   | 1   | 1      |
| 21F15928          | 24.0 % | MS-17-DAM | Plagioclase | Unknown  | FCT-NM (4X6-21) | 28.201           | 0.082 | Kuiper et al (2008) | 9.38444            | 0.113 | 0.00165439 | 0.113 | 301.022       | 0.127 | 0.99795266 | 0.041 | 1            | 3.54E-14               | 28  | AUG   | 2021 | 13   | 10  | 1      |
| 21F15930          | 24.0 % | MS-17-DAM | Plagioclase | Unknown  | FCT-NM (4X6-21) | 28.201           | 0.082 | Kuiper et al (2008) | 9.38444            | 0.113 | 0.00165439 | 0.113 | 301.022       | 0.127 | 0.99795266 | 0.041 | 1            | 3.54E-14               | 28  | AUG   | 2021 | 13   | 27  | 1      |
| 21F15931          | 24.0 % | MS-17-DAM | Plagioclase | Unknown  | FCT-NM (4X6-21) | 28.201           | 0.082 | Kuiper et al (2008) | 9.38444            | 0.113 | 0.00165439 | 0.113 | 301.022       | 0.127 | 0.99795266 | 0.041 | 1            | 3.54E-14               | 28  | AUG   | 2021 | 13   | 36  | 1      |
| 21F15933          | 24.0 % | MS-17-DAM | Plagioclase | Unknown  | FCT-NM (4X6-21) | 28.201           | 0.082 | Kuiper et al (2008) | 9.38444            | 0.113 | 0.00165439 | 0.113 | 301.022       | 0.127 | 0.99795266 | 0.041 | 1            | 3.54E-14               | 28  | AUG   | 2021 | 13   | 53  | 1      |
| 21F15934          | 24.0 % | MS-17-DAM | Plagioclase | Unknown  | FCT-NM (4X6-21) | 28.201           | 0.082 | Kuiper et al (2008) | 9.38444            | 0.113 | 0.00165439 | 0.113 | 301.022       | 0.127 | 0.99795266 | 0.041 | 1            | 3.54E-14               | 28  | AUG   | 2021 | 14   | 2   | 1      |
| 21F15936          | 24.0 % | MS-17-DAM | Plagioclase | Unknown  | FCT-NM (4X6-21) | 28.201           | 0.082 | Kuiper et al (2008) | 9.38444            | 0.113 | 0.00165439 | 0.113 | 301.022       | 0.127 | 0.99795266 | 0.041 | 1            | 3.54E-14               | 28  | AUG   | 2021 | 14   | 19  | 1      |
| 21F15937          | 24.0 % | MS-17-DAM | Plagioclase | Unknown  | FCT-NM (4X6-21) | 28.201           | 0.082 | Kuiper et al (2008) | 9.38444            | 0.113 | 0.00165439 | 0.113 | 301.022       | 0.127 | 0.99795266 | 0.041 | 1            | 3.54E-14               | 28  | AUG   | 2021 | 14   | 28  | 1      |
| 21F15939          | 24.0 % | MS-17-DAM | Plagioclase | Unknown  | FCT-NM (4X6-21) | 28.201           | 0.082 | Kuiper et al (2008) | 9.38444            | 0.113 | 0.00165439 | 0.113 | 301.022       | 0.127 | 0.99795266 | 0.041 | 1            | 3.54E-14               | 28  | AUG   | 2021 | 14   | 45  | 1      |
| 21F15940          | 24.0 % | MS-17-DAM | Plagioclase | Unknown  | FCT-NM (4X6-21) | 28.201           | 0.082 | Kuiper et al (2008) | 9.38444            | 0.113 | 0.00165439 | 0.113 | 301.022       | 0.127 | 0.99795266 | 0.041 | 1            | 3.54E-14               | 28  | AUG   | 2021 | 14   | 54  | 1      |
| 21F15942          | 24.0 % | MS-17-DAM | Plagioclase | Unknown  | FCT-NM (4X6-21) | 28.201           | 0.082 | Kuiper et al (2008) | 9.38444            | 0.113 | 0.00165439 | 0.113 | 301.022       | 0.127 | 0.99795266 | 0.041 | 1            | 3.54E-14               | 28  | AUG   | 2021 | 15   | 11  | 1      |
| 21F15943          | 24.0 % | MS-17-DAM | Plagioclase | Unknown  | FCT-NM (4X6-21) | 28.201           | 0.082 | Kuiper et al (2008) | 9.38444            | 0.113 | 0.00165439 | 0.113 | 301.022       | 0.127 | 0.99795266 | 0.041 | 1            | 3.54E-14               | 28  | AUG   | 2021 | 15   | 20  | 1      |
| 21F15945          | 24.0 % | MS-17-DAM | Plagioclase | Unknown  | FCT-NM (4X6-21) | 28.201           | 0.082 | Kuiper et al (2008) | 9.38444            | 0.113 | 0.00165439 | 0.113 | 301.022       | 0.127 | 0.99795266 | 0.041 | 1            | 3.54E-14               | 28  | AUG   | 2021 | 15   | 37  | 1      |
| 21F15946          | 24.0 % | MS-17-DAM | Plagioclase | Unknown  | FCT-NM (4X6-21) | 28.201           | 0.082 | Kuiper et al (2008) | 9.38444            | 0.113 | 0.00165439 | 0.113 | 301.022       | 0.127 | 0.99795266 | 0.041 | 1            | 3.54E-14               | 28  | AUG   | 2021 | 15   | 45  | 1      |
| 21F15948          | 24.0 % | MS-17-DAM | Plagioclase | Unknown  | FCT-NM (4X6-21) | 28.201           | 0.082 | Kuiper et al (2008) | 9.38444            | 0.113 | 0.00165439 | 0.113 | 301.022       | 0.127 | 0.99795266 | 0.041 | 1            | 3.54E-14               | 28  | AUG   | 2021 | 16   | 3   | 1      |
| 21F15949          | 24.0 % | MS-17-DAM | Plagioclase | Unknown  | FCT-NM (4X6-21) | 28.201           | 0.082 | Kuiper et al (2008) | 9.38444            | 0.113 | 0.00165439 | 0.113 | 301.022       | 0.127 | 0.99795266 | 0.041 | 1            | 3.54E-14               | 28  | AUG   | 2021 | 16   | 11  | 1      |
| 21F15951          | 24.0 % | MS-17-DAM | Plagioclase | Unknown  | FCT-NM (4X6-21) | 28.201           | 0.082 | Kuiper et al (2008) | 9.38444            | 0.113 | 0.00165439 | 0.113 | 301.022       | 0.127 | 0.99795266 | 0.041 | 1            | 3.54E-14               | 28  | AUG   | 2021 | 16   | 29  | 1      |
| 21F15952          | 24.0 % | MS-17-DAM | Plagioclase | Unknown  | FCT-NM (4X6-21) | 28.201           | 0.082 | Kuiper et al (2008) | 9.38444            | 0.113 | 0.00165439 | 0.113 | 301.022       | 0.127 | 0.99795266 | 0.041 | 1            | 3.54E-14               | 28  | AUG   | 2021 | 16   | 37  | 1      |
| 21F15954          | 24.0 % | MS-17-DAM | Plagioclase | Unknown  | FCT-NM (4X6-21) | 28.201           | 0.082 | Kuiper et al (2008) | 9.38444            | 0.113 | 0.00165439 | 0.113 | 301.022       | 0.127 | 0.99795266 | 0.041 | 1            | 3.54E-14               | 28  | AUG   | 2021 | 16   | 55  | 1      |
| 21F15955          | 24.0 % | MS-17-DAM | Plagioclase | Unknown  | FCT-NM (4X6-21) | 28.201           | 0.082 | Kuiper et al (2008) | 9.38444            | 0.113 | 0.00165439 | 0.113 | 301.022       | 0.127 | 0.99795266 | 0.041 | 1            | 3.54E-14               | 28  | AUG   | 2021 | 17   | 3   | 1      |
| 21F15957          | 24.0 % | MS-17-DAM | Plagioclase | Unknown  | FCT-NM (4X6-21) | 28.201           | 0.082 | Kuiper et al (2008) | 9.38444            | 0.113 | 0.00165439 | 0.113 | 301.022       | 0.127 | 0.99795266 | 0.041 | 1            | 3.54E-14               | 28  | AUG   | 2021 | 17   | 20  | 1      |
| 21F15958          | 24.0 % | MS-17-DAM | Plagioclase | Unknown  | FCT-NM (4X6-21) | 28.201           | 0.082 | Kuiper et al (2008) | 9.38444            | 0.113 | 0.00165439 | 0.113 | 301.022       | 0.127 | 0.99795266 | 0.041 | 1            | 3.54E-14               | 28  | AUG   | 2021 | 17   | 29  | 1      |
| 21F15960          | 24.0 % | MS-17-DAM | Plagioclase | Unknown  | FCT-NM (4X6-21) | 28.201           | 0.082 | Kuiper et al (2008) | 9.38444            | 0.113 | 0.00165439 | 0.113 | 301.022       | 0.127 | 0.99795266 | 0.041 | 1            | 3.54E-14               | 28  | AUG   | 2021 | 17   | 46  | 1      |
| 21F15961          | 24.0 % | MS-17-DAM | Plagioclase | Unknown  | FCT-NM (4X6-21) | 28.201           | 0.082 | Kuiper et al (2008) | 9.38444            | 0.113 | 0.00165439 | 0.113 | 301.022       | 0.127 | 0.99795266 | 0.041 | 1            | 3.54E-14               | 28  | AUG   | 2021 | 17   | 55  | 1      |
| 21F15963          | 24.0 % | MS-17-DAM | Plagioclase | Unknown  | FCT-NM (4X6-21) | 28.201           | 0.082 | Kuiper et al (2008) | 9.38444            | 0.113 | 0.00165439 | 0.113 | 301.022       | 0.127 | 0.99795266 | 0.041 | 1            | 3.54E-14               | 28  | AUG   | 2021 | 18   | 12  | 1      |
| 21F15964          | 24.0 % | MS-17-DAM | Plagioclase | Unknown  | FCT-NM (4X6-21) | 28.201           | 0.082 | Kuiper et al (2008) | 9.38444            | 0.113 | 0.00165439 | 0.113 | 301.022       | 0.127 | 0.99795266 | 0.041 | 1            | 3.54E-14               | 28  | AUG   | 2021 | 18   | 21  | 1      |
| 21F15966          | 24.0 % | MS-17-DAM | Plagioclase | Unknown  | FCT-NM (4X6-21) | 28.201           | 0.082 | Kuiper et al (2008) | 9.38444            | 0.113 | 0.00165439 | 0.113 | 301.022       | 0.127 | 0.99795266 | 0.041 | 1            | 3.54E-14               | 28  | AUG   | 2021 | 18   | 38  | 1      |
| 21F15967          | 24.0 % | MS-17-DAM | Plagioclase | Unknown  | FCT-NM (4X6-21) | 28.201           | 0.082 | Kuiper et al (2008) | 9.38444            | 0.113 | 0.00165439 | 0.113 | 301.022       | 0.127 | 0.99795266 | 0.041 | 1            | 3.54E-14               | 28  | AUG   | 2021 | 18   | 47  | 1      |



21F15920.AGE >>> MS-17-DAM >>> OREGON | SWENTON (20-01) PROJECT

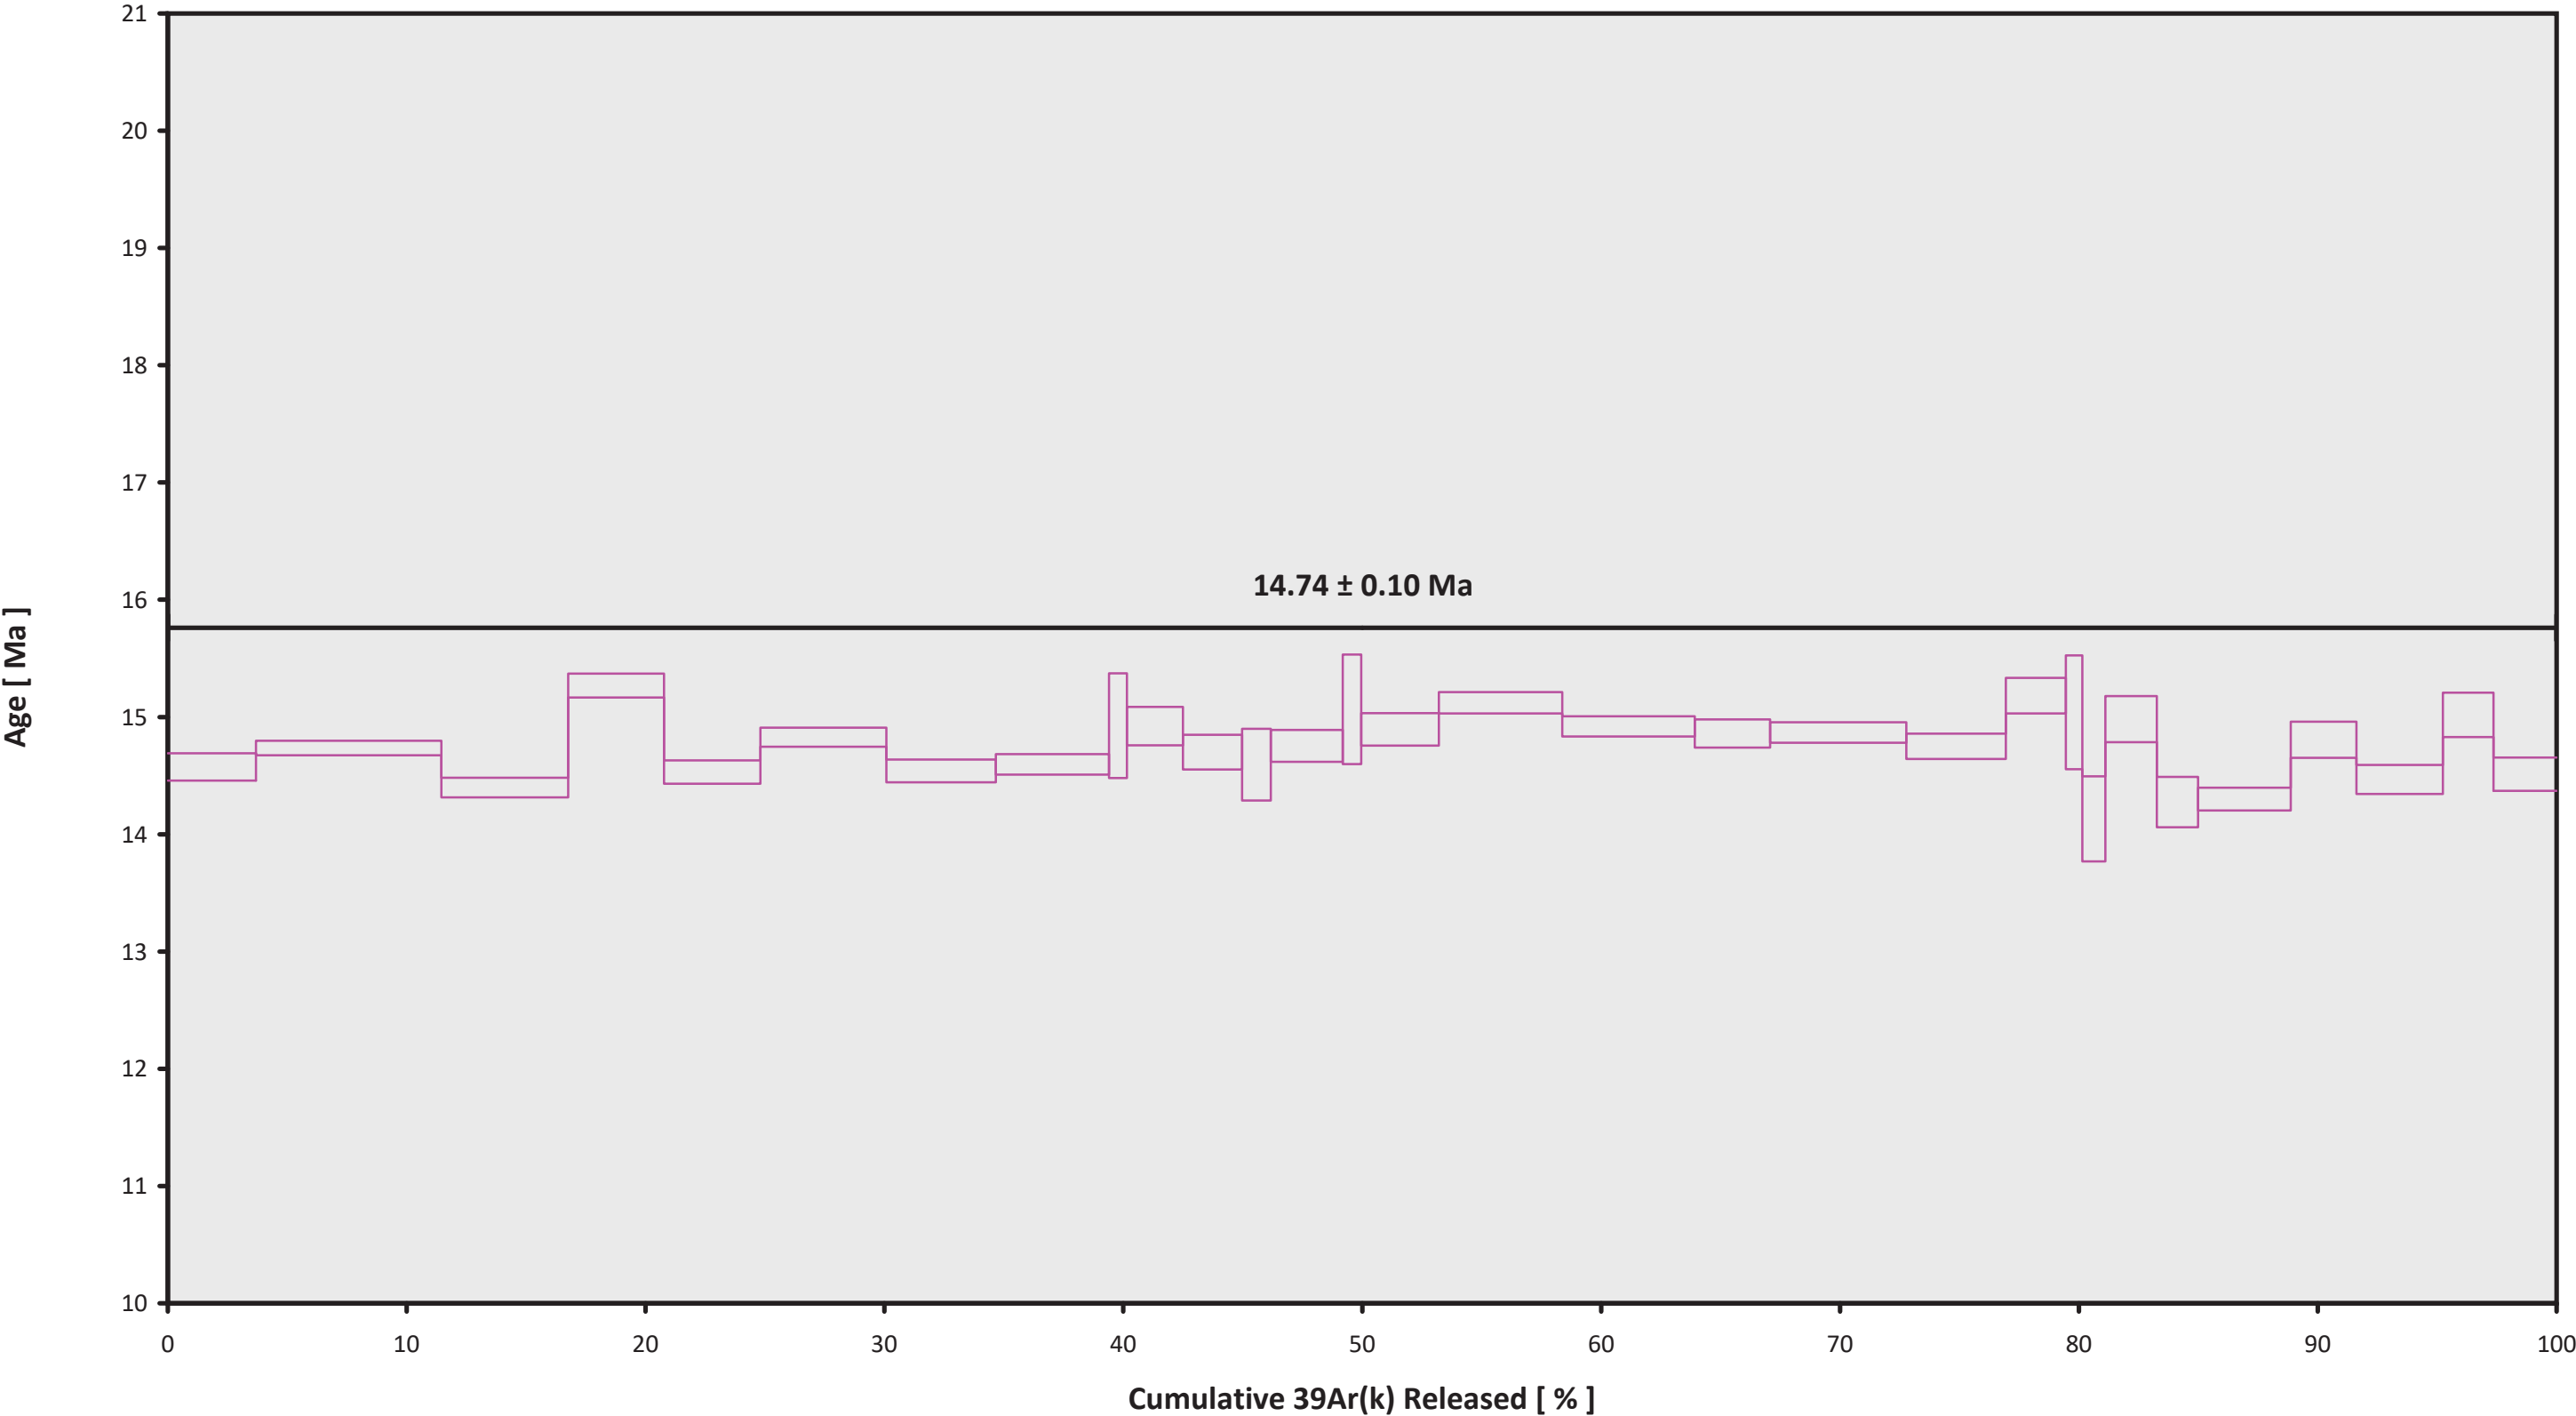

Ar-Ages in Ma

WEIGHTED PLATEAU

14.74 ± 0.10

TOTAL FUSION

14.75 ± 0.04

NORMAL ISOCHRON

14.64 ± 0.20

INVERSE ISOCHRON

14.61 ± 0.21

MSWD (PROBABILITY)

18.53 (0%)

ASSUMED TRAPPED  $^{40}\text{Ar}/^{36}\text{Ar}$  RATIO

Standard  $^{40}\text{Ar}/^{36}\text{Ar}$  =  $298.56 \pm 0.104$  %SD

Sample Info

Plagioclase

Unknown

Dan Miggins

IRR = 21-OSU-04 (4X6-21)

J =  $0.00165439 \pm 0.00000187$



21F15920.AGE >>> MS-17-DAM >>> OREGON | SWENTON (20-01) PROJECT

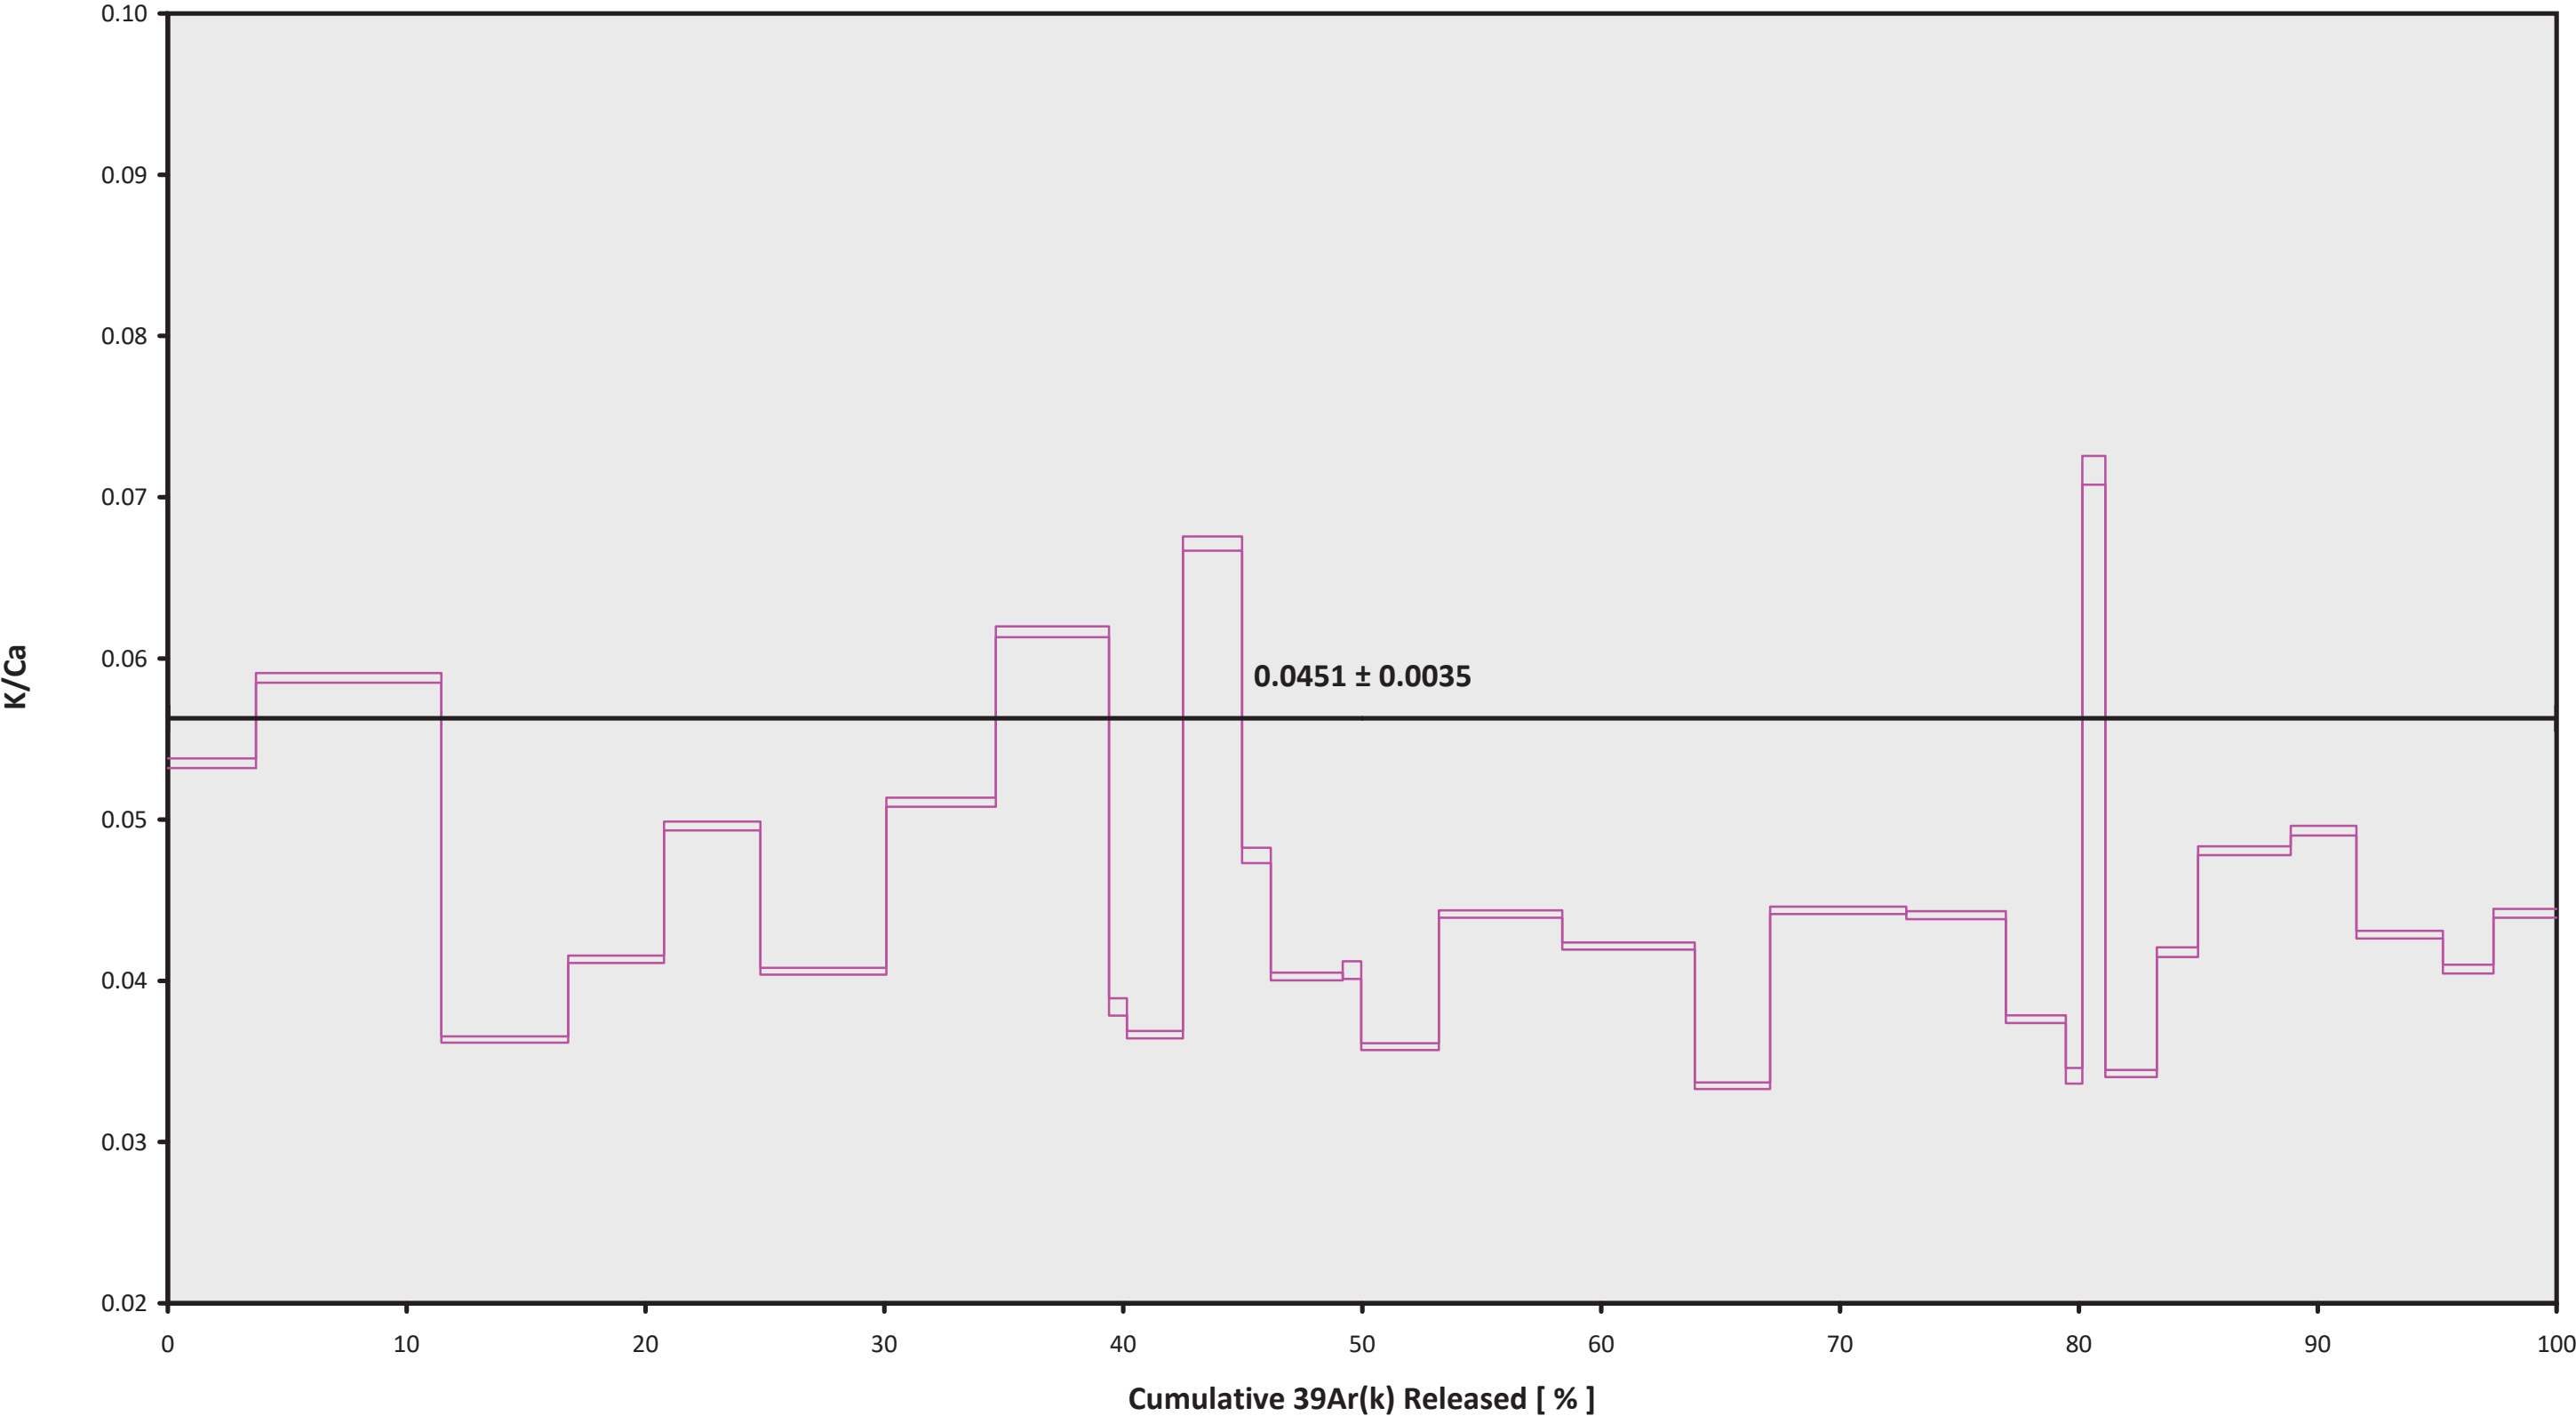

Ar-Ages in Ma

WEIGHTED PLATEAU

$14.74 \pm 0.10$

TOTAL FUSION

$14.75 \pm 0.04$

NORMAL ISOCHRON

$14.64 \pm 0.20$

INVERSE ISOCHRON

$14.61 \pm 0.21$

ASSUMED TRAPPED  $^{40}\text{Ar}/^{36}\text{Ar}$  RATIO

Standard  $^{40}\text{Ar}/^{36}\text{Ar} = 298.56 \pm 0.104$  %SD

Sample Info

Plagioclase

Unknown

Dan Miggins

IRR = 21-OSU-04 (4X6-21)

J =  $0.00165439 \pm 0.00000187$



21F15920.AGE >>> MS-17-DAM >>> OREGON | SWENTON (20-01) PROJECT

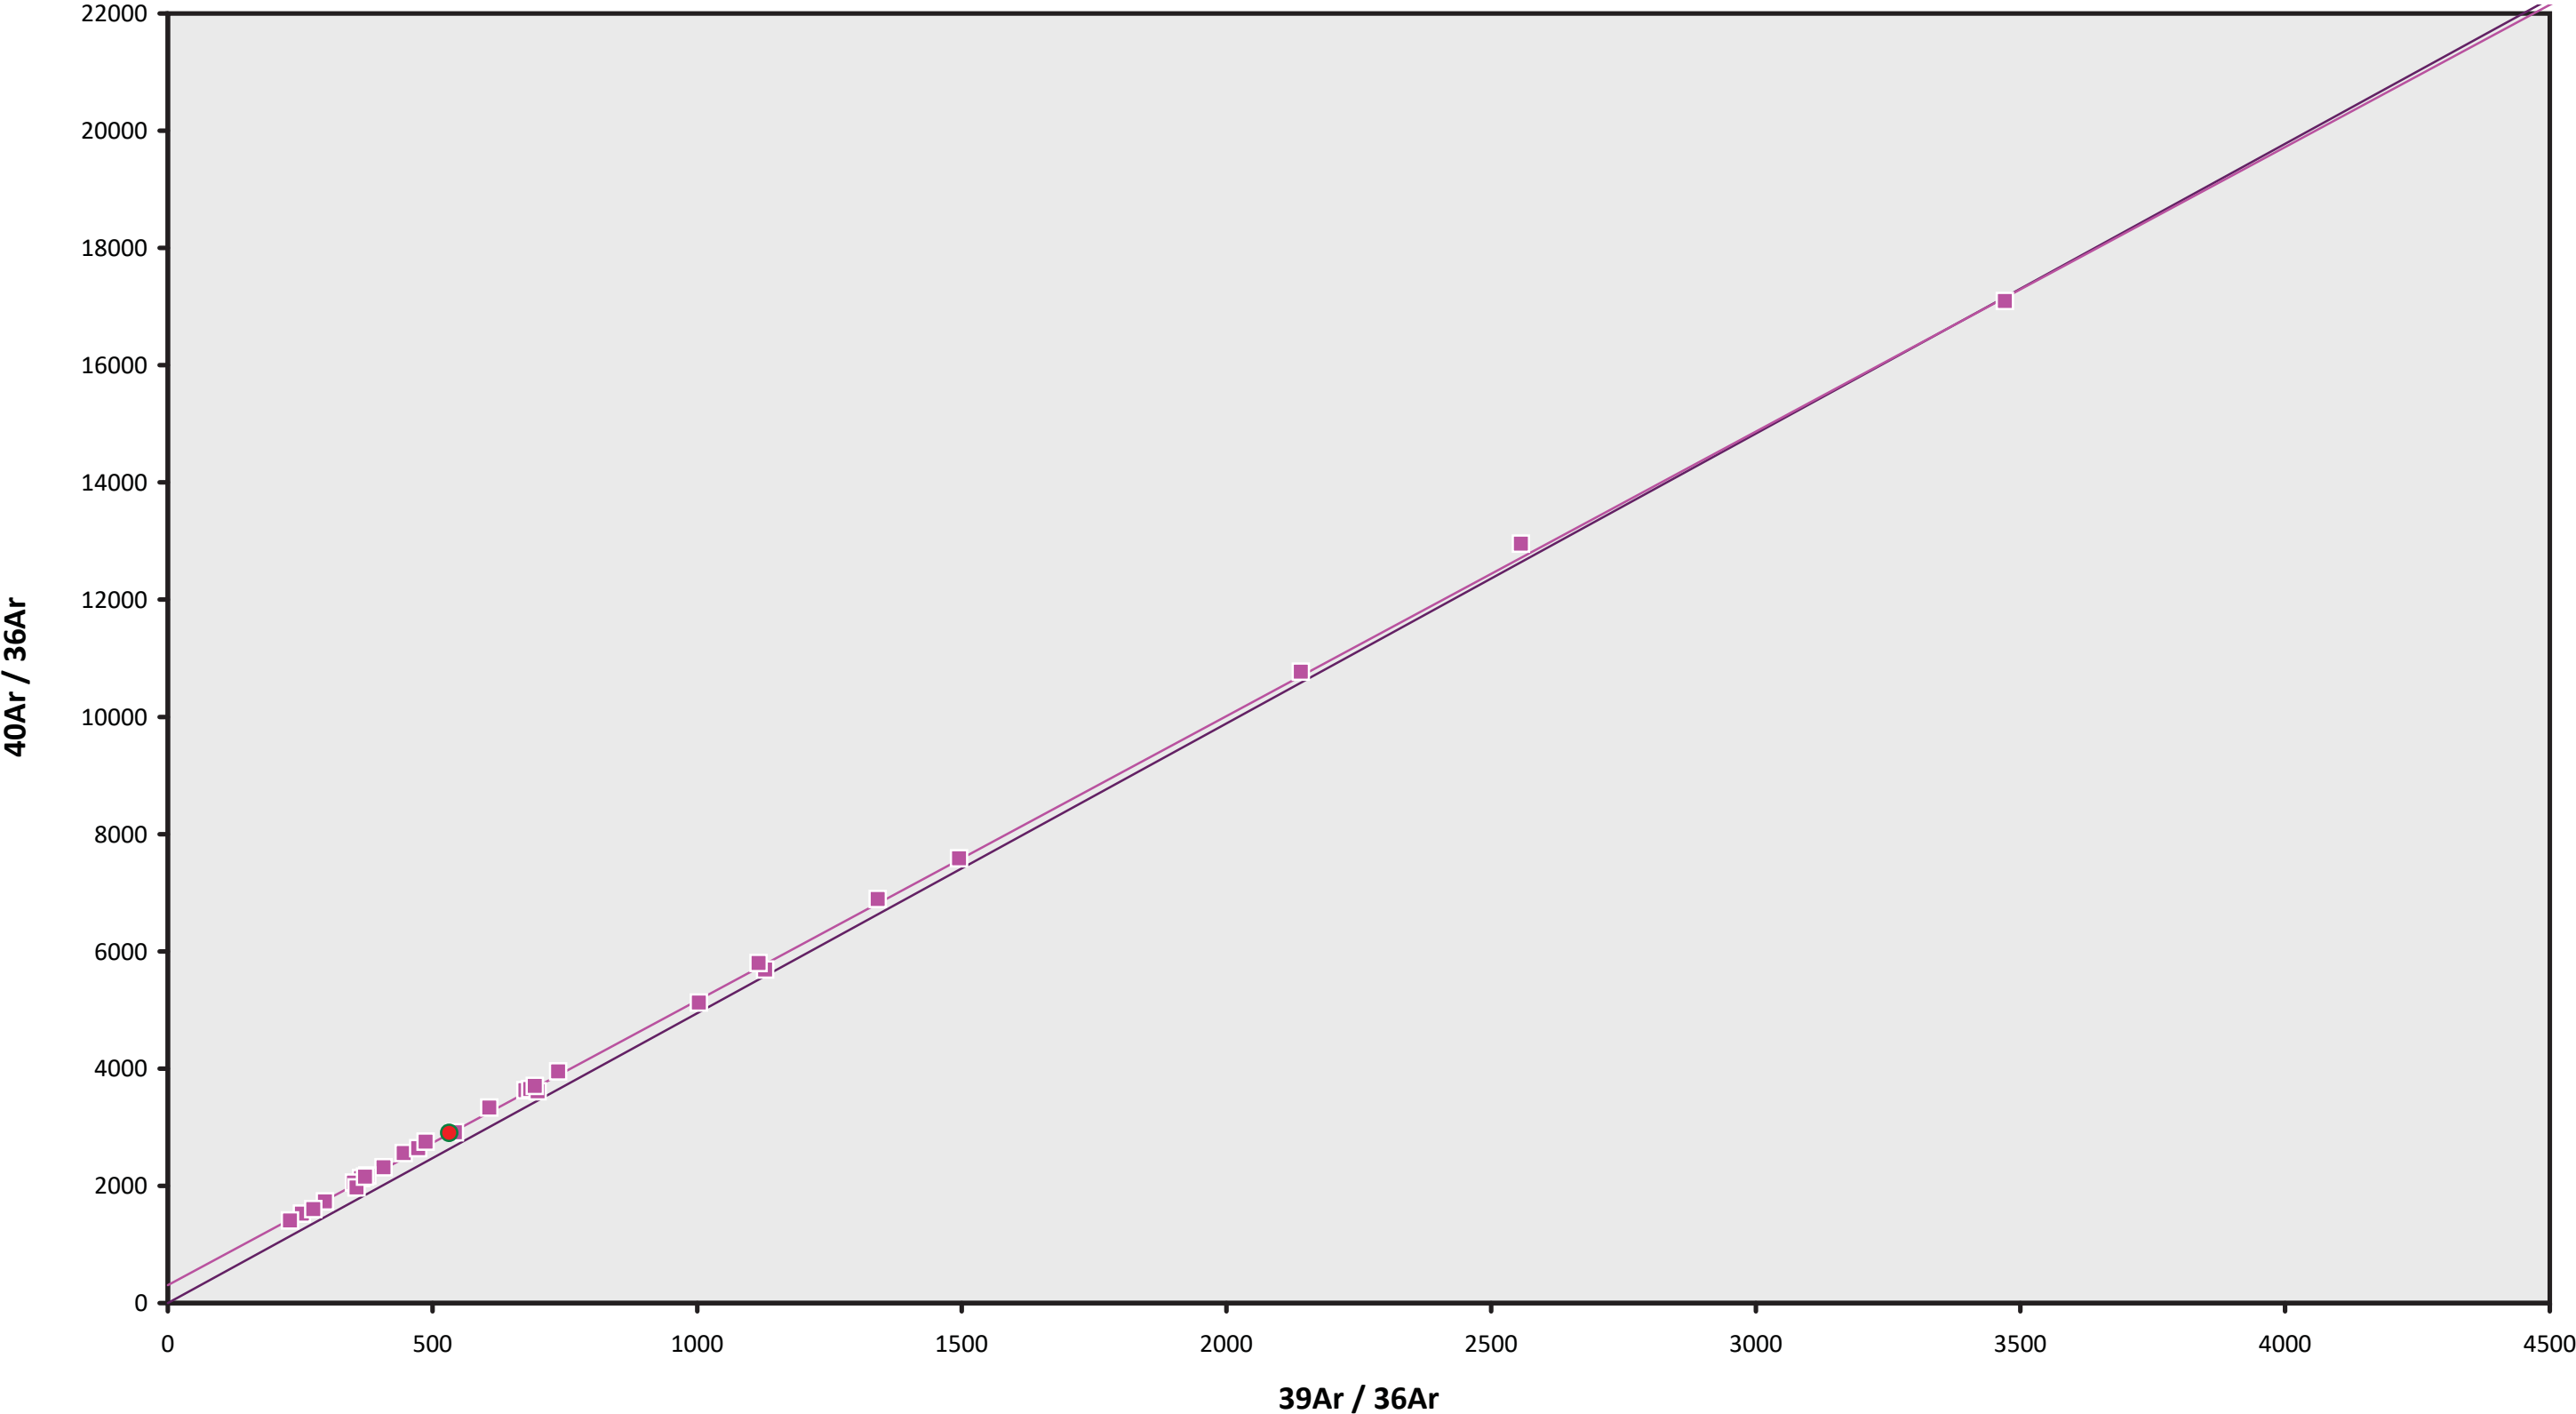

Ar-Ages in Ma

WEIGHTED PLATEAU

$14.74 \pm 0.10$

TOTAL FUSION

$14.75 \pm 0.04$

NORMAL ISOCHRON

$14.64 \pm 0.20$

INVERSE ISOCHRON

$14.61 \pm 0.21$

MSWD (PROBABILITY)

18.87 (0%)

CALCULATED  $40\text{Ar}/36\text{Ar}$  INTERCEPT

$304.2 \pm 32.5$

Sample Info

Plagioclase

Unknown

Dan Miggins

IRR = 21-OSU-04 (4X6-21)

$J = 0.00165439 \pm 0.00000187$

21F15920.AGE >>> MS-17-DAM >>> OREGON | SWENTON (20-01) PROJECT

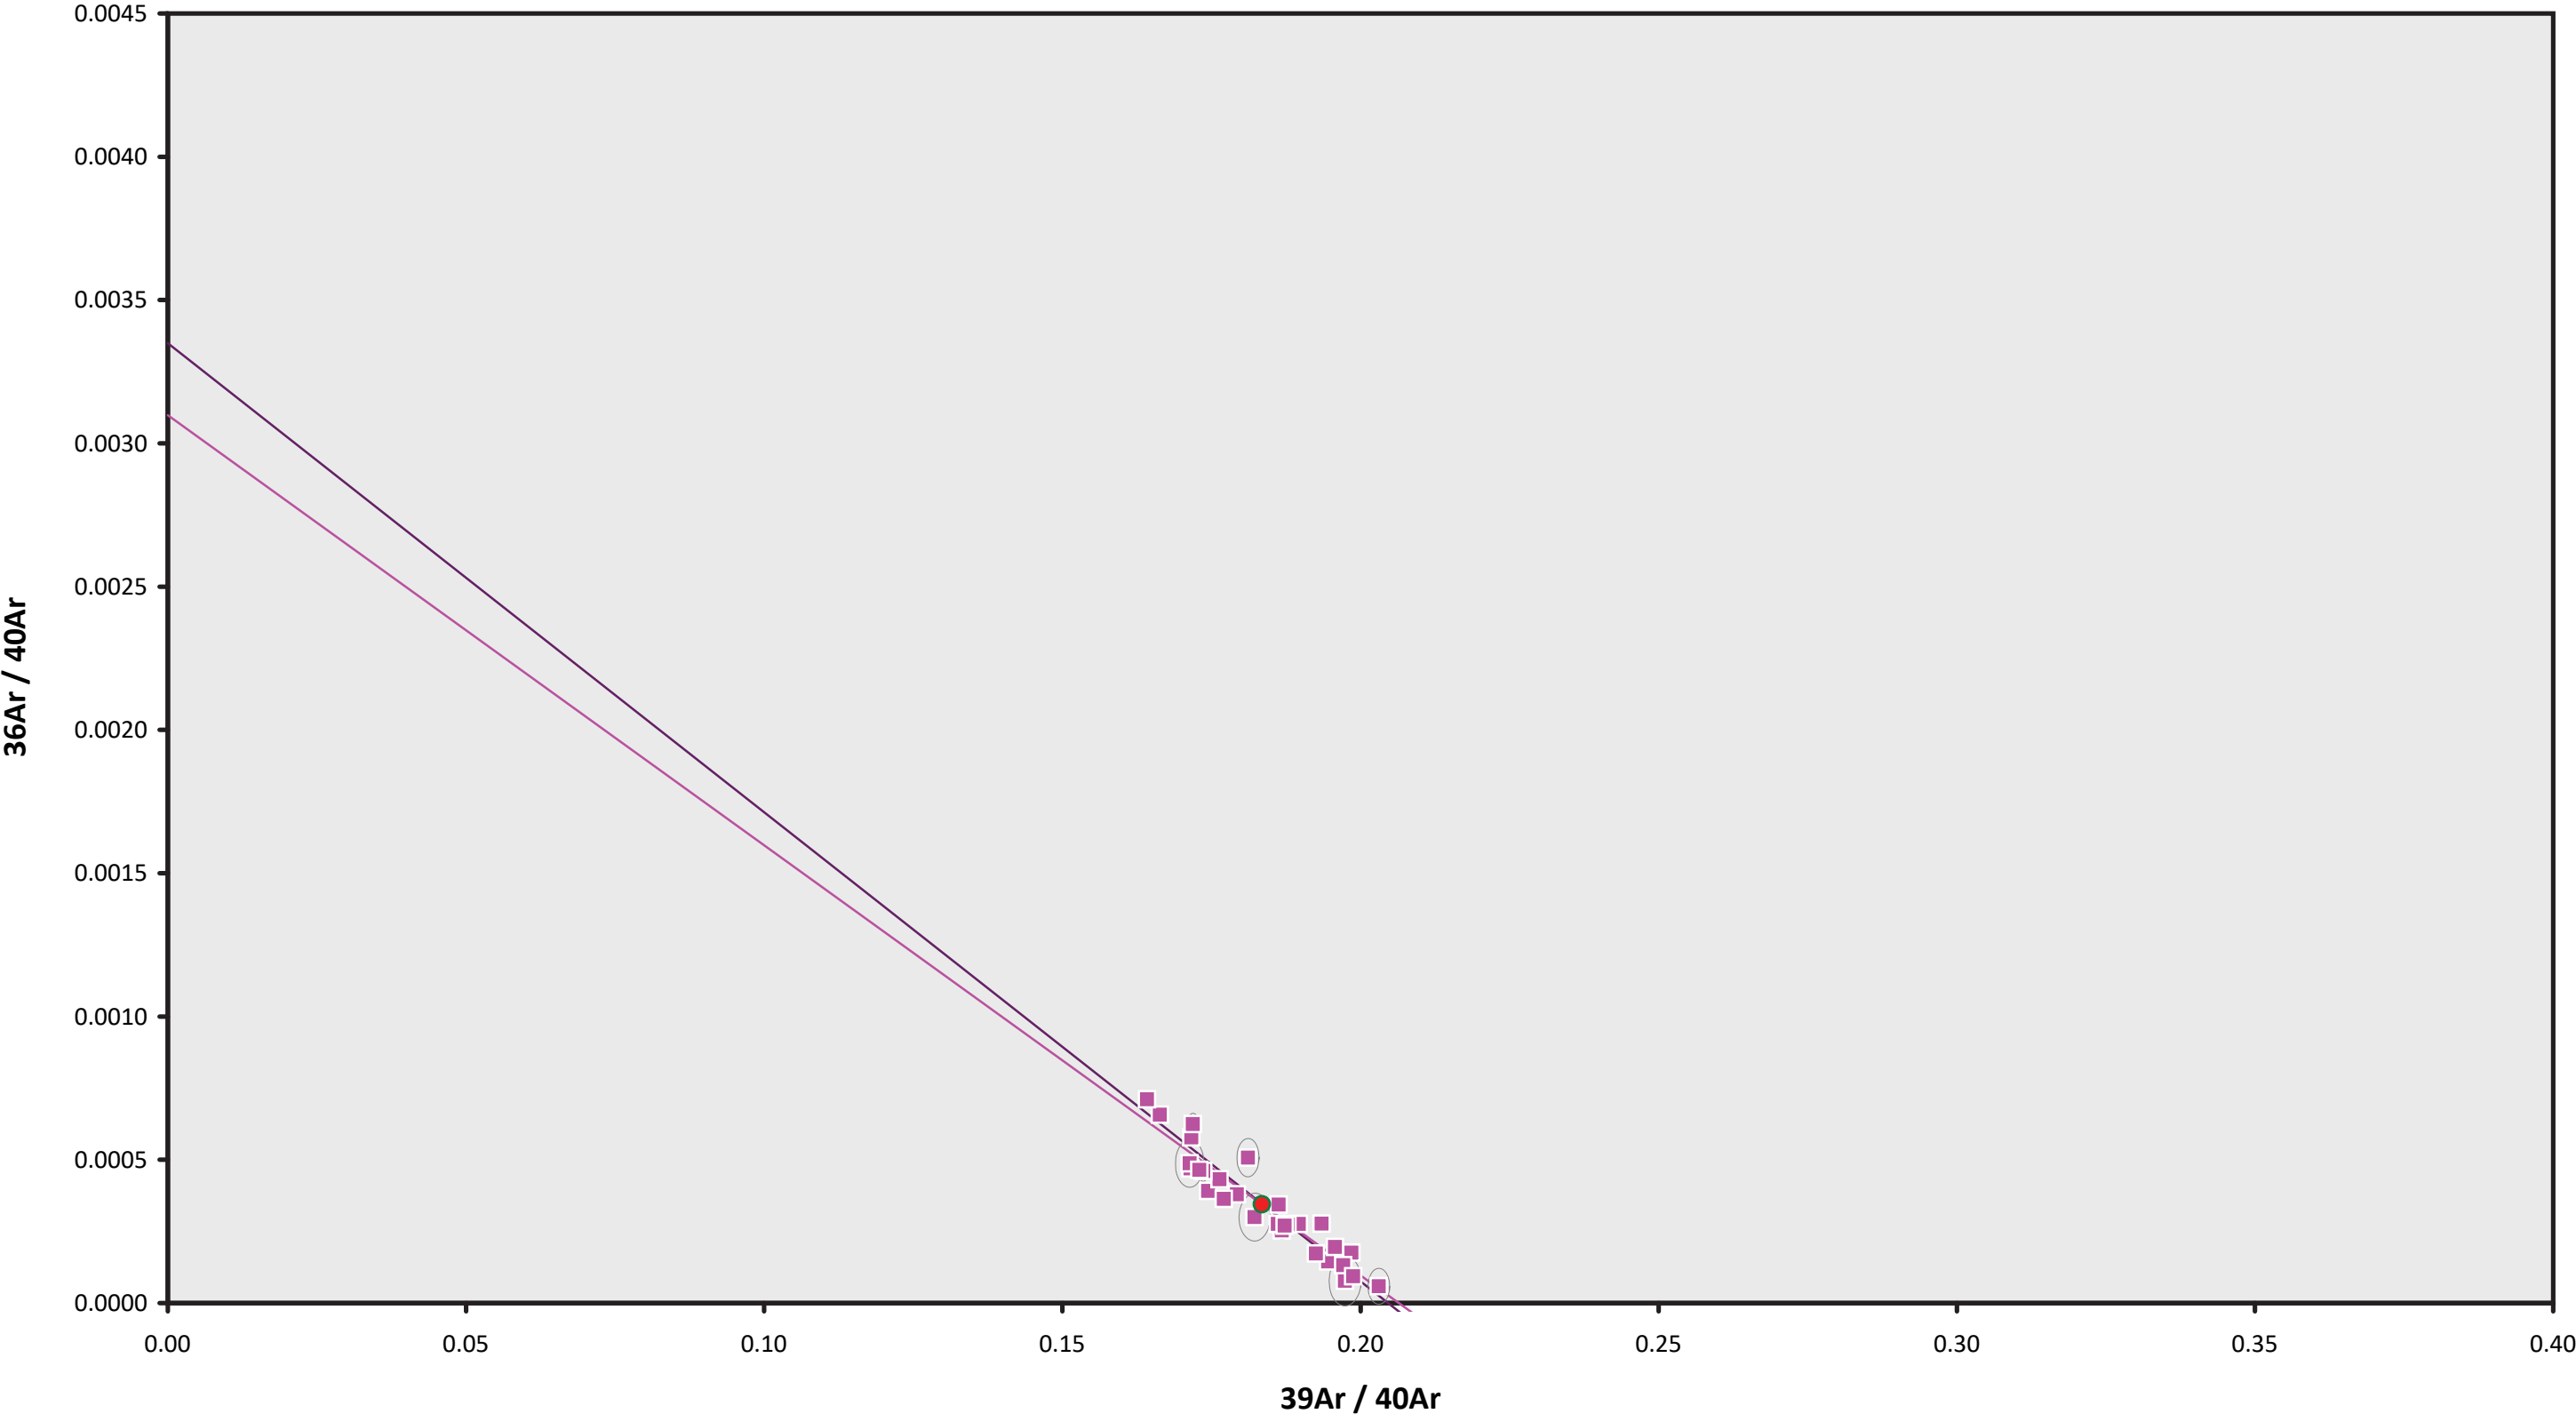

Ar-Ages in Ma

WEIGHTED PLATEAU

14.74 ± 0.10

TOTAL FUSION

14.75 ± 0.04

NORMAL ISOCHRON

14.64 ± 0.20

INVERSE ISOCHRON

14.61 ± 0.21

MSWD (PROBABILITY)

17.85 (0%)

SPREADING FACTOR

18.8%

CALCULATED 40AR/36AR INTERCEPT

322.7 ± 34.9

Sample Info

Plagioclase

Unknown

Dan Miggins

IRR = 21-OSU-04 (4X6-21)

J = 0.00165439 ± 0.00000187

| Relative Abundances |        |   | 36Ar<br>[fA] | %1σ   | 37Ar<br>[fA] | %1σ    | 38Ar<br>[fA] | %1σ   | 39Ar<br>[fA] | %1σ   | 40Ar<br>[fA] | %1σ   | 40(r)/39(k) ± 2σ | Age ± 2σ<br>(Ma) | 40Ar(r)<br>(%) | 39Ar(k)<br>(%) | K/Ca ± 2σ |
|---------------------|--------|---|--------------|-------|--------------|--------|--------------|-------|--------------|-------|--------------|-------|------------------|------------------|----------------|----------------|-----------|
| 20F24286            | 17.0 % | ✓ | 0.0230199    | 1.626 | 1.462794     | 9.709  | 1.461404     | 0.604 | 120.9127     | 0.044 | 432.265      | 0.007 | 3.51857 ±0.00367 | 10.62 ±0.01      | 98.42          | 1.59           | 35.5 ±6.9 |
| 20F24287            | 17.0 % | ✓ | 0.0277737    | 1.358 | 1.495212     | 9.206  | 1.357217     | 0.640 | 112.0671     | 0.045 | 403.034      | 0.009 | 3.52287 ±0.00379 | 10.63 ±0.01      | 97.96          | 1.47           | 32.2 ±5.9 |
| 20F24289            | 17.0 % | ✓ | 0.0185476    | 1.863 | 1.553220     | 8.781  | 1.639902     | 0.599 | 137.3038     | 0.044 | 490.114      | 0.007 | 3.52956 ±0.00349 | 10.65 ±0.01      | 98.88          | 1.80           | 38.0 ±6.7 |
| 20F24290            | 17.0 % | ✓ | 0.0050839    | 5.583 | 1.408857     | 10.426 | 1.384101     | 0.740 | 116.5006     | 0.044 | 411.488      | 0.008 | 3.51943 ±0.00350 | 10.62 ±0.01      | 99.64          | 1.53           | 35.6 ±7.4 |
| 20F24292            | 17.0 % | ✓ | 0.2326881    | 0.393 | 4.981026     | 2.764  | 4.707401     | 0.218 | 388.0984     | 0.043 | 1438.484     | 0.004 | 3.52795 ±0.00336 | 10.65 ±0.01      | 95.18          | 5.09           | 33.5 ±1.9 |
| 20F24293            | 17.0 % | ✓ | 0.0268332    | 1.511 | 2.341853     | 5.503  | 2.291372     | 0.403 | 191.5683     | 0.043 | 683.397      | 0.006 | 3.52597 ±0.00335 | 10.64 ±0.01      | 98.84          | 2.51           | 35.2 ±3.9 |
| 20F24295            | 17.0 % | ✓ | 0.0409183    | 1.170 | 4.538481     | 3.089  | 4.316415     | 0.234 | 360.5545     | 0.043 | 1283.418     | 0.004 | 3.52612 ±0.00314 | 10.64 ±0.01      | 99.06          | 4.73           | 34.2 ±2.1 |
| 20F24296            | 17.0 % | ✓ | 0.0697821    | 0.774 | 5.845746     | 2.368  | 5.551346     | 0.193 | 461.6372     | 0.043 | 1649.104     | 0.003 | 3.52761 ±0.00310 | 10.65 ±0.01      | 98.75          | 6.06           | 34.0 ±1.6 |
| 20F24298            | 17.0 % | ✓ | 0.2770930    | 0.356 | 2.296558     | 6.371  | 1.837425     | 0.530 | 148.3955     | 0.044 | 605.777      | 0.007 | 3.52536 ±0.00520 | 10.64 ±0.02      | 86.36          | 1.95           | 27.8 ±3.5 |
| 20F24299            | 17.0 % | ✓ | 0.0930120    | 0.642 | 2.814862     | 4.942  | 2.405226     | 0.396 | 201.2519     | 0.043 | 736.605      | 0.005 | 3.52268 ±0.00356 | 10.63 ±0.01      | 96.24          | 2.64           | 30.7 ±3.0 |
| 20F24301            | 17.0 % | ✓ | 0.0371750    | 1.170 | 3.279652     | 4.099  | 3.313231     | 0.307 | 274.6696     | 0.043 | 978.465      | 0.005 | 3.52231 ±0.00318 | 10.63 ±0.01      | 98.88          | 3.60           | 36.0 ±3.0 |
| 20F24302            | 17.0 % | ✓ | 0.0175036    | 2.313 | 5.609185     | 2.573  | 5.664793     | 0.202 | 473.3489     | 0.043 | 1674.156     | 0.003 | 3.52617 ±0.00306 | 10.64 ±0.01      | 99.70          | 6.21           | 36.3 ±1.9 |
| 20F24304            | 17.0 % | ✓ | 0.0451334    | 0.987 | 3.538153     | 3.838  | 3.815411     | 0.254 | 318.8521     | 0.043 | 1136.740     | 0.005 | 3.52315 ±0.00316 | 10.63 ±0.01      | 98.82          | 4.18           | 38.8 ±3.0 |
| 20F24305            | 17.0 % | ✓ | 0.0694340    | 0.806 | 4.409396     | 3.186  | 3.873157     | 0.265 | 322.4940     | 0.043 | 1157.011     | 0.004 | 3.52395 ±0.00321 | 10.64 ±0.01      | 98.22          | 4.23           | 31.4 ±2.0 |
| 20F24307            | 17.0 % | ✓ | 0.0598264    | 0.826 | 2.289311     | 5.841  | 2.108063     | 0.467 | 174.0853     | 0.043 | 631.676      | 0.006 | 3.52642 ±0.00354 | 10.64 ±0.01      | 97.18          | 2.28           | 32.7 ±3.8 |
| 20F24308            | 17.0 % | ✓ | 0.1331305    | 0.471 | 5.647425     | 2.315  | 5.823810     | 0.197 | 483.1660     | 0.043 | 1745.394     | 0.003 | 3.53051 ±0.00312 | 10.66 ±0.01      | 97.73          | 6.34           | 36.8 ±1.7 |
| 20F24310            | 17.0 % | ✓ | 0.2082419    | 0.369 | 3.474462     | 4.031  | 3.155899     | 0.311 | 260.8182     | 0.043 | 981.758      | 0.005 | 3.52627 ±0.00355 | 10.64 ±0.01      | 93.68          | 3.42           | 32.3 ±2.6 |
| 20F24311            | 17.0 % | ✓ | 0.0354853    | 1.143 | 3.067103     | 4.697  | 2.731771     | 0.360 | 228.7048     | 0.043 | 816.544      | 0.006 | 3.52448 ±0.00325 | 10.64 ±0.01      | 98.72          | 3.00           | 32.1 ±3.0 |
| 20F24313            | 17.0 % | ✓ | 0.0297852    | 1.252 | 3.620590     | 3.659  | 3.535666     | 0.296 | 293.5113     | 0.043 | 1042.684     | 0.005 | 3.52257 ±0.00314 | 10.63 ±0.01      | 99.16          | 3.85           | 34.9 ±2.6 |
| 20F24314            | 17.0 % | ✓ | 0.0442960    | 1.057 | 4.479564     | 3.092  | 4.345635     | 0.246 | 362.5498     | 0.043 | 1291.717     | 0.004 | 3.52681 ±0.00313 | 10.65 ±0.01      | 98.99          | 4.76           | 34.8 ±2.2 |
| 20F24316            | 17.0 % | ✓ | 0.0674820    | 0.765 | 2.737584     | 5.166  | 2.582516     | 0.349 | 216.2809     | 0.043 | 782.754      | 0.005 | 3.52644 ±0.00338 | 10.64 ±0.01      | 97.44          | 2.84           | 34.0 ±3.5 |
| 20F24317            | 17.0 % | ✓ | 0.0235122    | 1.603 | 3.273806     | 4.272  | 3.367462     | 0.295 | 280.9889     | 0.043 | 997.666      | 0.005 | 3.52593 ±0.00316 | 10.64 ±0.01      | 99.31          | 3.69           | 36.9 ±3.2 |
| 20F24319            | 17.0 % | ✓ | 0.0207880    | 1.969 | 2.511964     | 5.519  | 2.424481     | 0.399 | 203.4429     | 0.043 | 723.265      | 0.006 | 3.52503 ±0.00330 | 10.64 ±0.01      | 99.15          | 2.67           | 34.8 ±3.8 |
| 20F24320            | 17.0 % | ✓ | 0.0231650    | 1.654 | 2.142778     | 6.326  | 1.990448     | 0.483 | 165.7067     | 0.044 | 590.915      | 0.007 | 3.52476 ±0.00341 | 10.64 ±0.01      | 98.84          | 2.17           | 33.3 ±4.2 |
| 20F24322            | 17.0 % | ✓ | 0.0165458    | 1.953 | 1.879372     | 7.638  | 1.828457     | 0.530 | 151.1237     | 0.044 | 537.479      | 0.007 | 3.52429 ±0.00338 | 10.64 ±0.01      | 99.09          | 1.98           | 34.6 ±5.3 |
| 20F24323            | 17.0 % | ✓ | 0.1570404    | 0.439 | 3.092923     | 4.738  | 2.832529     | 0.331 | 231.9215     | 0.043 | 863.386      | 0.006 | 3.52109 ±0.00357 | 10.63 ±0.01      | 94.58          | 3.04           | 32.2 ±3.1 |
| 20F24325            | 17.0 % | ✓ | 0.0474389    | 0.978 | 3.331854     | 3.963  | 2.836989     | 0.351 | 235.8191     | 0.043 | 843.993      | 0.005 | 3.51949 ±0.00327 | 10.62 ±0.01      | 98.34          | 3.09           | 30.4 ±2.4 |
| 20F24326            | 17.0 % | ✓ | 0.0583778    | 0.913 | 3.781329     | 3.479  | 3.551585     | 0.283 | 295.9358     | 0.043 | 1060.252     | 0.004 | 3.52427 ±0.00325 | 10.64 ±0.01      | 98.37          | 3.88           | 33.7 ±2.3 |
| 20F24328            | 17.0 % | ✓ | 0.0586793    | 0.828 | 2.572170     | 5.246  | 2.431386     | 0.383 | 201.8941     | 0.043 | 728.169      | 0.006 | 3.52036 ±0.00341 | 10.63 ±0.01      | 97.61          | 2.65           | 33.8 ±3.5 |
| 20F24329            | 17.0 % | ✓ | 0.0783620    | 0.620 | 2.953712     | 4.575  | 2.497712     | 0.391 | 207.6999     | 0.043 | 754.599      | 0.006 | 3.52105 ±0.00338 | 10.63 ±0.01      | 96.91          | 2.73           | 30.2 ±2.8 |
| Σ                   |        |   | 2.0461546    | 0.140 | 96.430940    | 0.786  | 91.662813    | 0.059 | 7621.3035    | 0.008 | 27472.308    | 0.001 |                  |                  |                |                |           |

| Information on Analysis and Constants Used in Calculations |  |
|------------------------------------------------------------|--|
| Project = <b>SWENTON (20-01)</b>                           |  |
| Sample = <b>VS17-020</b>                                   |  |
| Material = <b>Sanidine</b>                                 |  |
| Location = <b>Rhyolite Dome</b>                            |  |
| Region = <b>Eastern Oregon</b>                             |  |
| Analyst = <b>Dan Miggins</b>                               |  |
| Irradiation = <b>20-OSU-01 (1D6-20)</b>                    |  |
| Position = <b>X: 0   Y: 0   Z/H: 6.368684 mm</b>           |  |
| FCT-NM Age = <b>28.201 ±0.023 Ma</b>                       |  |
| FCT-NM Reference = <b>Kuiper et al (2008)</b>              |  |
| FCT-NM 40Ar/39Ar Ratio = <b>9.38823 ±0.00676</b>           |  |
| FCT-NMJ-value = <b>0.00165372 ±0.00000119</b>              |  |
| Air Shot 40Ar/36Ar = <b>298.4040 ±0.3969</b>               |  |
| Air Shot MDF = <b>1.00013086 ±0.00042285 (LIN)</b>         |  |
| Experiment Type = <b>Total Fusion</b>                      |  |
| Extraction Method = <b>Single Crystal Laser Heating</b>    |  |
| Heating = <b>62 sec</b>                                    |  |
| Isolation = <b>1.62 min</b>                                |  |
| Instrument = <b>ARGUS-VI-F</b>                             |  |
| Preferred Age = <b>Ideogram Age</b>                        |  |
| Age Classification = <b>Eruption Age</b>                   |  |
| IGSN = <b>Undefined</b>                                    |  |
| Rock Class = <b>Undefined</b>                              |  |
| Lithology = <b>Undefined</b>                               |  |
| Lat-Lon = <b>Undefined - Undefined</b>                     |  |

| Results                         | 40(a)/36(a) ± 2σ    | 40(r)/39(k) ± 2σ        | Age ± 2σ<br>(Ma)                                    | M\$WD          | 39Ar(k)<br>(%,n)                           | K/Ca ± 2σ |
|---------------------------------|---------------------|-------------------------|-----------------------------------------------------|----------------|--------------------------------------------|-----------|
| Age Plateau<br>Error Mean       |                     | 3.52448 ±0.00107 ±0.03% | 10.64 ±0.02 ±0.15%                                  | 3.08 0%        | 100.00 30                                  | 33.9 ±0.8 |
|                                 |                     |                         | Full External Error ±0.55<br>Analytical Error ±0.00 | 1.53 1.7538    | 2σ Confidence Limit<br>Error Magnification |           |
| Total Fusion Age                |                     | 3.52496 ±0.00064 ±0.02% | 10.64 ±0.02 ±0.14%                                  |                | 30                                         | 34.0 ±0.5 |
|                                 |                     |                         | Full External Error ±0.55<br>Analytical Error ±0.00 |                |                                            |           |
| Normal Isochron<br>Error Chron  | 300.15 ±4.20 ±1.40% | 3.52372 ±0.00153 ±0.04% | 10.64 ±0.02 ±0.15%                                  | 3.30 0%        | 100.00 30                                  |           |
|                                 |                     |                         | Full External Error ±0.55<br>Analytical Error ±0.00 | 1.53 1.8153    | 2σ Confidence Limit<br>Error Magnification |           |
|                                 |                     |                         |                                                     | 1 0.0000003150 | Number of Iterations<br>Convergence        |           |
| Inverse Isochron<br>Error Chron | 299.00 ±4.13 ±1.38% | 3.52437 ±0.00150 ±0.04% | 10.64 ±0.02 ±0.15%                                  | 3.19 0%        | 100.00 30                                  |           |
|                                 |                     |                         | Full External Error ±0.55<br>Analytical Error ±0.00 | 1.53 1.7859    | 2σ Confidence Limit<br>Error Magnification |           |
|                                 |                     |                         |                                                     | 2 0.0000251317 | Number of Iterations<br>Convergence        |           |
|                                 |                     |                         |                                                     | 13%            | Spreading Factor                           |           |

| Incremental Heating |        |   | 36Ar(a)<br>[fA] | 37Ar(ca)<br>[fA] | 38Ar(cl)<br>[fA] | 39Ar(k)<br>[fA] | 40Ar(r)<br>[fA] | Age ± 2σ<br>(Ma) | 40Ar(r)<br>(%) | 39Ar(k)<br>(%) | K/Ca ± 2σ |
|---------------------|--------|---|-----------------|------------------|------------------|-----------------|-----------------|------------------|----------------|----------------|-----------|
| 20F24286            | 17.0 % | ✓ | 0.0226245       | 1.462794         | 0.0000000        | 120.9118        | 425.437         | 10.62 ±0.01      | 98.42          | 1.59           | 35.5 ±6.9 |
| 20F24287            | 17.0 % | ✓ | 0.0273696       | 1.495212         | 0.0000000        | 112.0662        | 394.795         | 10.63 ±0.01      | 97.96          | 1.47           | 32.2 ±5.9 |
| 20F24289            | 17.0 % | ✓ | 0.0181278       | 1.553220         | 0.0000000        | 137.3028        | 484.618         | 10.65 ±0.01      | 98.88          | 1.80           | 38.0 ±6.7 |
| 20F24290            | 17.0 % | ✓ | 0.0047031       | 1.408857         | 0.0000000        | 116.4997        | 410.013         | 10.62 ±0.01      | 99.64          | 1.53           | 35.6 ±7.4 |
| 20F24292            | 17.0 % | ✓ | 0.2313417       | 4.981026         | 0.0000000        | 388.0952        | 1369.179        | 10.65 ±0.01      | 95.18          | 5.09           | 33.5 ±1.9 |
| 20F24293            | 17.0 % | ✓ | 0.0262002       | 2.341853         | 0.0000000        | 191.5668        | 675.459         | 10.64 ±0.01      | 98.84          | 2.51           | 35.2 ±3.9 |
| 20F24295            | 17.0 % | ✓ | 0.0396915       | 4.538481         | 0.0000000        | 360.5516        | 1271.349        | 10.64 ±0.01      | 99.06          | 4.73           | 34.2 ±2.1 |
| 20F24296            | 17.0 % | ✓ | 0.0682020       | 5.845746         | 0.0000000        | 461.6334        | 1628.461        | 10.65 ±0.01      | 98.75          | 6.06           | 34.0 ±1.6 |
| 20F24298            | 17.0 % | ✓ | 0.2764723       | 2.296558         | 0.0000000        | 148.3941        | 523.143         | 10.64 ±0.02      | 86.36          | 1.95           | 27.8 ±3.5 |
| 20F24299            | 17.0 % | ✓ | 0.0922512       | 2.814862         | 0.0000000        | 201.2501        | 708.940         | 10.63 ±0.01      | 96.24          | 2.64           | 30.7 ±3.0 |
| 20F24301            | 17.0 % | ✓ | 0.0362885       | 3.279652         | 0.0000000        | 274.6675        | 967.463         | 10.63 ±0.01      | 98.88          | 3.60           | 36.0 ±3.0 |
| 20F24302            | 17.0 % | ✓ | 0.0159874       | 5.609185         | 0.0000000        | 473.3453        | 1669.096        | 10.64 ±0.01      | 99.70          | 6.21           | 36.3 ±1.9 |
| 20F24304            | 17.0 % | ✓ | 0.0441771       | 3.538153         | 0.0000000        | 318.8498        | 1123.357        | 10.63 ±0.01      | 98.82          | 4.18           | 38.8 ±3.0 |
| 20F24305            | 17.0 % | ✓ | 0.0682421       | 4.409396         | 0.0000000        | 322.4912        | 1136.441        | 10.64 ±0.01      | 98.22          | 4.23           | 31.4 ±2.0 |
| 20F24307            | 17.0 % | ✓ | 0.0592076       | 2.289311         | 0.0000000        | 174.0838        | 613.893         | 10.64 ±0.01      | 97.18          | 2.28           | 32.7 ±3.8 |
| 20F24308            | 17.0 % | ✓ | 0.1316040       | 5.647425         | 0.0000000        | 483.1624        | 1705.809        | 10.66 ±0.01      | 97.73          | 6.34           | 36.8 ±1.7 |
| 20F24310            | 17.0 % | ✓ | 0.2073028       | 3.474462         | 0.0000000        | 260.8160        | 919.708         | 10.64 ±0.01      | 93.68          | 3.42           | 32.3 ±2.6 |
| 20F24311            | 17.0 % | ✓ | 0.0346562       | 3.067103         | 0.0000000        | 228.7028        | 806.058         | 10.64 ±0.01      | 98.72          | 3.00           | 32.1 ±3.0 |
| 20F24313            | 17.0 % | ✓ | 0.0288066       | 3.620590         | 0.0000000        | 293.5090        | 1033.906        | 10.63 ±0.01      | 99.16          | 3.85           | 34.9 ±2.6 |
| 20F24314            | 17.0 % | ✓ | 0.0430852       | 4.479564         | 0.0000000        | 362.5469        | 1278.633        | 10.65 ±0.01      | 98.99          | 4.76           | 34.8 ±2.2 |
| 20F24316            | 17.0 % | ✓ | 0.0667420       | 2.737584         | 0.0000000        | 216.2792        | 762.696         | 10.64 ±0.01      | 97.44          | 2.84           | 34.0 ±3.5 |
| 20F24317            | 17.0 % | ✓ | 0.0226273       | 3.273806         | 0.0000000        | 280.9868        | 990.740         | 10.64 ±0.01      | 99.31          | 3.69           | 36.9 ±3.2 |
| 20F24319            | 17.0 % | ✓ | 0.0201090       | 2.511964         | 0.0000000        | 203.4413        | 717.137         | 10.64 ±0.01      | 99.15          | 2.67           | 34.8 ±3.8 |
| 20F24320            | 17.0 % | ✓ | 0.0225859       | 2.142778         | 0.0000000        | 165.7053        | 584.072         | 10.64 ±0.01      | 98.84          | 2.17           | 33.3 ±4.2 |
| 20F24322            | 17.0 % | ✓ | 0.0160378       | 1.879372         | 0.0000000        | 151.1225        | 532.599         | 10.64 ±0.01      | 99.09          | 1.98           | 34.6 ±5.3 |
| 20F24323            | 17.0 % | ✓ | 0.1562040       | 3.092923         | 0.0016368        | 231.9195        | 816.609         | 10.63 ±0.01      | 94.58          | 3.04           | 32.2 ±3.1 |
| 20F24325            | 17.0 % | ✓ | 0.0465383       | 3.331854         | 0.0000000        | 235.8169        | 829.955         | 10.62 ±0.01      | 98.34          | 3.09           | 30.4 ±2.4 |
| 20F24326            | 17.0 % | ✓ | 0.0573557       | 3.781329         | 0.0000000        | 295.9334        | 1042.948        | 10.64 ±0.01      | 98.37          | 3.88           | 33.7 ±2.3 |
| 20F24328            | 17.0 % | ✓ | 0.0579840       | 2.572170         | 0.0000000        | 201.8925        | 710.734         | 10.63 ±0.01      | 97.61          | 2.65           | 33.8 ±3.5 |
| 20F24329            | 17.0 % | ✓ | 0.0775636       | 2.953712         | 0.0000000        | 207.6980        | 731.316         | 10.63 ±0.01      | 96.91          | 2.73           | 30.2 ±2.8 |
| Σ                   |        |   | 2.0200890       | 96.430940        | 0.0016368        | 7621.2416       | 26864.564       |                  |                |                |           |

| Information on Analysis                                                                                                                                                                                                                                | Results                   | 40(r)/39(k) ± 2σ          | Age ± 2σ<br>(Ma)                                                              | MSWD                         | 39Ar(k)<br>(%,n)                                           | K/Ca ± 2σ  |
|--------------------------------------------------------------------------------------------------------------------------------------------------------------------------------------------------------------------------------------------------------|---------------------------|---------------------------|-------------------------------------------------------------------------------|------------------------------|------------------------------------------------------------|------------|
| Project = SWENTON (20-01)<br>Sample = VS17-020<br>Material = Sanidine<br>Location = Rhyolite Dome<br>Region = Eastern Oregon<br>Analyst = Dan Miggins<br>Irradiation = 20-OSU-01 (1D6-20)<br>J = 0.00165372 ± 0.00000119<br>FCT-NM = 28.201 ± 0.023 Ma | Age Plateau<br>Error Mean | 3.52448 ± 0.00107 ± 0.03% | 10.64 ± 0.02 ± 0.15%<br>Full External Error ± 0.55<br>Analytical Error ± 0.00 | 3.08<br>0%<br>1.53<br>1.7538 | 100.00<br>30<br>2σ Confidence Limit<br>Error Magnification | 33.9 ± 0.8 |
|                                                                                                                                                                                                                                                        | Total Fusion Age          | 3.52496 ± 0.00064 ± 0.02% | 10.64 ± 0.02 ± 0.14%<br>Full External Error ± 0.55<br>Analytical Error ± 0.00 |                              | 30                                                         | 34.0 ± 0.5 |

| Normal Isochron |        |   | 39(k)/36(a) ± 2σ  | 40(a+r)/36(a) ± 2σ | r.i.   |
|-----------------|--------|---|-------------------|--------------------|--------|
| 20F24286        | 17.0 % | ✓ | 5344.28 ±177.83   | 19102.80 ±635.41   | 0.9996 |
| 20F24287        | 17.0 % | ✓ | 4094.56 ±113.48   | 14723.15 ±407.84   | 0.9995 |
| 20F24289        | 17.0 % | ✓ | 7574.16 ±290.39   | 27031.96 ±1036.12  | 0.9997 |
| 20F24290        | 17.0 % | ✓ | 24770.88 ±3019.14 | 87477.98 ±10661.77 | 1.0000 |
| 20F24292        | 17.0 % | ✓ | 1677.58 ±13.34    | 6216.99 ±49.14     | 0.9942 |
| 20F24293        | 17.0 % | ✓ | 7311.65 ±227.22   | 26079.21 ±810.12   | 0.9996 |
| 20F24295        | 17.0 % | ✓ | 9083.85 ±219.90   | 32329.31 ±782.14   | 0.9994 |
| 20F24296        | 17.0 % | ✓ | 6768.62 ±107.64   | 24175.60 ±383.90   | 0.9986 |
| 20F24298        | 17.0 % | ✓ | 536.74 ±3.86      | 2190.77 ±15.66     | 0.9924 |
| 20F24299        | 17.0 % | ✓ | 2181.55 ±28.34    | 7983.45 ±103.49    | 0.9977 |
| 20F24301        | 17.0 % | ✓ | 7568.99 ±182.25   | 26958.87 ±648.73   | 0.9994 |
| 20F24302        | 17.0 % | ✓ | 29607.41 ±1506.92 | 104699.30 ±5328.13 | 0.9999 |
| 20F24304        | 17.0 % | ✓ | 7217.54 ±146.19   | 25727.06 ±520.63   | 0.9991 |
| 20F24305        | 17.0 % | ✓ | 4725.69 ±77.83    | 16951.64 ±278.80   | 0.9986 |
| 20F24307        | 17.0 % | ✓ | 2940.23 ±49.27    | 10667.04 ±178.51   | 0.9986 |
| 20F24308        | 17.0 % | ✓ | 3671.33 ±35.17    | 13260.23 ±126.52   | 0.9960 |
| 20F24310        | 17.0 % | ✓ | 1258.14 ±9.40     | 4735.10 ±35.15     | 0.9933 |
| 20F24311        | 17.0 % | ✓ | 6599.18 ±155.34   | 23557.24 ±554.14   | 0.9993 |
| 20F24313        | 17.0 % | ✓ | 10188.95 ±265.15  | 36189.85 ±941.29   | 0.9994 |
| 20F24314        | 17.0 % | ✓ | 8414.65 ±183.61   | 29975.42 ±653.59   | 0.9992 |
| 20F24316        | 17.0 % | ✓ | 3240.53 ±50.31    | 11726.09 ±181.79   | 0.9984 |
| 20F24317        | 17.0 % | ✓ | 12418.04 ±415.84  | 44083.70 ±1475.73  | 0.9997 |
| 20F24319        | 17.0 % | ✓ | 10116.91 ±413.77  | 35961.01 ±1470.44  | 0.9998 |
| 20F24320        | 17.0 % | ✓ | 7336.69 ±250.21   | 26158.63 ±891.82   | 0.9997 |
| 20F24322        | 17.0 % | ✓ | 9422.92 ±382.46   | 33507.65 ±1359.72  | 0.9998 |
| 20F24323        | 17.0 % | ✓ | 1484.72 ±13.19    | 5526.39 ±48.88     | 0.9952 |
| 20F24325        | 17.0 % | ✓ | 5067.15 ±101.43   | 18132.35 ±362.64   | 0.9991 |
| 20F24326        | 17.0 % | ✓ | 5159.62 ±96.23    | 18482.44 ±344.34   | 0.9989 |
| 20F24328        | 17.0 % | ✓ | 3481.86 ±58.61    | 12555.97 ±211.06   | 0.9986 |
| 20F24329        | 17.0 % | ✓ | 2677.78 ±33.71    | 9727.16 ±122.18    | 0.9976 |

| Results         | 40(a)/36(a) ± 2σ      | 40(r)/39(k) ± 2σ | Age ± 2σ (Ma)             | MSWD            |
|-----------------|-----------------------|------------------|---------------------------|-----------------|
| Normal Isochron | 300.15 ±4.20          | 3.52372 ±0.00153 | 10.64 ±0.02               | 3.30            |
| Error Chron     | ±1.40%                | ±0.04%           | ±0.15%                    | 0%              |
|                 |                       |                  | Full External Error ±0.55 |                 |
|                 |                       |                  | Analytical Error ±0.00    |                 |
|                 |                       |                  |                           |                 |
| Statistics      | 2σ Confidence Limit   | 1.53             | Convergence               | 0.000000314971  |
|                 | Error Magnification   | 1.8153           | Number of Iterations      | 1               |
|                 | Number of Data Points | 30               | Calculated Line           | Weighted York-2 |

| Inverse Isochron |        |   | 39(k)/40(a+r) ± 2σ   | 36(a)/40(a+r) ± 2σ     | r.i.   |
|------------------|--------|---|----------------------|------------------------|--------|
| 20F24286         | 17.0 % | ✓ | 0.2797642 ±0.0002515 | 0.00005235 ±0.00000174 | 0.0008 |
| 20F24287         | 17.0 % | ✓ | 0.2781033 ±0.0002526 | 0.00006792 ±0.00000188 | 0.0013 |
| 20F24289         | 17.0 % | ✓ | 0.2801926 ±0.0002496 | 0.00003699 ±0.00000142 | 0.0006 |
| 20F24290         | 17.0 % | ✓ | 0.2831670 ±0.0002554 | 0.00001143 ±0.00000139 | 0.0002 |
| 20F24292         | 17.0 % | ✓ | 0.2698387 ±0.0002317 | 0.00016085 ±0.00000127 | 0.0011 |
| 20F24293         | 17.0 % | ✓ | 0.2803631 ±0.0002463 | 0.00003834 ±0.00000119 | 0.0006 |
| 20F24295         | 17.0 % | ✓ | 0.2809787 ±0.0002417 | 0.00003093 ±0.00000075 | 0.0004 |
| 20F24296         | 17.0 % | ✓ | 0.2799774 ±0.0002392 | 0.00004136 ±0.00000066 | 0.0004 |
| 20F24298         | 17.0 % | ✓ | 0.2450014 ±0.0002175 | 0.00045646 ±0.00000326 | 0.0031 |
| 20F24299         | 17.0 % | ✓ | 0.2732585 ±0.0002380 | 0.00012526 ±0.00000162 | 0.0012 |
| 20F24301         | 17.0 % | ✓ | 0.2807606 ±0.0002422 | 0.00003709 ±0.00000089 | 0.0006 |
| 20F24302         | 17.0 % | ✓ | 0.2827852 ±0.0002419 | 0.00000955 ±0.00000049 | 0.0001 |
| 20F24304         | 17.0 % | ✓ | 0.2805427 ±0.0002422 | 0.00003887 ±0.00000079 | 0.0006 |
| 20F24305         | 17.0 % | ✓ | 0.2787749 ±0.0002397 | 0.00005899 ±0.00000097 | 0.0006 |
| 20F24307         | 17.0 % | ✓ | 0.2756366 ±0.0002421 | 0.00009375 ±0.00000157 | 0.0011 |
| 20F24308         | 17.0 % | ✓ | 0.2768679 ±0.0002366 | 0.00007541 ±0.00000072 | 0.0006 |
| 20F24310         | 17.0 % | ✓ | 0.2657050 ±0.0002290 | 0.00021119 ±0.00000157 | 0.0017 |
| 20F24311         | 17.0 % | ✓ | 0.2801338 ±0.0002441 | 0.00004245 ±0.00000100 | 0.0007 |
| 20F24313         | 17.0 % | ✓ | 0.2815417 ±0.0002433 | 0.00002763 ±0.00000072 | 0.0004 |
| 20F24314         | 17.0 % | ✓ | 0.2807184 ±0.0002410 | 0.00003336 ±0.00000073 | 0.0004 |
| 20F24316         | 17.0 % | ✓ | 0.2763518 ±0.0002395 | 0.00008528 ±0.00000132 | 0.0010 |
| 20F24317         | 17.0 % | ✓ | 0.2816922 ±0.0002437 | 0.00002268 ±0.00000076 | 0.0004 |
| 20F24319         | 17.0 % | ✓ | 0.2813300 ±0.0002447 | 0.00002781 ±0.00000114 | 0.0004 |
| 20F24320         | 17.0 % | ✓ | 0.2804691 ±0.0002479 | 0.00003823 ±0.00000130 | 0.0007 |
| 20F24322         | 17.0 % | ✓ | 0.2812168 ±0.0002495 | 0.00002984 ±0.00000121 | 0.0006 |
| 20F24323         | 17.0 % | ✓ | 0.2686601 ±0.0002334 | 0.00018095 ±0.00000160 | 0.0018 |
| 20F24325         | 17.0 % | ✓ | 0.2794537 ±0.0002421 | 0.00005515 ±0.00000110 | 0.0008 |
| 20F24326         | 17.0 % | ✓ | 0.2791634 ±0.0002423 | 0.00005411 ±0.00000101 | 0.0006 |
| 20F24328         | 17.0 % | ✓ | 0.2773073 ±0.0002432 | 0.00007964 ±0.00000134 | 0.0010 |
| 20F24329         | 17.0 % | ✓ | 0.2752887 ±0.0002398 | 0.00010280 ±0.00000129 | 0.0014 |

| Results          | 40(a)/36(a) ± 2σ      | 40(r)/39(k) ± 2σ | Age ± 2σ (Ma)             | MSWD            |
|------------------|-----------------------|------------------|---------------------------|-----------------|
| Inverse Isochron | 299.00 ±4.13          | 3.52437 ±0.00150 | 10.64 ±0.02               | 3.19            |
| Error Chron      | ±1.38%                | ±0.04%           | ±0.15%                    | 0%              |
|                  |                       |                  | Full External Error ±0.55 |                 |
|                  |                       |                  | Analytical Error ±0.00    |                 |
|                  |                       |                  |                           |                 |
| Statistics       | 2σ Confidence Limit   | 1.53             | Convergence               | 0.0000251317    |
|                  | Error Magnification   | 1.7859           | Number of Iterations      | 2               |
|                  | Number of Data Points | 30               | Calculated Line           | Weighted York-2 |
|                  | Spreading Factor      | 13.5%            |                           |                 |

| Degassing Patterns |        |   | 36Ar(a)<br>[fA] | %1σ  | 36Ar(c)<br>[fA] | %1σ  | 36Ar(ca)<br>[fA] | %1σ   | 36Ar(cl)<br>[fA] | %1σ    | 37Ar(ca)<br>[fA] | %1σ   | 38Ar(a)<br>[fA] | %1σ  | 38Ar(c)<br>[fA] | %1σ  | 38Ar(k)<br>[fA] | %1σ  | 38Ar(ca)<br>[fA] | %1σ       | 38Ar(cl)<br>[fA] | %1σ    | 39Ar(k)<br>[fA] | %1σ       | 39Ar(ca)<br>[fA] | %1σ   |
|--------------------|--------|---|-----------------|------|-----------------|------|------------------|-------|------------------|--------|------------------|-------|-----------------|------|-----------------|------|-----------------|------|------------------|-----------|------------------|--------|-----------------|-----------|------------------|-------|
| 20F24286           | 17.0 % | ✓ | 0.0226245       | 1.66 | 0.0000000       | 0.00 | 0.0003954        | 9.71  | 0.0000000        | 0.00   | 1.462794         | 9.71  | 0.0042647       | 1.67 | 0.0000000       | 0.00 | 1.460252        | 0.10 | 0.0002633        | 13.67     | 0.0000000        | 0.00   | 120.9118        | 0.04      | 0.0009398        | 9.75  |
| 20F24287           | 17.0 % | ✓ | 0.0273696       | 1.38 | 0.0000000       | 0.00 | 0.0004042        | 9.21  | 0.0000000        | 0.00   | 1.495212         | 9.21  | 0.0051592       | 1.39 | 0.0000000       | 0.00 | 1.353423        | 0.10 | 0.0002691        | 13.32     | 0.0000000        | 0.00   | 112.0662        | 0.04      | 0.0009607        | 9.25  |
| 20F24289           | 17.0 % | ✓ | 0.0181278       | 1.92 | 0.0000000       | 0.00 | 0.0004198        | 8.78  | 0.0000000        | 0.00   | 1.553220         | 8.78  | 0.0034171       | 1.92 | 0.0000000       | 0.00 | 1.658206        | 0.10 | 0.0002796        | 13.03     | 0.0000000        | 0.00   | 137.3028        | 0.04      | 0.0009979        | 8.83  |
| 20F24290           | 17.0 % | ✓ | 0.0047031       | 6.09 | 0.0000000       | 0.00 | 0.0003808        | 10.43 | 0.0000000        | 0.00   | 1.408857         | 10.43 | 0.0008865       | 6.10 | 0.0000000       | 0.00 | 1.406967        | 0.10 | 0.0002536        | 14.19     | 0.0000000        | 0.00   | 116.4997        | 0.04      | 0.0009052        | 10.47 |
| 20F24292           | 17.0 % | ✓ | 0.2313417       | 0.40 | 0.0000000       | 0.00 | 0.0013464        | 2.77  | 0.0000000        | 0.00   | 4.981026         | 2.76  | 0.0436079       | 0.43 | 0.0000000       | 0.00 | 4.687025        | 0.10 | 0.0008966        | 10.02     | 0.0000000        | 0.00   | 388.0952        | 0.04      | 0.0032003        | 2.91  |
| 20F24293           | 17.0 % | ✓ | 0.0262002       | 1.55 | 0.0000000       | 0.00 | 0.0006330        | 5.51  | 0.0000000        | 0.00   | 2.341853         | 5.50  | 0.0049387       | 1.56 | 0.0000000       | 0.00 | 2.313552        | 0.10 | 0.0004215        | 11.09     | 0.0000000        | 0.00   | 191.5668        | 0.04      | 0.0015046        | 5.58  |
| 20F24295           | 17.0 % | ✓ | 0.0396915       | 1.21 | 0.0000000       | 0.00 | 0.0012268        | 3.09  | 0.0000000        | 0.00   | 4.538481         | 3.09  | 0.0074818       | 1.22 | 0.0000000       | 0.00 | 4.354381        | 0.10 | 0.0008169        | 10.11     | 0.0000000        | 0.00   | 360.5516        | 0.04      | 0.0029160        | 3.22  |
| 20F24296           | 17.0 % | ✓ | 0.0682020       | 0.79 | 0.0000000       | 0.00 | 0.0015801        | 2.37  | 0.0000000        | 0.00   | 5.845746         | 2.37  | 0.0128561       | 0.81 | 0.0000000       | 0.00 | 5.575147        | 0.10 | 0.0010522        | 9.92      | 0.0000000        | 0.00   | 461.6334        | 0.04      | 0.0037559        | 2.54  |
| 20F24298           | 17.0 % | ✓ | 0.2764723       | 0.36 | 0.0000000       | 0.00 | 0.0006208        | 6.37  | 0.0000000        | 0.00   | 2.296558         | 6.37  | 0.0521150       | 0.39 | 0.0000000       | 0.00 | 1.792155        | 0.10 | 0.0004134        | 11.55     | 0.0000000        | 0.00   | 148.3941        | 0.04      | 0.0014755        | 6.44  |
| 20F24299           | 17.0 % | ✓ | 0.0922512       | 0.65 | 0.0000000       | 0.00 | 0.0007609        | 4.95  | 0.0000000        | 0.00   | 2.814862         | 4.94  | 0.0173893       | 0.67 | 0.0000000       | 0.00 | 2.430497        | 0.10 | 0.0005067        | 10.82     | 0.0000000        | 0.00   | 201.2501        | 0.04      | 0.0018085        | 5.03  |
| 20F24301           | 17.0 % | ✓ | 0.0362885       | 1.20 | 0.0000000       | 0.00 | 0.0008865        | 4.10  | 0.0000000        | 0.00   | 3.279652         | 4.10  | 0.0068404       | 1.21 | 0.0000000       | 0.00 | 3.317160        | 0.10 | 0.0005903        | 10.47     | 0.0000000        | 0.00   | 274.6675        | 0.04      | 0.0021072        | 4.20  |
| 20F24302           | 17.0 % | ✓ | 0.0159874       | 2.54 | 0.0000000       | 0.00 | 0.0015162        | 2.58  | 0.0000000        | 0.00   | 5.609185         | 2.57  | 0.0030136       | 2.55 | 0.0000000       | 0.00 | 5.716591        | 0.10 | 0.0010097        | 9.97      | 0.0000000        | 0.00   | 473.3453        | 0.04      | 0.0036039        | 2.73  |
| 20F24304           | 17.0 % | ✓ | 0.0441771       | 1.01 | 0.0000000       | 0.00 | 0.0009564        | 3.84  | 0.0000000        | 0.00   | 3.538153         | 3.84  | 0.0083274       | 1.02 | 0.0000000       | 0.00 | 3.850749        | 0.10 | 0.0006369        | 10.37     | 0.0000000        | 0.00   | 318.8498        | 0.04      | 0.0022733        | 3.95  |
| 20F24305           | 17.0 % | ✓ | 0.0682421       | 0.82 | 0.0000000       | 0.00 | 0.0011919        | 3.19  | 0.0000000        | 0.00   | 4.409396         | 3.19  | 0.0128636       | 0.84 | 0.0000000       | 0.00 | 3.894726        | 0.10 | 0.0007937        | 10.14     | 0.0000000        | 0.00   | 322.4912        | 0.04      | 0.0028330        | 3.32  |
| 20F24307           | 17.0 % | ✓ | 0.0592076       | 0.84 | 0.0000000       | 0.00 | 0.0006188        | 5.84  | 0.0000000        | 0.00   | 2.289311         | 5.84  | 0.0111606       | 0.85 | 0.0000000       | 0.00 | 2.102410        | 0.10 | 0.0004121        | 11.26     | 0.0000000        | 0.00   | 174.0838        | 0.04      | 0.0014709        | 5.91  |
| 20F24308           | 17.0 % | ✓ | 0.1316040       | 0.48 | 0.0000000       | 0.00 | 0.0015265        | 2.32  | 0.0000000        | 0.00   | 5.647425         | 2.32  | 0.0248074       | 0.50 | 0.0000000       | 0.00 | 5.835152        | 0.10 | 0.0010165        | 9.90      | 0.0000000        | 0.00   | 483.1624        | 0.04      | 0.0036285        | 2.49  |
| 20F24310           | 17.0 % | ✓ | 0.2073028       | 0.37 | 0.0000000       | 0.00 | 0.0009391        | 4.03  | 0.0000000        | 0.00   | 3.474462         | 4.03  | 0.0390766       | 0.40 | 0.0000000       | 0.00 | 3.149875        | 0.10 | 0.0006254        | 10.44     | 0.0000000        | 0.00   | 260.8160        | 0.04      | 0.0022323        | 4.13  |
| 20F24311           | 17.0 % | ✓ | 0.0346562       | 1.18 | 0.0000000       | 0.00 | 0.0008290        | 4.70  | 0.0000000        | 0.00   | 3.067103         | 4.70  | 0.0065327       | 1.19 | 0.0000000       | 0.00 | 2.762044        | 0.10 | 0.0005521        | 10.71     | 0.0000000        | 0.00   | 228.7028        | 0.04      | 0.0019706        | 4.79  |
| 20F24313           | 17.0 % | ✓ | 0.0288066       | 1.30 | 0.0000000       | 0.00 | 0.0009786        | 3.66  | 0.0000000        | 0.00   | 3.620590         | 3.66  | 0.0054300       | 1.31 | 0.0000000       | 0.00 | 3.544708        | 0.10 | 0.0006517        | 10.30     | 0.0000000        | 0.00   | 293.5090        | 0.04      | 0.0023262        | 3.77  |
| 20F24314           | 17.0 % | ✓ | 0.0430852       | 1.09 | 0.0000000       | 0.00 | 0.0012108        | 3.10  | 0.0000000        | 0.00   | 4.479564         | 3.09  | 0.0081216       | 1.10 | 0.0000000       | 0.00 | 4.378479        | 0.10 | 0.0008063        | 10.11     | 0.0000000        | 0.00   | 362.5469        | 0.04      | 0.0028781        | 3.23  |
| 20F24316           | 17.0 % | ✓ | 0.0667420       | 0.78 | 0.0000000       | 0.00 | 0.0007400        | 5.17  | 0.0000000        | 0.00   | 2.737584         | 5.17  | 0.0125809       | 0.79 | 0.0000000       | 0.00 | 2.612004        | 0.10 | 0.0004928        | 10.93     | 0.0000000        | 0.00   | 216.2792        | 0.04      | 0.0017589        | 5.25  |
| 20F24317           | 17.0 % | ✓ | 0.0226273       | 1.67 | 0.0000000       | 0.00 | 0.0008849        | 4.28  | 0.0000000        | 0.00   | 3.273806         | 4.27  | 0.0042652       | 1.68 | 0.0000000       | 0.00 | 3.393478        | 0.10 | 0.0005893        | 10.53     | 0.0000000        | 0.00   | 280.9868        | 0.04      | 0.0021034        | 4.37  |
| 20F24319           | 17.0 % | ✓ | 0.0201090       | 2.04 | 0.0000000       | 0.00 | 0.0006790        | 5.52  | 0.0000000        | 0.00   | 2.511964         | 5.52  | 0.0037906       | 2.05 | 0.0000000       | 0.00 | 2.456960        | 0.10 | 0.0004522        | 11.10     | 0.0000000        | 0.00   | 203.4413        | 0.04      | 0.0016139        | 5.59  |
| 20F24320           | 17.0 % | ✓ | 0.0225859       | 1.70 | 0.0000000       | 0.00 | 0.0005792        | 6.33  | 0.0000000        | 0.00   | 2.142778         | 6.33  | 0.0042574       | 1.71 | 0.0000000       | 0.00 | 2.001223        | 0.10 | 0.0003857        | 11.52     | 0.0000000        | 0.00   | 165.7053        | 0.04      | 0.0013767        | 6.39  |
| 20F24322           | 17.0 % | ✓ | 0.0160378       | 2.03 | 0.0000000       | 0.00 | 0.0005080        | 7.64  | 0.0000000        | 0.00   | 1.879372         | 7.64  | 0.0030231       | 2.04 | 0.0000000       | 0.00 | 1.825106        | 0.10 | 0.0003383        | 12.29     | 0.0000000        | 0.00   | 151.1225        | 0.04      | 0.0012075        | 7.69  |
| 20F24323           | 17.0 % | ✓ | 0.1562040       | 0.44 | 0.0000000       | 0.00 | 0.0008360        | 4.74  | 0.0000004        | 711.93 | 3.092923         | 4.74  | 0.0294445       | 0.47 | 0.0000000       | 0.00 | 2.800891        | 0.10 | 0.0005567        | 10.73     | 0.0016368        | 711.93 | 231.9195        | 0.04      | 0.0019872        | 4.83  |
| 20F24325           | 17.0 % | ✓ | 0.0465383       | 1.00 | 0.0000000       | 0.00 | 0.0009006        | 3.97  | 0.0000000        | 0.00   | 3.331854         | 3.96  | 0.0087725       | 1.01 | 0.0000000       | 0.00 | 2.847961        | 0.10 | 0.0005997        | 10.41     | 0.0000000        | 0.00   | 235.8169        | 0.04      | 0.0021407        | 4.07  |
| 20F24326           | 17.0 % | ✓ | 0.0573557       | 0.93 | 0.0000000       | 0.00 | 0.0010221        | 3.48  | 0.0000000        | 0.00   | 3.781329         | 3.48  | 0.0108115       | 0.94 | 0.0000000       | 0.00 | 3.573987        | 0.10 | 0.0006806        | 10.24     | 0.0000000        | 0.00   | 295.9334        | 0.04      | 0.0024295        | 3.60  |
| 20F24328           | 17.0 % | ✓ | 0.0579840       | 0.84 | 0.0000000       | 0.00 | 0.0006953        | 5.25  | 0.0000000        | 0.00   | 2.572170         | 5.25  | 0.0109300       | 0.86 | 0.0000000       | 0.00 | 2.438256        | 0.10 | 0.0004630        | 10.97     | 0.0000000        | 0.00   | 201.8925        | 0.04      | 0.0016526        | 5.33  |
| 20F24329           | 17.0 % | ✓ | 0.0775636       | 0.63 | 0.0000000       | 0.00 | 0.0007984        | 4.58  | 0.0000000        | 0.00   | 2.953712         | 4.58  | 0.0146207       | 0.65 | 0.0000000       | 0.00 | 2.508369        | 0.10 | 0.0005317        | 10.66     | 0.0000000        | 0.00   | 207.6980        | 0.04      | 0.0018978        | 4.67  |
| Σ                  |        |   | 2.0200890       | 0.14 | 0.0000000       | 0.00 | 0.0260653        | 0.79  | 0.0000004        | 711.93 | 96.430940        | 0.79  | 0.3807868       | 0.15 | 0.0000000       | 0.00 | 92.041734       | 0.02 | 0.0173576        | 2.04      | 0.0016368        | 711.93 | 7621.2416       | 0.01      | 0.0619569        | 0.81  |
| Σ                  |        |   |                 |      |                 |      |                  |       | 2.0461546        | 0.14   | 96.430940        | 0.79  |                 |      |                 |      |                 |      |                  | 92.441516 | 0.02             |        |                 | 7621.3035 | 0.01             |       |

| 40Ar(r)<br>[fA] | %1σ  | 40Ar(a)<br>[fA] | %1σ  | 40Ar(c)<br>[fA] | %1σ  | 40Ar(k)<br>[fA] | %1σ  |
|-----------------|------|-----------------|------|-----------------|------|-----------------|------|
| 425.437         | 0.03 | 6.75478         | 1.67 | 0.0000000       | 0.00 | 0.0733935       | 9.65 |
| 394.795         | 0.03 | 8.17145         | 1.39 | 0.0000000       | 0.00 | 0.0680242       | 9.65 |
| 484.618         | 0.02 | 5.41224         | 1.92 | 0.0000000       | 0.00 | 0.0833428       | 9.65 |
| 410.013         | 0.02 | 1.40415         | 6.09 | 0.0000000       | 0.00 | 0.0707153       | 9.65 |
| 1369.179        | 0.02 | 69.06939        | 0.41 | 0.0000000       | 0.00 | 0.2355738       | 9.65 |
| 675.459         | 0.02 | 7.82233         | 1.56 | 0.0000000       | 0.00 | 0.1162810       | 9.65 |
| 1271.349        | 0.01 | 11.85029        | 1.21 | 0.0000000       | 0.00 | 0.2188548       | 9.65 |
| 1628.461        | 0.01 | 20.36239        | 0.80 | 0.0000000       | 0.00 | 0.2802115       | 9.65 |
| 523.143         | 0.06 | 82.54356        | 0.37 | 0.0000000       | 0.00 | 0.0900752       | 9.65 |
| 708.940         | 0.03 | 27.54251        | 0.66 | 0.0000000       | 0.00 | 0.1221588       | 9.65 |
| 967.463         | 0.01 | 10.83430        | 1.21 | 0.0000000       | 0.00 | 0.1667232       | 9.65 |
| 1669.096        | 0.01 | 4.77320         | 2.55 | 0.0000000       | 0.00 | 0.2873206       | 9.65 |
| 1123.357        | 0.01 | 13.18951        | 1.02 | 0.0000000       | 0.00 | 0.1935418       | 9.65 |
| 1136.441        | 0.02 | 20.37436        | 0.83 | 0.0000000       | 0.00 | 0.1957522       | 9.65 |
| 613.893         | 0.03 | 17.67702        | 0.84 | 0.0000000       | 0.00 | 0.1056689       | 9.65 |
| 1705.809        | 0.01 | 39.29170        | 0.49 | 0.0000000       | 0.00 | 0.2932796       | 9.65 |
| 919.708         | 0.03 | 61.89231        | 0.39 | 0.0000000       | 0.00 | 0.1583153       | 9.65 |
| 806.058         | 0.02 | 10.34697        | 1.18 | 0.0000000       | 0.00 | 0.1388226       | 9.65 |
| 1033.906        | 0.01 | 8.60050         | 1.30 | 0.0000000       | 0.00 | 0.1781600       | 9.65 |
| 1278.633        | 0.01 | 12.86351        | 1.10 | 0.0000000       | 0.00 | 0.2200660       | 9.65 |
| 762.696         | 0.02 | 19.92649        | 0.78 | 0.0000000       | 0.00 | 0.1312815       | 9.65 |
| 990.740         | 0.01 | 6.75561         | 1.68 | 0.0000000       | 0.00 | 0.1705590       | 9.65 |
| 717.137         | 0.02 | 6.00375         | 2.05 | 0.0000000       | 0.00 | 0.1234888       | 9.65 |
| 584.072         | 0.02 | 6.74323         | 1.71 | 0.0000000       | 0.00 | 0.1005831       | 9.65 |
| 532.599         | 0.02 | 4.78823         | 2.03 | 0.0000000       | 0.00 | 0.0917313       | 9.65 |
| 816.609         | 0.03 | 46.63627        | 0.45 | 0.0000000       | 0.00 | 0.1407751       | 9.65 |
| 829.955         | 0.02 | 13.89449        | 1.01 | 0.0000000       | 0.00 | 0.1431409       | 9.65 |
| 1042.948        | 0.02 | 17.12411        | 0.94 | 0.0000000       | 0.00 | 0.1796316       | 9.65 |
| 710.734         | 0.02 | 17.31172        | 0.85 | 0.0000000       | 0.00 | 0.1225487       | 9.65 |
| 731.316         | 0.02 | 23.15738        | 0.64 | 0.0000000       | 0.00 | 0.1260727       | 9.65 |
| 26864.564       | 0.00 | 603.11777       | 0.14 | 0.0000000       | 0.00 | 4.6260936       | 1.90 |
|                 |      |                 |      |                 |      | 27472.308       | 0.00 |



| Additional Parameters |        |   | 40Ar/39Ar | 1σ       | 37Ar/39Ar | 1σ       | 36Ar/39Ar | 1σ       | Time (days) | 37Ar (decay) | 39Ar (decay) | 40Ar (moles) |
|-----------------------|--------|---|-----------|----------|-----------|----------|-----------|----------|-------------|--------------|--------------|--------------|
| 20F24286              | 17.0 % | ✓ | 3.575018  | 0.001606 | 0.012098  | 0.001175 | 0.000190  | 0.000003 | 143.213     | 16.965829    | 1.00101190   | 1.530E-11    |
| 20F24287              | 17.0 % | ✓ | 3.596362  | 0.001632 | 0.013342  | 0.001228 | 0.000248  | 0.000003 | 143.218     | 16.967691    | 1.00101194   | 1.427E-11    |
| 20F24289              | 17.0 % | ✓ | 3.569555  | 0.001589 | 0.011312  | 0.000993 | 0.000135  | 0.000003 | 143.230     | 16.971648    | 1.00101202   | 1.735E-11    |
| 20F24290              | 17.0 % | ✓ | 3.532065  | 0.001592 | 0.012093  | 0.001261 | 0.000044  | 0.000002 | 143.236     | 16.973744    | 1.00101207   | 1.457E-11    |
| 20F24292              | 17.0 % | ✓ | 3.706494  | 0.001590 | 0.012834  | 0.000355 | 0.000600  | 0.000002 | 143.248     | 16.977702    | 1.00101215   | 5.092E-11    |
| 20F24293              | 17.0 % | ✓ | 3.567382  | 0.001566 | 0.012225  | 0.000673 | 0.000140  | 0.000002 | 143.254     | 16.979798    | 1.00101220   | 2.419E-11    |
| 20F24295              | 17.0 % | ✓ | 3.559567  | 0.001530 | 0.012588  | 0.000389 | 0.000113  | 0.000001 | 143.266     | 16.983758    | 1.00101228   | 4.543E-11    |
| 20F24296              | 17.0 % | ✓ | 3.572295  | 0.001525 | 0.012663  | 0.000300 | 0.000151  | 0.000001 | 143.272     | 16.985855    | 1.00101232   | 5.838E-11    |
| 20F24298              | 17.0 % | ✓ | 4.082176  | 0.001811 | 0.015476  | 0.000986 | 0.001867  | 0.000007 | 143.284     | 16.989816    | 1.00101241   | 2.144E-11    |
| 20F24299              | 17.0 % | ✓ | 3.660112  | 0.001593 | 0.013987  | 0.000691 | 0.000462  | 0.000003 | 143.290     | 16.991680    | 1.00101245   | 2.608E-11    |
| 20F24301              | 17.0 % | ✓ | 3.562332  | 0.001535 | 0.011940  | 0.000490 | 0.000135  | 0.000002 | 143.302     | 16.995876    | 1.00101253   | 3.464E-11    |
| 20F24302              | 17.0 % | ✓ | 3.536834  | 0.001512 | 0.011850  | 0.000305 | 0.000037  | 0.000001 | 143.308     | 16.997741    | 1.00101257   | 5.927E-11    |
| 20F24304              | 17.0 % | ✓ | 3.565101  | 0.001538 | 0.011097  | 0.000426 | 0.000142  | 0.000001 | 143.319     | 17.001705    | 1.00101266   | 4.024E-11    |
| 20F24305              | 17.0 % | ✓ | 3.587699  | 0.001541 | 0.013673  | 0.000436 | 0.000215  | 0.000002 | 143.326     | 17.003804    | 1.00101270   | 4.096E-11    |
| 20F24307              | 17.0 % | ✓ | 3.628541  | 0.001593 | 0.013151  | 0.000768 | 0.000344  | 0.000003 | 143.338     | 17.007770    | 1.00101278   | 2.236E-11    |
| 20F24308              | 17.0 % | ✓ | 3.612410  | 0.001542 | 0.011688  | 0.000271 | 0.000276  | 0.000001 | 143.344     | 17.009869    | 1.00101283   | 6.179E-11    |
| 20F24310              | 17.0 % | ✓ | 3.764147  | 0.001621 | 0.013321  | 0.000537 | 0.000798  | 0.000003 | 143.356     | 17.013836    | 1.00101291   | 3.475E-11    |
| 20F24311              | 17.0 % | ✓ | 3.570298  | 0.001554 | 0.013411  | 0.000630 | 0.000155  | 0.000002 | 143.361     | 17.015703    | 1.00101295   | 2.891E-11    |
| 20F24313              | 17.0 % | ✓ | 3.552450  | 0.001534 | 0.012335  | 0.000451 | 0.000101  | 0.000001 | 143.374     | 17.019905    | 1.00101304   | 3.691E-11    |
| 20F24314              | 17.0 % | ✓ | 3.562867  | 0.001528 | 0.012356  | 0.000382 | 0.000122  | 0.000001 | 143.379     | 17.021773    | 1.00101308   | 4.573E-11    |
| 20F24316              | 17.0 % | ✓ | 3.619154  | 0.001567 | 0.012658  | 0.000654 | 0.000312  | 0.000002 | 143.391     | 17.025743    | 1.00101316   | 2.771E-11    |
| 20F24317              | 17.0 % | ✓ | 3.550554  | 0.001535 | 0.011651  | 0.000498 | 0.000084  | 0.000001 | 143.397     | 17.027845    | 1.00101321   | 3.532E-11    |
| 20F24319              | 17.0 % | ✓ | 3.555124  | 0.001545 | 0.012347  | 0.000681 | 0.000102  | 0.000002 | 143.409     | 17.031816    | 1.00101329   | 2.560E-11    |
| 20F24320              | 17.0 % | ✓ | 3.566032  | 0.001575 | 0.012931  | 0.000818 | 0.000140  | 0.000002 | 143.415     | 17.033918    | 1.00101333   | 2.092E-11    |
| 20F24322              | 17.0 % | ✓ | 3.556553  | 0.001577 | 0.012436  | 0.000950 | 0.000109  | 0.000002 | 143.427     | 17.037891    | 1.00101342   | 1.903E-11    |
| 20F24323              | 17.0 % | ✓ | 3.722750  | 0.001616 | 0.013336  | 0.000632 | 0.000677  | 0.000003 | 143.433     | 17.039761    | 1.00101346   | 3.056E-11    |
| 20F24325              | 17.0 % | ✓ | 3.578984  | 0.001549 | 0.014129  | 0.000560 | 0.000201  | 0.000002 | 143.445     | 17.043968    | 1.00101354   | 2.988E-11    |
| 20F24326              | 17.0 % | ✓ | 3.582709  | 0.001554 | 0.012778  | 0.000445 | 0.000197  | 0.000002 | 143.451     | 17.045839    | 1.00101358   | 3.753E-11    |
| 20F24328              | 17.0 % | ✓ | 3.606685  | 0.001580 | 0.012740  | 0.000668 | 0.000291  | 0.000002 | 143.463     | 17.049814    | 1.00101367   | 2.578E-11    |
| 20F24329              | 17.0 % | ✓ | 3.633124  | 0.001581 | 0.014221  | 0.000651 | 0.000377  | 0.000002 | 143.469     | 17.051919    | 1.00101371   | 2.671E-11    |

| Procedure<br>Blanks |        | 36Ar ± 1σ (SE)<br>[fA] | 37Ar ± 1σ (SE)<br>[fA] | 38Ar ± 1σ (SE)<br>[fA] | 39Ar ± 1σ (SE)<br>[fA] | 40Ar ± 1σ (SE)<br>[fA] |
|---------------------|--------|------------------------|------------------------|------------------------|------------------------|------------------------|
| 20F24286            | 17.0 % | 0.0048836 ±0.0001655   | 0.0166955 ±0.0056699   | 0.0130446 ±0.0059990   | 0.0117567 ±0.0059625   | 1.1358385 ±0.0143854   |
| 20F24287            | 17.0 % | 0.0048836 ±0.0001655   | 0.0166955 ±0.0056699   | 0.0130446 ±0.0059990   | 0.0117567 ±0.0059625   | 1.1358385 ±0.0143854   |
| 20F24289            | 17.0 % | 0.0042902 ±0.0001713   | 0.0108213 ±0.0063331   | 0.0046667 ±0.0070578   | 0.0154560 ±0.0060302   | 1.0464985 ±0.0133807   |
| 20F24290            | 17.0 % | 0.0042902 ±0.0001713   | 0.0108213 ±0.0063331   | 0.0046667 ±0.0070578   | 0.0154560 ±0.0060302   | 1.0464985 ±0.0133807   |
| 20F24292            | 17.0 % | 0.0048089 ±0.0001808   | 0.0173500 ±0.0051946   | 0.0033348 ±0.0061597   | 0.0126184 ±0.0062108   | 1.1251013 ±0.0166916   |
| 20F24293            | 17.0 % | 0.0048089 ±0.0001808   | 0.0173500 ±0.0051946   | 0.0033348 ±0.0061597   | 0.0126184 ±0.0062108   | 1.1251013 ±0.0166916   |
| 20F24295            | 17.0 % | 0.0049572 ±0.0002012   | 0.0220738 ±0.0055653   | 0.0019191 ±0.0062480   | 0.0181786 ±0.0066141   | 1.3059480 ±0.0150989   |
| 20F24296            | 17.0 % | 0.0049572 ±0.0002012   | 0.0220738 ±0.0055653   | 0.0019191 ±0.0062480   | 0.0181786 ±0.0066141   | 1.3059480 ±0.0150989   |
| 20F24298            | 17.0 % | 0.0050059 ±0.0001927   | 0.0263298 ±0.0060384   | 0.0021185 ±0.0065963   | 0.0022155 ±0.0069621   | 1.3802350 ±0.0143886   |
| 20F24299            | 17.0 % | 0.0050059 ±0.0001927   | 0.0263298 ±0.0060384   | 0.0021185 ±0.0065963   | 0.0022155 ±0.0069621   | 1.3802350 ±0.0143886   |
| 20F24301            | 17.0 % | 0.0057185 ±0.0001958   | 0.0248092 ±0.0056690   | 0.0023563 ±0.0073447   | 0.0024665 ±0.0057189   | 1.3395780 ±0.0151789   |
| 20F24302            | 17.0 % | 0.0057185 ±0.0001958   | 0.0248092 ±0.0056690   | 0.0023563 ±0.0073447   | 0.0024665 ±0.0057189   | 1.3395780 ±0.0151789   |
| 20F24304            | 17.0 % | 0.0048463 ±0.0001801   | 0.0223537 ±0.0056008   | 0.0028397 ±0.0067761   | 0.0423431 ±0.0053067   | 1.1331357 ±0.0156730   |
| 20F24305            | 17.0 % | 0.0048463 ±0.0001801   | 0.0223537 ±0.0056008   | 0.0028397 ±0.0067761   | 0.0423431 ±0.0053067   | 1.1331357 ±0.0156730   |
| 20F24307            | 17.0 % | 0.0045977 ±0.0001899   | 0.0269164 ±0.0051902   | 0.0045099 ±0.0071738   | 0.0320697 ±0.0056996   | 1.2305650 ±0.0157432   |
| 20F24308            | 17.0 % | 0.0045977 ±0.0001899   | 0.0269164 ±0.0051902   | 0.0045099 ±0.0071738   | 0.0320697 ±0.0056996   | 1.2305650 ±0.0157432   |
| 20F24310            | 17.0 % | 0.0046957 ±0.0001674   | 0.0192955 ±0.0060491   | 0.0008065 ±0.0066872   | 0.0276775 ±0.0060932   | 1.1658365 ±0.0163853   |
| 20F24311            | 17.0 % | 0.0046957 ±0.0001674   | 0.0192955 ±0.0060491   | 0.0008065 ±0.0066872   | 0.0276775 ±0.0060932   | 1.1658365 ±0.0163853   |
| 20F24313            | 17.0 % | 0.0045856 ±0.0001697   | 0.0153874 ±0.0054870   | 0.0031551 ±0.0069495   | 0.0087141 ±0.0066455   | 1.2359304 ±0.0149786   |
| 20F24314            | 17.0 % | 0.0045856 ±0.0001697   | 0.0153874 ±0.0054870   | 0.0031551 ±0.0069495   | 0.0087141 ±0.0066455   | 1.2359304 ±0.0149786   |
| 20F24316            | 17.0 % | 0.0051441 ±0.0001934   | 0.0134587 ±0.0058961   | 0.0052615 ±0.0062972   | 0.0024443 ±0.0061879   | 1.0906231 ±0.0150606   |
| 20F24317            | 17.0 % | 0.0051441 ±0.0001934   | 0.0134587 ±0.0058961   | 0.0052615 ±0.0062972   | 0.0024443 ±0.0061879   | 1.0906231 ±0.0150606   |
| 20F24319            | 17.0 % | 0.0051732 ±0.0001874   | 0.0159184 ±0.0060112   | 0.0008706 ±0.0067352   | 0.0078633 ±0.0062046   | 1.1422116 ±0.0157104   |
| 20F24320            | 17.0 % | 0.0051732 ±0.0001874   | 0.0159184 ±0.0060112   | 0.0008706 ±0.0067352   | 0.0078633 ±0.0062046   | 1.1422116 ±0.0157104   |
| 20F24322            | 17.0 % | 0.0047695 ±0.0001641   | 0.0188486 ±0.0058376   | 0.0043023 ±0.0064031   | 0.0289257 ±0.0066698   | 1.1846417 ±0.0153505   |
| 20F24323            | 17.0 % | 0.0047695 ±0.0001641   | 0.0188486 ±0.0058376   | 0.0043023 ±0.0064031   | 0.0289257 ±0.0066698   | 1.1846417 ±0.0153505   |
| 20F24325            | 17.0 % | 0.0057592 ±0.0001763   | 0.0242837 ±0.0050851   | 0.0050236 ±0.0068205   | 0.0101996 ±0.0064959   | 1.4341824 ±0.0159791   |
| 20F24326            | 17.0 % | 0.0057592 ±0.0001763   | 0.0242837 ±0.0050851   | 0.0050236 ±0.0068205   | 0.0101996 ±0.0064959   | 1.4341824 ±0.0159791   |
| 20F24328            | 17.0 % | 0.0048690 ±0.0001682   | 0.0162178 ±0.0055640   | 0.0046317 ±0.0066691   | 0.0101369 ±0.0059834   | 1.0333706 ±0.0175067   |
| 20F24329            | 17.0 % | 0.0048690 ±0.0001682   | 0.0162178 ±0.0055640   | 0.0046317 ±0.0066691   | 0.0101369 ±0.0059834   | 1.0333706 ±0.0175067   |

| Intercept Values |        | 36Ar ± 1σ (SE)<br>[fA] | r2     | Regression<br>(type,n) | 37Ar ± 1σ (SE)<br>[fA] | r2     | Regression<br>(type,n) | 38Ar ± 1σ (SE)<br>[fA] | r2     | Regression<br>(type,n) | 39Ar ± 1σ (SE)<br>[fA] | r2     | Regression<br>(type,n) | 40Ar ± 1σ (SE)<br>[fA] |
|------------------|--------|------------------------|--------|------------------------|------------------------|--------|------------------------|------------------------|--------|------------------------|------------------------|--------|------------------------|------------------------|
| 20F24286         | 17.0 % | 0.0274979 ±0.0003262   | 0.9005 | EXP 149 of 150         | 0.0695583 ±0.0061518   | 0.0108 | EXP 149 of 150         | 1.4487414 ±0.0063614   | 0.8451 | EXP 150 of 150         | 120.81804 ±0.01516     | 0.9999 | EXP 150 of 150         | 433.40097 ±0.02882     |
| 20F24287         | 17.0 % | 0.0321679 ±0.0003284   | 0.8836 | EXP 150 of 150         | 0.0714602 ±0.0057946   | 0.0157 | EXP 150 of 150         | 1.3445278 ±0.0061722   | 0.8296 | EXP 149 of 150         | 111.98022 ±0.01471     | 0.9998 | EXP 150 of 150         | 404.16984 ±0.03262     |
| 20F24289         | 17.0 % | 0.0225110 ±0.0002913   | 0.9333 | EXP 150 of 150         | 0.0807331 ±0.0049363   | 0.0670 | EXP 147 of 150         | 1.6449982 ±0.0067046   | 0.8630 | EXP 150 of 150         | 137.19840 ±0.01558     | 0.9999 | EXP 148 of 150         | 491.16008 ±0.03242     |
| 20F24290         | 17.0 % | 0.0092846 ±0.0002199   | 0.9669 | EXP 150 of 150         | 0.0722134 ±0.0058925   | 0.0151 | EXP 149 of 150         | 1.3891300 ±0.0073392   | 0.7944 | EXP 150 of 150         | 116.41347 ±0.01483     | 0.9999 | EXP 149 of 150         | 412.53413 ±0.02929     |
| 20F24292         | 17.0 % | 0.2333962 ±0.0007897   | 0.0022 | EXP 150 of 150         | 0.2761513 ±0.0061055   | 0.1259 | EXP 150 of 150         | 4.7119675 ±0.0071842   | 0.9792 | EXP 149 of 150         | 387.76921 ±0.02459     | 1.0000 | EXP 149 of 150         | 1439.60932 ±0.05582    |
| 20F24293         | 17.0 % | 0.0311692 ±0.0003521   | 0.9379 | EXP 150 of 150         | 0.1206240 ±0.0055065   | 0.0498 | EXP 150 of 150         | 2.2953069 ±0.0065960   | 0.9228 | EXP 150 of 150         | 191.41218 ±0.01892     | 0.9999 | EXP 150 of 150         | 684.52223 ±0.03874     |
| 20F24295         | 17.0 % | 0.0451543 ±0.0004195   | 0.9551 | EXP 150 of 150         | 0.2452558 ±0.0059945   | 0.1615 | EXP 150 of 150         | 4.3156258 ±0.0070745   | 0.9751 | EXP 150 of 150         | 360.25508 ±0.02374     | 1.0000 | EXP 150 of 150         | 1284.72374 ±0.05355    |
| 20F24296         | 17.0 % | 0.0735095 ±0.0004772   | 0.9585 | EXP 150 of 150         | 0.3222149 ±0.0057777   | 0.2503 | EXP 150 of 150         | 5.5508796 ±0.0073254   | 0.9839 | EXP 150 of 150         | 461.24871 ±0.02438     | 1.0000 | EXP 150 of 150         | 1650.40998 ±0.05355    |
| 20F24298         | 17.0 % | 0.2772155 ±0.0008316   | 0.7842 | EXP 150 of 150         | 0.1088958 ±0.0061171   | 0.0547 | EXP 150 of 150         | 1.8400244 ±0.0069966   | 0.8761 | EXP 150 of 150         | 148.26702 ±0.01601     | 0.9999 | EXP 150 of 150         | 607.15691 ±0.03933     |
| 20F24299         | 17.0 % | 0.0963787 ±0.0005317   | 0.6682 | EXP 150 of 150         | 0.1393963 ±0.0054889   | 0.0984 | EXP 148 of 150         | 2.4079740 ±0.0065746   | 0.9288 | EXP 148 of 150         | 201.07683 ±0.01698     | 0.9999 | EXP 150 of 150         | 737.98483 ±0.03774     |
| 20F24301         | 17.0 % | 0.0422383 ±0.0003749   | 0.9510 | EXP 146 of 150         | 0.1682339 ±0.0054604   | 0.1280 | EXP 150 of 150         | 3.3164544 ±0.0064651   | 0.9648 | EXP 150 of 150         | 274.43010 ±0.01800     | 1.0000 | EXP 150 of 150         | 979.80408 ±0.05028     |
| 20F24302         | 17.0 % | 0.0229136 ±0.0003450   | 0.9855 | EXP 148 of 150         | 0.3053160 ±0.0061699   | 0.1533 | EXP 150 of 150         | 5.6686314 ±0.0073661   | 0.9839 | EXP 150 of 150         | 472.93432 ±0.02750     | 1.0000 | EXP 150 of 150         | 1675.49588 ±0.05173    |
| 20F24304         | 17.0 % | 0.0491844 ±0.0003918   | 0.9513 | EXP 147 of 150         | 0.1858336 ±0.0056297   | 0.1075 | EXP 150 of 150         | 3.8192488 ±0.0061078   | 0.9760 | EXP 149 of 150         | 318.61348 ±0.02324     | 1.0000 | EXP 150 of 150         | 1137.87322 ±0.05253    |
| 20F24305         | 17.0 % | 0.0730566 ±0.0005068   | 0.9136 | EXP 150 of 150         | 0.2370661 ±0.0059779   | 0.1403 | EXP 150 of 150         | 3.8770103 ±0.0070010   | 0.9704 | EXP 150 of 150         | 322.25219 ±0.02114     | 1.0000 | EXP 148 of 150         | 1158.14456 ±0.04810    |
| 20F24307         | 17.0 % | 0.0633697 ±0.0004355   | 0.8215 | EXP 149 of 150         | 0.1077403 ±0.0058811   | 0.0376 | EXP 147 of 150         | 2.1041047 ±0.0065053   | 0.9201 | EXP 150 of 150         | 173.96393 ±0.01713     | 0.9999 | EXP 147 of 150         | 632.90617 ±0.03537     |
| 20F24308         | 17.0 % | 0.1353820 ±0.0005425   | 0.8998 | EXP 149 of 150         | 0.3052225 ±0.0054964   | 0.2297 | EXP 145 of 150         | 5.8208245 ±0.0074477   | 0.9845 | EXP 150 of 150         | 482.77224 ±0.02641     | 1.0000 | EXP 150 of 150         | 1746.62429 ±0.05384    |
| 20F24310         | 17.0 % | 0.2092677 ±0.0006500   | 0.0928 | EXP 150 of 150         | 0.1849985 ±0.0055202   | 0.1109 | EXP 150 of 150         | 3.1575313 ±0.0066931   | 0.9578 | EXP 150 of 150         | 260.61603 ±0.01711     | 1.0000 | EXP 146 of 150         | 982.92415 ±0.04580     |
| 20F24311         | 17.0 % | 0.0395556 ±0.0003569   | 0.9497 | EXP 150 of 150         | 0.1610264 ±0.0058797   | 0.0585 | EXP 149 of 150         | 2.7332923 ±0.0068312   | 0.9410 | EXP 150 of 150         | 228.53085 ±0.01984     | 0.9999 | EXP 150 of 150         | 817.71010 ±0.04332     |
| 20F24313         | 17.0 % | 0.0338459 ±0.0003209   | 0.9701 | EXP 148 of 150         | 0.1974228 ±0.0054510   | 0.1678 | EXP 150 of 150         | 3.5334365 ±0.0072213   | 0.9613 | EXP 150 of 150         | 293.26131 ±0.02198     | 0.9999 | EXP 148 of 150         | 1043.92040 ±0.04688    |
| 20F24314         | 17.0 % | 0.0481009 ±0.0004212   | 0.9598 | EXP 150 of 150         | 0.2478825 ±0.0059076   | 0.1801 | EXP 150 of 150         | 4.3436175 ±0.0072521   | 0.9730 | EXP 150 of 150         | 362.23886 ±0.02270     | 1.0000 | EXP 148 of 150         | 1292.95250 ±0.04934    |
| 20F24316         | 17.0 % | 0.0714368 ±0.0004549   | 0.8357 | EXP 149 of 150         | 0.1473952 ±0.0058165   | 0.0777 | EXP 150 of 150         | 2.5884535 ±0.0060715   | 0.9490 | EXP 150 of 150         | 216.08782 ±0.01610     | 1.0000 | EXP 145 of 150         | 783.84464 ±0.04001     |
| 20F24317         | 17.0 % | 0.0282419 ±0.0003133   | 0.9719 | EXP 147 of 150         | 0.1788785 ±0.0056637   | 0.0785 | EXP 149 of 150         | 3.3736044 ±0.0071318   | 0.9574 | EXP 150 of 150         | 280.73871 ±0.02125     | 0.9999 | EXP 149 of 150         | 998.75696 ±0.04791     |
| 20F24319         | 17.0 % | 0.0255949 ±0.0003542   | 0.9443 | EXP 150 of 150         | 0.1316260 ±0.0054562   | 0.0942 | EXP 150 of 150         | 2.4259860 ±0.0066433   | 0.9329 | EXP 150 of 150         | 203.27134 ±0.01646     | 0.9999 | EXP 150 of 150         | 724.40679 ±0.03839     |
| 20F24320         | 17.0 % | 0.0279300 ±0.0003243   | 0.9404 | EXP 148 of 150         | 0.1099257 ±0.0051917   | 0.0685 | EXP 146 of 150         | 1.9918395 ±0.0066619   | 0.8974 | EXP 150 of 150         | 165.56844 ±0.01711     | 0.9999 | EXP 149 of 150         | 592.05768 ±0.03765     |
| 20F24322         | 17.0 % | 0.0210237 ±0.0002703   | 0.9537 | EXP 150 of 150         | 0.0915001 ±0.0060620   | 0.0451 | EXP 150 of 150         | 1.8246336 ±0.0071129   | 0.8633 | EXP 149 of 150         | 151.01934 ±0.01631     | 0.9999 | EXP 146 of 150         | 538.66410 ±0.03421     |
| 20F24323         | 17.0 % | 0.1590423 ±0.0006035   | 0.0207 | EXP 150 of 150         | 0.1627347 ±0.0062728   | 0.0642 | EXP 147 of 150         | 2.8289684 ±0.0064137   | 0.9564 | EXP 149 of 150         | 231.74584 ±0.01849     | 0.9999 | EXP 148 of 150         | 864.57024 ±0.04595     |
| 20F24325         | 17.0 % | 0.0523621 ±0.0004129   | 0.9127 | EXP 150 of 150         | 0.1712787 ±0.0057893   | 0.1796 | EXP 148 of 150         | 2.8327081 ±0.0068527   | 0.9467 | EXP 149 of 150         | 235.62128 ±0.01749     | 1.0000 | EXP 148 of 150         | 845.42696 ±0.04340     |
| 20F24326         | 17.0 % | 0.0631081 ±0.0004835   | 0.9072 | EXP 150 of 150         | 0.1976362 ±0.0057310   | 0.1543 | EXP 150 of 150         | 3.5474910 ±0.0067591   | 0.9655 | EXP 148 of 150         | 295.68497 ±0.02556     | 0.9999 | EXP 150 of 150         | 1061.68610 ±0.04428    |
| 20F24328         | 17.0 % | 0.0625141 ±0.0004360   | 0.8577 | EXP 150 of 150         | 0.1347034 ±0.0055969   | 0.0307 | EXP 150 of 150         | 2.4273901 ±0.0061524   | 0.9426 | EXP 150 of 150         | 201.72618 ±0.01984     | 0.9999 | EXP 150 of 150         | 729.20194 ±0.03847     |
| 20F24329         | 17.0 % | 0.0818499 ±0.0004272   | 0.7893 | EXP 150 of 150         | 0.1570688 ±0.0055998   | 0.0726 | EXP 149 of 150         | 2.4937336 ±0.0068303   | 0.9322 | EXP 150 of 150         | 207.52680 ±0.01732     | 0.9999 | EXP 150 of 150         | 755.63282 ±0.04163     |

| r2     | Regression<br>(ttype,n) |            |
|--------|-------------------------|------------|
| 0.9999 | EXP                     | 150 of 150 |
| 0.9999 | EXP                     | 150 of 150 |
| 0.9999 | EXP                     | 149 of 150 |
| 0.9999 | EXP                     | 147 of 150 |
| 1.0000 | EXP                     | 150 of 150 |
| 1.0000 | EXP                     | 150 of 150 |
| 1.0000 | EXP                     | 150 of 150 |
| 1.0000 | EXP                     | 146 of 150 |
| 0.9999 | EXP                     | 150 of 150 |
| 1.0000 | EXP                     | 150 of 150 |
| 1.0000 | EXP                     | 148 of 150 |
| 1.0000 | EXP                     | 148 of 150 |
| 1.0000 | EXP                     | 150 of 150 |
| 1.0000 | EXP                     | 148 of 150 |
| 1.0000 | EXP                     | 148 of 150 |
| 1.0000 | EXP                     | 148 of 150 |
| 1.0000 | EXP                     | 150 of 150 |
| 1.0000 | EXP                     | 150 of 150 |
| 1.0000 | EXP                     | 148 of 150 |
| 1.0000 | EXP                     | 148 of 150 |
| 1.0000 | EXP                     | 148 of 150 |
| 1.0000 | EXP                     | 147 of 150 |
| 1.0000 | EXP                     | 149 of 150 |
| 1.0000 | EXP                     | 149 of 150 |
| 1.0000 | EXP                     | 150 of 150 |
| 0.9999 | EXP                     | 150 of 150 |
| 0.9999 | EXP                     | 147 of 150 |
| 1.0000 | EXP                     | 150 of 150 |
| 1.0000 | EXP                     | 149 of 150 |
| 1.0000 | EXP                     | 150 of 150 |
| 1.0000 | EXP                     | 150 of 150 |
| 1.0000 | EXP                     | 150 of 150 |

| Project Info |        | Analyst     | Irradiation | X-pos | Y-pos | Z/H-pos | Project                | Experiment | Nmb |
|--------------|--------|-------------|-------------|-------|-------|---------|------------------------|------------|-----|
| 20F24286     | 17.0 % | Dan Miggins | 20-OSU-01   | 0.00  | 0.00  | 6.37    | Oregon\Swenton (20-01) | 20F24282   | 01  |
| 20F24287     | 17.0 % | Dan Miggins | 20-OSU-01   | 0.00  | 0.00  | 6.37    | Oregon\Swenton (20-01) | 20F24282   | 01  |
| 20F24289     | 17.0 % | Dan Miggins | 20-OSU-01   | 0.00  | 0.00  | 6.37    | Oregon\Swenton (20-01) | 20F24282   | 01  |
| 20F24290     | 17.0 % | Dan Miggins | 20-OSU-01   | 0.00  | 0.00  | 6.37    | Oregon\Swenton (20-01) | 20F24282   | 01  |
| 20F24292     | 17.0 % | Dan Miggins | 20-OSU-01   | 0.00  | 0.00  | 6.37    | Oregon\Swenton (20-01) | 20F24282   | 01  |
| 20F24293     | 17.0 % | Dan Miggins | 20-OSU-01   | 0.00  | 0.00  | 6.37    | Oregon\Swenton (20-01) | 20F24282   | 01  |
| 20F24295     | 17.0 % | Dan Miggins | 20-OSU-01   | 0.00  | 0.00  | 6.37    | Oregon\Swenton (20-01) | 20F24282   | 01  |
| 20F24296     | 17.0 % | Dan Miggins | 20-OSU-01   | 0.00  | 0.00  | 6.37    | Oregon\Swenton (20-01) | 20F24282   | 01  |
| 20F24298     | 17.0 % | Dan Miggins | 20-OSU-01   | 0.00  | 0.00  | 6.37    | Oregon\Swenton (20-01) | 20F24282   | 01  |
| 20F24299     | 17.0 % | Dan Miggins | 20-OSU-01   | 0.00  | 0.00  | 6.37    | Oregon\Swenton (20-01) | 20F24282   | 01  |
| 20F24301     | 17.0 % | Dan Miggins | 20-OSU-01   | 0.00  | 0.00  | 6.37    | Oregon\Swenton (20-01) | 20F24282   | 01  |
| 20F24302     | 17.0 % | Dan Miggins | 20-OSU-01   | 0.00  | 0.00  | 6.37    | Oregon\Swenton (20-01) | 20F24282   | 01  |
| 20F24304     | 17.0 % | Dan Miggins | 20-OSU-01   | 0.00  | 0.00  | 6.37    | Oregon\Swenton (20-01) | 20F24282   | 01  |
| 20F24305     | 17.0 % | Dan Miggins | 20-OSU-01   | 0.00  | 0.00  | 6.37    | Oregon\Swenton (20-01) | 20F24282   | 01  |
| 20F24307     | 17.0 % | Dan Miggins | 20-OSU-01   | 0.00  | 0.00  | 6.37    | Oregon\Swenton (20-01) | 20F24282   | 01  |
| 20F24308     | 17.0 % | Dan Miggins | 20-OSU-01   | 0.00  | 0.00  | 6.37    | Oregon\Swenton (20-01) | 20F24282   | 01  |
| 20F24310     | 17.0 % | Dan Miggins | 20-OSU-01   | 0.00  | 0.00  | 6.37    | Oregon\Swenton (20-01) | 20F24282   | 01  |
| 20F24311     | 17.0 % | Dan Miggins | 20-OSU-01   | 0.00  | 0.00  | 6.37    | Oregon\Swenton (20-01) | 20F24282   | 01  |
| 20F24313     | 17.0 % | Dan Miggins | 20-OSU-01   | 0.00  | 0.00  | 6.37    | Oregon\Swenton (20-01) | 20F24282   | 01  |
| 20F24314     | 17.0 % | Dan Miggins | 20-OSU-01   | 0.00  | 0.00  | 6.37    | Oregon\Swenton (20-01) | 20F24282   | 01  |
| 20F24316     | 17.0 % | Dan Miggins | 20-OSU-01   | 0.00  | 0.00  | 6.37    | Oregon\Swenton (20-01) | 20F24282   | 01  |
| 20F24317     | 17.0 % | Dan Miggins | 20-OSU-01   | 0.00  | 0.00  | 6.37    | Oregon\Swenton (20-01) | 20F24282   | 01  |
| 20F24319     | 17.0 % | Dan Miggins | 20-OSU-01   | 0.00  | 0.00  | 6.37    | Oregon\Swenton (20-01) | 20F24282   | 01  |
| 20F24320     | 17.0 % | Dan Miggins | 20-OSU-01   | 0.00  | 0.00  | 6.37    | Oregon\Swenton (20-01) | 20F24282   | 01  |
| 20F24322     | 17.0 % | Dan Miggins | 20-OSU-01   | 0.00  | 0.00  | 6.37    | Oregon\Swenton (20-01) | 20F24282   | 01  |
| 20F24323     | 17.0 % | Dan Miggins | 20-OSU-01   | 0.00  | 0.00  | 6.37    | Oregon\Swenton (20-01) | 20F24282   | 01  |
| 20F24325     | 17.0 % | Dan Miggins | 20-OSU-01   | 0.00  | 0.00  | 6.37    | Oregon\Swenton (20-01) | 20F24282   | 01  |
| 20F24326     | 17.0 % | Dan Miggins | 20-OSU-01   | 0.00  | 0.00  | 6.37    | Oregon\Swenton (20-01) | 20F24282   | 01  |
| 20F24328     | 17.0 % | Dan Miggins | 20-OSU-01   | 0.00  | 0.00  | 6.37    | Oregon\Swenton (20-01) | 20F24282   | 01  |
| 20F24329     | 17.0 % | Dan Miggins | 20-OSU-01   | 0.00  | 0.00  | 6.37    | Oregon\Swenton (20-01) | 20F24282   | 01  |

| Sample Parameters |        | Sample   | Material | Location      | Standard Name   | Standard (in Ma) | %1σ   | Standard Reference  | Standard 40Ar/39Ar | %1σ   | J          | %1σ   | Air 40Ar/36Ar | %1σ   | MDF (lin) | %1σ   | Volume Ratio | Sensitivity (mol/volt) | Day | Month | Year | Hour | Min | Resist |
|-------------------|--------|----------|----------|---------------|-----------------|------------------|-------|---------------------|--------------------|-------|------------|-------|---------------|-------|-----------|-------|--------------|------------------------|-----|-------|------|------|-----|--------|
| 20F24286          | 17.0 % | VS17-020 | Sanidine | Rhyolite Dome | FCT-NM (1D6-20) | 28.201           | 0.082 | Kuiper et al (2008) | 9.38823            | 0.072 | 0.00165372 | 0.072 | 298.404       | 0.133 | 1.0001309 | 0.042 | 1            | 3.54E-14               | 6   | SEP   | 2020 | 19   | 37  | 1      |
| 20F24287          | 17.0 % | VS17-020 | Sanidine | Rhyolite Dome | FCT-NM (1D6-20) | 28.201           | 0.082 | Kuiper et al (2008) | 9.38823            | 0.072 | 0.00165372 | 0.072 | 298.404       | 0.133 | 1.0001309 | 0.042 | 1            | 3.54E-14               | 6   | SEP   | 2020 | 19   | 45  | 1      |
| 20F24289          | 17.0 % | VS17-020 | Sanidine | Rhyolite Dome | FCT-NM (1D6-20) | 28.201           | 0.082 | Kuiper et al (2008) | 9.38823            | 0.072 | 0.00165372 | 0.072 | 298.404       | 0.133 | 1.0001309 | 0.042 | 1            | 3.54E-14               | 6   | SEP   | 2020 | 20   | 2   | 1      |
| 20F24290          | 17.0 % | VS17-020 | Sanidine | Rhyolite Dome | FCT-NM (1D6-20) | 28.201           | 0.082 | Kuiper et al (2008) | 9.38823            | 0.072 | 0.00165372 | 0.072 | 298.404       | 0.133 | 1.0001309 | 0.042 | 1            | 3.54E-14               | 6   | SEP   | 2020 | 20   | 11  | 1      |
| 20F24292          | 17.0 % | VS17-020 | Sanidine | Rhyolite Dome | FCT-NM (1D6-20) | 28.201           | 0.082 | Kuiper et al (2008) | 9.38823            | 0.072 | 0.00165372 | 0.072 | 298.404       | 0.133 | 1.0001309 | 0.042 | 1            | 3.54E-14               | 6   | SEP   | 2020 | 20   | 28  | 1      |
| 20F24293          | 17.0 % | VS17-020 | Sanidine | Rhyolite Dome | FCT-NM (1D6-20) | 28.201           | 0.082 | Kuiper et al (2008) | 9.38823            | 0.072 | 0.00165372 | 0.072 | 298.404       | 0.133 | 1.0001309 | 0.042 | 1            | 3.54E-14               | 6   | SEP   | 2020 | 20   | 37  | 1      |
| 20F24295          | 17.0 % | VS17-020 | Sanidine | Rhyolite Dome | FCT-NM (1D6-20) | 28.201           | 0.082 | Kuiper et al (2008) | 9.38823            | 0.072 | 0.00165372 | 0.072 | 298.404       | 0.133 | 1.0001309 | 0.042 | 1            | 3.54E-14               | 6   | SEP   | 2020 | 20   | 54  | 1      |
| 20F24296          | 17.0 % | VS17-020 | Sanidine | Rhyolite Dome | FCT-NM (1D6-20) | 28.201           | 0.082 | Kuiper et al (2008) | 9.38823            | 0.072 | 0.00165372 | 0.072 | 298.404       | 0.133 | 1.0001309 | 0.042 | 1            | 3.54E-14               | 6   | SEP   | 2020 | 21   | 3   | 1      |
| 20F24298          | 17.0 % | VS17-020 | Sanidine | Rhyolite Dome | FCT-NM (1D6-20) | 28.201           | 0.082 | Kuiper et al (2008) | 9.38823            | 0.072 | 0.00165372 | 0.072 | 298.404       | 0.133 | 1.0001309 | 0.042 | 1            | 3.54E-14               | 6   | SEP   | 2020 | 21   | 20  | 1      |
| 20F24299          | 17.0 % | VS17-020 | Sanidine | Rhyolite Dome | FCT-NM (1D6-20) | 28.201           | 0.082 | Kuiper et al (2008) | 9.38823            | 0.072 | 0.00165372 | 0.072 | 298.404       | 0.133 | 1.0001309 | 0.042 | 1            | 3.54E-14               | 6   | SEP   | 2020 | 21   | 28  | 1      |
| 20F24301          | 17.0 % | VS17-020 | Sanidine | Rhyolite Dome | FCT-NM (1D6-20) | 28.201           | 0.082 | Kuiper et al (2008) | 9.38823            | 0.072 | 0.00165372 | 0.072 | 298.404       | 0.133 | 1.0001309 | 0.042 | 1            | 3.54E-14               | 6   | SEP   | 2020 | 21   | 46  | 1      |
| 20F24302          | 17.0 % | VS17-020 | Sanidine | Rhyolite Dome | FCT-NM (1D6-20) | 28.201           | 0.082 | Kuiper et al (2008) | 9.38823            | 0.072 | 0.00165372 | 0.072 | 298.404       | 0.133 | 1.0001309 | 0.042 | 1            | 3.54E-14               | 6   | SEP   | 2020 | 21   | 54  | 1      |
| 20F24304          | 17.0 % | VS17-020 | Sanidine | Rhyolite Dome | FCT-NM (1D6-20) | 28.201           | 0.082 | Kuiper et al (2008) | 9.38823            | 0.072 | 0.00165372 | 0.072 | 298.404       | 0.133 | 1.0001309 | 0.042 | 1            | 3.54E-14               | 6   | SEP   | 2020 | 22   | 11  | 1      |
| 20F24305          | 17.0 % | VS17-020 | Sanidine | Rhyolite Dome | FCT-NM (1D6-20) | 28.201           | 0.082 | Kuiper et al (2008) | 9.38823            | 0.072 | 0.00165372 | 0.072 | 298.404       | 0.133 | 1.0001309 | 0.042 | 1            | 3.54E-14               | 6   | SEP   | 2020 | 22   | 20  | 1      |
| 20F24307          | 17.0 % | VS17-020 | Sanidine | Rhyolite Dome | FCT-NM (1D6-20) | 28.201           | 0.082 | Kuiper et al (2008) | 9.38823            | 0.072 | 0.00165372 | 0.072 | 298.404       | 0.133 | 1.0001309 | 0.042 | 1            | 3.54E-14               | 6   | SEP   | 2020 | 22   | 37  | 1      |
| 20F24308          | 17.0 % | VS17-020 | Sanidine | Rhyolite Dome | FCT-NM (1D6-20) | 28.201           | 0.082 | Kuiper et al (2008) | 9.38823            | 0.072 | 0.00165372 | 0.072 | 298.404       | 0.133 | 1.0001309 | 0.042 | 1            | 3.54E-14               | 6   | SEP   | 2020 | 22   | 46  | 1      |
| 20F24310          | 17.0 % | VS17-020 | Sanidine | Rhyolite Dome | FCT-NM (1D6-20) | 28.201           | 0.082 | Kuiper et al (2008) | 9.38823            | 0.072 | 0.00165372 | 0.072 | 298.404       | 0.133 | 1.0001309 | 0.042 | 1            | 3.54E-14               | 6   | SEP   | 2020 | 23   | 3   | 1      |
| 20F24311          | 17.0 % | VS17-020 | Sanidine | Rhyolite Dome | FCT-NM (1D6-20) | 28.201           | 0.082 | Kuiper et al (2008) | 9.38823            | 0.072 | 0.00165372 | 0.072 | 298.404       | 0.133 | 1.0001309 | 0.042 | 1            | 3.54E-14               | 6   | SEP   | 2020 | 23   | 11  | 1      |
| 20F24313          | 17.0 % | VS17-020 | Sanidine | Rhyolite Dome | FCT-NM (1D6-20) | 28.201           | 0.082 | Kuiper et al (2008) | 9.38823            | 0.072 | 0.00165372 | 0.072 | 298.404       | 0.133 | 1.0001309 | 0.042 | 1            | 3.54E-14               | 6   | SEP   | 2020 | 23   | 29  | 1      |
| 20F24314          | 17.0 % | VS17-020 | Sanidine | Rhyolite Dome | FCT-NM (1D6-20) | 28.201           | 0.082 | Kuiper et al (2008) | 9.38823            | 0.072 | 0.00165372 | 0.072 | 298.404       | 0.133 | 1.0001309 | 0.042 | 1            | 3.54E-14               | 6   | SEP   | 2020 | 23   | 37  | 1      |
| 20F24316          | 17.0 % | VS17-020 | Sanidine | Rhyolite Dome | FCT-NM (1D6-20) | 28.201           | 0.082 | Kuiper et al (2008) | 9.38823            | 0.072 | 0.00165372 | 0.072 | 298.404       | 0.133 | 1.0001309 | 0.042 | 1            | 3.54E-14               | 6   | SEP   | 2020 | 23   | 54  | 1      |
| 20F24317          | 17.0 % | VS17-020 | Sanidine | Rhyolite Dome | FCT-NM (1D6-20) | 28.201           | 0.082 | Kuiper et al (2008) | 9.38823            | 0.072 | 0.00165372 | 0.072 | 298.404       | 0.133 | 1.0001309 | 0.042 | 1            | 3.54E-14               | 7   | SEP   | 2020 | 0    | 3   | 1      |
| 20F24319          | 17.0 % | VS17-020 | Sanidine | Rhyolite Dome | FCT-NM (1D6-20) | 28.201           | 0.082 | Kuiper et al (2008) | 9.38823            | 0.072 | 0.00165372 | 0.072 | 298.404       | 0.133 | 1.0001309 | 0.042 | 1            | 3.54E-14               | 7   | SEP   | 2020 | 0    | 20  | 1      |
| 20F24320          | 17.0 % | VS17-020 | Sanidine | Rhyolite Dome | FCT-NM (1D6-20) | 28.201           | 0.082 | Kuiper et al (2008) | 9.38823            | 0.072 | 0.00165372 | 0.072 | 298.404       | 0.133 | 1.0001309 | 0.042 | 1            | 3.54E-14               | 7   | SEP   | 2020 | 0    | 29  | 1      |
| 20F24322          | 17.0 % | VS17-020 | Sanidine | Rhyolite Dome | FCT-NM (1D6-20) | 28.201           | 0.082 | Kuiper et al (2008) | 9.38823            | 0.072 | 0.00165372 | 0.072 | 298.404       | 0.133 | 1.0001309 | 0.042 | 1            | 3.54E-14               | 7   | SEP   | 2020 | 0    | 46  | 1      |
| 20F24323          | 17.0 % | VS17-020 | Sanidine | Rhyolite Dome | FCT-NM (1D6-20) | 28.201           | 0.082 | Kuiper et al (2008) | 9.38823            | 0.072 | 0.00165372 | 0.072 | 298.404       | 0.133 | 1.0001309 | 0.042 | 1            | 3.54E-14               | 7   | SEP   | 2020 | 0    | 54  | 1      |
| 20F24325          | 17.0 % | VS17-020 | Sanidine | Rhyolite Dome | FCT-NM (1D6-20) | 28.201           | 0.082 | Kuiper et al (2008) | 9.38823            | 0.072 | 0.00165372 | 0.072 | 298.404       | 0.133 | 1.0001309 | 0.042 | 1            | 3.54E-14               | 7   | SEP   | 2020 | 1    | 12  | 1      |
| 20F24326          | 17.0 % | VS17-020 | Sanidine | Rhyolite Dome | FCT-NM (1D6-20) | 28.201           | 0.082 | Kuiper et al (2008) | 9.38823            | 0.072 | 0.00165372 | 0.072 | 298.404       | 0.133 | 1.0001309 | 0.042 | 1            | 3.54E-14               | 7   | SEP   | 2020 | 1    | 20  | 1      |
| 20F24328          | 17.0 % | VS17-020 | Sanidine | Rhyolite Dome | FCT-NM (1D6-20) | 28.201           | 0.082 | Kuiper et al (2008) | 9.38823            | 0.072 | 0.00165372 | 0.072 | 298.404       | 0.133 | 1.0001309 | 0.042 | 1            | 3.54E-14               | 7   | SEP   | 2020 | 1    | 37  | 1      |
| 20F24329          | 17.0 % | VS17-020 | Sanidine | Rhyolite Dome | FCT-NM (1D6-20) | 28.201           | 0.082 | Kuiper et al (2008) | 9.38823            | 0.072 | 0.00165372 | 0.072 | 298.404       | 0.133 | 1.0001309 | 0.042 | 1            | 3.54E-14               | 7   | SEP   | 2020 | 1    | 46  | 1      |



20F24282.AGE >>> VS17-020 >>> OREGON | SWENTON (20-01) PROJECT

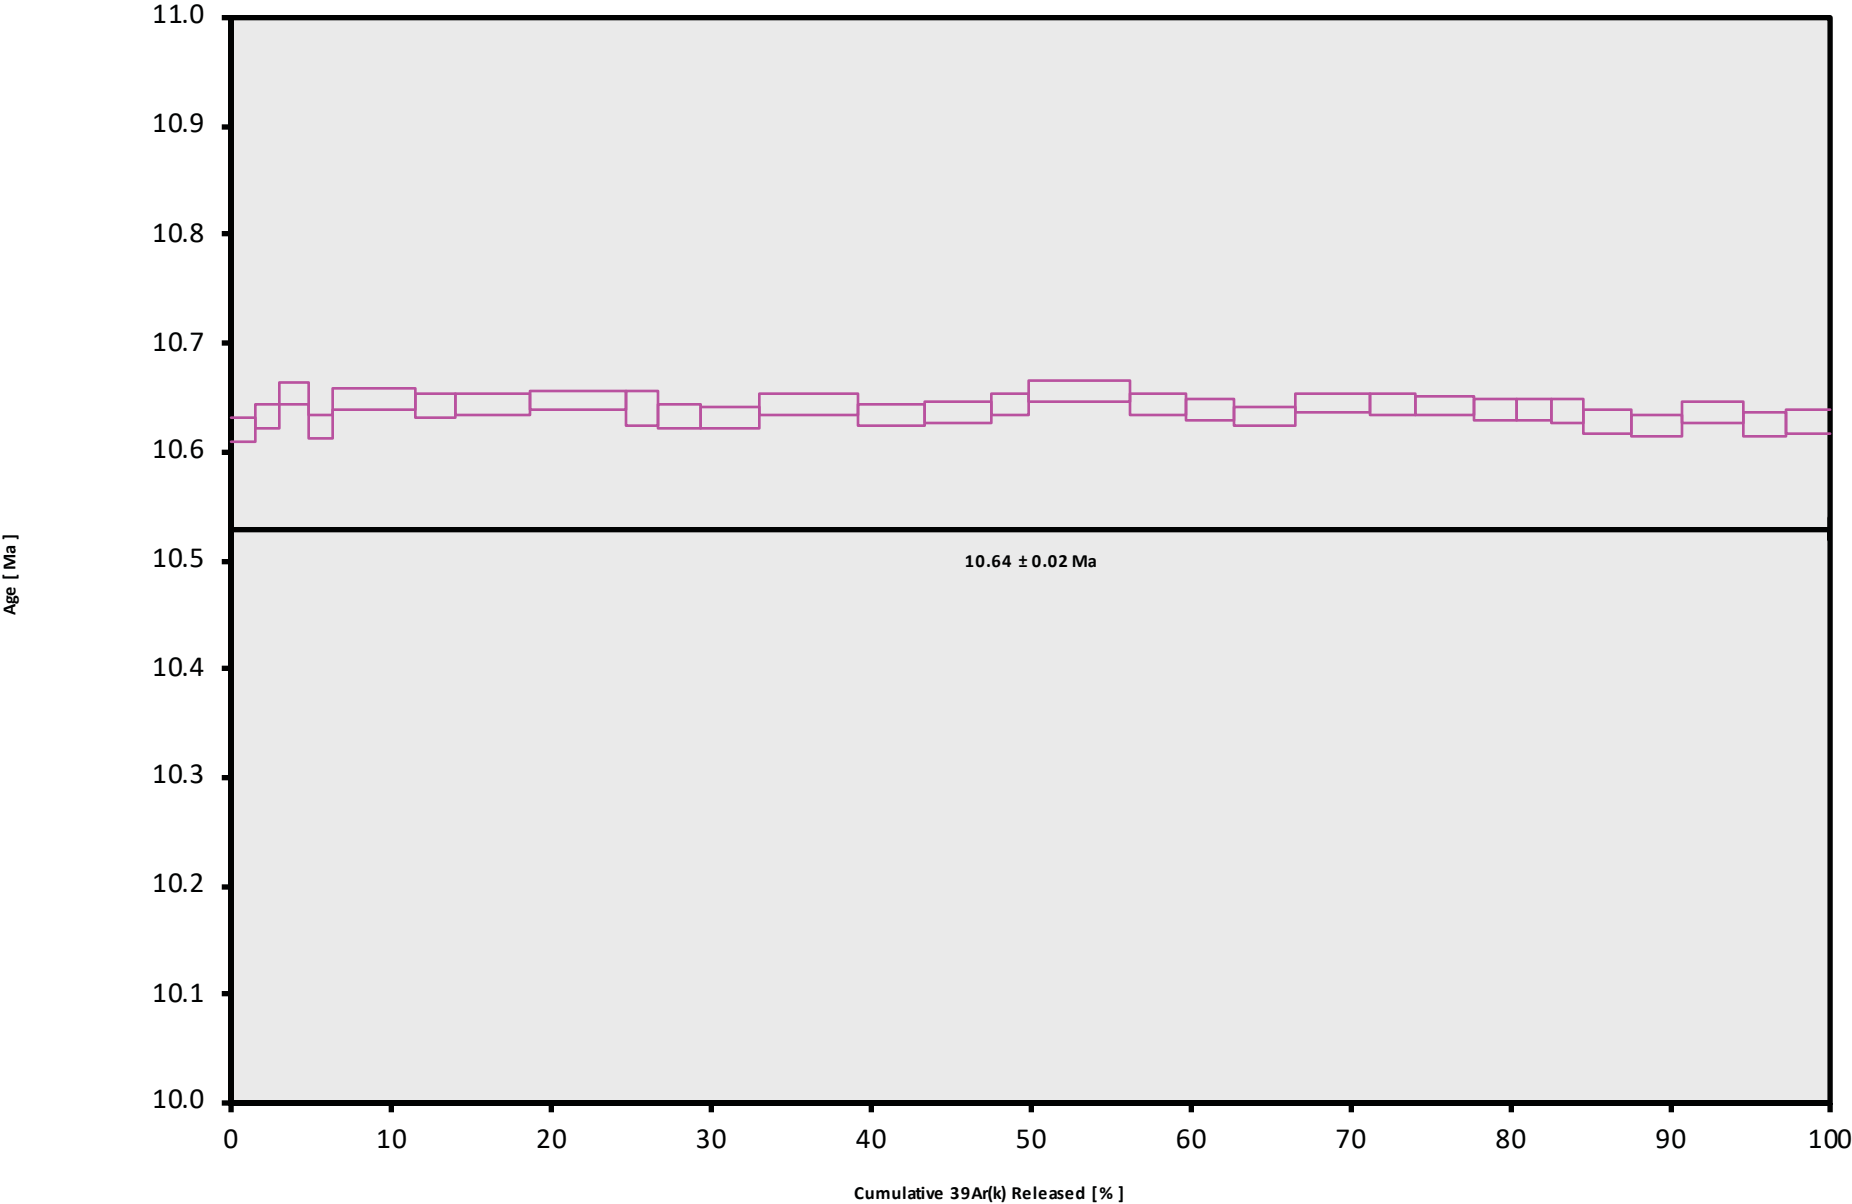

Ar-Ages in Ma

WEIGHTED PLATEAU

10.64 ± 0.02

TOTAL FUSION

10.64 ± 0.02

NORMAL ISOCHRON

10.64 ± 0.02

INVERSE ISOCHRON

10.64 ± 0.02

MSWD (PROBABILITY)

3.08 (0%)

Sample Info

Sanidine

Rhyolite Dome

Dan Miggins

IRR = 20-OSU-01 (1D6-20)



20F24282.AGE >>> VS17-020 >>> OREGON | SWENTON (20-01) PROJECT

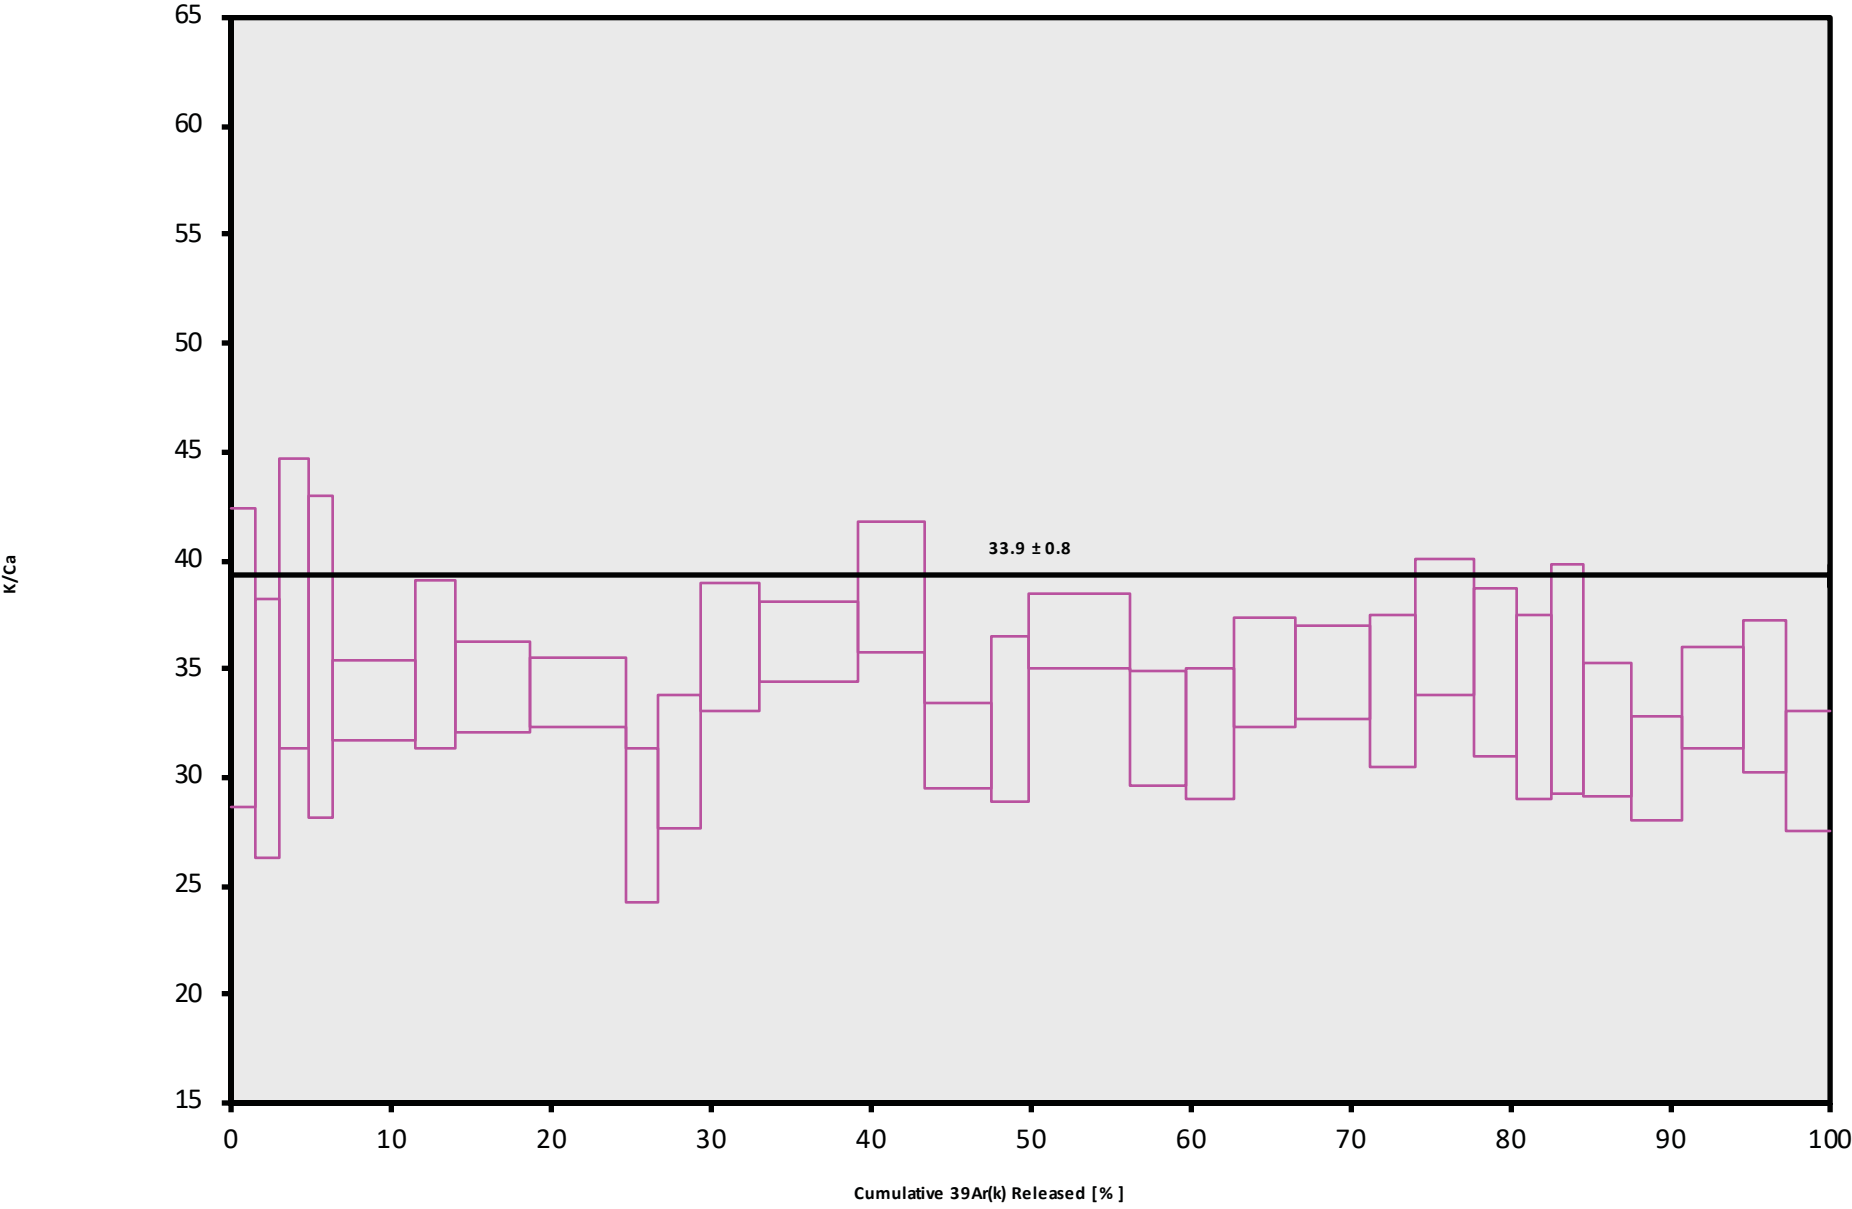

Ar-Ages in Ma

WEIGHTED PLATEAU

$10.64 \pm 0.02$

TOTAL FUSION

$10.64 \pm 0.02$

NORMAL ISOCHRON

$10.64 \pm 0.02$

INVERSE ISOCHRON

$10.64 \pm 0.02$

Sample Info

Sanidine

Rhyolite Dome

Dan Miggins

IRR = 20-OSU-01 (1D6-20)

20F24282.AGE >>> VS17-020 >>> OREGON | SWENTON (20-01) PROJECT

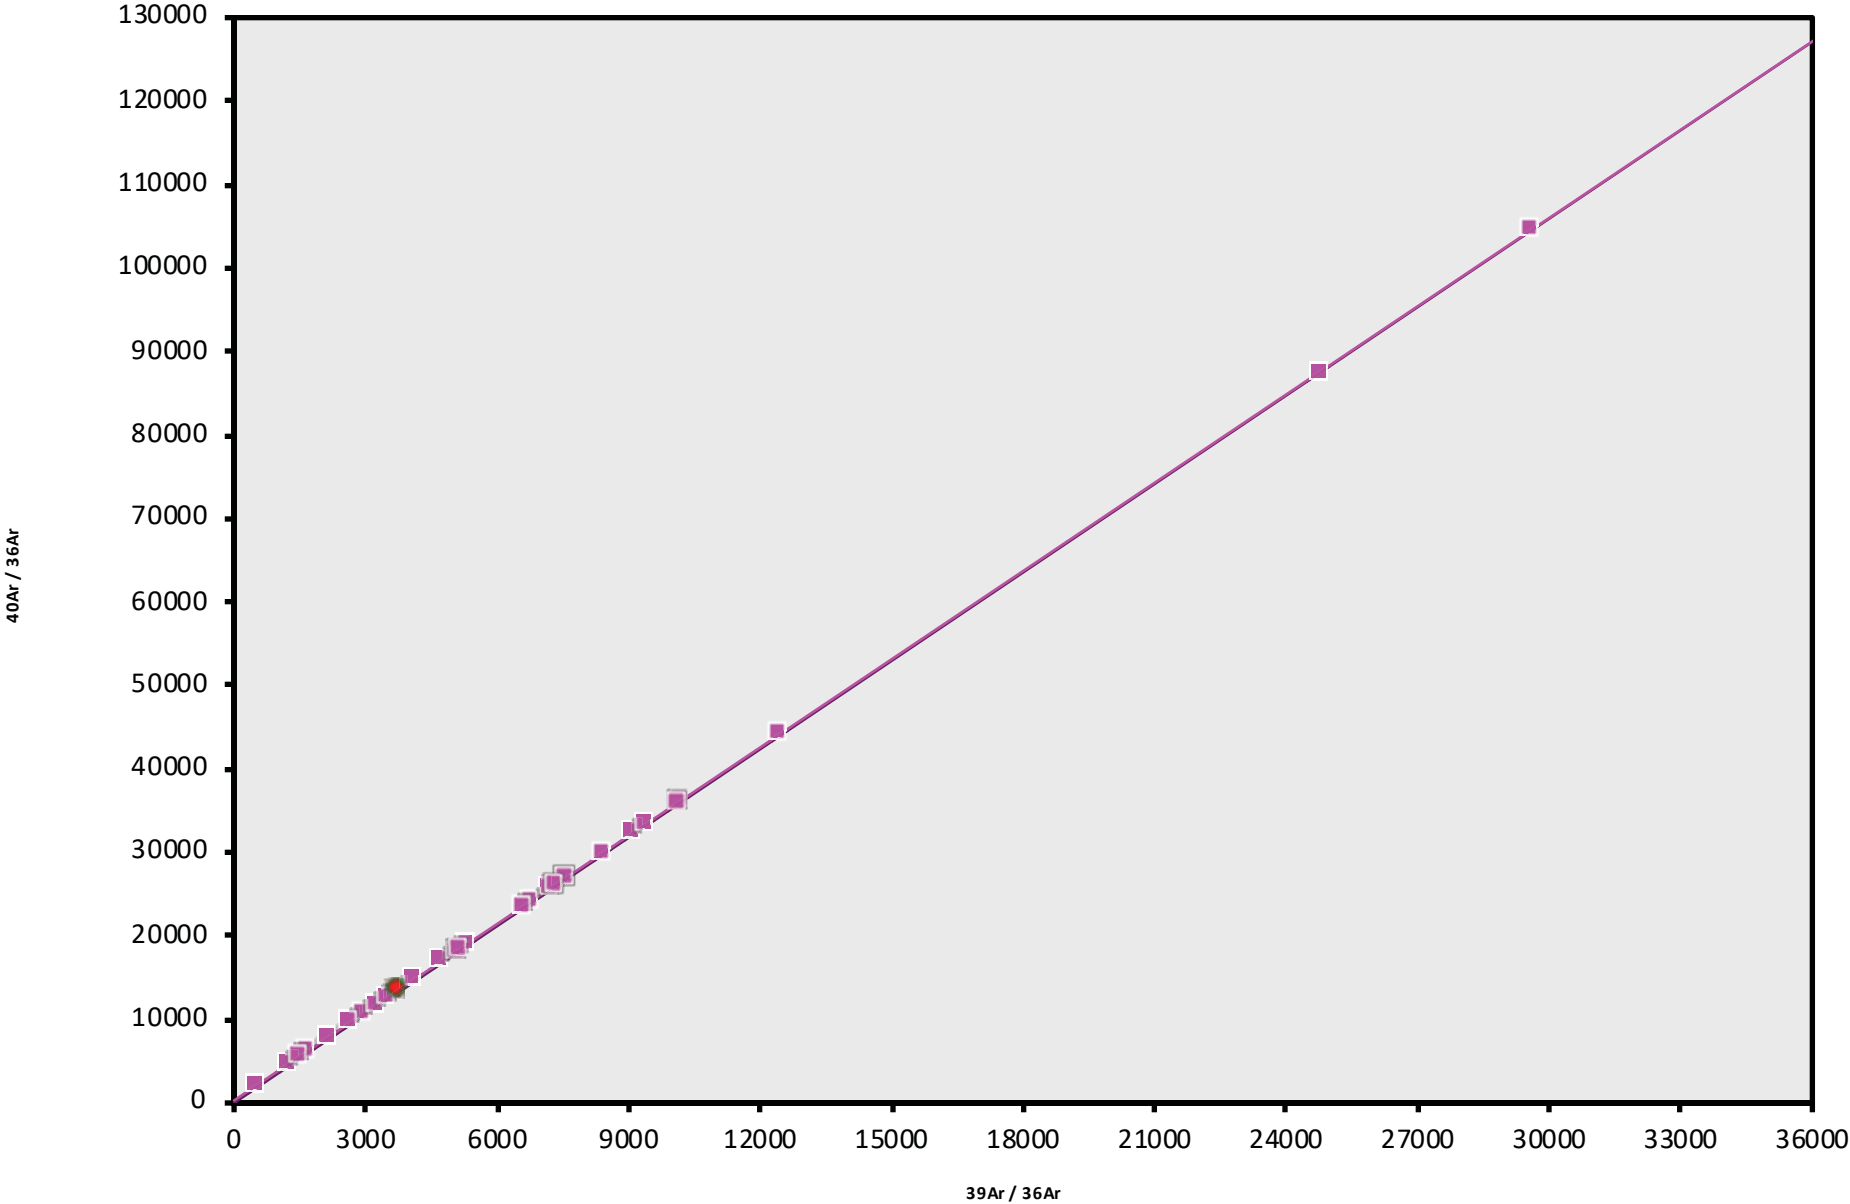

Ar-Ages in Ma

WEIGHTED PLATEAU

$10.64 \pm 0.02$

TOTAL FUSION

$10.64 \pm 0.02$

NORMAL ISOCHRON

$10.64 \pm 0.02$

INVERSE ISOCHRON

$10.64 \pm 0.02$

MSWD (PROBABILITY)

3.30 (0%)

40AR/36AR INTERCEPT

Sample Info

Sanidine

Rhyolite Dome

Dan Miggins

IRR = 20-OSU-01 (1D6-20)

20F24282.AGE >>> VS17-020 >>> OREGON | SWENTON (20-01) PROJECT

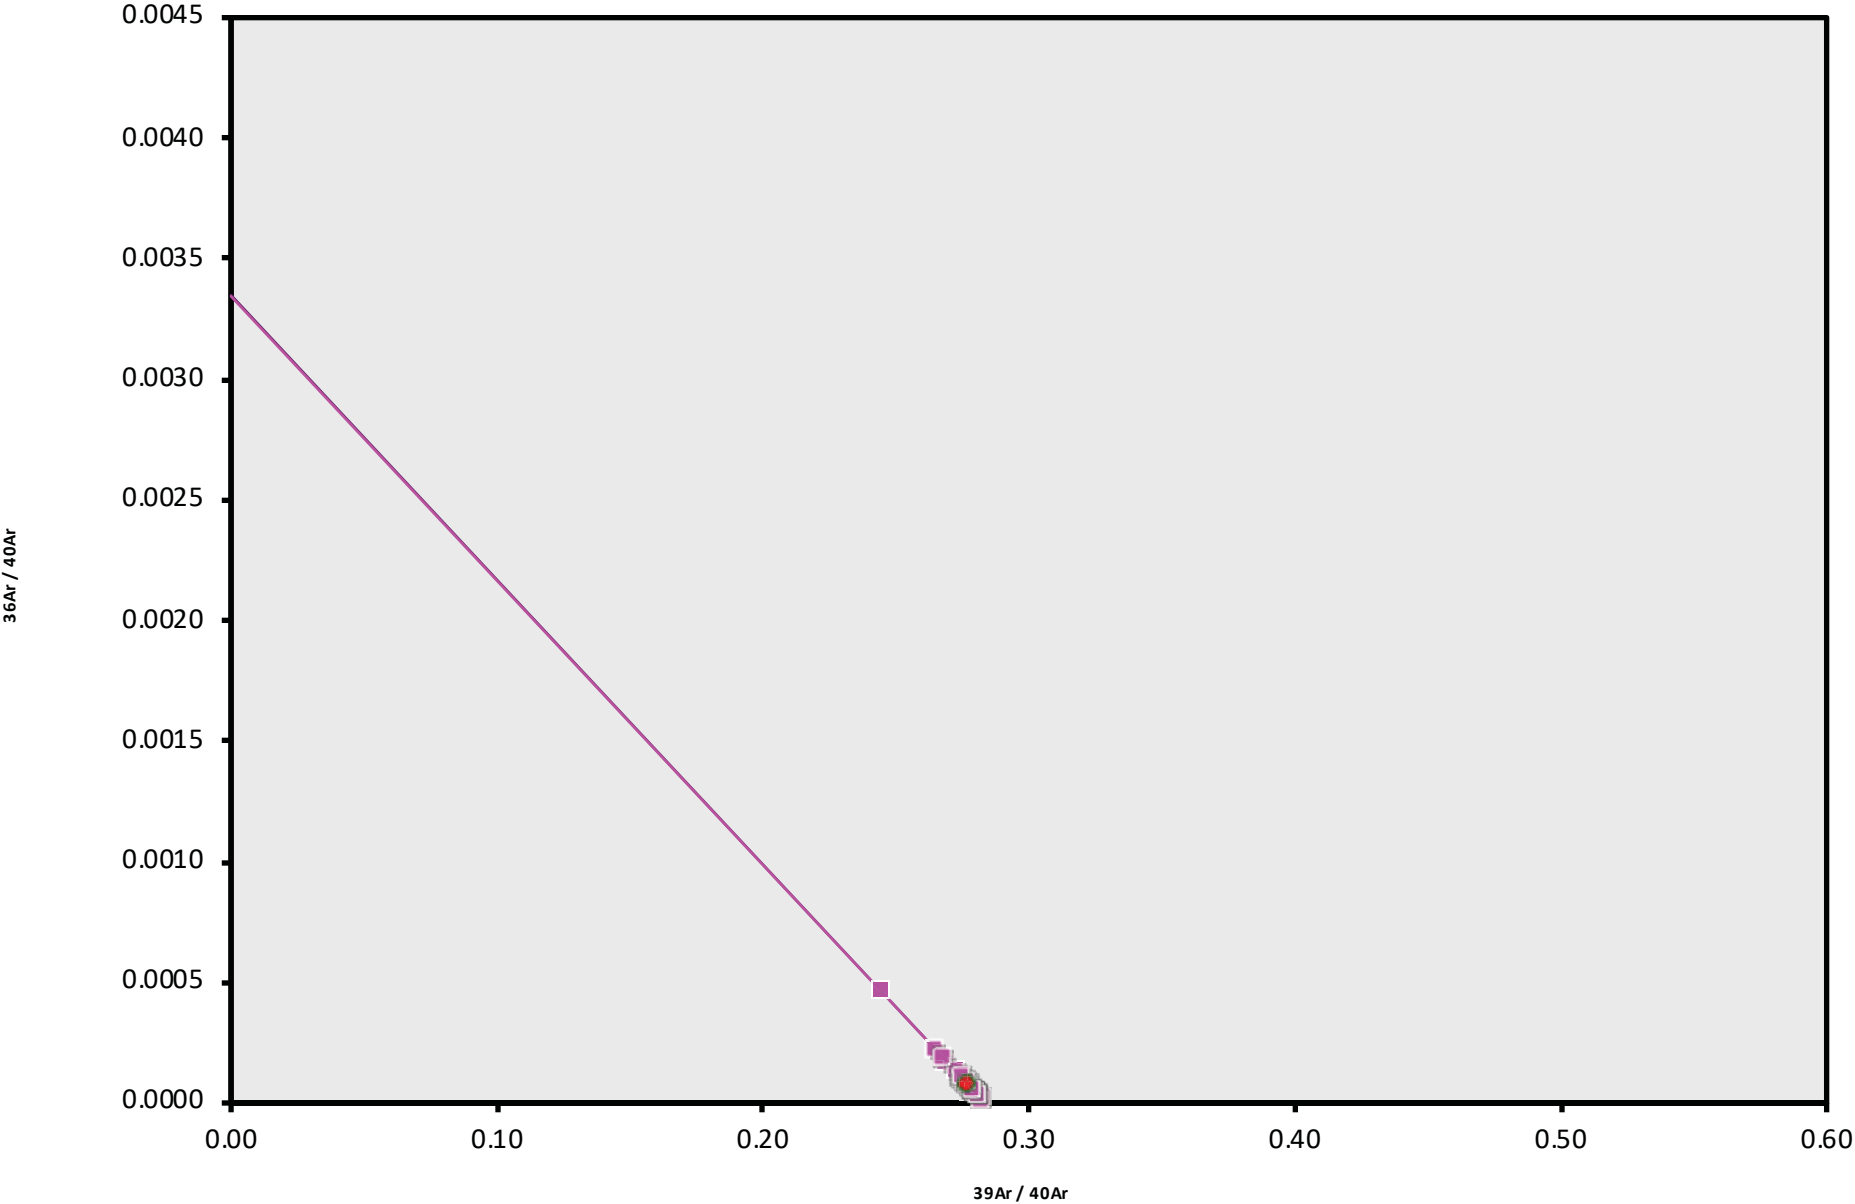

Ar-Ages in Ma

WEIGHTED PLATEAU

$10.64 \pm 0.02$

TOTAL FUSION

$10.64 \pm 0.02$

NORMAL ISOCHRON

$10.64 \pm 0.02$

INVERSE ISOCHRON

$10.64 \pm 0.02$

MSWD (PROBABILITY)

3.19 (0%)

SPREADING FACTOR

Sample Info

Sanidine

Rhyolite Dome

Dan Miggins

IRR = 20-OSU-01 (1D6-20)

| Relative Abundances |        |   | 36Ar<br>[fA] | %1σ     | 37Ar<br>[fA] | %1σ   | 38Ar<br>[fA] | %1σ   | 39Ar<br>[fA] | %1σ   | 40Ar<br>[fA] | %1σ   |
|---------------------|--------|---|--------------|---------|--------------|-------|--------------|-------|--------------|-------|--------------|-------|
| 20F11214            | 17.0 % | ✓ | 0.0020133    | 15.681  | 2.539589     | 0.741 | 1.607633     | 0.561 | 133.4125     | 0.046 | 510.316      | 0.007 |
| 20F11215            | 17.0 % | ✓ | 0.0035204    | 9.307   | 3.326039     | 0.572 | 2.179655     | 0.432 | 181.7418     | 0.045 | 695.027      | 0.007 |
| 20F11217            | 17.0 % | ✓ | 0.0019041    | 16.203  | 1.930523     | 1.027 | 1.224887     | 0.716 | 101.6490     | 0.046 | 388.565      | 0.009 |
| 20F11218            | 17.0 % | ✓ | 0.0149933    | 2.488   | 4.205297     | 0.475 | 2.599408     | 0.353 | 216.7358     | 0.045 | 832.231      | 0.006 |
| 20F11220            | 17.0 % | ✓ | 0.0106758    | 3.244   | 3.130859     | 0.589 | 2.083842     | 0.479 | 172.6764     | 0.045 | 662.071      | 0.006 |
| 20F11221            | 17.0 % | ✓ | 0.0021255    | 14.857  | 3.279011     | 0.590 | 2.000140     | 0.516 | 167.1042     | 0.045 | 639.102      | 0.007 |
| 20F11223            | 17.0 % | ✓ | 0.0059948    | 5.324   | 3.518068     | 0.520 | 2.104615     | 0.392 | 173.8787     | 0.045 | 665.455      | 0.006 |
| 20F11224            | 17.0 % | ✓ | 0.0019416    | 15.068  | 2.447618     | 0.753 | 1.619552     | 0.545 | 134.5533     | 0.046 | 513.936      | 0.007 |
| 20F11226            | 17.0 % | ✓ | 0.0053823    | 5.783   | 2.745080     | 0.735 | 1.819540     | 0.527 | 153.1529     | 0.045 | 586.124      | 0.007 |
| 20F11227            | 17.0 % | ✓ | 0.0074307    | 4.287   | 2.675158     | 0.813 | 1.458098     | 0.643 | 121.0852     | 0.046 | 463.794      | 0.008 |
| 20F11229            | 17.0 % | ✓ | 0.0042278    | 7.667   | 2.421681     | 0.811 | 1.593704     | 0.627 | 132.9591     | 0.046 | 509.289      | 0.007 |
| 20F11230            | 17.0 % | ✓ | 0.0051373    | 6.533   | 2.745718     | 0.687 | 1.683590     | 0.620 | 141.1313     | 0.045 | 540.649      | 0.007 |
| 20F11232            | 17.0 % | ✓ | 0.0025263    | 11.166  | 2.408487     | 0.869 | 1.445887     | 0.643 | 120.2064     | 0.046 | 459.640      | 0.008 |
| 20F11233            | 17.0 % | ✓ | 0.0011593    | 27.098  | 2.752988     | 0.708 | 1.763232     | 0.533 | 145.2889     | 0.045 | 555.314      | 0.007 |
| 20F11235            | 17.0 % | ✓ | 0.0027194    | 10.340  | 2.591380     | 0.752 | 1.525240     | 0.603 | 128.6386     | 0.046 | 492.020      | 0.007 |
| 20F11236            | 17.0 % | ✓ | 0.0043984    | 7.601   | 2.307777     | 0.868 | 1.350080     | 0.713 | 111.9623     | 0.046 | 428.989      | 0.008 |
| 20F11238            | 17.0 % | ✓ | 0.0053641    | 6.149   | 2.915322     | 0.626 | 1.710566     | 0.567 | 142.8220     | 0.045 | 547.204      | 0.007 |
| 20F11239            | 17.0 % | ✓ | 0.0007483    | 37.237  | 1.994216     | 0.910 | 1.221432     | 0.803 | 101.8465     | 0.046 | 389.028      | 0.009 |
| 20F11241            | 17.0 % | ✓ | 0.0004940    | 61.440  | 1.328208     | 1.481 | 0.838939     | 1.149 | 69.7040      | 0.047 | 266.011      | 0.012 |
| 20F11242            | 17.0 % | ✓ | 0.0006503    | 46.051  | 1.364430     | 1.452 | 0.925031     | 1.073 | 77.4970      | 0.047 | 296.450      | 0.011 |
| 20F11244            | 17.0 % | ✓ | 0.0011285    | 27.444  | 1.671069     | 1.161 | 0.986516     | 1.008 | 82.3248      | 0.047 | 315.027      | 0.010 |
| 20F11245            | 17.0 % | ✓ | 0.0018025    | 17.612  | 2.125244     | 0.915 | 1.392119     | 0.619 | 116.5905     | 0.046 | 445.827      | 0.008 |
| 20F11247            | 17.0 % | ✓ | 0.0056060    | 5.969   | 1.949754     | 1.015 | 1.223411     | 0.681 | 101.7322     | 0.047 | 390.766      | 0.008 |
| 20F11248            | 17.0 % | ✓ | 0.0002810    | 104.850 | 1.714107     | 1.127 | 1.271091     | 0.718 | 106.8046     | 0.046 | 408.283      | 0.008 |
| 20F11250            | 17.0 % | ✓ | 0.0075517    | 4.014   | 2.089010     | 0.948 | 1.277422     | 0.730 | 106.7628     | 0.046 | 410.146      | 0.009 |
| 20F11251            | 17.0 % | ✓ | 0.0001855    | 163.306 | 2.234553     | 0.885 | 1.302627     | 0.695 | 109.2710     | 0.046 | 417.038      | 0.009 |
| 20F11253            | 17.0 % | ✓ | 0.0000345    | 811.320 | 1.360354     | 1.389 | 0.830652     | 1.050 | 70.2256      | 0.048 | 267.876      | 0.012 |
| 20F11254            | 17.0 % |   | 0.0002640    | 108.808 | 1.251884     | 1.514 | 0.830434     | 1.155 | 71.3709      | 0.048 | 273.435      | 0.012 |
| 20F11256            | 17.0 % | ✓ | 0.0030663    | 10.276  | 1.978262     | 0.955 | 1.274372     | 0.806 | 105.9486     | 0.046 | 405.320      | 0.008 |
| 20F11257            | 17.0 % | ✓ | 0.0054871    | 5.843   | 2.898345     | 0.669 | 1.806635     | 0.565 | 151.3519     | 0.045 | 579.527      | 0.006 |
| Σ                   |        |   | 0.1072843    | 1.599   | 71.900030    | 0.148 | 44.950349    | 0.115 | 3750.4287    | 0.009 | 14354.463    | 0.001 |

| Information on Analysis<br>and Constants Used in Calculations                                                                                                                                                                                                                                                                                                                                                                                                                                                                                                                                                                                                                                                                                                                                                                                                                                                                                                                                                                                                                                                                                                                                                                                    | Results                                                                                                                                                                                                                                                     |
|--------------------------------------------------------------------------------------------------------------------------------------------------------------------------------------------------------------------------------------------------------------------------------------------------------------------------------------------------------------------------------------------------------------------------------------------------------------------------------------------------------------------------------------------------------------------------------------------------------------------------------------------------------------------------------------------------------------------------------------------------------------------------------------------------------------------------------------------------------------------------------------------------------------------------------------------------------------------------------------------------------------------------------------------------------------------------------------------------------------------------------------------------------------------------------------------------------------------------------------------------|-------------------------------------------------------------------------------------------------------------------------------------------------------------------------------------------------------------------------------------------------------------|
| <div>Project = <b>SWENTON (18-58)</b></div> <div>Sample = <b>VS17-034</b></div> <div>Material = <b>Sanidine</b></div> <div>Location = <b>Stockade Mountain</b></div> <div>Region = <b>Eastern Oregon</b></div> <div>Analyst = <b>Dan Miggins</b></div> <div>Irradiation = <b>20-OSU-01 (1C28-20)</b></div> <div>Position = <b>X: 0   Y: 0   Z/H: 37.95312 mm</b></div> <div>FCT-NM Age = <b>28.201 ± 0.023 Ma</b></div> <div>FCT-NM Reference = <b>Kuiper et al (2008)</b></div> <div>FCT-NM 40Ar/39Ar Ratio = <b>9.48785 ± 0.01547</b></div> <div>FCT-NMJ-value = <b>0.00163636 ± 0.00000267</b></div> <div>Air Shot 40Ar/36Ar = <b>298.3680 ± 0.4207</b></div> <div>Air Shot MDF = <b>1.00016108 ± 0.00043886 (LIN)</b></div> <div>Experiment Type = <b>Total Fusion</b></div> <div>Extraction Method = <b>Single Crystal Laser Heating</b></div> <div>Heating = <b>62 sec</b></div> <div>Isolation = <b>1.62 min</b></div> <div>Instrument = <b>ARGUS-VI-F</b></div> <div>Preferred Age = <b>Ideogram Age</b></div> <div>Age Classification = <b>Eruption Age</b></div> <div>IGSN = <b>Undefined</b></div> <div>Rock Class = <b>Undefined</b></div> <div>Lithology = <b>Undefined</b></div> <div>Lat-Lon = <b>Undefined - Undefined</b></div> | <div>Age Plateau<br/><b>Error Mean</b></div> <div>Total Fusion Age</div> <div>Normal Isochron<br/><b>Error Chron</b></div> <div>Inverse Isochron<br/><b>Error Chron</b></div> <div>320.97 ± 50.47<br/>± 15.72%</div> <div>301.71 ± 48.20<br/>± 15.98%</div> |

| 40(r)/39(k) ± 2σ | Age ± 2σ<br>(Ma) | 40Ar(r)<br>(%) | 39Ar(k)<br>(%) | K/Ca ± 2σ |
|------------------|------------------|----------------|----------------|-----------|
| 3.82157 ±0.00382 | 11.41 ±0.01      | 99.91          | 3.56           | 22.6 ±0.3 |
| 3.81939 ±0.00364 | 11.40 ±0.01      | 99.87          | 4.85           | 23.5 ±0.3 |
| 3.81799 ±0.00403 | 11.40 ±0.01      | 99.88          | 2.71           | 22.6 ±0.5 |
| 3.82019 ±0.00360 | 11.41 ±0.01      | 99.49          | 5.78           | 22.2 ±0.2 |
| 3.81661 ±0.00367 | 11.40 ±0.01      | 99.54          | 4.60           | 23.7 ±0.3 |
| 3.82180 ±0.00366 | 11.41 ±0.01      | 99.93          | 4.46           | 21.9 ±0.3 |
| 3.81791 ±0.00363 | 11.40 ±0.01      | 99.76          | 4.64           | 21.3 ±0.2 |
| 3.81617 ±0.00377 | 11.40 ±0.01      | 99.91          | 3.59           | 23.6 ±0.4 |
| 3.81744 ±0.00371 | 11.40 ±0.01      | 99.75          | 4.08           | 24.0 ±0.4 |
| 3.81322 ±0.00389 | 11.39 ±0.01      | 99.55          | 3.23           | 19.5 ±0.3 |
| 3.82183 ±0.00382 | 11.41 ±0.01      | 99.77          | 3.55           | 23.6 ±0.4 |
| 3.82097 ±0.00378 | 11.41 ±0.01      | 99.74          | 3.76           | 22.1 ±0.3 |
| 3.81854 ±0.00380 | 11.40 ±0.01      | 99.86          | 3.21           | 21.5 ±0.4 |
| 3.82073 ±0.00372 | 11.41 ±0.01      | 99.96          | 3.87           | 22.7 ±0.3 |
| 3.81958 ±0.00377 | 11.41 ±0.01      | 99.86          | 3.43           | 21.3 ±0.3 |
| 3.82093 ±0.00400 | 11.41 ±0.01      | 99.72          | 2.99           | 20.9 ±0.4 |
| 3.82125 ±0.00377 | 11.41 ±0.01      | 99.73          | 3.81           | 21.1 ±0.3 |
| 3.81858 ±0.00393 | 11.40 ±0.01      | 99.97          | 2.72           | 22.0 ±0.4 |
| 3.81515 ±0.00455 | 11.39 ±0.01      | 99.97          | 1.86           | 22.6 ±0.7 |
| 3.82366 ±0.00436 | 11.42 ±0.01      | 99.96          | 2.07           | 24.4 ±0.7 |
| 3.82363 ±0.00431 | 11.42 ±0.01      | 99.92          | 2.20           | 21.2 ±0.5 |
| 3.82017 ±0.00390 | 11.41 ±0.01      | 99.90          | 3.11           | 23.6 ±0.4 |
| 3.82566 ±0.00412 | 11.42 ±0.01      | 99.60          | 2.71           | 22.4 ±0.5 |
| 3.82423 ±0.00396 | 11.42 ±0.01      | 100.04         | 2.85           | 26.8 ±0.6 |
| 3.82156 ±0.00396 | 11.41 ±0.01      | 99.48          | 2.85           | 22.0 ±0.4 |
| 3.81815 ±0.00396 | 11.40 ±0.01      | 100.04         | 2.91           | 21.0 ±0.4 |
| 3.81565 ±0.00446 | 11.39 ±0.01      | 100.03         | 1.87           | 22.2 ±0.6 |
| 3.83314 ±0.00449 | 11.45 ±0.01      | 100.05         | 1.90           | 24.5 ±0.7 |
| 3.81793 ±0.00401 | 11.40 ±0.01      | 99.80          | 2.82           | 23.0 ±0.4 |
| 3.81917 ±0.00370 | 11.40 ±0.01      | 99.74          | 4.04           | 22.5 ±0.3 |

| 40(r)/39(k) ± 2σ                                                      | Age ± 2σ<br>(Ma)                        | MSWD                         | 39Ar(k)<br>(%,n)                                          | K/Ca ± 2σ |
|-----------------------------------------------------------------------|-----------------------------------------|------------------------------|-----------------------------------------------------------|-----------|
| 3.81963 ±0.00103<br>±0.03%<br>Full External Error<br>Analytical Error | 11.41 ±0.04<br>±0.33%<br>±0.59<br>±0.00 | 2.02<br>0%<br>1.53<br>1.4223 | 98.10<br>29<br>2σ Confidence Limit<br>Error Magnification | 22.2 ±0.4 |
| 3.81987 ±0.00072<br>±0.02%<br>Full External Error<br>Analytical Error | 11.41 ±0.04<br>±0.33%<br>±0.59<br>±0.00 |                              | 30                                                        | 22.4 ±0.1 |
| 3.81824 ±0.00166<br>±0.04%<br>Full External Error<br>Analytical Error | 11.40 ±0.04<br>±0.33%<br>±0.59<br>±0.00 | 1.69<br>1%<br>1.54<br>1.3007 | 98.10<br>29<br>2σ Confidence Limit<br>Error Magnification |           |
|                                                                       |                                         | 1<br>0.0000000009            | Number of Iterations<br>Convergence                       |           |
| 3.81956 ±0.00155<br>±0.04%<br>Full External Error<br>Analytical Error | 11.41 ±0.04<br>±0.33%<br>±0.59<br>±0.00 | 2.10<br>0%<br>1.54<br>1.4479 | 98.10<br>29<br>2σ Confidence Limit<br>Error Magnification |           |
|                                                                       |                                         | 3<br>0.0000006450<br>1%      | Number of Iterations<br>Convergence<br>Spreading Factor   |           |

| Incremental Heating |        |   | 36Ar(a)<br>[fA] | 37Ar(ca)<br>[fA] | 38Ar(cl)<br>[fA] | 39Ar(k)<br>[fA] | 40Ar(r)<br>[fA] | Age ± 2σ<br>(Ma) | 40Ar(r)<br>(%) | 39Ar(k)<br>(%) | K/Ca ± 2σ |
|---------------------|--------|---|-----------------|------------------|------------------|-----------------|-----------------|------------------|----------------|----------------|-----------|
| 20F11214            | 17.0 % | ✓ | 0.0013269       | 2.539589         | 0.0000000        | 133.4109        | 509.839         | 11.41 ±0.01      | 99.91          | 3.56           | 22.6 ±0.3 |
| 20F11215            | 17.0 % | ✓ | 0.0026214       | 3.326039         | 0.0000000        | 181.7396        | 694.135         | 11.40 ±0.01      | 99.87          | 4.85           | 23.5 ±0.3 |
| 20F11217            | 17.0 % | ✓ | 0.0013823       | 1.930523         | 0.0000000        | 101.6478        | 388.091         | 11.40 ±0.01      | 99.88          | 2.71           | 22.6 ±0.5 |
| 20F11218            | 17.0 % | ✓ | 0.0138566       | 4.205297         | 0.0000000        | 216.7331        | 827.962         | 11.41 ±0.01      | 99.49          | 5.78           | 22.2 ±0.2 |
| 20F11220            | 17.0 % | ✓ | 0.0098295       | 3.130859         | 0.0000000        | 172.6744        | 659.031         | 11.40 ±0.01      | 99.54          | 4.60           | 23.7 ±0.3 |
| 20F11221            | 17.0 % | ✓ | 0.0012392       | 3.279011         | 0.0000000        | 167.1021        | 638.631         | 11.41 ±0.01      | 99.93          | 4.46           | 21.9 ±0.3 |
| 20F11223            | 17.0 % | ✓ | 0.0050437       | 3.518068         | 0.0031259        | 173.8764        | 663.844         | 11.40 ±0.01      | 99.76          | 4.64           | 21.3 ±0.2 |
| 20F11224            | 17.0 % | ✓ | 0.0012800       | 2.447618         | 0.0000000        | 134.5518        | 513.472         | 11.40 ±0.01      | 99.91          | 3.59           | 23.6 ±0.4 |
| 20F11226            | 17.0 % | ✓ | 0.0046403       | 2.745080         | 0.0000000        | 153.1511        | 584.646         | 11.40 ±0.01      | 99.75          | 4.08           | 24.0 ±0.4 |
| 20F11227            | 17.0 % | ✓ | 0.0067076       | 2.675158         | 0.0000000        | 121.0835        | 461.718         | 11.39 ±0.01      | 99.55          | 3.23           | 19.5 ±0.3 |
| 20F11229            | 17.0 % | ✓ | 0.0035732       | 2.421681         | 0.0000000        | 132.9576        | 508.141         | 11.41 ±0.01      | 99.77          | 3.55           | 23.6 ±0.4 |
| 20F11230            | 17.0 % | ✓ | 0.0043952       | 2.745718         | 0.0000000        | 141.1295        | 539.251         | 11.41 ±0.01      | 99.74          | 3.76           | 22.1 ±0.3 |
| 20F11232            | 17.0 % | ✓ | 0.0018753       | 2.408487         | 0.0000000        | 120.2048        | 459.008         | 11.40 ±0.01      | 99.86          | 3.21           | 21.5 ±0.4 |
| 20F11233            | 17.0 % | ✓ | 0.0004146       | 2.752988         | 0.0080260        | 145.2871        | 555.103         | 11.41 ±0.01      | 99.96          | 3.87           | 22.7 ±0.3 |
| 20F11235            | 17.0 % | ✓ | 0.0020190       | 2.591380         | 0.0000000        | 128.6370        | 491.339         | 11.41 ±0.01      | 99.86          | 3.43           | 21.3 ±0.3 |
| 20F11236            | 17.0 % | ✓ | 0.0037746       | 2.307777         | 0.0000000        | 111.9608        | 427.794         | 11.41 ±0.01      | 99.72          | 2.99           | 20.9 ±0.4 |
| 20F11238            | 17.0 % | ✓ | 0.0045761       | 2.915322         | 0.0000000        | 142.8201        | 545.751         | 11.41 ±0.01      | 99.73          | 3.81           | 21.1 ±0.3 |
| 20F11239            | 17.0 % | ✓ | 0.0002092       | 1.994216         | 0.0000000        | 101.8452        | 388.904         | 11.40 ±0.01      | 99.97          | 2.72           | 22.0 ±0.4 |
| 20F11241            | 17.0 % | ✓ | 0.0001350       | 1.328208         | 0.0000000        | 69.7032         | 265.928         | 11.39 ±0.01      | 99.97          | 1.86           | 22.6 ±0.7 |
| 20F11242            | 17.0 % | ✓ | 0.0002815       | 1.364430         | 0.0000000        | 77.4961         | 296.319         | 11.42 ±0.01      | 99.96          | 2.07           | 24.4 ±0.7 |
| 20F11244            | 17.0 % | ✓ | 0.0006768       | 1.671069         | 0.0000000        | 82.3237         | 314.775         | 11.42 ±0.01      | 99.92          | 2.20           | 21.2 ±0.5 |
| 20F11245            | 17.0 % | ✓ | 0.0012281       | 2.125244         | 0.0000000        | 116.5891        | 445.390         | 11.41 ±0.01      | 99.90          | 3.11           | 23.6 ±0.4 |
| 20F11247            | 17.0 % | ✓ | 0.0050790       | 1.949754         | 0.0000000        | 101.7309        | 389.188         | 11.42 ±0.01      | 99.60          | 2.71           | 22.4 ±0.5 |
| 20F11248            | 17.0 % | ✓ | 0.0007444       | 1.714107         | 0.0000000        | 106.8035        | 408.441         | 11.42 ±0.01      | 100.04         | 2.85           | 26.8 ±0.6 |
| 20F11250            | 17.0 % | ✓ | 0.0069871       | 2.089010         | 0.0000000        | 106.7614        | 407.995         | 11.41 ±0.01      | 99.48          | 2.85           | 22.0 ±0.4 |
| 20F11251            | 17.0 % | ✓ | 0.0007895       | 2.234553         | 0.0000000        | 109.2696        | 417.207         | 11.40 ±0.01      | 100.04         | 2.91           | 21.0 ±0.4 |
| 20F11253            | 17.0 % | ✓ | 0.0004022       | 1.360354         | 0.0000000        | 70.2247         | 267.953         | 11.39 ±0.01      | 100.03         | 1.87           | 22.2 ±0.6 |
| 20F11254            | 17.0 % |   | 0.0006024       | 1.251884         | 0.0000000        | 71.3701         | 273.572         | 11.45 ±0.01      | 100.05         | 1.90           | 24.5 ±0.7 |
| 20F11256            | 17.0 % | ✓ | 0.0025316       | 1.978262         | 0.0000000        | 105.9473        | 404.500         | 11.40 ±0.01      | 99.80          | 2.82           | 23.0 ±0.4 |
| 20F11257            | 17.0 % | ✓ | 0.0047037       | 2.898345         | 0.0000000        | 151.3500        | 578.031         | 11.40 ±0.01      | 99.74          | 4.04           | 22.5 ±0.3 |
| Σ                   |        |   | 0.0878490       | 71.900030        | 0.0111519        | 3750.3825       | 14325.959       |                  |                |                |           |

| Information on Analysis                                                                                                                                                                                                                                     | Results                   | 40(r)/39(k) ± 2σ          | Age ± 2σ<br>(Ma)     | MSWD   | 39Ar(k)<br>(%,n)    | K/Ca ± 2σ  |
|-------------------------------------------------------------------------------------------------------------------------------------------------------------------------------------------------------------------------------------------------------------|---------------------------|---------------------------|----------------------|--------|---------------------|------------|
| Project = SWENTON (18-58)<br>Sample = VS17-034<br>Material = Sanidine<br>Location = Stockade Mountain<br>Region = Eastern Oregon<br>Analyst = Dan Miggins<br>Irradiation = 20-OSU-01 (1C28-20)<br>J = 0.00163636 ± 0.00000267<br>FCT-NM = 28.201 ± 0.023 Ma | Age Plateau<br>Error Mean | 3.81963 ± 0.00103 ± 0.03% | 11.41 ± 0.04 ± 0.33% | 2.02   | 98.10               | 22.2 ± 0.4 |
|                                                                                                                                                                                                                                                             |                           |                           |                      | 0%     | 29                  |            |
|                                                                                                                                                                                                                                                             |                           |                           |                      | 1.53   | 2σ Confidence Limit |            |
|                                                                                                                                                                                                                                                             | Total Fusion Age          | 3.81987 ± 0.00072 ± 0.02% | 11.41 ± 0.04 ± 0.33% | 1.4223 | Error Magnification |            |
|                                                                                                                                                                                                                                                             |                           |                           |                      |        | 30                  | 22.4 ± 0.1 |

| Normal Isochron |        |   | 39(k)/36(a) ± 2σ       | 40(a+r)/36(a) ± 2σ      | r.i.   |
|-----------------|--------|---|------------------------|-------------------------|--------|
| 20F11214        | 17.0 % | ✓ | 100545.14 ± 47853.48   | 384538.80 ± 183017.15   | 1.0000 |
| 20F11215        | 17.0 % | ✓ | 69329.36 ± 17332.63    | 265094.42 ± 66274.28    | 1.0000 |
| 20F11217        | 17.0 % | ✓ | 73537.17 ± 32832.73    | 281063.01 ± 125488.22   | 1.0000 |
| 20F11218        | 17.0 % | ✓ | 15641.17 ± 842.25      | 60050.85 ± 3233.21      | 0.9999 |
| 20F11220        | 17.0 % | ✓ | 17566.91 ± 1237.94     | 67344.64 ± 4745.39      | 0.9999 |
| 20F11221        | 17.0 % | ✓ | 134850.35 ± 68740.38   | 515669.83 ± 262863.88   | 1.0000 |
| 20F11223        | 17.0 % | ✓ | 34473.98 ± 4363.82     | 131917.05 ± 16698.03    | 1.0000 |
| 20F11224        | 17.0 % | ✓ | 105121.70 ± 48062.86   | 401460.87 ± 183552.19   | 1.0000 |
| 20F11226        | 17.0 % | ✓ | 33004.41 ± 4428.15     | 126291.05 ± 16943.89    | 1.0000 |
| 20F11227        | 17.0 % | ✓ | 18051.67 ± 1715.12     | 69133.47 ± 6568.21      | 1.0000 |
| 20F11229        | 17.0 % | ✓ | 37209.20 ± 6751.73     | 142505.86 ± 25857.81    | 1.0000 |
| 20F11230        | 17.0 % | ✓ | 32110.16 ± 4904.69     | 122990.44 ± 18785.94    | 1.0000 |
| 20F11232        | 17.0 % | ✓ | 64098.83 ± 19288.08    | 245062.82 ± 73741.90    | 1.0000 |
| 20F11233        | 17.0 % | ✓ | 350442.61 ± 531159.66  | 1339244.32 ± 2029868.56 | 1.0000 |
| 20F11235        | 17.0 % | ✓ | 63713.94 ± 17750.83    | 243659.05 ± 67883.54    | 1.0000 |
| 20F11236        | 17.0 % | ✓ | 29661.46 ± 5255.31     | 113632.93 ± 20132.79    | 1.0000 |
| 20F11238        | 17.0 % | ✓ | 31210.01 ± 4499.88     | 119559.70 ± 17237.86    | 1.0000 |
| 20F11239        | 17.0 % | ✓ | 486790.86 ± 1296785.81 | 1859149.45 ± 4952678.29 | 1.0000 |
| 20F11241        | 17.0 % | ✓ | 516220.88 ± 2321301.67 | 1969761.13 ± 8857467.52 | 1.0000 |
| 20F11242        | 17.0 % | ✓ | 275290.92 ± 585821.53  | 1052916.39 ± 2240615.19 | 1.0000 |
| 20F11244        | 17.0 % | ✓ | 121640.69 ± 111342.25  | 465407.65 ± 426004.71   | 1.0000 |
| 20F11245        | 17.0 % | ✓ | 94936.50 ± 49089.22    | 362971.66 ± 187683.05   | 1.0000 |
| 20F11247        | 17.0 % | ✓ | 20029.60 ± 2639.80     | 76925.05 ± 10138.07     | 1.0000 |
| 20F11248        | 17.0 % | ✓ | 143484.96 ± 113618.35  | 548420.50 ± 434265.67   | 1.0000 |
| 20F11250        | 17.0 % | ✓ | 15279.81 ± 1326.08     | 58691.23 ± 5093.33      | 0.9999 |
| 20F11251        | 17.0 % | ✓ | 138398.95 ± 106236.64  | 528128.85 ± 405397.56   | 1.0000 |
| 20F11253        | 17.0 % | ✓ | 174607.91 ± 242950.51  | 665944.76 ± 926599.35   | 1.0000 |
| 20F11254        | 17.0 % |   | 118484.60 ± 113013.25  | 453869.36 ± 432910.47   | 1.0000 |
| 20F11256        | 17.0 % | ✓ | 41850.08 ± 10419.14    | 160079.30 ± 39853.63    | 1.0000 |
| 20F11257        | 17.0 % | ✓ | 32176.65 ± 4387.13     | 123186.62 ± 16795.54    | 1.0000 |

| Results         | 40(a)/36(a) ± 2σ      | 40(r)/39(k) ± 2σ  | Age ± 2σ (Ma)              | MSWD            |
|-----------------|-----------------------|-------------------|----------------------------|-----------------|
| Normal Isochron | 320.97 ± 50.47        | 3.81824 ± 0.00166 | 11.40 ± 0.04               | 1.69            |
| Error Chron     | ± 15.72%              | ± 0.04%           | ± 0.33%                    | 1%              |
|                 |                       |                   | Full External Error ± 0.59 |                 |
|                 |                       |                   | Analytical Error ± 0.00    |                 |
|                 |                       |                   |                            |                 |
| Statistics      | 2σ Confidence Limit   | 1.54              | Convergence                | 0.00000000929   |
|                 | Error Magnification   | 1.3007            | Number of Iterations       | 1               |
|                 | Number of Data Points | 29                | Calculated Line            | Weighted York-2 |

| Inverse Isochron |        |   | 39(k)/40(a+r) ± 2σ   | 36(a)/40(a+r) ± 2σ     | r.i.   |
|------------------|--------|---|----------------------|------------------------|--------|
| 20F11214         | 17.0 % | ✓ | 0.2614694 ±0.0002424 | 0.00000260 ±0.00000124 | 0.0001 |
| 20F11215         | 17.0 % | ✓ | 0.2615271 ±0.0002382 | 0.00000377 ±0.00000094 | 0.0001 |
| 20F11217         | 17.0 % | ✓ | 0.2616394 ±0.0002468 | 0.00000356 ±0.00000159 | 0.0001 |
| 20F11218         | 17.0 % | ✓ | 0.2604653 ±0.0002350 | 0.00001665 ±0.00000090 | 0.0003 |
| 20F11220         | 17.0 % | ✓ | 0.2608509 ±0.0002369 | 0.00001485 ±0.00000105 | 0.0003 |
| 20F11221         | 17.0 % | ✓ | 0.2615052 ±0.0002379 | 0.00000194 ±0.00000099 | 0.0000 |
| 20F11223         | 17.0 % | ✓ | 0.2613307 ±0.0002372 | 0.00000758 ±0.00000096 | 0.0001 |
| 20F11224         | 17.0 % | ✓ | 0.2618479 ±0.0002429 | 0.00000249 ±0.00000114 | 0.0001 |
| 20F11226         | 17.0 % | ✓ | 0.2613361 ±0.0002403 | 0.00000792 ±0.00000106 | 0.0001 |
| 20F11227         | 17.0 % | ✓ | 0.2611133 ±0.0002433 | 0.00001446 ±0.00000137 | 0.0003 |
| 20F11229         | 17.0 % | ✓ | 0.2611065 ±0.0002416 | 0.00000702 ±0.00000127 | 0.0001 |
| 20F11230         | 17.0 % | ✓ | 0.2610785 ±0.0002395 | 0.00000813 ±0.00000124 | 0.0001 |
| 20F11232         | 17.0 % | ✓ | 0.2615608 ±0.0002422 | 0.00000408 ±0.00000123 | 0.0001 |
| 20F11233         | 17.0 % | ✓ | 0.2616719 ±0.0002389 | 0.00000075 ±0.00000113 | 0.0000 |
| 20F11235         | 17.0 % | ✓ | 0.2614881 ±0.0002423 | 0.00000410 ±0.00000114 | 0.0001 |
| 20F11236         | 17.0 % | ✓ | 0.2610287 ±0.0002443 | 0.00000880 ±0.00000156 | 0.0002 |
| 20F11238         | 17.0 % | ✓ | 0.2610413 ±0.0002397 | 0.00000836 ±0.00000121 | 0.0002 |
| 20F11239         | 17.0 % | ✓ | 0.2618352 ±0.0002447 | 0.00000054 ±0.00000143 | 0.0000 |
| 20F11241         | 17.0 % | ✓ | 0.2620728 ±0.0002568 | 0.00000051 ±0.00000228 | 0.0000 |
| 20F11242         | 17.0 % | ✓ | 0.2614556 ±0.0002532 | 0.00000095 ±0.00000202 | 0.0000 |
| 20F11244         | 17.0 % | ✓ | 0.2613638 ±0.0002515 | 0.00000215 ±0.00000197 | 0.0000 |
| 20F11245         | 17.0 % | ✓ | 0.2615535 ±0.0002430 | 0.00000276 ±0.00000142 | 0.0001 |
| 20F11247         | 17.0 % | ✓ | 0.2603782 ±0.0002463 | 0.00001300 ±0.00000171 | 0.0002 |
| 20F11248         | 17.0 % | ✓ | 0.2616331 ±0.0002466 | 0.00000182 ±0.00000144 | 0.0000 |
| 20F11250         | 17.0 % | ✓ | 0.2603423 ±0.0002437 | 0.00001704 ±0.00000148 | 0.0004 |
| 20F11251         | 17.0 % | ✓ | 0.2620553 ±0.0002468 | 0.00000189 ±0.00000145 | 0.0000 |
| 20F11253         | 17.0 % | ✓ | 0.2621958 ±0.0002592 | 0.00000150 ±0.00000209 | 0.0000 |
| 20F11254         | 17.0 % |   | 0.2610544 ±0.0002579 | 0.00000220 ±0.00000210 | 0.0001 |
| 20F11256         | 17.0 % | ✓ | 0.2614334 ±0.0002460 | 0.00000625 ±0.00000156 | 0.0001 |
| 20F11257         | 17.0 % | ✓ | 0.2612025 ±0.0002379 | 0.00000812 ±0.00000111 | 0.0001 |

| Results          | 40(a)/36(a) ± 2σ      | 40(r)/39(k) ± 2σ | Age ± 2σ (Ma)             | MSWD            |
|------------------|-----------------------|------------------|---------------------------|-----------------|
| Inverse Isochron | 301.71 ±48.20         | 3.81956 ±0.00155 | 11.41 ±0.04               | 2.10            |
| Error Chron      | ±15.98%               | ±0.04%           | ±0.33%                    | 0%              |
|                  |                       |                  | Full External Error ±0.59 |                 |
|                  |                       |                  | Analytical Error ±0.00    |                 |
|                  |                       |                  |                           |                 |
| Statistics       | 2σ Confidence Limit   | 1.54             | Convergence               | 0.0000006450    |
|                  | Error Magnification   | 1.4479           | Number of Iterations      | 3               |
|                  | Number of Data Points | 29               | Calculated Line           | Weighted York-2 |
|                  | Spreading Factor      | 0.7%             |                           |                 |



| Degassing Patterns |        |   | 36Ar(a)<br>[fA] | %1σ    | 36Ar(c)<br>[fA] | %1σ  | 36Ar(ca)<br>[fA] | %1σ  | 36Ar(cl)<br>[fA] | %1σ    | 37Ar(ca)<br>[fA] | %1σ  | 38Ar(a)<br>[fA] | %1σ    | 38Ar(c)<br>[fA] | %1σ  | 38Ar(k)<br>[fA] | %1σ  | 38Ar(ca)<br>[fA] | %1σ  | 38Ar(cl)<br>[fA] | %1σ    | 39Ar(k)<br>[fA] | %1σ  | 39Ar(ca)<br>[fA] | %1σ  |
|--------------------|--------|---|-----------------|--------|-----------------|------|------------------|------|------------------|--------|------------------|------|-----------------|--------|-----------------|------|-----------------|------|------------------|------|------------------|--------|-----------------|------|------------------|------|
| 20F11214           | 17.0 % | ✓ | 0.0013269       | 23.80  | 0.0000000       | 0.00 | 0.0006865        | 0.76 | 0.0000000        | 0.00   | 2.539589         | 0.74 | 0.0002501       | 23.80  | 0.0000000       | 0.00 | 1.611203        | 0.10 | 0.0004571        | 9.66 | 0.0000000        | 0.00   | 133.4109        | 0.05 | 0.0016317        | 1.18 |
| 20F11215           | 17.0 % | ✓ | 0.0026214       | 12.50  | 0.0000000       | 0.00 | 0.0008990        | 0.60 | 0.0000000        | 0.00   | 3.326039         | 0.57 | 0.0004941       | 12.50  | 0.0000000       | 0.00 | 2.194870        | 0.10 | 0.0005987        | 9.65 | 0.0000000        | 0.00   | 181.7396        | 0.05 | 0.0021370        | 1.08 |
| 20F11217           | 17.0 % | ✓ | 0.0013823       | 22.32  | 0.0000000       | 0.00 | 0.0005218        | 1.04 | 0.0000000        | 0.00   | 1.930523         | 1.03 | 0.0002606       | 22.32  | 0.0000000       | 0.00 | 1.227600        | 0.10 | 0.0003475        | 9.68 | 0.0000000        | 0.00   | 101.6478        | 0.05 | 0.0012404        | 1.38 |
| 20F11218           | 17.0 % | ✓ | 0.0138566       | 2.69   | 0.0000000       | 0.00 | 0.0011367        | 0.50 | 0.0000000        | 0.00   | 4.205297         | 0.48 | 0.0026120       | 2.70   | 0.0000000       | 0.00 | 2.617485        | 0.10 | 0.0007570        | 9.64 | 0.0000000        | 0.00   | 216.7331        | 0.04 | 0.0027019        | 1.04 |
| 20F11220           | 17.0 % | ✓ | 0.0098295       | 3.52   | 0.0000000       | 0.00 | 0.0008463        | 0.61 | 0.0000000        | 0.00   | 3.130859         | 0.59 | 0.0018529       | 3.53   | 0.0000000       | 0.00 | 2.085389        | 0.10 | 0.0005636        | 9.65 | 0.0000000        | 0.00   | 172.6744        | 0.04 | 0.0020116        | 1.09 |
| 20F11221           | 17.0 % | ✓ | 0.0012392       | 25.49  | 0.0000000       | 0.00 | 0.0008863        | 0.61 | 0.0000000        | 0.00   | 3.279011         | 0.59 | 0.0002336       | 25.49  | 0.0000000       | 0.00 | 2.018092        | 0.10 | 0.0005902        | 9.65 | 0.0000000        | 0.00   | 167.1021        | 0.04 | 0.0021068        | 1.09 |
| 20F11223           | 17.0 % | ✓ | 0.0050437       | 6.33   | 0.0000000       | 0.00 | 0.0009509        | 0.55 | 0.0000002        | 311.46 | 3.518068         | 0.52 | 0.0009507       | 6.33   | 0.0000000       | 0.00 | 2.099905        | 0.10 | 0.0006333        | 9.64 | 0.0031259        | 311.46 | 173.8764        | 0.04 | 0.0022604        | 1.06 |
| 20F11224           | 17.0 % | ✓ | 0.0012800       | 22.86  | 0.0000000       | 0.00 | 0.0006616        | 0.77 | 0.0000000        | 0.00   | 2.447618         | 0.75 | 0.0002413       | 22.86  | 0.0000000       | 0.00 | 1.624982        | 0.10 | 0.0004406        | 9.66 | 0.0000000        | 0.00   | 134.5518        | 0.05 | 0.0015726        | 1.19 |
| 20F11226           | 17.0 % | ✓ | 0.0046403       | 6.71   | 0.0000000       | 0.00 | 0.0007420        | 0.75 | 0.0000000        | 0.00   | 2.745080         | 0.74 | 0.0008747       | 6.71   | 0.0000000       | 0.00 | 1.849606        | 0.10 | 0.0004941        | 9.66 | 0.0000000        | 0.00   | 153.1511        | 0.05 | 0.0017637        | 1.18 |
| 20F11227           | 17.0 % | ✓ | 0.0067076       | 4.75   | 0.0000000       | 0.00 | 0.0007231        | 0.83 | 0.0000000        | 0.00   | 2.675158         | 0.81 | 0.0012644       | 4.75   | 0.0000000       | 0.00 | 1.462326        | 0.10 | 0.0004815        | 9.66 | 0.0000000        | 0.00   | 121.0835        | 0.05 | 0.0017188        | 1.23 |
| 20F11229           | 17.0 % | ✓ | 0.0035732       | 9.07   | 0.0000000       | 0.00 | 0.0006546        | 0.83 | 0.0000000        | 0.00   | 2.421681         | 0.81 | 0.0006736       | 9.07   | 0.0000000       | 0.00 | 1.605728        | 0.10 | 0.0004359        | 9.66 | 0.0000000        | 0.00   | 132.9576        | 0.05 | 0.0015559        | 1.23 |
| 20F11230           | 17.0 % | ✓ | 0.0043952       | 7.64   | 0.0000000       | 0.00 | 0.0007422        | 0.71 | 0.0000000        | 0.00   | 2.745718         | 0.69 | 0.0008285       | 7.64   | 0.0000000       | 0.00 | 1.704421        | 0.10 | 0.0004942        | 9.65 | 0.0000000        | 0.00   | 141.1295        | 0.05 | 0.0017641        | 1.15 |
| 20F11232           | 17.0 % | ✓ | 0.0018753       | 15.05  | 0.0000000       | 0.00 | 0.0006510        | 0.89 | 0.0000000        | 0.00   | 2.408487         | 0.87 | 0.0003535       | 15.05  | 0.0000000       | 0.00 | 1.451714        | 0.10 | 0.0004335        | 9.67 | 0.0000000        | 0.00   | 120.2048        | 0.05 | 0.0015475        | 1.27 |
| 20F11233           | 17.0 % | ✓ | 0.0004146       | 75.78  | 0.0000000       | 0.00 | 0.0007441        | 0.73 | 0.0000005        | 128.95 | 2.752988         | 0.71 | 0.0000781       | 75.78  | 0.0000000       | 0.00 | 1.754633        | 0.10 | 0.0004955        | 9.66 | 0.0080260        | 128.96 | 145.2871        | 0.05 | 0.0017688        | 1.16 |
| 20F11235           | 17.0 % | ✓ | 0.0020190       | 13.93  | 0.0000000       | 0.00 | 0.0007005        | 0.77 | 0.0000000        | 0.00   | 2.591380         | 0.75 | 0.0003806       | 13.93  | 0.0000000       | 0.00 | 1.553549        | 0.10 | 0.0004664        | 9.66 | 0.0000000        | 0.00   | 128.6370        | 0.05 | 0.0016650        | 1.19 |
| 20F11236           | 17.0 % | ✓ | 0.0037746       | 8.86   | 0.0000000       | 0.00 | 0.0006238        | 0.88 | 0.0000000        | 0.00   | 2.307777         | 0.87 | 0.0007115       | 8.86   | 0.0000000       | 0.00 | 1.352151        | 0.10 | 0.0004154        | 9.67 | 0.0000000        | 0.00   | 111.9608        | 0.05 | 0.0014827        | 1.26 |
| 20F11238           | 17.0 % | ✓ | 0.0045761       | 7.21   | 0.0000000       | 0.00 | 0.0007880        | 0.65 | 0.0000000        | 0.00   | 2.915322         | 0.63 | 0.0008626       | 7.21   | 0.0000000       | 0.00 | 1.724838        | 0.10 | 0.0005248        | 9.65 | 0.0000000        | 0.00   | 142.8201        | 0.05 | 0.0018731        | 1.11 |
| 20F11239           | 17.0 % | ✓ | 0.0002092       | 133.20 | 0.0000000       | 0.00 | 0.0005390        | 0.93 | 0.0000000        | 0.00   | 1.994216         | 0.91 | 0.0000394       | 133.20 | 0.0000000       | 0.00 | 1.229984        | 0.10 | 0.0003590        | 9.67 | 0.0000000        | 0.00   | 101.8452        | 0.05 | 0.0012813        | 1.29 |
| 20F11241           | 17.0 % | ✓ | 0.0001350       | 224.84 | 0.0000000       | 0.00 | 0.0003590        | 1.49 | 0.0000000        | 0.00   | 1.328208         | 1.48 | 0.0000255       | 224.84 | 0.0000000       | 0.00 | 0.841805        | 0.10 | 0.0002391        | 9.74 | 0.0000000        | 0.00   | 69.7032         | 0.05 | 0.0008534        | 1.74 |
| 20F11242           | 17.0 % | ✓ | 0.0002815       | 106.40 | 0.0000000       | 0.00 | 0.0003688        | 1.46 | 0.0000000        | 0.00   | 1.364430         | 1.45 | 0.0000531       | 106.40 | 0.0000000       | 0.00 | 0.935921        | 0.10 | 0.0002456        | 9.74 | 0.0000000        | 0.00   | 77.4961         | 0.05 | 0.0008766        | 1.72 |
| 20F11244           | 17.0 % | ✓ | 0.0006768       | 45.77  | 0.0000000       | 0.00 | 0.0004517        | 1.17 | 0.0000000        | 0.00   | 1.671069         | 1.16 | 0.0001276       | 45.77  | 0.0000000       | 0.00 | 0.994223        | 0.10 | 0.0003008        | 9.70 | 0.0000000        | 0.00   | 82.3237         | 0.05 | 0.0010737        | 1.48 |
| 20F11245           | 17.0 % | ✓ | 0.0012281       | 25.85  | 0.0000000       | 0.00 | 0.0005745        | 0.93 | 0.0000000        | 0.00   | 2.125244         | 0.92 | 0.0002315       | 25.85  | 0.0000000       | 0.00 | 1.408046        | 0.10 | 0.0003825        | 9.67 | 0.0000000        | 0.00   | 116.5891        | 0.05 | 0.0013655        | 1.30 |
| 20F11247           | 17.0 % | ✓ | 0.0050790       | 6.59   | 0.0000000       | 0.00 | 0.0005270        | 1.03 | 0.0000000        | 0.00   | 1.949754         | 1.01 | 0.0009574       | 6.59   | 0.0000000       | 0.00 | 1.228605        | 0.10 | 0.0003510        | 9.68 | 0.0000000        | 0.00   | 101.7309        | 0.05 | 0.0012527        | 1.37 |
| 20F11248           | 17.0 % | ✓ | 0.0007444       | 39.59  | 0.0000000       | 0.00 | 0.0004633        | 1.14 | 0.0000000        | 0.00   | 1.714107         | 1.13 | 0.0001403       | 39.59  | 0.0000000       | 0.00 | 1.289866        | 0.10 | 0.0003085        | 9.70 | 0.0000000        | 0.00   | 106.8035        | 0.05 | 0.0011013        | 1.45 |
| 20F11250           | 17.0 % | ✓ | 0.0069871       | 4.34   | 0.0000000       | 0.00 | 0.0005647        | 0.96 | 0.0000000        | 0.00   | 2.089010         | 0.95 | 0.0013171       | 4.34   | 0.0000000       | 0.00 | 1.289358        | 0.10 | 0.0003760        | 9.68 | 0.0000000        | 0.00   | 106.7614        | 0.05 | 0.0013422        | 1.32 |
| 20F11251           | 17.0 % | ✓ | 0.0007895       | 38.38  | 0.0000000       | 0.00 | 0.0006040        | 0.90 | 0.0000000        | 0.00   | 2.234553         | 0.88 | 0.0001488       | 38.38  | 0.0000000       | 0.00 | 1.319649        | 0.10 | 0.0004022        | 9.67 | 0.0000000        | 0.00   | 109.2696        | 0.05 | 0.0014357        | 1.28 |
| 20F11253           | 17.0 % | ✓ | 0.0004022       | 69.57  | 0.0000000       | 0.00 | 0.0003677        | 1.40 | 0.0000000        | 0.00   | 1.360354         | 1.39 | 0.0000758       | 69.57  | 0.0000000       | 0.00 | 0.848104        | 0.10 | 0.0002449        | 9.73 | 0.0000000        | 0.00   | 70.2247         | 0.05 | 0.0008740        | 1.67 |
| 20F11254           | 17.0 % |   | 0.0006024       | 47.69  | 0.0000000       | 0.00 | 0.0003384        | 1.52 | 0.0000000        | 0.00   | 1.251884         | 1.51 | 0.0001135       | 47.69  | 0.0000000       | 0.00 | 0.861937        | 0.10 | 0.0002253        | 9.75 | 0.0000000        | 0.00   | 71.3701         | 0.05 | 0.0008043        | 1.77 |
| 20F11256           | 17.0 % | ✓ | 0.0025316       | 12.45  | 0.0000000       | 0.00 | 0.0005347        | 0.97 | 0.0000000        | 0.00   | 1.978262         | 0.95 | 0.0004772       | 12.45  | 0.0000000       | 0.00 | 1.279526        | 0.10 | 0.0003561        | 9.68 | 0.0000000        | 0.00   | 105.9473        | 0.05 | 0.0012710        | 1.33 |
| 20F11257           | 17.0 % | ✓ | 0.0047037       | 6.82   | 0.0000000       | 0.00 | 0.0007834        | 0.69 | 0.0000000        | 0.00   | 2.898345         | 0.67 | 0.0008867       | 6.82   | 0.0000000       | 0.00 | 1.827854        | 0.10 | 0.0005217        | 9.65 | 0.0000000        | 0.00   | 151.3500        | 0.05 | 0.0018622        | 1.14 |
|                    |        | Σ | 0.0878490       | 1.95   | 0.0000000       | 0.00 | 0.0194346        | 0.15 | 0.0000008        | 127.38 | 71.900030        | 0.15 | 0.0165595       | 1.95   | 0.0000000       | 0.00 | 45.293369       | 0.02 | 0.0129420        | 1.84 | 0.0111519        | 127.42 | 3750.3825       | 0.01 | 0.0461958        | 0.23 |
|                    |        | Σ |                 |        |                 |      |                  |      | 0.1072843        | 1.60   | 71.900030        | 0.15 |                 |        |                 |      |                 |      | 45.334022        | 0.04 |                  |        |                 |      | 3750.4287        | 0.01 |

| 40Ar(r)<br>[fA] | %1σ  | 40Ar(a)<br>[fA] | %1σ    | 40Ar(c)<br>[fA] | %1σ  | 40Ar(k)<br>[fA] | %1σ       |      |
|-----------------|------|-----------------|--------|-----------------|------|-----------------|-----------|------|
| 509.839         | 0.02 | 0.396152        | 23.80  | 0.0000000       | 0.00 | 0.0809804       | 9.65      |      |
| 694.135         | 0.02 | 0.782644        | 12.50  | 0.0000000       | 0.00 | 0.1103160       | 9.65      |      |
| 388.091         | 0.03 | 0.412689        | 22.32  | 0.0000000       | 0.00 | 0.0617002       | 9.65      |      |
| 827.962         | 0.01 | 4.137020        | 2.69   | 0.0000000       | 0.00 | 0.1315570       | 9.65      |      |
| 659.031         | 0.02 | 2.934704        | 3.52   | 0.0000000       | 0.00 | 0.1048134       | 9.65      |      |
| 638.631         | 0.02 | 0.369966        | 25.49  | 0.0000000       | 0.00 | 0.1014310       | 9.65      |      |
| 663.844         | 0.02 | 1.505847        | 6.33   | 0.0000000       | 0.00 | 0.1055430       | 9.65      |      |
| 513.472         | 0.02 | 0.382145        | 22.86  | 0.0000000       | 0.00 | 0.0816729       | 9.65      |      |
| 584.646         | 0.02 | 1.385415        | 6.71   | 0.0000000       | 0.00 | 0.0929627       | 9.65      |      |
| 461.718         | 0.02 | 2.002624        | 4.75   | 0.0000000       | 0.00 | 0.0734977       | 9.65      |      |
| 508.141         | 0.02 | 1.066828        | 9.07   | 0.0000000       | 0.00 | 0.0807052       | 9.65      |      |
| 539.251         | 0.02 | 1.312221        | 7.64   | 0.0000000       | 0.00 | 0.0856656       | 9.65      |      |
| 459.008         | 0.02 | 0.559891        | 15.05  | 0.0000000       | 0.00 | 0.0729643       | 9.65      |      |
| 555.103         | 0.02 | 0.123778        | 75.78  | 0.0000000       | 0.00 | 0.0881893       | 9.65      |      |
| 491.339         | 0.02 | 0.602786        | 13.93  | 0.0000000       | 0.00 | 0.0780826       | 9.65      |      |
| 427.794         | 0.02 | 1.126951        | 8.86   | 0.0000000       | 0.00 | 0.0679602       | 9.65      |      |
| 545.751         | 0.02 | 1.366240        | 7.21   | 0.0000000       | 0.00 | 0.0866918       | 9.65      |      |
| 388.904         | 0.02 | 0.062464        | 133.20 | 0.0000000       | 0.00 | 0.0618200       | 9.65      |      |
| 265.928         | 0.04 | 0.040313        | 224.84 | 0.0000000       | 0.00 | 0.0423098       | 9.65      |      |
| 296.319         | 0.03 | 0.084047        | 106.40 | 0.0000000       | 0.00 | 0.0470401       | 9.65      |      |
| 314.775         | 0.03 | 0.202059        | 45.77  | 0.0000000       | 0.00 | 0.0499705       | 9.65      |      |
| 445.390         | 0.02 | 0.366654        | 25.85  | 0.0000000       | 0.00 | 0.0707696       | 9.65      |      |
| 389.188         | 0.03 | 1.516395        | 6.59   | 0.0000000       | 0.00 | 0.0617507       | 9.65      |      |
| 408.441         | 0.02 | 0.222234        | 39.59  | 0.0000000       | 0.00 | 0.0648297       | 9.65      |      |
| 407.995         | 0.02 | 2.086066        | 4.34   | 0.0000000       | 0.00 | 0.0648042       | 9.65      |      |
| 417.207         | 0.02 | 0.235721        | 38.38  | 0.0000000       | 0.00 | 0.0663267       | 9.65      |      |
| 267.953         | 0.03 | 0.120076        | 69.57  | 0.0000000       | 0.00 | 0.0426264       | 9.65      |      |
| 273.572         | 0.03 | 0.179840        | 47.69  | 0.0000000       | 0.00 | 0.0433217       | 9.65      |      |
| 404.500         | 0.02 | 0.755832        | 12.45  | 0.0000000       | 0.00 | 0.0643100       | 9.65      |      |
| 578.031         | 0.02 | 1.404343        | 6.82   | 0.0000000       | 0.00 | 0.0918695       | 9.65      |      |
| 14325.959       | 0.00 | 26.228200       | 1.95   | 0.0000000       | 0.00 | 2.2764822       | 1.83      |      |
|                 |      |                 |        |                 |      |                 | 14354.463 | 0.01 |

| Additional Parameters |        |   | 40Ar/39Ar | 1σ       | 37Ar/39Ar | 1σ       | 36Ar/39Ar | 1σ       | Time (days) | 37Ar (decay) | 39Ar (decay) | 40Ar (moles) |
|-----------------------|--------|---|-----------|----------|-----------|----------|-----------|----------|-------------|--------------|--------------|--------------|
| 20F11214              | 17.0 % | ✓ | 3.825099  | 0.001772 | 0.019036  | 0.000141 | 0.000015  | 0.000002 | 41.650      | 2.282197     | 1.00029481   | 1.807E-11    |
| 20F11215              | 17.0 % | ✓ | 3.824258  | 0.001741 | 0.018301  | 0.000105 | 0.000019  | 0.000002 | 41.656      | 2.282448     | 1.00029485   | 2.460E-11    |
| 20F11217              | 17.0 % | ✓ | 3.822614  | 0.001802 | 0.018992  | 0.000195 | 0.000019  | 0.000003 | 41.667      | 2.282980     | 1.00029493   | 1.376E-11    |
| 20F11218              | 17.0 % | ✓ | 3.839841  | 0.001731 | 0.019403  | 0.000093 | 0.000069  | 0.000002 | 41.674      | 2.283262     | 1.00029497   | 2.946E-11    |
| 20F11220              | 17.0 % | ✓ | 3.834170  | 0.001740 | 0.018131  | 0.000107 | 0.000062  | 0.000002 | 41.685      | 2.283795     | 1.00029506   | 2.344E-11    |
| 20F11221              | 17.0 % | ✓ | 3.824574  | 0.001739 | 0.019623  | 0.000116 | 0.000013  | 0.000002 | 41.692      | 2.284076     | 1.00029510   | 2.262E-11    |
| 20F11223              | 17.0 % | ✓ | 3.827126  | 0.001736 | 0.020233  | 0.000106 | 0.000034  | 0.000002 | 41.703      | 2.284609     | 1.00029519   | 2.356E-11    |
| 20F11224              | 17.0 % | ✓ | 3.819573  | 0.001771 | 0.018191  | 0.000137 | 0.000014  | 0.000002 | 41.709      | 2.284860     | 1.00029522   | 1.819E-11    |
| 20F11226              | 17.0 % | ✓ | 3.827053  | 0.001758 | 0.017924  | 0.000132 | 0.000035  | 0.000002 | 41.722      | 2.285424     | 1.00029531   | 2.075E-11    |
| 20F11227              | 17.0 % | ✓ | 3.830308  | 0.001784 | 0.022093  | 0.000180 | 0.000061  | 0.000003 | 41.727      | 2.285675     | 1.00029535   | 1.642E-11    |
| 20F11229              | 17.0 % | ✓ | 3.830417  | 0.001771 | 0.018214  | 0.000148 | 0.000032  | 0.000002 | 41.739      | 2.286208     | 1.00029544   | 1.803E-11    |
| 20F11230              | 17.0 % | ✓ | 3.830824  | 0.001756 | 0.019455  | 0.000134 | 0.000036  | 0.000002 | 41.745      | 2.286490     | 1.00029548   | 1.914E-11    |
| 20F11232              | 17.0 % | ✓ | 3.823760  | 0.001769 | 0.020036  | 0.000174 | 0.000021  | 0.000002 | 41.757      | 2.287023     | 1.00029556   | 1.627E-11    |
| 20F11233              | 17.0 % | ✓ | 3.822140  | 0.001744 | 0.018948  | 0.000134 | 0.000008  | 0.000002 | 41.763      | 2.287306     | 1.00029561   | 1.966E-11    |
| 20F11235              | 17.0 % | ✓ | 3.824823  | 0.001771 | 0.020145  | 0.000152 | 0.000021  | 0.000002 | 41.775      | 2.287839     | 1.00029569   | 1.742E-11    |
| 20F11236              | 17.0 % | ✓ | 3.831553  | 0.001792 | 0.020612  | 0.000179 | 0.000039  | 0.000003 | 41.781      | 2.288090     | 1.00029573   | 1.519E-11    |
| 20F11238              | 17.0 % | ✓ | 3.831369  | 0.001758 | 0.020412  | 0.000128 | 0.000038  | 0.000002 | 41.793      | 2.288655     | 1.00029582   | 1.937E-11    |
| 20F11239              | 17.0 % | ✓ | 3.819754  | 0.001784 | 0.019581  | 0.000178 | 0.000007  | 0.000003 | 41.799      | 2.288906     | 1.00029586   | 1.377E-11    |
| 20F11241              | 17.0 % | ✓ | 3.816293  | 0.001869 | 0.019055  | 0.000282 | 0.000007  | 0.000004 | 41.810      | 2.289440     | 1.00029594   | 9.417E-12    |
| 20F11242              | 17.0 % | ✓ | 3.825304  | 0.001852 | 0.017606  | 0.000256 | 0.000008  | 0.000004 | 41.817      | 2.289723     | 1.00029598   | 1.049E-11    |
| 20F11244              | 17.0 % | ✓ | 3.826642  | 0.001840 | 0.020299  | 0.000236 | 0.000014  | 0.000004 | 41.828      | 2.290257     | 1.00029607   | 1.115E-11    |
| 20F11245              | 17.0 % | ✓ | 3.823872  | 0.001776 | 0.018228  | 0.000167 | 0.000015  | 0.000003 | 41.835      | 2.290540     | 1.00029611   | 1.578E-11    |
| 20F11247              | 17.0 % | ✓ | 3.841127  | 0.001816 | 0.019166  | 0.000195 | 0.000055  | 0.000003 | 41.847      | 2.291074     | 1.00029619   | 1.383E-11    |
| 20F11248              | 17.0 % | ✓ | 3.822714  | 0.001801 | 0.016049  | 0.000181 | 0.000003  | 0.000003 | 41.852      | 2.291325     | 1.00029623   | 1.445E-11    |
| 20F11250              | 17.0 % | ✓ | 3.841655  | 0.001797 | 0.019567  | 0.000186 | 0.000071  | 0.000003 | 41.865      | 2.291891     | 1.00029632   | 1.452E-11    |
| 20F11251              | 17.0 % | ✓ | 3.816546  | 0.001796 | 0.020450  | 0.000181 | 0.000002  | 0.000003 | 41.870      | 2.292142     | 1.00029636   | 1.476E-11    |
| 20F11253              | 17.0 % | ✓ | 3.814503  | 0.001885 | 0.019371  | 0.000269 | 0.000000  | 0.000004 | 41.882      | 2.292677     | 1.00029644   | 9.483E-12    |
| 20F11254              | 17.0 % |   | 3.831183  | 0.001892 | 0.017541  | 0.000266 | 0.000004  | 0.000004 | 41.888      | 2.292960     | 1.00029649   | 9.680E-12    |
| 20F11256              | 17.0 % | ✓ | 3.825627  | 0.001799 | 0.018672  | 0.000178 | 0.000029  | 0.000003 | 41.900      | 2.293495     | 1.00029657   | 1.435E-11    |
| 20F11257              | 17.0 % | ✓ | 3.829007  | 0.001743 | 0.019150  | 0.000128 | 0.000036  | 0.000002 | 41.906      | 2.293778     | 1.00029662   | 2.052E-11    |

| Procedure<br>Blanks |        | 36Ar ± 1σ (SE)<br>[fA] | 37Ar ± 1σ (SE)<br>[fA] | 38Ar ± 1σ (SE)<br>[fA] | 39Ar ± 1σ (SE)<br>[fA] | 40Ar ± 1σ (SE)<br>[fA] |
|---------------------|--------|------------------------|------------------------|------------------------|------------------------|------------------------|
| 20F11214            | 17.0 % | 0.0058587 ±0.0001948   | 0.0133668 ±0.0052622   | 0.0290378 ±0.0066178   | 0.0095120 ±0.0063314   | 1.2690356 ±0.0157909   |
| 20F11215            | 17.0 % | 0.0058587 ±0.0001948   | 0.0133668 ±0.0052622   | 0.0290378 ±0.0066178   | 0.0095120 ±0.0063314   | 1.2690356 ±0.0157909   |
| 20F11217            | 17.0 % | 0.0057134 ±0.0002000   | 0.0217302 ±0.0056815   | 0.0192728 ±0.0058370   | 0.0225714 ±0.0057953   | 1.2851859 ±0.0181202   |
| 20F11218            | 17.0 % | 0.0057134 ±0.0002000   | 0.0217302 ±0.0056815   | 0.0192728 ±0.0058370   | 0.0225714 ±0.0057953   | 1.2851859 ±0.0181202   |
| 20F11220            | 17.0 % | 0.0058679 ±0.0001924   | 0.0261521 ±0.0055487   | 0.0229776 ±0.0073771   | 0.0073626 ±0.0054474   | 1.2833353 ±0.0158265   |
| 20F11221            | 17.0 % | 0.0058679 ±0.0001924   | 0.0261521 ±0.0055487   | 0.0229776 ±0.0073771   | 0.0073626 ±0.0054474   | 1.2833353 ±0.0158265   |
| 20F11223            | 17.0 % | 0.0056621 ±0.0001717   | 0.0224048 ±0.0050035   | 0.0315670 ±0.0058440   | 0.0169103 ±0.0062419   | 1.3724688 ±0.0149818   |
| 20F11224            | 17.0 % | 0.0056621 ±0.0001717   | 0.0224048 ±0.0050035   | 0.0315670 ±0.0058440   | 0.0169103 ±0.0062419   | 1.3724688 ±0.0149818   |
| 20F11226            | 17.0 % | 0.0055766 ±0.0001745   | 0.0263730 ±0.0066329   | 0.0254430 ±0.0066434   | 0.0285015 ±0.0060589   | 1.3277378 ±0.0144853   |
| 20F11227            | 17.0 % | 0.0055766 ±0.0001745   | 0.0263730 ±0.0066329   | 0.0254430 ±0.0066434   | 0.0285015 ±0.0060589   | 1.3277378 ±0.0144853   |
| 20F11229            | 17.0 % | 0.0053401 ±0.0001849   | 0.0227005 ±0.0055640   | 0.0237092 ±0.0074681   | 0.0181863 ±0.0062950   | 1.2947334 ±0.0155867   |
| 20F11230            | 17.0 % | 0.0053401 ±0.0001849   | 0.0227005 ±0.0055640   | 0.0237092 ±0.0074681   | 0.0181863 ±0.0062950   | 1.2947334 ±0.0155867   |
| 20F11232            | 17.0 % | 0.0059461 ±0.0001730   | 0.0286535 ±0.0061361   | 0.0346977 ±0.0065438   | 0.0135416 ±0.0060794   | 1.3089550 ±0.0143137   |
| 20F11233            | 17.0 % | 0.0059461 ±0.0001730   | 0.0286535 ±0.0061361   | 0.0346977 ±0.0065438   | 0.0135416 ±0.0060794   | 1.3089550 ±0.0143137   |
| 20F11235            | 17.0 % | 0.0057386 ±0.0001698   | 0.0231653 ±0.0056225   | 0.0262293 ±0.0065894   | 0.0117845 ±0.0066250   | 1.2545105 ±0.0156271   |
| 20F11236            | 17.0 % | 0.0057386 ±0.0001698   | 0.0231653 ±0.0056225   | 0.0262293 ±0.0065894   | 0.0117845 ±0.0066250   | 1.2545105 ±0.0156271   |
| 20F11238            | 17.0 % | 0.0063334 ±0.0001649   | 0.0203706 ±0.0055212   | 0.0129147 ±0.0066817   | 0.0079568 ±0.0057206   | 1.4607849 ±0.0156443   |
| 20F11239            | 17.0 % | 0.0063334 ±0.0001649   | 0.0203706 ±0.0055212   | 0.0129147 ±0.0066817   | 0.0079568 ±0.0057206   | 1.4607849 ±0.0156443   |
| 20F11241            | 17.0 % | 0.0055036 ±0.0001860   | 0.0252188 ±0.0058883   | 0.0224767 ±0.0070869   | 0.0159234 ±0.0062692   | 1.2180405 ±0.0152834   |
| 20F11242            | 17.0 % | 0.0055036 ±0.0001860   | 0.0252188 ±0.0058883   | 0.0224767 ±0.0070869   | 0.0159234 ±0.0062692   | 1.2180405 ±0.0152834   |
| 20F11244            | 17.0 % | 0.0060163 ±0.0001693   | 0.0274667 ±0.0062097   | 0.0275750 ±0.0062748   | 0.0134865 ±0.0064826   | 1.3584527 ±0.0164564   |
| 20F11245            | 17.0 % | 0.0060163 ±0.0001693   | 0.0274667 ±0.0062097   | 0.0275750 ±0.0062748   | 0.0134865 ±0.0064826   | 1.3584527 ±0.0164564   |
| 20F11247            | 17.0 % | 0.0060774 ±0.0001791   | 0.0305595 ±0.0059444   | 0.0176568 ±0.0059191   | 0.0044205 ±0.0067199   | 1.2961162 ±0.0142317   |
| 20F11248            | 17.0 % | 0.0060774 ±0.0001791   | 0.0305595 ±0.0059444   | 0.0176568 ±0.0059191   | 0.0044205 ±0.0067199   | 1.2961162 ±0.0142317   |
| 20F11250            | 17.0 % | 0.0060163 ±0.0001693   | 0.0274667 ±0.0062097   | 0.0275750 ±0.0062748   | 0.0134865 ±0.0064826   | 1.3584527 ±0.0164564   |
| 20F11251            | 17.0 % | 0.0060163 ±0.0001693   | 0.0274667 ±0.0062097   | 0.0275750 ±0.0062748   | 0.0134865 ±0.0064826   | 1.3584527 ±0.0164564   |
| 20F11253            | 17.0 % | 0.0060774 ±0.0001791   | 0.0305595 ±0.0059444   | 0.0176568 ±0.0059191   | 0.0044205 ±0.0067199   | 1.2961162 ±0.0142317   |
| 20F11254            | 17.0 % | 0.0060774 ±0.0001791   | 0.0305595 ±0.0059444   | 0.0176568 ±0.0059191   | 0.0044205 ±0.0067199   | 1.2961162 ±0.0142317   |
| 20F11256            | 17.0 % | 0.0054460 ±0.0001849   | 0.0202064 ±0.0053504   | 0.0265649 ±0.0075278   | 0.0145359 ±0.0065282   | 1.1690005 ±0.0134993   |
| 20F11257            | 17.0 % | 0.0054460 ±0.0001849   | 0.0202064 ±0.0053504   | 0.0265649 ±0.0075278   | 0.0145359 ±0.0065282   | 1.1690005 ±0.0134993   |

| Intercept Values |        | 36Ar ± 1σ (SE)<br>[fA] | r2     | Regression<br>(type,n) | 37Ar ± 1σ (SE)<br>[fA] | r2     | Regression<br>(type,n) | 38Ar ± 1σ (SE)<br>[fA] | r2     | Regression<br>(type,n) | 39Ar ± 1σ (SE)<br>[fA] | r2     | Regression<br>(type,n) | 40Ar ± 1σ (SE)<br>[fA] |
|------------------|--------|------------------------|--------|------------------------|------------------------|--------|------------------------|------------------------|--------|------------------------|------------------------|--------|------------------------|------------------------|
| 20F11214         | 17.0 % | 0.0077237 ±0.0002182   | 0.9814 | EXP 149 of 150         | 1.0999525 ±0.0060477   | 0.8077 | EXP 149 of 150         | 1.5791135 ±0.0059729   | 0.8832 | EXP 146 of 150         | 133.38510 ±0.01641     | 0.9999 | EXP 150 of 150         | 511.58502 ±0.03445     |
| 20F11215         | 17.0 % | 0.0091197 ±0.0002327   | 0.9800 | EXP 150 of 150         | 1.4445610 ±0.0059445   | 0.8665 | EXP 150 of 150         | 2.1513195 ±0.0064227   | 0.9265 | EXP 148 of 150         | 181.70791 ±0.01813     | 0.9999 | EXP 149 of 150         | 696.29653 ±0.04249     |
| 20F11217         | 17.0 % | 0.0074773 ±0.0002041   | 0.9709 | EXP 147 of 150         | 0.8242931 ±0.0064068   | 0.6677 | EXP 150 of 150         | 1.2060083 ±0.0064634   | 0.8135 | EXP 148 of 150         | 101.61279 ±0.01373     | 0.9998 | EXP 150 of 150         | 389.85008 ±0.03193     |
| 20F11218         | 17.0 % | 0.0196022 ±0.0002807   | 0.9709 | EXP 147 of 150         | 1.8209518 ±0.0058140   | 0.9208 | EXP 150 of 150         | 2.5809723 ±0.0066962   | 0.9377 | EXP 150 of 150         | 216.68410 ±0.01880     | 0.9999 | EXP 150 of 150         | 833.51611 ±0.04309     |
| 20F11220         | 17.0 % | 0.0157573 ±0.0002560   | 0.9696 | EXP 150 of 150         | 1.3454116 ±0.0053432   | 0.8754 | EXP 149 of 150         | 2.0615354 ±0.0064615   | 0.9196 | EXP 150 of 150         | 172.64589 ±0.01661     | 0.9999 | EXP 149 of 150         | 663.35418 ±0.03808     |
| 20F11221         | 17.0 % | 0.0078368 ±0.0002203   | 0.9793 | EXP 150 of 150         | 1.4101365 ±0.0058735   | 0.8683 | EXP 150 of 150         | 1.9778064 ±0.0070060   | 0.8947 | EXP 149 of 150         | 167.07439 ±0.01635     | 0.9999 | EXP 147 of 150         | 640.38575 ±0.03884     |
| 20F11223         | 17.0 % | 0.0112153 ±0.0002405   | 0.9733 | EXP 149 of 150         | 1.5182377 ±0.0056274   | 0.8873 | EXP 146 of 150         | 2.0737260 ±0.0055176   | 0.9372 | EXP 150 of 150         | 173.83838 ±0.01627     | 0.9999 | EXP 148 of 150         | 666.82797 ±0.03849     |
| 20F11224         | 17.0 % | 0.0074606 ±0.0002097   | 0.9760 | EXP 147 of 150         | 1.0493454 ±0.0060376   | 0.7943 | EXP 150 of 150         | 1.5885071 ±0.0064663   | 0.8695 | EXP 148 of 150         | 134.51834 ±0.01683     | 0.9999 | EXP 150 of 150         | 515.30871 ±0.03419     |
| 20F11226         | 17.0 % | 0.0105625 ±0.0002293   | 0.9723 | EXP 150 of 150         | 1.1753316 ±0.0054321   | 0.8657 | EXP 148 of 150         | 1.7946829 ±0.0067251   | 0.8839 | EXP 149 of 150         | 153.10378 ±0.01771     | 0.9999 | EXP 150 of 150         | 587.45188 ±0.03576     |
| 20F11227         | 17.0 % | 0.0124599 ±0.0002377   | 0.9633 | EXP 149 of 150         | 1.1445935 ±0.0065160   | 0.7712 | EXP 150 of 150         | 1.4331242 ±0.0064869   | 0.8404 | EXP 150 of 150         | 121.04046 ±0.01564     | 0.9998 | EXP 150 of 150         | 465.12158 ±0.03234     |
| 20F11229         | 17.0 % | 0.0092564 ±0.0002365   | 0.9673 | EXP 150 of 150         | 1.0370674 ±0.0062792   | 0.7603 | EXP 149 of 150         | 1.5705085 ±0.0064833   | 0.8597 | EXP 148 of 150         | 132.92303 ±0.01603     | 0.9999 | EXP 150 of 150         | 510.58362 ±0.03356     |
| 20F11230         | 17.0 % | 0.0100989 ±0.0002498   | 0.9636 | EXP 149 of 150         | 1.1787231 ±0.0057198   | 0.8313 | EXP 149 of 150         | 1.6604228 ±0.0071518   | 0.8519 | EXP 150 of 150         | 141.09409 ±0.01546     | 0.9999 | EXP 150 of 150         | 541.94389 ±0.03192     |
| 20F11232         | 17.0 % | 0.0082863 ±0.0001958   | 0.9746 | EXP 149 of 150         | 1.0249645 ±0.0065335   | 0.7437 | EXP 150 of 150         | 1.4116549 ±0.0064794   | 0.8272 | EXP 150 of 150         | 120.17666 ±0.01418     | 0.9999 | EXP 150 of 150         | 460.94939 ±0.03185     |
| 20F11233         | 17.0 % | 0.0070199 ±0.0002340   | 0.9711 | EXP 150 of 150         | 1.1755215 ±0.0055288   | 0.8516 | EXP 150 of 150         | 1.7291025 ±0.0065711   | 0.8896 | EXP 150 of 150         | 145.25576 ±0.01441     | 0.9999 | EXP 150 of 150         | 556.62342 ±0.03545     |
| 20F11235         | 17.0 % | 0.0082577 ±0.0001975   | 0.9767 | EXP 149 of 150         | 1.1100571 ±0.0060798   | 0.8004 | EXP 149 of 150         | 1.4995024 ±0.0062845   | 0.8589 | EXP 148 of 150         | 128.60948 ±0.01543     | 0.9999 | EXP 149 of 150         | 493.27450 ±0.03309     |
| 20F11236         | 17.0 % | 0.0098130 ±0.0002589   | 0.9552 | EXP 150 of 150         | 0.9859255 ±0.0064736   | 0.7103 | EXP 150 of 150         | 1.3242853 ±0.0069292   | 0.8056 | EXP 150 of 150         | 111.93539 ±0.01476     | 0.9998 | EXP 150 of 150         | 430.24389 ±0.02946     |
| 20F11238         | 17.0 % | 0.0113024 ±0.0002571   | 0.9603 | EXP 150 of 150         | 1.2540586 ±0.0052981   | 0.8680 | EXP 150 of 150         | 1.6982025 ±0.0068624   | 0.8681 | EXP 150 of 150         | 142.79474 ±0.01583     | 0.9999 | EXP 150 of 150         | 548.66444 ±0.03486     |
| 20F11239         | 17.0 % | 0.0070265 ±0.0001986   | 0.9711 | EXP 150 of 150         | 0.8513023 ±0.0054829   | 0.7309 | EXP 149 of 150         | 1.2089105 ±0.0070998   | 0.7545 | EXP 149 of 150         | 101.82475 ±0.01277     | 0.9999 | EXP 150 of 150         | 390.48925 ±0.02985     |
| 20F11241         | 17.0 % | 0.0059612 ±0.0002108   | 0.9588 | EXP 150 of 150         | 0.5552064 ±0.0061811   | 0.5137 | EXP 150 of 150         | 0.8167327 ±0.0064968   | 0.6817 | EXP 148 of 150         | 69.67871 ±0.01090      | 0.9998 | EXP 147 of 150         | 267.22914 ±0.02926     |
| 20F11242         | 17.0 % | 0.0061060 ±0.0002058   | 0.9609 | EXP 150 of 150         | 0.5709617 ±0.0062564   | 0.4666 | EXP 150 of 150         | 0.9028519 ±0.0069088   | 0.6045 | EXP 150 of 150         | 77.47060 ±0.01182      | 0.9998 | EXP 150 of 150         | 297.66765 ±0.02967     |
| 20F11244         | 17.0 % | 0.0070616 ±0.0002316   | 0.9527 | EXP 150 of 150         | 0.7025283 ±0.0056176   | 0.6551 | EXP 150 of 150         | 0.9592586 ±0.0076719   | 0.6191 | EXP 150 of 150         | 82.30013 ±0.01238      | 0.9998 | EXP 149 of 150         | 316.38583 ±0.02799     |
| 20F11245         | 17.0 % | 0.0076860 ±0.0002404   | 0.9618 | EXP 150 of 150         | 0.9008165 ±0.0055633   | 0.7443 | EXP 148 of 150         | 1.3649922 ±0.0057847   | 0.8558 | EXP 146 of 150         | 116.56120 ±0.01399     | 0.9999 | EXP 150 of 150         | 447.18549 ±0.03132     |
| 20F11247         | 17.0 % | 0.0112705 ±0.0002529   | 0.9495 | EXP 150 of 150         | 0.8208730 ±0.0060876   | 0.7005 | EXP 147 of 150         | 1.2061479 ±0.0057765   | 0.8333 | EXP 150 of 150         | 101.71401 ±0.01486     | 0.9998 | EXP 147 of 150         | 392.06245 ±0.02647     |
| 20F11248         | 17.0 % | 0.0058171 ±0.0002060   | 0.9698 | EXP 150 of 150         | 0.7178870 ±0.0058370   | 0.6545 | EXP 150 of 150         | 1.2538438 ±0.0068666   | 0.7891 | EXP 150 of 150         | 106.78573 ±0.01494     | 0.9998 | EXP 150 of 150         | 409.57960 ±0.02998     |
| 20F11250         | 17.0 % | 0.0130117 ±0.0002237   | 0.9560 | EXP 150 of 150         | 0.8844519 ±0.0057910   | 0.7368 | EXP 150 of 150         | 1.2502581 ±0.0068139   | 0.7849 | EXP 150 of 150         | 106.73481 ±0.01330     | 0.9999 | EXP 150 of 150         | 411.50414 ±0.03234     |
| 20F11251         | 17.0 % | 0.0058444 ±0.0002239   | 0.9657 | EXP 150 of 150         | 0.9478789 ±0.0057346   | 0.7858 | EXP 149 of 150         | 1.2754714 ±0.0064330   | 0.8078 | EXP 150 of 150         | 109.24275 ±0.01499     | 0.9998 | EXP 148 of 150         | 418.39639 ±0.03169     |
| 20F11253         | 17.0 % | 0.0060454 ±0.0001873   | 0.9664 | EXP 150 of 150         | 0.5630743 ±0.0056161   | 0.5796 | EXP 150 of 150         | 0.8132631 ±0.0063725   | 0.6063 | EXP 148 of 150         | 70.21162 ±0.01191      | 0.9997 | EXP 150 of 150         | 269.17176 ±0.02882     |
| 20F11254         | 17.0 % | 0.0058329 ±0.0001968   | 0.9620 | EXP 150 of 150         | 0.5156723 ±0.0056644   | 0.5126 | EXP 150 of 150         | 0.8130450 ±0.0075206   | 0.5405 | EXP 150 of 150         | 71.35684 ±0.01229      | 0.9997 | EXP 150 of 150         | 274.73123 ±0.02837     |
| 20F11256         | 17.0 % | 0.0082865 ±0.0002258   | 0.9596 | EXP 150 of 150         | 0.8427633 ±0.0060759   | 0.6620 | EXP 150 of 150         | 1.2482175 ±0.0069093   | 0.7770 | EXP 149 of 150         | 105.91966 ±0.01460     | 0.9998 | EXP 150 of 150         | 406.48871 ±0.02990     |
| 20F11257         | 17.0 % | 0.0105290 ±0.0002322   | 0.9693 | EXP 150 of 150         | 1.2439716 ±0.0061538   | 0.8335 | EXP 149 of 150         | 1.7806517 ±0.0067097   | 0.8736 | EXP 150 of 150         | 151.31680 ±0.01463     | 0.9999 | EXP 147 of 150         | 580.69645 ±0.03505     |

| r2     | Regression<br>(ttype,n) |            |
|--------|-------------------------|------------|
| 0.9999 | EXP                     | 150 of 150 |
| 1.0000 | EXP                     | 150 of 150 |
| 0.9999 | EXP                     | 150 of 150 |
| 1.0000 | EXP                     | 150 of 150 |
| 1.0000 | EXP                     | 150 of 150 |
| 1.0000 | EXP                     | 150 of 150 |
| 1.0000 | EXP                     | 150 of 150 |
| 0.9999 | EXP                     | 148 of 150 |
| 1.0000 | EXP                     | 150 of 150 |
| 0.9999 | EXP                     | 150 of 150 |
| 0.9999 | EXP                     | 148 of 150 |
| 1.0000 | EXP                     | 150 of 150 |
| 0.9999 | EXP                     | 148 of 150 |
| 1.0000 | EXP                     | 147 of 150 |
| 0.9999 | EXP                     | 150 of 150 |
| 0.9999 | EXP                     | 149 of 150 |
| 1.0000 | EXP                     | 150 of 150 |
| 0.9999 | EXP                     | 148 of 150 |
| 0.9998 | EXP                     | 150 of 150 |
| 0.9999 | EXP                     | 150 of 150 |
| 0.9999 | EXP                     | 150 of 150 |
| 0.9999 | EXP                     | 150 of 150 |
| 0.9999 | EXP                     | 147 of 150 |
| 0.9999 | EXP                     | 147 of 150 |
| 0.9999 | EXP                     | 150 of 150 |
| 0.9999 | EXP                     | 150 of 150 |
| 0.9998 | EXP                     | 150 of 150 |
| 0.9999 | EXP                     | 150 of 150 |
| 0.9999 | EXP                     | 150 of 150 |
| 1.0000 | EXP                     | 150 of 150 |

| Project Info |        | Analyst     | Irradiation | X-pos | Y-pos | Z/H-pos | Project                | Experiment | Nmb |
|--------------|--------|-------------|-------------|-------|-------|---------|------------------------|------------|-----|
| 20F11214     | 17.0 % | Dan Miggins | 20-OSU-01   | 0.00  | 0.00  | 37.95   | Oregon\Swenton (18-58) | 20F11209   | 01  |
| 20F11215     | 17.0 % | Dan Miggins | 20-OSU-01   | 0.00  | 0.00  | 37.95   | Oregon\Swenton (18-58) | 20F11209   | 01  |
| 20F11217     | 17.0 % | Dan Miggins | 20-OSU-01   | 0.00  | 0.00  | 37.95   | Oregon\Swenton (18-58) | 20F11209   | 01  |
| 20F11218     | 17.0 % | Dan Miggins | 20-OSU-01   | 0.00  | 0.00  | 37.95   | Oregon\Swenton (18-58) | 20F11209   | 01  |
| 20F11220     | 17.0 % | Dan Miggins | 20-OSU-01   | 0.00  | 0.00  | 37.95   | Oregon\Swenton (18-58) | 20F11209   | 01  |
| 20F11221     | 17.0 % | Dan Miggins | 20-OSU-01   | 0.00  | 0.00  | 37.95   | Oregon\Swenton (18-58) | 20F11209   | 01  |
| 20F11223     | 17.0 % | Dan Miggins | 20-OSU-01   | 0.00  | 0.00  | 37.95   | Oregon\Swenton (18-58) | 20F11209   | 01  |
| 20F11224     | 17.0 % | Dan Miggins | 20-OSU-01   | 0.00  | 0.00  | 37.95   | Oregon\Swenton (18-58) | 20F11209   | 01  |
| 20F11226     | 17.0 % | Dan Miggins | 20-OSU-01   | 0.00  | 0.00  | 37.95   | Oregon\Swenton (18-58) | 20F11209   | 01  |
| 20F11227     | 17.0 % | Dan Miggins | 20-OSU-01   | 0.00  | 0.00  | 37.95   | Oregon\Swenton (18-58) | 20F11209   | 01  |
| 20F11229     | 17.0 % | Dan Miggins | 20-OSU-01   | 0.00  | 0.00  | 37.95   | Oregon\Swenton (18-58) | 20F11209   | 01  |
| 20F11230     | 17.0 % | Dan Miggins | 20-OSU-01   | 0.00  | 0.00  | 37.95   | Oregon\Swenton (18-58) | 20F11209   | 01  |
| 20F11232     | 17.0 % | Dan Miggins | 20-OSU-01   | 0.00  | 0.00  | 37.95   | Oregon\Swenton (18-58) | 20F11209   | 01  |
| 20F11233     | 17.0 % | Dan Miggins | 20-OSU-01   | 0.00  | 0.00  | 37.95   | Oregon\Swenton (18-58) | 20F11209   | 01  |
| 20F11235     | 17.0 % | Dan Miggins | 20-OSU-01   | 0.00  | 0.00  | 37.95   | Oregon\Swenton (18-58) | 20F11209   | 01  |
| 20F11236     | 17.0 % | Dan Miggins | 20-OSU-01   | 0.00  | 0.00  | 37.95   | Oregon\Swenton (18-58) | 20F11209   | 01  |
| 20F11238     | 17.0 % | Dan Miggins | 20-OSU-01   | 0.00  | 0.00  | 37.95   | Oregon\Swenton (18-58) | 20F11209   | 01  |
| 20F11239     | 17.0 % | Dan Miggins | 20-OSU-01   | 0.00  | 0.00  | 37.95   | Oregon\Swenton (18-58) | 20F11209   | 01  |
| 20F11241     | 17.0 % | Dan Miggins | 20-OSU-01   | 0.00  | 0.00  | 37.95   | Oregon\Swenton (18-58) | 20F11209   | 01  |
| 20F11242     | 17.0 % | Dan Miggins | 20-OSU-01   | 0.00  | 0.00  | 37.95   | Oregon\Swenton (18-58) | 20F11209   | 01  |
| 20F11244     | 17.0 % | Dan Miggins | 20-OSU-01   | 0.00  | 0.00  | 37.95   | Oregon\Swenton (18-58) | 20F11209   | 01  |
| 20F11245     | 17.0 % | Dan Miggins | 20-OSU-01   | 0.00  | 0.00  | 37.95   | Oregon\Swenton (18-58) | 20F11209   | 01  |
| 20F11247     | 17.0 % | Dan Miggins | 20-OSU-01   | 0.00  | 0.00  | 37.95   | Oregon\Swenton (18-58) | 20F11209   | 01  |
| 20F11248     | 17.0 % | Dan Miggins | 20-OSU-01   | 0.00  | 0.00  | 37.95   | Oregon\Swenton (18-58) | 20F11209   | 01  |
| 20F11250     | 17.0 % | Dan Miggins | 20-OSU-01   | 0.00  | 0.00  | 37.95   | Oregon\Swenton (18-58) | 20F11209   | 01  |
| 20F11251     | 17.0 % | Dan Miggins | 20-OSU-01   | 0.00  | 0.00  | 37.95   | Oregon\Swenton (18-58) | 20F11209   | 01  |
| 20F11253     | 17.0 % | Dan Miggins | 20-OSU-01   | 0.00  | 0.00  | 37.95   | Oregon\Swenton (18-58) | 20F11209   | 01  |
| 20F11254     | 17.0 % | Dan Miggins | 20-OSU-01   | 0.00  | 0.00  | 37.95   | Oregon\Swenton (18-58) | 20F11209   | 01  |
| 20F11256     | 17.0 % | Dan Miggins | 20-OSU-01   | 0.00  | 0.00  | 37.95   | Oregon\Swenton (18-58) | 20F11209   | 01  |
| 20F11257     | 17.0 % | Dan Miggins | 20-OSU-01   | 0.00  | 0.00  | 37.95   | Oregon\Swenton (18-58) | 20F11209   | 01  |

| OSU Argon Geochronology Lab<br>CEOAS Oregon State University, Corvallis, USA |        |          |          |                   |                  |                  |       |                     |                    |       |            |       |               |       |           |       |              |                        |     |       |      |      |     |        |
|------------------------------------------------------------------------------|--------|----------|----------|-------------------|------------------|------------------|-------|---------------------|--------------------|-------|------------|-------|---------------|-------|-----------|-------|--------------|------------------------|-----|-------|------|------|-----|--------|
| Sample Parameters                                                            |        | Sample   | Material | Location          | Standard Name    | Standard (in Ma) | %1σ   | Standard Reference  | Standard 40Ar/39Ar | %1σ   | J          | %1σ   | Air 40Ar/36Ar | %1σ   | MDF (lin) | %1σ   | Volume Ratio | Sensitivity (mol/volt) | Day | Month | Year | Hour | Min | Resist |
| 20F11214                                                                     | 17.0 % | VS17-034 | Sanidine | Stockade Mountain | FCT-NM (1C28-20) | 28.201           | 0.082 | Kuiper et al (2008) | 9.48785            | 0.163 | 0.00163636 | 0.163 | 298.368       | 0.141 | 1.0001611 | 0.044 | 1            | 3.54E-14               | 28  | MAY   | 2020 | 6    | 7   | 1      |
| 20F11215                                                                     | 17.0 % | VS17-034 | Sanidine | Stockade Mountain | FCT-NM (1C28-20) | 28.201           | 0.082 | Kuiper et al (2008) | 9.48785            | 0.163 | 0.00163636 | 0.163 | 298.368       | 0.141 | 1.0001611 | 0.044 | 1            | 3.54E-14               | 28  | MAY   | 2020 | 6    | 15  | 1      |
| 20F11217                                                                     | 17.0 % | VS17-034 | Sanidine | Stockade Mountain | FCT-NM (1C28-20) | 28.201           | 0.082 | Kuiper et al (2008) | 9.48785            | 0.163 | 0.00163636 | 0.163 | 298.368       | 0.141 | 1.0001611 | 0.044 | 1            | 3.54E-14               | 28  | MAY   | 2020 | 6    | 32  | 1      |
| 20F11218                                                                     | 17.0 % | VS17-034 | Sanidine | Stockade Mountain | FCT-NM (1C28-20) | 28.201           | 0.082 | Kuiper et al (2008) | 9.48785            | 0.163 | 0.00163636 | 0.163 | 298.368       | 0.141 | 1.0001611 | 0.044 | 1            | 3.54E-14               | 28  | MAY   | 2020 | 6    | 41  | 1      |
| 20F11220                                                                     | 17.0 % | VS17-034 | Sanidine | Stockade Mountain | FCT-NM (1C28-20) | 28.201           | 0.082 | Kuiper et al (2008) | 9.48785            | 0.163 | 0.00163636 | 0.163 | 298.368       | 0.141 | 1.0001611 | 0.044 | 1            | 3.54E-14               | 28  | MAY   | 2020 | 6    | 58  | 1      |
| 20F11221                                                                     | 17.0 % | VS17-034 | Sanidine | Stockade Mountain | FCT-NM (1C28-20) | 28.201           | 0.082 | Kuiper et al (2008) | 9.48785            | 0.163 | 0.00163636 | 0.163 | 298.368       | 0.141 | 1.0001611 | 0.044 | 1            | 3.54E-14               | 28  | MAY   | 2020 | 7    | 7   | 1      |
| 20F11223                                                                     | 17.0 % | VS17-034 | Sanidine | Stockade Mountain | FCT-NM (1C28-20) | 28.201           | 0.082 | Kuiper et al (2008) | 9.48785            | 0.163 | 0.00163636 | 0.163 | 298.368       | 0.141 | 1.0001611 | 0.044 | 1            | 3.54E-14               | 28  | MAY   | 2020 | 7    | 24  | 1      |
| 20F11224                                                                     | 17.0 % | VS17-034 | Sanidine | Stockade Mountain | FCT-NM (1C28-20) | 28.201           | 0.082 | Kuiper et al (2008) | 9.48785            | 0.163 | 0.00163636 | 0.163 | 298.368       | 0.141 | 1.0001611 | 0.044 | 1            | 3.54E-14               | 28  | MAY   | 2020 | 7    | 32  | 1      |
| 20F11226                                                                     | 17.0 % | VS17-034 | Sanidine | Stockade Mountain | FCT-NM (1C28-20) | 28.201           | 0.082 | Kuiper et al (2008) | 9.48785            | 0.163 | 0.00163636 | 0.163 | 298.368       | 0.141 | 1.0001611 | 0.044 | 1            | 3.54E-14               | 28  | MAY   | 2020 | 7    | 50  | 1      |
| 20F11227                                                                     | 17.0 % | VS17-034 | Sanidine | Stockade Mountain | FCT-NM (1C28-20) | 28.201           | 0.082 | Kuiper et al (2008) | 9.48785            | 0.163 | 0.00163636 | 0.163 | 298.368       | 0.141 | 1.0001611 | 0.044 | 1            | 3.54E-14               | 28  | MAY   | 2020 | 7    | 58  | 1      |
| 20F11229                                                                     | 17.0 % | VS17-034 | Sanidine | Stockade Mountain | FCT-NM (1C28-20) | 28.201           | 0.082 | Kuiper et al (2008) | 9.48785            | 0.163 | 0.00163636 | 0.163 | 298.368       | 0.141 | 1.0001611 | 0.044 | 1            | 3.54E-14               | 28  | MAY   | 2020 | 8    | 15  | 1      |
| 20F11230                                                                     | 17.0 % | VS17-034 | Sanidine | Stockade Mountain | FCT-NM (1C28-20) | 28.201           | 0.082 | Kuiper et al (2008) | 9.48785            | 0.163 | 0.00163636 | 0.163 | 298.368       | 0.141 | 1.0001611 | 0.044 | 1            | 3.54E-14               | 28  | MAY   | 2020 | 8    | 24  | 1      |
| 20F11232                                                                     | 17.0 % | VS17-034 | Sanidine | Stockade Mountain | FCT-NM (1C28-20) | 28.201           | 0.082 | Kuiper et al (2008) | 9.48785            | 0.163 | 0.00163636 | 0.163 | 298.368       | 0.141 | 1.0001611 | 0.044 | 1            | 3.54E-14               | 28  | MAY   | 2020 | 8    | 41  | 1      |
| 20F11233                                                                     | 17.0 % | VS17-034 | Sanidine | Stockade Mountain | FCT-NM (1C28-20) | 28.201           | 0.082 | Kuiper et al (2008) | 9.48785            | 0.163 | 0.00163636 | 0.163 | 298.368       | 0.141 | 1.0001611 | 0.044 | 1            | 3.54E-14               | 28  | MAY   | 2020 | 8    | 50  | 1      |
| 20F11235                                                                     | 17.0 % | VS17-034 | Sanidine | Stockade Mountain | FCT-NM (1C28-20) | 28.201           | 0.082 | Kuiper et al (2008) | 9.48785            | 0.163 | 0.00163636 | 0.163 | 298.368       | 0.141 | 1.0001611 | 0.044 | 1            | 3.54E-14               | 28  | MAY   | 2020 | 9    | 7   | 1      |
| 20F11236                                                                     | 17.0 % | VS17-034 | Sanidine | Stockade Mountain | FCT-NM (1C28-20) | 28.201           | 0.082 | Kuiper et al (2008) | 9.48785            | 0.163 | 0.00163636 | 0.163 | 298.368       | 0.141 | 1.0001611 | 0.044 | 1            | 3.54E-14               | 28  | MAY   | 2020 | 9    | 15  | 1      |
| 20F11238                                                                     | 17.0 % | VS17-034 | Sanidine | Stockade Mountain | FCT-NM (1C28-20) | 28.201           | 0.082 | Kuiper et al (2008) | 9.48785            | 0.163 | 0.00163636 | 0.163 | 298.368       | 0.141 | 1.0001611 | 0.044 | 1            | 3.54E-14               | 28  | MAY   | 2020 | 9    | 33  | 1      |
| 20F11239                                                                     | 17.0 % | VS17-034 | Sanidine | Stockade Mountain | FCT-NM (1C28-20) | 28.201           | 0.082 | Kuiper et al (2008) | 9.48785            | 0.163 | 0.00163636 | 0.163 | 298.368       | 0.141 | 1.0001611 | 0.044 | 1            | 3.54E-14               | 28  | MAY   | 2020 | 9    | 41  | 1      |
| 20F11241                                                                     | 17.0 % | VS17-034 | Sanidine | Stockade Mountain | FCT-NM (1C28-20) | 28.201           | 0.082 | Kuiper et al (2008) | 9.48785            | 0.163 | 0.00163636 | 0.163 | 298.368       | 0.141 | 1.0001611 | 0.044 | 1            | 3.54E-14               | 28  | MAY   | 2020 | 9    | 58  | 1      |
| 20F11242                                                                     | 17.0 % | VS17-034 | Sanidine | Stockade Mountain | FCT-NM (1C28-20) | 28.201           | 0.082 | Kuiper et al (2008) | 9.48785            | 0.163 | 0.00163636 | 0.163 | 298.368       | 0.141 | 1.0001611 | 0.044 | 1            | 3.54E-14               | 28  | MAY   | 2020 | 10   | 7   | 1      |
| 20F11244                                                                     | 17.0 % | VS17-034 | Sanidine | Stockade Mountain | FCT-NM (1C28-20) | 28.201           | 0.082 | Kuiper et al (2008) | 9.48785            | 0.163 | 0.00163636 | 0.163 | 298.368       | 0.141 | 1.0001611 | 0.044 | 1            | 3.54E-14               | 28  | MAY   | 2020 | 10   | 24  | 1      |
| 20F11245                                                                     | 17.0 % | VS17-034 | Sanidine | Stockade Mountain | FCT-NM (1C28-20) | 28.201           | 0.082 | Kuiper et al (2008) | 9.48785            | 0.163 | 0.00163636 | 0.163 | 298.368       | 0.141 | 1.0001611 | 0.044 | 1            | 3.54E-14               | 28  | MAY   | 2020 | 10   | 33  | 1      |
| 20F11247                                                                     | 17.0 % | VS17-034 | Sanidine | Stockade Mountain | FCT-NM (1C28-20) | 28.201           | 0.082 | Kuiper et al (2008) | 9.48785            | 0.163 | 0.00163636 | 0.163 | 298.368       | 0.141 | 1.0001611 | 0.044 | 1            | 3.54E-14               | 28  | MAY   | 2020 | 10   | 50  | 1      |
| 20F11248                                                                     | 17.0 % | VS17-034 | Sanidine | Stockade Mountain | FCT-NM (1C28-20) | 28.201           | 0.082 | Kuiper et al (2008) | 9.48785            | 0.163 | 0.00163636 | 0.163 | 298.368       | 0.141 | 1.0001611 | 0.044 | 1            | 3.54E-14               | 28  | MAY   | 2020 | 10   | 58  | 1      |
| 20F11250                                                                     | 17.0 % | VS17-034 | Sanidine | Stockade Mountain | FCT-NM (1C28-20) | 28.201           | 0.082 | Kuiper et al (2008) | 9.48785            | 0.163 | 0.00163636 | 0.163 | 298.368       | 0.141 | 1.0001611 | 0.044 | 1            | 3.54E-14               | 28  | MAY   | 2020 | 11   | 16  | 1      |
| 20F11251                                                                     | 17.0 % | VS17-034 | Sanidine | Stockade Mountain | FCT-NM (1C28-20) | 28.201           | 0.082 | Kuiper et al (2008) | 9.48785            | 0.163 | 0.00163636 | 0.163 | 298.368       | 0.141 | 1.0001611 | 0.044 | 1            | 3.54E-14               | 28  | MAY   | 2020 | 11   | 24  | 1      |
| 20F11253                                                                     | 17.0 % | VS17-034 | Sanidine | Stockade Mountain | FCT-NM (1C28-20) | 28.201           | 0.082 | Kuiper et al (2008) | 9.48785            | 0.163 | 0.00163636 | 0.163 | 298.368       | 0.141 | 1.0001611 | 0.044 | 1            | 3.54E-14               | 28  | MAY   | 2020 | 11   | 41  | 1      |
| 20F11254                                                                     | 17.0 % | VS17-034 | Sanidine | Stockade Mountain | FCT-NM (1C28-20) | 28.201           | 0.082 | Kuiper et al (2008) | 9.48785            | 0.163 | 0.00163636 | 0.163 | 298.368       | 0.141 | 1.0001611 | 0.044 | 1            | 3.54E-14               | 28  | MAY   | 2020 | 11   | 50  | 1      |
| 20F11256                                                                     | 17.0 % | VS17-034 | Sanidine | Stockade Mountain | FCT-NM (1C28-20) | 28.201           | 0.082 | Kuiper et al (2008) | 9.48785            | 0.163 | 0.00163636 | 0.163 | 298.368       | 0.141 | 1.0001611 | 0.044 | 1            | 3.54E-14               | 28  | MAY   | 2020 | 12   | 7   | 1      |
| 20F11257                                                                     | 17.0 % | VS17-034 | Sanidine | Stockade Mountain | FCT-NM (1C28-20) | 28.201           | 0.082 | Kuiper et al (2008) | 9.48785            | 0.163 | 0.00163636 | 0.163 | 298.368       | 0.141 | 1.0001611 | 0.044 | 1            | 3.54E-14               | 28  | MAY   | 2020 | 12   | 16  | 1      |





20F11209.AGE >>> VS17-034 >>> OREGON | SWENTON (18-58) PROJECT

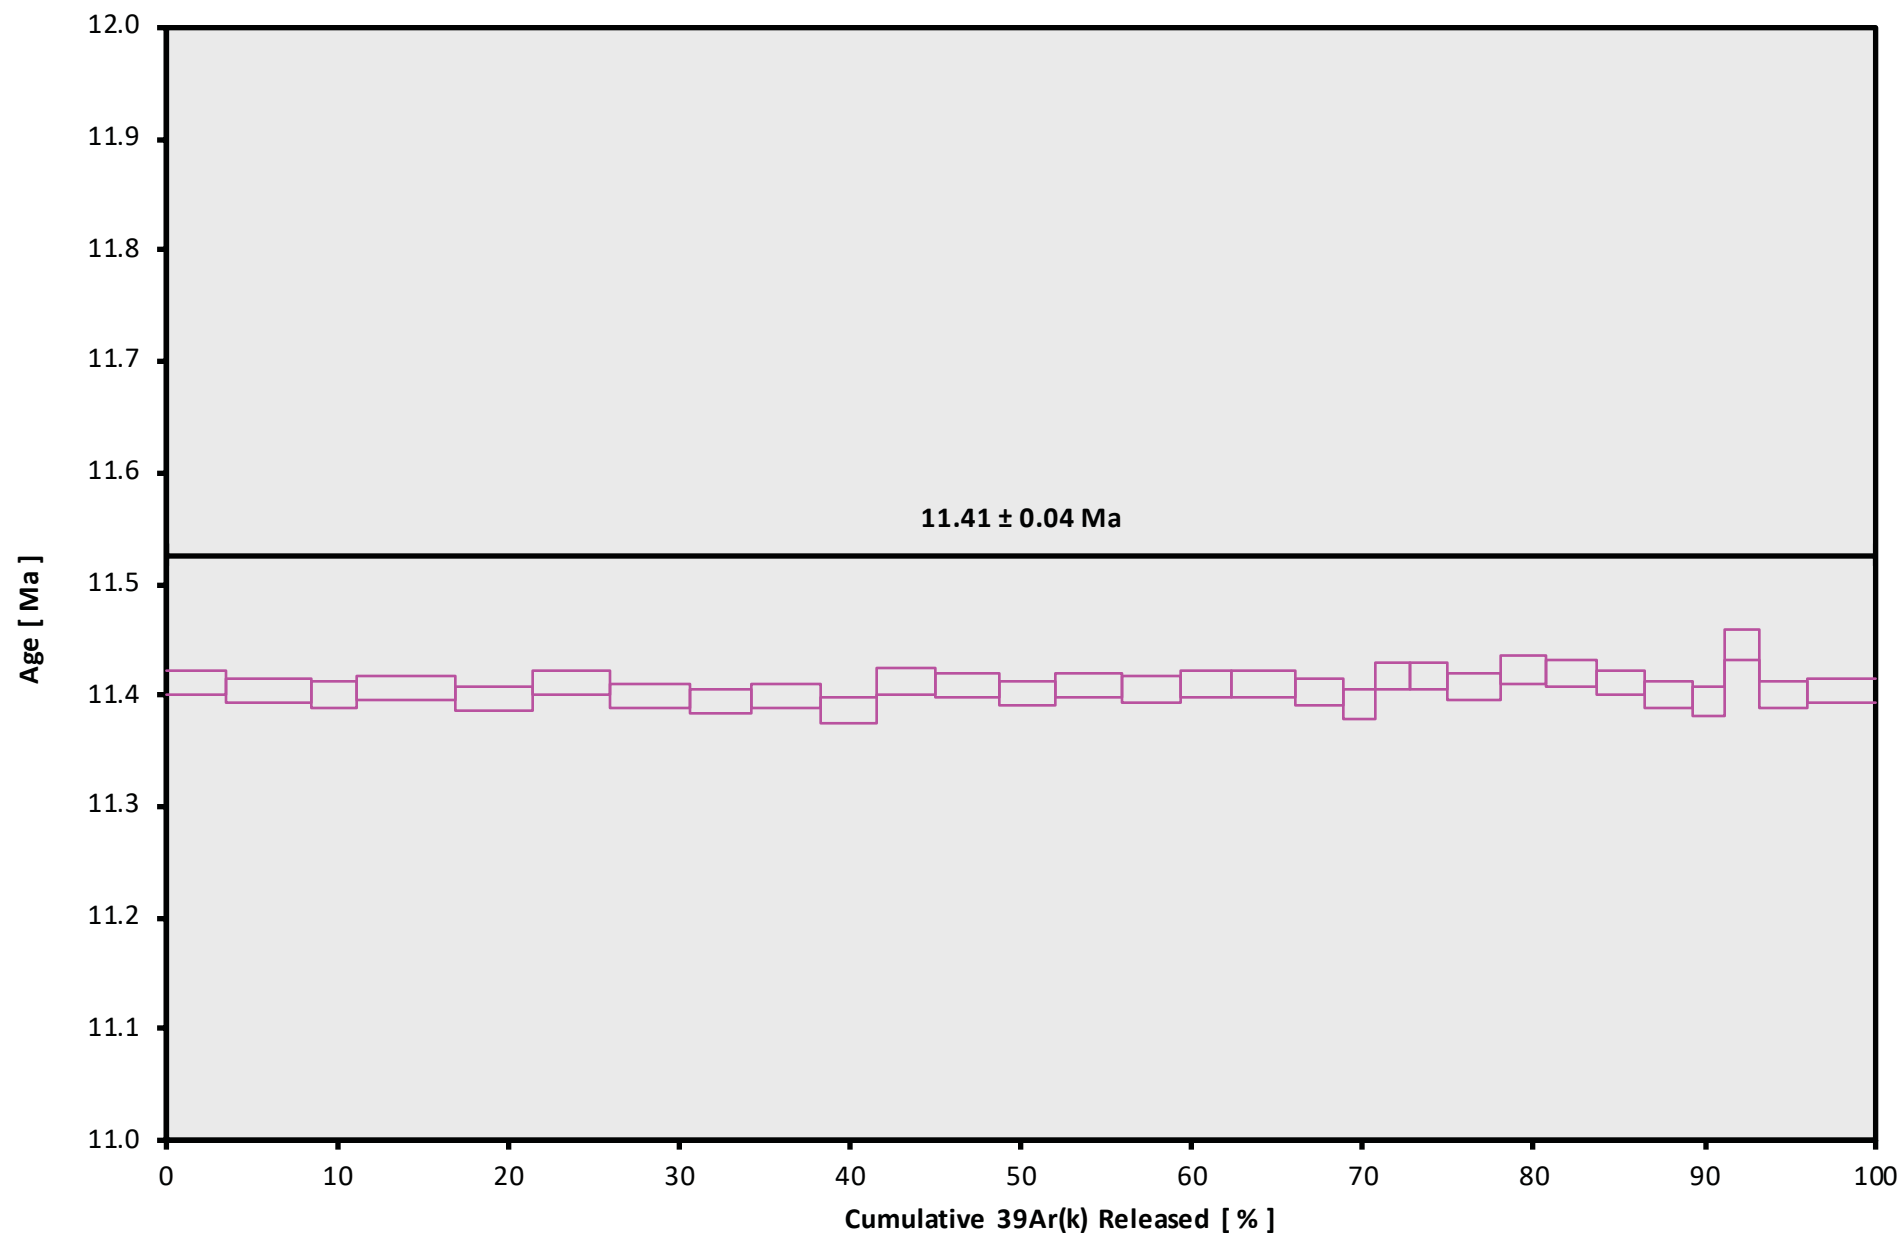

Ar-Ages in Ma

WEIGHTED PLATEAU

$11.41 \pm 0.04$

TOTAL FUSION

$11.41 \pm 0.04$

NORMAL ISOCHRON

$11.40 \pm 0.04$

INVERSE ISOCHRON

$11.41 \pm 0.04$

MSWD (PROBABILITY)

2.02 (0%)

Sample Info

Sanidine

Stockade Mountain

Dan Miggins

IRR = 20-OSU-01 (1C28-

## 20F11209.AGE >>> VS17-034 >>> OREGON | SWENTON (18-58) PROJECT

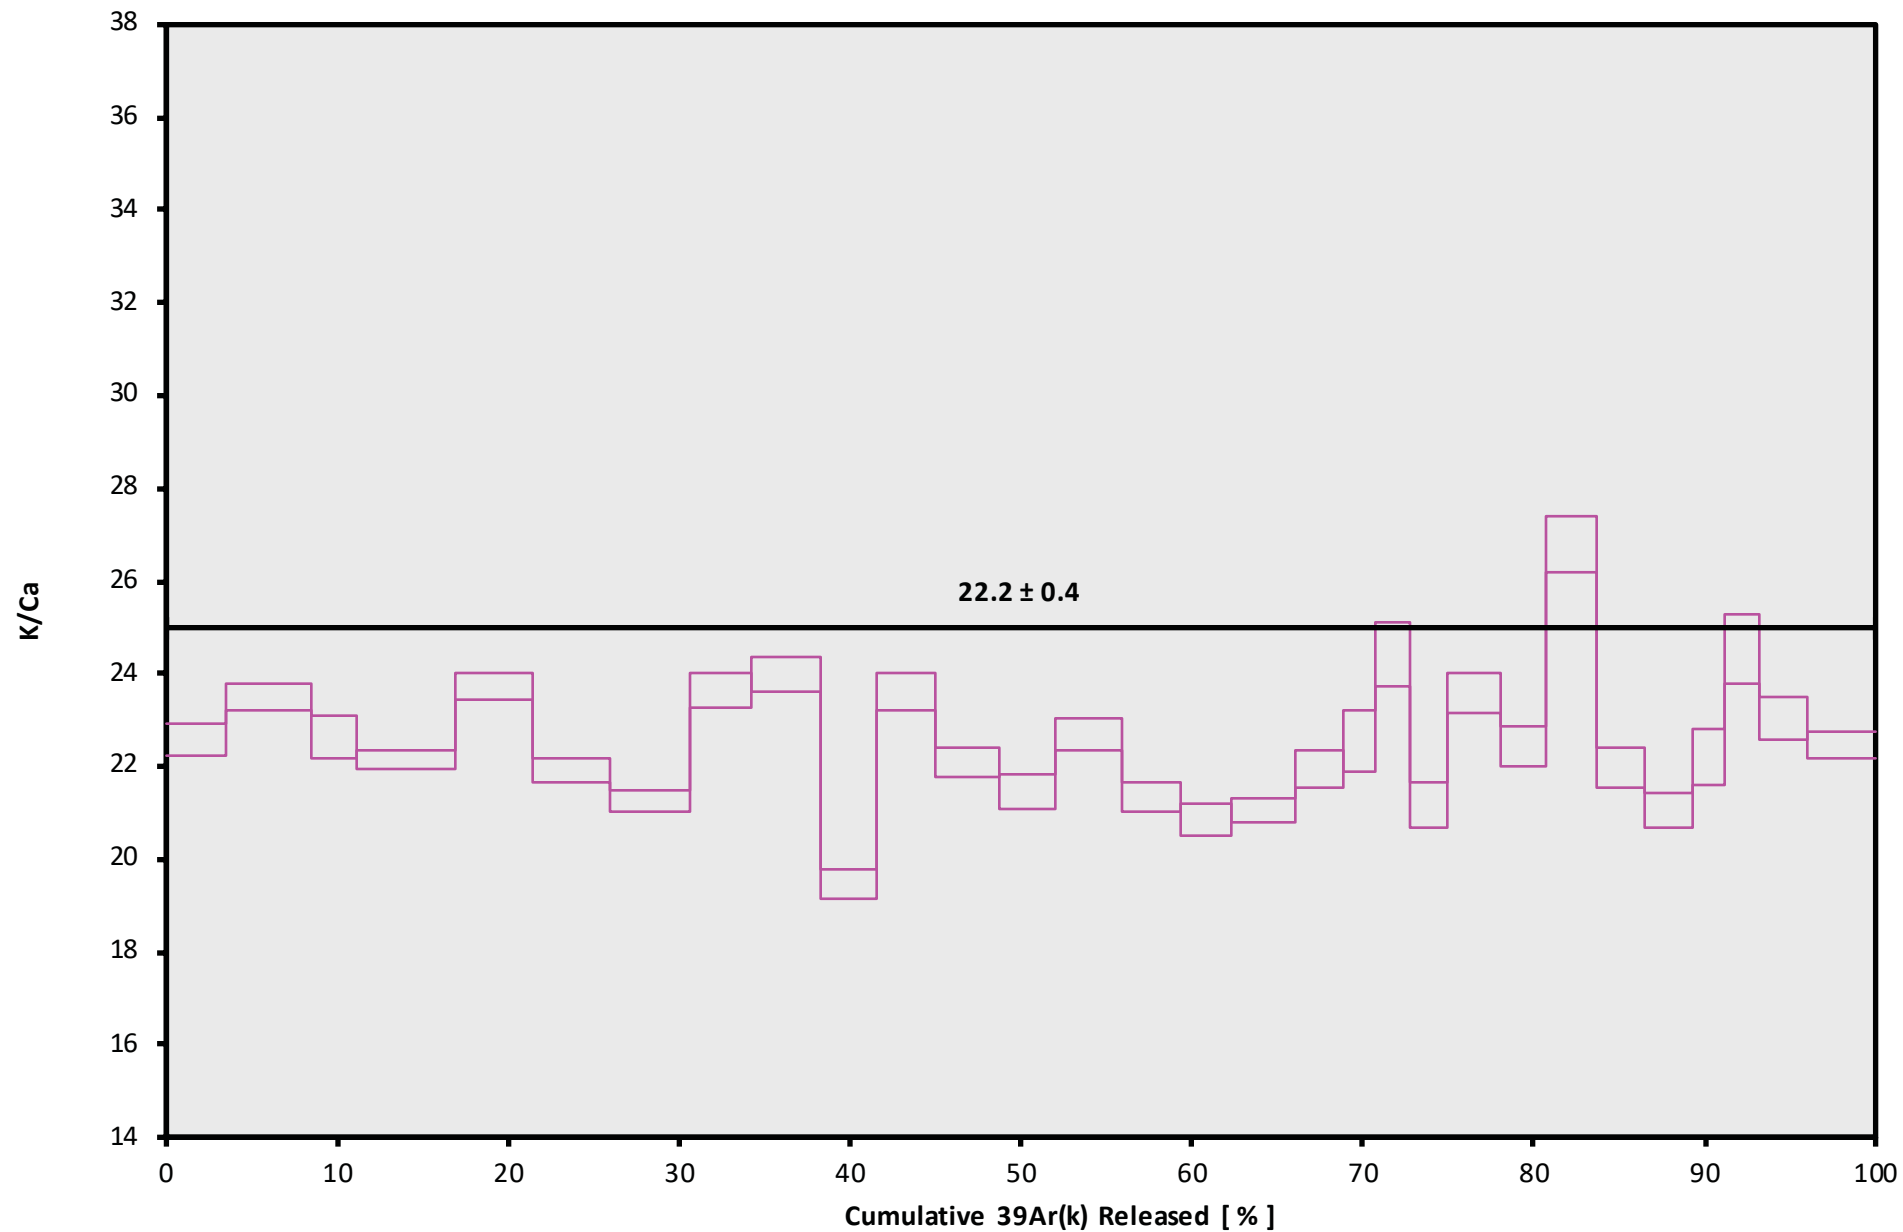

### Ar-Ages in Ma

#### WEIGHTED PLATEAU

11.41 ± 0.04

#### TOTAL FUSION

11.41 ± 0.04

#### NORMAL ISOCHRON

11.40 ± 0.04

#### INVERSE ISOCHRON

11.41 ± 0.04

### Sample Info

Sanidine

Stockade Mountain

Dan Miggins

IRR = 20-OSU-01 (1C28-

20F11209.AGE >>> VS17-034 >>> OREGON | SWENTON (18-58) PROJECT

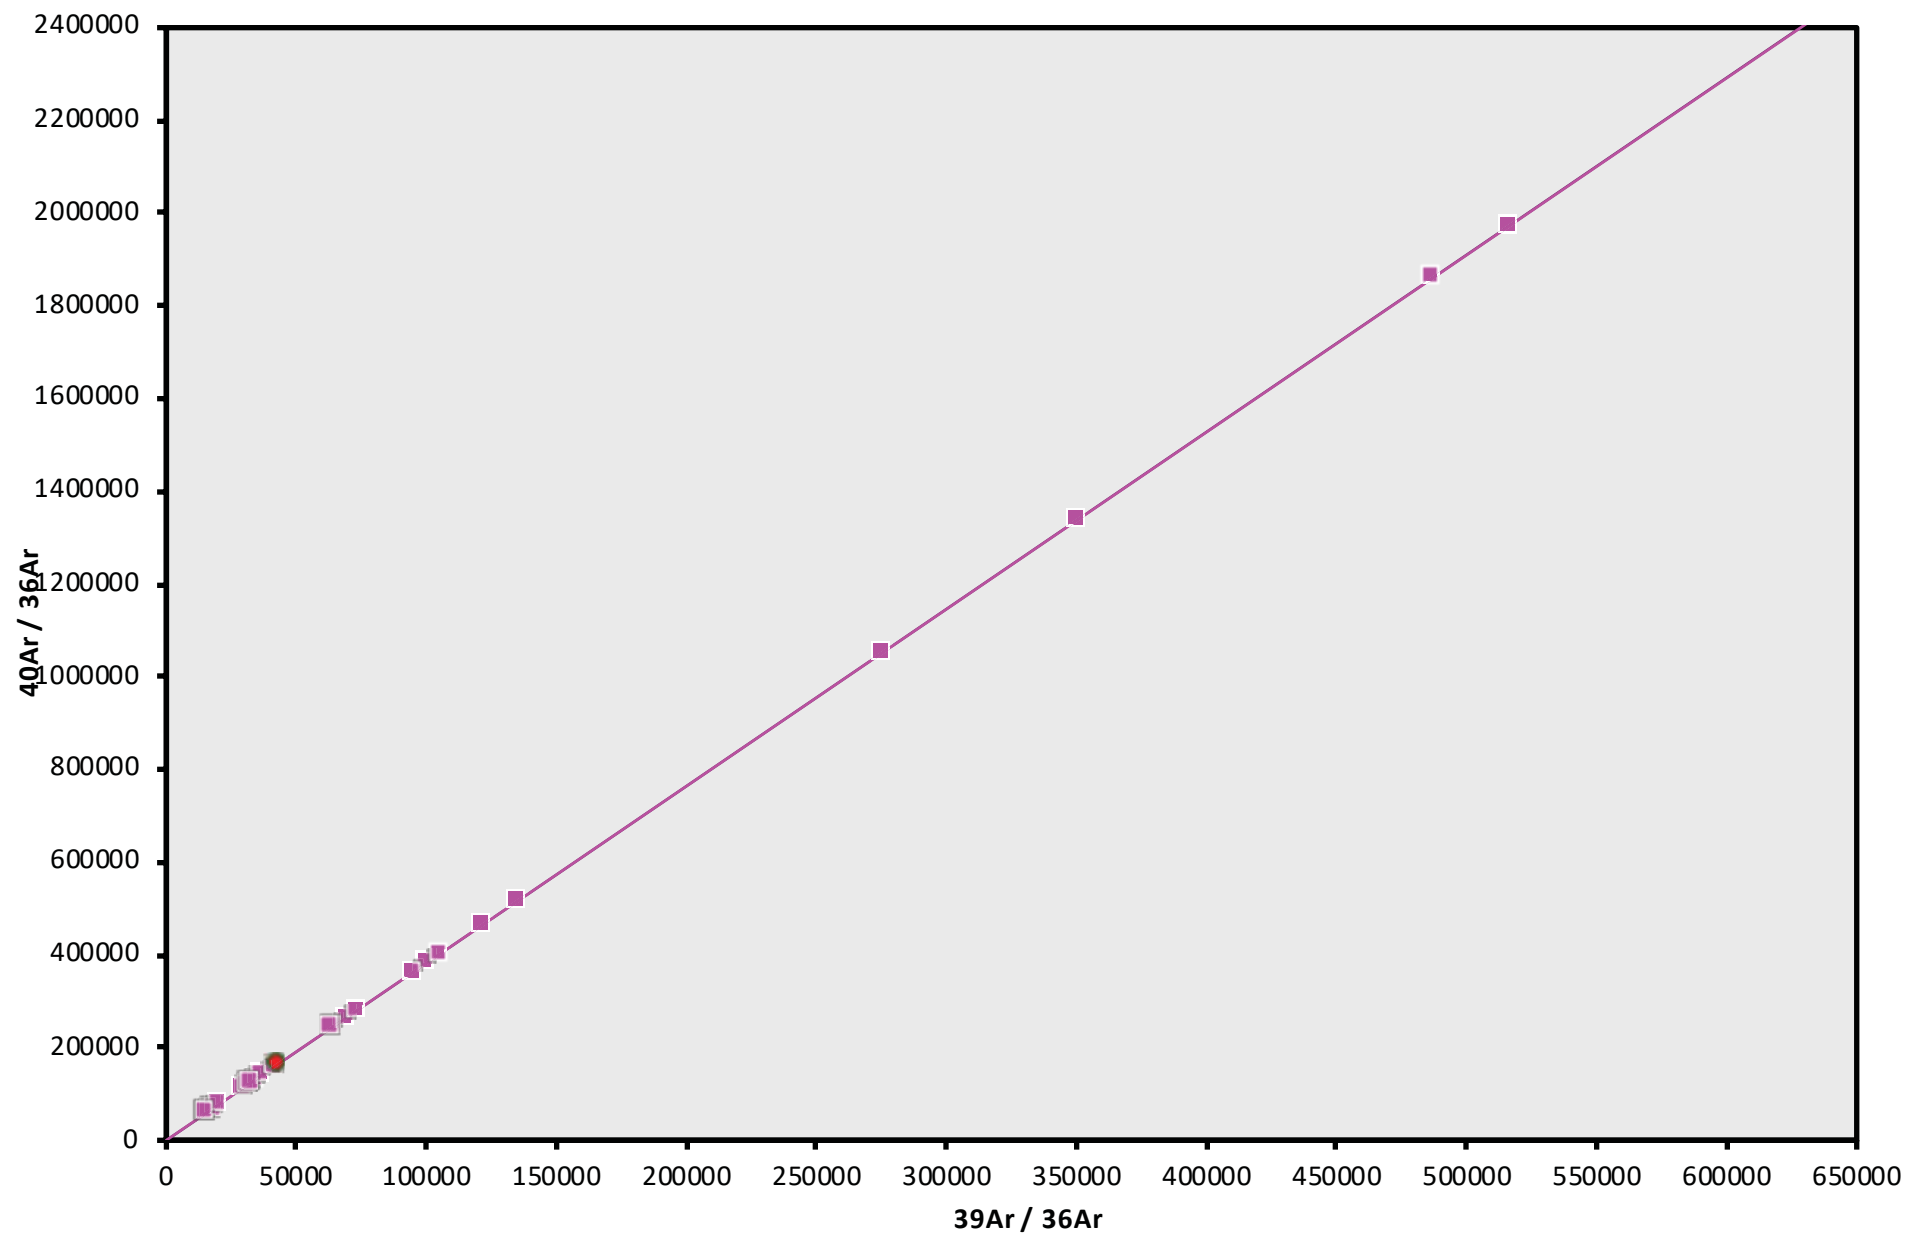

Ar-Ages in Ma

WEIGHTED PLATEAU

$11.41 \pm 0.04$

TOTAL FUSION

$11.41 \pm 0.04$

NORMAL ISOCHRON

$11.40 \pm 0.04$

INVERSE ISOCHRON

$11.41 \pm 0.04$

MSWD (PROBABILITY)

1.69 (1%)

40AR/36AR INTERCEPT

Sample Info

Sanidine

Stockade Mountain

Dan Miggins

IRR = 20-OSU-01 (1C28-

20F11209.AGE >>> VS17-034 >>> OREGON | SWENTON (18-58) PROJECT

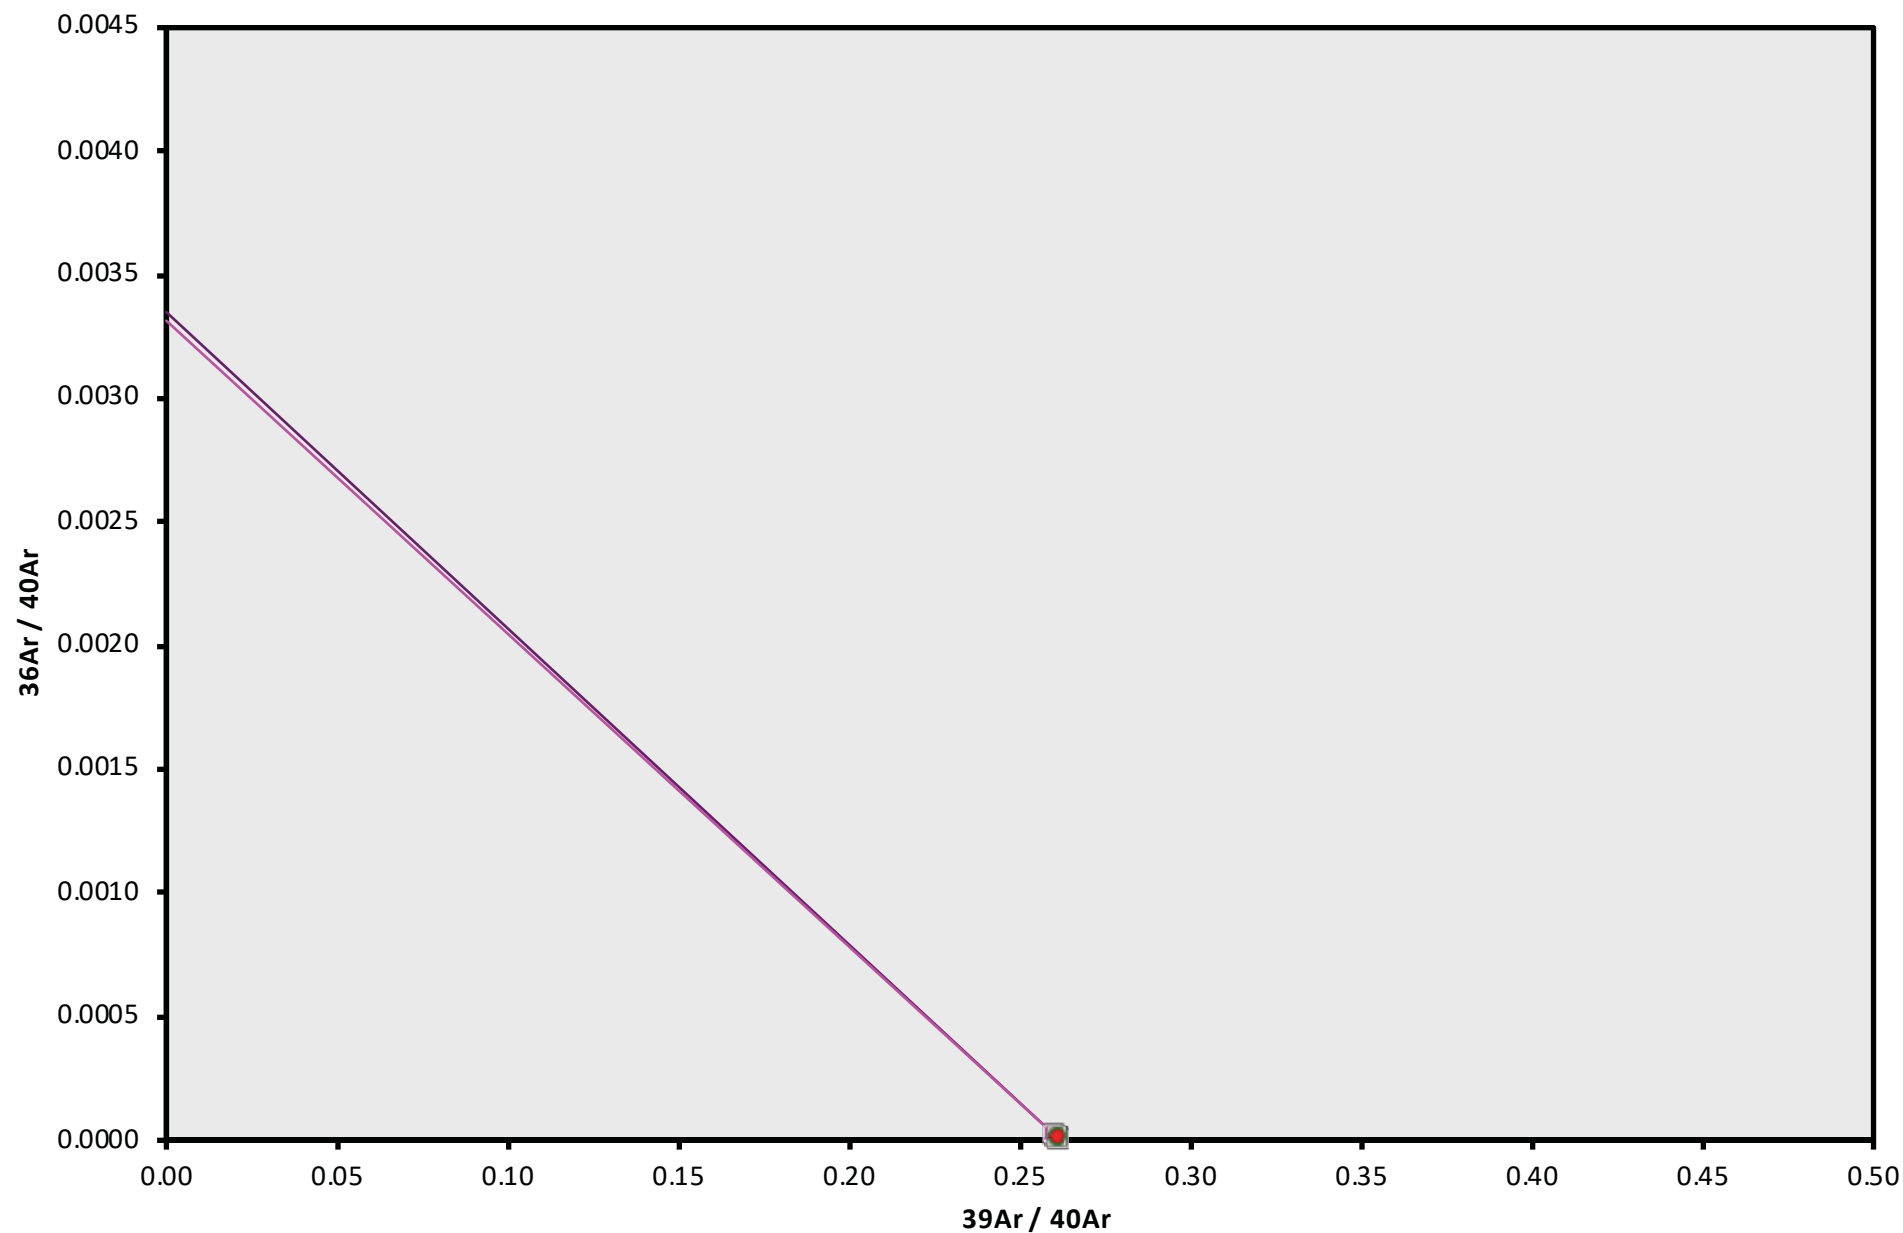

Ar-Ages in Ma

WEIGHTED PLATEAU

$11.41 \pm 0.04$

TOTAL FUSION

$11.41 \pm 0.04$

NORMAL ISOCHRON

$11.40 \pm 0.04$

INVERSE ISOCHRON

$11.41 \pm 0.04$

MSWD (PROBABILITY)

2.10 (0%)

SPREADING FACTOR

Sample Info

Sanidine

Stockade Mountain

Dan Miggins

IRR = 20-OSU-01 (1C28-

| Relative Abundances |        | 36Ar<br>[fA] | %1σ   | 37Ar<br>[fA] | %1σ      | 38Ar<br>[fA] | %1σ    | 39Ar<br>[fA] | %1σ   | 40Ar<br>[fA] | %1σ   | 40(r)/39(k) ± 2σ | Age ± 2σ<br>(Ma) | 40Ar(r)<br>(%) | 39Ar(k)<br>(%) | K/Ca ± 2σ   |
|---------------------|--------|--------------|-------|--------------|----------|--------------|--------|--------------|-------|--------------|-------|------------------|------------------|----------------|----------------|-------------|
| 20F25145            | 0.3 %  | 0.711000     | 0.311 | 0.322839     | 58.541   | 0.135235     | 6.714  | 1.2722       | 0.659 | 214.864      | 0.215 | 4.30643 ±1.46002 | 12.87 ±4.35      | 2.55           | 0.06           | 1.7 ±2.0    |
| 20F25147            | 0.4 %  | 0.403930     | 0.465 | 0.056026     | 338.231  | 0.084992     | 10.801 | 0.4406       | 1.951 | 121.781      | 0.380 | 6.39276 ±3.50295 | 19.08 ±10.40     | 2.31           | 0.02           | 3.4 ±22.9   |
| 20F25148            | 0.5 %  | 0.590793     | 0.353 | 0.017667     | 1063.713 | 0.131267     | 6.845  | 1.6380       | 0.528 | 180.813      | 0.256 | 4.15569 ±1.05423 | 12.42 ±3.14      | 3.76           | 0.08           | 39.9 ±848.2 |
| 20F25150            | 0.6 %  | 0.468416     | 0.410 | 0.044707     | 439.480  | 0.114740     | 7.906  | 1.3427       | 0.620 | 142.867      | 0.324 | 3.65568 ±1.18396 | 10.93 ±3.53      | 3.44           | 0.07           | 12.9 ±113.5 |
| 20F25151            | 0.7 %  | 0.872582     | 0.284 | 0.147713     | 129.561  | 0.230936     | 4.064  | 4.6391       | 0.196 | 271.799      | 0.170 | 3.19180 ±0.44813 | 9.55 ±1.34       | 5.45           | 0.23           | 13.5 ±35.0  |
| 20F25153            | 0.9 %  | 0.526321     | 0.376 | 0.081931     | 241.405  | 0.139353     | 6.144  | 2.8252       | 0.314 | 164.824      | 0.281 | 3.47311 ±0.58252 | 10.39 ±1.74      | 5.95           | 0.14           | 14.8 ±71.6  |
| 20F25154            | 1.1 %  | 0.301597     | 0.594 | 0.071577     | 275.506  | 0.082991     | 10.990 | 1.0828       | 0.785 | 93.060       | 0.497 | 3.90223 ±1.34858 | 11.67 ±4.02      | 4.54           | 0.05           | 6.5 ±35.8   |
| 20F25155            | 1.3 %  | 0.671461     | 0.323 | 0.571481     | 32.843   | 0.224927     | 4.353  | 6.9464       | 0.142 | 221.879      | 0.208 | 3.47769 ±0.26112 | 10.40 ±0.78      | 10.89          | 0.34           | 5.2 ±3.4    |
| 20F25157            | 1.5 %  | 0.846769     | 0.281 | 0.402579     | 48.000   | 0.297411     | 3.066  | 10.6360      | 0.098 | 288.147      | 0.161 | 3.64570 ±0.18999 | 10.90 ±0.57      | 13.46          | 0.52           | 11.4 ±10.9  |
| 20F25158            | 1.8 %  | 0.959817     | 0.264 | 0.614175     | 32.086   | 0.414391     | 2.196  | 18.1395      | 0.068 | 348.534      | 0.133 | 3.63185 ±0.11976 | 10.86 ±0.36      | 18.90          | 0.90           | 12.7 ±8.1   |
| 20F25159            | 2.2 %  | 0.702623     | 0.299 | 0.799904     | 24.000   | 0.430097     | 2.210  | 23.5646      | 0.059 | 291.464      | 0.159 | 3.58895 ±0.07675 | 10.73 ±0.23      | 29.02          | 1.16           | 12.7 ±6.1   |
| 20F25161            | 2.6 %  | 1.033369     | 0.251 | 1.745812     | 10.756   | 0.804406     | 1.076  | 50.4838      | 0.044 | 489.749      | 0.095 | 3.67451 ±0.04473 | 10.99 ±0.13      | 37.88          | 2.49           | 12.4 ±2.7   |
| 20F25162            | 3.1 %  | 0.810234     | 0.291 | 2.183943     | 9.065    | 0.861335     | 1.126  | 58.2552      | 0.044 | 451.132      | 0.103 | 3.65010 ±0.03423 | 10.92 ±0.10      | 47.13          | 2.88           | 11.5 ±2.1   |
| 20F25163            | 3.6 %  | 0.840776     | 0.294 | 3.862846     | 4.733    | 1.410098     | 0.610  | 102.8227     | 0.041 | 623.548      | 0.074 | 3.65843 ±0.02022 | 10.94 ±0.06      | 60.33          | 5.07           | 11.4 ±1.1   |
| 20F25165            | 4.1 %  | 0.402917     | 0.458 | 3.734729     | 5.140    | 1.370053     | 0.659  | 107.6707     | 0.041 | 513.106      | 0.090 | 3.66558 ±0.01448 | 10.96 ±0.04      | 76.92          | 5.31           | 12.4 ±1.3   |
| 20F25166            | 4.7 %  | 0.351275     | 0.519 | 4.180142     | 4.632    | 1.487481     | 0.628  | 118.0713     | 0.040 | 535.932      | 0.086 | 3.66509 ±0.01298 | 10.96 ±0.04      | 80.74          | 5.83           | 12.1 ±1.1   |
| 20F25167            | 5.3 %  | 0.352827     | 0.521 | 5.123318     | 3.719    | 1.926533     | 0.520  | 154.6976     | 0.040 | 667.529      | 0.069 | 3.64542 ±0.01013 | 10.90 ±0.03      | 84.48          | 7.64           | 13.0 ±1.0   |
| 20F25169            | 6.0 %  | 0.350563     | 0.517 | 5.803412     | 3.268    | 2.192351     | 0.430  | 177.1032     | 0.040 | 745.817      | 0.062 | 3.63028 ±0.00888 | 10.86 ±0.03      | 86.20          | 8.74           | 13.1 ±0.9   |
| 20F25170            | 6.8 %  | 0.321872     | 0.558 | 5.187935     | 3.727    | 2.043188     | 0.432  | 164.4758     | 0.040 | 689.538      | 0.067 | 3.61793 ±0.00939 | 10.82 ±0.03      | 86.30          | 8.12           | 13.6 ±1.0   |
| 20F25171            | 7.5 %  | 0.302454     | 0.597 | 4.644937     | 4.060    | 1.933538     | 0.500  | 152.9740     | 0.040 | 643.320      | 0.072 | 3.62498 ±0.01002 | 10.84 ±0.03      | 86.20          | 7.55           | 14.2 ±1.1   |
| 20F25173            | 8.3 %  | 0.305517     | 0.585 | 4.359699     | 4.457    | 1.819515     | 0.508  | 142.9515     | 0.040 | 607.246      | 0.076 | 3.62036 ±0.01062 | 10.83 ±0.03      | 85.22          | 7.06           | 14.1 ±1.3   |
| 20F25174            | 9.1 %  | 0.286444     | 0.615 | 3.525053     | 5.405    | 1.499980     | 0.610  | 117.4472     | 0.041 | 509.234      | 0.091 | 3.61939 ±0.01263 | 10.83 ±0.04      | 83.47          | 5.80           | 14.3 ±1.5   |
| 20F25175            | 10.1 % | 1.405015     | 0.227 | 3.315528     | 5.619    | 1.618532     | 0.581  | 109.5990     | 0.041 | 806.870      | 0.057 | 3.58816 ±0.02575 | 10.73 ±0.08      | 48.74          | 5.41           | 14.2 ±1.6   |
| 20F25177            | 11.2 % | 0.333610     | 0.537 | 2.965577     | 6.652    | 1.276841     | 0.721  | 97.5481      | 0.041 | 452.417      | 0.102 | 3.63251 ±0.01539 | 10.86 ±0.05      | 78.32          | 4.81           | 14.1 ±1.9   |
| 20F25178            | 12.4 % | 0.315076     | 0.562 | 2.261983     | 8.882    | 1.044765     | 0.886  | 79.3220      | 0.043 | 381.512      | 0.121 | 3.64151 ±0.01862 | 10.89 ±0.06      | 75.71          | 3.92           | 15.1 ±2.7   |
| 20F25179            | 13.6 % | 0.330270     | 0.547 | 1.863910     | 10.638   | 0.903408     | 1.005  | 66.4458      | 0.044 | 338.622      | 0.137 | 3.63399 ±0.02446 | 10.87 ±0.07      | 71.31          | 3.28           | 15.3 ±3.3   |
| 20F25181            | 14.9 % | 0.369678     | 0.496 | 1.885019     | 9.834    | 0.802151     | 1.210  | 59.0820      | 0.045 | 322.256      | 0.144 | 3.61353 ±0.02567 | 10.81 ±0.08      | 66.25          | 2.92           | 13.5 ±2.7   |
| 20F25182            | 16.2 % | 0.375479     | 0.495 | 1.568814     | 12.443   | 0.701568     | 1.312  | 49.7489      | 0.045 | 290.382      | 0.159 | 3.61601 ±0.03067 | 10.82 ±0.09      | 61.95          | 2.46           | 13.6 ±3.4   |
| 20F25183            | 17.6 % | 0.366214     | 0.507 | 1.291321     | 14.631   | 0.633224     | 1.500  | 44.2773      | 0.046 | 268.257      | 0.172 | 3.62438 ±0.03432 | 10.84 ±0.10      | 59.82          | 2.19           | 14.7 ±4.3   |
| 20F25185            | 19.0 % | 0.388750     | 0.485 | 1.200754     | 16.786   | 0.557602     | 1.709  | 38.5908      | 0.048 | 255.205      | 0.181 | 3.64809 ±0.03993 | 10.91 ±0.12      | 55.16          | 1.90           | 13.8 ±4.6   |
| 20F25186            | 20.5 % | 0.327837     | 0.541 | 1.096784     | 16.945   | 0.463217     | 1.952  | 31.9984      | 0.051 | 211.960      | 0.218 | 3.60874 ±0.04582 | 10.79 ±0.14      | 54.48          | 1.58           | 12.5 ±4.3   |
| 20F25188            | 22.3 % | 0.321814     | 0.560 | 0.863572     | 22.999   | 0.429258     | 2.250  | 29.9714      | 0.054 | 203.816      | 0.227 | 3.63966 ±0.04928 | 10.89 ±0.15      | 53.52          | 1.48           | 14.9 ±6.9   |
| Σ                   |        | 16.947299    | 0.069 | 65.652535    | 1.659    | 28.065386    | 0.187  | 2026.0637    | 0.010 | 12347.481    | 0.021 |                  |                  |                |                |             |

| Information on Analysis and Constants Used in Calculations |                                                              |
|------------------------------------------------------------|--------------------------------------------------------------|
| Project = <b>SWENTON (18-58)</b>                           | Age Equations = <b>Min et al. (2000)</b>                     |
| Sample = <b>VS17-035</b>                                   | Negative Intensities = <b>Allowed</b>                        |
| Material = <b>Groundmass</b>                               | Collector Calibrations = <b>36Ar</b>                         |
| Location = <b>Mustang Butte</b>                            | Decay 40K = <b>5.463 ±0.107 E-10 1/a</b>                     |
| Region = <b>Eastern Oregon</b>                             | Decay 39Ar = <b>2.940 ±0.016 E-07 1/h</b>                    |
| Analyst = <b>Dan Miggins</b>                               | Decay 37Ar = <b>8.230 ±0.012 E-04 1/h</b>                    |
| Irradiation = <b>20-OSU-01 (1C27-20)</b>                   | Decay 36Cl = <b>2.257 ±0.015 E-06 1/a</b>                    |
| Position = <b>X: 0   Y: 0   Z/H: 37.09883 mm</b>           | Decay 40K(EC,β <sup>+</sup> ) = <b>0.580 ±0.014 E-10 1/a</b> |
| FCT-NM Age = <b>28.201 ±0.023 Ma</b>                       | Decay 40K(β <sup>-</sup> ) = <b>4.884 ±0.099 E-10 1/a</b>    |
| FCT-NM Reference = <b>Kuiper et al (2008)</b>              | Atmospheric 40/36(a) = <b>294.53 ±0.66</b>                   |
| FCT-NM 40Ar/39Ar Ratio = <b>9.47349 ±0.01478</b>           | Atmospheric 38/36(a) = <b>0.1885 ±0.0003</b>                 |
| FCT-NM J-value = <b>0.00163884 ±0.00000256</b>             | Production 39/37(ca) = <b>0.0006425 ±0.0000059</b>           |
| Air Shot 40Ar/36Ar = <b>298.5400 ±0.3403</b>               | Production 38/37(ca) = <b>0.0001800 ±0.0000173</b>           |
| Air Shot MDF = <b>1.00001677 ±0.00038630 (LIN)</b>         | Production 36/37(ca) = <b>0.0002703 ±0.0000005</b>           |
| Experiment Type = <b>Incremental Heating</b>               | Production 40/39(k) = <b>0.000607 ±0.000059</b>              |
| Extraction Method = <b>Single Crystal Laser Heating</b>    | Production 38/39(k) = <b>0.012077 ±0.000011</b>              |
| Heating = <b>62 sec</b>                                    | Production 36/38(cl) = <b>262.80 ±1.71</b>                   |
| Isolation = <b>6.12 min</b>                                | Scaling Ratio K/Ca = <b>0.430</b>                            |
| Instrument = <b>ARGUS-VI-F</b>                             | Abundance Ratio 40K/K = <b>1.1700 ±0.0100 E-04</b>           |
| Preferred Age = <b>Plateau Age</b>                         | Atomic Weight K = <b>39.0983 ±0.0001 g</b>                   |
| Age Classification = <b>Eruption Age</b>                   |                                                              |
| IGSN = <b>Undefined</b>                                    |                                                              |
| Rock Class = <b>Undefined</b>                              |                                                              |
| Lithology = <b>Undefined</b>                               |                                                              |
| Lat-Lon = <b>Undefined - Undefined</b>                     |                                                              |

| Results                                                 | 40(a)/36(a) ± 2σ    | 40(r)/39(k) ± 2σ          | Age ± 2σ<br>(Ma)   | MSWD         | 39Ar(k)<br>(%,n)     | K/Ca ± 2σ |
|---------------------------------------------------------|---------------------|---------------------------|--------------------|--------------|----------------------|-----------|
| Age Plateau                                             |                     | 3.62403 ±0.00485 ±0.13%   | 10.84 ±0.04 ±0.34% | 1.52 10%     | 67.20 15             | 13.8 ±0.4 |
|                                                         |                     | Full External Error ±0.56 |                    | 1.76         | 2σ Confidence Limit  |           |
|                                                         |                     | Analytical Error ±0.01    |                    | 1.2321       | Error Magnification  |           |
| Total Fusion Age                                        |                     | 3.63275 ±0.00485 ±0.13%   | 10.87 ±0.04 ±0.34% |              | 32                   | 13.3 ±0.4 |
|                                                         |                     | Full External Error ±0.57 |                    |              |                      |           |
|                                                         |                     | Analytical Error ±0.01    |                    |              |                      |           |
| Normal Isochron<br>Error Chron                          | 293.01 ±1.94 ±0.66% | 3.62806 ±0.00796 ±0.22%   | 10.85 ±0.04 ±0.38% | 1.80 4%      | 67.20 15             |           |
|                                                         |                     | Full External Error ±0.56 |                    | 1.78         | 2σ Confidence Limit  |           |
|                                                         |                     | Analytical Error ±0.02    |                    | 1.3419       | Error Magnification  |           |
|                                                         |                     |                           |                    | 36           | Number of Iterations |           |
|                                                         |                     |                           |                    | 0.0000362606 | Convergence          |           |
| Inverse Isochron<br>Error Chron                         | 292.92 ±1.95 ±0.66% | 3.62869 ±0.00799 ±0.22%   | 10.85 ±0.04 ±0.38% | 1.81 4%      | 67.20 15             |           |
|                                                         |                     | Full External Error ±0.56 |                    | 1.78         | 2σ Confidence Limit  |           |
|                                                         |                     | Analytical Error ±0.02    |                    | 1.3447       | Error Magnification  |           |
|                                                         |                     |                           |                    | 4            | Number of Iterations |           |
| Notes                                                   |                     |                           |                    | 0.0000844962 | Convergence          |           |
| Subatmospheric Initial 40Ar/36Ar = 294.53 ± 0.23 (%SD). |                     |                           |                    | 37%          | Spreading Factor     |           |

| Incremental Heating |        |   | 36Ar(a)<br>[fA] | 37Ar(ca)<br>[fA] | 38Ar(cl)<br>[fA] | 39Ar(k)<br>[fA] | 40Ar(r)<br>[fA] | Age ± 2σ<br>(Ma) | 40Ar(r)<br>(%) | 39Ar(k)<br>(%) | K/Ca ± 2σ   |
|---------------------|--------|---|-----------------|------------------|------------------|-----------------|-----------------|------------------|----------------|----------------|-------------|
| 20F25145            | 0.3 %  |   | 0.710913        | 0.322839         | 0.0000000        | 1.2720          | 5.4777          | 12.87 ±4.35      | 2.55           | 0.06           | 1.7 ±2.0    |
| 20F25147            | 0.4 %  |   | 0.403914        | 0.056026         | 0.0035239        | 0.4405          | 2.8162          | 19.08 ±10.40     | 2.31           | 0.02           | 3.4 ±22.9   |
| 20F25148            | 0.5 %  |   | 0.590788        | 0.017667         | 0.0001185        | 1.6380          | 6.8071          | 12.42 ±3.14      | 3.76           | 0.08           | 39.9 ±848.2 |
| 20F25150            | 0.6 %  |   | 0.468402        | 0.044707         | 0.0102235        | 1.3426          | 4.9083          | 10.93 ±3.53      | 3.44           | 0.07           | 12.9 ±113.5 |
| 20F25151            | 0.7 %  |   | 0.872539        | 0.147713         | 0.0104103        | 4.6390          | 14.8069         | 9.55 ±1.34       | 5.45           | 0.23           | 13.5 ±35.0  |
| 20F25153            | 0.9 %  |   | 0.526297        | 0.081931         | 0.0060123        | 2.8251          | 9.8119          | 10.39 ±1.74      | 5.95           | 0.14           | 14.8 ±71.6  |
| 20F25154            | 1.1 %  |   | 0.301613        | 0.071577         | 0.0130723        | 1.0829          | 4.2255          | 11.67 ±4.02      | 4.54           | 0.05           | 6.5 ±35.8   |
| 20F25155            | 1.3 %  |   | 0.671303        | 0.571481         | 0.0143960        | 6.9461          | 24.1562         | 10.40 ±0.78      | 10.89          | 0.34           | 5.2 ±3.4    |
| 20F25157            | 1.5 %  |   | 0.846658        | 0.402579         | 0.0092959        | 10.6357         | 38.7746         | 10.90 ±0.57      | 13.46          | 0.52           | 11.4 ±10.9  |
| 20F25158            | 1.8 %  |   | 0.959647        | 0.614175         | 0.0143209        | 18.1391         | 65.8785         | 10.86 ±0.36      | 18.90          | 0.90           | 12.7 ±8.1   |
| 20F25159            | 2.2 %  |   | 0.702404        | 0.799904         | 0.0129663        | 23.5641         | 84.5703         | 10.73 ±0.23      | 29.02          | 1.16           | 12.7 ±6.1   |
| 20F25161            | 2.6 %  |   | 1.032897        | 1.745812         | 0.0000000        | 50.4826         | 185.4992        | 10.99 ±0.13      | 37.88          | 2.49           | 12.4 ±2.7   |
| 20F25162            | 3.1 %  |   | 0.809642        | 2.183943         | 0.0047928        | 58.2538         | 212.6322        | 10.92 ±0.10      | 47.13          | 2.88           | 11.5 ±2.1   |
| 20F25163            | 3.6 %  |   | 0.839729        | 3.862846         | 0.0093544        | 102.8202        | 376.1605        | 10.94 ±0.06      | 60.33          | 5.07           | 11.4 ±1.1   |
| 20F25165            | 4.1 %  |   | 0.401908        | 3.734729         | 0.0000000        | 107.6683        | 394.6670        | 10.96 ±0.04      | 76.92          | 5.31           | 12.4 ±1.3   |
| 20F25166            | 4.7 %  |   | 0.350145        | 4.180142         | 0.0000000        | 118.0686        | 432.7320        | 10.96 ±0.04      | 80.74          | 5.83           | 12.1 ±1.1   |
| 20F25167            | 5.3 %  |   | 0.351443        | 5.123318         | 0.0000000        | 154.6943        | 563.9252        | 10.90 ±0.03      | 84.48          | 7.64           | 13.0 ±1.0   |
| 20F25169            | 6.0 %  | ✓ | 0.348994        | 5.803412         | 0.0000000        | 177.0995        | 642.9205        | 10.86 ±0.03      | 86.20          | 8.74           | 13.1 ±0.9   |
| 20F25170            | 6.8 %  | ✓ | 0.320470        | 5.187935         | 0.0000000        | 164.4724        | 595.0504        | 10.82 ±0.03      | 86.30          | 8.12           | 13.6 ±1.0   |
| 20F25171            | 7.5 %  | ✓ | 0.301191        | 4.644937         | 0.0284966        | 152.9710        | 554.5175        | 10.84 ±0.03      | 86.20          | 7.55           | 14.2 ±1.1   |
| 20F25173            | 8.3 %  | ✓ | 0.304329        | 4.359699         | 0.0349731        | 142.9487        | 517.5255        | 10.83 ±0.03      | 85.22          | 7.06           | 14.1 ±1.3   |
| 20F25174            | 9.1 %  | ✓ | 0.285484        | 3.525053         | 0.0271491        | 117.4449        | 425.0788        | 10.83 ±0.04      | 83.47          | 5.80           | 14.3 ±1.5   |
| 20F25175            | 10.1 % | ✓ | 1.404111        | 3.315528         | 0.0296594        | 109.5968        | 393.2507        | 10.73 ±0.08      | 48.74          | 5.41           | 14.2 ±1.6   |
| 20F25177            | 11.2 % | ✓ | 0.332799        | 2.965577         | 0.0355086        | 97.5462         | 354.3381        | 10.86 ±0.05      | 78.32          | 4.81           | 14.1 ±1.9   |
| 20F25178            | 12.4 % | ✓ | 0.314457        | 2.261983         | 0.0271284        | 79.3206         | 288.8463        | 10.89 ±0.06      | 75.71          | 3.92           | 15.1 ±2.7   |
| 20F25179            | 13.6 % | ✓ | 0.329756        | 1.863910         | 0.0384616        | 66.4446         | 241.4588        | 10.87 ±0.07      | 71.31          | 3.28           | 15.3 ±3.3   |
| 20F25181            | 14.9 % | ✓ | 0.369164        | 1.885019         | 0.0187053        | 59.0808         | 213.4905        | 10.81 ±0.08      | 66.25          | 2.92           | 13.5 ±2.7   |
| 20F25182            | 16.2 % | ✓ | 0.375047        | 1.568814         | 0.0297833        | 49.7479         | 179.8890        | 10.82 ±0.09      | 61.95          | 2.46           | 13.6 ±3.4   |
| 20F25183            | 17.6 % | ✓ | 0.365857        | 1.291321         | 0.0293010        | 44.2765         | 160.4745        | 10.84 ±0.10      | 59.82          | 2.19           | 14.7 ±4.3   |
| 20F25185            | 19.0 % | ✓ | 0.388420        | 1.200754         | 0.0181166        | 38.5900         | 140.7800        | 10.91 ±0.12      | 55.16          | 1.90           | 13.8 ±4.6   |
| 20F25186            | 20.5 % | ✓ | 0.327537        | 1.096784         | 0.0148435        | 31.9977         | 115.4714        | 10.79 ±0.14      | 54.48          | 1.58           | 12.5 ±4.3   |
| 20F25188            | 22.3 % | ✓ | 0.321579        | 0.863572         | 0.0065275        | 29.9708         | 109.0835        | 10.89 ±0.15      | 53.52          | 1.48           | 14.9 ±6.9   |

Σ 16.929437 65.652535 0.4471411 2026.0216 7360.0245

| Information on Analysis                                                                                                                                                                                                                                   | Results          | 40(r)/39(k) ± 2σ        | Age ± 2σ<br>(Ma)                                                          | MSWD                          | 39Ar(k)<br>(%,n)                                          | K/Ca ± 2σ |
|-----------------------------------------------------------------------------------------------------------------------------------------------------------------------------------------------------------------------------------------------------------|------------------|-------------------------|---------------------------------------------------------------------------|-------------------------------|-----------------------------------------------------------|-----------|
| Project = SWENTON (18-58)<br>Sample = VS17-035<br>Material = Groundmass<br>Location = Mustang Butte<br>Region = Eastern Oregon<br>Analyst = Dan Miggins<br>Irradiation = 20-OSU-01 (1C27-20)<br>J = 0.00163884 ± 0.00000256<br>FCT-NM = 28.201 ± 0.023 Ma | Age Plateau      | 3.62403 ±0.00485 ±0.13% | 10.84 ±0.04 ±0.34%<br>Full External Error ±0.56<br>Analytical Error ±0.01 | 1.52<br>10%<br>1.76<br>1.2321 | 67.20<br>15<br>2σ Confidence Limit<br>Error Magnification | 13.8 ±0.4 |
|                                                                                                                                                                                                                                                           | Total Fusion Age | 3.63275 ±0.00485 ±0.13% | 10.87 ±0.04 ±0.34%<br>Full External Error ±0.57<br>Analytical Error ±0.01 |                               | 32                                                        | 13.3 ±0.4 |

| Normal Isochron |        | 39(k)/36(a) ± 2σ |              | 40(a+r)/36(a) ± 2σ | r.i.   |
|-----------------|--------|------------------|--------------|--------------------|--------|
| 20F25145        | 0.3 %  |                  | 1.79 ±0.03   | 302.24 ±2.29       | 0.3512 |
| 20F25147        | 0.4 %  |                  | 1.09 ±0.04   | 301.50 ±3.62       | 0.1799 |
| 20F25148        | 0.5 %  |                  | 2.77 ±0.04   | 306.05 ±2.67       | 0.4496 |
| 20F25150        | 0.6 %  |                  | 2.87 ±0.04   | 305.01 ±3.19       | 0.4332 |
| 20F25151        | 0.7 %  |                  | 5.32 ±0.04   | 311.50 ±2.06       | 0.7057 |
| 20F25153        | 0.9 %  |                  | 5.37 ±0.05   | 313.17 ±2.94       | 0.6156 |
| 20F25154        | 1.1 %  |                  | 3.59 ±0.07   | 308.54 ±4.78       | 0.4625 |
| 20F25155        | 1.3 %  |                  | 10.35 ±0.07  | 330.51 ±2.54       | 0.7694 |
| 20F25157        | 1.5 %  |                  | 12.56 ±0.07  | 340.33 ±2.20       | 0.8192 |
| 20F25158        | 1.8 %  |                  | 18.90 ±0.10  | 363.18 ±2.15       | 0.8652 |
| 20F25159        | 2.2 %  |                  | 33.55 ±0.20  | 414.93 ±2.81       | 0.8672 |
| 20F25161        | 2.6 %  |                  | 48.87 ±0.25  | 474.12 ±2.55       | 0.9217 |
| 20F25162        | 3.1 %  |                  | 71.95 ±0.42  | 557.15 ±3.44       | 0.9326 |
| 20F25163        | 3.6 %  |                  | 122.44 ±0.73 | 742.48 ±4.52       | 0.9605 |
| 20F25165        | 4.1 %  |                  | 267.89 ±2.47 | 1276.51 ±11.96     | 0.9773 |
| 20F25166        | 4.7 %  |                  | 337.20 ±3.52 | 1530.39 ±16.16     | 0.9835 |
| 20F25167        | 5.3 %  |                  | 440.17 ±4.62 | 1899.13 ±20.05     | 0.9884 |
| 20F25169        | 6.0 %  | ✓                | 507.46 ±5.29 | 2136.74 ±22.35     | 0.9900 |
| 20F25170        | 6.8 %  | ✓                | 513.22 ±5.77 | 2151.34 ±24.29     | 0.9904 |
| 20F25171        | 7.5 %  | ✓                | 507.89 ±6.11 | 2135.61 ±25.82     | 0.9907 |
| 20F25173        | 8.3 %  | ✓                | 469.72 ±5.54 | 1995.07 ±23.66     | 0.9894 |
| 20F25174        | 9.1 %  | ✓                | 411.39 ±5.09 | 1783.51 ±22.26     | 0.9872 |
| 20F25175        | 10.1 % | ✓                | 78.05 ±0.36  | 574.60 ±2.69       | 0.9539 |
| 20F25177        | 11.2 % | ✓                | 293.11 ±3.17 | 1359.25 ±14.91     | 0.9796 |
| 20F25178        | 12.4 % | ✓                | 252.25 ±2.85 | 1213.08 ±13.99     | 0.9748 |
| 20F25179        | 13.6 % | ✓                | 201.50 ±2.22 | 1026.76 ±11.61     | 0.9672 |
| 20F25181        | 14.9 % | ✓                | 160.04 ±1.60 | 872.84 ±9.03       | 0.9568 |
| 20F25182        | 16.2 % | ✓                | 132.64 ±1.32 | 774.17 ±8.06       | 0.9480 |
| 20F25183        | 17.6 % | ✓                | 121.02 ±1.23 | 733.16 ±7.86       | 0.9430 |
| 20F25185        | 19.0 % | ✓                | 99.35 ±0.97  | 656.97 ±6.81       | 0.9322 |
| 20F25186        | 20.5 % | ✓                | 97.69 ±1.06  | 647.08 ±7.56       | 0.9233 |
| 20F25188        | 22.3 % | ✓                | 93.20 ±1.05  | 633.74 ±7.67       | 0.9226 |

| Results         | 40(a)/36(a) ± 2σ      |        | 40(r)/39(k) ± 2σ     | Age ± 2σ (Ma)             | MSWD |
|-----------------|-----------------------|--------|----------------------|---------------------------|------|
| Normal Isochron | 293.01                | ±1.94  | 3.62806              | ±0.00796                  | 1.80 |
| Error Chron     |                       | ±0.66% |                      | ±0.22%                    | 4%   |
|                 |                       |        |                      | Full External Error ±0.56 |      |
|                 |                       |        |                      | Analytical Error ±0.02    |      |
|                 |                       |        |                      |                           |      |
| Statistics      | 2σ Confidence Limit   | 1.78   | Convergence          | 0.000036260561            |      |
|                 | Error Magnification   | 1.3419 | Number of Iterations | 36                        |      |
|                 | Number of Data Points | 15     | Calculated Line      | Weighted York-2           |      |



| Inverse Isochron |          | 39(k)/40(a+r) ± 2σ |             | 36(a)/40(a+r) ± 2σ |              | r.i.   |
|------------------|----------|--------------------|-------------|--------------------|--------------|--------|
| 20F25145         | 0.3 %    | 0.0059199          | ± 0.0000821 | 0.00330868         | ± 0.00002505 | 0.1766 |
| 20F25147         | 0.4 %    | 0.0036174          | ± 0.0001438 | 0.00331672         | ± 0.00003985 | 0.1207 |
| 20F25148         | 0.5 %    | 0.0090592          | ± 0.0001063 | 0.00326742         | ± 0.00002848 | 0.2560 |
| 20F25150         | 0.6 %    | 0.0093979          | ± 0.0001315 | 0.00327859         | ± 0.00003427 | 0.2864 |
| 20F25151         | 0.7 %    | 0.0170681          | ± 0.0000885 | 0.00321027         | ± 0.00002124 | 0.3377 |
| 20F25153         | 0.9 %    | 0.0171403          | ± 0.0001444 | 0.00319312         | ± 0.00002999 | 0.3980 |
| 20F25154         | 1.1 %    | 0.0116361          | ± 0.0002163 | 0.00324107         | ± 0.00005019 | 0.3431 |
| 20F25155         | 1.3 %    | 0.0313062          | ± 0.0001581 | 0.00302559         | ± 0.00002329 | 0.4470 |
| 20F25157         | 1.5 %    | 0.0369116          | ± 0.0001391 | 0.00293835         | ± 0.00001901 | 0.4234 |
| 20F25158         | 1.8 %    | 0.0520456          | ± 0.0001555 | 0.00275347         | ± 0.00001630 | 0.3988 |
| 20F25159         | 2.2 %    | 0.0808514          | ± 0.0002737 | 0.00241004         | ± 0.00001635 | 0.4395 |
| 20F25161         | 2.6 %    | 0.1030850          | ± 0.0002154 | 0.00210917         | ± 0.00001133 | 0.3187 |
| 20F25162         | 3.1 %    | 0.1291384          | ± 0.0002885 | 0.00179483         | ± 0.00001109 | 0.3054 |
| 20F25163         | 3.6 %    | 0.1649118          | ± 0.0002799 | 0.00134683         | ± 0.00000819 | 0.2140 |
| 20F25165         | 4.1 %    | 0.2098630          | ± 0.0004163 | 0.00078338         | ± 0.00000734 | 0.1754 |
| 20F25166         | 4.7 %    | 0.2203347          | ± 0.0004206 | 0.00065343         | ± 0.00000690 | 0.1483 |
| 20F25167         | 5.3 %    | 0.2317742          | ± 0.0003714 | 0.00052656         | ± 0.00000556 | 0.1140 |
| 20F25169         | 6.0 % ✓  | 0.2374912          | ± 0.0003506 | 0.00046800         | ± 0.00000490 | 0.1002 |
| 20F25170         | 6.8 % ✓  | 0.2385600          | ± 0.0003730 | 0.00046483         | ± 0.00000525 | 0.1025 |
| 20F25171         | 7.5 % ✓  | 0.2378180          | ± 0.0003921 | 0.00046825         | ± 0.00000566 | 0.1042 |
| 20F25173         | 8.3 % ✓  | 0.2354384          | ± 0.0004056 | 0.00050123         | ± 0.00000594 | 0.1140 |
| 20F25174         | 9.1 % ✓  | 0.2306630          | ± 0.0004601 | 0.00056069         | ± 0.00000700 | 0.1329 |
| 20F25175         | 10.1 % ✓ | 0.1358408          | ± 0.0001923 | 0.00174034         | ± 0.00000816 | 0.1990 |
| 20F25177         | 11.2 % ✓ | 0.2156397          | ± 0.0004756 | 0.00073570         | ± 0.00000807 | 0.1732 |
| 20F25178         | 12.4 % ✓ | 0.2079376          | ± 0.0005347 | 0.00082434         | ± 0.00000950 | 0.1986 |
| 20F25179         | 13.6 % ✓ | 0.1962439          | ± 0.0005633 | 0.00097393         | ± 0.00001101 | 0.2305 |
| 20F25181         | 14.9 % ✓ | 0.1833553          | ± 0.0005517 | 0.00114569         | ± 0.00001185 | 0.2652 |
| 20F25182         | 16.2 % ✓ | 0.1713368          | ± 0.0005679 | 0.00129170         | ± 0.00001344 | 0.2945 |
| 20F25183         | 17.6 % ✓ | 0.1650688          | ± 0.0005893 | 0.00136397         | ± 0.00001462 | 0.3108 |
| 20F25185         | 19.0 % ✓ | 0.1512259          | ± 0.0005675 | 0.00152213         | ± 0.00001578 | 0.3378 |
| 20F25186         | 20.5 % ✓ | 0.1509746          | ± 0.0006771 | 0.00154542         | ± 0.00001804 | 0.3640 |
| 20F25188         | 22.3 % ✓ | 0.1470613          | ± 0.0006865 | 0.00157793         | ± 0.00001910 | 0.3649 |

| Results          | 40(a)/36(a) ± 2σ      |         | 40(r)/39(k) ± 2σ     |           | Age ± 2σ (Ma)              | MSWD |
|------------------|-----------------------|---------|----------------------|-----------|----------------------------|------|
| Inverse Isochron | 292.92                | ± 1.95  | 3.62869              | ± 0.00799 | 10.85 ± 0.04               | 1.81 |
| Error Chron      |                       | ± 0.66% |                      | ± 0.22%   | ± 0.38%                    | 4%   |
|                  |                       |         |                      |           | Full External Error ± 0.56 |      |
|                  |                       |         |                      |           | Analytical Error ± 0.02    |      |
| .....            |                       |         |                      |           |                            |      |
| Statistics       | 2σ Confidence Limit   | 1.78    | Convergence          |           | 0.0000844962               |      |
|                  | Error Magnification   | 1.3447  | Number of Iterations |           | 4                          |      |
|                  | Number of Data Points | 15      | Calculated Line      |           | Weighted York-2            |      |
|                  | Spreading Factor      | 37.3%   |                      |           |                            |      |

| Degassing Patterns |        | 36Ar(a)<br>[fA] | %1σ  | 36Ar(c)<br>[fA] | %1σ  | 36Ar(ca)<br>[fA] | %1σ    | 36Ar(cl)<br>[fA] | %1σ    | 37Ar(ca)<br>[fA] | %1σ    | 38Ar(a)<br>[fA] | %1σ  | 38Ar(c)<br>[fA] | %1σ  | 38Ar(k)<br>[fA] | %1σ  | 38Ar(ca)<br>[fA] | %1σ    | 38Ar(cl)<br>[fA] | %1σ    | 39Ar(k)<br>[fA] | %1σ  | 39Ar(ca)<br>[fA] | %1σ    |
|--------------------|--------|-----------------|------|-----------------|------|------------------|--------|------------------|--------|------------------|--------|-----------------|------|-----------------|------|-----------------|------|------------------|--------|------------------|--------|-----------------|------|------------------|--------|
| 20F25145           | 0.3 %  | 0.710913        | 0.31 | 0.0000000       | 0.00 | 0.0000873        | 58.54  | 0.0000000        | 0.00   | 0.322839         | 58.54  | 0.1340071       | 0.35 | 0.0000000       | 0.00 | 0.015362        | 0.67 | 0.0000581        | 59.33  | 0.0000000        | 0.00   | 1.2720          | 0.66 | 0.0002074        | 58.55  |
| 20F25147           | 0.4 %  | 0.403914        | 0.47 | 0.0000000       | 0.00 | 0.0000151        | 338.23 | 0.0000009        | 260.76 | 0.056026         | 338.23 | 0.0761378       | 0.49 | 0.0000000       | 0.00 | 0.005320        | 1.95 | 0.0000101        | 338.37 | 0.0035239        | 260.76 | 0.4405          | 1.95 | 0.0000360        | 338.23 |
| 20F25148           | 0.5 %  | 0.590788        | 0.35 | 0.0000000       | 0.00 | 0.0000048        | #####  | 0.0000000        | #####  | 0.017667         | #####  | 0.1113635       | 0.39 | 0.0000000       | 0.00 | 0.019782        | 0.54 | 0.0000032        | #####  | 0.0001185        | #####  | 1.6380          | 0.53 | 0.0000114        | #####  |
| 20F25150           | 0.6 %  | 0.468402        | 0.41 | 0.0000000       | 0.00 | 0.0000121        | 439.48 | 0.0000026        | 88.83  | 0.044707         | 439.48 | 0.0882937       | 0.44 | 0.0000000       | 0.00 | 0.016215        | 0.63 | 0.0000080        | 439.59 | 0.0102235        | 88.84  | 1.3426          | 0.62 | 0.0000287        | 439.48 |
| 20F25151           | 0.7 %  | 0.872539        | 0.28 | 0.0000000       | 0.00 | 0.0000399        | 129.56 | 0.0000027        | 90.35  | 0.147713         | 129.56 | 0.1644736       | 0.33 | 0.0000000       | 0.00 | 0.056026        | 0.22 | 0.0000266        | 129.92 | 0.0104103        | 90.35  | 4.6390          | 0.20 | 0.0000949        | 129.56 |
| 20F25153           | 0.9 %  | 0.526297        | 0.38 | 0.0000000       | 0.00 | 0.0000221        | 241.41 | 0.0000016        | 142.61 | 0.081931         | 241.41 | 0.0992070       | 0.41 | 0.0000000       | 0.00 | 0.034119        | 0.33 | 0.0000147        | 241.60 | 0.0060123        | 142.61 | 2.8251          | 0.31 | 0.0000526        | 241.41 |
| 20F25154           | 1.1 %  | 0.301613        | 0.59 | 0.0000000       | 0.00 | 0.0000193        | 275.51 | 0.0000034        | 69.84  | 0.071577         | 275.51 | 0.0568541       | 0.61 | 0.0000000       | 0.00 | 0.013078        | 0.79 | 0.0000129        | 275.67 | 0.0130723        | 69.85  | 1.0829          | 0.79 | 0.0000460        | 275.51 |
| 20F25155           | 1.3 %  | 0.671303        | 0.32 | 0.0000000       | 0.00 | 0.0001545        | 32.84  | 0.0000037        | 68.15  | 0.571481         | 32.84  | 0.1265405       | 0.36 | 0.0000000       | 0.00 | 0.083888        | 0.17 | 0.0001029        | 34.23  | 0.0143960        | 68.15  | 6.9461          | 0.14 | 0.0003672        | 32.86  |
| 20F25157           | 1.5 %  | 0.846658        | 0.28 | 0.0000000       | 0.00 | 0.0001088        | 48.00  | 0.0000024        | 98.39  | 0.402579         | 48.00  | 0.1595950       | 0.32 | 0.0000000       | 0.00 | 0.128448        | 0.13 | 0.0000725        | 48.96  | 0.0092959        | 98.40  | 10.6357         | 0.10 | 0.0002587        | 48.01  |
| 20F25158           | 1.8 %  | 0.959647        | 0.26 | 0.0000000       | 0.00 | 0.0001660        | 32.09  | 0.0000037        | 63.89  | 0.614175         | 32.09  | 0.1808934       | 0.31 | 0.0000000       | 0.00 | 0.219066        | 0.11 | 0.0001106        | 33.50  | 0.0143209        | 63.90  | 18.1391         | 0.07 | 0.0003946        | 32.10  |
| 20F25159           | 2.2 %  | 0.702404        | 0.30 | 0.0000000       | 0.00 | 0.0002162        | 24.00  | 0.0000034        | 73.70  | 0.799904         | 24.00  | 0.1324031       | 0.34 | 0.0000000       | 0.00 | 0.284584        | 0.11 | 0.0001440        | 25.86  | 0.0129663        | 73.71  | 23.5641         | 0.06 | 0.0005139        | 24.02  |
| 20F25161           | 2.6 %  | 1.032897        | 0.25 | 0.0000000       | 0.00 | 0.0004719        | 10.76  | 0.0000000        | 0.00   | 1.745812         | 10.76  | 0.1947012       | 0.30 | 0.0000000       | 0.00 | 0.609679        | 0.10 | 0.0003142        | 14.44  | 0.0000000        | 0.00   | 50.4826         | 0.04 | 0.0011217        | 10.80  |
| 20F25162           | 3.1 %  | 0.809642        | 0.29 | 0.0000000       | 0.00 | 0.0005903        | 9.07   | 0.0000012        | 206.39 | 2.183943         | 9.06   | 0.1526176       | 0.33 | 0.0000000       | 0.00 | 0.703532        | 0.10 | 0.0003931        | 13.23  | 0.0047928        | 206.39 | 58.2538         | 0.04 | 0.0014032        | 9.11   |
| 20F25163           | 3.6 %  | 0.839729        | 0.29 | 0.0000000       | 0.00 | 0.0010441        | 4.74   | 0.0000024        | 98.32  | 3.862846         | 4.73   | 0.1582890       | 0.34 | 0.0000000       | 0.00 | 1.241760        | 0.10 | 0.0006953        | 10.73  | 0.0093544        | 98.32  | 102.8202        | 0.04 | 0.0024819        | 4.82   |
| 20F25165           | 4.1 %  | 0.401908        | 0.46 | 0.0000000       | 0.00 | 0.0010095        | 5.14   | 0.0000000        | 0.00   | 3.734729         | 5.14   | 0.0757596       | 0.49 | 0.0000000       | 0.00 | 1.300310        | 0.10 | 0.0006723        | 10.92  | 0.0000000        | 0.00   | 107.6683        | 0.04 | 0.0023996        | 5.22   |
| 20F25166           | 4.7 %  | 0.350145        | 0.52 | 0.0000000       | 0.00 | 0.0011299        | 4.64   | 0.0000000        | 0.00   | 4.180142         | 4.63   | 0.0660024       | 0.54 | 0.0000000       | 0.00 | 1.425915        | 0.10 | 0.0007524        | 10.69  | 0.0000000        | 0.00   | 118.0686        | 0.04 | 0.0026857        | 4.72   |
| 20F25167           | 5.3 %  | 0.351443        | 0.52 | 0.0000000       | 0.00 | 0.0013848        | 3.72   | 0.0000000        | 0.00   | 5.123318         | 3.72   | 0.0662469       | 0.55 | 0.0000000       | 0.00 | 1.868243        | 0.10 | 0.0009222        | 10.32  | 0.0000000        | 0.00   | 154.6943        | 0.04 | 0.0032917        | 3.83   |
| 20F25169           | 6.0 %  | ✓ 0.348994      | 0.52 | 0.0000000       | 0.00 | 0.0015687        | 3.27   | 0.0000000        | 0.00   | 5.803412         | 3.27   | 0.0657853       | 0.54 | 0.0000000       | 0.00 | 2.138830        | 0.10 | 0.0010446        | 10.17  | 0.0000000        | 0.00   | 177.0995        | 0.04 | 0.0037287        | 3.39   |
| 20F25170           | 6.8 %  | ✓ 0.320470      | 0.56 | 0.0000000       | 0.00 | 0.0014023        | 3.73   | 0.0000000        | 0.00   | 5.187935         | 3.73   | 0.0604086       | 0.58 | 0.0000000       | 0.00 | 1.986334        | 0.10 | 0.0009338        | 10.33  | 0.0000000        | 0.00   | 164.4724        | 0.04 | 0.0033332        | 3.84   |
| 20F25171           | 7.5 %  | ✓ 0.301191      | 0.60 | 0.0000000       | 0.00 | 0.0012555        | 4.06   | 0.0000074        | 37.67  | 4.644937         | 4.06   | 0.0567745       | 0.62 | 0.0000000       | 0.00 | 1.847431        | 0.10 | 0.0008361        | 10.45  | 0.0284966        | 37.68  | 152.9710        | 0.04 | 0.0029844        | 4.16   |
| 20F25173           | 8.3 %  | ✓ 0.304329      | 0.59 | 0.0000000       | 0.00 | 0.0011784        | 4.46   | 0.0000091        | 29.24  | 4.359699         | 4.46   | 0.0573661       | 0.61 | 0.0000000       | 0.00 | 1.726391        | 0.10 | 0.0007847        | 10.61  | 0.0349731        | 29.26  | 142.9487        | 0.04 | 0.0028011        | 4.55   |
| 20F25174           | 9.1 %  | ✓ 0.285484      | 0.62 | 0.0000000       | 0.00 | 0.0009528        | 5.41   | 0.0000070        | 36.19  | 3.525053         | 5.41   | 0.0538137       | 0.64 | 0.0000000       | 0.00 | 1.418382        | 0.10 | 0.0006345        | 11.04  | 0.0271491        | 36.20  | 117.4449        | 0.04 | 0.0022648        | 5.48   |
| 20F25175           | 10.1 % | ✓ 1.404111      | 0.23 | 0.0000000       | 0.00 | 0.0008962        | 5.62   | 0.0000077        | 34.00  | 3.315528         | 5.62   | 0.2646750       | 0.28 | 0.0000000       | 0.00 | 1.323601        | 0.10 | 0.0005968        | 11.15  | 0.0296594        | 34.01  | 109.5968        | 0.04 | 0.0021302        | 5.69   |
| 20F25177           | 11.2 % | ✓ 0.332799      | 0.54 | 0.0000000       | 0.00 | 0.0008016        | 6.65   | 0.0000092        | 27.30  | 2.965577         | 6.65   | 0.0627327       | 0.56 | 0.0000000       | 0.00 | 1.178066        | 0.10 | 0.0005338        | 11.70  | 0.0355086        | 27.32  | 97.5462         | 0.04 | 0.0019054        | 6.72   |
| 20F25178           | 12.4 % | ✓ 0.314457      | 0.56 | 0.0000000       | 0.00 | 0.0006114        | 8.88   | 0.0000070        | 35.33  | 2.261983         | 8.88   | 0.0592752       | 0.59 | 0.0000000       | 0.00 | 0.957954        | 0.10 | 0.0004072        | 13.10  | 0.0271284        | 35.34  | 79.3206         | 0.04 | 0.0014533        | 8.93   |
| 20F25179           | 13.6 % | ✓ 0.329756      | 0.55 | 0.0000000       | 0.00 | 0.0005038        | 10.64  | 0.0000100        | 24.27  | 1.863910         | 10.64  | 0.0621590       | 0.57 | 0.0000000       | 0.00 | 0.802452        | 0.10 | 0.0003355        | 14.35  | 0.0384616        | 24.28  | 66.4446         | 0.04 | 0.0011976        | 10.68  |
| 20F25181           | 14.9 % | ✓ 0.369164      | 0.50 | 0.0000000       | 0.00 | 0.0005095        | 9.84   | 0.0000049        | 52.86  | 1.885019         | 9.83   | 0.0695874       | 0.52 | 0.0000000       | 0.00 | 0.713519        | 0.10 | 0.0003393        | 13.76  | 0.0187053        | 52.87  | 59.0808         | 0.04 | 0.0012111        | 9.88   |
| 20F25182           | 16.2 % | ✓ 0.375047      | 0.50 | 0.0000000       | 0.00 | 0.0004241        | 12.44  | 0.0000077        | 31.41  | 1.568814         | 12.44  | 0.0706964       | 0.52 | 0.0000000       | 0.00 | 0.600806        | 0.10 | 0.0002824        | 15.73  | 0.0297833        | 31.42  | 49.7479         | 0.05 | 0.0010080        | 12.48  |
| 20F25183           | 17.6 % | ✓ 0.365857      | 0.51 | 0.0000000       | 0.00 | 0.0003490        | 14.63  | 0.0000076        | 32.81  | 1.291321         | 14.63  | 0.0689640       | 0.53 | 0.0000000       | 0.00 | 0.534727        | 0.10 | 0.0002324        | 17.52  | 0.0293010        | 32.82  | 44.2765         | 0.05 | 0.0008297        | 14.66  |
| 20F25185           | 19.0 % | ✓ 0.388420      | 0.49 | 0.0000000       | 0.00 | 0.0003246        | 16.79  | 0.0000047        | 53.09  | 1.200754         | 16.79  | 0.0732172       | 0.51 | 0.0000000       | 0.00 | 0.466052        | 0.10 | 0.0002161        | 19.35  | 0.0181166        | 53.10  | 38.5900         | 0.05 | 0.0007715        | 16.81  |
| 20F25186           | 20.5 % | ✓ 0.327537      | 0.54 | 0.0000000       | 0.00 | 0.0002965        | 16.95  | 0.0000039        | 61.37  | 1.096784         | 16.94  | 0.0617407       | 0.56 | 0.0000000       | 0.00 | 0.386436        | 0.10 | 0.0001974        | 19.49  | 0.0148435        | 61.38  | 31.9977         | 0.05 | 0.0007047        | 16.97  |
| 20F25188           | 22.3 % | ✓ 0.321579      | 0.56 | 0.0000000       | 0.00 | 0.0002334        | 23.00  | 0.0000017        | 148.84 | 0.863572         | 23.00  | 0.0606176       | 0.58 | 0.0000000       | 0.00 | 0.361957        | 0.11 | 0.0001554        | 24.93  | 0.0065275        | 148.84 | 29.9708         | 0.05 | 0.0005548        | 23.02  |
| Σ                  |        | 16.929437       | 0.07 | 0.0000000       | 0.00 | 0.0177459        | 1.66   | 0.0001160        | 10.65  | 65.652535        | 1.66   | 3.1911988       | 0.08 | 0.0000000       | 0.00 | 24.468262       | 0.02 | 0.0118175        | 2.79   | 0.4471411        | 10.66  | 2026.0216       | 0.01 | 0.0421818        | 1.67   |
| Σ                  |        |                 |      |                 |      |                  |        | 16.947299        | 0.07   | 65.652535        | 1.66   |                 |      |                 |      |                 |      | 28.118420        | 0.17   |                  |        |                 |      | 2026.0637        | 0.01   |

| 40Ar(r)<br>[fA] | %1σ   | 40Ar(a)<br>[fA] | %1σ  | 40Ar(c)<br>[fA] | %1σ  | 40Ar(k)<br>[fA] | %1σ  |
|-----------------|-------|-----------------|------|-----------------|------|-----------------|------|
| 5.4777          | 16.94 | 209.3852        | 0.38 | 0.0000000       | 0.00 | 0.0007721       | 9.67 |
| 2.8162          | 27.33 | 118.9648        | 0.52 | 0.0000000       | 0.00 | 0.0002674       | 9.85 |
| 6.8071          | 12.67 | 174.0047        | 0.42 | 0.0000000       | 0.00 | 0.0009943       | 9.66 |
| 4.9083          | 16.18 | 137.9583        | 0.47 | 0.0000000       | 0.00 | 0.0008150       | 9.67 |
| 14.8069         | 7.02  | 256.9890        | 0.36 | 0.0000000       | 0.00 | 0.0028159       | 9.65 |
| 9.8119          | 8.38  | 155.0102        | 0.44 | 0.0000000       | 0.00 | 0.0017148       | 9.66 |
| 4.2255          | 17.26 | 88.8341         | 0.64 | 0.0000000       | 0.00 | 0.0006573       | 9.68 |
| 24.1562         | 3.75  | 197.7187        | 0.39 | 0.0000000       | 0.00 | 0.0042163       | 9.65 |
| 38.7746         | 2.60  | 249.3661        | 0.36 | 0.0000000       | 0.00 | 0.0064559       | 9.65 |
| 65.8785         | 1.65  | 282.6448        | 0.35 | 0.0000000       | 0.00 | 0.0110104       | 9.65 |
| 84.5703         | 1.07  | 206.8790        | 0.37 | 0.0000000       | 0.00 | 0.0143034       | 9.65 |
| 185.4992        | 0.61  | 304.2193        | 0.34 | 0.0000000       | 0.00 | 0.0306430       | 9.65 |
| 212.6322        | 0.47  | 238.4640        | 0.37 | 0.0000000       | 0.00 | 0.0353601       | 9.65 |
| 376.1605        | 0.27  | 247.3255        | 0.37 | 0.0000000       | 0.00 | 0.0624119       | 9.65 |
| 394.6670        | 0.19  | 118.3739        | 0.51 | 0.0000000       | 0.00 | 0.0653547       | 9.65 |
| 432.7320        | 0.17  | 103.1282        | 0.57 | 0.0000000       | 0.00 | 0.0716676       | 9.65 |
| 563.9252        | 0.13  | 103.5104        | 0.57 | 0.0000000       | 0.00 | 0.0938995       | 9.65 |
| 642.9205        | 0.12  | 102.7892        | 0.57 | 0.0000000       | 0.00 | 0.1074994       | 9.65 |
| 595.0504        | 0.12  | 94.3880         | 0.60 | 0.0000000       | 0.00 | 0.0998348       | 9.65 |
| 554.5175        | 0.13  | 88.7098         | 0.64 | 0.0000000       | 0.00 | 0.0928534       | 9.65 |
| 517.5255        | 0.14  | 89.6341         | 0.63 | 0.0000000       | 0.00 | 0.0867699       | 9.65 |
| 425.0788        | 0.17  | 84.0835         | 0.66 | 0.0000000       | 0.00 | 0.0712891       | 9.65 |
| 393.2507        | 0.36  | 413.5529        | 0.32 | 0.0000000       | 0.00 | 0.0665253       | 9.65 |
| 354.3381        | 0.21  | 98.0194         | 0.58 | 0.0000000       | 0.00 | 0.0592106       | 9.65 |
| 288.8463        | 0.25  | 92.6171         | 0.61 | 0.0000000       | 0.00 | 0.0481476       | 9.65 |
| 241.4588        | 0.31  | 97.1230         | 0.59 | 0.0000000       | 0.00 | 0.0403319       | 9.65 |
| 213.4905        | 0.35  | 108.7299        | 0.55 | 0.0000000       | 0.00 | 0.0358621       | 9.65 |
| 179.8890        | 0.42  | 110.4626        | 0.54 | 0.0000000       | 0.00 | 0.0301970       | 9.65 |
| 160.4745        | 0.47  | 107.7558        | 0.56 | 0.0000000       | 0.00 | 0.0268758       | 9.65 |
| 140.7800        | 0.55  | 114.4014        | 0.54 | 0.0000000       | 0.00 | 0.0234242       | 9.65 |
| 115.4714        | 0.63  | 96.4694         | 0.59 | 0.0000000       | 0.00 | 0.0194226       | 9.65 |
| 109.0835        | 0.67  | 94.7145         | 0.60 | 0.0000000       | 0.00 | 0.0181923       | 9.65 |
| 7360.0245       | 0.07  | 4986.2270       | 0.08 | 0.0000000       | 0.00 | 1.2297951       | 2.27 |
| 12347.481       |       |                 |      |                 |      |                 | 0.05 |

| Additional Parameters |        | 40Ar/39Ar  | 1σ       | 37Ar/39Ar | 1σ       | 36Ar/39Ar | 1σ       | Time (days) | 37Ar (decay) | 39Ar (decay) | 40Ar (moles) |
|-----------------------|--------|------------|----------|-----------|----------|-----------|----------|-------------|--------------|--------------|--------------|
| 20F25145              | 0.3 %  | 168.893864 | 1.171183 | 0.253768  | 0.148567 | 0.558883  | 0.004074 | 159.456     | 23.383902    | 1.00112664   | 7.606E-12    |
| 20F25147              | 0.4 %  | 276.421040 | 5.494206 | 0.127169  | 0.430132 | 0.916847  | 0.018390 | 159.474     | 23.392243    | 1.00112677   | 4.311E-12    |
| 20F25148              | 0.5 %  | 110.385044 | 0.647815 | 0.010785  | 0.114727 | 0.360675  | 0.002291 | 159.483     | 23.396414    | 1.00112683   | 6.401E-12    |
| 20F25150              | 0.6 %  | 106.405525 | 0.744635 | 0.033297  | 0.146335 | 0.348870  | 0.002595 | 159.501     | 23.404760    | 1.00112696   | 5.058E-12    |
| 20F25151              | 0.7 %  | 58.588233  | 0.151966 | 0.031841  | 0.041253 | 0.188092  | 0.000648 | 159.510     | 23.408934    | 1.00112702   | 9.622E-12    |
| 20F25153              | 0.9 %  | 58.341460  | 0.245771 | 0.029001  | 0.070009 | 0.186298  | 0.000913 | 159.528     | 23.417284    | 1.00112715   | 5.835E-12    |
| 20F25154              | 1.1 %  | 85.943587  | 0.798773 | 0.066103  | 0.182120 | 0.278533  | 0.002742 | 159.537     | 23.421460    | 1.00112721   | 3.294E-12    |
| 20F25155              | 1.3 %  | 31.941479  | 0.080645 | 0.082270  | 0.027020 | 0.096663  | 0.000342 | 159.547     | 23.425958    | 1.00112728   | 7.855E-12    |
| 20F25157              | 1.5 %  | 27.091732  | 0.051029 | 0.037851  | 0.018169 | 0.079614  | 0.000237 | 159.565     | 23.434314    | 1.00112741   | 1.020E-11    |
| 20F25158              | 1.8 %  | 19.214106  | 0.028709 | 0.033858  | 0.010864 | 0.052913  | 0.000145 | 159.574     | 23.438493    | 1.00112747   | 1.234E-11    |
| 20F25159              | 2.2 %  | 12.368701  | 0.020936 | 0.033945  | 0.008147 | 0.029817  | 0.000091 | 159.583     | 23.442673    | 1.00112754   | 1.032E-11    |
| 20F25161              | 2.6 %  | 9.701121   | 0.010137 | 0.034582  | 0.003720 | 0.020469  | 0.000052 | 159.601     | 23.451035    | 1.00112766   | 1.734E-11    |
| 20F25162              | 3.1 %  | 7.744049   | 0.008651 | 0.037489  | 0.003398 | 0.013908  | 0.000041 | 159.610     | 23.455217    | 1.00112773   | 1.597E-11    |
| 20F25163              | 3.6 %  | 6.064308   | 0.005145 | 0.037568  | 0.001778 | 0.008177  | 0.000024 | 159.619     | 23.459400    | 1.00112779   | 2.207E-11    |
| 20F25165              | 4.1 %  | 4.765514   | 0.004726 | 0.034687  | 0.001783 | 0.003742  | 0.000017 | 159.638     | 23.468089    | 1.00112792   | 1.816E-11    |
| 20F25166              | 4.7 %  | 4.539054   | 0.004331 | 0.035404  | 0.001640 | 0.002975  | 0.000015 | 159.647     | 23.472275    | 1.00112799   | 1.897E-11    |
| 20F25167              | 5.3 %  | 4.315060   | 0.003456 | 0.033118  | 0.001232 | 0.002281  | 0.000012 | 159.656     | 23.476460    | 1.00112805   | 2.363E-11    |
| 20F25169              | 6.0 %  | 4.211201   | 0.003108 | 0.032769  | 0.001071 | 0.001979  | 0.000010 | 159.674     | 23.484834    | 1.00112818   | 2.640E-11    |
| 20F25170              | 6.8 %  | 4.192339   | 0.003277 | 0.031542  | 0.001176 | 0.001957  | 0.000011 | 159.683     | 23.489022    | 1.00112824   | 2.441E-11    |
| 20F25171              | 7.5 %  | 4.205421   | 0.003466 | 0.030364  | 0.001233 | 0.001977  | 0.000012 | 159.692     | 23.493211    | 1.00112831   | 2.277E-11    |
| 20F25173              | 8.3 %  | 4.247920   | 0.003658 | 0.030498  | 0.001359 | 0.002137  | 0.000013 | 159.710     | 23.501591    | 1.00112843   | 2.150E-11    |
| 20F25174              | 9.1 %  | 4.335852   | 0.004323 | 0.030014  | 0.001622 | 0.002439  | 0.000015 | 159.719     | 23.505782    | 1.00112850   | 1.803E-11    |
| 20F25175              | 10.1 % | 7.362022   | 0.005210 | 0.030251  | 0.001700 | 0.012820  | 0.000030 | 159.728     | 23.509974    | 1.00112856   | 2.856E-11    |
| 20F25177              | 11.2 % | 4.637881   | 0.005113 | 0.030401  | 0.002022 | 0.003420  | 0.000018 | 159.747     | 23.518683    | 1.00112869   | 1.602E-11    |
| 20F25178              | 12.4 % | 4.809655   | 0.006183 | 0.028516  | 0.002533 | 0.003972  | 0.000022 | 159.756     | 23.522877    | 1.00112876   | 1.351E-11    |
| 20F25179              | 13.6 % | 5.096214   | 0.007314 | 0.028052  | 0.002984 | 0.004971  | 0.000027 | 159.765     | 23.527072    | 1.00112882   | 1.199E-11    |
| 20F25181              | 14.9 % | 5.454386   | 0.008204 | 0.031905  | 0.003138 | 0.006257  | 0.000031 | 159.783     | 23.535464    | 1.00112895   | 1.141E-11    |
| 20F25182              | 16.2 % | 5.836947   | 0.009672 | 0.031535  | 0.003924 | 0.007547  | 0.000037 | 159.792     | 23.539661    | 1.00112901   | 1.028E-11    |
| 20F25183              | 17.6 % | 6.058574   | 0.010814 | 0.029164  | 0.004267 | 0.008271  | 0.000042 | 159.801     | 23.543859    | 1.00112908   | 9.496E-12    |
| 20F25185              | 19.0 % | 6.613099   | 0.012408 | 0.031115  | 0.005223 | 0.010074  | 0.000049 | 159.819     | 23.552257    | 1.00112921   | 9.034E-12    |
| 20F25186              | 20.5 % | 6.624093   | 0.014852 | 0.034276  | 0.005808 | 0.010245  | 0.000056 | 159.829     | 23.556780    | 1.00112927   | 7.503E-12    |
| 20F25188              | 22.3 % | 6.800366   | 0.015872 | 0.028813  | 0.006627 | 0.010737  | 0.000060 | 159.847     | 23.565183    | 1.00112940   | 7.215E-12    |

| Procedure<br>Blanks |        | 36Ar ± 1σ (SE)<br>[fA] | 37Ar ± 1σ (SE)<br>[fA] | 38Ar ± 1σ (SE)<br>[fA] | 39Ar ± 1σ (SE)<br>[fA] | 40Ar ± 1σ (SE)<br>[fA] |
|---------------------|--------|------------------------|------------------------|------------------------|------------------------|------------------------|
| 20F25145            | 0.3 %  | 0.0212720 ±0.0014440   | 0.0217541 ±0.0057432   | 0.0005233 ±0.0064824   | 0.0091651 ±0.0061163   | 6.1511061 ±0.4619046   |
| 20F25147            | 0.4 %  | 0.0235307 ±0.0014440   | 0.0189728 ±0.0057432   | 0.0039238 ±0.0064824   | 0.0139181 ±0.0061163   | 6.9043300 ±0.4619046   |
| 20F25148            | 0.5 %  | 0.0242694 ±0.0014440   | 0.0178544 ±0.0057432   | 0.0050654 ±0.0064824   | 0.0150868 ±0.0061163   | 7.1467753 ±0.4619046   |
| 20F25150            | 0.6 %  | 0.0251014 ±0.0014440   | 0.0161133 ±0.0057432   | 0.0064450 ±0.0064824   | 0.0155667 ±0.0061163   | 7.4113613 ±0.4619046   |
| 20F25151            | 0.7 %  | 0.0252450 ±0.0014440   | 0.0154714 ±0.0057432   | 0.0067617 ±0.0064824   | 0.0150828 ±0.0061163   | 7.4513299 ±0.4619046   |
| 20F25153            | 0.9 %  | 0.0251039 ±0.0014440   | 0.0145977 ±0.0057432   | 0.0068296 ±0.0064824   | 0.0131327 ±0.0061163   | 7.3877286 ±0.4619046   |
| 20F25154            | 1.1 %  | 0.0248621 ±0.0014440   | 0.0143475 ±0.0057432   | 0.0066464 ±0.0064824   | 0.0118344 ±0.0061163   | 7.2992193 ±0.4619046   |
| 20F25155            | 1.3 %  | 0.0245040 ±0.0014440   | 0.0142033 ±0.0057432   | 0.0063328 ±0.0064824   | 0.0103107 ±0.0061163   | 7.1721765 ±0.4619046   |
| 20F25157            | 1.5 %  | 0.0236451 ±0.0014440   | 0.0142432 ±0.0057432   | 0.0055421 ±0.0064824   | 0.0074147 ±0.0061163   | 6.8750641 ±0.4619046   |
| 20F25158            | 1.8 %  | 0.0231543 ±0.0014440   | 0.0143952 ±0.0057432   | 0.0050938 ±0.0064824   | 0.0060543 ±0.0061163   | 6.7082198 ±0.4619046   |
| 20F25159            | 2.2 %  | 0.0226421 ±0.0014440   | 0.0146238 ±0.0057432   | 0.0046385 ±0.0064824   | 0.0048204 ±0.0061163   | 6.5359481 ±0.4619046   |
| 20F25161            | 2.6 %  | 0.0216045 ±0.0014440   | 0.0152770 ±0.0057432   | 0.0037776 ±0.0064824   | 0.0028988 ±0.0061163   | 6.1926487 ±0.4619046   |
| 20F25162            | 3.1 %  | 0.0211014 ±0.0014440   | 0.0156851 ±0.0057432   | 0.0034022 ±0.0064824   | 0.0022793 ±0.0061163   | 6.0292311 ±0.4619046   |
| 20F25163            | 3.6 %  | 0.0206216 ±0.0014440   | 0.0161366 ±0.0057432   | 0.0030798 ±0.0064824   | 0.0019224 ±0.0061163   | 5.8756064 ±0.4619046   |
| 20F25165            | 4.1 %  | 0.0197325 ±0.0014440   | 0.0171789 ±0.0057432   | 0.0026189 ±0.0064824   | 0.0020941 ±0.0061163   | 5.5988069 ±0.4619046   |
| 20F25166            | 4.7 %  | 0.0193689 ±0.0014440   | 0.0177147 ±0.0057432   | 0.0025104 ±0.0064824   | 0.0026353 ±0.0061163   | 5.4899451 ±0.4619046   |
| 20F25167            | 5.3 %  | 0.0190531 ±0.0014440   | 0.0182622 ±0.0057432   | 0.0024801 ±0.0064824   | 0.0034765 ±0.0061163   | 5.3987955 ±0.4619046   |
| 20F25169            | 6.0 %  | 0.0185751 ±0.0014440   | 0.0193624 ±0.0057432   | 0.0026544 ±0.0064824   | 0.0060260 ±0.0061163   | 5.2722581 ±0.4619046   |
| 20F25170            | 6.8 %  | 0.0184148 ±0.0014440   | 0.0199005 ±0.0057432   | 0.0028536 ±0.0064824   | 0.0077029 ±0.0061163   | 5.2370301 ±0.4619046   |
| 20F25171            | 7.5 %  | 0.0183061 ±0.0014440   | 0.0204210 ±0.0057432   | 0.0031203 ±0.0064824   | 0.0096165 ±0.0061163   | 5.2198336 ±0.4619046   |
| 20F25173            | 8.3 %  | 0.0182330 ±0.0014440   | 0.0213815 ±0.0057432   | 0.0038211 ±0.0064824   | 0.0140229 ±0.0061163   | 5.2347815 ±0.4619046   |
| 20F25174            | 9.1 %  | 0.0182603 ±0.0014440   | 0.0218077 ±0.0057432   | 0.0042321 ±0.0064824   | 0.0164347 ±0.0061163   | 5.2633958 ±0.4619046   |
| 20F25175            | 10.1 % | 0.0183226 ±0.0014440   | 0.0221890 ±0.0057432   | 0.0046646 ±0.0064824   | 0.0189214 ±0.0061163   | 5.3029817 ±0.4619046   |
| 20F25177            | 11.2 % | 0.0185302 ±0.0014440   | 0.0228092 ±0.0057432   | 0.0055551 ±0.0064824   | 0.0240755 ±0.0061163   | 5.4070456 ±0.4619046   |
| 20F25178            | 12.4 % | 0.0186486 ±0.0014440   | 0.0230118 ±0.0057432   | 0.0059375 ±0.0064824   | 0.0264153 ±0.0061163   | 5.4600850 ±0.4619046   |
| 20F25179            | 13.6 % | 0.0187640 ±0.0014440   | 0.0231436 ±0.0057432   | 0.0062583 ±0.0064824   | 0.0285634 ±0.0061163   | 5.5093066 ±0.4619046   |
| 20F25181            | 14.9 % | 0.0189350 ±0.0014440   | 0.0231707 ±0.0057432   | 0.0066090 ±0.0064824   | 0.0319541 ±0.0061163   | 5.5766414 ±0.4619046   |
| 20F25182            | 16.2 % | 0.0189617 ±0.0014440   | 0.0230541 ±0.0057432   | 0.0065804 ±0.0064824   | 0.0330162 ±0.0061163   | 5.5837743 ±0.4619046   |
| 20F25183            | 17.6 % | 0.0189280 ±0.0014440   | 0.0228433 ±0.0057432   | 0.0063732 ±0.0064824   | 0.0335255 ±0.0061163   | 5.5651285 ±0.4619046   |
| 20F25185            | 19.0 % | 0.0186076 ±0.0014440   | 0.0221164 ±0.0057432   | 0.0052816 ±0.0064824   | 0.0324562 ±0.0061163   | 5.4234668 ±0.4619046   |
| 20F25186            | 20.5 % | 0.0182515 ±0.0014440   | 0.0215443 ±0.0057432   | 0.0042342 ±0.0064824   | 0.0304683 ±0.0061163   | 5.2730119 ±0.4619046   |
| 20F25188            | 22.3 % | 0.0171377 ±0.0014440   | 0.0201191 ±0.0057432   | 0.0012194 ±0.0064824   | 0.0235059 ±0.0061163   | 4.8139518 ±0.4619046   |

| Intercept Values |        | 36Ar ± 1σ (SE)<br>[fA] | r2     | Regression<br>(type,n) | 37Ar ± 1σ (SE)<br>[fA] | r2     | Regression<br>(type,n) | 38Ar ± 1σ (SE)<br>[fA] | r2     | Regression<br>(type,n) | 39Ar ± 1σ (SE)<br>[fA] | r2     | Regression<br>(type,n) | 40Ar ± 1σ (SE)<br>[fA] |
|------------------|--------|------------------------|--------|------------------------|------------------------|--------|------------------------|------------------------|--------|------------------------|------------------------|--------|------------------------|------------------------|
| 20F25145         | 0.3 %  | 0.7099945 ±0.0011745   | 0.9749 | EXP 147 of 150         | 0.0079474 ±0.0056868   | 0.0087 | EXP 149 of 150         | 0.1347160 ±0.0063572   | 0.0020 | EXP 148 of 150         | 1.279936 ±0.005702     | 0.2479 | EXP 150 of 150         | 221.01475 ±0.02554     |
| 20F25147         | 0.4 %  | 0.4148045 ±0.0009313   | 0.9468 | EXP 150 of 150         | 0.0165776 ±0.0057137   | 0.0035 | EXP 146 of 150         | 0.0810712 ±0.0064999   | 0.0133 | EXP 148 of 150         | 0.483994 ±0.006023     | 0.1956 | EXP 150 of 150         | 128.68561 ±0.02059     |
| 20F25148         | 0.5 %  | 0.5965507 ±0.0010996   | 0.9658 | EXP 150 of 150         | 0.0170993 ±0.0056159   | 0.0002 | EXP 149 of 150         | 0.1262064 ±0.0062212   | 0.0140 | EXP 148 of 150         | 1.651289 ±0.006072     | 0.6732 | EXP 147 of 150         | 187.95956 ±0.02622     |
| 20F25150         | 0.6 %  | 0.4788409 ±0.0009433   | 0.9594 | EXP 149 of 150         | 0.0142030 ±0.0061234   | 0.0000 | EXP 150 of 150         | 0.1082992 ±0.0063452   | 0.0272 | EXP 150 of 150         | 1.356747 ±0.005619     | 0.5589 | EXP 150 of 150         | 150.27879 ±0.02222     |
| 20F25151         | 0.7 %  | 0.8704861 ±0.0013990   | 0.9767 | EXP 148 of 150         | 0.0091609 ±0.0058189   | 0.0000 | EXP 150 of 150         | 0.2241822 ±0.0067836   | 0.0996 | EXP 150 of 150         | 4.649072 ±0.006454     | 0.9742 | EXP 150 of 150         | 279.24999 ±0.02643     |
| 20F25153         | 0.9 %  | 0.5349333 ±0.0009887   | 0.9663 | EXP 148 of 150         | 0.0110988 ±0.0061936   | 0.0000 | EXP 149 of 150         | 0.1325279 ±0.0055919   | 0.0245 | EXP 147 of 150         | 2.835157 ±0.006328     | 0.9214 | EXP 149 of 150         | 172.21158 ±0.02249     |
| 20F25154         | 1.1 %  | 0.3170092 ±0.0008478   | 0.9228 | EXP 150 of 150         | 0.0174037 ±0.0061573   | 0.0001 | EXP 150 of 150         | 0.0763475 ±0.0064163   | 0.0291 | EXP 150 of 150         | 1.093440 ±0.005881     | 0.4212 | EXP 149 of 150         | 100.35951 ±0.02155     |
| 20F25155         | 1.3 %  | 0.6749259 ±0.0011548   | 0.9721 | EXP 150 of 150         | 0.0101931 ±0.0055859   | 0.0535 | EXP 150 of 150         | 0.2186017 ±0.0073376   | 0.0990 | EXP 150 of 150         | 6.949034 ±0.007290     | 0.9875 | EXP 149 of 150         | 229.05138 ±0.02334     |
| 20F25157         | 1.5 %  | 0.8438824 ±0.0012702   | 0.9781 | EXP 145 of 150         | 0.0029367 ±0.0059172   | 0.0006 | EXP 150 of 150         | 0.2918790 ±0.0064092   | 0.1691 | EXP 149 of 150         | 10.631599 ±0.007421    | 0.9949 | EXP 149 of 150         | 295.02228 ±0.02902     |
| 20F25158         | 1.8 %  | 0.9528970 ±0.0013789   | 0.9800 | EXP 149 of 150         | 0.0118098 ±0.0061399   | 0.0011 | EXP 150 of 150         | 0.4093110 ±0.0063817   | 0.3133 | EXP 149 of 150         | 18.125430 ±0.008222    | 0.9980 | EXP 150 of 150         | 355.24251 ±0.03032     |
| 20F25159         | 2.2 %  | 0.7032502 ±0.0009831   | 0.9809 | EXP 150 of 150         | 0.0194996 ±0.0058361   | 0.0049 | EXP 150 of 150         | 0.4254729 ±0.0069465   | 0.3026 | EXP 150 of 150         | 23.543280 ±0.008359    | 0.9988 | EXP 150 of 150         | 297.99952 ±0.03084     |
| 20F25161         | 2.6 %  | 1.0225952 ±0.0013610   | 0.9829 | EXP 147 of 150         | 0.0591717 ±0.0055699   | 0.0024 | EXP 150 of 150         | 0.8006558 ±0.0057050   | 0.5946 | EXP 150 of 150         | 50.430639 ±0.009300    | 0.9997 | EXP 149 of 150         | 495.94172 ±0.03409     |
| 20F25162         | 3.1 %  | 0.8059483 ±0.0012917   | 0.9745 | EXP 150 of 150         | 0.0774308 ±0.0061702   | 0.0243 | EXP 150 of 150         | 0.8579619 ±0.0071798   | 0.5727 | EXP 150 of 150         | 58.192880 ±0.010769    | 0.9997 | EXP 150 of 150         | 457.16074 ±0.03363     |
| 20F25163         | 3.6 %  | 0.8350535 ±0.0014451   | 0.9695 | EXP 148 of 150         | 0.1485326 ±0.0052115   | 0.0827 | EXP 150 of 150         | 1.4070656 ±0.0055415   | 0.8688 | EXP 149 of 150         | 102.710488 ±0.012809   | 0.9999 | EXP 150 of 150         | 629.42403 ±0.03536     |
| 20F25165         | 4.1 %  | 0.4100253 ±0.0008662   | 0.9346 | EXP 150 of 150         | 0.1419699 ±0.0057773   | 0.0712 | EXP 150 of 150         | 1.3674803 ±0.0062039   | 0.8321 | EXP 149 of 150         | 107.553286 ±0.014037   | 0.9998 | EXP 150 of 150         | 518.70504 ±0.03332     |
| 20F25166         | 4.7 %  | 0.3596374 ±0.0008704   | 0.9106 | EXP 148 of 150         | 0.1603828 ±0.0058639   | 0.1314 | EXP 150 of 150         | 1.4850203 ±0.0066345   | 0.8378 | EXP 150 of 150         | 117.942864 ±0.012937   | 0.9999 | EXP 149 of 150         | 541.42186 ±0.03471     |
| 20F25167         | 5.3 %  | 0.3608254 ±0.0008995   | 0.8943 | EXP 150 of 150         | 0.1999809 ±0.0056455   | 0.1675 | EXP 150 of 150         | 1.9241178 ±0.0074934   | 0.8729 | EXP 150 of 150         | 154.529370 ±0.014998   | 0.9999 | EXP 149 of 150         | 672.92829 ±0.03686     |
| 20F25169         | 6.0 %  | 0.3581535 ±0.0008486   | 0.9006 | EXP 149 of 150         | 0.2277632 ±0.0055586   | 0.1615 | EXP 150 of 150         | 2.1897700 ±0.0066168   | 0.9230 | EXP 150 of 150         | 176.912619 ±0.015905   | 0.9999 | EXP 147 of 150         | 751.08939 ±0.04129     |
| 20F25170         | 6.8 %  | 0.3302019 ±0.0008414   | 0.8789 | EXP 149 of 150         | 0.2009770 ±0.0058063   | 0.1010 | EXP 150 of 150         | 2.0404033 ±0.0057657   | 0.9257 | EXP 150 of 150         | 164.300857 ±0.015400   | 0.9999 | EXP 150 of 150         | 694.77524 ±0.03994     |
| 20F25171         | 7.5 %  | 0.3112832 ±0.0008801   | 0.8451 | EXP 150 of 150         | 0.1773029 ±0.0055325   | 0.0928 | EXP 150 of 150         | 1.9304828 ±0.0070265   | 0.8991 | EXP 150 of 150         | 152.813776 ±0.015515   | 0.9999 | EXP 148 of 150         | 648.53993 ±0.03637     |
| 20F25173         | 8.3 %  | 0.3141771 ±0.0008412   | 0.8728 | EXP 150 of 150         | 0.1641344 ±0.0058849   | 0.1115 | EXP 150 of 150         | 1.8157552 ±0.0064472   | 0.8911 | EXP 148 of 150         | 142.806769 ±0.013590   | 0.9999 | EXP 149 of 150         | 612.48119 ±0.03577     |
| 20F25174         | 9.1 %  | 0.2957287 ±0.0008027   | 0.8820 | EXP 150 of 150         | 0.1281652 ±0.0056786   | 0.0950 | EXP 150 of 150         | 1.4957977 ±0.0063434   | 0.8608 | EXP 150 of 150         | 117.333189 ±0.014837   | 0.9999 | EXP 150 of 150         | 514.49701 ±0.03210     |
| 20F25175         | 10.1 % | 1.3793144 ±0.0017495   | 0.9844 | EXP 150 of 150         | 0.1188445 ±0.0054199   | 0.0842 | EXP 149 of 150         | 1.6139220 ±0.0066994   | 0.8587 | EXP 149 of 150         | 109.496183 ±0.015052   | 0.9998 | EXP 150 of 150         | 812.17304 ±0.04005     |
| 20F25177         | 11.2 % | 0.3416874 ±0.0008256   | 0.9174 | EXP 148 of 150         | 0.1032916 ±0.0060852   | 0.0364 | EXP 150 of 150         | 1.2713286 ±0.0064642   | 0.8049 | EXP 147 of 150         | 97.463865 ±0.012262    | 0.9999 | EXP 149 of 150         | 457.82371 ±0.03103     |
| 20F25178         | 12.4 % | 0.3238520 ±0.0007985   | 0.9056 | EXP 148 of 150         | 0.0731540 ±0.0063066   | 0.0254 | EXP 150 of 150         | 1.0388627 ±0.0065578   | 0.7349 | EXP 150 of 150         | 79.260322 ±0.012823    | 0.9998 | EXP 150 of 150         | 386.97160 ±0.02976     |
| 20F25179         | 13.6 % | 0.3386854 ±0.0008588   | 0.9034 | EXP 150 of 150         | 0.0560844 ±0.0061575   | 0.0043 | EXP 149 of 150         | 0.8971799 ±0.0063252   | 0.7035 | EXP 149 of 150         | 66.400577 ±0.012094    | 0.9997 | EXP 150 of 150         | 344.13146 ±0.03120     |
| 20F25181         | 14.9 % | 0.3770302 ±0.0008745   | 0.9379 | EXP 148 of 150         | 0.0569261 ±0.0053781   | 0.0567 | EXP 147 of 150         | 0.7955690 ±0.0071956   | 0.5611 | EXP 150 of 150         | 59.048347 ±0.011818    | 0.9996 | EXP 149 of 150         | 327.83282 ±0.02959     |
| 20F25182         | 16.2 % | 0.3826757 ±0.0009147   | 0.9355 | EXP 150 of 150         | 0.0435948 ±0.0059749   | 0.0335 | EXP 150 of 150         | 0.6950107 ±0.0065152   | 0.5381 | EXP 150 of 150         | 49.726663 ±0.010282    | 0.9996 | EXP 148 of 150         | 295.96556 ±0.02690     |
| 20F25183         | 17.6 % | 0.3736670 ±0.0009209   | 0.9264 | EXP 150 of 150         | 0.0320070 ±0.0055998   | 0.0092 | EXP 149 of 150         | 0.6268722 ±0.0069222   | 0.4563 | EXP 150 of 150         | 44.261614 ±0.009321    | 0.9996 | EXP 149 of 150         | 273.82234 ±0.02518     |
| 20F25185         | 19.0 % | 0.3951766 ±0.0009559   | 0.9316 | EXP 150 of 150         | 0.0288687 ±0.0063406   | 0.0166 | EXP 150 of 150         | 0.5523390 ±0.0069704   | 0.3959 | EXP 148 of 150         | 38.580388 ±0.009530    | 0.9994 | EXP 149 of 150         | 260.62834 ±0.02481     |
| 20F25186         | 20.5 % | 0.3358164 ±0.0007897   | 0.9386 | EXP 149 of 150         | 0.0250172 ±0.0054051   | 0.0134 | EXP 149 of 150         | 0.4589988 ±0.0062951   | 0.3028 | EXP 149 of 150         | 31.993288 ±0.008939    | 0.9993 | EXP 149 of 150         | 217.23324 ±0.02552     |
| 20F25188         | 22.3 % | 0.3288681 ±0.0008566   | 0.9191 | EXP 150 of 150         | 0.0165288 ±0.0061667   | 0.0077 | EXP 149 of 150         | 0.4280529 ±0.0071546   | 0.2667 | EXP 150 of 150         | 29.961562 ±0.009632    | 0.9990 | EXP 150 of 150         | 208.63020 ±0.02703     |

| r2     | Regression<br>(type,n) |            |
|--------|------------------------|------------|
| 0.9998 | EXP                    | 150 of 150 |
| 0.9995 | EXP                    | 148 of 150 |
| 0.9997 | EXP                    | 150 of 150 |
| 0.9996 | EXP                    | 150 of 150 |
| 0.9999 | EXP                    | 150 of 150 |
| 0.9997 | EXP                    | 150 of 150 |
| 0.9990 | EXP                    | 150 of 150 |
| 0.9999 | EXP                    | 149 of 150 |
| 0.9999 | EXP                    | 149 of 150 |
| 0.9999 | EXP                    | 150 of 150 |
| 0.9999 | EXP                    | 150 of 150 |
| 0.9999 | EXP                    | 150 of 150 |
| 0.9999 | EXP                    | 150 of 150 |
| 1.0000 | EXP                    | 149 of 150 |
| 0.9999 | EXP                    | 150 of 150 |
| 0.9999 | EXP                    | 150 of 150 |
| 1.0000 | EXP                    | 150 of 150 |
| 1.0000 | EXP                    | 149 of 150 |
| 1.0000 | EXP                    | 150 of 150 |
| 1.0000 | EXP                    | 150 of 150 |
| 1.0000 | EXP                    | 149 of 150 |
| 1.0000 | EXP                    | 147 of 150 |
| 1.0000 | EXP                    | 148 of 150 |
| 0.9999 | EXP                    | 150 of 150 |
| 0.9999 | EXP                    | 149 of 150 |
| 0.9999 | EXP                    | 150 of 150 |
| 0.9999 | EXP                    | 149 of 150 |
| 0.9999 | EXP                    | 150 of 150 |
| 0.9999 | EXP                    | 148 of 150 |
| 0.9999 | EXP                    | 150 of 150 |
| 0.9998 | EXP                    | 147 of 150 |
| 0.9998 | EXP                    | 150 of 150 |

| Project Info |        | Analyst     | Irradiation | X-pos | Y-pos | Z/H-pos | Project                | Experiment | Nmb |
|--------------|--------|-------------|-------------|-------|-------|---------|------------------------|------------|-----|
| 20F25145     | 0.3 %  | Dan Miggins | 20-OSU-01   | 0.00  | 0.00  | 37.10   | Oregon\Swenton (18-58) | 20F25141   | 01  |
| 20F25147     | 0.4 %  | Dan Miggins | 20-OSU-01   | 0.00  | 0.00  | 37.10   | Oregon\Swenton (18-58) | 20F25141   | 01  |
| 20F25148     | 0.5 %  | Dan Miggins | 20-OSU-01   | 0.00  | 0.00  | 37.10   | Oregon\Swenton (18-58) | 20F25141   | 01  |
| 20F25150     | 0.6 %  | Dan Miggins | 20-OSU-01   | 0.00  | 0.00  | 37.10   | Oregon\Swenton (18-58) | 20F25141   | 01  |
| 20F25151     | 0.7 %  | Dan Miggins | 20-OSU-01   | 0.00  | 0.00  | 37.10   | Oregon\Swenton (18-58) | 20F25141   | 01  |
| 20F25153     | 0.9 %  | Dan Miggins | 20-OSU-01   | 0.00  | 0.00  | 37.10   | Oregon\Swenton (18-58) | 20F25141   | 01  |
| 20F25154     | 1.1 %  | Dan Miggins | 20-OSU-01   | 0.00  | 0.00  | 37.10   | Oregon\Swenton (18-58) | 20F25141   | 01  |
| 20F25155     | 1.3 %  | Dan Miggins | 20-OSU-01   | 0.00  | 0.00  | 37.10   | Oregon\Swenton (18-58) | 20F25141   | 01  |
| 20F25157     | 1.5 %  | Dan Miggins | 20-OSU-01   | 0.00  | 0.00  | 37.10   | Oregon\Swenton (18-58) | 20F25141   | 01  |
| 20F25158     | 1.8 %  | Dan Miggins | 20-OSU-01   | 0.00  | 0.00  | 37.10   | Oregon\Swenton (18-58) | 20F25141   | 01  |
| 20F25159     | 2.2 %  | Dan Miggins | 20-OSU-01   | 0.00  | 0.00  | 37.10   | Oregon\Swenton (18-58) | 20F25141   | 01  |
| 20F25161     | 2.6 %  | Dan Miggins | 20-OSU-01   | 0.00  | 0.00  | 37.10   | Oregon\Swenton (18-58) | 20F25141   | 01  |
| 20F25162     | 3.1 %  | Dan Miggins | 20-OSU-01   | 0.00  | 0.00  | 37.10   | Oregon\Swenton (18-58) | 20F25141   | 01  |
| 20F25163     | 3.6 %  | Dan Miggins | 20-OSU-01   | 0.00  | 0.00  | 37.10   | Oregon\Swenton (18-58) | 20F25141   | 01  |
| 20F25165     | 4.1 %  | Dan Miggins | 20-OSU-01   | 0.00  | 0.00  | 37.10   | Oregon\Swenton (18-58) | 20F25141   | 01  |
| 20F25166     | 4.7 %  | Dan Miggins | 20-OSU-01   | 0.00  | 0.00  | 37.10   | Oregon\Swenton (18-58) | 20F25141   | 01  |
| 20F25167     | 5.3 %  | Dan Miggins | 20-OSU-01   | 0.00  | 0.00  | 37.10   | Oregon\Swenton (18-58) | 20F25141   | 01  |
| 20F25169     | 6.0 %  | Dan Miggins | 20-OSU-01   | 0.00  | 0.00  | 37.10   | Oregon\Swenton (18-58) | 20F25141   | 01  |
| 20F25170     | 6.8 %  | Dan Miggins | 20-OSU-01   | 0.00  | 0.00  | 37.10   | Oregon\Swenton (18-58) | 20F25141   | 01  |
| 20F25171     | 7.5 %  | Dan Miggins | 20-OSU-01   | 0.00  | 0.00  | 37.10   | Oregon\Swenton (18-58) | 20F25141   | 01  |
| 20F25173     | 8.3 %  | Dan Miggins | 20-OSU-01   | 0.00  | 0.00  | 37.10   | Oregon\Swenton (18-58) | 20F25141   | 01  |
| 20F25174     | 9.1 %  | Dan Miggins | 20-OSU-01   | 0.00  | 0.00  | 37.10   | Oregon\Swenton (18-58) | 20F25141   | 01  |
| 20F25175     | 10.1 % | Dan Miggins | 20-OSU-01   | 0.00  | 0.00  | 37.10   | Oregon\Swenton (18-58) | 20F25141   | 01  |
| 20F25177     | 11.2 % | Dan Miggins | 20-OSU-01   | 0.00  | 0.00  | 37.10   | Oregon\Swenton (18-58) | 20F25141   | 01  |
| 20F25178     | 12.4 % | Dan Miggins | 20-OSU-01   | 0.00  | 0.00  | 37.10   | Oregon\Swenton (18-58) | 20F25141   | 01  |
| 20F25179     | 13.6 % | Dan Miggins | 20-OSU-01   | 0.00  | 0.00  | 37.10   | Oregon\Swenton (18-58) | 20F25141   | 01  |
| 20F25181     | 14.9 % | Dan Miggins | 20-OSU-01   | 0.00  | 0.00  | 37.10   | Oregon\Swenton (18-58) | 20F25141   | 01  |
| 20F25182     | 16.2 % | Dan Miggins | 20-OSU-01   | 0.00  | 0.00  | 37.10   | Oregon\Swenton (18-58) | 20F25141   | 01  |
| 20F25183     | 17.6 % | Dan Miggins | 20-OSU-01   | 0.00  | 0.00  | 37.10   | Oregon\Swenton (18-58) | 20F25141   | 01  |
| 20F25185     | 19.0 % | Dan Miggins | 20-OSU-01   | 0.00  | 0.00  | 37.10   | Oregon\Swenton (18-58) | 20F25141   | 01  |
| 20F25186     | 20.5 % | Dan Miggins | 20-OSU-01   | 0.00  | 0.00  | 37.10   | Oregon\Swenton (18-58) | 20F25141   | 01  |
| 20F25188     | 22.3 % | Dan Miggins | 20-OSU-01   | 0.00  | 0.00  | 37.10   | Oregon\Swenton (18-58) | 20F25141   | 01  |



| OSU Argon Geochronology Lab<br>CEOAS Oregon State University, Corvallis, USA |        |          |            |               |                  |                  |       |                     |                    |       |            |       |               |       |           |       |              |                        |     |       |      |      |     |        |  |
|------------------------------------------------------------------------------|--------|----------|------------|---------------|------------------|------------------|-------|---------------------|--------------------|-------|------------|-------|---------------|-------|-----------|-------|--------------|------------------------|-----|-------|------|------|-----|--------|--|
| Sample Parameters                                                            |        | Sample   | Material   | Location      | Standard Name    | Standard (in Ma) | %1σ   | Standard Reference  | Standard 40Ar/39Ar | %1σ   | J          | %1σ   | Air 40Ar/36Ar | %1σ   | MDF (lin) | %1σ   | Volume Ratio | Sensitivity (mol/volt) | Day | Month | Year | Hour | Min | Resist |  |
| 20F25145                                                                     | 0.3 %  | VS17-035 | Groundmass | Mustang Butte | FCT-NM (1C27-20) | 28.201           | 0.082 | Kuiper et al (2008) | 9.47349            | 0.156 | 0.00163884 | 0.156 | 298.54        | 0.114 | 1.0000168 | 0.039 | 1            | 3.54E-14               | 23  | SEP   | 2020 | 1    | 28  | 1      |  |
| 20F25147                                                                     | 0.4 %  | VS17-035 | Groundmass | Mustang Butte | FCT-NM (1C27-20) | 28.201           | 0.082 | Kuiper et al (2008) | 9.47349            | 0.156 | 0.00163884 | 0.156 | 298.54        | 0.114 | 1.0000168 | 0.039 | 1            | 3.54E-14               | 23  | SEP   | 2020 | 1    | 54  | 1      |  |
| 20F25148                                                                     | 0.5 %  | VS17-035 | Groundmass | Mustang Butte | FCT-NM (1C27-20) | 28.201           | 0.082 | Kuiper et al (2008) | 9.47349            | 0.156 | 0.00163884 | 0.156 | 298.54        | 0.114 | 1.0000168 | 0.039 | 1            | 3.54E-14               | 23  | SEP   | 2020 | 2    | 7   | 1      |  |
| 20F25150                                                                     | 0.6 %  | VS17-035 | Groundmass | Mustang Butte | FCT-NM (1C27-20) | 28.201           | 0.082 | Kuiper et al (2008) | 9.47349            | 0.156 | 0.00163884 | 0.156 | 298.54        | 0.114 | 1.0000168 | 0.039 | 1            | 3.54E-14               | 23  | SEP   | 2020 | 2    | 33  | 1      |  |
| 20F25151                                                                     | 0.7 %  | VS17-035 | Groundmass | Mustang Butte | FCT-NM (1C27-20) | 28.201           | 0.082 | Kuiper et al (2008) | 9.47349            | 0.156 | 0.00163884 | 0.156 | 298.54        | 0.114 | 1.0000168 | 0.039 | 1            | 3.54E-14               | 23  | SEP   | 2020 | 2    | 46  | 1      |  |
| 20F25153                                                                     | 0.9 %  | VS17-035 | Groundmass | Mustang Butte | FCT-NM (1C27-20) | 28.201           | 0.082 | Kuiper et al (2008) | 9.47349            | 0.156 | 0.00163884 | 0.156 | 298.54        | 0.114 | 1.0000168 | 0.039 | 1            | 3.54E-14               | 23  | SEP   | 2020 | 3    | 12  | 1      |  |
| 20F25154                                                                     | 1.1 %  | VS17-035 | Groundmass | Mustang Butte | FCT-NM (1C27-20) | 28.201           | 0.082 | Kuiper et al (2008) | 9.47349            | 0.156 | 0.00163884 | 0.156 | 298.54        | 0.114 | 1.0000168 | 0.039 | 1            | 3.54E-14               | 23  | SEP   | 2020 | 3    | 25  | 1      |  |
| 20F25155                                                                     | 1.3 %  | VS17-035 | Groundmass | Mustang Butte | FCT-NM (1C27-20) | 28.201           | 0.082 | Kuiper et al (2008) | 9.47349            | 0.156 | 0.00163884 | 0.156 | 298.54        | 0.114 | 1.0000168 | 0.039 | 1            | 3.54E-14               | 23  | SEP   | 2020 | 3    | 39  | 1      |  |
| 20F25157                                                                     | 1.5 %  | VS17-035 | Groundmass | Mustang Butte | FCT-NM (1C27-20) | 28.201           | 0.082 | Kuiper et al (2008) | 9.47349            | 0.156 | 0.00163884 | 0.156 | 298.54        | 0.114 | 1.0000168 | 0.039 | 1            | 3.54E-14               | 23  | SEP   | 2020 | 4    | 5   | 1      |  |
| 20F25158                                                                     | 1.8 %  | VS17-035 | Groundmass | Mustang Butte | FCT-NM (1C27-20) | 28.201           | 0.082 | Kuiper et al (2008) | 9.47349            | 0.156 | 0.00163884 | 0.156 | 298.54        | 0.114 | 1.0000168 | 0.039 | 1            | 3.54E-14               | 23  | SEP   | 2020 | 4    | 18  | 1      |  |
| 20F25159                                                                     | 2.2 %  | VS17-035 | Groundmass | Mustang Butte | FCT-NM (1C27-20) | 28.201           | 0.082 | Kuiper et al (2008) | 9.47349            | 0.156 | 0.00163884 | 0.156 | 298.54        | 0.114 | 1.0000168 | 0.039 | 1            | 3.54E-14               | 23  | SEP   | 2020 | 4    | 31  | 1      |  |
| 20F25161                                                                     | 2.6 %  | VS17-035 | Groundmass | Mustang Butte | FCT-NM (1C27-20) | 28.201           | 0.082 | Kuiper et al (2008) | 9.47349            | 0.156 | 0.00163884 | 0.156 | 298.54        | 0.114 | 1.0000168 | 0.039 | 1            | 3.54E-14               | 23  | SEP   | 2020 | 4    | 57  | 1      |  |
| 20F25162                                                                     | 3.1 %  | VS17-035 | Groundmass | Mustang Butte | FCT-NM (1C27-20) | 28.201           | 0.082 | Kuiper et al (2008) | 9.47349            | 0.156 | 0.00163884 | 0.156 | 298.54        | 0.114 | 1.0000168 | 0.039 | 1            | 3.54E-14               | 23  | SEP   | 2020 | 5    | 10  | 1      |  |
| 20F25163                                                                     | 3.6 %  | VS17-035 | Groundmass | Mustang Butte | FCT-NM (1C27-20) | 28.201           | 0.082 | Kuiper et al (2008) | 9.47349            | 0.156 | 0.00163884 | 0.156 | 298.54        | 0.114 | 1.0000168 | 0.039 | 1            | 3.54E-14               | 23  | SEP   | 2020 | 5    | 23  | 1      |  |
| 20F25165                                                                     | 4.1 %  | VS17-035 | Groundmass | Mustang Butte | FCT-NM (1C27-20) | 28.201           | 0.082 | Kuiper et al (2008) | 9.47349            | 0.156 | 0.00163884 | 0.156 | 298.54        | 0.114 | 1.0000168 | 0.039 | 1            | 3.54E-14               | 23  | SEP   | 2020 | 5    | 50  | 1      |  |
| 20F25166                                                                     | 4.7 %  | VS17-035 | Groundmass | Mustang Butte | FCT-NM (1C27-20) | 28.201           | 0.082 | Kuiper et al (2008) | 9.47349            | 0.156 | 0.00163884 | 0.156 | 298.54        | 0.114 | 1.0000168 | 0.039 | 1            | 3.54E-14               | 23  | SEP   | 2020 | 6    | 3   | 1      |  |
| 20F25167                                                                     | 5.3 %  | VS17-035 | Groundmass | Mustang Butte | FCT-NM (1C27-20) | 28.201           | 0.082 | Kuiper et al (2008) | 9.47349            | 0.156 | 0.00163884 | 0.156 | 298.54        | 0.114 | 1.0000168 | 0.039 | 1            | 3.54E-14               | 23  | SEP   | 2020 | 6    | 16  | 1      |  |
| 20F25169                                                                     | 6.0 %  | VS17-035 | Groundmass | Mustang Butte | FCT-NM (1C27-20) | 28.201           | 0.082 | Kuiper et al (2008) | 9.47349            | 0.156 | 0.00163884 | 0.156 | 298.54        | 0.114 | 1.0000168 | 0.039 | 1            | 3.54E-14               | 23  | SEP   | 2020 | 6    | 42  | 1      |  |
| 20F25170                                                                     | 6.8 %  | VS17-035 | Groundmass | Mustang Butte | FCT-NM (1C27-20) | 28.201           | 0.082 | Kuiper et al (2008) | 9.47349            | 0.156 | 0.00163884 | 0.156 | 298.54        | 0.114 | 1.0000168 | 0.039 | 1            | 3.54E-14               | 23  | SEP   | 2020 | 6    | 55  | 1      |  |
| 20F25171                                                                     | 7.5 %  | VS17-035 | Groundmass | Mustang Butte | FCT-NM (1C27-20) | 28.201           | 0.082 | Kuiper et al (2008) | 9.47349            | 0.156 | 0.00163884 | 0.156 | 298.54        | 0.114 | 1.0000168 | 0.039 | 1            | 3.54E-14               | 23  | SEP   | 2020 | 7    | 8   | 1      |  |
| 20F25173                                                                     | 8.3 %  | VS17-035 | Groundmass | Mustang Butte | FCT-NM (1C27-20) | 28.201           | 0.082 | Kuiper et al (2008) | 9.47349            | 0.156 | 0.00163884 | 0.156 | 298.54        | 0.114 | 1.0000168 | 0.039 | 1            | 3.54E-14               | 23  | SEP   | 2020 | 7    | 34  | 1      |  |
| 20F25174                                                                     | 9.1 %  | VS17-035 | Groundmass | Mustang Butte | FCT-NM (1C27-20) | 28.201           | 0.082 | Kuiper et al (2008) | 9.47349            | 0.156 | 0.00163884 | 0.156 | 298.54        | 0.114 | 1.0000168 | 0.039 | 1            | 3.54E-14               | 23  | SEP   | 2020 | 7    | 47  | 1      |  |
| 20F25175                                                                     | 10.1 % | VS17-035 | Groundmass | Mustang Butte | FCT-NM (1C27-20) | 28.201           | 0.082 | Kuiper et al (2008) | 9.47349            | 0.156 | 0.00163884 | 0.156 | 298.54        | 0.114 | 1.0000168 | 0.039 | 1            | 3.54E-14               | 23  | SEP   | 2020 | 8    | 0   | 1      |  |
| 20F25177                                                                     | 11.2 % | VS17-035 | Groundmass | Mustang Butte | FCT-NM (1C27-20) | 28.201           | 0.082 | Kuiper et al (2008) | 9.47349            | 0.156 | 0.00163884 | 0.156 | 298.54        | 0.114 | 1.0000168 | 0.039 | 1            | 3.54E-14               | 23  | SEP   | 2020 | 8    | 27  | 1      |  |
| 20F25178                                                                     | 12.4 % | VS17-035 | Groundmass | Mustang Butte | FCT-NM (1C27-20) | 28.201           | 0.082 | Kuiper et al (2008) | 9.47349            | 0.156 | 0.00163884 | 0.156 | 298.54        | 0.114 | 1.0000168 | 0.039 | 1            | 3.54E-14               | 23  | SEP   | 2020 | 8    | 40  | 1      |  |
| 20F25179                                                                     | 13.6 % | VS17-035 | Groundmass | Mustang Butte | FCT-NM (1C27-20) | 28.201           | 0.082 | Kuiper et al (2008) | 9.47349            | 0.156 | 0.00163884 | 0.156 | 298.54        | 0.114 | 1.0000168 | 0.039 | 1            | 3.54E-14               | 23  | SEP   | 2020 | 8    | 53  | 1      |  |
| 20F25181                                                                     | 14.9 % | VS17-035 | Groundmass | Mustang Butte | FCT-NM (1C27-20) | 28.201           | 0.082 | Kuiper et al (2008) | 9.47349            | 0.156 | 0.00163884 | 0.156 | 298.54        | 0.114 | 1.0000168 | 0.039 | 1            | 3.54E-14               | 23  | SEP   | 2020 | 9    | 19  | 1      |  |
| 20F25182                                                                     | 16.2 % | VS17-035 | Groundmass | Mustang Butte | FCT-NM (1C27-20) | 28.201           | 0.082 | Kuiper et al (2008) | 9.47349            | 0.156 | 0.00163884 | 0.156 | 298.54        | 0.114 | 1.0000168 | 0.039 | 1            | 3.54E-14               | 23  | SEP   | 2020 | 9    | 32  | 1      |  |
| 20F25183                                                                     | 17.6 % | VS17-035 | Groundmass | Mustang Butte | FCT-NM (1C27-20) | 28.201           | 0.082 | Kuiper et al (2008) | 9.47349            | 0.156 | 0.00163884 | 0.156 | 298.54        | 0.114 | 1.0000168 | 0.039 | 1            | 3.54E-14               | 23  | SEP   | 2020 | 9    | 45  | 1      |  |
| 20F25185                                                                     | 19.0 % | VS17-035 | Groundmass | Mustang Butte | FCT-NM (1C27-20) | 28.201           | 0.082 | Kuiper et al (2008) | 9.47349            | 0.156 | 0.00163884 | 0.156 | 298.54        | 0.114 | 1.0000168 | 0.039 | 1            | 3.54E-14               | 23  | SEP   | 2020 | 10   | 11  | 1      |  |
| 20F25186                                                                     | 20.5 % | VS17-035 | Groundmass | Mustang Butte | FCT-NM (1C27-20) | 28.201           | 0.082 | Kuiper et al (2008) | 9.47349            | 0.156 | 0.00163884 | 0.156 | 298.54        | 0.114 | 1.0000168 | 0.039 | 1            | 3.54E-14               | 23  | SEP   | 2020 | 10   | 25  | 1      |  |
| 20F25188                                                                     | 22.3 % | VS17-035 | Groundmass | Mustang Butte | FCT-NM (1C27-20) | 28.201           | 0.082 | Kuiper et al (2008) | 9.47349            | 0.156 | 0.00163884 | 0.156 | 298.54        | 0.114 | 1.0000168 | 0.039 | 1            | 3.54E-14               | 23  | SEP   | 2020 | 10   | 51  | 1      |  |

| OSU Argon Geochronology Lab<br>CEOAS Oregon State University, Corvallis, USA |       |                                      |       |       |    |          |       |       |   |          |      |         |      |          |      |          |      |           |      |     |   |           |   |     |   |           |   |     |   |          |   |     |   |          |   |     |   |           |   |     |   |      |   |     |   |      |   |     |   |       |   |     |   |   |   |   |   |   |   |   |   |   |   |   |   |   |   |   |   |   |   |   |   |   |   |   |   |   |   |   |   |   |   |   |   |   |   |   |   |   |   |   |   |   |   |   |   |   |   |   |   |   |   |   |   |   |   |   |   |   |   |   |   |   |   |   |   |   |   |   |   |   |   |   |   |   |   |   |   |   |   |   |   |   |   |   |   |   |   |   |   |   |   |   |   |   |   |   |   |   |   |   |   |   |   |   |   |   |   |   |   |   |   |   |   |   |   |   |   |   |   |   |   |   |   |   |   |   |   |   |   |   |   |   |   |   |   |   |   |   |   |   |   |   |   |   |   |   |   |   |   |   |   |   |   |   |   |   |   |   |   |   |   |   |   |   |   |   |   |   |   |   |   |   |   |   |   |   |   |   |   |   |   |   |   |   |   |   |   |   |   |   |   |   |   |   |   |   |   |   |   |   |   |   |   |   |   |   |   |   |   |   |   |   |   |   |   |   |   |   |   |   |   |   |   |   |   |   |   |   |   |   |   |   |   |   |   |   |   |   |   |   |   |   |   |   |   |   |   |   |   |   |   |   |   |   |   |   |   |   |   |   |   |   |   |   |   |   |   |   |   |   |   |   |   |   |   |   |   |   |   |   |   |   |   |   |   |   |   |   |   |   |   |   |   |   |   |   |   |   |   |   |   |   |   |   |   |   |   |   |   |   |   |   |   |   |   |   |   |   |   |   |   |   |   |   |   |   |   |   |   |   |   |   |   |   |   |   |   |   |   |   |   |   |   |   |   |   |   |   |   |   |   |   |   |   |   |   |   |   |   |   |   |   |   |   |   |   |   |   |   |   |   |   |   |   |   |   |   |   |   |   |   |   |   |   |   |   |   |   |   |   |   |   |   |   |   |   |   |   |   |   |   |   |   |   |   |   |   |   |   |   |   |   |   |   |   |   |   |   |   |   |   |   |   |   |   |   |   |   |   |   |   |   |   |   |   |   |   |   |   |   |   |   |   |   |   |   |   |   |   |   |   |   |   |   |   |   |   |   |   |   |   |   |   |   |   |   |   |   |   |   |   |   |   |   |   |   |   |   |   |   |   |   |   |   |   |   |   |   |   |   |   |   |   |   |   |   |   |   |   |   |   |   |   |   |   |   |   |   |   |   |   |   |   |   |   |   |   |   |   |   |   |   |   |   |   |   |   |   |   |   |   |   |   |   |   |   |   |   |   |   |   |   |   |   |   |   |   |   |   |   |   |   |   |   |   |   |   |   |   |   |   |   |   |   |   |   |   |   |   |   |   |   |   |   |   |   |   |   |   |   |   |   |   |   |   |   |   |   |   |   |   |   |   |   |   |   |   |   |   |   |   |   |   |   |   |   |   |   |   |   |   |   |   |   |   |   |   |   |   |   |   |   |   |   |   |   |   |   |   |   |   |   |   |   |   |   |   |   |   |   |   |   |   |   |   |   |   |   |   |   |   |   |   |   |   |   |   |   |   |   |   |   |   |   |   |   |   |   |   |   |   |   |   |   |   |   |   |   |   |   |   |   |   |   |   |   |   |   |   |   |   |   |   |   |   |   |   |   |   |   |   |   |   |   |   |   |   |   |   |   |   |   |   |   |   |   |   |   |   |   |   |   |   |   |   |   |   |   |   |   |   |   |   |   |   |   |   |   |   |   |   |   |   |   |   |   |   |   |   |   |   |   |   |   |   |   |   |   |   |   |   |   |   |   |   |   |   |   |   |   |   |   |   |   |   |   |   |   |   |   |   |   |   |   |   |   |   |   |   |   |   |   |   |   |   |   |   |   |   |   |   |   |   |   |   |   |   |   |   |   |   |   |   |   |   |   |   |   |   |   |   |   |   |   |   |   |   |   |   |   |   |   |   |   |   |   |   |   |   |   |   |   |   |   |   |   |   |   |   |   |   |   |   |   |   |   |   |   |   |   |   |   |   |   |   |   |   |   |   |   |   |   |   |   |   |   |   |   |   |   |   |   |   |   |   |   |   |   |   |   |   |   |   |   |   |   |   |   |   |   |   |   |   |   |   |   |   |   |   |   |   |   |   |   |   |   |   |   |   |   |   |   |   |   |   |   |   |   |   |   |   |   |   |   |   |   |   |   |   |   |   |   |   |   |   |   |   |   |   |   |   |   |   |   |   |   |   |   |   |   |   |   |   |   |   |   |   |   |   |   |   |   |   |   |   |   |   |   |   |   |   |   |   |   |   |   |   |   |   |   |   |   |   |   |   |   |   |   |   |   |   |   |   |   |   |   |   |   |   |   |   |   |   |   |   |   |   |   |   |   |   |   |   |   |   |   |   |   |   |   |   |   |   |   |   |   |   |   |   |   |   |   |   |   |   |   |   |   |   |   |   |   |   |   |   |   |   |   |   |   |   |   |   |   |   |   |   |   |   |   |   |   |   |   |
|------------------------------------------------------------------------------|-------|--------------------------------------|-------|-------|----|----------|-------|-------|---|----------|------|---------|------|----------|------|----------|------|-----------|------|-----|---|-----------|---|-----|---|-----------|---|-----|---|----------|---|-----|---|----------|---|-----|---|-----------|---|-----|---|------|---|-----|---|------|---|-----|---|-------|---|-----|---|---|---|---|---|---|---|---|---|---|---|---|---|---|---|---|---|---|---|---|---|---|---|---|---|---|---|---|---|---|---|---|---|---|---|---|---|---|---|---|---|---|---|---|---|---|---|---|---|---|---|---|---|---|---|---|---|---|---|---|---|---|---|---|---|---|---|---|---|---|---|---|---|---|---|---|---|---|---|---|---|---|---|---|---|---|---|---|---|---|---|---|---|---|---|---|---|---|---|---|---|---|---|---|---|---|---|---|---|---|---|---|---|---|---|---|---|---|---|---|---|---|---|---|---|---|---|---|---|---|---|---|---|---|---|---|---|---|---|---|---|---|---|---|---|---|---|---|---|---|---|---|---|---|---|---|---|---|---|---|---|---|---|---|---|---|---|---|---|---|---|---|---|---|---|---|---|---|---|---|---|---|---|---|---|---|---|---|---|---|---|---|---|---|---|---|---|---|---|---|---|---|---|---|---|---|---|---|---|---|---|---|---|---|---|---|---|---|---|---|---|---|---|---|---|---|---|---|---|---|---|---|---|---|---|---|---|---|---|---|---|---|---|---|---|---|---|---|---|---|---|---|---|---|---|---|---|---|---|---|---|---|---|---|---|---|---|---|---|---|---|---|---|---|---|---|---|---|---|---|---|---|---|---|---|---|---|---|---|---|---|---|---|---|---|---|---|---|---|---|---|---|---|---|---|---|---|---|---|---|---|---|---|---|---|---|---|---|---|---|---|---|---|---|---|---|---|---|---|---|---|---|---|---|---|---|---|---|---|---|---|---|---|---|---|---|---|---|---|---|---|---|---|---|---|---|---|---|---|---|---|---|---|---|---|---|---|---|---|---|---|---|---|---|---|---|---|---|---|---|---|---|---|---|---|---|---|---|---|---|---|---|---|---|---|---|---|---|---|---|---|---|---|---|---|---|---|---|---|---|---|---|---|---|---|---|---|---|---|---|---|---|---|---|---|---|---|---|---|---|---|---|---|---|---|---|---|---|---|---|---|---|---|---|---|---|---|---|---|---|---|---|---|---|---|---|---|---|---|---|---|---|---|---|---|---|---|---|---|---|---|---|---|---|---|---|---|---|---|---|---|---|---|---|---|---|---|---|---|---|---|---|---|---|---|---|---|---|---|---|---|---|---|---|---|---|---|---|---|---|---|---|---|---|---|---|---|---|---|---|---|---|---|---|---|---|---|---|---|---|---|---|---|---|---|---|---|---|---|---|---|---|---|---|---|---|---|---|---|---|---|---|---|---|---|---|---|---|---|---|---|---|---|---|---|---|---|---|---|---|---|---|---|---|---|---|---|---|---|---|---|---|---|---|---|---|---|---|---|---|---|---|---|---|---|---|---|---|---|---|---|---|---|---|---|---|---|---|---|---|---|---|---|---|---|---|---|---|---|---|---|---|---|---|---|---|---|---|---|---|---|---|---|---|---|---|---|---|---|---|---|---|---|---|---|---|---|---|---|---|---|---|---|---|---|---|---|---|---|---|---|---|---|---|---|---|---|---|---|---|---|---|---|---|---|---|---|---|---|---|---|---|---|---|---|---|---|---|---|---|---|---|---|---|---|---|---|---|---|---|---|---|---|---|---|---|---|---|---|---|---|---|---|---|---|---|---|---|---|---|---|---|---|---|---|---|---|---|---|---|---|---|---|---|---|---|---|---|---|---|---|---|---|---|---|---|---|---|---|---|---|---|---|---|---|---|---|---|---|---|---|---|---|---|---|---|---|---|---|---|---|---|---|---|---|---|---|---|---|---|---|---|---|---|---|---|---|---|---|---|---|---|---|---|---|---|---|---|---|---|---|---|---|---|---|---|---|---|---|---|---|---|---|---|---|---|---|---|---|---|---|---|---|---|---|---|---|---|---|---|---|---|---|---|---|---|---|---|---|---|---|---|---|---|---|---|---|---|---|---|---|---|---|---|---|---|---|---|---|---|---|---|---|---|---|---|---|---|---|---|---|---|---|---|---|---|---|---|---|---|---|---|---|---|---|---|---|---|---|---|---|---|---|---|---|---|---|---|---|---|---|---|---|---|---|---|---|---|---|---|---|---|---|---|---|---|---|---|---|---|---|---|---|---|---|---|---|---|---|---|---|---|---|---|---|---|---|---|---|---|---|---|---|---|---|---|---|---|---|---|---|---|---|---|---|---|---|---|---|---|---|---|---|---|---|---|---|---|---|---|---|---|---|---|---|---|---|---|---|---|---|---|---|---|---|---|---|---|---|---|---|---|---|---|---|---|---|---|---|---|---|---|---|---|---|---|---|---|---|---|---|---|---|---|---|---|---|---|---|---|---|---|---|---|---|---|---|---|---|---|---|---|---|---|---|---|---|---|---|---|---|---|---|---|---|---|---|---|---|---|---|---|---|---|---|---|---|---|---|---|---|---|---|---|---|---|---|---|---|---|---|---|---|---|
| Irradiation<br>Constants                                                     |       | Argon Isotope Ratios and Percentages |       |       |    |          |       |       |   |          |      |         |      |          |      |          |      |           |      |     |   |           |   |     |   |           |   |     |   |          |   |     |   |          |   |     |   |           |   |     |   |      |   |     |   |      |   |     |   |       |   |     |   |   |   |   |   |   |   |   |   |   |   |   |   |   |   |   |   |   |   |   |   |   |   |   |   |   |   |   |   |   |   |   |   |   |   |   |   |   |   |   |   |   |   |   |   |   |   |   |   |   |   |   |   |   |   |   |   |   |   |   |   |   |   |   |   |   |   |   |   |   |   |   |   |   |   |   |   |   |   |   |   |   |   |   |   |   |   |   |   |   |   |   |   |   |   |   |   |   |   |   |   |   |   |   |   |   |   |   |   |   |   |   |   |   |   |   |   |   |   |   |   |   |   |   |   |   |   |   |   |   |   |   |   |   |   |   |   |   |   |   |   |   |   |   |   |   |   |   |   |   |   |   |   |   |   |   |   |   |   |   |   |   |   |   |   |   |   |   |   |   |   |   |   |   |   |   |   |   |   |   |   |   |   |   |   |   |   |   |   |   |   |   |   |   |   |   |   |   |   |   |   |   |   |   |   |   |   |   |   |   |   |   |   |   |   |   |   |   |   |   |   |   |   |   |   |   |   |   |   |   |   |   |   |   |   |   |   |   |   |   |   |   |   |   |   |   |   |   |   |   |   |   |   |   |   |   |   |   |   |   |   |   |   |   |   |   |   |   |   |   |   |   |   |   |   |   |   |   |   |   |   |   |   |   |   |   |   |   |   |   |   |   |   |   |   |   |   |   |   |   |   |   |   |   |   |   |   |   |   |   |   |   |   |   |   |   |   |   |   |   |   |   |   |   |   |   |   |   |   |   |   |   |   |   |   |   |   |   |   |   |   |   |   |   |   |   |   |   |   |   |   |   |   |   |   |   |   |   |   |   |   |   |   |   |   |   |   |   |   |   |   |   |   |   |   |   |   |   |   |   |   |   |   |   |   |   |   |   |   |   |   |   |   |   |   |   |   |   |   |   |   |   |   |   |   |   |   |   |   |   |   |   |   |   |   |   |   |   |   |   |   |   |   |   |   |   |   |   |   |   |   |   |   |   |   |   |   |   |   |   |   |   |   |   |   |   |   |   |   |   |   |   |   |   |   |   |   |   |   |   |   |   |   |   |   |   |   |   |   |   |   |   |   |   |   |   |   |   |   |   |   |   |   |   |   |   |   |   |   |   |   |   |   |   |   |   |   |   |   |   |   |   |   |   |   |   |   |   |   |   |   |   |   |   |   |   |   |   |   |   |   |   |   |   |   |   |   |   |   |   |   |   |   |   |   |   |   |   |   |   |   |   |   |   |   |   |   |   |   |   |   |   |   |   |   |   |   |   |   |   |   |   |   |   |   |   |   |   |   |   |   |   |   |   |   |   |   |   |   |   |   |   |   |   |   |   |   |   |   |   |   |   |   |   |   |   |   |   |   |   |   |   |   |   |   |   |   |   |   |   |   |   |   |   |   |   |   |   |   |   |   |   |   |   |   |   |   |   |   |   |   |   |   |   |   |   |   |   |   |   |   |   |   |   |   |   |   |   |   |   |   |   |   |   |   |   |   |   |   |   |   |   |   |   |   |   |   |   |   |   |   |   |   |   |   |   |   |   |   |   |   |   |   |   |   |   |   |   |   |   |   |   |   |   |   |   |   |   |   |   |   |   |   |   |   |   |   |   |   |   |   |   |   |   |   |   |   |   |   |   |   |   |   |   |   |   |   |   |   |   |   |   |   |   |   |   |   |   |   |   |   |   |   |   |   |   |   |   |   |   |   |   |   |   |   |   |   |   |   |   |   |   |   |   |   |   |   |   |   |   |   |   |   |   |   |   |   |   |   |   |   |   |   |   |   |   |   |   |   |   |   |   |   |   |   |   |   |   |   |   |   |   |   |   |   |   |   |   |   |   |   |   |   |   |   |   |   |   |   |   |   |   |   |   |   |   |   |   |   |   |   |   |   |   |   |   |   |   |   |   |   |   |   |   |   |   |   |   |   |   |   |   |   |   |   |   |   |   |   |   |   |   |   |   |   |   |   |   |   |   |   |   |   |   |   |   |   |   |   |   |   |   |   |   |   |   |   |   |   |   |   |   |   |   |   |   |   |   |   |   |   |   |   |   |   |   |   |   |   |   |   |   |   |   |   |   |   |   |   |   |   |   |   |   |   |   |   |   |   |   |   |   |   |   |   |   |   |   |   |   |   |   |   |   |   |   |   |   |   |   |   |   |   |   |   |   |   |   |   |   |   |   |   |   |   |   |   |   |   |   |   |   |   |   |   |   |   |   |   |   |   |   |   |   |   |   |   |   |   |   |   |   |   |   |   |   |   |   |   |   |   |   |   |   |   |   |   |   |   |   |   |   |   |   |   |   |   |   |   |   |   |   |   |   |   |   |   |   |   |   |   |   |   |   |   |   |   |   |   |   |   |   |   |   |   |   |   |   |   |   |   |   |   |   |   |   |   |   |   |   |   |   |   |   |   |   |   |   |   |   |   |   |   |   |
|                                                                              |       | 40/36(a)                             |       | %1σ   |    | 40/36(c) |       | %1σ   |   | 38/36(a) |      | %1σ     |      | 38/36(c) |      | %1σ      |      | 39/37(ca) |      | %1σ |   | 38/37(ca) |   | %1σ |   | 36/37(ca) |   | %1σ |   | 40/39(k) |   | %1σ |   | 38/39(k) |   | %1σ |   | 36/38(cl) |   | %1σ |   | K/Ca |   | %1σ |   | K/Cl |   | %1σ |   | Ca/Cl |   | %1σ |   |   |   |   |   |   |   |   |   |   |   |   |   |   |   |   |   |   |   |   |   |   |   |   |   |   |   |   |   |   |   |   |   |   |   |   |   |   |   |   |   |   |   |   |   |   |   |   |   |   |   |   |   |   |   |   |   |   |   |   |   |   |   |   |   |   |   |   |   |   |   |   |   |   |   |   |   |   |   |   |   |   |   |   |   |   |   |   |   |   |   |   |   |   |   |   |   |   |   |   |   |   |   |   |   |   |   |   |   |   |   |   |   |   |   |   |   |   |   |   |   |   |   |   |   |   |   |   |   |   |   |   |   |   |   |   |   |   |   |   |   |   |   |   |   |   |   |   |   |   |   |   |   |   |   |   |   |   |   |   |   |   |   |   |   |   |   |   |   |   |   |   |   |   |   |   |   |   |   |   |   |   |   |   |   |   |   |   |   |   |   |   |   |   |   |   |   |   |   |   |   |   |   |   |   |   |   |   |   |   |   |   |   |   |   |   |   |   |   |   |   |   |   |   |   |   |   |   |   |   |   |   |   |   |   |   |   |   |   |   |   |   |   |   |   |   |   |   |   |   |   |   |   |   |   |   |   |   |   |   |   |   |   |   |   |   |   |   |   |   |   |   |   |   |   |   |   |   |   |   |   |   |   |   |   |   |   |   |   |   |   |   |   |   |   |   |   |   |   |   |   |   |   |   |   |   |   |   |   |   |   |   |   |   |   |   |   |   |   |   |   |   |   |   |   |   |   |   |   |   |   |   |   |   |   |   |   |   |   |   |   |   |   |   |   |   |   |   |   |   |   |   |   |   |   |   |   |   |   |   |   |   |   |   |   |   |   |   |   |   |   |   |   |   |   |   |   |   |   |   |   |   |   |   |   |   |   |   |   |   |   |   |   |   |   |   |   |   |   |   |   |   |   |   |   |   |   |   |   |   |   |   |   |   |   |   |   |   |   |   |   |   |   |   |   |   |   |   |   |   |   |   |   |   |   |   |   |   |   |   |   |   |   |   |   |   |   |   |   |   |   |   |   |   |   |   |   |   |   |   |   |   |   |   |   |   |   |   |   |   |   |   |   |   |   |   |   |   |   |   |   |   |   |   |   |   |   |   |   |   |   |   |   |   |   |   |   |   |   |   |   |   |   |   |   |   |   |   |   |   |   |   |   |   |   |   |   |   |   |   |   |   |   |   |   |   |   |   |   |   |   |   |   |   |   |   |   |   |   |   |   |   |   |   |   |   |   |   |   |   |   |   |   |   |   |   |   |   |   |   |   |   |   |   |   |   |   |   |   |   |   |   |   |   |   |   |   |   |   |   |   |   |   |   |   |   |   |   |   |   |   |   |   |   |   |   |   |   |   |   |   |   |   |   |   |   |   |   |   |   |   |   |   |   |   |   |   |   |   |   |   |   |   |   |   |   |   |   |   |   |   |   |   |   |   |   |   |   |   |   |   |   |   |   |   |   |   |   |   |   |   |   |   |   |   |   |   |   |   |   |   |   |   |   |   |   |   |   |   |   |   |   |   |   |   |   |   |   |   |   |   |   |   |   |   |   |   |   |   |   |   |   |   |   |   |   |   |   |   |   |   |   |   |   |   |   |   |   |   |   |   |   |   |   |   |   |   |   |   |   |   |   |   |   |   |   |   |   |   |   |   |   |   |   |   |   |   |   |   |   |   |   |   |   |   |   |   |   |   |   |   |   |   |   |   |   |   |   |   |   |   |   |   |   |   |   |   |   |   |   |   |   |   |   |   |   |   |   |   |   |   |   |   |   |   |   |   |   |   |   |   |   |   |   |   |   |   |   |   |   |   |   |   |   |   |   |   |   |   |   |   |   |   |   |   |   |   |   |   |   |   |   |   |   |   |   |   |   |   |   |   |   |   |   |   |   |   |   |   |   |   |   |   |   |   |   |   |   |   |   |   |   |   |   |   |   |   |   |   |   |   |   |   |   |   |   |   |   |   |   |   |   |   |   |   |   |   |   |   |   |   |   |   |   |   |   |   |   |   |   |   |   |   |   |   |   |   |   |   |   |   |   |   |   |   |   |   |   |   |   |   |   |   |   |   |   |   |   |   |   |   |   |   |   |   |   |   |   |   |   |   |   |   |   |   |   |   |   |   |   |   |   |   |   |   |   |   |   |   |   |   |   |   |   |   |   |   |   |   |   |   |   |   |   |   |   |   |   |   |   |   |   |   |   |   |   |   |   |   |   |   |   |   |   |   |   |   |   |   |   |   |   |   |   |   |   |   |   |   |   |   |   |   |   |   |   |   |   |   |   |   |   |   |   |   |   |   |   |   |   |   |   |   |   |   |   |   |   |   |   |   |   |   |   |   |   |   |   |   |   |   |   |   |   |   |   |   |   |   |   |   |   |   |   |   |   |   |   |   |   |   |   |   |   |   |   |   |   |   |   |   |   |   |   |
| 20F25145                                                                     | 0.3 % | 294.53                               | 0.225 | 0.018 | 35 | 0.1885   | 0.159 | 1.493 | 3 | 0.000643 | 0.92 | 0.00018 | 9.63 | 0.00027  | 0.17 | 0.000607 | 9.65 | 0.012077  | 0.09 | 0   | 0 | 0.43      | 0 | 0   | 0 | 0         | 0 | 0   | 0 | 0.43     | 0 | 0   | 0 | 0        | 0 | 0   | 0 | 0         | 0 | 0   | 0 | 0    | 0 | 0   | 0 | 0    | 0 | 0   | 0 | 0     | 0 | 0   | 0 | 0 | 0 | 0 | 0 | 0 | 0 | 0 | 0 | 0 | 0 | 0 | 0 | 0 | 0 | 0 | 0 | 0 | 0 | 0 | 0 | 0 | 0 | 0 | 0 | 0 | 0 | 0 | 0 | 0 | 0 | 0 | 0 | 0 | 0 | 0 | 0 | 0 | 0 | 0 | 0 | 0 | 0 | 0 | 0 | 0 | 0 | 0 | 0 | 0 | 0 | 0 | 0 | 0 | 0 | 0 | 0 | 0 | 0 | 0 | 0 | 0 | 0 | 0 | 0 | 0 | 0 | 0 | 0 | 0 | 0 | 0 | 0 | 0 | 0 | 0 | 0 | 0 | 0 | 0 | 0 | 0 | 0 | 0 | 0 | 0 | 0 | 0 | 0 | 0 | 0 | 0 | 0 | 0 | 0 | 0 | 0 | 0 | 0 | 0 | 0 | 0 | 0 | 0 | 0 | 0 | 0 | 0 | 0 | 0 | 0 | 0 | 0 | 0 | 0 | 0 | 0 | 0 | 0 | 0 | 0 | 0 | 0 | 0 | 0 | 0 | 0 | 0 | 0 | 0 | 0 | 0 | 0 | 0 | 0 | 0 | 0 | 0 | 0 | 0 | 0 | 0 | 0 | 0 | 0 | 0 | 0 | 0 | 0 | 0 | 0 | 0 | 0 | 0 | 0 | 0 | 0 | 0 | 0 | 0 | 0 | 0 | 0 | 0 | 0 | 0 | 0 | 0 | 0 | 0 | 0 | 0 | 0 | 0 | 0 | 0 | 0 | 0 | 0 | 0 | 0 | 0 | 0 | 0 | 0 | 0 | 0 | 0 | 0 | 0 | 0 | 0 | 0 | 0 | 0 | 0 | 0 | 0 | 0 | 0 | 0 | 0 | 0 | 0 | 0 | 0 | 0 | 0 | 0 | 0 | 0 | 0 | 0 | 0 | 0 | 0 | 0 | 0 | 0 | 0 | 0 | 0 | 0 | 0 | 0 | 0 | 0 | 0 | 0 | 0 | 0 | 0 | 0 | 0 | 0 | 0 | 0 | 0 | 0 | 0 | 0 | 0 | 0 | 0 | 0 | 0 | 0 | 0 | 0 | 0 | 0 | 0 | 0 | 0 | 0 | 0 | 0 | 0 | 0 | 0 | 0 | 0 | 0 | 0 | 0 | 0 | 0 | 0 | 0 | 0 | 0 | 0 | 0 | 0 | 0 | 0 | 0 | 0 | 0 | 0 | 0 | 0 | 0 | 0 | 0 | 0 | 0 | 0 | 0 | 0 | 0 | 0 | 0 | 0 | 0 | 0 | 0 | 0 | 0 | 0 | 0 | 0 | 0 | 0 | 0 | 0 | 0 | 0 | 0 | 0 | 0 | 0 | 0 | 0 | 0 | 0 | 0 | 0 | 0 | 0 | 0 | 0 | 0 | 0 | 0 | 0 | 0 | 0 | 0 | 0 | 0 | 0 | 0 | 0 | 0 | 0 | 0 | 0 | 0 | 0 | 0 | 0 | 0 | 0 | 0 | 0 | 0 | 0 | 0 | 0 | 0 | 0 | 0 | 0 | 0 | 0 | 0 | 0 | 0 | 0 | 0 | 0 | 0 | 0 | 0 | 0 | 0 | 0 | 0 | 0 | 0 | 0 | 0 | 0 | 0 | 0 | 0 | 0 | 0 | 0 | 0 | 0 | 0 | 0 | 0 | 0 | 0 | 0 | 0 | 0 | 0 | 0 | 0 | 0 | 0 | 0 | 0 | 0 | 0 | 0 | 0 | 0 | 0 | 0 | 0 | 0 | 0 | 0 | 0 | 0 | 0 | 0 | 0 | 0 | 0 | 0 | 0 | 0 | 0 | 0 | 0 | 0 | 0 | 0 | 0 | 0 | 0 | 0 | 0 | 0 | 0 | 0 | 0 | 0 | 0 | 0 | 0 | 0 | 0 | 0 | 0 | 0 | 0 | 0 | 0 | 0 | 0 | 0 | 0 | 0 | 0 | 0 | 0 | 0 | 0 | 0 | 0 | 0 | 0 | 0 | 0 | 0 | 0 | 0 | 0 | 0 | 0 | 0 | 0 | 0 | 0 | 0 | 0 | 0 | 0 | 0 | 0 | 0 | 0 | 0 | 0 | 0 | 0 | 0 | 0 | 0 | 0 | 0 | 0 | 0 | 0 | 0 | 0 | 0 | 0 | 0 | 0 | 0 | 0 | 0 | 0 | 0 | 0 | 0 | 0 | 0 | 0 | 0 | 0 | 0 | 0 | 0 | 0 | 0 | 0 | 0 | 0 | 0 | 0 | 0 | 0 | 0 | 0 | 0 | 0 | 0 | 0 | 0 | 0 | 0 | 0 | 0 | 0 | 0 | 0 | 0 | 0 | 0 | 0 | 0 | 0 | 0 | 0 | 0 | 0 | 0 | 0 | 0 | 0 | 0 | 0 | 0 | 0 | 0 | 0 | 0 | 0 | 0 | 0 | 0 | 0 | 0 | 0 | 0 | 0 | 0 | 0 | 0 | 0 | 0 | 0 | 0 | 0 | 0 | 0 | 0 | 0 | 0 | 0 | 0 | 0 | 0 | 0 | 0 | 0 | 0 | 0 | 0 | 0 | 0 | 0 | 0 | 0 | 0 | 0 | 0 | 0 | 0 | 0 | 0 | 0 | 0 | 0 | 0 | 0 | 0 | 0 | 0 | 0 | 0 | 0 | 0 | 0 | 0 | 0 | 0 | 0 | 0 | 0 | 0 | 0 | 0 | 0 | 0 | 0 | 0 | 0 | 0 | 0 | 0 | 0 | 0 | 0 | 0 | 0 | 0 | 0 | 0 | 0 | 0 | 0 | 0 | 0 | 0 | 0 | 0 | 0 | 0 | 0 | 0 | 0 | 0 | 0 | 0 | 0 | 0 | 0 | 0 | 0 | 0 | 0 | 0 | 0 | 0 | 0 | 0 | 0 | 0 | 0 | 0 | 0 | 0 | 0 | 0 | 0 | 0 | 0 | 0 | 0 | 0 | 0 | 0 | 0 | 0 | 0 | 0 | 0 | 0 | 0 | 0 | 0 | 0 | 0 | 0 | 0 | 0 | 0 | 0 | 0 | 0 | 0 | 0 | 0 | 0 | 0 | 0 | 0 | 0 | 0 | 0 | 0 | 0 | 0 | 0 | 0 | 0 | 0 | 0 | 0 | 0 | 0 | 0 | 0 | 0 | 0 | 0 | 0 | 0 | 0 | 0 | 0 | 0 | 0 | 0 | 0 | 0 | 0 | 0 | 0 | 0 | 0 | 0 | 0 | 0 | 0 | 0 | 0 | 0 | 0 | 0 | 0 | 0 | 0 | 0 | 0 | 0 | 0 | 0 | 0 | 0 | 0 | 0 | 0 | 0 | 0 | 0 | 0 | 0 | 0 | 0 | 0 | 0 | 0 | 0 | 0 | 0 | 0 | 0 | 0 | 0 | 0 | 0 | 0 | 0 | 0 | 0 | 0 | 0 | 0 | 0 | 0 | 0 | 0 | 0 | 0 | 0 | 0 | 0 | 0 | 0 | 0 | 0 | 0 | 0 | 0 | 0 | 0 | 0 | 0 | 0 | 0 | 0 | 0 | 0 | 0 | 0 | 0 | 0 | 0 | 0 | 0 | 0 | 0 | 0 | 0 | 0 | 0 | 0 | 0 | 0 | 0 | 0 | 0 | 0 | 0 | 0 | 0 | 0 | 0 | 0 | 0 | 0 | 0 | 0 | 0 | 0 | 0 | 0 | 0 | 0 | 0 | 0 | 0 | 0 | 0 | 0 | 0 | 0 | 0 | 0 | 0 | 0 | 0 | 0 | 0 | 0 | 0 | 0 | 0 | 0 | 0 | 0 | 0 | 0 | 0 | 0 | 0 | 0 | 0 | 0 | 0 | 0 | 0 | 0 | 0 | 0 | 0 | 0 | 0 | 0 | 0 | 0 | 0 | 0 | 0 | 0 | 0 | 0 | 0 | 0 | 0 | 0 | 0 | 0 | 0 | 0 | 0 | 0 | 0 | 0 | 0 | 0 | 0 | 0 | 0 | 0 | 0 | 0 | 0 | 0 | 0 | 0 | 0 | 0 | 0 | 0 | 0 | 0 | 0 | 0 | 0 | 0 | 0 | 0 | 0 | 0 | 0 | 0 | 0 | 0 | 0 | 0 | 0 | 0 | 0 | 0 | 0 | 0 | 0 | 0 | 0 | 0 | 0 | 0 | 0 | 0 | 0 | 0 | 0 | 0 | 0 | 0 | 0 | 0 | 0 | 0 | 0 | 0 | 0 | 0 | 0 | 0 | 0 | 0 | 0 | 0 | 0 | 0 | 0 | 0 | 0 | 0 | 0 | 0 | 0 | 0 | 0 | 0 | 0 | 0 | 0 | 0 | 0 | 0 | 0 | 0 | 0 | 0 | 0 | 0 | 0 | 0 | 0 | 0 | 0 | 0 | 0 | 0 | 0 | 0 | 0 | 0 | 0 | 0 | 0 | 0 | 0 | 0 | 0 | 0 | 0 | 0 | 0 | 0 | 0 | 0 | 0 | 0 | 0 | 0 | 0 | 0 | 0 | 0 | 0 | 0 | 0 | 0 | 0 | 0 | 0 | 0 | 0 | 0 | 0 | 0 | 0 | 0 | 0 | 0 | 0 | 0 | 0 | 0 | 0 | 0 | 0 | 0 | 0 | 0 | 0 | 0 | 0 | 0 | 0 | 0 | 0 | 0 | 0 | 0 | 0 | 0 | 0 | 0 |

20F25141.AGE >>> VS17-035 >>> OREGON | SWENTON (18-58) PROJECT

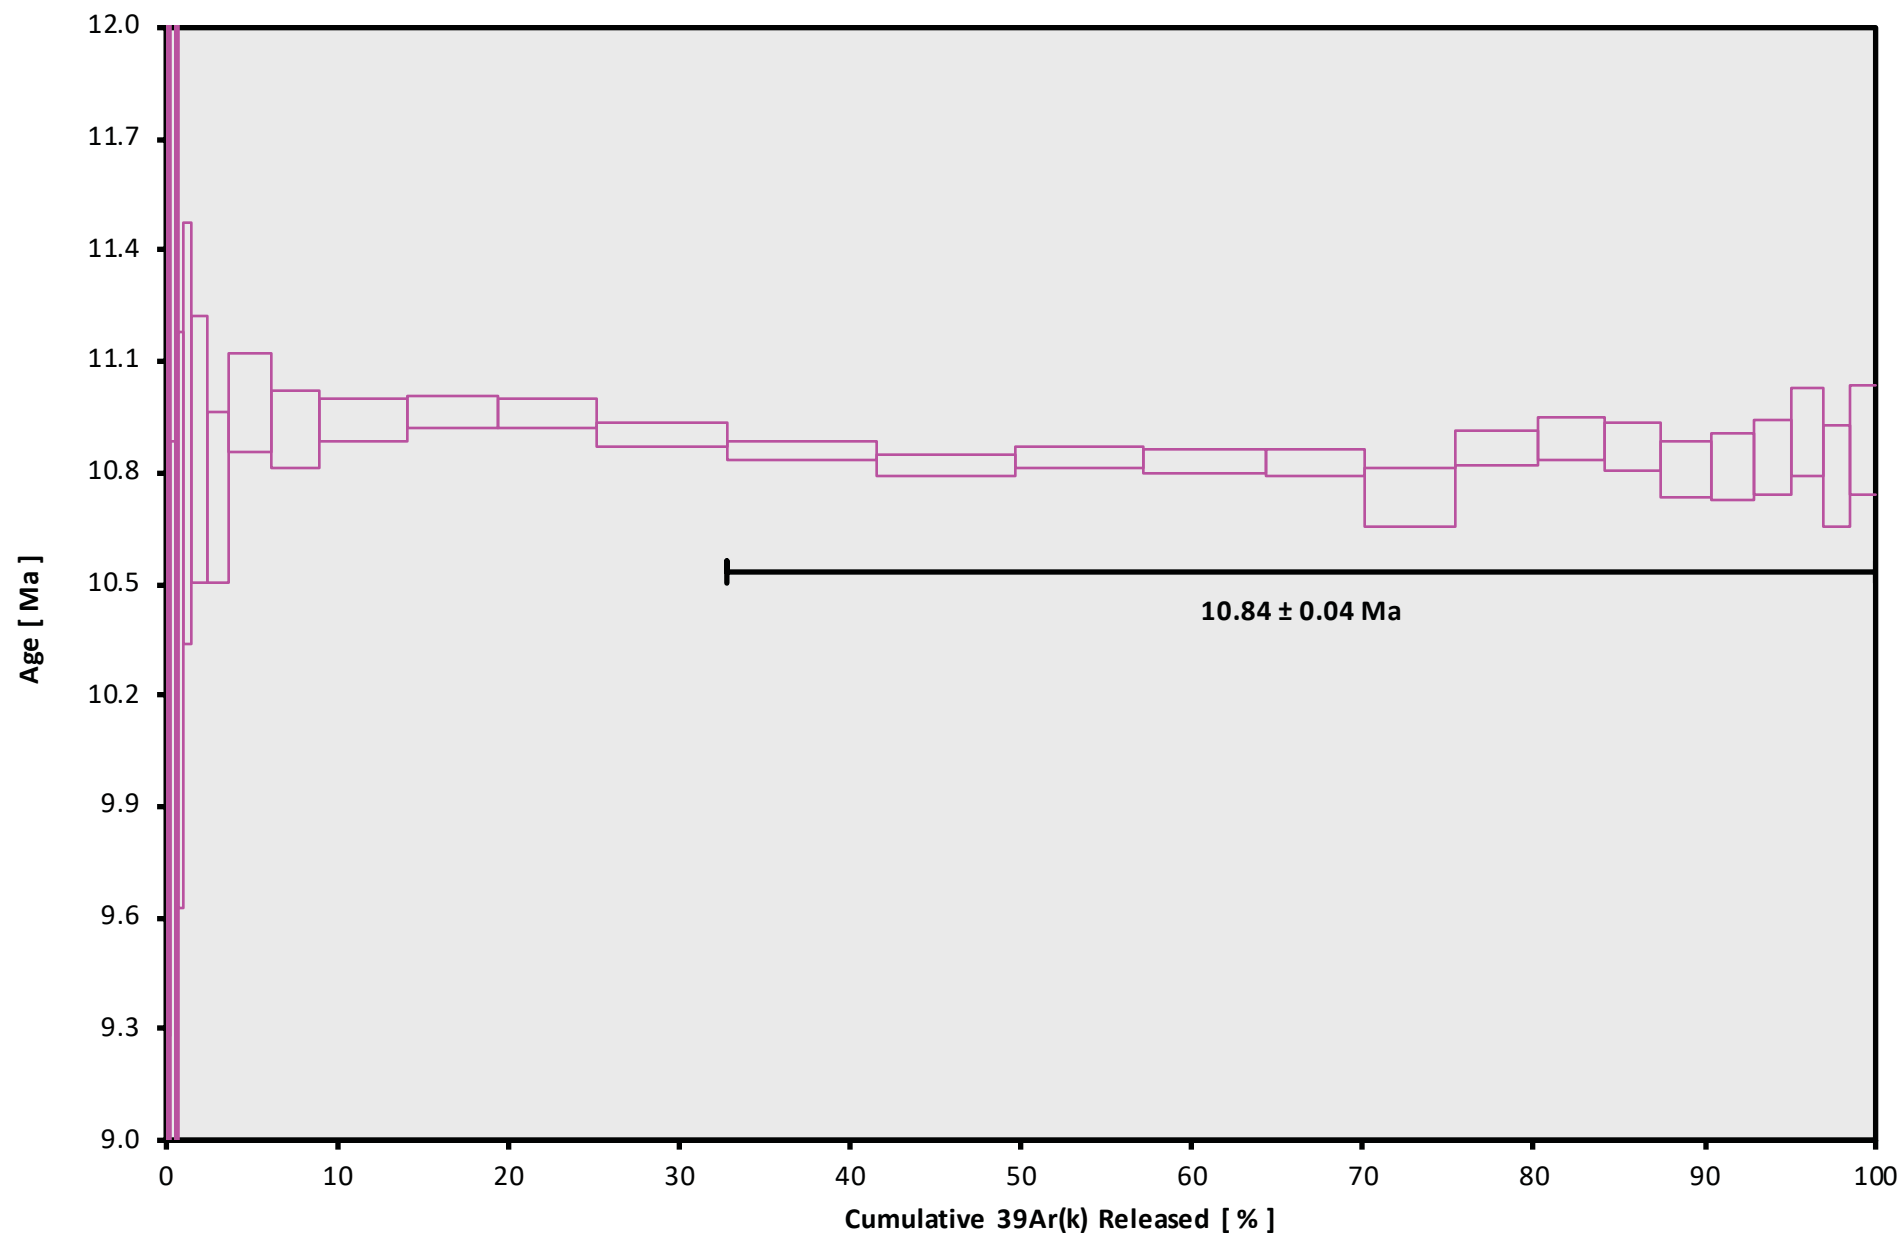

Ar-Ages in Ma

WEIGHTED PLATEAU

$10.84 \pm 0.04$

TOTAL FUSION

$10.87 \pm 0.04$

NORMAL ISOCHRON

$10.85 \pm 0.04$

INVERSE ISOCHRON

$10.85 \pm 0.04$

MSWD (PROBABILITY)

1.52 (10%)

Sample Info

Groundmass

Mustang Butte

Dan Miggins

IRR = 20-OSU-01 (1C27-

## 20F25141.AGE >>> VS17-035 >>> OREGON | SWENTON (18-58) PROJECT

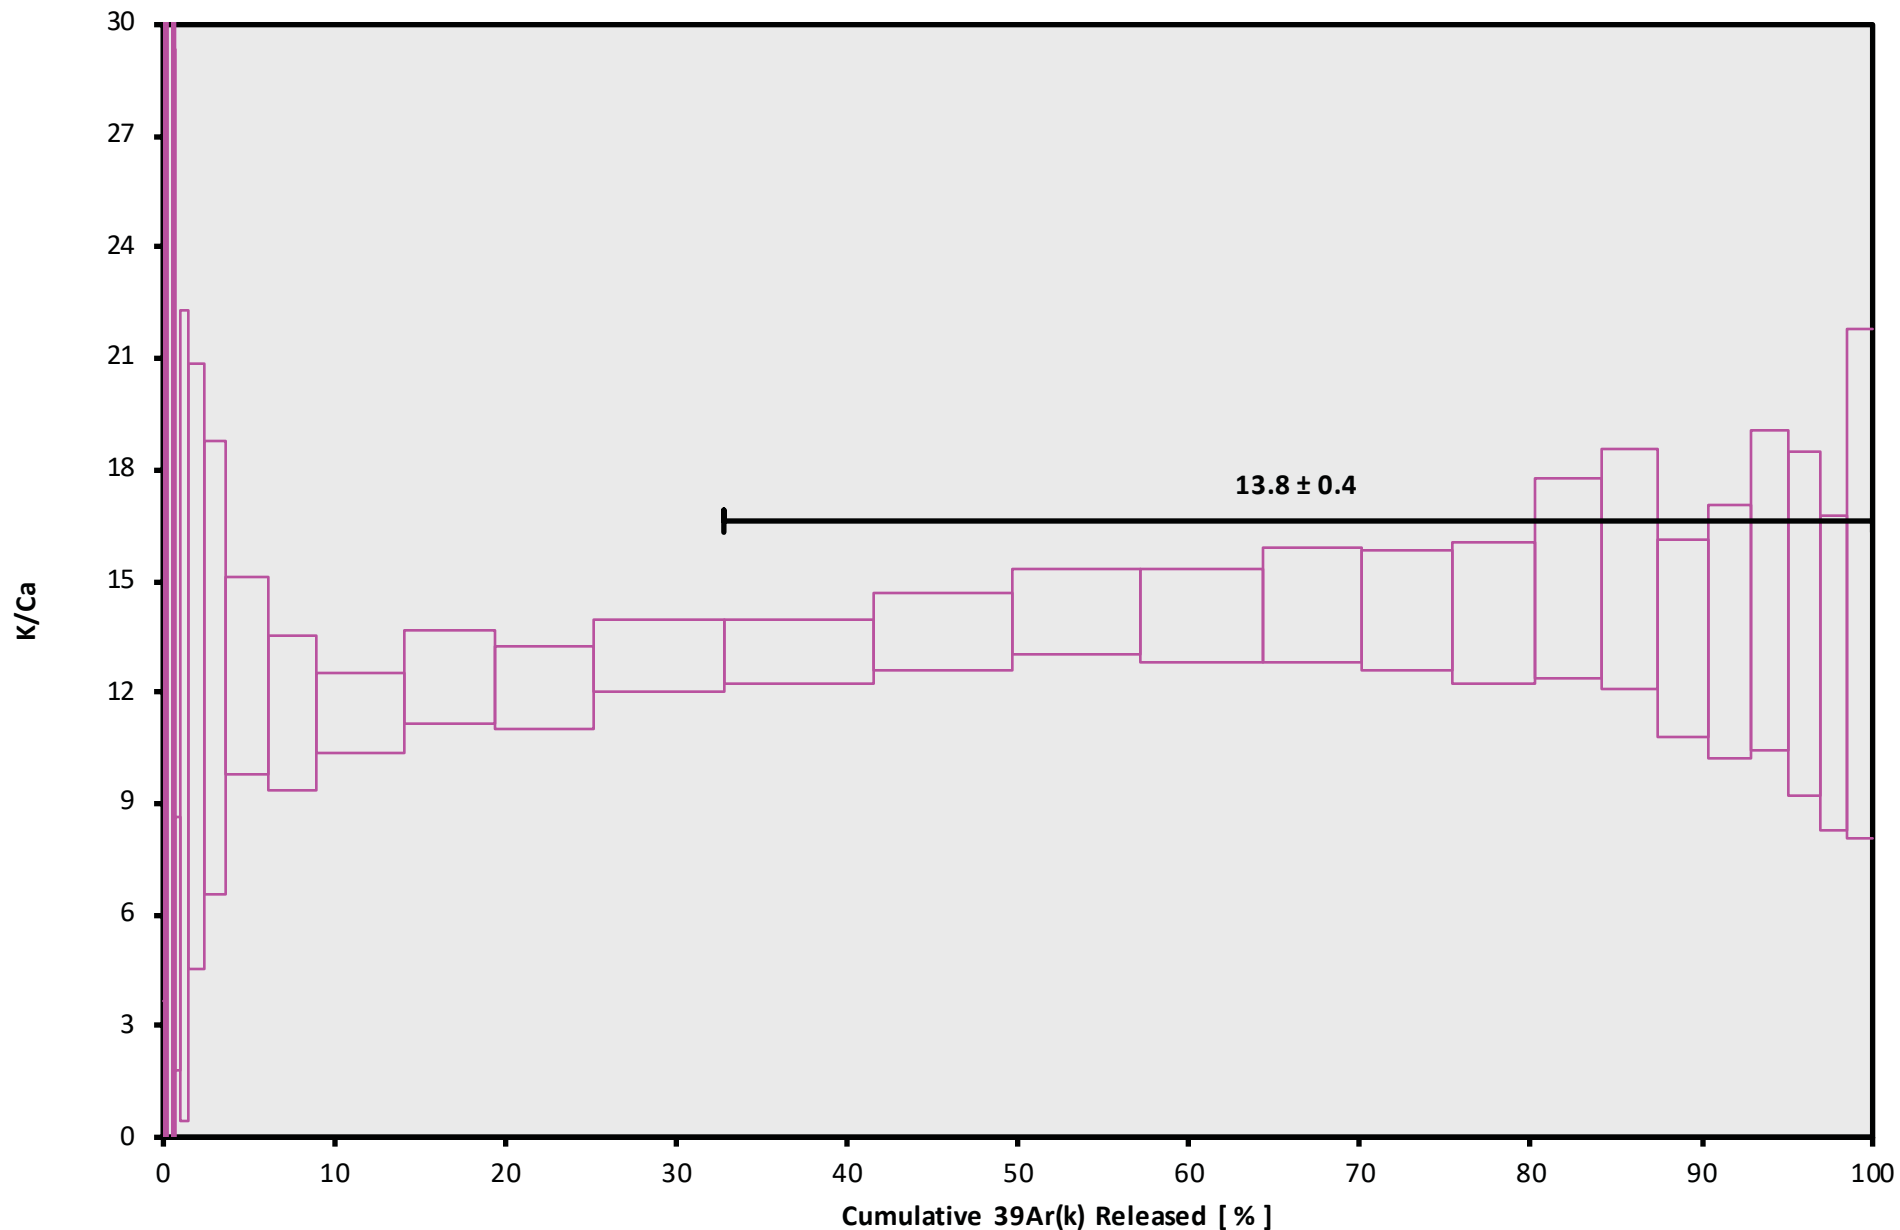

### Ar-Ages in Ma

#### WEIGHTED PLATEAU

$10.84 \pm 0.04$

#### TOTAL FUSION

$10.87 \pm 0.04$

#### NORMAL ISOCHRON

$10.85 \pm 0.04$

#### INVERSE ISOCHRON

$10.85 \pm 0.04$

### Sample Info

Groundmass

Mustang Butte

Dan Miggins

IRR = 20-OSU-01 (1C27-

20F25141.AGE >>> VS17-035 >>> OREGON | SWENTON (18-58) PROJECT

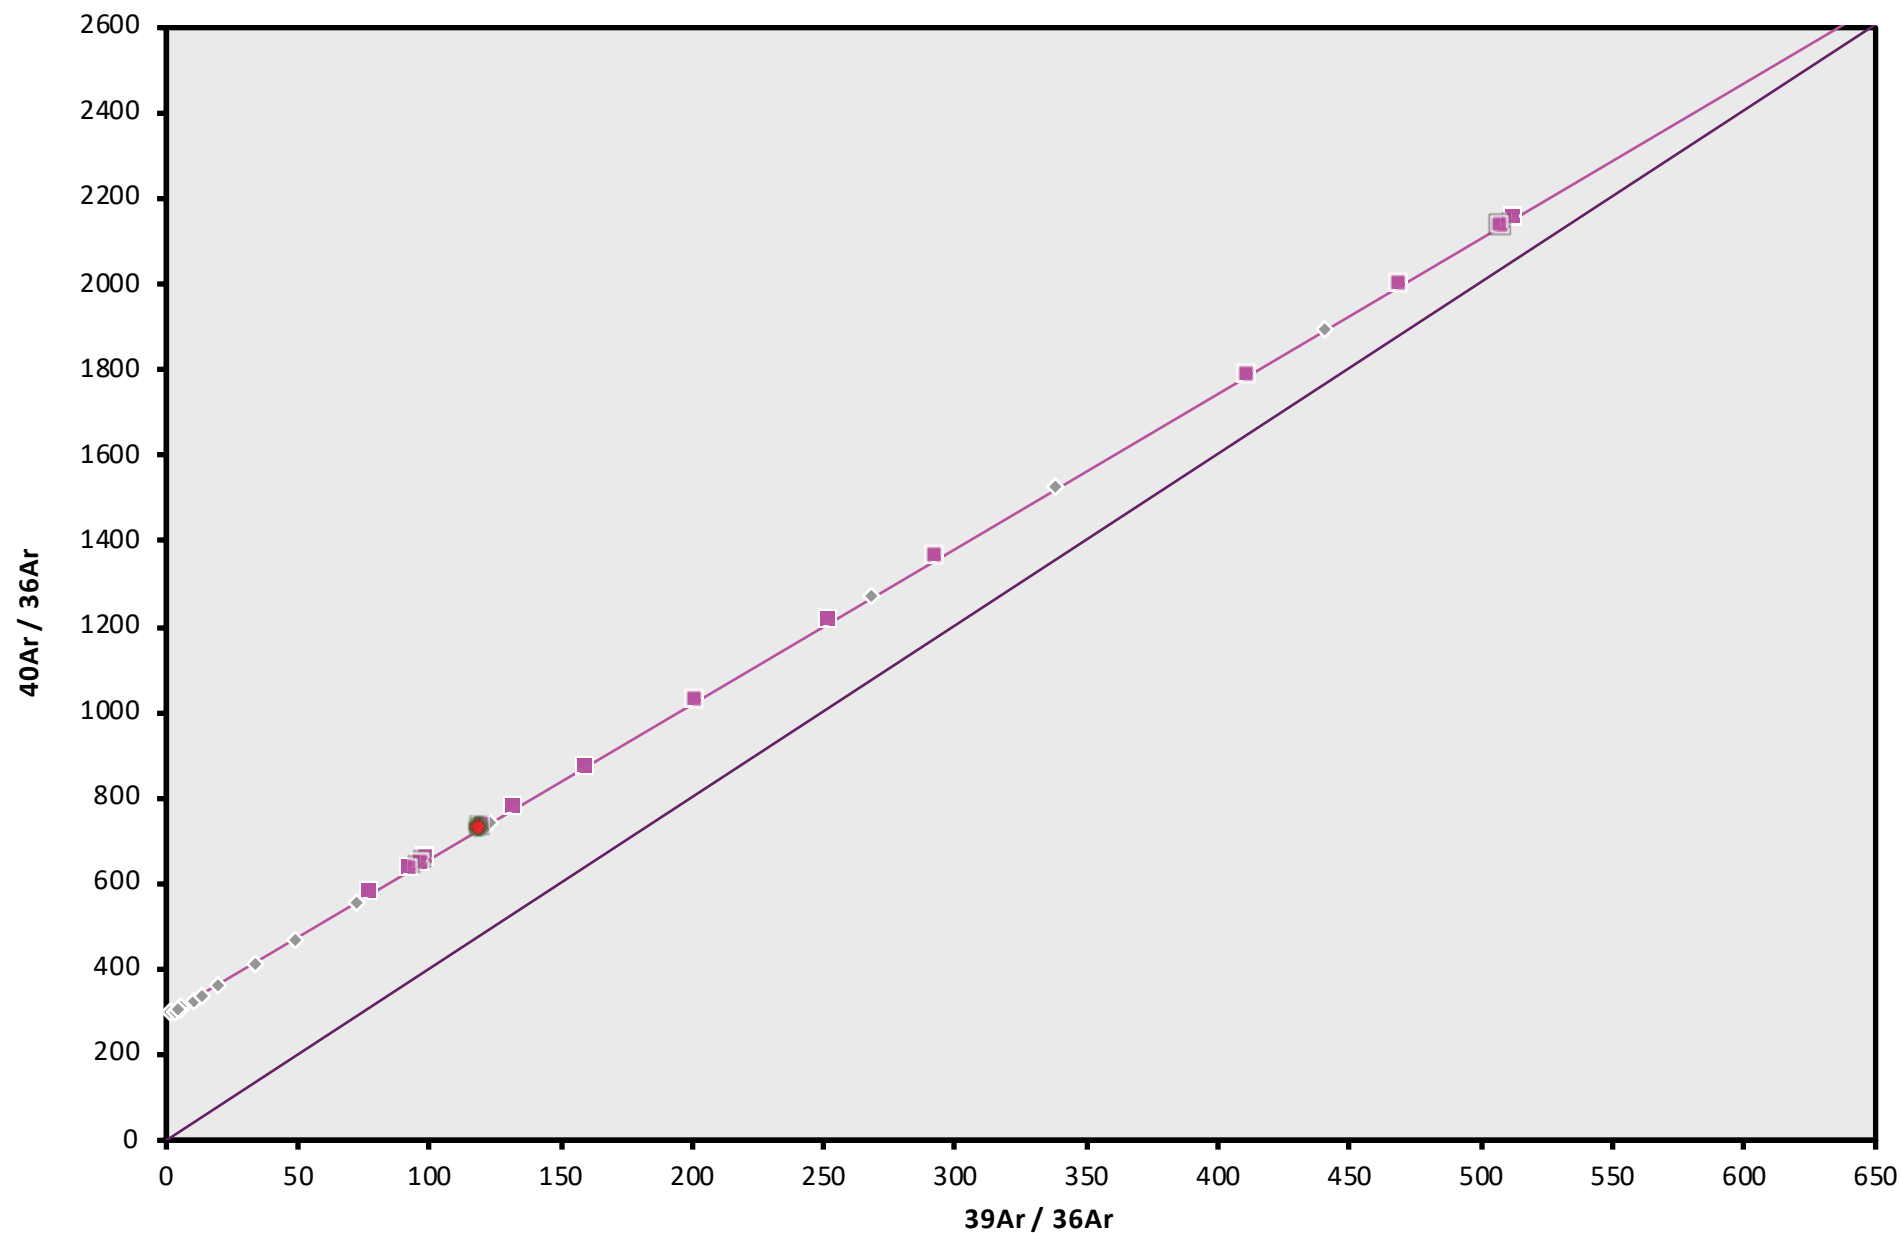

Ar-Ages in Ma

WEIGHTED PLATEAU

$10.84 \pm 0.04$

TOTAL FUSION

$10.87 \pm 0.04$

NORMAL ISOCHRON

$10.85 \pm 0.04$

INVERSE ISOCHRON

$10.85 \pm 0.04$

MSWD (PROBABILITY)

1.80 (4%)

$^{40}\text{Ar}/^{36}\text{Ar}$  INTERCEPT

Sample Info

Groundmass

Mustang Butte

Dan Miggins

IRR = 20-OSU-01 (1C27-

20F25141.AGE >>> VS17-035 >>> OREGON | SWENTON (18-58) PROJECT

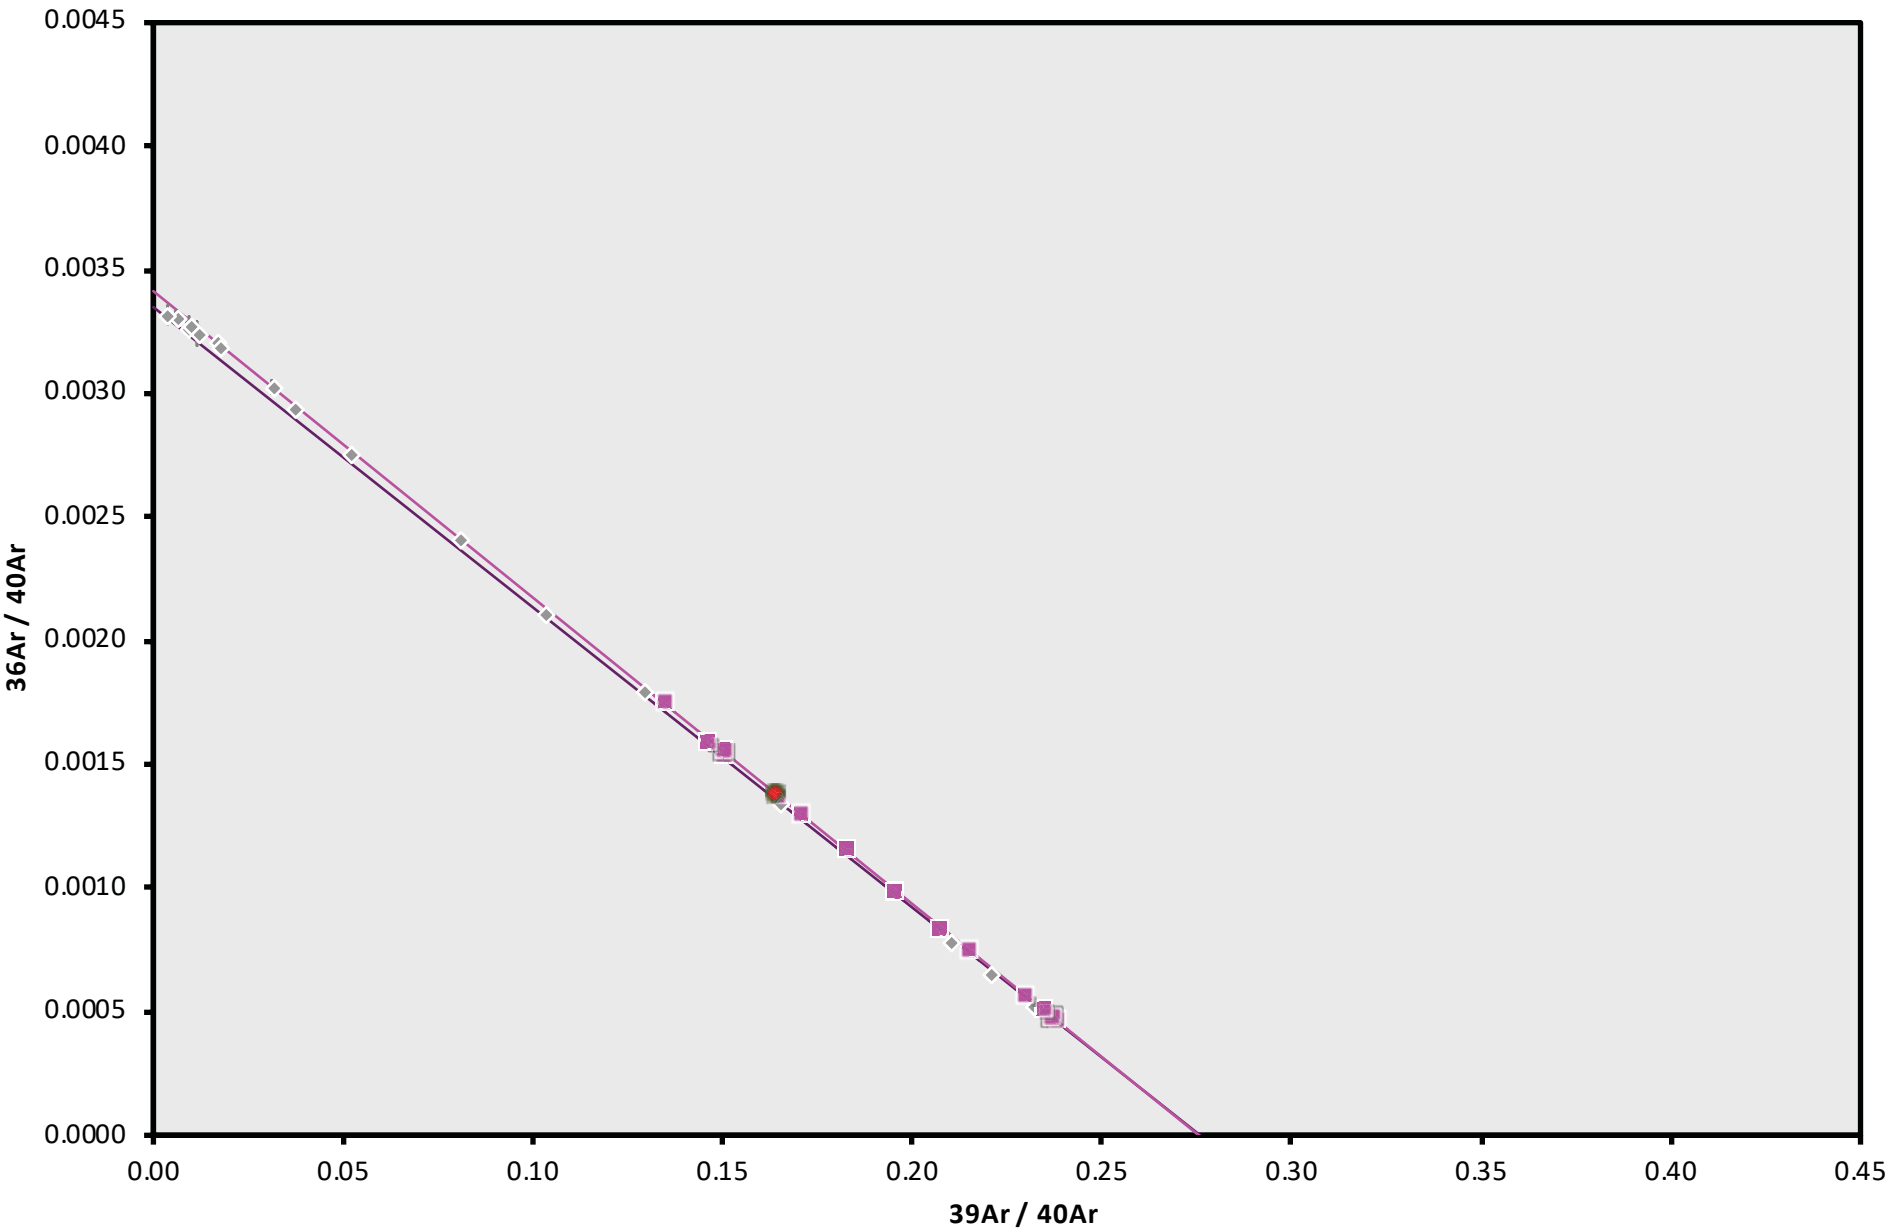

Ar-Ages in Ma

WEIGHTED PLATEAU

$10.84 \pm 0.04$

TOTAL FUSION

$10.87 \pm 0.04$

NORMAL ISOCHRON

$10.85 \pm 0.04$

INVERSE ISOCHRON

$10.85 \pm 0.04$

MSWD (PROBABILITY)

1.81 (4%)

SPREADING FACTOR

Sample Info

Groundmass

Mustang Butte

Dan Miggins

IRR = 20-OSU-01 (1C27-

| Relative Abundances |        |   | 36Ar<br>[fA] | %1σ    | 37Ar<br>[fA] | %1σ    | 38Ar<br>[fA] | %1σ   | 39Ar<br>[fA] | %1σ   | 40Ar<br>[fA] | %1σ   | 40(r)/39(k) ± 1σ | Age ± 1σ<br>(Ma) | 40Ar(r)<br>(%) | 39Ar(k)<br>(%) | K/Ca ± 1σ |
|---------------------|--------|---|--------------|--------|--------------|--------|--------------|-------|--------------|-------|--------------|-------|------------------|------------------|----------------|----------------|-----------|
| 20F04431            | 17.0 % | ✓ | 0.0003426    | 82.390 | 3.27928      | 5.099  | 1.300810     | 0.788 | 109.2713     | 0.043 | 410.560      | 0.008 | 3.75820 ±0.00182 | 10.94 ±0.01      | 100.02         | 1.76           | 14.3 ±0.7 |
| 20F04432            | 17.0 % | ✓ | 0.0007503    | 36.942 | 2.72977      | 5.915  | 1.405026     | 0.676 | 116.4163     | 0.043 | 437.168      | 0.008 | 3.75463 ±0.00179 | 10.93 ±0.01      | 99.98          | 1.88           | 18.3 ±1.1 |
| 20F04434            | 17.0 % | ✓ | 0.0004930    | 61.445 | 3.28525      | 4.621  | 1.442052     | 0.644 | 122.0645     | 0.042 | 458.572      | 0.008 | 3.75722 ±0.00178 | 10.94 ±0.01      | 100.01         | 1.97           | 16.0 ±0.7 |
| 20F04435            | 17.0 % | ✓ | 0.0827056    | 0.685  | 6.35378      | 2.579  | 4.308721     | 0.243 | 358.3429     | 0.041 | 1372.209     | 0.005 | 3.76128 ±0.00163 | 10.95 ±0.00      | 98.22          | 5.78           | 24.3 ±0.6 |
| 20F04437            | 17.0 % | ✓ | 0.0067676    | 5.811  | 4.08259      | 3.856  | 4.873069     | 0.214 | 405.9137     | 0.041 | 1526.383     | 0.004 | 3.75561 ±0.00157 | 10.94 ±0.00      | 99.87          | 6.55           | 42.8 ±1.6 |
| 20F04438            | 17.0 % | ✓ | 0.0042024    | 9.158  | 4.73900      | 3.463  | 2.540686     | 0.382 | 211.3105     | 0.042 | 794.873      | 0.005 | 3.75695 ±0.00168 | 10.94 ±0.00      | 99.87          | 3.41           | 19.2 ±0.7 |
| 20F04440            | 17.0 % | ✓ | 0.0844900    | 0.670  | 3.93080      | 4.045  | 3.846666     | 0.246 | 319.2776     | 0.041 | 1225.432     | 0.004 | 3.75955 ±0.00165 | 10.95 ±0.00      | 97.95          | 5.15           | 34.9 ±1.4 |
| 20F04441            | 17.0 % | ✓ | 0.0103142    | 3.776  | 3.66671      | 4.384  | 2.012419     | 0.475 | 167.2534     | 0.042 | 631.238      | 0.006 | 3.75694 ±0.00175 | 10.94 ±0.01      | 99.54          | 2.70           | 19.6 ±0.9 |
| 20F04443            | 17.0 % | ✓ | 0.0101695    | 3.841  | 6.61604      | 2.485  | 4.309139     | 0.240 | 360.2169     | 0.041 | 1355.474     | 0.004 | 3.75543 ±0.00159 | 10.94 ±0.00      | 99.80          | 5.81           | 23.4 ±0.6 |
| 20F04444            | 17.0 % | ✓ | 0.0021097    | 16.831 | 2.67609      | 5.698  | 1.451804     | 0.607 | 121.4938     | 0.042 | 457.266      | 0.008 | 3.75974 ±0.00185 | 10.95 ±0.01      | 99.89          | 1.96           | 19.5 ±1.1 |
| 20F04446            | 17.0 % | ✓ | 0.0018883    | 19.353 | 3.72248      | 3.907  | 2.779461     | 0.364 | 232.2951     | 0.042 | 871.700      | 0.005 | 3.75571 ±0.00164 | 10.94 ±0.00      | 100.08         | 3.75           | 26.8 ±1.0 |
| 20F04447            | 17.0 % | ✓ | 0.0014495    | 22.385 | 5.01878      | 2.837  | 2.233235     | 0.452 | 187.3131     | 0.042 | 702.114      | 0.006 | 3.75227 ±0.00166 | 10.93 ±0.00      | 100.10         | 3.02           | 16.0 ±0.5 |
| 20F04449            | 17.0 % | ✓ | 0.0082707    | 4.234  | 5.40170      | 2.975  | 2.502046     | 0.407 | 208.3284     | 0.042 | 783.095      | 0.005 | 3.74864 ±0.00165 | 10.92 ±0.00      | 99.72          | 3.36           | 16.6 ±0.5 |
| 20F04450            | 17.0 % | ✓ | 0.0031201    | 11.221 | 2.94104      | 5.425  | 2.739817     | 0.362 | 228.2316     | 0.042 | 857.671      | 0.006 | 3.75428 ±0.00164 | 10.93 ±0.00      | 99.90          | 3.68           | 33.4 ±1.8 |
| 20F04452            | 17.0 % | ✓ | 0.0372850    | 1.231  | 8.30250      | 1.800  | 4.420278     | 0.230 | 368.3283     | 0.041 | 1395.988     | 0.004 | 3.76111 ±0.00160 | 10.95 ±0.00      | 99.23          | 5.94           | 19.1 ±0.3 |
| 20F04453            | 17.0 % | ✓ | 0.0126340    | 3.065  | 5.51398      | 2.815  | 2.914037     | 0.322 | 242.4273     | 0.041 | 913.545      | 0.005 | 3.75405 ±0.00164 | 10.93 ±0.00      | 99.62          | 3.91           | 18.9 ±0.5 |
| 20F04455            | 17.0 % | ✓ | 0.0454645    | 1.038  | 4.23325      | 3.667  | 4.064944     | 0.239 | 336.6026     | 0.041 | 1278.188     | 0.004 | 3.75743 ±0.00161 | 10.94 ±0.00      | 98.95          | 5.43           | 34.2 ±1.3 |
| 20F04456            | 17.0 % | ✓ | 0.0087694    | 4.095  | 3.71893      | 4.121  | 2.038529     | 0.478 | 170.5727     | 0.042 | 641.484      | 0.006 | 3.74662 ±0.00171 | 10.91 ±0.00      | 99.62          | 2.75           | 19.7 ±0.8 |
| 20F04458            | 17.0 % | ✓ | 0.0015357    | 21.342 | 5.87182      | 2.619  | 2.473894     | 0.357 | 206.5853     | 0.042 | 776.010      | 0.006 | 3.75590 ±0.00165 | 10.94 ±0.00      | 99.99          | 3.33           | 15.1 ±0.4 |
| 20F04459            | 17.0 % | ✓ | 0.0037063    | 9.051  | 4.22948      | 3.814  | 1.663409     | 0.556 | 136.4749     | 0.042 | 513.805      | 0.008 | 3.75870 ±0.00178 | 10.95 ±0.01      | 99.84          | 2.20           | 13.9 ±0.5 |
| 20F04461            | 17.0 % | ✓ | 0.0126627    | 3.175  | 5.22100      | 3.048  | 2.887969     | 0.334 | 238.8849     | 0.042 | 900.561      | 0.005 | 3.75524 ±0.00165 | 10.94 ±0.00      | 99.61          | 3.86           | 19.7 ±0.6 |
| 20F04462            | 17.0 % | ✓ | 0.1307038    | 0.504  | 4.78733      | 3.175  | 2.614345     | 0.359 | 218.6635     | 0.041 | 859.200      | 0.005 | 3.75208 ±0.00182 | 10.93 ±0.01      | 95.49          | 3.53           | 19.6 ±0.6 |
| 20F04464            | 17.0 % | ✓ | 0.0016630    | 20.290 | 1.47388      | 10.907 | 1.654528     | 0.610 | 138.6093     | 0.042 | 520.949      | 0.007 | 3.75509 ±0.00176 | 10.94 ±0.01      | 99.91          | 2.24           | 40.4 ±4.4 |
| 20F04465            | 17.0 % | ✓ | 0.0037865    | 9.113  | 5.44492      | 3.098  | 2.098965     | 0.466 | 173.8847     | 0.042 | 652.126      | 0.006 | 3.74583 ±0.00170 | 10.91 ±0.00      | 99.88          | 2.81           | 13.7 ±0.4 |
| 20F04467            | 17.0 % | ✓ | 0.0563837    | 0.798  | 4.47122      | 3.450  | 2.583762     | 0.351 | 215.2645     | 0.042 | 824.939      | 0.005 | 3.75513 ±0.00170 | 10.94 ±0.00      | 97.99          | 3.47           | 20.7 ±0.7 |
| 20F04468            | 17.0 % | ✓ | 0.0719855    | 0.728  | 2.07571      | 7.447  | 0.973083     | 0.895 | 77.8941      | 0.044 | 314.218      | 0.010 | 3.75962 ±0.00266 | 10.95 ±0.01      | 93.20          | 1.26           | 16.1 ±1.2 |
| 20F04470            | 17.0 % | ✓ | 0.0021317    | 14.817 | 2.77339      | 5.319  | 1.490664     | 0.645 | 125.7095     | 0.043 | 472.039      | 0.007 | 3.75116 ±0.00179 | 10.92 ±0.01      | 99.90          | 2.03           | 19.5 ±1.0 |
| 20F04471            | 17.0 % | ✓ | 0.0009377    | 31.445 | 2.82940      | 5.362  | 1.384667     | 0.673 | 115.8962     | 0.043 | 435.567      | 0.008 | 3.76209 ±0.00181 | 10.96 ±0.01      | 100.10         | 1.87           | 17.6 ±0.9 |
| 20F04473            | 17.0 % | ✓ | 0.0022552    | 14.874 | 3.17489      | 4.922  | 1.284810     | 0.784 | 108.7293     | 0.043 | 408.280      | 0.008 | 3.75064 ±0.00189 | 10.92 ±0.01      | 99.88          | 1.75           | 14.7 ±0.7 |
| 20F04474            | 17.0 % | ✓ | 0.0020651    | 15.125 | 3.59793      | 4.602  | 2.081164     | 0.463 | 173.7046     | 0.042 | 651.105      | 0.006 | 3.74591 ±0.00168 | 10.91 ±0.00      | 99.93          | 2.80           | 20.8 ±1.0 |
| Σ                   |        |   | 0.6024925    | 0.361  | 126.16292    | 0.682  | 74.373999    | 0.071 | 6195.9609    | 0.008 | 23441.759    | 0.001 |                  |                  |                |                |           |

| Information on Analysis and Constants Used in Calculations |                                                               |
|------------------------------------------------------------|---------------------------------------------------------------|
| Project = <b>SWENTON (18-58)</b>                           | Age Equations = <b>Min et al. (2000)</b>                      |
| Sample = <b>VS17-043</b>                                   | Negative Intensities = <b>Allowed</b>                         |
| Material = <b>Sanidine</b>                                 | Collector Calibrations = <b>36Ar</b>                          |
| Location = <b>Saddle Butte</b>                             | Decay 40K = <b>5.463 ±0.107 E-10 1/a</b>                      |
| Region = <b>Eastern Oregon</b>                             | Decay 39Ar = <b>2.940 ±0.016 E-07 1/h</b>                     |
| Analyst = <b>Dan Miggins</b>                               | Decay 37Ar = <b>8.230 ±0.012 E-04 1/h</b>                     |
| Irradiation = <b>19-OSU-02 (2C34-19)</b>                   | Decay 36Cl = <b>2.257 ±0.015 E-06 1/a</b>                     |
| Position = <b>X: 0   Y: 0   Z/H: 42.59121 mm</b>           | Decay 40K(EC, β <sup>+</sup> ) = <b>0.580 ±0.014 E-10 1/a</b> |
| FCT-NM Age = <b>28.201 ±0.023 Ma</b>                       | Decay 40K(β <sup>-</sup> ) = <b>4.884 ±0.099 E-10 1/a</b>     |
| FCT-NM Reference = <b>Kuiper et al (2008)</b>              | Atmospheric 40/36(a) = <b>298.56 ±0.31</b>                    |
| FCT-NM 40Ar/39Ar Ratio = <b>9.72951 ±0.02364</b>           | Atmospheric 38/36(a) = <b>0.1885 ±0.0003</b>                  |
| FCT-NMJ-value = <b>0.00159571 ±0.00000388</b>              | Production 39/37(ca) = <b>0.0006425 ±0.0000059</b>            |
| Air Shot 40Ar/36Ar = <b>299.2170 ±0.3740</b>               | Production 38/37(ca) = <b>0.0001800 ±0.0000173</b>            |
| Air Shot MDF = <b>0.99945036 ±0.00040615 (LIN)</b>         | Production 36/37(ca) = <b>0.0002703 ±0.0000005</b>            |
| Experiment Type = <b>Total Fusion</b>                      | Production 40/39(k) = <b>0.000607 ±0.000059</b>               |
| Extraction Method = <b>Single Crystal Laser Heating</b>    | Production 38/39(k) = <b>0.012077 ±0.000011</b>               |
| Heating = <b>62 sec</b>                                    | Production 36/38(cl) = <b>262.80 ±1.71</b>                    |
| Isolation = <b>1.62 min</b>                                | Scaling Ratio K/Ca = <b>0.430</b>                             |
| Instrument = <b>ARGUS-VI-F</b>                             | Abundance Ratio 40K/K = <b>1.1700 ±0.0100 E-04</b>            |
| Preferred Age = <b>Ideogram Age</b>                        | Atomic Weight K = <b>39.0983 ±0.0001 g</b>                    |
| Age Classification = <b>Eruption Age</b>                   |                                                               |
| IGSN = <b>Undefined</b>                                    |                                                               |
| Rock Class = <b>Undefined</b>                              |                                                               |
| Lithology = <b>Undefined</b>                               |                                                               |
| Lat-Lon = <b>Undefined - Undefined</b>                     |                                                               |

| Results                         | 40(a)/36(a) ± 1σ    | 40(r)/39(k) ± 1σ        | Age ± 1σ<br>(Ma)                     | M\$WD               | 39Ar(k)<br>(%,n)                        | K/Ca ± 1σ |
|---------------------------------|---------------------|-------------------------|--------------------------------------|---------------------|-----------------------------------------|-----------|
| Age Plateau<br>Error Mean       |                     | 3.75503 ±0.00080 ±0.02% | 10.94 ±0.03 ±0.24%                   | 6.52 0% 1.26 2.5543 | 100.00 30                               | 18.3 ±0.8 |
|                                 |                     |                         | Full External Error Analytical Error |                     | 1σ Confidence Limit Error Magnification |           |
| Total Fusion Age                |                     | 3.75545 ±0.00033 ±0.01% | 10.94 ±0.03 ±0.24%                   |                     | 30                                      | 21.1 ±0.1 |
|                                 |                     |                         | Full External Error Analytical Error |                     |                                         |           |
| Normal Isochron<br>Error Chron  | 302.52 ±4.99 ±1.65% | 3.75485 ±0.00091 ±0.02% | 10.93 ±0.03 ±0.24%                   | 5.99 0% 1.27 2.4485 | 100.00 30                               |           |
|                                 |                     |                         | Full External Error Analytical Error |                     | 1σ Confidence Limit Error Magnification |           |
|                                 |                     |                         |                                      | 1 0.0000000001      | Number of Iterations Convergence        |           |
| Inverse Isochron<br>Error Chron | 303.47 ±5.14 ±1.69% | 3.75467 ±0.00090 ±0.02% | 10.93 ±0.03 ±0.24%                   | 6.54 0% 1.27 2.5575 | 100.00 30                               |           |
|                                 |                     |                         | Full External Error Analytical Error |                     | 1σ Confidence Limit Error Magnification |           |
|                                 |                     |                         |                                      | 2 0.0006935997      | Number of Iterations Convergence        |           |
|                                 |                     |                         |                                      | 7%                  | Spreading Factor                        |           |

| Incremental Heating |        |   | 36Ar(a)<br>[fA] | 37Ar(ca)<br>[fA] | 38Ar(cl)<br>[fA] | 39Ar(k)<br>[fA] | 40Ar(r)<br>[fA] | Age ± 1σ<br>(Ma) | 40Ar(r)<br>(%) | 39Ar(k)<br>(%) | K/Ca ± 1σ |
|---------------------|--------|---|-----------------|------------------|------------------|-----------------|-----------------|------------------|----------------|----------------|-----------|
| 20F04431            | 17.0 % | ✓ | 0.0005438       | 3.27928          | 0.0000000        | 109.2692        | 410.656         | 10.94 ±0.01      | 100.02         | 1.76           | 14.3 ±0.7 |
| 20F04432            | 17.0 % | ✓ | 0.0000124       | 2.72977          | 0.0000000        | 116.4145        | 437.093         | 10.93 ±0.01      | 99.98          | 1.88           | 18.3 ±1.1 |
| 20F04434            | 17.0 % | ✓ | 0.0003950       | 3.28525          | 0.0000000        | 122.0624        | 458.616         | 10.94 ±0.01      | 100.01         | 1.97           | 16.0 ±0.7 |
| 20F04435            | 17.0 % | ✓ | 0.0809882       | 6.35378          | 0.0000000        | 358.3388        | 1347.811        | 10.95 ±0.00      | 98.22          | 5.78           | 24.3 ±0.6 |
| 20F04437            | 17.0 % | ✓ | 0.0056641       | 4.08259          | 0.0000000        | 405.9111        | 1524.445        | 10.94 ±0.00      | 99.87          | 6.55           | 42.8 ±1.6 |
| 20F04438            | 17.0 % | ✓ | 0.0029214       | 4.73900          | 0.0000000        | 211.3075        | 793.873         | 10.94 ±0.00      | 99.87          | 3.41           | 19.2 ±0.7 |
| 20F04440            | 17.0 % | ✓ | 0.0834275       | 3.93080          | 0.0000000        | 319.2751        | 1200.331        | 10.95 ±0.00      | 97.95          | 5.15           | 34.9 ±1.4 |
| 20F04441            | 17.0 % | ✓ | 0.0093231       | 3.66671          | 0.0000000        | 167.2511        | 628.353         | 10.94 ±0.01      | 99.54          | 2.70           | 19.6 ±0.9 |
| 20F04443            | 17.0 % | ✓ | 0.0083812       | 6.61604          | 0.0000000        | 360.2126        | 1352.753        | 10.94 ±0.00      | 99.80          | 5.81           | 23.4 ±0.6 |
| 20F04444            | 17.0 % | ✓ | 0.0013864       | 2.67609          | 0.0000000        | 121.4921        | 456.778         | 10.95 ±0.01      | 99.89          | 1.96           | 19.5 ±1.1 |
| 20F04446            | 17.0 % | ✓ | 0.0028945       | 3.72248          | 0.0000000        | 232.2928        | 872.424         | 10.94 ±0.00      | 100.08         | 3.75           | 26.8 ±1.0 |
| 20F04447            | 17.0 % | ✓ | 0.0028061       | 5.01878          | 0.0000000        | 187.3099        | 702.838         | 10.93 ±0.00      | 100.10         | 3.02           | 16.0 ±0.5 |
| 20F04449            | 17.0 % | ✓ | 0.0068107       | 5.40170          | 0.0000000        | 208.3250        | 780.935         | 10.92 ±0.00      | 99.72          | 3.36           | 16.6 ±0.5 |
| 20F04450            | 17.0 % | ✓ | 0.0023252       | 2.94104          | 0.0000000        | 228.2297        | 856.838         | 10.93 ±0.00      | 99.90          | 3.68           | 33.4 ±1.8 |
| 20F04452            | 17.0 % | ✓ | 0.0350409       | 8.30250          | 0.0000000        | 368.3229        | 1385.303        | 10.95 ±0.00      | 99.23          | 5.94           | 19.1 ±0.3 |
| 20F04453            | 17.0 % | ✓ | 0.0111436       | 5.51398          | 0.0000000        | 242.4238        | 910.071         | 10.93 ±0.00      | 99.62          | 3.91           | 18.9 ±0.5 |
| 20F04455            | 17.0 % | ✓ | 0.0443202       | 4.23325          | 0.0000000        | 336.5999        | 1264.752        | 10.94 ±0.00      | 98.95          | 5.43           | 34.2 ±1.3 |
| 20F04456            | 17.0 % | ✓ | 0.0077642       | 3.71893          | 0.0000000        | 170.5703        | 639.063         | 10.91 ±0.00      | 99.62          | 2.75           | 19.7 ±0.8 |
| 20F04458            | 17.0 % | ✓ | 0.0000515       | 5.87182          | 0.0000000        | 206.5816        | 775.900         | 10.94 ±0.00      | 99.99          | 3.33           | 15.1 ±0.4 |
| 20F04459            | 17.0 % | ✓ | 0.0025597       | 4.22948          | 0.0139905        | 136.4722        | 512.958         | 10.95 ±0.01      | 99.84          | 2.20           | 13.9 ±0.5 |
| 20F04461            | 17.0 % | ✓ | 0.0112514       | 5.22100          | 0.0000000        | 238.8815        | 897.056         | 10.94 ±0.00      | 99.61          | 3.86           | 19.7 ±0.6 |
| 20F04462            | 17.0 % | ✓ | 0.1294097       | 4.78733          | 0.0000000        | 218.6605        | 820.431         | 10.93 ±0.01      | 95.49          | 3.53           | 19.6 ±0.6 |
| 20F04464            | 17.0 % | ✓ | 0.0012646       | 1.47388          | 0.0000000        | 138.6083        | 520.487         | 10.94 ±0.01      | 99.91          | 2.24           | 40.4 ±4.4 |
| 20F04465            | 17.0 % | ✓ | 0.0023147       | 5.44492          | 0.0000000        | 173.8812        | 651.329         | 10.91 ±0.00      | 99.88          | 2.81           | 13.7 ±0.4 |
| 20F04467            | 17.0 % | ✓ | 0.0551752       | 4.47122          | 0.0000000        | 215.2616        | 808.336         | 10.94 ±0.00      | 97.99          | 3.47           | 20.7 ±0.7 |
| 20F04468            | 17.0 % | ✓ | 0.0714199       | 2.07571          | 0.0185355        | 77.8928         | 292.847         | 10.95 ±0.01      | 93.20          | 1.26           | 16.1 ±1.2 |
| 20F04470            | 17.0 % | ✓ | 0.0013820       | 2.77339          | 0.0000000        | 125.7077        | 471.550         | 10.92 ±0.01      | 99.90          | 2.03           | 19.5 ±1.0 |
| 20F04471            | 17.0 % | ✓ | 0.0017025       | 2.82940          | 0.0000000        | 115.8943        | 436.005         | 10.96 ±0.01      | 100.10         | 1.87           | 17.6 ±0.9 |
| 20F04473            | 17.0 % | ✓ | 0.0013970       | 3.17489          | 0.0000000        | 108.7273        | 407.797         | 10.92 ±0.01      | 99.88          | 1.75           | 14.7 ±0.7 |
| 20F04474            | 17.0 % | ✓ | 0.0010926       | 3.59793          | 0.0000000        | 173.7023        | 650.674         | 10.91 ±0.00      | 99.93          | 2.80           | 20.8 ±1.0 |
| Σ                   |        |   | 0.5683828       | 126.16292        | 0.0325260        | 6195.8799       | 23268.301       |                  |                |                |           |

| Information on Analysis                                                                                                                                                                                                                                | Results                   | 40(r)/39(k) ± 1σ          | Age ± 1σ<br>(Ma)     | MSWD   | 39Ar(k)<br>(%,n)    | K/Ca ± 1σ  |
|--------------------------------------------------------------------------------------------------------------------------------------------------------------------------------------------------------------------------------------------------------|---------------------------|---------------------------|----------------------|--------|---------------------|------------|
| Project = SWENTON (18-58)<br>Sample = VS17-043<br>Material = Sanidine<br>Location = Saddle Butte<br>Region = Eastern Oregon<br>Analyst = Dan Miggins<br>Irradiation = 19-OSU-02 (2C34-19)<br>J = 0.00159571 ± 0.00000388<br>FCT-NM = 28.201 ± 0.023 Ma | Age Plateau<br>Error Mean | 3.75503 ± 0.00080 ± 0.02% | 10.94 ± 0.03 ± 0.24% | 6.52   | 100.00              | 18.3 ± 0.8 |
|                                                                                                                                                                                                                                                        |                           |                           |                      | 0%     | 30                  |            |
|                                                                                                                                                                                                                                                        |                           |                           |                      | 1.26   | 1σ Confidence Limit |            |
|                                                                                                                                                                                                                                                        | Total Fusion Age          | 3.75545 ± 0.00033 ± 0.01% | 10.94 ± 0.03 ± 0.24% | 2.5543 | Error Magnification |            |
|                                                                                                                                                                                                                                                        |                           |                           |                      |        | 30                  | 21.1 ± 0.1 |



| Normal Isochron |        |   | 39(k)/36(a) ± 1σ        | 40(a+r)/36(a) ± 1σ       | r.i.   |
|-----------------|--------|---|-------------------------|--------------------------|--------|
| 20F04431        | 17.0 % | ✓ | 200941.72 ±105636.36    | 754881.57 ±396845.98     | 1.0000 |
| 20F04432        | 17.0 % | ✓ | 9351455.82 #####        | 35111536.85 #####        | 1.0000 |
| 20F04434        | 17.0 % | ✓ | 308991.18 ±239093.94    | 1160649.96 ±898097.91    | 1.0000 |
| 20F04435        | 17.0 % | ✓ | 4424.58 ±31.12          | 16940.64 ±118.95         | 0.9983 |
| 20F04437        | 17.0 % | ✓ | 71663.54 ±5005.00       | 269439.10 ±18817.37      | 1.0000 |
| 20F04438        | 17.0 % | ✓ | 72329.71 ±9592.02       | 272037.98 ±36076.21      | 1.0000 |
| 20F04440        | 17.0 % | ✓ | 3826.98 ±26.10          | 14686.28 ±99.98          | 0.9982 |
| 20F04441        | 17.0 % | ✓ | 17939.38 ±754.08        | 67695.80 ±2845.43        | 0.9999 |
| 20F04443        | 17.0 % | ✓ | 42978.63 ±2016.05       | 161701.75 ±7584.84       | 1.0000 |
| 20F04444        | 17.0 % | ✓ | 87631.28 ±22595.29      | 329769.10 ±85029.22      | 1.0000 |
| 20F04446        | 17.0 % | ✓ | 80253.29 ±10190.91      | 301109.31 ±38235.95      | 1.0000 |
| 20F04447        | 17.0 % | ✓ | 66751.26 ±7772.78       | 250170.28 ±29130.64      | 1.0000 |
| 20F04449        | 17.0 % | ✓ | 30588.05 ±1584.86       | 114962.15 ±5956.35       | 1.0000 |
| 20F04450        | 17.0 % | ✓ | 98156.39 ±14891.98      | 368805.27 ±55953.78      | 1.0000 |
| 20F04452        | 17.0 % | ✓ | 10511.24 ±138.24        | 39832.49 ±523.60         | 0.9995 |
| 20F04453        | 17.0 % | ✓ | 21754.56 ±760.57        | 81966.24 ±2865.45        | 0.9999 |
| 20F04455        | 17.0 % | ✓ | 7594.72 ±81.22          | 28835.22 ±308.16         | 0.9993 |
| 20F04456        | 17.0 % | ✓ | 21968.76 ±1022.86       | 82607.23 ±3846.01        | 1.0000 |
| 20F04458        | 17.0 % | ✓ | 4014799.62 ±25778808.21 | 15078895.81 ±96820762.86 | 1.0000 |
| 20F04459        | 17.0 % | ✓ | 53314.65 ±7046.13       | 200692.47 ±26523.63      | 1.0000 |
| 20F04461        | 17.0 % | ✓ | 21231.18 ±763.04        | 80026.63 ±2875.93        | 0.9999 |
| 20F04462        | 17.0 % | ✓ | 1689.68 ±8.65           | 6638.35 ±33.88           | 0.9967 |
| 20F04464        | 17.0 % | ✓ | 109605.35 ±29486.55     | 411876.86 ±110804.95     | 1.0000 |
| 20F04465        | 17.0 % | ✓ | 75119.26 ±11295.99      | 281682.44 ±42357.57      | 1.0000 |
| 20F04467        | 17.0 % | ✓ | 3901.42 ±31.98          | 14948.92 ±122.39         | 0.9987 |
| 20F04468        | 17.0 % | ✓ | 1090.63 ±8.04           | 4398.92 ±32.37           | 0.9981 |
| 20F04470        | 17.0 % | ✓ | 90958.57 ±20953.32      | 341499.02 ±78667.96      | 1.0000 |
| 20F04471        | 17.0 % | ✓ | 68074.53 ±11903.72      | 255803.75 ±44730.47      | 1.0000 |
| 20F04473        | 17.0 % | ✓ | 77826.59 ±18834.22      | 292197.78 ±70712.44      | 1.0000 |
| 20F04474        | 17.0 % | ✓ | 158987.23 ±45915.43     | 595850.93 ±172081.28     | 1.0000 |

| Results         | 40(a)/36(a) ± 1σ      | 40(r)/39(k) ± 1σ     | Age ± 1σ (Ma)             | MSWD |
|-----------------|-----------------------|----------------------|---------------------------|------|
| Normal Isochron | 302.52 ±4.99          | 3.75485 ±0.00091     | 10.93 ±0.03               | 5.99 |
| Error Chron     | ±1.65%                | ±0.02%               | ±0.24%                    | 0%   |
|                 |                       |                      | Full External Error ±0.29 |      |
|                 |                       |                      | Analytical Error ±0.00    |      |
|                 |                       |                      |                           |      |
| Statistics      | 1σ Confidence Limit   | Convergence          | 0.000000000080            |      |
|                 | Error Magnification   | Number of Iterations | 1                         |      |
|                 | Number of Data Points | Calculated Line      | Weighted York-2           |      |

| Inverse Isochron |        |   | 39(k)/40(a+r) ± 1σ |            | 36(a)/40(a+r) ± 1σ |             | r.i.   |
|------------------|--------|---|--------------------|------------|--------------------|-------------|--------|
| 20F04431         | 17.0 % | ✓ | 0.2661897          | ±0.0001163 | 0.00000132         | ±0.00000070 | 0.0000 |
| 20F04432         | 17.0 % | ✓ | 0.2663357          | ±0.0001162 | 0.00000003         | ±0.00000064 | 0.0000 |
| 20F04434         | 17.0 % | ✓ | 0.2662225          | ±0.0001147 | 0.00000086         | ±0.00000067 | 0.0000 |
| 20F04435         | 17.0 % | ✓ | 0.2611816          | ±0.0001080 | 0.00005903         | ±0.00000041 | 0.0008 |
| 20F04437         | 17.0 % | ✓ | 0.2659730          | ±0.0001096 | 0.00000371         | ±0.00000026 | 0.0001 |
| 20F04438         | 17.0 % | ✓ | 0.2658809          | ±0.0001120 | 0.00000368         | ±0.00000049 | 0.0001 |
| 20F04440         | 17.0 % | ✓ | 0.2605819          | ±0.0001079 | 0.00006809         | ±0.00000046 | 0.0007 |
| 20F04441         | 17.0 % | ✓ | 0.2649999          | ±0.0001133 | 0.00001477         | ±0.00000062 | 0.0002 |
| 20F04443         | 17.0 % | ✓ | 0.2657895          | ±0.0001103 | 0.00000618         | ±0.00000029 | 0.0001 |
| 20F04444         | 17.0 % | ✓ | 0.2657353          | ±0.0001148 | 0.00000303         | ±0.00000078 | 0.0001 |
| 20F04446         | 17.0 % | ✓ | 0.2665254          | ±0.0001118 | 0.00000332         | ±0.00000042 | 0.0001 |
| 20F04447         | 17.0 % | ✓ | 0.2668233          | ±0.0001122 | 0.00000400         | ±0.00000047 | 0.0001 |
| 20F04449         | 17.0 % | ✓ | 0.2660706          | ±0.0001118 | 0.00000870         | ±0.00000045 | 0.0001 |
| 20F04450         | 17.0 % | ✓ | 0.2661469          | ±0.0001118 | 0.00000271         | ±0.00000041 | 0.0001 |
| 20F04452         | 17.0 % | ✓ | 0.2638862          | ±0.0001091 | 0.00002511         | ±0.00000033 | 0.0003 |
| 20F04453         | 17.0 % | ✓ | 0.2654088          | ±0.0001110 | 0.00001220         | ±0.00000043 | 0.0002 |
| 20F04455         | 17.0 % | ✓ | 0.2633835          | ±0.0001090 | 0.00003468         | ±0.00000037 | 0.0005 |
| 20F04456         | 17.0 % | ✓ | 0.2659424          | ±0.0001131 | 0.00001211         | ±0.00000056 | 0.0002 |
| 20F04458         | 17.0 % | ✓ | 0.2662529          | ±0.0001121 | 0.00000007         | ±0.00000043 | 0.0000 |
| 20F04459         | 17.0 % | ✓ | 0.2656535          | ±0.0001146 | 0.00000498         | ±0.00000066 | 0.0001 |
| 20F04461         | 17.0 % | ✓ | 0.2653014          | ±0.0001111 | 0.00001250         | ±0.00000045 | 0.0002 |
| 20F04462         | 17.0 % | ✓ | 0.2545323          | ±0.0001064 | 0.00015064         | ±0.00000077 | 0.0012 |
| 20F04464         | 17.0 % | ✓ | 0.2661119          | ±0.0001138 | 0.00000243         | ±0.00000065 | 0.0000 |
| 20F04465         | 17.0 % | ✓ | 0.2666807          | ±0.0001135 | 0.00000355         | ±0.00000053 | 0.0001 |
| 20F04467         | 17.0 % | ✓ | 0.2609837          | ±0.0001097 | 0.00006689         | ±0.00000055 | 0.0008 |
| 20F04468         | 17.0 % | ✓ | 0.2479317          | ±0.0001130 | 0.00022733         | ±0.00000167 | 0.0031 |
| 20F04470         | 17.0 % | ✓ | 0.2663509          | ±0.0001155 | 0.00000293         | ±0.00000067 | 0.0001 |
| 20F04471         | 17.0 % | ✓ | 0.2661202          | ±0.0001158 | 0.00000391         | ±0.00000068 | 0.0001 |
| 20F04473         | 17.0 % | ✓ | 0.2663490          | ±0.0001166 | 0.00000342         | ±0.00000083 | 0.0001 |
| 20F04474         | 17.0 % | ✓ | 0.2668238          | ±0.0001134 | 0.00000168         | ±0.00000048 | 0.0000 |

| Results          | 40(a)/36(a) ± 1σ      |        | 40(r)/39(k) ± 1σ     |          | Age ± 1σ (Ma)             | MSWD |
|------------------|-----------------------|--------|----------------------|----------|---------------------------|------|
| Inverse Isochron | 303.47                | ±5.14  | 3.75467              | ±0.00090 | 10.93 ±0.03               | 6.54 |
| Error Chron      |                       | ±1.69% |                      | ±0.02%   | ±0.24%                    | 0%   |
|                  |                       |        |                      |          | Full External Error ±0.29 |      |
|                  |                       |        |                      |          | Analytical Error ±0.00    |      |
|                  |                       |        |                      |          |                           |      |
| Statistics       | 1σ Confidence Limit   | 1.27   | Convergence          |          | 0.0006935997              |      |
|                  | Error Magnification   | 2.5575 | Number of Iterations |          | 2                         |      |
|                  | Number of Data Points | 30     | Calculated Line      |          | Weighted York-2           |      |
|                  | Spreading Factor      | 7.1%   |                      |          |                           |      |

| Degassing Patterns |        |   | 36Ar(a)<br>[fA] | %1σ    | 36Ar(c)<br>[fA] | %1σ  | 36Ar(ca)<br>[fA] | %1σ   | 36Ar(cl)<br>[fA] | %1σ   | 37Ar(ca)<br>[fA] | %1σ   | 38Ar(a)<br>[fA] | %1σ    | 38Ar(c)<br>[fA] | %1σ  | 38Ar(k)<br>[fA] | %1σ  | 38Ar(ca)<br>[fA] | %1σ   | 38Ar(cl)<br>[fA] | %1σ   | 39Ar(k)<br>[fA] | %1σ  | 39Ar(ca)<br>[fA] | %1σ   |
|--------------------|--------|---|-----------------|--------|-----------------|------|------------------|-------|------------------|-------|------------------|-------|-----------------|--------|-----------------|------|-----------------|------|------------------|-------|------------------|-------|-----------------|------|------------------|-------|
| 20F04431           | 17.0 % | ✓ | 0.0005438       | 52.57  | 0.0000000       | 0.00 | 0.0008864        | 5.10  | 0.0000000        | 0.00  | 3.27928          | 5.10  | 0.0001025       | 52.57  | 0.0000000       | 0.00 | 1.319644        | 0.10 | 0.0005903        | 10.90 | 0.0000000        | 0.00  | 109.2692        | 0.04 | 0.0021069        | 5.18  |
| 20F04432           | 17.0 % | ✓ | 0.0000124       | #####  | 0.0000000       | 0.00 | 0.0007379        | 5.92  | 0.0000000        | 0.00  | 2.72977          | 5.91  | 0.0000023       | #####  | 0.0000000       | 0.00 | 1.405938        | 0.10 | 0.0004914        | 11.30 | 0.0000000        | 0.00  | 116.4145        | 0.04 | 0.0017539        | 5.99  |
| 20F04434           | 17.0 % | ✓ | 0.0003950       | 77.38  | 0.0000000       | 0.00 | 0.0008880        | 4.62  | 0.0000000        | 0.00  | 3.28525          | 4.62  | 0.0000745       | 77.38  | 0.0000000       | 0.00 | 1.474148        | 0.10 | 0.0005913        | 10.68 | 0.0000000        | 0.00  | 122.0624        | 0.04 | 0.0021108        | 4.71  |
| 20F04435           | 17.0 % | ✓ | 0.0809882       | 0.70   | 0.0000000       | 0.00 | 0.0017174        | 2.58  | 0.0000000        | 0.00  | 6.35378          | 2.58  | 0.0152663       | 0.72   | 0.0000000       | 0.00 | 4.327658        | 0.10 | 0.0011437        | 9.97  | 0.0000000        | 0.00  | 358.3388        | 0.04 | 0.0040823        | 2.74  |
| 20F04437           | 17.0 % | ✓ | 0.0056641       | 6.98   | 0.0000000       | 0.00 | 0.0011035        | 3.86  | 0.0000000        | 0.00  | 4.08259          | 3.86  | 0.0010677       | 6.99   | 0.0000000       | 0.00 | 4.902188        | 0.10 | 0.0007349        | 10.37 | 0.0000000        | 0.00  | 405.9111        | 0.04 | 0.0026231        | 3.96  |
| 20F04438           | 17.0 % | ✓ | 0.0029214       | 13.26  | 0.0000000       | 0.00 | 0.0012810        | 3.47  | 0.0000000        | 0.00  | 4.73900          | 3.46  | 0.0005507       | 13.26  | 0.0000000       | 0.00 | 2.551960        | 0.10 | 0.0008530        | 10.23 | 0.0000000        | 0.00  | 211.3075        | 0.04 | 0.0030448        | 3.58  |
| 20F04440           | 17.0 % | ✓ | 0.0834275       | 0.68   | 0.0000000       | 0.00 | 0.0010625        | 4.05  | 0.0000000        | 0.00  | 3.93080          | 4.05  | 0.0157261       | 0.70   | 0.0000000       | 0.00 | 3.855885        | 0.10 | 0.0007075        | 10.45 | 0.0000000        | 0.00  | 319.2751        | 0.04 | 0.0025255        | 4.15  |
| 20F04441           | 17.0 % | ✓ | 0.0093231       | 4.20   | 0.0000000       | 0.00 | 0.0009911        | 4.39  | 0.0000000        | 0.00  | 3.66671          | 4.38  | 0.0017574       | 4.21   | 0.0000000       | 0.00 | 2.019891        | 0.10 | 0.0006600        | 10.58 | 0.0000000        | 0.00  | 167.2511        | 0.04 | 0.0023559        | 4.48  |
| 20F04443           | 17.0 % | ✓ | 0.0083812       | 4.69   | 0.0000000       | 0.00 | 0.0017883        | 2.49  | 0.0000000        | 0.00  | 6.61604          | 2.48  | 0.0015799       | 4.69   | 0.0000000       | 0.00 | 4.350288        | 0.10 | 0.0011909        | 9.95  | 0.0000000        | 0.00  | 360.2126        | 0.04 | 0.0042508        | 2.65  |
| 20F04444           | 17.0 % | ✓ | 0.0013864       | 25.78  | 0.0000000       | 0.00 | 0.0007233        | 5.70  | 0.0000000        | 0.00  | 2.67609          | 5.70  | 0.0002613       | 25.78  | 0.0000000       | 0.00 | 1.467260        | 0.10 | 0.0004817        | 11.19 | 0.0000000        | 0.00  | 121.4921        | 0.04 | 0.0017194        | 5.77  |
| 20F04446           | 17.0 % | ✓ | 0.0028945       | 12.70  | 0.0000000       | 0.00 | 0.0010062        | 3.91  | 0.0000000        | 0.00  | 3.72248          | 3.91  | 0.0005456       | 12.70  | 0.0000000       | 0.00 | 2.805400        | 0.10 | 0.0006700        | 10.39 | 0.0000000        | 0.00  | 232.2928        | 0.04 | 0.0023917        | 4.01  |
| 20F04447           | 17.0 % | ✓ | 0.0028061       | 11.64  | 0.0000000       | 0.00 | 0.0013566        | 2.84  | 0.0000000        | 0.00  | 5.01878          | 2.84  | 0.0005289       | 11.65  | 0.0000000       | 0.00 | 2.262142        | 0.10 | 0.0009034        | 10.04 | 0.0000000        | 0.00  | 187.3099        | 0.04 | 0.0032246        | 2.98  |
| 20F04449           | 17.0 % | ✓ | 0.0068107       | 5.18   | 0.0000000       | 0.00 | 0.0014601        | 2.98  | 0.0000000        | 0.00  | 5.40170          | 2.98  | 0.0012838       | 5.18   | 0.0000000       | 0.00 | 2.515941        | 0.10 | 0.0009723        | 10.08 | 0.0000000        | 0.00  | 208.3250        | 0.04 | 0.0034706        | 3.11  |
| 20F04450           | 17.0 % | ✓ | 0.0023252       | 15.17  | 0.0000000       | 0.00 | 0.0007950        | 5.43  | 0.0000000        | 0.00  | 2.94104          | 5.43  | 0.0004383       | 15.17  | 0.0000000       | 0.00 | 2.756330        | 0.10 | 0.0005294        | 11.05 | 0.0000000        | 0.00  | 228.2297        | 0.04 | 0.0018896        | 5.50  |
| 20F04452           | 17.0 % | ✓ | 0.0350409       | 1.31   | 0.0000000       | 0.00 | 0.0022442        | 1.81  | 0.0000000        | 0.00  | 8.30250          | 1.80  | 0.0066052       | 1.32   | 0.0000000       | 0.00 | 4.448236        | 0.10 | 0.0014944        | 9.80  | 0.0000000        | 0.00  | 368.3229        | 0.04 | 0.0053344        | 2.02  |
| 20F04453           | 17.0 % | ✓ | 0.0111436       | 3.50   | 0.0000000       | 0.00 | 0.0014904        | 2.82  | 0.0000000        | 0.00  | 5.51398          | 2.82  | 0.0021006       | 3.50   | 0.0000000       | 0.00 | 2.927752        | 0.10 | 0.0009925        | 10.03 | 0.0000000        | 0.00  | 242.4238        | 0.04 | 0.0035427        | 2.96  |
| 20F04455           | 17.0 % | ✓ | 0.0443202       | 1.07   | 0.0000000       | 0.00 | 0.0011442        | 3.67  | 0.0000000        | 0.00  | 4.23325          | 3.67  | 0.0083544       | 1.08   | 0.0000000       | 0.00 | 4.065117        | 0.10 | 0.0007620        | 10.30 | 0.0000000        | 0.00  | 336.5999        | 0.04 | 0.0027199        | 3.78  |
| 20F04456           | 17.0 % | ✓ | 0.0077642       | 4.66   | 0.0000000       | 0.00 | 0.0010052        | 4.12  | 0.0000000        | 0.00  | 3.71893          | 4.12  | 0.0014636       | 4.66   | 0.0000000       | 0.00 | 2.059978        | 0.10 | 0.0006694        | 10.47 | 0.0000000        | 0.00  | 170.5703        | 0.04 | 0.0023894        | 4.22  |
| 20F04458           | 17.0 % | ✓ | 0.0000515       | 642.09 | 0.0000000       | 0.00 | 0.0015872        | 2.62  | 0.0000000        | 0.00  | 5.87182          | 2.62  | 0.0000097       | 642.09 | 0.0000000       | 0.00 | 2.494885        | 0.10 | 0.0010569        | 9.98  | 0.0000000        | 0.00  | 206.5816        | 0.04 | 0.0037726        | 2.78  |
| 20F04459           | 17.0 % | ✓ | 0.0025597       | 13.22  | 0.0000000       | 0.00 | 0.0011432        | 3.82  | 0.0000034        | 72.28 | 4.22948          | 3.81  | 0.0004825       | 13.22  | 0.0000000       | 0.00 | 1.648174        | 0.10 | 0.0007613        | 10.36 | 0.0139905        | 72.28 | 136.4722        | 0.04 | 0.0027174        | 3.92  |
| 20F04461           | 17.0 % | ✓ | 0.0112514       | 3.59   | 0.0000000       | 0.00 | 0.0014112        | 3.05  | 0.0000000        | 0.00  | 5.22100          | 3.05  | 0.0021209       | 3.60   | 0.0000000       | 0.00 | 2.884972        | 0.10 | 0.0009398        | 10.10 | 0.0000000        | 0.00  | 238.8815        | 0.04 | 0.0033545        | 3.18  |
| 20F04462           | 17.0 % | ✓ | 0.1294097       | 0.51   | 0.0000000       | 0.00 | 0.0012940        | 3.18  | 0.0000000        | 0.00  | 4.78733          | 3.18  | 0.0243937       | 0.53   | 0.0000000       | 0.00 | 2.640762        | 0.10 | 0.0008617        | 10.14 | 0.0000000        | 0.00  | 218.6605        | 0.04 | 0.0030759        | 3.31  |
| 20F04464           | 17.0 % | ✓ | 0.0012646       | 26.90  | 0.0000000       | 0.00 | 0.0003984        | 10.91 | 0.0000000        | 0.00  | 1.47388          | 10.91 | 0.0002384       | 26.90  | 0.0000000       | 0.00 | 1.673973        | 0.10 | 0.0002653        | 14.55 | 0.0000000        | 0.00  | 138.6083        | 0.04 | 0.0009470        | 10.95 |
| 20F04465           | 17.0 % | ✓ | 0.0023147       | 15.04  | 0.0000000       | 0.00 | 0.0014718        | 3.10  | 0.0000000        | 0.00  | 5.44492          | 3.10  | 0.0004363       | 15.04  | 0.0000000       | 0.00 | 2.099964        | 0.10 | 0.0009801        | 10.12 | 0.0000000        | 0.00  | 173.8812        | 0.04 | 0.0034984        | 3.23  |
| 20F04467           | 17.0 % | ✓ | 0.0551752       | 0.82   | 0.0000000       | 0.00 | 0.0012086        | 3.45  | 0.0000000        | 0.00  | 4.47122          | 3.45  | 0.0104005       | 0.83   | 0.0000000       | 0.00 | 2.599715        | 0.10 | 0.0008048        | 10.23 | 0.0000000        | 0.00  | 215.2616        | 0.04 | 0.0028728        | 3.57  |
| 20F04468           | 17.0 % | ✓ | 0.0714199       | 0.74   | 0.0000000       | 0.00 | 0.0005611        | 7.45  | 0.0000045        | 48.67 | 2.07571          | 7.45  | 0.0134627       | 0.75   | 0.0000000       | 0.00 | 0.940711        | 0.10 | 0.0003736        | 12.17 | 0.0185355        | 48.68 | 77.8928         | 0.04 | 0.0013336        | 7.50  |
| 20F04470           | 17.0 % | ✓ | 0.0013820       | 23.04  | 0.0000000       | 0.00 | 0.0007496        | 5.32  | 0.0000000        | 0.00  | 2.77339          | 5.32  | 0.0002605       | 23.04  | 0.0000000       | 0.00 | 1.518172        | 0.10 | 0.0004992        | 11.00 | 0.0000000        | 0.00  | 125.7077        | 0.04 | 0.0017819        | 5.40  |
| 20F04471           | 17.0 % | ✓ | 0.0017025       | 17.49  | 0.0000000       | 0.00 | 0.0007648        | 5.36  | 0.0000000        | 0.00  | 2.82940          | 5.36  | 0.0003209       | 17.49  | 0.0000000       | 0.00 | 1.399656        | 0.10 | 0.0005093        | 11.02 | 0.0000000        | 0.00  | 115.8943        | 0.04 | 0.0018179        | 5.44  |
| 20F04473           | 17.0 % | ✓ | 0.0013970       | 24.20  | 0.0000000       | 0.00 | 0.0008582        | 4.92  | 0.0000000        | 0.00  | 3.17489          | 4.92  | 0.0002633       | 24.20  | 0.0000000       | 0.00 | 1.313100        | 0.10 | 0.0005715        | 10.81 | 0.0000000        | 0.00  | 108.7273        | 0.04 | 0.0020399        | 5.01  |
| 20F04474           | 17.0 % | ✓ | 0.0010926       | 28.88  | 0.0000000       | 0.00 | 0.0009725        | 4.60  | 0.0000000        | 0.00  | 3.59793          | 4.60  | 0.0002059       | 28.88  | 0.0000000       | 0.00 | 2.097803        | 0.10 | 0.0006476        | 10.67 | 0.0000000        | 0.00  | 173.7023        | 0.04 | 0.0023117        | 4.69  |
| Σ                  |        |   | 0.5683828       | 0.39   | 0.0000000       | 0.00 | 0.0341018        | 0.68  | 0.0000078        | 41.66 | 126.16292        | 0.68  | 0.1071402       | 0.39   | 0.0000000       | 0.00 | 74.827641       | 0.02 | 0.0227093        | 1.98  | 0.0325260        | 41.67 | 6195.8799       | 0.01 | 0.0810597        | 0.70  |
| Σ                  |        |   |                 |        |                 |      |                  |       | 0.6024925        | 0.37  | 126.16292        | 0.68  |                 |        |                 |      |                 |      |                  |       | 74.990017        | 0.03  |                 |      | 6195.9609        | 0.01  |

| 40Ar(r)<br>[fA] | %1σ  | 40Ar(a)<br>[fA] | %1σ    | 40Ar(c)<br>[fA] | %1σ  | 40Ar(k)<br>[fA] | %1σ  |
|-----------------|------|-----------------|--------|-----------------|------|-----------------|------|
| 410.656         | 0.02 | 0.16235         | 52.57  | 0.0000000       | 0.00 | 0.0663264       | 9.65 |
| 437.093         | 0.02 | 0.00372         | #####  | 0.0000000       | 0.00 | 0.0706636       | 9.65 |
| 458.616         | 0.02 | 0.11794         | 77.38  | 0.0000000       | 0.00 | 0.0740919       | 9.65 |
| 1347.811        | 0.01 | 24.17983        | 0.71   | 0.0000000       | 0.00 | 0.2175117       | 9.65 |
| 1524.445        | 0.01 | 1.69108         | 6.98   | 0.0000000       | 0.00 | 0.2463880       | 9.65 |
| 793.873         | 0.02 | 0.87223         | 13.26  | 0.0000000       | 0.00 | 0.1282636       | 9.65 |
| 1200.331        | 0.01 | 24.90810        | 0.69   | 0.0000000       | 0.00 | 0.1938000       | 9.65 |
| 628.353         | 0.02 | 2.78351         | 4.20   | 0.0000000       | 0.00 | 0.1015214       | 9.65 |
| 1352.753        | 0.01 | 2.50229         | 4.69   | 0.0000000       | 0.00 | 0.2186491       | 9.65 |
| 456.778         | 0.02 | 0.41392         | 25.78  | 0.0000000       | 0.00 | 0.0737457       | 9.65 |
| 872.424         | 0.01 | 0.86418         | 12.70  | 0.0000000       | 0.00 | 0.1410017       | 9.65 |
| 702.838         | 0.02 | 0.83779         | 11.64  | 0.0000000       | 0.00 | 0.1136971       | 9.65 |
| 780.935         | 0.01 | 2.03339         | 5.18   | 0.0000000       | 0.00 | 0.1264533       | 9.65 |
| 856.838         | 0.01 | 0.69420         | 15.17  | 0.0000000       | 0.00 | 0.1385354       | 9.65 |
| 1385.303        | 0.01 | 10.46180        | 1.32   | 0.0000000       | 0.00 | 0.2235720       | 9.65 |
| 910.071         | 0.01 | 3.32703         | 3.50   | 0.0000000       | 0.00 | 0.1471512       | 9.65 |
| 1264.752        | 0.01 | 13.23225        | 1.07   | 0.0000000       | 0.00 | 0.2043161       | 9.65 |
| 639.063         | 0.02 | 2.31809         | 4.66   | 0.0000000       | 0.00 | 0.1035362       | 9.65 |
| 775.900         | 0.01 | 0.01536         | 642.09 | 0.0000000       | 0.00 | 0.1253950       | 9.65 |
| 512.958         | 0.02 | 0.76424         | 13.22  | 0.0000000       | 0.00 | 0.0828386       | 9.65 |
| 897.056         | 0.01 | 3.35923         | 3.60   | 0.0000000       | 0.00 | 0.1450011       | 9.65 |
| 820.431         | 0.03 | 38.63657        | 0.52   | 0.0000000       | 0.00 | 0.1327269       | 9.65 |
| 520.487         | 0.02 | 0.37756         | 26.90  | 0.0000000       | 0.00 | 0.0841353       | 9.65 |
| 651.329         | 0.02 | 0.69109         | 15.04  | 0.0000000       | 0.00 | 0.1055459       | 9.65 |
| 808.336         | 0.02 | 16.47310        | 0.83   | 0.0000000       | 0.00 | 0.1306638       | 9.65 |
| 292.847         | 0.06 | 21.32313        | 0.74   | 0.0000000       | 0.00 | 0.0472809       | 9.65 |
| 471.550         | 0.02 | 0.41262         | 23.04  | 0.0000000       | 0.00 | 0.0763046       | 9.65 |
| 436.005         | 0.02 | 0.50829         | 17.49  | 0.0000000       | 0.00 | 0.0703479       | 9.65 |
| 407.797         | 0.03 | 0.41710         | 24.20  | 0.0000000       | 0.00 | 0.0659975       | 9.65 |
| 650.674         | 0.02 | 0.32619         | 28.88  | 0.0000000       | 0.00 | 0.1054373       | 9.65 |
| 23268.301       | 0.00 | 169.69637       | 0.39   | 0.0000000       | 0.00 | 3.7608991       | 1.92 |
| 23441.759       |      |                 |        |                 |      |                 | 0.00 |

| Additional Parameters |        |   | 40Ar/39Ar | 1σ       | 37Ar/39Ar | 1σ       | 36Ar/39Ar | 1σ       | Time (days) | 37Ar (decay) | 39Ar (decay) | 40Ar (moles) |
|-----------------------|--------|---|-----------|----------|-----------|----------|-----------|----------|-------------|--------------|--------------|--------------|
| 20F04431              | 17.0 % | ✓ | 3.757254  | 0.001640 | 0.030010  | 0.001530 | 0.000003  | 0.000003 | 147.912     | 18.616265    | 1.00104510   | 1.453E-11    |
| 20F04432              | 17.0 % | ✓ | 3.755210  | 0.001637 | 0.023448  | 0.001387 | 0.000006  | 0.000002 | 147.919     | 18.618564    | 1.00104514   | 1.548E-11    |
| 20F04434              | 17.0 % | ✓ | 3.756798  | 0.001617 | 0.026914  | 0.001244 | 0.000004  | 0.000002 | 147.931     | 18.622906    | 1.00104523   | 1.623E-11    |
| 20F04435              | 17.0 % | ✓ | 3.829318  | 0.001582 | 0.017731  | 0.000457 | 0.000231  | 0.000002 | 147.937     | 18.625205    | 1.00104527   | 4.858E-11    |
| 20F04437              | 17.0 % | ✓ | 3.760362  | 0.001548 | 0.010058  | 0.000388 | 0.000017  | 0.000001 | 147.949     | 18.629549    | 1.00104535   | 5.403E-11    |
| 20F04438              | 17.0 % | ✓ | 3.761635  | 0.001584 | 0.022427  | 0.000777 | 0.000020  | 0.000002 | 147.954     | 18.631593    | 1.00104539   | 2.814E-11    |
| 20F04440              | 17.0 % | ✓ | 3.838141  | 0.001588 | 0.012312  | 0.000498 | 0.000265  | 0.000002 | 147.967     | 18.636194    | 1.00104548   | 4.338E-11    |
| 20F04441              | 17.0 % | ✓ | 3.774140  | 0.001612 | 0.021923  | 0.000961 | 0.000062  | 0.000002 | 147.972     | 18.638239    | 1.00104552   | 2.235E-11    |
| 20F04443              | 17.0 % | ✓ | 3.762938  | 0.001561 | 0.018367  | 0.000456 | 0.000028  | 0.000001 | 147.984     | 18.642585    | 1.00104560   | 4.798E-11    |
| 20F04444              | 17.0 % | ✓ | 3.763697  | 0.001624 | 0.022027  | 0.001255 | 0.000017  | 0.000003 | 147.990     | 18.644887    | 1.00104565   | 1.619E-11    |
| 20F04446              | 17.0 % | ✓ | 3.752556  | 0.001572 | 0.016025  | 0.000626 | 0.000008  | 0.000002 | 148.002     | 18.649235    | 1.00104573   | 3.086E-11    |
| 20F04447              | 17.0 % | ✓ | 3.748341  | 0.001576 | 0.026794  | 0.000760 | 0.000008  | 0.000002 | 148.008     | 18.651538    | 1.00104578   | 2.485E-11    |
| 20F04449              | 17.0 % | ✓ | 3.758945  | 0.001578 | 0.025929  | 0.000772 | 0.000040  | 0.000002 | 148.020     | 18.655887    | 1.00104586   | 2.772E-11    |
| 20F04450              | 17.0 % | ✓ | 3.757899  | 0.001577 | 0.012886  | 0.000699 | 0.000014  | 0.000002 | 148.026     | 18.657935    | 1.00104590   | 3.036E-11    |
| 20F04452              | 17.0 % | ✓ | 3.790065  | 0.001566 | 0.022541  | 0.000406 | 0.000101  | 0.000001 | 148.037     | 18.662286    | 1.00104598   | 4.942E-11    |
| 20F04453              | 17.0 % | ✓ | 3.768325  | 0.001575 | 0.022745  | 0.000640 | 0.000052  | 0.000002 | 148.044     | 18.664590    | 1.00104603   | 3.234E-11    |
| 20F04455              | 17.0 % | ✓ | 3.797321  | 0.001571 | 0.012576  | 0.000461 | 0.000135  | 0.000001 | 148.056     | 18.668943    | 1.00104611   | 4.525E-11    |
| 20F04456              | 17.0 % | ✓ | 3.760768  | 0.001598 | 0.021803  | 0.000898 | 0.000051  | 0.000002 | 148.062     | 18.671247    | 1.00104615   | 2.271E-11    |
| 20F04458              | 17.0 % | ✓ | 3.756366  | 0.001581 | 0.028423  | 0.000744 | 0.000007  | 0.000002 | 148.074     | 18.675602    | 1.00104624   | 2.747E-11    |
| 20F04459              | 17.0 % | ✓ | 3.764835  | 0.001624 | 0.030991  | 0.001182 | 0.000027  | 0.000002 | 148.079     | 18.677651    | 1.00104628   | 1.819E-11    |
| 20F04461              | 17.0 % | ✓ | 3.769852  | 0.001577 | 0.021856  | 0.000666 | 0.000053  | 0.000002 | 148.091     | 18.682007    | 1.00104636   | 3.188E-11    |
| 20F04462              | 17.0 % | ✓ | 3.929326  | 0.001642 | 0.021894  | 0.000695 | 0.000598  | 0.000003 | 148.097     | 18.684313    | 1.00104640   | 3.042E-11    |
| 20F04464              | 17.0 % | ✓ | 3.758399  | 0.001606 | 0.010633  | 0.001160 | 0.000012  | 0.000002 | 148.109     | 18.688671    | 1.00104649   | 1.844E-11    |
| 20F04465              | 17.0 % | ✓ | 3.750335  | 0.001596 | 0.031313  | 0.000970 | 0.000022  | 0.000002 | 148.115     | 18.690978    | 1.00104653   | 2.309E-11    |
| 20F04467              | 17.0 % | ✓ | 3.832213  | 0.001609 | 0.020771  | 0.000717 | 0.000262  | 0.000002 | 148.127     | 18.695337    | 1.00104661   | 2.920E-11    |
| 20F04468              | 17.0 % | ✓ | 4.033907  | 0.001837 | 0.026648  | 0.001984 | 0.000924  | 0.000007 | 148.133     | 18.697389    | 1.00104665   | 1.112E-11    |
| 20F04470              | 17.0 % | ✓ | 3.754999  | 0.001627 | 0.022062  | 0.001174 | 0.000017  | 0.000003 | 148.145     | 18.702006    | 1.00104674   | 1.671E-11    |
| 20F04471              | 17.0 % | ✓ | 3.758249  | 0.001634 | 0.024413  | 0.001309 | 0.000008  | 0.000003 | 148.151     | 18.704058    | 1.00104678   | 1.542E-11    |
| 20F04473              | 17.0 % | ✓ | 3.755009  | 0.001643 | 0.029200  | 0.001437 | 0.000021  | 0.000003 | 148.162     | 18.708420    | 1.00104686   | 1.445E-11    |
| 20F04474              | 17.0 % | ✓ | 3.748348  | 0.001592 | 0.020713  | 0.000953 | 0.000012  | 0.000002 | 148.169     | 18.710730    | 1.00104691   | 2.305E-11    |

| Procedure<br>Blanks |        | 36Ar ± 1σ (SE)<br>[fA] | 37Ar ± 1σ (SE)<br>[fA] | 38Ar ± 1σ (SE)<br>[fA] | 39Ar ± 1σ (SE)<br>[fA] | 40Ar ± 1σ (SE)<br>[fA] |
|---------------------|--------|------------------------|------------------------|------------------------|------------------------|------------------------|
| 20F04431            | 17.0 % | 0.0082615 ±0.0001838   | 0.0119219 ±0.0064912   | 0.0271200 ±0.0070737   | 0.0269037 ±0.0061260   | 1.7849515 ±0.0148690   |
| 20F04432            | 17.0 % | 0.0082615 ±0.0001838   | 0.0119219 ±0.0064912   | 0.0271200 ±0.0070737   | 0.0269037 ±0.0061260   | 1.7849515 ±0.0148690   |
| 20F04434            | 17.0 % | 0.0079127 ±0.0001825   | 0.0185896 ±0.0056776   | 0.0220903 ±0.0065362   | 0.0242702 ±0.0068134   | 1.8001332 ±0.0135494   |
| 20F04435            | 17.0 % | 0.0079127 ±0.0001825   | 0.0185896 ±0.0056776   | 0.0220903 ±0.0065362   | 0.0242702 ±0.0068134   | 1.8001332 ±0.0135494   |
| 20F04437            | 17.0 % | 0.0094350 ±0.0002088   | 0.0111017 ±0.0058589   | 0.0271783 ±0.0068953   | 0.0253770 ±0.0063857   | 2.2817775 ±0.0161449   |
| 20F04438            | 17.0 % | 0.0094350 ±0.0002088   | 0.0111017 ±0.0058589   | 0.0271783 ±0.0068953   | 0.0253770 ±0.0063857   | 2.2817775 ±0.0161449   |
| 20F04440            | 17.0 % | 0.0090639 ±0.0001956   | 0.0123496 ±0.0063474   | 0.0309249 ±0.0064320   | 0.0185552 ±0.0064289   | 1.8779467 ±0.0158840   |
| 20F04441            | 17.0 % | 0.0090639 ±0.0001956   | 0.0123496 ±0.0063474   | 0.0309249 ±0.0064320   | 0.0185552 ±0.0064289   | 1.8779467 ±0.0158840   |
| 20F04443            | 17.0 % | 0.0103729 ±0.0002116   | 0.0115412 ±0.0054458   | 0.0254050 ±0.0065809   | 0.0316952 ±0.0058502   | 2.3605335 ±0.0154295   |
| 20F04444            | 17.0 % | 0.0103729 ±0.0002116   | 0.0115412 ±0.0054458   | 0.0254050 ±0.0065809   | 0.0316952 ±0.0058502   | 2.3605335 ±0.0154295   |
| 20F04446            | 17.0 % | 0.0116291 ±0.0001963   | 0.0100266 ±0.0050926   | 0.0306649 ±0.0069950   | 0.0216093 ±0.0067940   | 2.7067820 ±0.0144854   |
| 20F04447            | 17.0 % | 0.0116291 ±0.0001963   | 0.0100266 ±0.0050926   | 0.0306649 ±0.0069950   | 0.0216093 ±0.0067940   | 2.7067820 ±0.0144854   |
| 20F04449            | 17.0 % | 0.0083811 ±0.0001968   | 0.0155902 ±0.0059536   | 0.0290019 ±0.0071127   | 0.0252514 ±0.0061039   | 1.8341722 ±0.0163388   |
| 20F04450            | 17.0 % | 0.0083811 ±0.0001968   | 0.0155902 ±0.0059536   | 0.0290019 ±0.0071127   | 0.0252514 ±0.0061039   | 1.8341722 ±0.0163388   |
| 20F04452            | 17.0 % | 0.0080874 ±0.0001886   | 0.0145347 ±0.0055343   | 0.0337260 ±0.0060963   | 0.0320035 ±0.0063164   | 1.8207018 ±0.0139993   |
| 20F04453            | 17.0 % | 0.0080874 ±0.0001886   | 0.0145347 ±0.0055343   | 0.0337260 ±0.0060963   | 0.0320035 ±0.0063164   | 1.8207018 ±0.0139993   |
| 20F04455            | 17.0 % | 0.0079727 ±0.0001974   | 0.0100392 ±0.0056290   | 0.0343233 ±0.0063698   | 0.0120379 ±0.0058032   | 1.7620744 ±0.0160601   |
| 20F04456            | 17.0 % | 0.0079727 ±0.0001974   | 0.0100392 ±0.0056290   | 0.0343233 ±0.0063698   | 0.0120379 ±0.0058032   | 1.7620744 ±0.0160601   |
| 20F04458            | 17.0 % | 0.0088311 ±0.0001993   | 0.0267463 ±0.0058292   | 0.0380297 ±0.0062221   | 0.0221915 ±0.0060833   | 1.9072360 ±0.0155861   |
| 20F04459            | 17.0 % | 0.0088311 ±0.0001993   | 0.0267463 ±0.0058292   | 0.0380297 ±0.0062221   | 0.0221915 ±0.0060833   | 1.9072360 ±0.0155861   |
| 20F04461            | 17.0 % | 0.0102397 ±0.0002046   | 0.0164139 ±0.0055060   | 0.0268292 ±0.0066757   | 0.0318284 ±0.0060034   | 2.4194750 ±0.0155269   |
| 20F04462            | 17.0 % | 0.0102397 ±0.0002046   | 0.0164139 ±0.0055060   | 0.0268292 ±0.0066757   | 0.0318284 ±0.0060034   | 2.4194750 ±0.0155269   |
| 20F04464            | 17.0 % | 0.0089344 ±0.0001944   | 0.0207179 ±0.0062014   | 0.0230651 ±0.0070794   | 0.0363257 ±0.0060079   | 1.8701054 ±0.0157713   |
| 20F04465            | 17.0 % | 0.0089344 ±0.0001944   | 0.0207179 ±0.0062014   | 0.0230651 ±0.0070794   | 0.0363257 ±0.0060079   | 1.8701054 ±0.0157713   |
| 20F04467            | 17.0 % | 0.0088311 ±0.0001993   | 0.0267463 ±0.0058292   | 0.0380297 ±0.0062221   | 0.0221915 ±0.0060833   | 1.9072360 ±0.0155861   |
| 20F04468            | 17.0 % | 0.0088311 ±0.0001993   | 0.0267463 ±0.0058292   | 0.0380297 ±0.0062221   | 0.0221915 ±0.0060833   | 1.9072360 ±0.0155861   |
| 20F04470            | 17.0 % | 0.0102397 ±0.0002046   | 0.0164139 ±0.0055060   | 0.0268292 ±0.0066757   | 0.0318284 ±0.0060034   | 2.4194750 ±0.0155269   |
| 20F04471            | 17.0 % | 0.0102397 ±0.0002046   | 0.0164139 ±0.0055060   | 0.0268292 ±0.0066757   | 0.0318284 ±0.0060034   | 2.4194750 ±0.0155269   |
| 20F04473            | 17.0 % | 0.0089344 ±0.0001944   | 0.0207179 ±0.0062014   | 0.0230651 ±0.0070794   | 0.0363257 ±0.0060079   | 1.8701054 ±0.0157713   |
| 20F04474            | 17.0 % | 0.0089344 ±0.0001944   | 0.0207179 ±0.0062014   | 0.0230651 ±0.0070794   | 0.0363257 ±0.0060079   | 1.8701054 ±0.0157713   |

| Intercept Values |        | 36Ar ± 1σ (SE)<br>[fA] | r2     | Regression<br>(type,n) | 37Ar ± 1σ (SE)<br>[fA] | r2     | Regression<br>(type,n) | 38Ar ± 1σ (SE)<br>[fA] | r2     | Regression<br>(type,n) | 39Ar ± 1σ (SE)<br>[fA] | r2     | Regression<br>(type,n) | 40Ar ± 1σ (SE)<br>[fA] |
|------------------|--------|------------------------|--------|------------------------|------------------------|--------|------------------------|------------------------|--------|------------------------|------------------------|--------|------------------------|------------------------|
| 20F04431         | 17.0 % | 0.0086013 ±0.0002111   | 0.9720 | EXP 150 of 150         | 0.1639392 ±0.0061391   | 0.0996 | EXP 150 of 150         | 1.2722608 ±0.0073233   | 0.7647 | EXP 150 of 150         | 109.07043 ±0.01400     | 0.9999 | EXP 149 of 150         | 412.34491 ±0.02943     |
| 20F04432         | 17.0 % | 0.0090056 ±0.0002044   | 0.9782 | EXP 150 of 150         | 0.1344521 ±0.0056934   | 0.0855 | EXP 150 of 150         | 1.3763622 ±0.0062156   | 0.8399 | EXP 149 of 150         | 116.20401 ±0.01465     | 0.9999 | EXP 150 of 150         | 438.95248 ±0.03322     |
| 20F04434         | 17.0 % | 0.0084016 ±0.0002386   | 0.9714 | EXP 149 of 150         | 0.1575289 ±0.0057791   | 0.0586 | EXP 150 of 150         | 1.4183771 ±0.0064732   | 0.8311 | EXP 150 of 150         | 121.84589 ±0.01314     | 0.9999 | EXP 150 of 150         | 460.37182 ±0.03307     |
| 20F04435         | 17.0 % | 0.0899342 ±0.0005147   | 0.9327 | EXP 150 of 150         | 0.3219875 ±0.0065352   | 0.1950 | EXP 150 of 150         | 4.2818947 ±0.0073673   | 0.9731 | EXP 150 of 150         | 357.74809 ±0.02183     | 1.0000 | EXP 150 of 150         | 1374.00897 ±0.06109    |
| 20F04437         | 17.0 % | 0.0161467 ±0.0003292   | 0.9874 | EXP 150 of 150         | 0.2076834 ±0.0059954   | 0.1565 | EXP 150 of 150         | 4.8405346 ±0.0067535   | 0.9822 | EXP 149 of 150         | 405.24202 ±0.02285     | 1.0000 | EXP 149 of 150         | 1528.66440 ±0.05591    |
| 20F04438         | 17.0 % | 0.0136026 ±0.0003194   | 0.9755 | EXP 149 of 150         | 0.2428327 ±0.0064635   | 0.1296 | EXP 150 of 150         | 2.5107157 ±0.0065110   | 0.9397 | EXP 150 of 150         | 210.94867 ±0.01992     | 0.9999 | EXP 150 of 150         | 797.15487 ±0.04011     |
| 20F04440         | 17.0 % | 0.0928550 ±0.0005085   | 0.9180 | EXP 150 of 150         | 0.1982260 ±0.0056055   | 0.1166 | EXP 150 of 150         | 3.8115132 ±0.0061808   | 0.9759 | EXP 149 of 150         | 318.75062 ±0.02146     | 1.0000 | EXP 150 of 150         | 1227.31037 ±0.04779    |
| 20F04441         | 17.0 % | 0.0192928 ±0.0003326   | 0.9621 | EXP 150 of 150         | 0.1840572 ±0.0057535   | 0.1237 | EXP 150 of 150         | 1.9792821 ±0.0068701   | 0.8886 | EXP 150 of 150         | 166.96851 ±0.01889     | 0.9999 | EXP 150 of 150         | 633.11571 ±0.03485     |
| 20F04443         | 17.0 % | 0.0204582 ±0.0003240   | 0.9858 | EXP 149 of 150         | 0.3427629 ±0.0067418   | 0.2518 | EXP 150 of 150         | 4.2789978 ±0.0071537   | 0.9740 | EXP 149 of 150         | 359.61154 ±0.02622     | 1.0000 | EXP 150 of 150         | 1357.83447 ±0.05816    |
| 20F04444         | 17.0 % | 0.0124652 ±0.0002814   | 0.9683 | EXP 150 of 150         | 0.1317520 ±0.0060503   | 0.0658 | EXP 150 of 150         | 1.4248033 ±0.0057244   | 0.8775 | EXP 149 of 150         | 121.26865 ±0.01372     | 0.9999 | EXP 150 of 150         | 459.62654 ±0.03375     |
| 20F04446         | 17.0 % | 0.0097564 ±0.0003047   | 0.9788 | EXP 150 of 150         | 0.1892499 ±0.0058243   | 0.1307 | EXP 150 of 150         | 2.7457412 ±0.0069274   | 0.9427 | EXP 150 of 150         | 231.90357 ±0.02001     | 0.9999 | EXP 150 of 150         | 874.40725 ±0.04317     |
| 20F04447         | 17.0 % | 0.0101916 ±0.0002550   | 0.9831 | EXP 148 of 150         | 0.2586117 ±0.0055485   | 0.2194 | EXP 149 of 150         | 2.2001151 ±0.0070317   | 0.9081 | EXP 149 of 150         | 186.99320 ±0.01646     | 0.9999 | EXP 150 of 150         | 704.82036 ±0.03647     |
| 20F04449         | 17.0 % | 0.0165834 ±0.0002858   | 0.9778 | EXP 149 of 150         | 0.2734771 ±0.0060777   | 0.2155 | EXP 150 of 150         | 2.4702942 ±0.0069884   | 0.9318 | EXP 149 of 150         | 207.97137 ±0.01872     | 0.9999 | EXP 150 of 150         | 784.92929 ±0.03796     |
| 20F04450         | 17.0 % | 0.0114754 ±0.0002860   | 0.9815 | EXP 149 of 150         | 0.1417795 ±0.0060806   | 0.0454 | EXP 150 of 150         | 2.7078040 ±0.0065115   | 0.9474 | EXP 146 of 150         | 227.84281 ±0.01950     | 0.9999 | EXP 149 of 150         | 859.50539 ±0.04860     |
| 20F04452         | 17.0 % | 0.0450640 ±0.0004097   | 0.9737 | EXP 150 of 150         | 0.4296139 ±0.0054319   | 0.4193 | EXP 150 of 150         | 4.3816941 ±0.0072983   | 0.9751 | EXP 150 of 150         | 367.70957 ±0.02455     | 1.0000 | EXP 150 of 150         | 1397.80866 ±0.05114    |
| 20F04453         | 17.0 % | 0.0206169 ±0.0003340   | 0.9767 | EXP 150 of 150         | 0.2804034 ±0.0060543   | 0.2050 | EXP 149 of 150         | 2.8771082 ±0.0067311   | 0.9525 | EXP 150 of 150         | 242.00916 ±0.01942     | 0.9999 | EXP 150 of 150         | 915.36573 ±0.04747     |
| 20F04455         | 17.0 % | 0.0530611 ±0.0004178   | 0.9665 | EXP 148 of 150         | 0.2163408 ±0.0060200   | 0.1406 | EXP 150 of 150         | 4.0261533 ±0.0065626   | 0.9765 | EXP 149 of 150         | 336.05433 ±0.02208     | 1.0000 | EXP 150 of 150         | 1279.95018 ±0.05393    |
| 20F04456         | 17.0 % | 0.0166696 ±0.0002961   | 0.9736 | EXP 150 of 150         | 0.1888125 ±0.0058911   | 0.1109 | EXP 150 of 150         | 2.0019647 ±0.0071806   | 0.8893 | EXP 150 of 150         | 170.28893 ±0.01808     | 0.9999 | EXP 150 of 150         | 643.24636 ±0.03484     |
| 20F04458         | 17.0 % | 0.0103541 ±0.0002568   | 0.9834 | EXP 149 of 150         | 0.2871471 ±0.0056320   | 0.2436 | EXP 149 of 150         | 2.4331448 ±0.0059245   | 0.9465 | EXP 146 of 150         | 206.23402 ±0.01874     | 0.9999 | EXP 150 of 150         | 777.91737 ±0.04253     |
| 20F04459         | 17.0 % | 0.0125068 ±0.0002663   | 0.9723 | EXP 150 of 150         | 0.1993269 ±0.0062775   | 0.1110 | EXP 150 of 150         | 1.6235506 ±0.0067031   | 0.8678 | EXP 150 of 150         | 136.23525 ±0.01573     | 0.9999 | EXP 150 of 150         | 515.71254 ±0.03699     |
| 20F04461         | 17.0 % | 0.0227977 ±0.0003416   | 0.9719 | EXP 150 of 150         | 0.2625925 ±0.0063645   | 0.1519 | EXP 150 of 150         | 2.8579653 ±0.0065512   | 0.9533 | EXP 150 of 150         | 238.47242 ±0.02062     | 0.9999 | EXP 149 of 150         | 902.98002 ±0.04135     |
| 20F04462         | 17.0 % | 0.1398623 ±0.0005840   | 0.6328 | EXP 148 of 150         | 0.2393862 ±0.0058657   | 0.1807 | EXP 150 of 150         | 2.5846424 ±0.0062364   | 0.9448 | EXP 149 of 150         | 218.28332 ±0.01810     | 0.9999 | EXP 149 of 150         | 861.61993 ±0.03938     |
| 20F04464         | 17.0 % | 0.0105837 ±0.0002724   | 0.9705 | EXP 150 of 150         | 0.0580172 ±0.0059306   | 0.0158 | EXP 150 of 150         | 1.6296447 ±0.0070556   | 0.8550 | EXP 148 of 150         | 138.35210 ±0.01441     | 0.9999 | EXP 150 of 150         | 522.81905 ±0.03423     |
| 20F04465         | 17.0 % | 0.0126896 ±0.0002816   | 0.9751 | EXP 150 of 150         | 0.2701149 ±0.0064107   | 0.1489 | EXP 150 of 150         | 2.0735931 ±0.0065150   | 0.9227 | EXP 147 of 150         | 173.57133 ±0.01856     | 0.9999 | EXP 150 of 150         | 653.99607 ±0.03734     |
| 20F04467         | 17.0 % | 0.0647484 ±0.0003886   | 0.9315 | EXP 150 of 150         | 0.2120221 ±0.0057280   | 0.2227 | EXP 150 of 150         | 2.5428926 ±0.0062510   | 0.9460 | EXP 150 of 150         | 214.89930 ±0.01966     | 0.9999 | EXP 150 of 150         | 826.84671 ±0.03981     |
| 20F04468         | 17.0 % | 0.0802211 ±0.0004654   | 0.5525 | EXP 150 of 150         | 0.0840869 ±0.0058231   | 0.0264 | EXP 150 of 150         | 0.9339835 ±0.0060259   | 0.7433 | EXP 150 of 150         | 77.74777 ±0.01271      | 0.9998 | EXP 150 of 150         | 316.12476 ±0.02741     |
| 20F04470         | 17.0 % | 0.0123538 ±0.0002371   | 0.9745 | EXP 147 of 150         | 0.1316354 ±0.0055927   | 0.0824 | EXP 150 of 150         | 1.4621962 ±0.0068058   | 0.8278 | EXP 150 of 150         | 125.47729 ±0.01563     | 0.9999 | EXP 150 of 150         | 474.45840 ±0.03140     |
| 20F04471         | 17.0 % | 0.0093098 ±0.0002089   | 0.9792 | EXP 150 of 150         | 0.1346091 ±0.0059007   | 0.1019 | EXP 149 of 150         | 1.3563161 ±0.0063967   | 0.8360 | EXP 150 of 150         | 115.67963 ±0.01457     | 0.9999 | EXP 148 of 150         | 437.98614 ±0.03004     |
| 20F04473         | 17.0 % | 0.0111710 ±0.0002699   | 0.9611 | EXP 150 of 150         | 0.1487065 ±0.0055257   | 0.0812 | EXP 149 of 150         | 1.2603328 ±0.0070778   | 0.7546 | EXP 149 of 150         | 108.51973 ±0.01425     | 0.9998 | EXP 150 of 150         | 410.14976 ±0.02930     |
| 20F04474         | 17.0 % | 0.0109824 ±0.0002411   | 0.9803 | EXP 148 of 150         | 0.1712580 ±0.0062361   | 0.0866 | EXP 150 of 150         | 2.0558117 ±0.0062929   | 0.9124 | EXP 149 of 150         | 173.39143 ±0.01870     | 0.9999 | EXP 150 of 150         | 652.97546 ±0.03271     |

| r2     | Regression<br>(type,n) |            |
|--------|------------------------|------------|
| 0.9999 | EXP                    | 149 of 150 |
| 0.9999 | EXP                    | 150 of 150 |
| 0.9999 | EXP                    | 150 of 150 |
| 1.0000 | EXP                    | 150 of 150 |
| 1.0000 | EXP                    | 150 of 150 |
| 1.0000 | EXP                    | 150 of 150 |
| 1.0000 | EXP                    | 149 of 150 |
| 1.0000 | EXP                    | 150 of 150 |
| 1.0000 | EXP                    | 150 of 150 |
| 0.9999 | EXP                    | 150 of 150 |
| 1.0000 | EXP                    | 150 of 150 |
| 1.0000 | EXP                    | 148 of 150 |
| 1.0000 | EXP                    | 150 of 150 |
| 1.0000 | EXP                    | 150 of 150 |
| 1.0000 | EXP                    | 150 of 150 |
| 1.0000 | EXP                    | 149 of 150 |
| 1.0000 | EXP                    | 150 of 150 |
| 1.0000 | EXP                    | 150 of 150 |
| 1.0000 | EXP                    | 150 of 150 |
| 1.0000 | EXP                    | 150 of 150 |
| 0.9999 | EXP                    | 150 of 150 |
| 1.0000 | EXP                    | 150 of 150 |
| 1.0000 | EXP                    | 148 of 150 |
| 1.0000 | EXP                    | 150 of 150 |
| 1.0000 | EXP                    | 150 of 150 |
| 1.0000 | EXP                    | 150 of 150 |
| 0.9999 | EXP                    | 148 of 150 |
| 1.0000 | EXP                    | 148 of 150 |
| 0.9999 | EXP                    | 145 of 150 |
| 0.9999 | EXP                    | 148 of 150 |
| 1.0000 | EXP                    | 147 of 150 |



| Project Info |        | Analyst     | Irradiation | X-pos | Y-pos | Z/H-pos | Project                | Experiment | Nmb |
|--------------|--------|-------------|-------------|-------|-------|---------|------------------------|------------|-----|
| 20F04431     | 17.0 % | Dan Miggins | 19-OSU-02   | 0.00  | 0.00  | 42.59   | Oregon\Swenton (18-58) | 20F04426   | 01  |
| 20F04432     | 17.0 % | Dan Miggins | 19-OSU-02   | 0.00  | 0.00  | 42.59   | Oregon\Swenton (18-58) | 20F04426   | 01  |
| 20F04434     | 17.0 % | Dan Miggins | 19-OSU-02   | 0.00  | 0.00  | 42.59   | Oregon\Swenton (18-58) | 20F04426   | 01  |
| 20F04435     | 17.0 % | Dan Miggins | 19-OSU-02   | 0.00  | 0.00  | 42.59   | Oregon\Swenton (18-58) | 20F04426   | 01  |
| 20F04437     | 17.0 % | Dan Miggins | 19-OSU-02   | 0.00  | 0.00  | 42.59   | Oregon\Swenton (18-58) | 20F04426   | 01  |
| 20F04438     | 17.0 % | Dan Miggins | 19-OSU-02   | 0.00  | 0.00  | 42.59   | Oregon\Swenton (18-58) | 20F04426   | 01  |
| 20F04440     | 17.0 % | Dan Miggins | 19-OSU-02   | 0.00  | 0.00  | 42.59   | Oregon\Swenton (18-58) | 20F04426   | 01  |
| 20F04441     | 17.0 % | Dan Miggins | 19-OSU-02   | 0.00  | 0.00  | 42.59   | Oregon\Swenton (18-58) | 20F04426   | 01  |
| 20F04443     | 17.0 % | Dan Miggins | 19-OSU-02   | 0.00  | 0.00  | 42.59   | Oregon\Swenton (18-58) | 20F04426   | 01  |
| 20F04444     | 17.0 % | Dan Miggins | 19-OSU-02   | 0.00  | 0.00  | 42.59   | Oregon\Swenton (18-58) | 20F04426   | 01  |
| 20F04446     | 17.0 % | Dan Miggins | 19-OSU-02   | 0.00  | 0.00  | 42.59   | Oregon\Swenton (18-58) | 20F04426   | 01  |
| 20F04447     | 17.0 % | Dan Miggins | 19-OSU-02   | 0.00  | 0.00  | 42.59   | Oregon\Swenton (18-58) | 20F04426   | 01  |
| 20F04449     | 17.0 % | Dan Miggins | 19-OSU-02   | 0.00  | 0.00  | 42.59   | Oregon\Swenton (18-58) | 20F04426   | 01  |
| 20F04450     | 17.0 % | Dan Miggins | 19-OSU-02   | 0.00  | 0.00  | 42.59   | Oregon\Swenton (18-58) | 20F04426   | 01  |
| 20F04452     | 17.0 % | Dan Miggins | 19-OSU-02   | 0.00  | 0.00  | 42.59   | Oregon\Swenton (18-58) | 20F04426   | 01  |
| 20F04453     | 17.0 % | Dan Miggins | 19-OSU-02   | 0.00  | 0.00  | 42.59   | Oregon\Swenton (18-58) | 20F04426   | 01  |
| 20F04455     | 17.0 % | Dan Miggins | 19-OSU-02   | 0.00  | 0.00  | 42.59   | Oregon\Swenton (18-58) | 20F04426   | 01  |
| 20F04456     | 17.0 % | Dan Miggins | 19-OSU-02   | 0.00  | 0.00  | 42.59   | Oregon\Swenton (18-58) | 20F04426   | 01  |
| 20F04458     | 17.0 % | Dan Miggins | 19-OSU-02   | 0.00  | 0.00  | 42.59   | Oregon\Swenton (18-58) | 20F04426   | 01  |
| 20F04459     | 17.0 % | Dan Miggins | 19-OSU-02   | 0.00  | 0.00  | 42.59   | Oregon\Swenton (18-58) | 20F04426   | 01  |
| 20F04461     | 17.0 % | Dan Miggins | 19-OSU-02   | 0.00  | 0.00  | 42.59   | Oregon\Swenton (18-58) | 20F04426   | 01  |
| 20F04462     | 17.0 % | Dan Miggins | 19-OSU-02   | 0.00  | 0.00  | 42.59   | Oregon\Swenton (18-58) | 20F04426   | 01  |
| 20F04464     | 17.0 % | Dan Miggins | 19-OSU-02   | 0.00  | 0.00  | 42.59   | Oregon\Swenton (18-58) | 20F04426   | 01  |
| 20F04465     | 17.0 % | Dan Miggins | 19-OSU-02   | 0.00  | 0.00  | 42.59   | Oregon\Swenton (18-58) | 20F04426   | 01  |
| 20F04467     | 17.0 % | Dan Miggins | 19-OSU-02   | 0.00  | 0.00  | 42.59   | Oregon\Swenton (18-58) | 20F04426   | 01  |
| 20F04468     | 17.0 % | Dan Miggins | 19-OSU-02   | 0.00  | 0.00  | 42.59   | Oregon\Swenton (18-58) | 20F04426   | 01  |
| 20F04470     | 17.0 % | Dan Miggins | 19-OSU-02   | 0.00  | 0.00  | 42.59   | Oregon\Swenton (18-58) | 20F04426   | 01  |
| 20F04471     | 17.0 % | Dan Miggins | 19-OSU-02   | 0.00  | 0.00  | 42.59   | Oregon\Swenton (18-58) | 20F04426   | 01  |
| 20F04473     | 17.0 % | Dan Miggins | 19-OSU-02   | 0.00  | 0.00  | 42.59   | Oregon\Swenton (18-58) | 20F04426   | 01  |
| 20F04474     | 17.0 % | Dan Miggins | 19-OSU-02   | 0.00  | 0.00  | 42.59   | Oregon\Swenton (18-58) | 20F04426   | 01  |

| Sample Parameters |        | Sample   | Material | Location     | Standard Name    | Standard (in Ma) | %1σ   | Standard Reference  | Standard 40Ar/39Ar | %1σ   | J          | %1σ   | Air 40Ar/36Ar | %1σ   | MDF (lin) | %1σ   | Volume Ratio | Sensitivity (mol/volt) | Day | Month | Year | Hour | Min | Resist |
|-------------------|--------|----------|----------|--------------|------------------|------------------|-------|---------------------|--------------------|-------|------------|-------|---------------|-------|-----------|-------|--------------|------------------------|-----|-------|------|------|-----|--------|
| 20F04431          | 17.0 % | VS17-043 | Sanidine | Saddle Butte | FCT-NM (2C34-19) | 28.201           | 0.082 | Kuiper et al (2008) | 9.72951            | 0.243 | 0.00159571 | 0.243 | 299.217       | 0.125 | 0.9994504 | 0.041 | 1            | 3.54E-14               | 31  | MAR   | 2020 | 13   | 16  | 1      |
| 20F04432          | 17.0 % | VS17-043 | Sanidine | Saddle Butte | FCT-NM (2C34-19) | 28.201           | 0.082 | Kuiper et al (2008) | 9.72951            | 0.243 | 0.00159571 | 0.243 | 299.217       | 0.125 | 0.9994504 | 0.041 | 1            | 3.54E-14               | 31  | MAR   | 2020 | 13   | 25  | 1      |
| 20F04434          | 17.0 % | VS17-043 | Sanidine | Saddle Butte | FCT-NM (2C34-19) | 28.201           | 0.082 | Kuiper et al (2008) | 9.72951            | 0.243 | 0.00159571 | 0.243 | 299.217       | 0.125 | 0.9994504 | 0.041 | 1            | 3.54E-14               | 31  | MAR   | 2020 | 13   | 42  | 1      |
| 20F04435          | 17.0 % | VS17-043 | Sanidine | Saddle Butte | FCT-NM (2C34-19) | 28.201           | 0.082 | Kuiper et al (2008) | 9.72951            | 0.243 | 0.00159571 | 0.243 | 299.217       | 0.125 | 0.9994504 | 0.041 | 1            | 3.54E-14               | 31  | MAR   | 2020 | 13   | 51  | 1      |
| 20F04437          | 17.0 % | VS17-043 | Sanidine | Saddle Butte | FCT-NM (2C34-19) | 28.201           | 0.082 | Kuiper et al (2008) | 9.72951            | 0.243 | 0.00159571 | 0.243 | 299.217       | 0.125 | 0.9994504 | 0.041 | 1            | 3.54E-14               | 31  | MAR   | 2020 | 14   | 8   | 1      |
| 20F04438          | 17.0 % | VS17-043 | Sanidine | Saddle Butte | FCT-NM (2C34-19) | 28.201           | 0.082 | Kuiper et al (2008) | 9.72951            | 0.243 | 0.00159571 | 0.243 | 299.217       | 0.125 | 0.9994504 | 0.041 | 1            | 3.54E-14               | 31  | MAR   | 2020 | 14   | 16  | 1      |
| 20F04440          | 17.0 % | VS17-043 | Sanidine | Saddle Butte | FCT-NM (2C34-19) | 28.201           | 0.082 | Kuiper et al (2008) | 9.72951            | 0.243 | 0.00159571 | 0.243 | 299.217       | 0.125 | 0.9994504 | 0.041 | 1            | 3.54E-14               | 31  | MAR   | 2020 | 14   | 34  | 1      |
| 20F04441          | 17.0 % | VS17-043 | Sanidine | Saddle Butte | FCT-NM (2C34-19) | 28.201           | 0.082 | Kuiper et al (2008) | 9.72951            | 0.243 | 0.00159571 | 0.243 | 299.217       | 0.125 | 0.9994504 | 0.041 | 1            | 3.54E-14               | 31  | MAR   | 2020 | 14   | 42  | 1      |
| 20F04443          | 17.0 % | VS17-043 | Sanidine | Saddle Butte | FCT-NM (2C34-19) | 28.201           | 0.082 | Kuiper et al (2008) | 9.72951            | 0.243 | 0.00159571 | 0.243 | 299.217       | 0.125 | 0.9994504 | 0.041 | 1            | 3.54E-14               | 31  | MAR   | 2020 | 14   | 59  | 1      |
| 20F04444          | 17.0 % | VS17-043 | Sanidine | Saddle Butte | FCT-NM (2C34-19) | 28.201           | 0.082 | Kuiper et al (2008) | 9.72951            | 0.243 | 0.00159571 | 0.243 | 299.217       | 0.125 | 0.9994504 | 0.041 | 1            | 3.54E-14               | 31  | MAR   | 2020 | 15   | 8   | 1      |
| 20F04446          | 17.0 % | VS17-043 | Sanidine | Saddle Butte | FCT-NM (2C34-19) | 28.201           | 0.082 | Kuiper et al (2008) | 9.72951            | 0.243 | 0.00159571 | 0.243 | 299.217       | 0.125 | 0.9994504 | 0.041 | 1            | 3.54E-14               | 31  | MAR   | 2020 | 15   | 25  | 1      |
| 20F04447          | 17.0 % | VS17-043 | Sanidine | Saddle Butte | FCT-NM (2C34-19) | 28.201           | 0.082 | Kuiper et al (2008) | 9.72951            | 0.243 | 0.00159571 | 0.243 | 299.217       | 0.125 | 0.9994504 | 0.041 | 1            | 3.54E-14               | 31  | MAR   | 2020 | 15   | 34  | 1      |
| 20F04449          | 17.0 % | VS17-043 | Sanidine | Saddle Butte | FCT-NM (2C34-19) | 28.201           | 0.082 | Kuiper et al (2008) | 9.72951            | 0.243 | 0.00159571 | 0.243 | 299.217       | 0.125 | 0.9994504 | 0.041 | 1            | 3.54E-14               | 31  | MAR   | 2020 | 15   | 51  | 1      |
| 20F04450          | 17.0 % | VS17-043 | Sanidine | Saddle Butte | FCT-NM (2C34-19) | 28.201           | 0.082 | Kuiper et al (2008) | 9.72951            | 0.243 | 0.00159571 | 0.243 | 299.217       | 0.125 | 0.9994504 | 0.041 | 1            | 3.54E-14               | 31  | MAR   | 2020 | 15   | 59  | 1      |
| 20F04452          | 17.0 % | VS17-043 | Sanidine | Saddle Butte | FCT-NM (2C34-19) | 28.201           | 0.082 | Kuiper et al (2008) | 9.72951            | 0.243 | 0.00159571 | 0.243 | 299.217       | 0.125 | 0.9994504 | 0.041 | 1            | 3.54E-14               | 31  | MAR   | 2020 | 16   | 16  | 1      |
| 20F04453          | 17.0 % | VS17-043 | Sanidine | Saddle Butte | FCT-NM (2C34-19) | 28.201           | 0.082 | Kuiper et al (2008) | 9.72951            | 0.243 | 0.00159571 | 0.243 | 299.217       | 0.125 | 0.9994504 | 0.041 | 1            | 3.54E-14               | 31  | MAR   | 2020 | 16   | 25  | 1      |
| 20F04455          | 17.0 % | VS17-043 | Sanidine | Saddle Butte | FCT-NM (2C34-19) | 28.201           | 0.082 | Kuiper et al (2008) | 9.72951            | 0.243 | 0.00159571 | 0.243 | 299.217       | 0.125 | 0.9994504 | 0.041 | 1            | 3.54E-14               | 31  | MAR   | 2020 | 16   | 42  | 1      |
| 20F04456          | 17.0 % | VS17-043 | Sanidine | Saddle Butte | FCT-NM (2C34-19) | 28.201           | 0.082 | Kuiper et al (2008) | 9.72951            | 0.243 | 0.00159571 | 0.243 | 299.217       | 0.125 | 0.9994504 | 0.041 | 1            | 3.54E-14               | 31  | MAR   | 2020 | 16   | 51  | 1      |
| 20F04458          | 17.0 % | VS17-043 | Sanidine | Saddle Butte | FCT-NM (2C34-19) | 28.201           | 0.082 | Kuiper et al (2008) | 9.72951            | 0.243 | 0.00159571 | 0.243 | 299.217       | 0.125 | 0.9994504 | 0.041 | 1            | 3.54E-14               | 31  | MAR   | 2020 | 17   | 8   | 1      |
| 20F04459          | 17.0 % | VS17-043 | Sanidine | Saddle Butte | FCT-NM (2C34-19) | 28.201           | 0.082 | Kuiper et al (2008) | 9.72951            | 0.243 | 0.00159571 | 0.243 | 299.217       | 0.125 | 0.9994504 | 0.041 | 1            | 3.54E-14               | 31  | MAR   | 2020 | 17   | 16  | 1      |
| 20F04461          | 17.0 % | VS17-043 | Sanidine | Saddle Butte | FCT-NM (2C34-19) | 28.201           | 0.082 | Kuiper et al (2008) | 9.72951            | 0.243 | 0.00159571 | 0.243 | 299.217       | 0.125 | 0.9994504 | 0.041 | 1            | 3.54E-14               | 31  | MAR   | 2020 | 17   | 33  | 1      |
| 20F04462          | 17.0 % | VS17-043 | Sanidine | Saddle Butte | FCT-NM (2C34-19) | 28.201           | 0.082 | Kuiper et al (2008) | 9.72951            | 0.243 | 0.00159571 | 0.243 | 299.217       | 0.125 | 0.9994504 | 0.041 | 1            | 3.54E-14               | 31  | MAR   | 2020 | 17   | 42  | 1      |
| 20F04464          | 17.0 % | VS17-043 | Sanidine | Saddle Butte | FCT-NM (2C34-19) | 28.201           | 0.082 | Kuiper et al (2008) | 9.72951            | 0.243 | 0.00159571 | 0.243 | 299.217       | 0.125 | 0.9994504 | 0.041 | 1            | 3.54E-14               | 31  | MAR   | 2020 | 17   | 59  | 1      |
| 20F04465          | 17.0 % | VS17-043 | Sanidine | Saddle Butte | FCT-NM (2C34-19) | 28.201           | 0.082 | Kuiper et al (2008) | 9.72951            | 0.243 | 0.00159571 | 0.243 | 299.217       | 0.125 | 0.9994504 | 0.041 | 1            | 3.54E-14               | 31  | MAR   | 2020 | 18   | 8   | 1      |
| 20F04467          | 17.0 % | VS17-043 | Sanidine | Saddle Butte | FCT-NM (2C34-19) | 28.201           | 0.082 | Kuiper et al (2008) | 9.72951            | 0.243 | 0.00159571 | 0.243 | 299.217       | 0.125 | 0.9994504 | 0.041 | 1            | 3.54E-14               | 31  | MAR   | 2020 | 18   | 25  | 1      |
| 20F04468          | 17.0 % | VS17-043 | Sanidine | Saddle Butte | FCT-NM (2C34-19) | 28.201           | 0.082 | Kuiper et al (2008) | 9.72951            | 0.243 | 0.00159571 | 0.243 | 299.217       | 0.125 | 0.9994504 | 0.041 | 1            | 3.54E-14               | 31  | MAR   | 2020 | 18   | 33  | 1      |
| 20F04470          | 17.0 % | VS17-043 | Sanidine | Saddle Butte | FCT-NM (2C34-19) | 28.201           | 0.082 | Kuiper et al (2008) | 9.72951            | 0.243 | 0.00159571 | 0.243 | 299.217       | 0.125 | 0.9994504 | 0.041 | 1            | 3.54E-14               | 31  | MAR   | 2020 | 18   | 51  | 1      |
| 20F04471          | 17.0 % | VS17-043 | Sanidine | Saddle Butte | FCT-NM (2C34-19) | 28.201           | 0.082 | Kuiper et al (2008) | 9.72951            | 0.243 | 0.00159571 | 0.243 | 299.217       | 0.125 | 0.9994504 | 0.041 | 1            | 3.54E-14               | 31  | MAR   | 2020 | 18   | 59  | 1      |
| 20F04473          | 17.0 % | VS17-043 | Sanidine | Saddle Butte | FCT-NM (2C34-19) | 28.201           | 0.082 | Kuiper et al (2008) | 9.72951            | 0.243 | 0.00159571 | 0.243 | 299.217       | 0.125 | 0.9994504 | 0.041 | 1            | 3.54E-14               | 31  | MAR   | 2020 | 19   | 16  | 1      |
| 20F04474          | 17.0 % | VS17-043 | Sanidine | Saddle Butte | FCT-NM (2C34-19) | 28.201           | 0.082 | Kuiper et al (2008) | 9.72951            | 0.243 | 0.00159571 | 0.243 | 299.217       | 0.125 | 0.9994504 | 0.041 | 1            | 3.54E-14               | 31  | MAR   | 2020 | 19   | 25  | 1      |



20F04426.AGE >>> VS17-043 >>> OREGON | SWENTON (18-58) PROJECT

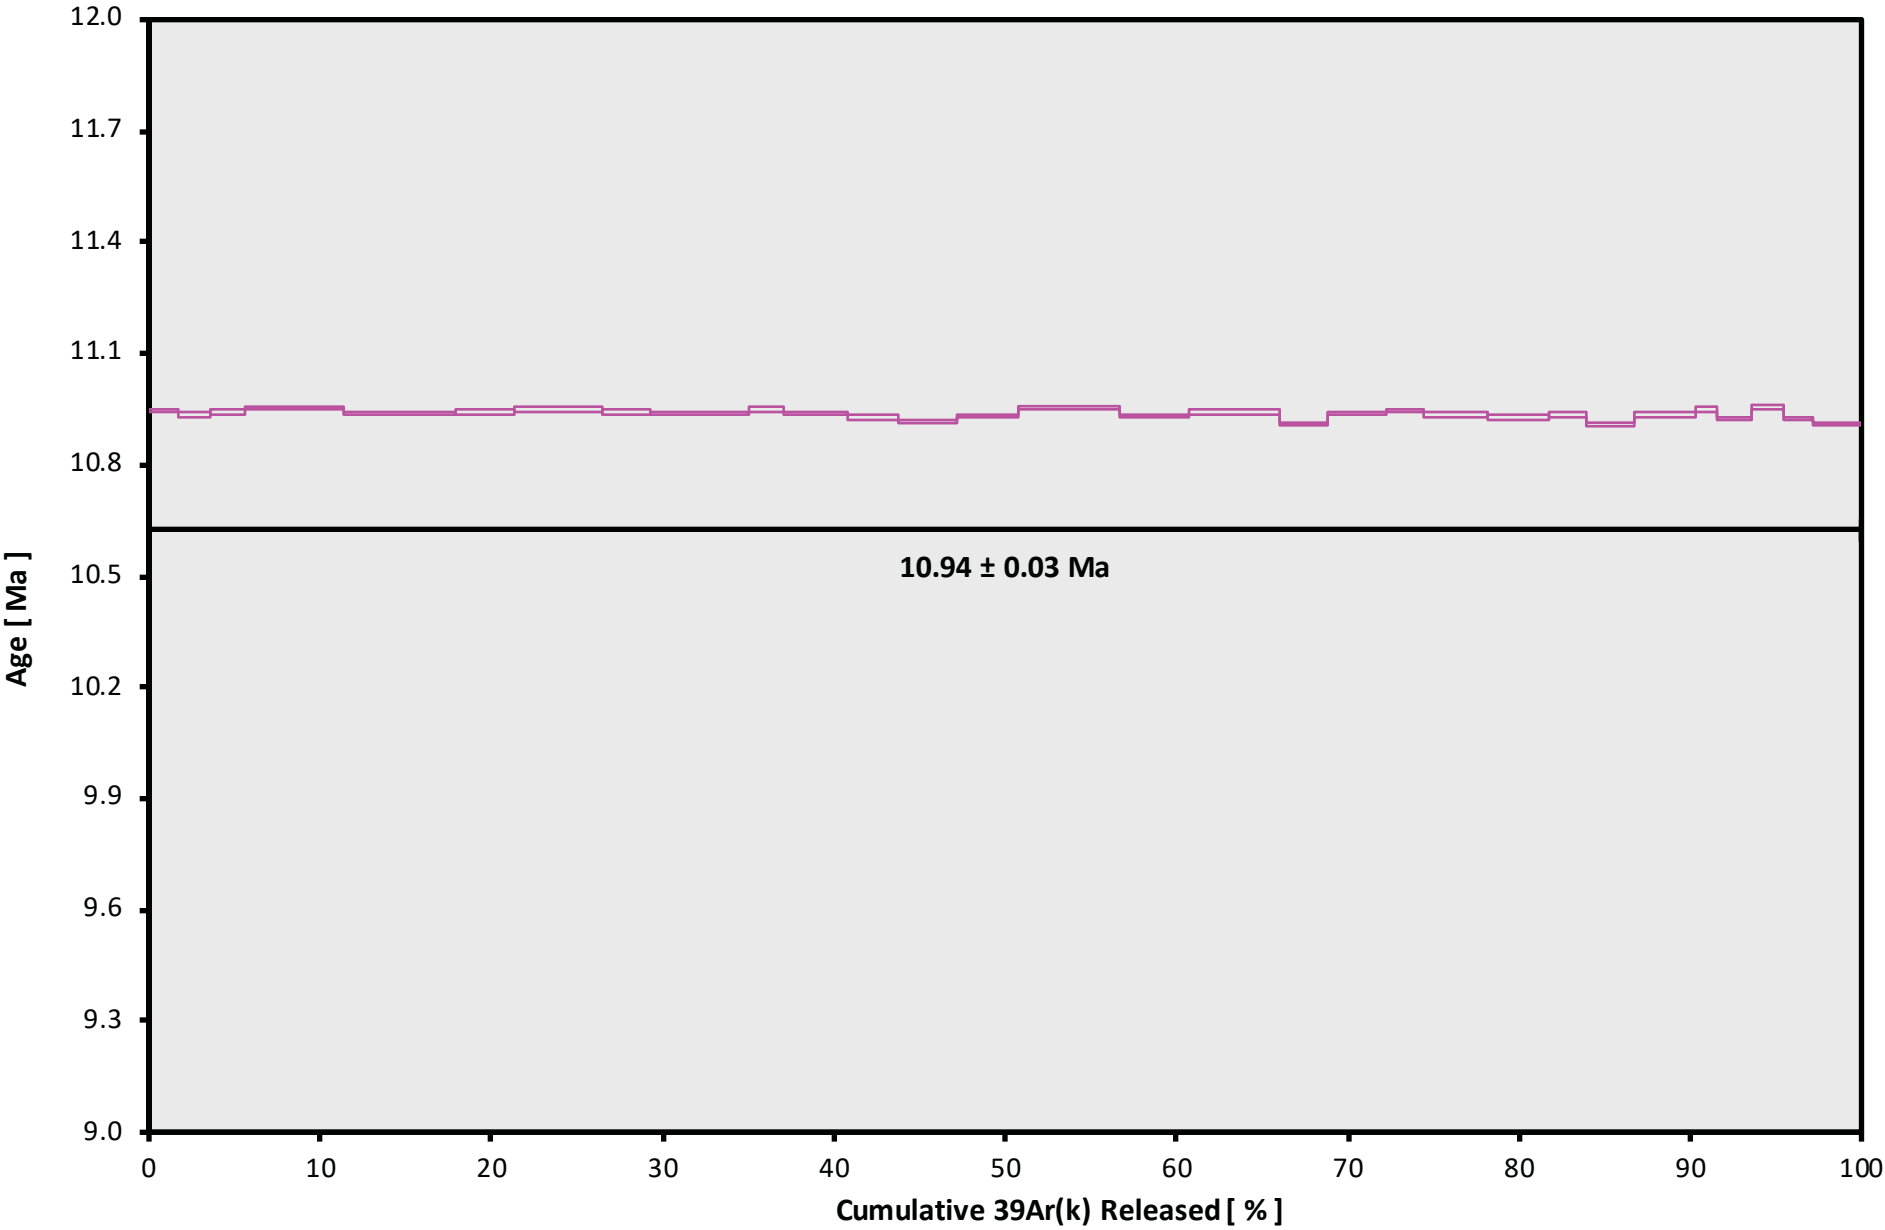

Ar-Ages in Ma

WEIGHTED PLATEAU

10.94 ± 0.03

TOTAL FUSION

10.94 ± 0.03

NORMAL ISOCHRON

10.93 ± 0.03

INVERSE ISOCHRON

10.93 ± 0.03

MSWD (PROBABILITY)

6.52 (0%)

Sample Info

Sanidine

Saddle Butte

Dan Miggins

IRR = 19-OSU-02 (2C34-

20F04426.AGE >>> VS17-043 >>> OREGON | SWENTON (18-58) PROJECT

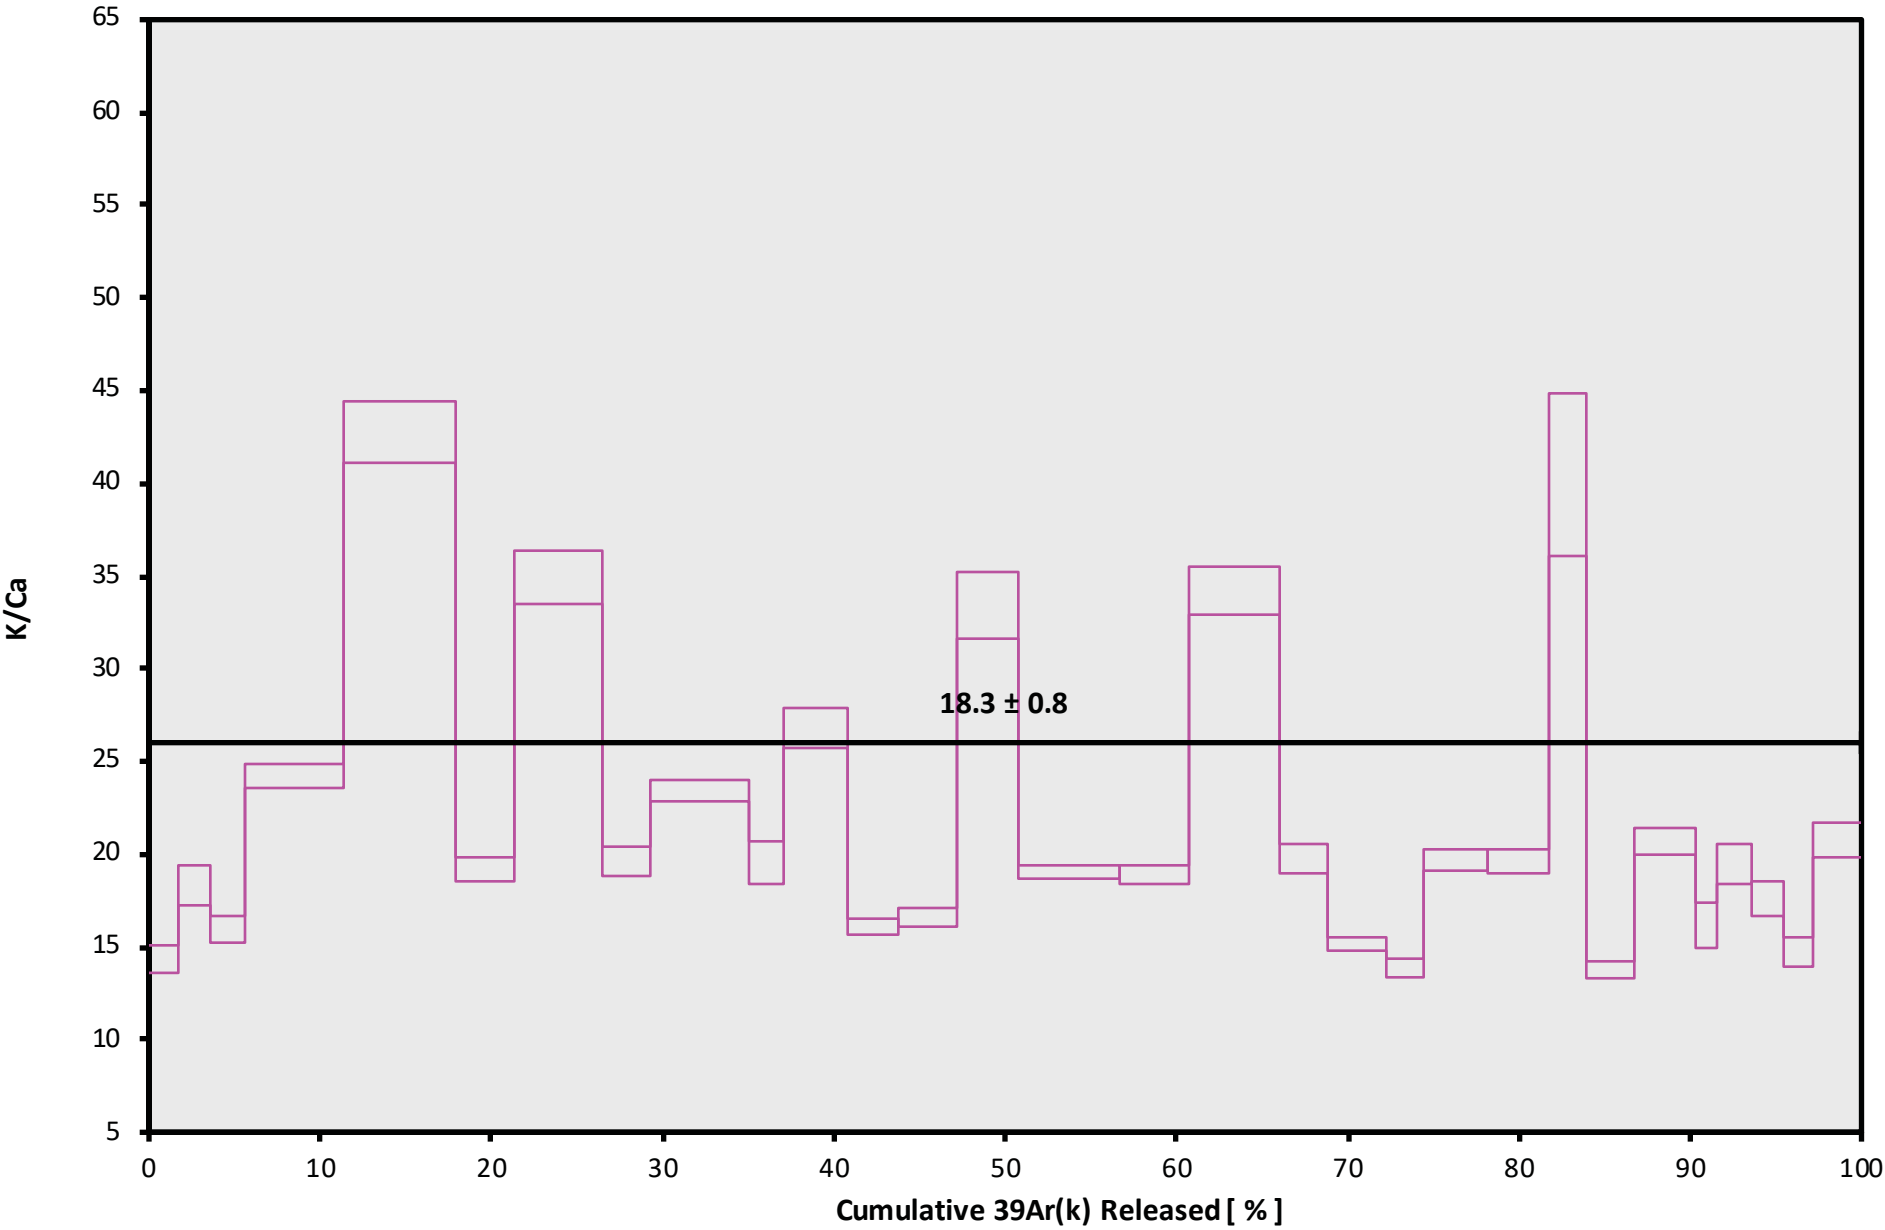

Ar-Ages in Ma

WEIGHTED PLATEAU

$10.94 \pm 0.03$

TOTAL FUSION

$10.94 \pm 0.03$

NORMAL ISOCHRON

$10.93 \pm 0.03$

INVERSE ISOCHRON

$10.93 \pm 0.03$

Sample Info

Sanidine

Saddle Butte

Dan Miggins

IRR = 19-OSU-02 (2C34-

20F04426.AGE >>> VS17-043 >>> OREGON | SWENTON (18-58) PROJECT

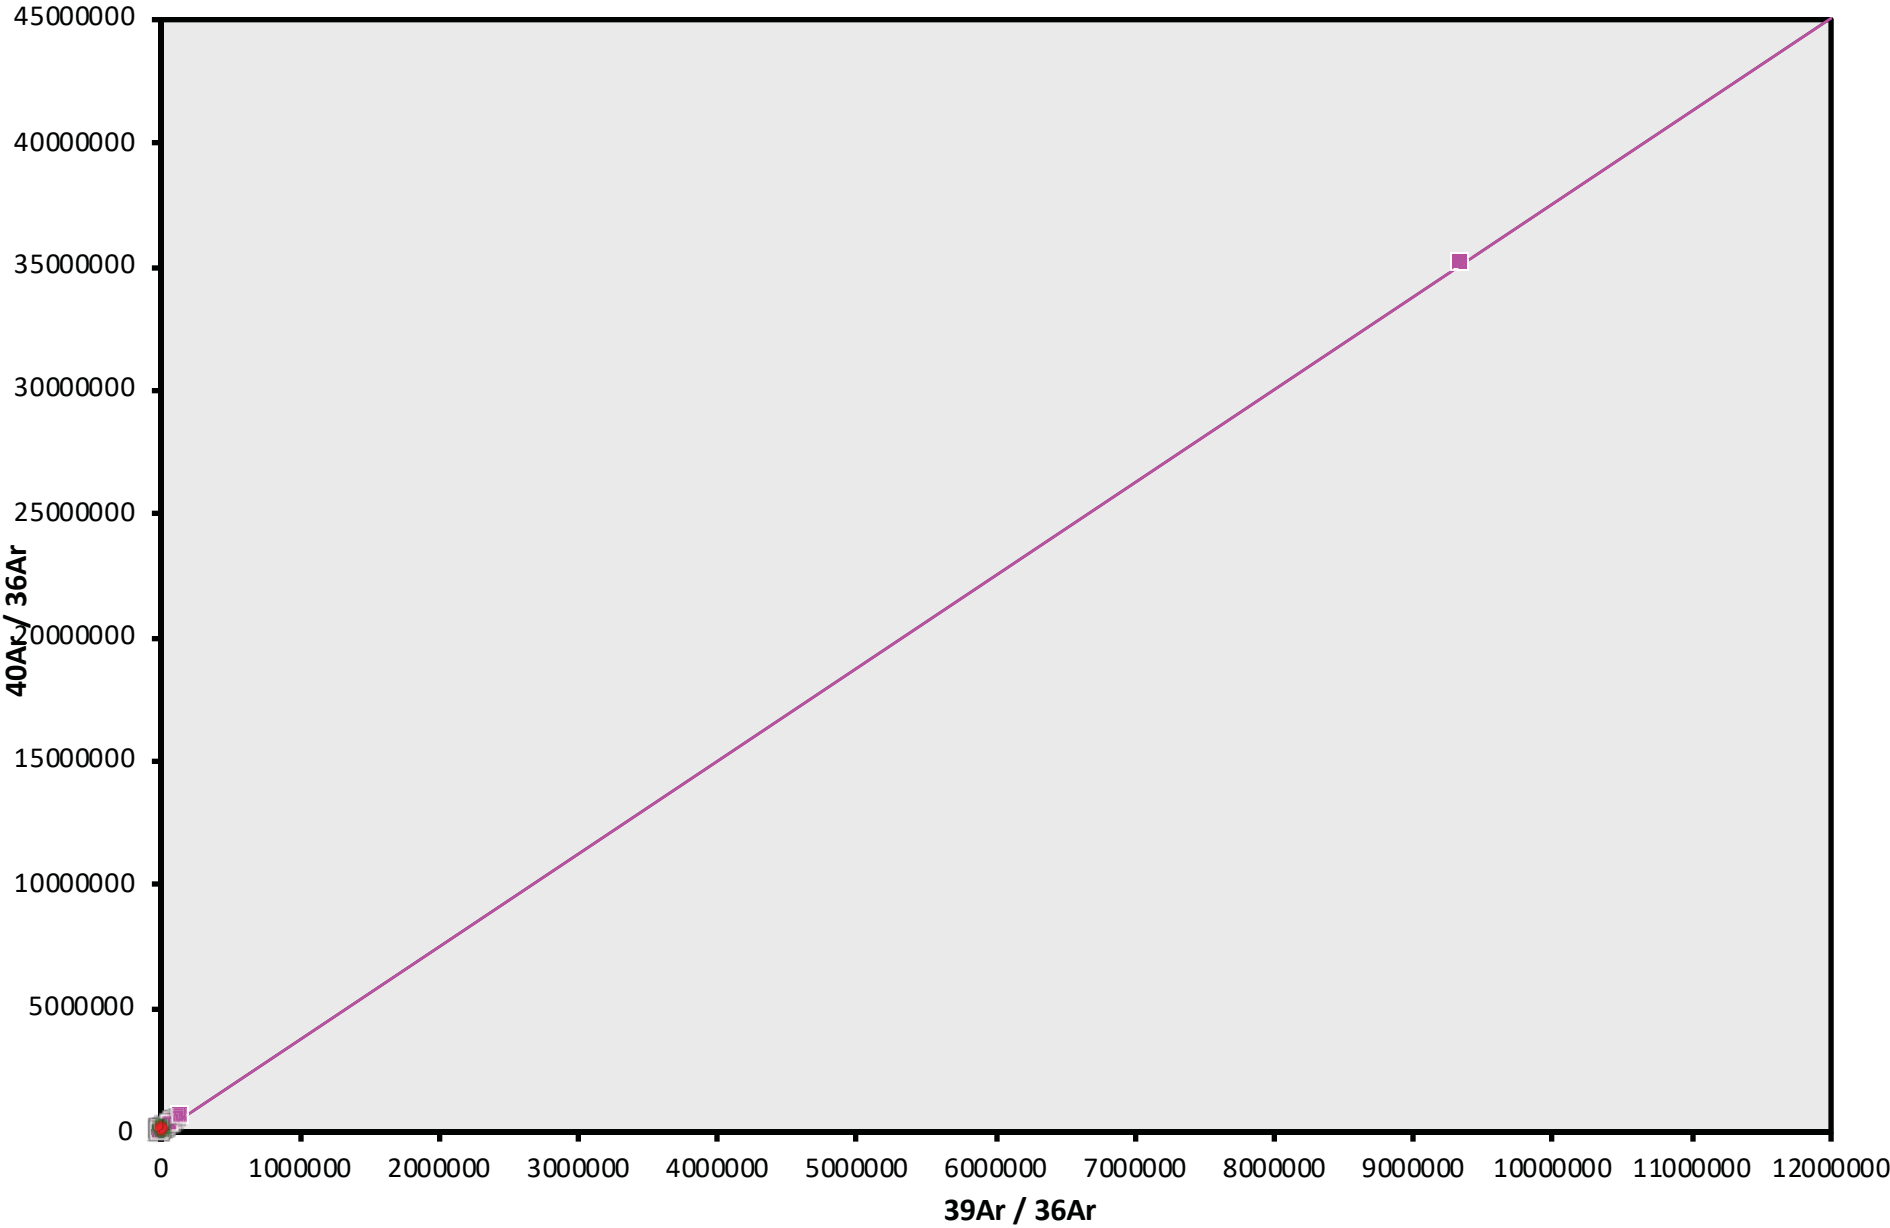

Ar-Ages in Ma

WEIGHTED PLATEAU

$10.94 \pm 0.03$

TOTAL FUSION

$10.94 \pm 0.03$

NORMAL ISOCHRON

$10.93 \pm 0.03$

INVERSE ISOCHRON

$10.93 \pm 0.03$

MSWD (PROBABILITY)

5.99 (0%)

40AR/36AR INTERCEPT

Sample Info

Sanidine

Saddle Butte

Dan Miggins

IRR = 19-OSU-02 (2C34-19)

20F04426.AGE >>> VS17-043 >>> OREGON | SWENTON (18-58) PROJECT

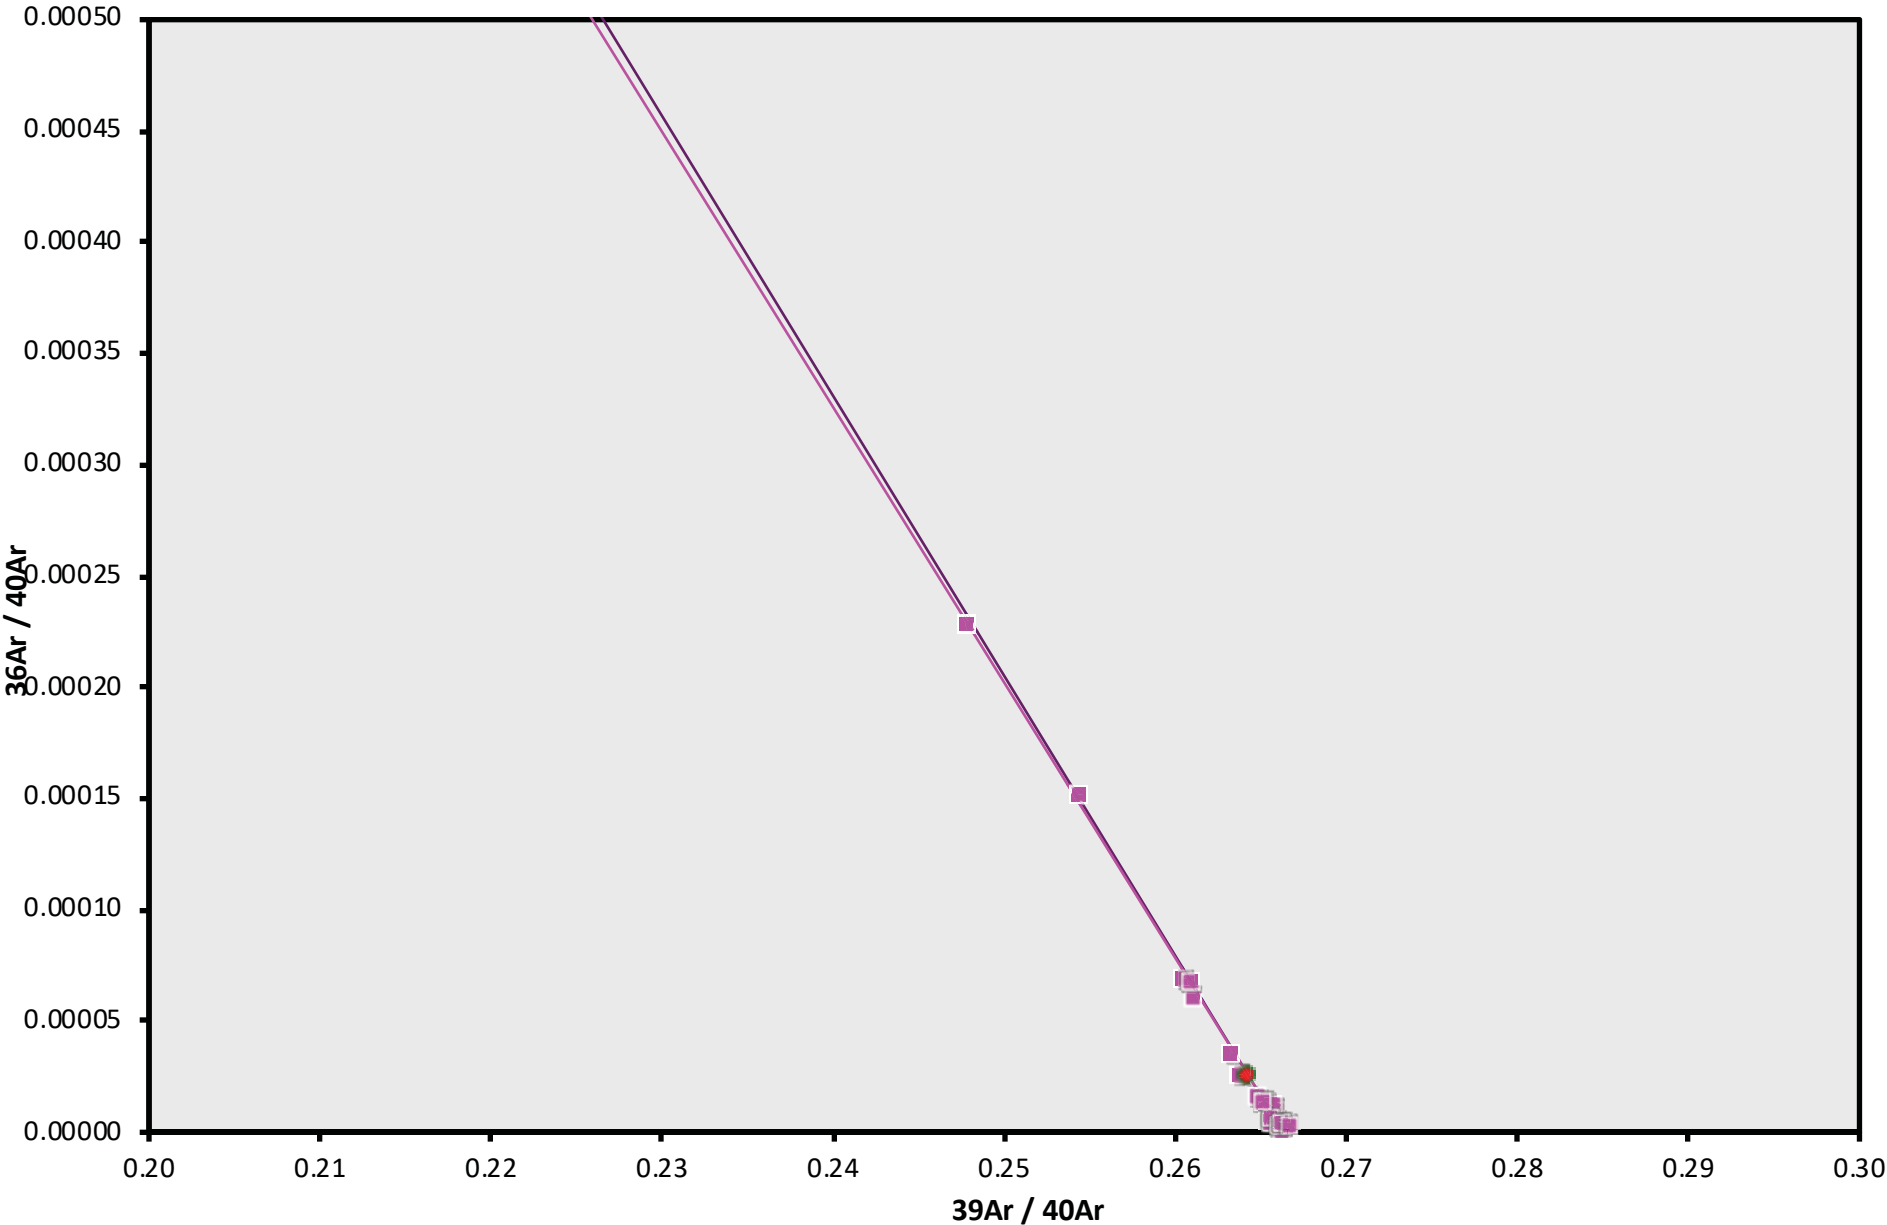

Ar-Ages in Ma

WEIGHTED PLATEAU

10.94 ± 0.03

TOTAL FUSION

10.94 ± 0.03

NORMAL ISOCHRON

10.93 ± 0.03

INVERSE ISOCHRON

10.93 ± 0.03

MSWD (PROBABILITY)

6.54 (0%)

SPREADING FACTOR

Sample Info

Sanidine

Saddle Butte

Dan Miggins

IRR = 19-OSU-02 (2C34-

| Relative Abundances |        |   | 36Ar<br>[fA] | %1σ     | 37Ar<br>[fA] | %1σ    | 38Ar<br>[fA] | %1σ   | 39Ar<br>[fA] | %1σ   | 40Ar<br>[fA] | %1σ   | 40(r)/39(k) ± 2σ | Age ± 2σ<br>(Ma) | 40Ar(r)<br>(%) | 39Ar(k)<br>(%) | K/Ca ± 2σ  |
|---------------------|--------|---|--------------|---------|--------------|--------|--------------|-------|--------------|-------|--------------|-------|------------------|------------------|----------------|----------------|------------|
| 20F04482            | 17.0 % | ✓ | 0.0956277    | 0.596   | 1.525865     | 10.398 | 1.401668     | 0.645 | 114.8803     | 0.042 | 497.951      | 0.008 | 4.08649 ±0.00465 | 11.84 ±0.01      | 94.28          | 2.73           | 32.4 ±6.7  |
| 20F04483            | 17.0 % | ✓ | 0.0032742    | 9.775   | 1.968544     | 7.921  | 1.626116     | 0.544 | 134.5017     | 0.042 | 550.143      | 0.006 | 4.08357 ±0.00377 | 11.84 ±0.01      | 99.84          | 3.20           | 29.4 ±4.7  |
| 20F04485            | 17.0 % | ✓ | 0.0040821    | 7.099   | 0.904327     | 17.762 | 0.937066     | 0.955 | 77.2185      | 0.044 | 316.811      | 0.011 | 4.08737 ±0.00435 | 11.85 ±0.01      | 99.62          | 1.84           | 36.7 ±13.0 |
| 20F04486            | 17.0 % | ✓ | 0.0020377    | 14.348  | 1.986377     | 7.835  | 1.612337     | 0.576 | 135.1343     | 0.042 | 553.256      | 0.006 | 4.09024 ±0.00372 | 11.86 ±0.01      | 99.90          | 3.21           | 29.3 ±4.6  |
| 20F04488            | 17.0 % | ✓ | 0.0758877    | 0.746   | 2.244290     | 7.254  | 1.907930     | 0.493 | 159.6338     | 0.042 | 674.930      | 0.005 | 4.08662 ±0.00407 | 11.84 ±0.01      | 96.66          | 3.80           | 30.6 ±4.4  |
| 20F04489            | 17.0 % | ✓ | 0.0021846    | 14.755  | 1.914488     | 8.079  | 1.546782     | 0.633 | 129.7476     | 0.042 | 530.267      | 0.006 | 4.08251 ±0.00381 | 11.83 ±0.01      | 99.89          | 3.08           | 29.1 ±4.7  |
| 20F04491            | 17.0 % | ✓ | 0.0043901    | 7.646   | 2.445187     | 6.310  | 1.710064     | 0.571 | 144.1174     | 0.042 | 590.133      | 0.007 | 4.08652 ±0.00378 | 11.84 ±0.01      | 99.80          | 3.43           | 25.3 ±3.2  |
| 20F04492            | 17.0 % | ✓ | 0.0082659    | 4.489   | 3.465628     | 4.367  | 2.680311     | 0.359 | 224.9449     | 0.042 | 921.285      | 0.005 | 4.08531 ±0.00357 | 11.84 ±0.01      | 99.75          | 5.35           | 27.9 ±2.4  |
| 20F04494            | 17.0 % | ✓ | 0.0275589    | 1.583   | 3.373769     | 4.661  | 2.591037     | 0.395 | 216.8939     | 0.042 | 894.536      | 0.005 | 4.08705 ±0.00363 | 11.85 ±0.01      | 99.10          | 5.16           | 27.6 ±2.6  |
| 20F04495            | 17.0 % | ✓ | 0.1197521    | 0.534   | 4.341814     | 3.389  | 3.771631     | 0.270 | 311.9342     | 0.041 | 1311.330     | 0.004 | 4.08980 ±0.00361 | 11.85 ±0.01      | 97.29          | 7.42           | 30.9 ±2.1  |
| 20F04497            | 17.0 % | ✓ | 0.0073066    | 4.345   | 1.331611     | 12.322 | 0.941798     | 1.022 | 79.1985      | 0.044 | 325.948      | 0.009 | 4.08884 ±0.00442 | 11.85 ±0.01      | 99.35          | 1.88           | 25.6 ±6.3  |
| 20F04498            | 17.0 % | ✓ | 0.0066869    | 5.035   | 1.616149     | 10.033 | 1.166075     | 0.813 | 97.6111      | 0.043 | 400.691      | 0.008 | 4.08529 ±0.00416 | 11.84 ±0.01      | 99.52          | 2.32           | 26.0 ±5.2  |
| 20F04500            | 17.0 % | ✓ | 0.0075007    | 4.409   | 1.093585     | 13.396 | 0.976012     | 0.982 | 81.5285      | 0.044 | 335.704      | 0.010 | 4.09067 ±0.00440 | 11.86 ±0.01      | 99.34          | 1.94           | 32.1 ±8.6  |
| 20F04501            | 17.0 % | ✓ | 0.0016638    | 19.597  | 2.248050     | 6.944  | 1.972583     | 0.424 | 164.9049     | 0.042 | 673.966      | 0.006 | 4.08452 ±0.00366 | 11.84 ±0.01      | 99.94          | 3.92           | 31.5 ±4.4  |
| 20F04503            | 17.0 % | ✓ | 0.0094290    | 3.842   | 2.048896     | 6.916  | 1.710218     | 0.557 | 142.7037     | 0.042 | 585.917      | 0.007 | 4.08669 ±0.00382 | 11.85 ±0.01      | 99.53          | 3.39           | 29.9 ±4.1  |
| 20F04504            | 17.0 % | ✓ | 0.0408864    | 1.089   | 2.984992     | 4.857  | 2.488652     | 0.384 | 207.1400     | 0.041 | 859.090      | 0.005 | 4.08905 ±0.00366 | 11.85 ±0.01      | 98.59          | 4.92           | 29.8 ±2.9  |
| 20F04506            | 17.0 % | ✓ | 0.0009154    | 35.234  | 1.671486     | 8.761  | 1.623839     | 0.594 | 135.0821     | 0.042 | 552.335      | 0.006 | 4.08728 ±0.00379 | 11.85 ±0.01      | 99.96          | 3.21           | 34.8 ±6.1  |
| 20F04507            | 17.0 % | ✓ | 0.1109097    | 0.499   | 1.956345     | 7.755  | 1.678596     | 0.555 | 137.7159     | 0.043 | 595.676      | 0.006 | 4.08553 ±0.00430 | 11.84 ±0.01      | 94.45          | 3.27           | 30.3 ±4.7  |
| 20F04509            | 17.0 % | ✓ | 0.0091703    | 3.872   | 2.961277     | 5.184  | 2.394117     | 0.410 | 201.4920     | 0.042 | 825.659      | 0.005 | 4.08476 ±0.00361 | 11.84 ±0.01      | 99.68          | 4.79           | 29.3 ±3.0  |
| 20F04510            | 17.0 % | ✓ | 0.0052167    | 6.267   | 2.530886     | 5.869  | 1.897726     | 0.512 | 157.8580     | 0.042 | 645.624      | 0.006 | 4.08076 ±0.00369 | 11.83 ±0.01      | 99.78          | 3.75           | 26.8 ±3.1  |
| 20F04512            | 17.0 % | ✓ | 0.0152961    | 2.394   | 1.255845     | 12.508 | 1.126952     | 0.873 | 99.9732      | 0.044 | 388.477      | 0.009 | 4.08582 ±0.00434 | 11.84 ±0.01      | 98.84          | 2.23           | 32.2 ±8.0  |
| 20F04513            | 17.0 % |   | 0.0000381    | 780.219 | 0.303875     | 47.018 | 0.196086     | 4.545 | 17.4446      | 0.071 | 71.892       | 0.033 | 4.12135 ±0.01213 | 11.95 ±0.04      | 100.00         | 0.41           | 24.7 ±23.2 |
| 20F04515            | 17.0 % | ✓ | 0.0045042    | 6.886   | 1.639066     | 10.310 | 1.380142     | 0.658 | 115.6007     | 0.043 | 473.344      | 0.008 | 4.08358 ±0.00392 | 11.84 ±0.01      | 99.73          | 2.75           | 30.3 ±6.3  |
| 20F04516            | 17.0 % | ✓ | 0.0019684    | 15.865  | 1.172588     | 13.395 | 1.010063     | 0.879 | 85.4019      | 0.044 | 349.943      | 0.008 | 4.09126 ±0.00425 | 11.86 ±0.01      | 99.84          | 2.03           | 31.3 ±8.4  |
| 20F04518            | 17.0 % | ✓ | 0.0105637    | 3.404   | 2.480259     | 5.827  | 2.298648     | 0.392 | 193.1628     | 0.042 | 791.829      | 0.006 | 4.08342 ±0.00362 | 11.84 ±0.01      | 99.61          | 4.59           | 33.5 ±3.9  |
| 20F04519            | 17.0 % |   | 0.7481121    | 0.235   | 3.068628     | 4.857  | 2.895421     | 0.333 | 228.8089     | 0.041 | 1163.679     | 0.005 | 4.11015 ±0.00609 | 11.91 ±0.02      | 80.82          | 5.44           | 32.1 ±3.1  |
| 20F04521            | 17.0 % | ✓ | 0.0125820    | 2.855   | 1.880404     | 7.483  | 1.352005     | 0.726 | 111.9733     | 0.043 | 460.641      | 0.007 | 4.08109 ±0.00403 | 11.83 ±0.01      | 99.20          | 2.66           | 25.6 ±3.8  |
| 20F04522            | 17.0 % | ✓ | 0.0018376    | 18.689  | 1.511791     | 9.180  | 1.218597     | 0.765 | 102.6971     | 0.043 | 420.588      | 0.008 | 4.09069 ±0.00412 | 11.86 ±0.01      | 99.88          | 2.44           | 29.2 ±5.4  |
| 20F04524            | 17.0 % | ✓ | 0.0113811    | 3.326   | 1.918264     | 7.992  | 1.654049     | 0.584 | 136.0851     | 0.042 | 558.872      | 0.006 | 4.08239 ±0.00386 | 11.83 ±0.01      | 99.41          | 3.24           | 30.5 ±4.9  |
| 20F04525            | 17.0 % | ✓ | 0.0011195    | 26.727  | 1.127067     | 14.165 | 0.813135     | 1.093 | 66.9139      | 0.045 | 273.609      | 0.011 | 4.08479 ±0.00466 | 11.84 ±0.01      | 99.90          | 1.59           | 25.5 ±7.2  |
| Σ                   |        |   | 1.3501494    | 0.201   | 60.971353    | 1.375  | 50.579658    | 0.102 | 4206.3027    | 0.008 | 17594.125    | 0.001 |                  |                  |                |                |            |

| Information on Analysis and Constants Used in Calculations |                                                        |
|------------------------------------------------------------|--------------------------------------------------------|
| Project = SWENTON (18-58)                                  | Age Equations = Min et al. (2000)                      |
| Sample = VS17-045                                          | Negative Intensities = Allowed                         |
| Material = Sanidine                                        | Collector Calibrations = 36Ar                          |
| Location = Iron Point                                      | Decay 40K = 5.463 ±0.107 E-10 1/a                      |
| Region = Eastern Oregon                                    | Decay 39Ar = 2.940 ±0.016 E-07 1/h                     |
| Analyst = Dan Miggins                                      | Decay 37Ar = 8.230 ±0.012 E-04 1/h                     |
| Irradiation = 19-OSU-02 (2C36-19)                          | Decay 36Cl = 2.257 ±0.015 E-06 1/a                     |
| Position = X: 0   Y: 0   Z/H: 44.78697 mm                  | Decay 40K(EC, β <sup>+</sup> ) = 0.580 ±0.014 E-10 1/a |
| FCT-NM Age = 28.201 ±0.023 Ma                              | Decay 40K(β <sup>-</sup> ) = 4.884 ±0.099 E-10 1/a     |
| FCT-NM Reference = Kuiper et al (2008)                     | Atmospheric 40/36(a) = 298.56 ±0.31                    |
| FCT-NM 40Ar/39Ar Ratio = 9.77337 ±0.02365                  | Atmospheric 38/36(a) = 0.1885 ±0.0003                  |
| FCT-NMJ-value = 0.00158855 ±0.00000384                     | Production 39/37(ca) = 0.0006425 ±0.0000059            |
| Air Shot 40Ar/36Ar = 299.1950 ±0.3740                      | Production 38/37(ca) = 0.0001800 ±0.0000173            |
| Air Shot MDF = 0.99946872 ±0.00040618 (LIN)                | Production 36/37(ca) = 0.0002703 ±0.0000005            |
| Experiment Type = Total Fusion                             | Production 40/39(k) = 0.000607 ±0.000059               |
| Extraction Method = Single Crystal Laser Heating           | Production 38/39(k) = 0.012077 ±0.000011               |
| Heating = 62 sec                                           | Production 36/38(cl) = 262.80 ±1.71                    |
| Isolation = 1.62 min                                       | Scaling Ratio K/Ca = 0.430                             |
| Instrument = ARGUS-VI-F                                    | Abundance Ratio 40K/K = 1.1700 ±0.0100 E-04            |
| Preferred Age = Ideogram Age                               | Atomic Weight K = 39.0983 ±0.0001 g                    |
| Age Classification = Eruption Age                          |                                                        |
| IGSN = Undefined                                           |                                                        |
| Rock Class = Undefined                                     |                                                        |
| Lithology = Undefined                                      |                                                        |
| Lat-Lon = Undefined - Undefined                            |                                                        |

| Results                         | 40(a)/36(a) ± 2σ       | 40(r)/39(k) ± 2σ                        | Age ± 2σ<br>(Ma)      | M\$WD             | 39Ar(k)<br>(%,n)                           | K/Ca ± 2σ |
|---------------------------------|------------------------|-----------------------------------------|-----------------------|-------------------|--------------------------------------------|-----------|
| Age Plateau<br>Error Mean       |                        | 4.08604 ±0.00110<br>±0.03%              | 11.84 ±0.06<br>±0.48% | 2.19<br>0%        | 94.15<br>28                                | 29.1 ±0.9 |
|                                 |                        | Full External Error<br>Analytical Error | ±0.62<br>±0.00        | 1.54<br>1.4802    | 2σ Confidence Limit<br>Error Magnification |           |
| Total Fusion Age                |                        | 4.08757 ±0.00080<br>±0.02%              | 11.85 ±0.06<br>±0.48% |                   | 30                                         | 29.7 ±0.8 |
|                                 |                        | Full External Error<br>Analytical Error | ±0.62<br>±0.00        |                   |                                            |           |
| Normal Isochron<br>Error Chron  | 297.82 ±5.86<br>±1.97% | 4.08687 ±0.00138<br>±0.03%              | 11.85 ±0.06<br>±0.48% | 2.48<br>0%        | 94.15<br>28                                |           |
|                                 |                        | Full External Error<br>Analytical Error | ±0.62<br>±0.00        | 1.55<br>1.5737    | 2σ Confidence Limit<br>Error Magnification |           |
|                                 |                        |                                         |                       | 1<br>0.0000000084 | Number of Iterations<br>Convergence        |           |
| Inverse Isochron<br>Error Chron | 300.48 ±5.57<br>±1.85% | 4.08581 ±0.00131<br>±0.03%              | 11.84 ±0.06<br>±0.48% | 2.24<br>0%        | 94.15<br>28                                |           |
|                                 |                        | Full External Error<br>Analytical Error | ±0.62<br>±0.00        | 1.55<br>1.4952    | 2σ Confidence Limit<br>Error Magnification |           |
|                                 |                        |                                         |                       | 2<br>0.0006992924 | Number of Iterations<br>Convergence        |           |
|                                 |                        |                                         |                       | 6%                | Spreading Factor                           |           |



| Incremental Heating |        |   | 36Ar(a)<br>[fA] | 37Ar(ca)<br>[fA] | 38Ar(cl)<br>[fA] | 39Ar(k)<br>[fA] | 40Ar(r)<br>[fA] | Age ± 2σ<br>(Ma) | 40Ar(r)<br>(%) | 39Ar(k)<br>(%) | K/Ca ± 2σ  |
|---------------------|--------|---|-----------------|------------------|------------------|-----------------|-----------------|------------------|----------------|----------------|------------|
| 20F04482            | 17.0 % | ✓ | 0.0952153       | 1.525865         | 0.0000000        | 114.8793        | 469.453         | 11.84 ±0.01      | 94.28          | 2.73           | 32.4 ±6.7  |
| 20F04483            | 17.0 % | ✓ | 0.0027419       | 1.968544         | 0.0008832        | 134.5004        | 549.242         | 11.84 ±0.01      | 99.84          | 3.20           | 29.4 ±4.7  |
| 20F04485            | 17.0 % | ✓ | 0.0038368       | 0.904327         | 0.0036199        | 77.2179         | 315.618         | 11.85 ±0.01      | 99.62          | 1.84           | 36.7 ±13.0 |
| 20F04486            | 17.0 % | ✓ | 0.0015008       | 1.986377         | 0.0000000        | 135.1330        | 552.726         | 11.86 ±0.01      | 99.90          | 3.21           | 29.3 ±4.6  |
| 20F04488            | 17.0 % | ✓ | 0.0752810       | 2.244290         | 0.0000000        | 159.6324        | 652.357         | 11.84 ±0.01      | 96.66          | 3.80           | 30.6 ±4.4  |
| 20F04489            | 17.0 % | ✓ | 0.0016671       | 1.914488         | 0.0000000        | 129.7463        | 529.691         | 11.83 ±0.01      | 99.89          | 3.08           | 29.1 ±4.7  |
| 20F04491            | 17.0 % | ✓ | 0.0037292       | 2.445187         | 0.0000000        | 144.1158        | 588.932         | 11.84 ±0.01      | 99.80          | 3.43           | 25.3 ±3.2  |
| 20F04492            | 17.0 % | ✓ | 0.0073291       | 3.465628         | 0.0000000        | 224.9427        | 918.960         | 11.84 ±0.01      | 99.75          | 5.35           | 27.9 ±2.4  |
| 20F04494            | 17.0 % | ✓ | 0.0266470       | 3.373769         | 0.0000000        | 216.8917        | 886.448         | 11.85 ±0.01      | 99.10          | 5.16           | 27.6 ±2.6  |
| 20F04495            | 17.0 % | ✓ | 0.1185785       | 4.341814         | 0.0000000        | 311.9314        | 1275.738        | 11.85 ±0.01      | 97.29          | 7.42           | 30.9 ±2.1  |
| 20F04497            | 17.0 % | ✓ | 0.0069467       | 1.331611         | 0.0000000        | 79.1976         | 323.826         | 11.85 ±0.01      | 99.35          | 1.88           | 25.6 ±6.3  |
| 20F04498            | 17.0 % | ✓ | 0.0062500       | 1.616149         | 0.0000000        | 97.6100         | 398.765         | 11.84 ±0.01      | 99.52          | 2.32           | 26.0 ±5.2  |
| 20F04500            | 17.0 % | ✓ | 0.0072052       | 1.093585         | 0.0000000        | 81.5278         | 333.504         | 11.86 ±0.01      | 99.34          | 1.94           | 32.1 ±8.6  |
| 20F04501            | 17.0 % | ✓ | 0.0010562       | 2.248050         | 0.0000000        | 164.9034        | 673.551         | 11.84 ±0.01      | 99.94          | 3.92           | 31.5 ±4.4  |
| 20F04503            | 17.0 % | ✓ | 0.0088751       | 2.048896         | 0.0000000        | 142.7024        | 583.180         | 11.85 ±0.01      | 99.53          | 3.39           | 29.9 ±4.1  |
| 20F04504            | 17.0 % | ✓ | 0.0400795       | 2.984992         | 0.0000000        | 207.1381        | 846.998         | 11.85 ±0.01      | 98.59          | 4.92           | 29.8 ±2.9  |
| 20F04506            | 17.0 % | ✓ | 0.0004636       | 1.671486         | 0.0000000        | 135.0810        | 552.115         | 11.85 ±0.01      | 99.96          | 3.21           | 34.8 ±6.1  |
| 20F04507            | 17.0 % | ✓ | 0.1103809       | 1.956345         | 0.0000000        | 137.7146        | 562.637         | 11.84 ±0.01      | 94.45          | 3.27           | 30.3 ±4.7  |
| 20F04509            | 17.0 % | ✓ | 0.0083699       | 2.961277         | 0.0000000        | 201.4901        | 823.038         | 11.84 ±0.01      | 99.68          | 4.79           | 29.3 ±3.0  |
| 20F04510            | 17.0 % | ✓ | 0.0045326       | 2.530886         | 0.0000000        | 157.8564        | 644.175         | 11.83 ±0.01      | 99.78          | 3.75           | 26.8 ±3.1  |
| 20F04512            | 17.0 % | ✓ | 0.0149566       | 1.255845         | 0.0000000        | 93.9724         | 383.954         | 11.84 ±0.01      | 98.84          | 2.23           | 32.2 ±8.0  |
| 20F04513            | 17.0 % |   | 0.0000440       | 0.303875         | 0.0000000        | 17.4444         | 71.895          | 11.95 ±0.04      | 100.00         | 0.41           | 24.7 ±23.2 |
| 20F04515            | 17.0 % | ✓ | 0.0040612       | 1.639066         | 0.0000000        | 115.5997        | 472.061         | 11.84 ±0.01      | 99.73          | 2.75           | 30.3 ±6.3  |
| 20F04516            | 17.0 % | ✓ | 0.0016515       | 1.172588         | 0.0000000        | 85.4011         | 349.398         | 11.86 ±0.01      | 99.84          | 2.03           | 31.3 ±8.4  |
| 20F04518            | 17.0 % | ✓ | 0.0098933       | 2.480259         | 0.0000000        | 193.1612        | 788.758         | 11.84 ±0.01      | 99.61          | 4.59           | 33.5 ±3.9  |
| 20F04519            | 17.0 % |   | 0.7472827       | 3.068628         | 0.0000000        | 228.8069        | 940.431         | 11.91 ±0.02      | 80.82          | 5.44           | 32.1 ±3.1  |
| 20F04521            | 17.0 % | ✓ | 0.0120738       | 1.880404         | 0.0000000        | 111.9721        | 456.969         | 11.83 ±0.01      | 99.20          | 2.66           | 25.6 ±3.8  |
| 20F04522            | 17.0 % | ✓ | 0.0014289       | 1.511791         | 0.0000000        | 102.6962        | 420.099         | 11.86 ±0.01      | 99.88          | 2.44           | 29.2 ±5.4  |
| 20F04524            | 17.0 % | ✓ | 0.0108607       | 1.918264         | 0.0081714        | 136.0839        | 555.547         | 11.83 ±0.01      | 99.41          | 3.24           | 30.5 ±4.9  |
| 20F04525            | 17.0 % | ✓ | 0.0008137       | 1.127067         | 0.0046692        | 66.9131         | 273.326         | 11.84 ±0.01      | 99.90          | 1.59           | 25.5 ±7.2  |
| Σ                   |        |   | 1.3336646       | 60.971353        | 0.0173438        | 4206.2635       | 17193.393       |                  |                |                |            |

| Information on Analysis                                                                                                                                                                                                                              | Results                   | 40(r)/39(k) ± 2σ          | Age ± 2σ<br>(Ma)                                                              | MSWD                         | 39Ar(k)<br>(%,n)                                          | K/Ca ± 2σ  |
|------------------------------------------------------------------------------------------------------------------------------------------------------------------------------------------------------------------------------------------------------|---------------------------|---------------------------|-------------------------------------------------------------------------------|------------------------------|-----------------------------------------------------------|------------|
| Project = SWENTON (18-58)<br>Sample = VS17-045<br>Material = Sanidine<br>Location = Iron Point<br>Region = Eastern Oregon<br>Analyst = Dan Miggins<br>Irradiation = 19-OSU-02 (2C36-19)<br>J = 0.00158855 ± 0.00000384<br>FCT-NM = 28.201 ± 0.023 Ma | Age Plateau<br>Error Mean | 4.08604 ± 0.00110 ± 0.03% | 11.84 ± 0.06 ± 0.48%<br>Full External Error ± 0.62<br>Analytical Error ± 0.00 | 2.19<br>0%<br>1.54<br>1.4802 | 94.15<br>28<br>2σ Confidence Limit<br>Error Magnification | 29.1 ± 0.9 |
|                                                                                                                                                                                                                                                      | Total Fusion Age          | 4.08757 ± 0.00080 ± 0.02% | 11.85 ± 0.06 ± 0.48%<br>Full External Error ± 0.62<br>Analytical Error ± 0.00 |                              | 30                                                        | 29.7 ± 0.8 |

| Normal Isochron |        |   | 39(k)/36(a) ± 2σ      | 40(a+r)/36(a) ± 2σ      | r.i.   |
|-----------------|--------|---|-----------------------|-------------------------|--------|
| 20F04482        | 17.0 % | ✓ | 1206.52 ±14.52        | 5229.00 ±62.77          | 0.9974 |
| 20F04483        | 17.0 % | ✓ | 49054.23 ±11550.67    | 200615.15 ±47238.03     | 1.0000 |
| 20F04485        | 17.0 % | ✓ | 20125.79 ±3074.23     | 82560.18 ±12610.94      | 1.0000 |
| 20F04486        | 17.0 % | ✓ | 90043.45 ±35445.26    | 368597.46 ±145096.65    | 1.0000 |
| 20F04488        | 17.0 % | ✓ | 2120.49 ±32.04        | 8964.18 ±135.25         | 0.9984 |
| 20F04489        | 17.0 % | ✓ | 77825.66 ±30347.21    | 318022.75 ±124008.98    | 1.0000 |
| 20F04491        | 17.0 % | ✓ | 38645.14 ±7010.16     | 158222.69 ±28700.99     | 1.0000 |
| 20F04492        | 17.0 % | ✓ | 30691.60 ±3126.92     | 125683.18 ±12804.43     | 1.0000 |
| 20F04494        | 17.0 % | ✓ | 8139.45 ±267.83       | 33564.95 ±1104.10       | 0.9997 |
| 20F04495        | 17.0 % | ✓ | 2630.59 ±28.49        | 11057.16 ±119.39        | 0.9971 |
| 20F04497        | 17.0 % | ✓ | 11400.82 ±1052.13     | 46914.66 ±4329.36       | 1.0000 |
| 20F04498        | 17.0 % | ✓ | 15617.54 ±1696.83     | 64100.78 ±6964.26       | 1.0000 |
| 20F04500        | 17.0 % | ✓ | 11315.21 ±1046.14     | 46585.39 ±4306.82       | 1.0000 |
| 20F04501        | 17.0 % | ✓ | 156132.05 ±97203.97   | 638022.65 ±397216.86    | 1.0000 |
| 20F04503        | 17.0 % | ✓ | 16078.89 ±1319.85     | 66007.96 ±5418.06       | 0.9999 |
| 20F04504        | 17.0 % | ✓ | 5168.18 ±115.37       | 21431.50 ±478.11        | 0.9993 |
| 20F04506        | 17.0 % | ✓ | 291394.84 ±408508.31  | 1191312.23 ±1670108.00  | 1.0000 |
| 20F04507        | 17.0 % | ✓ | 1247.63 ±12.59        | 5395.79 ±54.28          | 0.9964 |
| 20F04509        | 17.0 % | ✓ | 24073.30 ±2056.67     | 98632.16 ±8426.13       | 1.0000 |
| 20F04510        | 17.0 % | ✓ | 34826.70 ±5061.71     | 142418.15 ±20698.69     | 1.0000 |
| 20F04512        | 17.0 % | ✓ | 6282.99 ±309.82       | 25969.70 ±1280.41       | 0.9998 |
| 20F04513        | 17.0 % |   | 396177.00 ±5394994.70 | 1632485.53 ±22230595.60 | 1.0000 |
| 20F04515        | 17.0 % | ✓ | 28464.57 ±4394.75     | 116536.02 ±17992.16     | 1.0000 |
| 20F04516        | 17.0 % | ✓ | 51712.33 ±19737.27    | 211866.91 ±80863.95     | 1.0000 |
| 20F04518        | 17.0 % | ✓ | 19524.42 ±1427.74     | 80024.97 ±5851.53       | 0.9999 |
| 20F04519        | 17.0 % |   | 306.19 ±1.47          | 1557.03 ±7.34           | 0.9847 |
| 20F04521        | 17.0 % | ✓ | 9274.01 ±554.96       | 38146.64 ±2282.50       | 0.9999 |
| 20F04522        | 17.0 % | ✓ | 71869.71 ±34751.79    | 294295.58 ±142303.12    | 1.0000 |
| 20F04524        | 17.0 % | ✓ | 12529.97 ±878.64      | 51450.73 ±3607.63       | 0.9999 |
| 20F04525        | 17.0 % | ✓ | 82228.88 ±61098.07    | 336186.04 ±249794.29    | 1.0000 |

| Results         | 40(a)/36(a) ± 2σ      | 40(r)/39(k) ± 2σ | Age ± 2σ (Ma)             | MSWD            |
|-----------------|-----------------------|------------------|---------------------------|-----------------|
| Normal Isochron | 297.82 ±5.86          | 4.08687 ±0.00138 | 11.85 ±0.06               | 2.48            |
| Error Chron     | ±1.97%                | ±0.03%           | ±0.48%                    | 0%              |
|                 |                       |                  | Full External Error ±0.62 |                 |
|                 |                       |                  | Analytical Error ±0.00    |                 |
|                 |                       |                  |                           |                 |
| Statistics      | 2σ Confidence Limit   | 1.55             | Convergence               | 0.00000008387   |
|                 | Error Magnification   | 1.5737           | Number of Iterations      | 1               |
|                 | Number of Data Points | 28               | Calculated Line           | Weighted York-2 |

| Inverse Isochron |        |   | 39(k)/40(a+r) ± 2σ   | 36(a)/40(a+r) ± 2σ     | r.i.   |
|------------------|--------|---|----------------------|------------------------|--------|
| 20F04482         | 17.0 % | ✓ | 0.2307366 ±0.0001995 | 0.00019124 ±0.00000230 | 0.0025 |
| 20F04483         | 17.0 % | ✓ | 0.2445191 ±0.0002090 | 0.00000498 ±0.00000117 | 0.0001 |
| 20F04485         | 17.0 % | ✓ | 0.2437711 ±0.0002213 | 0.00001211 ±0.00000185 | 0.0003 |
| 20F04486         | 17.0 % | ✓ | 0.2442867 ±0.0002083 | 0.00000271 ±0.00000107 | 0.0001 |
| 20F04488         | 17.0 % | ✓ | 0.2365510 ±0.0002000 | 0.00011156 ±0.00000168 | 0.0010 |
| 20F04489         | 17.0 % | ✓ | 0.2447173 ±0.0002099 | 0.00000314 ±0.00000123 | 0.0001 |
| 20F04491         | 17.0 % | ✓ | 0.2442453 ±0.0002097 | 0.00000632 ±0.00000115 | 0.0001 |
| 20F04492         | 17.0 % | ✓ | 0.2441982 ±0.0002047 | 0.00000796 ±0.00000081 | 0.0001 |
| 20F04494         | 17.0 % | ✓ | 0.2424986 ±0.0002030 | 0.00002979 ±0.00000098 | 0.0004 |
| 20F04495         | 17.0 % | ✓ | 0.2379084 ±0.0001970 | 0.00009044 ±0.00000098 | 0.0009 |
| 20F04497         | 17.0 % | ✓ | 0.2430119 ±0.0002195 | 0.00002132 ±0.00000197 | 0.0004 |
| 20F04498         | 17.0 % | ✓ | 0.2436405 ±0.0002146 | 0.00001560 ±0.00000169 | 0.0003 |
| 20F04500         | 17.0 % | ✓ | 0.2428919 ±0.0002171 | 0.00002147 ±0.00000198 | 0.0005 |
| 20F04501         | 17.0 % | ✓ | 0.2447124 ±0.0002071 | 0.00000157 ±0.00000098 | 0.0000 |
| 20F04503         | 17.0 % | ✓ | 0.2435901 ±0.0002086 | 0.00001515 ±0.00000124 | 0.0003 |
| 20F04504         | 17.0 % | ✓ | 0.2411487 ±0.0002017 | 0.00004666 ±0.00000104 | 0.0006 |
| 20F04506         | 17.0 % | ✓ | 0.2445999 ±0.0002100 | 0.00000084 ±0.00000118 | 0.0000 |
| 20F04507         | 17.0 % | ✓ | 0.2312230 ±0.0001991 | 0.00018533 ±0.00000186 | 0.0018 |
| 20F04509         | 17.0 % | ✓ | 0.2440715 ±0.0002060 | 0.00001014 ±0.00000087 | 0.0002 |
| 20F04510         | 17.0 % | ✓ | 0.2445384 ±0.0002084 | 0.00000702 ±0.00000102 | 0.0001 |
| 20F04512         | 17.0 % | ✓ | 0.2419354 ±0.0002162 | 0.00003851 ±0.00000190 | 0.0007 |
| 20F04513         | 17.0 % |   | 0.2426833 ±0.0003810 | 0.00000061 ±0.00000834 | 0.0000 |
| 20F04515         | 17.0 % | ✓ | 0.2442556 ±0.0002134 | 0.00000858 ±0.00000132 | 0.0002 |
| 20F04516         | 17.0 % | ✓ | 0.2440793 ±0.0002171 | 0.00000472 ±0.00000180 | 0.0001 |
| 20F04518         | 17.0 % | ✓ | 0.2439791 ±0.0002057 | 0.00001250 ±0.00000091 | 0.0002 |
| 20F04519         | 17.0 % |   | 0.1966472 ±0.0001641 | 0.00064225 ±0.00000303 | 0.0022 |
| 20F04521         | 17.0 % | ✓ | 0.2431146 ±0.0002105 | 0.00002621 ±0.00000157 | 0.0004 |
| 20F04522         | 17.0 % | ✓ | 0.2442093 ±0.0002150 | 0.00000340 ±0.00000164 | 0.0001 |
| 20F04524         | 17.0 % | ✓ | 0.2435334 ±0.0002074 | 0.00001944 ±0.00000136 | 0.0003 |
| 20F04525         | 17.0 % | ✓ | 0.2445934 ±0.0002273 | 0.00000297 ±0.00000221 | 0.0001 |

| Results          | 40(a)/36(a) ± 2σ      | 40(r)/39(k) ± 2σ | Age ± 2σ (Ma)             | MSWD            |
|------------------|-----------------------|------------------|---------------------------|-----------------|
| Inverse Isochron | 300.48 ±5.57          | 4.08581 ±0.00131 | 11.84 ±0.06               | 2.24            |
| Error Chron      | ±1.85%                | ±0.03%           | ±0.48%                    | 0%              |
|                  |                       |                  | Full External Error ±0.62 |                 |
|                  |                       |                  | Analytical Error ±0.00    |                 |
|                  |                       |                  |                           |                 |
| Statistics       | 2σ Confidence Limit   | 1.55             | Convergence               | 0.0006992924    |
|                  | Error Magnification   | 1.4952           | Number of Iterations      | 2               |
|                  | Number of Data Points | 28               | Calculated Line           | Weighted York-2 |
|                  | Spreading Factor      | 5.7%             |                           |                 |

| Degassing Patterns |        |   | 36Ar(a)<br>[fA] | %1σ    | 36Ar(c)<br>[fA] | %1σ  | 36Ar(ca)<br>[fA] | %1σ       | 36Ar(cl)<br>[fA] | %1σ       | 37Ar(ca)<br>[fA] | %1σ   | 38Ar(a)<br>[fA] | %1σ    | 38Ar(c)<br>[fA] | %1σ  | 38Ar(k)<br>[fA] | %1σ       | 38Ar(ca)<br>[fA] | %1σ   | 38Ar(cl)<br>[fA] | %1σ    | 39Ar(k)<br>[fA] | %1σ       | 39Ar(ca)<br>[fA] | %1σ   |
|--------------------|--------|---|-----------------|--------|-----------------|------|------------------|-----------|------------------|-----------|------------------|-------|-----------------|--------|-----------------|------|-----------------|-----------|------------------|-------|------------------|--------|-----------------|-----------|------------------|-------|
| 20F04482           | 17.0 % | ✓ | 0.0952153       | 0.60   | 0.0000000       | 0.00 | 0.0004124        | 10.40     | 0.0000000        | 0.00      | 1.525865         | 10.40 | 0.0179481       | 0.62   | 0.0000000       | 0.00 | 1.387397        | 0.10      | 0.0002747        | 14.17 | 0.0000000        | 0.00   | 114.8793        | 0.04      | 0.0009804        | 10.44 |
| 20F04483           | 17.0 % | ✓ | 0.0027419       | 11.77  | 0.0000000       | 0.00 | 0.0005321        | 7.92      | 0.0000002        | #####     | 1.968544         | 7.92  | 0.0005168       | 11.77  | 0.0000000       | 0.00 | 1.624361        | 0.10      | 0.0003543        | 12.47 | 0.0008832        | #####  | 134.5004        | 0.04      | 0.0012648        | 7.97  |
| 20F04485           | 17.0 % | ✓ | 0.0038368       | 7.64   | 0.0000000       | 0.00 | 0.0002444        | 17.76     | 0.0000009        | 255.18    | 0.904327         | 17.76 | 0.0007232       | 7.64   | 0.0000000       | 0.00 | 0.932560        | 0.10      | 0.0001628        | 20.20 | 0.0036199        | 255.18 | 77.2179         | 0.04      | 0.0005810        | 17.79 |
| 20F04486           | 17.0 % | ✓ | 0.0015008       | 19.68  | 0.0000000       | 0.00 | 0.0005369        | 7.84      | 0.0000000        | 0.00      | 1.986377         | 7.83  | 0.0002829       | 19.68  | 0.0000000       | 0.00 | 1.632001        | 0.10      | 0.0003575        | 12.41 | 0.0000000        | 0.00   | 135.1330        | 0.04      | 0.0012762        | 7.89  |
| 20F04488           | 17.0 % | ✓ | 0.0752810       | 0.75   | 0.0000000       | 0.00 | 0.0006066        | 7.26      | 0.0000000        | 0.00      | 2.244290         | 7.25  | 0.0141905       | 0.77   | 0.0000000       | 0.00 | 1.927880        | 0.10      | 0.0004040        | 12.06 | 0.0000000        | 0.00   | 159.6324        | 0.04      | 0.0014420        | 7.31  |
| 20F04489           | 17.0 % | ✓ | 0.0016671       | 19.50  | 0.0000000       | 0.00 | 0.0005175        | 8.08      | 0.0000000        | 0.00      | 1.914488         | 8.08  | 0.0003143       | 19.50  | 0.0000000       | 0.00 | 1.566946        | 0.10      | 0.0003446        | 12.57 | 0.0000000        | 0.00   | 129.7463        | 0.04      | 0.0012301        | 8.13  |
| 20F04491           | 17.0 % | ✓ | 0.0037292       | 9.07   | 0.0000000       | 0.00 | 0.0006609        | 6.31      | 0.0000000        | 0.00      | 2.445187         | 6.31  | 0.0007030       | 9.07   | 0.0000000       | 0.00 | 1.740487        | 0.10      | 0.0004401        | 11.51 | 0.0000000        | 0.00   | 144.1158        | 0.04      | 0.0015710        | 6.38  |
| 20F04492           | 17.0 % | ✓ | 0.0073291       | 5.09   | 0.0000000       | 0.00 | 0.0009368        | 4.37      | 0.0000000        | 0.00      | 3.465628         | 4.37  | 0.0013815       | 5.10   | 0.0000000       | 0.00 | 2.716633        | 0.10      | 0.0006238        | 10.57 | 0.0000000        | 0.00   | 224.9427        | 0.04      | 0.0022267        | 4.46  |
| 20F04494           | 17.0 % | ✓ | 0.0266470       | 1.64   | 0.0000000       | 0.00 | 0.0009119        | 4.66      | 0.0000000        | 0.00      | 3.373769         | 4.66  | 0.0050230       | 1.65   | 0.0000000       | 0.00 | 2.619401        | 0.10      | 0.0006073        | 10.70 | 0.0000000        | 0.00   | 216.8917        | 0.04      | 0.0021676        | 4.75  |
| 20F04495           | 17.0 % | ✓ | 0.1185785       | 0.54   | 0.0000000       | 0.00 | 0.0011736        | 3.39      | 0.0000000        | 0.00      | 4.341814         | 3.39  | 0.0223520       | 0.56   | 0.0000000       | 0.00 | 3.767196        | 0.10      | 0.0007815        | 10.21 | 0.0000000        | 0.00   | 311.9314        | 0.04      | 0.0027896        | 3.51  |
| 20F04497           | 17.0 % | ✓ | 0.0069467       | 4.61   | 0.0000000       | 0.00 | 0.0003599        | 12.32     | 0.0000000        | 0.00      | 1.331611         | 12.32 | 0.0013094       | 4.62   | 0.0000000       | 0.00 | 0.956470        | 0.10      | 0.0002397        | 15.64 | 0.0000000        | 0.00   | 79.1976         | 0.04      | 0.0008556        | 12.36 |
| 20F04498           | 17.0 % | ✓ | 0.0062500       | 5.43   | 0.0000000       | 0.00 | 0.0004368        | 10.03     | 0.0000000        | 0.00      | 1.616149         | 10.03 | 0.0011781       | 5.43   | 0.0000000       | 0.00 | 1.178837        | 0.10      | 0.0002909        | 13.91 | 0.0000000        | 0.00   | 97.6100         | 0.04      | 0.0010384        | 10.08 |
| 20F04500           | 17.0 % | ✓ | 0.0072052       | 4.62   | 0.0000000       | 0.00 | 0.0002956        | 13.40     | 0.0000000        | 0.00      | 1.093585         | 13.40 | 0.0013582       | 4.63   | 0.0000000       | 0.00 | 0.984611        | 0.10      | 0.0001968        | 16.50 | 0.0000000        | 0.00   | 81.5278         | 0.04      | 0.0007026        | 13.43 |
| 20F04501           | 17.0 % | ✓ | 0.0010562       | 31.13  | 0.0000000       | 0.00 | 0.0006076        | 6.95      | 0.0000000        | 0.00      | 2.248050         | 6.94  | 0.0001991       | 31.13  | 0.0000000       | 0.00 | 1.991539        | 0.10      | 0.0004046        | 11.87 | 0.0000000        | 0.00   | 164.9034        | 0.04      | 0.0014444        | 7.00  |
| 20F04503           | 17.0 % | ✓ | 0.0088751       | 4.10   | 0.0000000       | 0.00 | 0.0005538        | 6.92      | 0.0000000        | 0.00      | 2.048896         | 6.92  | 0.0016730       | 4.11   | 0.0000000       | 0.00 | 1.723417        | 0.10      | 0.0003688        | 11.86 | 0.0000000        | 0.00   | 142.7024        | 0.04      | 0.0013164        | 6.98  |
| 20F04504           | 17.0 % | ✓ | 0.0400795       | 1.12   | 0.0000000       | 0.00 | 0.0008068        | 4.86      | 0.0000000        | 0.00      | 2.984992         | 4.86  | 0.0075550       | 1.13   | 0.0000000       | 0.00 | 2.501607        | 0.10      | 0.0005373        | 10.79 | 0.0000000        | 0.00   | 207.1381        | 0.04      | 0.0019179        | 4.94  |
| 20F04506           | 17.0 % | ✓ | 0.0004636       | 70.10  | 0.0000000       | 0.00 | 0.0004518        | 8.76      | 0.0000000        | 0.00      | 1.671486         | 8.76  | 0.0000874       | 70.10  | 0.0000000       | 0.00 | 1.631374        | 0.10      | 0.0003009        | 13.02 | 0.0000000        | 0.00   | 135.0810        | 0.04      | 0.0010739        | 8.81  |
| 20F04507           | 17.0 % | ✓ | 0.1103809       | 0.50   | 0.0000000       | 0.00 | 0.0005288        | 7.76      | 0.0000000        | 0.00      | 1.956345         | 7.75  | 0.0208068       | 0.53   | 0.0000000       | 0.00 | 1.663179        | 0.10      | 0.0003521        | 12.36 | 0.0000000        | 0.00   | 137.7146        | 0.04      | 0.0012570        | 7.81  |
| 20F04509           | 17.0 % | ✓ | 0.0083699       | 4.27   | 0.0000000       | 0.00 | 0.0008004        | 5.19      | 0.0000000        | 0.00      | 2.961277         | 5.18  | 0.0015777       | 4.27   | 0.0000000       | 0.00 | 2.433395        | 0.10      | 0.0005330        | 10.94 | 0.0000000        | 0.00   | 201.4901        | 0.04      | 0.0019026        | 5.26  |
| 20F04510           | 17.0 % | ✓ | 0.0045326       | 7.27   | 0.0000000       | 0.00 | 0.0006841        | 5.87      | 0.0000000        | 0.00      | 2.530886         | 5.87  | 0.0008544       | 7.27   | 0.0000000       | 0.00 | 1.906432        | 0.10      | 0.0004556        | 11.28 | 0.0000000        | 0.00   | 157.8564        | 0.04      | 0.0016261        | 5.94  |
| 20F04512           | 17.0 % | ✓ | 0.0149566       | 2.47   | 0.0000000       | 0.00 | 0.0003395        | 12.51     | 0.0000000        | 0.00      | 1.255845         | 12.51 | 0.0028193       | 2.47   | 0.0000000       | 0.00 | 1.134905        | 0.10      | 0.0002261        | 15.79 | 0.0000000        | 0.00   | 93.9724         | 0.04      | 0.0008069        | 12.54 |
| 20F04513           | 17.0 % |   | 0.0000440       | 680.88 | 0.0000000       | 0.00 | 0.0000821        | 47.02     | 0.0000000        | 0.00      | 0.303875         | 47.02 | 0.0000083       | 680.88 | 0.0000000       | 0.00 | 0.210676        | 0.11      | 0.0000547        | 47.99 | 0.0000000        | 0.00   | 17.4444         | 0.07      | 0.0001952        | 47.03 |
| 20F04515           | 17.0 % | ✓ | 0.0040612       | 7.72   | 0.0000000       | 0.00 | 0.0004430        | 10.31     | 0.0000000        | 0.00      | 1.639066         | 10.31 | 0.0007655       | 7.72   | 0.0000000       | 0.00 | 1.396097        | 0.10      | 0.0002950        | 14.11 | 0.0000000        | 0.00   | 115.5997        | 0.04      | 0.0010531        | 10.35 |
| 20F04516           | 17.0 % | ✓ | 0.0016515       | 19.08  | 0.0000000       | 0.00 | 0.0003170        | 13.40     | 0.0000000        | 0.00      | 1.172588         | 13.40 | 0.0003113       | 19.08  | 0.0000000       | 0.00 | 1.031389        | 0.10      | 0.0002111        | 16.50 | 0.0000000        | 0.00   | 85.4011         | 0.04      | 0.0007534        | 13.43 |
| 20F04518           | 17.0 % | ✓ | 0.0098933       | 3.66   | 0.0000000       | 0.00 | 0.0006704        | 5.83      | 0.0000000        | 0.00      | 2.480259         | 5.83  | 0.0018649       | 3.66   | 0.0000000       | 0.00 | 2.332808        | 0.10      | 0.0004464        | 11.26 | 0.0000000        | 0.00   | 193.1612        | 0.04      | 0.0015936        | 5.90  |
| 20F04519           | 17.0 % |   | 0.7472827       | 0.24   | 0.0000000       | 0.00 | 0.0008295        | 4.86      | 0.0000000        | 0.00      | 3.068628         | 4.86  | 0.1408628       | 0.28   | 0.0000000       | 0.00 | 2.763301        | 0.10      | 0.0005524        | 10.79 | 0.0000000        | 0.00   | 228.8069        | 0.04      | 0.0019716        | 4.94  |
| 20F04521           | 17.0 % | ✓ | 0.0120738       | 2.99   | 0.0000000       | 0.00 | 0.0005083        | 7.48      | 0.0000000        | 0.00      | 1.880404         | 7.48  | 0.0022759       | 3.00   | 0.0000000       | 0.00 | 1.352287        | 0.10      | 0.0003385        | 12.20 | 0.0000000        | 0.00   | 111.9721        | 0.04      | 0.0012082        | 7.54  |
| 20F04522           | 17.0 % | ✓ | 0.0014289       | 24.18  | 0.0000000       | 0.00 | 0.0004086        | 9.18      | 0.0000000        | 0.00      | 1.511791         | 9.18  | 0.0002694       | 24.18  | 0.0000000       | 0.00 | 1.240262        | 0.10      | 0.0002721        | 13.30 | 0.0000000        | 0.00   | 102.6962        | 0.04      | 0.0009713        | 9.23  |
| 20F04524           | 17.0 % | ✓ | 0.0108607       | 3.51   | 0.0000000       | 0.00 | 0.0005185        | 7.99      | 0.00000020       | 128.16    | 1.918264         | 7.99  | 0.0020472       | 3.51   | 0.0000000       | 0.00 | 1.643485        | 0.10      | 0.0003453        | 12.51 | 0.0081714        | 128.16 | 136.0839        | 0.04      | 0.0012325        | 8.04  |
| 20F04525           | 17.0 % | ✓ | 0.0008137       | 37.15  | 0.0000000       | 0.00 | 0.0003046        | 14.17     | 0.00000011       | 195.18    | 1.127067         | 14.16 | 0.0001534       | 37.15  | 0.0000000       | 0.00 | 0.808110        | 0.10      | 0.0002029        | 17.13 | 0.0046692        | 195.18 | 66.9131         | 0.05      | 0.0007241        | 14.19 |
| Σ                  |        |   | 1.3336646       | 0.20   | 0.0000000       | 0.00 | 0.0164806        | 1.38      | 0.00000042       | 111.19    | 60.971353        | 1.37  | 0.2513958       | 0.22   | 0.0000000       | 0.00 | 50.799045       | 0.02      | 0.0109748        | 2.35  | 0.0173438        | 111.24 | 4206.2635       | 0.01      | 0.0391741        | 1.39  |
| Σ                  |        |   |                 |        |                 |      |                  | 1.3501494 | 0.20             | 60.971353 | 1.37             |       |                 |        |                 |      |                 | 51.078759 | 0.04             |       |                  |        |                 | 4206.3027 | 0.01             |       |

| 40Ar(r)<br>[fA] | %1σ  | 40Ar(a)<br>[fA] | %1σ    | 40Ar(c)<br>[fA] | %1σ  | 40Ar(k)<br>[fA] | %1σ  |
|-----------------|------|-----------------|--------|-----------------|------|-----------------|------|
| 469.453         | 0.04 | 28.42748        | 0.61   | 0.0000000       | 0.00 | 0.0697317       | 9.65 |
| 549.242         | 0.02 | 0.81861         | 11.77  | 0.0000000       | 0.00 | 0.0816417       | 9.65 |
| 315.618         | 0.03 | 1.14550         | 7.64   | 0.0000000       | 0.00 | 0.0468713       | 9.65 |
| 552.726         | 0.02 | 0.44806         | 19.68  | 0.0000000       | 0.00 | 0.0820257       | 9.65 |
| 652.357         | 0.03 | 22.47590        | 0.76   | 0.0000000       | 0.00 | 0.0968969       | 9.65 |
| 529.691         | 0.02 | 0.49774         | 19.50  | 0.0000000       | 0.00 | 0.0787560       | 9.65 |
| 588.932         | 0.02 | 1.11339         | 9.07   | 0.0000000       | 0.00 | 0.0874783       | 9.65 |
| 918.960         | 0.01 | 2.18818         | 5.09   | 0.0000000       | 0.00 | 0.1365402       | 9.65 |
| 886.448         | 0.02 | 7.95572         | 1.65   | 0.0000000       | 0.00 | 0.1316533       | 9.65 |
| 1275.738        | 0.02 | 35.40279        | 0.55   | 0.0000000       | 0.00 | 0.1893424       | 9.65 |
| 323.826         | 0.03 | 2.07399         | 4.62   | 0.0000000       | 0.00 | 0.0480730       | 9.65 |
| 398.765         | 0.03 | 1.86601         | 5.43   | 0.0000000       | 0.00 | 0.0592493       | 9.65 |
| 333.504         | 0.03 | 2.15117         | 4.62   | 0.0000000       | 0.00 | 0.0494874       | 9.65 |
| 673.551         | 0.02 | 0.31533         | 31.13  | 0.0000000       | 0.00 | 0.1000964       | 9.65 |
| 583.180         | 0.02 | 2.64976         | 4.11   | 0.0000000       | 0.00 | 0.0866203       | 9.65 |
| 846.998         | 0.02 | 11.96614        | 1.12   | 0.0000000       | 0.00 | 0.1257328       | 9.65 |
| 552.115         | 0.02 | 0.13840         | 70.10  | 0.0000000       | 0.00 | 0.0819942       | 9.65 |
| 562.637         | 0.03 | 32.95533        | 0.51   | 0.0000000       | 0.00 | 0.0835928       | 9.65 |
| 823.038         | 0.01 | 2.49890         | 4.27   | 0.0000000       | 0.00 | 0.1223045       | 9.65 |
| 644.175         | 0.02 | 1.35326         | 7.27   | 0.0000000       | 0.00 | 0.0958188       | 9.65 |
| 383.954         | 0.03 | 4.46546         | 2.47   | 0.0000000       | 0.00 | 0.0570413       | 9.65 |
| 71.895          | 0.13 | 0.01315         | 680.88 | 0.0000000       | 0.00 | 0.0105888       | 9.65 |
| 472.061         | 0.02 | 1.21250         | 7.72   | 0.0000000       | 0.00 | 0.0701690       | 9.65 |
| 349.398         | 0.03 | 0.49306         | 19.08  | 0.0000000       | 0.00 | 0.0518385       | 9.65 |
| 788.758         | 0.01 | 2.95375         | 3.66   | 0.0000000       | 0.00 | 0.1172489       | 9.65 |
| 940.431         | 0.06 | 223.10872       | 0.26   | 0.0000000       | 0.00 | 0.1388858       | 9.65 |
| 456.969         | 0.02 | 3.60474         | 2.99   | 0.0000000       | 0.00 | 0.0679671       | 9.65 |
| 420.099         | 0.03 | 0.42662         | 24.18  | 0.0000000       | 0.00 | 0.0623366       | 9.65 |
| 555.547         | 0.02 | 3.24256         | 3.51   | 0.0000000       | 0.00 | 0.0826029       | 9.65 |
| 273.326         | 0.03 | 0.24295         | 37.15  | 0.0000000       | 0.00 | 0.0406163       | 9.65 |
| 17193.393       | 0.01 | 398.17892       | 0.21   | 0.0000000       | 0.00 | 2.5532020       | 1.91 |
|                 |      |                 |        |                 |      | 17594.125       | 0.01 |

| Additional<br>Parameters |        |   | 40Ar/39Ar | 1σ       | 37Ar/39Ar | 1σ       | 36Ar/39Ar | 1σ       | Time<br>(days) | 37Ar<br>(decay) | 39Ar<br>(decay) | 40Ar<br>(moles) |
|--------------------------|--------|---|-----------|----------|-----------|----------|-----------|----------|----------------|-----------------|-----------------|-----------------|
| 20F04482                 | 17.0 % | ✓ | 4.334517  | 0.001873 | 0.013282  | 0.001381 | 0.000832  | 0.000005 | 148.206        | 18.724594       | 1.00104717      | 1.763E-11       |
| 20F04483                 | 17.0 % | ✓ | 4.090229  | 0.001747 | 0.014636  | 0.001159 | 0.000024  | 0.000002 | 148.213        | 18.726905       | 1.00104722      | 1.948E-11       |
| 20F04485                 | 17.0 % | ✓ | 4.102785  | 0.001861 | 0.011711  | 0.002080 | 0.000053  | 0.000004 | 148.224        | 18.731273       | 1.00104730      | 1.122E-11       |
| 20F04486                 | 17.0 % | ✓ | 4.094119  | 0.001745 | 0.014699  | 0.001152 | 0.000015  | 0.000002 | 148.230        | 18.733328       | 1.00104734      | 1.959E-11       |
| 20F04488                 | 17.0 % | ✓ | 4.227987  | 0.001786 | 0.014059  | 0.001020 | 0.000475  | 0.000004 | 148.242        | 18.737954       | 1.00104743      | 2.389E-11       |
| 20F04489                 | 17.0 % | ✓ | 4.086916  | 0.001752 | 0.014755  | 0.001192 | 0.000017  | 0.000002 | 148.248        | 18.740010       | 1.00104747      | 1.877E-11       |
| 20F04491                 | 17.0 % | ✓ | 4.094808  | 0.001757 | 0.016967  | 0.001071 | 0.000030  | 0.000002 | 148.260        | 18.744381       | 1.00104755      | 2.089E-11       |
| 20F04492                 | 17.0 % | ✓ | 4.095601  | 0.001716 | 0.015407  | 0.000673 | 0.000037  | 0.000002 | 148.266        | 18.746695       | 1.00104760      | 3.261E-11       |
| 20F04494                 | 17.0 % | ✓ | 4.124301  | 0.001725 | 0.015555  | 0.000725 | 0.000127  | 0.000002 | 148.278        | 18.751067       | 1.00104768      | 3.167E-11       |
| 20F04495                 | 17.0 % | ✓ | 4.203868  | 0.001739 | 0.013919  | 0.000472 | 0.000384  | 0.000002 | 148.283        | 18.753125       | 1.00104772      | 4.642E-11       |
| 20F04497                 | 17.0 % | ✓ | 4.115588  | 0.001858 | 0.016814  | 0.002072 | 0.000092  | 0.000004 | 148.296        | 18.757755       | 1.00104781      | 1.154E-11       |
| 20F04498                 | 17.0 % | ✓ | 4.104972  | 0.001807 | 0.016557  | 0.001661 | 0.000069  | 0.000003 | 148.301        | 18.759814       | 1.00104785      | 1.418E-11       |
| 20F04500                 | 17.0 % | ✓ | 4.117630  | 0.001839 | 0.013414  | 0.001797 | 0.000092  | 0.000004 | 148.313        | 18.764189       | 1.00104793      | 1.188E-11       |
| 20F04501                 | 17.0 % | ✓ | 4.087001  | 0.001728 | 0.013632  | 0.000947 | 0.000010  | 0.000002 | 148.319        | 18.766505       | 1.00104797      | 2.386E-11       |
| 20F04503                 | 17.0 % | ✓ | 4.105826  | 0.001757 | 0.014358  | 0.000993 | 0.000066  | 0.000003 | 148.331        | 18.770882       | 1.00104806      | 2.074E-11       |
| 20F04504                 | 17.0 % | ✓ | 4.147388  | 0.001734 | 0.014411  | 0.000700 | 0.000197  | 0.000002 | 148.338        | 18.773199       | 1.00104810      | 3.041E-11       |
| 20F04506                 | 17.0 % | ✓ | 4.088884  | 0.001754 | 0.012374  | 0.001084 | 0.000007  | 0.000002 | 148.349        | 18.777577       | 1.00104818      | 1.955E-11       |
| 20F04507                 | 17.0 % | ✓ | 4.325396  | 0.001861 | 0.014206  | 0.001102 | 0.000805  | 0.000004 | 148.355        | 18.779638       | 1.00104822      | 2.109E-11       |
| 20F04509                 | 17.0 % | ✓ | 4.097728  | 0.001728 | 0.014697  | 0.000762 | 0.000046  | 0.000002 | 148.367        | 18.784018       | 1.00104831      | 2.923E-11       |
| 20F04510                 | 17.0 % | ✓ | 4.089902  | 0.001742 | 0.016033  | 0.000941 | 0.000033  | 0.000002 | 148.373        | 18.786337       | 1.00104835      | 2.286E-11       |
| 20F04512                 | 17.0 % | ✓ | 4.133907  | 0.001847 | 0.013364  | 0.001672 | 0.000163  | 0.000004 | 148.385        | 18.790718       | 1.00104843      | 1.375E-11       |
| 20F04513                 | 17.0 % |   | 4.121157  | 0.003234 | 0.017419  | 0.008190 | 0.000002  | 0.000017 | 148.391        | 18.793038       | 1.00104848      | 2.545E-12       |
| 20F04515                 | 17.0 % | ✓ | 4.094642  | 0.001788 | 0.014179  | 0.001462 | 0.000039  | 0.000003 | 148.403        | 18.797420       | 1.00104856      | 1.676E-11       |
| 20F04516                 | 17.0 % | ✓ | 4.097600  | 0.001822 | 0.013730  | 0.001839 | 0.000023  | 0.000004 | 148.408        | 18.799483       | 1.00104860      | 1.239E-11       |
| 20F04518                 | 17.0 % | ✓ | 4.099284  | 0.001727 | 0.012840  | 0.000748 | 0.000055  | 0.000002 | 148.420        | 18.803868       | 1.00104868      | 2.803E-11       |
| 20F04519                 | 17.0 % |   | 5.085813  | 0.002122 | 0.013411  | 0.000651 | 0.003270  | 0.000008 | 148.426        | 18.806189       | 1.00104873      | 4.119E-11       |
| 20F04521                 | 17.0 % | ✓ | 4.113849  | 0.001780 | 0.016793  | 0.001257 | 0.000112  | 0.000003 | 148.438        | 18.810575       | 1.00104881      | 1.631E-11       |
| 20F04522                 | 17.0 % | ✓ | 4.095417  | 0.001802 | 0.014721  | 0.001351 | 0.000018  | 0.000003 | 148.444        | 18.812897       | 1.00104886      | 1.489E-11       |
| 20F04524                 | 17.0 % | ✓ | 4.106783  | 0.001748 | 0.014096  | 0.001127 | 0.000084  | 0.000003 | 148.456        | 18.817284       | 1.00104894      | 1.978E-11       |
| 20F04525                 | 17.0 % | ✓ | 4.088981  | 0.001899 | 0.016844  | 0.002386 | 0.000017  | 0.000004 | 148.462        | 18.819349       | 1.00104898      | 9.686E-12       |

| Procedure<br>Blanks |        | 36Ar ± 1σ (SE)<br>[fA] | 37Ar ± 1σ (SE)<br>[fA] | 38Ar ± 1σ (SE)<br>[fA] | 39Ar ± 1σ (SE)<br>[fA] | 40Ar ± 1σ (SE)<br>[fA] |
|---------------------|--------|------------------------|------------------------|------------------------|------------------------|------------------------|
| 20F04482            | 17.0 % | 0.0085016 ± 0.0002023  | 0.0154307 ± 0.0056048  | 0.0403541 ± 0.0063134  | 0.0368303 ± 0.0064913  | 1.8828286 ± 0.0167112  |
| 20F04483            | 17.0 % | 0.0085016 ± 0.0002023  | 0.0154307 ± 0.0056048  | 0.0403541 ± 0.0063134  | 0.0368303 ± 0.0064913  | 1.8828286 ± 0.0167112  |
| 20F04485            | 17.0 % | 0.0083274 ± 0.0001881  | 0.0189372 ± 0.0058064  | 0.0229525 ± 0.0062710  | 0.0241591 ± 0.0062483  | 1.7029834 ± 0.0147727  |
| 20F04486            | 17.0 % | 0.0083274 ± 0.0001881  | 0.0189372 ± 0.0058064  | 0.0229525 ± 0.0062710  | 0.0241591 ± 0.0062483  | 1.7029834 ± 0.0147727  |
| 20F04488            | 17.0 % | 0.0077547 ± 0.0002030  | 0.0232046 ± 0.0059552  | 0.0268381 ± 0.0066595  | 0.0412310 ± 0.0066753  | 1.7142423 ± 0.0153272  |
| 20F04489            | 17.0 % | 0.0077547 ± 0.0002030  | 0.0232046 ± 0.0059552  | 0.0268381 ± 0.0066595  | 0.0412310 ± 0.0066753  | 1.7142423 ± 0.0153272  |
| 20F04491            | 17.0 % | 0.0078394 ± 0.0001982  | 0.0304056 ± 0.0054485  | 0.0213575 ± 0.0067757  | 0.0257111 ± 0.0069047  | 1.6905907 ± 0.0161828  |
| 20F04492            | 17.0 % | 0.0078394 ± 0.0001982  | 0.0304056 ± 0.0054485  | 0.0213575 ± 0.0067757  | 0.0257111 ± 0.0069047  | 1.6905907 ± 0.0161828  |
| 20F04494            | 17.0 % | 0.0080653 ± 0.0002074  | 0.0220934 ± 0.0054640  | 0.0235441 ± 0.0070310  | 0.0324036 ± 0.0061288  | 1.7203603 ± 0.0148430  |
| 20F04495            | 17.0 % | 0.0080653 ± 0.0002074  | 0.0220934 ± 0.0054640  | 0.0235441 ± 0.0070310  | 0.0324036 ± 0.0061288  | 1.7203603 ± 0.0148430  |
| 20F04497            | 17.0 % | 0.0079929 ± 0.0001956  | 0.0252054 ± 0.0065781  | 0.0268394 ± 0.0065046  | 0.0392143 ± 0.0068244  | 1.7193953 ± 0.0120479  |
| 20F04498            | 17.0 % | 0.0079929 ± 0.0001956  | 0.0252054 ± 0.0065781  | 0.0268394 ± 0.0065046  | 0.0392143 ± 0.0068244  | 1.7193953 ± 0.0120479  |
| 20F04500            | 17.0 % | 0.0079915 ± 0.0002156  | 0.0138073 ± 0.0053243  | 0.0258571 ± 0.0061989  | 0.0317705 ± 0.0054618  | 1.7205272 ± 0.0145351  |
| 20F04501            | 17.0 % | 0.0079915 ± 0.0002156  | 0.0138073 ± 0.0053243  | 0.0258571 ± 0.0061989  | 0.0317705 ± 0.0054618  | 1.7205272 ± 0.0145351  |
| 20F04503            | 17.0 % | 0.0092291 ± 0.0001958  | 0.0260762 ± 0.0049413  | 0.0310967 ± 0.0069209  | 0.0220995 ± 0.0063188  | 1.9636181 ± 0.0156632  |
| 20F04504            | 17.0 % | 0.0092291 ± 0.0001958  | 0.0260762 ± 0.0049413  | 0.0310967 ± 0.0069209  | 0.0220995 ± 0.0063188  | 1.9636181 ± 0.0156632  |
| 20F04506            | 17.0 % | 0.0085028 ± 0.0002117  | 0.0151678 ± 0.0055751  | 0.0346209 ± 0.0064369  | 0.0340894 ± 0.0060917  | 1.8393669 ± 0.0150068  |
| 20F04507            | 17.0 % | 0.0085028 ± 0.0002117  | 0.0151678 ± 0.0055751  | 0.0346209 ± 0.0064369  | 0.0340894 ± 0.0060917  | 1.8393669 ± 0.0150068  |
| 20F04509            | 17.0 % | 0.0078394 ± 0.0001982  | 0.0304056 ± 0.0054485  | 0.0213575 ± 0.0067757  | 0.0257111 ± 0.0069047  | 1.6905907 ± 0.0161828  |
| 20F04510            | 17.0 % | 0.0078394 ± 0.0001982  | 0.0304056 ± 0.0054485  | 0.0213575 ± 0.0067757  | 0.0257111 ± 0.0069047  | 1.6905907 ± 0.0161828  |
| 20F04512            | 17.0 % | 0.0080653 ± 0.0002074  | 0.0220934 ± 0.0054640  | 0.0235441 ± 0.0070310  | 0.0324036 ± 0.0061288  | 1.7203603 ± 0.0148430  |
| 20F04513            | 17.0 % | 0.0080653 ± 0.0002074  | 0.0220934 ± 0.0054640  | 0.0235441 ± 0.0070310  | 0.0324036 ± 0.0061288  | 1.7203603 ± 0.0148430  |
| 20F04515            | 17.0 % | 0.0079929 ± 0.0001956  | 0.0252054 ± 0.0065781  | 0.0268394 ± 0.0065046  | 0.0392143 ± 0.0068244  | 1.7193953 ± 0.0120479  |
| 20F04516            | 17.0 % | 0.0079929 ± 0.0001956  | 0.0252054 ± 0.0065781  | 0.0268394 ± 0.0065046  | 0.0392143 ± 0.0068244  | 1.7193953 ± 0.0120479  |
| 20F04518            | 17.0 % | 0.0079915 ± 0.0002156  | 0.0138073 ± 0.0053243  | 0.0258571 ± 0.0061989  | 0.0317705 ± 0.0054618  | 1.7205272 ± 0.0145351  |
| 20F04519            | 17.0 % | 0.0079915 ± 0.0002156  | 0.0138073 ± 0.0053243  | 0.0258571 ± 0.0061989  | 0.0317705 ± 0.0054618  | 1.7205272 ± 0.0145351  |
| 20F04521            | 17.0 % | 0.0092291 ± 0.0001958  | 0.0260762 ± 0.0049413  | 0.0310967 ± 0.0069209  | 0.0220995 ± 0.0063188  | 1.9636181 ± 0.0156632  |
| 20F04522            | 17.0 % | 0.0092291 ± 0.0001958  | 0.0260762 ± 0.0049413  | 0.0310967 ± 0.0069209  | 0.0220995 ± 0.0063188  | 1.9636181 ± 0.0156632  |
| 20F04524            | 17.0 % | 0.0085028 ± 0.0002117  | 0.0151678 ± 0.0055751  | 0.0346209 ± 0.0064369  | 0.0340894 ± 0.0060917  | 1.8393669 ± 0.0150068  |
| 20F04525            | 17.0 % | 0.0085028 ± 0.0002117  | 0.0151678 ± 0.0055751  | 0.0346209 ± 0.0064369  | 0.0340894 ± 0.0060917  | 1.8393669 ± 0.0150068  |

| Intercept Values |        | 36Ar ± 1σ (SE)<br>[fA] | r2     | Regression<br>(type,n) | 37Ar ± 1σ (SE)<br>[fA] | r2     | Regression<br>(type,n) | 38Ar ± 1σ (SE)<br>[fA] | r2     | Regression<br>(type,n) | 39Ar ± 1σ (SE)<br>[fA] | r2     | Regression<br>(type,n) | 40Ar ± 1σ (SE)<br>[fA] |
|------------------|--------|------------------------|--------|------------------------|------------------------|--------|------------------------|------------------------|--------|------------------------|------------------------|--------|------------------------|------------------------|
| 20F04482         | 17.0 % | 0.1032805 ±0.0005042   | 0.3097 | EXP 150 of 150         | 0.0659295 ±0.0063272   | 0.0268 | EXP 150 of 150         | 1.3598248 ±0.0063631   | 0.8292 | EXP 150 of 150         | 114.662425 ±0.012913   | 0.9999 | EXP 150 of 150         | 499.83337 ±0.03552     |
| 20F04483         | 17.0 % | 0.0117467 ±0.0002442   | 0.9729 | EXP 147 of 150         | 0.0895205 ±0.0061227   | 0.0621 | EXP 150 of 150         | 1.5840341 ±0.0060322   | 0.8812 | EXP 150 of 150         | 134.252879 ±0.014475   | 0.9999 | EXP 148 of 150         | 552.02540 ±0.03043     |
| 20F04485         | 17.0 % | 0.0123732 ±0.0002170   | 0.9658 | EXP 149 of 150         | 0.0292649 ±0.0062883   | 0.0039 | EXP 150 of 150         | 0.9131184 ±0.0063204   | 0.7241 | EXP 150 of 150         | 77.072624 ±0.011774    | 0.9998 | EXP 149 of 150         | 318.51380 ±0.03042     |
| 20F04486         | 17.0 % | 0.0103470 ±0.0002204   | 0.9808 | EXP 148 of 150         | 0.0869285 ±0.0059052   | 0.0443 | EXP 150 of 150         | 1.5876719 ±0.0067036   | 0.8499 | EXP 150 of 150         | 134.897132 ±0.014084   | 0.9999 | EXP 149 of 150         | 554.95876 ±0.03167     |
| 20F04488         | 17.0 % | 0.0829688 ±0.0005087   | 0.7801 | EXP 150 of 150         | 0.0963771 ±0.0062851   | 0.0162 | EXP 149 of 150         | 1.8790649 ±0.0064376   | 0.8957 | EXP 150 of 150         | 159.340997 ±0.015290   | 0.9999 | EXP 150 of 150         | 676.64402 ±0.03366     |
| 20F04489         | 17.0 % | 0.0099200 ±0.0002467   | 0.9743 | EXP 149 of 150         | 0.0787932 ±0.0056787   | 0.0277 | EXP 148 of 150         | 1.5183009 ±0.0070568   | 0.8325 | EXP 150 of 150         | 129.501842 ±0.014486   | 0.9999 | EXP 150 of 150         | 531.98167 ±0.03008     |
| 20F04491         | 17.0 % | 0.0121905 ±0.0002671   | 0.9709 | EXP 150 of 150         | 0.0998359 ±0.0061254   | 0.0353 | EXP 150 of 150         | 1.6868897 ±0.0068856   | 0.8587 | EXP 149 of 150         | 143.864524 ±0.016283   | 0.9999 | EXP 150 of 150         | 591.82355 ±0.03537     |
| 20F04492         | 17.0 % | 0.0160319 ±0.0003095   | 0.9779 | EXP 150 of 150         | 0.1541663 ±0.0058845   | 0.1186 | EXP 150 of 150         | 2.6561063 ±0.0064460   | 0.9474 | EXP 147 of 150         | 224.564664 ±0.019196   | 0.9999 | EXP 150 of 150         | 922.97536 ±0.04527     |
| 20F04494         | 17.0 % | 0.0353795 ±0.0003767   | 0.9529 | EXP 150 of 150         | 0.1575444 ±0.0062961   | 0.0784 | EXP 150 of 150         | 2.5647404 ±0.0071339   | 0.9290 | EXP 147 of 150         | 216.519598 ±0.018232   | 0.9999 | EXP 150 of 150         | 896.25611 ±0.04293     |
| 20F04495         | 17.0 % | 0.1267544 ±0.0005663   | 0.8708 | EXP 148 of 150         | 0.2090630 ±0.0055213   | 0.1503 | EXP 150 of 150         | 3.7440804 ±0.0066776   | 0.9706 | EXP 150 of 150         | 311.410106 ±0.020794   | 1.0000 | EXP 150 of 150         | 1313.05067 ±0.05257    |
| 20F04497         | 17.0 % | 0.0152346 ±0.0002461   | 0.9603 | EXP 146 of 150         | 0.0456715 ±0.0057361   | 0.0102 | EXP 150 of 150         | 0.9139582 ±0.0070458   | 0.6477 | EXP 149 of 150         | 79.034418 ±0.012093    | 0.9998 | EXP 149 of 150         | 327.66768 ±0.02739     |
| 20F04498         | 17.0 % | 0.0146204 ±0.0002701   | 0.9613 | EXP 150 of 150         | 0.0608070 ±0.0055731   | 0.0232 | EXP 150 of 150         | 1.1379967 ±0.0068187   | 0.7693 | EXP 150 of 150         | 97.417990 ±0.012898    | 0.9998 | EXP 150 of 150         | 402.41013 ±0.03058     |
| 20F04500         | 17.0 % | 0.0154257 ±0.0002466   | 0.9578 | EXP 149 of 150         | 0.0443804 ±0.0056873   | 0.0151 | EXP 149 of 150         | 0.9491179 ±0.0072594   | 0.6446 | EXP 150 of 150         | 81.368212 ±0.011727    | 0.9998 | EXP 147 of 150         | 337.42477 ±0.02967     |
| 20F04501         | 17.0 % | 0.0096406 ±0.0002408   | 0.9809 | EXP 149 of 150         | 0.1057926 ±0.0063520   | 0.0344 | EXP 150 of 150         | 1.9446302 ±0.0053621   | 0.9344 | EXP 145 of 150         | 164.613139 ±0.016045   | 0.9999 | EXP 148 of 150         | 675.68698 ±0.03806     |
| 20F04503         | 17.0 % | 0.0185743 ±0.0003005   | 0.9634 | EXP 150 of 150         | 0.0829029 ±0.0056718   | 0.0157 | EXP 150 of 150         | 1.6773046 ±0.0063893   | 0.8766 | EXP 149 of 150         | 142.456593 ±0.015597   | 0.9999 | EXP 150 of 150         | 587.88016 ±0.03629     |
| 20F04504         | 17.0 % | 0.0497525 ±0.0003900   | 0.9433 | EXP 150 of 150         | 0.1326736 ±0.0058780   | 0.0693 | EXP 149 of 150         | 2.4549117 ±0.0062644   | 0.9440 | EXP 148 of 150         | 206.791326 ±0.016637   | 0.9999 | EXP 150 of 150         | 861.05374 ±0.04283     |
| 20F04506         | 17.0 % | 0.0094100 ±0.0002395   | 0.9768 | EXP 149 of 150         | 0.0737055 ±0.0054213   | 0.0076 | EXP 150 of 150         | 1.5874931 ±0.0070510   | 0.8424 | EXP 150 of 150         | 134.835034 ±0.015674   | 0.9999 | EXP 150 of 150         | 554.17445 ±0.03110     |
| 20F04507         | 17.0 % | 0.1184280 ±0.0004736   | 0.3929 | EXP 150 of 150         | 0.0888402 ±0.0058107   | 0.0401 | EXP 150 of 150         | 1.6421923 ±0.0065827   | 0.8732 | EXP 150 of 150         | 137.464624 ±0.016817   | 0.9999 | EXP 150 of 150         | 597.51507 ±0.03309     |
| 20F04509         | 17.0 % | 0.0169283 ±0.0002905   | 0.9755 | EXP 147 of 150         | 0.1269922 ±0.0060338   | 0.0415 | EXP 150 of 150         | 2.3702157 ±0.0068089   | 0.9306 | EXP 150 of 150         | 201.148521 ±0.019533   | 0.9999 | EXP 150 of 150         | 827.34991 ±0.03961     |
| 20F04510         | 17.0 % | 0.0130098 ±0.0002562   | 0.9782 | EXP 150 of 150         | 0.1040995 ±0.0056816   | 0.0706 | EXP 150 of 150         | 1.8743523 ±0.0067680   | 0.8936 | EXP 150 of 150         | 157.583397 ±0.016815   | 0.9999 | EXP 150 of 150         | 647.31455 ±0.03449     |
| 20F04512         | 17.0 % | 0.0232256 ±0.0002969   | 0.9412 | EXP 150 of 150         | 0.0446335 ±0.0063023   | 0.0019 | EXP 150 of 150         | 1.1022103 ±0.0068020   | 0.7450 | EXP 150 of 150         | 93.792646 ±0.014141    | 0.9998 | EXP 150 of 150         | 390.19701 ±0.03138     |
| 20F04513         | 17.0 % | 0.0081030 ±0.0002093   | 0.9487 | EXP 149 of 150         | 0.0059496 ±0.0052684   | 0.0078 | EXP 149 of 150         | 0.1723333 ±0.0054578   | 0.1354 | EXP 144 of 150         | 17.384691 ±0.008149    | 0.9978 | EXP 149 of 150         | 73.61232 ±0.01845      |
| 20F04515         | 17.0 % | 0.0124571 ±0.0002370   | 0.9718 | EXP 148 of 150         | 0.0618521 ±0.0060951   | 0.0070 | EXP 150 of 150         | 1.3518365 ±0.0062285   | 0.8348 | EXP 144 of 150         | 115.379171 ±0.015005   | 0.9998 | EXP 150 of 150         | 475.06291 ±0.03353     |
| 20F04516         | 17.0 % | 0.0099438 ±0.0002398   | 0.9654 | EXP 148 of 150         | 0.0370687 ±0.0051224   | 0.0008 | EXP 150 of 150         | 0.9821506 ±0.0059785   | 0.7410 | EXP 148 of 150         | 85.227956 ±0.011966    | 0.9998 | EXP 150 of 150         | 351.66208 ±0.02657     |
| 20F04518         | 17.0 % | 0.0184615 ±0.0002833   | 0.9752 | EXP 149 of 150         | 0.1178843 ±0.0054962   | 0.0621 | EXP 150 of 150         | 2.2703494 ±0.0062687   | 0.9340 | EXP 150 of 150         | 192.826393 ±0.018363   | 0.9999 | EXP 150 of 150         | 793.54987 ±0.04123     |
| 20F04519         | 17.0 % | 0.7494632 ±0.0012435   | 0.9533 | EXP 150 of 150         | 0.1491042 ±0.0058106   | 0.0795 | EXP 150 of 150         | 2.8664878 ±0.0069926   | 0.9475 | EXP 150 of 150         | 228.416184 ±0.018858   | 0.9999 | EXP 149 of 150         | 1165.39951 ±0.05091    |
| 20F04521         | 17.0 % | 0.0216994 ±0.0002966   | 0.9513 | EXP 150 of 150         | 0.0737299 ±0.0055829   | 0.0277 | EXP 150 of 150         | 1.3194718 ±0.0068565   | 0.7847 | EXP 148 of 150         | 111.774611 ±0.013192   | 0.9999 | EXP 149 of 150         | 462.60501 ±0.03041     |
| 20F04522         | 17.0 % | 0.0110503 ±0.0002784   | 0.9615 | EXP 150 of 150         | 0.0541552 ±0.0054508   | 0.0190 | EXP 149 of 150         | 1.1862060 ±0.0061477   | 0.7714 | EXP 150 of 150         | 102.513039 ±0.014070   | 0.9998 | EXP 149 of 150         | 422.55124 ±0.02966     |
| 20F04524         | 17.0 % | 0.0197829 ±0.0003091   | 0.9559 | EXP 150 of 150         | 0.0866116 ±0.0059059   | 0.0432 | EXP 150 of 150         | 1.6176709 ±0.0070568   | 0.8523 | EXP 150 of 150         | 135.836344 ±0.013892   | 0.9999 | EXP 150 of 150         | 560.71145 ±0.03265     |
| 20F04525         | 17.0 % | 0.0096124 ±0.0002076   | 0.9706 | EXP 148 of 150         | 0.0446257 ±0.0063707   | 0.0287 | EXP 149 of 150         | 0.7776507 ±0.0060840   | 0.6452 | EXP 147 of 150         | 66.774212 ±0.011712    | 0.9997 | EXP 150 of 150         | 275.44887 ±0.02614     |



| r2     | Regression<br>(ttype,n) |            |
|--------|-------------------------|------------|
| 0.9999 | EXP                     | 147 of 150 |
| 1.0000 | EXP                     | 148 of 150 |
| 0.9999 | EXP                     | 150 of 150 |
| 1.0000 | EXP                     | 149 of 150 |
| 1.0000 | EXP                     | 149 of 150 |
| 1.0000 | EXP                     | 147 of 150 |
| 1.0000 | EXP                     | 150 of 150 |
| 1.0000 | EXP                     | 150 of 150 |
| 1.0000 | EXP                     | 150 of 150 |
| 1.0000 | EXP                     | 150 of 150 |
| 0.9999 | EXP                     | 150 of 150 |
| 0.9999 | EXP                     | 150 of 150 |
| 0.9999 | EXP                     | 150 of 150 |
| 1.0000 | EXP                     | 149 of 150 |
| 1.0000 | EXP                     | 150 of 150 |
| 1.0000 | EXP                     | 150 of 150 |
| 1.0000 | EXP                     | 149 of 150 |
| 1.0000 | EXP                     | 150 of 150 |
| 1.0000 | EXP                     | 150 of 150 |
| 1.0000 | EXP                     | 149 of 150 |
| 0.9999 | EXP                     | 150 of 150 |
| 0.9980 | EXP                     | 150 of 150 |
| 0.9999 | EXP                     | 148 of 150 |
| 0.9999 | EXP                     | 149 of 150 |
| 1.0000 | EXP                     | 148 of 150 |
| 1.0000 | EXP                     | 150 of 150 |
| 1.0000 | EXP                     | 148 of 150 |
| 0.9999 | EXP                     | 149 of 150 |
| 1.0000 | EXP                     | 150 of 150 |
| 0.9999 | EXP                     | 146 of 150 |

| Project Info |        | Analyst     | Irradiation | X-pos | Y-pos | Z/H-pos | Project                | Experiment | Nmb |
|--------------|--------|-------------|-------------|-------|-------|---------|------------------------|------------|-----|
| 20F04482     | 17.0 % | Dan Miggins | 19-OSU-02   | 0.00  | 0.00  | 44.79   | Oregon\Swenton (18-58) | 20F04478   | 01  |
| 20F04483     | 17.0 % | Dan Miggins | 19-OSU-02   | 0.00  | 0.00  | 44.79   | Oregon\Swenton (18-58) | 20F04478   | 01  |
| 20F04485     | 17.0 % | Dan Miggins | 19-OSU-02   | 0.00  | 0.00  | 44.79   | Oregon\Swenton (18-58) | 20F04478   | 01  |
| 20F04486     | 17.0 % | Dan Miggins | 19-OSU-02   | 0.00  | 0.00  | 44.79   | Oregon\Swenton (18-58) | 20F04478   | 01  |
| 20F04488     | 17.0 % | Dan Miggins | 19-OSU-02   | 0.00  | 0.00  | 44.79   | Oregon\Swenton (18-58) | 20F04478   | 01  |
| 20F04489     | 17.0 % | Dan Miggins | 19-OSU-02   | 0.00  | 0.00  | 44.79   | Oregon\Swenton (18-58) | 20F04478   | 01  |
| 20F04491     | 17.0 % | Dan Miggins | 19-OSU-02   | 0.00  | 0.00  | 44.79   | Oregon\Swenton (18-58) | 20F04478   | 01  |
| 20F04492     | 17.0 % | Dan Miggins | 19-OSU-02   | 0.00  | 0.00  | 44.79   | Oregon\Swenton (18-58) | 20F04478   | 01  |
| 20F04494     | 17.0 % | Dan Miggins | 19-OSU-02   | 0.00  | 0.00  | 44.79   | Oregon\Swenton (18-58) | 20F04478   | 01  |
| 20F04495     | 17.0 % | Dan Miggins | 19-OSU-02   | 0.00  | 0.00  | 44.79   | Oregon\Swenton (18-58) | 20F04478   | 01  |
| 20F04497     | 17.0 % | Dan Miggins | 19-OSU-02   | 0.00  | 0.00  | 44.79   | Oregon\Swenton (18-58) | 20F04478   | 01  |
| 20F04498     | 17.0 % | Dan Miggins | 19-OSU-02   | 0.00  | 0.00  | 44.79   | Oregon\Swenton (18-58) | 20F04478   | 01  |
| 20F04500     | 17.0 % | Dan Miggins | 19-OSU-02   | 0.00  | 0.00  | 44.79   | Oregon\Swenton (18-58) | 20F04478   | 01  |
| 20F04501     | 17.0 % | Dan Miggins | 19-OSU-02   | 0.00  | 0.00  | 44.79   | Oregon\Swenton (18-58) | 20F04478   | 01  |
| 20F04503     | 17.0 % | Dan Miggins | 19-OSU-02   | 0.00  | 0.00  | 44.79   | Oregon\Swenton (18-58) | 20F04478   | 01  |
| 20F04504     | 17.0 % | Dan Miggins | 19-OSU-02   | 0.00  | 0.00  | 44.79   | Oregon\Swenton (18-58) | 20F04478   | 01  |
| 20F04506     | 17.0 % | Dan Miggins | 19-OSU-02   | 0.00  | 0.00  | 44.79   | Oregon\Swenton (18-58) | 20F04478   | 01  |
| 20F04507     | 17.0 % | Dan Miggins | 19-OSU-02   | 0.00  | 0.00  | 44.79   | Oregon\Swenton (18-58) | 20F04478   | 01  |
| 20F04509     | 17.0 % | Dan Miggins | 19-OSU-02   | 0.00  | 0.00  | 44.79   | Oregon\Swenton (18-58) | 20F04478   | 01  |
| 20F04510     | 17.0 % | Dan Miggins | 19-OSU-02   | 0.00  | 0.00  | 44.79   | Oregon\Swenton (18-58) | 20F04478   | 01  |
| 20F04512     | 17.0 % | Dan Miggins | 19-OSU-02   | 0.00  | 0.00  | 44.79   | Oregon\Swenton (18-58) | 20F04478   | 01  |
| 20F04513     | 17.0 % | Dan Miggins | 19-OSU-02   | 0.00  | 0.00  | 44.79   | Oregon\Swenton (18-58) | 20F04478   | 01  |
| 20F04515     | 17.0 % | Dan Miggins | 19-OSU-02   | 0.00  | 0.00  | 44.79   | Oregon\Swenton (18-58) | 20F04478   | 01  |
| 20F04516     | 17.0 % | Dan Miggins | 19-OSU-02   | 0.00  | 0.00  | 44.79   | Oregon\Swenton (18-58) | 20F04478   | 01  |
| 20F04518     | 17.0 % | Dan Miggins | 19-OSU-02   | 0.00  | 0.00  | 44.79   | Oregon\Swenton (18-58) | 20F04478   | 01  |
| 20F04519     | 17.0 % | Dan Miggins | 19-OSU-02   | 0.00  | 0.00  | 44.79   | Oregon\Swenton (18-58) | 20F04478   | 01  |
| 20F04521     | 17.0 % | Dan Miggins | 19-OSU-02   | 0.00  | 0.00  | 44.79   | Oregon\Swenton (18-58) | 20F04478   | 01  |
| 20F04522     | 17.0 % | Dan Miggins | 19-OSU-02   | 0.00  | 0.00  | 44.79   | Oregon\Swenton (18-58) | 20F04478   | 01  |
| 20F04524     | 17.0 % | Dan Miggins | 19-OSU-02   | 0.00  | 0.00  | 44.79   | Oregon\Swenton (18-58) | 20F04478   | 01  |
| 20F04525     | 17.0 % | Dan Miggins | 19-OSU-02   | 0.00  | 0.00  | 44.79   | Oregon\Swenton (18-58) | 20F04478   | 01  |

| OSU Argon Geochronology Lab<br>CEOAS Oregon State University, Corvallis, USA |        |          |          |            |                  |                  |       |                     |                    |       |            |       |               |       |           |       |              |                        |     |       |      |      |     |        |
|------------------------------------------------------------------------------|--------|----------|----------|------------|------------------|------------------|-------|---------------------|--------------------|-------|------------|-------|---------------|-------|-----------|-------|--------------|------------------------|-----|-------|------|------|-----|--------|
| Sample Parameters                                                            |        | Sample   | Material | Location   | Standard Name    | Standard (in Ma) | %1σ   | Standard Reference  | Standard 40Ar/39Ar | %1σ   | J          | %1σ   | Air 40Ar/36Ar | %1σ   | MDF (lin) | %1σ   | Volume Ratio | Sensitivity (mol/volt) | Day | Month | Year | Hour | Min | Resist |
| 20F04482                                                                     | 17.0 % | VS17-045 | Sanidine | Iron Point | FCT-NM (2C36-19) | 28.201           | 0.082 | Kuiper et al (2008) | 9.77337            | 0.242 | 0.00158855 | 0.242 | 299.195       | 0.125 | 0.9994687 | 0.041 | 1            | 3.54E-14               | 31  | MAR   | 2020 | 20   | 19  | 1      |
| 20F04483                                                                     | 17.0 % | VS17-045 | Sanidine | Iron Point | FCT-NM (2C36-19) | 28.201           | 0.082 | Kuiper et al (2008) | 9.77337            | 0.242 | 0.00158855 | 0.242 | 299.195       | 0.125 | 0.9994687 | 0.041 | 1            | 3.54E-14               | 31  | MAR   | 2020 | 20   | 28  | 1      |
| 20F04485                                                                     | 17.0 % | VS17-045 | Sanidine | Iron Point | FCT-NM (2C36-19) | 28.201           | 0.082 | Kuiper et al (2008) | 9.77337            | 0.242 | 0.00158855 | 0.242 | 299.195       | 0.125 | 0.9994687 | 0.041 | 1            | 3.54E-14               | 31  | MAR   | 2020 | 20   | 45  | 1      |
| 20F04486                                                                     | 17.0 % | VS17-045 | Sanidine | Iron Point | FCT-NM (2C36-19) | 28.201           | 0.082 | Kuiper et al (2008) | 9.77337            | 0.242 | 0.00158855 | 0.242 | 299.195       | 0.125 | 0.9994687 | 0.041 | 1            | 3.54E-14               | 31  | MAR   | 2020 | 20   | 53  | 1      |
| 20F04488                                                                     | 17.0 % | VS17-045 | Sanidine | Iron Point | FCT-NM (2C36-19) | 28.201           | 0.082 | Kuiper et al (2008) | 9.77337            | 0.242 | 0.00158855 | 0.242 | 299.195       | 0.125 | 0.9994687 | 0.041 | 1            | 3.54E-14               | 31  | MAR   | 2020 | 21   | 11  | 1      |
| 20F04489                                                                     | 17.0 % | VS17-045 | Sanidine | Iron Point | FCT-NM (2C36-19) | 28.201           | 0.082 | Kuiper et al (2008) | 9.77337            | 0.242 | 0.00158855 | 0.242 | 299.195       | 0.125 | 0.9994687 | 0.041 | 1            | 3.54E-14               | 31  | MAR   | 2020 | 21   | 19  | 1      |
| 20F04491                                                                     | 17.0 % | VS17-045 | Sanidine | Iron Point | FCT-NM (2C36-19) | 28.201           | 0.082 | Kuiper et al (2008) | 9.77337            | 0.242 | 0.00158855 | 0.242 | 299.195       | 0.125 | 0.9994687 | 0.041 | 1            | 3.54E-14               | 31  | MAR   | 2020 | 21   | 36  | 1      |
| 20F04492                                                                     | 17.0 % | VS17-045 | Sanidine | Iron Point | FCT-NM (2C36-19) | 28.201           | 0.082 | Kuiper et al (2008) | 9.77337            | 0.242 | 0.00158855 | 0.242 | 299.195       | 0.125 | 0.9994687 | 0.041 | 1            | 3.54E-14               | 31  | MAR   | 2020 | 21   | 45  | 1      |
| 20F04494                                                                     | 17.0 % | VS17-045 | Sanidine | Iron Point | FCT-NM (2C36-19) | 28.201           | 0.082 | Kuiper et al (2008) | 9.77337            | 0.242 | 0.00158855 | 0.242 | 299.195       | 0.125 | 0.9994687 | 0.041 | 1            | 3.54E-14               | 31  | MAR   | 2020 | 22   | 2   | 1      |
| 20F04495                                                                     | 17.0 % | VS17-045 | Sanidine | Iron Point | FCT-NM (2C36-19) | 28.201           | 0.082 | Kuiper et al (2008) | 9.77337            | 0.242 | 0.00158855 | 0.242 | 299.195       | 0.125 | 0.9994687 | 0.041 | 1            | 3.54E-14               | 31  | MAR   | 2020 | 22   | 10  | 1      |
| 20F04497                                                                     | 17.0 % | VS17-045 | Sanidine | Iron Point | FCT-NM (2C36-19) | 28.201           | 0.082 | Kuiper et al (2008) | 9.77337            | 0.242 | 0.00158855 | 0.242 | 299.195       | 0.125 | 0.9994687 | 0.041 | 1            | 3.54E-14               | 31  | MAR   | 2020 | 22   | 28  | 1      |
| 20F04498                                                                     | 17.0 % | VS17-045 | Sanidine | Iron Point | FCT-NM (2C36-19) | 28.201           | 0.082 | Kuiper et al (2008) | 9.77337            | 0.242 | 0.00158855 | 0.242 | 299.195       | 0.125 | 0.9994687 | 0.041 | 1            | 3.54E-14               | 31  | MAR   | 2020 | 22   | 36  | 1      |
| 20F04500                                                                     | 17.0 % | VS17-045 | Sanidine | Iron Point | FCT-NM (2C36-19) | 28.201           | 0.082 | Kuiper et al (2008) | 9.77337            | 0.242 | 0.00158855 | 0.242 | 299.195       | 0.125 | 0.9994687 | 0.041 | 1            | 3.54E-14               | 31  | MAR   | 2020 | 22   | 53  | 1      |
| 20F04501                                                                     | 17.0 % | VS17-045 | Sanidine | Iron Point | FCT-NM (2C36-19) | 28.201           | 0.082 | Kuiper et al (2008) | 9.77337            | 0.242 | 0.00158855 | 0.242 | 299.195       | 0.125 | 0.9994687 | 0.041 | 1            | 3.54E-14               | 31  | MAR   | 2020 | 23   | 2   | 1      |
| 20F04503                                                                     | 17.0 % | VS17-045 | Sanidine | Iron Point | FCT-NM (2C36-19) | 28.201           | 0.082 | Kuiper et al (2008) | 9.77337            | 0.242 | 0.00158855 | 0.242 | 299.195       | 0.125 | 0.9994687 | 0.041 | 1            | 3.54E-14               | 31  | MAR   | 2020 | 23   | 19  | 1      |
| 20F04504                                                                     | 17.0 % | VS17-045 | Sanidine | Iron Point | FCT-NM (2C36-19) | 28.201           | 0.082 | Kuiper et al (2008) | 9.77337            | 0.242 | 0.00158855 | 0.242 | 299.195       | 0.125 | 0.9994687 | 0.041 | 1            | 3.54E-14               | 31  | MAR   | 2020 | 23   | 28  | 1      |
| 20F04506                                                                     | 17.0 % | VS17-045 | Sanidine | Iron Point | FCT-NM (2C36-19) | 28.201           | 0.082 | Kuiper et al (2008) | 9.77337            | 0.242 | 0.00158855 | 0.242 | 299.195       | 0.125 | 0.9994687 | 0.041 | 1            | 3.54E-14               | 31  | MAR   | 2020 | 23   | 45  | 1      |
| 20F04507                                                                     | 17.0 % | VS17-045 | Sanidine | Iron Point | FCT-NM (2C36-19) | 28.201           | 0.082 | Kuiper et al (2008) | 9.77337            | 0.242 | 0.00158855 | 0.242 | 299.195       | 0.125 | 0.9994687 | 0.041 | 1            | 3.54E-14               | 31  | MAR   | 2020 | 23   | 53  | 1      |
| 20F04509                                                                     | 17.0 % | VS17-045 | Sanidine | Iron Point | FCT-NM (2C36-19) | 28.201           | 0.082 | Kuiper et al (2008) | 9.77337            | 0.242 | 0.00158855 | 0.242 | 299.195       | 0.125 | 0.9994687 | 0.041 | 1            | 3.54E-14               | 1   | APR   | 2020 | 0    | 10  | 1      |
| 20F04510                                                                     | 17.0 % | VS17-045 | Sanidine | Iron Point | FCT-NM (2C36-19) | 28.201           | 0.082 | Kuiper et al (2008) | 9.77337            | 0.242 | 0.00158855 | 0.242 | 299.195       | 0.125 | 0.9994687 | 0.041 | 1            | 3.54E-14               | 1   | APR   | 2020 | 0    | 19  | 1      |
| 20F04512                                                                     | 17.0 % | VS17-045 | Sanidine | Iron Point | FCT-NM (2C36-19) | 28.201           | 0.082 | Kuiper et al (2008) | 9.77337            | 0.242 | 0.00158855 | 0.242 | 299.195       | 0.125 | 0.9994687 | 0.041 | 1            | 3.54E-14               | 1   | APR   | 2020 | 0    | 36  | 1      |
| 20F04513                                                                     | 17.0 % | VS17-045 | Sanidine | Iron Point | FCT-NM (2C36-19) | 28.201           | 0.082 | Kuiper et al (2008) | 9.77337            | 0.242 | 0.00158855 | 0.242 | 299.195       | 0.125 | 0.9994687 | 0.041 | 1            | 3.54E-14               | 1   | APR   | 2020 | 0    | 45  | 1      |
| 20F04515                                                                     | 17.0 % | VS17-045 | Sanidine | Iron Point | FCT-NM (2C36-19) | 28.201           | 0.082 | Kuiper et al (2008) | 9.77337            | 0.242 | 0.00158855 | 0.242 | 299.195       | 0.125 | 0.9994687 | 0.041 | 1            | 3.54E-14               | 1   | APR   | 2020 | 1    | 2   | 1      |
| 20F04516                                                                     | 17.0 % | VS17-045 | Sanidine | Iron Point | FCT-NM (2C36-19) | 28.201           | 0.082 | Kuiper et al (2008) | 9.77337            | 0.242 | 0.00158855 | 0.242 | 299.195       | 0.125 | 0.9994687 | 0.041 | 1            | 3.54E-14               | 1   | APR   | 2020 | 1    | 10  | 1      |
| 20F04518                                                                     | 17.0 % | VS17-045 | Sanidine | Iron Point | FCT-NM (2C36-19) | 28.201           | 0.082 | Kuiper et al (2008) | 9.77337            | 0.242 | 0.00158855 | 0.242 | 299.195       | 0.125 | 0.9994687 | 0.041 | 1            | 3.54E-14               | 1   | APR   | 2020 | 1    | 27  | 1      |
| 20F04519                                                                     | 17.0 % | VS17-045 | Sanidine | Iron Point | FCT-NM (2C36-19) | 28.201           | 0.082 | Kuiper et al (2008) | 9.77337            | 0.242 | 0.00158855 | 0.242 | 299.195       | 0.125 | 0.9994687 | 0.041 | 1            | 3.54E-14               | 1   | APR   | 2020 | 1    | 36  | 1      |
| 20F04521                                                                     | 17.0 % | VS17-045 | Sanidine | Iron Point | FCT-NM (2C36-19) | 28.201           | 0.082 | Kuiper et al (2008) | 9.77337            | 0.242 | 0.00158855 | 0.242 | 299.195       | 0.125 | 0.9994687 | 0.041 | 1            | 3.54E-14               | 1   | APR   | 2020 | 1    | 53  | 1      |
| 20F04522                                                                     | 17.0 % | VS17-045 | Sanidine | Iron Point | FCT-NM (2C36-19) | 28.201           | 0.082 | Kuiper et al (2008) | 9.77337            | 0.242 | 0.00158855 | 0.242 | 299.195       | 0.125 | 0.9994687 | 0.041 | 1            | 3.54E-14               | 1   | APR   | 2020 | 2    | 2   | 1      |
| 20F04524                                                                     | 17.0 % | VS17-045 | Sanidine | Iron Point | FCT-NM (2C36-19) | 28.201           | 0.082 | Kuiper et al (2008) | 9.77337            | 0.242 | 0.00158855 | 0.242 | 299.195       | 0.125 | 0.9994687 | 0.041 | 1            | 3.54E-14               | 1   | APR   | 2020 | 2    | 19  | 1      |
| 20F04525                                                                     | 17.0 % | VS17-045 | Sanidine | Iron Point | FCT-NM (2C36-19) | 28.201           | 0.082 | Kuiper et al (2008) | 9.77337            | 0.242 | 0.00158855 | 0.242 | 299.195       | 0.125 | 0.9994687 | 0.041 | 1            | 3.54E-14               | 1   | APR   | 2020 | 2    | 27  | 1      |



20F04478.AGE >>> VS17-045 >>> OREGON | SWENTON (18-58) PROJECT

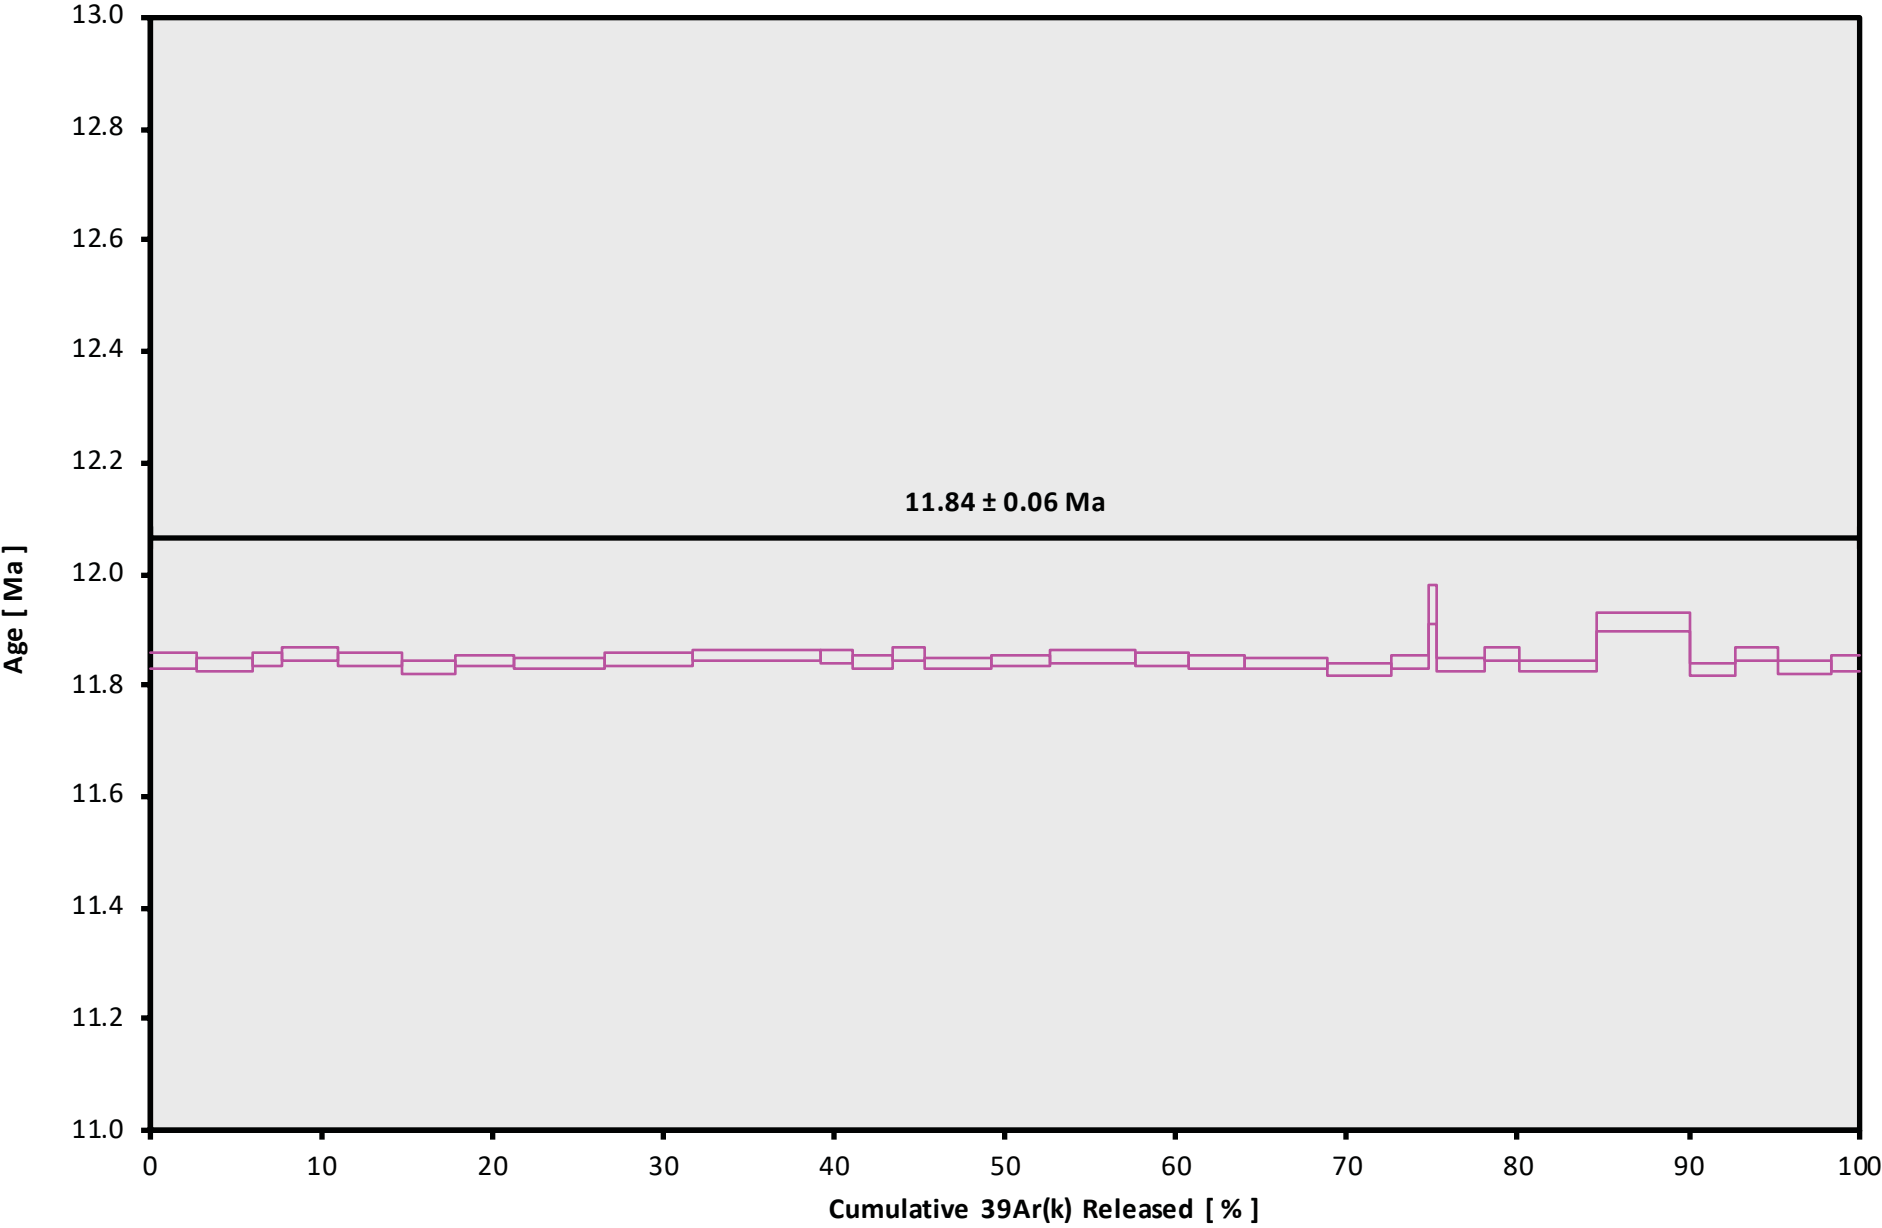

Ar-Ages in Ma

WEIGHTED PLATEAU

$11.84 \pm 0.06$

TOTAL FUSION

$11.85 \pm 0.06$

NORMAL ISOCHRON

$11.85 \pm 0.06$

INVERSE ISOCHRON

$11.84 \pm 0.06$

MSWD (PROBABILITY)

2.19 (0%)

Sample Info

Sanidine

Iron Point

Dan Miggins

IRR = 19-OSU-02 (2C36-

20F04478.AGE >>> VS17-045 >>> OREGON | SWENTON (18-58) PROJECT

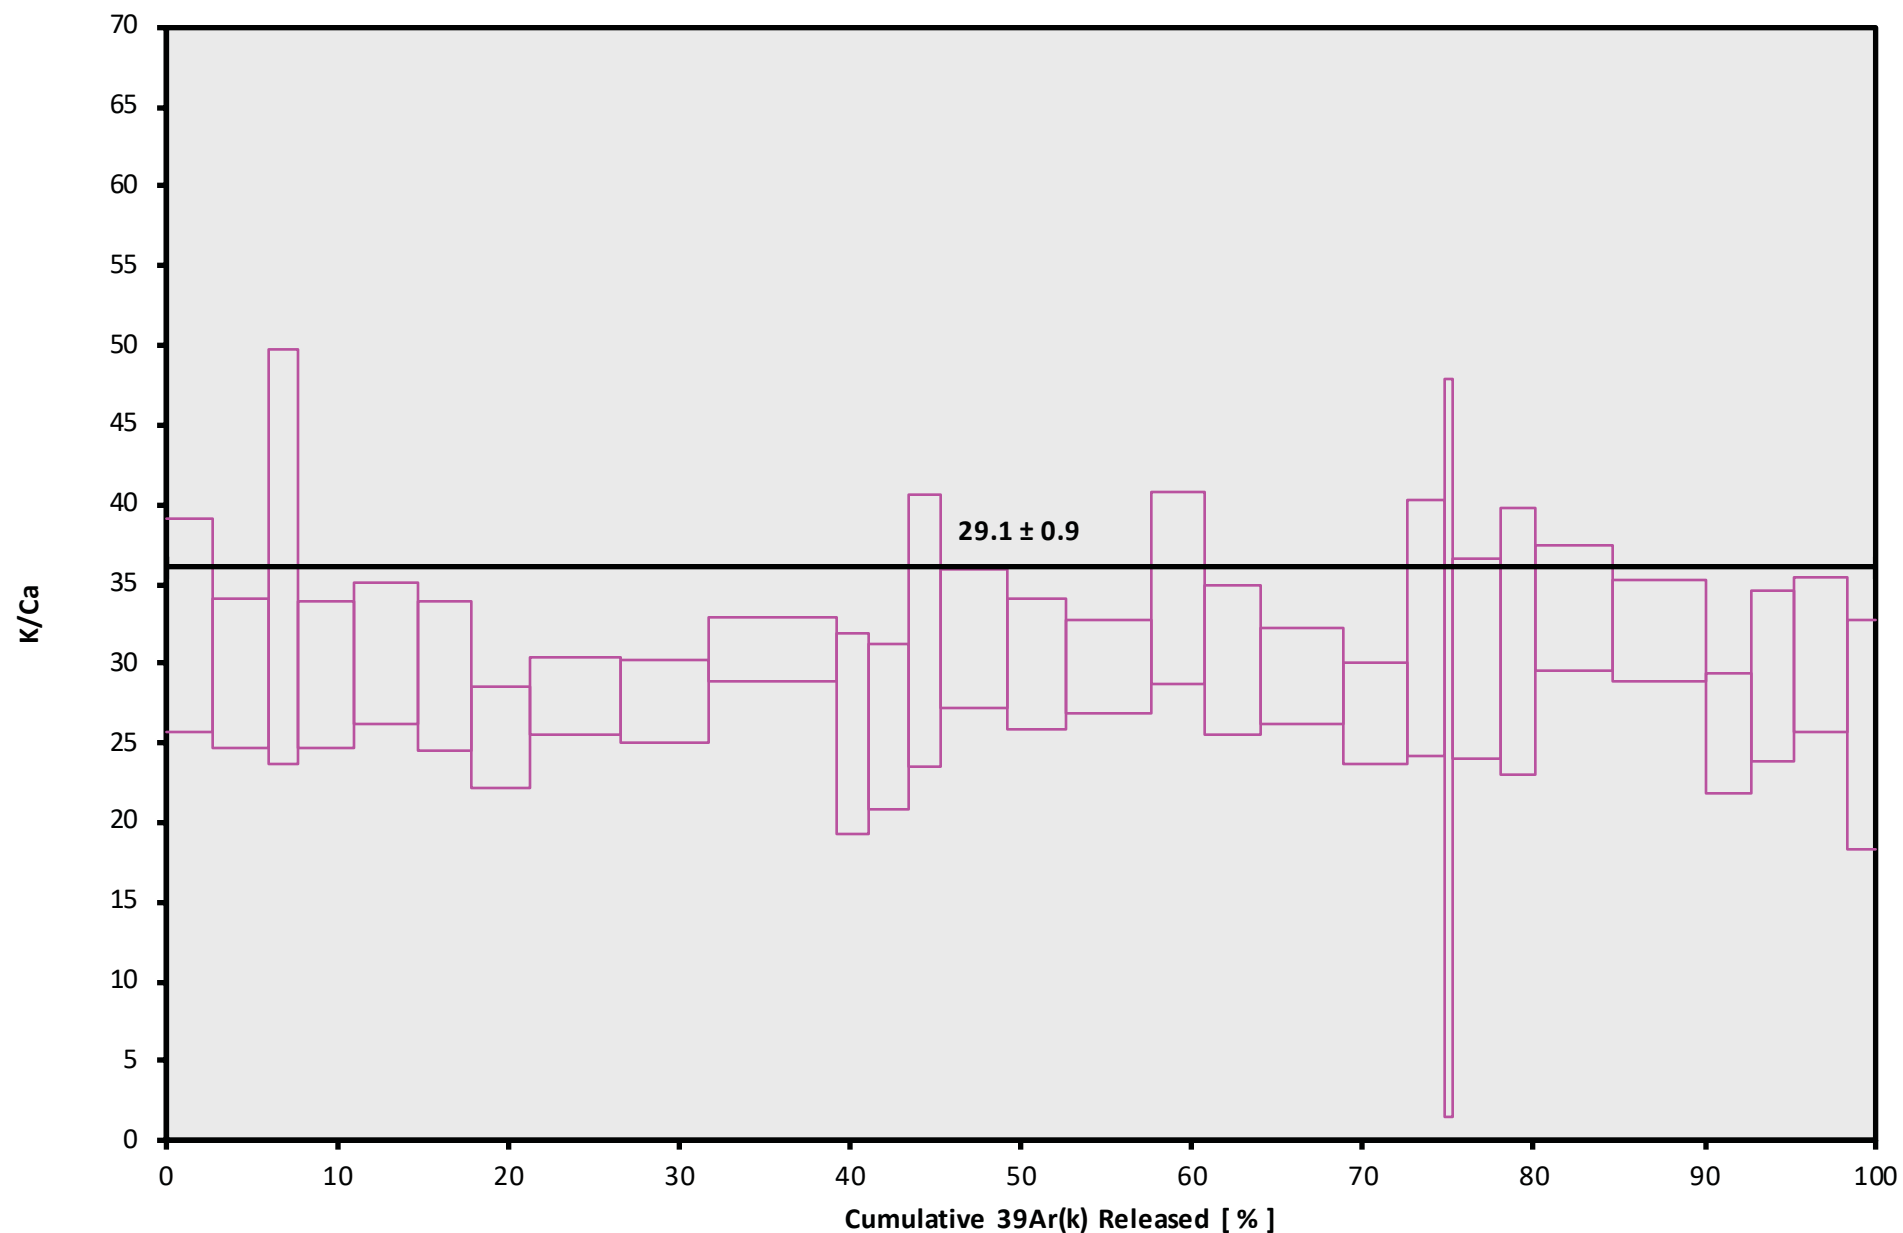

Ar-Ages in Ma

WEIGHTED PLATEAU

$11.84 \pm 0.06$

TOTAL FUSION

$11.85 \pm 0.06$

NORMAL ISOCHRON

$11.85 \pm 0.06$

INVERSE ISOCHRON

$11.84 \pm 0.06$

Sample Info

Sanidine

Iron Point

Dan Miggins

IRR = 19-OSU-02 (2C36-

20F04478.AGE >>> VS17-045 >>> OREGON | SWENTON (18-58) PROJECT

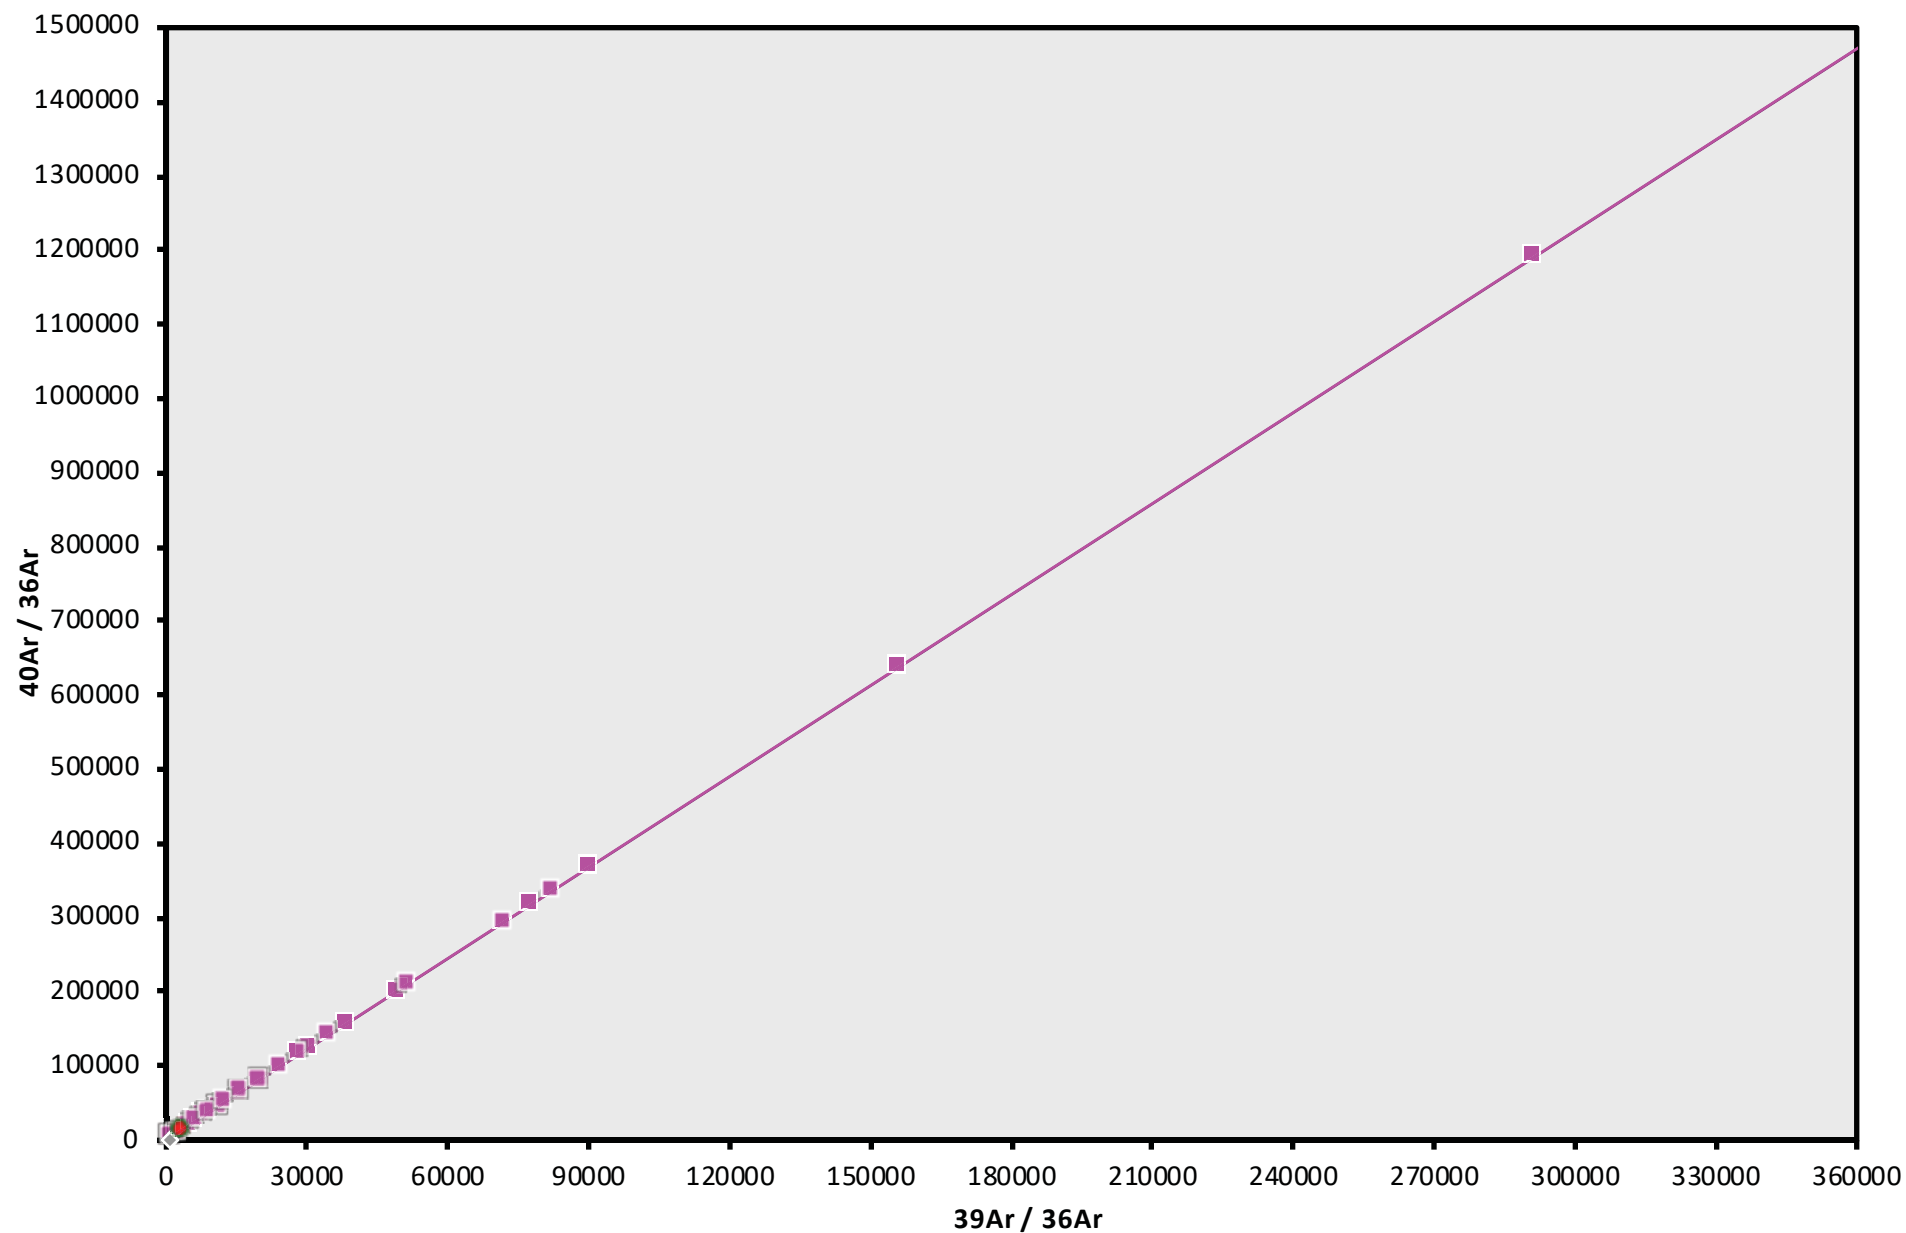

Ar-Ages in Ma

WEIGHTED PLATEAU

11.84 ± 0.06

TOTAL FUSION

11.85 ± 0.06

NORMAL ISOCHRON

11.85 ± 0.06

INVERSE ISOCHRON

11.84 ± 0.06

MSWD (PROBABILITY)

2.48 (0%)

40AR/36AR INTERCEPT

Sample Info

Sanidine

Iron Point

Dan Miggins

IRR = 19-OSU-02 (2C36-

20F04478.AGE >>> VS17-045 >>> OREGON | SWENTON (18-58) PROJECT

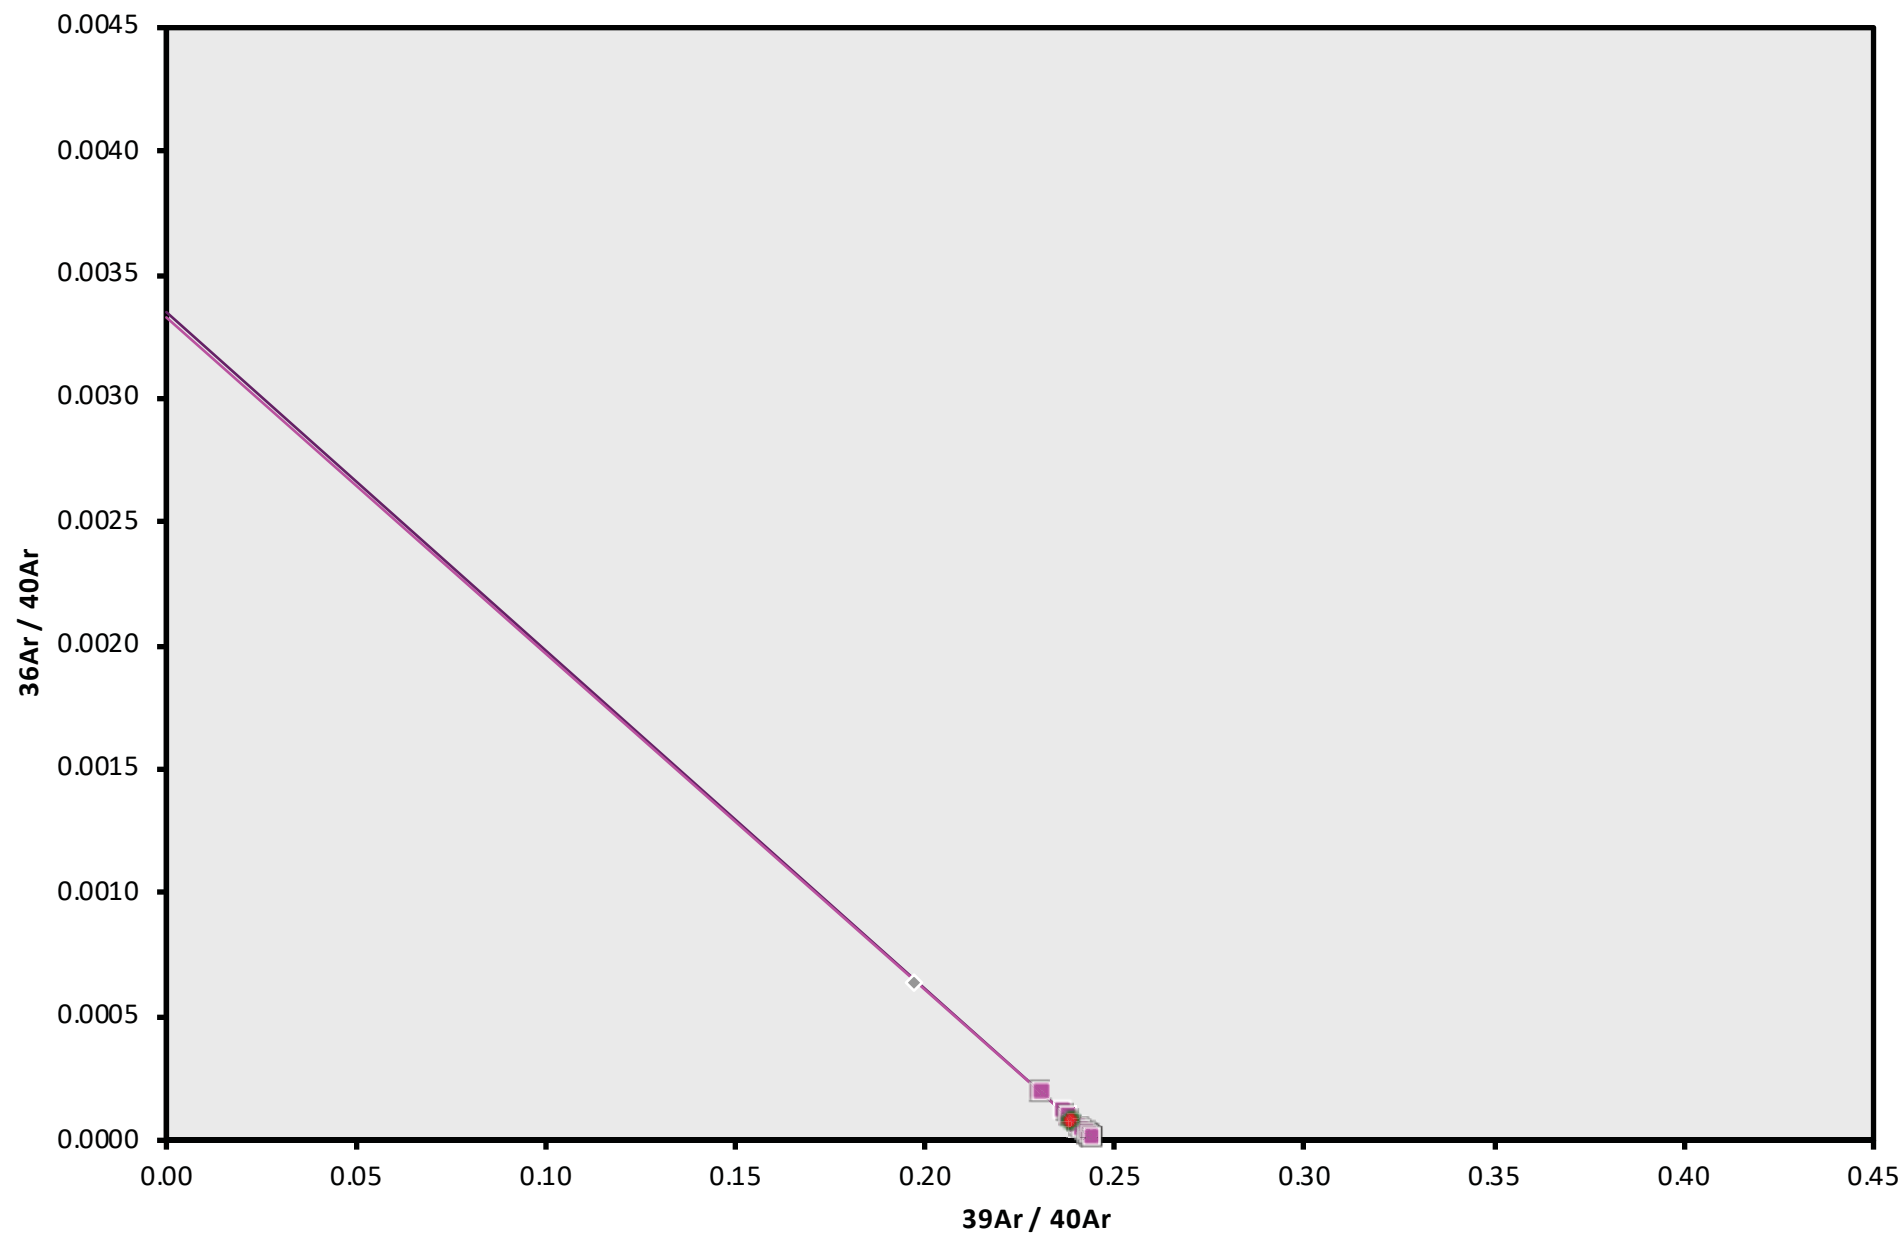

Ar-Ages in Ma

WEIGHTED PLATEAU

$11.84 \pm 0.06$

TOTAL FUSION

$11.85 \pm 0.06$

NORMAL ISOCHRON

$11.85 \pm 0.06$

INVERSE ISOCHRON

$11.84 \pm 0.06$

MSWD (PROBABILITY)

2.24 (0%)

SPREADING FACTOR

Sample Info

Sanidine

Iron Point

Dan Miggins

IRR = 19-OSU-02 (2C36-



| Relative Abundances |        | 36Ar<br>[fA] | %1σ    | 37Ar<br>[fA] | %1σ   | 38Ar<br>[fA] | %1σ   | 39Ar<br>[fA] | %1σ   | 40Ar<br>[fA] | %1σ   | 40(r)/39(k) ± 2σ | Age ± 2σ<br>(Ma) | 40Ar(r)<br>(%) | 39Ar(k)<br>(%) | K/Ca ± 2σ |
|---------------------|--------|--------------|--------|--------------|-------|--------------|-------|--------------|-------|--------------|-------|------------------|------------------|----------------|----------------|-----------|
| 20F11338            | 17.0 % | 0.0889287    | 0.632  | 118.81047    | 0.178 | 0.75291      | 1.267 | 60.548       | 0.047 | 232.448      | 0.012 | 3.56279 ±0.00663 | 10.61 ±0.02      | 92.69          | 0.54           | 0.2 ±0.0  |
| 20F11339            | 17.0 % | ✓ 0.0300446  | 1.809  | 7.88467      | 0.305 | 9.14888      | 0.143 | 764.261      | 0.043 | 2724.738     | 0.003 | 3.55371 ±0.00311 | 10.58 ±0.01      | 99.68          | 6.85           | 41.7 ±0.3 |
| 20F11341            | 17.0 % | ✓ 0.0014707  | 26.797 | 4.84910      | 0.446 | 5.79458      | 0.185 | 483.332      | 0.043 | 1716.287     | 0.004 | 3.55027 ±0.00313 | 10.57 ±0.01      | 99.98          | 4.33           | 42.9 ±0.4 |
| 20F11342            | 17.0 % | ✓ 0.0082962  | 5.080  | 6.95865      | 0.333 | 6.08629      | 0.180 | 506.994      | 0.043 | 1803.066     | 0.003 | 3.55203 ±0.00313 | 10.58 ±0.01      | 99.88          | 4.54           | 31.3 ±0.2 |
| 20F11344            | 17.0 % | ✓ 0.0032749  | 12.245 | 3.38679      | 0.571 | 4.63392      | 0.232 | 386.983      | 0.043 | 1375.212     | 0.004 | 3.55127 ±0.00316 | 10.57 ±0.01      | 99.93          | 3.47           | 49.1 ±0.6 |
| 20F11345            | 17.0 % | ✓ 0.0120493  | 3.361  | 4.77913      | 0.423 | 5.41805      | 0.204 | 450.597      | 0.043 | 1602.224     | 0.004 | 3.54807 ±0.00314 | 10.56 ±0.01      | 99.78          | 4.04           | 40.5 ±0.3 |
| 20F11347            | 17.0 % | ✓ 0.0192543  | 2.413  | 6.40707      | 0.361 | 6.39230      | 0.172 | 533.468      | 0.043 | 1900.210     | 0.003 | 3.55161 ±0.00314 | 10.58 ±0.01      | 99.71          | 4.78           | 35.8 ±0.3 |
| 20F11348            | 17.0 % | 0.0470791    | 1.028  | 86.75036     | 0.179 | 0.37843      | 2.509 | 32.073       | 0.055 | 123.086      | 0.022 | 3.62344 ±0.01010 | 10.79 ±0.03      | 94.25          | 0.29           | 0.2 ±0.0  |
| 20F11350            | 17.0 % | ✓ 0.1384191  | 0.508  | 7.80555      | 0.298 | 8.36458      | 0.142 | 695.742      | 0.043 | 2512.503     | 0.003 | 3.55218 ±0.00314 | 10.58 ±0.01      | 98.36          | 6.23           | 38.3 ±0.2 |
| 20F11351            | 17.0 % | ✓ 0.00557871 | 7.246  | 6.21769      | 0.353 | 5.96154      | 0.189 | 498.082      | 0.043 | 1771.119     | 0.004 | 3.55284 ±0.00313 | 10.58 ±0.01      | 99.91          | 4.46           | 34.4 ±0.2 |
| 20F11353            | 17.0 % | ✓ 0.2685988  | 0.347  | 3.75757      | 0.521 | 4.72664      | 0.208 | 389.756      | 0.043 | 1463.651     | 0.004 | 3.54974 ±0.00344 | 10.57 ±0.01      | 94.53          | 3.49           | 44.6 ±0.5 |
| 20F11354            | 17.0 % | ✓ 0.0095692  | 4.332  | 4.74528      | 0.404 | 5.54702      | 0.191 | 462.920      | 0.043 | 1648.577     | 0.004 | 3.55533 ±0.00314 | 10.59 ±0.01      | 99.83          | 4.15           | 41.9 ±0.3 |
| 20F11356            | 17.0 % | ✓ 0.0005869  | 65.330 | 5.75131      | 0.349 | 6.35408      | 0.174 | 531.574      | 0.043 | 1887.445     | 0.003 | 3.55063 ±0.00312 | 10.57 ±0.01      | 100.00         | 4.76           | 39.7 ±0.3 |
| 20F11357            | 17.0 % | ✓ 0.0024425  | 15.614 | 4.64461      | 0.425 | 5.28710      | 0.204 | 440.009      | 0.043 | 1564.218     | 0.004 | 3.55358 ±0.00315 | 10.58 ±0.01      | 99.96          | 3.94           | 40.7 ±0.3 |
| 20F11359            | 17.0 % | ✓ 0.0182855  | 2.100  | 3.07700      | 0.623 | 3.03809      | 0.317 | 253.273      | 0.044 | 903.915      | 0.005 | 3.54779 ±0.00325 | 10.56 ±0.01      | 99.41          | 2.27           | 35.4 ±0.4 |
| 20F11360            | 17.0 % | ✓ 0.0067188  | 5.429  | 2.87146      | 0.684 | 3.85245      | 0.259 | 323.513      | 0.043 | 1150.679     | 0.004 | 3.55076 ±0.00318 | 10.57 ±0.01      | 99.83          | 2.90           | 48.4 ±0.7 |
| 20F11362            | 17.0 % | ✓ 0.0088077  | 4.064  | 3.65055      | 0.544 | 4.17365      | 0.250 | 348.735      | 0.043 | 1240.553     | 0.004 | 3.55002 ±0.00316 | 10.57 ±0.01      | 99.79          | 3.12           | 41.1 ±0.4 |
| 20F11363            | 17.0 % | ✓ 0.0192769  | 2.135  | 4.33062      | 0.489 | 5.41260      | 0.192 | 452.069      | 0.043 | 1610.687     | 0.004 | 3.55038 ±0.00314 | 10.57 ±0.01      | 99.65          | 4.05           | 44.9 ±0.4 |
| 20F11365            | 17.0 % | ✓ 0.0125134  | 3.395  | 4.06843      | 0.518 | 4.50979      | 0.233 | 376.156      | 0.044 | 1338.632     | 0.004 | 3.54907 ±0.00318 | 10.57 ±0.01      | 99.73          | 3.37           | 39.8 ±0.4 |
| 20F11366            | 17.0 % | ✓ 0.0650040  | 0.893  | 5.47804      | 0.393 | 6.00215      | 0.182 | 500.162      | 0.043 | 1796.215     | 0.004 | 3.55277 ±0.00317 | 10.58 ±0.01      | 98.93          | 4.48           | 39.3 ±0.3 |
| 20F11368            | 17.0 % | ✓ 0.0144609  | 2.839  | 4.25227      | 0.538 | 5.42764      | 0.198 | 454.345      | 0.043 | 1617.255     | 0.004 | 3.55020 ±0.00314 | 10.57 ±0.01      | 99.74          | 4.07           | 45.9 ±0.5 |
| 20F11369            | 17.0 % | ✓ 0.0032912  | 10.246 | 2.60106      | 0.825 | 3.45560      | 0.286 | 289.905      | 0.044 | 1030.597     | 0.004 | 3.55169 ±0.00320 | 10.58 ±0.01      | 99.91          | 2.60           | 47.9 ±0.8 |
| 20F11371            | 17.0 % | ✓ 0.0079876  | 5.204  | 3.33960      | 0.624 | 3.70717      | 0.249 | 306.401      | 0.043 | 1090.616     | 0.004 | 3.55195 ±0.00321 | 10.58 ±0.01      | 99.79          | 2.74           | 39.5 ±0.5 |
| 20F11372            | 17.0 % | ✓ 0.0128208  | 3.200  | 3.78811      | 0.554 | 4.94416      | 0.212 | 411.863      | 0.043 | 1465.442     | 0.004 | 3.54895 ±0.00316 | 10.57 ±0.01      | 99.74          | 3.69           | 46.8 ±0.5 |
| 20F11374            | 17.0 % | ✓ 0.0157751  | 2.619  | 1.30129      | 1.432 | 1.72418      | 0.558 | 143.665      | 0.044 | 514.975      | 0.007 | 3.55191 ±0.00361 | 10.58 ±0.01      | 99.09          | 1.29           | 47.5 ±1.4 |
| 20F11375            | 17.0 % | ✓ 0.0052465  | 7.285  | 3.01036      | 0.651 | 3.20588      | 0.317 | 266.789      | 0.044 | 947.971      | 0.005 | 3.54772 ±0.00325 | 10.56 ±0.01      | 99.84          | 2.39           | 38.1 ±0.5 |
| 20F11377            | 17.0 % | ✓ 0.0026471  | 13.430 | 2.91606      | 0.681 | 3.12159      | 0.295 | 261.488      | 0.044 | 928.452      | 0.005 | 3.54794 ±0.00323 | 10.56 ±0.01      | 99.92          | 2.34           | 38.6 ±0.5 |
| 20F11378            | 17.0 % | ✓ 0.0012807  | 27.882 | 2.02788      | 0.998 | 2.50734      | 0.388 | 209.876      | 0.044 | 745.473      | 0.005 | 3.55035 ±0.00330 | 10.57 ±0.01      | 99.95          | 1.88           | 44.5 ±0.9 |
| 20F11380            | 17.0 % | ✓ 0.0013320  | 25.826 | 1.22778      | 1.553 | 1.60470      | 0.575 | 134.297      | 0.045 | 476.628      | 0.007 | 3.54625 ±0.00356 | 10.56 ±0.01      | 99.92          | 1.20           | 47.0 ±1.5 |
| 20F11381            | 17.0 % | ✓ 0.0047394  | 7.119  | 2.12577      | 0.912 | 2.34267      | 0.425 | 196.218      | 0.044 | 697.886      | 0.006 | 3.54977 ±0.00331 | 10.57 ±0.01      | 99.80          | 1.76           | 39.7 ±0.7 |
| Σ                   |        | 0.8359891    | 0.299  | 322.81452    | 0.088 | 133.87599    | 0.043 | 11165.093    | 0.009 | 39880.759    | 0.001 |                  |                  |                |                |           |

Information on Analysis  
and Constants Used in Calculations

Project = **SWENTON (18-58)**  
Sample = **VS17-046B**  
Material = **Sanidine**  
Location = **Iron Point**  
Region = **Eastern Oregon**  
Analyst = **Dan Miggins**  
Irradiation = **20-OSU-01 (1C31-20)**  
Position = **X: 0 | Y: 0 | Z/H: 40.32546 mm**  
FCT-NM Age = **28.201 ±0.023 Ma**  
FCT-NM Reference = **Kuiper et al (2008)**  
FCT-NM 40Ar/39Ar Ratio = **9.51702 ±0.01494**  
FCT-NMJ-value = **0.00163134 ±0.00000256**  
Air Shot 40Ar/36Ar = **298.6220 ±0.4091**  
Air Shot MDF = **0.99994803 ±0.00043047 (LIN)**  
Experiment Type = **Total Fusion**  
Extraction Method = **Single Crystal Laser Heating**  
Heating = **62 sec**  
Isolation = **1.62 min**  
Instrument = **ARGUS-VI-F**  
Preferred Age = **Ideogram Age**  
Age Classification = **Eruption Age**  
IGSN = **Undefined**  
Rock Class = **Undefined**  
Lithology = **Undefined**  
Lat-Lon = **Undefined - Undefined**

Age Equations = **Min et al. (2000)**  
Negative Intensities = **Allowed**  
Collector Calibrations = **36Ar**  
Decay 40K = **5.463 ±0.107 E-10 1/a**  
Decay 39Ar = **2.940 ±0.016 E-07 1/h**  
Decay 37Ar = **8.230 ±0.012 E-04 1/h**  
Decay 36Cl = **2.257 ±0.015 E-06 1/a**  
Decay 40K(EC,β<sup>+</sup>) = **0.580 ±0.014 E-10 1/a**  
Decay 40K(β<sup>-</sup>) = **4.884 ±0.099 E-10 1/a**  
Atmospheric 40/36(a) = **298.56 ±0.31**  
Atmospheric 38/36(a) = **0.1885 ±0.0003**  
Production 39/37(ca) = **0.0006425 ±0.0000059**  
Production 38/37(ca) = **0.0001800 ±0.0000173**  
Production 36/37(ca) = **0.0002703 ±0.0000005**  
Production 40/39(k) = **0.000607 ±0.000059**  
Production 38/39(k) = **0.012077 ±0.000011**  
Production 36/38(cl) = **262.80 ±1.71**  
Scaling Ratio K/Ca = **0.430**  
Abundance Ratio 40K/K = **1.1700 ±0.0100 E-04**  
Atomic Weight K = **39.0983 ±0.0001 g**

Results

40(a)/36(a) ± 2σ

40(r)/39(k) ± 2σ

Age ± 2σ  
(Ma)

M\$WD

39Ar(k)  
(%,n)

K/Ca ± 2σ

Age Plateau  
Error Mean

3.55072 ±0.00078 ±0.02%

10.57 ±0.03 ±0.31%

1.66 2% 99.17 28 39.1 ±1.7

1.54 2σ Confidence Limit

1.2887 Error Magnification

Total Fusion Age

3.55135 ±0.00063 ±0.02%

10.57 ±0.03 ±0.31%

1.71 1% 99.17 28 14.9 ±0.0

1.55 2σ Confidence Limit

1.3066 Error Magnification

1 Number of Iterations

0.0000000002 Convergence

Normal Isochron  
Error Chron

299.46 ±6.50 ±2.17%

3.55031 ±0.00087 ±0.02%

10.57 ±0.03 ±0.31%

1.71 1% 99.17 28 14.9 ±0.0

1.55 2σ Confidence Limit

1.3066 Error Magnification

1 Number of Iterations

0.0000000002 Convergence

Inverse Isochron  
Error Chron

298.27 ±6.52 ±2.18%

3.55074 ±0.00087 ±0.02%

10.57 ±0.03 ±0.31%

1.72 1% 99.17 28 14.9 ±0.0

1.55 2σ Confidence Limit

1.3133 Error Magnification

2 Number of Iterations

0.0000011009 Convergence

5% Spreading Factor

| Incremental Heating |        |   | 36Ar(a)<br>[fA] | 37Ar(ca)<br>[fA] | 38Ar(cl)<br>[fA] | 39Ar(k)<br>[fA] | 40Ar(r)<br>[fA] | Age ± 2σ<br>(Ma) | 40Ar(r)<br>(%) | 39Ar(k)<br>(%) | K/Ca ± 2σ  |
|---------------------|--------|---|-----------------|------------------|------------------|-----------------|-----------------|------------------|----------------|----------------|------------|
| 20F11338            | 17.0 % |   | 0.0568143       | 118.81047        | 0.0000000        | 60.472          | 215.449         | 10.61 ± 0.02     | 92.69          | 0.54           | 0.2 ± 0.0  |
| 20F11339            | 17.0 % | ✓ | 0.0279134       | 7.88467          | 0.0000000        | 764.256         | 2715.940        | 10.58 ± 0.01     | 99.68          | 6.85           | 41.7 ± 0.3 |
| 20F11341            | 17.0 % | ✓ | 0.0001600       | 4.84910          | 0.0000000        | 483.328         | 1715.946        | 10.57 ± 0.01     | 99.98          | 4.33           | 42.9 ± 0.4 |
| 20F11342            | 17.0 % | ✓ | 0.0064153       | 6.95865          | 0.0000000        | 506.990         | 1800.842        | 10.58 ± 0.01     | 99.88          | 4.54           | 31.3 ± 0.2 |
| 20F11344            | 17.0 % | ✓ | 0.0023595       | 3.38679          | 0.0000000        | 386.981         | 1374.272        | 10.57 ± 0.01     | 99.93          | 3.47           | 49.1 ± 0.6 |
| 20F11345            | 17.0 % | ✓ | 0.0107575       | 4.77913          | 0.0000000        | 450.594         | 1598.739        | 10.56 ± 0.01     | 99.78          | 4.04           | 40.5 ± 0.3 |
| 20F11347            | 17.0 % | ✓ | 0.0175225       | 6.40707          | 0.0000000        | 533.463         | 1894.654        | 10.58 ± 0.01     | 99.71          | 4.78           | 35.8 ± 0.3 |
| 20F11348            | 17.0 % |   | 0.0236305       | 86.75036         | 0.0000000        | 32.017          | 116.011         | 10.79 ± 0.03     | 94.25          | 0.29           | 0.2 ± 0.0  |
| 20F11350            | 17.0 % | ✓ | 0.1363092       | 7.80555          | 0.0000000        | 695.737         | 2471.385        | 10.58 ± 0.01     | 98.36          | 6.23           | 38.3 ± 0.2 |
| 20F11351            | 17.0 % | ✓ | 0.0041065       | 6.21769          | 0.0000000        | 498.078         | 1769.590        | 10.58 ± 0.01     | 99.91          | 4.46           | 34.4 ± 0.2 |
| 20F11353            | 17.0 % | ✓ | 0.2675831       | 3.75757          | 0.0000000        | 389.754         | 1383.525        | 10.57 ± 0.01     | 94.53          | 3.49           | 44.6 ± 0.5 |
| 20F11354            | 17.0 % | ✓ | 0.0082865       | 4.74528          | 0.0000000        | 462.917         | 1645.822        | 10.59 ± 0.01     | 99.83          | 4.15           | 41.9 ± 0.3 |
| 20F11356            | 17.0 % | ✓ | 0.0009677       | 5.75131          | 0.0000000        | 531.571         | 1887.411        | 10.57 ± 0.01     | 100.00         | 4.76           | 39.7 ± 0.3 |
| 20F11357            | 17.0 % | ✓ | 0.0011871       | 4.64461          | 0.0000000        | 440.006         | 1563.596        | 10.58 ± 0.01     | 99.96          | 3.94           | 40.7 ± 0.3 |
| 20F11359            | 17.0 % | ✓ | 0.0174538       | 3.07700          | 0.0000000        | 253.271         | 898.550         | 10.56 ± 0.01     | 99.41          | 2.27           | 35.4 ± 0.4 |
| 20F11360            | 17.0 % | ✓ | 0.0059427       | 2.87146          | 0.0000000        | 323.511         | 1148.709        | 10.57 ± 0.01     | 99.83          | 2.90           | 48.4 ± 0.7 |
| 20F11362            | 17.0 % | ✓ | 0.0078210       | 3.65055          | 0.0000000        | 348.732         | 1238.007        | 10.57 ± 0.01     | 99.79          | 3.12           | 41.1 ± 0.4 |
| 20F11363            | 17.0 % | ✓ | 0.0181063       | 4.33062          | 0.0000000        | 452.066         | 1605.007        | 10.57 ± 0.01     | 99.65          | 4.05           | 44.9 ± 0.4 |
| 20F11365            | 17.0 % | ✓ | 0.0114137       | 4.06843          | 0.0000000        | 376.153         | 1334.996        | 10.57 ± 0.01     | 99.73          | 3.37           | 39.8 ± 0.4 |
| 20F11366            | 17.0 % | ✓ | 0.0635233       | 5.47804          | 0.0000000        | 500.158         | 1776.946        | 10.58 ± 0.01     | 98.93          | 4.48           | 39.3 ± 0.3 |
| 20F11368            | 17.0 % | ✓ | 0.0133115       | 4.25227          | 0.0000000        | 454.342         | 1613.005        | 10.57 ± 0.01     | 99.74          | 4.07           | 45.9 ± 0.5 |
| 20F11369            | 17.0 % | ✓ | 0.0025881       | 2.60106          | 0.0000000        | 289.904         | 1029.648        | 10.58 ± 0.01     | 99.91          | 2.60           | 47.9 ± 0.8 |
| 20F11371            | 17.0 % | ✓ | 0.0070845       | 3.33960          | 0.0048461        | 306.399         | 1088.315        | 10.58 ± 0.01     | 99.79          | 2.74           | 39.5 ± 0.5 |
| 20F11372            | 17.0 % | ✓ | 0.0117968       | 3.78811          | 0.0000000        | 411.860         | 1461.670        | 10.57 ± 0.01     | 99.74          | 3.69           | 46.8 ± 0.5 |
| 20F11374            | 17.0 % | ✓ | 0.0154233       | 1.30129          | 0.0000000        | 143.664         | 510.283         | 10.58 ± 0.01     | 99.09          | 1.29           | 47.5 ± 1.4 |
| 20F11375            | 17.0 % | ✓ | 0.0044328       | 3.01036          | 0.0000000        | 266.787         | 946.486         | 10.56 ± 0.01     | 99.84          | 2.39           | 38.1 ± 0.5 |
| 20F11377            | 17.0 % | ✓ | 0.0018589       | 2.91606          | 0.0000000        | 261.486         | 927.738         | 10.56 ± 0.01     | 99.92          | 2.34           | 38.6 ± 0.5 |
| 20F11378            | 17.0 % | ✓ | 0.0007325       | 2.02788          | 0.0000000        | 209.874         | 745.127         | 10.57 ± 0.01     | 99.95          | 1.88           | 44.5 ± 0.9 |
| 20F11380            | 17.0 % | ✓ | 0.0010002       | 1.22778          | 0.0000000        | 134.296         | 476.248         | 10.56 ± 0.01     | 99.92          | 1.20           | 47.0 ± 1.5 |
| 20F11381            | 17.0 % | ✓ | 0.0041648       | 2.12577          | 0.0000000        | 196.217         | 696.523         | 10.57 ± 0.01     | 99.80          | 1.76           | 39.7 ± 0.7 |
| Σ                   |        |   | 0.7487320       | 322.81452        | 0.0048461        | 11164.885       | 39650.440       |                  |                |                |            |

| Information on Analysis                                                                                                                                                                                                                               | Results          | 40(r)/39(k) ± 2σ | Age ± 2σ<br>(Ma)    | MSWD   | 39Ar(k)<br>(%,n)    | K/Ca ± 2σ  |
|-------------------------------------------------------------------------------------------------------------------------------------------------------------------------------------------------------------------------------------------------------|------------------|------------------|---------------------|--------|---------------------|------------|
| Project = SWENTON (18-58)<br>Sample = VS17-046B<br>Material = Sanidine<br>Location = Iron Point<br>Region = Eastern Oregon<br>Analyst = Dan Miggins<br>Irradiation = 20-OSU-01 (1C31-20)<br>J = 0.00163134 ± 0.00000256<br>FCT-NM = 28.201 ± 0.023 Ma | Age Plateau      | 3.55072          | ± 0.00078           | 1.66   | 99.17               | 39.1 ± 1.7 |
|                                                                                                                                                                                                                                                       | Error Mean       |                  | ± 0.02%             | 2%     | 28                  |            |
|                                                                                                                                                                                                                                                       |                  |                  | Full External Error | 1.54   | 2σ Confidence Limit |            |
|                                                                                                                                                                                                                                                       |                  |                  | Analytical Error    | 1.2887 | Error Magnification |            |
|                                                                                                                                                                                                                                                       | Total Fusion Age | 3.55135          | ± 0.00063           |        | 30                  | 14.9 ± 0.0 |
|                                                                                                                                                                                                                                                       |                  |                  | ± 0.02%             |        |                     |            |
|                                                                                                                                                                                                                                                       |                  |                  | Full External Error |        |                     |            |
|                                                                                                                                                                                                                                                       |                  |                  | Analytical Error    |        |                     |            |

| Normal Isochron |        |   | 39(k)/36(a) ± 2σ         | 40(a+r)/36(a) ± 2σ        | r.i.   |
|-----------------|--------|---|--------------------------|---------------------------|--------|
| 20F11338        | 17.0 % |   | 1064.38 ± 21.30          | 4090.72 ± 81.76           | 0.9988 |
| 20F11339        | 17.0 % | ✓ | 27379.55 ± 1066.75       | 97597.43 ± 3801.60        | 0.9998 |
| 20F11341        | 17.0 % | ✓ | 3020979.29 ± 14885099.25 | 10725585.10 ± 52847563.95 | 1.0000 |
| 20F11342        | 17.0 % | ✓ | 79027.94 ± 10384.20      | 281008.24 ± 36923.42      | 1.0000 |
| 20F11344        | 17.0 % | ✓ | 164010.59 ± 55756.37     | 582744.46 ± 198106.78     | 1.0000 |
| 20F11345        | 17.0 % | ✓ | 41886.53 ± 3154.13       | 148914.84 ± 11212.82      | 0.9999 |
| 20F11347        | 17.0 % | ✓ | 30444.46 ± 1614.55       | 108425.44 ± 5749.34       | 0.9999 |
| 20F11348        | 17.0 % |   | 1354.90 ± 55.92          | 5207.95 ± 214.89          | 0.9996 |
| 20F11350        | 17.0 % | ✓ | 5104.11 ± 52.81          | 18429.28 ± 190.03         | 0.9965 |
| 20F11351        | 17.0 % | ✓ | 121290.10 ± 24773.91     | 431222.76 ± 88077.93      | 1.0000 |
| 20F11353        | 17.0 % | ✓ | 1456.57 ± 10.23          | 5469.01 ± 38.14           | 0.9923 |
| 20F11354        | 17.0 % | ✓ | 55863.91 ± 5589.51       | 198913.30 ± 19901.69      | 1.0000 |
| 20F11356        | 17.0 % | ✓ | 549330.40 ± 435381.42    | 1950170.82 ± 1545641.11   | 1.0000 |
| 20F11357        | 17.0 % | ✓ | 370662.14 ± 238187.84    | 1317475.25 ± 846610.08    | 1.0000 |
| 20F11359        | 17.0 % | ✓ | 14510.94 ± 638.67        | 51780.30 ± 2278.55        | 0.9998 |
| 20F11360        | 17.0 % | ✓ | 54438.41 ± 6683.33       | 193596.27 ± 23766.95      | 1.0000 |
| 20F11362        | 17.0 % | ✓ | 44589.40 ± 4082.35       | 158591.74 ± 14519.10      | 1.0000 |
| 20F11363        | 17.0 % | ✓ | 24967.32 ± 1135.18       | 88942.01 ± 4043.15        | 0.9998 |
| 20F11365        | 17.0 % | ✓ | 32956.31 ± 2453.47       | 117262.89 ± 8729.18       | 0.9999 |
| 20F11366        | 17.0 % | ✓ | 7873.61 ± 143.99         | 28271.68 ± 516.46         | 0.9989 |
| 20F11368        | 17.0 % | ✓ | 34131.52 ± 2105.69       | 121472.19 ± 7493.28       | 0.9999 |
| 20F11369        | 17.0 % | ✓ | 112014.58 ± 29194.43     | 398139.80 ± 103766.85     | 1.0000 |
| 20F11371        | 17.0 % | ✓ | 43249.08 ± 5075.71       | 153917.14 ± 18063.22      | 1.0000 |
| 20F11372        | 17.0 % | ✓ | 34912.79 ± 2428.43       | 124202.14 ± 8638.47       | 0.9999 |
| 20F11374        | 17.0 % | ✓ | 9314.75 ± 499.12         | 33383.74 ± 1788.58        | 0.9999 |
| 20F11375        | 17.0 % | ✓ | 60184.62 ± 10380.23      | 213816.91 ± 36877.21      | 1.0000 |
| 20F11377        | 17.0 % | ✓ | 140670.65 ± 53811.13     | 499389.60 ± 191032.39     | 1.0000 |
| 20F11378        | 17.0 % | ✓ | 286502.23 ± 279350.70    | 1017481.21 ± 992082.93    | 1.0000 |
| 20F11380        | 17.0 % | ✓ | 134272.14 ± 92376.72     | 476460.47 ± 327795.62     | 1.0000 |
| 20F11381        | 17.0 % | ✓ | 47113.08 ± 7634.38       | 167539.03 ± 27148.28      | 1.0000 |

| Results         | 40(a)/36(a) ± 2σ      | 40(r)/39(k) ± 2σ  | Age ± 2σ (Ma)              | MSWD            |
|-----------------|-----------------------|-------------------|----------------------------|-----------------|
| Normal Isochron | 299.46 ± 6.50         | 3.55031 ± 0.00087 | 10.57 ± 0.03               | 1.71            |
| Error Chron     | ± 2.17%               | ± 0.02%           | ± 0.31%                    | 1%              |
|                 |                       |                   | Full External Error ± 0.55 |                 |
|                 |                       |                   | Analytical Error ± 0.00    |                 |
|                 |                       |                   |                            |                 |
| Statistics      | 2σ Confidence Limit   | 1.55              | Convergence                | 0.000000000194  |
|                 | Error Magnification   | 1.3066            | Number of Iterations       | 1               |
|                 | Number of Data Points | 28                | Calculated Line            | Weighted York-2 |

| Inverse Isochron |        | 39(k)/40(a+r) ± 2σ |                      | 36(a)/40(a+r) ± 2σ     |  | r.i.   |
|------------------|--------|--------------------|----------------------|------------------------|--|--------|
| 20F11338         | 17.0 % |                    | 0.2601937 ±0.0002541 | 0.00024446 ±0.00000489 |  | 0.0029 |
| 20F11339         | 17.0 % | ✓                  | 0.2805356 ±0.0002429 | 0.00001025 ±0.00000040 |  | 0.0001 |
| 20F11341         | 17.0 % | ✓                  | 0.2816610 ±0.0002450 | 0.00000009 ±0.00000046 |  | 0.0000 |
| 20F11342         | 17.0 % | ✓                  | 0.2812300 ±0.0002448 | 0.00000356 ±0.00000047 |  | 0.0000 |
| 20F11344         | 17.0 % | ✓                  | 0.2814451 ±0.0002459 | 0.00000172 ±0.00000058 |  | 0.0000 |
| 20F11345         | 17.0 % | ✓                  | 0.2812784 ±0.0002451 | 0.00000672 ±0.00000051 |  | 0.0001 |
| 20F11347         | 17.0 % | ✓                  | 0.2807871 ±0.0002446 | 0.00000922 ±0.00000049 |  | 0.0001 |
| 20F11348         | 17.0 % |                    | 0.2601595 ±0.0003110 | 0.00019201 ±0.00000792 |  | 0.0041 |
| 20F11350         | 17.0 % | ✓                  | 0.2769565 ±0.0002400 | 0.00005426 ±0.00000056 |  | 0.0004 |
| 20F11351         | 17.0 % | ✓                  | 0.2812702 ±0.0002449 | 0.00000232 ±0.00000047 |  | 0.0000 |
| 20F11353         | 17.0 % | ✓                  | 0.2663319 ±0.0002325 | 0.00018285 ±0.00000128 |  | 0.0012 |
| 20F11354         | 17.0 % | ✓                  | 0.2808455 ±0.0002445 | 0.00000503 ±0.00000050 |  | 0.0001 |
| 20F11356         | 17.0 % | ✓                  | 0.2816832 ±0.0002451 | 0.00000051 ±0.00000041 |  | 0.0000 |
| 20F11357         | 17.0 % | ✓                  | 0.2813428 ±0.0002457 | 0.00000076 ±0.00000049 |  | 0.0000 |
| 20F11359         | 17.0 % | ✓                  | 0.2802406 ±0.0002468 | 0.00001931 ±0.00000085 |  | 0.0003 |
| 20F11360         | 17.0 % | ✓                  | 0.2811955 ±0.0002458 | 0.00000517 ±0.00000063 |  | 0.0001 |
| 20F11362         | 17.0 % | ✓                  | 0.2811584 ±0.0002458 | 0.00000631 ±0.00000058 |  | 0.0001 |
| 20F11363         | 17.0 % | ✓                  | 0.2807145 ±0.0002444 | 0.00001124 ±0.00000051 |  | 0.0002 |
| 20F11365         | 17.0 % | ✓                  | 0.2810464 ±0.0002457 | 0.00000853 ±0.00000063 |  | 0.0001 |
| 20F11366         | 17.0 % | ✓                  | 0.2784982 ±0.0002421 | 0.00003537 ±0.00000065 |  | 0.0004 |
| 20F11368         | 17.0 % | ✓                  | 0.2809822 ±0.0002452 | 0.00000823 ±0.00000051 |  | 0.0001 |
| 20F11369         | 17.0 % | ✓                  | 0.2813448 ±0.0002473 | 0.00000251 ±0.00000065 |  | 0.0000 |
| 20F11371         | 17.0 % | ✓                  | 0.2809894 ±0.0002456 | 0.00000650 ±0.00000076 |  | 0.0001 |
| 20F11372         | 17.0 % | ✓                  | 0.2810965 ±0.0002455 | 0.00000805 ±0.00000056 |  | 0.0001 |
| 20F11374         | 17.0 % | ✓                  | 0.2790207 ±0.0002497 | 0.00002995 ±0.00000160 |  | 0.0004 |
| 20F11375         | 17.0 % | ✓                  | 0.2814774 ±0.0002483 | 0.00000468 ±0.00000081 |  | 0.0001 |
| 20F11377         | 17.0 % | ✓                  | 0.2816852 ±0.0002479 | 0.00000200 ±0.00000077 |  | 0.0000 |
| 20F11378         | 17.0 % | ✓                  | 0.2815799 ±0.0002493 | 0.00000098 ±0.00000096 |  | 0.0000 |
| 20F11380         | 17.0 % | ✓                  | 0.2818117 ±0.0002551 | 0.00000210 ±0.00000144 |  | 0.0000 |
| 20F11381         | 17.0 % | ✓                  | 0.2812066 ±0.0002492 | 0.00000597 ±0.00000097 |  | 0.0001 |

| Results          | 40(a)/36(a) ± 2σ      |        | 40(r)/39(k) ± 2σ     |          | Age ± 2σ (Ma)             | MSWD |
|------------------|-----------------------|--------|----------------------|----------|---------------------------|------|
| Inverse Isochron | 298.27                | ±6.52  | 3.55074              | ±0.00087 | 10.57 ±0.03               | 1.72 |
| Error Chron      |                       | ±2.18% |                      | ±0.02%   | ±0.31%                    | 1%   |
|                  |                       |        |                      |          | Full External Error ±0.55 |      |
|                  |                       |        |                      |          | Analytical Error ±0.00    |      |
|                  |                       |        |                      |          |                           |      |
| Statistics       | 2σ Confidence Limit   | 1.55   | Convergence          |          | 0.0000011009              |      |
|                  | Error Magnification   | 1.3133 | Number of Iterations |          | 2                         |      |
|                  | Number of Data Points | 28     | Calculated Line      |          | Weighted York-2           |      |
|                  | Spreading Factor      | 5.5%   |                      |          |                           |      |

| Degassing Patterns |        | 36Ar(a)<br>[fA] | %1σ    | 36Ar(c)<br>[fA] | %1σ  | 36Ar(ca)<br>[fA] | %1σ  | 36Ar(cl)<br>[fA] | %1σ    | 37Ar(ca)<br>[fA] | %1σ  | 38Ar(a)<br>[fA] | %1σ    | 38Ar(c)<br>[fA] | %1σ  | 38Ar(k)<br>[fA] | %1σ  | 38Ar(ca)<br>[fA] | %1σ  | 38Ar(cl)<br>[fA] | %1σ    | 39Ar(k)<br>[fA] | %1σ  | 39Ar(ca)<br>[fA] | %1σ  |
|--------------------|--------|-----------------|--------|-----------------|------|------------------|------|------------------|--------|------------------|------|-----------------|--------|-----------------|------|-----------------|------|------------------|------|------------------|--------|-----------------|------|------------------|------|
| 20F11338           | 17.0 % | 0.0568143       | 1.00   | 0.0000000       | 0.00 | 0.0321145        | 0.25 | 0.0000000        | 0.00   | 118.81047        | 0.18 | 0.0107095       | 1.01   | 0.0000000       | 0.00 | 0.73032         | 0.10 | 0.0213859        | 9.63 | 0.0000000        | 0.00   | 60.472          | 0.05 | 0.0763357        | 0.94 |
| 20F11339           | 17.0 % | ✓ 0.0279134     | 1.95   | 0.0000000       | 0.00 | 0.0021312        | 0.35 | 0.0000000        | 0.00   | 7.88467          | 0.30 | 0.0052617       | 1.95   | 0.0000000       | 0.00 | 9.22992         | 0.10 | 0.0014192        | 9.63 | 0.0000000        | 0.00   | 764.256         | 0.04 | 0.0050659        | 0.97 |
| 20F11341           | 17.0 % | ✓ 0.0001600     | 246.36 | 0.0000000       | 0.00 | 0.0013107        | 0.48 | 0.0000000        | 0.00   | 4.84910          | 0.45 | 0.0000302       | 246.36 | 0.0000000       | 0.00 | 5.83716         | 0.10 | 0.0008728        | 9.64 | 0.0000000        | 0.00   | 483.328         | 0.04 | 0.0031155        | 1.02 |
| 20F11342           | 17.0 % | ✓ 0.0064153     | 6.57   | 0.0000000       | 0.00 | 0.0018809        | 0.37 | 0.0000000        | 0.00   | 6.95865          | 0.33 | 0.0012093       | 6.57   | 0.0000000       | 0.00 | 6.12291         | 0.10 | 0.0012526        | 9.64 | 0.0000000        | 0.00   | 506.990         | 0.04 | 0.0044709        | 0.98 |
| 20F11344           | 17.0 % | ✓ 0.0023595     | 17.00  | 0.0000000       | 0.00 | 0.0009154        | 0.60 | 0.0000000        | 0.00   | 3.38679          | 0.57 | 0.0004448       | 17.00  | 0.0000000       | 0.00 | 4.67356         | 0.10 | 0.0006096        | 9.65 | 0.0000000        | 0.00   | 386.981         | 0.04 | 0.0021760        | 1.08 |
| 20F11345           | 17.0 % | ✓ 0.0107575     | 3.76   | 0.0000000       | 0.00 | 0.0012918        | 0.46 | 0.0000000        | 0.00   | 4.77913          | 0.42 | 0.0020278       | 3.77   | 0.0000000       | 0.00 | 5.44183         | 0.10 | 0.0008602        | 9.64 | 0.0000000        | 0.00   | 450.594         | 0.04 | 0.0030706        | 1.01 |
| 20F11347           | 17.0 % | ✓ 0.0175225     | 2.65   | 0.0000000       | 0.00 | 0.0017318        | 0.40 | 0.0000000        | 0.00   | 6.40707          | 0.36 | 0.0033030       | 2.66   | 0.0000000       | 0.00 | 6.44264         | 0.10 | 0.0011533        | 9.64 | 0.0000000        | 0.00   | 533.463         | 0.04 | 0.0041165        | 0.99 |
| 20F11348           | 17.0 % | 0.0236305       | 2.06   | 0.0000000       | 0.00 | 0.0234486        | 0.25 | 0.0000000        | 0.00   | 86.75036         | 0.18 | 0.0044544       | 2.07   | 0.0000000       | 0.00 | 0.38667         | 0.11 | 0.0156151        | 9.63 | 0.0000000        | 0.00   | 32.017          | 0.06 | 0.0557371        | 0.94 |
| 20F11350           | 17.0 % | ✓ 0.1363092     | 0.52   | 0.0000000       | 0.00 | 0.0021098        | 0.34 | 0.0000000        | 0.00   | 7.80555          | 0.30 | 0.0256943       | 0.54   | 0.0000000       | 0.00 | 8.40242         | 0.10 | 0.0014050        | 9.63 | 0.0000000        | 0.00   | 695.737         | 0.04 | 0.0050151        | 0.97 |
| 20F11351           | 17.0 % | ✓ 0.0041065     | 10.21  | 0.0000000       | 0.00 | 0.0016806        | 0.39 | 0.0000000        | 0.00   | 6.21769          | 0.35 | 0.0007741       | 10.21  | 0.0000000       | 0.00 | 6.01529         | 0.10 | 0.0011192        | 9.64 | 0.0000000        | 0.00   | 498.078         | 0.04 | 0.0039949        | 0.99 |
| 20F11353           | 17.0 % | ✓ 0.2675831     | 0.35   | 0.0000000       | 0.00 | 0.0010157        | 0.55 | 0.0000000        | 0.00   | 3.75757          | 0.52 | 0.0504394       | 0.38   | 0.0000000       | 0.00 | 4.70706         | 0.10 | 0.0006764        | 9.64 | 0.0000000        | 0.00   | 389.754         | 0.04 | 0.0024142        | 1.06 |
| 20F11354           | 17.0 % | ✓ 0.0082865     | 5.00   | 0.0000000       | 0.00 | 0.0012826        | 0.44 | 0.0000000        | 0.00   | 4.74528          | 0.40 | 0.0015620       | 5.01   | 0.0000000       | 0.00 | 5.59064         | 0.10 | 0.0008541        | 9.64 | 0.0000000        | 0.00   | 462.917         | 0.04 | 0.0030488        | 1.00 |
| 20F11356           | 17.0 % | ✓ 0.0009677     | 39.63  | 0.0000000       | 0.00 | 0.0015546        | 0.39 | 0.0000000        | 0.00   | 5.75131          | 0.35 | 0.0001824       | 39.63  | 0.0000000       | 0.00 | 6.41978         | 0.10 | 0.0010352        | 9.64 | 0.0000000        | 0.00   | 531.571         | 0.04 | 0.0036952        | 0.98 |
| 20F11357           | 17.0 % | ✓ 0.0011871     | 32.13  | 0.0000000       | 0.00 | 0.0012554        | 0.46 | 0.0000000        | 0.00   | 4.64461          | 0.43 | 0.0002238       | 32.13  | 0.0000000       | 0.00 | 5.31396         | 0.10 | 0.0008360        | 9.64 | 0.0000000        | 0.00   | 440.006         | 0.04 | 0.0029842        | 1.01 |
| 20F11359           | 17.0 % | ✓ 0.0174538     | 2.20   | 0.0000000       | 0.00 | 0.0008317        | 0.65 | 0.0000000        | 0.00   | 3.07700          | 0.62 | 0.0032900       | 2.21   | 0.0000000       | 0.00 | 3.05875         | 0.10 | 0.0005539        | 9.65 | 0.0000000        | 0.00   | 253.271         | 0.04 | 0.0019770        | 1.11 |
| 20F11360           | 17.0 % | ✓ 0.0059427     | 6.14   | 0.0000000       | 0.00 | 0.0007762        | 0.70 | 0.0000000        | 0.00   | 2.87146          | 0.68 | 0.0011202       | 6.14   | 0.0000000       | 0.00 | 3.90704         | 0.10 | 0.0005169        | 9.65 | 0.0000000        | 0.00   | 323.511         | 0.04 | 0.0018449        | 1.15 |
| 20F11362           | 17.0 % | ✓ 0.0078210     | 4.58   | 0.0000000       | 0.00 | 0.0009867        | 0.57 | 0.0000000        | 0.00   | 3.65055          | 0.54 | 0.0014743       | 4.58   | 0.0000000       | 0.00 | 4.21164         | 0.10 | 0.0006571        | 9.65 | 0.0000000        | 0.00   | 348.732         | 0.04 | 0.0023455        | 1.07 |
| 20F11363           | 17.0 % | ✓ 0.0181063     | 2.27   | 0.0000000       | 0.00 | 0.0011706        | 0.52 | 0.0000000        | 0.00   | 4.33062          | 0.49 | 0.0034130       | 2.28   | 0.0000000       | 0.00 | 5.45960         | 0.10 | 0.0007795        | 9.64 | 0.0000000        | 0.00   | 452.066         | 0.04 | 0.0027824        | 1.04 |
| 20F11365           | 17.0 % | ✓ 0.0114137     | 3.72   | 0.0000000       | 0.00 | 0.0010997        | 0.54 | 0.0000000        | 0.00   | 4.06843          | 0.52 | 0.0021515       | 3.73   | 0.0000000       | 0.00 | 4.54280         | 0.10 | 0.0007323        | 9.64 | 0.0000000        | 0.00   | 376.153         | 0.04 | 0.0026140        | 1.06 |
| 20F11366           | 17.0 % | ✓ 0.0635233     | 0.91   | 0.0000000       | 0.00 | 0.0014807        | 0.43 | 0.0000000        | 0.00   | 5.47804          | 0.39 | 0.0119741       | 0.93   | 0.0000000       | 0.00 | 6.04041         | 0.10 | 0.0009860        | 9.64 | 0.0000000        | 0.00   | 500.158         | 0.04 | 0.0035196        | 1.00 |
| 20F11368           | 17.0 % | ✓ 0.0133115     | 3.08   | 0.0000000       | 0.00 | 0.0011494        | 0.56 | 0.0000000        | 0.00   | 4.25227          | 0.54 | 0.0025092       | 3.09   | 0.0000000       | 0.00 | 5.48709         | 0.10 | 0.0007654        | 9.65 | 0.0000000        | 0.00   | 454.342         | 0.04 | 0.0027321        | 1.07 |
| 20F11369           | 17.0 % | ✓ 0.0025881     | 13.03  | 0.0000000       | 0.00 | 0.0007031        | 0.84 | 0.0000000        | 0.00   | 2.60106          | 0.83 | 0.0004879       | 13.03  | 0.0000000       | 0.00 | 3.50117         | 0.10 | 0.0004682        | 9.67 | 0.0000000        | 0.00   | 289.904         | 0.04 | 0.0016712        | 1.24 |
| 20F11371           | 17.0 % | ✓ 0.0070845     | 5.87   | 0.0000000       | 0.00 | 0.0009027        | 0.65 | 0.0000003        | 267.87 | 3.33960          | 0.62 | 0.0013354       | 5.87   | 0.0000000       | 0.00 | 3.70038         | 0.10 | 0.0006011        | 9.65 | 0.0048461        | 267.88 | 306.399         | 0.04 | 0.0021457        | 1.11 |
| 20F11372           | 17.0 % | ✓ 0.0117968     | 3.48   | 0.0000000       | 0.00 | 0.0010239        | 0.58 | 0.0000000        | 0.00   | 3.78811          | 0.55 | 0.0022237       | 3.48   | 0.0000000       | 0.00 | 4.97404         | 0.10 | 0.0006819        | 9.65 | 0.0000000        | 0.00   | 411.860         | 0.04 | 0.0024339        | 1.07 |
| 20F11374           | 17.0 % | ✓ 0.0154233     | 2.68   | 0.0000000       | 0.00 | 0.0003517        | 1.44 | 0.0000000        | 0.00   | 1.30129          | 1.43 | 0.0029073       | 2.68   | 0.0000000       | 0.00 | 1.73503         | 0.10 | 0.0002342        | 9.74 | 0.0000000        | 0.00   | 143.664         | 0.04 | 0.0008361        | 1.70 |
| 20F11375           | 17.0 % | ✓ 0.0044328     | 8.62   | 0.0000000       | 0.00 | 0.0008137        | 0.67 | 0.0000000        | 0.00   | 3.01036          | 0.65 | 0.0008356       | 8.63   | 0.0000000       | 0.00 | 3.22198         | 0.10 | 0.0005419        | 9.65 | 0.0000000        | 0.00   | 266.787         | 0.04 | 0.0019342        | 1.13 |
| 20F11377           | 17.0 % | ✓ 0.0018589     | 19.13  | 0.0000000       | 0.00 | 0.0007882        | 0.70 | 0.0000000        | 0.00   | 2.91606          | 0.68 | 0.0003504       | 19.13  | 0.0000000       | 0.00 | 3.15797         | 0.10 | 0.0005249        | 9.65 | 0.0000000        | 0.00   | 261.486         | 0.04 | 0.0018736        | 1.14 |
| 20F11378           | 17.0 % | ✓ 0.0007325     | 48.75  | 0.0000000       | 0.00 | 0.0005481        | 1.01 | 0.0000000        | 0.00   | 2.02788          | 1.00 | 0.0001381       | 48.75  | 0.0000000       | 0.00 | 2.53465         | 0.10 | 0.0003650        | 9.68 | 0.0000000        | 0.00   | 209.874         | 0.04 | 0.0013029        | 1.36 |
| 20F11380           | 17.0 % | ✓ 0.0010002     | 34.40  | 0.0000000       | 0.00 | 0.0003319        | 1.56 | 0.0000000        | 0.00   | 1.22778          | 1.55 | 0.0001885       | 34.40  | 0.0000000       | 0.00 | 1.62190         | 0.10 | 0.0002210        | 9.75 | 0.0000000        | 0.00   | 134.296         | 0.04 | 0.0007888        | 1.80 |
| 20F11381           | 17.0 % | ✓ 0.0041648     | 8.10   | 0.0000000       | 0.00 | 0.0005746        | 0.93 | 0.0000000        | 0.00   | 2.12577          | 0.91 | 0.0007851       | 8.10   | 0.0000000       | 0.00 | 2.36971         | 0.10 | 0.0003826        | 9.67 | 0.0000000        | 0.00   | 196.217         | 0.04 | 0.0013658        | 1.30 |
| Σ                  |        | 0.7487320       | 0.33   | 0.0000000       | 0.00 | 0.0872568        | 0.12 | 0.0000003        | 267.87 | 322.81452        | 0.09 | 0.1411360       | 0.34   | 0.0000000       | 0.00 | 134.83832       | 0.02 | 0.0581066        | 4.45 | 0.0048461        | 267.88 | 11164.885       | 0.01 | 0.2074083        | 0.43 |
| Σ                  |        |                 |        |                 |      |                  |      | 0.8359891        | 0.30   | 322.81452        | 0.09 |                 |        |                 |      |                 |      |                  |      | 135.04241        | 0.02   |                 |      | 11165.093        | 0.01 |

| 40Ar(r)<br>[fA] | %1σ  | 40Ar(a)<br>[fA] | %1σ    | 40Ar(c)<br>[fA] | %1σ  | 40Ar(k)<br>[fA] | %1σ  |
|-----------------|------|-----------------|--------|-----------------|------|-----------------|------|
| 215.449         | 0.08 | 16.96247        | 1.00   | 0.0000000       | 0.00 | 0.0367065       | 9.65 |
| 2715.940        | 0.01 | 8.33382         | 1.95   | 0.0000000       | 0.00 | 0.4639032       | 9.65 |
| 1715.946        | 0.01 | 0.04777         | 246.36 | 0.0000000       | 0.00 | 0.2933804       | 9.65 |
| 1800.842        | 0.01 | 1.91536         | 6.57   | 0.0000000       | 0.00 | 0.3077426       | 9.65 |
| 1374.272        | 0.01 | 0.70445         | 17.00  | 0.0000000       | 0.00 | 0.2348972       | 9.65 |
| 1598.739        | 0.01 | 3.21176         | 3.77   | 0.0000000       | 0.00 | 0.2735106       | 9.65 |
| 1894.654        | 0.01 | 5.23152         | 2.65   | 0.0000000       | 0.00 | 0.3238123       | 9.65 |
| 116.011         | 0.13 | 7.05513         | 2.07   | 0.0000000       | 0.00 | 0.0194343       | 9.65 |
| 2471.385        | 0.01 | 40.69648        | 0.53   | 0.0000000       | 0.00 | 0.4223125       | 9.65 |
| 1769.590        | 0.01 | 1.22604         | 10.21  | 0.0000000       | 0.00 | 0.3023332       | 9.65 |
| 1383.525        | 0.02 | 79.88962        | 0.36   | 0.0000000       | 0.00 | 0.2365807       | 9.65 |
| 1645.822        | 0.01 | 2.47402         | 5.00   | 0.0000000       | 0.00 | 0.2809904       | 9.65 |
| 1887.411        | 0.01 | 0.28891         | 39.63  | 0.0000000       | 0.00 | 0.3226634       | 9.65 |
| 1563.596        | 0.01 | 0.35442         | 32.13  | 0.0000000       | 0.00 | 0.2670838       | 9.65 |
| 898.550         | 0.01 | 5.21100         | 2.20   | 0.0000000       | 0.00 | 0.1537353       | 9.65 |
| 1148.709        | 0.01 | 1.77425         | 6.14   | 0.0000000       | 0.00 | 0.1963710       | 9.65 |
| 1238.007        | 0.01 | 2.33503         | 4.58   | 0.0000000       | 0.00 | 0.2116806       | 9.65 |
| 1605.007        | 0.01 | 5.40582         | 2.28   | 0.0000000       | 0.00 | 0.2744042       | 9.65 |
| 1334.996        | 0.01 | 3.40767         | 3.72   | 0.0000000       | 0.00 | 0.2283251       | 9.65 |
| 1776.946        | 0.01 | 18.96553        | 0.92   | 0.0000000       | 0.00 | 0.3035959       | 9.65 |
| 1613.005        | 0.01 | 3.97429         | 3.09   | 0.0000000       | 0.00 | 0.2757857       | 9.65 |
| 1029.648        | 0.01 | 0.77270         | 13.03  | 0.0000000       | 0.00 | 0.1759715       | 9.65 |
| 1088.315        | 0.01 | 2.11516         | 5.87   | 0.0000000       | 0.00 | 0.1859843       | 9.65 |
| 1461.670        | 0.01 | 3.52206         | 3.48   | 0.0000000       | 0.00 | 0.2499992       | 9.65 |
| 510.283         | 0.03 | 4.60479         | 2.68   | 0.0000000       | 0.00 | 0.0872043       | 9.65 |
| 946.486         | 0.01 | 1.32346         | 8.62   | 0.0000000       | 0.00 | 0.1619396       | 9.65 |
| 927.738         | 0.01 | 0.55498         | 19.13  | 0.0000000       | 0.00 | 0.1587223       | 9.65 |
| 745.127         | 0.02 | 0.21871         | 48.75  | 0.0000000       | 0.00 | 0.1273937       | 9.65 |
| 476.248         | 0.02 | 0.29861         | 34.40  | 0.0000000       | 0.00 | 0.0815179       | 9.65 |
| 696.523         | 0.02 | 1.24344         | 8.10   | 0.0000000       | 0.00 | 0.1191035       | 9.65 |
| 39650.440       | 0.00 | 223.54141       | 0.34   | 0.0000000       | 0.00 | 6.7770853       | 1.93 |
|                 |      |                 |        |                 |      | 39880.759       | 0.00 |

| Additional Parameters |        |   | 40Ar/39Ar | 1σ       | 37Ar/39Ar | 1σ       | 36Ar/39Ar | 1σ       | Time (days) | 37Ar (decay) | 39Ar (decay) | 40Ar (moles) |
|-----------------------|--------|---|-----------|----------|-----------|----------|-----------|----------|-------------|--------------|--------------|--------------|
| 20F11338              | 17.0 % |   | 3.839051  | 0.001871 | 1.962243  | 0.003619 | 0.001469  | 0.000009 | 42.333      | 2.313210     | 1.00029963   | 8.229E-12    |
| 20F11339              | 17.0 % | ✓ | 3.565194  | 0.001542 | 0.010317  | 0.000032 | 0.000039  | 0.000001 | 42.340      | 2.313495     | 1.00029967   | 9.646E-11    |
| 20F11341              | 17.0 % | ✓ | 3.550951  | 0.001544 | 0.010033  | 0.000045 | 0.000003  | 0.000001 | 42.351      | 2.314035     | 1.00029976   | 6.076E-11    |
| 20F11342              | 17.0 % | ✓ | 3.556385  | 0.001547 | 0.013725  | 0.000046 | 0.000016  | 0.000001 | 42.358      | 2.314320     | 1.00029980   | 6.383E-11    |
| 20F11344              | 17.0 % | ✓ | 3.553677  | 0.001551 | 0.008752  | 0.000050 | 0.000008  | 0.000001 | 42.369      | 2.314860     | 1.00029989   | 4.868E-11    |
| 20F11345              | 17.0 % | ✓ | 3.555779  | 0.001548 | 0.010606  | 0.000045 | 0.000027  | 0.000001 | 42.375      | 2.315114     | 1.00029992   | 5.672E-11    |
| 20F11347              | 17.0 % | ✓ | 3.561997  | 0.001551 | 0.012010  | 0.000044 | 0.000036  | 0.000001 | 42.387      | 2.315686     | 1.00030001   | 6.727E-11    |
| 20F11348              | 17.0 % |   | 3.837721  | 0.002289 | 2.704807  | 0.005058 | 0.001468  | 0.000015 | 42.393      | 2.315940     | 1.00030005   | 4.357E-12    |
| 20F11350              | 17.0 % | ✓ | 3.611256  | 0.001563 | 0.011219  | 0.000034 | 0.000199  | 0.000001 | 42.405      | 2.316480     | 1.00030014   | 8.894E-11    |
| 20F11351              | 17.0 % | ✓ | 3.555879  | 0.001547 | 0.012483  | 0.000044 | 0.000012  | 0.000001 | 42.411      | 2.316766     | 1.00030018   | 6.270E-11    |
| 20F11353              | 17.0 % | ✓ | 3.755297  | 0.001638 | 0.009641  | 0.000050 | 0.000689  | 0.000002 | 42.423      | 2.317306     | 1.00030026   | 5.181E-11    |
| 20F11354              | 17.0 % | ✓ | 3.561260  | 0.001549 | 0.010251  | 0.000042 | 0.000021  | 0.000001 | 42.429      | 2.317592     | 1.00030031   | 5.836E-11    |
| 20F11356              | 17.0 % | ✓ | 3.550670  | 0.001544 | 0.010819  | 0.000038 | 0.000001  | 0.000001 | 42.441      | 2.318133     | 1.00030039   | 6.682E-11    |
| 20F11357              | 17.0 % | ✓ | 3.554966  | 0.001551 | 0.010556  | 0.000045 | 0.000006  | 0.000001 | 42.447      | 2.318387     | 1.00030043   | 5.537E-11    |
| 20F11359              | 17.0 % | ✓ | 3.568942  | 0.001571 | 0.012149  | 0.000076 | 0.000072  | 0.000002 | 42.459      | 2.318960     | 1.00030052   | 3.200E-11    |
| 20F11360              | 17.0 % | ✓ | 3.556831  | 0.001553 | 0.008876  | 0.000061 | 0.000021  | 0.000001 | 42.465      | 2.319214     | 1.00030056   | 4.073E-11    |
| 20F11362              | 17.0 % | ✓ | 3.557297  | 0.001554 | 0.010468  | 0.000057 | 0.000025  | 0.000001 | 42.476      | 2.319755     | 1.00030064   | 4.392E-11    |
| 20F11363              | 17.0 % | ✓ | 3.562923  | 0.001550 | 0.009580  | 0.000047 | 0.000043  | 0.000001 | 42.483      | 2.320041     | 1.00030068   | 5.702E-11    |
| 20F11365              | 17.0 % | ✓ | 3.558713  | 0.001554 | 0.010816  | 0.000056 | 0.000033  | 0.000001 | 42.494      | 2.320583     | 1.00030077   | 4.739E-11    |
| 20F11366              | 17.0 % | ✓ | 3.591269  | 0.001560 | 0.010953  | 0.000043 | 0.000130  | 0.000001 | 42.501      | 2.320869     | 1.00030081   | 6.359E-11    |
| 20F11368              | 17.0 % | ✓ | 3.559530  | 0.001552 | 0.009359  | 0.000050 | 0.000032  | 0.000001 | 42.512      | 2.321410     | 1.00030090   | 5.725E-11    |
| 20F11369              | 17.0 % | ✓ | 3.554944  | 0.001562 | 0.008972  | 0.000074 | 0.000011  | 0.000001 | 42.519      | 2.321697     | 1.00030094   | 3.648E-11    |
| 20F11371              | 17.0 % | ✓ | 3.559435  | 0.001554 | 0.010899  | 0.000068 | 0.000026  | 0.000001 | 42.531      | 2.322238     | 1.00030102   | 3.861E-11    |
| 20F11372              | 17.0 % | ✓ | 3.558083  | 0.001553 | 0.009198  | 0.000051 | 0.000031  | 0.000001 | 42.536      | 2.322493     | 1.00030106   | 5.188E-11    |
| 20F11374              | 17.0 % | ✓ | 3.584550  | 0.001603 | 0.009058  | 0.000130 | 0.000110  | 0.000003 | 42.549      | 2.323067     | 1.00030115   | 1.823E-11    |
| 20F11375              | 17.0 % | ✓ | 3.553265  | 0.001566 | 0.011284  | 0.000074 | 0.000020  | 0.000001 | 42.554      | 2.323322     | 1.00030119   | 3.356E-11    |
| 20F11377              | 17.0 % | ✓ | 3.550644  | 0.001561 | 0.011152  | 0.000076 | 0.000010  | 0.000001 | 42.566      | 2.323863     | 1.00030127   | 3.287E-11    |
| 20F11378              | 17.0 % | ✓ | 3.551975  | 0.001571 | 0.009662  | 0.000096 | 0.000006  | 0.000002 | 42.572      | 2.324150     | 1.00030132   | 2.639E-11    |
| 20F11380              | 17.0 % | ✓ | 3.549055  | 0.001605 | 0.009142  | 0.000142 | 0.000010  | 0.000003 | 42.584      | 2.324692     | 1.00030140   | 1.687E-11    |
| 20F11381              | 17.0 % | ✓ | 3.556687  | 0.001575 | 0.010834  | 0.000099 | 0.000024  | 0.000002 | 42.590      | 2.324979     | 1.00030144   | 2.471E-11    |

| Procedure<br>Blanks |        | 36Ar ± 1σ (SE)<br>[fA] | 37Ar ± 1σ (SE)<br>[fA] | 38Ar ± 1σ (SE)<br>[fA] | 39Ar ± 1σ (SE)<br>[fA] | 40Ar ± 1σ (SE)<br>[fA] |
|---------------------|--------|------------------------|------------------------|------------------------|------------------------|------------------------|
| 20F11338            | 17.0 % | 0.0064383 ±0.0001892   | 0.0331547 ±0.0058948   | 0.0265788 ±0.0066233   | 0.0082065 ±0.0059324   | 1.4123157 ±0.0155657   |
| 20F11339            | 17.0 % | 0.0064383 ±0.0001892   | 0.0331547 ±0.0058948   | 0.0265788 ±0.0066233   | 0.0082065 ±0.0059324   | 1.4123157 ±0.0155657   |
| 20F11341            | 17.0 % | 0.0063048 ±0.0002151   | 0.0251713 ±0.0054895   | 0.0256647 ±0.0068081   | 0.0166453 ±0.0068936   | 1.6225761 ±0.0156470   |
| 20F11342            | 17.0 % | 0.0063048 ±0.0002151   | 0.0251713 ±0.0054895   | 0.0256647 ±0.0068081   | 0.0166453 ±0.0068936   | 1.6225761 ±0.0156470   |
| 20F11344            | 17.0 % | 0.0058303 ±0.0001946   | 0.0184897 ±0.0055149   | 0.0263775 ±0.0065532   | 0.0256362 ±0.0066824   | 1.2961516 ±0.0153474   |
| 20F11345            | 17.0 % | 0.0058303 ±0.0001946   | 0.0184897 ±0.0055149   | 0.0263775 ±0.0065532   | 0.0256362 ±0.0066824   | 1.2961516 ±0.0153474   |
| 20F11347            | 17.0 % | 0.0069721 ±0.0001660   | 0.0234230 ±0.0056069   | 0.0139791 ±0.0066561   | 0.0098897 ±0.0060074   | 1.7577421 ±0.0153499   |
| 20F11348            | 17.0 % | 0.0069721 ±0.0001660   | 0.0234230 ±0.0056069   | 0.0139791 ±0.0066561   | 0.0098897 ±0.0060074   | 1.7577421 ±0.0153499   |
| 20F11350            | 17.0 % | 0.0059624 ±0.0002059   | 0.0261377 ±0.0054471   | 0.0240068 ±0.0064889   | 0.0160527 ±0.0060499   | 1.4157352 ±0.0161936   |
| 20F11351            | 17.0 % | 0.0059624 ±0.0002059   | 0.0261377 ±0.0054471   | 0.0240068 ±0.0064889   | 0.0160527 ±0.0060499   | 1.4157352 ±0.0161936   |
| 20F11353            | 17.0 % | 0.0056411 ±0.0001817   | 0.0273798 ±0.0049515   | 0.0181069 ±0.0062728   | 0.0065697 ±0.0056735   | 1.4022974 ±0.0157306   |
| 20F11354            | 17.0 % | 0.0056411 ±0.0001817   | 0.0273798 ±0.0049515   | 0.0181069 ±0.0062728   | 0.0065697 ±0.0056735   | 1.4022974 ±0.0157306   |
| 20F11356            | 17.0 % | 0.0065810 ±0.0002083   | 0.0294938 ±0.0051087   | 0.0259434 ±0.0063858   | 0.0121206 ±0.0065087   | 1.6220587 ±0.0161641   |
| 20F11357            | 17.0 % | 0.0065810 ±0.0002083   | 0.0294938 ±0.0051087   | 0.0259434 ±0.0063858   | 0.0121206 ±0.0065087   | 1.6220587 ±0.0161641   |
| 20F11359            | 17.0 % | 0.0050894 ±0.0001831   | 0.0269596 ±0.0056186   | 0.0188827 ±0.0064277   | 0.0055805 ±0.0064888   | 1.3295655 ±0.0145840   |
| 20F11360            | 17.0 % | 0.0050894 ±0.0001831   | 0.0269596 ±0.0056186   | 0.0188827 ±0.0064277   | 0.0055805 ±0.0064888   | 1.3295655 ±0.0145840   |
| 20F11362            | 17.0 % | 0.0054899 ±0.0001840   | 0.0331284 ±0.0053710   | 0.0181156 ±0.0063821   | 0.0047226 ±0.0059850   | 1.4023421 ±0.0149015   |
| 20F11363            | 17.0 % | 0.0054899 ±0.0001840   | 0.0331284 ±0.0053710   | 0.0181156 ±0.0063821   | 0.0047226 ±0.0059850   | 1.4023421 ±0.0149015   |
| 20F11365            | 17.0 % | 0.0056109 ±0.0001991   | 0.0217536 ±0.0056416   | 0.0250492 ±0.0064577   | 0.0232887 ±0.0060565   | 1.3635741 ±0.0169926   |
| 20F11366            | 17.0 % | 0.0056109 ±0.0001991   | 0.0217536 ±0.0056416   | 0.0250492 ±0.0064577   | 0.0232887 ±0.0060565   | 1.3635741 ±0.0169926   |
| 20F11368            | 17.0 % | 0.0053968 ±0.0001903   | 0.0197455 ±0.0066206   | 0.0156887 ±0.0068733   | 0.0062701 ±0.0060372   | 1.3988291 ±0.0149789   |
| 20F11369            | 17.0 % | 0.0053968 ±0.0001903   | 0.0197455 ±0.0066206   | 0.0156887 ±0.0068733   | 0.0062701 ±0.0060372   | 1.3988291 ±0.0149789   |
| 20F11371            | 17.0 % | 0.0058129 ±0.0001988   | 0.0276097 ±0.0061286   | 0.0374986 ±0.0059836   | 0.0083452 ±0.0061609   | 1.4124535 ±0.0160906   |
| 20F11372            | 17.0 % | 0.0058129 ±0.0001988   | 0.0276097 ±0.0061286   | 0.0374986 ±0.0059836   | 0.0083452 ±0.0061609   | 1.4124535 ±0.0160906   |
| 20F11374            | 17.0 % | 0.0059064 ±0.0001946   | 0.0261588 ±0.0058497   | 0.0190510 ±0.0064712   | 0.0088035 ±0.0061130   | 1.3422703 ±0.0152556   |
| 20F11375            | 17.0 % | 0.0059064 ±0.0001946   | 0.0261588 ±0.0058497   | 0.0190510 ±0.0064712   | 0.0088035 ±0.0061130   | 1.3422703 ±0.0152556   |
| 20F11377            | 17.0 % | 0.0063002 ±0.0001895   | 0.0314772 ±0.0056489   | 0.0199642 ±0.0062994   | 0.0163678 ±0.0063427   | 1.4723398 ±0.0157755   |
| 20F11378            | 17.0 % | 0.0063002 ±0.0001895   | 0.0314772 ±0.0056489   | 0.0199642 ±0.0062994   | 0.0163678 ±0.0063427   | 1.4723398 ±0.0157755   |
| 20F11380            | 17.0 % | 0.0059064 ±0.0001946   | 0.0261588 ±0.0058497   | 0.0190510 ±0.0064712   | 0.0088035 ±0.0061130   | 1.3422703 ±0.0152556   |
| 20F11381            | 17.0 % | 0.0059064 ±0.0001946   | 0.0261588 ±0.0058497   | 0.0190510 ±0.0064712   | 0.0088035 ±0.0061130   | 1.3422703 ±0.0152556   |



| Intercept Values |        | 36Ar ± 1σ (SE)<br>[fA] | r2     | Regression<br>(type,n) | 37Ar ± 1σ (SE)<br>[fA] | r2     | Regression<br>(type,n) | 38Ar ± 1σ (SE)<br>[fA] | r2     | Regression<br>(type,n) | 39Ar ± 1σ (SE)<br>[fA] | r2     | Regression<br>(type,n) | 40Ar ± 1σ (SE)<br>[fA] |
|------------------|--------|------------------------|--------|------------------------|------------------------|--------|------------------------|------------------------|--------|------------------------|------------------------|--------|------------------------|------------------------|
| 20F11338         | 17.0 % | 0.0889512 ±0.0004649   | 0.0297 | EXP 150 of 150         | 51.3205916 ±0.0129324  | 0.9994 | EXP 150 of 150         | 0.7262556 ±0.0068333   | 0.5655 | EXP 150 of 150         | 60.53523 ±0.01037      | 0.9997 | EXP 146 of 150         | 233.86035 ±0.02251     |
| 20F11339         | 17.0 % | 0.0343153 ±0.0004651   | 0.9853 | EXP 150 of 150         | 3.3744346 ±0.0060766   | 0.9705 | EXP 150 of 150         | 9.1213464 ±0.0081472   | 0.9926 | EXP 150 of 150         | 764.00041 ±0.03185     | 1.0000 | EXP 146 of 150         | 2726.15026 ±0.06843    |
| 20F11341         | 17.0 % | 0.0076694 ±0.0002957   | 0.9903 | EXP 149 of 150         | 2.0700216 ±0.0066021   | 0.9151 | EXP 150 of 150         | 5.7683145 ±0.0066044   | 0.9880 | EXP 150 of 150         | 483.14503 ±0.02504     | 1.0000 | EXP 150 of 150         | 1717.90935 ±0.06340    |
| 20F11342         | 17.0 % | 0.0140025 ±0.0003262   | 0.9891 | EXP 149 of 150         | 2.9811380 ±0.0064821   | 0.9594 | EXP 150 of 150         | 6.0599976 ±0.0067747   | 0.9883 | EXP 150 of 150         | 506.79908 ±0.02889     | 1.0000 | EXP 150 of 150         | 1804.68810 ±0.05629    |
| 20F11344         | 17.0 % | 0.0088690 ±0.0003171   | 0.9844 | EXP 150 of 150         | 1.4443451 ±0.0057137   | 0.8598 | EXP 150 of 150         | 4.6070645 ±0.0075306   | 0.9752 | EXP 150 of 150         | 386.82100 ±0.02375     | 1.0000 | EXP 150 of 150         | 1376.50789 ±0.05700    |
| 20F11345         | 17.0 % | 0.0170103 ±0.0003208   | 0.9872 | EXP 149 of 150         | 2.0455045 ±0.0056951   | 0.9341 | EXP 149 of 150         | 5.3911080 ±0.0075644   | 0.9816 | EXP 150 of 150         | 450.41307 ±0.02636     | 1.0000 | EXP 150 of 150         | 1603.52018 ±0.05504    |
| 20F11347         | 17.0 % | 0.0248373 ±0.0003966   | 0.9829 | EXP 150 of 150         | 2.7429585 ±0.0066889   | 0.9479 | EXP 150 of 150         | 6.3776569 ±0.0068258   | 0.9892 | EXP 150 of 150         | 533.26995 ±0.03208     | 1.0000 | EXP 150 of 150         | 1901.96752 ±0.06218    |
| 20F11348         | 17.0 % | 0.0506547 ±0.0004105   | 0.7103 | EXP 150 of 150         | 37.4286963 ±0.0094394  | 0.9994 | EXP 150 of 150         | 0.3644151 ±0.0067622   | 0.2675 | EXP 150 of 150         | 32.05150 ±0.00940      | 0.9991 | EXP 150 of 150         | 124.84371 ±0.02288     |
| 20F11350         | 17.0 % | 0.1343951 ±0.0005779   | 0.9497 | EXP 148 of 150         | 3.3429107 ±0.0060165   | 0.9706 | EXP 149 of 150         | 8.3397030 ±0.0068328   | 0.9938 | EXP 150 of 150         | 695.51348 ±0.03141     | 1.0000 | EXP 148 of 150         | 2513.91911 ±0.06437    |
| 20F11351         | 17.0 % | 0.0113320 ±0.0003300   | 0.9893 | EXP 150 of 150         | 2.6572224 ±0.0061445   | 0.9522 | EXP 149 of 150         | 5.9369184 ±0.0076671   | 0.9842 | EXP 150 of 150         | 497.92258 ±0.02756     | 1.0000 | EXP 150 of 150         | 1772.53451 ±0.06448    |
| 20F11353         | 17.0 % | 0.2548615 ±0.0007297   | 0.0103 | EXP 149 of 150         | 1.5938933 ±0.0062269   | 0.8827 | EXP 150 of 150         | 4.7080381 ±0.0064136   | 0.9824 | EXP 150 of 150         | 389.61267 ±0.02412     | 1.0000 | EXP 150 of 150         | 1465.05347 ±0.05698    |
| 20F11354         | 17.0 % | 0.0145198 ±0.0003386   | 0.9870 | EXP 150 of 150         | 2.0198039 ±0.0055473   | 0.9341 | EXP 150 of 150         | 5.5283367 ±0.0070741   | 0.9848 | EXP 150 of 150         | 462.75014 ±0.02567     | 1.0000 | EXP 150 of 150         | 1649.97969 ±0.05813    |
| 20F11356         | 17.0 % | 0.0071256 ±0.0002884   | 0.9923 | EXP 149 of 150         | 2.4511276 ±0.0054401   | 0.9575 | EXP 150 of 150         | 6.3274791 ±0.0071307   | 0.9880 | EXP 150 of 150         | 531.37511 ±0.02934     | 1.0000 | EXP 150 of 150         | 1889.06717 ±0.06342    |
| 20F11357         | 17.0 % | 0.0088473 ±0.0002861   | 0.9909 | EXP 148 of 150         | 1.9735743 ±0.0058284   | 0.9241 | EXP 149 of 150         | 5.2606042 ±0.0073761   | 0.9817 | EXP 149 of 150         | 439.84215 ±0.02828     | 1.0000 | EXP 150 of 150         | 1565.83993 ±0.05847    |
| 20F11359         | 17.0 % | 0.0220556 ±0.0003042   | 0.9726 | EXP 149 of 150         | 1.2997221 ±0.0055886   | 0.8567 | EXP 148 of 150         | 3.0188908 ±0.0066707   | 0.9571 | EXP 149 of 150         | 253.18893 ±0.01924     | 0.9999 | EXP 149 of 150         | 905.24461 ±0.04373     |
| 20F11360         | 17.0 % | 0.0113235 ±0.0002844   | 0.9843 | EXP 150 of 150         | 1.2109671 ±0.0059383   | 0.8159 | EXP 150 of 150         | 3.8331706 ±0.0068982   | 0.9690 | EXP 149 of 150         | 323.40416 ±0.02026     | 1.0000 | EXP 146 of 150         | 1152.00901 ±0.04681    |
| 20F11362         | 17.0 % | 0.0136622 ±0.0002762   | 0.9864 | EXP 148 of 150         | 1.5403055 ±0.0060647   | 0.8774 | EXP 149 of 150         | 4.1550999 ±0.0074301   | 0.9713 | EXP 150 of 150         | 348.60722 ±0.02220     | 1.0000 | EXP 149 of 150         | 1241.95576 ±0.05174    |
| 20F11363         | 17.0 % | 0.0233761 ±0.0003332   | 0.9852 | EXP 149 of 150         | 1.8331940 ±0.0065963   | 0.8932 | EXP 150 of 150         | 5.3939187 ±0.0067205   | 0.9850 | EXP 149 of 150         | 451.90503 ±0.02480     | 1.0000 | EXP 148 of 150         | 1612.08967 ±0.05941    |
| 20F11365         | 17.0 % | 0.0172215 ±0.0003395   | 0.9810 | EXP 150 of 150         | 1.7311674 ±0.0064003   | 0.8969 | EXP 150 of 150         | 4.4842749 ±0.0072992   | 0.9757 | EXP 150 of 150         | 376.00013 ±0.02481     | 1.0000 | EXP 150 of 150         | 1339.99508 ±0.05040    |
| 20F11366         | 17.0 % | 0.0659251 ±0.0004893   | 0.9669 | EXP 150 of 150         | 2.3382195 ±0.0060581   | 0.9407 | EXP 148 of 150         | 5.9764750 ±0.0071566   | 0.9866 | EXP 150 of 150         | 499.96195 ±0.02530     | 1.0000 | EXP 150 of 150         | 1797.57846 ±0.06215    |
| 20F11368         | 17.0 % | 0.0188144 ±0.0003291   | 0.9865 | EXP 150 of 150         | 1.8117297 ±0.0065356   | 0.8961 | EXP 150 of 150         | 5.4113876 ±0.0068299   | 0.9850 | EXP 149 of 150         | 454.17848 ±0.02840     | 1.0000 | EXP 150 of 150         | 1618.65357 ±0.05865    |
| 20F11369         | 17.0 % | 0.0084505 ±0.0002483   | 0.9880 | EXP 150 of 150         | 1.1004084 ±0.0061427   | 0.7971 | EXP 149 of 150         | 3.4395502 ±0.0064449   | 0.9662 | EXP 149 of 150         | 289.79675 ±0.02226     | 0.9999 | EXP 150 of 150         | 1031.99570 ±0.04375    |
| 20F11371         | 17.0 % | 0.0132242 ±0.0003302   | 0.9779 | EXP 150 of 150         | 1.4102599 ±0.0060331   | 0.8615 | EXP 150 of 150         | 3.6692818 ±0.0062807   | 0.9730 | EXP 150 of 150         | 306.28490 ±0.01901     | 1.0000 | EXP 149 of 150         | 1092.02818 ±0.04374    |
| 20F11372         | 17.0 % | 0.0177087 ±0.0003239   | 0.9858 | EXP 150 of 150         | 1.6031915 ±0.0059874   | 0.8797 | EXP 150 of 150         | 4.9061440 ±0.0075044   | 0.9781 | EXP 150 of 150         | 411.70906 ±0.02636     | 1.0000 | EXP 150 of 150         | 1466.85406 ±0.05406    |
| 20F11374         | 17.0 % | 0.0205433 ±0.0003293   | 0.9442 | EXP 150 of 150         | 0.5339142 ±0.0053947   | 0.5716 | EXP 150 of 150         | 1.7049501 ±0.0069523   | 0.8599 | EXP 149 of 150         | 143.60570 ±0.01369     | 0.9999 | EXP 148 of 150         | 516.31739 ±0.03100     |
| 20F11375         | 17.0 % | 0.0107744 ±0.0002964   | 0.9794 | EXP 150 of 150         | 1.2693521 ±0.0056336   | 0.8492 | EXP 150 of 150         | 3.1864969 ±0.0073475   | 0.9534 | EXP 150 of 150         | 266.68581 ±0.02209     | 0.9999 | EXP 150 of 150         | 949.31339 ±0.04321     |
| 20F11377         | 17.0 % | 0.0087563 ±0.0002699   | 0.9823 | EXP 150 of 150         | 1.2231597 ±0.0060072   | 0.8265 | EXP 150 of 150         | 3.1013046 ±0.0061493   | 0.9657 | EXP 146 of 150         | 261.37961 ±0.01900     | 1.0000 | EXP 150 of 150         | 929.92418 ±0.04699     |
| 20F11378         | 17.0 % | 0.0074885 ±0.0002718   | 0.9773 | EXP 149 of 150         | 0.8409134 ±0.0064406   | 0.6429 | EXP 150 of 150         | 2.4871164 ±0.0070948   | 0.9268 | EXP 150 of 150         | 209.78506 ±0.01772     | 0.9999 | EXP 150 of 150         | 746.94502 ±0.03779     |
| 20F11380         | 17.0 % | 0.0071423 ±0.0002530   | 0.9678 | EXP 150 of 150         | 0.5019065 ±0.0056700   | 0.5129 | EXP 147 of 150         | 1.5854816 ±0.0064298   | 0.8588 | EXP 150 of 150         | 134.24093 ±0.01491     | 0.9999 | EXP 149 of 150         | 477.97026 ±0.03189     |
| 20F11381         | 17.0 % | 0.0103039 ±0.0002451   | 0.9783 | EXP 148 of 150         | 0.8880159 ±0.0057143   | 0.7635 | EXP 149 of 150         | 2.3233787 ±0.0072826   | 0.9165 | EXP 150 of 150         | 196.13983 ±0.01627     | 0.9999 | EXP 150 of 150         | 699.22799 ±0.03853     |

| r2     | Regression<br>(type,n) |            |
|--------|------------------------|------------|
| 0.9999 | EXP                    | 150 of 150 |
| 1.0000 | EXP                    | 147 of 150 |
| 1.0000 | EXP                    | 150 of 150 |
| 1.0000 | EXP                    | 150 of 150 |
| 1.0000 | EXP                    | 150 of 150 |
| 1.0000 | EXP                    | 150 of 150 |
| 1.0000 | EXP                    | 149 of 150 |
| 0.9985 | EXP                    | 150 of 150 |
| 1.0000 | EXP                    | 150 of 150 |
| 1.0000 | EXP                    | 150 of 150 |
| 1.0000 | EXP                    | 149 of 150 |
| 1.0000 | EXP                    | 150 of 150 |
| 1.0000 | EXP                    | 150 of 150 |
| 1.0000 | EXP                    | 149 of 150 |
| 1.0000 | EXP                    | 149 of 150 |
| 1.0000 | EXP                    | 150 of 150 |
| 1.0000 | EXP                    | 150 of 150 |
| 1.0000 | EXP                    | 150 of 150 |
| 1.0000 | EXP                    | 149 of 150 |
| 1.0000 | EXP                    | 149 of 150 |
| 1.0000 | EXP                    | 149 of 150 |
| 1.0000 | EXP                    | 147 of 150 |
| 1.0000 | EXP                    | 148 of 150 |
| 1.0000 | EXP                    | 150 of 150 |
| 1.0000 | EXP                    | 149 of 150 |
| 1.0000 | EXP                    | 149 of 150 |
| 1.0000 | EXP                    | 150 of 150 |
| 1.0000 | EXP                    | 150 of 150 |
| 0.9999 | EXP                    | 149 of 150 |
| 1.0000 | EXP                    | 149 of 150 |

| Project Info |        | Analyst     | Irradiation | X-pos | Y-pos | Z/H-pos | Project                | Experiment | Nmb |
|--------------|--------|-------------|-------------|-------|-------|---------|------------------------|------------|-----|
| 20F11338     | 17.0 % | Dan Miggins | 20-OSU-01   | 0.00  | 0.00  | 40.33   | Oregon\Swenton (18-58) | 20F11333   | 01  |
| 20F11339     | 17.0 % | Dan Miggins | 20-OSU-01   | 0.00  | 0.00  | 40.33   | Oregon\Swenton (18-58) | 20F11333   | 01  |
| 20F11341     | 17.0 % | Dan Miggins | 20-OSU-01   | 0.00  | 0.00  | 40.33   | Oregon\Swenton (18-58) | 20F11333   | 01  |
| 20F11342     | 17.0 % | Dan Miggins | 20-OSU-01   | 0.00  | 0.00  | 40.33   | Oregon\Swenton (18-58) | 20F11333   | 01  |
| 20F11344     | 17.0 % | Dan Miggins | 20-OSU-01   | 0.00  | 0.00  | 40.33   | Oregon\Swenton (18-58) | 20F11333   | 01  |
| 20F11345     | 17.0 % | Dan Miggins | 20-OSU-01   | 0.00  | 0.00  | 40.33   | Oregon\Swenton (18-58) | 20F11333   | 01  |
| 20F11347     | 17.0 % | Dan Miggins | 20-OSU-01   | 0.00  | 0.00  | 40.33   | Oregon\Swenton (18-58) | 20F11333   | 01  |
| 20F11348     | 17.0 % | Dan Miggins | 20-OSU-01   | 0.00  | 0.00  | 40.33   | Oregon\Swenton (18-58) | 20F11333   | 01  |
| 20F11350     | 17.0 % | Dan Miggins | 20-OSU-01   | 0.00  | 0.00  | 40.33   | Oregon\Swenton (18-58) | 20F11333   | 01  |
| 20F11351     | 17.0 % | Dan Miggins | 20-OSU-01   | 0.00  | 0.00  | 40.33   | Oregon\Swenton (18-58) | 20F11333   | 01  |
| 20F11353     | 17.0 % | Dan Miggins | 20-OSU-01   | 0.00  | 0.00  | 40.33   | Oregon\Swenton (18-58) | 20F11333   | 01  |
| 20F11354     | 17.0 % | Dan Miggins | 20-OSU-01   | 0.00  | 0.00  | 40.33   | Oregon\Swenton (18-58) | 20F11333   | 01  |
| 20F11356     | 17.0 % | Dan Miggins | 20-OSU-01   | 0.00  | 0.00  | 40.33   | Oregon\Swenton (18-58) | 20F11333   | 01  |
| 20F11357     | 17.0 % | Dan Miggins | 20-OSU-01   | 0.00  | 0.00  | 40.33   | Oregon\Swenton (18-58) | 20F11333   | 01  |
| 20F11359     | 17.0 % | Dan Miggins | 20-OSU-01   | 0.00  | 0.00  | 40.33   | Oregon\Swenton (18-58) | 20F11333   | 01  |
| 20F11360     | 17.0 % | Dan Miggins | 20-OSU-01   | 0.00  | 0.00  | 40.33   | Oregon\Swenton (18-58) | 20F11333   | 01  |
| 20F11362     | 17.0 % | Dan Miggins | 20-OSU-01   | 0.00  | 0.00  | 40.33   | Oregon\Swenton (18-58) | 20F11333   | 01  |
| 20F11363     | 17.0 % | Dan Miggins | 20-OSU-01   | 0.00  | 0.00  | 40.33   | Oregon\Swenton (18-58) | 20F11333   | 01  |
| 20F11365     | 17.0 % | Dan Miggins | 20-OSU-01   | 0.00  | 0.00  | 40.33   | Oregon\Swenton (18-58) | 20F11333   | 01  |
| 20F11366     | 17.0 % | Dan Miggins | 20-OSU-01   | 0.00  | 0.00  | 40.33   | Oregon\Swenton (18-58) | 20F11333   | 01  |
| 20F11368     | 17.0 % | Dan Miggins | 20-OSU-01   | 0.00  | 0.00  | 40.33   | Oregon\Swenton (18-58) | 20F11333   | 01  |
| 20F11369     | 17.0 % | Dan Miggins | 20-OSU-01   | 0.00  | 0.00  | 40.33   | Oregon\Swenton (18-58) | 20F11333   | 01  |
| 20F11371     | 17.0 % | Dan Miggins | 20-OSU-01   | 0.00  | 0.00  | 40.33   | Oregon\Swenton (18-58) | 20F11333   | 01  |
| 20F11372     | 17.0 % | Dan Miggins | 20-OSU-01   | 0.00  | 0.00  | 40.33   | Oregon\Swenton (18-58) | 20F11333   | 01  |
| 20F11374     | 17.0 % | Dan Miggins | 20-OSU-01   | 0.00  | 0.00  | 40.33   | Oregon\Swenton (18-58) | 20F11333   | 01  |
| 20F11375     | 17.0 % | Dan Miggins | 20-OSU-01   | 0.00  | 0.00  | 40.33   | Oregon\Swenton (18-58) | 20F11333   | 01  |
| 20F11377     | 17.0 % | Dan Miggins | 20-OSU-01   | 0.00  | 0.00  | 40.33   | Oregon\Swenton (18-58) | 20F11333   | 01  |
| 20F11378     | 17.0 % | Dan Miggins | 20-OSU-01   | 0.00  | 0.00  | 40.33   | Oregon\Swenton (18-58) | 20F11333   | 01  |
| 20F11380     | 17.0 % | Dan Miggins | 20-OSU-01   | 0.00  | 0.00  | 40.33   | Oregon\Swenton (18-58) | 20F11333   | 01  |
| 20F11381     | 17.0 % | Dan Miggins | 20-OSU-01   | 0.00  | 0.00  | 40.33   | Oregon\Swenton (18-58) | 20F11333   | 01  |

| OSU Argon Geochronology Lab<br>CEOAS Oregon State University, Corvallis, USA |        |           |          |            |                  |                  |       |                     |                    |       |            |       |               |       |           |       |              |                        |     |       |      |      |     |        |
|------------------------------------------------------------------------------|--------|-----------|----------|------------|------------------|------------------|-------|---------------------|--------------------|-------|------------|-------|---------------|-------|-----------|-------|--------------|------------------------|-----|-------|------|------|-----|--------|
| Sample Parameters                                                            |        | Sample    | Material | Location   | Standard Name    | Standard (in Ma) | %1σ   | Standard Reference  | Standard 40Ar/39Ar | %1σ   | J          | %1σ   | Air 40Ar/36Ar | %1σ   | MDF (lin) | %1σ   | Volume Ratio | Sensitivity (mol/volt) | Day | Month | Year | Hour | Min | Resist |
| 20F11338                                                                     | 17.0 % | VS17-046b | Sanidine | Iron Point | FCT-NM (1C31-20) | 28.201           | 0.082 | Kuiper et al (2008) | 9.51702            | 0.157 | 0.00163134 | 0.157 | 298.622       | 0.137 | 0.999948  | 0.043 | 1            | 3.54E-14               | 28  | MAY   | 2020 | 22   | 31  | 1      |
| 20F11339                                                                     | 17.0 % | VS17-046b | Sanidine | Iron Point | FCT-NM (1C31-20) | 28.201           | 0.082 | Kuiper et al (2008) | 9.51702            | 0.157 | 0.00163134 | 0.157 | 298.622       | 0.137 | 0.999948  | 0.043 | 1            | 3.54E-14               | 28  | MAY   | 2020 | 22   | 40  | 1      |
| 20F11341                                                                     | 17.0 % | VS17-046b | Sanidine | Iron Point | FCT-NM (1C31-20) | 28.201           | 0.082 | Kuiper et al (2008) | 9.51702            | 0.157 | 0.00163134 | 0.157 | 298.622       | 0.137 | 0.999948  | 0.043 | 1            | 3.54E-14               | 28  | MAY   | 2020 | 22   | 57  | 1      |
| 20F11342                                                                     | 17.0 % | VS17-046b | Sanidine | Iron Point | FCT-NM (1C31-20) | 28.201           | 0.082 | Kuiper et al (2008) | 9.51702            | 0.157 | 0.00163134 | 0.157 | 298.622       | 0.137 | 0.999948  | 0.043 | 1            | 3.54E-14               | 28  | MAY   | 2020 | 23   | 6   | 1      |
| 20F11344                                                                     | 17.0 % | VS17-046b | Sanidine | Iron Point | FCT-NM (1C31-20) | 28.201           | 0.082 | Kuiper et al (2008) | 9.51702            | 0.157 | 0.00163134 | 0.157 | 298.622       | 0.137 | 0.999948  | 0.043 | 1            | 3.54E-14               | 28  | MAY   | 2020 | 23   | 23  | 1      |
| 20F11345                                                                     | 17.0 % | VS17-046b | Sanidine | Iron Point | FCT-NM (1C31-20) | 28.201           | 0.082 | Kuiper et al (2008) | 9.51702            | 0.157 | 0.00163134 | 0.157 | 298.622       | 0.137 | 0.999948  | 0.043 | 1            | 3.54E-14               | 28  | MAY   | 2020 | 23   | 31  | 1      |
| 20F11347                                                                     | 17.0 % | VS17-046b | Sanidine | Iron Point | FCT-NM (1C31-20) | 28.201           | 0.082 | Kuiper et al (2008) | 9.51702            | 0.157 | 0.00163134 | 0.157 | 298.622       | 0.137 | 0.999948  | 0.043 | 1            | 3.54E-14               | 28  | MAY   | 2020 | 23   | 49  | 1      |
| 20F11348                                                                     | 17.0 % | VS17-046b | Sanidine | Iron Point | FCT-NM (1C31-20) | 28.201           | 0.082 | Kuiper et al (2008) | 9.51702            | 0.157 | 0.00163134 | 0.157 | 298.622       | 0.137 | 0.999948  | 0.043 | 1            | 3.54E-14               | 28  | MAY   | 2020 | 23   | 57  | 1      |
| 20F11350                                                                     | 17.0 % | VS17-046b | Sanidine | Iron Point | FCT-NM (1C31-20) | 28.201           | 0.082 | Kuiper et al (2008) | 9.51702            | 0.157 | 0.00163134 | 0.157 | 298.622       | 0.137 | 0.999948  | 0.043 | 1            | 3.54E-14               | 29  | MAY   | 2020 | 0    | 14  | 1      |
| 20F11351                                                                     | 17.0 % | VS17-046b | Sanidine | Iron Point | FCT-NM (1C31-20) | 28.201           | 0.082 | Kuiper et al (2008) | 9.51702            | 0.157 | 0.00163134 | 0.157 | 298.622       | 0.137 | 0.999948  | 0.043 | 1            | 3.54E-14               | 29  | MAY   | 2020 | 0    | 23  | 1      |
| 20F11353                                                                     | 17.0 % | VS17-046b | Sanidine | Iron Point | FCT-NM (1C31-20) | 28.201           | 0.082 | Kuiper et al (2008) | 9.51702            | 0.157 | 0.00163134 | 0.157 | 298.622       | 0.137 | 0.999948  | 0.043 | 1            | 3.54E-14               | 29  | MAY   | 2020 | 0    | 40  | 1      |
| 20F11354                                                                     | 17.0 % | VS17-046b | Sanidine | Iron Point | FCT-NM (1C31-20) | 28.201           | 0.082 | Kuiper et al (2008) | 9.51702            | 0.157 | 0.00163134 | 0.157 | 298.622       | 0.137 | 0.999948  | 0.043 | 1            | 3.54E-14               | 29  | MAY   | 2020 | 0    | 49  | 1      |
| 20F11356                                                                     | 17.0 % | VS17-046b | Sanidine | Iron Point | FCT-NM (1C31-20) | 28.201           | 0.082 | Kuiper et al (2008) | 9.51702            | 0.157 | 0.00163134 | 0.157 | 298.622       | 0.137 | 0.999948  | 0.043 | 1            | 3.54E-14               | 29  | MAY   | 2020 | 1    | 6   | 1      |
| 20F11357                                                                     | 17.0 % | VS17-046b | Sanidine | Iron Point | FCT-NM (1C31-20) | 28.201           | 0.082 | Kuiper et al (2008) | 9.51702            | 0.157 | 0.00163134 | 0.157 | 298.622       | 0.137 | 0.999948  | 0.043 | 1            | 3.54E-14               | 29  | MAY   | 2020 | 1    | 14  | 1      |
| 20F11359                                                                     | 17.0 % | VS17-046b | Sanidine | Iron Point | FCT-NM (1C31-20) | 28.201           | 0.082 | Kuiper et al (2008) | 9.51702            | 0.157 | 0.00163134 | 0.157 | 298.622       | 0.137 | 0.999948  | 0.043 | 1            | 3.54E-14               | 29  | MAY   | 2020 | 1    | 32  | 1      |
| 20F11360                                                                     | 17.0 % | VS17-046b | Sanidine | Iron Point | FCT-NM (1C31-20) | 28.201           | 0.082 | Kuiper et al (2008) | 9.51702            | 0.157 | 0.00163134 | 0.157 | 298.622       | 0.137 | 0.999948  | 0.043 | 1            | 3.54E-14               | 29  | MAY   | 2020 | 1    | 40  | 1      |
| 20F11362                                                                     | 17.0 % | VS17-046b | Sanidine | Iron Point | FCT-NM (1C31-20) | 28.201           | 0.082 | Kuiper et al (2008) | 9.51702            | 0.157 | 0.00163134 | 0.157 | 298.622       | 0.137 | 0.999948  | 0.043 | 1            | 3.54E-14               | 29  | MAY   | 2020 | 1    | 57  | 1      |
| 20F11363                                                                     | 17.0 % | VS17-046b | Sanidine | Iron Point | FCT-NM (1C31-20) | 28.201           | 0.082 | Kuiper et al (2008) | 9.51702            | 0.157 | 0.00163134 | 0.157 | 298.622       | 0.137 | 0.999948  | 0.043 | 1            | 3.54E-14               | 29  | MAY   | 2020 | 2    | 6   | 1      |
| 20F11365                                                                     | 17.0 % | VS17-046b | Sanidine | Iron Point | FCT-NM (1C31-20) | 28.201           | 0.082 | Kuiper et al (2008) | 9.51702            | 0.157 | 0.00163134 | 0.157 | 298.622       | 0.137 | 0.999948  | 0.043 | 1            | 3.54E-14               | 29  | MAY   | 2020 | 2    | 23  | 1      |
| 20F11366                                                                     | 17.0 % | VS17-046b | Sanidine | Iron Point | FCT-NM (1C31-20) | 28.201           | 0.082 | Kuiper et al (2008) | 9.51702            | 0.157 | 0.00163134 | 0.157 | 298.622       | 0.137 | 0.999948  | 0.043 | 1            | 3.54E-14               | 29  | MAY   | 2020 | 2    | 32  | 1      |
| 20F11368                                                                     | 17.0 % | VS17-046b | Sanidine | Iron Point | FCT-NM (1C31-20) | 28.201           | 0.082 | Kuiper et al (2008) | 9.51702            | 0.157 | 0.00163134 | 0.157 | 298.622       | 0.137 | 0.999948  | 0.043 | 1            | 3.54E-14               | 29  | MAY   | 2020 | 2    | 49  | 1      |
| 20F11369                                                                     | 17.0 % | VS17-046b | Sanidine | Iron Point | FCT-NM (1C31-20) | 28.201           | 0.082 | Kuiper et al (2008) | 9.51702            | 0.157 | 0.00163134 | 0.157 | 298.622       | 0.137 | 0.999948  | 0.043 | 1            | 3.54E-14               | 29  | MAY   | 2020 | 2    | 58  | 1      |
| 20F11371                                                                     | 17.0 % | VS17-046b | Sanidine | Iron Point | FCT-NM (1C31-20) | 28.201           | 0.082 | Kuiper et al (2008) | 9.51702            | 0.157 | 0.00163134 | 0.157 | 298.622       | 0.137 | 0.999948  | 0.043 | 1            | 3.54E-14               | 29  | MAY   | 2020 | 3    | 15  | 1      |
| 20F11372                                                                     | 17.0 % | VS17-046b | Sanidine | Iron Point | FCT-NM (1C31-20) | 28.201           | 0.082 | Kuiper et al (2008) | 9.51702            | 0.157 | 0.00163134 | 0.157 | 298.622       | 0.137 | 0.999948  | 0.043 | 1            | 3.54E-14               | 29  | MAY   | 2020 | 3    | 23  | 1      |
| 20F11374                                                                     | 17.0 % | VS17-046b | Sanidine | Iron Point | FCT-NM (1C31-20) | 28.201           | 0.082 | Kuiper et al (2008) | 9.51702            | 0.157 | 0.00163134 | 0.157 | 298.622       | 0.137 | 0.999948  | 0.043 | 1            | 3.54E-14               | 29  | MAY   | 2020 | 3    | 41  | 1      |
| 20F11375                                                                     | 17.0 % | VS17-046b | Sanidine | Iron Point | FCT-NM (1C31-20) | 28.201           | 0.082 | Kuiper et al (2008) | 9.51702            | 0.157 | 0.00163134 | 0.157 | 298.622       | 0.137 | 0.999948  | 0.043 | 1            | 3.54E-14               | 29  | MAY   | 2020 | 3    | 49  | 1      |
| 20F11377                                                                     | 17.0 % | VS17-046b | Sanidine | Iron Point | FCT-NM (1C31-20) | 28.201           | 0.082 | Kuiper et al (2008) | 9.51702            | 0.157 | 0.00163134 | 0.157 | 298.622       | 0.137 | 0.999948  | 0.043 | 1            | 3.54E-14               | 29  | MAY   | 2020 | 4    | 6   | 1      |
| 20F11378                                                                     | 17.0 % | VS17-046b | Sanidine | Iron Point | FCT-NM (1C31-20) | 28.201           | 0.082 | Kuiper et al (2008) | 9.51702            | 0.157 | 0.00163134 | 0.157 | 298.622       | 0.137 | 0.999948  | 0.043 | 1            | 3.54E-14               | 29  | MAY   | 2020 | 4    | 15  | 1      |
| 20F11380                                                                     | 17.0 % | VS17-046b | Sanidine | Iron Point | FCT-NM (1C31-20) | 28.201           | 0.082 | Kuiper et al (2008) | 9.51702            | 0.157 | 0.00163134 | 0.157 | 298.622       | 0.137 | 0.999948  | 0.043 | 1            | 3.54E-14               | 29  | MAY   | 2020 | 4    | 32  | 1      |
| 20F11381                                                                     | 17.0 % | VS17-046b | Sanidine | Iron Point | FCT-NM (1C31-20) | 28.201           | 0.082 | Kuiper et al (2008) | 9.51702            | 0.157 | 0.00163134 | 0.157 | 298.622       | 0.137 | 0.999948  | 0.043 | 1            | 3.54E-14               | 29  | MAY   | 2020 | 4    | 41  | 1      |



20F11333.AGE >>> VS17-046B >>> OREGON | SWENTON (18-58) PROJECT

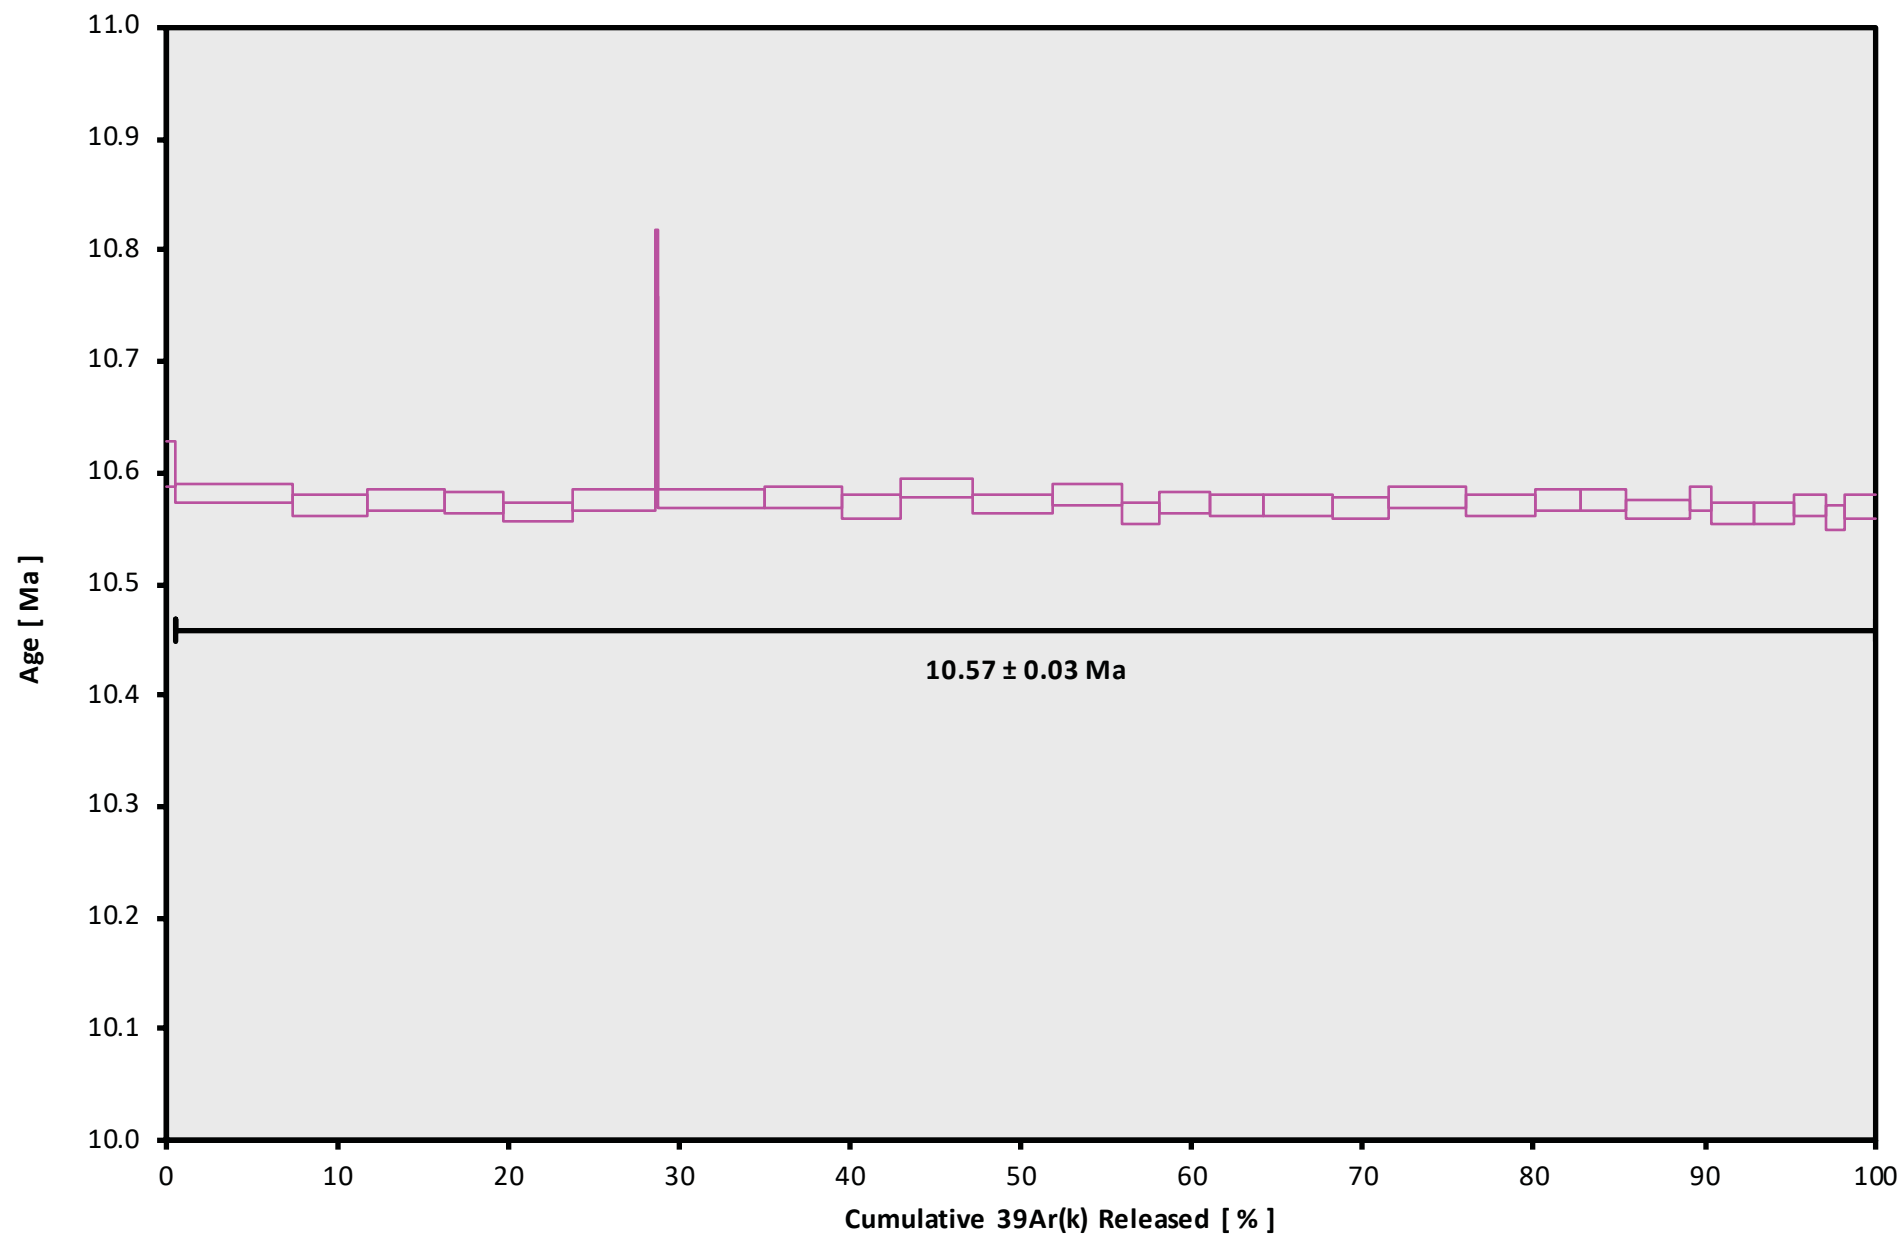

**Ar-Ages in Ma**

**WEIGHTED PLATEAU**  
10.57 ± 0.03

**TOTAL FUSION**  
10.57 ± 0.03

**NORMAL ISOCHRON**  
10.57 ± 0.03

**INVERSE ISOCHRON**  
10.57 ± 0.03

**MSWD (PROBABILITY)**  
1.66 (2%)

**Sample Info**

Sanidine  
Iron Point  
Dan Miggins

IRR = 20-OSU-01 (1C31-

20F11333.AGE >>> VS17-046B >>> OREGON | SWENTON (18-58) PROJECT

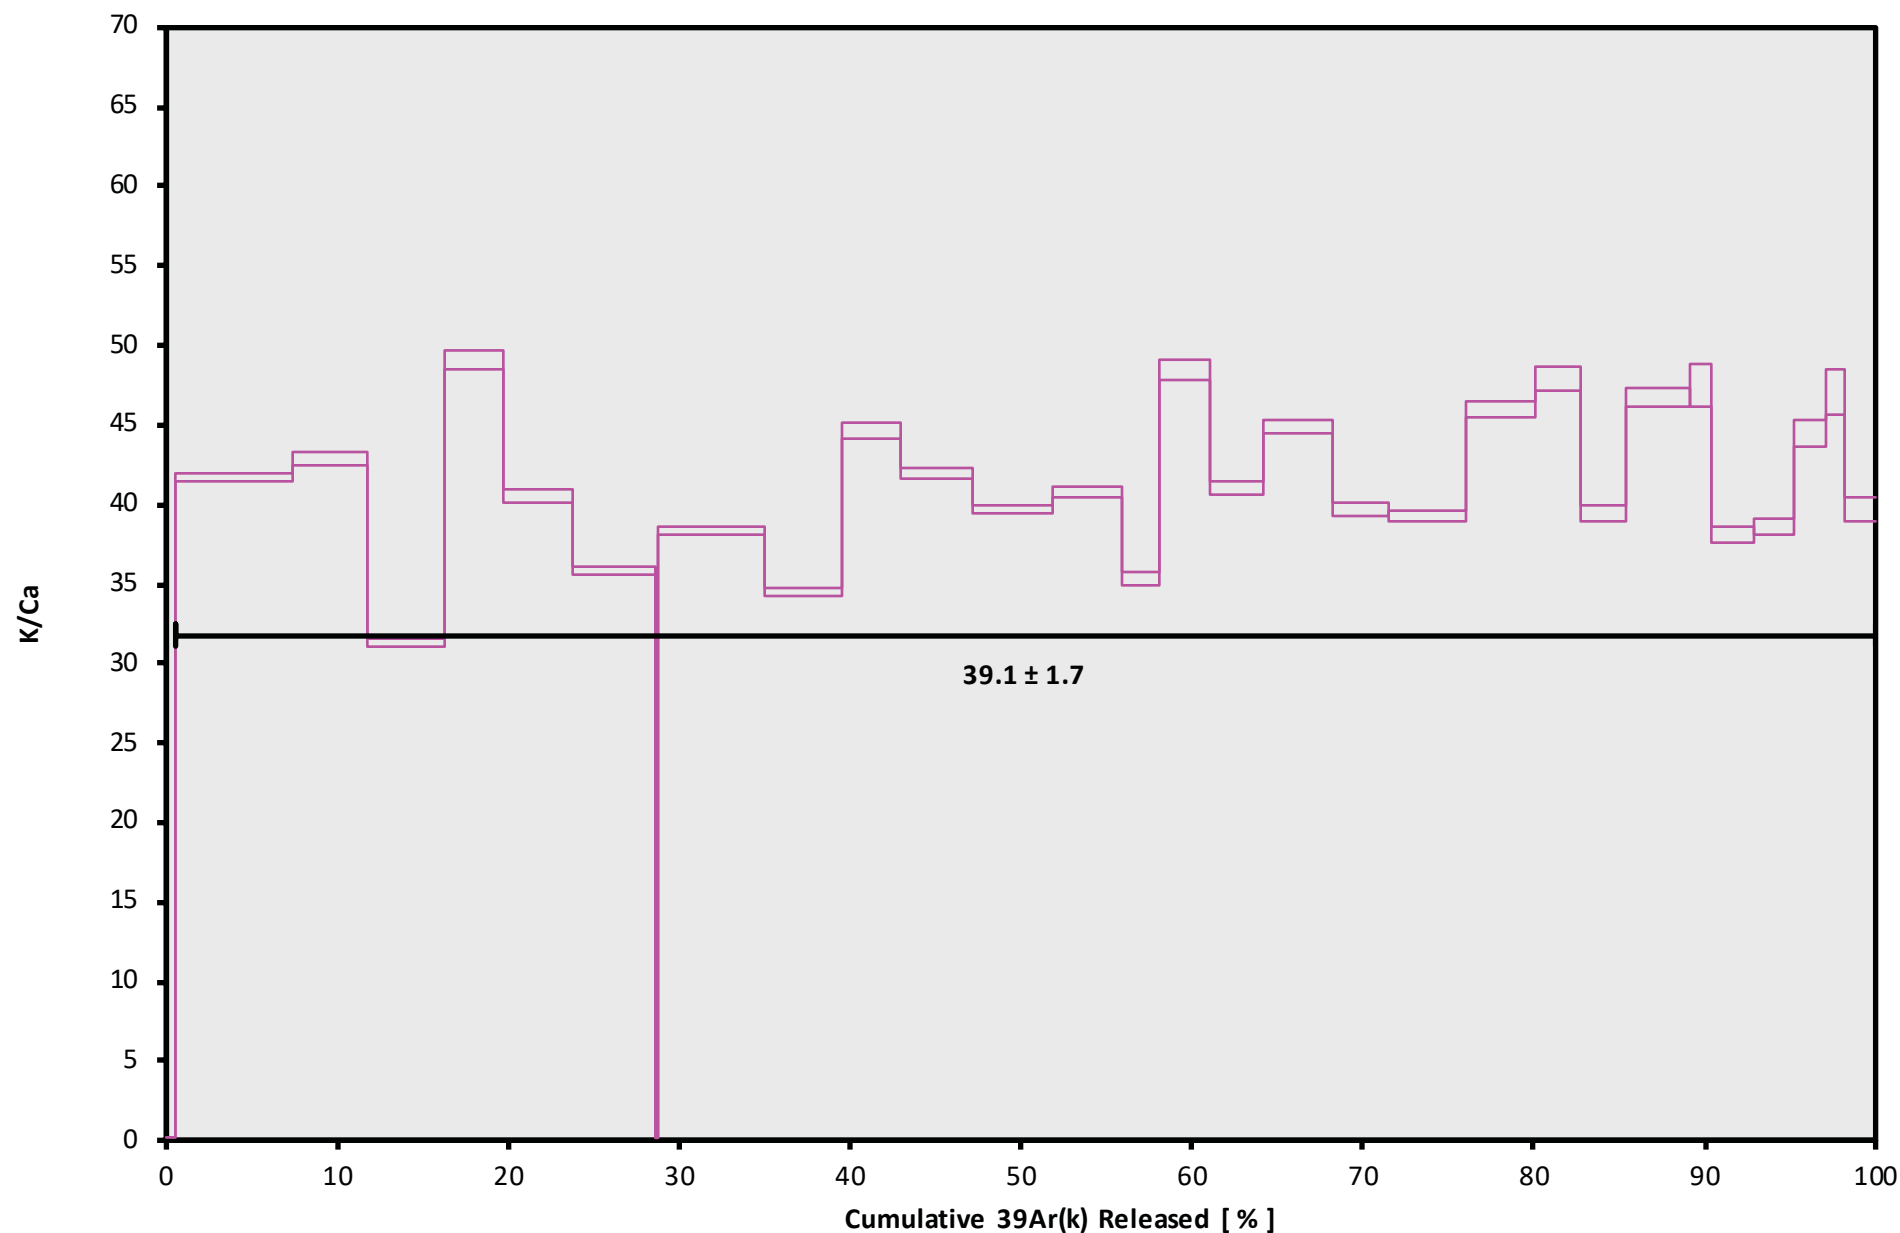

Ar-Ages in Ma

WEIGHTED PLATEAU

$10.57 \pm 0.03$

TOTAL FUSION

$10.57 \pm 0.03$

NORMAL ISOCHRON

$10.57 \pm 0.03$

INVERSE ISOCHRON

$10.57 \pm 0.03$

Sample Info

Sanidine

Iron Point

Dan Miggins

IRR = 20-OSU-01 (1C31-

20F11333.AGE >>> VS17-046B >>> OREGON | SWENTON (18-58) PROJECT

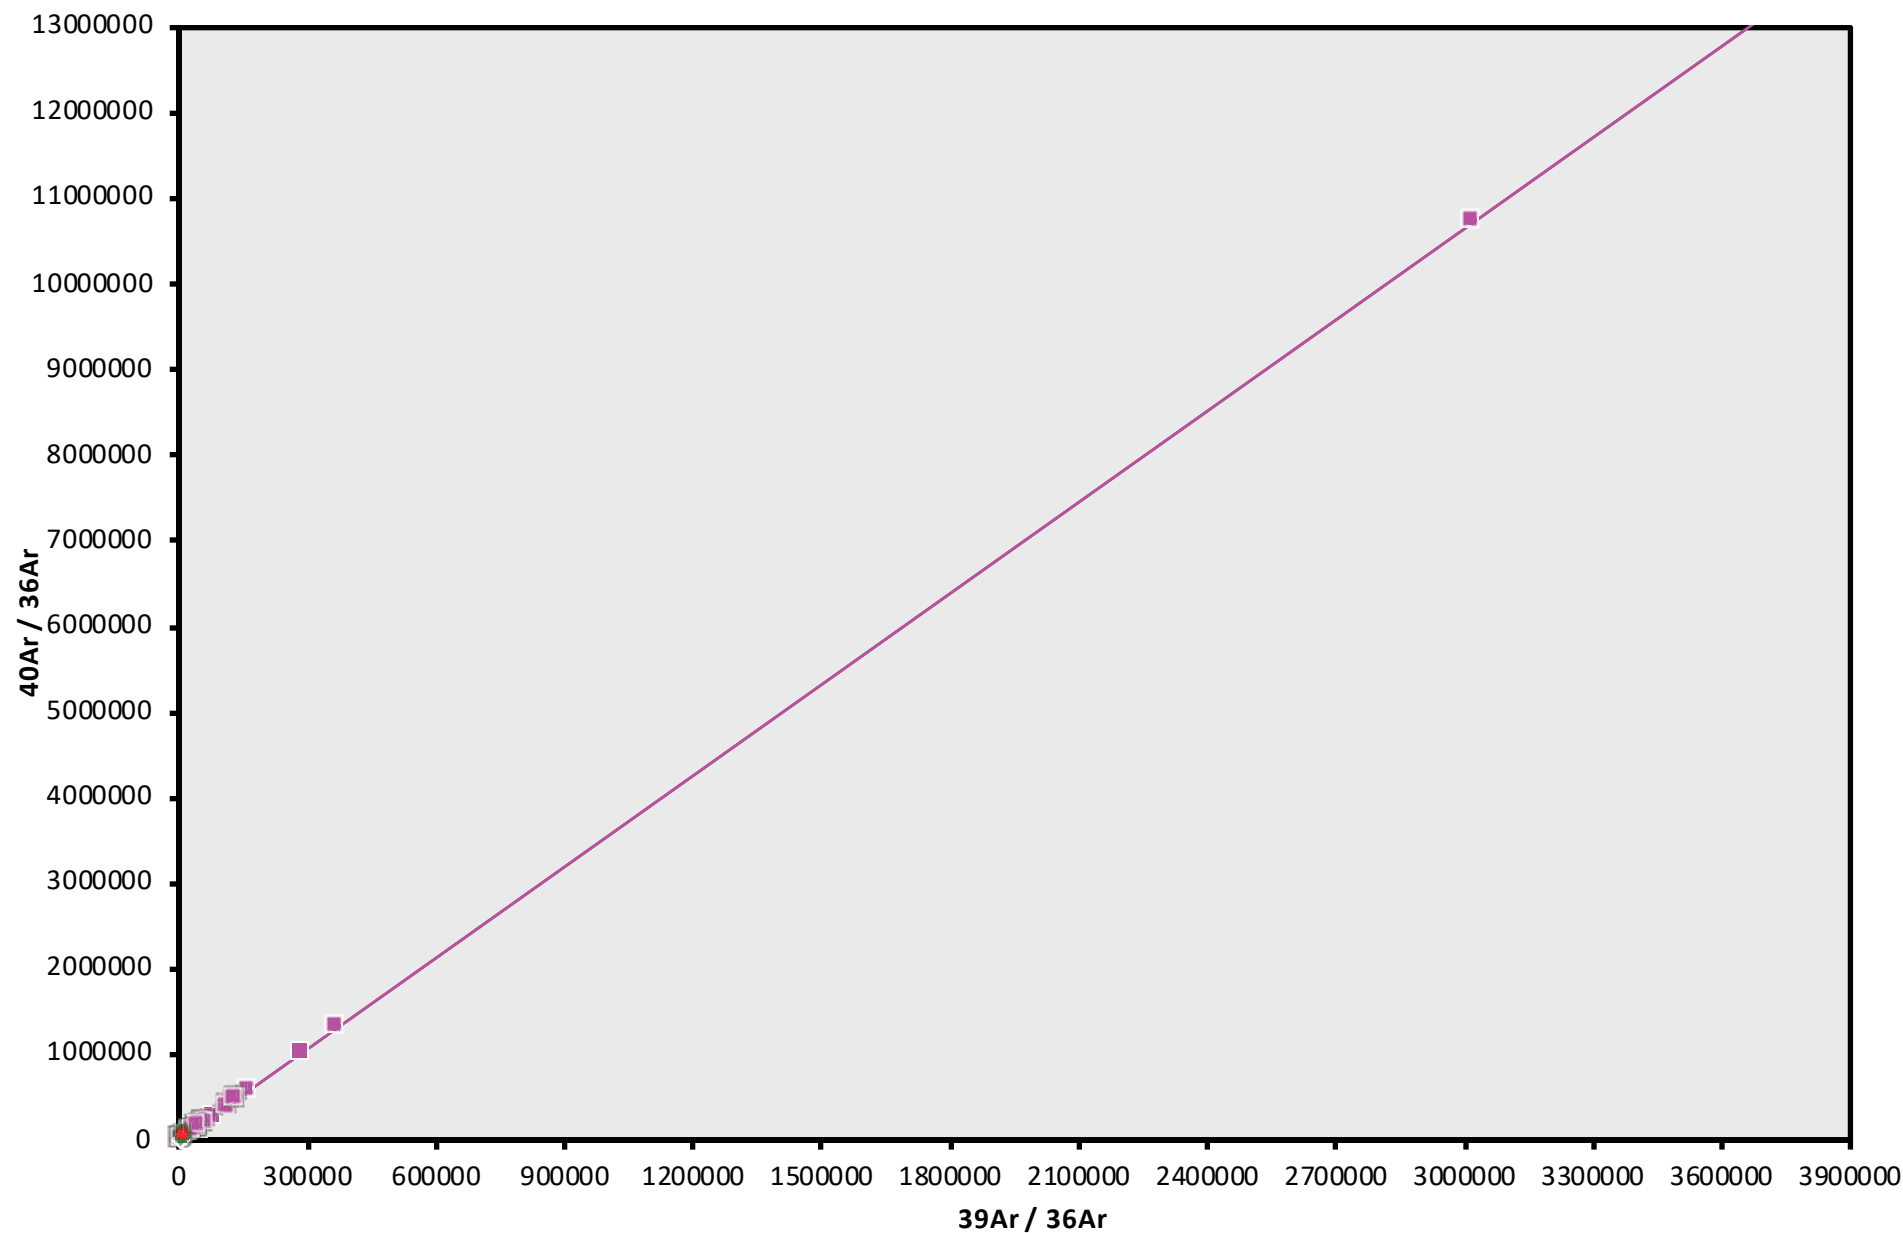

Ar-Ages in Ma

WEIGHTED PLATEAU

10.57 ± 0.03

TOTAL FUSION

10.57 ± 0.03

NORMAL ISOCHRON

10.57 ± 0.03

INVERSE ISOCHRON

10.57 ± 0.03

MSWD (PROBABILITY)

1.71 (1%)

40AR/36AR INTERCEPT

Sample Info

Sanidine  
Iron Point  
Dan Miggins

IRR = 20-OSU-01 (1C31-20)



20F11333.AGE >>> VS17-046B >>> OREGON | SWENTON (18-58) PROJECT

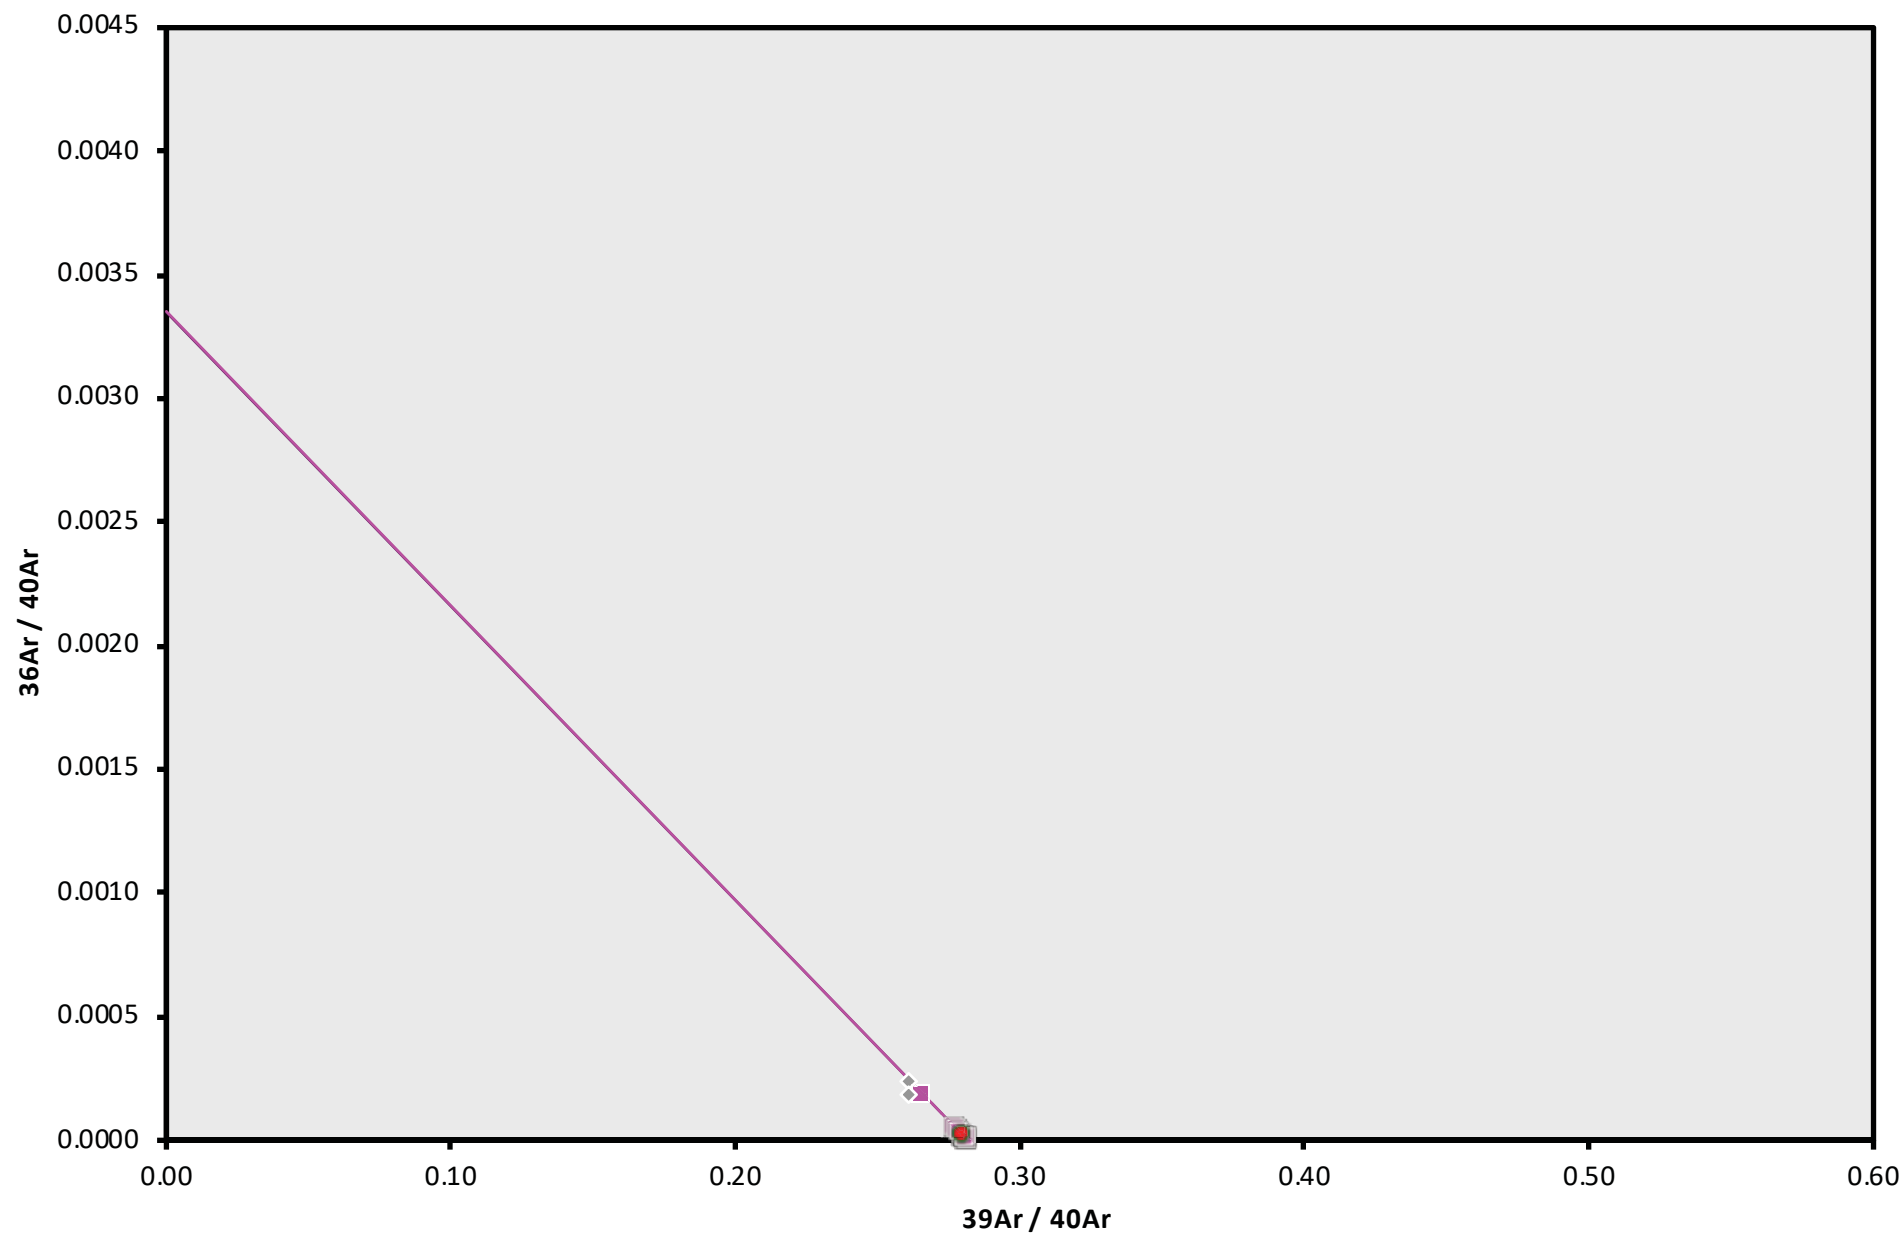

Ar-Ages in Ma

WEIGHTED PLATEAU

$10.57 \pm 0.03$

TOTAL FUSION

$10.57 \pm 0.03$

NORMAL ISOCHRON

$10.57 \pm 0.03$

INVERSE ISOCHRON

$10.57 \pm 0.03$

MSWD (PROBABILITY)

1.72 (1%)

SPREADING FACTOR

Sample Info

Sanidine

Iron Point

Dan Miggins

IRR = 20-OSU-01 (1C31-

| Relative Abundances |        |   | 36Ar<br>[fA] | %1σ   | 37Ar<br>[fA] | %1σ   | 38Ar<br>[fA] | %1σ   | 39Ar<br>[fA] | %1σ   | 40Ar<br>[fA] | %1σ   | 40(r)/39(k) ± 2σ | Age ± 2σ<br>(Ma) | 40Ar(r)<br>(%) | 39Ar(k)<br>(%) | K/Ca ± 2σ |
|---------------------|--------|---|--------------|-------|--------------|-------|--------------|-------|--------------|-------|--------------|-------|------------------|------------------|----------------|----------------|-----------|
| 20F04675            | 17.0 % | ✓ | 0.0075502    | 4.979 | 5.98455      | 2.778 | 3.078305     | 0.323 | 257.9304     | 0.043 | 923.238      | 0.005 | 3.57199 ±0.00319 | 10.21 ±0.01      | 99.79          | 3.51           | 18.5 ±1.0 |
| 20F04676            | 17.0 % | ✓ | 0.0183237    | 2.315 | 7.63644      | 2.267 | 4.478071     | 0.228 | 373.0338     | 0.042 | 1338.281     | 0.004 | 3.57399 ±0.00311 | 10.21 ±0.01      | 99.62          | 5.07           | 21.0 ±1.0 |
| 20F04678            | 17.0 % | ✓ | 0.1014361    | 0.643 | 4.36576      | 3.849 | 2.189386     | 0.438 | 181.0729     | 0.043 | 677.731      | 0.006 | 3.57700 ±0.00380 | 10.22 ±0.01      | 95.57          | 2.46           | 17.8 ±1.4 |
| 20F04679            | 17.0 % | ✓ | 0.0211551    | 2.078 | 9.77867      | 1.679 | 4.707814     | 0.221 | 393.3790     | 0.042 | 1414.479     | 0.004 | 3.58112 ±0.00310 | 10.23 ±0.01      | 99.59          | 5.35           | 17.3 ±0.6 |
| 20F04681            | 17.0 % | ✓ | 0.0049499    | 8.443 | 5.84679      | 2.840 | 3.933387     | 0.261 | 326.9181     | 0.042 | 1168.386     | 0.004 | 3.57030 ±0.00314 | 10.20 ±0.01      | 99.90          | 4.45           | 24.0 ±1.4 |
| 20F04682            | 17.0 % |   | 0.2201945    | 0.399 | 3.02130      | 5.530 | 1.604460     | 0.584 | 130.5821     | 0.043 | 535.895      | 0.007 | 3.60176 ±0.00523 | 10.29 ±0.01      | 87.76          | 1.78           | 18.6 ±2.1 |
| 20F04684            | 17.0 % | ✓ | 0.0104399    | 3.830 | 4.76352      | 3.513 | 2.646429     | 0.386 | 218.6347     | 0.043 | 782.821      | 0.006 | 3.56745 ±0.00326 | 10.19 ±0.01      | 99.63          | 2.97           | 19.7 ±1.4 |
| 20F04685            | 17.0 % | ✓ | 0.0152784    | 2.345 | 6.87265      | 2.461 | 4.109411     | 0.263 | 340.4867     | 0.042 | 1220.677     | 0.005 | 3.57277 ±0.00310 | 10.21 ±0.01      | 99.65          | 4.63           | 21.3 ±1.0 |
| 20F04687            | 17.0 % |   | 0.0051816    | 6.651 | 4.42221      | 3.427 | 2.648660     | 0.337 | 220.1014     | 0.043 | 790.671      | 0.006 | 3.58634 ±0.00323 | 10.25 ±0.01      | 99.83          | 2.99           | 21.4 ±1.5 |
| 20F04688            | 17.0 % | ✓ | 0.0072797    | 4.982 | 4.36724      | 3.592 | 2.407590     | 0.387 | 199.5184     | 0.043 | 714.631      | 0.006 | 3.57210 ±0.00327 | 10.21 ±0.01      | 99.73          | 2.71           | 19.6 ±1.4 |
| 20F04690            | 17.0 % | ✓ | 0.0154496    | 2.455 | 4.99644      | 3.421 | 2.586511     | 0.380 | 214.4397     | 0.043 | 769.406      | 0.006 | 3.56780 ±0.00326 | 10.19 ±0.01      | 99.44          | 2.92           | 18.5 ±1.3 |
| 20F04691            | 17.0 % | ✓ | 0.0284499    | 1.439 | 5.72986      | 2.858 | 3.117058     | 0.333 | 260.3843     | 0.042 | 938.397      | 0.004 | 3.57249 ±0.00319 | 10.21 ±0.01      | 99.13          | 3.54           | 19.5 ±1.1 |
| 20F04693            | 17.0 % | ✓ | 0.0075615    | 5.030 | 2.71492      | 5.867 | 1.851594     | 0.463 | 152.5465     | 0.043 | 547.440      | 0.007 | 3.57475 ±0.00347 | 10.21 ±0.01      | 99.61          | 2.07           | 24.2 ±2.8 |
| 20F04694            | 17.0 % | ✓ | 0.1438126    | 0.512 | 7.82064      | 2.099 | 4.567299     | 0.223 | 381.1142     | 0.042 | 1405.456     | 0.004 | 3.57619 ±0.00325 | 10.22 ±0.01      | 96.97          | 5.18           | 21.0 ±0.9 |
| 20F04696            | 17.0 % | ✓ | 0.0987147    | 0.566 | 4.84097      | 3.334 | 3.572346     | 0.292 | 297.4563     | 0.042 | 1092.618     | 0.005 | 3.57487 ±0.00326 | 10.21 ±0.01      | 97.32          | 4.05           | 26.4 ±1.8 |
| 20F04697            | 17.0 % | ✓ | 0.0257844    | 1.616 | 4.87823      | 3.442 | 2.620096     | 0.391 | 217.1781     | 0.043 | 782.963      | 0.005 | 3.57098 ±0.00329 | 10.20 ±0.01      | 99.05          | 2.95           | 19.1 ±1.3 |
| 20F04699            | 17.0 % | ✓ | 0.0427923    | 1.086 | 8.17898      | 1.989 | 3.684330     | 0.270 | 305.4203     | 0.042 | 1105.810     | 0.005 | 3.58040 ±0.00319 | 10.23 ±0.01      | 98.89          | 4.15           | 16.1 ±0.6 |
| 20F04700            | 17.0 % | ✓ | 0.0101280    | 3.655 | 3.71631      | 4.249 | 2.020839     | 0.475 | 168.3433     | 0.043 | 603.347      | 0.007 | 3.56729 ±0.00338 | 10.19 ±0.01      | 99.53          | 2.29           | 19.5 ±1.7 |
| 20F04702            | 17.0 % | ✓ | 0.0111226    | 3.521 | 6.09849      | 2.362 | 2.855384     | 0.358 | 238.1215     | 0.043 | 852.960      | 0.005 | 3.56961 ±0.00322 | 10.20 ±0.01      | 99.65          | 3.24           | 16.8 ±0.8 |
| 20F04703            | 17.0 % | ✓ | 0.0400347    | 1.205 | 6.22223      | 2.378 | 3.635466     | 0.274 | 302.0255     | 0.042 | 1092.430     | 0.004 | 3.57854 ±0.00320 | 10.22 ±0.01      | 98.94          | 4.11           | 20.9 ±1.0 |
| 20F04705            | 17.0 % | ✓ | 0.0943883    | 0.621 | 3.01284      | 5.479 | 1.562789     | 0.637 | 129.0931     | 0.044 | 490.008      | 0.007 | 3.57881 ±0.00420 | 10.22 ±0.01      | 94.28          | 1.76           | 18.4 ±2.0 |
| 20F04706            | 17.0 % | ✓ | 0.0455509    | 0.962 | 6.04058      | 2.583 | 3.627762     | 0.284 | 301.8695     | 0.042 | 1092.718     | 0.004 | 3.57584 ±0.00317 | 10.22 ±0.01      | 98.78          | 4.11           | 21.5 ±1.1 |
| 20F04708            | 17.0 % |   | 1.0341736    | 0.230 | 3.69524      | 4.221 | 2.231353     | 0.448 | 170.7514     | 0.043 | 958.540      | 0.005 | 3.80659 ±0.00971 | 10.87 ±0.03      | 67.81          | 2.32           | 19.9 ±1.7 |
| 20F04709            | 17.0 % | ✓ | 0.0499555    | 1.130 | 6.66890      | 2.534 | 3.797659     | 0.274 | 314.5215     | 0.042 | 1139.393     | 0.004 | 3.57636 ±0.00324 | 10.22 ±0.01      | 98.72          | 4.28           | 20.3 ±1.0 |
| 20F04711            | 17.0 % | ✓ | 0.0345559    | 1.416 | 7.70665      | 2.123 | 4.116471     | 0.241 | 341.3824     | 0.042 | 1228.731     | 0.004 | 3.57033 ±0.00316 | 10.20 ±0.01      | 99.19          | 4.64           | 19.0 ±0.8 |
| 20F04712            | 17.0 % | ✓ | 0.0177236    | 2.358 | 3.09495      | 5.231 | 1.822555     | 0.531 | 151.0141     | 0.043 | 544.541      | 0.007 | 3.57195 ±0.00355 | 10.21 ±0.01      | 99.06          | 2.05           | 21.0 ±2.2 |
| 20F04714            | 17.0 % | ✓ | 0.0120066    | 3.044 | 4.50864      | 3.400 | 2.245243     | 0.468 | 186.7136     | 0.043 | 669.388      | 0.006 | 3.56731 ±0.00332 | 10.19 ±0.01      | 99.50          | 2.54           | 17.8 ±1.2 |
| 20F04715            | 17.0 % | ✓ | 0.0126109    | 2.888 | 2.71047      | 5.559 | 1.394830     | 0.694 | 117.6730     | 0.044 | 423.975      | 0.008 | 3.57230 ±0.00368 | 10.21 ±0.01      | 99.15          | 1.60           | 18.7 ±2.1 |
| 20F04717            | 17.0 % |   | 0.0065338    | 5.444 | 5.55709      | 2.924 | 3.369447     | 0.305 | 281.3415     | 0.042 | 1010.988     | 0.005 | 3.58756 ±0.00315 | 10.25 ±0.01      | 99.83          | 3.83           | 21.8 ±1.3 |
| 20F04718            | 17.0 % |   | 0.4426798    | 0.279 | 3.53751      | 4.508 | 2.228542     | 0.430 | 179.7164     | 0.043 | 780.261      | 0.005 | 3.60723 ±0.00537 | 10.31 ±0.02      | 83.08          | 2.44           | 21.8 ±2.0 |
| Σ                   |        |   | 2.5858181    | 0.142 | 158.78908    | 0.558 | 88.711086    | 0.062 | 7352.7635    | 0.008 | 27096.182    | 0.001 |                  |                  |                |                |           |

Information on Analysis  
and Constants Used in Calculations

Project = **SWENTON (18-58)**  
Sample = **VS17-054**  
Material = **Sanidine**  
Location = **Unidentified flow**  
Region = **Eastern Oregon**  
Analyst = **Dan Miggins**  
Irradiation = **19-OSU-02 (2C41-19)**  
Position = **X: 0 | Y: 0 | Z/H: 50.97527 mm**  
FCT-NM Age = **28.201 ±0.023 Ma**  
FCT-NM Reference = **Kuiper et al (2008)**  
FCT-NM 40Ar/39Ar Ratio = **9.91958 ±0.01359**  
FCT-NMJ-value = **0.00156514 ±0.00000214**  
Air Shot 40Ar/36Ar = **299.5190 ±0.3924**  
Air Shot MDF = **0.99919852 ±0.00041736 (LIN)**  
Experiment Type = **Total Fusion**  
Extraction Method = **Single Crystal Laser Heating**  
Heating = **62 sec**  
Isolation = **1.62 min**  
Instrument = **ARGUS-VI-F**  
Preferred Age = **Ideogram Age**  
Age Classification = **Eruption Age**  
IGSN = **Undefined**  
Rock Class = **Undefined**  
Lithology = **Undefined**  
Lat-Lon = **Undefined - Undefined**

Age Equations = **Min et al. (2000)**  
Negative Intensities = **Allowed**  
Collector Calibrations = **36Ar**  
Decay 40K = **5.463 ±0.107 E-10 1/a**  
Decay 39Ar = **2.940 ±0.016 E-07 1/h**  
Decay 37Ar = **8.230 ±0.012 E-04 1/h**  
Decay 36Cl = **2.257 ±0.015 E-06 1/a**  
Decay 40K(EC, β<sup>+</sup>) = **0.580 ±0.014 E-10 1/a**  
Decay 40K(β<sup>-</sup>) = **4.884 ±0.099 E-10 1/a**  
Atmospheric 40/36(a) = **298.56 ±0.31**  
Atmospheric 38/36(a) = **0.1885 ±0.0003**  
Production 39/37(ca) = **0.0006425 ±0.0000059**  
Production 38/37(ca) = **0.0001800 ±0.0000173**  
Production 36/37(ca) = **0.0002703 ±0.0000005**  
Production 40/39(k) = **0.000607 ±0.000059**  
Production 38/39(k) = **0.012077 ±0.000011**  
Production 36/38(cl) = **262.80 ±1.71**  
Scaling Ratio K/Ca = **0.430**  
Abundance Ratio 40K/K = **1.1700 ±0.0100 E-04**  
Atomic Weight K = **39.0983 ±0.0001 g**

Results

40(a)/36(a) ± 2σ

40(r)/39(k) ± 2σ

Age ± 2σ  
(Ma)

M\$WD

39Ar(k)  
(%,n)

K/Ca ± 2σ

Age Plateau  
Error Mean

3.57325 ±0.00162 ±0.05%

10.21 ±0.03 ±0.28%

6.02 0% 1.58 2.4545

86.64 25

19.1 ±0.9

2σ Confidence Limit

Error Magnification

Total Fusion Age

3.58136 ±0.00067 ±0.02%

10.23 ±0.03 ±0.27%

30

19.9 ±0.2

2σ Confidence Limit

Error Magnification

Normal Isochron

Error Chron

314.61 ±10.24 ±3.26%

3.57037 ±0.00201 ±0.06%

10.20 ±0.03 ±0.28%

5.31 0% 1.59 2.3042

86.64 25

19.9 ±0.2

2σ Confidence Limit

Error Magnification

1 Number of Iterations

0.0000001018 Convergence

Inverse Isochron

Error Chron

310.33 ±9.96 ±3.21%

3.57176 ±0.00196 ±0.05%

10.20 ±0.03 ±0.28%

5.06 0% 1.59 2.2487

86.64 25

19.9 ±0.2

2σ Confidence Limit

Error Magnification

2 Number of Iterations

0.0004740987 Convergence

6% Spreading Factor

| Incremental Heating |        |   | 36Ar(a)<br>[fA] | 37Ar(ca)<br>[fA] | 38Ar(cl)<br>[fA] | 39Ar(k)<br>[fA] | 40Ar(r)<br>[fA] | Age ± 2σ<br>(Ma) | 40Ar(r)<br>(%) | 39Ar(k)<br>(%) | K/Ca ± 2σ |
|---------------------|--------|---|-----------------|------------------|------------------|-----------------|-----------------|------------------|----------------|----------------|-----------|
| 20F04675            | 17.0 % | ✓ | 0.0059326       | 5.98455          | 0.0000000        | 257.9266        | 921.310         | 10.21 ±0.01      | 99.79          | 3.51           | 18.5 ±1.0 |
| 20F04676            | 17.0 % | ✓ | 0.0162595       | 7.63644          | 0.0000000        | 373.0288        | 1333.201        | 10.21 ±0.01      | 99.62          | 5.07           | 21.0 ±1.0 |
| 20F04678            | 17.0 % | ✓ | 0.1002561       | 4.36576          | 0.0000000        | 181.0701        | 647.689         | 10.22 ±0.01      | 95.57          | 2.46           | 17.8 ±1.4 |
| 20F04679            | 17.0 % | ✓ | 0.0185119       | 9.77867          | 0.0000000        | 393.3727        | 1408.714        | 10.23 ±0.01      | 99.59          | 5.35           | 17.3 ±0.6 |
| 20F04681            | 17.0 % | ✓ | 0.0033695       | 5.84679          | 0.0000000        | 326.9143        | 1167.181        | 10.20 ±0.01      | 99.90          | 4.45           | 24.0 ±1.4 |
| 20F04682            | 17.0 % |   | 0.2193779       | 3.02130          | 0.0000000        | 130.5801        | 470.318         | 10.29 ±0.01      | 87.76          | 1.78           | 18.6 ±2.1 |
| 20F04684            | 17.0 % | ✓ | 0.0091515       | 4.76352          | 0.0034325        | 218.6316        | 779.956         | 10.19 ±0.01      | 99.63          | 2.97           | 19.7 ±1.4 |
| 20F04685            | 17.0 % | ✓ | 0.0134207       | 6.87265          | 0.0000000        | 340.4823        | 1216.464        | 10.21 ±0.01      | 99.65          | 4.63           | 21.3 ±1.0 |
| 20F04687            | 17.0 % |   | 0.0039863       | 4.42221          | 0.0000000        | 220.0985        | 789.348         | 10.25 ±0.01      | 99.83          | 2.99           | 21.4 ±1.5 |
| 20F04688            | 17.0 % | ✓ | 0.0060992       | 4.36724          | 0.0000000        | 199.5156        | 712.689         | 10.21 ±0.01      | 99.73          | 2.71           | 19.6 ±1.4 |
| 20F04690            | 17.0 % | ✓ | 0.0140990       | 4.99644          | 0.0000000        | 214.4365        | 765.067         | 10.19 ±0.01      | 99.44          | 2.92           | 18.5 ±1.3 |
| 20F04691            | 17.0 % | ✓ | 0.0269012       | 5.72986          | 0.0000000        | 260.3806        | 930.207         | 10.21 ±0.01      | 99.13          | 3.54           | 19.5 ±1.1 |
| 20F04693            | 17.0 % | ✓ | 0.0068259       | 2.71492          | 0.0075357        | 152.5448        | 545.310         | 10.21 ±0.01      | 99.61          | 2.07           | 24.2 ±2.8 |
| 20F04694            | 17.0 % | ✓ | 0.1416987       | 7.82064          | 0.0000000        | 381.1091        | 1362.919        | 10.22 ±0.01      | 96.97          | 5.18           | 21.0 ±0.9 |
| 20F04696            | 17.0 % | ✓ | 0.0974062       | 4.84097          | 0.0000000        | 297.4532        | 1063.356        | 10.21 ±0.01      | 97.32          | 4.05           | 26.4 ±1.8 |
| 20F04697            | 17.0 % | ✓ | 0.0244658       | 4.87823          | 0.0000000        | 217.1750        | 775.527         | 10.20 ±0.01      | 99.05          | 2.95           | 19.1 ±1.3 |
| 20F04699            | 17.0 % | ✓ | 0.0405815       | 8.17898          | 0.0000000        | 305.4150        | 1093.508        | 10.23 ±0.01      | 98.89          | 4.15           | 16.1 ±0.6 |
| 20F04700            | 17.0 % | ✓ | 0.0091235       | 3.71631          | 0.0000000        | 168.3409        | 600.521         | 10.19 ±0.01      | 99.53          | 2.29           | 19.5 ±1.7 |
| 20F04702            | 17.0 % | ✓ | 0.0094741       | 6.09849          | 0.0000000        | 238.1176        | 849.987         | 10.20 ±0.01      | 99.65          | 3.24           | 16.8 ±0.8 |
| 20F04703            | 17.0 % | ✓ | 0.0383528       | 6.22223          | 0.0000000        | 302.0215        | 1080.796        | 10.22 ±0.01      | 98.94          | 4.11           | 20.9 ±1.0 |
| 20F04705            | 17.0 % | ✓ | 0.0935739       | 3.01284          | 0.0000000        | 129.0911        | 461.992         | 10.22 ±0.01      | 94.28          | 1.76           | 18.4 ±2.0 |
| 20F04706            | 17.0 % | ✓ | 0.0439181       | 6.04058          | 0.0000000        | 301.8656        | 1079.422        | 10.22 ±0.01      | 98.78          | 4.11           | 21.5 ±1.1 |
| 20F04708            | 17.0 % |   | 1.0331748       | 3.69524          | 0.0000000        | 170.7491        | 649.971         | 10.87 ±0.03      | 67.81          | 2.32           | 19.9 ±1.7 |
| 20F04709            | 17.0 % | ✓ | 0.0481529       | 6.66890          | 0.0000000        | 314.5172        | 1124.826        | 10.22 ±0.01      | 98.72          | 4.28           | 20.3 ±1.0 |
| 20F04711            | 17.0 % | ✓ | 0.0324728       | 7.70665          | 0.0000000        | 341.3774        | 1218.829        | 10.20 ±0.01      | 99.19          | 4.64           | 19.0 ±0.8 |
| 20F04712            | 17.0 % | ✓ | 0.0168871       | 3.09495          | 0.0000000        | 151.0121        | 539.407         | 10.21 ±0.01      | 99.06          | 2.05           | 21.0 ±2.2 |
| 20F04714            | 17.0 % | ✓ | 0.0107879       | 4.50864          | 0.0000000        | 186.7107        | 666.054         | 10.19 ±0.01      | 99.50          | 2.54           | 17.8 ±1.2 |
| 20F04715            | 17.0 % | ✓ | 0.0118783       | 2.71047          | 0.0000000        | 117.6713        | 420.357         | 10.21 ±0.01      | 99.15          | 1.60           | 18.7 ±2.1 |
| 20F04717            | 17.0 % |   | 0.0050317       | 5.55709          | 0.0000000        | 281.3379        | 1009.315        | 10.25 ±0.01      | 99.83          | 3.83           | 21.8 ±1.3 |
| 20F04718            | 17.0 % |   | 0.4417236       | 3.53751          | 0.0000000        | 179.7142        | 648.271         | 10.31 ±0.02      | 83.08          | 2.44           | 21.8 ±2.0 |

Σ 2.5428948 158.78908 0.0109682 7352.6615 26332.512

| Information on Analysis                                                                                                                                                                                                                                     | Results     | 40(r)/39(k) ± 2σ | Age ± 2σ<br>(Ma) | MSWD                | 39Ar(k)<br>(%,n)    | K/Ca ± 2σ           |
|-------------------------------------------------------------------------------------------------------------------------------------------------------------------------------------------------------------------------------------------------------------|-------------|------------------|------------------|---------------------|---------------------|---------------------|
| Project = SWENTON (18-58)<br>Sample = VS17-054<br>Material = Sanidine<br>Location = Unidentified flow<br>Region = Eastern Oregon<br>Analyst = Dan Miggins<br>Irradiation = 19-OSU-02 (2C41-19)<br>J = 0.00156514 ± 0.00000214<br>FCT-NM = 28.201 ± 0.023 Ma | Age Plateau | 3.57325          | ±0.00162         | 10.21               | ±0.03               | 6.02                |
|                                                                                                                                                                                                                                                             | Error Mean  |                  | ±0.05%           |                     | ±0.28%              | 0%                  |
|                                                                                                                                                                                                                                                             |             |                  |                  | Full External Error | ±0.53               | 1.58                |
|                                                                                                                                                                                                                                                             |             |                  |                  | Analytical Error    | ±0.00               | 2.4545              |
|                                                                                                                                                                                                                                                             |             |                  |                  |                     | 2σ Confidence Limit | Error Magnification |
| Total Fusion Age                                                                                                                                                                                                                                            |             | 3.58136          | ±0.00067         | 10.23               | ±0.03               | 30                  |
|                                                                                                                                                                                                                                                             |             |                  | ±0.02%           |                     | ±0.27%              | 19.9 ±0.2           |
|                                                                                                                                                                                                                                                             |             |                  |                  | Full External Error | ±0.53               |                     |
|                                                                                                                                                                                                                                                             |             |                  |                  | Analytical Error    | ±0.00               |                     |
|                                                                                                                                                                                                                                                             |             |                  |                  |                     |                     |                     |

| Normal Isochron |        |   | 39(k)/36(a) ± 2σ   | 40(a+r)/36(a) ± 2σ  | r.i.   |
|-----------------|--------|---|--------------------|---------------------|--------|
| 20F04675        | 17.0 % | ✓ | 43476.36 ±5548.96  | 155595.54 ±19858.48 | 1.0000 |
| 20F04676        | 17.0 % | ✓ | 22942.15 ±1204.73  | 82293.54 ±4320.83   | 0.9999 |
| 20F04678        | 17.0 % | ✓ | 1806.08 ±23.63     | 6758.90 ±88.23      | 0.9978 |
| 20F04679        | 17.0 % | ✓ | 21249.72 ±1014.40  | 76396.30 ±3646.39   | 0.9998 |
| 20F04681        | 17.0 % | ✓ | 97021.35 ±24206.12 | 346693.61 ±86497.02 | 1.0000 |
| 20F04682        | 17.0 % |   | 595.23 ±4.81       | 2442.43 ±19.62      | 0.9941 |
| 20F04684        | 17.0 % | ✓ | 23890.23 ±2100.94  | 85525.63 ±7520.88   | 1.0000 |
| 20F04685        | 17.0 % | ✓ | 25369.90 ±1365.49  | 90939.30 ±4894.04   | 0.9999 |
| 20F04687        | 17.0 % |   | 55214.22 ±9614.05  | 198315.39 ±34530.82 | 1.0000 |
| 20F04688        | 17.0 % | ✓ | 32711.64 ±3916.71  | 117147.72 ±14026.27 | 1.0000 |
| 20F04690        | 17.0 % | ✓ | 15209.32 ±824.41   | 54562.39 ±2957.16   | 0.9999 |
| 20F04691        | 17.0 % | ✓ | 9679.16 ±296.46    | 34877.25 ±1067.83   | 0.9996 |
| 20F04693        | 17.0 % | ✓ | 22348.07 ±2506.51  | 80187.39 ±8993.37   | 1.0000 |
| 20F04694        | 17.0 % | ✓ | 2689.57 ±28.07     | 9916.99 ±103.18     | 0.9967 |
| 20F04696        | 17.0 % | ✓ | 3053.74 ±35.26     | 11215.28 ±129.17    | 0.9973 |
| 20F04697        | 17.0 % | ✓ | 8876.68 ±304.29    | 31996.98 ±1096.53   | 0.9997 |
| 20F04699        | 17.0 % | ✓ | 7525.97 ±173.21    | 27244.53 ±626.61    | 0.9993 |
| 20F04700        | 17.0 % | ✓ | 18451.44 ±1507.31  | 66120.19 ±5401.12   | 0.9999 |
| 20F04702        | 17.0 % | ✓ | 25133.42 ±2088.38  | 90015.08 ±7479.13   | 0.9999 |
| 20F04703        | 17.0 % | ✓ | 7874.82 ±198.88    | 28478.93 ±718.83    | 0.9994 |
| 20F04705        | 17.0 % | ✓ | 1379.56 ±17.37     | 5235.75 ±65.78      | 0.9975 |
| 20F04706        | 17.0 % | ✓ | 6873.37 ±137.97    | 24876.60 ±498.90    | 0.9991 |
| 20F04708        | 17.0 % |   | 165.27 ±0.77       | 927.66 ±4.27        | 0.9827 |
| 20F04709        | 17.0 % | ✓ | 6531.64 ±153.77    | 23658.03 ±556.61    | 0.9993 |
| 20F04711        | 17.0 % | ✓ | 10512.73 ±318.19   | 37832.44 ±1144.63   | 0.9996 |
| 20F04712        | 17.0 % | ✓ | 8942.47 ±445.10    | 32240.60 ±1604.50   | 0.9998 |
| 20F04714        | 17.0 % | ✓ | 17307.43 ±1180.15  | 62039.46 ±4229.99   | 0.9999 |
| 20F04715        | 17.0 % | ✓ | 9906.42 ±611.31    | 35687.22 ±2202.01   | 0.9999 |
| 20F04717        | 17.0 % |   | 55913.21 ±7966.03  | 200890.29 ±28620.62 | 1.0000 |
| 20F04718        | 17.0 % |   | 406.85 ±2.30       | 1766.15 ±9.87       | 0.9883 |

| Results         | 40(a)/36(a) ± 2σ      | 40(r)/39(k) ± 2σ | Age ± 2σ (Ma)             | MSWD            |
|-----------------|-----------------------|------------------|---------------------------|-----------------|
| Normal Isochron | 314.61 ±10.24         | 3.57037 ±0.00201 | 10.20 ±0.03               | 5.31            |
| Error Chron     | ±3.26%                | ±0.06%           | ±0.28%                    | 0%              |
|                 |                       |                  | Full External Error ±0.53 |                 |
|                 |                       |                  | Analytical Error ±0.01    |                 |
|                 |                       |                  |                           |                 |
| Statistics      | 2σ Confidence Limit   | 1.59             | Convergence               | 0.000000101775  |
|                 | Error Magnification   | 2.3042           | Number of Iterations      | 1               |
|                 | Number of Data Points | 25               | Calculated Line           | Weighted York-2 |

| Inverse Isochron |        |   | 39(k)/40(a+r) ± 2σ   | 36(a)/40(a+r) ± 2σ     | r.i.   |
|------------------|--------|---|----------------------|------------------------|--------|
| 20F04675         | 17.0 % | ✓ | 0.2794191 ±0.0002396 | 0.00000643 ±0.00000082 | 0.0001 |
| 20F04676         | 17.0 % | ✓ | 0.2787844 ±0.0002368 | 0.00001215 ±0.00000064 | 0.0002 |
| 20F04678         | 17.0 % | ✓ | 0.2672144 ±0.0002321 | 0.00014795 ±0.00000193 | 0.0014 |
| 20F04679         | 17.0 % | ✓ | 0.2781512 ±0.0002351 | 0.00001309 ±0.00000062 | 0.0002 |
| 20F04681         | 17.0 % | ✓ | 0.2798475 ±0.0002383 | 0.00000288 ±0.00000072 | 0.0000 |
| 20F04682         | 17.0 % |   | 0.2437034 ±0.0002139 | 0.00040943 ±0.00000329 | 0.0033 |
| 20F04684         | 17.0 % | ✓ | 0.2793341 ±0.0002406 | 0.00001169 ±0.00000103 | 0.0002 |
| 20F04685         | 17.0 % | ✓ | 0.2789762 ±0.0002372 | 0.00001100 ±0.00000059 | 0.0002 |
| 20F04687         | 17.0 % |   | 0.2784162 ±0.0002402 | 0.00000504 ±0.00000088 | 0.0001 |
| 20F04688         | 17.0 % | ✓ | 0.2792341 ±0.0002407 | 0.00000854 ±0.00000102 | 0.0002 |
| 20F04690         | 17.0 % | ✓ | 0.2787510 ±0.0002404 | 0.00001833 ±0.00000099 | 0.0003 |
| 20F04691         | 17.0 % | ✓ | 0.2775207 ±0.0002370 | 0.00002867 ±0.00000088 | 0.0003 |
| 20F04693         | 17.0 % | ✓ | 0.2786980 ±0.0002438 | 0.00001247 ±0.00000140 | 0.0002 |
| 20F04694         | 17.0 % | ✓ | 0.2712088 ±0.0002300 | 0.00010084 ±0.00000105 | 0.0008 |
| 20F04696         | 17.0 % | ✓ | 0.2722839 ±0.0002324 | 0.00008916 ±0.00000103 | 0.0010 |
| 20F04697         | 17.0 % | ✓ | 0.2774223 ±0.0002394 | 0.00003125 ±0.00000107 | 0.0004 |
| 20F04699         | 17.0 % | ✓ | 0.2762377 ±0.0002360 | 0.00003670 ±0.00000084 | 0.0005 |
| 20F04700         | 17.0 % | ✓ | 0.2790590 ±0.0002430 | 0.00001512 ±0.00000124 | 0.0003 |
| 20F04702         | 17.0 % | ✓ | 0.2792134 ±0.0002395 | 0.00001111 ±0.00000092 | 0.0002 |
| 20F04703         | 17.0 % | ✓ | 0.2765139 ±0.0002360 | 0.00003511 ±0.00000089 | 0.0004 |
| 20F04705         | 17.0 % | ✓ | 0.2634890 ±0.0002331 | 0.00019099 ±0.00000240 | 0.0019 |
| 20F04706         | 17.0 % | ✓ | 0.2762985 ±0.0002352 | 0.00004020 ±0.00000081 | 0.0005 |
| 20F04708         | 17.0 % |   | 0.1781538 ±0.0001544 | 0.00107798 ±0.00000496 | 0.0025 |
| 20F04709         | 17.0 % | ✓ | 0.2760855 ±0.0002356 | 0.00004227 ±0.00000099 | 0.0004 |
| 20F04711         | 17.0 % | ✓ | 0.2778761 ±0.0002365 | 0.00002643 ±0.00000080 | 0.0003 |
| 20F04712         | 17.0 % | ✓ | 0.2773667 ±0.0002432 | 0.00003102 ±0.00000154 | 0.0005 |
| 20F04714         | 17.0 % | ✓ | 0.2789745 ±0.0002429 | 0.00001612 ±0.00000110 | 0.0003 |
| 20F04715         | 17.0 % | ✓ | 0.2775900 ±0.0002470 | 0.00002802 ±0.00000173 | 0.0005 |
| 20F04717         | 17.0 % |   | 0.2783271 ±0.0002368 | 0.00000498 ±0.00000071 | 0.0001 |
| 20F04718         | 17.0 % |   | 0.2303580 ±0.0001984 | 0.00056620 ±0.00000316 | 0.0024 |

| Results          | 40(a)/36(a) ± 2σ      | 40(r)/39(k) ± 2σ | Age ± 2σ (Ma)             | MSWD            |
|------------------|-----------------------|------------------|---------------------------|-----------------|
| Inverse Isochron | 310.33 ±9.96          | 3.57176 ±0.00196 | 10.20 ±0.03               | 5.06            |
| Error Chron      | ±3.21%                | ±0.05%           | ±0.28%                    | 0%              |
|                  |                       |                  | Full External Error ±0.53 |                 |
|                  |                       |                  | Analytical Error ±0.01    |                 |
|                  |                       |                  |                           |                 |
| Statistics       | 2σ Confidence Limit   | 1.59             | Convergence               | 0.0004740987    |
|                  | Error Magnification   | 2.2487           | Number of Iterations      | 2               |
|                  | Number of Data Points | 25               | Calculated Line           | Weighted York-2 |
|                  | Spreading Factor      | 5.8%             |                           |                 |

| Degassing Patterns |        |   | 36Ar(a)<br>[fA] | %1σ   | 36Ar(c)<br>[fA] | %1σ  | 36Ar(ca)<br>[fA] | %1σ       | 36Ar(cl)<br>[fA] | %1σ       | 37Ar(ca)<br>[fA] | %1σ  | 38Ar(a)<br>[fA] | %1σ   | 38Ar(c)<br>[fA] | %1σ  | 38Ar(k)<br>[fA] | %1σ  | 38Ar(ca)<br>[fA] | %1σ   | 38Ar(cl)<br>[fA] | %1σ    | 39Ar(k)<br>[fA] | %1σ       | 39Ar(ca)<br>[fA] | %1σ  |
|--------------------|--------|---|-----------------|-------|-----------------|------|------------------|-----------|------------------|-----------|------------------|------|-----------------|-------|-----------------|------|-----------------|------|------------------|-------|------------------|--------|-----------------|-----------|------------------|------|
| 20F04675           | 17.0 % | ✓ | 0.0059326       | 6.38  | 0.0000000       | 0.00 | 0.0016176        | 2.78      | 0.0000000        | 0.00      | 5.98455          | 2.78 | 0.0011183       | 6.38  | 0.0000000       | 0.00 | 3.114979        | 0.10 | 0.0010772        | 10.02 | 0.0000000        | 0.00   | 257.9266        | 0.04      | 0.0038451        | 2.93 |
| 20F04676           | 17.0 % | ✓ | 0.0162595       | 2.63  | 0.0000000       | 0.00 | 0.0020641        | 2.27      | 0.0000000        | 0.00      | 7.63644          | 2.27 | 0.0030649       | 2.63  | 0.0000000       | 0.00 | 4.505069        | 0.10 | 0.0013746        | 9.89  | 0.0000000        | 0.00   | 373.0288        | 0.04      | 0.0049064        | 2.45 |
| 20F04678           | 17.0 % | ✓ | 0.1002561       | 0.65  | 0.0000000       | 0.00 | 0.0011801        | 3.85      | 0.0000000        | 0.00      | 4.36576          | 3.85 | 0.0188983       | 0.67  | 0.0000000       | 0.00 | 2.186784        | 0.10 | 0.0007858        | 10.37 | 0.0000000        | 0.00   | 181.0701        | 0.04      | 0.0028050        | 3.96 |
| 20F04679           | 17.0 % | ✓ | 0.0185119       | 2.39  | 0.0000000       | 0.00 | 0.0026432        | 1.69      | 0.0000000        | 0.00      | 9.77867          | 1.68 | 0.0034895       | 2.39  | 0.0000000       | 0.00 | 4.750762        | 0.10 | 0.0017602        | 9.78  | 0.0000000        | 0.00   | 393.3727        | 0.04      | 0.0062828        | 1.91 |
| 20F04681           | 17.0 % | ✓ | 0.0033695       | 12.47 | 0.0000000       | 0.00 | 0.0015804        | 2.85      | 0.0000000        | 0.00      | 5.84679          | 2.84 | 0.0006352       | 12.48 | 0.0000000       | 0.00 | 3.948144        | 0.10 | 0.0010524        | 10.04 | 0.0000000        | 0.00   | 326.9143        | 0.04      | 0.0037566        | 2.99 |
| 20F04682           | 17.0 % |   | 0.2193779       | 0.40  | 0.0000000       | 0.00 | 0.0008167        | 5.53      | 0.0000000        | 0.00      | 3.02130          | 5.53 | 0.0413527       | 0.43  | 0.0000000       | 0.00 | 1.577016        | 0.10 | 0.0005438        | 11.10 | 0.0000000        | 0.00   | 130.5801        | 0.04      | 0.0019412        | 5.61 |
| 20F04684           | 17.0 % | ✓ | 0.0091515       | 4.40  | 0.0000000       | 0.00 | 0.0012876        | 3.52      | 0.0000008        | 353.10    | 4.76352          | 3.51 | 0.0017251       | 4.40  | 0.0000000       | 0.00 | 2.640414        | 0.10 | 0.0008574        | 10.25 | 0.0034325        | 353.10 | 218.6316        | 0.04      | 0.0030606        | 3.63 |
| 20F04685           | 17.0 % | ✓ | 0.0134207       | 2.69  | 0.0000000       | 0.00 | 0.0018577        | 2.47      | 0.0000000        | 0.00      | 6.87265          | 2.46 | 0.0025298       | 2.70  | 0.0000000       | 0.00 | 4.112005        | 0.10 | 0.0012371        | 9.94  | 0.0000000        | 0.00   | 340.4823        | 0.04      | 0.0044157        | 2.63 |
| 20F04687           | 17.0 % |   | 0.0039863       | 8.71  | 0.0000000       | 0.00 | 0.0011953        | 3.43      | 0.0000000        | 0.00      | 4.42221          | 3.43 | 0.0007514       | 8.71  | 0.0000000       | 0.00 | 2.658130        | 0.10 | 0.0007960        | 10.22 | 0.0000000        | 0.00   | 220.0985        | 0.04      | 0.0028413        | 3.55 |
| 20F04688           | 17.0 % | ✓ | 0.0060992       | 5.99  | 0.0000000       | 0.00 | 0.0011805        | 3.60      | 0.0000000        | 0.00      | 4.36724          | 3.59 | 0.0011497       | 5.99  | 0.0000000       | 0.00 | 2.409550        | 0.10 | 0.0007861        | 10.28 | 0.0000000        | 0.00   | 199.5156        | 0.04      | 0.0028060        | 3.71 |
| 20F04690           | 17.0 % | ✓ | 0.0140990       | 2.71  | 0.0000000       | 0.00 | 0.0013505        | 3.43      | 0.0000000        | 0.00      | 4.99644          | 3.42 | 0.0026577       | 2.71  | 0.0000000       | 0.00 | 2.589749        | 0.10 | 0.0008994        | 10.22 | 0.0000000        | 0.00   | 214.4365        | 0.04      | 0.0032102        | 3.54 |
| 20F04691           | 17.0 % | ✓ | 0.0269012       | 1.53  | 0.0000000       | 0.00 | 0.0015488        | 2.86      | 0.0000000        | 0.00      | 5.72986          | 2.86 | 0.0050709       | 1.54  | 0.0000000       | 0.00 | 3.144617        | 0.10 | 0.0010314        | 10.05 | 0.0000000        | 0.00   | 260.3806        | 0.04      | 0.0036814        | 3.00 |
| 20F04693           | 17.0 % | ✓ | 0.0068259       | 5.61  | 0.0000000       | 0.00 | 0.0007338        | 5.87      | 0.0000018        | 128.68    | 2.71492          | 5.87 | 0.0012867       | 5.61  | 0.0000000       | 0.00 | 1.842283        | 0.10 | 0.0004887        | 11.28 | 0.0075357        | 128.68 | 152.5448        | 0.04      | 0.0017443        | 5.94 |
| 20F04694           | 17.0 % | ✓ | 0.1416987       | 0.52  | 0.0000000       | 0.00 | 0.0021139        | 2.11      | 0.0000000        | 0.00      | 7.82064          | 2.10 | 0.0267102       | 0.54  | 0.0000000       | 0.00 | 4.602655        | 0.10 | 0.0014077        | 9.86  | 0.0000000        | 0.00   | 381.1091        | 0.04      | 0.0050248        | 2.29 |
| 20F04696           | 17.0 % | ✓ | 0.0974062       | 0.58  | 0.0000000       | 0.00 | 0.0013085        | 3.34      | 0.0000000        | 0.00      | 4.84097          | 3.33 | 0.0183611       | 0.60  | 0.0000000       | 0.00 | 3.592342        | 0.10 | 0.0008714        | 10.19 | 0.0000000        | 0.00   | 297.4532        | 0.04      | 0.0031103        | 3.46 |
| 20F04697           | 17.0 % | ✓ | 0.0244658       | 1.71  | 0.0000000       | 0.00 | 0.0013186        | 3.45      | 0.0000000        | 0.00      | 4.87823          | 3.44 | 0.0046118       | 1.72  | 0.0000000       | 0.00 | 2.622822        | 0.10 | 0.0008781        | 10.23 | 0.0000000        | 0.00   | 217.1750        | 0.04      | 0.0031343        | 3.56 |
| 20F04699           | 17.0 % | ✓ | 0.0405815       | 1.15  | 0.0000000       | 0.00 | 0.0022108        | 2.00      | 0.0000000        | 0.00      | 8.17898          | 1.99 | 0.0076496       | 1.16  | 0.0000000       | 0.00 | 3.688497        | 0.10 | 0.0014722        | 9.83  | 0.0000000        | 0.00   | 305.4150        | 0.04      | 0.0052550        | 2.19 |
| 20F04700           | 17.0 % | ✓ | 0.0091235       | 4.08  | 0.0000000       | 0.00 | 0.0010045        | 4.25      | 0.0000000        | 0.00      | 3.71631          | 4.25 | 0.0017198       | 4.09  | 0.0000000       | 0.00 | 2.033053        | 0.10 | 0.0006689        | 10.53 | 0.0000000        | 0.00   | 168.3409        | 0.04      | 0.0023877        | 4.35 |
| 20F04702           | 17.0 % | ✓ | 0.0094741       | 4.15  | 0.0000000       | 0.00 | 0.0016484        | 2.37      | 0.0000000        | 0.00      | 6.09849          | 2.36 | 0.0017859       | 4.16  | 0.0000000       | 0.00 | 2.875746        | 0.10 | 0.0010977        | 9.92  | 0.0000000        | 0.00   | 238.1176        | 0.04      | 0.0039183        | 2.53 |
| 20F04703           | 17.0 % | ✓ | 0.0383528       | 1.26  | 0.0000000       | 0.00 | 0.0016819        | 2.38      | 0.0000000        | 0.00      | 6.22223          | 2.38 | 0.0072295       | 1.27  | 0.0000000       | 0.00 | 3.647513        | 0.10 | 0.0011200        | 9.92  | 0.0000000        | 0.00   | 302.0215        | 0.04      | 0.0039978        | 2.55 |
| 20F04705           | 17.0 % | ✓ | 0.0935739       | 0.63  | 0.0000000       | 0.00 | 0.0008144        | 5.48      | 0.0000000        | 0.00      | 3.01284          | 5.48 | 0.0176387       | 0.65  | 0.0000000       | 0.00 | 1.559033        | 0.10 | 0.0005423        | 11.08 | 0.0000000        | 0.00   | 129.0911        | 0.04      | 0.0019358        | 5.56 |
| 20F04706           | 17.0 % | ✓ | 0.0439181       | 1.00  | 0.0000000       | 0.00 | 0.0016328        | 2.59      | 0.0000000        | 0.00      | 6.04058          | 2.58 | 0.0082786       | 1.02  | 0.0000000       | 0.00 | 3.645631        | 0.10 | 0.0010873        | 9.97  | 0.0000000        | 0.00   | 301.8656        | 0.04      | 0.0038811        | 2.74 |
| 20F04708           | 17.0 % |   | 1.0331748       | 0.23  | 0.0000000       | 0.00 | 0.0009988        | 4.22      | 0.0000000        | 0.00      | 3.69524          | 4.22 | 0.1947534       | 0.28  | 0.0000000       | 0.00 | 2.062136        | 0.10 | 0.0006651        | 10.51 | 0.0000000        | 0.00   | 170.7491        | 0.04      | 0.0023742        | 4.32 |
| 20F04709           | 17.0 % | ✓ | 0.0481529       | 1.18  | 0.0000000       | 0.00 | 0.0018026        | 2.54      | 0.0000000        | 0.00      | 6.66890          | 2.53 | 0.0090768       | 1.19  | 0.0000000       | 0.00 | 3.798424        | 0.10 | 0.0012004        | 9.96  | 0.0000000        | 0.00   | 314.5172        | 0.04      | 0.0042848        | 2.70 |
| 20F04711           | 17.0 % | ✓ | 0.0324728       | 1.51  | 0.0000000       | 0.00 | 0.0020831        | 2.13      | 0.0000000        | 0.00      | 7.70665          | 2.12 | 0.0061211       | 1.52  | 0.0000000       | 0.00 | 4.122815        | 0.10 | 0.0013872        | 9.86  | 0.0000000        | 0.00   | 341.3774        | 0.04      | 0.0049515        | 2.31 |
| 20F04712           | 17.0 % | ✓ | 0.0168871       | 2.49  | 0.0000000       | 0.00 | 0.0008366        | 5.23      | 0.0000000        | 0.00      | 3.09495          | 5.23 | 0.0031832       | 2.49  | 0.0000000       | 0.00 | 1.823773        | 0.10 | 0.0005571        | 10.96 | 0.0000000        | 0.00   | 151.0121        | 0.04      | 0.0019885        | 5.31 |
| 20F04714           | 17.0 % | ✓ | 0.0107879       | 3.41  | 0.0000000       | 0.00 | 0.0012187        | 3.40      | 0.0000000        | 0.00      | 4.50864          | 3.40 | 0.0020335       | 3.41  | 0.0000000       | 0.00 | 2.254905        | 0.10 | 0.0008116        | 10.21 | 0.0000000        | 0.00   | 186.7107        | 0.04      | 0.0028968        | 3.52 |
| 20F04715           | 17.0 % | ✓ | 0.0118783       | 3.09  | 0.0000000       | 0.00 | 0.0007326        | 5.56      | 0.0000000        | 0.00      | 2.71047          | 5.56 | 0.0022391       | 3.09  | 0.0000000       | 0.00 | 1.421116        | 0.10 | 0.0004879        | 11.12 | 0.0000000        | 0.00   | 117.6713        | 0.04      | 0.0017415        | 5.63 |
| 20F04717           | 17.0 % |   | 0.0050317       | 7.12  | 0.0000000       | 0.00 | 0.0015021        | 2.93      | 0.0000000        | 0.00      | 5.55709          | 2.92 | 0.0009485       | 7.13  | 0.0000000       | 0.00 | 3.397718        | 0.10 | 0.0010003        | 10.06 | 0.0000000        | 0.00   | 281.3379        | 0.04      | 0.0035704        | 3.07 |
| 20F04718           | 17.0 % |   | 0.4417236       | 0.28  | 0.0000000       | 0.00 | 0.0009562        | 4.51      | 0.0000000        | 0.00      | 3.53751          | 4.51 | 0.0832649       | 0.32  | 0.0000000       | 0.00 | 2.170408        | 0.10 | 0.0006368        | 10.63 | 0.0000000        | 0.00   | 179.7142        | 0.04      | 0.0022728        | 4.60 |
| Σ                  |        |   | 2.5428948       | 0.14  | 0.0000000       | 0.00 | 0.0429207        | 0.56      | 0.0000027        | 141.50    | 158.78908        | 0.56 | 0.4793357       | 0.16  | 0.0000000       | 0.00 | 88.798092       | 0.02 | 0.0285820        | 1.94  | 0.0109682        | 141.52 | 7352.6615       | 0.01      | 0.1020220        | 0.59 |
| Σ                  |        |   |                 |       |                 |      |                  | 2.5858181 | 0.14             | 158.78908 | 0.56             |      |                 |       |                 |      |                 |      | 89.316978        | 0.03  |                  |        |                 | 7352.7635 | 0.01             |      |

| 40Ar(r)<br>[fA] | %1σ  | 40Ar(a)<br>[fA] | %1σ   | 40Ar(c)<br>[fA] | %1σ  | 40Ar(k)<br>[fA] | %1σ  |
|-----------------|------|-----------------|-------|-----------------|------|-----------------|------|
| 921.310         | 0.01 | 1.77123         | 6.38  | 0.0000000       | 0.00 | 0.1565614       | 9.65 |
| 1333.201        | 0.01 | 4.85445         | 2.63  | 0.0000000       | 0.00 | 0.2264285       | 9.65 |
| 647.689         | 0.03 | 29.93245        | 0.66  | 0.0000000       | 0.00 | 0.1099095       | 9.65 |
| 1408.714        | 0.01 | 5.52691         | 2.39  | 0.0000000       | 0.00 | 0.2387772       | 9.65 |
| 1167.181        | 0.01 | 1.00600         | 12.47 | 0.0000000       | 0.00 | 0.1984370       | 9.65 |
| 470.318         | 0.06 | 65.49746        | 0.41  | 0.0000000       | 0.00 | 0.0792621       | 9.65 |
| 779.956         | 0.02 | 2.73227         | 4.40  | 0.0000000       | 0.00 | 0.1327094       | 9.65 |
| 1216.464        | 0.01 | 4.00689         | 2.69  | 0.0000000       | 0.00 | 0.2066728       | 9.65 |
| 789.348         | 0.01 | 1.19014         | 8.71  | 0.0000000       | 0.00 | 0.1335998       | 9.65 |
| 712.689         | 0.02 | 1.82098         | 5.99  | 0.0000000       | 0.00 | 0.1211060       | 9.65 |
| 765.067         | 0.02 | 4.20940         | 2.71  | 0.0000000       | 0.00 | 0.1301629       | 9.65 |
| 930.207         | 0.01 | 8.03161         | 1.53  | 0.0000000       | 0.00 | 0.1580510       | 9.65 |
| 545.310         | 0.02 | 2.03793         | 5.61  | 0.0000000       | 0.00 | 0.0925947       | 9.65 |
| 1362.919        | 0.02 | 42.30555        | 0.53  | 0.0000000       | 0.00 | 0.2313333       | 9.65 |
| 1063.356        | 0.02 | 29.08159        | 0.59  | 0.0000000       | 0.00 | 0.1805541       | 9.65 |
| 775.527         | 0.02 | 7.30451         | 1.72  | 0.0000000       | 0.00 | 0.1318252       | 9.65 |
| 1093.508        | 0.01 | 12.11602        | 1.15  | 0.0000000       | 0.00 | 0.1853869       | 9.65 |
| 600.521         | 0.02 | 2.72390         | 4.09  | 0.0000000       | 0.00 | 0.1021829       | 9.65 |
| 849.987         | 0.01 | 2.82860         | 4.16  | 0.0000000       | 0.00 | 0.1445374       | 9.65 |
| 1080.796        | 0.01 | 11.45061        | 1.27  | 0.0000000       | 0.00 | 0.1833270       | 9.65 |
| 461.992         | 0.04 | 27.93744        | 0.64  | 0.0000000       | 0.00 | 0.0783583       | 9.65 |
| 1079.422        | 0.01 | 13.11220        | 1.01  | 0.0000000       | 0.00 | 0.1832324       | 9.65 |
| 649.971         | 0.12 | 308.46466       | 0.25  | 0.0000000       | 0.00 | 0.1036447       | 9.65 |
| 1124.826        | 0.02 | 14.37652        | 1.18  | 0.0000000       | 0.00 | 0.1909120       | 9.65 |
| 1218.829        | 0.01 | 9.69507         | 1.52  | 0.0000000       | 0.00 | 0.2072161       | 9.65 |
| 539.407         | 0.02 | 5.04180         | 2.49  | 0.0000000       | 0.00 | 0.0916643       | 9.65 |
| 666.054         | 0.02 | 3.22083         | 3.41  | 0.0000000       | 0.00 | 0.1133334       | 9.65 |
| 420.357         | 0.03 | 3.54638         | 3.09  | 0.0000000       | 0.00 | 0.0714265       | 9.65 |
| 1009.315        | 0.01 | 1.50226         | 7.12  | 0.0000000       | 0.00 | 0.1707721       | 9.65 |
| 648.271         | 0.06 | 131.88099       | 0.30  | 0.0000000       | 0.00 | 0.1090865       | 9.65 |
| 26332.512       | 0.00 | 759.20666       | 0.15  | 0.0000000       | 0.00 | 4.4630655       | 1.85 |
|                 |      |                 |       |                 |      | 27096.182       | 0.01 |

| Additional Parameters |        |   | 40Ar/39Ar | 1σ       | 37Ar/39Ar | 1σ       | 36Ar/39Ar | 1σ       | Time (days) | 37Ar (decay) | 39Ar (decay) | 40Ar (moles) |
|-----------------------|--------|---|-----------|----------|-----------|----------|-----------|----------|-------------|--------------|--------------|--------------|
| 20F04675              | 17.0 % | ✓ | 3.579408  | 0.001534 | 0.023202  | 0.000645 | 0.000029  | 0.000001 | 149.300     | 19.133516    | 1.00105490   | 3.268E-11    |
| 20F04676              | 17.0 % | ✓ | 3.587561  | 0.001522 | 0.020471  | 0.000464 | 0.000049  | 0.000001 | 149.306     | 19.135879    | 1.00105494   | 4.738E-11    |
| 20F04678              | 17.0 % | ✓ | 3.742862  | 0.001624 | 0.024111  | 0.000928 | 0.000560  | 0.000004 | 149.318     | 19.140341    | 1.00105503   | 2.399E-11    |
| 20F04679              | 17.0 % | ✓ | 3.595716  | 0.001518 | 0.024858  | 0.000418 | 0.000054  | 0.000001 | 149.324     | 19.142442    | 1.00105507   | 5.007E-11    |
| 20F04681              | 17.0 % | ✓ | 3.573940  | 0.001520 | 0.017885  | 0.000508 | 0.000015  | 0.000001 | 149.335     | 19.146906    | 1.00105515   | 4.136E-11    |
| 20F04682              | 17.0 % |   | 4.103894  | 0.001800 | 0.023137  | 0.001280 | 0.001686  | 0.000007 | 149.342     | 19.149270    | 1.00105519   | 1.897E-11    |
| 20F04684              | 17.0 % | ✓ | 3.580499  | 0.001541 | 0.021788  | 0.000765 | 0.000048  | 0.000002 | 149.353     | 19.153736    | 1.00105528   | 2.771E-11    |
| 20F04685              | 17.0 % | ✓ | 3.585095  | 0.001523 | 0.020185  | 0.000497 | 0.000045  | 0.000001 | 149.360     | 19.156100    | 1.00105532   | 4.321E-11    |
| 20F04687              | 17.0 % |   | 3.592306  | 0.001548 | 0.020092  | 0.000689 | 0.000024  | 0.000002 | 149.372     | 19.160568    | 1.00105540   | 2.799E-11    |
| 20F04688              | 17.0 % | ✓ | 3.581781  | 0.001543 | 0.021889  | 0.000786 | 0.000036  | 0.000002 | 149.377     | 19.162670    | 1.00105544   | 2.530E-11    |
| 20F04690              | 17.0 % | ✓ | 3.587985  | 0.001546 | 0.023300  | 0.000797 | 0.000072  | 0.000002 | 149.389     | 19.167139    | 1.00105553   | 2.724E-11    |
| 20F04691              | 17.0 % | ✓ | 3.603891  | 0.001538 | 0.022005  | 0.000629 | 0.000109  | 0.000002 | 149.395     | 19.169506    | 1.00105557   | 3.322E-11    |
| 20F04693              | 17.0 % | ✓ | 3.588679  | 0.001568 | 0.017797  | 0.001044 | 0.000050  | 0.000002 | 149.407     | 19.173976    | 1.00105565   | 1.938E-11    |
| 20F04694              | 17.0 % | ✓ | 3.687755  | 0.001562 | 0.020520  | 0.000431 | 0.000377  | 0.000002 | 149.413     | 19.176343    | 1.00105570   | 4.975E-11    |
| 20F04696              | 17.0 % | ✓ | 3.673205  | 0.001566 | 0.016275  | 0.000543 | 0.000332  | 0.000002 | 149.425     | 19.180815    | 1.00105578   | 3.868E-11    |
| 20F04697              | 17.0 % | ✓ | 3.605167  | 0.001555 | 0.022462  | 0.000773 | 0.000119  | 0.000002 | 149.431     | 19.182920    | 1.00105582   | 2.772E-11    |
| 20F04699              | 17.0 % | ✓ | 3.620616  | 0.001545 | 0.026779  | 0.000533 | 0.000140  | 0.000002 | 149.442     | 19.187394    | 1.00105590   | 3.915E-11    |
| 20F04700              | 17.0 % | ✓ | 3.584028  | 0.001560 | 0.022076  | 0.000938 | 0.000060  | 0.000002 | 149.449     | 19.189763    | 1.00105595   | 2.136E-11    |
| 20F04702              | 17.0 % | ✓ | 3.582038  | 0.001535 | 0.025611  | 0.000605 | 0.000047  | 0.000002 | 149.460     | 19.194238    | 1.00105603   | 3.019E-11    |
| 20F04703              | 17.0 % | ✓ | 3.617014  | 0.001543 | 0.020602  | 0.000490 | 0.000133  | 0.000002 | 149.467     | 19.196608    | 1.00105608   | 3.867E-11    |
| 20F04705              | 17.0 % | ✓ | 3.795775  | 0.001678 | 0.023339  | 0.001279 | 0.000731  | 0.000005 | 149.478     | 19.201085    | 1.00105616   | 1.735E-11    |
| 20F04706              | 17.0 % | ✓ | 3.619835  | 0.001540 | 0.020011  | 0.000517 | 0.000151  | 0.000001 | 149.484     | 19.203192    | 1.00105620   | 3.868E-11    |
| 20F04708              | 17.0 % |   | 5.613655  | 0.002432 | 0.021641  | 0.000914 | 0.006057  | 0.000014 | 149.496     | 19.207670    | 1.00105628   | 3.393E-11    |
| 20F04709              | 17.0 % | ✓ | 3.622624  | 0.001544 | 0.021203  | 0.000537 | 0.000159  | 0.000002 | 149.502     | 19.210041    | 1.00105633   | 4.033E-11    |
| 20F04711              | 17.0 % | ✓ | 3.599281  | 0.001531 | 0.022575  | 0.000479 | 0.000101  | 0.000001 | 149.514     | 19.214521    | 1.00105641   | 4.350E-11    |
| 20F04712              | 17.0 % | ✓ | 3.605895  | 0.001580 | 0.020494  | 0.001072 | 0.000117  | 0.000003 | 149.520     | 19.216894    | 1.00105645   | 1.928E-11    |
| 20F04714              | 17.0 % | ✓ | 3.585108  | 0.001560 | 0.024147  | 0.000821 | 0.000064  | 0.000002 | 149.532     | 19.221375    | 1.00105654   | 2.370E-11    |
| 20F04715              | 17.0 % | ✓ | 3.602989  | 0.001602 | 0.023034  | 0.001280 | 0.000107  | 0.000003 | 149.537     | 19.223485    | 1.00105658   | 1.501E-11    |
| 20F04717              | 17.0 % |   | 3.593457  | 0.001527 | 0.019752  | 0.000578 | 0.000023  | 0.000001 | 149.549     | 19.227968    | 1.00105666   | 3.579E-11    |
| 20F04718              | 17.0 % |   | 4.341621  | 0.001869 | 0.019684  | 0.000887 | 0.002463  | 0.000007 | 149.556     | 19.230341    | 1.00105670   | 2.762E-11    |



| Procedure<br>Blanks |        | 36Ar ± 1σ (SE)<br>[fA] | 37Ar ± 1σ (SE)<br>[fA] | 38Ar ± 1σ (SE)<br>[fA] | 39Ar ± 1σ (SE)<br>[fA] | 40Ar ± 1σ (SE)<br>[fA] |
|---------------------|--------|------------------------|------------------------|------------------------|------------------------|------------------------|
| 20F04675            | 17.0 % | 0.0082560 ±0.0002132   | 0.0182160 ±0.0058158   | 0.0250322 ±0.0063285   | 0.0182614 ±0.0060590   | 1.8559243 ±0.0144511   |
| 20F04676            | 17.0 % | 0.0082560 ±0.0002132   | 0.0182160 ±0.0058158   | 0.0250322 ±0.0063285   | 0.0182614 ±0.0060590   | 1.8559243 ±0.0144511   |
| 20F04678            | 17.0 % | 0.0093439 ±0.0002130   | 0.0266407 ±0.0063551   | 0.0264448 ±0.0067738   | 0.0320430 ±0.0064493   | 2.0789356 ±0.0141546   |
| 20F04679            | 17.0 % | 0.0093439 ±0.0002130   | 0.0266407 ±0.0063551   | 0.0264448 ±0.0067738   | 0.0320430 ±0.0064493   | 2.0789356 ±0.0141546   |
| 20F04681            | 17.0 % | 0.0087636 ±0.0002127   | 0.0180412 ±0.0062252   | 0.0197213 ±0.0066337   | 0.0364482 ±0.0057582   | 1.9421855 ±0.0184844   |
| 20F04682            | 17.0 % | 0.0087636 ±0.0002127   | 0.0180412 ±0.0062252   | 0.0197213 ±0.0066337   | 0.0364482 ±0.0057582   | 1.9421855 ±0.0184844   |
| 20F04684            | 17.0 % | 0.0101212 ±0.0002046   | 0.0240188 ±0.0058338   | 0.0296031 ±0.0069206   | 0.0227988 ±0.0061820   | 2.3224270 ±0.0148785   |
| 20F04685            | 17.0 % | 0.0101212 ±0.0002046   | 0.0240188 ±0.0058338   | 0.0296031 ±0.0069206   | 0.0227988 ±0.0061820   | 2.3224270 ±0.0148785   |
| 20F04687            | 17.0 % | 0.0087198 ±0.0002138   | 0.0181344 ±0.0053474   | 0.0242898 ±0.0059149   | 0.0335654 ±0.0055865   | 2.0431649 ±0.0170057   |
| 20F04688            | 17.0 % | 0.0087198 ±0.0002138   | 0.0181344 ±0.0053474   | 0.0242898 ±0.0059149   | 0.0335654 ±0.0055865   | 2.0431649 ±0.0170057   |
| 20F04690            | 17.0 % | 0.0081205 ±0.0002195   | 0.0289185 ±0.0059188   | 0.0325244 ±0.0069070   | 0.0162451 ±0.0059076   | 1.9119177 ±0.0150384   |
| 20F04691            | 17.0 % | 0.0081205 ±0.0002195   | 0.0289185 ±0.0059188   | 0.0325244 ±0.0069070   | 0.0162451 ±0.0059076   | 1.9119177 ±0.0150384   |
| 20F04693            | 17.0 % | 0.0084937 ±0.0002343   | 0.0197069 ±0.0060746   | 0.0329717 ±0.0058537   | 0.0209575 ±0.0062061   | 1.8022086 ±0.0169155   |
| 20F04694            | 17.0 % | 0.0084937 ±0.0002343   | 0.0197069 ±0.0060746   | 0.0329717 ±0.0058537   | 0.0209575 ±0.0062061   | 1.8022086 ±0.0169155   |
| 20F04696            | 17.0 % | 0.0080794 ±0.0002009   | 0.0215094 ±0.0059495   | 0.0254868 ±0.0072803   | 0.0314479 ±0.0062802   | 1.8272827 ±0.0141948   |
| 20F04697            | 17.0 % | 0.0080794 ±0.0002009   | 0.0215094 ±0.0059495   | 0.0254868 ±0.0072803   | 0.0314479 ±0.0062802   | 1.8272827 ±0.0141948   |
| 20F04699            | 17.0 % | 0.0079788 ±0.0002296   | 0.0193282 ±0.0057596   | 0.0333070 ±0.0065939   | 0.0219644 ±0.0057136   | 1.9006610 ±0.0171464   |
| 20F04700            | 17.0 % | 0.0079788 ±0.0002296   | 0.0193282 ±0.0057596   | 0.0333070 ±0.0065939   | 0.0219644 ±0.0057136   | 1.9006610 ±0.0171464   |
| 20F04702            | 17.0 % | 0.0083410 ±0.0002129   | 0.0286656 ±0.0050146   | 0.0211627 ±0.0071230   | 0.0196064 ±0.0059428   | 1.9413996 ±0.0144667   |
| 20F04703            | 17.0 % | 0.0083410 ±0.0002129   | 0.0286656 ±0.0050146   | 0.0211627 ±0.0071230   | 0.0196064 ±0.0059428   | 1.9413996 ±0.0144667   |
| 20F04705            | 17.0 % | 0.0083041 ±0.0002157   | 0.0239205 ±0.0059078   | 0.0215575 ±0.0068008   | 0.0424219 ±0.0056691   | 1.7794634 ±0.0145548   |
| 20F04706            | 17.0 % | 0.0083041 ±0.0002157   | 0.0239205 ±0.0059078   | 0.0215575 ±0.0068008   | 0.0424219 ±0.0056691   | 1.7794634 ±0.0145548   |
| 20F04708            | 17.0 % | 0.0173752 ±0.0002446   | 0.0151125 ±0.0058255   | 0.0182970 ±0.0070569   | 0.0336623 ±0.0058177   | 4.5181339 ±0.0142883   |
| 20F04709            | 17.0 % | 0.0173752 ±0.0002446   | 0.0151125 ±0.0058255   | 0.0182970 ±0.0070569   | 0.0336623 ±0.0058177   | 4.5181339 ±0.0142883   |
| 20F04711            | 17.0 % | 0.0079788 ±0.0002296   | 0.0193282 ±0.0057596   | 0.0333070 ±0.0065939   | 0.0219644 ±0.0057136   | 1.9006610 ±0.0171464   |
| 20F04712            | 17.0 % | 0.0079788 ±0.0002296   | 0.0193282 ±0.0057596   | 0.0333070 ±0.0065939   | 0.0219644 ±0.0057136   | 1.9006610 ±0.0171464   |
| 20F04714            | 17.0 % | 0.0083410 ±0.0002129   | 0.0286656 ±0.0050146   | 0.0211627 ±0.0071230   | 0.0196064 ±0.0059428   | 1.9413996 ±0.0144667   |
| 20F04715            | 17.0 % | 0.0083410 ±0.0002129   | 0.0286656 ±0.0050146   | 0.0211627 ±0.0071230   | 0.0196064 ±0.0059428   | 1.9413996 ±0.0144667   |
| 20F04717            | 17.0 % | 0.0083041 ±0.0002157   | 0.0239205 ±0.0059078   | 0.0215575 ±0.0068008   | 0.0424219 ±0.0056691   | 1.7794634 ±0.0145548   |
| 20F04718            | 17.0 % | 0.0083041 ±0.0002157   | 0.0239205 ±0.0059078   | 0.0215575 ±0.0068008   | 0.0424219 ±0.0056691   | 1.7794634 ±0.0145548   |

| Intercept<br>Values |        | 36Ar ± 1σ (SE)<br>[fA] | r2     | Regression<br>(type,n) | 37Ar ± 1σ (SE)<br>[fA] | r2     | Regression<br>(type,n) | 38Ar ± 1σ (SE)<br>[fA] | r2     | Regression<br>(type,n) | 39Ar ± 1σ (SE)<br>[fA] | r2     | Regression<br>(type,n) | 40Ar ± 1σ (SE)<br>[fA] |
|---------------------|--------|------------------------|--------|------------------------|------------------------|--------|------------------------|------------------------|--------|------------------------|------------------------|--------|------------------------|------------------------|
| 20F04675            | 17.0 % | 0.0157287 ±0.0003046   | 0.9795 | EXP 150 of 150         | 0.2938115 ±0.0062790   | 0.2114 | EXP 150 of 150         | 3.0483397 ±0.0072158   | 0.9505 | EXP 150 of 150         | 257.43423 ±0.02081     | 0.9999 | EXP 150 of 150         | 925.09399 ±0.04531     |
| 20F04676            | 17.0 % | 0.0263915 ±0.0003605   | 0.9820 | EXP 147 of 150         | 0.3798897 ±0.0066775   | 0.3127 | EXP 150 of 150         | 4.4458623 ±0.0070943   | 0.9766 | EXP 149 of 150         | 372.32429 ±0.02375     | 1.0000 | EXP 148 of 150         | 1340.13731 ±0.05627    |
| 20F04678            | 17.0 % | 0.1097388 ±0.0005863   | 0.7088 | EXP 150 of 150         | 0.2009038 ±0.0059435   | 0.1137 | EXP 150 of 150         | 2.1594324 ±0.0065056   | 0.9192 | EXP 148 of 150         | 180.70533 ±0.01766     | 0.9999 | EXP 148 of 150         | 679.80983 ±0.03878     |
| 20F04679            | 17.0 % | 0.0302818 ±0.0003777   | 0.9822 | EXP 150 of 150         | 0.4829698 ±0.0052742   | 0.5071 | EXP 148 of 150         | 4.6738236 ±0.0068144   | 0.9802 | EXP 149 of 150         | 392.61802 ±0.02137     | 1.0000 | EXP 150 of 150         | 1416.55825 ±0.04850    |
| 20F04681            | 17.0 % | 0.0136627 ±0.0003546   | 0.9825 | EXP 150 of 150         | 0.2865906 ±0.0058581   | 0.2642 | EXP 149 of 150         | 3.9073613 ±0.0070915   | 0.9699 | EXP 150 of 150         | 326.27582 ±0.02274     | 1.0000 | EXP 149 of 150         | 1170.32788 ±0.04867    |
| 20F04682            | 17.0 % | 0.2266978 ±0.0007615   | 0.3872 | EXP 150 of 150         | 0.1393565 ±0.0060440   | 0.0974 | EXP 150 of 150         | 1.5821669 ±0.0064606   | 0.8718 | EXP 150 of 150         | 130.30361 ±0.01372     | 0.9999 | EXP 149 of 150         | 537.83711 ±0.03541     |
| 20F04684            | 17.0 % | 0.0204540 ±0.0003383   | 0.9704 | EXP 150 of 150         | 0.2240832 ±0.0063814   | 0.1219 | EXP 148 of 150         | 2.6125845 ±0.0071767   | 0.9342 | EXP 150 of 150         | 218.20669 ±0.01831     | 0.9999 | EXP 150 of 150         | 785.14367 ±0.04445     |
| 20F04685            | 17.0 % | 0.0252428 ±0.0002884   | 0.9884 | EXP 147 of 150         | 0.3338903 ±0.0064075   | 0.1837 | EXP 150 of 150         | 4.0732222 ±0.0075076   | 0.9703 | EXP 148 of 150         | 339.83290 ±0.02237     | 1.0000 | EXP 150 of 150         | 1222.99972 ±0.05305    |
| 20F04687            | 17.0 % | 0.0138482 ±0.0002656   | 0.9840 | EXP 149 of 150         | 0.2121089 ±0.0057139   | 0.1670 | EXP 150 of 150         | 2.6201247 ±0.0062957   | 0.9486 | EXP 150 of 150         | 219.65987 ±0.01974     | 0.9999 | EXP 150 of 150         | 792.71454 ±0.04158     |
| 20F04688            | 17.0 % | 0.0159247 ±0.0002881   | 0.9779 | EXP 149 of 150         | 0.2092220 ±0.0060915   | 0.1614 | EXP 150 of 150         | 2.3794413 ±0.0068918   | 0.9287 | EXP 150 of 150         | 199.11503 ±0.01691     | 0.9999 | EXP 149 of 150         | 716.67441 ±0.04010     |
| 20F04690            | 17.0 % | 0.0234115 ±0.0003034   | 0.9739 | EXP 149 of 150         | 0.2311331 ±0.0065437   | 0.1672 | EXP 150 of 150         | 2.5498413 ±0.0066392   | 0.9411 | EXP 150 of 150         | 214.02599 ±0.01914     | 0.9999 | EXP 150 of 150         | 771.31832 ±0.03966     |
| 20F04691            | 17.0 % | 0.0362784 ±0.0003373   | 0.9735 | EXP 149 of 150         | 0.2692688 ±0.0059898   | 0.1547 | EXP 150 of 150         | 3.0795375 ±0.0072532   | 0.9496 | EXP 150 of 150         | 259.88544 ±0.01965     | 0.9999 | EXP 150 of 150         | 940.30857 ±0.03898     |
| 20F04693            | 17.0 % | 0.0159777 ±0.0002943   | 0.9681 | EXP 149 of 150         | 0.1215473 ±0.0056022   | 0.0689 | EXP 149 of 150         | 1.8156550 ±0.0060403   | 0.9073 | EXP 149 of 150         | 152.24279 ±0.01547     | 0.9999 | EXP 150 of 150         | 549.24263 ±0.03545     |
| 20F04694            | 17.0 % | 0.1508301 ±0.0006471   | 0.8452 | EXP 150 of 150         | 0.3871417 ±0.0057304   | 0.3286 | EXP 150 of 150         | 4.5270071 ±0.0073797   | 0.9751 | EXP 150 of 150         | 380.38675 ±0.02353     | 1.0000 | EXP 149 of 150         | 1407.25775 ±0.05259    |
| 20F04696            | 17.0 % | 0.1057808 ±0.0004891   | 0.9040 | EXP 150 of 150         | 0.2302706 ±0.0058184   | 0.1371 | EXP 150 of 150         | 3.5411334 ±0.0068276   | 0.9653 | EXP 149 of 150         | 296.87342 ±0.02169     | 1.0000 | EXP 150 of 150         | 1094.44525 ±0.04913    |
| 20F04697            | 17.0 % | 0.0335991 ±0.0003577   | 0.9656 | EXP 149 of 150         | 0.2321809 ±0.0062926   | 0.1447 | EXP 150 of 150         | 2.5904099 ±0.0068365   | 0.9374 | EXP 149 of 150         | 216.74408 ±0.01978     | 0.9999 | EXP 150 of 150         | 784.79078 ±0.03995     |
| 20F04699            | 17.0 % | 0.0503318 ±0.0003920   | 0.9643 | EXP 150 of 150         | 0.4059169 ±0.0059010   | 0.3514 | EXP 150 of 150         | 3.6451186 ±0.0067589   | 0.9695 | EXP 150 of 150         | 304.83211 ±0.02272     | 0.9999 | EXP 150 of 150         | 1107.71026 ±0.05158    |
| 20F04700            | 17.0 % | 0.0180028 ±0.0002850   | 0.9760 | EXP 149 of 150         | 0.1738678 ±0.0057861   | 0.0418 | EXP 148 of 150         | 1.9842931 ±0.0067376   | 0.9026 | EXP 150 of 150         | 168.00926 ±0.01651     | 0.9999 | EXP 150 of 150         | 605.24780 ±0.03776     |
| 20F04702            | 17.0 % | 0.0193494 ±0.0003234   | 0.9746 | EXP 150 of 150         | 0.2882966 ±0.0053809   | 0.2602 | EXP 149 of 150         | 2.8296447 ±0.0069195   | 0.9479 | EXP 148 of 150         | 237.66038 ±0.01925     | 0.9999 | EXP 150 of 150         | 854.90162 ±0.04102     |
| 20F04703            | 17.0 % | 0.0479647 ±0.0004222   | 0.9611 | EXP 149 of 150         | 0.2946880 ±0.0056540   | 0.1947 | EXP 149 of 150         | 3.6084766 ±0.0062436   | 0.9730 | EXP 150 of 150         | 301.44588 ±0.02293     | 0.9999 | EXP 150 of 150         | 1094.37162 ±0.04540    |
| 20F04705            | 17.0 % | 0.1017235 ±0.0005153   | 0.5904 | EXP 150 of 150         | 0.1326128 ±0.0061780   | 0.0318 | EXP 150 of 150         | 1.5387272 ±0.0071202   | 0.8341 | EXP 150 of 150         | 128.81128 ±0.01551     | 0.9999 | EXP 150 of 150         | 491.78767 ±0.03199     |
| 20F04706            | 17.0 % | 0.0533874 ±0.0003688   | 0.9704 | EXP 148 of 150         | 0.2898855 ±0.0053769   | 0.2912 | EXP 150 of 150         | 3.6003904 ±0.0070957   | 0.9641 | EXP 150 of 150         | 301.26732 ±0.02104     | 1.0000 | EXP 150 of 150         | 1094.49710 ±0.04443    |
| 20F04708            | 17.0 % | 1.0409329 ±0.0015931   | 0.9688 | EXP 150 of 150         | 0.1768092 ±0.0055660   | 0.1271 | EXP 148 of 150         | 2.2094798 ±0.0068223   | 0.9161 | EXP 150 of 150         | 170.40115 ±0.01730     | 0.9999 | EXP 150 of 150         | 963.05774 ±0.04425     |
| 20F04709            | 17.0 % | 0.0668178 ±0.0004956   | 0.9468 | EXP 150 of 150         | 0.3312108 ±0.0063858   | 0.3013 | EXP 150 of 150         | 3.7732760 ±0.0069425   | 0.9705 | EXP 150 of 150         | 313.90462 ±0.02362     | 0.9999 | EXP 150 of 150         | 1143.91126 ±0.04801    |
| 20F04711            | 17.0 % | 0.0421799 ±0.0004224   | 0.9694 | EXP 149 of 150         | 0.3807934 ±0.0059878   | 0.3648 | EXP 150 of 150         | 4.0765664 ±0.0065471   | 0.9758 | EXP 149 of 150         | 340.72735 ±0.02351     | 1.0000 | EXP 150 of 150         | 1230.63158 ±0.05151    |
| 20F04712            | 17.0 % | 0.0255205 ±0.0003428   | 0.9576 | EXP 150 of 150         | 0.1413388 ±0.0060790   | 0.0904 | EXP 150 of 150         | 1.7863266 ±0.0068875   | 0.8752 | EXP 150 of 150         | 150.71208 ±0.01648     | 0.9999 | EXP 150 of 150         | 546.44153 ±0.03303     |
| 20F04714            | 17.0 % | 0.0202243 ±0.0002917   | 0.9746 | EXP 149 of 150         | 0.2053353 ±0.0060902   | 0.1764 | EXP 149 of 150         | 2.2204820 ±0.0074596   | 0.9058 | EXP 148 of 150         | 186.34772 ±0.01896     | 0.9999 | EXP 147 of 150         | 671.32977 ±0.04007     |
| 20F04715            | 17.0 % | 0.0208225 ±0.0002901   | 0.9583 | EXP 150 of 150         | 0.1119936 ±0.0059672   | 0.0097 | EXP 150 of 150         | 1.3714313 ±0.0064190   | 0.8277 | EXP 146 of 150         | 117.43519 ±0.01406     | 0.9999 | EXP 149 of 150         | 425.91603 ±0.03222     |
| 20F04717            | 17.0 % | 0.0147708 ±0.0002780   | 0.9863 | EXP 150 of 150         | 0.2643965 ±0.0058795   | 0.1829 | EXP 148 of 150         | 3.3424893 ±0.0071325   | 0.9569 | EXP 147 of 150         | 280.77728 ±0.01835     | 1.0000 | EXP 148 of 150         | 1012.76792 ±0.04456    |
| 20F04718            | 17.0 % | 0.4464397 ±0.0009521   | 0.8967 | EXP 149 of 150         | 0.1595923 ±0.0057333   | 0.1089 | EXP 150 of 150         | 2.2034129 ±0.0064620   | 0.9249 | EXP 149 of 150         | 179.34071 ±0.01575     | 0.9999 | EXP 150 of 150         | 782.04012 ±0.03836     |

| r2     | Regression<br>(type,n) |            |
|--------|------------------------|------------|
| 1.0000 | EXP                    | 148 of 150 |
| 1.0000 | EXP                    | 150 of 150 |
| 1.0000 | EXP                    | 146 of 150 |
| 1.0000 | EXP                    | 150 of 150 |
| 1.0000 | EXP                    | 150 of 150 |
| 0.9999 | EXP                    | 150 of 150 |
| 1.0000 | EXP                    | 150 of 150 |
| 1.0000 | EXP                    | 150 of 150 |
| 1.0000 | EXP                    | 150 of 150 |
| 1.0000 | EXP                    | 150 of 150 |
| 1.0000 | EXP                    | 148 of 150 |
| 1.0000 | EXP                    | 149 of 150 |
| 1.0000 | EXP                    | 149 of 150 |
| 1.0000 | EXP                    | 150 of 150 |
| 1.0000 | EXP                    | 150 of 150 |
| 1.0000 | EXP                    | 149 of 150 |
| 1.0000 | EXP                    | 149 of 150 |
| 1.0000 | EXP                    | 150 of 150 |
| 1.0000 | EXP                    | 150 of 150 |
| 1.0000 | EXP                    | 149 of 150 |
| 1.0000 | EXP                    | 150 of 150 |
| 1.0000 | EXP                    | 150 of 150 |
| 1.0000 | EXP                    | 149 of 150 |
| 1.0000 | EXP                    | 150 of 150 |
| 0.9999 | EXP                    | 150 of 150 |
| 1.0000 | EXP                    | 150 of 150 |
| 1.0000 | EXP                    | 148 of 150 |

| Project Info |        | Analyst     | Irradiation | X-pos | Y-pos | Z/H-pos | Project                | Experiment | Nmb |
|--------------|--------|-------------|-------------|-------|-------|---------|------------------------|------------|-----|
| 20F04675     | 17.0 % | Dan Miggins | 19-OSU-02   | 0.00  | 0.00  | 50.98   | Oregon\Swenton (18-58) | 20F04671   | 01  |
| 20F04676     | 17.0 % | Dan Miggins | 19-OSU-02   | 0.00  | 0.00  | 50.98   | Oregon\Swenton (18-58) | 20F04671   | 01  |
| 20F04678     | 17.0 % | Dan Miggins | 19-OSU-02   | 0.00  | 0.00  | 50.98   | Oregon\Swenton (18-58) | 20F04671   | 01  |
| 20F04679     | 17.0 % | Dan Miggins | 19-OSU-02   | 0.00  | 0.00  | 50.98   | Oregon\Swenton (18-58) | 20F04671   | 01  |
| 20F04681     | 17.0 % | Dan Miggins | 19-OSU-02   | 0.00  | 0.00  | 50.98   | Oregon\Swenton (18-58) | 20F04671   | 01  |
| 20F04682     | 17.0 % | Dan Miggins | 19-OSU-02   | 0.00  | 0.00  | 50.98   | Oregon\Swenton (18-58) | 20F04671   | 01  |
| 20F04684     | 17.0 % | Dan Miggins | 19-OSU-02   | 0.00  | 0.00  | 50.98   | Oregon\Swenton (18-58) | 20F04671   | 01  |
| 20F04685     | 17.0 % | Dan Miggins | 19-OSU-02   | 0.00  | 0.00  | 50.98   | Oregon\Swenton (18-58) | 20F04671   | 01  |
| 20F04687     | 17.0 % | Dan Miggins | 19-OSU-02   | 0.00  | 0.00  | 50.98   | Oregon\Swenton (18-58) | 20F04671   | 01  |
| 20F04688     | 17.0 % | Dan Miggins | 19-OSU-02   | 0.00  | 0.00  | 50.98   | Oregon\Swenton (18-58) | 20F04671   | 01  |
| 20F04690     | 17.0 % | Dan Miggins | 19-OSU-02   | 0.00  | 0.00  | 50.98   | Oregon\Swenton (18-58) | 20F04671   | 01  |
| 20F04691     | 17.0 % | Dan Miggins | 19-OSU-02   | 0.00  | 0.00  | 50.98   | Oregon\Swenton (18-58) | 20F04671   | 01  |
| 20F04693     | 17.0 % | Dan Miggins | 19-OSU-02   | 0.00  | 0.00  | 50.98   | Oregon\Swenton (18-58) | 20F04671   | 01  |
| 20F04694     | 17.0 % | Dan Miggins | 19-OSU-02   | 0.00  | 0.00  | 50.98   | Oregon\Swenton (18-58) | 20F04671   | 01  |
| 20F04696     | 17.0 % | Dan Miggins | 19-OSU-02   | 0.00  | 0.00  | 50.98   | Oregon\Swenton (18-58) | 20F04671   | 01  |
| 20F04697     | 17.0 % | Dan Miggins | 19-OSU-02   | 0.00  | 0.00  | 50.98   | Oregon\Swenton (18-58) | 20F04671   | 01  |
| 20F04699     | 17.0 % | Dan Miggins | 19-OSU-02   | 0.00  | 0.00  | 50.98   | Oregon\Swenton (18-58) | 20F04671   | 01  |
| 20F04700     | 17.0 % | Dan Miggins | 19-OSU-02   | 0.00  | 0.00  | 50.98   | Oregon\Swenton (18-58) | 20F04671   | 01  |
| 20F04702     | 17.0 % | Dan Miggins | 19-OSU-02   | 0.00  | 0.00  | 50.98   | Oregon\Swenton (18-58) | 20F04671   | 01  |
| 20F04703     | 17.0 % | Dan Miggins | 19-OSU-02   | 0.00  | 0.00  | 50.98   | Oregon\Swenton (18-58) | 20F04671   | 01  |
| 20F04705     | 17.0 % | Dan Miggins | 19-OSU-02   | 0.00  | 0.00  | 50.98   | Oregon\Swenton (18-58) | 20F04671   | 01  |
| 20F04706     | 17.0 % | Dan Miggins | 19-OSU-02   | 0.00  | 0.00  | 50.98   | Oregon\Swenton (18-58) | 20F04671   | 01  |
| 20F04708     | 17.0 % | Dan Miggins | 19-OSU-02   | 0.00  | 0.00  | 50.98   | Oregon\Swenton (18-58) | 20F04671   | 01  |
| 20F04709     | 17.0 % | Dan Miggins | 19-OSU-02   | 0.00  | 0.00  | 50.98   | Oregon\Swenton (18-58) | 20F04671   | 01  |
| 20F04711     | 17.0 % | Dan Miggins | 19-OSU-02   | 0.00  | 0.00  | 50.98   | Oregon\Swenton (18-58) | 20F04671   | 01  |
| 20F04712     | 17.0 % | Dan Miggins | 19-OSU-02   | 0.00  | 0.00  | 50.98   | Oregon\Swenton (18-58) | 20F04671   | 01  |
| 20F04714     | 17.0 % | Dan Miggins | 19-OSU-02   | 0.00  | 0.00  | 50.98   | Oregon\Swenton (18-58) | 20F04671   | 01  |
| 20F04715     | 17.0 % | Dan Miggins | 19-OSU-02   | 0.00  | 0.00  | 50.98   | Oregon\Swenton (18-58) | 20F04671   | 01  |
| 20F04717     | 17.0 % | Dan Miggins | 19-OSU-02   | 0.00  | 0.00  | 50.98   | Oregon\Swenton (18-58) | 20F04671   | 01  |
| 20F04718     | 17.0 % | Dan Miggins | 19-OSU-02   | 0.00  | 0.00  | 50.98   | Oregon\Swenton (18-58) | 20F04671   | 01  |

| Sample Parameters |        | Sample   | Material | Location          | Standard Name    | Standard (in Ma) | %1σ   | Standard Reference  | Standard 40Ar/39Ar | %1σ   | J          | %1σ   | Air 40Ar/36Ar | %1σ   | MDF (lin) | %1σ   | Volume Ratio | Sensitivity (mol/volt) | Day | Month | Year | Hour | Min | Resist |
|-------------------|--------|----------|----------|-------------------|------------------|------------------|-------|---------------------|--------------------|-------|------------|-------|---------------|-------|-----------|-------|--------------|------------------------|-----|-------|------|------|-----|--------|
| 20F04675          | 17.0 % | VS17-054 | Sanidine | Unidentified flow | FCT-NM (2C41-19) | 28.201           | 0.082 | Kuiper et al (2008) | 9.91958            | 0.137 | 0.00156514 | 0.137 | 299.519       | 0.131 | 0.9991985 | 0.042 | 1            | 3.54E-14               | 1   | APR   | 2020 | 22   | 34  | 1      |
| 20F04676          | 17.0 % | VS17-054 | Sanidine | Unidentified flow | FCT-NM (2C41-19) | 28.201           | 0.082 | Kuiper et al (2008) | 9.91958            | 0.137 | 0.00156514 | 0.137 | 299.519       | 0.131 | 0.9991985 | 0.042 | 1            | 3.54E-14               | 1   | APR   | 2020 | 22   | 43  | 1      |
| 20F04678          | 17.0 % | VS17-054 | Sanidine | Unidentified flow | FCT-NM (2C41-19) | 28.201           | 0.082 | Kuiper et al (2008) | 9.91958            | 0.137 | 0.00156514 | 0.137 | 299.519       | 0.131 | 0.9991985 | 0.042 | 1            | 3.54E-14               | 1   | APR   | 2020 | 23   | 0   | 1      |
| 20F04679          | 17.0 % | VS17-054 | Sanidine | Unidentified flow | FCT-NM (2C41-19) | 28.201           | 0.082 | Kuiper et al (2008) | 9.91958            | 0.137 | 0.00156514 | 0.137 | 299.519       | 0.131 | 0.9991985 | 0.042 | 1            | 3.54E-14               | 1   | APR   | 2020 | 23   | 8   | 1      |
| 20F04681          | 17.0 % | VS17-054 | Sanidine | Unidentified flow | FCT-NM (2C41-19) | 28.201           | 0.082 | Kuiper et al (2008) | 9.91958            | 0.137 | 0.00156514 | 0.137 | 299.519       | 0.131 | 0.9991985 | 0.042 | 1            | 3.54E-14               | 1   | APR   | 2020 | 23   | 25  | 1      |
| 20F04682          | 17.0 % | VS17-054 | Sanidine | Unidentified flow | FCT-NM (2C41-19) | 28.201           | 0.082 | Kuiper et al (2008) | 9.91958            | 0.137 | 0.00156514 | 0.137 | 299.519       | 0.131 | 0.9991985 | 0.042 | 1            | 3.54E-14               | 1   | APR   | 2020 | 23   | 34  | 1      |
| 20F04684          | 17.0 % | VS17-054 | Sanidine | Unidentified flow | FCT-NM (2C41-19) | 28.201           | 0.082 | Kuiper et al (2008) | 9.91958            | 0.137 | 0.00156514 | 0.137 | 299.519       | 0.131 | 0.9991985 | 0.042 | 1            | 3.54E-14               | 1   | APR   | 2020 | 23   | 51  | 1      |
| 20F04685          | 17.0 % | VS17-054 | Sanidine | Unidentified flow | FCT-NM (2C41-19) | 28.201           | 0.082 | Kuiper et al (2008) | 9.91958            | 0.137 | 0.00156514 | 0.137 | 299.519       | 0.131 | 0.9991985 | 0.042 | 1            | 3.54E-14               | 2   | APR   | 2020 | 0    | 0   | 1      |
| 20F04687          | 17.0 % | VS17-054 | Sanidine | Unidentified flow | FCT-NM (2C41-19) | 28.201           | 0.082 | Kuiper et al (2008) | 9.91958            | 0.137 | 0.00156514 | 0.137 | 299.519       | 0.131 | 0.9991985 | 0.042 | 1            | 3.54E-14               | 2   | APR   | 2020 | 0    | 17  | 1      |
| 20F04688          | 17.0 % | VS17-054 | Sanidine | Unidentified flow | FCT-NM (2C41-19) | 28.201           | 0.082 | Kuiper et al (2008) | 9.91958            | 0.137 | 0.00156514 | 0.137 | 299.519       | 0.131 | 0.9991985 | 0.042 | 1            | 3.54E-14               | 2   | APR   | 2020 | 0    | 25  | 1      |
| 20F04690          | 17.0 % | VS17-054 | Sanidine | Unidentified flow | FCT-NM (2C41-19) | 28.201           | 0.082 | Kuiper et al (2008) | 9.91958            | 0.137 | 0.00156514 | 0.137 | 299.519       | 0.131 | 0.9991985 | 0.042 | 1            | 3.54E-14               | 2   | APR   | 2020 | 0    | 42  | 1      |
| 20F04691          | 17.0 % | VS17-054 | Sanidine | Unidentified flow | FCT-NM (2C41-19) | 28.201           | 0.082 | Kuiper et al (2008) | 9.91958            | 0.137 | 0.00156514 | 0.137 | 299.519       | 0.131 | 0.9991985 | 0.042 | 1            | 3.54E-14               | 2   | APR   | 2020 | 0    | 51  | 1      |
| 20F04693          | 17.0 % | VS17-054 | Sanidine | Unidentified flow | FCT-NM (2C41-19) | 28.201           | 0.082 | Kuiper et al (2008) | 9.91958            | 0.137 | 0.00156514 | 0.137 | 299.519       | 0.131 | 0.9991985 | 0.042 | 1            | 3.54E-14               | 2   | APR   | 2020 | 1    | 8   | 1      |
| 20F04694          | 17.0 % | VS17-054 | Sanidine | Unidentified flow | FCT-NM (2C41-19) | 28.201           | 0.082 | Kuiper et al (2008) | 9.91958            | 0.137 | 0.00156514 | 0.137 | 299.519       | 0.131 | 0.9991985 | 0.042 | 1            | 3.54E-14               | 2   | APR   | 2020 | 1    | 17  | 1      |
| 20F04696          | 17.0 % | VS17-054 | Sanidine | Unidentified flow | FCT-NM (2C41-19) | 28.201           | 0.082 | Kuiper et al (2008) | 9.91958            | 0.137 | 0.00156514 | 0.137 | 299.519       | 0.131 | 0.9991985 | 0.042 | 1            | 3.54E-14               | 2   | APR   | 2020 | 1    | 34  | 1      |
| 20F04697          | 17.0 % | VS17-054 | Sanidine | Unidentified flow | FCT-NM (2C41-19) | 28.201           | 0.082 | Kuiper et al (2008) | 9.91958            | 0.137 | 0.00156514 | 0.137 | 299.519       | 0.131 | 0.9991985 | 0.042 | 1            | 3.54E-14               | 2   | APR   | 2020 | 1    | 42  | 1      |
| 20F04699          | 17.0 % | VS17-054 | Sanidine | Unidentified flow | FCT-NM (2C41-19) | 28.201           | 0.082 | Kuiper et al (2008) | 9.91958            | 0.137 | 0.00156514 | 0.137 | 299.519       | 0.131 | 0.9991985 | 0.042 | 1            | 3.54E-14               | 2   | APR   | 2020 | 1    | 59  | 1      |
| 20F04700          | 17.0 % | VS17-054 | Sanidine | Unidentified flow | FCT-NM (2C41-19) | 28.201           | 0.082 | Kuiper et al (2008) | 9.91958            | 0.137 | 0.00156514 | 0.137 | 299.519       | 0.131 | 0.9991985 | 0.042 | 1            | 3.54E-14               | 2   | APR   | 2020 | 2    | 8   | 1      |
| 20F04702          | 17.0 % | VS17-054 | Sanidine | Unidentified flow | FCT-NM (2C41-19) | 28.201           | 0.082 | Kuiper et al (2008) | 9.91958            | 0.137 | 0.00156514 | 0.137 | 299.519       | 0.131 | 0.9991985 | 0.042 | 1            | 3.54E-14               | 2   | APR   | 2020 | 2    | 25  | 1      |
| 20F04703          | 17.0 % | VS17-054 | Sanidine | Unidentified flow | FCT-NM (2C41-19) | 28.201           | 0.082 | Kuiper et al (2008) | 9.91958            | 0.137 | 0.00156514 | 0.137 | 299.519       | 0.131 | 0.9991985 | 0.042 | 1            | 3.54E-14               | 2   | APR   | 2020 | 2    | 34  | 1      |
| 20F04705          | 17.0 % | VS17-054 | Sanidine | Unidentified flow | FCT-NM (2C41-19) | 28.201           | 0.082 | Kuiper et al (2008) | 9.91958            | 0.137 | 0.00156514 | 0.137 | 299.519       | 0.131 | 0.9991985 | 0.042 | 1            | 3.54E-14               | 2   | APR   | 2020 | 2    | 51  | 1      |
| 20F04706          | 17.0 % | VS17-054 | Sanidine | Unidentified flow | FCT-NM (2C41-19) | 28.201           | 0.082 | Kuiper et al (2008) | 9.91958            | 0.137 | 0.00156514 | 0.137 | 299.519       | 0.131 | 0.9991985 | 0.042 | 1            | 3.54E-14               | 2   | APR   | 2020 | 2    | 59  | 1      |
| 20F04708          | 17.0 % | VS17-054 | Sanidine | Unidentified flow | FCT-NM (2C41-19) | 28.201           | 0.082 | Kuiper et al (2008) | 9.91958            | 0.137 | 0.00156514 | 0.137 | 299.519       | 0.131 | 0.9991985 | 0.042 | 1            | 3.54E-14               | 2   | APR   | 2020 | 3    | 16  | 1      |
| 20F04709          | 17.0 % | VS17-054 | Sanidine | Unidentified flow | FCT-NM (2C41-19) | 28.201           | 0.082 | Kuiper et al (2008) | 9.91958            | 0.137 | 0.00156514 | 0.137 | 299.519       | 0.131 | 0.9991985 | 0.042 | 1            | 3.54E-14               | 2   | APR   | 2020 | 3    | 25  | 1      |
| 20F04711          | 17.0 % | VS17-054 | Sanidine | Unidentified flow | FCT-NM (2C41-19) | 28.201           | 0.082 | Kuiper et al (2008) | 9.91958            | 0.137 | 0.00156514 | 0.137 | 299.519       | 0.131 | 0.9991985 | 0.042 | 1            | 3.54E-14               | 2   | APR   | 2020 | 3    | 42  | 1      |
| 20F04712          | 17.0 % | VS17-054 | Sanidine | Unidentified flow | FCT-NM (2C41-19) | 28.201           | 0.082 | Kuiper et al (2008) | 9.91958            | 0.137 | 0.00156514 | 0.137 | 299.519       | 0.131 | 0.9991985 | 0.042 | 1            | 3.54E-14               | 2   | APR   | 2020 | 3    | 51  | 1      |
| 20F04714          | 17.0 % | VS17-054 | Sanidine | Unidentified flow | FCT-NM (2C41-19) | 28.201           | 0.082 | Kuiper et al (2008) | 9.91958            | 0.137 | 0.00156514 | 0.137 | 299.519       | 0.131 | 0.9991985 | 0.042 | 1            | 3.54E-14               | 2   | APR   | 2020 | 4    | 8   | 1      |
| 20F04715          | 17.0 % | VS17-054 | Sanidine | Unidentified flow | FCT-NM (2C41-19) | 28.201           | 0.082 | Kuiper et al (2008) | 9.91958            | 0.137 | 0.00156514 | 0.137 | 299.519       | 0.131 | 0.9991985 | 0.042 | 1            | 3.54E-14               | 2   | APR   | 2020 | 4    | 16  | 1      |
| 20F04717          | 17.0 % | VS17-054 | Sanidine | Unidentified flow | FCT-NM (2C41-19) | 28.201           | 0.082 | Kuiper et al (2008) | 9.91958            | 0.137 | 0.00156514 | 0.137 | 299.519       | 0.131 | 0.9991985 | 0.042 | 1            | 3.54E-14               | 2   | APR   | 2020 | 4    | 33  | 1      |
| 20F04718          | 17.0 % | VS17-054 | Sanidine | Unidentified flow | FCT-NM (2C41-19) | 28.201           | 0.082 | Kuiper et al (2008) | 9.91958            | 0.137 | 0.00156514 | 0.137 | 299.519       | 0.131 | 0.9991985 | 0.042 | 1            | 3.54E-14               | 2   | APR   | 2020 | 4    | 42  | 1      |



20F04671.AGE >>> VS17-054 >>> OREGON | SWENTON (18-58) PROJECT

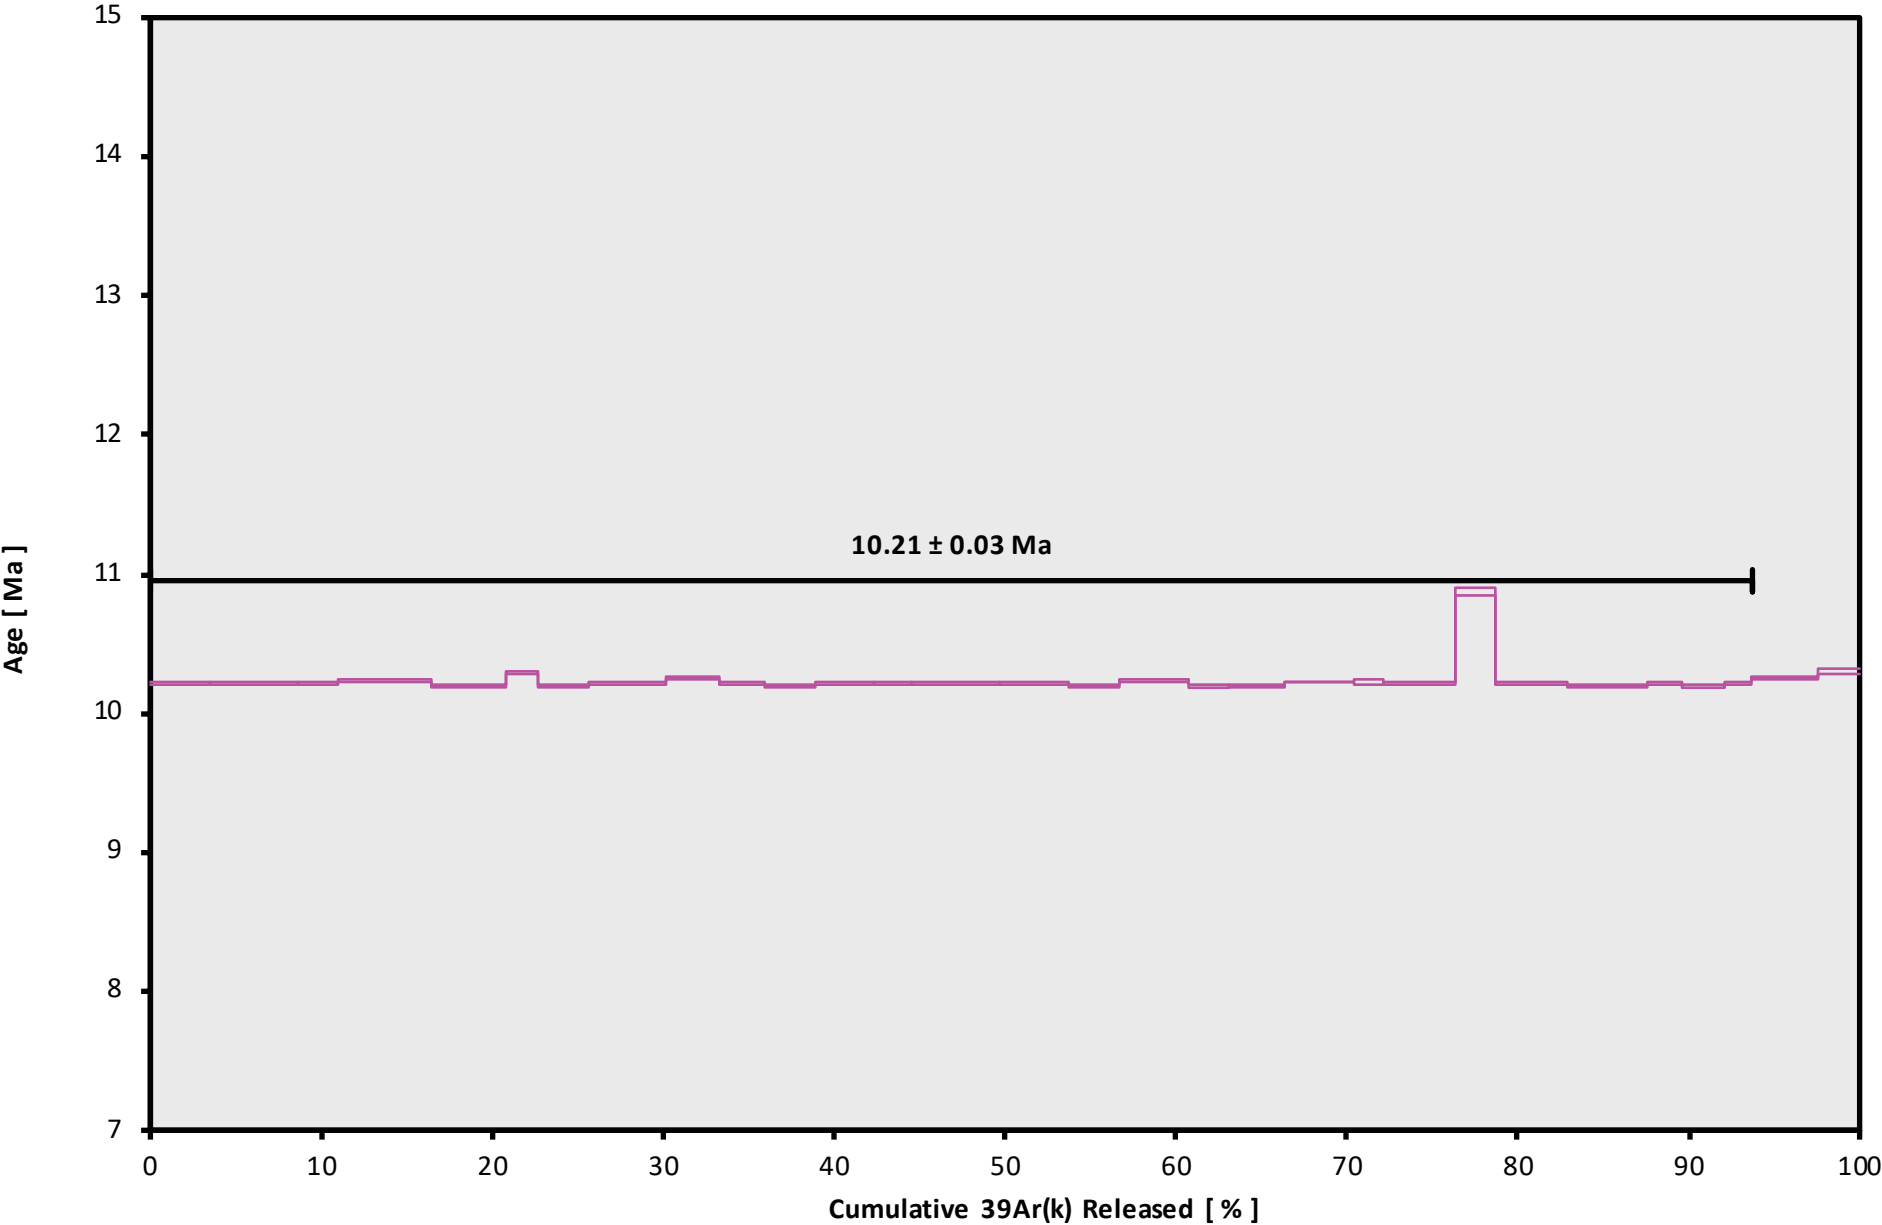

Ar-Ages in Ma

WEIGHTED PLATEAU

10.21 ± 0.03

TOTAL FUSION

10.23 ± 0.03

NORMAL ISOCHRON

10.20 ± 0.03

INVERSE ISOCHRON

10.20 ± 0.03

MSWD (PROBABILITY)

6.02 (0%)

Sample Info

Sanidine

Unidentified flow

Dan Miggins

IRR = 19-OSU-02 (2C41-

20F04671.AGE >>> VS17-054 >>> OREGON | SWENTON (18-58) PROJECT

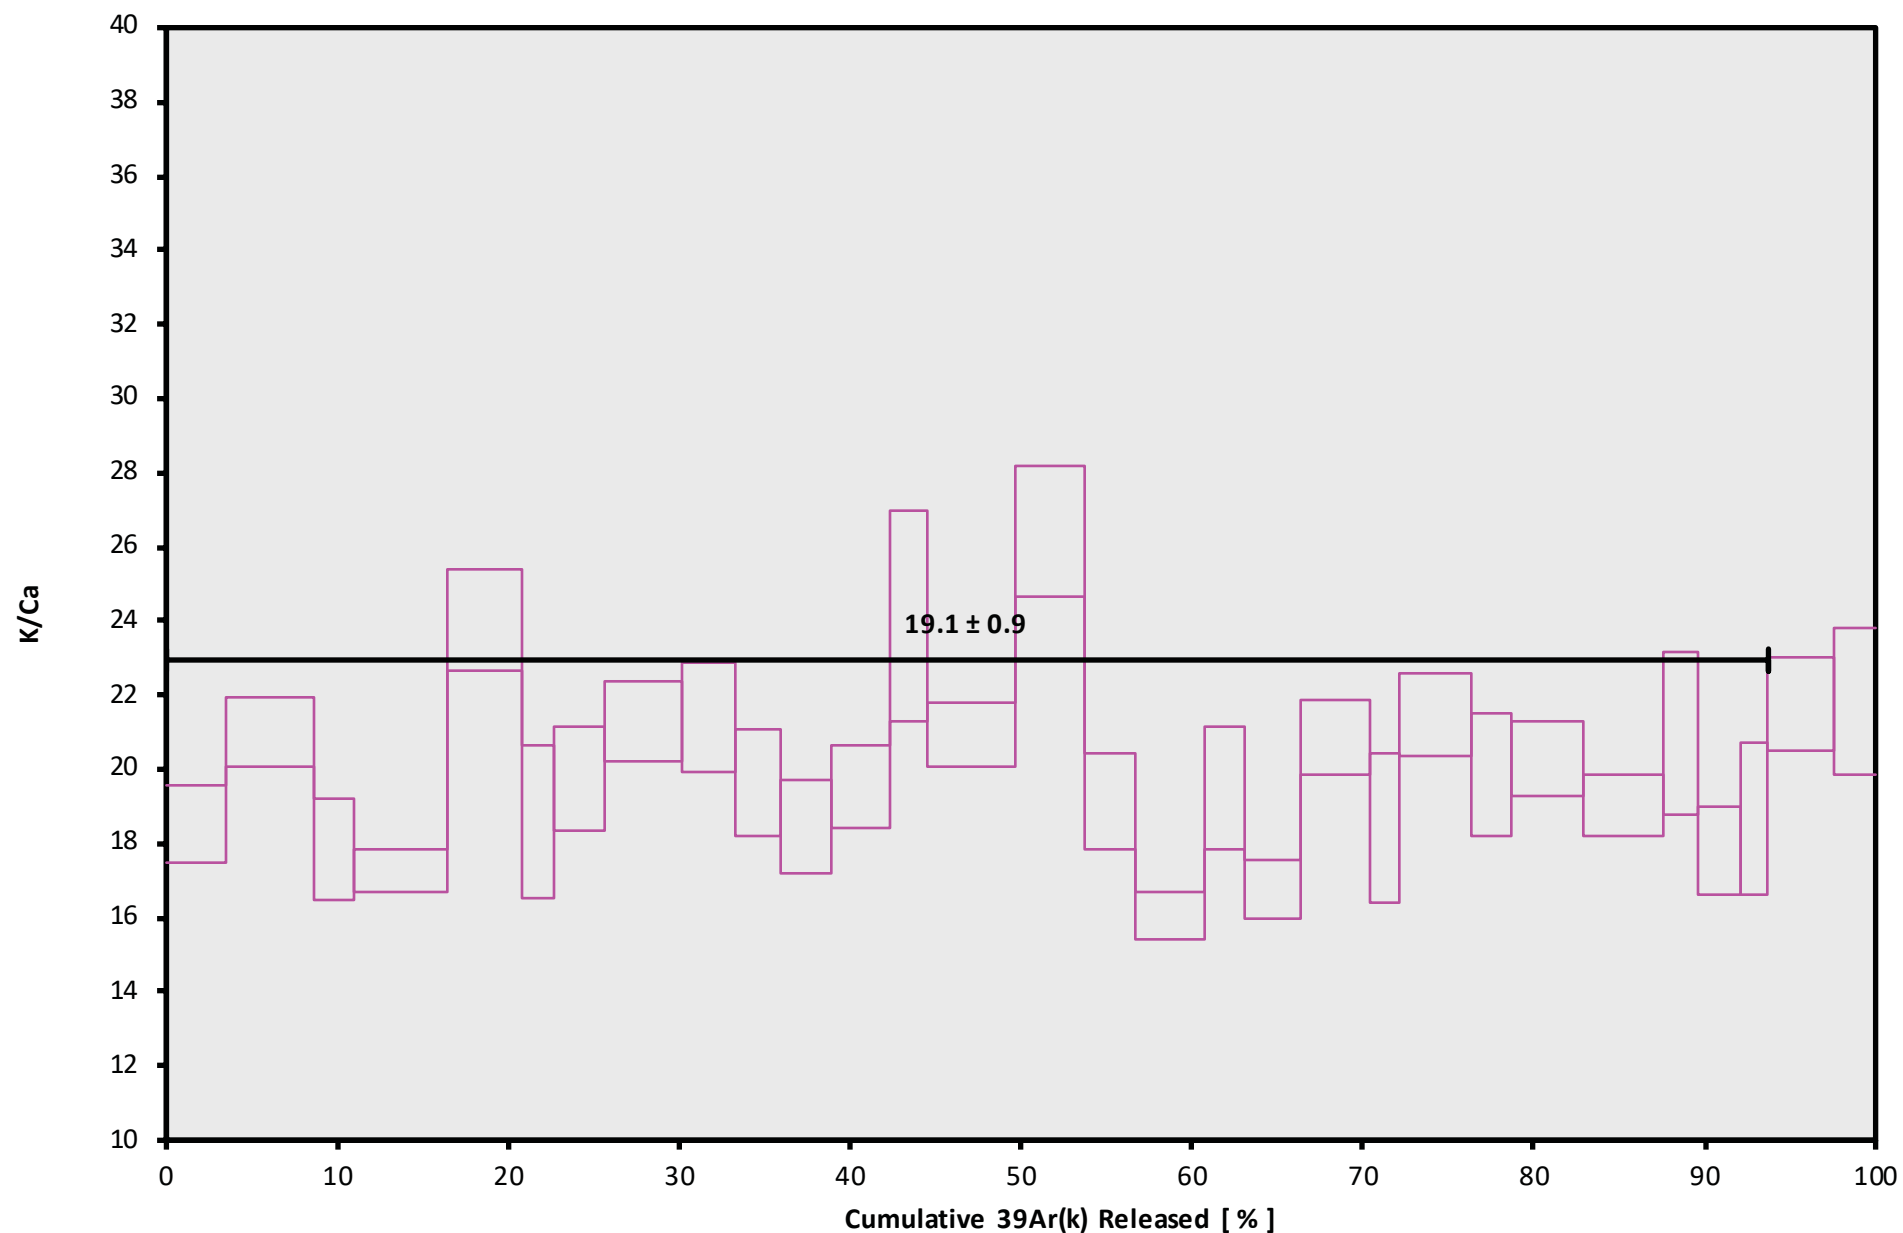

Ar-Ages in Ma

WEIGHTED PLATEAU

$10.21 \pm 0.03$

TOTAL FUSION

$10.23 \pm 0.03$

NORMAL ISOCHRON

$10.20 \pm 0.03$

INVERSE ISOCHRON

$10.20 \pm 0.03$

Sample Info

Sanidine

Unidentified flow

Dan Miggins

IRR = 19-OSU-02 (2C41-



20F04671.AGE >>> VS17-054 >>> OREGON | SWENTON (18-58) PROJECT

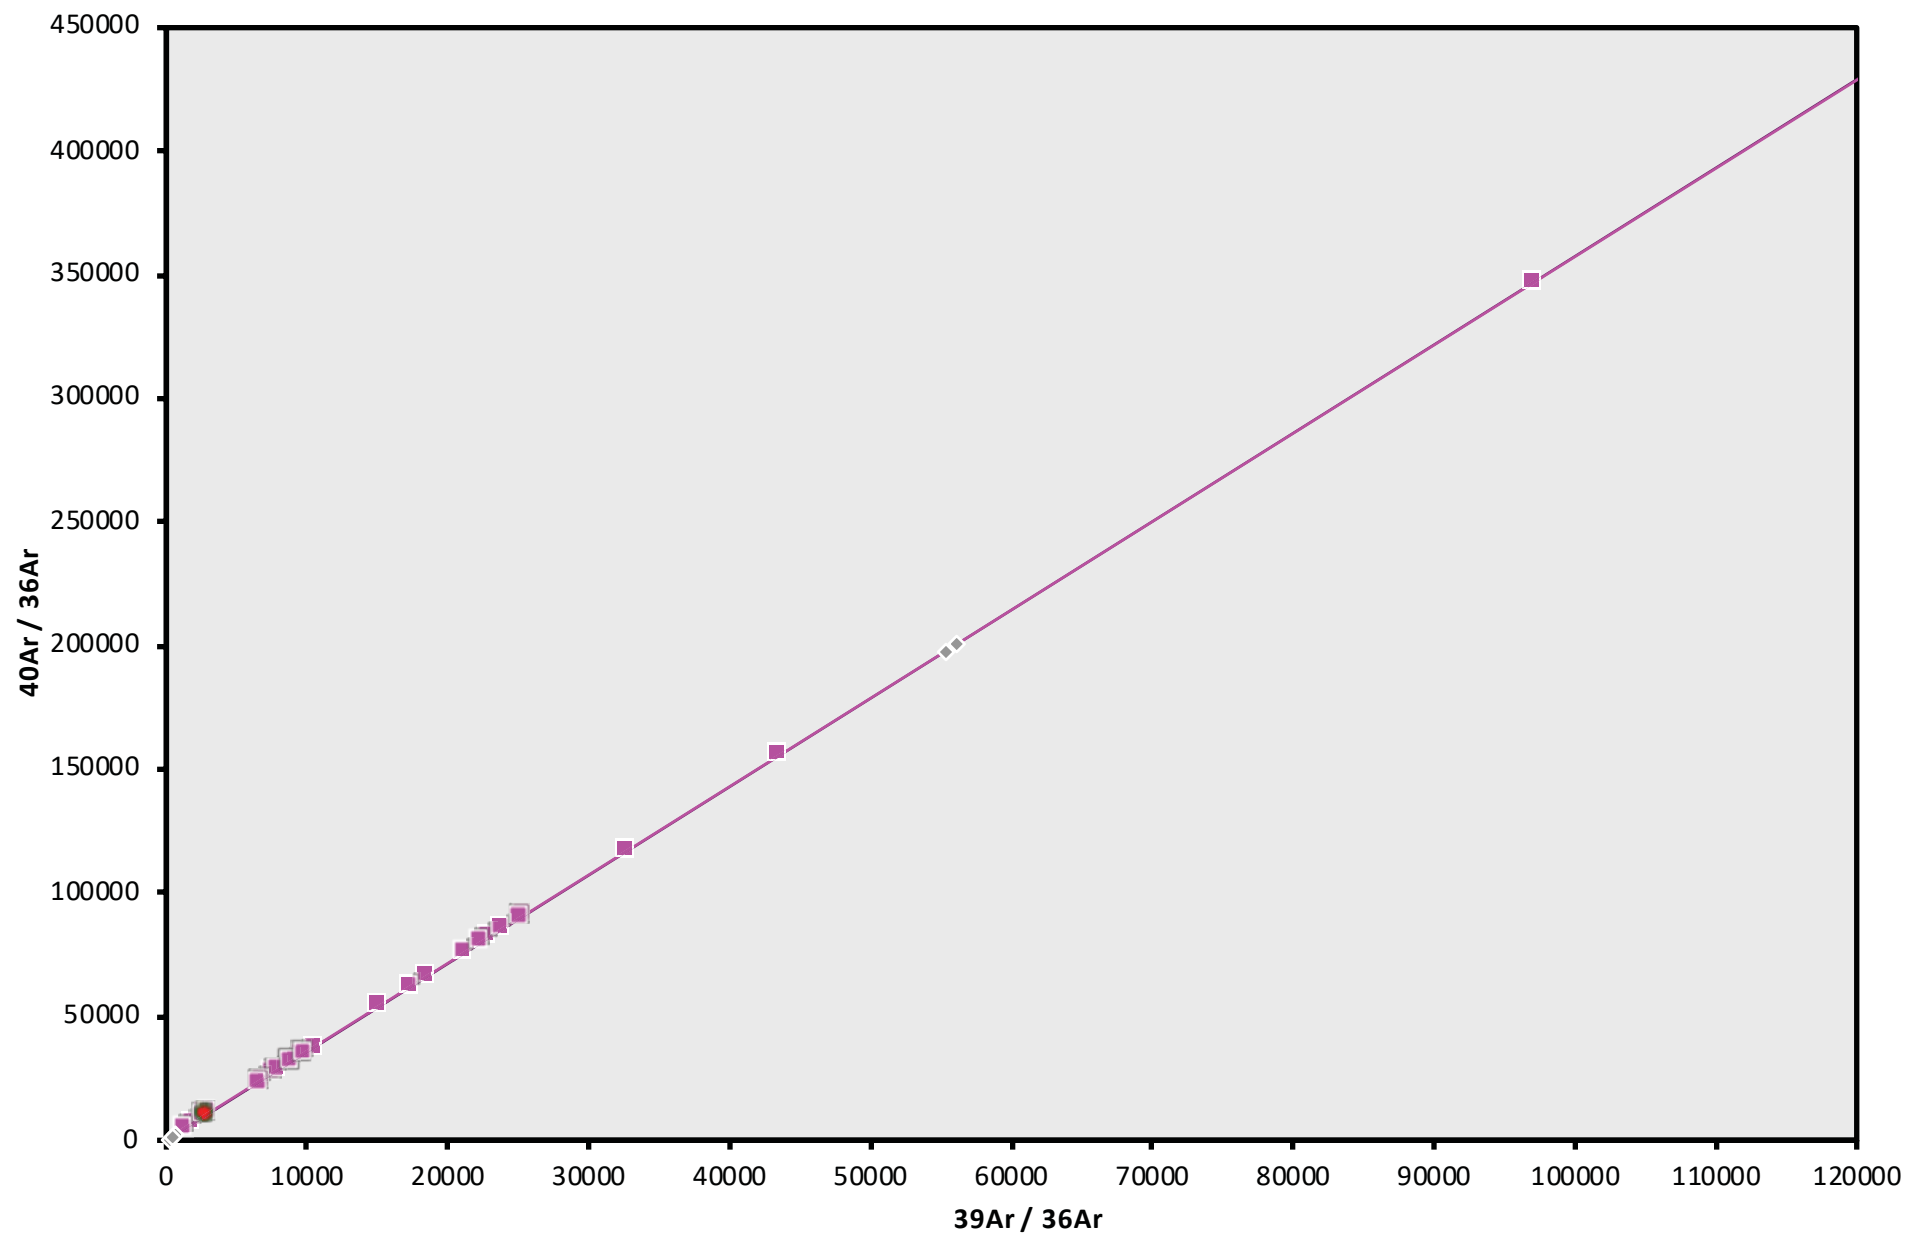

Ar-Ages in Ma

WEIGHTED PLATEAU

10.21 ± 0.03

TOTAL FUSION

10.23 ± 0.03

NORMAL ISOCHRON

10.20 ± 0.03

INVERSE ISOCHRON

10.20 ± 0.03

MSWD (PROBABILITY)

5.31 (0%)

40AR/36AR INTERCEPT

Sample Info

Sanidine

Unidentified flow

Dan Miggins

IRR = 19-OSU-02 (2C41-

20F04671.AGE >>> VS17-054 >>> OREGON | SWENTON (18-58) PROJECT

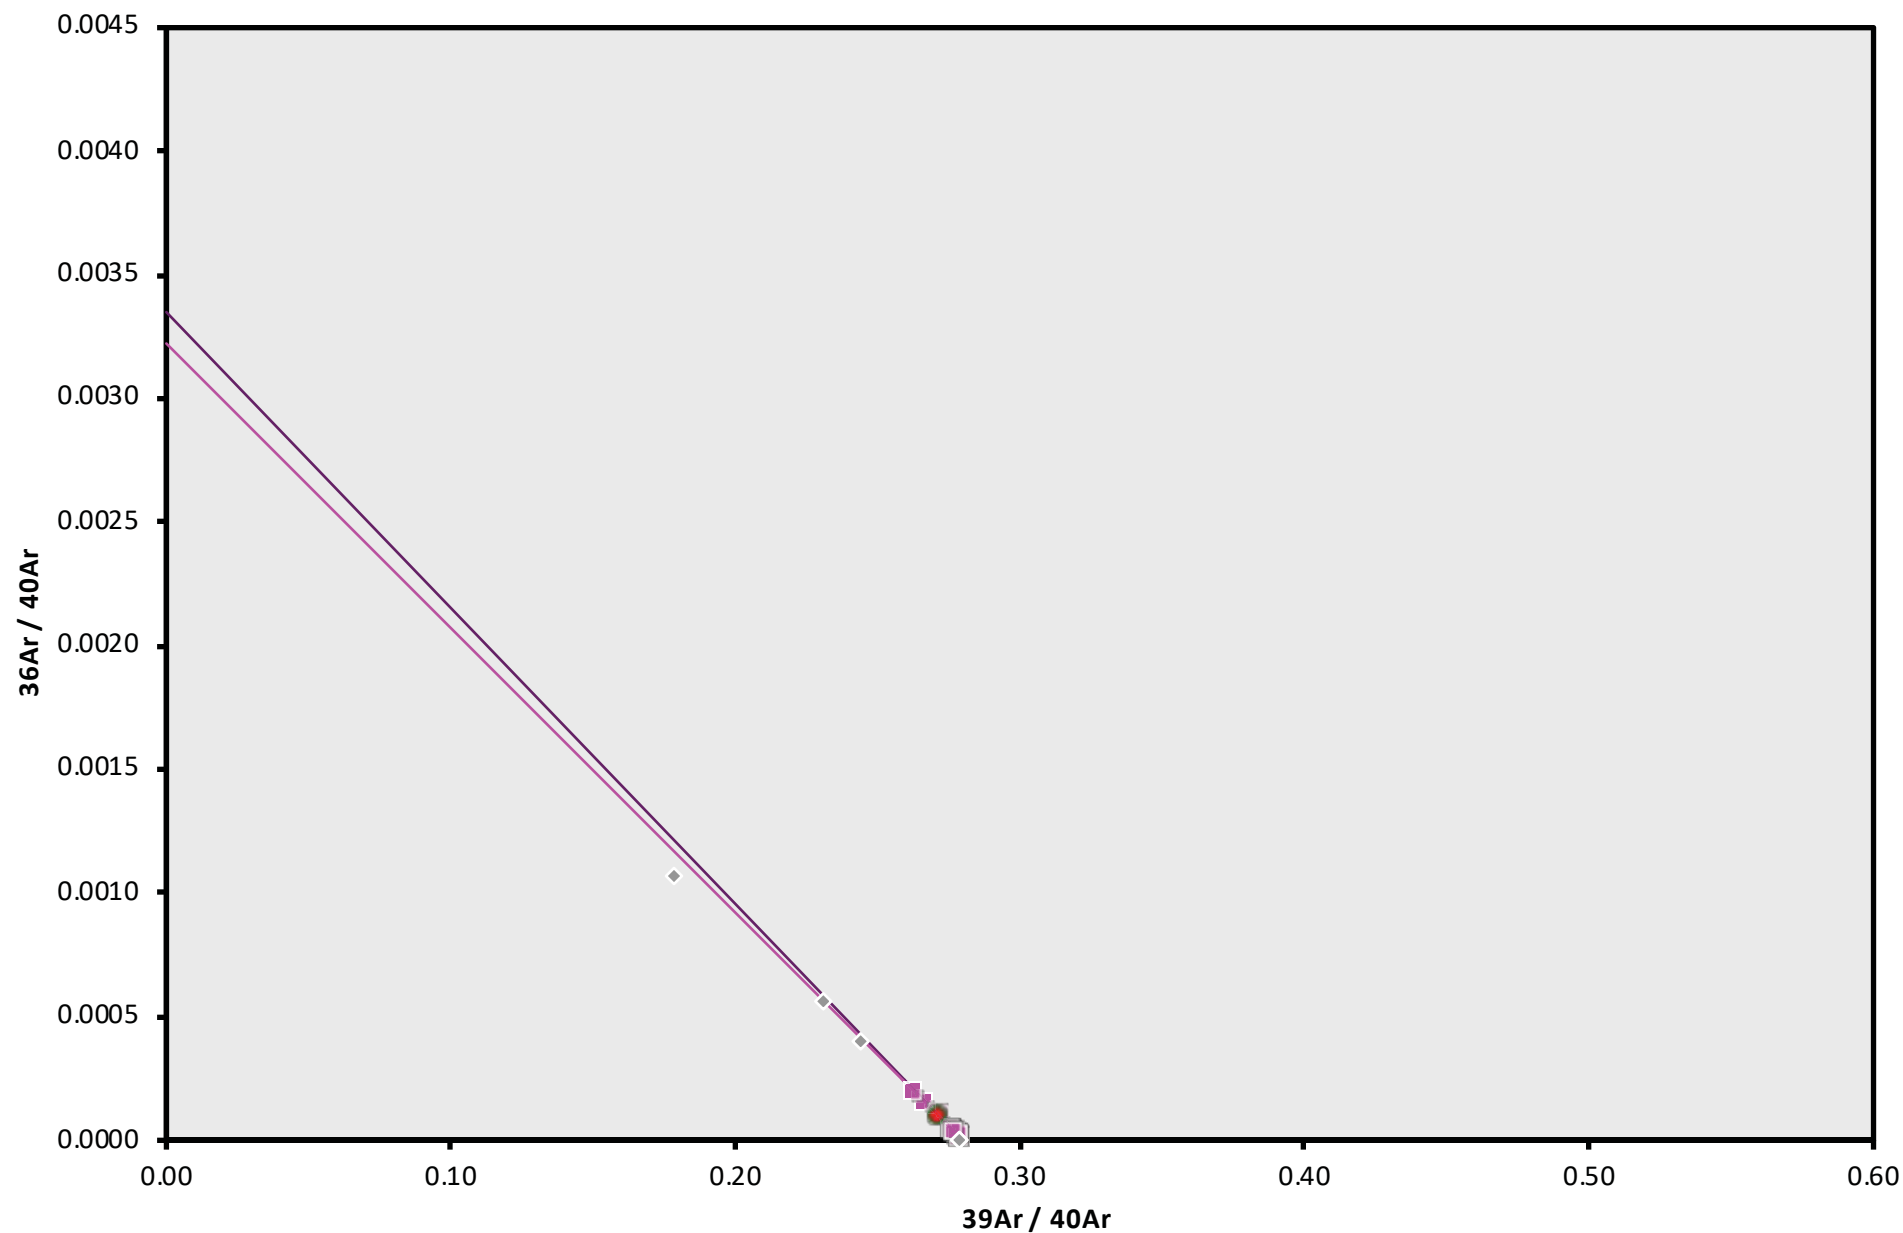

**Ar-Ages in Ma**

**WEIGHTED PLATEAU**  
 **$10.21 \pm 0.03$**

**TOTAL FUSION**  
 **$10.23 \pm 0.03$**

**NORMAL ISOCHRON**  
 **$10.20 \pm 0.03$**

**INVERSE ISOCHRON**  
 **$10.20 \pm 0.03$**

**MSWD (PROBABILITY)**  
**5.06 (0%)**

**SPREADING FACTOR**

**Sample Info**

Sanidine  
Unidentified flow  
Dan Miggins

**IRR = 19-OSU-02 (2C41-**

| Relative Abundances |        |   | 36Ar<br>[fA] | %1σ     | 37Ar<br>[fA] | %1σ    | 38Ar<br>[fA] | %1σ   | 39Ar<br>[fA] | %1σ   | 40Ar<br>[fA] | %1σ   | 40(r)/39(k) ± 2σ | Age ± 2σ<br>(Ma) | 40Ar(r)<br>(%) | 39Ar(k)<br>(%) | K/Ca ± 2σ   |
|---------------------|--------|---|--------------|---------|--------------|--------|--------------|-------|--------------|-------|--------------|-------|------------------|------------------|----------------|----------------|-------------|
| 20F04553            | 17.0 % | ✓ | 0.0046009    | 8.215   | 1.44391      | 10.887 | 5.12418      | 0.196 | 427.5475     | 0.041 | 1532.503     | 0.004 | 3.58066 ±0.00388 | 10.35 ±0.01      | 99.90          | 4.88           | 127.3 ±27.7 |
| 20F04554            | 17.0 % | ✓ | 0.0000649    | 641.196 | 1.34619      | 11.943 | 4.88268      | 0.185 | 405.8073     | 0.041 | 1453.981     | 0.004 | 3.58267 ±0.00304 | 10.36 ±0.01      | 99.99          | 4.63           | 129.6 ±31.0 |
| 20F04556            | 17.0 % | ✓ | 0.0012778    | 29.965  | 0.96359      | 16.506 | 3.16561      | 0.332 | 264.3856     | 0.041 | 947.995      | 0.005 | 3.58383 ±0.00327 | 10.36 ±0.01      | 99.95          | 3.01           | 118.0 ±38.9 |
| 20F04557            | 17.0 % | ✓ | 0.0038023    | 12.176  | 2.63110      | 5.834  | 7.87472      | 0.154 | 656.4936     | 0.041 | 2353.352     | 0.003 | 3.58263 ±0.00320 | 10.36 ±0.01      | 99.94          | 7.49           | 107.3 ±12.5 |
| 20F04559            | 17.0 % | ✓ | 0.0017341    | 23.993  | 2.76681      | 5.647  | 6.44504      | 0.174 | 537.4985     | 0.041 | 1927.807     | 0.003 | 3.58545 ±0.00303 | 10.36 ±0.01      | 99.97          | 6.13           | 83.5 ±9.4   |
| 20F04560            | 17.0 % | ✓ | 0.0010188    | 38.882  | 0.98698      | 16.451 | 4.07745      | 0.251 | 340.7566     | 0.041 | 1220.862     | 0.004 | 3.58340 ±0.00320 | 10.36 ±0.01      | 100.02         | 3.89           | 148.5 ±48.8 |
| 20F04562            | 17.0 % |   | 0.0118416    | 3.017   | 37.88106     | 0.608  | 0.23035      | 4.225 | 18.7285      | 0.066 | 67.186       | 0.035 | 3.56402 ±0.02524 | 10.30 ±0.07      | 99.22          | 0.21           | 0.2 ±0.0    |
| 20F04563            | 17.0 % |   | 0.3075667    | 0.318   | 0.48302      | 31.165 | 1.80640      | 0.531 | 146.5133     | 0.042 | 631.560      | 0.006 | 3.63937 ±0.52246 | 10.52 ±1.51      | 84.43          | 1.67           | 130.4 ±81.3 |
| 20F04565            | 17.0 % | ✓ | 0.0208357    | 1.792   | 1.08080      | 14.756 | 3.85973      | 0.268 | 320.6553     | 0.041 | 1156.162     | 0.005 | 3.58455 ±0.01625 | 10.36 ±0.05      | 99.42          | 3.66           | 127.6 ±37.6 |
| 20F04566            | 17.0 % |   | 0.0261945    | 1.507   | 85.05703     | 0.480  | 0.52553      | 1.752 | 42.5105      | 0.049 | 152.089      | 0.018 | 3.55757 ±0.02013 | 10.28 ±0.06      | 99.31          | 0.48           | 0.2 ±0.0    |
| 20F04568            | 17.0 % | ✓ | 0.0037551    | 10.924  | 1.46205      | 10.643 | 5.47623      | 0.190 | 457.7129     | 0.041 | 1642.402     | 0.003 | 3.58533 ±0.00352 | 10.36 ±0.01      | 99.92          | 5.22           | 134.6 ±28.7 |
| 20F04569            | 17.0 % | ✓ | 0.0011524    | 37.656  | 1.57659      | 9.473  | 6.01254      | 0.179 | 501.7792     | 0.041 | 1795.669     | 0.004 | 3.57754 ±0.00302 | 10.34 ±0.01      | 99.97          | 5.72           | 136.9 ±25.9 |
| 20F04571            | 17.0 % | ✓ | 0.0002453    | 149.442 | 0.92691      | 15.945 | 4.42582      | 0.229 | 369.1479     | 0.041 | 1323.623     | 0.004 | 3.58502 ±0.00303 | 10.36 ±0.01      | 99.98          | 4.21           | 171.3 ±54.6 |
| 20F04572            | 17.0 % | ✓ | 0.0054171    | 7.168   | 1.55597      | 9.464  | 4.44080      | 0.223 | 369.0678     | 0.041 | 1324.931     | 0.004 | 3.58501 ±0.00454 | 10.36 ±0.01      | 99.86          | 4.21           | 102.0 ±19.3 |
| 20F04574            | 17.0 % | ✓ | 0.0063264    | 6.267   | 1.49531      | 10.870 | 4.93375      | 0.210 | 411.0919     | 0.041 | 1473.495     | 0.004 | 3.57914 ±0.00469 | 10.35 ±0.01      | 99.85          | 4.69           | 118.2 ±25.7 |
| 20F04575            | 17.0 % | ✓ | 0.0012803    | 31.337  | 1.20226      | 13.951 | 4.02171      | 0.249 | 333.3457     | 0.041 | 1194.806     | 0.004 | 3.58277 ±0.00316 | 10.36 ±0.01      | 99.96          | 3.80           | 119.2 ±33.3 |
| 20F04577            | 17.0 % | ✓ | 0.0015856    | 21.312  | 0.61216      | 25.938 | 2.95082      | 0.348 | 245.4092     | 0.041 | 878.919      | 0.005 | 3.57899 ±0.00343 | 10.35 ±0.01      | 99.93          | 2.80           | 172.4 ±89.4 |
| 20F04578            | 17.0 % | ✓ | 0.0000832    | 381.126 | 0.87074      | 17.841 | 2.88394      | 0.350 | 239.7315     | 0.042 | 858.922      | 0.005 | 3.58246 ±0.00313 | 10.36 ±0.01      | 99.99          | 2.73           | 118.4 ±42.2 |
| 20F04580            | 17.0 % |   | 0.0085719    | 3.856   | 30.24294     | 0.677  | 0.33277      | 2.683 | 26.2553      | 0.058 | 93.902       | 0.028 | 3.57373 ±0.01010 | 10.33 ±0.03      | 99.85          | 0.30           | 0.4 ±0.0    |
| 20F04581            | 17.0 % |   | 0.0126457    | 2.666   | 42.05491     | 0.570  | 0.41174      | 2.141 | 34.0885      | 0.052 | 122.084      | 0.022 | 3.57163 ±0.01205 | 10.32 ±0.03      | 99.65          | 0.39           | 0.3 ±0.0    |
| 20F04583            | 17.0 % | ✓ | 0.0053610    | 7.683   | 1.17714      | 13.195 | 3.84816      | 0.243 | 323.7949     | 0.041 | 1162.078     | 0.005 | 3.58336 ±0.00496 | 10.36 ±0.01      | 99.84          | 3.69           | 118.3 ±31.2 |
| 20F04584            | 17.0 % | ✓ | 0.0018855    | 19.995  | 1.03484      | 14.697 | 4.71678      | 0.211 | 397.3655     | 0.041 | 1424.938     | 0.004 | 3.58407 ±0.00319 | 10.36 ±0.01      | 99.95          | 4.53           | 165.1 ±48.5 |
| 20F04586            | 17.0 % | ✓ | 0.0013363    | 29.711  | 1.43333      | 11.641 | 4.69884      | 0.210 | 394.2509     | 0.041 | 1412.098     | 0.004 | 3.58036 ±0.00309 | 10.35 ±0.01      | 99.96          | 4.50           | 118.3 ±27.5 |
| 20F04587            | 17.0 % |   | 0.0110397    | 3.297   | 31.17320     | 0.705  | 0.21426      | 4.372 | 18.4566      | 0.068 | 66.515       | 0.041 | 3.56187 ±0.03797 | 10.30 ±0.11      | 98.73          | 0.21           | 0.3 ±0.0    |
| 20F04589            | 17.0 % | ✓ | 0.0005692    | 62.223  | 1.32931      | 11.089 | 5.21130      | 0.200 | 435.1235     | 0.041 | 1559.027     | 0.004 | 3.58303 ±0.00305 | 10.36 ±0.01      | 100.00         | 4.96           | 140.8 ±31.2 |
| 20F04590            | 17.0 % | ✓ | 0.0024239    | 15.460  | 1.24654      | 12.507 | 4.20297      | 0.236 | 351.3639     | 0.041 | 1260.920     | 0.004 | 3.58615 ±0.00339 | 10.37 ±0.01      | 99.93          | 4.01           | 121.2 ±30.3 |
| 20F04592            | 17.0 % | ✓ | 0.0007877    | 38.242  | 0.56857      | 28.272 | 2.72035      | 0.371 | 228.2831     | 0.041 | 817.170      | 0.005 | 3.58035 ±0.00328 | 10.35 ±0.01      | 100.02         | 2.60           | 172.6 ±97.6 |
| 20F04593            | 17.0 % | ✓ | 0.0004466    | 67.562  | 0.49925      | 30.100 | 1.60503      | 0.602 | 133.8127     | 0.042 | 478.832      | 0.007 | 3.57703 ±0.00345 | 10.34 ±0.01      | 99.96          | 1.53           | 115.3 ±69.4 |
| 20F04595            | 17.0 % | ✓ | 0.0005337    | 66.589  | 1.05117      | 14.066 | 3.78274      | 0.271 | 316.2372     | 0.041 | 1132.279     | 0.005 | 3.57962 ±0.00307 | 10.35 ±0.01      | 99.98          | 3.61           | 129.4 ±36.4 |
| 20F04596            | 17.0 % |   | 0.0089043    | 3.509   | 28.94630     | 0.690  | 0.26729      | 3.590 | 22.1341      | 0.061 | 79.280       | 0.032 | 3.56860 ±0.01602 | 10.32 ±0.05      | 99.55          | 0.25           | 0.3 ±0.0    |
| Σ                   |        |   | 0.4484071    | 0.502   | 285.09998    | 0.349  | 105.14952    | 0.052 | 8769.3488    | 0.009 | 31545.390    | 0.001 |                  |                  |                |                |             |

| Information on Analysis and Constants Used in Calculations |  |
|------------------------------------------------------------|--|
| Project = SWENTON (18-58)                                  |  |
| Sample = VS17-056                                          |  |
| Material = Sanidine                                        |  |
| Location = South Fork                                      |  |
| Region = Eastern Oregon                                    |  |
| Analyst = Dan Miggins                                      |  |
| Irradiation = 19-OSU-02 (2C37-19)                          |  |
| Position = X: 0   Y: 0   Z/H: 46.23625 mm                  |  |
| FCT-NM Age = 28.201 ±0.023 Ma                              |  |
| FCT-NM Reference = Kuiper et al (2008)                     |  |
| FCT-NM 40Ar/39Ar Ratio = 9.80392 ±0.02363                  |  |
| FCT-NMJ-value = 0.00158360 ±0.00000382                     |  |
| Air Shot 40Ar/36Ar = 299.1640 ±0.3740                      |  |
| Air Shot MDF = 0.99949461 ±0.00040622 (LIN)                |  |
| Experiment Type = Total Fusion                             |  |
| Extraction Method = Single Crystal Laser Heating           |  |
| Heating = 62 sec                                           |  |
| Isolation = 1.62 min                                       |  |
| Instrument = ARGUS-VI-F                                    |  |
| Preferred Age = Ideogram Age                               |  |
| Age Classification = Eruption Age                          |  |
| IGSN = Undefined                                           |  |
| Rock Class = Undefined                                     |  |
| Lithology = Undefined                                      |  |
| Lat-Lon = Undefined - Undefined                            |  |

Age Equations = Min et al. (2000)  
Negative Intensities = Allowed  
Collector Calibrations = 36Ar  
Decay 40K = 5.463 ±0.107 E-10 1/a  
Decay 39Ar = 2.940 ±0.016 E-07 1/h  
Decay 37Ar = 8.230 ±0.012 E-04 1/h  
Decay 36Cl = 2.257 ±0.015 E-06 1/a  
Decay 40K(EC,β<sup>+</sup>) = 0.580 ±0.014 E-10 1/a  
Decay 40K(β<sup>-</sup>) = 4.884 ±0.099 E-10 1/a  
Atmospheric 40/36(a) = 319.60 ±124.49  
Atmospheric 38/36(a) = 0.1885 ±0.0003  
Production 39/37(ca) = 0.0006425 ±0.0000059  
Production 38/37(ca) = 0.0001800 ±0.0000173  
Production 36/37(ca) = 0.0002703 ±0.0000005  
Production 40/39(k) = 0.000607 ±0.000059  
Production 38/39(k) = 0.012077 ±0.000011  
Production 36/38(cl) = 262.80 ±1.71  
Scaling Ratio K/Ca = 0.430  
Abundance Ratio 40K/K = 1.1700 ±0.0100 E-04  
Atomic Weight K = 39.0983 ±0.0001 g

| Results                                          | 40(a)/36(a) ± 2σ         | 40(r)/39(k) ± 2σ           | Age ± 2σ<br>(Ma)                        | M\$WD             | 39Ar(k)<br>(%,n)                           | K/Ca ± 2σ  |
|--------------------------------------------------|--------------------------|----------------------------|-----------------------------------------|-------------------|--------------------------------------------|------------|
| Age Plateau<br>Error Mean                        |                          | 3.58224 ±0.00109<br>±0.03% | 10.35 ±0.05<br>±0.48%                   | 2.36<br>0%        | 96.48<br>23                                | 109.3 ±9.1 |
|                                                  |                          |                            | Full External Error<br>Analytical Error | 1.60<br>1.5360    | 2σ Confidence Limit<br>Error Magnification |            |
| Total Fusion Age                                 |                          | 3.58317 ±0.00878<br>±0.25% | 10.36 ±0.06<br>±0.54%                   |                   | 30                                         | 13.2 ±0.1  |
|                                                  |                          |                            | Full External Error<br>Analytical Error |                   |                                            |            |
| Normal Isochron<br>Error Chron                   | 274.73 ±80.84<br>±29.43% | 3.58501 ±0.00140<br>±0.04% | 10.36 ±0.05<br>±0.48%                   | 2.58<br>0%        | 96.48<br>23                                |            |
|                                                  |                          |                            | Full External Error<br>Analytical Error | 1.62<br>1.6053    | 2σ Confidence Limit<br>Error Magnification |            |
|                                                  |                          |                            |                                         | 1<br>0.0000000000 | Number of Iterations<br>Convergence        |            |
| Inverse Isochron<br>Error Chron                  | 363.79 ±73.96<br>±20.33% | 3.58210 ±0.00121<br>±0.03% | 10.35 ±0.05<br>±0.48%                   | 2.84<br>0%        | 96.48<br>23                                |            |
|                                                  |                          |                            | Full External Error<br>Analytical Error | 1.62<br>1.6866    | 2σ Confidence Limit<br>Error Magnification |            |
| Notes                                            |                          |                            |                                         | 3<br>0.0001133455 | Number of Iterations<br>Convergence        |            |
| Excess Initial 40Ar/36Ar = 319.60 ± 38.95 (%SD). |                          |                            |                                         | 1%                | Spreading Factor                           |            |

| Incremental Heating |        |   | 36Ar(a)<br>[fA] | 37Ar(ca)<br>[fA] | 38Ar(cl)<br>[fA] | 39Ar(k)<br>[fA] | 40Ar(r)<br>[fA] | Age ± 2σ<br>(Ma) | 40Ar(r)<br>(%) | 39Ar(k)<br>(%) | K/Ca ± 2σ   |
|---------------------|--------|---|-----------------|------------------|------------------|-----------------|-----------------|------------------|----------------|----------------|-------------|
| 20F04553            | 17.0 % | ✓ | 0.0042106       | 1.44391          | 0.0000000        | 427.5466        | 1530.898        | 10.35 ±0.01      | 99.90          | 4.88           | 127.3 ±27.7 |
| 20F04554            | 17.0 % | ✓ | 0.0004287       | 1.34619          | 0.0000000        | 405.8065        | 1453.872        | 10.36 ±0.01      | 99.99          | 4.63           | 129.6 ±31.0 |
| 20F04556            | 17.0 % | ✓ | 0.0010173       | 0.96359          | 0.0000000        | 264.3850        | 947.510         | 10.36 ±0.01      | 99.95          | 3.01           | 118.0 ±38.9 |
| 20F04557            | 17.0 % | ✓ | 0.0030911       | 2.63110          | 0.0000000        | 656.4919        | 2351.966        | 10.36 ±0.01      | 99.94          | 7.49           | 107.3 ±12.5 |
| 20F04559            | 17.0 % | ✓ | 0.0009862       | 2.76681          | 0.0000000        | 537.4968        | 1927.166        | 10.36 ±0.01      | 99.97          | 6.13           | 83.5 ±9.4   |
| 20F04560            | 17.0 % | ✓ | 0.0012855       | 0.98698          | 0.0000000        | 340.7559        | 1221.067        | 10.36 ±0.01      | 100.02         | 3.89           | 148.5 ±48.8 |
| 20F04562            | 17.0 % |   | 0.0016024       | 37.88106         | 0.0000000        | 18.7042         | 66.662          | 10.30 ±0.07      | 99.22          | 0.21           | 0.2 ±0.0    |
| 20F04563            | 17.0 % |   | 0.3074362       | 0.48302          | 0.0000000        | 146.5129        | 533.215         | 10.52 ±1.51      | 84.43          | 1.67           | 130.4 ±81.3 |
| 20F04565            | 17.0 % | ✓ | 0.0205435       | 1.08080          | 0.0000000        | 320.6546        | 1149.401        | 10.36 ±0.05      | 99.42          | 3.66           | 127.6 ±37.6 |
| 20F04566            | 17.0 % |   | 0.0032036       | 85.05703         | 0.0000000        | 42.4558         | 151.040         | 10.28 ±0.06      | 99.31          | 0.48           | 0.2 ±0.0    |
| 20F04568            | 17.0 % | ✓ | 0.0033599       | 1.46205          | 0.0000000        | 457.7120        | 1641.050        | 10.36 ±0.01      | 99.92          | 5.22           | 134.6 ±28.7 |
| 20F04569            | 17.0 % | ✓ | 0.0007262       | 1.57659          | 0.0000000        | 501.7782        | 1795.132        | 10.34 ±0.01      | 99.97          | 5.72           | 136.9 ±25.9 |
| 20F04571            | 17.0 % | ✓ | 0.0000052       | 0.92691          | 0.0000000        | 369.1473        | 1323.400        | 10.36 ±0.01      | 99.98          | 4.21           | 171.3 ±54.6 |
| 20F04572            | 17.0 % | ✓ | 0.0049965       | 1.55597          | 0.0000000        | 369.0668        | 1323.110        | 10.36 ±0.01      | 99.86          | 4.21           | 102.0 ±19.3 |
| 20F04574            | 17.0 % | ✓ | 0.0059222       | 1.49531          | 0.0000000        | 411.0909        | 1471.353        | 10.35 ±0.01      | 99.85          | 4.69           | 118.2 ±25.7 |
| 20F04575            | 17.0 % | ✓ | 0.0009554       | 1.20226          | 0.0000000        | 333.3449        | 1194.298        | 10.36 ±0.01      | 99.96          | 3.80           | 119.2 ±33.3 |
| 20F04577            | 17.0 % | ✓ | 0.0014201       | 0.61216          | 0.0000000        | 245.4088        | 878.317         | 10.35 ±0.01      | 99.93          | 2.80           | 172.4 ±89.4 |
| 20F04578            | 17.0 % | ✓ | 0.0001522       | 0.87074          | 0.0000000        | 239.7309        | 858.825         | 10.36 ±0.01      | 99.99          | 2.73           | 118.4 ±42.2 |
| 20F04580            | 17.0 % |   | 0.0003947       | 30.24294         | 0.0103967        | 26.2359         | 93.760          | 10.33 ±0.03      | 99.85          | 0.30           | 0.4 ±0.0    |
| 20F04581            | 17.0 % |   | 0.0012782       | 42.05491         | 0.0000000        | 34.0615         | 121.655         | 10.32 ±0.03      | 99.65          | 0.39           | 0.3 ±0.0    |
| 20F04583            | 17.0 % | ✓ | 0.0050428       | 1.17714          | 0.0000000        | 323.7941        | 1160.270        | 10.36 ±0.01      | 99.84          | 3.69           | 118.3 ±31.2 |
| 20F04584            | 17.0 % | ✓ | 0.0016057       | 1.03484          | 0.0000000        | 397.3648        | 1424.184        | 10.36 ±0.01      | 99.95          | 4.53           | 165.1 ±48.5 |
| 20F04586            | 17.0 % | ✓ | 0.0009489       | 1.43333          | 0.0000000        | 394.2500        | 1411.556        | 10.35 ±0.01      | 99.96          | 4.50           | 118.3 ±27.5 |
| 20F04587            | 17.0 % |   | 0.0026136       | 31.17320         | 0.0000000        | 18.4365         | 65.669          | 10.30 ±0.11      | 98.73          | 0.21           | 0.3 ±0.0    |
| 20F04589            | 17.0 % | ✓ | 0.0009286       | 1.32931          | 0.0000000        | 435.1227        | 1559.060        | 10.36 ±0.01      | 100.00         | 4.96           | 140.8 ±31.2 |
| 20F04590            | 17.0 % | ✓ | 0.0020870       | 1.24654          | 0.0000000        | 351.3631        | 1260.040        | 10.37 ±0.01      | 99.93          | 4.01           | 121.2 ±30.3 |
| 20F04592            | 17.0 % | ✓ | 0.0009414       | 0.56857          | 0.0000000        | 228.2827        | 817.332         | 10.35 ±0.01      | 100.02         | 2.60           | 172.6 ±97.6 |
| 20F04593            | 17.0 % | ✓ | 0.0003117       | 0.49925          | 0.0000000        | 133.8124        | 478.651         | 10.34 ±0.01      | 99.96          | 1.53           | 115.3 ±69.4 |
| 20F04595            | 17.0 % | ✓ | 0.0002496       | 1.05117          | 0.0000000        | 316.2365        | 1132.007        | 10.35 ±0.01      | 99.98          | 3.61           | 129.4 ±36.4 |
| 20F04596            | 17.0 % |   | 0.0010802       | 28.94630         | 0.0000000        | 22.1155         | 78.921          | 10.32 ±0.05      | 99.55          | 0.25           | 0.3 ±0.0    |
| Σ                   |        |   | 0.3713420       | 285.09998        | 0.0103967        | 8769.1656       | 31421.386       |                  |                |                |             |

| Information on Analysis                                                                                                                                                                                                                              | Results          | 40(r)/39(k) ± 2σ | Age ± 2σ<br>(Ma) | MSWD  | 39Ar(k)<br>(%,n) | K/Ca ± 2σ           |
|------------------------------------------------------------------------------------------------------------------------------------------------------------------------------------------------------------------------------------------------------|------------------|------------------|------------------|-------|------------------|---------------------|
| Project = SWENTON (18-58)<br>Sample = VS17-056<br>Material = Sanidine<br>Location = South Fork<br>Region = Eastern Oregon<br>Analyst = Dan Miggins<br>Irradiation = 19-OSU-02 (2C37-19)<br>J = 0.00158360 ± 0.00000382<br>FCT-NM = 28.201 ± 0.023 Ma | Age Plateau      | 3.58224          | ±0.00109         | 10.35 | ±0.05            | 2.36                |
|                                                                                                                                                                                                                                                      | Error Mean       |                  | ±0.03%           |       | ±0.48%           | 0%                  |
|                                                                                                                                                                                                                                                      |                  |                  |                  |       |                  | 1.60                |
|                                                                                                                                                                                                                                                      |                  |                  |                  |       |                  | 2σ Confidence Limit |
|                                                                                                                                                                                                                                                      |                  |                  |                  |       |                  | Error Magnification |
|                                                                                                                                                                                                                                                      | Total Fusion Age | 3.58317          | ±0.00878         | 10.36 | ±0.06            | 30                  |
|                                                                                                                                                                                                                                                      |                  |                  | ±0.25%           |       | ±0.54%           | 13.2 ±0.1           |
|                                                                                                                                                                                                                                                      |                  |                  |                  |       |                  |                     |
|                                                                                                                                                                                                                                                      |                  |                  |                  |       |                  |                     |
|                                                                                                                                                                                                                                                      |                  |                  |                  |       |                  |                     |

| Normal Isochron |        |   | 39(k)/36(a) ± 2σ       | 40(a+r)/36(a) ± 2σ      | r.i.   |
|-----------------|--------|---|------------------------|-------------------------|--------|
| 20F04553        | 17.0 % | ✓ | 101540.28 ±18344.22    | 363900.54 ±65741.43     | 1.0000 |
| 20F04554        | 17.0 % | ✓ | 946531.33 ±1846211.40  | 3390793.22 ±6613748.93  | 1.0000 |
| 20F04556        | 17.0 % | ✓ | 259889.49 ±196857.61   | 931718.18 ±705745.00    | 1.0000 |
| 20F04557        | 17.0 % | ✓ | 212379.65 ±63872.11    | 761196.75 ±228925.27    | 1.0000 |
| 20F04559        | 17.0 % | ✓ | 544998.50 ±462197.26   | 1954382.75 ±1657453.97  | 1.0000 |
| 20F04560        | 17.0 % | ✓ | 265069.66 ±164352.11   | 949532.34 ±588741.49    | 1.0000 |
| 20F04562        | 17.0 % |   | 11672.83 ±5290.51      | 41921.84 ±19000.29      | 1.0000 |
| 20F04563        | 17.0 % |   | 476.56 ±3.07           | 2053.99 ±13.10          | 0.9912 |
| 20F04565        | 17.0 % | ✓ | 15608.56 ±571.34       | 56269.20 ±2059.18       | 0.9997 |
| 20F04566        | 17.0 % |   | 13252.62 ±3406.04      | 47466.74 ±12199.30      | 1.0000 |
| 20F04568        | 17.0 % | ✓ | 136227.41 ±33439.21    | 488740.31 ±119968.50    | 1.0000 |
| 20F04569        | 17.0 % | ✓ | 690936.72 ±829270.45   | 2472174.44 ±2967132.40  | 1.0000 |
| 20F04571        | 17.0 % | ✓ | 70842351.90 #####      | 253970896.69 #####      | 1.0000 |
| 20F04572        | 17.0 % | ✓ | 73864.40 ±11540.67     | 265124.52 ±41422.82     | 1.0000 |
| 20F04574        | 17.0 % | ✓ | 69414.94 ±9350.96      | 248765.58 ±33510.86     | 1.0000 |
| 20F04575        | 17.0 % | ✓ | 348923.77 ±294937.46   | 1250433.54 ±1056963.01  | 1.0000 |
| 20F04577        | 17.0 % | ✓ | 172807.45 ±82901.76    | 618796.45 ±296857.81    | 1.0000 |
| 20F04578        | 17.0 % | ✓ | 1575044.91 ±6616444.09 | 5642208.13 ±23701771.15 | 1.0000 |
| 20F04580        | 17.0 % |   | 66472.71 ±112980.01    | 237875.05 ±404303.07    | 1.0000 |
| 20F04581        | 17.0 % |   | 26647.14 ±14336.91     | 95493.35 ±51378.02      | 1.0000 |
| 20F04583        | 17.0 % | ✓ | 64208.79 ±10543.31     | 230402.63 ±37832.43     | 1.0000 |
| 20F04584        | 17.0 % | ✓ | 247465.91 ±116891.66   | 887255.06 ±419098.36    | 1.0000 |
| 20F04586        | 17.0 % | ✓ | 415480.66 ±349927.19   | 1487888.89 ±1253133.01  | 1.0000 |
| 20F04587        | 17.0 % |   | 7054.09 ±1992.33       | 25445.36 ±7186.63       | 1.0000 |
| 20F04589        | 17.0 % | ✓ | 468602.67 ±359754.11   | 1678699.88 ±1288765.25  | 1.0000 |
| 20F04590        | 17.0 % | ✓ | 168360.42 ±60844.29    | 604085.11 ±218311.61    | 1.0000 |
| 20F04592        | 17.0 % | ✓ | 242493.97 ±156799.17   | 867893.87 ±561188.93    | 1.0000 |
| 20F04593        | 17.0 % | ✓ | 429349.02 ±838857.96   | 1536114.29 ±3001244.97  | 1.0000 |
| 20F04595        | 17.0 % | ✓ | 1267086.82 ±3631332.51 | 4536010.05 ±12999709.11 | 1.0000 |
| 20F04596        | 17.0 % |   | 20474.30 ±12032.05     | 73384.22 ±43125.35      | 1.0000 |

| Results         | 40(a)/36(a) ± 2σ      | 40(r)/39(k) ± 2σ | Age ± 2σ (Ma)             | MSWD            |
|-----------------|-----------------------|------------------|---------------------------|-----------------|
| Normal Isochron | 274.73 ±80.84         | 3.58501 ±0.00140 | 10.36 ±0.05               | 2.58            |
| Error Chron     | ±29.43%               | ±0.04%           | ±0.48%                    | 0%              |
|                 |                       |                  | Full External Error ±0.54 |                 |
|                 |                       |                  | Analytical Error ±0.00    |                 |
|                 |                       |                  |                           |                 |
| Statistics      | 2σ Confidence Limit   | 1.62             | Convergence               | 0.000000000001  |
|                 | Error Magnification   | 1.6053           | Number of Iterations      | 1               |
|                 | Number of Data Points | 23               | Calculated Line           | Weighted York-2 |

| Inverse Isochron |        |   | 39(k)/40(a+r) ± 2σ   | 36(a)/40(a+r) ± 2σ     | r.i.   |
|------------------|--------|---|----------------------|------------------------|--------|
| 20F04553         | 17.0 % | ✓ | 0.2790331 ±0.0002300 | 0.00000275 ±0.00000050 | 0.0000 |
| 20F04554         | 17.0 % | ✓ | 0.2791475 ±0.0002302 | 0.00000029 ±0.00000058 | 0.0000 |
| 20F04556         | 17.0 % | ✓ | 0.2789357 ±0.0002325 | 0.00000107 ±0.00000081 | 0.0000 |
| 20F04557         | 17.0 % | ✓ | 0.2790076 ±0.0002288 | 0.00000131 ±0.00000040 | 0.0000 |
| 20F04559         | 17.0 % | ✓ | 0.2788597 ±0.0002296 | 0.00000051 ±0.00000043 | 0.0000 |
| 20F04560         | 17.0 % | ✓ | 0.2791581 ±0.0002310 | 0.00000105 ±0.00000065 | 0.0000 |
| 20F04562         | 17.0 % |   | 0.2784428 ±0.0004150 | 0.00002385 ±0.00001081 | 0.0007 |
| 20F04563         | 17.0 % |   | 0.2320184 ±0.0001972 | 0.00048686 ±0.00000311 | 0.0026 |
| 20F04565         | 17.0 % | ✓ | 0.2773908 ±0.0002316 | 0.00001777 ±0.00000065 | 0.0003 |
| 20F04566         | 17.0 % |   | 0.2791980 ±0.0002903 | 0.00002107 ±0.00000541 | 0.0005 |
| 20F04568         | 17.0 % | ✓ | 0.2787317 ±0.0002299 | 0.00000205 ±0.00000050 | 0.0000 |
| 20F04569         | 17.0 % | ✓ | 0.2794854 ±0.0002302 | 0.00000040 ±0.00000049 | 0.0000 |
| 20F04571         | 17.0 % | ✓ | 0.2789389 ±0.0002303 | 0.00000000 ±0.00000056 | 0.0000 |
| 20F04572         | 17.0 % | ✓ | 0.2786027 ±0.0002302 | 0.00000377 ±0.00000059 | 0.0001 |
| 20F04574         | 17.0 % | ✓ | 0.2790376 ±0.0002304 | 0.00000402 ±0.00000054 | 0.0001 |
| 20F04575         | 17.0 % | ✓ | 0.2790422 ±0.0002318 | 0.00000080 ±0.00000068 | 0.0000 |
| 20F04577         | 17.0 % | ✓ | 0.2792638 ±0.0002331 | 0.00000162 ±0.00000078 | 0.0000 |
| 20F04578         | 17.0 % | ✓ | 0.2791540 ±0.0002346 | 0.00000018 ±0.00000074 | 0.0000 |
| 20F04580         | 17.0 % |   | 0.2794438 ±0.0003598 | 0.00000420 ±0.00000715 | 0.0001 |
| 20F04581         | 17.0 % |   | 0.2790471 ±0.0003151 | 0.00001047 ±0.00000563 | 0.0003 |
| 20F04583         | 17.0 % | ✓ | 0.2786808 ±0.0002315 | 0.00000434 ±0.00000071 | 0.0001 |
| 20F04584         | 17.0 % | ✓ | 0.2789118 ±0.0002304 | 0.00000113 ±0.00000053 | 0.0000 |
| 20F04586         | 17.0 % | ✓ | 0.2792417 ±0.0002310 | 0.00000067 ±0.00000057 | 0.0000 |
| 20F04587         | 17.0 % |   | 0.2772249 ±0.0004406 | 0.00003930 ±0.00001110 | 0.0015 |
| 20F04589         | 17.0 % | ✓ | 0.2791462 ±0.0002302 | 0.00000060 ±0.00000046 | 0.0000 |
| 20F04590         | 17.0 % | ✓ | 0.2787031 ±0.0002311 | 0.00000166 ±0.00000060 | 0.0000 |
| 20F04592         | 17.0 % | ✓ | 0.2794051 ±0.0002339 | 0.00000115 ±0.00000075 | 0.0000 |
| 20F04593         | 17.0 % | ✓ | 0.2795033 ±0.0002398 | 0.00000065 ±0.00000127 | 0.0000 |
| 20F04595         | 17.0 % | ✓ | 0.2793395 ±0.0002320 | 0.00000022 ±0.00000063 | 0.0000 |
| 20F04596         | 17.0 % |   | 0.2790014 ±0.0003870 | 0.00001363 ±0.00000801 | 0.0005 |

| Results          | 40(a)/36(a) ± 2σ      | 40(r)/39(k) ± 2σ          | Age ± 2σ (Ma)        | MSWD            |
|------------------|-----------------------|---------------------------|----------------------|-----------------|
| Inverse Isochron | 363.79 ±73.96         | 3.58210 ±0.00121          | 10.35 ±0.05          | 2.84            |
| Error Chron      | ±20.33%               | ±0.03%                    | ±0.48%               | 0%              |
|                  |                       | Full External Error ±0.54 |                      |                 |
|                  |                       | Analytical Error ±0.00    |                      |                 |
|                  |                       |                           |                      |                 |
| Statistics       | 2σ Confidence Limit   | 1.62                      | Convergence          | 0.0001133455    |
|                  | Error Magnification   | 1.6866                    | Number of Iterations | 3               |
|                  | Number of Data Points | 23                        | Calculated Line      | Weighted York-2 |
|                  | Spreading Factor      | 0.8%                      |                      |                 |

| Degassing Patterns |        |   | 36Ar(a)<br>[fA] | %1σ    | 36Ar(c)<br>[fA] | %1σ  | 36Ar(ca)<br>[fA] | %1σ       | 36Ar(cl)<br>[fA] | %1σ       | 37Ar(ca)<br>[fA] | %1σ   | 38Ar(a)<br>[fA] | %1σ    | 38Ar(c)<br>[fA] | %1σ  | 38Ar(k)<br>[fA] | %1σ  | 38Ar(ca)<br>[fA] | %1σ       | 38Ar(cl)<br>[fA] | %1σ   | 39Ar(k)<br>[fA] | %1σ       | 39Ar(ca)<br>[fA] | %1σ   |
|--------------------|--------|---|-----------------|--------|-----------------|------|------------------|-----------|------------------|-----------|------------------|-------|-----------------|--------|-----------------|------|-----------------|------|------------------|-----------|------------------|-------|-----------------|-----------|------------------|-------|
| 20F04553           | 17.0 % | ✓ | 0.0042106       | 9.03   | 0.0000000       | 0.00 | 0.0003903        | 10.89     | 0.0000000        | 0.00      | 1.44391          | 10.89 | 0.0007937       | 9.03   | 0.0000000       | 0.00 | 5.16348         | 0.10 | 0.0002599        | 14.54     | 0.0000000        | 0.00  | 427.5466        | 0.04      | 0.0009277        | 10.93 |
| 20F04554           | 17.0 % | ✓ | 0.0004287       | 97.53  | 0.0000000       | 0.00 | 0.0003639        | 11.94     | 0.0000000        | 0.00      | 1.34619          | 11.94 | 0.0000808       | 97.53  | 0.0000000       | 0.00 | 4.90092         | 0.10 | 0.0002423        | 15.34     | 0.0000000        | 0.00  | 405.8065        | 0.04      | 0.0008649        | 11.98 |
| 20F04556           | 17.0 % | ✓ | 0.0010173       | 37.87  | 0.0000000       | 0.00 | 0.0002605        | 16.51     | 0.0000000        | 0.00      | 0.96359          | 16.51 | 0.0001918       | 37.87  | 0.0000000       | 0.00 | 3.19298         | 0.10 | 0.0001734        | 19.11     | 0.0000000        | 0.00  | 264.3850        | 0.04      | 0.0006191        | 16.53 |
| 20F04557           | 17.0 % | ✓ | 0.0030911       | 15.04  | 0.0000000       | 0.00 | 0.0007112        | 5.84      | 0.0000000        | 0.00      | 2.63110          | 5.83  | 0.0005827       | 15.04  | 0.0000000       | 0.00 | 7.92845         | 0.10 | 0.0004736        | 11.26     | 0.0000000        | 0.00  | 656.4919        | 0.04      | 0.0016905        | 5.91  |
| 20F04559           | 17.0 % | ✓ | 0.0009862       | 42.40  | 0.0000000       | 0.00 | 0.0007479        | 5.65      | 0.0000000        | 0.00      | 2.76681          | 5.65  | 0.0001859       | 42.40  | 0.0000000       | 0.00 | 6.49135         | 0.10 | 0.0004980        | 11.16     | 0.0000000        | 0.00  | 537.4968        | 0.04      | 0.0017777        | 5.72  |
| 20F04560           | 17.0 % | ✓ | 0.0012855       | 31.00  | 0.0000000       | 0.00 | 0.0002668        | 16.45     | 0.0000000        | 0.00      | 0.98698          | 16.45 | 0.0002423       | 31.00  | 0.0000000       | 0.00 | 4.11531         | 0.10 | 0.0001777        | 19.06     | 0.0000000        | 0.00  | 340.7559        | 0.04      | 0.0006341        | 16.48 |
| 20F04562           | 17.0 % |   | 0.0016024       | 22.66  | 0.0000000       | 0.00 | 0.0102392        | 0.63      | 0.0000000        | 0.00      | 37.88106         | 0.61  | 0.0003020       | 22.66  | 0.0000000       | 0.00 | 0.22589         | 0.11 | 0.0068186        | 9.65      | 0.0000000        | 0.00  | 18.7042         | 0.07      | 0.0243386        | 1.10  |
| 20F04563           | 17.0 % |   | 0.3074362       | 0.32   | 0.0000000       | 0.00 | 0.0001306        | 31.17     | 0.0000000        | 0.00      | 0.48302          | 31.16 | 0.0579517       | 0.36   | 0.0000000       | 0.00 | 1.76944         | 0.10 | 0.0000869        | 32.62     | 0.0000000        | 0.00  | 146.5129        | 0.04      | 0.0003103        | 31.18 |
| 20F04565           | 17.0 % | ✓ | 0.0205435       | 1.83   | 0.0000000       | 0.00 | 0.0002921        | 14.76     | 0.0000000        | 0.00      | 1.08080          | 14.76 | 0.0038725       | 1.84   | 0.0000000       | 0.00 | 3.87255         | 0.10 | 0.0001945        | 17.62     | 0.0000000        | 0.00  | 320.6546        | 0.04      | 0.0006944        | 14.78 |
| 20F04566           | 17.0 % |   | 0.0032036       | 12.85  | 0.0000000       | 0.00 | 0.0229909        | 0.51      | 0.0000000        | 0.00      | 85.05703         | 0.48  | 0.0006039       | 12.85  | 0.0000000       | 0.00 | 0.51274         | 0.10 | 0.0153103        | 9.64      | 0.0000000        | 0.00  | 42.4558         | 0.05      | 0.0546491        | 1.04  |
| 20F04568           | 17.0 % | ✓ | 0.0033599       | 12.27  | 0.0000000       | 0.00 | 0.0003952        | 10.64     | 0.0000000        | 0.00      | 1.46205          | 10.64 | 0.0006333       | 12.27  | 0.0000000       | 0.00 | 5.52779         | 0.10 | 0.0002632        | 14.35     | 0.0000000        | 0.00  | 457.7120        | 0.04      | 0.0009394        | 10.68 |
| 20F04569           | 17.0 % | ✓ | 0.0007262       | 60.01  | 0.0000000       | 0.00 | 0.0004262        | 9.47      | 0.0000000        | 0.00      | 1.57659          | 9.47  | 0.0001369       | 60.01  | 0.0000000       | 0.00 | 6.05998         | 0.10 | 0.0002838        | 13.51     | 0.0000000        | 0.00  | 501.7782        | 0.04      | 0.0010130        | 9.52  |
| 20F04571           | 17.0 % | ✓ | 0.0000052       | #####  | 0.0000000       | 0.00 | 0.0002505        | 15.95     | 0.0000000        | 0.00      | 0.92691          | 15.94 | 0.0000010       | #####  | 0.0000000       | 0.00 | 4.45819         | 0.10 | 0.0001668        | 18.63     | 0.0000000        | 0.00  | 369.1473        | 0.04      | 0.0005955        | 15.97 |
| 20F04572           | 17.0 % | ✓ | 0.0049965       | 7.81   | 0.0000000       | 0.00 | 0.0004206        | 9.47      | 0.0000000        | 0.00      | 1.55597          | 9.46  | 0.0009418       | 7.81   | 0.0000000       | 0.00 | 4.45722         | 0.10 | 0.0002801        | 13.50     | 0.0000000        | 0.00  | 369.0668        | 0.04      | 0.0009997        | 9.51  |
| 20F04574           | 17.0 % | ✓ | 0.0059222       | 6.74   | 0.0000000       | 0.00 | 0.0004042        | 10.87     | 0.0000000        | 0.00      | 1.49531          | 10.87 | 0.0011163       | 6.74   | 0.0000000       | 0.00 | 4.96475         | 0.10 | 0.0002692        | 14.52     | 0.0000000        | 0.00  | 411.0909        | 0.04      | 0.0009607        | 10.91 |
| 20F04575           | 17.0 % | ✓ | 0.0009554       | 42.26  | 0.0000000       | 0.00 | 0.0003250        | 13.95     | 0.0000000        | 0.00      | 1.20226          | 13.95 | 0.0001801       | 42.26  | 0.0000000       | 0.00 | 4.02581         | 0.10 | 0.0002164        | 16.95     | 0.0000000        | 0.00  | 333.3449        | 0.04      | 0.0007725        | 13.98 |
| 20F04577           | 17.0 % | ✓ | 0.0014201       | 23.99  | 0.0000000       | 0.00 | 0.0001655        | 25.94     | 0.0000000        | 0.00      | 0.61216          | 25.94 | 0.0002677       | 23.99  | 0.0000000       | 0.00 | 2.96380         | 0.10 | 0.0001102        | 27.67     | 0.0000000        | 0.00  | 245.4088        | 0.04      | 0.0003933        | 25.95 |
| 20F04578           | 17.0 % | ✓ | 0.0001522       | 210.04 | 0.0000000       | 0.00 | 0.0002354        | 17.84     | 0.0000000        | 0.00      | 0.87074          | 17.84 | 0.0000287       | 210.04 | 0.0000000       | 0.00 | 2.89523         | 0.10 | 0.0001567        | 20.27     | 0.0000000        | 0.00  | 239.7309        | 0.04      | 0.0005594        | 17.86 |
| 20F04580           | 17.0 % |   | 0.0003947       | 84.98  | 0.0000000       | 0.00 | 0.0081747        | 0.70      | 0.0000025        | 86.37     | 30.24294         | 0.68  | 0.0000744       | 84.98  | 0.0000000       | 0.00 | 0.31685         | 0.11 | 0.0054437        | 9.65      | 0.0103967        | 86.38 | 26.2359         | 0.06      | 0.0194311        | 1.14  |
| 20F04581           | 17.0 % |   | 0.0012782       | 26.90  | 0.0000000       | 0.00 | 0.0113674        | 0.59      | 0.0000000        | 0.00      | 42.05491         | 0.57  | 0.0002409       | 26.90  | 0.0000000       | 0.00 | 0.41136         | 0.10 | 0.0075699        | 9.65      | 0.0000000        | 0.00  | 34.0615         | 0.05      | 0.0270203        | 1.08  |
| 20F04583           | 17.0 % | ✓ | 0.0050428       | 8.21   | 0.0000000       | 0.00 | 0.0003182        | 13.20     | 0.0000000        | 0.00      | 1.17714          | 13.19 | 0.0009506       | 8.21   | 0.0000000       | 0.00 | 3.91046         | 0.10 | 0.0002119        | 16.34     | 0.0000000        | 0.00  | 323.7941        | 0.04      | 0.0007563        | 13.23 |
| 20F04584           | 17.0 % | ✓ | 0.0016057       | 23.62  | 0.0000000       | 0.00 | 0.0002797        | 14.70     | 0.0000000        | 0.00      | 1.03484          | 14.70 | 0.0003027       | 23.62  | 0.0000000       | 0.00 | 4.79897         | 0.10 | 0.0001863        | 17.57     | 0.0000000        | 0.00  | 397.3648        | 0.04      | 0.0006649        | 14.73 |
| 20F04586           | 17.0 % | ✓ | 0.0009489       | 42.11  | 0.0000000       | 0.00 | 0.0003874        | 11.64     | 0.0000000        | 0.00      | 1.43333          | 11.64 | 0.0001789       | 42.11  | 0.0000000       | 0.00 | 4.76136         | 0.10 | 0.0002580        | 15.11     | 0.0000000        | 0.00  | 394.2500        | 0.04      | 0.0009209        | 11.68 |
| 20F04587           | 17.0 % |   | 0.0026136       | 14.12  | 0.0000000       | 0.00 | 0.0084261        | 0.72      | 0.0000000        | 0.00      | 31.17320         | 0.70  | 0.0004927       | 14.12  | 0.0000000       | 0.00 | 0.22266         | 0.11 | 0.0056112        | 9.66      | 0.0000000        | 0.00  | 18.4365         | 0.07      | 0.0200288        | 1.16  |
| 20F04589           | 17.0 % | ✓ | 0.0009286       | 38.39  | 0.0000000       | 0.00 | 0.0003593        | 11.09     | 0.0000000        | 0.00      | 1.32931          | 11.09 | 0.0001750       | 38.39  | 0.0000000       | 0.00 | 5.25498         | 0.10 | 0.0002393        | 14.69     | 0.0000000        | 0.00  | 435.1227        | 0.04      | 0.0008541        | 11.13 |
| 20F04590           | 17.0 % | ✓ | 0.0020870       | 18.07  | 0.0000000       | 0.00 | 0.0003369        | 12.51     | 0.0000000        | 0.00      | 1.24654          | 12.51 | 0.0003934       | 18.07  | 0.0000000       | 0.00 | 4.24341         | 0.10 | 0.0002244        | 15.78     | 0.0000000        | 0.00  | 351.3631        | 0.04      | 0.0008009        | 12.54 |
| 20F04592           | 17.0 % | ✓ | 0.0009414       | 32.33  | 0.0000000       | 0.00 | 0.0001537        | 28.27     | 0.0000000        | 0.00      | 0.56857          | 28.27 | 0.0001775       | 32.33  | 0.0000000       | 0.00 | 2.75697         | 0.10 | 0.0001023        | 29.87     | 0.0000000        | 0.00  | 228.2827        | 0.04      | 0.0003653        | 28.29 |
| 20F04593           | 17.0 % | ✓ | 0.0003117       | 97.69  | 0.0000000       | 0.00 | 0.0001349        | 30.10     | 0.0000000        | 0.00      | 0.49925          | 30.10 | 0.0000587       | 97.69  | 0.0000000       | 0.00 | 1.61605         | 0.10 | 0.0000899        | 31.60     | 0.0000000        | 0.00  | 133.8124        | 0.04      | 0.0003208        | 30.11 |
| 20F04595           | 17.0 % | ✓ | 0.0002496       | 143.29 | 0.0000000       | 0.00 | 0.0002841        | 14.07     | 0.0000000        | 0.00      | 1.05117          | 14.07 | 0.0000470       | 143.29 | 0.0000000       | 0.00 | 3.81919         | 0.10 | 0.0001892        | 17.05     | 0.0000000        | 0.00  | 316.2365        | 0.04      | 0.0006754        | 14.10 |
| 20F04596           | 17.0 % |   | 0.0010802       | 29.38  | 0.0000000       | 0.00 | 0.0078242        | 0.71      | 0.0000000        | 0.00      | 28.94630         | 0.69  | 0.0002036       | 29.38  | 0.0000000       | 0.00 | 0.26709         | 0.11 | 0.0052103        | 9.65      | 0.0000000        | 0.00  | 22.1155         | 0.06      | 0.0185980        | 1.15  |
| Σ                  |        |   | 0.3713420       | 0.61   | 0.0000000       | 0.00 | 0.0770625        | 0.36      | 0.0000025        | 86.37     | 285.09998        | 0.35  | 0.0699980       | 0.62   | 0.0000000       | 0.00 | 105.90521       | 0.02 | 0.0513180        | 3.90      | 0.0103967        | 86.38 | 8769.1656       | 0.01      | 0.1831767        | 0.51  |
| Σ                  |        |   |                 |        |                 |      |                  | 0.4484071 | 0.51             | 285.09998 | 0.35             |       |                 |        |                 |      |                 |      |                  | 106.03693 | 0.02             |       |                 | 8769.3488 | 0.01             |       |

| 40Ar(r)<br>[fA] | %1σ  | 40Ar(a)<br>[fA] | %1σ    | 40Ar(c)<br>[fA] | %1σ  | 40Ar(k)<br>[fA] | %1σ  |
|-----------------|------|-----------------|--------|-----------------|------|-----------------|------|
| 1530.898        | 0.04 | 1.34571         | 39.98  | 0.0000000       | 0.00 | 0.2595208       | 9.65 |
| 1453.872        | 0.01 | 0.13702         | 105.02 | 0.0000000       | 0.00 | 0.2463245       | 9.65 |
| 947.510         | 0.02 | 0.32513         | 54.33  | 0.0000000       | 0.00 | 0.1604817       | 9.65 |
| 2351.966        | 0.02 | 0.98792         | 41.75  | 0.0000000       | 0.00 | 0.3984906       | 9.65 |
| 1927.166        | 0.01 | 0.31520         | 57.58  | 0.0000000       | 0.00 | 0.3262605       | 9.65 |
| 1221.067        | 0.02 | 0.41086         | 49.78  | 0.0000000       | 0.00 | 0.2068389       | 9.65 |
| 66.662          | 0.35 | 0.51212         | 45.06  | 0.0000000       | 0.00 | 0.0113534       | 9.65 |
| 533.215         | 7.18 | 98.25660        | 38.95  | 0.0000000       | 0.00 | 0.0889334       | 9.65 |
| 1149.401        | 0.22 | 6.56571         | 38.99  | 0.0000000       | 0.00 | 0.1946373       | 9.65 |
| 151.040         | 0.28 | 1.02386         | 41.02  | 0.0000000       | 0.00 | 0.0257707       | 9.65 |
| 1641.050        | 0.03 | 1.07383         | 40.84  | 0.0000000       | 0.00 | 0.2778312       | 9.65 |
| 1795.132        | 0.01 | 0.23210         | 71.54  | 0.0000000       | 0.00 | 0.3045794       | 9.65 |
| 1323.400        | 0.01 | 0.00167         | #####  | 0.0000000       | 0.00 | 0.2240724       | 9.65 |
| 1323.110        | 0.05 | 1.59690         | 39.73  | 0.0000000       | 0.00 | 0.2240236       | 9.65 |
| 1471.353        | 0.05 | 1.89274         | 39.53  | 0.0000000       | 0.00 | 0.2495322       | 9.65 |
| 1194.298        | 0.02 | 0.30533         | 57.48  | 0.0000000       | 0.00 | 0.2023404       | 9.65 |
| 878.317         | 0.02 | 0.45387         | 45.74  | 0.0000000       | 0.00 | 0.1489631       | 9.65 |
| 858.825         | 0.01 | 0.04864         | 213.62 | 0.0000000       | 0.00 | 0.1455167       | 9.65 |
| 93.760          | 0.13 | 0.12614         | 93.48  | 0.0000000       | 0.00 | 0.0159252       | 9.65 |
| 121.655         | 0.16 | 0.40853         | 47.34  | 0.0000000       | 0.00 | 0.0206753       | 9.65 |
| 1160.270        | 0.06 | 1.61169         | 39.81  | 0.0000000       | 0.00 | 0.1965430       | 9.65 |
| 1424.184        | 0.02 | 0.51319         | 45.55  | 0.0000000       | 0.00 | 0.2412004       | 9.65 |
| 1411.556        | 0.01 | 0.30327         | 57.36  | 0.0000000       | 0.00 | 0.2393097       | 9.65 |
| 65.669          | 0.53 | 0.83530         | 41.43  | 0.0000000       | 0.00 | 0.0111910       | 9.65 |
| 1559.060        | 0.01 | 0.29677         | 54.69  | 0.0000000       | 0.00 | 0.2641195       | 9.65 |
| 1260.040        | 0.02 | 0.66700         | 42.94  | 0.0000000       | 0.00 | 0.2132774       | 9.65 |
| 817.332         | 0.02 | 0.30087         | 50.62  | 0.0000000       | 0.00 | 0.1385676       | 9.65 |
| 478.651         | 0.02 | 0.09961         | 105.17 | 0.0000000       | 0.00 | 0.0812241       | 9.65 |
| 1132.007        | 0.01 | 0.07977         | 148.49 | 0.0000000       | 0.00 | 0.1919556       | 9.65 |
| 78.921          | 0.22 | 0.34522         | 48.79  | 0.0000000       | 0.00 | 0.0134241       | 9.65 |
| 31421.386       | 0.12 | 118.68091       | 32.35  | 0.0000000       | 0.00 | 5.3228835       | 2.03 |
|                 |      |                 |        |                 |      | 31545.390       | 0.17 |



| Additional<br>Parameters |        |   | 40Ar/39Ar | 1σ       | 37Ar/39Ar | 1σ       | 36Ar/39Ar | 1σ       | Time<br>(days) | 37Ar<br>(decay) | 39Ar<br>(decay) | 40Ar<br>(moles) |
|--------------------------|--------|---|-----------|----------|-----------|----------|-----------|----------|----------------|-----------------|-----------------|-----------------|
| 20F04553                 | 17.0 % | ✓ | 3.584404  | 0.001476 | 0.003377  | 0.000368 | 0.000011  | 0.000001 | 148.606        | 18.873119       | 1.00105000      | 5.425E-11       |
| 20F04554                 | 17.0 % | ✓ | 3.582935  | 0.001476 | 0.003317  | 0.000396 | 0.000000  | 0.000001 | 148.613        | 18.875449       | 1.00105004      | 5.147E-11       |
| 20F04556                 | 17.0 % | ✓ | 3.585654  | 0.001493 | 0.003645  | 0.000602 | 0.000005  | 0.000001 | 148.624        | 18.879851       | 1.00105013      | 3.356E-11       |
| 20F04557                 | 17.0 % | ✓ | 3.584730  | 0.001469 | 0.004008  | 0.000234 | 0.000006  | 0.000001 | 148.631        | 18.882182       | 1.00105017      | 8.331E-11       |
| 20F04559                 | 17.0 % | ✓ | 3.586628  | 0.001475 | 0.005148  | 0.000291 | 0.000003  | 0.000001 | 148.642        | 18.886585       | 1.00105025      | 6.824E-11       |
| 20F04560                 | 17.0 % | ✓ | 3.582800  | 0.001481 | 0.002896  | 0.000477 | 0.000001  | 0.000001 | 148.648        | 18.888658       | 1.00105029      | 4.322E-11       |
| 20F04562                 | 17.0 % |   | 3.587341  | 0.002669 | 2.022641  | 0.012375 | 0.000632  | 0.000019 | 148.660        | 18.893063       | 1.00105038      | 2.378E-12       |
| 20F04563                 | 17.0 % |   | 4.310601  | 0.001831 | 0.003297  | 0.001027 | 0.002099  | 0.000007 | 148.666        | 18.895395       | 1.00105042      | 2.236E-11       |
| 20F04565                 | 17.0 % | ✓ | 3.605622  | 0.001504 | 0.003371  | 0.000497 | 0.000065  | 0.000001 | 148.678        | 18.899802       | 1.00105050      | 4.093E-11       |
| 20F04566                 | 17.0 % |   | 3.577689  | 0.001856 | 2.000850  | 0.009650 | 0.000616  | 0.000009 | 148.684        | 18.902135       | 1.00105055      | 5.384E-12       |
| 20F04568                 | 17.0 % | ✓ | 3.588279  | 0.001479 | 0.003194  | 0.000340 | 0.000008  | 0.000001 | 148.696        | 18.906544       | 1.00105063      | 5.814E-11       |
| 20F04569                 | 17.0 % | ✓ | 3.578604  | 0.001472 | 0.003142  | 0.000298 | 0.000002  | 0.000001 | 148.701        | 18.908618       | 1.00105067      | 6.357E-11       |
| 20F04571                 | 17.0 % | ✓ | 3.585616  | 0.001479 | 0.002511  | 0.000400 | 0.000001  | 0.000001 | 148.714        | 18.913287       | 1.00105076      | 4.686E-11       |
| 20F04572                 | 17.0 % | ✓ | 3.589938  | 0.001482 | 0.004216  | 0.000399 | 0.000015  | 0.000001 | 148.719        | 18.915363       | 1.00105080      | 4.690E-11       |
| 20F04574                 | 17.0 % | ✓ | 3.584346  | 0.001479 | 0.003637  | 0.000395 | 0.000015  | 0.000001 | 148.731        | 18.919774       | 1.00105088      | 5.216E-11       |
| 20F04575                 | 17.0 % | ✓ | 3.584286  | 0.001488 | 0.003607  | 0.000503 | 0.000004  | 0.000001 | 148.738        | 18.922110       | 1.00105093      | 4.230E-11       |
| 20F04577                 | 17.0 % | ✓ | 3.581445  | 0.001494 | 0.002494  | 0.000647 | 0.000006  | 0.000001 | 148.749        | 18.926523       | 1.00105101      | 3.111E-11       |
| 20F04578                 | 17.0 % | ✓ | 3.582851  | 0.001504 | 0.003632  | 0.000648 | 0.000000  | 0.000001 | 148.755        | 18.928600       | 1.00105105      | 3.041E-11       |
| 20F04580                 | 17.0 % |   | 3.576495  | 0.002300 | 1.151879  | 0.007824 | 0.000326  | 0.000013 | 148.767        | 18.933274       | 1.00105114      | 3.324E-12       |
| 20F04581                 | 17.0 % |   | 3.581390  | 0.002020 | 1.233697  | 0.007056 | 0.000371  | 0.000010 | 148.773        | 18.935352       | 1.00105118      | 4.322E-12       |
| 20F04583                 | 17.0 % | ✓ | 3.588933  | 0.001490 | 0.003635  | 0.000480 | 0.000017  | 0.000001 | 148.785        | 18.939768       | 1.00105126      | 4.114E-11       |
| 20F04584                 | 17.0 % | ✓ | 3.585964  | 0.001480 | 0.002604  | 0.000383 | 0.000005  | 0.000001 | 148.791        | 18.942106       | 1.00105130      | 5.044E-11       |
| 20F04586                 | 17.0 % | ✓ | 3.581725  | 0.001480 | 0.003636  | 0.000423 | 0.000003  | 0.000001 | 148.803        | 18.946523       | 1.00105139      | 4.999E-11       |
| 20F04587                 | 17.0 % |   | 3.603872  | 0.002860 | 1.689005  | 0.011955 | 0.000598  | 0.000020 | 148.809        | 18.948862       | 1.00105143      | 2.355E-12       |
| 20F04589                 | 17.0 % | ✓ | 3.582952  | 0.001476 | 0.003055  | 0.000339 | 0.000001  | 0.000001 | 148.821        | 18.953282       | 1.00105151      | 5.519E-11       |
| 20F04590                 | 17.0 % | ✓ | 3.588646  | 0.001487 | 0.003548  | 0.000444 | 0.000007  | 0.000001 | 148.826        | 18.955361       | 1.00105155      | 4.464E-11       |
| 20F04592                 | 17.0 % | ✓ | 3.579634  | 0.001497 | 0.002491  | 0.000704 | 0.000003  | 0.000001 | 148.838        | 18.959782       | 1.00105164      | 2.893E-11       |
| 20F04593                 | 17.0 % | ✓ | 3.578374  | 0.001534 | 0.003731  | 0.001123 | 0.000003  | 0.000002 | 148.844        | 18.962123       | 1.00105168      | 1.695E-11       |
| 20F04595                 | 17.0 % | ✓ | 3.580472  | 0.001486 | 0.003324  | 0.000468 | 0.000002  | 0.000001 | 148.856        | 18.966545       | 1.00105176      | 4.008E-11       |
| 20F04596                 | 17.0 % |   | 3.581806  | 0.002481 | 1.307772  | 0.009062 | 0.000402  | 0.000014 | 148.863        | 18.968886       | 1.00105181      | 2.807E-12       |

| Procedure<br>Blanks |        | 36Ar ± 1σ (SE)<br>[fA] | 37Ar ± 1σ (SE)<br>[fA] | 38Ar ± 1σ (SE)<br>[fA] | 39Ar ± 1σ (SE)<br>[fA] | 40Ar ± 1σ (SE)<br>[fA] |
|---------------------|--------|------------------------|------------------------|------------------------|------------------------|------------------------|
| 20F04553            | 17.0 % | 0.0087714 ±0.0002114   | 0.0206285 ±0.0057326   | 0.0239100 ±0.0058391   | 0.0239108 ±0.0058858   | 1.9020590 ±0.0163051   |
| 20F04554            | 17.0 % | 0.0087714 ±0.0002114   | 0.0206285 ±0.0057326   | 0.0239100 ±0.0058391   | 0.0239108 ±0.0058858   | 1.9020590 ±0.0163051   |
| 20F04556            | 17.0 % | 0.0084081 ±0.0002447   | 0.0251650 ±0.0060028   | 0.0376834 ±0.0070076   | 0.0246815 ±0.0070432   | 1.8912407 ±0.0140482   |
| 20F04557            | 17.0 % | 0.0084081 ±0.0002447   | 0.0251650 ±0.0060028   | 0.0376834 ±0.0070076   | 0.0246815 ±0.0070432   | 1.8912407 ±0.0140482   |
| 20F04559            | 17.0 % | 0.0091984 ±0.0002150   | 0.0161057 ±0.0061818   | 0.0316205 ±0.0069214   | 0.0331454 ±0.0064616   | 2.0088794 ±0.0161622   |
| 20F04560            | 17.0 % | 0.0091984 ±0.0002150   | 0.0161057 ±0.0061818   | 0.0316205 ±0.0069214   | 0.0331454 ±0.0064616   | 2.0088794 ±0.0161622   |
| 20F04562            | 17.0 % | 0.0079837 ±0.0002293   | 0.0174128 ±0.0060932   | 0.0334806 ±0.0067602   | 0.0305408 ±0.0059141   | 1.8201870 ±0.0153176   |
| 20F04563            | 17.0 % | 0.0079837 ±0.0002293   | 0.0174128 ±0.0060932   | 0.0334806 ±0.0067602   | 0.0305408 ±0.0059141   | 1.8201870 ±0.0153176   |
| 20F04565            | 17.0 % | 0.0082046 ±0.0001717   | 0.0184466 ±0.0057959   | 0.0381680 ±0.0062391   | 0.0250381 ±0.0063386   | 1.7857412 ±0.0164023   |
| 20F04566            | 17.0 % | 0.0082046 ±0.0001717   | 0.0184466 ±0.0057959   | 0.0381680 ±0.0062391   | 0.0250381 ±0.0063386   | 1.7857412 ±0.0164023   |
| 20F04568            | 17.0 % | 0.0082284 ±0.0002104   | 0.0131238 ±0.0058562   | 0.0327522 ±0.0064603   | 0.0096365 ±0.0065007   | 1.8445215 ±0.0171797   |
| 20F04569            | 17.0 % | 0.0082284 ±0.0002104   | 0.0131238 ±0.0058562   | 0.0327522 ±0.0064603   | 0.0096365 ±0.0065007   | 1.8445215 ±0.0171797   |
| 20F04571            | 17.0 % | 0.0090509 ±0.0001976   | 0.0186084 ±0.0054726   | 0.0338337 ±0.0063922   | 0.0301977 ±0.0060934   | 1.9003823 ±0.0164582   |
| 20F04572            | 17.0 % | 0.0090509 ±0.0001976   | 0.0186084 ±0.0054726   | 0.0338337 ±0.0063922   | 0.0301977 ±0.0060934   | 1.9003823 ±0.0164582   |
| 20F04574            | 17.0 % | 0.0095814 ±0.0002050   | 0.0227890 ±0.0062316   | 0.0295193 ±0.0065516   | 0.0349604 ±0.0060084   | 2.1342499 ±0.0149476   |
| 20F04575            | 17.0 % | 0.0095814 ±0.0002050   | 0.0227890 ±0.0062316   | 0.0295193 ±0.0065516   | 0.0349604 ±0.0060084   | 2.1342499 ±0.0149476   |
| 20F04577            | 17.0 % | 0.0082707 ±0.0001953   | 0.0101976 ±0.0059265   | 0.0280210 ±0.0071063   | 0.0282756 ±0.0058181   | 1.8696614 ±0.0151070   |
| 20F04578            | 17.0 % | 0.0082707 ±0.0001953   | 0.0101976 ±0.0059265   | 0.0280210 ±0.0071063   | 0.0282756 ±0.0058181   | 1.8696614 ±0.0151070   |
| 20F04580            | 17.0 % | 0.0085888 ±0.0002006   | 0.0226839 ±0.0058091   | 0.0386901 ±0.0062714   | 0.0209170 ±0.0066879   | 1.7625777 ±0.0157672   |
| 20F04581            | 17.0 % | 0.0085888 ±0.0002006   | 0.0226839 ±0.0058091   | 0.0386901 ±0.0062714   | 0.0209170 ±0.0066879   | 1.7625777 ±0.0157672   |
| 20F04583            | 17.0 % | 0.0080749 ±0.0002172   | 0.0126059 ±0.0054315   | 0.0187037 ±0.0059111   | 0.0113316 ±0.0069315   | 1.8954294 ±0.0152045   |
| 20F04584            | 17.0 % | 0.0080749 ±0.0002172   | 0.0126059 ±0.0054315   | 0.0187037 ±0.0059111   | 0.0113316 ±0.0069315   | 1.8954294 ±0.0152045   |
| 20F04586            | 17.0 % | 0.0076684 ±0.0002226   | 0.0241580 ±0.0061455   | 0.0227453 ±0.0065899   | 0.0419193 ±0.0067573   | 1.7495180 ±0.0168379   |
| 20F04587            | 17.0 % | 0.0076684 ±0.0002226   | 0.0241580 ±0.0061455   | 0.0227453 ±0.0065899   | 0.0419193 ±0.0067573   | 1.7495180 ±0.0168379   |
| 20F04589            | 17.0 % | 0.0086362 ±0.0002057   | 0.0097656 ±0.0055931   | 0.0219420 ±0.0065927   | 0.0284193 ±0.0056760   | 1.8496345 ±0.0164834   |
| 20F04590            | 17.0 % | 0.0086362 ±0.0002057   | 0.0097656 ±0.0055931   | 0.0219420 ±0.0065927   | 0.0284193 ±0.0056760   | 1.8496345 ±0.0164834   |
| 20F04592            | 17.0 % | 0.0085538 ±0.0001827   | 0.0138786 ±0.0054164   | 0.0264302 ±0.0067063   | 0.0302996 ±0.0063676   | 2.0027230 ±0.0156116   |
| 20F04593            | 17.0 % | 0.0085538 ±0.0001827   | 0.0138786 ±0.0054164   | 0.0264302 ±0.0067063   | 0.0302996 ±0.0063676   | 2.0027230 ±0.0156116   |
| 20F04595            | 17.0 % | 0.0085538 ±0.0001827   | 0.0138786 ±0.0054164   | 0.0264302 ±0.0067063   | 0.0302996 ±0.0063676   | 2.0027230 ±0.0156116   |
| 20F04596            | 17.0 % | 0.0085538 ±0.0001827   | 0.0138786 ±0.0054164   | 0.0264302 ±0.0067063   | 0.0302996 ±0.0063676   | 2.0027230 ±0.0156116   |

| Intercept Values |        | 36Ar ± 1σ (SE)<br>[fA] | r2     | Regression<br>(type,n) | 37Ar ± 1σ (SE)<br>[fA] | r2     | Regression<br>(type,n) | 38Ar ± 1σ (SE)<br>[fA] | r2     | Regression<br>(type,n) | 39Ar ± 1σ (SE)<br>[fA] | r2     | Regression<br>(type,n) | 40Ar ± 1σ (SE)<br>[fA] |
|------------------|--------|------------------------|--------|------------------------|------------------------|--------|------------------------|------------------------|--------|------------------------|------------------------|--------|------------------------|------------------------|
| 20F04553         | 17.0 % | 0.0133296 ±0.0003090   | 0.9896 | EXP 147 of 150         | 0.0557617 ±0.0060164   | 0.0283 | EXP 150 of 150         | 5.0950909 ±0.0070399   | 0.9827 | EXP 148 of 150         | 426.859749 ±0.024645   | 1.0000 | EXP 147 of 150         | 1534.405223 ±0.057067  |
| 20F04554         | 17.0 % | 0.0087072 ±0.0003536   | 0.9870 | EXP 150 of 150         | 0.0505829 ±0.0062745   | 0.0194 | EXP 150 of 150         | 4.8538398 ±0.0056024   | 0.9879 | EXP 148 of 150         | 405.153272 ±0.024393   | 1.0000 | EXP 150 of 150         | 1455.883484 ±0.051537  |
| 20F04556         | 17.0 % | 0.0096739 ±0.0002898   | 0.9840 | EXP 150 of 150         | 0.0257955 ±0.0058882   | 0.0044 | EXP 150 of 150         | 3.1247283 ±0.0073815   | 0.9495 | EXP 150 of 150         | 263.950369 ±0.019680   | 0.9999 | EXP 150 of 150         | 949.886553 ±0.045864   |
| 20F04557         | 17.0 % | 0.0121750 ±0.0003879   | 0.9925 | EXP 150 of 150         | 0.1139673 ±0.0054306   | 0.1021 | EXP 148 of 150         | 7.8290801 ±0.0075482   | 0.9914 | EXP 150 of 150         | 655.449414 ±0.031217   | 1.0000 | EXP 150 of 150         | 2355.243606 ±0.068591  |
| 20F04559         | 17.0 % | 0.0109164 ±0.0003517   | 0.9919 | EXP 148 of 150         | 0.1301684 ±0.0054417   | 0.0539 | EXP 150 of 150         | 6.4069059 ±0.0071046   | 0.9886 | EXP 150 of 150         | 536.630634 ±0.031292   | 1.0000 | EXP 150 of 150         | 1929.816375 ±0.059926  |
| 20F04560         | 17.0 % | 0.0081891 ±0.0003283   | 0.9878 | EXP 150 of 150         | 0.0360679 ±0.0059501   | 0.0009 | EXP 150 of 150         | 4.0417050 ±0.0067458   | 0.9743 | EXP 149 of 150         | 340.194205 ±0.021315   | 1.0000 | EXP 150 of 150         | 1222.871366 ±0.051990  |
| 20F04562         | 17.0 % | 0.0197153 ±0.0002690   | 0.9198 | EXP 150 of 150         | 1.9845763 ±0.0058673   | 0.9285 | EXP 149 of 150         | 0.1966353 ±0.0069844   | 0.0826 | EXP 150 of 150         | 18.668882 ±0.007668    | 0.9983 | EXP 150 of 150         | 69.005734 ±0.017647    |
| 20F04563         | 17.0 % | 0.3126926 ±0.0008021   | 0.7898 | EXP 149 of 150         | 0.0081114 ±0.0051122   | 0.0015 | EXP 150 of 150         | 1.7710939 ±0.0066383   | 0.8778 | EXP 149 of 150         | 146.255147 ±0.015274   | 0.9999 | EXP 150 of 150         | 633.380344 ±0.033140   |
| 20F04565         | 17.0 % | 0.0288466 ±0.0003260   | 0.9823 | EXP 148 of 150         | 0.0386528 ±0.0061104   | 0.0035 | EXP 150 of 150         | 3.8176588 ±0.0076188   | 0.9634 | EXP 150 of 150         | 320.132156 ±0.026351   | 0.9999 | EXP 150 of 150         | 1157.947323 ±0.052220  |
| 20F04566         | 17.0 % | 0.0341557 ±0.0003488   | 0.8773 | EXP 150 of 150         | 4.4746042 ±0.0066789   | 0.9797 | EXP 150 of 150         | 0.4868330 ±0.0067485   | 0.3754 | EXP 147 of 150         | 42.419386 ±0.009378    | 0.9995 | EXP 150 of 150         | 153.874947 ±0.022483   |
| 20F04568         | 17.0 % | 0.0119486 ±0.0003477   | 0.9889 | EXP 150 of 150         | 0.0640896 ±0.0057550   | 0.0466 | EXP 147 of 150         | 5.4379480 ±0.0068413   | 0.9855 | EXP 150 of 150         | 456.992246 ±0.028520   | 1.0000 | EXP 149 of 150         | 1644.246289 ±0.053548  |
| 20F04569         | 17.0 % | 0.0093700 ±0.0003749   | 0.9902 | EXP 150 of 150         | 0.0701293 ±0.0052699   | 0.0557 | EXP 149 of 150         | 5.9737077 ±0.0070698   | 0.9871 | EXP 148 of 150         | 500.990060 ±0.028707   | 1.0000 | EXP 150 of 150         | 1797.513474 ±0.061639  |
| 20F04571         | 17.0 % | 0.0092939 ±0.0003048   | 0.9895 | EXP 150 of 150         | 0.0303258 ±0.0055572   | 0.0090 | EXP 150 of 150         | 4.3875179 ±0.0069648   | 0.9770 | EXP 150 of 150         | 368.544178 ±0.022585   | 1.0000 | EXP 147 of 150         | 1325.522957 ±0.049937  |
| 20F04572         | 17.0 % | 0.0144177 ±0.0003300   | 0.9881 | EXP 149 of 150         | 0.0635269 ±0.0055086   | 0.0377 | EXP 150 of 150         | 4.4024785 ±0.0066171   | 0.9795 | EXP 148 of 150         | 368.464262 ±0.023032   | 1.0000 | EXP 150 of 150         | 1326.831152 ±0.051891  |
| 20F04574         | 17.0 % | 0.0158490 ±0.0003349   | 0.9889 | EXP 150 of 150         | 0.0561256 ±0.0058847   | 0.0117 | EXP 150 of 150         | 4.8992471 ±0.0069356   | 0.9818 | EXP 150 of 150         | 410.418242 ±0.025776   | 1.0000 | EXP 150 of 150         | 1475.629703 ±0.055227  |
| 20F04575         | 17.0 % | 0.0108498 ±0.0003406   | 0.9860 | EXP 150 of 150         | 0.0406520 ±0.0062790   | 0.0105 | EXP 150 of 150         | 3.9881252 ±0.0067983   | 0.9748 | EXP 150 of 150         | 332.792790 ±0.024938   | 0.9999 | EXP 150 of 150         | 1196.940354 ±0.047977  |
| 20F04577         | 17.0 % | 0.0098416 ±0.0002719   | 0.9860 | EXP 148 of 150         | 0.0220975 ±0.0059182   | 0.0102 | EXP 150 of 150         | 2.9198211 ±0.0069908   | 0.9499 | EXP 150 of 150         | 244.999561 ±0.019309   | 0.9999 | EXP 150 of 150         | 880.789021 ±0.042077   |
| 20F04578         | 17.0 % | 0.0083531 ±0.0002458   | 0.9884 | EXP 150 of 150         | 0.0357339 ±0.0056555   | 0.0083 | EXP 149 of 150         | 2.8530073 ±0.0067723   | 0.9502 | EXP 150 of 150         | 239.330728 ±0.021781   | 0.9999 | EXP 150 of 150         | 860.791898 ±0.043384   |
| 20F04580         | 17.0 % | 0.0170810 ±0.0002584   | 0.9271 | EXP 149 of 150         | 1.5722411 ±0.0058317   | 0.8900 | EXP 149 of 150         | 0.2937392 ±0.0063341   | 0.2491 | EXP 150 of 150         | 26.193603 ±0.008457    | 0.9990 | EXP 149 of 150         | 95.664594 ±0.021320    |
| 20F04581         | 17.0 % | 0.0211170 ±0.0002663   | 0.9187 | EXP 148 of 150         | 2.1949270 ±0.0056149   | 0.9455 | EXP 149 of 150         | 0.3726312 ±0.0061708   | 0.2393 | EXP 150 of 150         | 34.014633 ±0.008745    | 0.9994 | EXP 150 of 150         | 123.846881 ±0.021906   |
| 20F04583         | 17.0 % | 0.0133861 ±0.0003453   | 0.9817 | EXP 149 of 150         | 0.0494519 ±0.0061215   | 0.0326 | EXP 149 of 150         | 3.8255672 ±0.0064972   | 0.9729 | EXP 149 of 150         | 323.280340 ±0.023183   | 1.0000 | EXP 146 of 150         | 1163.973549 ±0.050909  |
| 20F04584         | 17.0 % | 0.0099428 ±0.0003038   | 0.9900 | EXP 149 of 150         | 0.0419430 ±0.0058919   | 0.0037 | EXP 150 of 150         | 4.6933082 ±0.0070072   | 0.9790 | EXP 148 of 150         | 396.736599 ±0.024500   | 1.0000 | EXP 150 of 150         | 1426.833590 ±0.055572  |
| 20F04586         | 17.0 % | 0.0089923 ±0.0003243   | 0.9891 | EXP 149 of 150         | 0.0513787 ±0.0062800   | 0.0202 | EXP 150 of 150         | 4.6713418 ±0.0062831   | 0.9830 | EXP 147 of 150         | 393.596242 ±0.025728   | 1.0000 | EXP 149 of 150         | 1413.847928 ±0.054954  |
| 20F04587         | 17.0 % | 0.0186055 ±0.0002832   | 0.9190 | EXP 150 of 150         | 1.6184740 ±0.0066634   | 0.8691 | EXP 150 of 150         | 0.1912952 ±0.0066411   | 0.1102 | EXP 146 of 150         | 18.385947 ±0.007506    | 0.9982 | EXP 149 of 150         | 68.264564 ±0.021125    |
| 20F04589         | 17.0 % | 0.0080723 ±0.0002843   | 0.9923 | EXP 149 of 150         | 0.0602644 ±0.0053783   | 0.0353 | EXP 150 of 150         | 5.1840893 ±0.0068968   | 0.9839 | EXP 150 of 150         | 434.418819 ±0.026297   | 1.0000 | EXP 150 of 150         | 1560.876565 ±0.054693  |
| 20F04590         | 17.0 % | 0.0110376 ±0.0003090   | 0.9889 | EXP 150 of 150         | 0.0558968 ±0.0060061   | 0.0111 | EXP 150 of 150         | 4.1767811 ±0.0065326   | 0.9769 | EXP 149 of 150         | 350.789308 ±0.024707   | 1.0000 | EXP 150 of 150         | 1262.770112 ±0.050683  |
| 20F04592         | 17.0 % | 0.0077734 ±0.0002360   | 0.9884 | EXP 147 of 150         | 0.0160640 ±0.0065043   | 0.0010 | EXP 150 of 150         | 2.6911749 ±0.0072059   | 0.9336 | EXP 150 of 150         | 227.897950 ±0.018514   | 0.9999 | EXP 150 of 150         | 819.172687 ±0.041327   |
| 20F04593         | 17.0 % | 0.0089962 ±0.0002366   | 0.9813 | EXP 150 of 150         | 0.0124104 ±0.0057677   | 0.0161 | EXP 150 of 150         | 1.5769737 ±0.0068183   | 0.8434 | EXP 150 of 150         | 133.574378 ±0.014299   | 0.9999 | EXP 149 of 150         | 480.834509 ±0.031839   |
| 20F04595         | 17.0 % | 0.0090825 ±0.0003010   | 0.9864 | EXP 149 of 150         | 0.0414597 ±0.0055852   | 0.0293 | EXP 150 of 150         | 3.7524835 ±0.0071050   | 0.9666 | EXP 150 of 150         | 315.715317 ±0.022001   | 1.0000 | EXP 150 of 150         | 1134.281389 ±0.053264  |
| 20F04596         | 17.0 % | 0.0173754 ±0.0002495   | 0.9430 | EXP 148 of 150         | 1.5097994 ±0.0060585   | 0.8747 | EXP 150 of 150         | 0.2405872 ±0.0068451   | 0.1486 | EXP 150 of 150         | 22.069345 ±0.007971    | 0.9987 | EXP 148 of 150         | 81.282606 ±0.019971    |

| r2     | Regression<br>(ttype,n) |            |
|--------|-------------------------|------------|
| 1.0000 | EXP                     | 150 of 150 |
| 1.0000 | EXP                     | 148 of 150 |
| 1.0000 | EXP                     | 150 of 150 |
| 1.0000 | EXP                     | 149 of 150 |
| 1.0000 | EXP                     | 149 of 150 |
| 1.0000 | EXP                     | 150 of 150 |
| 0.9961 | EXP                     | 149 of 150 |
| 1.0000 | EXP                     | 149 of 150 |
| 1.0000 | EXP                     | 149 of 150 |
| 0.9996 | EXP                     | 150 of 150 |
| 1.0000 | EXP                     | 150 of 150 |
| 1.0000 | EXP                     | 150 of 150 |
| 1.0000 | EXP                     | 147 of 150 |
| 1.0000 | EXP                     | 150 of 150 |
| 1.0000 | EXP                     | 146 of 150 |
| 1.0000 | EXP                     | 150 of 150 |
| 1.0000 | EXP                     | 150 of 150 |
| 1.0000 | EXP                     | 150 of 150 |
| 0.9986 | EXP                     | 150 of 150 |
| 0.9994 | EXP                     | 147 of 150 |
| 1.0000 | EXP                     | 150 of 150 |
| 1.0000 | EXP                     | 150 of 150 |
| 1.0000 | EXP                     | 150 of 150 |
| 0.9913 | EXP                     | 150 of 150 |
| 1.0000 | EXP                     | 148 of 150 |
| 1.0000 | EXP                     | 150 of 150 |
| 1.0000 | EXP                     | 150 of 150 |
| 0.9999 | EXP                     | 150 of 150 |
| 1.0000 | EXP                     | 150 of 150 |
| 0.9973 | EXP                     | 150 of 150 |

| Project Info |        | Analyst     | Irradiation | X-pos | Y-pos | Z/H-pos | Project                | Experiment | Nmb |
|--------------|--------|-------------|-------------|-------|-------|---------|------------------------|------------|-----|
| 20F04553     | 17.0 % | Dan Miggins | 19-OSU-02   | 0.00  | 0.00  | 46.24   | Oregon\Swenton (18-58) | 20F04549   | 01  |
| 20F04554     | 17.0 % | Dan Miggins | 19-OSU-02   | 0.00  | 0.00  | 46.24   | Oregon\Swenton (18-58) | 20F04549   | 01  |
| 20F04556     | 17.0 % | Dan Miggins | 19-OSU-02   | 0.00  | 0.00  | 46.24   | Oregon\Swenton (18-58) | 20F04549   | 01  |
| 20F04557     | 17.0 % | Dan Miggins | 19-OSU-02   | 0.00  | 0.00  | 46.24   | Oregon\Swenton (18-58) | 20F04549   | 01  |
| 20F04559     | 17.0 % | Dan Miggins | 19-OSU-02   | 0.00  | 0.00  | 46.24   | Oregon\Swenton (18-58) | 20F04549   | 01  |
| 20F04560     | 17.0 % | Dan Miggins | 19-OSU-02   | 0.00  | 0.00  | 46.24   | Oregon\Swenton (18-58) | 20F04549   | 01  |
| 20F04562     | 17.0 % | Dan Miggins | 19-OSU-02   | 0.00  | 0.00  | 46.24   | Oregon\Swenton (18-58) | 20F04549   | 01  |
| 20F04563     | 17.0 % | Dan Miggins | 19-OSU-02   | 0.00  | 0.00  | 46.24   | Oregon\Swenton (18-58) | 20F04549   | 01  |
| 20F04565     | 17.0 % | Dan Miggins | 19-OSU-02   | 0.00  | 0.00  | 46.24   | Oregon\Swenton (18-58) | 20F04549   | 01  |
| 20F04566     | 17.0 % | Dan Miggins | 19-OSU-02   | 0.00  | 0.00  | 46.24   | Oregon\Swenton (18-58) | 20F04549   | 01  |
| 20F04568     | 17.0 % | Dan Miggins | 19-OSU-02   | 0.00  | 0.00  | 46.24   | Oregon\Swenton (18-58) | 20F04549   | 01  |
| 20F04569     | 17.0 % | Dan Miggins | 19-OSU-02   | 0.00  | 0.00  | 46.24   | Oregon\Swenton (18-58) | 20F04549   | 01  |
| 20F04571     | 17.0 % | Dan Miggins | 19-OSU-02   | 0.00  | 0.00  | 46.24   | Oregon\Swenton (18-58) | 20F04549   | 01  |
| 20F04572     | 17.0 % | Dan Miggins | 19-OSU-02   | 0.00  | 0.00  | 46.24   | Oregon\Swenton (18-58) | 20F04549   | 01  |
| 20F04574     | 17.0 % | Dan Miggins | 19-OSU-02   | 0.00  | 0.00  | 46.24   | Oregon\Swenton (18-58) | 20F04549   | 01  |
| 20F04575     | 17.0 % | Dan Miggins | 19-OSU-02   | 0.00  | 0.00  | 46.24   | Oregon\Swenton (18-58) | 20F04549   | 01  |
| 20F04577     | 17.0 % | Dan Miggins | 19-OSU-02   | 0.00  | 0.00  | 46.24   | Oregon\Swenton (18-58) | 20F04549   | 01  |
| 20F04578     | 17.0 % | Dan Miggins | 19-OSU-02   | 0.00  | 0.00  | 46.24   | Oregon\Swenton (18-58) | 20F04549   | 01  |
| 20F04580     | 17.0 % | Dan Miggins | 19-OSU-02   | 0.00  | 0.00  | 46.24   | Oregon\Swenton (18-58) | 20F04549   | 01  |
| 20F04581     | 17.0 % | Dan Miggins | 19-OSU-02   | 0.00  | 0.00  | 46.24   | Oregon\Swenton (18-58) | 20F04549   | 01  |
| 20F04583     | 17.0 % | Dan Miggins | 19-OSU-02   | 0.00  | 0.00  | 46.24   | Oregon\Swenton (18-58) | 20F04549   | 01  |
| 20F04584     | 17.0 % | Dan Miggins | 19-OSU-02   | 0.00  | 0.00  | 46.24   | Oregon\Swenton (18-58) | 20F04549   | 01  |
| 20F04586     | 17.0 % | Dan Miggins | 19-OSU-02   | 0.00  | 0.00  | 46.24   | Oregon\Swenton (18-58) | 20F04549   | 01  |
| 20F04587     | 17.0 % | Dan Miggins | 19-OSU-02   | 0.00  | 0.00  | 46.24   | Oregon\Swenton (18-58) | 20F04549   | 01  |
| 20F04589     | 17.0 % | Dan Miggins | 19-OSU-02   | 0.00  | 0.00  | 46.24   | Oregon\Swenton (18-58) | 20F04549   | 01  |
| 20F04590     | 17.0 % | Dan Miggins | 19-OSU-02   | 0.00  | 0.00  | 46.24   | Oregon\Swenton (18-58) | 20F04549   | 01  |
| 20F04592     | 17.0 % | Dan Miggins | 19-OSU-02   | 0.00  | 0.00  | 46.24   | Oregon\Swenton (18-58) | 20F04549   | 01  |
| 20F04593     | 17.0 % | Dan Miggins | 19-OSU-02   | 0.00  | 0.00  | 46.24   | Oregon\Swenton (18-58) | 20F04549   | 01  |
| 20F04595     | 17.0 % | Dan Miggins | 19-OSU-02   | 0.00  | 0.00  | 46.24   | Oregon\Swenton (18-58) | 20F04549   | 01  |
| 20F04596     | 17.0 % | Dan Miggins | 19-OSU-02   | 0.00  | 0.00  | 46.24   | Oregon\Swenton (18-58) | 20F04549   | 01  |

OSU Argon Geochronology Lab

CEOAS Oregon State University, Corvallis, USA

| Sample Parameters |        | Sample   | Material | Location   | Standard Name    | Standard (in Ma) | %1σ   | Standard Reference  | Standard 40Ar/39Ar | %1σ   | J          | %1σ   | Air 40Ar/36Ar | %1σ   | MDF (lin) | %1σ   | Volume Ratio | Sensitivity (mol/volt) | Day | Month | Year | Hour | Min | Resist |
|-------------------|--------|----------|----------|------------|------------------|------------------|-------|---------------------|--------------------|-------|------------|-------|---------------|-------|-----------|-------|--------------|------------------------|-----|-------|------|------|-----|--------|
| 20F04553          | 17.0 % | VS17-056 | Sanidine | South Fork | FCT-NM (2C37-19) | 28.201           | 0.082 | Kuiper et al (2008) | 9.80392            | 0.241 | 0.00158360 | 0.241 | 299.164       | 0.125 | 0.9994946 | 0.041 | 1            | 3.54E-14               | 1   | APR   | 2020 | 5    | 55  | 1      |
| 20F04554          | 17.0 % | VS17-056 | Sanidine | South Fork | FCT-NM (2C37-19) | 28.201           | 0.082 | Kuiper et al (2008) | 9.80392            | 0.241 | 0.00158360 | 0.241 | 299.164       | 0.125 | 0.9994946 | 0.041 | 1            | 3.54E-14               | 1   | APR   | 2020 | 6    | 4   | 1      |
| 20F04556          | 17.0 % | VS17-056 | Sanidine | South Fork | FCT-NM (2C37-19) | 28.201           | 0.082 | Kuiper et al (2008) | 9.80392            | 0.241 | 0.00158360 | 0.241 | 299.164       | 0.125 | 0.9994946 | 0.041 | 1            | 3.54E-14               | 1   | APR   | 2020 | 6    | 21  | 1      |
| 20F04557          | 17.0 % | VS17-056 | Sanidine | South Fork | FCT-NM (2C37-19) | 28.201           | 0.082 | Kuiper et al (2008) | 9.80392            | 0.241 | 0.00158360 | 0.241 | 299.164       | 0.125 | 0.9994946 | 0.041 | 1            | 3.54E-14               | 1   | APR   | 2020 | 6    | 30  | 1      |
| 20F04559          | 17.0 % | VS17-056 | Sanidine | South Fork | FCT-NM (2C37-19) | 28.201           | 0.082 | Kuiper et al (2008) | 9.80392            | 0.241 | 0.00158360 | 0.241 | 299.164       | 0.125 | 0.9994946 | 0.041 | 1            | 3.54E-14               | 1   | APR   | 2020 | 6    | 47  | 1      |
| 20F04560          | 17.0 % | VS17-056 | Sanidine | South Fork | FCT-NM (2C37-19) | 28.201           | 0.082 | Kuiper et al (2008) | 9.80392            | 0.241 | 0.00158360 | 0.241 | 299.164       | 0.125 | 0.9994946 | 0.041 | 1            | 3.54E-14               | 1   | APR   | 2020 | 6    | 55  | 1      |
| 20F04562          | 17.0 % | VS17-056 | Sanidine | South Fork | FCT-NM (2C37-19) | 28.201           | 0.082 | Kuiper et al (2008) | 9.80392            | 0.241 | 0.00158360 | 0.241 | 299.164       | 0.125 | 0.9994946 | 0.041 | 1            | 3.54E-14               | 1   | APR   | 2020 | 7    | 12  | 1      |
| 20F04563          | 17.0 % | VS17-056 | Sanidine | South Fork | FCT-NM (2C37-19) | 28.201           | 0.082 | Kuiper et al (2008) | 9.80392            | 0.241 | 0.00158360 | 0.241 | 299.164       | 0.125 | 0.9994946 | 0.041 | 1            | 3.54E-14               | 1   | APR   | 2020 | 7    | 21  | 1      |
| 20F04565          | 17.0 % | VS17-056 | Sanidine | South Fork | FCT-NM (2C37-19) | 28.201           | 0.082 | Kuiper et al (2008) | 9.80392            | 0.241 | 0.00158360 | 0.241 | 299.164       | 0.125 | 0.9994946 | 0.041 | 1            | 3.54E-14               | 1   | APR   | 2020 | 7    | 38  | 1      |
| 20F04566          | 17.0 % | VS17-056 | Sanidine | South Fork | FCT-NM (2C37-19) | 28.201           | 0.082 | Kuiper et al (2008) | 9.80392            | 0.241 | 0.00158360 | 0.241 | 299.164       | 0.125 | 0.9994946 | 0.041 | 1            | 3.54E-14               | 1   | APR   | 2020 | 7    | 47  | 1      |
| 20F04568          | 17.0 % | VS17-056 | Sanidine | South Fork | FCT-NM (2C37-19) | 28.201           | 0.082 | Kuiper et al (2008) | 9.80392            | 0.241 | 0.00158360 | 0.241 | 299.164       | 0.125 | 0.9994946 | 0.041 | 1            | 3.54E-14               | 1   | APR   | 2020 | 8    | 4   | 1      |
| 20F04569          | 17.0 % | VS17-056 | Sanidine | South Fork | FCT-NM (2C37-19) | 28.201           | 0.082 | Kuiper et al (2008) | 9.80392            | 0.241 | 0.00158360 | 0.241 | 299.164       | 0.125 | 0.9994946 | 0.041 | 1            | 3.54E-14               | 1   | APR   | 2020 | 8    | 12  | 1      |
| 20F04571          | 17.0 % | VS17-056 | Sanidine | South Fork | FCT-NM (2C37-19) | 28.201           | 0.082 | Kuiper et al (2008) | 9.80392            | 0.241 | 0.00158360 | 0.241 | 299.164       | 0.125 | 0.9994946 | 0.041 | 1            | 3.54E-14               | 1   | APR   | 2020 | 8    | 30  | 1      |
| 20F04572          | 17.0 % | VS17-056 | Sanidine | South Fork | FCT-NM (2C37-19) | 28.201           | 0.082 | Kuiper et al (2008) | 9.80392            | 0.241 | 0.00158360 | 0.241 | 299.164       | 0.125 | 0.9994946 | 0.041 | 1            | 3.54E-14               | 1   | APR   | 2020 | 8    | 38  | 1      |
| 20F04574          | 17.0 % | VS17-056 | Sanidine | South Fork | FCT-NM (2C37-19) | 28.201           | 0.082 | Kuiper et al (2008) | 9.80392            | 0.241 | 0.00158360 | 0.241 | 299.164       | 0.125 | 0.9994946 | 0.041 | 1            | 3.54E-14               | 1   | APR   | 2020 | 8    | 55  | 1      |
| 20F04575          | 17.0 % | VS17-056 | Sanidine | South Fork | FCT-NM (2C37-19) | 28.201           | 0.082 | Kuiper et al (2008) | 9.80392            | 0.241 | 0.00158360 | 0.241 | 299.164       | 0.125 | 0.9994946 | 0.041 | 1            | 3.54E-14               | 1   | APR   | 2020 | 9    | 4   | 1      |
| 20F04577          | 17.0 % | VS17-056 | Sanidine | South Fork | FCT-NM (2C37-19) | 28.201           | 0.082 | Kuiper et al (2008) | 9.80392            | 0.241 | 0.00158360 | 0.241 | 299.164       | 0.125 | 0.9994946 | 0.041 | 1            | 3.54E-14               | 1   | APR   | 2020 | 9    | 21  | 1      |
| 20F04578          | 17.0 % | VS17-056 | Sanidine | South Fork | FCT-NM (2C37-19) | 28.201           | 0.082 | Kuiper et al (2008) | 9.80392            | 0.241 | 0.00158360 | 0.241 | 299.164       | 0.125 | 0.9994946 | 0.041 | 1            | 3.54E-14               | 1   | APR   | 2020 | 9    | 29  | 1      |
| 20F04580          | 17.0 % | VS17-056 | Sanidine | South Fork | FCT-NM (2C37-19) | 28.201           | 0.082 | Kuiper et al (2008) | 9.80392            | 0.241 | 0.00158360 | 0.241 | 299.164       | 0.125 | 0.9994946 | 0.041 | 1            | 3.54E-14               | 1   | APR   | 2020 | 9    | 47  | 1      |
| 20F04581          | 17.0 % | VS17-056 | Sanidine | South Fork | FCT-NM (2C37-19) | 28.201           | 0.082 | Kuiper et al (2008) | 9.80392            | 0.241 | 0.00158360 | 0.241 | 299.164       | 0.125 | 0.9994946 | 0.041 | 1            | 3.54E-14               | 1   | APR   | 2020 | 9    | 55  | 1      |
| 20F04583          | 17.0 % | VS17-056 | Sanidine | South Fork | FCT-NM (2C37-19) | 28.201           | 0.082 | Kuiper et al (2008) | 9.80392            | 0.241 | 0.00158360 | 0.241 | 299.164       | 0.125 | 0.9994946 | 0.041 | 1            | 3.54E-14               | 1   | APR   | 2020 | 10   | 12  | 1      |
| 20F04584          | 17.0 % | VS17-056 | Sanidine | South Fork | FCT-NM (2C37-19) | 28.201           | 0.082 | Kuiper et al (2008) | 9.80392            | 0.241 | 0.00158360 | 0.241 | 299.164       | 0.125 | 0.9994946 | 0.041 | 1            | 3.54E-14               | 1   | APR   | 2020 | 10   | 21  | 1      |
| 20F04586          | 17.0 % | VS17-056 | Sanidine | South Fork | FCT-NM (2C37-19) | 28.201           | 0.082 | Kuiper et al (2008) | 9.80392            | 0.241 | 0.00158360 | 0.241 | 299.164       | 0.125 | 0.9994946 | 0.041 | 1            | 3.54E-14               | 1   | APR   | 2020 | 10   | 38  | 1      |
| 20F04587          | 17.0 % | VS17-056 | Sanidine | South Fork | FCT-NM (2C37-19) | 28.201           | 0.082 | Kuiper et al (2008) | 9.80392            | 0.241 | 0.00158360 | 0.241 | 299.164       | 0.125 | 0.9994946 | 0.041 | 1            | 3.54E-14               | 1   | APR   | 2020 | 10   | 47  | 1      |
| 20F04589          | 17.0 % | VS17-056 | Sanidine | South Fork | FCT-NM (2C37-19) | 28.201           | 0.082 | Kuiper et al (2008) | 9.80392            | 0.241 | 0.00158360 | 0.241 | 299.164       | 0.125 | 0.9994946 | 0.041 | 1            | 3.54E-14               | 1   | APR   | 2020 | 11   | 4   | 1      |
| 20F04590          | 17.0 % | VS17-056 | Sanidine | South Fork | FCT-NM (2C37-19) | 28.201           | 0.082 | Kuiper et al (2008) | 9.80392            | 0.241 | 0.00158360 | 0.241 | 299.164       | 0.125 | 0.9994946 | 0.041 | 1            | 3.54E-14               | 1   | APR   | 2020 | 11   | 12  | 1      |
| 20F04592          | 17.0 % | VS17-056 | Sanidine | South Fork | FCT-NM (2C37-19) | 28.201           | 0.082 | Kuiper et al (2008) | 9.80392            | 0.241 | 0.00158360 | 0.241 | 299.164       | 0.125 | 0.9994946 | 0.041 | 1            | 3.54E-14               | 1   | APR   | 2020 | 11   | 29  | 1      |
| 20F04593          | 17.0 % | VS17-056 | Sanidine | South Fork | FCT-NM (2C37-19) | 28.201           | 0.082 | Kuiper et al (2008) | 9.80392            | 0.241 | 0.00158360 | 0.241 | 299.164       | 0.125 | 0.9994946 | 0.041 | 1            | 3.54E-14               | 1   | APR   | 2020 | 11   | 38  | 1      |
| 20F04595          | 17.0 % | VS17-056 | Sanidine | South Fork | FCT-NM (2C37-19) | 28.201           | 0.082 | Kuiper et al (2008) | 9.80392            | 0.241 | 0.00158360 | 0.241 | 299.164       | 0.125 | 0.9994946 | 0.041 | 1            | 3.54E-14               | 1   | APR   | 2020 | 11   | 55  | 1      |
| 20F04596          | 17.0 % | VS17-056 | Sanidine | South Fork | FCT-NM (2C37-19) | 28.201           | 0.082 | Kuiper et al (2008) | 9.80392            | 0.241 | 0.00158360 | 0.241 | 299.164       | 0.125 | 0.9994946 | 0.041 | 1            | 3.54E-14               | 1   | APR   | 2020 | 12   | 4   | 1      |



20F04549.AGE >>> VS17-056 >>> OREGON | SWENTON (18-58) PROJECT

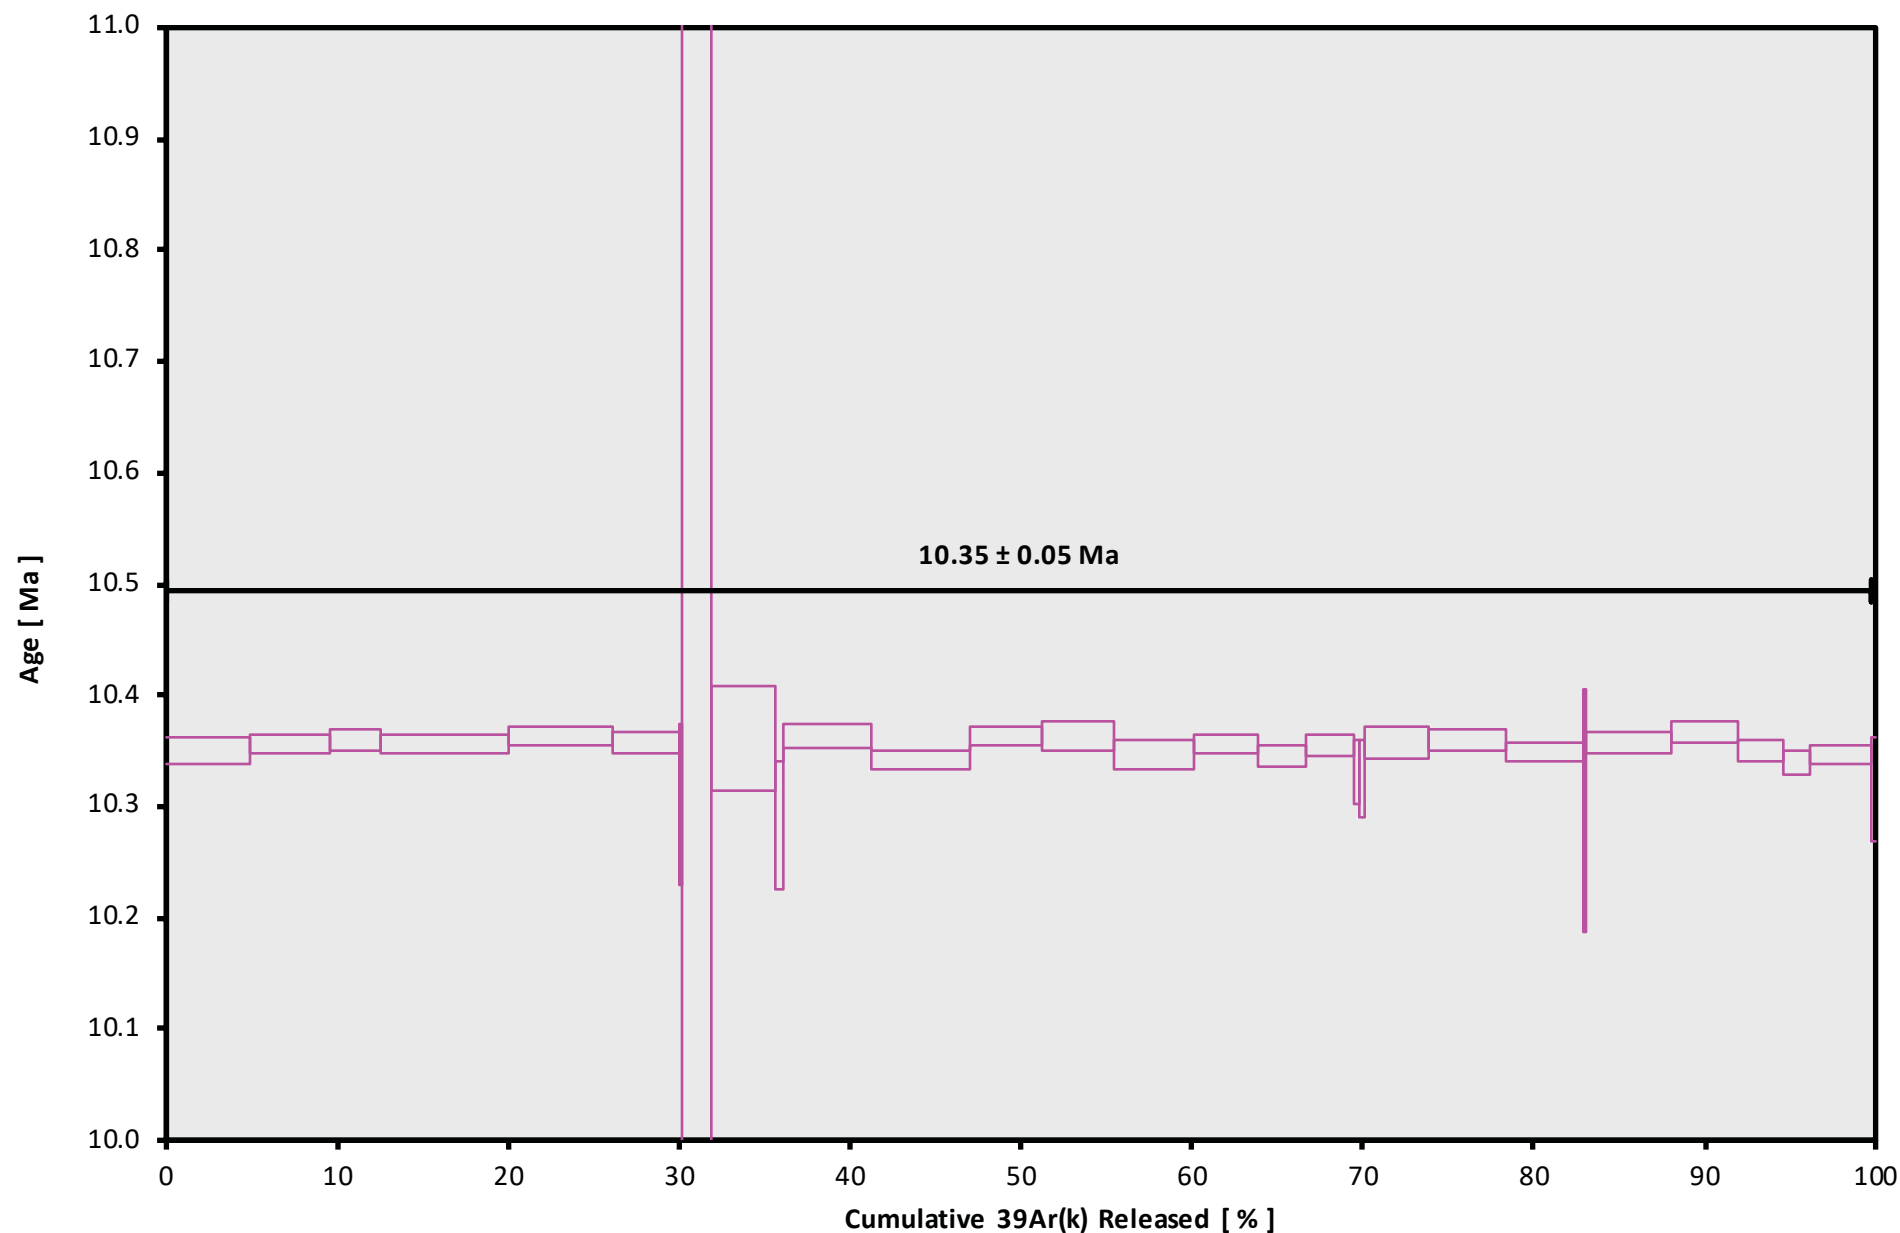

Ar-Ages in Ma

WEIGHTED PLATEAU

10.35  $\pm$  0.05

TOTAL FUSION

10.36  $\pm$  0.06

NORMAL ISOCHRON

10.36  $\pm$  0.05

INVERSE ISOCHRON

10.35  $\pm$  0.05

MSWD (PROBABILITY)

2.36 (0%)

Sample Info

Sanidine

South Fork

Dan Miggins

IRR = 19-OSU-02 (2C37-



20F04549.AGE >>> VS17-056 >>> OREGON | SWENTON (18-58) PROJECT

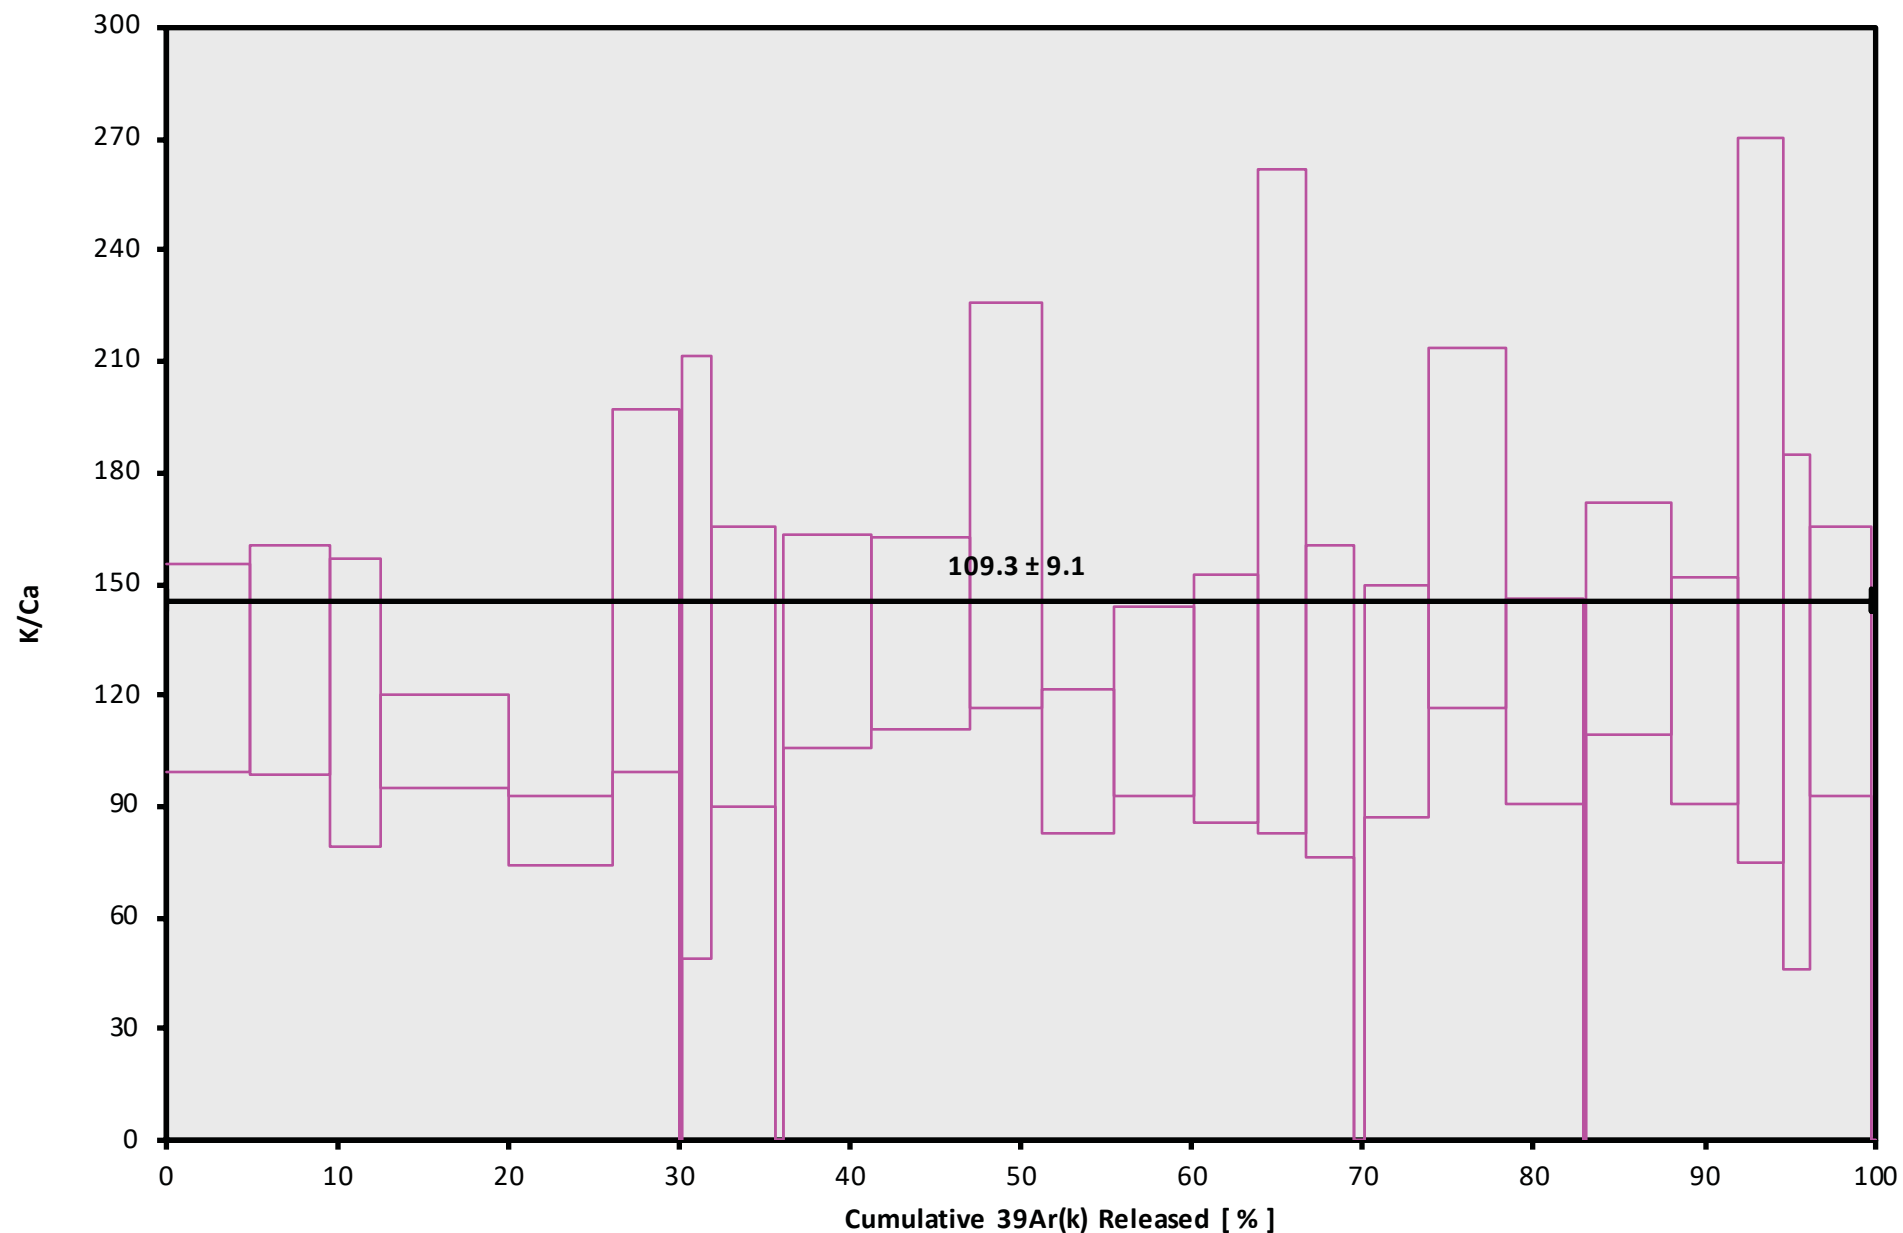

Ar-Ages in Ma

WEIGHTED PLATEAU

$10.35 \pm 0.05$

TOTAL FUSION

$10.36 \pm 0.06$

NORMAL ISOCHRON

$10.36 \pm 0.05$

INVERSE ISOCHRON

$10.35 \pm 0.05$

Sample Info

Sanidine

South Fork

Dan Miggins

IRR = 19-OSU-02 (2C37-

20F04549.AGE >>> VS17-056 >>> OREGON | SWENTON (18-58) PROJECT

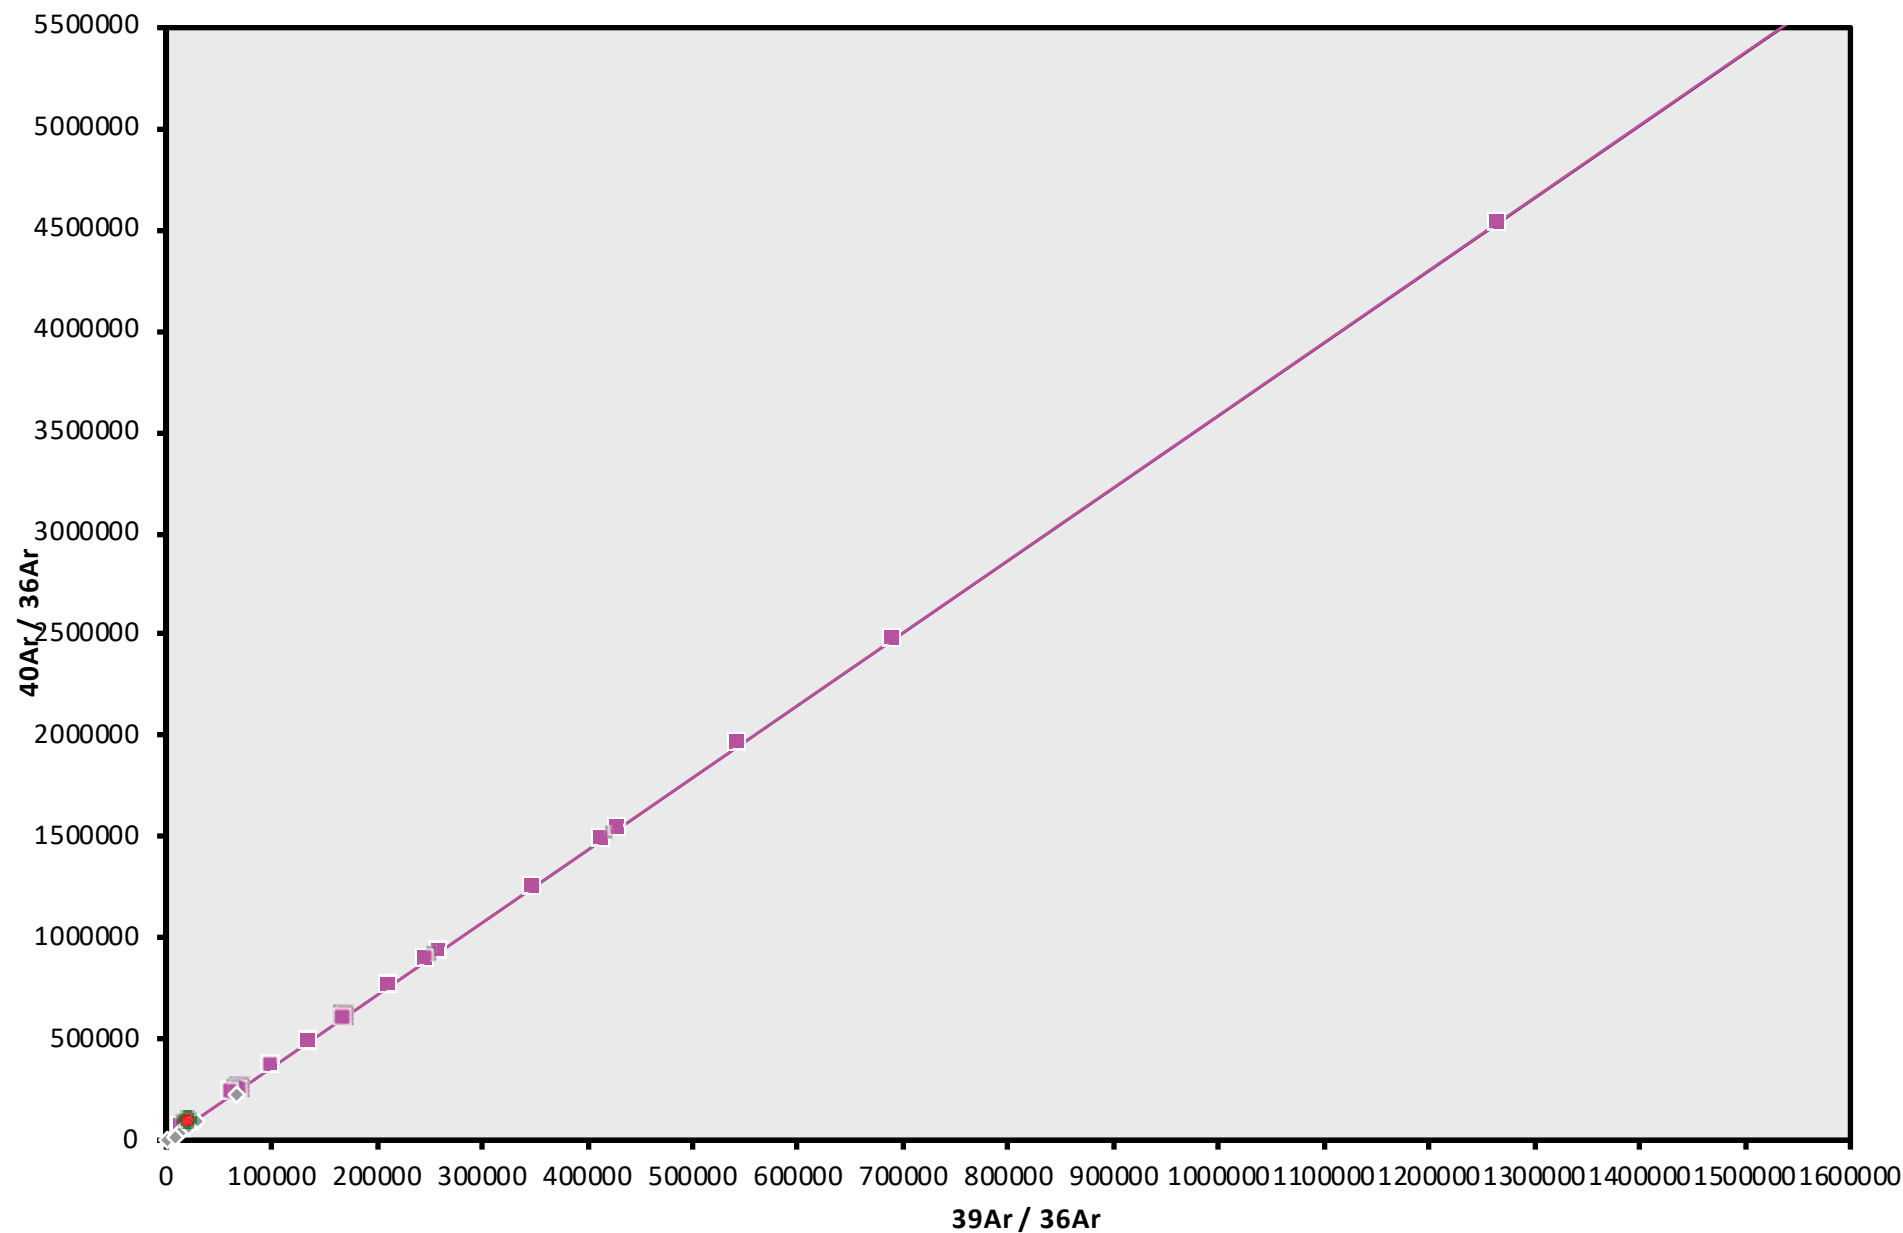

Ar-Ages in Ma

WEIGHTED PLATEAU

$10.35 \pm 0.05$

TOTAL FUSION

$10.36 \pm 0.06$

NORMAL ISOCHRON

$10.36 \pm 0.05$

INVERSE ISOCHRON

$10.35 \pm 0.05$

MSWD (PROBABILITY)

2.58 (0%)

$^{40}\text{Ar}/^{36}\text{Ar}$  INTERCEPT

Sample Info

Sanidine

South Fork

Dan Miggins

IRR = 19-OSU-02 (2C37-

20F04549.AGE >>> VS17-056 >>> OREGON | SWENTON (18-58) PROJECT

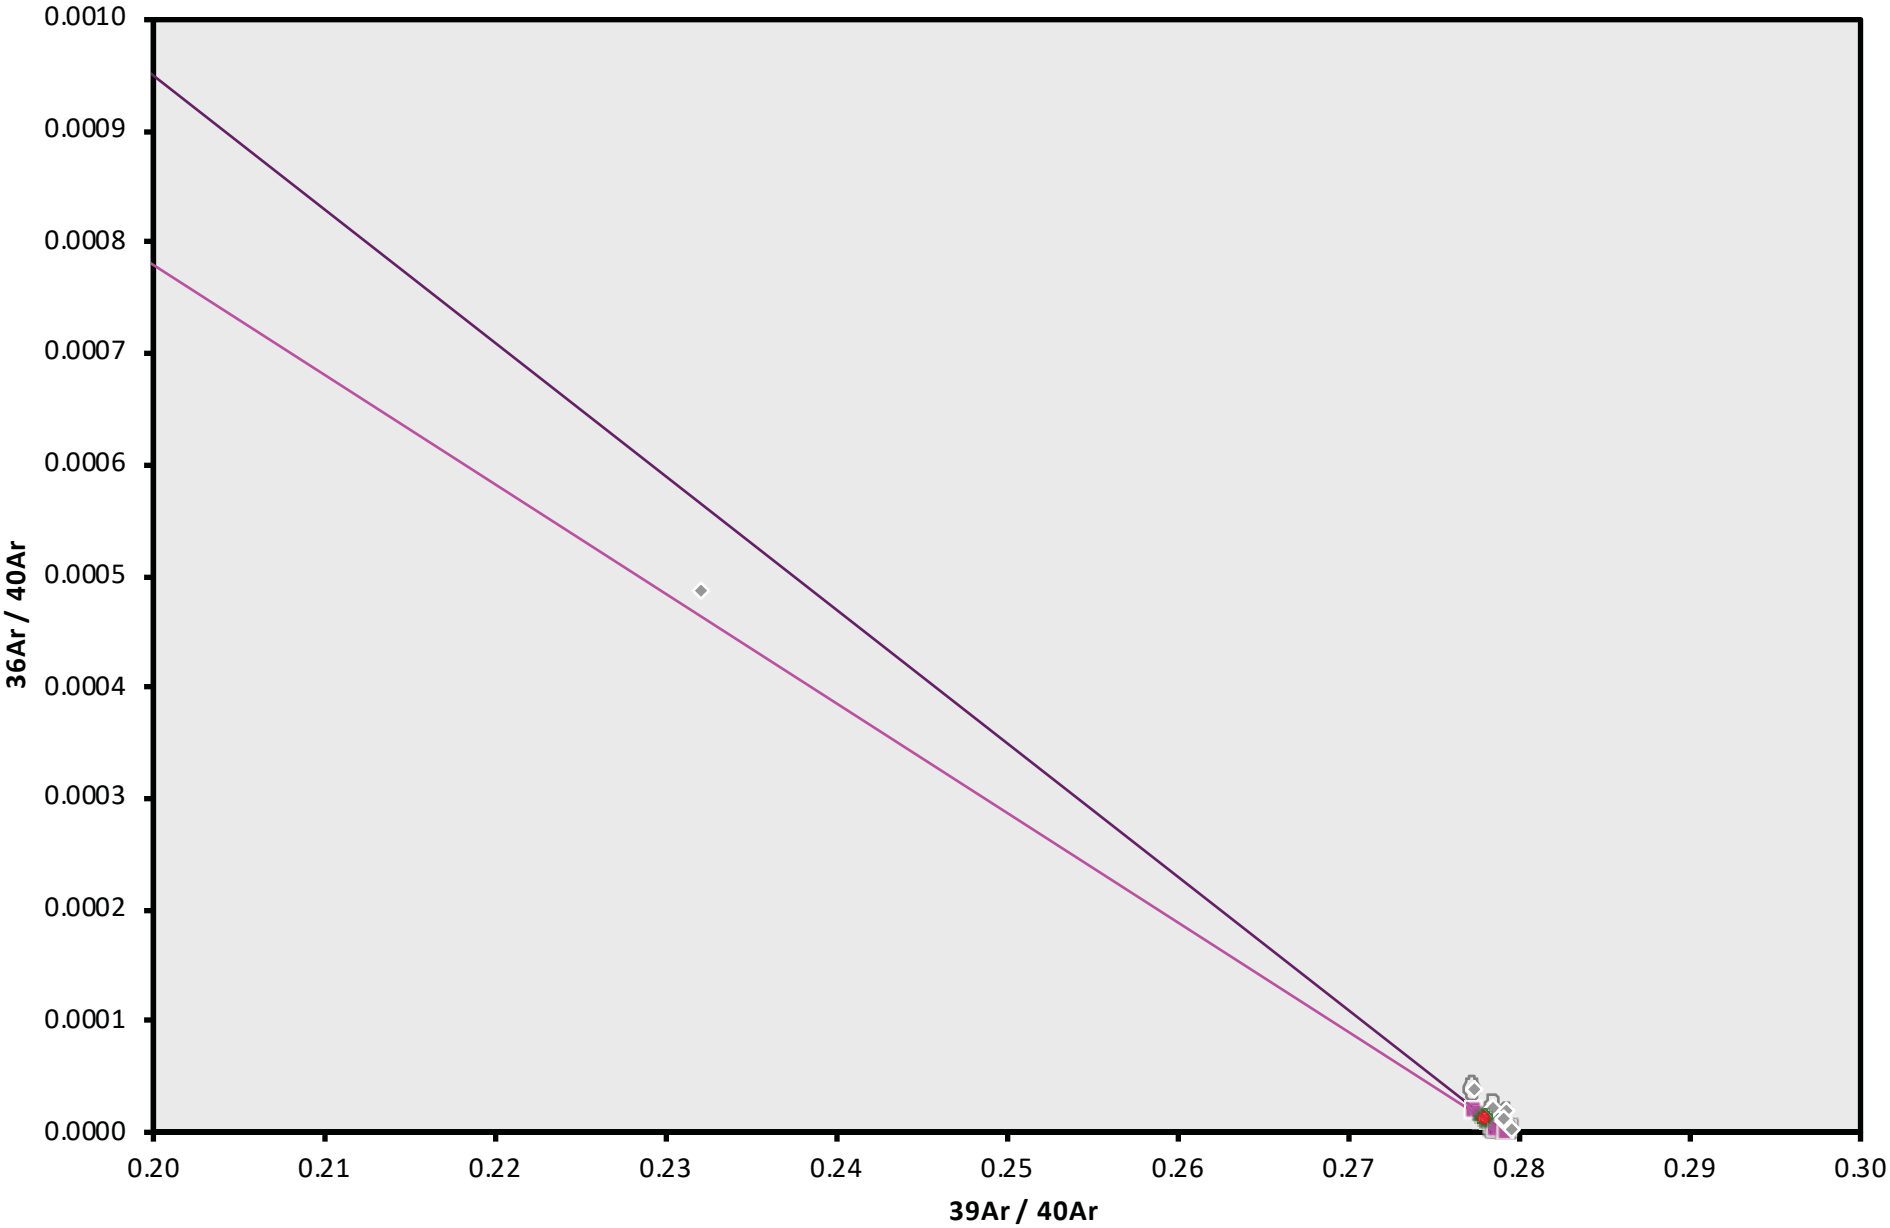

Ar-Ages in Ma

WEIGHTED PLATEAU

$10.35 \pm 0.05$

TOTAL FUSION

$10.36 \pm 0.06$

NORMAL ISOCHRON

$10.36 \pm 0.05$

INVERSE ISOCHRON

$10.35 \pm 0.05$

MSWD (PROBABILITY)

2.84 (0%)

SPREADING FACTOR

Sample Info

Sanidine

South Fork

Dan Miggins

IRR = 19-OSU-02 (2C37-

| Relative Abundances |        |   | 36Ar<br>[fA] | %1σ    | 37Ar<br>[fA] | %1σ   | 38Ar<br>[fA] | %1σ   | 39Ar<br>[fA] | %1σ   | 40Ar<br>[fA] | %1σ   | 40(r)/39(k) ± 2σ | Age ± 2σ<br>(Ma) | 40Ar(r)<br>(%) | 39Ar(k)<br>(%) | K/Ca ± 2σ |
|---------------------|--------|---|--------------|--------|--------------|-------|--------------|-------|--------------|-------|--------------|-------|------------------|------------------|----------------|----------------|-----------|
| 20F04604            | 17.0 % | ✓ | 0.0062541    | 6.272  | 3.16730      | 4.638 | 2.633679     | 0.369 | 219.2315     | 0.042 | 905.004      | 0.005 | 4.12015 ±0.00364 | 11.87 ±0.01      | 99.81          | 2.75           | 29.8 ±2.8 |
| 20F04605            | 17.0 % |   | 5.8326759    | 0.174  | 4.00075      | 3.867 | 4.816372     | 0.226 | 306.7342     | 0.042 | 2995.098     | 0.002 | 4.08772 ±0.02332 | 11.77 ±0.07      | 41.86          | 3.85           | 33.0 ±2.5 |
| 20F04607            | 17.0 % | ✓ | 0.1217749    | 0.592  | 6.23678      | 2.506 | 5.120201     | 0.202 | 424.3418     | 0.042 | 1781.733     | 0.003 | 4.11376 ±0.00359 | 11.85 ±0.01      | 97.97          | 5.33           | 29.3 ±1.5 |
| 20F04608            | 17.0 % | ✓ | 0.0294963    | 1.651  | 5.77047      | 2.774 | 4.730328     | 0.214 | 392.8164     | 0.042 | 1626.763     | 0.004 | 4.11948 ±0.00352 | 11.86 ±0.01      | 99.47          | 4.93           | 29.3 ±1.6 |
| 20F04610            | 17.0 % | ✓ | 0.0264239    | 1.807  | 4.92636      | 3.260 | 4.548860     | 0.218 | 377.7594     | 0.042 | 1563.936     | 0.003 | 4.11963 ±0.00353 | 11.87 ±0.01      | 99.51          | 4.74           | 33.0 ±2.2 |
| 20F04611            | 17.0 % | ✓ | 0.0027070    | 14.183 | 3.98328      | 4.046 | 3.539289     | 0.262 | 295.8564     | 0.042 | 1219.258     | 0.004 | 4.11890 ±0.00355 | 11.86 ±0.01      | 99.95          | 3.71           | 31.9 ±2.6 |
| 20F04613            | 17.0 % | ✓ | 0.0243288    | 1.760  | 4.89577      | 3.294 | 3.805587     | 0.253 | 314.1571     | 0.042 | 1300.333     | 0.004 | 4.11669 ±0.00355 | 11.86 ±0.01      | 99.46          | 3.94           | 27.6 ±1.8 |
| 20F04614            | 17.0 % | ✓ | 0.0553837    | 0.996  | 7.78216      | 2.103 | 5.865828     | 0.184 | 489.9141     | 0.042 | 2032.251     | 0.003 | 4.11514 ±0.00350 | 11.85 ±0.01      | 99.20          | 6.15           | 27.1 ±1.1 |
| 20F04616            | 17.0 % | ✓ | 0.0197151    | 2.165  | 3.37180      | 4.650 | 3.102813     | 0.341 | 258.5390     | 0.042 | 1068.139     | 0.005 | 4.10916 ±0.00361 | 11.84 ±0.01      | 99.46          | 3.25           | 33.0 ±3.1 |
| 20F04617            | 17.0 % | ✓ | 0.0056815    | 6.159  | 2.67491      | 5.979 | 2.593395     | 0.390 | 215.8330     | 0.042 | 889.046      | 0.005 | 4.11171 ±0.00363 | 11.84 ±0.01      | 99.82          | 2.71           | 34.7 ±4.1 |
| 20F04619            | 17.0 % | ✓ | 0.2071740    | 0.396  | 5.06344      | 2.878 | 4.168996     | 0.246 | 346.2063     | 0.042 | 1487.232     | 0.004 | 4.11775 ±0.00375 | 11.86 ±0.01      | 95.85          | 4.35           | 29.4 ±1.7 |
| 20F04620            | 17.0 % | ✓ | 0.0072833    | 5.445  | 3.31275      | 4.737 | 2.821916     | 0.352 | 234.4810     | 0.042 | 966.634      | 0.005 | 4.11374 ±0.00363 | 11.85 ±0.01      | 99.79          | 2.94           | 30.4 ±2.9 |
| 20F04622            | 17.0 % | ✓ | 0.0133277    | 2.967  | 5.53988      | 2.999 | 4.114799     | 0.242 | 341.7343     | 0.042 | 1408.722     | 0.004 | 4.11137 ±0.00352 | 11.84 ±0.01      | 99.73          | 4.29           | 26.5 ±1.6 |
| 20F04623            | 17.0 % | ✓ | 0.0032697    | 11.862 | 5.01443      | 3.209 | 4.232787     | 0.219 | 353.8476     | 0.042 | 1456.982     | 0.004 | 4.11536 ±0.00351 | 11.85 ±0.01      | 99.95          | 4.44           | 30.3 ±1.9 |
| 20F04625            | 17.0 % | ✓ | 0.0108005    | 3.545  | 2.26202      | 7.388 | 1.667112     | 0.542 | 140.0233     | 0.043 | 579.516      | 0.007 | 4.11642 ±0.00393 | 11.86 ±0.01      | 99.46          | 1.76           | 26.6 ±3.9 |
| 20F04626            | 17.0 % | ✓ | 0.0505467    | 0.852  | 3.26106      | 5.090 | 2.352578     | 0.410 | 194.8832     | 0.042 | 816.134      | 0.006 | 4.11116 ±0.00375 | 11.84 ±0.01      | 98.17          | 2.45           | 25.7 ±2.6 |
| 20F04628            | 17.0 % | ✓ | 0.0019698    | 19.129 | 3.41152      | 4.796 | 2.650336     | 0.336 | 220.5484     | 0.042 | 907.475      | 0.005 | 4.11265 ±0.00365 | 11.85 ±0.01      | 99.95          | 2.77           | 27.8 ±2.7 |
| 20F04629            | 17.0 % | ✓ | 0.0040007    | 9.045  | 2.27772      | 7.462 | 1.946264     | 0.434 | 163.2119     | 0.042 | 673.354      | 0.006 | 4.11888 ±0.00378 | 11.86 ±0.01      | 99.84          | 2.05           | 30.8 ±4.6 |
| 20F04631            | 17.0 % | ✓ | 0.0205989    | 1.970  | 2.66851      | 5.816 | 2.433718     | 0.413 | 200.8196     | 0.042 | 831.715      | 0.005 | 4.11148 ±0.00371 | 11.84 ±0.01      | 99.27          | 2.52           | 32.4 ±3.8 |
| 20F04632            | 17.0 % | ✓ | 0.0208986    | 1.902  | 2.57270      | 5.924 | 2.349642     | 0.439 | 196.5378     | 0.042 | 814.933      | 0.006 | 4.11518 ±0.00372 | 11.85 ±0.01      | 99.25          | 2.47           | 32.8 ±3.9 |
| 20F04634            | 17.0 % | ✓ | 0.0020034    | 15.469 | 1.83642      | 9.024 | 1.510250     | 0.640 | 125.9688     | 0.043 | 517.805      | 0.007 | 4.11594 ±0.00389 | 11.85 ±0.01      | 100.13         | 1.58           | 29.5 ±5.3 |
| 20F04635            | 17.0 % | ✓ | 0.0053572    | 6.916  | 2.21205      | 7.171 | 1.829209     | 0.534 | 153.1958     | 0.043 | 632.199      | 0.006 | 4.11690 ±0.00384 | 11.86 ±0.01      | 99.76          | 1.92           | 29.8 ±4.3 |
| 20F04637            | 17.0 % | ✓ | 0.0177183    | 2.340  | 3.97284      | 3.883 | 3.415994     | 0.286 | 284.5572     | 0.042 | 1174.229     | 0.004 | 4.10848 ±0.00356 | 11.83 ±0.01      | 99.56          | 3.57           | 30.8 ±2.4 |
| 20F04638            | 17.0 % |   | 0.3529049    | 0.295  | 3.47640      | 4.168 | 3.060205     | 0.303 | 250.2170     | 0.042 | 1148.820     | 0.005 | 4.17076 ±0.00440 | 12.01 ±0.01      | 90.84          | 3.14           | 30.9 ±2.6 |
| 20F04640            | 17.0 % | ✓ | 0.0773488    | 0.731  | 3.61370      | 4.300 | 2.940629     | 0.322 | 243.3310     | 0.042 | 1024.902     | 0.004 | 4.11769 ±0.00376 | 11.86 ±0.01      | 97.76          | 3.05           | 29.0 ±2.5 |
| 20F04641            | 17.0 % | ✓ | 0.0125021    | 3.017  | 3.24288      | 4.888 | 2.783450     | 0.319 | 232.2014     | 0.042 | 959.072      | 0.005 | 4.11483 ±0.00362 | 11.85 ±0.01      | 99.62          | 2.92           | 30.8 ±3.0 |
| 20F04643            | 17.0 % | ✓ | 0.0109944    | 4.256  | 4.49269      | 3.896 | 3.184765     | 0.314 | 265.5819     | 0.042 | 1096.505     | 0.005 | 4.11713 ±0.00364 | 11.86 ±0.01      | 99.72          | 3.33           | 25.4 ±2.0 |
| 20F04644            | 17.0 % | ✓ | 0.0230176    | 1.968  | 4.45639      | 3.687 | 3.365668     | 0.288 | 279.6102     | 0.042 | 1156.163     | 0.004 | 4.11105 ±0.00359 | 11.84 ±0.01      | 99.42          | 3.51           | 27.0 ±2.0 |
| 20F04646            | 17.0 % | ✓ | 0.4635907    | 0.275  | 3.52566      | 4.697 | 2.699830     | 0.335 | 218.9315     | 0.042 | 1040.242     | 0.004 | 4.11998 ±0.00510 | 11.87 ±0.01      | 86.71          | 2.75           | 26.7 ±2.5 |
| 20F04647            | 17.0 % | ✓ | 0.0180171    | 2.590  | 3.85617      | 4.104 | 2.667503     | 0.322 | 224.4819     | 0.042 | 930.049      | 0.005 | 4.11995 ±0.00371 | 11.87 ±0.01      | 99.44          | 2.82           | 25.0 ±2.1 |
| Σ                   |        |   | 7.4437587    | 0.142  | 116.87881    | 0.749 | 96.952004    | 0.055 | 7965.5529    | 0.008 | 35004.246    | 0.001 |                  |                  |                |                |           |

| Information on Analysis<br>and Constants Used in Calculations                                                                                                                                                                                                                                                                                                                                                                                                                                                                                                                                                                                                                                                                                                                                                                                                                                                                                                                                                                   |
|---------------------------------------------------------------------------------------------------------------------------------------------------------------------------------------------------------------------------------------------------------------------------------------------------------------------------------------------------------------------------------------------------------------------------------------------------------------------------------------------------------------------------------------------------------------------------------------------------------------------------------------------------------------------------------------------------------------------------------------------------------------------------------------------------------------------------------------------------------------------------------------------------------------------------------------------------------------------------------------------------------------------------------|
| Project = <b>SWENTON (18-58)</b><br>Sample = <b>VS17-065</b><br>Material = <b>Sanidine</b><br>Location = <b>Sacramento Butte</b><br>Region = <b>Eastern Oregon</b><br>Analyst = <b>Dan Miggins</b><br>Irradiation = <b>19-OSU-02 (2C38-19)</b><br>Position = <b>X: 0   Y: 0   Z/H: 47.67272 mm</b><br>FCT-NM Age = <b>28.201 ±0.023 Ma</b><br>FCT-NM Reference = <b>Kuiper et al (2008)</b><br>FCT-NM 40Ar/39Ar Ratio = <b>9.83531 ±0.02360</b><br>FCT-NMJ-value = <b>0.00157855 ±0.00000379</b><br>Air Shot 40Ar/36Ar = <b>299.2090 ±0.3830</b><br>Air Shot MDF = <b>0.99945704 ±0.00041195 (LIN)</b><br>Experiment Type = <b>Total Fusion</b><br>Extraction Method = <b>Single Crystal Laser Heating</b><br>Heating = <b>62 sec</b><br>Isolation = <b>1.62 min</b><br>Instrument = <b>ARGUS-VI-F</b><br>Preferred Age = <b>Ideogram Age</b><br>Age Classification = <b>Eruption Age</b><br>IGSN = <b>Undefined</b><br>Rock Class = <b>Undefined</b><br>Lithology = <b>Undefined</b><br>Lat-Lon = <b>Undefined - Undefined</b> |

Age Equations = **Min et al. (2000)**  
Negative Intensities = **Allowed**  
Collector Calibrations = **36Ar**  
Decay 40K = **5.463 ±0.107 E-10 1/a**  
Decay 39Ar = **2.940 ±0.016 E-07 1/h**  
Decay 37Ar = **8.230 ±0.012 E-04 1/h**  
Decay 36Cl = **2.257 ±0.015 E-06 1/a**  
Decay 40K(EC,β<sup>+</sup>) = **0.580 ±0.014 E-10 1/a**  
Decay 40K(β<sup>-</sup>) = **4.884 ±0.099 E-10 1/a**  
Atmospheric 40/36(a) = **298.56 ±0.31**  
Atmospheric 38/36(a) = **0.1885 ±0.0003**  
Production 39/37(ca) = **0.0006425 ±0.0000059**  
Production 38/37(ca) = **0.0001800 ±0.0000173**  
Production 36/37(ca) = **0.0002703 ±0.0000005**  
Production 40/39(k) = **0.000607 ±0.000059**  
Production 38/39(k) = **0.012077 ±0.000011**  
Production 36/38(cl) = **262.80 ±1.71**  
Scaling Ratio K/Ca = **0.430**  
Abundance Ratio 40K/K = **1.1700 ±0.0100 E-04**  
Atomic Weight K = **39.0983 ±0.0001 g**

| Results                         | 40(a)/36(a) ± 2σ    | 40(r)/39(k) ± 2σ        | Age ± 2σ<br>(Ma)   | M\$WD                                  | 39Ar(k)<br>(%,n)                                                                       | K/Ca ± 2σ |
|---------------------------------|---------------------|-------------------------|--------------------|----------------------------------------|----------------------------------------------------------------------------------------|-----------|
| Age Plateau<br>Error Mean       |                     | 4.11527 ±0.00131 ±0.03% | 11.85 ±0.06 ±0.48% | 3.55 0% 1.54 1.8829                    | 93.01 28 2σ Confidence Limit Error Magnification                                       | 28.6 ±0.9 |
| Total Fusion Age                |                     | 4.11607 ±0.00113 ±0.03% | 11.86 ±0.06 ±0.48% |                                        | 30 2σ Confidence Limit Error Magnification                                             | 29.3 ±0.4 |
| Normal Isochron<br>Error Chron  | 300.24 ±4.26 ±1.42% | 4.11536 ±0.00144 ±0.04% | 11.85 ±0.06 ±0.48% | 3.54 0% 1.55 1.8803 1 0.0000000107     | 93.01 28 2σ Confidence Limit Error Magnification Number of Iterations Convergence      |           |
| Inverse Isochron<br>Error Chron | 300.77 ±4.26 ±1.42% | 4.11498 ±0.00143 ±0.03% | 11.85 ±0.06 ±0.48% | 3.54 0% 1.55 1.8823 2 0.0000025084 14% | 93.01 28 2σ Confidence Limit Error Magnification Number of Iterations Spreading Factor |           |

| Incremental Heating |        |   | 36Ar(a)<br>[fA] | 37Ar(ca)<br>[fA] | 38Ar(cl)<br>[fA] | 39Ar(k)<br>[fA] | 40Ar(r)<br>[fA] | Age ± 2σ<br>(Ma) | 40Ar(r)<br>(%) | 39Ar(k)<br>(%) | K/Ca ± 2σ |
|---------------------|--------|---|-----------------|------------------|------------------|-----------------|-----------------|------------------|----------------|----------------|-----------|
| 20F04604            | 17.0 % | ✓ | 0.0053980       | 3.16730          | 0.0000000        | 219.2294        | 903.259         | 11.87 ±0.01      | 99.81          | 2.75           | 29.8 ±2.8 |
| 20F04605            | 17.0 % |   | 5.8315916       | 4.00075          | 0.0119995        | 306.7316        | 1253.831        | 11.77 ±0.07      | 41.86          | 3.85           | 33.0 ±2.5 |
| 20F04607            | 17.0 % | ✓ | 0.1200891       | 6.23678          | 0.0000000        | 424.3377        | 1745.622        | 11.85 ±0.01      | 97.97          | 5.33           | 29.3 ±1.5 |
| 20F04608            | 17.0 % | ✓ | 0.0279365       | 5.77047          | 0.0000000        | 392.8127        | 1618.184        | 11.86 ±0.01      | 99.47          | 4.93           | 29.3 ±1.6 |
| 20F04610            | 17.0 % | ✓ | 0.0250923       | 4.92636          | 0.0000000        | 377.7562        | 1556.215        | 11.87 ±0.01      | 99.51          | 4.74           | 33.0 ±2.2 |
| 20F04611            | 17.0 % | ✓ | 0.0016303       | 3.98328          | 0.0000000        | 295.8539        | 1218.592        | 11.86 ±0.01      | 99.95          | 3.71           | 31.9 ±2.6 |
| 20F04613            | 17.0 % | ✓ | 0.0230039       | 4.89577          | 0.0063330        | 314.1539        | 1293.274        | 11.86 ±0.01      | 99.46          | 3.94           | 27.6 ±1.8 |
| 20F04614            | 17.0 % | ✓ | 0.0532801       | 7.78216          | 0.0000000        | 489.9091        | 2016.046        | 11.85 ±0.01      | 99.20          | 6.15           | 27.1 ±1.1 |
| 20F04616            | 17.0 % | ✓ | 0.0188037       | 3.37180          | 0.0000000        | 258.5369        | 1062.368        | 11.84 ±0.01      | 99.46          | 3.25           | 33.0 ±3.1 |
| 20F04617            | 17.0 % | ✓ | 0.0049584       | 2.67491          | 0.0000000        | 215.8313        | 887.435         | 11.84 ±0.01      | 99.82          | 2.71           | 34.7 ±4.1 |
| 20F04619            | 17.0 % | ✓ | 0.2058053       | 5.06344          | 0.0000000        | 346.2030        | 1425.577        | 11.86 ±0.01      | 95.85          | 4.35           | 29.4 ±1.7 |
| 20F04620            | 17.0 % | ✓ | 0.0063878       | 3.31275          | 0.0000000        | 234.4789        | 964.584         | 11.85 ±0.01      | 99.79          | 2.94           | 30.4 ±2.9 |
| 20F04622            | 17.0 % | ✓ | 0.0118303       | 5.53988          | 0.0000000        | 341.7308        | 1404.983        | 11.84 ±0.01      | 99.73          | 4.29           | 26.5 ±1.6 |
| 20F04623            | 17.0 % | ✓ | 0.0019143       | 5.01443          | 0.0000000        | 353.8443        | 1456.196        | 11.85 ±0.01      | 99.95          | 4.44           | 30.3 ±1.9 |
| 20F04625            | 17.0 % | ✓ | 0.0101891       | 2.26202          | 0.0000000        | 140.0219        | 576.389         | 11.86 ±0.01      | 99.46          | 1.76           | 26.6 ±3.9 |
| 20F04626            | 17.0 % | ✓ | 0.0496652       | 3.26106          | 0.0000000        | 194.8811        | 801.188         | 11.84 ±0.01      | 98.17          | 2.45           | 25.7 ±2.6 |
| 20F04628            | 17.0 % | ✓ | 0.0010477       | 3.41152          | 0.0000000        | 220.5462        | 907.028         | 11.85 ±0.01      | 99.95          | 2.77           | 27.8 ±2.7 |
| 20F04629            | 17.0 % | ✓ | 0.0033850       | 2.27772          | 0.0000000        | 163.2105        | 672.245         | 11.86 ±0.01      | 99.84          | 2.05           | 30.8 ±4.6 |
| 20F04631            | 17.0 % | ✓ | 0.0198765       | 2.66851          | 0.0042135        | 200.8178        | 825.659         | 11.84 ±0.01      | 99.27          | 2.52           | 32.4 ±3.8 |
| 20F04632            | 17.0 % | ✓ | 0.0202032       | 2.57270          | 0.0000000        | 196.5361        | 808.782         | 11.85 ±0.01      | 99.25          | 2.47           | 32.8 ±3.9 |
| 20F04634            | 17.0 % | ✓ | 0.0024998       | 1.83642          | 0.0000000        | 125.9676        | 518.475         | 11.85 ±0.01      | 100.13         | 1.58           | 29.5 ±5.3 |
| 20F04635            | 17.0 % | ✓ | 0.0047592       | 2.21205          | 0.0000000        | 153.1944        | 630.686         | 11.86 ±0.01      | 99.76          | 1.92           | 29.8 ±4.3 |
| 20F04637            | 17.0 % | ✓ | 0.0166444       | 3.97284          | 0.0000000        | 284.5546        | 1169.087        | 11.83 ±0.01      | 99.56          | 3.57           | 30.8 ±2.4 |
| 20F04638            | 17.0 % |   | 0.3519653       | 3.47640          | 0.0000000        | 250.2148        | 1043.586        | 12.01 ±0.01      | 90.84          | 3.14           | 30.9 ±2.6 |
| 20F04640            | 17.0 % | ✓ | 0.0763720       | 3.61370          | 0.0000000        | 243.3287        | 1001.953        | 11.86 ±0.01      | 97.76          | 3.05           | 29.0 ±2.5 |
| 20F04641            | 17.0 % | ✓ | 0.0116255       | 3.24288          | 0.0000000        | 232.1993        | 955.460         | 11.85 ±0.01      | 99.62          | 2.92           | 30.8 ±3.0 |
| 20F04643            | 17.0 % | ✓ | 0.0097800       | 4.49269          | 0.0000000        | 265.5790        | 1093.424        | 11.86 ±0.01      | 99.72          | 3.33           | 25.4 ±2.0 |
| 20F04644            | 17.0 % | ✓ | 0.0218131       | 4.45639          | 0.0000000        | 279.6073        | 1149.481        | 11.84 ±0.01      | 99.42          | 3.51           | 27.0 ±2.0 |
| 20F04646            | 17.0 % | ✓ | 0.4626377       | 3.52566          | 0.0000000        | 218.9292        | 901.984         | 11.87 ±0.01      | 86.71          | 2.75           | 26.7 ±2.5 |
| 20F04647            | 17.0 % | ✓ | 0.0169748       | 3.85617          | 0.0000000        | 224.4794        | 924.845         | 11.87 ±0.01      | 99.44          | 2.82           | 25.0 ±2.1 |
| Σ                   |        |   | 7.4121609       | 116.87881        | 0.0225461        | 7965.4778       | 32786.436       |                  |                |                |           |

| Information on Analysis                                                                                                                                                                                                                                    | Results          | 40(r)/39(k) ± 2σ | Age ± 2σ<br>(Ma)    | MSWD                  | 39Ar(k)<br>(%,n)    | K/Ca ± 2σ |
|------------------------------------------------------------------------------------------------------------------------------------------------------------------------------------------------------------------------------------------------------------|------------------|------------------|---------------------|-----------------------|---------------------|-----------|
| Project = SWENTON (18-58)<br>Sample = VS17-065<br>Material = Sanidine<br>Location = Sacramento Butte<br>Region = Eastern Oregon<br>Analyst = Dan Miggins<br>Irradiation = 19-OSU-02 (2C38-19)<br>J = 0.00157855 ± 0.00000379<br>FCT-NM = 28.201 ± 0.023 Ma | Age Plateau      | 4.11527          | ±0.00131            | 3.55                  | 93.01               | 28.6 ±0.9 |
|                                                                                                                                                                                                                                                            | Error Mean       |                  | ±0.03%              | 0%                    | 28                  |           |
|                                                                                                                                                                                                                                                            |                  |                  | Full External Error | 1.54                  | 2σ Confidence Limit |           |
|                                                                                                                                                                                                                                                            |                  |                  | Analytical Error    | 1.8829                | Error Magnification |           |
|                                                                                                                                                                                                                                                            |                  |                  |                     |                       |                     |           |
|                                                                                                                                                                                                                                                            | Total Fusion Age | 4.11607          | ±0.00113<br>±0.03%  | 11.86 ±0.06<br>±0.48% | 30                  | 29.3 ±0.4 |
|                                                                                                                                                                                                                                                            |                  |                  | Full External Error |                       |                     |           |
|                                                                                                                                                                                                                                                            |                  |                  | Analytical Error    |                       |                     |           |

| Normal Isochron |        |   | 39(k)/36(a) ± 2σ     | 40(a+r)/36(a) ± 2σ   | r.i.   |
|-----------------|--------|---|----------------------|----------------------|--------|
| 20F04604        | 17.0 % | ✓ | 40613.09 ±5932.37    | 167630.69 ±24485.47  | 1.0000 |
| 20F04605        | 17.0 % |   | 52.60 ±0.19          | 513.57 ±1.79         | 0.9725 |
| 20F04607        | 17.0 % | ✓ | 3533.52 ±42.62       | 14834.61 ±178.51     | 0.9976 |
| 20F04608        | 17.0 % | ✓ | 14060.90 ±492.28     | 58222.16 ±2037.81    | 0.9997 |
| 20F04610        | 17.0 % | ✓ | 15054.68 ±575.52     | 62318.24 ±2381.76    | 0.9998 |
| 20F04611        | 17.0 % | ✓ | 181472.03 ±86022.45  | 747763.38 ±354458.70 | 1.0000 |
| 20F04613        | 17.0 % | ✓ | 13656.56 ±511.26     | 56518.35 ±2115.35    | 0.9997 |
| 20F04614        | 17.0 % | ✓ | 9194.97 ±191.21      | 38137.16 ±792.45     | 0.9992 |
| 20F04616        | 17.0 % | ✓ | 13749.24 ±627.52     | 56796.32 ±2591.76    | 0.9998 |
| 20F04617        | 17.0 % | ✓ | 43528.04 ±6190.04    | 179273.06 ±25493.65  | 1.0000 |
| 20F04619        | 17.0 % | ✓ | 1682.19 ±13.48       | 7225.38 ±57.60       | 0.9945 |
| 20F04620        | 17.0 % | ✓ | 36707.19 ±4583.62    | 151302.28 ±18892.68  | 1.0000 |
| 20F04622        | 17.0 % | ✓ | 28886.05 ±1943.97    | 119059.90 ±8011.87   | 0.9999 |
| 20F04623        | 17.0 % | ✓ | 184844.55 ±75370.32  | 760999.78 ±310296.85 | 1.0000 |
| 20F04625        | 17.0 % | ✓ | 13742.33 ±1040.01    | 56867.74 ±4303.44    | 0.9999 |
| 20F04626        | 17.0 % | ✓ | 3923.89 ±68.50       | 16430.33 ±286.51     | 0.9988 |
| 20F04628        | 17.0 % | ✓ | 210509.89 ±152464.42 | 866051.10 ±627247.94 | 1.0000 |
| 20F04629        | 17.0 % | ✓ | 48216.00 ±10391.54   | 198894.59 ±42865.57  | 1.0000 |
| 20F04631        | 17.0 % | ✓ | 10103.26 ±414.82     | 41837.95 ±1717.42    | 0.9998 |
| 20F04632        | 17.0 % | ✓ | 9727.95 ±384.94      | 40330.85 ±1595.54    | 0.9998 |
| 20F04634        | 17.0 % | ✓ | 50391.94 ±12624.68   | 207111.45 ±51887.29  | 1.0000 |
| 20F04635        | 17.0 % | ✓ | 32188.81 ±5045.48    | 132816.58 ±20818.21  | 1.0000 |
| 20F04637        | 17.0 % | ✓ | 17096.08 ±856.26     | 70537.44 ±3532.38    | 0.9999 |
| 20F04638        | 17.0 % |   | 710.91 ±4.25         | 3263.58 ±19.31       | 0.9899 |
| 20F04640        | 17.0 % | ✓ | 3186.10 ±47.38       | 13417.93 ±199.21     | 0.9984 |
| 20F04641        | 17.0 % | ✓ | 19973.27 ±1304.42    | 82485.10 ±5386.52    | 0.9999 |
| 20F04643        | 17.0 % | ✓ | 27155.20 ±2611.75    | 112100.09 ±10781.23  | 1.0000 |
| 20F04644        | 17.0 % | ✓ | 12818.33 ±535.29     | 52995.42 ±2212.65    | 0.9998 |
| 20F04646        | 17.0 % | ✓ | 473.22 ±2.64         | 2248.21 ±12.42       | 0.9885 |
| 20F04647        | 17.0 % | ✓ | 13224.26 ±730.14     | 54781.90 ±3024.28    | 0.9999 |

| Results         | 40(a)/36(a) ± 2σ      | 40(r)/39(k) ± 2σ | Age ± 2σ (Ma)             | MSWD            |
|-----------------|-----------------------|------------------|---------------------------|-----------------|
| Normal Isochron | 300.24 ±4.26          | 4.11536 ±0.00144 | 11.85 ±0.06               | 3.54            |
| Error Chron     | ±1.42%                | ±0.04%           | ±0.48%                    | 0%              |
|                 |                       |                  | Full External Error ±0.62 |                 |
|                 |                       |                  | Analytical Error ±0.00    |                 |
|                 |                       |                  |                           |                 |
| Statistics      | 2σ Confidence Limit   | 1.55             | Convergence               | 0.000000010735  |
|                 | Error Magnification   | 1.8803           | Number of Iterations      | 1               |
|                 | Number of Data Points | 28               | Calculated Line           | Weighted York-2 |

| Inverse Isochron |        |   | 39(k)/40(a+r) ± 2σ   | 36(a)/40(a+r) ± 2σ     | r.i.   |
|------------------|--------|---|----------------------|------------------------|--------|
| 20F04604         | 17.0 % | ✓ | 0.2422772 ±0.0002043 | 0.00000597 ±0.00000087 | 0.0001 |
| 20F04605         | 17.0 % |   | 0.1024176 ±0.0000857 | 0.00194717 ±0.00000680 | 0.0008 |
| 20F04607         | 17.0 % | ✓ | 0.2381945 ±0.0001992 | 0.00006741 ±0.00000081 | 0.0005 |
| 20F04608         | 17.0 % | ✓ | 0.2415044 ±0.0002019 | 0.00001718 ±0.00000060 | 0.0002 |
| 20F04610         | 17.0 % | ✓ | 0.2415774 ±0.0002020 | 0.00001605 ±0.00000061 | 0.0002 |
| 20F04611         | 17.0 % | ✓ | 0.2426864 ±0.0002042 | 0.00000134 ±0.00000063 | 0.0000 |
| 20F04613         | 17.0 % | ✓ | 0.2416305 ±0.0002030 | 0.00001769 ±0.00000066 | 0.0002 |
| 20F04614         | 17.0 % | ✓ | 0.2411025 ±0.0002011 | 0.00002622 ±0.00000054 | 0.0003 |
| 20F04616         | 17.0 % | ✓ | 0.2420797 ±0.0002048 | 0.00001761 ±0.00000080 | 0.0003 |
| 20F04617         | 17.0 % | ✓ | 0.2428030 ±0.0002066 | 0.00000558 ±0.00000079 | 0.0001 |
| 20F04619         | 17.0 % | ✓ | 0.2328163 ±0.0001952 | 0.00013840 ±0.00000110 | 0.0011 |
| 20F04620         | 17.0 % | ✓ | 0.2426083 ±0.0002057 | 0.00000661 ±0.00000083 | 0.0001 |
| 20F04622         | 17.0 % | ✓ | 0.2426178 ±0.0002034 | 0.00000840 ±0.00000057 | 0.0001 |
| 20F04623         | 17.0 % | ✓ | 0.2428970 ±0.0002034 | 0.00000131 ±0.00000054 | 0.0000 |
| 20F04625         | 17.0 % | ✓ | 0.2416543 ±0.0002095 | 0.00001758 ±0.00000133 | 0.0003 |
| 20F04626         | 17.0 % | ✓ | 0.2388201 ±0.0002034 | 0.00006086 ±0.00000106 | 0.0009 |
| 20F04628         | 17.0 % | ✓ | 0.2430687 ±0.0002068 | 0.00000115 ±0.00000084 | 0.0000 |
| 20F04629         | 17.0 % | ✓ | 0.2424198 ±0.0002081 | 0.00000503 ±0.00000108 | 0.0001 |
| 20F04631         | 17.0 % | ✓ | 0.2414856 ±0.0002056 | 0.00002390 ±0.00000098 | 0.0003 |
| 20F04632         | 17.0 % | ✓ | 0.2412037 ±0.0002059 | 0.00002479 ±0.00000098 | 0.0004 |
| 20F04634         | 17.0 % | ✓ | 0.2433083 ±0.0002126 | 0.00000483 ±0.00000121 | 0.0001 |
| 20F04635         | 17.0 % | ✓ | 0.2423554 ±0.0002091 | 0.00000753 ±0.00000118 | 0.0001 |
| 20F04637         | 17.0 % | ✓ | 0.2423688 ±0.0002034 | 0.00001418 ±0.00000071 | 0.0002 |
| 20F04638         | 17.0 % |   | 0.2178303 ±0.0001841 | 0.00030641 ±0.00000181 | 0.0019 |
| 20F04640         | 17.0 % | ✓ | 0.2374507 ±0.0002010 | 0.00007453 ±0.00000111 | 0.0006 |
| 20F04641         | 17.0 % | ✓ | 0.2421439 ±0.0002051 | 0.00001212 ±0.00000079 | 0.0002 |
| 20F04643         | 17.0 % | ✓ | 0.2422407 ±0.0002049 | 0.00000892 ±0.00000086 | 0.0001 |
| 20F04644         | 17.0 % | ✓ | 0.2418762 ±0.0002035 | 0.00001887 ±0.00000079 | 0.0002 |
| 20F04646         | 17.0 % | ✓ | 0.2104868 ±0.0001777 | 0.00044480 ±0.00000246 | 0.0018 |
| 20F04647         | 17.0 % | ✓ | 0.2413984 ±0.0002048 | 0.00001825 ±0.00000101 | 0.0003 |

| Results          | 40(a)/36(a) ± 2σ      | 40(r)/39(k) ± 2σ | Age ± 2σ (Ma)             | MSWD            |
|------------------|-----------------------|------------------|---------------------------|-----------------|
| Inverse Isochron | 300.77 ±4.26          | 4.11498 ±0.00143 | 11.85 ±0.06               | 3.54            |
| Error Chron      | ±1.42%                | ±0.03%           | ±0.48%                    | 0%              |
|                  |                       |                  | Full External Error ±0.62 |                 |
|                  |                       |                  | Analytical Error ±0.00    |                 |
|                  |                       |                  |                           |                 |
| Statistics       | 2σ Confidence Limit   | 1.55             | Convergence               | 0.0000025084    |
|                  | Error Magnification   | 1.8823           | Number of Iterations      | 2               |
|                  | Number of Data Points | 28               | Calculated Line           | Weighted York-2 |
|                  | Spreading Factor      | 13.5%            |                           |                 |

[illegible]



| Additional Parameters |        |   | 40Ar/39Ar | 1σ       | 37Ar/39Ar | 1σ       | 36Ar/39Ar | 1σ       | Time (days) | 37Ar (decay) | 39Ar (decay) | 40Ar (moles) |
|-----------------------|--------|---|-----------|----------|-----------|----------|-----------|----------|-------------|--------------|--------------|--------------|
| 20F04604              | 17.0 % | ✓ | 4.128073  | 0.001740 | 0.014447  | 0.000670 | 0.000029  | 0.000002 | 148.900     | 18.982942    | 1.00105207   | 3.204E-11    |
| 20F04605              | 17.0 % |   | 9.764473  | 0.004084 | 0.013043  | 0.000504 | 0.019015  | 0.000034 | 148.906     | 18.985025    | 1.00105211   | 1.060E-10    |
| 20F04607              | 17.0 % | ✓ | 4.198817  | 0.001754 | 0.014698  | 0.000368 | 0.000287  | 0.000002 | 148.918     | 18.989713    | 1.00105220   | 6.307E-11    |
| 20F04608              | 17.0 % | ✓ | 4.141280  | 0.001730 | 0.014690  | 0.000408 | 0.000075  | 0.000001 | 148.924     | 18.991797    | 1.00105224   | 5.759E-11    |
| 20F04610              | 17.0 % | ✓ | 4.140033  | 0.001730 | 0.013041  | 0.000425 | 0.000070  | 0.000001 | 148.935     | 18.996226    | 1.00105232   | 5.536E-11    |
| 20F04611              | 17.0 % | ✓ | 4.121115  | 0.001733 | 0.013464  | 0.000545 | 0.000009  | 0.000001 | 148.942     | 18.998571    | 1.00105237   | 4.316E-11    |
| 20F04613              | 17.0 % | ✓ | 4.139117  | 0.001737 | 0.015584  | 0.000513 | 0.000077  | 0.000001 | 148.953     | 19.003002    | 1.00105245   | 4.603E-11    |
| 20F04614              | 17.0 % | ✓ | 4.148178  | 0.001729 | 0.015885  | 0.000334 | 0.000113  | 0.000001 | 148.959     | 19.005087    | 1.00105249   | 7.194E-11    |
| 20F04616              | 17.0 % | ✓ | 4.131443  | 0.001746 | 0.013042  | 0.000606 | 0.000076  | 0.000002 | 148.972     | 19.009780    | 1.00105258   | 3.781E-11    |
| 20F04617              | 17.0 % | ✓ | 4.119139  | 0.001752 | 0.012393  | 0.000741 | 0.000026  | 0.000002 | 148.977     | 19.011866    | 1.00105262   | 3.147E-11    |
| 20F04619              | 17.0 % | ✓ | 4.295798  | 0.001800 | 0.014625  | 0.000421 | 0.000598  | 0.000002 | 148.989     | 19.016300    | 1.00105270   | 5.265E-11    |
| 20F04620              | 17.0 % | ✓ | 4.122440  | 0.001747 | 0.014128  | 0.000669 | 0.000031  | 0.000002 | 148.995     | 19.018648    | 1.00105275   | 3.422E-11    |
| 20F04622              | 17.0 % | ✓ | 4.122273  | 0.001727 | 0.016211  | 0.000486 | 0.000039  | 0.000001 | 149.007     | 19.023083    | 1.00105283   | 4.987E-11    |
| 20F04623              | 17.0 % | ✓ | 4.117541  | 0.001723 | 0.014171  | 0.000455 | 0.000009  | 0.000001 | 149.013     | 19.025171    | 1.00105287   | 5.158E-11    |
| 20F04625              | 17.0 % | ✓ | 4.138708  | 0.001793 | 0.016155  | 0.001194 | 0.000077  | 0.000003 | 149.025     | 19.029869    | 1.00105296   | 2.051E-11    |
| 20F04626              | 17.0 % | ✓ | 4.187814  | 0.001783 | 0.016733  | 0.000852 | 0.000259  | 0.000002 | 149.031     | 19.031957    | 1.00105300   | 2.889E-11    |
| 20F04628              | 17.0 % | ✓ | 4.114630  | 0.001749 | 0.015468  | 0.000742 | 0.000009  | 0.000002 | 149.042     | 19.036396    | 1.00105308   | 3.212E-11    |
| 20F04629              | 17.0 % | ✓ | 4.125645  | 0.001770 | 0.013956  | 0.001041 | 0.000025  | 0.000002 | 149.049     | 19.038746    | 1.00105312   | 2.384E-11    |
| 20F04631              | 17.0 % | ✓ | 4.141606  | 0.001762 | 0.013288  | 0.000773 | 0.000103  | 0.000002 | 149.060     | 19.043186    | 1.00105321   | 2.944E-11    |
| 20F04632              | 17.0 % | ✓ | 4.146446  | 0.001769 | 0.013090  | 0.000775 | 0.000106  | 0.000002 | 149.066     | 19.045276    | 1.00105325   | 2.885E-11    |
| 20F04634              | 17.0 % | ✓ | 4.110580  | 0.001795 | 0.014578  | 0.001316 | 0.000002  | 0.000002 | 149.078     | 19.049978    | 1.00105333   | 1.833E-11    |
| 20F04635              | 17.0 % | ✓ | 4.126741  | 0.001779 | 0.014439  | 0.001035 | 0.000035  | 0.000002 | 149.084     | 19.052069    | 1.00105337   | 2.238E-11    |
| 20F04637              | 17.0 % | ✓ | 4.126513  | 0.001731 | 0.013961  | 0.000542 | 0.000062  | 0.000001 | 149.096     | 19.056512    | 1.00105346   | 4.157E-11    |
| 20F04638              | 17.0 % |   | 4.591295  | 0.001940 | 0.013894  | 0.000579 | 0.001410  | 0.000004 | 149.102     | 19.058865    | 1.00105350   | 4.067E-11    |
| 20F04640              | 17.0 % | ✓ | 4.211967  | 0.001782 | 0.014851  | 0.000639 | 0.000318  | 0.000002 | 149.114     | 19.063309    | 1.00105358   | 3.628E-11    |
| 20F04641              | 17.0 % | ✓ | 4.130345  | 0.001748 | 0.013966  | 0.000683 | 0.000054  | 0.000002 | 149.119     | 19.065401    | 1.00105362   | 3.395E-11    |
| 20F04643              | 17.0 % | ✓ | 4.128688  | 0.001745 | 0.016916  | 0.000659 | 0.000041  | 0.000002 | 149.132     | 19.070109    | 1.00105371   | 3.882E-11    |
| 20F04644              | 17.0 % | ✓ | 4.134910  | 0.001738 | 0.015938  | 0.000604 | 0.000082  | 0.000002 | 149.138     | 19.072202    | 1.00105375   | 4.093E-11    |
| 20F04646              | 17.0 % | ✓ | 4.751449  | 0.002005 | 0.016104  | 0.000756 | 0.002118  | 0.000006 | 149.149     | 19.076650    | 1.00105383   | 3.682E-11    |
| 20F04647              | 17.0 % | ✓ | 4.143091  | 0.001756 | 0.017178  | 0.000705 | 0.000080  | 0.000002 | 149.156     | 19.079005    | 1.00105388   | 3.292E-11    |

| Procedure<br>Blanks |        | 36Ar ± 1σ (SE)<br>[fA] | 37Ar ± 1σ (SE)<br>[fA] | 38Ar ± 1σ (SE)<br>[fA] | 39Ar ± 1σ (SE)<br>[fA] | 40Ar ± 1σ (SE)<br>[fA] |
|---------------------|--------|------------------------|------------------------|------------------------|------------------------|------------------------|
| 20F04604            | 17.0 % | 0.0082555 ±0.0002412   | 0.0087804 ±0.0058447   | 0.0335695 ±0.0069739   | 0.0262853 ±0.0057382   | 1.7590893 ±0.0158175   |
| 20F04605            | 17.0 % | 0.0082555 ±0.0002412   | 0.0087804 ±0.0058447   | 0.0335695 ±0.0069739   | 0.0262853 ±0.0057382   | 1.7590893 ±0.0158175   |
| 20F04607            | 17.0 % | 0.0092769 ±0.0002055   | 0.0182696 ±0.0054686   | 0.0349370 ±0.0063400   | 0.0398796 ±0.0063600   | 2.0624442 ±0.0135483   |
| 20F04608            | 17.0 % | 0.0092769 ±0.0002055   | 0.0182696 ±0.0054686   | 0.0349370 ±0.0063400   | 0.0398796 ±0.0063600   | 2.0624442 ±0.0135483   |
| 20F04610            | 17.0 % | 0.0077885 ±0.0002166   | 0.0155095 ±0.0055972   | 0.0301341 ±0.0062528   | 0.0316052 ±0.0061219   | 1.8136221 ±0.0157398   |
| 20F04611            | 17.0 % | 0.0077885 ±0.0002166   | 0.0155095 ±0.0055972   | 0.0301341 ±0.0062528   | 0.0316052 ±0.0061219   | 1.8136221 ±0.0157398   |
| 20F04613            | 17.0 % | 0.0078894 ±0.0002137   | 0.0276688 ±0.0059697   | 0.0460922 ±0.0060876   | 0.0373850 ±0.0061178   | 1.7331891 ±0.0155729   |
| 20F04614            | 17.0 % | 0.0078894 ±0.0002137   | 0.0276688 ±0.0059697   | 0.0460922 ±0.0060876   | 0.0373850 ±0.0061178   | 1.7331891 ±0.0155729   |
| 20F04616            | 17.0 % | 0.0084357 ±0.0002192   | 0.0075816 ±0.0056430   | 0.0337361 ±0.0072884   | 0.0344972 ±0.0069147   | 1.6963201 ±0.0150854   |
| 20F04617            | 17.0 % | 0.0084357 ±0.0002192   | 0.0075816 ±0.0056430   | 0.0337361 ±0.0072884   | 0.0344972 ±0.0069147   | 1.6963201 ±0.0150854   |
| 20F04619            | 17.0 % | 0.0081292 ±0.0002203   | 0.0149361 ±0.0055656   | 0.0299831 ±0.0066187   | 0.0293970 ±0.0065897   | 1.7190901 ±0.0144188   |
| 20F04620            | 17.0 % | 0.0081292 ±0.0002203   | 0.0149361 ±0.0055656   | 0.0299831 ±0.0066187   | 0.0293970 ±0.0065897   | 1.7190901 ±0.0144188   |
| 20F04622            | 17.0 % | 0.0088273 ±0.0002006   | 0.0178928 ±0.0060298   | 0.0370138 ±0.0059782   | 0.0336064 ±0.0056078   | 1.8034939 ±0.0159967   |
| 20F04623            | 17.0 % | 0.0088273 ±0.0002006   | 0.0178928 ±0.0060298   | 0.0370138 ±0.0059782   | 0.0336064 ±0.0056078   | 1.8034939 ±0.0159967   |
| 20F04625            | 17.0 % | 0.0082205 ±0.0002239   | 0.0241443 ±0.0063947   | 0.0331129 ±0.0061801   | 0.0381719 ±0.0061618   | 1.8006311 ±0.0151886   |
| 20F04626            | 17.0 % | 0.0082205 ±0.0002239   | 0.0241443 ±0.0063947   | 0.0331129 ±0.0061801   | 0.0381719 ±0.0061618   | 1.8006311 ±0.0151886   |
| 20F04628            | 17.0 % | 0.0084106 ±0.0002268   | 0.0219932 ±0.0062037   | 0.0228143 ±0.0054838   | 0.0125926 ±0.0071398   | 1.7849584 ±0.0154439   |
| 20F04629            | 17.0 % | 0.0084106 ±0.0002268   | 0.0219932 ±0.0062037   | 0.0228143 ±0.0054838   | 0.0125926 ±0.0071398   | 1.7849584 ±0.0154439   |
| 20F04631            | 17.0 % | 0.0084357 ±0.0002192   | 0.0075816 ±0.0056430   | 0.0337361 ±0.0072884   | 0.0344972 ±0.0069147   | 1.6963201 ±0.0150854   |
| 20F04632            | 17.0 % | 0.0084357 ±0.0002192   | 0.0075816 ±0.0056430   | 0.0337361 ±0.0072884   | 0.0344972 ±0.0069147   | 1.6963201 ±0.0150854   |
| 20F04634            | 17.0 % | 0.0104151 ±0.0002065   | 0.0192112 ±0.0055853   | 0.0188040 ±0.0067824   | 0.0249802 ±0.0057106   | 2.5052954 ±0.0161436   |
| 20F04635            | 17.0 % | 0.0104151 ±0.0002065   | 0.0192112 ±0.0055853   | 0.0188040 ±0.0067824   | 0.0249802 ±0.0057106   | 2.5052954 ±0.0161436   |
| 20F04637            | 17.0 % | 0.0081292 ±0.0002203   | 0.0149361 ±0.0055656   | 0.0299831 ±0.0066187   | 0.0293970 ±0.0065897   | 1.7190901 ±0.0144188   |
| 20F04638            | 17.0 % | 0.0081292 ±0.0002203   | 0.0149361 ±0.0055656   | 0.0299831 ±0.0066187   | 0.0293970 ±0.0065897   | 1.7190901 ±0.0144188   |
| 20F04640            | 17.0 % | 0.0088273 ±0.0002006   | 0.0178928 ±0.0060298   | 0.0370138 ±0.0059782   | 0.0336064 ±0.0056078   | 1.8034939 ±0.0159967   |
| 20F04641            | 17.0 % | 0.0088273 ±0.0002006   | 0.0178928 ±0.0060298   | 0.0370138 ±0.0059782   | 0.0336064 ±0.0056078   | 1.8034939 ±0.0159967   |
| 20F04643            | 17.0 % | 0.0082205 ±0.0002239   | 0.0241443 ±0.0063947   | 0.0331129 ±0.0061801   | 0.0381719 ±0.0061618   | 1.8006311 ±0.0151886   |
| 20F04644            | 17.0 % | 0.0082205 ±0.0002239   | 0.0241443 ±0.0063947   | 0.0331129 ±0.0061801   | 0.0381719 ±0.0061618   | 1.8006311 ±0.0151886   |
| 20F04646            | 17.0 % | 0.0084106 ±0.0002268   | 0.0219932 ±0.0062037   | 0.0228143 ±0.0054838   | 0.0125926 ±0.0071398   | 1.7849584 ±0.0154439   |
| 20F04647            | 17.0 % | 0.0084106 ±0.0002268   | 0.0219932 ±0.0062037   | 0.0228143 ±0.0054838   | 0.0125926 ±0.0071398   | 1.7849584 ±0.0154439   |

| OSU Argon Geochronology Lab<br>CEOAS Oregon State University, Corvallis, USA |        |                        |        |                        |                        |        |                        |                        |        |                        |                        |        |                        |                        |        |                        |  |
|------------------------------------------------------------------------------|--------|------------------------|--------|------------------------|------------------------|--------|------------------------|------------------------|--------|------------------------|------------------------|--------|------------------------|------------------------|--------|------------------------|--|
| Intercept<br>Values                                                          |        | 36Ar ± 1σ (SE)<br>[fA] | r2     | Regression<br>(type,n) | 37Ar ± 1σ (SE)<br>[fA] | r2     | Regression<br>(type,n) | 38Ar ± 1σ (SE)<br>[fA] | r2     | Regression<br>(type,n) | 39Ar ± 1σ (SE)<br>[fA] | r2     | Regression<br>(type,n) | 40Ar ± 1σ (SE)<br>[fA] | r2     | Regression<br>(type,n) |  |
| 20F04604                                                                     | 17.0 % | 0.0144336 ± 0.0003030  | 0.9772 | EXP 150 of 150         | 0.1577982 ± 0.0049998  | 0.0812 | EXP 149 of 150         | 2.5972497 ± 0.0064075  | 0.9442 | EXP 150 of 150         | 218.85611 ± 0.01577    | 1.0000 | EXP 145 of 150         | 906.76260 ± 0.04212    | 1.0000 | EXP 150 of 150         |  |
| 20F04605                                                                     | 17.0 % | 5.7700920 ± 0.0032754  | 0.9968 | EXP 150 of 150         | 0.2016088 ± 0.0055844  | 0.1189 | EXP 149 of 150         | 4.7775734 ± 0.0073615  | 0.9777 | EXP 149 of 150         | 306.21946 ± 0.02100    | 1.0000 | EXP 150 of 150         | 2996.85672 ± 0.07026   | 1.0000 | EXP 150 of 150         |  |
| 20F04607                                                                     | 17.0 % | 0.1295728 ± 0.0006527  | 0.9249 | EXP 150 of 150         | 0.3096256 ± 0.0059620  | 0.2256 | EXP 150 of 150         | 5.0797045 ± 0.0069885  | 0.9828 | EXP 149 of 150         | 423.62614 ± 0.02720    | 1.0000 | EXP 150 of 150         | 1783.79561 ± 0.05433   | 1.0000 | EXP 149 of 150         |  |
| 20F04608                                                                     | 17.0 % | 0.0384149 ± 0.0004323  | 0.9814 | EXP 150 of 150         | 0.2850764 ± 0.0062554  | 0.2126 | EXP 150 of 150         | 4.6902555 ± 0.0068484  | 0.9801 | EXP 148 of 150         | 392.15098 ± 0.02395    | 1.0000 | EXP 150 of 150         | 1628.82519 ± 0.05669   | 1.0000 | EXP 150 of 150         |  |
| 20F04610                                                                     | 17.0 % | 0.0338915 ± 0.0004168  | 0.9807 | EXP 149 of 150         | 0.2434026 ± 0.0062161  | 0.0991 | EXP 150 of 150         | 4.5137875 ± 0.0066793  | 0.9795 | EXP 150 of 150         | 377.12615 ± 0.02371    | 1.0000 | EXP 148 of 150         | 1565.74990 ± 0.04915   | 1.0000 | EXP 147 of 150         |  |
| 20F04611                                                                     | 17.0 % | 0.0104626 ± 0.0003113  | 0.9882 | EXP 149 of 150         | 0.1938114 ± 0.0062895  | 0.0674 | EXP 150 of 150         | 3.5053123 ± 0.0062032  | 0.9715 | EXP 149 of 150         | 295.35365 ± 0.02164    | 1.0000 | EXP 146 of 150         | 1221.07196 ± 0.04868   | 1.0000 | EXP 150 of 150         |  |
| 20F04613                                                                     | 17.0 % | 0.0319226 ± 0.0003630  | 0.9802 | EXP 148 of 150         | 0.2295437 ± 0.0059048  | 0.1925 | EXP 145 of 150         | 3.7553634 ± 0.0067762  | 0.9705 | EXP 150 of 150         | 313.61933 ± 0.02183    | 1.0000 | EXP 150 of 150         | 1302.06594 ± 0.05134   | 1.0000 | EXP 150 of 150         |  |
| 20F04614                                                                     | 17.0 % | 0.0626004 ± 0.0004932  | 0.9801 | EXP 150 of 150         | 0.3811431 ± 0.0059216  | 0.3648 | EXP 150 of 150         | 5.8133671 ± 0.0074789  | 0.9844 | EXP 150 of 150         | 489.09640 ± 0.02764    | 1.0000 | EXP 149 of 150         | 2033.98409 ± 0.06688   | 1.0000 | EXP 150 of 150         |  |
| 20F04616                                                                     | 17.0 % | 0.0279114 ± 0.0003589  | 0.9768 | EXP 150 of 150         | 0.1695018 ± 0.0059460  | 0.0744 | EXP 150 of 150         | 3.0657080 ± 0.0072040  | 0.9515 | EXP 150 of 150         | 258.09274 ± 0.02071    | 0.9999 | EXP 150 of 150         | 1069.83558 ± 0.04839   | 1.0000 | EXP 150 of 150         |  |
| 20F04617                                                                     | 17.0 % | 0.0140482 ± 0.0002671  | 0.9864 | EXP 149 of 150         | 0.1328863 ± 0.0061892  | 0.0364 | EXP 150 of 150         | 2.5568432 ± 0.0066463  | 0.9417 | EXP 150 of 150         | 215.45471 ± 0.01946    | 0.9999 | EXP 150 of 150         | 890.74251 ± 0.04110    | 1.0000 | EXP 148 of 150         |  |
| 20F04619                                                                     | 17.0 % | 0.2127870 ± 0.0007019  | 0.5612 | EXP 150 of 150         | 0.2508991 ± 0.0051182  | 0.2647 | EXP 147 of 150         | 4.1344870 ± 0.0070280  | 0.9729 | EXP 150 of 150         | 345.62540 ± 0.02284    | 1.0000 | EXP 150 of 150         | 1488.95150 ± 0.05850   | 1.0000 | EXP 147 of 150         |  |
| 20F04620                                                                     | 17.0 % | 0.0153240 ± 0.0003237  | 0.9820 | EXP 150 of 150         | 0.1589648 ± 0.0060245  | 0.0526 | EXP 150 of 150         | 2.7888687 ± 0.0070004  | 0.9443 | EXP 149 of 150         | 234.07806 ± 0.01976    | 0.9999 | EXP 150 of 150         | 968.35285 ± 0.04512    | 1.0000 | EXP 150 of 150         |  |
| 20F04622                                                                     | 17.0 % | 0.0219932 ± 0.0003346  | 0.9861 | EXP 148 of 150         | 0.2728525 ± 0.0061696  | 0.1993 | EXP 149 of 150         | 4.0733171 ± 0.0072013  | 0.9712 | EXP 150 of 150         | 341.15633 ± 0.02296    | 1.0000 | EXP 150 of 150         | 1410.52566 ± 0.05214   | 1.0000 | EXP 149 of 150         |  |
| 20F04623                                                                     | 17.0 % | 0.0120573 ± 0.0003264  | 0.9893 | EXP 150 of 150         | 0.2452469 ± 0.0057980  | 0.1929 | EXP 150 of 150         | 4.1911773 ± 0.0061705  | 0.9797 | EXP 148 of 150         | 353.25023 ± 0.02231    | 1.0000 | EXP 150 of 150         | 1458.78539 ± 0.05480   | 1.0000 | EXP 149 of 150         |  |
| 20F04625                                                                     | 17.0 % | 0.0188898 ± 0.0003043  | 0.9677 | EXP 150 of 150         | 0.0945291 ± 0.0059763  | 0.0803 | EXP 150 of 150         | 1.6321892 ± 0.0064222  | 0.8754 | EXP 147 of 150         | 139.76208 ± 0.01507    | 0.9999 | EXP 148 of 150         | 581.31628 ± 0.03746    | 1.0000 | EXP 148 of 150         |  |
| 20F04626                                                                     | 17.0 % | 0.0581532 ± 0.0003523  | 0.9530 | EXP 147 of 150         | 0.1469237 ± 0.0058608  | 0.0657 | EXP 150 of 150         | 2.3169113 ± 0.0071240  | 0.9174 | EXP 149 of 150         | 194.53449 ± 0.01709    | 0.9999 | EXP 149 of 150         | 817.93502 ± 0.04394    | 1.0000 | EXP 150 of 150         |  |
| 20F04628                                                                     | 17.0 % | 0.0103565 ± 0.0002952  | 0.9822 | EXP 149 of 150         | 0.1569256 ± 0.0058766  | 0.0940 | EXP 150 of 150         | 2.6246444 ± 0.0066595  | 0.9416 | EXP 150 of 150         | 220.18439 ± 0.01933    | 0.9999 | EXP 150 of 150         | 909.25994 ± 0.04407    | 1.0000 | EXP 149 of 150         |  |
| 20F04629                                                                     | 17.0 % | 0.0123626 ± 0.0002763  | 0.9799 | EXP 148 of 150         | 0.0974483 ± 0.0063785  | 0.0193 | EXP 150 of 150         | 1.9213369 ± 0.0062031  | 0.9093 | EXP 149 of 150         | 162.93928 ± 0.01541    | 0.9999 | EXP 148 of 150         | 675.13942 ± 0.03908    | 1.0000 | EXP 150 of 150         |  |
| 20F04631                                                                     | 17.0 % | 0.0287844 ± 0.0003340  | 0.9685 | EXP 149 of 150         | 0.1323200 ± 0.0058301  | 0.1018 | EXP 150 of 150         | 2.3973391 ± 0.0065932  | 0.9341 | EXP 150 of 150         | 200.46506 ± 0.01792    | 0.9999 | EXP 148 of 150         | 833.41173 ± 0.03974    | 1.0000 | EXP 149 of 150         |  |
| 20F04632                                                                     | 17.0 % | 0.0290805 ± 0.0003240  | 0.9730 | EXP 149 of 150         | 0.1272823 ± 0.0056240  | 0.0469 | EXP 150 of 150         | 2.3133552 ± 0.0070359  | 0.9185 | EXP 150 of 150         | 196.19011 ± 0.01773    | 0.9999 | EXP 150 of 150         | 816.62960 ± 0.04417    | 1.0000 | EXP 149 of 150         |  |
| 20F04634                                                                     | 17.0 % | 0.0084360 ± 0.0002260  | 0.9805 | EXP 150 of 150         | 0.0770323 ± 0.0066378  | 0.0230 | EXP 150 of 150         | 1.4898065 ± 0.0067628  | 0.8344 | EXP 150 of 150         | 125.74308 ± 0.01502    | 0.9999 | EXP 150 of 150         | 520.31019 ± 0.03307    | 1.0000 | EXP 149 of 150         |  |
| 20F04635                                                                     | 17.0 % | 0.0157072 ± 0.0003021  | 0.9710 | EXP 149 of 150         | 0.0967056 ± 0.0061352  | 0.0306 | EXP 147 of 150         | 1.8084189 ± 0.0068413  | 0.8772 | EXP 150 of 150         | 152.92672 ± 0.01636    | 0.9999 | EXP 148 of 150         | 634.70479 ± 0.03541    | 1.0000 | EXP 148 of 150         |  |
| 20F04637                                                                     | 17.0 % | 0.0256323 ± 0.0003442  | 0.9785 | EXP 149 of 150         | 0.1932015 ± 0.0057892  | 0.1118 | EXP 150 of 150         | 3.3823018 ± 0.0065834  | 0.9658 | EXP 149 of 150         | 284.07428 ± 0.01829    | 1.0000 | EXP 150 of 150         | 1175.94795 ± 0.05012   | 1.0000 | EXP 149 of 150         |  |
| 20F04638                                                                     | 17.0 % | 0.3567480 ± 0.0008229  | 0.6538 | EXP 150 of 150         | 0.1671708 ± 0.0050975  | 0.0853 | EXP 150 of 150         | 3.0268997 ± 0.0059768  | 0.9651 | EXP 150 of 150         | 249.78887 ± 0.01996    | 0.9999 | EXP 150 of 150         | 1150.53948 ± 0.05134   | 1.0000 | EXP 150 of 150         |  |
| 20F04640                                                                     | 17.0 % | 0.0852367 ± 0.0005058  | 0.9086 | EXP 149 of 150         | 0.1713619 ± 0.0054019  | 0.0663 | EXP 149 of 150         | 2.9004222 ± 0.0069144  | 0.9509 | EXP 150 of 150         | 242.90957 ± 0.02085    | 0.9999 | EXP 150 of 150         | 1026.70565 ± 0.04049   | 1.0000 | EXP 150 of 150         |  |
| 20F04641                                                                     | 17.0 % | 0.0211775 ± 0.0003133  | 0.9813 | EXP 149 of 150         | 0.1519228 ± 0.0056566  | 0.0810 | EXP 150 of 150         | 2.7434140 ± 0.0061520  | 0.9555 | EXP 150 of 150         | 231.79769 ± 0.01943    | 0.9999 | EXP 150 of 150         | 960.87538 ± 0.04344    | 1.0000 | EXP 150 of 150         |  |
| 20F04643                                                                     | 17.0 % | 0.0190813 ± 0.0004040  | 0.9722 | EXP 150 of 150         | 0.2110604 ± 0.0064815  | 0.1337 | EXP 150 of 150         | 3.1481947 ± 0.0074163  | 0.9503 | EXP 150 of 150         | 265.12037 ± 0.02121    | 0.9999 | EXP 150 of 150         | 1098.30540 ± 0.05119   | 1.0000 | EXP 148 of 150         |  |
| 20F04644                                                                     | 17.0 % | 0.0309585 ± 0.0003857  | 0.9754 | EXP 150 of 150         | 0.2091344 ± 0.0060101  | 0.1074 | EXP 149 of 150         | 3.3289005 ± 0.0069021  | 0.9599 | EXP 150 of 150         | 279.12634 ± 0.02024    | 1.0000 | EXP 150 of 150         | 1157.96380 ± 0.04522   | 1.0000 | EXP 150 of 150         |  |
| 20F04646                                                                     | 17.0 % | 0.4663709 ± 0.0009848  | 0.8738 | EXP 150 of 150         | 0.1625218 ± 0.0059962  | 0.0729 | EXP 150 of 150         | 2.6740843 ± 0.0068156  | 0.9409 | EXP 149 of 150         | 218.56992 ± 0.01673    | 0.9999 | EXP 150 of 150         | 1042.02676 ± 0.04298   | 1.0000 | EXP 149 of 150         |  |
| 20F04647                                                                     | 17.0 % | 0.0262089 ± 0.0004002  | 0.9657 | EXP 150 of 150         | 0.1797938 ± 0.0054143  | 0.1651 | EXP 148 of 150         | 2.6417920 ± 0.0062116  | 0.9513 | EXP 150 of 150         | 224.11147 ± 0.01828    | 0.9999 | EXP 150 of 150         | 931.83402 ± 0.04628    | 1.0000 | EXP 150 of 150         |  |

| Project Info |        | Analyst     | Irradiation | X-pos | Y-pos | Z/H-pos | Project                | Experiment | Nmb |
|--------------|--------|-------------|-------------|-------|-------|---------|------------------------|------------|-----|
| 20F04604     | 17.0 % | Dan Miggins | 19-OSU-02   | 0.00  | 0.00  | 47.67   | Oregon\Swenton (18-58) | 20F04600   | 01  |
| 20F04605     | 17.0 % | Dan Miggins | 19-OSU-02   | 0.00  | 0.00  | 47.67   | Oregon\Swenton (18-58) | 20F04600   | 01  |
| 20F04607     | 17.0 % | Dan Miggins | 19-OSU-02   | 0.00  | 0.00  | 47.67   | Oregon\Swenton (18-58) | 20F04600   | 01  |
| 20F04608     | 17.0 % | Dan Miggins | 19-OSU-02   | 0.00  | 0.00  | 47.67   | Oregon\Swenton (18-58) | 20F04600   | 01  |
| 20F04610     | 17.0 % | Dan Miggins | 19-OSU-02   | 0.00  | 0.00  | 47.67   | Oregon\Swenton (18-58) | 20F04600   | 01  |
| 20F04611     | 17.0 % | Dan Miggins | 19-OSU-02   | 0.00  | 0.00  | 47.67   | Oregon\Swenton (18-58) | 20F04600   | 01  |
| 20F04613     | 17.0 % | Dan Miggins | 19-OSU-02   | 0.00  | 0.00  | 47.67   | Oregon\Swenton (18-58) | 20F04600   | 01  |
| 20F04614     | 17.0 % | Dan Miggins | 19-OSU-02   | 0.00  | 0.00  | 47.67   | Oregon\Swenton (18-58) | 20F04600   | 01  |
| 20F04616     | 17.0 % | Dan Miggins | 19-OSU-02   | 0.00  | 0.00  | 47.67   | Oregon\Swenton (18-58) | 20F04600   | 01  |
| 20F04617     | 17.0 % | Dan Miggins | 19-OSU-02   | 0.00  | 0.00  | 47.67   | Oregon\Swenton (18-58) | 20F04600   | 01  |
| 20F04619     | 17.0 % | Dan Miggins | 19-OSU-02   | 0.00  | 0.00  | 47.67   | Oregon\Swenton (18-58) | 20F04600   | 01  |
| 20F04620     | 17.0 % | Dan Miggins | 19-OSU-02   | 0.00  | 0.00  | 47.67   | Oregon\Swenton (18-58) | 20F04600   | 01  |
| 20F04622     | 17.0 % | Dan Miggins | 19-OSU-02   | 0.00  | 0.00  | 47.67   | Oregon\Swenton (18-58) | 20F04600   | 01  |
| 20F04623     | 17.0 % | Dan Miggins | 19-OSU-02   | 0.00  | 0.00  | 47.67   | Oregon\Swenton (18-58) | 20F04600   | 01  |
| 20F04625     | 17.0 % | Dan Miggins | 19-OSU-02   | 0.00  | 0.00  | 47.67   | Oregon\Swenton (18-58) | 20F04600   | 01  |
| 20F04626     | 17.0 % | Dan Miggins | 19-OSU-02   | 0.00  | 0.00  | 47.67   | Oregon\Swenton (18-58) | 20F04600   | 01  |
| 20F04628     | 17.0 % | Dan Miggins | 19-OSU-02   | 0.00  | 0.00  | 47.67   | Oregon\Swenton (18-58) | 20F04600   | 01  |
| 20F04629     | 17.0 % | Dan Miggins | 19-OSU-02   | 0.00  | 0.00  | 47.67   | Oregon\Swenton (18-58) | 20F04600   | 01  |
| 20F04631     | 17.0 % | Dan Miggins | 19-OSU-02   | 0.00  | 0.00  | 47.67   | Oregon\Swenton (18-58) | 20F04600   | 01  |
| 20F04632     | 17.0 % | Dan Miggins | 19-OSU-02   | 0.00  | 0.00  | 47.67   | Oregon\Swenton (18-58) | 20F04600   | 01  |
| 20F04634     | 17.0 % | Dan Miggins | 19-OSU-02   | 0.00  | 0.00  | 47.67   | Oregon\Swenton (18-58) | 20F04600   | 01  |
| 20F04635     | 17.0 % | Dan Miggins | 19-OSU-02   | 0.00  | 0.00  | 47.67   | Oregon\Swenton (18-58) | 20F04600   | 01  |
| 20F04637     | 17.0 % | Dan Miggins | 19-OSU-02   | 0.00  | 0.00  | 47.67   | Oregon\Swenton (18-58) | 20F04600   | 01  |
| 20F04638     | 17.0 % | Dan Miggins | 19-OSU-02   | 0.00  | 0.00  | 47.67   | Oregon\Swenton (18-58) | 20F04600   | 01  |
| 20F04640     | 17.0 % | Dan Miggins | 19-OSU-02   | 0.00  | 0.00  | 47.67   | Oregon\Swenton (18-58) | 20F04600   | 01  |
| 20F04641     | 17.0 % | Dan Miggins | 19-OSU-02   | 0.00  | 0.00  | 47.67   | Oregon\Swenton (18-58) | 20F04600   | 01  |
| 20F04643     | 17.0 % | Dan Miggins | 19-OSU-02   | 0.00  | 0.00  | 47.67   | Oregon\Swenton (18-58) | 20F04600   | 01  |
| 20F04644     | 17.0 % | Dan Miggins | 19-OSU-02   | 0.00  | 0.00  | 47.67   | Oregon\Swenton (18-58) | 20F04600   | 01  |
| 20F04646     | 17.0 % | Dan Miggins | 19-OSU-02   | 0.00  | 0.00  | 47.67   | Oregon\Swenton (18-58) | 20F04600   | 01  |
| 20F04647     | 17.0 % | Dan Miggins | 19-OSU-02   | 0.00  | 0.00  | 47.67   | Oregon\Swenton (18-58) | 20F04600   | 01  |

| OSU Argon Geochronology Lab<br>CEOAS Oregon State University, Corvallis, USA |        |          |          |                  |                  |                  |       |                     |                    |      |            |       |               |       |           |       |              |                        |     |       |      |      |     |        |
|------------------------------------------------------------------------------|--------|----------|----------|------------------|------------------|------------------|-------|---------------------|--------------------|------|------------|-------|---------------|-------|-----------|-------|--------------|------------------------|-----|-------|------|------|-----|--------|
| Sample Parameters                                                            |        | Sample   | Material | Location         | Standard Name    | Standard (in Ma) | %1σ   | Standard Reference  | Standard 40Ar/39Ar | %1σ  | J          | %1σ   | Air 40Ar/36Ar | %1σ   | MDF (lin) | %1σ   | Volume Ratio | Sensitivity (mol/volt) | Day | Month | Year | Hour | Min | Resist |
| 20F04604                                                                     | 17.0 % | VS17-065 | Sanidine | Sacramento Butte | FCT-NM (2C38-19) | 28.201           | 0.082 | Kuiper et al (2008) | 9.83531            | 0.24 | 0.00157855 | 0.240 | 299.209       | 0.128 | 0.999457  | 0.041 | 1            | 3.54E-14               | 1   | APR   | 2020 | 12   | 58  | 1      |
| 20F04605                                                                     | 17.0 % | VS17-065 | Sanidine | Sacramento Butte | FCT-NM (2C38-19) | 28.201           | 0.082 | Kuiper et al (2008) | 9.83531            | 0.24 | 0.00157855 | 0.240 | 299.209       | 0.128 | 0.999457  | 0.041 | 1            | 3.54E-14               | 1   | APR   | 2020 | 13   | 6   | 1      |
| 20F04607                                                                     | 17.0 % | VS17-065 | Sanidine | Sacramento Butte | FCT-NM (2C38-19) | 28.201           | 0.082 | Kuiper et al (2008) | 9.83531            | 0.24 | 0.00157855 | 0.240 | 299.209       | 0.128 | 0.999457  | 0.041 | 1            | 3.54E-14               | 1   | APR   | 2020 | 13   | 24  | 1      |
| 20F04608                                                                     | 17.0 % | VS17-065 | Sanidine | Sacramento Butte | FCT-NM (2C38-19) | 28.201           | 0.082 | Kuiper et al (2008) | 9.83531            | 0.24 | 0.00157855 | 0.240 | 299.209       | 0.128 | 0.999457  | 0.041 | 1            | 3.54E-14               | 1   | APR   | 2020 | 13   | 32  | 1      |
| 20F04610                                                                     | 17.0 % | VS17-065 | Sanidine | Sacramento Butte | FCT-NM (2C38-19) | 28.201           | 0.082 | Kuiper et al (2008) | 9.83531            | 0.24 | 0.00157855 | 0.240 | 299.209       | 0.128 | 0.999457  | 0.041 | 1            | 3.54E-14               | 1   | APR   | 2020 | 13   | 49  | 1      |
| 20F04611                                                                     | 17.0 % | VS17-065 | Sanidine | Sacramento Butte | FCT-NM (2C38-19) | 28.201           | 0.082 | Kuiper et al (2008) | 9.83531            | 0.24 | 0.00157855 | 0.240 | 299.209       | 0.128 | 0.999457  | 0.041 | 1            | 3.54E-14               | 1   | APR   | 2020 | 13   | 58  | 1      |
| 20F04613                                                                     | 17.0 % | VS17-065 | Sanidine | Sacramento Butte | FCT-NM (2C38-19) | 28.201           | 0.082 | Kuiper et al (2008) | 9.83531            | 0.24 | 0.00157855 | 0.240 | 299.209       | 0.128 | 0.999457  | 0.041 | 1            | 3.54E-14               | 1   | APR   | 2020 | 14   | 15  | 1      |
| 20F04614                                                                     | 17.0 % | VS17-065 | Sanidine | Sacramento Butte | FCT-NM (2C38-19) | 28.201           | 0.082 | Kuiper et al (2008) | 9.83531            | 0.24 | 0.00157855 | 0.240 | 299.209       | 0.128 | 0.999457  | 0.041 | 1            | 3.54E-14               | 1   | APR   | 2020 | 14   | 23  | 1      |
| 20F04616                                                                     | 17.0 % | VS17-065 | Sanidine | Sacramento Butte | FCT-NM (2C38-19) | 28.201           | 0.082 | Kuiper et al (2008) | 9.83531            | 0.24 | 0.00157855 | 0.240 | 299.209       | 0.128 | 0.999457  | 0.041 | 1            | 3.54E-14               | 1   | APR   | 2020 | 14   | 41  | 1      |
| 20F04617                                                                     | 17.0 % | VS17-065 | Sanidine | Sacramento Butte | FCT-NM (2C38-19) | 28.201           | 0.082 | Kuiper et al (2008) | 9.83531            | 0.24 | 0.00157855 | 0.240 | 299.209       | 0.128 | 0.999457  | 0.041 | 1            | 3.54E-14               | 1   | APR   | 2020 | 14   | 49  | 1      |
| 20F04619                                                                     | 17.0 % | VS17-065 | Sanidine | Sacramento Butte | FCT-NM (2C38-19) | 28.201           | 0.082 | Kuiper et al (2008) | 9.83531            | 0.24 | 0.00157855 | 0.240 | 299.209       | 0.128 | 0.999457  | 0.041 | 1            | 3.54E-14               | 1   | APR   | 2020 | 15   | 6   | 1      |
| 20F04620                                                                     | 17.0 % | VS17-065 | Sanidine | Sacramento Butte | FCT-NM (2C38-19) | 28.201           | 0.082 | Kuiper et al (2008) | 9.83531            | 0.24 | 0.00157855 | 0.240 | 299.209       | 0.128 | 0.999457  | 0.041 | 1            | 3.54E-14               | 1   | APR   | 2020 | 15   | 15  | 1      |
| 20F04622                                                                     | 17.0 % | VS17-065 | Sanidine | Sacramento Butte | FCT-NM (2C38-19) | 28.201           | 0.082 | Kuiper et al (2008) | 9.83531            | 0.24 | 0.00157855 | 0.240 | 299.209       | 0.128 | 0.999457  | 0.041 | 1            | 3.54E-14               | 1   | APR   | 2020 | 15   | 32  | 1      |
| 20F04623                                                                     | 17.0 % | VS17-065 | Sanidine | Sacramento Butte | FCT-NM (2C38-19) | 28.201           | 0.082 | Kuiper et al (2008) | 9.83531            | 0.24 | 0.00157855 | 0.240 | 299.209       | 0.128 | 0.999457  | 0.041 | 1            | 3.54E-14               | 1   | APR   | 2020 | 15   | 40  | 1      |
| 20F04625                                                                     | 17.0 % | VS17-065 | Sanidine | Sacramento Butte | FCT-NM (2C38-19) | 28.201           | 0.082 | Kuiper et al (2008) | 9.83531            | 0.24 | 0.00157855 | 0.240 | 299.209       | 0.128 | 0.999457  | 0.041 | 1            | 3.54E-14               | 1   | APR   | 2020 | 15   | 58  | 1      |
| 20F04626                                                                     | 17.0 % | VS17-065 | Sanidine | Sacramento Butte | FCT-NM (2C38-19) | 28.201           | 0.082 | Kuiper et al (2008) | 9.83531            | 0.24 | 0.00157855 | 0.240 | 299.209       | 0.128 | 0.999457  | 0.041 | 1            | 3.54E-14               | 1   | APR   | 2020 | 16   | 6   | 1      |
| 20F04628                                                                     | 17.0 % | VS17-065 | Sanidine | Sacramento Butte | FCT-NM (2C38-19) | 28.201           | 0.082 | Kuiper et al (2008) | 9.83531            | 0.24 | 0.00157855 | 0.240 | 299.209       | 0.128 | 0.999457  | 0.041 | 1            | 3.54E-14               | 1   | APR   | 2020 | 16   | 23  | 1      |
| 20F04629                                                                     | 17.0 % | VS17-065 | Sanidine | Sacramento Butte | FCT-NM (2C38-19) | 28.201           | 0.082 | Kuiper et al (2008) | 9.83531            | 0.24 | 0.00157855 | 0.240 | 299.209       | 0.128 | 0.999457  | 0.041 | 1            | 3.54E-14               | 1   | APR   | 2020 | 16   | 32  | 1      |
| 20F04631                                                                     | 17.0 % | VS17-065 | Sanidine | Sacramento Butte | FCT-NM (2C38-19) | 28.201           | 0.082 | Kuiper et al (2008) | 9.83531            | 0.24 | 0.00157855 | 0.240 | 299.209       | 0.128 | 0.999457  | 0.041 | 1            | 3.54E-14               | 1   | APR   | 2020 | 16   | 49  | 1      |
| 20F04632                                                                     | 17.0 % | VS17-065 | Sanidine | Sacramento Butte | FCT-NM (2C38-19) | 28.201           | 0.082 | Kuiper et al (2008) | 9.83531            | 0.24 | 0.00157855 | 0.240 | 299.209       | 0.128 | 0.999457  | 0.041 | 1            | 3.54E-14               | 1   | APR   | 2020 | 16   | 57  | 1      |
| 20F04634                                                                     | 17.0 % | VS17-065 | Sanidine | Sacramento Butte | FCT-NM (2C38-19) | 28.201           | 0.082 | Kuiper et al (2008) | 9.83531            | 0.24 | 0.00157855 | 0.240 | 299.209       | 0.128 | 0.999457  | 0.041 | 1            | 3.54E-14               | 1   | APR   | 2020 | 17   | 15  | 1      |
| 20F04635                                                                     | 17.0 % | VS17-065 | Sanidine | Sacramento Butte | FCT-NM (2C38-19) | 28.201           | 0.082 | Kuiper et al (2008) | 9.83531            | 0.24 | 0.00157855 | 0.240 | 299.209       | 0.128 | 0.999457  | 0.041 | 1            | 3.54E-14               | 1   | APR   | 2020 | 17   | 23  | 1      |
| 20F04637                                                                     | 17.0 % | VS17-065 | Sanidine | Sacramento Butte | FCT-NM (2C38-19) | 28.201           | 0.082 | Kuiper et al (2008) | 9.83531            | 0.24 | 0.00157855 | 0.240 | 299.209       | 0.128 | 0.999457  | 0.041 | 1            | 3.54E-14               | 1   | APR   | 2020 | 17   | 40  | 1      |
| 20F04638                                                                     | 17.0 % | VS17-065 | Sanidine | Sacramento Butte | FCT-NM (2C38-19) | 28.201           | 0.082 | Kuiper et al (2008) | 9.83531            | 0.24 | 0.00157855 | 0.240 | 299.209       | 0.128 | 0.999457  | 0.041 | 1            | 3.54E-14               | 1   | APR   | 2020 | 17   | 49  | 1      |
| 20F04640                                                                     | 17.0 % | VS17-065 | Sanidine | Sacramento Butte | FCT-NM (2C38-19) | 28.201           | 0.082 | Kuiper et al (2008) | 9.83531            | 0.24 | 0.00157855 | 0.240 | 299.209       | 0.128 | 0.999457  | 0.041 | 1            | 3.54E-14               | 1   | APR   | 2020 | 18   | 6   | 1      |
| 20F04641                                                                     | 17.0 % | VS17-065 | Sanidine | Sacramento Butte | FCT-NM (2C38-19) | 28.201           | 0.082 | Kuiper et al (2008) | 9.83531            | 0.24 | 0.00157855 | 0.240 | 299.209       | 0.128 | 0.999457  | 0.041 | 1            | 3.54E-14               | 1   | APR   | 2020 | 18   | 14  | 1      |
| 20F04643                                                                     | 17.0 % | VS17-065 | Sanidine | Sacramento Butte | FCT-NM (2C38-19) | 28.201           | 0.082 | Kuiper et al (2008) | 9.83531            | 0.24 | 0.00157855 | 0.240 | 299.209       | 0.128 | 0.999457  | 0.041 | 1            | 3.54E-14               | 1   | APR   | 2020 | 18   | 32  | 1      |
| 20F04644                                                                     | 17.0 % | VS17-065 | Sanidine | Sacramento Butte | FCT-NM (2C38-19) | 28.201           | 0.082 | Kuiper et al (2008) | 9.83531            | 0.24 | 0.00157855 | 0.240 | 299.209       | 0.128 | 0.999457  | 0.041 | 1            | 3.54E-14               | 1   | APR   | 2020 | 18   | 40  | 1      |
| 20F04646                                                                     | 17.0 % | VS17-065 | Sanidine | Sacramento Butte | FCT-NM (2C38-19) | 28.201           | 0.082 | Kuiper et al (2008) | 9.83531            | 0.24 | 0.00157855 | 0.240 | 299.209       | 0.128 | 0.999457  | 0.041 | 1            | 3.54E-14               | 1   | APR   | 2020 | 18   | 57  | 1      |
| 20F04647                                                                     | 17.0 % | VS17-065 | Sanidine | Sacramento Butte | FCT-NM (2C38-19) | 28.201           | 0.082 | Kuiper et al (2008) | 9.83531            | 0.24 | 0.00157855 | 0.240 | 299.209       | 0.128 | 0.999457  | 0.041 | 1            | 3.54E-14               | 1   | APR   | 2020 | 19   | 6   | 1      |



20F04600.AGE >>> VS17-065 >>> OREGON | S

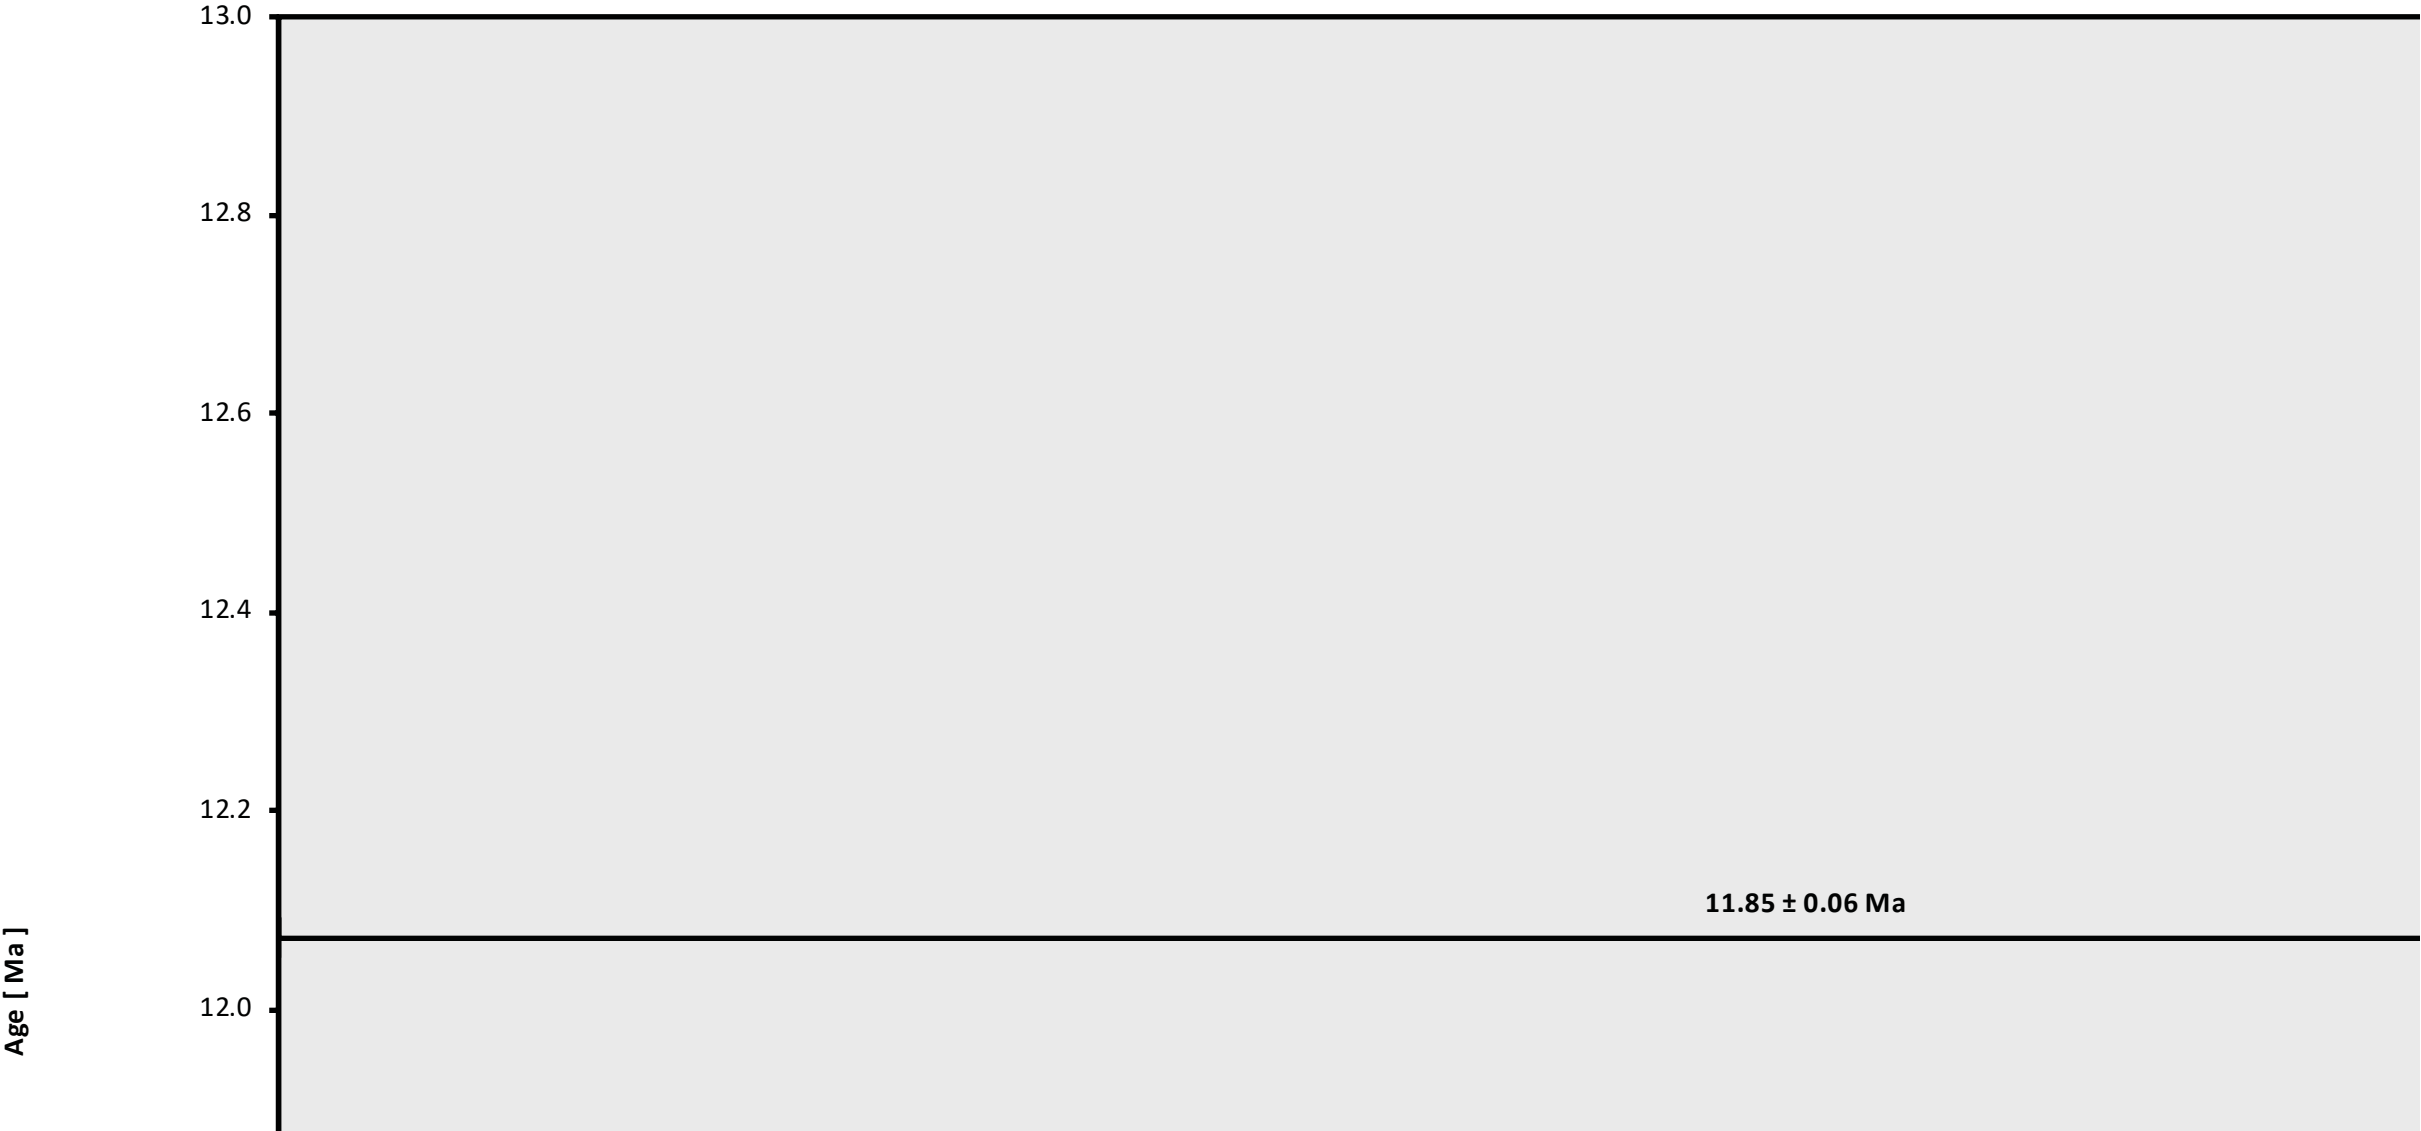

20F04600.AGE >>> VS17-065 >>> OREGON | SWENTON (18-58) PROJECT

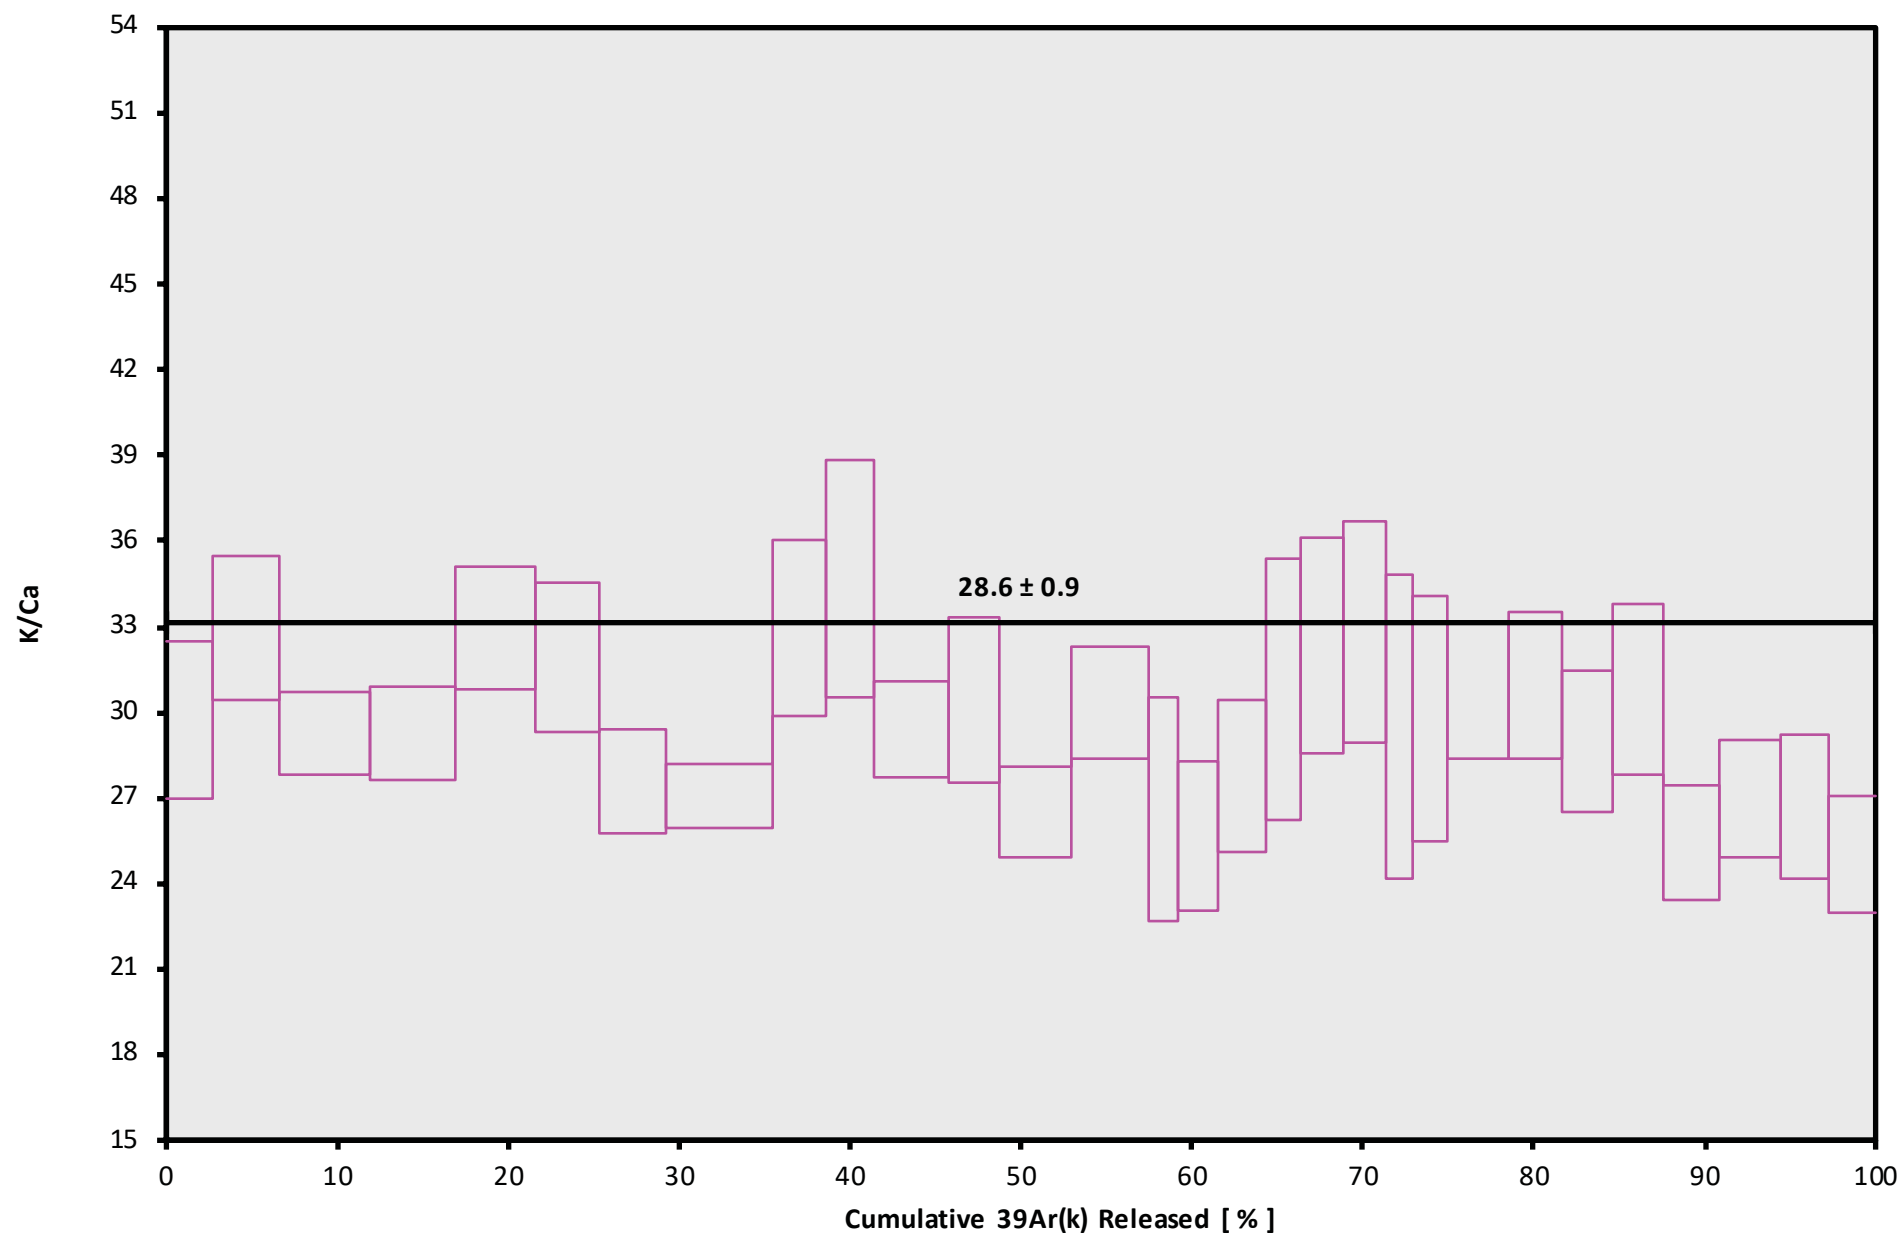

Ar-Ages in Ma

WEIGHTED PLATEAU

$11.85 \pm 0.06$

TOTAL FUSION

$11.86 \pm 0.06$

NORMAL ISOCHRON

$11.85 \pm 0.06$

INVERSE ISOCHRON

$11.85 \pm 0.06$

Sample Info

Sanidine

Sacramento Butte

Dan Miggins

IRR = 19-OSU-02 (2C38-



20F04600.AGE >>> VS17-065 >>> OREGON | SWENTON (18-58) PROJECT

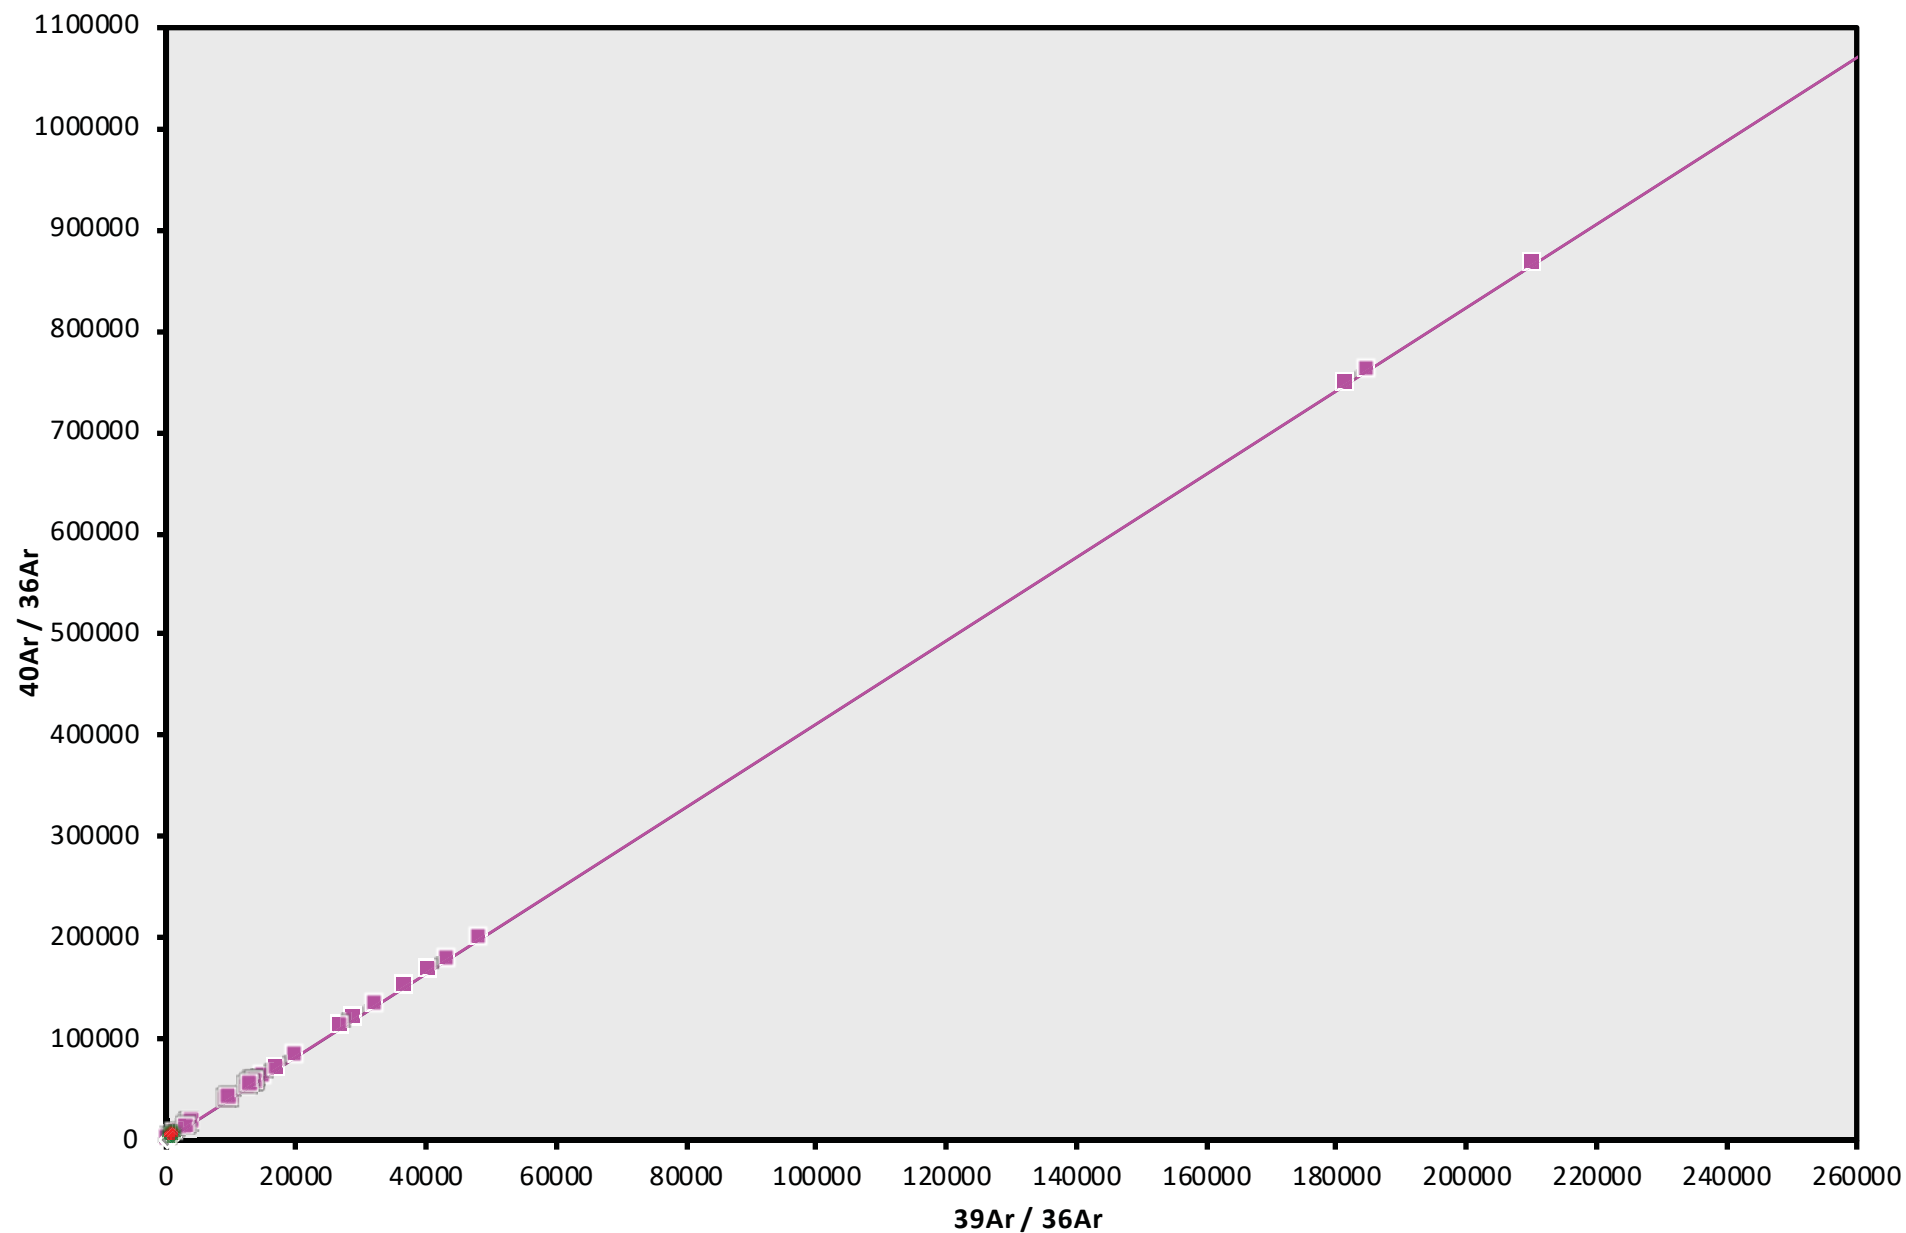

Ar-Ages in Ma

WEIGHTED PLATEAU

$11.85 \pm 0.06$

TOTAL FUSION

$11.86 \pm 0.06$

NORMAL ISOCHRON

$11.85 \pm 0.06$

INVERSE ISOCHRON

$11.85 \pm 0.06$

MSWD (PROBABILITY)

3.54 (0%)

40AR/36AR INTERCEPT

Sample Info

Sanidine

Sacramento Butte

Dan Miggins

IRR = 19-OSU-02 (2C38-

20F04600.AGE >>> VS17-065 >>> OREGON | SWENTON (18-58) PROJECT

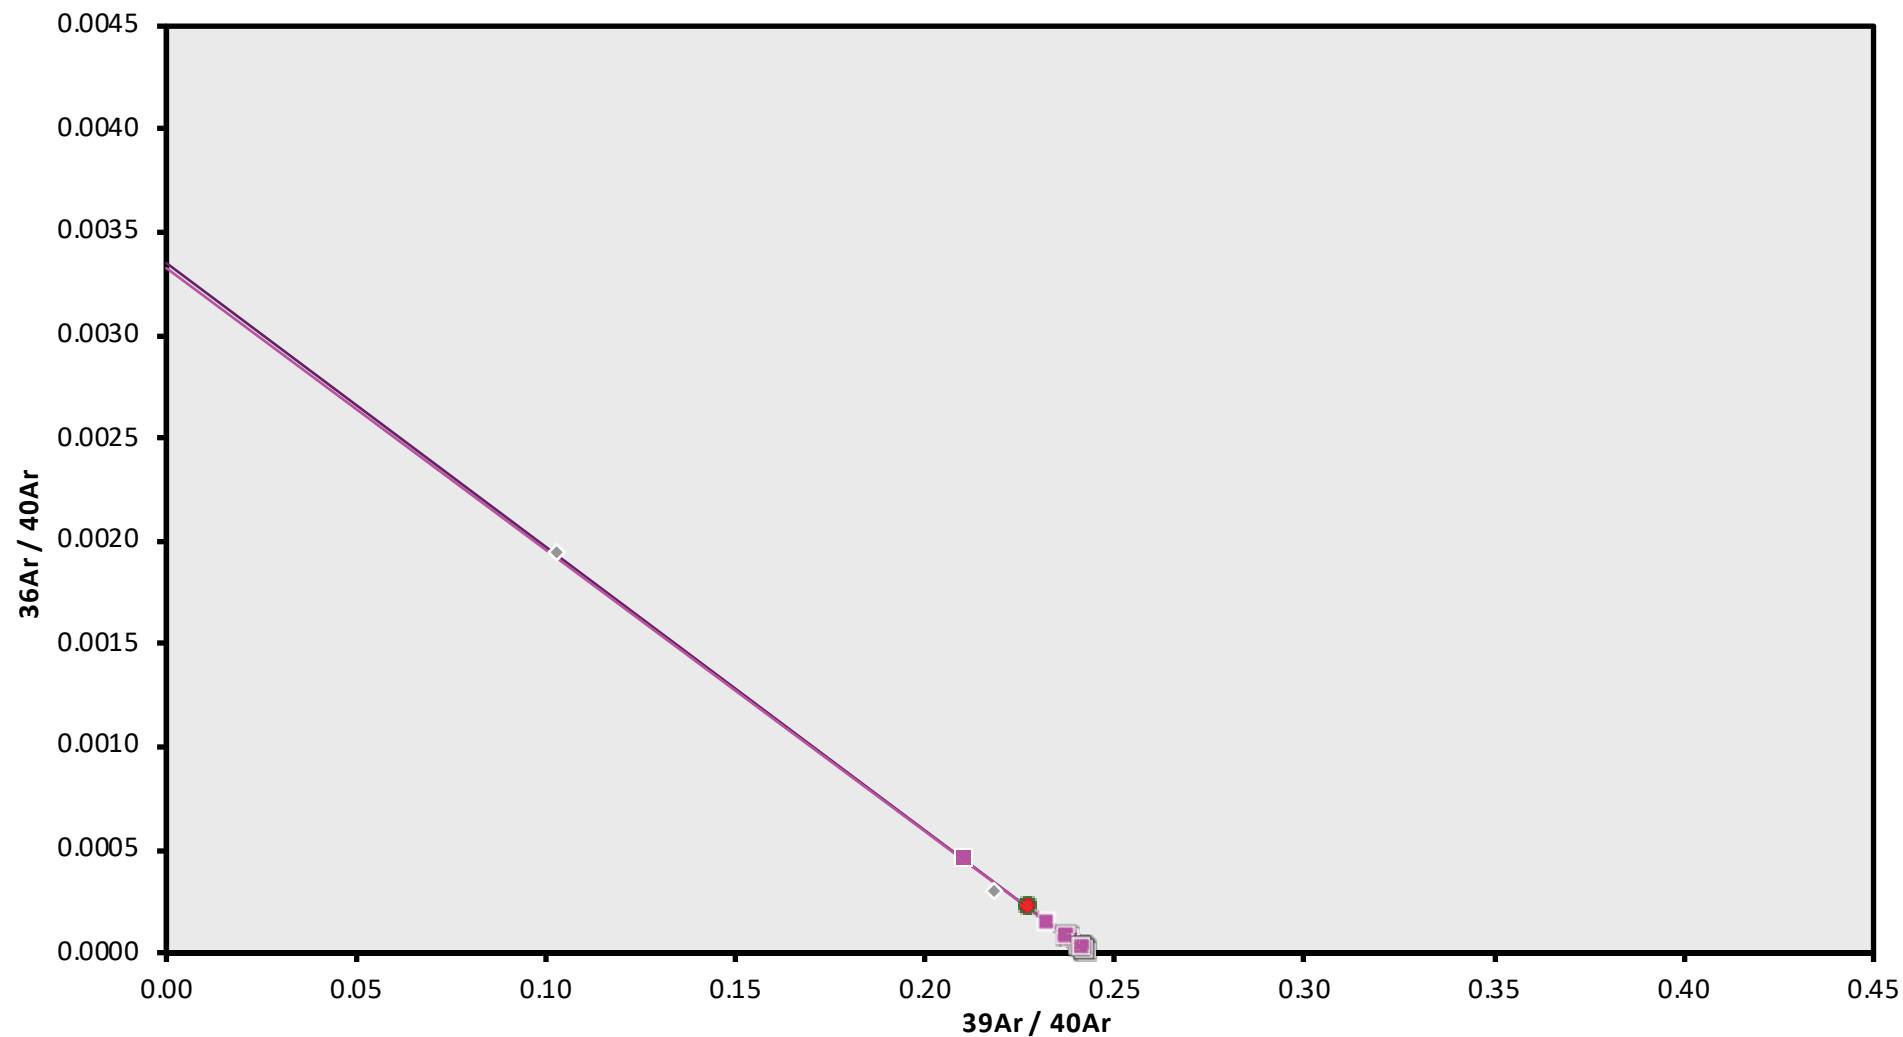

Ar-Ages in Ma

WEIGHTED PLATEAU

$11.85 \pm 0.06$

TOTAL FUSION

$11.86 \pm 0.06$

NORMAL ISOCHRON

$11.85 \pm 0.06$

INVERSE ISOCHRON

$11.85 \pm 0.06$

MSWD (PROBABILITY)

3.54 (0%)

Sample Info

Sanidine

Sacramento Butte

Dan Miggins

| Relative Abundances |        |   | 36Ar<br>[fA] | %1σ     | 37Ar<br>[fA] | %1σ   | 38Ar<br>[fA] | %1σ     | 39Ar<br>[fA] | %1σ   | 40Ar<br>[fA] | %1σ   | 40(r)/39(k) ± 2σ  | Age ± 2σ<br>(Ma) | 40Ar(r)<br>(%) | 39Ar(k)<br>(%) | K/Ca ± 2σ     |
|---------------------|--------|---|--------------|---------|--------------|-------|--------------|---------|--------------|-------|--------------|-------|-------------------|------------------|----------------|----------------|---------------|
| 21F16520            | 24.0 % | ✓ | 1.3208952    | 0.199   | 36.99690     | 0.280 | 0.3735336    | 2.448   | 10.676214    | 0.101 | 447.5471     | 0.008 | 5.27202 ± 0.16615 | 15.90 ± 0.50     | 12.55          | 11.60          | 0.124 ± 0.001 |
| 21F16521            | 24.0 % | ✓ | 0.0533965    | 0.941   | 12.71010     | 0.428 | 0.0692686    | 12.900  | 4.679951     | 0.203 | 38.7044      | 0.060 | 5.09126 ± 0.06856 | 15.35 ± 0.21     | 61.45          | 5.09           | 0.158 ± 0.001 |
| 21F16523            | 24.0 % | ✓ | 0.0992250    | 0.588   | 11.73851     | 0.450 | 0.0775344    | 12.500  | 3.422645     | 0.246 | 46.6006      | 0.053 | 5.24782 ± 0.10764 | 15.82 ± 0.32     | 38.46          | 3.72           | 0.125 ± 0.001 |
| 21F16524            | 24.0 % | ✓ | 0.1062773    | 0.572   | 7.13980      | 0.665 | 0.0500793    | 18.578  | 0.821112     | 1.100 | 35.3777      | 0.070 | 5.17311 ± 0.47023 | 15.60 ± 1.41     | 11.94          | 0.89           | 0.049 ± 0.001 |
| 21F16526            | 24.0 % | ✓ | 0.0784983    | 0.710   | 11.33092     | 0.460 | 0.0657898    | 14.313  | 4.552850     | 0.208 | 46.0554      | 0.052 | 5.17661 ± 0.07776 | 15.61 ± 0.23     | 51.09          | 4.95           | 0.173 ± 0.002 |
| 21F16527            | 24.0 % | ✓ | 0.0157174    | 2.694   | 10.71397     | 0.470 | 0.0401060    | 22.440  | 4.267578     | 0.228 | 25.6674      | 0.096 | 5.12519 ± 0.06488 | 15.46 ± 0.19     | 85.08          | 4.64           | 0.171 ± 0.002 |
| 21F16529            | 24.0 % | ✓ | 0.0193977    | 2.240   | 6.74443      | 0.716 | 0.0537270    | 16.581  | 2.706621     | 0.320 | 18.7601      | 0.122 | 5.00021 ± 0.10275 | 15.08 ± 0.31     | 72.03          | 2.94           | 0.172 ± 0.003 |
| 21F16530            | 24.0 % | ✓ | 0.0335481    | 1.472   | 10.61820     | 0.508 | 0.0588343    | 15.948  | 2.701014     | 0.345 | 22.8447      | 0.101 | 5.07931 ± 0.11647 | 15.32 ± 0.35     | 59.90          | 2.93           | 0.109 ± 0.001 |
| 21F16532            | 24.0 % | ✓ | 0.0031585    | 12.433  | 3.27739      | 1.274 | 0.0015416    | 563.336 | 1.252477     | 0.689 | 7.4116       | 0.328 | 5.38421 ± 0.20552 | 16.23 ± 0.62     | 90.83          | 1.36           | 0.164 ± 0.005 |
| 21F16533            | 24.0 % | ✓ | 0.0041233    | 9.555   | 4.96211      | 0.910 | 0.0250378    | 37.140  | 1.842835     | 0.510 | 10.4601      | 0.228 | 5.23383 ± 0.14110 | 15.78 ± 0.42     | 92.05          | 2.00           | 0.159 ± 0.003 |
| 21F16535            | 24.0 % | ✓ | 0.0187361    | 2.235   | 10.37833     | 0.478 | 0.0261603    | 36.657  | 1.940185     | 0.467 | 14.7530      | 0.163 | 5.16960 ± 0.14047 | 15.59 ± 0.42     | 67.75          | 2.11           | 0.080 ± 0.001 |
| 21F16536            | 24.0 % | ✓ | 0.0161816    | 2.457   | 6.36927      | 0.702 | 0.0187747    | 50.119  | 2.122894     | 0.450 | 15.0710      | 0.166 | 5.07480 ± 0.12343 | 15.30 ± 0.37     | 71.35          | 2.31           | 0.143 ± 0.002 |
| 21F16538            | 24.0 % | ✓ | 0.0390437    | 1.311   | 3.55289      | 1.318 | 0.0282244    | 33.320  | 1.233257     | 0.668 | 18.3278      | 0.126 | 5.65170 ± 0.26307 | 17.04 ± 0.79     | 37.96          | 1.34           | 0.149 ± 0.004 |
| 21F16539            | 24.0 % | ✓ | 0.2535279    | 0.400   | 24.63768     | 0.321 | 0.1243808    | 7.198   | 5.952420     | 0.159 | 104.7802     | 0.023 | 5.23392 ± 0.10698 | 15.78 ± 0.32     | 29.65          | 6.46           | 0.104 ± 0.001 |
| 21F16541            | 24.0 % | ✓ | 0.0688030    | 0.844   | 25.79929     | 0.311 | 0.1367841    | 7.006   | 9.491495     | 0.096 | 67.2313      | 0.036 | 5.14685 ± 0.03851 | 15.52 ± 0.12     | 72.53          | 10.32          | 0.158 ± 0.001 |
| 21F16542            | 24.0 % | ✓ | 0.0208864    | 2.104   | 3.62716      | 1.296 | 0.0349446    | 27.035  | 1.665243     | 0.486 | 14.6747      | 0.155 | 5.25041 ± 0.16834 | 15.83 ± 0.51     | 59.50          | 1.81           | 0.197 ± 0.005 |
| 21F16544            | 24.0 % | ✓ | 0.0325660    | 1.345   | 9.88889      | 0.501 | 0.0245760    | 37.890  | 2.789090     | 0.301 | 23.3426      | 0.099 | 5.18052 ± 0.10068 | 15.62 ± 0.30     | 61.76          | 3.03           | 0.121 ± 0.001 |
| 21F16545            | 24.0 % | ✓ | 0.0415884    | 1.215   | 10.56073     | 0.451 | 0.0457576    | 20.498  | 3.950279     | 0.216 | 32.0614      | 0.077 | 5.19707 ± 0.08102 | 15.67 ± 0.24     | 63.92          | 4.29           | 0.161 ± 0.002 |
| 21F16547            | 24.0 % | ✓ | 0.0033527    | 12.105  | 3.35449      | 1.252 | 0.0201536    | 48.089  | 1.356397     | 0.709 | 7.6901       | 0.290 | 5.13878 ± 0.19610 | 15.50 ± 0.59     | 90.49          | 1.47           | 0.174 ± 0.005 |
| 21F16548            | 24.0 % | ✓ | 0.0541048    | 1.022   | 5.17633      | 0.858 | 0.0294342    | 32.353  | 2.595762     | 0.363 | 28.1752      | 0.082 | 4.79772 ± 0.13384 | 14.47 ± 0.40     | 44.14          | 2.82           | 0.215 ± 0.004 |
| 21F16550            | 24.0 % | ✓ | 0.0085512    | 4.650   | 4.51447      | 0.988 | 0.0172009    | 53.765  | 1.899054     | 0.490 | 12.1549      | 0.195 | 5.25541 ± 0.13780 | 15.85 ± 0.41     | 81.98          | 2.06           | 0.181 ± 0.004 |
| 21F16551            | 24.0 % | ✓ | 0.0291710    | 1.417   | 7.63639      | 0.620 | 0.0352529    | 27.943  | 3.449569     | 0.289 | 25.3682      | 0.092 | 5.01445 ± 0.07865 | 15.12 ± 0.24     | 68.09          | 3.75           | 0.194 ± 0.003 |
| 21F16553            | 24.0 % | ✓ | 0.0002594    | 142.681 | 2.41116      | 1.820 | 0.0047292    | 198.378 | 0.889583     | 0.948 | 4.5894       | 0.498 | 5.29936 ± 0.27349 | 15.98 ± 0.82     | 102.54         | 0.97           | 0.158 ± 0.007 |
| 21F16554            | 24.0 % | ✓ | 0.0072576    | 5.326   | 7.04098      | 0.725 | 0.0450725    | 21.879  | 2.757362     | 0.323 | 15.8877      | 0.158 | 5.19021 ± 0.09223 | 15.65 ± 0.28     | 89.93          | 3.00           | 0.168 ± 0.003 |
| 21F16556            | 24.0 % | ✓ | 0.0002236    | 172.921 | 1.60071      | 2.594 | 0.0066506    | 140.866 | 0.599331     | 1.608 | 2.9079       | 0.862 | 4.96391 ± 0.42619 | 14.97 ± 1.28     | 102.13         | 0.65           | 0.161 ± 0.010 |
| 21F16557            | 24.0 % | ✓ | 0.0155437    | 2.689   | 8.61607      | 0.606 | 0.0247606    | 40.189  | 2.436689     | 0.370 | 16.6305      | 0.143 | 5.21711 ± 0.11154 | 15.73 ± 0.33     | 76.27          | 2.65           | 0.121 ± 0.002 |
| 21F16559            | 24.0 % | ✓ | 0.0031579    | 12.140  | 5.82804      | 0.802 | 0.0138658    | 67.164  | 1.646620     | 0.495 | 8.9684       | 0.255 | 5.17073 ± 0.15116 | 15.59 ± 0.45     | 94.72          | 1.79           | 0.121 ± 0.002 |
| 21F16560            | 24.0 % | ✓ | 0.0177830    | 2.357   | 11.80919     | 0.441 | 0.0253269    | 38.566  | 2.332907     | 0.364 | 16.2398      | 0.143 | 5.10986 ± 0.11578 | 15.41 ± 0.35     | 73.17          | 2.53           | 0.085 ± 0.001 |
| 21F16562            | 24.0 % | ✓ | 0.0119878    | 3.465   | 9.38500      | 0.559 | 0.0562796    | 16.641  | 3.649552     | 0.278 | 21.7065      | 0.114 | 5.18261 ± 0.07524 | 15.63 ± 0.23     | 86.99          | 3.97           | 0.167 ± 0.002 |
| 21F16563            | 24.0 % | ✓ | 0.0061839    | 6.217   | 6.91577      | 0.712 | 0.0123704    | 74.968  | 2.348337     | 0.429 | 13.3538      | 0.178 | 5.14707 ± 0.10943 | 15.52 ± 0.33     | 90.34          | 2.55           | 0.146 ± 0.002 |
| Σ                   |        |   | 2.3831472    | 0.155   | 285.33518    | 0.103 | 1.5461520    | 3.325   | 92.029323    | 0.055 | 1163.3434    | 0.011 |                   |                  |                |                |               |

| Information on Analysis<br>and Constants Used in Calculations                                                                                                                                                                                                                                                                                                                                                                                                                                                                                                                                                                                                                                                                                                                                                                                                                                                                                                                                                                     | Results                                                                                                                                                                                                                                                                         | 40(a)/36(a) ± 2σ                       | 40(r)/39(k) ± 2σ                                                                      | Age ± 2σ<br>(Ma)                      | MSWD                                                     | 39Ar(k)<br>(%,n)                                                                                                      | K/Ca ± 2σ     |
|-----------------------------------------------------------------------------------------------------------------------------------------------------------------------------------------------------------------------------------------------------------------------------------------------------------------------------------------------------------------------------------------------------------------------------------------------------------------------------------------------------------------------------------------------------------------------------------------------------------------------------------------------------------------------------------------------------------------------------------------------------------------------------------------------------------------------------------------------------------------------------------------------------------------------------------------------------------------------------------------------------------------------------------|---------------------------------------------------------------------------------------------------------------------------------------------------------------------------------------------------------------------------------------------------------------------------------|----------------------------------------|---------------------------------------------------------------------------------------|---------------------------------------|----------------------------------------------------------|-----------------------------------------------------------------------------------------------------------------------|---------------|
| Project = <b>SWENTON (20-01)</b><br>Sample = <b>VS19-068</b><br>Material = <b>Plagioclase</b><br>Location = <b>Birch Creek</b><br>Region = <b>Eastern Oregon</b><br>Analyst = <b>Dan Miggins</b><br>Irradiation = <b>21-OSU-04 (4X5-21)</b><br>Position = <b>X: 0   Y: 0   Z/H: 4.13743 mm</b><br>FCT-NM Age = <b>28.201 ± 0.023 Ma</b><br>FCT-NM Reference = <b>Kuiper et al (2008)</b><br>FCT-NM 40Ar/39Ar Ratio = <b>9.38445 ± 0.01060</b><br>FCT-NM J-value = <b>0.00165439 ± 0.00000187</b><br>Air Shot 40Ar/36Ar = <b>300.9620 ± 0.3190</b><br>Air Shot MDF = <b>0.99800215 ± 0.00036876 (LIN)</b><br>Experiment Type = <b>Total Fusion</b><br>Extraction Method = <b>Single Crystal Laser Heating</b><br>Heating = <b>62 sec</b><br>Isolation = <b>1.50 min</b><br>Instrument = <b>ARGUS-VI-F</b><br>Preferred Age = <b>Ideogram Age</b><br>Age Classification = <b>Eruption Age</b><br>IGSN = <b>Undefined</b><br>Rock Class = <b>Undefined</b><br>Lithology = <b>Undefined</b><br>Lat-Lon = <b>Undefined - Undefined</b> | <b>Age Plateau</b><br><b>Error Mean</b><br><br><br><br><br><br><br><br><br><br><b>Total Fusion Age</b><br><br><br><br><br><br><br><br><br><br><b>Normal Isochron</b><br><b>Error Chron</b><br><br><br><br><br><br><br><br><br><br><b>Inverse Isochron</b><br><b>Error Chron</b> |                                        | 5.14665 ± 0.03275<br>± 0.64%<br>Full External Error ± 0.81<br>Analytical Error ± 0.10 | <b>15.52 ± 0.10</b><br><b>± 0.67%</b> | 3.28<br>0%<br>1.53<br>1.8106                             | 100.00<br>30<br>2σ Confidence Limit<br>Error Magnification                                                            | 0.147 ± 0.013 |
|                                                                                                                                                                                                                                                                                                                                                                                                                                                                                                                                                                                                                                                                                                                                                                                                                                                                                                                                                                                                                                   |                                                                                                                                                                                                                                                                                 |                                        | 5.16959 ± 0.02654<br>± 0.51%<br>Full External Error ± 0.81<br>Analytical Error ± 0.08 | <b>15.59 ± 0.09</b><br><b>± 0.56%</b> |                                                          | 30<br>0.138 ± 0.000                                                                                                   |               |
|                                                                                                                                                                                                                                                                                                                                                                                                                                                                                                                                                                                                                                                                                                                                                                                                                                                                                                                                                                                                                                   |                                                                                                                                                                                                                                                                                 | <b>300.10 ± 2.01</b><br><b>± 0.67%</b> | 5.11614 ± 0.04025<br>± 0.79%<br>Full External Error ± 0.81<br>Analytical Error ± 0.12 | <b>15.43 ± 0.13</b><br><b>± 0.82%</b> | 3.41<br>0%<br>1.53<br>1.8470<br>69<br>0.0000510326       | 100.00<br>30<br>2σ Confidence Limit<br>Error Magnification<br>Number of Iterations<br>Convergence                     |               |
|                                                                                                                                                                                                                                                                                                                                                                                                                                                                                                                                                                                                                                                                                                                                                                                                                                                                                                                                                                                                                                   |                                                                                                                                                                                                                                                                                 | <b>299.76 ± 1.96</b><br><b>± 0.65%</b> | 5.13480 ± 0.03880<br>± 0.76%<br>Full External Error ± 0.81<br>Analytical Error ± 0.12 | <b>15.48 ± 0.12</b><br><b>± 0.79%</b> | 3.26<br>0%<br>1.53<br>1.8060<br>3<br>0.0000035663<br>94% | 100.00<br>30<br>2σ Confidence Limit<br>Error Magnification<br>Number of Iterations<br>Convergence<br>Spreading Factor |               |

| Incremental Heating |        |   | 36Ar(a)<br>[fA] | 37Ar(ca)<br>[fA] | 38Ar(cl)<br>[fA] | 39Ar(k)<br>[fA] | 40Ar(r)<br>[fA] | Age ± 2σ<br>(Ma) | 40Ar(r)<br>(%) | 39Ar(k)<br>(%) | K/Ca ± 2σ     |
|---------------------|--------|---|-----------------|------------------|------------------|-----------------|-----------------|------------------|----------------|----------------|---------------|
| 21F16520            | 24.0 % | ✓ | 1.3108950       | 36.99690         | 0.0000000        | 10.652444       | 56.15988        | 15.90 ± 0.50     | 12.55          | 11.60          | 0.124 ± 0.001 |
| 21F16521            | 24.0 % | ✓ | 0.0499608       | 12.71010         | 0.0011420        | 4.671785        | 23.78528        | 15.35 ± 0.21     | 61.45          | 5.09           | 0.158 ± 0.001 |
| 21F16523            | 24.0 % | ✓ | 0.0960500       | 11.73851         | 0.0160718        | 3.415103        | 17.92186        | 15.82 ± 0.32     | 38.46          | 3.72           | 0.125 ± 0.001 |
| 21F16524            | 24.0 % | ✓ | 0.1043449       | 7.13980          | 0.0192640        | 0.816524        | 4.22397         | 15.60 ± 1.41     | 11.94          | 0.89           | 0.049 ± 0.001 |
| 21F16526            | 24.0 % | ✓ | 0.0754356       | 11.33092         | 0.0000000        | 4.545570        | 23.53065        | 15.61 ± 0.23     | 51.09          | 4.95           | 0.173 ± 0.002 |
| 21F16527            | 24.0 % | ✓ | 0.0128214       | 10.71397         | 0.0000000        | 4.260695        | 21.83687        | 15.46 ± 0.19     | 85.08          | 4.64           | 0.171 ± 0.002 |
| 21F16529            | 24.0 % | ✓ | 0.0175725       | 6.74443          | 0.0165650        | 2.702288        | 13.51200        | 15.08 ± 0.31     | 72.03          | 2.94           | 0.172 ± 0.003 |
| 21F16530            | 24.0 % | ✓ | 0.0306755       | 10.61820         | 0.0186029        | 2.694192        | 13.68463        | 15.32 ± 0.35     | 59.90          | 2.93           | 0.109 ± 0.001 |
| 21F16532            | 24.0 % | ✓ | 0.0022727       | 3.27739          | 0.0000000        | 1.250372        | 6.73226         | 16.23 ± 0.62     | 90.83          | 1.36           | 0.164 ± 0.005 |
| 21F16533            | 24.0 % | ✓ | 0.0027818       | 4.96211          | 0.0014028        | 1.839647        | 9.62840         | 15.78 ± 0.42     | 92.05          | 2.00           | 0.159 ± 0.003 |
| 21F16535            | 24.0 % | ✓ | 0.0159309       | 10.37833         | 0.0000000        | 1.933517        | 9.99551         | 15.59 ± 0.42     | 67.75          | 2.11           | 0.080 ± 0.001 |
| 21F16536            | 24.0 % | ✓ | 0.0144600       | 6.36927          | 0.0000000        | 2.118802        | 10.75250        | 15.30 ± 0.37     | 71.35          | 2.31           | 0.143 ± 0.002 |
| 21F16538            | 24.0 % | ✓ | 0.0380827       | 3.55289          | 0.0055398        | 1.230974        | 6.95710         | 17.04 ± 0.79     | 37.96          | 1.34           | 0.149 ± 0.004 |
| 21F16539            | 24.0 % | ✓ | 0.2468681       | 24.63768         | 0.0017152        | 5.936590        | 31.07166        | 15.78 ± 0.32     | 29.65          | 6.46           | 0.104 ± 0.001 |
| 21F16541            | 24.0 % | ✓ | 0.0618287       | 25.79929         | 0.0060569        | 9.474919        | 48.76594        | 15.52 ± 0.12     | 72.53          | 10.32          | 0.158 ± 0.001 |
| 21F16542            | 24.0 % | ✓ | 0.0199046       | 3.62716          | 0.0104567        | 1.662913        | 8.73098         | 15.83 ± 0.51     | 59.50          | 1.81           | 0.197 ± 0.005 |
| 21F16544            | 24.0 % | ✓ | 0.0298930       | 9.88889          | 0.0000000        | 2.782737        | 14.41603        | 15.62 ± 0.30     | 61.76          | 3.03           | 0.121 ± 0.001 |
| 21F16545            | 24.0 % | ✓ | 0.0387339       | 10.56073         | 0.0000000        | 3.943494        | 20.49459        | 15.67 ± 0.24     | 63.92          | 4.29           | 0.161 ± 0.002 |
| 21F16547            | 24.0 % | ✓ | 0.0024456       | 3.35449          | 0.0027336        | 1.354242        | 6.95915         | 15.50 ± 0.59     | 90.49          | 1.47           | 0.174 ± 0.005 |
| 21F16548            | 24.0 % | ✓ | 0.0527057       | 5.17633          | 0.0000000        | 2.592436        | 12.43778        | 14.47 ± 0.40     | 44.14          | 2.82           | 0.215 ± 0.004 |
| 21F16550            | 24.0 % | ✓ | 0.0073310       | 4.51447          | 0.0000000        | 1.896153        | 9.96505         | 15.85 ± 0.41     | 81.98          | 2.06           | 0.181 ± 0.004 |
| 21F16551            | 24.0 % | ✓ | 0.0271069       | 7.63639          | 0.0000000        | 3.444663        | 17.27309        | 15.12 ± 0.24     | 68.09          | 3.75           | 0.194 ± 0.003 |
| 21F16553            | 24.0 % | ✓ | 0.0003923       | 2.41116          | 0.0000000        | 0.888034        | 4.70601         | 15.98 ± 0.82     | 102.54         | 0.97           | 0.158 ± 0.007 |
| 21F16554            | 24.0 % | ✓ | 0.0053532       | 7.04098          | 0.0095500        | 2.752838        | 14.28780        | 15.65 ± 0.28     | 89.93          | 3.00           | 0.168 ± 0.003 |
| 21F16556            | 24.0 % | ✓ | 0.0002090       | 1.60071          | 0.0000000        | 0.598303        | 2.96992         | 14.97 ± 1.28     | 102.13         | 0.65           | 0.161 ± 0.010 |
| 21F16557            | 24.0 % | ✓ | 0.0132148       | 8.61607          | 0.0000000        | 2.431153        | 12.68358        | 15.73 ± 0.33     | 76.27          | 2.65           | 0.121 ± 0.002 |
| 21F16559            | 24.0 % | ✓ | 0.0015826       | 5.82804          | 0.0000000        | 1.642875        | 8.49486         | 15.59 ± 0.45     | 94.72          | 1.79           | 0.121 ± 0.002 |
| 21F16560            | 24.0 % | ✓ | 0.0145910       | 11.80919         | 0.0000000        | 2.325319        | 11.88206        | 15.41 ± 0.35     | 73.17          | 2.53           | 0.085 ± 0.001 |
| 21F16562            | 24.0 % | ✓ | 0.0094499       | 9.38500          | 0.0088062        | 3.643522        | 18.88297        | 15.63 ± 0.23     | 86.99          | 3.97           | 0.167 ± 0.002 |
| 21F16563            | 24.0 % | ✓ | 0.0043145       | 6.91577          | 0.0000000        | 2.343894        | 12.06418        | 15.52 ± 0.33     | 90.34          | 2.55           | 0.146 ± 0.002 |
| Σ                   |        |   | 2.3060057       | 285.33518        | 0.1179069        | 91.845995       | 474.80658       |                  |                |                |               |

| Information on Analysis                                                                                                                                                                                                                                 | Results                   | 40(r)/39(k) ± 2σ             | Age ± 2σ<br>(Ma)                                      | MSWD           | 39Ar(k)<br>(%,n)                           | K/Ca ± 2σ     |
|---------------------------------------------------------------------------------------------------------------------------------------------------------------------------------------------------------------------------------------------------------|---------------------------|------------------------------|-------------------------------------------------------|----------------|--------------------------------------------|---------------|
| Project = SWENTON (20-01)<br>Sample = VS19-068<br>Material = Plagioclase<br>Location = Birch Creek<br>Region = Eastern Oregon<br>Analyst = Dan Miggins<br>Irradiation = 21-OSU-04 (4X5-21)<br>J = 0.00165439 ± 0.00000187<br>FCT-NM = 28.201 ± 0.023 Ma | Age Plateau<br>Error Mean | 5.14665 ± 0.03275<br>± 0.64% | 15.52 ± 0.10<br>± 0.67%                               | 3.28<br>0%     | 100.00<br>30                               | 0.147 ± 0.013 |
|                                                                                                                                                                                                                                                         |                           |                              | Full External Error ± 0.81<br>Analytical Error ± 0.10 | 1.53<br>1.8106 | 2σ Confidence Limit<br>Error Magnification |               |
|                                                                                                                                                                                                                                                         | Total Fusion Age          | 5.16959 ± 0.02654<br>± 0.51% | 15.59 ± 0.09<br>± 0.56%                               |                | 30                                         | 0.138 ± 0.000 |
|                                                                                                                                                                                                                                                         |                           |                              | Full External Error ± 0.81<br>Analytical Error ± 0.08 |                |                                            |               |

| Normal Isochron |        |   | 39(k)/36(a) ± 2σ   | 40(a+r)/36(a) ± 2σ  | r.i.   |
|-----------------|--------|---|--------------------|---------------------|--------|
| 21F16520        | 24.0 % | ✓ | 8.13 ± 0.04        | 341.40 ± 1.37       | 0.8912 |
| 21F16521        | 24.0 % | ✓ | 93.51 ± 1.92       | 774.64 ± 15.61      | 0.9784 |
| 21F16523        | 24.0 % | ✓ | 35.56 ± 0.47       | 485.15 ± 5.92       | 0.9231 |
| 21F16524        | 24.0 % | ✓ | 7.83 ± 0.20        | 339.04 ± 3.98       | 0.4628 |
| 21F16526        | 24.0 % | ✓ | 60.26 ± 0.93       | 610.49 ± 9.05       | 0.9603 |
| 21F16527        | 24.0 % | ✓ | 332.31 ± 22.01     | 2001.72 ± 132.34    | 0.9972 |
| 21F16529        | 24.0 % | ✓ | 153.78 ± 7.67      | 1067.49 ± 52.87     | 0.9905 |
| 21F16530        | 24.0 % | ✓ | 87.83 ± 2.89       | 744.67 ± 24.03      | 0.9758 |
| 21F16532        | 24.0 % | ✓ | 550.18 ± 190.36    | 3260.83 ± 1127.55   | 0.9990 |
| 21F16533        | 24.0 % | ✓ | 661.31 ± 187.53    | 3759.74 ± 1065.62   | 0.9992 |
| 21F16535        | 24.0 % | ✓ | 121.37 ± 6.48      | 925.99 ± 48.80      | 0.9826 |
| 21F16536        | 24.0 % | ✓ | 146.53 ± 8.17      | 1042.16 ± 57.43     | 0.9850 |
| 21F16538        | 24.0 % | ✓ | 32.32 ± 0.97       | 481.24 ± 13.00      | 0.8914 |
| 21F16539        | 24.0 % | ✓ | 24.05 ± 0.21       | 424.42 ± 3.50       | 0.9306 |
| 21F16541        | 24.0 % | ✓ | 153.24 ± 2.90      | 1087.29 ± 20.45     | 0.9941 |
| 21F16542        | 24.0 % | ✓ | 83.54 ± 3.78       | 737.20 ± 32.65      | 0.9742 |
| 21F16544        | 24.0 % | ✓ | 93.09 ± 2.79       | 780.81 ± 22.94      | 0.9772 |
| 21F16545        | 24.0 % | ✓ | 101.81 ± 2.69      | 827.67 ± 21.65      | 0.9848 |
| 21F16547        | 24.0 % | ✓ | 553.75 ± 184.03    | 3144.17 ± 1044.11   | 0.9989 |
| 21F16548        | 24.0 % | ✓ | 49.19 ± 1.09       | 534.55 ± 11.25      | 0.9420 |
| 21F16550        | 24.0 % | ✓ | 258.65 ± 28.19     | 1657.87 ± 180.05    | 0.9953 |
| 21F16551        | 24.0 % | ✓ | 127.08 ± 3.95      | 935.78 ± 28.60      | 0.9807 |
| 21F16553        | 24.0 % | ✓ | 2263.56 ± 4273.68  | 11696.87 ± 22083.26 | 0.9999 |
| 21F16554        | 24.0 % | ✓ | 514.24 ± 74.40     | 2967.57 ± 428.99    | 0.9988 |
| 21F16556        | 24.0 % | ✓ | 2862.03 ± 10593.02 | 13908.30 ± 51476.38 | 1.0000 |
| 21F16557        | 24.0 % | ✓ | 183.97 ± 11.72     | 1258.36 ± 79.72     | 0.9922 |
| 21F16559        | 24.0 % | ✓ | 1038.08 ± 503.34   | 5666.21 ± 2746.97   | 0.9997 |
| 21F16560        | 24.0 % | ✓ | 159.37 ± 9.23      | 1112.90 ± 64.05     | 0.9908 |
| 21F16562        | 24.0 % | ✓ | 385.56 ± 33.98     | 2296.78 ± 202.10    | 0.9977 |
| 21F16563        | 24.0 % | ✓ | 543.25 ± 96.99     | 3094.72 ± 551.99    | 0.9986 |

| Results         | 40(a)/36(a) ± 2σ      | 40(r)/39(k) ± 2σ  | Age ± 2σ (Ma)              | MSWD            |
|-----------------|-----------------------|-------------------|----------------------------|-----------------|
| Normal Isochron | 300.10 ± 2.01         | 5.11614 ± 0.04025 | 15.43 ± 0.13               | 3.41            |
| Error Chron     | ± 0.67%               | ± 0.79%           | ± 0.82%                    | 0%              |
|                 |                       |                   | Full External Error ± 0.81 |                 |
|                 |                       |                   | Analytical Error ± 0.12    |                 |
| Statistics      | 2σ Confidence Limit   | 1.53              | Convergence                | 0.000051032599  |
|                 | Error Magnification   | 1.8470            | Number of Iterations       | 69              |
|                 | Number of Data Points | 30                | Calculated Line            | Weighted York-2 |

| Inverse Isochron |        |   | 39(k)/40(a+r) ± 2σ    | 36(a)/40(a+r) ± 2σ      | r.i.   |
|------------------|--------|---|-----------------------|-------------------------|--------|
| 21F16520         | 24.0 % | ✓ | 0.0238022 ± 0.0000484 | 0.00292911 ± 0.00001173 | 0.0032 |
| 21F16521         | 24.0 % | ✓ | 0.1207130 ± 0.0005127 | 0.00129092 ± 0.00002602 | 0.0168 |
| 21F16523         | 24.0 % | ✓ | 0.0732878 ± 0.0003696 | 0.00206122 ± 0.00002513 | 0.0181 |
| 21F16524         | 24.0 % | ✓ | 0.0230805 ± 0.0005119 | 0.00294950 ± 0.00003465 | 0.0076 |
| 21F16526         | 24.0 % | ✓ | 0.0987037 ± 0.0004231 | 0.00163803 ± 0.00002428 | 0.0170 |
| 21F16527         | 24.0 % | ✓ | 0.1660131 ± 0.0008217 | 0.00049957 ± 0.00003303 | 0.0112 |
| 21F16529         | 24.0 % | ✓ | 0.1440571 ± 0.0009888 | 0.00093678 ± 0.00004640 | 0.0177 |
| 21F16530         | 24.0 % | ✓ | 0.1179433 ± 0.0008497 | 0.00134288 ± 0.00004334 | 0.0175 |
| 21F16532         | 24.0 % | ✓ | 0.1687231 ± 0.0025795 | 0.00030667 ± 0.00010604 | 0.0082 |
| 21F16533         | 24.0 % | ✓ | 0.1758923 ± 0.0019697 | 0.00026598 ± 0.00007539 | 0.0066 |
| 21F16535         | 24.0 % | ✓ | 0.1310697 ± 0.0013009 | 0.00107992 ± 0.00005691 | 0.0202 |
| 21F16536         | 24.0 % | ✓ | 0.1406002 ± 0.0013516 | 0.00095954 ± 0.00005288 | 0.0209 |
| 21F16538         | 24.0 % | ✓ | 0.0671670 ± 0.0009144 | 0.00207795 ± 0.00005613 | 0.0174 |
| 21F16539         | 24.0 % | ✓ | 0.0566595 ± 0.0001831 | 0.00235614 ± 0.00001941 | 0.0081 |
| 21F16541         | 24.0 % | ✓ | 0.1409423 ± 0.0002901 | 0.00091972 ± 0.00001730 | 0.0137 |
| 21F16542         | 24.0 % | ✓ | 0.1133260 ± 0.0011567 | 0.00135648 ± 0.00006008 | 0.0211 |
| 21F16544         | 24.0 % | ✓ | 0.1192215 ± 0.0007578 | 0.00128071 ± 0.00003763 | 0.0210 |
| 21F16545         | 24.0 % | ✓ | 0.1230075 ± 0.0005661 | 0.00120821 ± 0.00003160 | 0.0199 |
| 21F16547         | 24.0 % | ✓ | 0.1761202 ± 0.0027011 | 0.00031805 ± 0.00010562 | 0.0066 |
| 21F16548         | 24.0 % | ✓ | 0.0920166 ± 0.0006857 | 0.00187075 ± 0.00003937 | 0.0174 |
| 21F16550         | 24.0 % | ✓ | 0.1560133 ± 0.0016483 | 0.00060318 ± 0.00006551 | 0.0132 |
| 21F16551         | 24.0 % | ✓ | 0.1357977 ± 0.0008241 | 0.00106863 ± 0.00003266 | 0.0181 |
| 21F16553         | 24.0 % | ✓ | 0.1935186 ± 0.0041512 | 0.00008549 ± 0.00016141 | 0.0025 |
| 21F16554         | 24.0 % | ✓ | 0.1732864 ± 0.0012492 | 0.00033698 ± 0.00004871 | 0.0096 |
| 21F16556         | 24.0 % | ✓ | 0.2057786 ± 0.0075170 | 0.00007190 ± 0.00026611 | 0.0022 |
| 21F16557         | 24.0 % | ✓ | 0.1461996 ± 0.0011630 | 0.00079468 ± 0.00005034 | 0.0162 |
| 21F16559         | 24.0 % | ✓ | 0.1832060 ± 0.0020450 | 0.00017648 ± 0.00008556 | 0.0048 |
| 21F16560         | 24.0 % | ✓ | 0.1431992 ± 0.0011240 | 0.00089855 ± 0.00005171 | 0.0182 |
| 21F16562         | 24.0 % | ✓ | 0.1678708 ± 0.0010109 | 0.00043539 ± 0.00003831 | 0.0098 |
| 21F16563         | 24.0 % | ✓ | 0.1755419 ± 0.0016333 | 0.00032313 ± 0.00005764 | 0.0077 |

| Results          | 40(a)/36(a) ± 2σ      | 40(r)/39(k) ± 2σ  | Age ± 2σ (Ma)              | MSWD            |
|------------------|-----------------------|-------------------|----------------------------|-----------------|
| Inverse Isochron | 299.76 ± 1.96         | 5.13480 ± 0.03880 | 15.48 ± 0.12               | 3.26            |
| Error Chron      | ± 0.65%               | ± 0.76%           | ± 0.79%                    | 0%              |
|                  |                       |                   | Full External Error ± 0.81 |                 |
|                  |                       |                   | Analytical Error ± 0.12    |                 |
| Statistics       | 2σ Confidence Limit   | 1.53              | Convergence                | 0.0000035663    |
|                  | Error Magnification   | 1.8060            | Number of Iterations       | 3               |
|                  | Number of Data Points | 30                | Calculated Line            | Weighted York-2 |
|                  | Spreading Factor      | 93.8%             |                            |                 |

| Degassing Patterns |        |   | 36Ar(a)<br>[fA] | %1σ    | 36Ar(c)<br>[fA] | %1σ  | 36Ar(ca)<br>[fA] | %1σ  | 36Ar(cl)<br>[fA] | %1σ    | 37Ar(ca)<br>[fA] | %1σ  | 38Ar(a)<br>[fA] | %1σ    | 38Ar(c)<br>[fA] | %1σ  | 38Ar(k)<br>[fA] | %1σ  | 38Ar(ca)<br>[fA] | %1σ  | 38Ar(cl)<br>[fA] | %1σ    | 39Ar(k)<br>[fA] | %1σ  | 39Ar(ca)<br>[fA] | %1σ  | 40Ar(r)<br>[fA] | %1σ  | 40Ar(a)<br>[fA] | %1σ    | 40Ar(c)<br>[fA] | %1σ  | 40Ar(k)<br>[fA] | %1σ  |
|--------------------|--------|---|-----------------|--------|-----------------|------|------------------|------|------------------|--------|------------------|------|-----------------|--------|-----------------|------|-----------------|------|------------------|------|------------------|--------|-----------------|------|------------------|------|-----------------|------|-----------------|--------|-----------------|------|-----------------|------|
| 21F16520           | 24.0 % | ✓ | 1.3108950       | 0.20   | 0.0000000       | 0.00 | 0.0100003        | 0.33 | 0.0000000        | 0.00   | 36.99690         | 0.28 | 0.2471037       | 0.26   | 0.0000000       | 0.00 | 0.1286496       | 0.14 | 0.0066594        | 9.63 | 0.0000000        | 0.00   | 10.652444       | 0.10 | 0.0237705        | 0.96 | 56.15988        | 1.57 | 391.38080       | 0.23   | 0.0000000       | 0.00 | 0.0064660       | 9.65 |
| 21F16521           | 24.0 % | ✓ | 0.0499608       | 1.01   | 0.0000000       | 0.00 | 0.0034355        | 0.46 | 0.0000001        | 782.91 | 12.71010         | 0.43 | 0.0094176       | 1.02   | 0.0000000       | 0.00 | 0.0564211       | 0.22 | 0.0022878        | 9.64 | 0.0011420        | 782.91 | 4.671785        | 0.20 | 0.0081662        | 1.01 | 23.78528        | 0.64 | 14.91629        | 1.01   | 0.0000000       | 0.00 | 0.0028358       | 9.65 |
| 21F16523           | 24.0 % | ✓ | 0.0960500       | 0.61   | 0.0000000       | 0.00 | 0.0031729        | 0.48 | 0.0000021        | 60.34  | 11.73851         | 0.45 | 0.0181054       | 0.63   | 0.0000000       | 0.00 | 0.0412442       | 0.26 | 0.0021129        | 9.64 | 0.0160718        | 60.35  | 3.415103        | 0.25 | 0.0075420        | 1.02 | 17.92186        | 1.00 | 28.67668        | 0.62   | 0.0000000       | 0.00 | 0.0020730       | 9.65 |
| 21F16524           | 24.0 % | ✓ | 0.1043449       | 0.58   | 0.0000000       | 0.00 | 0.0019299        | 0.69 | 0.0000025        | 48.32  | 7.13980          | 0.66 | 0.0196690       | 0.60   | 0.0000000       | 0.00 | 0.0098612       | 1.11 | 0.0012852        | 9.65 | 0.0192640        | 48.33  | 0.816524        | 1.11 | 0.0045873        | 1.13 | 4.22397         | 4.41 | 31.15320        | 0.59   | 0.0000000       | 0.00 | 0.0004956       | 9.71 |
| 21F16526           | 24.0 % | ✓ | 0.0754356       | 0.74   | 0.0000000       | 0.00 | 0.0030627        | 0.49 | 0.0000000        | 0.00   | 11.33092         | 0.46 | 0.0142196       | 0.76   | 0.0000000       | 0.00 | 0.0548968       | 0.23 | 0.0020396        | 9.64 | 0.0000000        | 0.00   | 4.545570        | 0.21 | 0.0072801        | 1.03 | 23.53065        | 0.72 | 22.52204        | 0.75   | 0.0000000       | 0.00 | 0.0027592       | 9.65 |
| 21F16527           | 24.0 % | ✓ | 0.0128214       | 3.30   | 0.0000000       | 0.00 | 0.0028960        | 0.50 | 0.0000000        | 0.00   | 10.71397         | 0.47 | 0.0024168       | 3.31   | 0.0000000       | 0.00 | 0.0514564       | 0.25 | 0.0019285        | 9.64 | 0.0000000        | 0.00   | 4.260695        | 0.23 | 0.0068837        | 1.03 | 21.83687        | 0.59 | 3.82795         | 3.31   | 0.0000000       | 0.00 | 0.0025862       | 9.65 |
| 21F16529           | 24.0 % | ✓ | 0.0175725       | 2.47   | 0.0000000       | 0.00 | 0.0018230        | 0.74 | 0.0000022        | 53.80  | 6.74443          | 0.72 | 0.0033124       | 2.48   | 0.0000000       | 0.00 | 0.0326355       | 0.33 | 0.0012140        | 9.66 | 0.0165650        | 53.81  | 2.702288        | 0.32 | 0.0043333        | 1.17 | 13.51200        | 0.98 | 5.24644         | 2.48   | 0.0000000       | 0.00 | 0.0016403       | 9.66 |
| 21F16530           | 24.0 % | ✓ | 0.0306755       | 1.61   | 0.0000000       | 0.00 | 0.0028701        | 0.54 | 0.0000024        | 50.47  | 10.61820         | 0.51 | 0.0057823       | 1.62   | 0.0000000       | 0.00 | 0.0325378       | 0.36 | 0.0019113        | 9.64 | 0.0186029        | 50.48  | 2.694192        | 0.35 | 0.0068222        | 1.05 | 13.68463        | 1.09 | 9.15849         | 1.61   | 0.0000000       | 0.00 | 0.0016354       | 9.66 |
| 21F16532           | 24.0 % | ✓ | 0.0022727       | 17.29  | 0.0000000       | 0.00 | 0.0008859        | 1.29 | 0.0000000        | 0.00   | 3.27739          | 1.27 | 0.0004284       | 17.29  | 0.0000000       | 0.00 | 0.0151007       | 0.70 | 0.0005899        | 9.71 | 0.0000000        | 0.00   | 1.250372        | 0.69 | 0.0021057        | 1.57 | 6.73226         | 1.78 | 0.67853         | 17.29  | 0.0000000       | 0.00 | 0.0007590       | 9.67 |
| 21F16533           | 24.0 % | ✓ | 0.0027818       | 14.17  | 0.0000000       | 0.00 | 0.0013413        | 0.93 | 0.0000002        | 663.01 | 4.96211          | 0.91 | 0.0005244       | 14.17  | 0.0000000       | 0.00 | 0.0222174       | 0.52 | 0.0008932        | 9.67 | 0.0014028        | 663.01 | 1.839647        | 0.51 | 0.0031882        | 1.29 | 9.62840         | 1.25 | 0.83054         | 14.17  | 0.0000000       | 0.00 | 0.0011167       | 9.66 |
| 21F16535           | 24.0 % | ✓ | 0.0159309       | 2.63   | 0.0000000       | 0.00 | 0.0028053        | 0.51 | 0.0000000        | 0.00   | 10.37833         | 0.48 | 0.0030030       | 2.63   | 0.0000000       | 0.00 | 0.0233511       | 0.48 | 0.0018681        | 9.64 | 0.0000000        | 0.00   | 1.933517        | 0.47 | 0.0066681        | 1.04 | 9.99551         | 1.28 | 4.75632         | 2.63   | 0.0000000       | 0.00 | 0.0011736       | 9.66 |
| 21F16536           | 24.0 % | ✓ | 0.0144600       | 2.75   | 0.0000000       | 0.00 | 0.0017216        | 0.72 | 0.0000000        | 0.00   | 6.36927          | 0.70 | 0.0027257       | 2.75   | 0.0000000       | 0.00 | 0.0255888       | 0.46 | 0.0011465        | 9.66 | 0.0000000        | 0.00   | 2.118802        | 0.45 | 0.0040923        | 1.16 | 10.75250        | 1.13 | 4.31718         | 2.75   | 0.0000000       | 0.00 | 0.0012861       | 9.66 |
| 21F16538           | 24.0 % | ✓ | 0.0380827       | 1.34   | 0.0000000       | 0.00 | 0.0009603        | 1.33 | 0.0000007        | 169.79 | 3.55289          | 1.32 | 0.0071786       | 1.35   | 0.0000000       | 0.00 | 0.0148665       | 0.67 | 0.0006395        | 9.72 | 0.0055398        | 169.80 | 1.230974        | 0.67 | 0.0022827        | 1.61 | 6.95710         | 2.23 | 11.36996        | 1.35   | 0.0000000       | 0.00 | 0.0007472       | 9.67 |
| 21F16539           | 24.0 % | ✓ | 0.2468681       | 0.41   | 0.0000000       | 0.00 | 0.0066596        | 0.36 | 0.0000002        | 522.92 | 24.63768         | 0.32 | 0.0465346       | 0.44   | 0.0000000       | 0.00 | 0.0716962       | 0.18 | 0.0044348        | 9.64 | 0.0017152        | 522.92 | 5.936590        | 0.16 | 0.0158297        | 0.97 | 31.07166        | 1.01 | 73.70495        | 0.42   | 0.0000000       | 0.00 | 0.0036035       | 9.65 |
| 21F16541           | 24.0 % | ✓ | 0.0618287       | 0.94   | 0.0000000       | 0.00 | 0.0069735        | 0.35 | 0.0000008        | 158.50 | 25.79929         | 0.31 | 0.0116547       | 0.95   | 0.0000000       | 0.00 | 0.1144286       | 0.13 | 0.0046439        | 9.64 | 0.0060569        | 158.51 | 9.474919        | 0.10 | 0.0165760        | 0.97 | 48.76594        | 0.36 | 18.45956        | 0.95   | 0.0000000       | 0.00 | 0.0057513       | 9.65 |
| 21F16542           | 24.0 % | ✓ | 0.0199046       | 2.21   | 0.0000000       | 0.00 | 0.0009804        | 1.31 | 0.0000014        | 90.37  | 3.62716          | 1.30 | 0.0037520       | 2.21   | 0.0000000       | 0.00 | 0.0200830       | 0.49 | 0.0006529        | 9.72 | 0.0104567        | 90.37  | 1.662913        | 0.49 | 0.0023304        | 1.59 | 8.73098         | 1.53 | 5.94272         | 2.21   | 0.0000000       | 0.00 | 0.0010094       | 9.66 |
| 21F16544           | 24.0 % | ✓ | 0.0298930       | 1.47   | 0.0000000       | 0.00 | 0.0026730        | 0.53 | 0.0000000        | 0.00   | 9.88889          | 0.50 | 0.0056348       | 1.47   | 0.0000000       | 0.00 | 0.0336071       | 0.32 | 0.0017800        | 9.64 | 0.0000000        | 0.00   | 2.782737        | 0.30 | 0.0063536        | 1.05 | 14.41603        | 0.92 | 8.92486         | 1.47   | 0.0000000       | 0.00 | 0.0016891       | 9.65 |
| 21F16545           | 24.0 % | ✓ | 0.0387339       | 1.31   | 0.0000000       | 0.00 | 0.0028546        | 0.48 | 0.0000000        | 0.00   | 10.56073         | 0.45 | 0.0073013       | 1.32   | 0.0000000       | 0.00 | 0.0476256       | 0.23 | 0.0019009        | 9.64 | 0.0000000        | 0.00   | 3.943494        | 0.22 | 0.0067853        | 1.02 | 20.49459        | 0.75 | 11.56438        | 1.31   | 0.0000000       | 0.00 | 0.0023937       | 9.65 |
| 21F16547           | 24.0 % | ✓ | 0.0024456       | 16.60  | 0.0000000       | 0.00 | 0.0009067        | 1.26 | 0.0000004        | 354.59 | 3.35449          | 1.25 | 0.0004610       | 16.60  | 0.0000000       | 0.00 | 0.0163552       | 0.72 | 0.0006038        | 9.71 | 0.0027336        | 354.59 | 1.354242        | 0.71 | 0.0021553        | 1.55 | 6.95915         | 1.77 | 0.73015         | 16.60  | 0.0000000       | 0.00 | 0.0008220       | 9.68 |
| 21F16548           | 24.0 % | ✓ | 0.0527057       | 1.05   | 0.0000000       | 0.00 | 0.0013992        | 0.87 | 0.0000000        | 0.00   | 5.17633          | 0.86 | 0.0099350       | 1.06   | 0.0000000       | 0.00 | 0.0313089       | 0.37 | 0.0009317        | 9.67 | 0.0000000        | 0.00   | 2.592436        | 0.36 | 0.0033258        | 1.26 | 12.43778        | 1.35 | 15.73581        | 1.05   | 0.0000000       | 0.00 | 0.0015736       | 9.66 |
| 21F16550           | 24.0 % | ✓ | 0.0073310       | 5.43   | 0.0000000       | 0.00 | 0.0012203        | 1.00 | 0.0000000        | 0.00   | 4.51447          | 0.99 | 0.0013819       | 5.43   | 0.0000000       | 0.00 | 0.0228998       | 0.50 | 0.0008126        | 9.68 | 0.0000000        | 0.00   | 1.896153        | 0.49 | 0.0029005        | 1.35 | 9.96505         | 1.22 | 2.18874         | 5.43   | 0.0000000       | 0.00 | 0.0011510       | 9.66 |
| 21F16551           | 24.0 % | ✓ | 0.0271069       | 1.53   | 0.0000000       | 0.00 | 0.0020641        | 0.64 | 0.0000000        | 0.00   | 7.63639          | 0.62 | 0.0051097       | 1.53   | 0.0000000       | 0.00 | 0.0416012       | 0.30 | 0.0013746        | 9.65 | 0.0000000        | 0.00   | 3.444663        | 0.29 | 0.0049064        | 1.11 | 17.27309        | 0.73 | 8.09304         | 1.53   | 0.0000000       | 0.00 | 0.0020909       | 9.65 |
| 21F16553           | 24.0 % | ✓ | 0.0003923       | 94.40  | 0.0000000       | 0.00 | 0.0006517        | 1.83 | 0.0000000        | 0.00   | 2.41116          | 1.82 | 0.0000740       | 94.40  | 0.0000000       | 0.00 | 0.0107248       | 0.95 | 0.0004340        | 9.80 | 0.0000000        | 0.00   | 0.888034        | 0.95 | 0.0015492        | 2.04 | 4.70601         | 2.40 | 0.11713         | 94.40  | 0.0000000       | 0.00 | 0.0005390       | 9.70 |
| 21F16554           | 24.0 % | ✓ | 0.0053532       | 7.23   | 0.0000000       | 0.00 | 0.0019032        | 0.74 | 0.0000012        | 103.29 | 7.04098          | 0.73 | 0.0010091       | 7.23   | 0.0000000       | 0.00 | 0.0332460       | 0.34 | 0.0012674        | 9.66 | 0.0095500        | 103.30 | 2.752838        | 0.32 | 0.0045238        | 1.17 | 14.28780        | 0.83 | 1.59826         | 7.23   | 0.0000000       | 0.00 | 0.0016710       | 9.66 |
| 21F16556           | 24.0 % | ✓ | 0.0002090       | 185.05 | 0.0000000       | 0.00 | 0.0004327        | 2.60 | 0.0000000        | 0.00   | 1.60071          | 2.59 | 0.0000394       | 185.05 | 0.0000000       | 0.00 | 0.0072257       | 1.61 | 0.0002881        | 9.97 | 0.0000000        | 0.00   | 0.598303        | 1.61 | 0.0010285        | 2.75 | 2.96992         | 3.98 | 0.06241         | 185.05 | 0.0000000       | 0.00 | 0.0003632       | 9.78 |
| 21F16557           | 24.0 % | ✓ | 0.0132148       | 3.16   | 0.0000000       | 0.00 | 0.0023289        | 0.63 | 0.0000000        | 0.00   | 8.61607          | 0.61 | 0.0024910       | 3.17   | 0.0000000       | 0.00 | 0.0293610       | 0.38 | 0.0015509        | 9.65 | 0.0000000        | 0.00   | 2.431153        | 0.37 | 0.0055358        | 1.10 | 12.68358        | 1.00 | 3.94541         | 3.17   | 0.0000000       | 0.00 | 0.0014757       | 9.66 |
| 21F16559           | 24.0 % | ✓ | 0.0015826       | 24.24  | 0.0000000       | 0.00 | 0.0015753        | 0.82 | 0.0000000        | 0.00   | 5.82804          | 0.80 | 0.0002983       | 24.24  | 0.0000000       | 0.00 | 0.0198410       | 0.50 | 0.0010490        | 9.66 | 0.0000000        | 0.00   | 1.642875        | 0.50 | 0.0037445        | 1.22 | 8.49486         | 1.37 | 0.47250         | 24.24  | 0.0000000       | 0.00 | 0.0009972       | 9.66 |
| 21F16560           | 24.0 % | ✓ | 0.0145910       | 2.87   | 0.0000000       | 0.00 | 0.0031920        | 0.47 | 0.0000000        | 0.00   | 11.80919         | 0.44 | 0.0027504       | 2.88   | 0.0000000       | 0.00 | 0.0280829       | 0.38 | 0.0021257        | 9.64 | 0.0000000        | 0.00   | 2.325319        | 0.37 | 0.0075874        | 1.02 | 11.88206        | 1.07 | 4.35629         | 2.88   | 0.0000000       | 0.00 | 0.0014115       | 9.66 |
| 21F16562           | 24.0 % | ✓ | 0.0094499       | 4.40   | 0.0000000       | 0.00 | 0.0025368        | 0.58 | 0.0000012        | 106.39 | 9.38500          | 0.56 | 0.0017813       | 4.40   | 0.0000000       | 0.00 | 0.0440028       | 0.29 | 0.0016893        | 9.65 | 0.0088062        | 106.40 | 3.643522        | 0.28 | 0.0060299        | 1.08 | 18.88297        | 0.67 | 2.82136         | 4.40   | 0.0000000       | 0.00 | 0.0022116       | 9.65 |
| 21F16563           | 24.0 % | ✓ | 0.0043145       | 8.92   | 0.0000000       | 0.00 | 0.0018693        | 0.73 | 0.0000000        | 0.00   | 6.91577          | 0.71 | 0.0008133       | 8.92   | 0.0000000       | 0.00 | 0.0283072       | 0.44 | 0.0012448        | 9.66 | 0.0000000        | 0.00   | 2.343894        | 0.43 | 0.0044434        | 1.16 | 12.06418        | 0.97 | 1.28815         | 8.92   | 0.0000000       | 0.00 | 0.0014227       |      |



| Additional Parameters |        |   | 40Ar/39Ar | 1σ       | 37Ar/39Ar | 1σ       | 36Ar/39Ar | 1σ       | Time (days) | 37Ar (decay) | 39Ar (decay) | 40Ar (moles) |
|-----------------------|--------|---|-----------|----------|-----------|----------|-----------|----------|-------------|--------------|--------------|--------------|
| 21F16520              | 24.0 % | ✓ | 41.920024 | 0.042537 | 3.465358  | 0.010333 | 0.123723  | 0.000276 | 80.242      | 4.891023     | 1.00056723   | 1.584E-11    |
| 21F16521              | 24.0 % | ✓ | 8.270259  | 0.017535 | 2.715863  | 0.012865 | 0.011410  | 0.000110 | 80.248      | 4.891626     | 1.00056727   | 1.370E-12    |
| 21F16523              | 24.0 % | ✓ | 13.615381 | 0.034257 | 3.429661  | 0.017589 | 0.028991  | 0.000185 | 80.260      | 4.892767     | 1.00056736   | 1.650E-12    |
| 21F16524              | 24.0 % | ✓ | 43.085082 | 0.475091 | 8.695287  | 0.111781 | 0.129431  | 0.001605 | 80.266      | 4.893371     | 1.00056740   | 1.252E-12    |
| 21F16526              | 24.0 % | ✓ | 10.115740 | 0.021648 | 2.488754  | 0.012568 | 0.017242  | 0.000128 | 80.278      | 4.894512     | 1.00056748   | 1.630E-12    |
| 21F16527              | 24.0 % | ✓ | 6.014512  | 0.014863 | 2.510550  | 0.013103 | 0.003683  | 0.000100 | 80.283      | 4.895049     | 1.00056752   | 9.086E-13    |
| 21F16529              | 24.0 % | ✓ | 6.931184  | 0.023753 | 2.491826  | 0.019542 | 0.007167  | 0.000162 | 80.296      | 4.896258     | 1.00056761   | 6.641E-13    |
| 21F16530              | 24.0 % | ✓ | 8.457842  | 0.030394 | 3.931189  | 0.024154 | 0.012421  | 0.000188 | 80.301      | 4.896796     | 1.00056765   | 8.087E-13    |
| 21F16532              | 24.0 % | ✓ | 5.917512  | 0.045171 | 2.616724  | 0.037902 | 0.002522  | 0.000314 | 80.314      | 4.898005     | 1.00056774   | 2.624E-13    |
| 21F16533              | 24.0 % | ✓ | 5.676067  | 0.031735 | 2.692653  | 0.028084 | 0.002237  | 0.000214 | 80.319      | 4.898542     | 1.00056778   | 3.703E-13    |
| 21F16535              | 24.0 % | ✓ | 7.603912  | 0.037618 | 5.349142  | 0.035761 | 0.009657  | 0.000220 | 80.331      | 4.899685     | 1.00056786   | 5.223E-13    |
| 21F16536              | 24.0 % | ✓ | 7.099259  | 0.034065 | 3.000277  | 0.025029 | 0.007622  | 0.000190 | 80.338      | 4.900289     | 1.00056790   | 5.335E-13    |
| 21F16538              | 24.0 % | ✓ | 14.861302 | 0.100979 | 2.880901  | 0.042570 | 0.031659  | 0.000466 | 80.349      | 4.901432     | 1.00056799   | 6.488E-13    |
| 21F16539              | 24.0 % | ✓ | 17.602961 | 0.028365 | 4.139103  | 0.014840 | 0.042592  | 0.000184 | 80.356      | 4.902037     | 1.00056803   | 3.709E-12    |
| 21F16541              | 24.0 % | ✓ | 7.083316  | 0.007277 | 2.718148  | 0.008849 | 0.007249  | 0.000062 | 80.367      | 4.903181     | 1.00056812   | 2.380E-12    |
| 21F16542              | 24.0 % | ✓ | 8.812354  | 0.044916 | 2.178156  | 0.030139 | 0.012543  | 0.000271 | 80.374      | 4.903786     | 1.00056816   | 5.195E-13    |
| 21F16544              | 24.0 % | ✓ | 8.369244  | 0.026542 | 3.545561  | 0.020718 | 0.011676  | 0.000161 | 80.385      | 4.904930     | 1.00056824   | 8.263E-13    |
| 21F16545              | 24.0 % | ✓ | 8.116229  | 0.018646 | 2.673415  | 0.013375 | 0.010528  | 0.000130 | 80.392      | 4.905535     | 1.00056829   | 1.135E-12    |
| 21F16547              | 24.0 % | ✓ | 5.669524  | 0.043416 | 2.473091  | 0.035574 | 0.002472  | 0.000300 | 80.403      | 4.906679     | 1.00056837   | 2.722E-13    |
| 21F16548              | 24.0 % | ✓ | 10.854292 | 0.040391 | 1.994147  | 0.018582 | 0.020844  | 0.000226 | 80.410      | 4.907285     | 1.00056841   | 9.974E-13    |
| 21F16550              | 24.0 % | ✓ | 6.400525  | 0.033767 | 2.377219  | 0.026222 | 0.004503  | 0.000211 | 80.422      | 4.908429     | 1.00056850   | 4.303E-13    |
| 21F16551              | 24.0 % | ✓ | 7.354025  | 0.022284 | 2.213723  | 0.015146 | 0.008456  | 0.000122 | 80.428      | 4.909035     | 1.00056854   | 8.980E-13    |
| 21F16553              | 24.0 % | ✓ | 5.159068  | 0.055257 | 2.710440  | 0.055615 | 0.000292  | 0.000416 | 80.440      | 4.910180     | 1.00056863   | 1.625E-13    |
| 21F16554              | 24.0 % | ✓ | 5.761932  | 0.020741 | 2.553522  | 0.020271 | 0.002632  | 0.000140 | 80.445      | 4.910719     | 1.00056866   | 5.624E-13    |
| 21F16556              | 24.0 % | ✓ | 4.851858  | 0.088497 | 2.670820  | 0.081508 | 0.000373  | 0.000645 | 80.458      | 4.911932     | 1.00056875   | 1.029E-13    |
| 21F16557              | 24.0 % | ✓ | 6.825028  | 0.027091 | 3.535974  | 0.025124 | 0.006379  | 0.000173 | 80.463      | 4.912471     | 1.00056879   | 5.887E-13    |
| 21F16559              | 24.0 % | ✓ | 5.446529  | 0.030342 | 3.539395  | 0.033373 | 0.001918  | 0.000233 | 80.476      | 4.913684     | 1.00056888   | 3.175E-13    |
| 21F16560              | 24.0 % | ✓ | 6.961173  | 0.027242 | 5.062005  | 0.028952 | 0.007623  | 0.000182 | 80.481      | 4.914223     | 1.00056892   | 5.749E-13    |
| 21F16562              | 24.0 % | ✓ | 5.947727  | 0.017883 | 2.571550  | 0.016059 | 0.003285  | 0.000114 | 80.494      | 4.915436     | 1.00056901   | 7.684E-13    |
| 21F16563              | 24.0 % | ✓ | 5.686472  | 0.026411 | 2.944964  | 0.024486 | 0.002633  | 0.000164 | 80.499      | 4.915976     | 1.00056905   | 4.727E-13    |



| Procedure<br>Blanks |        | 36Ar ± 1σ (SE)<br>[fA] | 37Ar ± 1σ (SE)<br>[fA] | 38Ar ± 1σ (SE)<br>[fA] | 39Ar ± 1σ (SE)<br>[fA] | 40Ar ± 1σ (SE)<br>[fA] |
|---------------------|--------|------------------------|------------------------|------------------------|------------------------|------------------------|
| 21F16520            | 24.0 % | 0.0219855 ± 0.0002336  | 0.0033187 ± 0.0059031  | 0.0093643 ± 0.0061788  | 0.0078443 ± 0.0062584  | 6.0298711 ± 0.0135734  |
| 21F16521            | 24.0 % | 0.0219855 ± 0.0002336  | 0.0033187 ± 0.0059031  | 0.0093643 ± 0.0061788  | 0.0078443 ± 0.0062584  | 6.0298711 ± 0.0135734  |
| 21F16523            | 24.0 % | 0.0229067 ± 0.0002440  | 0.0127457 ± 0.0060241  | 0.0003138 ± 0.0066561  | 0.0140618 ± 0.0058699  | 6.0192530 ± 0.0158156  |
| 21F16524            | 24.0 % | 0.0229067 ± 0.0002440  | 0.0127457 ± 0.0060241  | 0.0003138 ± 0.0066561  | 0.0140618 ± 0.0058699  | 6.0192530 ± 0.0158156  |
| 21F16526            | 24.0 % | 0.0230801 ± 0.0002599  | 0.0069100 ± 0.0058823  | 0.0131448 ± 0.0064389  | 0.0167144 ± 0.0063288  | 6.0887304 ± 0.0165889  |
| 21F16527            | 24.0 % | 0.0230801 ± 0.0002599  | 0.0069100 ± 0.0058823  | 0.0131448 ± 0.0064389  | 0.0167144 ± 0.0063288  | 6.0887304 ± 0.0165889  |
| 21F16529            | 24.0 % | 0.0221333 ± 0.0002470  | 0.0023810 ± 0.0067025  | 0.0119240 ± 0.0064974  | 0.0136304 ± 0.0057565  | 5.7796054 ± 0.0149648  |
| 21F16530            | 24.0 % | 0.0221333 ± 0.0002470  | 0.0023810 ± 0.0067025  | 0.0119240 ± 0.0064974  | 0.0136304 ± 0.0057565  | 5.7796054 ± 0.0149648  |
| 21F16532            | 24.0 % | 0.0233334 ± 0.0002608  | 0.0171704 ± 0.0059394  | 0.0147168 ± 0.0061005  | 0.0021691 ± 0.0056511  | 5.8440543 ± 0.0182567  |
| 21F16533            | 24.0 % | 0.0233334 ± 0.0002608  | 0.0171704 ± 0.0059394  | 0.0147168 ± 0.0061005  | 0.0021691 ± 0.0056511  | 5.8440543 ± 0.0182567  |
| 21F16535            | 24.0 % | 0.0222944 ± 0.0002359  | 0.0076680 ± 0.0059114  | 0.0142546 ± 0.0065033  | 0.0141937 ± 0.0066188  | 5.7030002 ± 0.0175303  |
| 21F16536            | 24.0 % | 0.0222944 ± 0.0002359  | 0.0076680 ± 0.0059114  | 0.0142546 ± 0.0065033  | 0.0141937 ± 0.0066188  | 5.7030002 ± 0.0175303  |
| 21F16538            | 24.0 % | 0.0225071 ± 0.0002605  | 0.0015833 ± 0.0068213  | 0.0075699 ± 0.0064588  | 0.0051854 ± 0.0057317  | 5.5772442 ± 0.0156160  |
| 21F16539            | 24.0 % | 0.0225071 ± 0.0002605  | 0.0015833 ± 0.0068213  | 0.0075699 ± 0.0064588  | 0.0051854 ± 0.0057317  | 5.5772442 ± 0.0156160  |
| 21F16541            | 24.0 % | 0.0218937 ± 0.0002623  | 0.0121322 ± 0.0067530  | 0.0030927 ± 0.0066653  | 0.0005460 ± 0.0054443  | 5.6467874 ± 0.0156996  |
| 21F16542            | 24.0 % | 0.0218937 ± 0.0002623  | 0.0121322 ± 0.0067530  | 0.0030927 ± 0.0066653  | 0.0005460 ± 0.0054443  | 5.6467874 ± 0.0156996  |
| 21F16544            | 24.0 % | 0.0212441 ± 0.0002297  | 0.0218611 ± 0.0058020  | 0.0143581 ± 0.0062403  | 0.0080505 ± 0.0057803  | 5.4900993 ± 0.0160233  |
| 21F16545            | 24.0 % | 0.0212441 ± 0.0002297  | 0.0218611 ± 0.0058020  | 0.0143581 ± 0.0062403  | 0.0080505 ± 0.0057803  | 5.4900993 ± 0.0160233  |
| 21F16547            | 24.0 % | 0.0213743 ± 0.0002771  | 0.0175906 ± 0.0057466  | 0.0094539 ± 0.0070656  | 0.0084116 ± 0.0062746  | 5.5350766 ± 0.0166269  |
| 21F16548            | 24.0 % | 0.0213743 ± 0.0002771  | 0.0175906 ± 0.0057466  | 0.0094539 ± 0.0070656  | 0.0084116 ± 0.0062746  | 5.5350766 ± 0.0166269  |
| 21F16550            | 24.0 % | 0.0210529 ± 0.0002570  | 0.0119879 ± 0.0065126  | 0.0127801 ± 0.0067141  | 0.0131838 ± 0.0069954  | 5.5039092 ± 0.0157443  |
| 21F16551            | 24.0 % | 0.0210529 ± 0.0002570  | 0.0119879 ± 0.0065126  | 0.0127801 ± 0.0067141  | 0.0131838 ± 0.0069954  | 5.5039092 ± 0.0157443  |
| 21F16553            | 24.0 % | 0.0215988 ± 0.0002439  | 0.0030762 ± 0.0065386  | 0.0074880 ± 0.0067618  | 0.0042605 ± 0.0055587  | 5.4207741 ± 0.0160349  |
| 21F16554            | 24.0 % | 0.0215988 ± 0.0002439  | 0.0030762 ± 0.0065386  | 0.0074880 ± 0.0067618  | 0.0042605 ± 0.0055587  | 5.4207741 ± 0.0160349  |
| 21F16556            | 24.0 % | 0.0201610 ± 0.0002472  | 0.0075492 ± 0.0063540  | 0.0090353 ± 0.0067668  | 0.0046219 ± 0.0068501  | 5.2894187 ± 0.0177158  |
| 21F16557            | 24.0 % | 0.0201610 ± 0.0002472  | 0.0075492 ± 0.0063540  | 0.0090353 ± 0.0067668  | 0.0046219 ± 0.0068501  | 5.2894187 ± 0.0177158  |
| 21F16559            | 24.0 % | 0.0215988 ± 0.0002439  | 0.0030762 ± 0.0065386  | 0.0074880 ± 0.0067618  | 0.0042605 ± 0.0055587  | 5.4207741 ± 0.0160349  |
| 21F16560            | 24.0 % | 0.0215988 ± 0.0002439  | 0.0030762 ± 0.0065386  | 0.0074880 ± 0.0067618  | 0.0042605 ± 0.0055587  | 5.4207741 ± 0.0160349  |
| 21F16562            | 24.0 % | 0.0201610 ± 0.0002472  | 0.0075492 ± 0.0063540  | 0.0090353 ± 0.0067668  | 0.0046219 ± 0.0068501  | 5.2894187 ± 0.0177158  |
| 21F16563            | 24.0 % | 0.0201610 ± 0.0002472  | 0.0075492 ± 0.0063540  | 0.0090353 ± 0.0067668  | 0.0046219 ± 0.0068501  | 5.2894187 ± 0.0177158  |

| Intercept Values |        | 36Ar ± 1σ (SE) [fA]   | r2     | Regression (type,n) | 37Ar ± 1σ (SE) [fA]   | r2     | Regression (type,n) | 38Ar ± 1σ (SE) [fA]   | r2     | Regression (type,n) | 39Ar ± 1σ (SE) [fA]    | r2     | Regression (type,n) | 40Ar ± 1σ (SE) [fA]   | r2     | Regression (type,n) |
|------------------|--------|-----------------------|--------|---------------------|-----------------------|--------|---------------------|-----------------------|--------|---------------------|------------------------|--------|---------------------|-----------------------|--------|---------------------|
| 21F16520         | 24.0 % | 1.2641019 ± 0.0016196 | 0.9864 | EXP 149 of 150      | 7.5222949 ± 0.0069869 | 0.9910 | EXP 150 of 150      | 0.3814056 ± 0.0066871 | 0.2244 | EXP 149 of 150      | 10.6567297 ± 0.0078380 | 0.9951 | EXP 150 of 150      | 453.577021 ± 0.033385 | 0.9999 | EXP 149 of 150      |
| 21F16521         | 24.0 % | 0.0721974 ± 0.0004038 | 0.1628 | EXP 150 of 150      | 2.5861074 ± 0.0066804 | 0.9266 | EXP 150 of 150      | 0.0783561 ± 0.0064053 | 0.0031 | EXP 150 of 150      | 4.6758155 ± 0.0069286  | 0.9791 | EXP 150 of 150      | 44.734279 ± 0.018800  | 0.8118 | EXP 149 of 150      |
| 21F16523         | 24.0 % | 0.1162139 ± 0.0004712 | 0.4374 | EXP 149 of 150      | 2.3975433 ± 0.0065216 | 0.9294 | EXP 150 of 150      | 0.0775385 ± 0.0069914 | 0.0192 | EXP 150 of 150      | 3.4279450 ± 0.0058736  | 0.9706 | EXP 150 of 150      | 52.619866 ± 0.018790  | 0.9834 | EXP 150 of 150      |
| 21F16524         | 24.0 % | 0.1228455 ± 0.0004956 | 0.4669 | EXP 147 of 150      | 1.4630899 ± 0.0065702 | 0.8138 | EXP 150 of 150      | 0.0501931 ± 0.0064474 | 0.0190 | EXP 150 of 150      | 0.8330716 ± 0.0068323  | 0.2549 | EXP 150 of 150      | 41.396922 ± 0.019272  | 0.8252 | EXP 150 of 150      |
| 21F16526         | 24.0 % | 0.0968968 ± 0.0004418 | 0.3071 | EXP 149 of 150      | 2.3080809 ± 0.0066153 | 0.9204 | EXP 150 of 150      | 0.0786718 ± 0.0068196 | 0.0040 | EXP 149 of 150      | 4.5579088 ± 0.0067835  | 0.9793 | EXP 150 of 150      | 52.144176 ± 0.017248  | 0.9905 | EXP 150 of 150      |
| 21F16527         | 24.0 % | 0.0378601 ± 0.0003008 | 0.6483 | EXP 150 of 150      | 2.1825468 ± 0.0062833 | 0.9179 | EXP 150 of 150      | 0.0530905 ± 0.0062364 | 0.0077 | EXP 149 of 150      | 4.2733674 ± 0.0071831  | 0.9748 | EXP 150 of 150      | 31.756133 ± 0.018052  | 0.7050 | EXP 149 of 150      |
| 21F16529         | 24.0 % | 0.0403741 ± 0.0003243 | 0.5940 | EXP 149 of 150      | 1.3716032 ± 0.0062603 | 0.8234 | EXP 150 of 150      | 0.0415884 ± 0.0060426 | 0.0009 | EXP 147 of 150      | 2.7133219 ± 0.0063664  | 0.9479 | EXP 149 of 150      | 24.539693 ± 0.017438  | 0.9717 | EXP 150 of 150      |
| 21F16530         | 24.0 % | 0.0536805 ± 0.0003904 | 0.3075 | EXP 150 of 150      | 2.1578003 ± 0.0067431 | 0.9050 | EXP 150 of 150      | 0.0466753 ± 0.0067174 | 0.0031 | EXP 149 of 150      | 2.7077292 ± 0.0072274  | 0.9288 | EXP 150 of 150      | 28.624355 ± 0.017501  | 0.9054 | EXP 150 of 150      |
| 21F16532         | 24.0 % | 0.0263036 ± 0.0002614 | 0.8028 | EXP 150 of 150      | 0.6822930 ± 0.0058050 | 0.5747 | EXP 150 of 150      | 0.0162522 ± 0.0061319 | 0.0000 | EXP 150 of 150      | 1.2514398 ± 0.0064786  | 0.7134 | EXP 146 of 150      | 13.255605 ± 0.016087  | 0.9936 | EXP 150 of 150      |
| 21F16533         | 24.0 % | 0.0272108 ± 0.0002631 | 0.7649 | EXP 150 of 150      | 1.0240858 ± 0.0064905 | 0.6895 | EXP 150 of 150      | 0.0396545 ± 0.0069688 | 0.0132 | EXP 150 of 150      | 1.8402856 ± 0.0074552  | 0.8520 | EXP 148 of 150      | 16.304107 ± 0.015425  | 0.9912 | EXP 150 of 150      |
| 21F16535         | 24.0 % | 0.0399131 ± 0.0003141 | 0.5987 | EXP 150 of 150      | 2.1131533 ± 0.0061681 | 0.9132 | EXP 150 of 150      | 0.0403104 ± 0.0069951 | 0.0001 | EXP 149 of 150      | 1.9494114 ± 0.0061184  | 0.9062 | EXP 148 of 150      | 20.455998 ± 0.016382  | 0.9825 | EXP 149 of 150      |
| 21F16536         | 24.0 % | 0.0375110 ± 0.0002890 | 0.5721 | EXP 147 of 150      | 1.2996634 ± 0.0060607 | 0.8051 | EXP 150 of 150      | 0.0329543 ± 0.0067485 | 0.0091 | EXP 150 of 150      | 2.1316520 ± 0.0068112  | 0.9033 | EXP 150 of 150      | 20.773974 ± 0.017948  | 0.9741 | EXP 150 of 150      |
| 21F16538         | 24.0 % | 0.0592223 ± 0.0004011 | 0.1388 | EXP 149 of 150      | 0.7221133 ± 0.0063533 | 0.5222 | EXP 145 of 150      | 0.0356815 ± 0.0067840 | 0.0097 | EXP 150 of 150      | 1.2352848 ± 0.0058637  | 0.7836 | EXP 150 of 150      | 23.905051 ± 0.017122  | 0.9575 | EXP 150 of 150      |
| 21F16539         | 24.0 % | 0.2609145 ± 0.0008474 | 0.8735 | EXP 150 of 150      | 4.9975121 ± 0.0071449 | 0.9787 | EXP 150 of 150      | 0.1314538 ± 0.0061470 | 0.0482 | EXP 150 of 150      | 5.9423634 ± 0.0072100  | 0.9870 | EXP 149 of 150      | 110.357456 ± 0.018631 | 0.9995 | EXP 147 of 150      |
| 21F16541         | 24.0 % | 0.0865933 ± 0.0004691 | 0.0323 | EXP 150 of 150      | 5.2423877 ± 0.0066250 | 0.9834 | EXP 147 of 150      | 0.1393303 ± 0.0068318 | 0.0000 | EXP 148 of 150      | 9.4677370 ± 0.0063914  | 0.9960 | EXP 150 of 150      | 72.878044 ± 0.018834  | 0.9970 | EXP 150 of 150      |
| 21F16542         | 24.0 % | 0.0415345 ± 0.0003180 | 0.5390 | EXP 150 of 150      | 0.7473705 ± 0.0064561 | 0.5335 | EXP 150 of 150      | 0.0378977 ± 0.0066418 | 0.0038 | EXP 150 of 150      | 1.6615253 ± 0.0059217  | 0.8660 | EXP 149 of 150      | 20.321503 ± 0.016366  | 0.9810 | EXP 149 of 150      |
| 21F16544         | 24.0 % | 0.0518678 ± 0.0003387 | 0.3526 | EXP 148 of 150      | 2.0259074 ± 0.0064249 | 0.9041 | EXP 150 of 150      | 0.0388360 ± 0.0068613 | 0.0045 | EXP 150 of 150      | 2.7899984 ± 0.0059838  | 0.9574 | EXP 147 of 150      | 28.832677 ± 0.016620  | 0.4475 | EXP 149 of 150      |
| 21F16545         | 24.0 % | 0.0603522 ± 0.0004120 | 0.0348 | EXP 150 of 150      | 2.1617967 ± 0.0054946 | 0.9294 | EXP 147 of 150      | 0.0599329 ± 0.0069518 | 0.0014 | EXP 150 of 150      | 3.9482133 ± 0.0060917  | 0.9782 | EXP 147 of 150      | 37.551465 ± 0.018961  | 0.9447 | EXP 150 of 150      |
| 21F16547         | 24.0 % | 0.0245270 ± 0.0002624 | 0.7904 | EXP 150 of 150      | 0.6971574 ± 0.0060303 | 0.5375 | EXP 150 of 150      | 0.0295270 ± 0.0065768 | 0.0002 | EXP 150 of 150      | 1.3613348 ± 0.0072361  | 0.7356 | EXP 150 of 150      | 13.225200 ± 0.014820  | 0.9928 | EXP 150 of 150      |
| 21F16548         | 24.0 % | 0.0722523 ± 0.0004332 | 0.0500 | EXP 150 of 150      | 1.0661036 ± 0.0063963 | 0.7264 | EXP 148 of 150      | 0.0387705 ± 0.0063275 | 0.0002 | EXP 150 of 150      | 2.5975261 ± 0.0069268  | 0.9337 | EXP 150 of 150      | 33.710237 ± 0.016239  | 0.8864 | EXP 150 of 150      |
| 21F16550         | 24.0 % | 0.0290942 ± 0.0002713 | 0.7438 | EXP 149 of 150      | 0.9262210 ± 0.0058167 | 0.7248 | EXP 150 of 150      | 0.0299122 ± 0.0063059 | 0.0051 | EXP 150 of 150      | 1.9073739 ± 0.0060670  | 0.9057 | EXP 150 of 150      | 17.658850 ± 0.017700  | 0.9794 | EXP 150 of 150      |
| 21F16551         | 24.0 % | 0.0484842 ± 0.0002886 | 0.3732 | EXP 147 of 150      | 1.5582568 ± 0.0058506 | 0.8702 | EXP 150 of 150      | 0.0478921 ± 0.0071543 | 0.0000 | EXP 150 of 150      | 3.4539183 ± 0.0069453  | 0.9640 | EXP 148 of 150      | 30.872126 ± 0.017071  | 0.3362 | EXP 150 of 150      |
| 21F16553         | 24.0 % | 0.0218428 ± 0.0002483 | 0.8309 | EXP 148 of 150      | 0.4911909 ± 0.0058830 | 0.3782 | EXP 149 of 150      | 0.0121982 ± 0.0064491 | 0.0028 | EXP 150 of 150      | 0.8915652 ± 0.0063070  | 0.5845 | EXP 148 of 150      | 10.010194 ± 0.016292  | 0.9941 | EXP 147 of 150      |
| 21F16554         | 24.0 % | 0.0284236 ± 0.0002693 | 0.7279 | EXP 150 of 150      | 1.4282942 ± 0.0071421 | 0.7827 | EXP 150 of 150      | 0.0523804 ± 0.0071240 | 0.0032 | EXP 149 of 150      | 2.7545602 ± 0.0068627  | 0.9409 | EXP 150 of 150      | 21.308506 ± 0.019404  | 0.9573 | EXP 150 of 150      |
| 21F16556         | 24.0 % | 0.0203713 ± 0.0002667 | 0.8094 | EXP 150 of 150      | 0.3314802 ± 0.0054375 | 0.2485 | EXP 150 of 150      | 0.0156593 ± 0.0064247 | 0.0024 | EXP 150 of 150      | 0.6024183 ± 0.0067361  | 0.2544 | EXP 150 of 150      | 8.197290 ± 0.017725   | 0.9936 | EXP 150 of 150      |
| 21F16557         | 24.0 % | 0.0347777 ± 0.0003047 | 0.6166 | EXP 150 of 150      | 1.7509703 ± 0.0072031 | 0.8413 | EXP 150 of 150      | 0.0336970 ± 0.0072417 | 0.0008 | EXP 150 of 150      | 2.4350701 ± 0.0057703  | 0.9476 | EXP 149 of 150      | 21.919891 ± 0.015822  | 0.9541 | EXP 150 of 150      |
| 21F16559         | 24.0 % | 0.0245684 ± 0.0002654 | 0.7782 | EXP 150 of 150      | 1.1820610 ± 0.0061512 | 0.7701 | EXP 149 of 150      | 0.0212984 ± 0.0063495 | 0.0002 | EXP 149 of 150      | 1.6466628 ± 0.0059036  | 0.8805 | EXP 150 of 150      | 14.389137 ± 0.016358  | 0.9890 | EXP 150 of 150      |
| 21F16560         | 24.0 % | 0.0383213 ± 0.0003085 | 0.4931 | EXP 148 of 150      | 2.3917572 ± 0.0056213 | 0.9440 | EXP 150 of 150      | 0.0327137 ± 0.0069944 | 0.0005 | EXP 150 of 150      | 2.3311916 ± 0.0063382  | 0.9303 | EXP 150 of 150      | 21.660541 ± 0.016855  | 0.9491 | EXP 150 of 150      |
| 21F16562         | 24.0 % | 0.0314338 ± 0.0003019 | 0.6623 | EXP 150 of 150      | 1.9054148 ± 0.0070071 | 0.8745 | EXP 150 of 150      | 0.0650900 ± 0.0064201 | 0.0330 | EXP 149 of 150      | 3.6448252 ± 0.0073360  | 0.9649 | EXP 150 of 150      | 26.995955 ± 0.017301  | 0.5427 | EXP 150 of 150      |
| 21F16563         | 24.0 % | 0.0259761 ± 0.0002637 | 0.7773 | EXP 149 of 150      | 1.4059244 ± 0.0068044 | 0.7780 | EXP 150 of 150      | 0.0213563 ± 0.0062872 | 0.0102 | EXP 150 of 150      | 2.3469438 ± 0.0072951  | 0.9159 | EXP 150 of 150      | 18.643174 ± 0.015933  | 0.9758 | EXP 150 of 150      |

| Project Info |        | Analyst     | Irradiation | X-pos | Y-pos | Z/H-pos | Project                | Experiment | Nmb |
|--------------|--------|-------------|-------------|-------|-------|---------|------------------------|------------|-----|
| 21F16520     | 24.0 % | Dan Miggins | 21-OSU-04   | 0.00  | 0.00  | 4.14    | Oregon\Swenton (20-01) | 21F16516   | 01  |
| 21F16521     | 24.0 % | Dan Miggins | 21-OSU-04   | 0.00  | 0.00  | 4.14    | Oregon\Swenton (20-01) | 21F16516   | 01  |
| 21F16523     | 24.0 % | Dan Miggins | 21-OSU-04   | 0.00  | 0.00  | 4.14    | Oregon\Swenton (20-01) | 21F16516   | 01  |
| 21F16524     | 24.0 % | Dan Miggins | 21-OSU-04   | 0.00  | 0.00  | 4.14    | Oregon\Swenton (20-01) | 21F16516   | 01  |
| 21F16526     | 24.0 % | Dan Miggins | 21-OSU-04   | 0.00  | 0.00  | 4.14    | Oregon\Swenton (20-01) | 21F16516   | 01  |
| 21F16527     | 24.0 % | Dan Miggins | 21-OSU-04   | 0.00  | 0.00  | 4.14    | Oregon\Swenton (20-01) | 21F16516   | 01  |
| 21F16529     | 24.0 % | Dan Miggins | 21-OSU-04   | 0.00  | 0.00  | 4.14    | Oregon\Swenton (20-01) | 21F16516   | 01  |
| 21F16530     | 24.0 % | Dan Miggins | 21-OSU-04   | 0.00  | 0.00  | 4.14    | Oregon\Swenton (20-01) | 21F16516   | 01  |
| 21F16532     | 24.0 % | Dan Miggins | 21-OSU-04   | 0.00  | 0.00  | 4.14    | Oregon\Swenton (20-01) | 21F16516   | 01  |
| 21F16533     | 24.0 % | Dan Miggins | 21-OSU-04   | 0.00  | 0.00  | 4.14    | Oregon\Swenton (20-01) | 21F16516   | 01  |
| 21F16535     | 24.0 % | Dan Miggins | 21-OSU-04   | 0.00  | 0.00  | 4.14    | Oregon\Swenton (20-01) | 21F16516   | 01  |
| 21F16536     | 24.0 % | Dan Miggins | 21-OSU-04   | 0.00  | 0.00  | 4.14    | Oregon\Swenton (20-01) | 21F16516   | 01  |
| 21F16538     | 24.0 % | Dan Miggins | 21-OSU-04   | 0.00  | 0.00  | 4.14    | Oregon\Swenton (20-01) | 21F16516   | 01  |
| 21F16539     | 24.0 % | Dan Miggins | 21-OSU-04   | 0.00  | 0.00  | 4.14    | Oregon\Swenton (20-01) | 21F16516   | 01  |
| 21F16541     | 24.0 % | Dan Miggins | 21-OSU-04   | 0.00  | 0.00  | 4.14    | Oregon\Swenton (20-01) | 21F16516   | 01  |
| 21F16542     | 24.0 % | Dan Miggins | 21-OSU-04   | 0.00  | 0.00  | 4.14    | Oregon\Swenton (20-01) | 21F16516   | 01  |
| 21F16544     | 24.0 % | Dan Miggins | 21-OSU-04   | 0.00  | 0.00  | 4.14    | Oregon\Swenton (20-01) | 21F16516   | 01  |
| 21F16545     | 24.0 % | Dan Miggins | 21-OSU-04   | 0.00  | 0.00  | 4.14    | Oregon\Swenton (20-01) | 21F16516   | 01  |
| 21F16547     | 24.0 % | Dan Miggins | 21-OSU-04   | 0.00  | 0.00  | 4.14    | Oregon\Swenton (20-01) | 21F16516   | 01  |
| 21F16548     | 24.0 % | Dan Miggins | 21-OSU-04   | 0.00  | 0.00  | 4.14    | Oregon\Swenton (20-01) | 21F16516   | 01  |
| 21F16550     | 24.0 % | Dan Miggins | 21-OSU-04   | 0.00  | 0.00  | 4.14    | Oregon\Swenton (20-01) | 21F16516   | 01  |
| 21F16551     | 24.0 % | Dan Miggins | 21-OSU-04   | 0.00  | 0.00  | 4.14    | Oregon\Swenton (20-01) | 21F16516   | 01  |
| 21F16553     | 24.0 % | Dan Miggins | 21-OSU-04   | 0.00  | 0.00  | 4.14    | Oregon\Swenton (20-01) | 21F16516   | 01  |
| 21F16554     | 24.0 % | Dan Miggins | 21-OSU-04   | 0.00  | 0.00  | 4.14    | Oregon\Swenton (20-01) | 21F16516   | 01  |
| 21F16556     | 24.0 % | Dan Miggins | 21-OSU-04   | 0.00  | 0.00  | 4.14    | Oregon\Swenton (20-01) | 21F16516   | 01  |
| 21F16557     | 24.0 % | Dan Miggins | 21-OSU-04   | 0.00  | 0.00  | 4.14    | Oregon\Swenton (20-01) | 21F16516   | 01  |
| 21F16559     | 24.0 % | Dan Miggins | 21-OSU-04   | 0.00  | 0.00  | 4.14    | Oregon\Swenton (20-01) | 21F16516   | 01  |
| 21F16560     | 24.0 % | Dan Miggins | 21-OSU-04   | 0.00  | 0.00  | 4.14    | Oregon\Swenton (20-01) | 21F16516   | 01  |
| 21F16562     | 24.0 % | Dan Miggins | 21-OSU-04   | 0.00  | 0.00  | 4.14    | Oregon\Swenton (20-01) | 21F16516   | 01  |
| 21F16563     | 24.0 % | Dan Miggins | 21-OSU-04   | 0.00  | 0.00  | 4.14    | Oregon\Swenton (20-01) | 21F16516   | 01  |

| Sample Parameters |        | Sample   | Material    | Location    | Standard Name   | Standard (in Ma) | %1σ   | Standard Reference  | Standard 40Ar/39Ar | %1σ   | J          | %1σ   | Air 40Ar/36Ar | %1σ   | MDF (lin)  | %1σ   | Volume Ratio | Sensitivity (mol/volt) | Day | Month | Year | Hour | Min | Resist |
|-------------------|--------|----------|-------------|-------------|-----------------|------------------|-------|---------------------|--------------------|-------|------------|-------|---------------|-------|------------|-------|--------------|------------------------|-----|-------|------|------|-----|--------|
| 21F16520          | 24.0 % | VS19-068 | Plagioclase | Birch Creek | FCT-NM (4X5-21) | 28.201           | 0.082 | Kuiper et al (2008) | 9.38445            | 0.113 | 0.00165439 | 0.113 | 300.962       | 0.106 | 0.99800215 | 0.037 | 1            | 3.54E-14               | 4   | SEP   | 2021 | 21   | 19  | 1      |
| 21F16521          | 24.0 % | VS19-068 | Plagioclase | Birch Creek | FCT-NM (4X5-21) | 28.201           | 0.082 | Kuiper et al (2008) | 9.38445            | 0.113 | 0.00165439 | 0.113 | 300.962       | 0.106 | 0.99800215 | 0.037 | 1            | 3.54E-14               | 4   | SEP   | 2021 | 21   | 28  | 1      |
| 21F16523          | 24.0 % | VS19-068 | Plagioclase | Birch Creek | FCT-NM (4X5-21) | 28.201           | 0.082 | Kuiper et al (2008) | 9.38445            | 0.113 | 0.00165439 | 0.113 | 300.962       | 0.106 | 0.99800215 | 0.037 | 1            | 3.54E-14               | 4   | SEP   | 2021 | 21   | 45  | 1      |
| 21F16524          | 24.0 % | VS19-068 | Plagioclase | Birch Creek | FCT-NM (4X5-21) | 28.201           | 0.082 | Kuiper et al (2008) | 9.38445            | 0.113 | 0.00165439 | 0.113 | 300.962       | 0.106 | 0.99800215 | 0.037 | 1            | 3.54E-14               | 4   | SEP   | 2021 | 21   | 54  | 1      |
| 21F16526          | 24.0 % | VS19-068 | Plagioclase | Birch Creek | FCT-NM (4X5-21) | 28.201           | 0.082 | Kuiper et al (2008) | 9.38445            | 0.113 | 0.00165439 | 0.113 | 300.962       | 0.106 | 0.99800215 | 0.037 | 1            | 3.54E-14               | 4   | SEP   | 2021 | 22   | 11  | 1      |
| 21F16527          | 24.0 % | VS19-068 | Plagioclase | Birch Creek | FCT-NM (4X5-21) | 28.201           | 0.082 | Kuiper et al (2008) | 9.38445            | 0.113 | 0.00165439 | 0.113 | 300.962       | 0.106 | 0.99800215 | 0.037 | 1            | 3.54E-14               | 4   | SEP   | 2021 | 22   | 19  | 1      |
| 21F16529          | 24.0 % | VS19-068 | Plagioclase | Birch Creek | FCT-NM (4X5-21) | 28.201           | 0.082 | Kuiper et al (2008) | 9.38445            | 0.113 | 0.00165439 | 0.113 | 300.962       | 0.106 | 0.99800215 | 0.037 | 1            | 3.54E-14               | 4   | SEP   | 2021 | 22   | 37  | 1      |
| 21F16530          | 24.0 % | VS19-068 | Plagioclase | Birch Creek | FCT-NM (4X5-21) | 28.201           | 0.082 | Kuiper et al (2008) | 9.38445            | 0.113 | 0.00165439 | 0.113 | 300.962       | 0.106 | 0.99800215 | 0.037 | 1            | 3.54E-14               | 4   | SEP   | 2021 | 22   | 45  | 1      |
| 21F16532          | 24.0 % | VS19-068 | Plagioclase | Birch Creek | FCT-NM (4X5-21) | 28.201           | 0.082 | Kuiper et al (2008) | 9.38445            | 0.113 | 0.00165439 | 0.113 | 300.962       | 0.106 | 0.99800215 | 0.037 | 1            | 3.54E-14               | 4   | SEP   | 2021 | 23   | 3   | 1      |
| 21F16533          | 24.0 % | VS19-068 | Plagioclase | Birch Creek | FCT-NM (4X5-21) | 28.201           | 0.082 | Kuiper et al (2008) | 9.38445            | 0.113 | 0.00165439 | 0.113 | 300.962       | 0.106 | 0.99800215 | 0.037 | 1            | 3.54E-14               | 4   | SEP   | 2021 | 23   | 11  | 1      |
| 21F16535          | 24.0 % | VS19-068 | Plagioclase | Birch Creek | FCT-NM (4X5-21) | 28.201           | 0.082 | Kuiper et al (2008) | 9.38445            | 0.113 | 0.00165439 | 0.113 | 300.962       | 0.106 | 0.99800215 | 0.037 | 1            | 3.54E-14               | 4   | SEP   | 2021 | 23   | 28  | 1      |
| 21F16536          | 24.0 % | VS19-068 | Plagioclase | Birch Creek | FCT-NM (4X5-21) | 28.201           | 0.082 | Kuiper et al (2008) | 9.38445            | 0.113 | 0.00165439 | 0.113 | 300.962       | 0.106 | 0.99800215 | 0.037 | 1            | 3.54E-14               | 4   | SEP   | 2021 | 23   | 37  | 1      |
| 21F16538          | 24.0 % | VS19-068 | Plagioclase | Birch Creek | FCT-NM (4X5-21) | 28.201           | 0.082 | Kuiper et al (2008) | 9.38445            | 0.113 | 0.00165439 | 0.113 | 300.962       | 0.106 | 0.99800215 | 0.037 | 1            | 3.54E-14               | 4   | SEP   | 2021 | 23   | 54  | 1      |
| 21F16539          | 24.0 % | VS19-068 | Plagioclase | Birch Creek | FCT-NM (4X5-21) | 28.201           | 0.082 | Kuiper et al (2008) | 9.38445            | 0.113 | 0.00165439 | 0.113 | 300.962       | 0.106 | 0.99800215 | 0.037 | 1            | 3.54E-14               | 5   | SEP   | 2021 | 0    | 3   | 1      |
| 21F16541          | 24.0 % | VS19-068 | Plagioclase | Birch Creek | FCT-NM (4X5-21) | 28.201           | 0.082 | Kuiper et al (2008) | 9.38445            | 0.113 | 0.00165439 | 0.113 | 300.962       | 0.106 | 0.99800215 | 0.037 | 1            | 3.54E-14               | 5   | SEP   | 2021 | 0    | 20  | 1      |
| 21F16542          | 24.0 % | VS19-068 | Plagioclase | Birch Creek | FCT-NM (4X5-21) | 28.201           | 0.082 | Kuiper et al (2008) | 9.38445            | 0.113 | 0.00165439 | 0.113 | 300.962       | 0.106 | 0.99800215 | 0.037 | 1            | 3.54E-14               | 5   | SEP   | 2021 | 0    | 29  | 1      |
| 21F16544          | 24.0 % | VS19-068 | Plagioclase | Birch Creek | FCT-NM (4X5-21) | 28.201           | 0.082 | Kuiper et al (2008) | 9.38445            | 0.113 | 0.00165439 | 0.113 | 300.962       | 0.106 | 0.99800215 | 0.037 | 1            | 3.54E-14               | 5   | SEP   | 2021 | 0    | 46  | 1      |
| 21F16545          | 24.0 % | VS19-068 | Plagioclase | Birch Creek | FCT-NM (4X5-21) | 28.201           | 0.082 | Kuiper et al (2008) | 9.38445            | 0.113 | 0.00165439 | 0.113 | 300.962       | 0.106 | 0.99800215 | 0.037 | 1            | 3.54E-14               | 5   | SEP   | 2021 | 0    | 55  | 1      |
| 21F16547          | 24.0 % | VS19-068 | Plagioclase | Birch Creek | FCT-NM (4X5-21) | 28.201           | 0.082 | Kuiper et al (2008) | 9.38445            | 0.113 | 0.00165439 | 0.113 | 300.962       | 0.106 | 0.99800215 | 0.037 | 1            | 3.54E-14               | 5   | SEP   | 2021 | 1    | 12  | 1      |
| 21F16548          | 24.0 % | VS19-068 | Plagioclase | Birch Creek | FCT-NM (4X5-21) | 28.201           | 0.082 | Kuiper et al (2008) | 9.38445            | 0.113 | 0.00165439 | 0.113 | 300.962       | 0.106 | 0.99800215 | 0.037 | 1            | 3.54E-14               | 5   | SEP   | 2021 | 1    | 21  | 1      |
| 21F16550          | 24.0 % | VS19-068 | Plagioclase | Birch Creek | FCT-NM (4X5-21) | 28.201           | 0.082 | Kuiper et al (2008) | 9.38445            | 0.113 | 0.00165439 | 0.113 | 300.962       | 0.106 | 0.99800215 | 0.037 | 1            | 3.54E-14               | 5   | SEP   | 2021 | 1    | 38  | 1      |
| 21F16551          | 24.0 % | VS19-068 | Plagioclase | Birch Creek | FCT-NM (4X5-21) | 28.201           | 0.082 | Kuiper et al (2008) | 9.38445            | 0.113 | 0.00165439 | 0.113 | 300.962       | 0.106 | 0.99800215 | 0.037 | 1            | 3.54E-14               | 5   | SEP   | 2021 | 1    | 47  | 1      |
| 21F16553          | 24.0 % | VS19-068 | Plagioclase | Birch Creek | FCT-NM (4X5-21) | 28.201           | 0.082 | Kuiper et al (2008) | 9.38445            | 0.113 | 0.00165439 | 0.113 | 300.962       | 0.106 | 0.99800215 | 0.037 | 1            | 3.54E-14               | 5   | SEP   | 2021 | 2    | 4   | 1      |
| 21F16554          | 24.0 % | VS19-068 | Plagioclase | Birch Creek | FCT-NM (4X5-21) | 28.201           | 0.082 | Kuiper et al (2008) | 9.38445            | 0.113 | 0.00165439 | 0.113 | 300.962       | 0.106 | 0.99800215 | 0.037 | 1            | 3.54E-14               | 5   | SEP   | 2021 | 2    | 12  | 1      |
| 21F16556          | 24.0 % | VS19-068 | Plagioclase | Birch Creek | FCT-NM (4X5-21) | 28.201           | 0.082 | Kuiper et al (2008) | 9.38445            | 0.113 | 0.00165439 | 0.113 | 300.962       | 0.106 | 0.99800215 | 0.037 | 1            | 3.54E-14               | 5   | SEP   | 2021 | 2    | 30  | 1      |
| 21F16557          | 24.0 % | VS19-068 | Plagioclase | Birch Creek | FCT-NM (4X5-21) | 28.201           | 0.082 | Kuiper et al (2008) | 9.38445            | 0.113 | 0.00165439 | 0.113 | 300.962       | 0.106 | 0.99800215 | 0.037 | 1            | 3.54E-14               | 5   | SEP   | 2021 | 2    | 38  | 1      |
| 21F16559          | 24.0 % | VS19-068 | Plagioclase | Birch Creek | FCT-NM (4X5-21) | 28.201           | 0.082 | Kuiper et al (2008) | 9.38445            | 0.113 | 0.00165439 | 0.113 | 300.962       | 0.106 | 0.99800215 | 0.037 | 1            | 3.54E-14               | 5   | SEP   | 2021 | 2    | 56  | 1      |
| 21F16560          | 24.0 % | VS19-068 | Plagioclase | Birch Creek | FCT-NM (4X5-21) | 28.201           | 0.082 | Kuiper et al (2008) | 9.38445            | 0.113 | 0.00165439 | 0.113 | 300.962       | 0.106 | 0.99800215 | 0.037 | 1            | 3.54E-14               | 5   | SEP   | 2021 | 3    | 4   | 1      |
| 21F16562          | 24.0 % | VS19-068 | Plagioclase | Birch Creek | FCT-NM (4X5-21) | 28.201           | 0.082 | Kuiper et al (2008) | 9.38445            | 0.113 | 0.00165439 | 0.113 | 300.962       | 0.106 | 0.99800215 | 0.037 | 1            | 3.54E-14               | 5   | SEP   | 2021 | 3    | 22  | 1      |
| 21F16563          | 24.0 % | VS19-068 | Plagioclase | Birch Creek | FCT-NM (4X5-21) | 28.201           | 0.082 | Kuiper et al (2008) | 9.38445            | 0.113 | 0.00165439 | 0.113 | 300.962       | 0.106 | 0.99800215 | 0.037 | 1            | 3.54E-14               | 5   | SEP   | 2021 | 3    | 30  | 1      |



21F16516.AGE >>> VS19-068 >>> OREGON | SWENTON (20-01) PROJECT

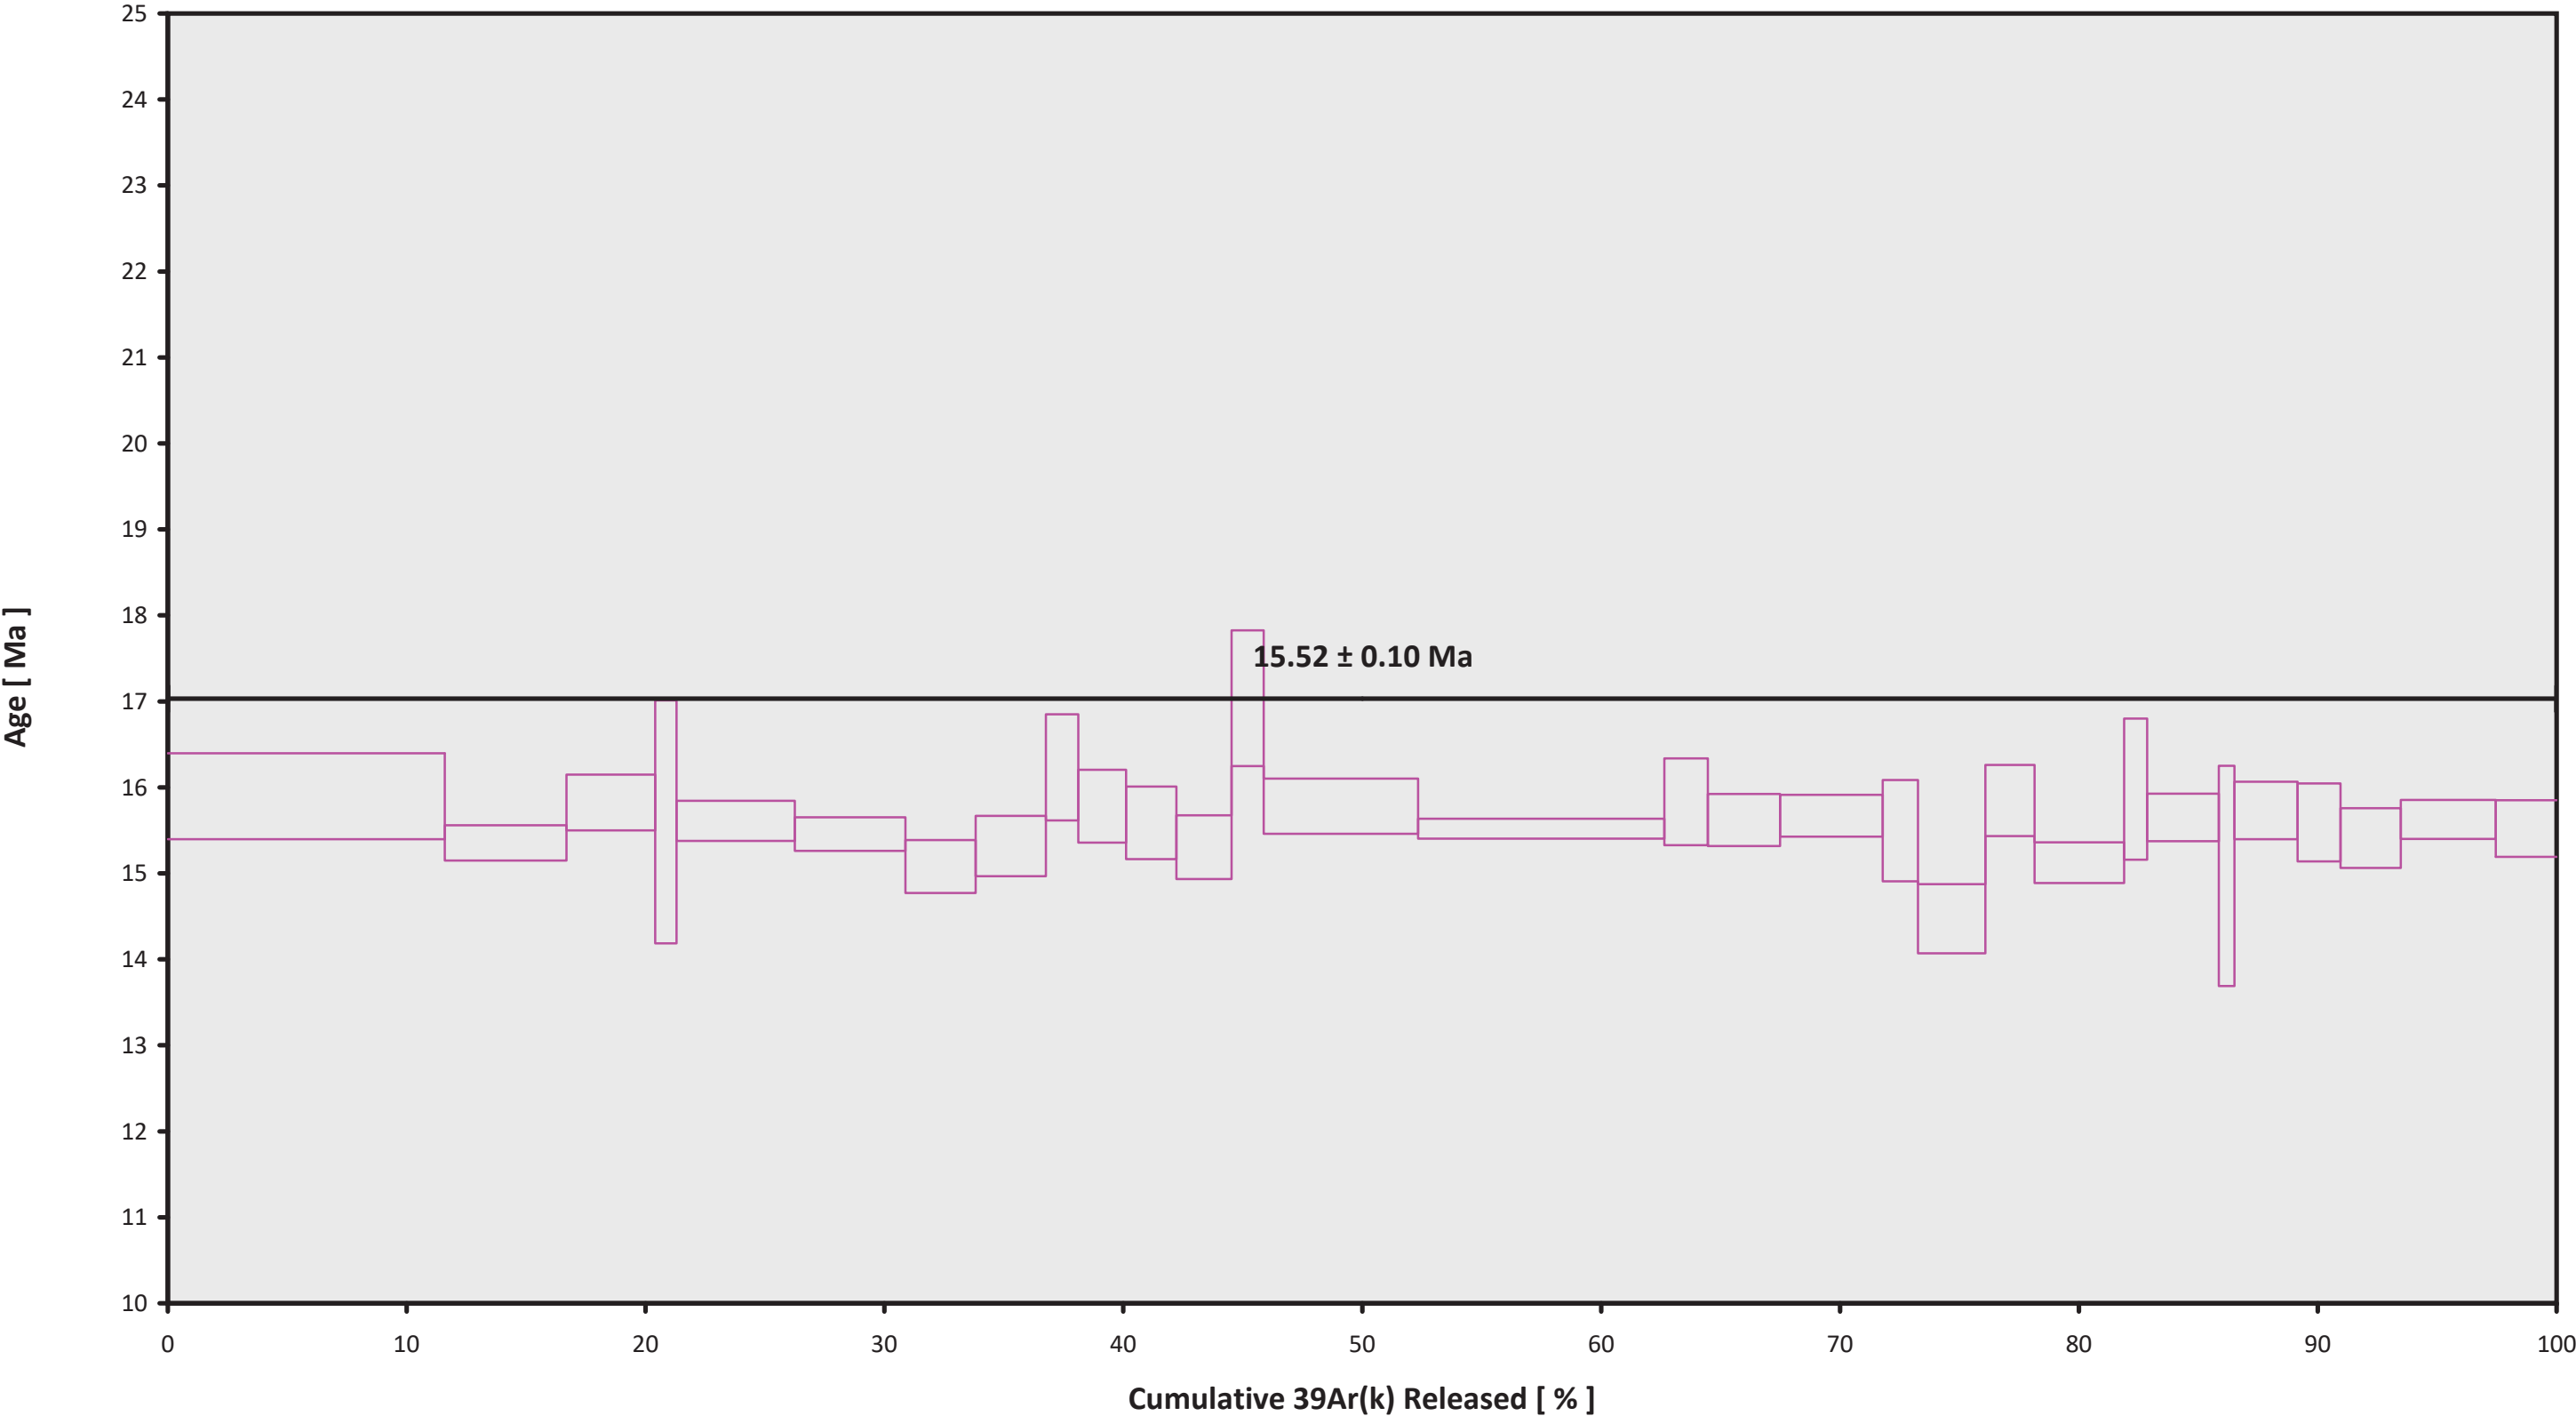

Ar-Ages in Ma

WEIGHTED PLATEAU

15.52 ± 0.10

TOTAL FUSION

15.59 ± 0.09

NORMAL ISOCHRON

15.43 ± 0.13

INVERSE ISOCHRON

15.48 ± 0.12

MSWD (PROBABILITY)

3.28 (0%)

ASSUMED TRAPPED 40AR/36AR RATIO

Standard 40/36 = 298.56 ± 0.104 %SD

Sample Info

Plagioclase

Birch Creek

Dan Miggins

IRR = 21-OSU-04 (4X5-21)

J = 0.00165439 ± 0.00000187

21F16516.AGE >>> VS19-068 >>> OREGON | SWENTON (20-01) PROJECT

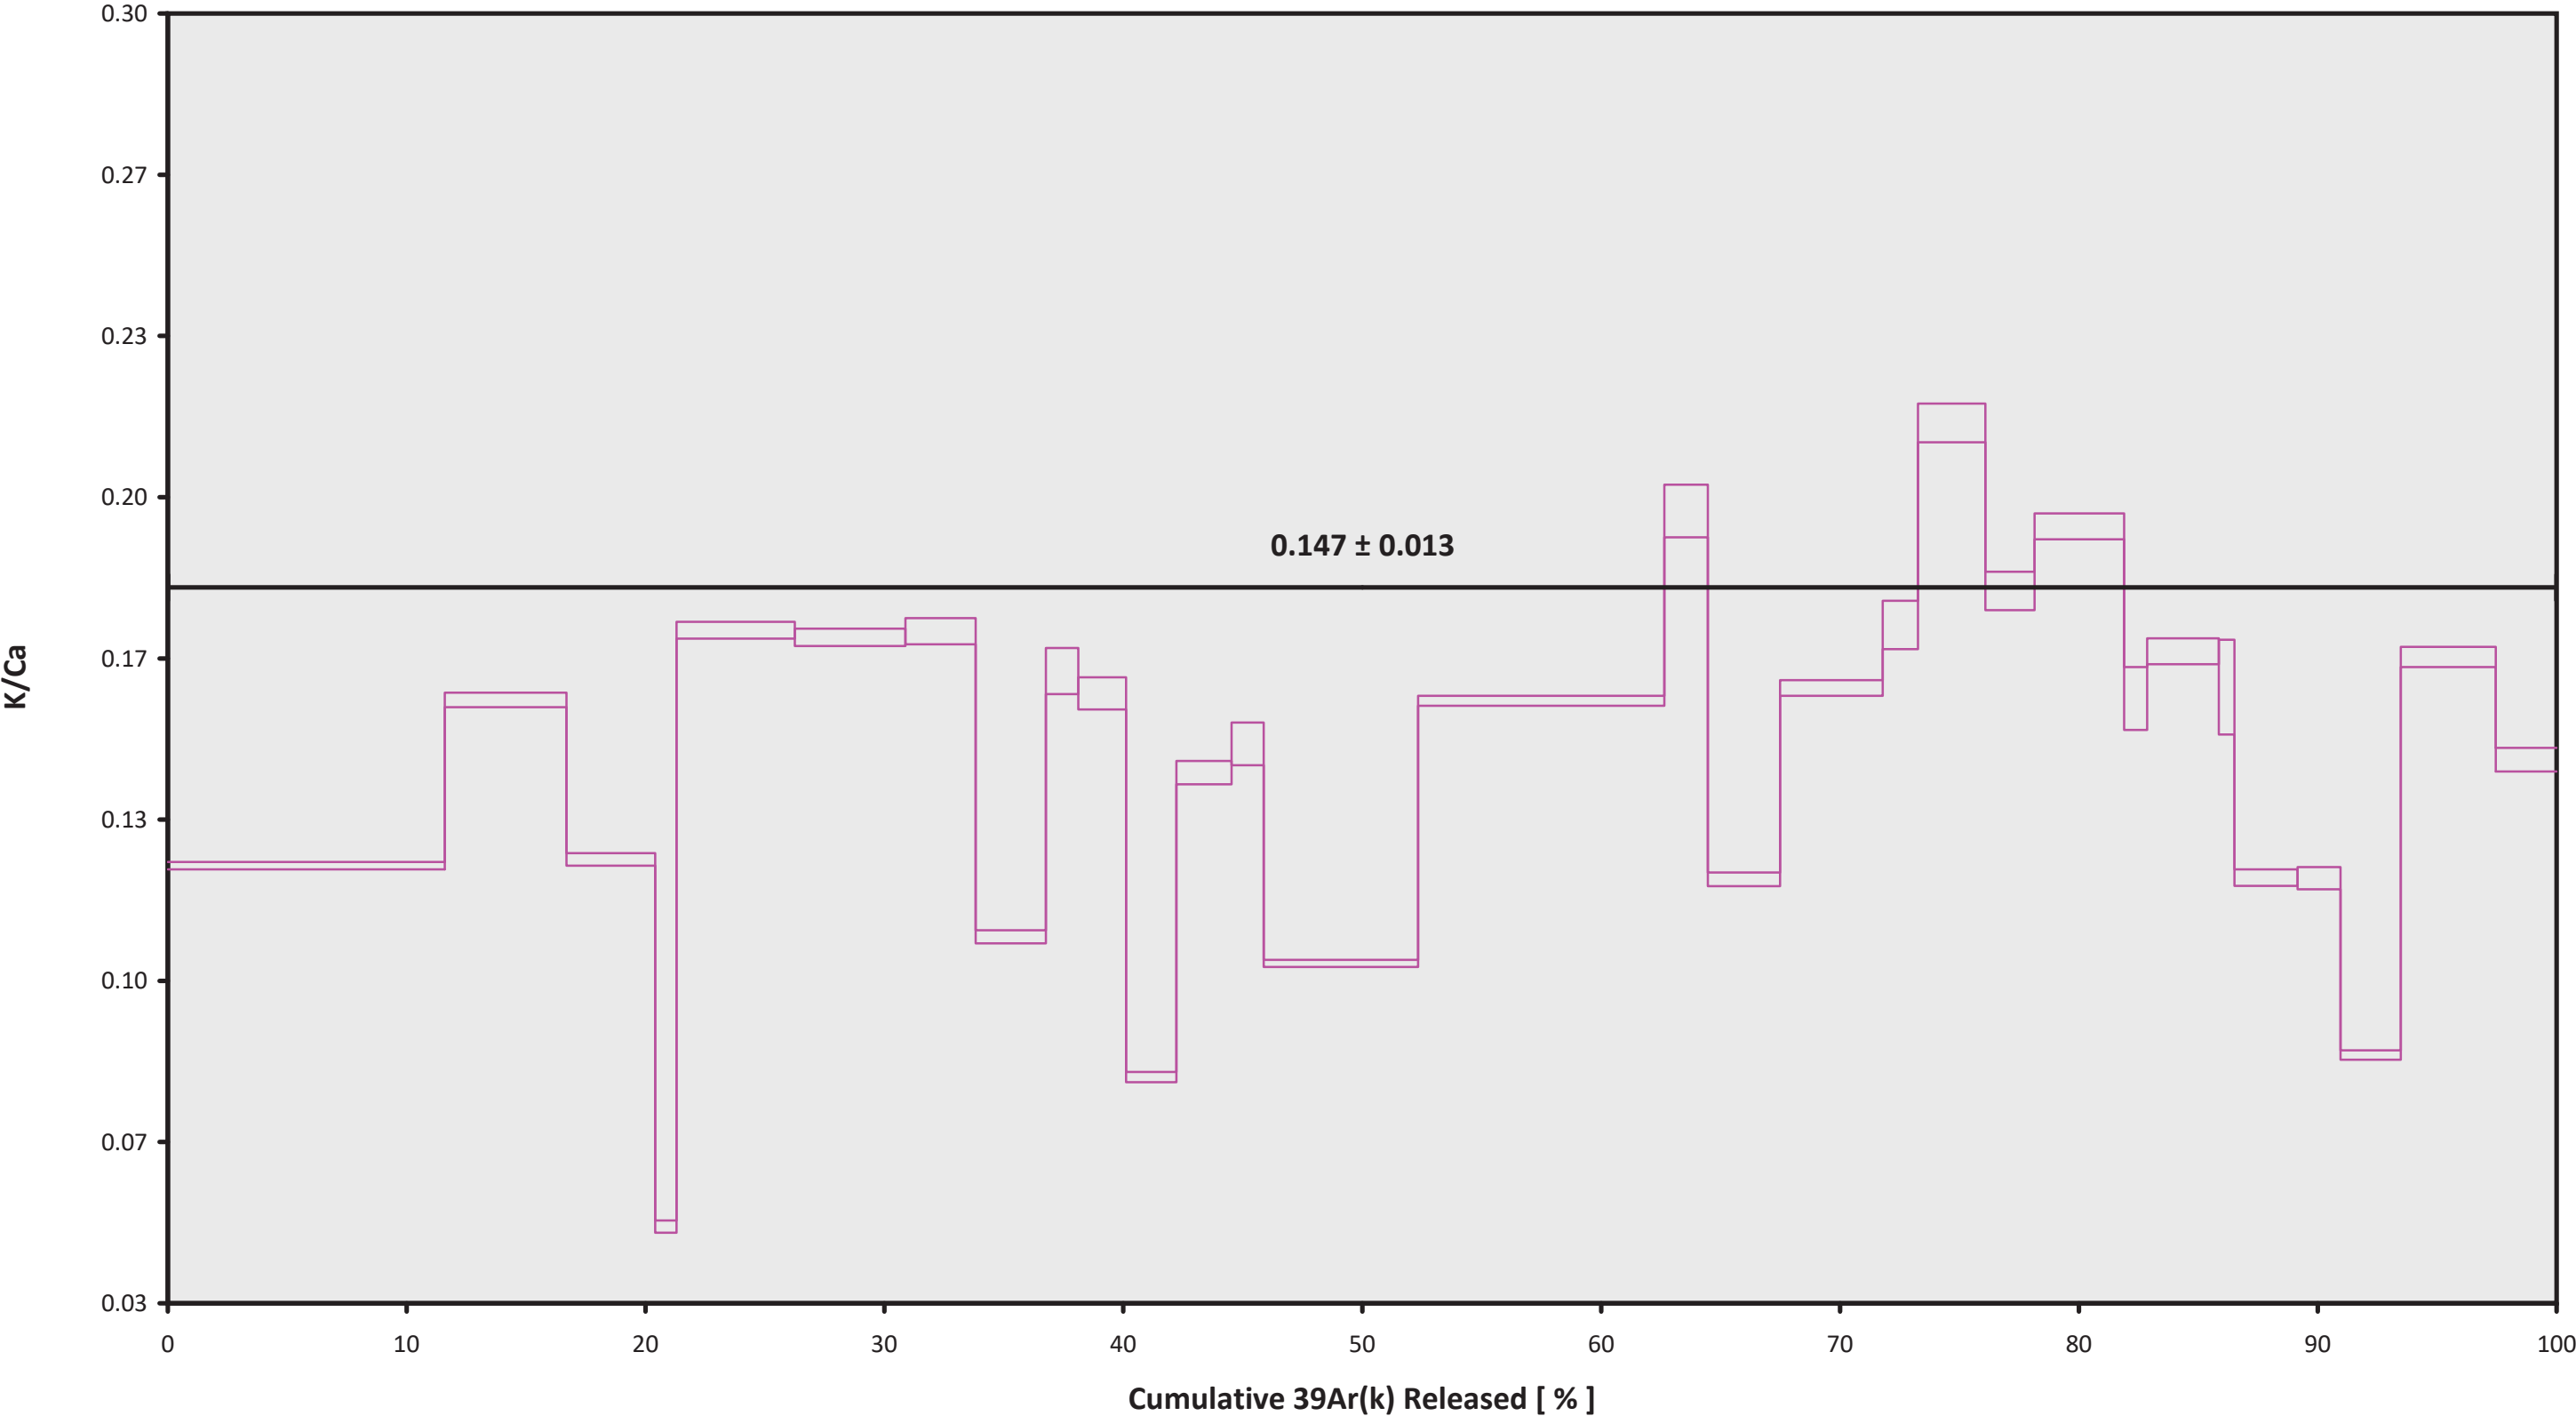

Ar-Ages in Ma

WEIGHTED PLATEAU

15.52 ± 0.10

TOTAL FUSION

15.59 ± 0.09

NORMAL ISOCHRON

15.43 ± 0.13

INVERSE ISOCHRON

15.48 ± 0.12

ASSUMED TRAPPED 40AR/36AR RATIO

Standard 40/36 = 298.56 ± 0.104 %SD

Sample Info

Plagioclase

Birch Creek

Dan Miggins

IRR = 21-OSU-04 (4X5-21)

J = 0.00165439 ± 0.00000187

21F16516.AGE >>> VS19-068 >>> OREGON | SWENTON (20-01) PROJECT

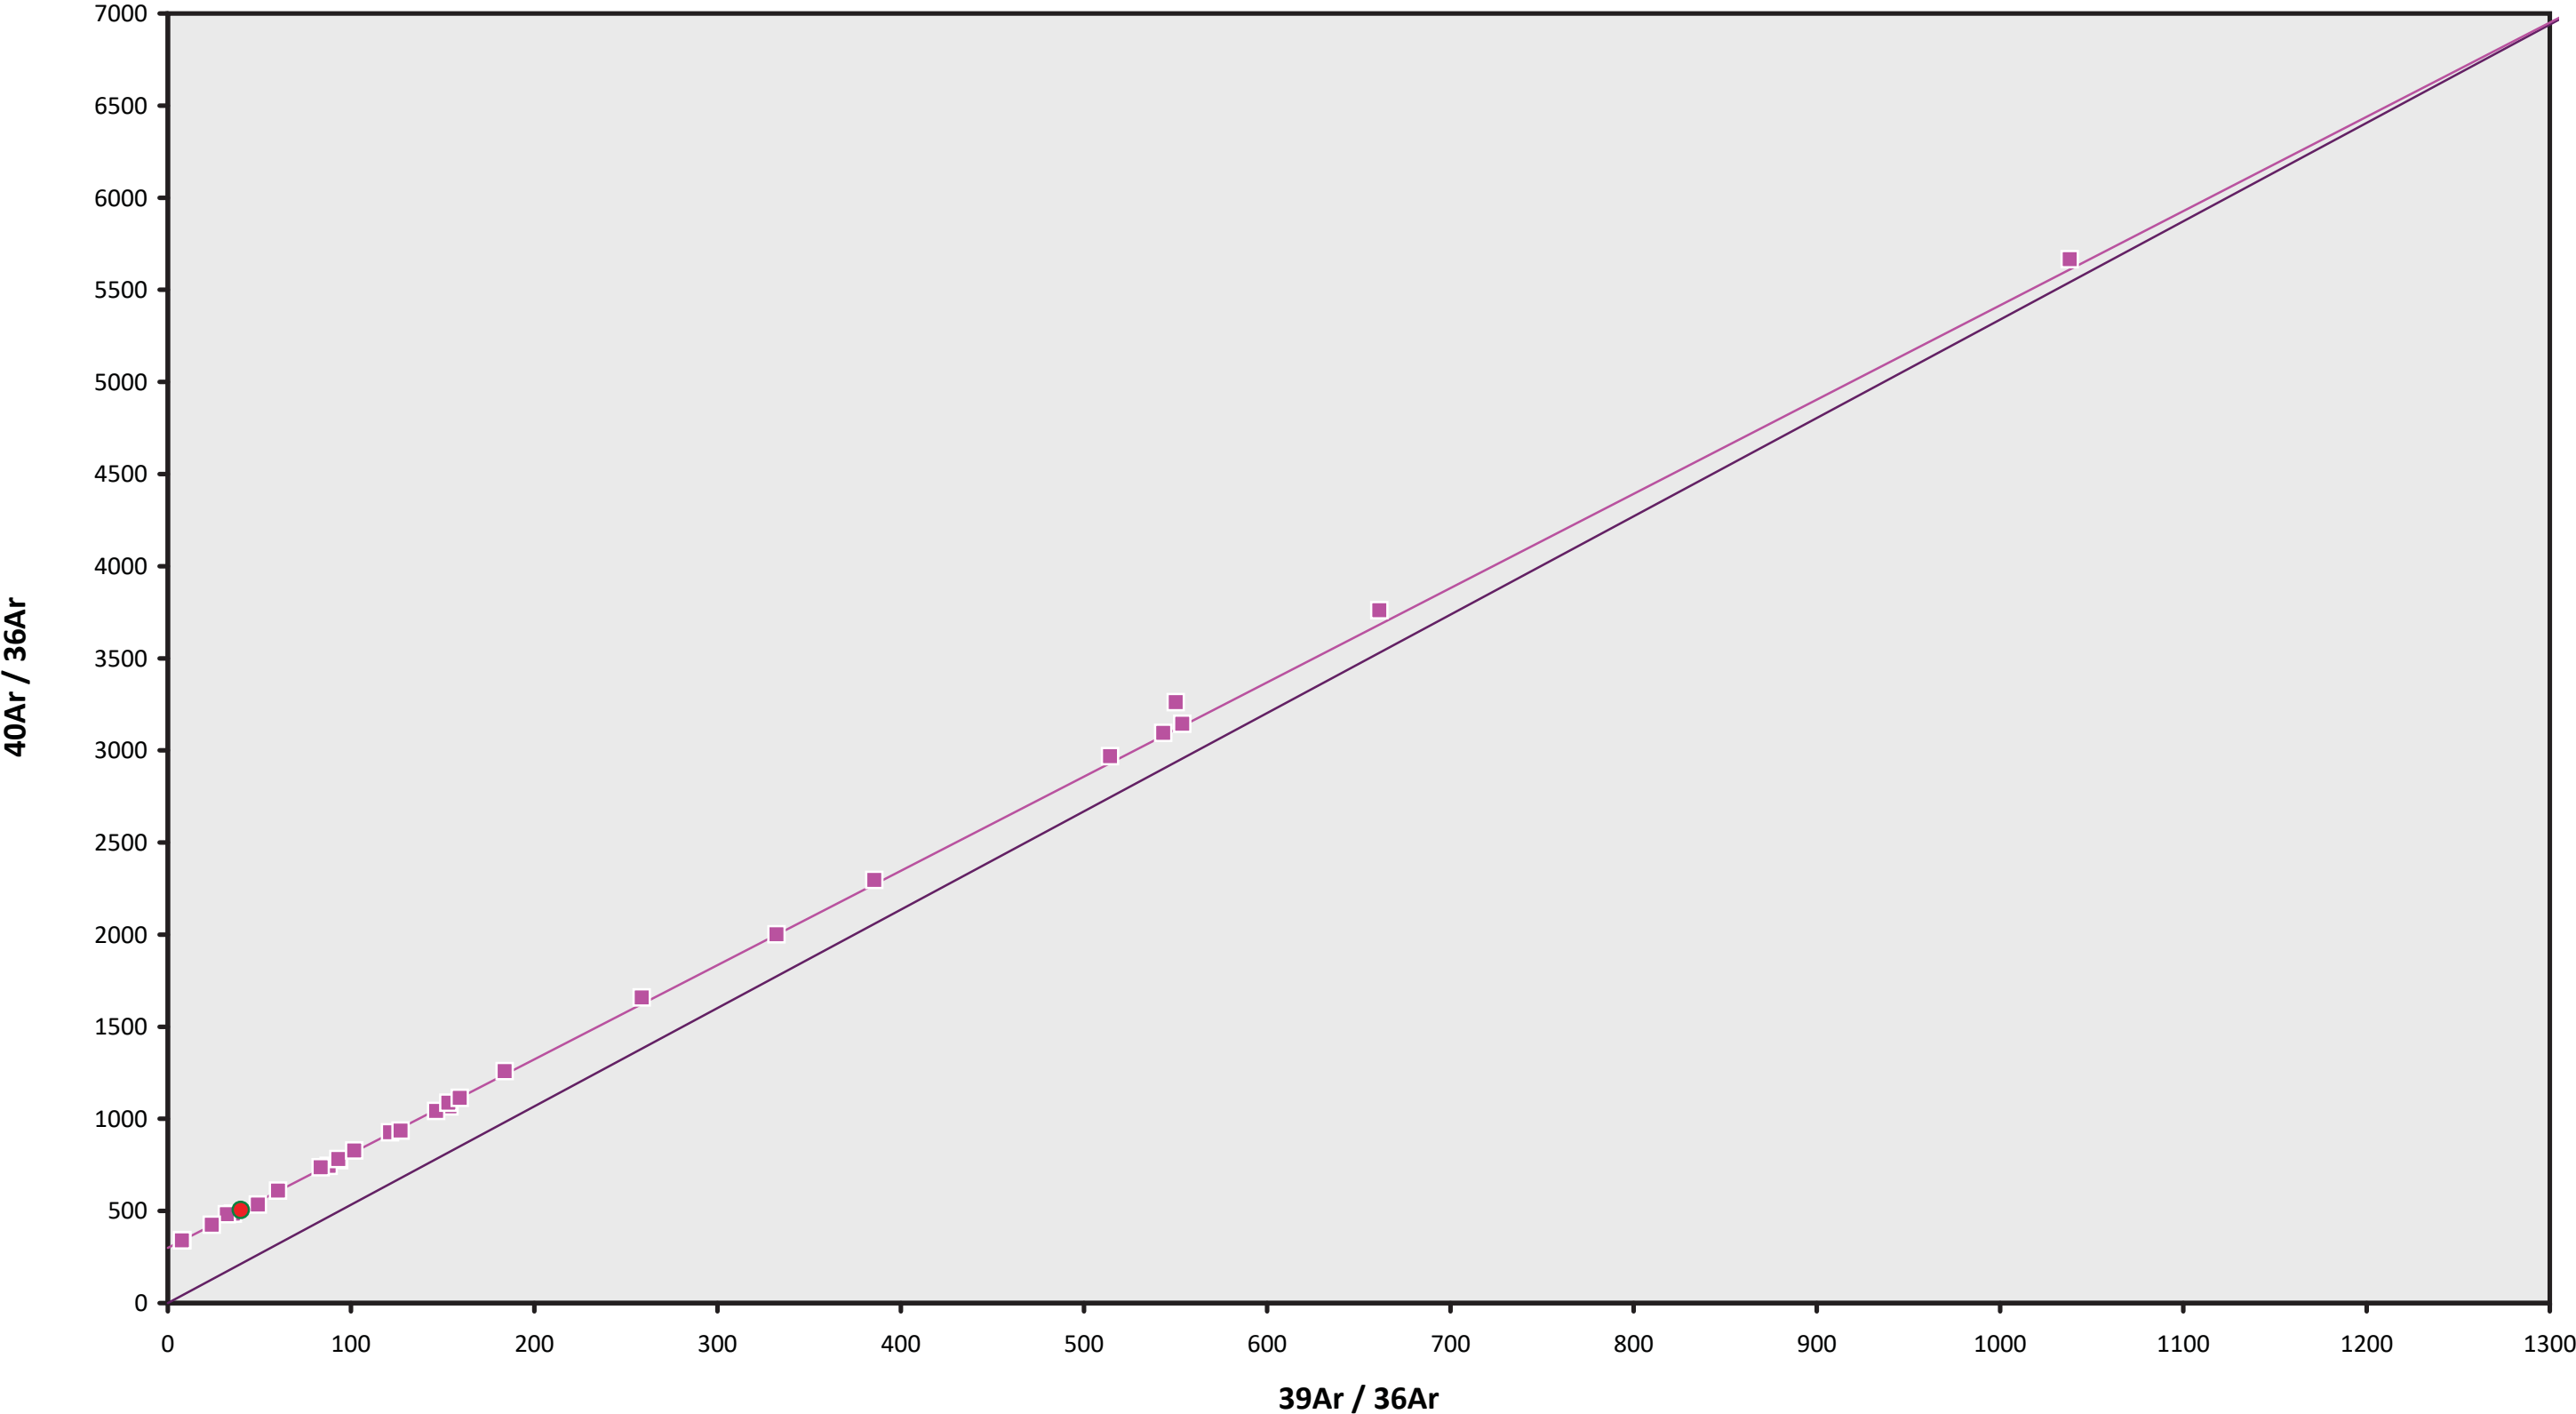

Ar-Ages in Ma

WEIGHTED PLATEAU

$15.52 \pm 0.10$

TOTAL FUSION

$15.59 \pm 0.09$

NORMAL ISOCHRON

$15.43 \pm 0.13$

INVERSE ISOCHRON

$15.48 \pm 0.12$

MSWD (PROBABILITY)

3.41 (0%)

CALCULATED  $^{40}\text{Ar}/^{36}\text{Ar}$  INTERCEPT

$300.1 \pm 2.0$

Sample Info

Plagioclase

Birch Creek

Dan Miggins

IRR = 21-OSU-04 (4X5-21)

$J = 0.00165439 \pm 0.00000187$



21F16516.AGE >>> VS19-068 >>> OREGON | SWENTON (20-01) PROJECT

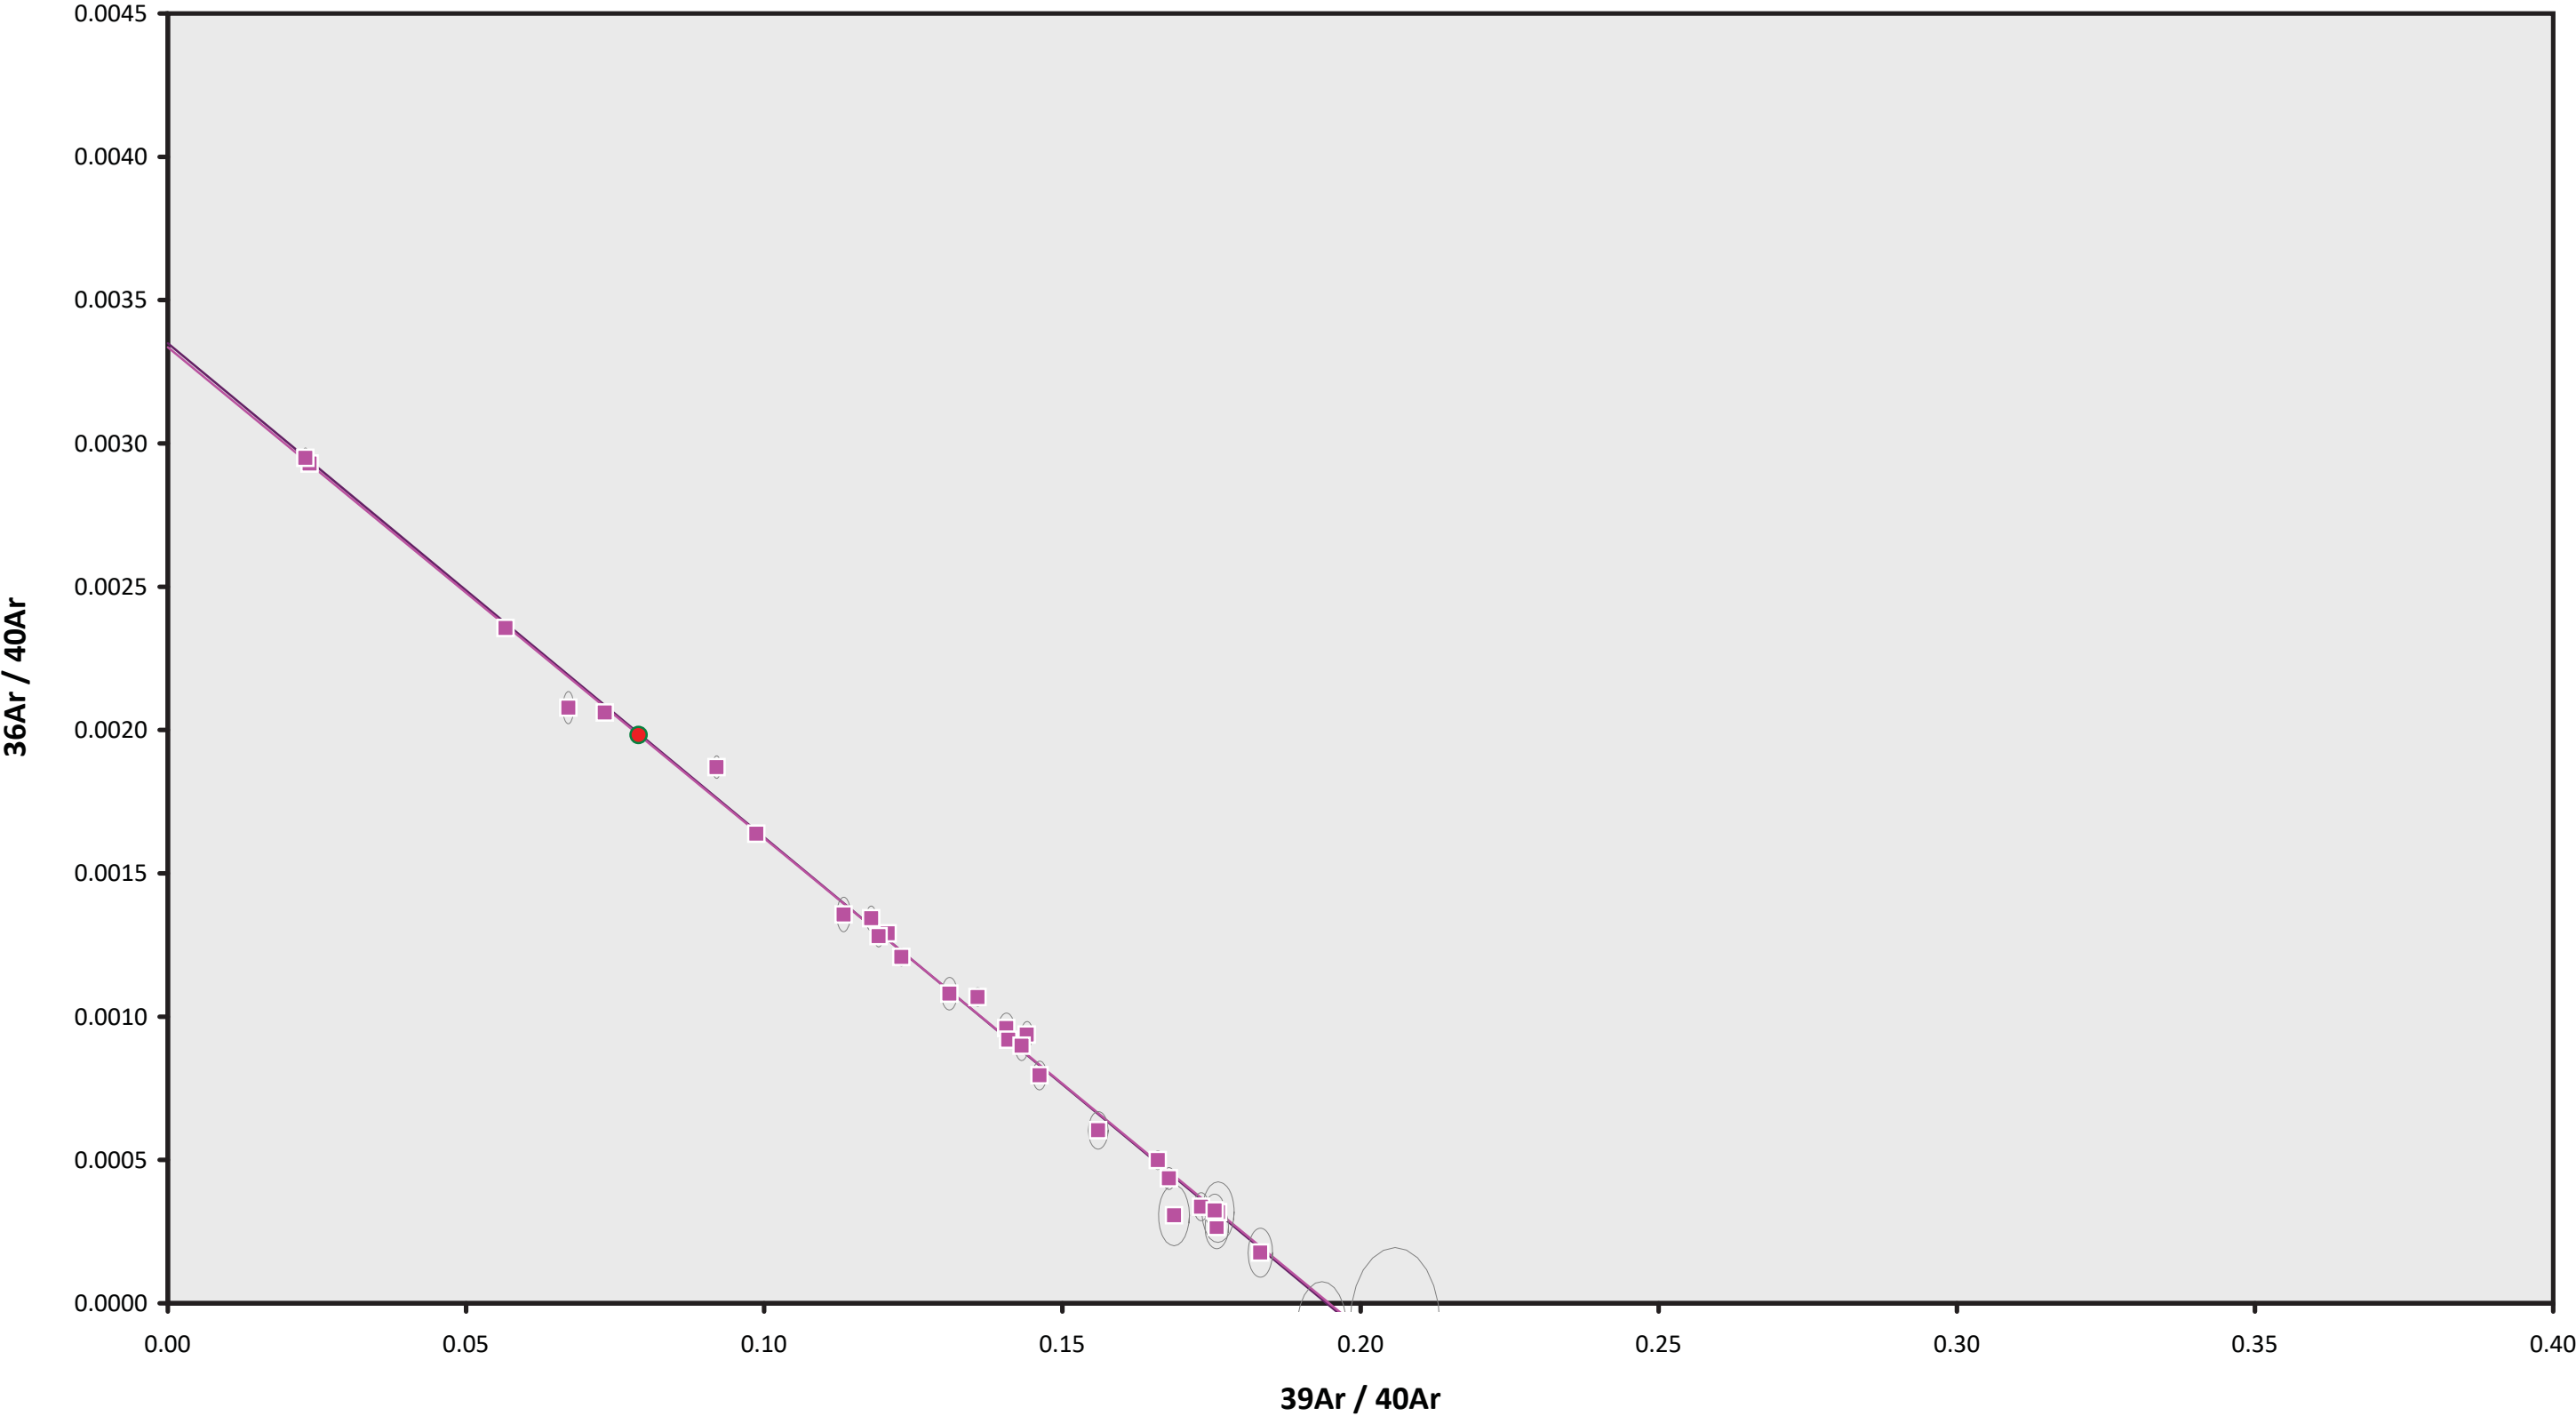

Ar-Ages in Ma

WEIGHTED PLATEAU

$15.52 \pm 0.10$

TOTAL FUSION

$15.59 \pm 0.09$

NORMAL ISOCHRON

$15.43 \pm 0.13$

INVERSE ISOCHRON

$15.48 \pm 0.12$

MSWD (PROBABILITY)

3.26 (0%)

SPREADING FACTOR

93.8%

CALCULATED  $^{40}\text{Ar}/^{36}\text{Ar}$  INTERCEPT

$299.8 \pm 2.0$

Sample Info

Plagioclase

Birch Creek

Dan Miggins

IRR = 21-OSU-04 (4X5-21)

$J = 0.00165439 \pm 0.00000187$

| Relative Abundances |        |   | 36Ar<br>[fA] | %1σ   | 37Ar<br>[fA] | %1σ   | 38Ar<br>[fA] | %1σ   | 39Ar<br>[fA] | %1σ   | 40Ar<br>[fA] | %1σ   | 40(r)/39(k) ± 2σ | Age ± 2σ<br>(Ma) | 40Ar(r)<br>(%) | 39Ar(k)<br>(%) | K/Ca ± 2σ    |
|---------------------|--------|---|--------------|-------|--------------|-------|--------------|-------|--------------|-------|--------------|-------|------------------|------------------|----------------|----------------|--------------|
| 20F24164            | 17.0 % | ✓ | 0.521207     | 0.266 | 72.4419      | 0.462 | 0.581295     | 1.568 | 41.17488     | 0.051 | 355.7293     | 0.009 | 5.00723 ±0.02224 | 15.09 ±0.07      | 57.89          | 5.36           | 0.244 ±0.002 |
| 20F24165            | 17.0 % | ✓ | 0.637690     | 0.246 | 68.9269      | 0.470 | 0.575199     | 1.649 | 37.77056     | 0.051 | 377.2885     | 0.009 | 5.10094 ±0.02739 | 15.37 ±0.08      | 51.01          | 4.91           | 0.235 ±0.002 |
| 20F24167            | 17.0 % | ✓ | 0.337490     | 0.305 | 51.8176      | 0.503 | 0.381310     | 2.492 | 26.99294     | 0.053 | 235.4243     | 0.012 | 5.14950 ±0.02479 | 15.51 ±0.07      | 58.97          | 3.51           | 0.224 ±0.002 |
| 20F24168            | 17.0 % | ✓ | 0.428699     | 0.263 | 60.1557      | 0.487 | 0.456183     | 2.098 | 31.23229     | 0.053 | 283.6110     | 0.011 | 5.14381 ±0.02387 | 15.50 ±0.07      | 56.58          | 4.06           | 0.223 ±0.002 |
| 20F24170            | 17.0 % | ✓ | 0.116434     | 0.511 | 27.4371      | 0.692 | 0.188455     | 4.854 | 13.17474     | 0.081 | 99.2599      | 0.026 | 5.06979 ±0.02905 | 15.28 ±0.09      | 67.20          | 1.71           | 0.206 ±0.003 |
| 20F24171            | 17.0 % | ✓ | 0.468517     | 0.249 | 57.4766      | 0.494 | 0.469294     | 1.852 | 30.80039     | 0.052 | 288.7469     | 0.012 | 4.98924 ±0.02511 | 15.03 ±0.08      | 53.16          | 4.01           | 0.230 ±0.002 |
| 20F24173            | 17.0 % | ✓ | 0.326995     | 0.311 | 42.0694      | 0.538 | 0.331739     | 2.876 | 22.24874     | 0.060 | 205.2186     | 0.014 | 4.99388 ±0.02952 | 15.05 ±0.09      | 54.08          | 2.89           | 0.227 ±0.002 |
| 20F24174            | 17.0 % | ✓ | 0.945604     | 0.214 | 82.5862      | 0.457 | 0.688783     | 1.346 | 41.67810     | 0.050 | 482.6430     | 0.007 | 4.97208 ±0.03257 | 14.98 ±0.10      | 42.88          | 5.42           | 0.217 ±0.002 |
| 20F24176            | 17.0 % | ✓ | 0.499533     | 0.272 | 52.6299      | 0.489 | 0.424004     | 2.046 | 27.50950     | 0.057 | 266.9211     | 0.011 | 4.44069 ±0.03198 | 13.39 ±0.10      | 45.71          | 3.58           | 0.224 ±0.002 |
| 20F24177            | 17.0 % | ✓ | 0.305859     | 0.304 | 58.4114      | 0.484 | 0.416384     | 2.178 | 29.04632     | 0.054 | 232.3475     | 0.012 | 5.02353 ±0.02101 | 15.14 ±0.06      | 62.72          | 3.78           | 0.214 ±0.002 |
| 20F24179            | 17.0 % | ✓ | 0.790486     | 0.226 | 82.3201      | 0.454 | 0.762307     | 1.214 | 48.61493     | 0.047 | 479.6543     | 0.008 | 5.15344 ±0.02466 | 15.53 ±0.07      | 52.18          | 6.33           | 0.254 ±0.002 |
| 20F24180            | 17.0 % | ✓ | 0.531674     | 0.252 | 51.9433      | 0.505 | 0.425708     | 2.349 | 27.56584     | 0.055 | 295.1072     | 0.011 | 5.10473 ±0.03194 | 15.38 ±0.10      | 47.63          | 3.59           | 0.228 ±0.002 |
| 20F24182            | 17.0 % | ✓ | 0.338497     | 0.308 | 54.0030      | 0.493 | 0.411438     | 2.276 | 28.50081     | 0.054 | 235.6857     | 0.012 | 4.88177 ±0.02370 | 14.71 ±0.07      | 58.96          | 3.71           | 0.227 ±0.002 |
| 20F24183            | 17.0 % | ✓ | 0.175392     | 0.432 | 45.3275      | 0.519 | 0.319830     | 2.779 | 21.86041     | 0.063 | 147.9314     | 0.018 | 4.54450 ±0.02219 | 13.70 ±0.07      | 67.07          | 2.84           | 0.207 ±0.002 |
| 20F24185            | 17.0 % | ✓ | 0.659323     | 0.237 | 49.9105      | 0.512 | 0.476157     | 2.017 | 27.46746     | 0.055 | 331.9975     | 0.009 | 5.07236 ±0.03760 | 15.28 ±0.11      | 41.92          | 3.57           | 0.236 ±0.002 |
| 20F24186            | 17.0 % | ✓ | 0.335041     | 0.300 | 48.7565      | 0.503 | 0.346699     | 2.801 | 22.63330     | 0.063 | 209.6903     | 0.013 | 5.02530 ±0.02888 | 15.14 ±0.09      | 54.17          | 2.94           | 0.199 ±0.002 |
| 20F24188            | 17.0 % | ✓ | 0.216840     | 0.385 | 51.2773      | 0.498 | 0.314174     | 2.805 | 22.67714     | 0.061 | 173.2004     | 0.016 | 4.97192 ±0.02372 | 14.98 ±0.07      | 65.00          | 2.95           | 0.190 ±0.002 |
| 20F24189            | 17.0 % | ✓ | 0.196082     | 0.392 | 38.4134      | 0.561 | 0.263124     | 3.167 | 18.94554     | 0.068 | 148.0732     | 0.020 | 4.89509 ±0.02615 | 14.75 ±0.08      | 62.55          | 2.46           | 0.212 ±0.002 |
| 20F24191            | 17.0 % | ✓ | 0.316097     | 0.305 | 49.6245      | 0.498 | 0.396067     | 2.309 | 27.52260     | 0.055 | 227.0627     | 0.013 | 4.97175 ±0.02284 | 14.98 ±0.07      | 60.19          | 3.58           | 0.238 ±0.002 |
| 20F24192            | 17.0 % | ✓ | 0.223621     | 0.344 | 17.5805      | 0.859 | 0.177731     | 5.038 | 11.07833     | 0.093 | 116.0715     | 0.021 | 4.58291 ±0.04437 | 13.81 ±0.13      | 43.70          | 1.44           | 0.271 ±0.005 |
| 20F24194            | 17.0 % | ✓ | 0.174972     | 0.414 | 36.3093      | 0.591 | 0.259883     | 3.607 | 18.63017     | 0.070 | 143.7533     | 0.018 | 5.07516 ±0.02518 | 15.29 ±0.08      | 65.69          | 2.42           | 0.220 ±0.003 |
| 20F24195            | 17.0 % | ✓ | 0.141354     | 0.485 | 26.9452      | 0.685 | 0.222533     | 4.130 | 16.28844     | 0.073 | 117.3723     | 0.023 | 4.75285 ±0.02688 | 14.32 ±0.08      | 65.89          | 2.12           | 0.260 ±0.004 |
| 20F24197            | 17.0 % | ✓ | 0.210076     | 0.368 | 49.3736      | 0.508 | 0.338628     | 2.416 | 25.56216     | 0.056 | 186.2855     | 0.014 | 4.99537 ±0.01969 | 15.05 ±0.06      | 68.46          | 3.33           | 0.222 ±0.002 |
| 20F24198            | 17.0 % | ✓ | 0.278639     | 0.335 | 36.4033      | 0.548 | 0.295317     | 3.057 | 20.77534     | 0.062 | 183.3101     | 0.015 | 4.96555 ±0.02885 | 14.96 ±0.09      | 56.21          | 2.70           | 0.245 ±0.003 |
| 20F24200            | 17.0 % | ✓ | 0.145491     | 0.439 | 28.6107      | 0.642 | 0.202716     | 4.607 | 14.20361     | 0.079 | 114.2932     | 0.022 | 5.15718 ±0.02907 | 15.54 ±0.09      | 64.01          | 1.85           | 0.213 ±0.003 |
| 20F24201            | 17.0 % | ✓ | 0.457570     | 0.262 | 61.3982      | 0.476 | 0.355077     | 2.645 | 21.21002     | 0.063 | 226.6291     | 0.013 | 4.48545 ±0.03678 | 13.52 ±0.11      | 41.90          | 2.76           | 0.148 ±0.001 |
| 20F24203            | 17.0 % | ✓ | 0.223444     | 0.369 | 36.2711      | 0.539 | 0.234952     | 4.143 | 18.62778     | 0.065 | 158.7680     | 0.018 | 5.10481 ±0.02844 | 15.38 ±0.09      | 59.82          | 2.42           | 0.221 ±0.002 |
| 20F24204            | 17.0 % | ✓ | 0.349526     | 0.305 | 51.6580      | 0.486 | 0.305850     | 3.094 | 21.63825     | 0.060 | 207.4862     | 0.014 | 4.96585 ±0.03173 | 14.96 ±0.10      | 51.71          | 2.81           | 0.180 ±0.002 |
| 20F24206            | 17.0 % | ✓ | 0.229459     | 0.345 | 32.0082      | 0.593 | 0.282827     | 3.365 | 18.74378     | 0.065 | 158.0265     | 0.016 | 4.91858 ±0.02724 | 14.82 ±0.08      | 58.28          | 2.44           | 0.252 ±0.003 |
| 20F24207            | 17.0 % | ✓ | 0.496764     | 0.292 | 56.0524      | 0.494 | 0.524485     | 1.732 | 34.52651     | 0.051 | 308.7138     | 0.010 | 4.78112 ±0.02712 | 14.41 ±0.08      | 53.42          | 4.49           | 0.265 ±0.003 |
| Σ                   |        |   | 11.078374    | 0.056 | 1478.1393    | 0.096 | 11.428150    | 0.442 | 768.70087    | 0.011 | 6996.3023    | 0.002 |                  |                  |                |                |              |

| Information on Analysis and Constants Used in Calculations |                                                              |
|------------------------------------------------------------|--------------------------------------------------------------|
| Project = <b>SWENTON (20-01)</b>                           | Age Equations = <b>Min et al. (2000)</b>                     |
| Sample = <b>VS19-079</b>                                   | Negative Intensities = <b>Allowed</b>                        |
| Material = <b>Plagioclase</b>                              | Collector Calibrations = <b>36Ar</b>                         |
| Location = <b>Rhyolite Dome</b>                            | Decay 40K = <b>5.463 ±0.107 E-10 1/a</b>                     |
| Region = <b>Eastern Oregon</b>                             | Decay 39Ar = <b>2.940 ±0.016 E-07 1/h</b>                    |
| Analyst = <b>Dan Miggins</b>                               | Decay 37Ar = <b>8.230 ±0.012 E-04 1/h</b>                    |
| Irradiation = <b>20-OSU-01 (1D3-20)</b>                    | Decay 36Cl = <b>2.257 ±0.015 E-06 1/a</b>                    |
| Position = <b>X: 0   Y: 0   Z/H: 2.086571 mm</b>           | Decay 40K(EC,β <sup>+</sup> ) = <b>0.580 ±0.014 E-10 1/a</b> |
| FCT-NM Age = <b>28.201 ±0.023 Ma</b>                       | Decay 40K(β <sup>-</sup> ) = <b>4.884 ±0.099 E-10 1/a</b>    |
| FCT-NM Reference = <b>Kuiper et al (2008)</b>              | Atmospheric 40/36(a) = <b>298.56 ±0.31</b>                   |
| FCT-NM 40Ar/39Ar Ratio = <b>9.39301 ±0.00676</b>           | Atmospheric 38/36(a) = <b>0.1885 ±0.0003</b>                 |
| FCT-NMJ-value = <b>0.00165288 ±0.00000119</b>              | Production 39/37(ca) = <b>0.0006425 ±0.0000059</b>           |
| Air Shot 40Ar/36Ar = <b>298.2190 ±0.3668</b>               | Production 38/37(ca) = <b>0.0001800 ±0.0000173</b>           |
| Air Shot MDF = <b>1.00028623 ±0.00040367 (LIN)</b>         | Production 36/37(ca) = <b>0.0002703 ±0.0000005</b>           |
| Experiment Type = <b>Total Fusion</b>                      | Production 40/39(k) = <b>0.000607 ±0.000059</b>              |
| Extraction Method = <b>Single Crystal Laser Heating</b>    | Production 38/39(k) = <b>0.012077 ±0.000011</b>              |
| Heating = <b>62 sec</b>                                    | Production 36/38(cl) = <b>262.80 ±1.71</b>                   |
| Isolation = <b>1.62 min</b>                                | Scaling Ratio K/Ca = <b>0.430</b>                            |
| Instrument = <b>ARGUS-VI-F</b>                             | Abundance Ratio 40K/K = <b>1.1700 ±0.0100 E-04</b>           |
| Preferred Age = <b>Ideogram Age</b>                        | Atomic Weight K = <b>39.0983 ±0.0001 g</b>                   |
| Age Classification = <b>Eruption Age</b>                   |                                                              |
| IGSN = <b>Undefined</b>                                    |                                                              |
| Rock Class = <b>Undefined</b>                              |                                                              |
| Lithology = <b>Undefined</b>                               |                                                              |
| Lat-Lon = <b>Undefined - Undefined</b>                     |                                                              |

| Results                         | 40(a)/36(a) ± 2σ        | 40(r)/39(k) ± 2σ                        | Age ± 2σ<br>(Ma)      | M\$WD              | 39Ar(k)<br>(%,n)                           | K/Ca ± 2σ    |
|---------------------------------|-------------------------|-----------------------------------------|-----------------------|--------------------|--------------------------------------------|--------------|
| Age Plateau<br>Error Mean       |                         | 4.95836 ±0.06606<br>±1.33%              | 14.94 ±0.20<br>±1.33% | >100<br>0%         | 100.00<br>30                               | 0.216 ±0.011 |
|                                 |                         | Full External Error<br>Analytical Error | ±0.80<br>±0.20        | 1.53<br>>10        | 2σ Confidence Limit<br>Error Magnification |              |
| Total Fusion Age                |                         | 4.95938 ±0.00526<br>±0.11%              | 14.94 ±0.03<br>±0.18% |                    | 30                                         | 0.223 ±0.000 |
|                                 |                         | Full External Error<br>Analytical Error | ±0.78<br>±0.02        |                    |                                            |              |
| Normal Isochron<br>Error Chron  | 306.03 ±18.34<br>±5.99% | 4.83961 ±0.24144<br>±4.99%              | 14.58 ±0.73<br>±4.97% | >100<br>0%         | 100.00<br>30                               |              |
|                                 |                         | Full External Error<br>Analytical Error | ±1.05<br>±0.72        | 1.53<br>>10        | 2σ Confidence Limit<br>Error Magnification |              |
|                                 |                         |                                         |                       | 24<br>0.0000391312 | Number of Iterations<br>Convergence        |              |
| Inverse Isochron<br>Error Chron | 304.27 ±17.59<br>±5.78% | 4.88926 ±0.22356<br>±4.57%              | 14.73 ±0.67<br>±4.56% | >100<br>0%         | 100.00<br>30                               |              |
|                                 |                         | Full External Error<br>Analytical Error | ±1.02<br>±0.67        | 1.53<br>>10        | 2σ Confidence Limit<br>Error Magnification |              |
|                                 |                         |                                         |                       | 3<br>0.0002024400  | Number of Iterations<br>Convergence        |              |
|                                 |                         |                                         |                       | 32%                | Spreading Factor                           |              |

| Incremental Heating |        |   | 36Ar(a)<br>[fA] | 37Ar(ca)<br>[fA] | 38Ar(cl)<br>[fA] | 39Ar(k)<br>[fA] | 40Ar(r)<br>[fA] | Age ± 2σ<br>(Ma) | 40Ar(r)<br>(%) | 39Ar(k)<br>(%) | K/Ca ± 2σ    |
|---------------------|--------|---|-----------------|------------------|------------------|-----------------|-----------------|------------------|----------------|----------------|--------------|
| 20F24164            | 17.0 % | ✓ | 0.501626        | 72.4419          | 0.0000000        | 41.12834        | 205.9389        | 15.09 ±0.07      | 57.89          | 5.36           | 0.244 ±0.002 |
| 20F24165            | 17.0 % | ✓ | 0.619059        | 68.9269          | 0.0000000        | 37.72628        | 192.4394        | 15.37 ±0.08      | 51.01          | 4.91           | 0.235 ±0.002 |
| 20F24167            | 17.0 % | ✓ | 0.323483        | 51.8176          | 0.0000000        | 26.95965        | 138.8288        | 15.51 ±0.07      | 58.97          | 3.51           | 0.224 ±0.002 |
| 20F24168            | 17.0 % | ✓ | 0.412439        | 60.1557          | 0.0000000        | 31.19364        | 160.4542        | 15.50 ±0.07      | 56.58          | 4.06           | 0.223 ±0.002 |
| 20F24170            | 17.0 % | ✓ | 0.109017        | 27.4371          | 0.0040680        | 13.15712        | 66.7038         | 15.28 ±0.09      | 67.20          | 1.71           | 0.206 ±0.003 |
| 20F24171            | 17.0 % | ✓ | 0.452980        | 57.4766          | 0.0020315        | 30.76346        | 153.4864        | 15.03 ±0.08      | 53.16          | 4.01           | 0.230 ±0.002 |
| 20F24173            | 17.0 % | ✓ | 0.315624        | 42.0694          | 0.0000000        | 22.22171        | 110.9725        | 15.05 ±0.09      | 54.08          | 2.89           | 0.227 ±0.002 |
| 20F24174            | 17.0 % | ✓ | 0.923281        | 82.5862          | 0.0000000        | 41.62504        | 206.9631        | 14.98 ±0.10      | 42.88          | 5.42           | 0.217 ±0.002 |
| 20F24176            | 17.0 % | ✓ | 0.485307        | 52.6299          | 0.0000000        | 27.47568        | 122.0111        | 13.39 ±0.10      | 45.71          | 3.58           | 0.224 ±0.002 |
| 20F24177            | 17.0 % | ✓ | 0.290071        | 58.4114          | 0.0008524        | 29.00879        | 145.7264        | 15.14 ±0.06      | 62.72          | 3.78           | 0.214 ±0.002 |
| 20F24179            | 17.0 % | ✓ | 0.768232        | 82.3201          | 0.0161941        | 48.56204        | 250.2616        | 15.53 ±0.07      | 52.18          | 6.33           | 0.254 ±0.002 |
| 20F24180            | 17.0 % | ✓ | 0.517633        | 51.9433          | 0.0000000        | 27.53247        | 140.5459        | 15.38 ±0.10      | 47.63          | 3.59           | 0.228 ±0.002 |
| 20F24182            | 17.0 % | ✓ | 0.323900        | 54.0030          | 0.0000000        | 28.46611        | 138.9650        | 14.71 ±0.07      | 58.96          | 3.71           | 0.227 ±0.002 |
| 20F24183            | 17.0 % | ✓ | 0.163136        | 45.3275          | 0.0172637        | 21.83128        | 99.2123         | 13.70 ±0.07      | 67.07          | 2.84           | 0.207 ±0.002 |
| 20F24185            | 17.0 % | ✓ | 0.645829        | 49.9105          | 0.0140970        | 27.43539        | 139.1622        | 15.28 ±0.11      | 41.92          | 3.57           | 0.236 ±0.002 |
| 20F24186            | 17.0 % | ✓ | 0.321861        | 48.7565          | 0.0042877        | 22.60198        | 113.5817        | 15.14 ±0.09      | 54.17          | 2.94           | 0.199 ±0.002 |
| 20F24188            | 17.0 % | ✓ | 0.202980        | 51.2773          | 0.0000000        | 22.64419        | 112.5851        | 14.98 ±0.07      | 65.00          | 2.95           | 0.190 ±0.002 |
| 20F24189            | 17.0 % | ✓ | 0.185699        | 38.4134          | 0.0000000        | 18.92086        | 92.6194         | 14.75 ±0.08      | 62.55          | 2.46           | 0.212 ±0.002 |
| 20F24191            | 17.0 % | ✓ | 0.302683        | 49.6245          | 0.0000000        | 27.49072        | 136.6769        | 14.98 ±0.07      | 60.19          | 3.58           | 0.238 ±0.002 |
| 20F24192            | 17.0 % | ✓ | 0.218869        | 17.5805          | 0.0000000        | 11.06704        | 50.7192         | 13.81 ±0.13      | 43.70          | 1.44           | 0.271 ±0.005 |
| 20F24194            | 17.0 % | ✓ | 0.165157        | 36.3093          | 0.0000000        | 18.60684        | 94.4327         | 15.29 ±0.08      | 65.69          | 2.42           | 0.220 ±0.003 |
| 20F24195            | 17.0 % | ✓ | 0.134071        | 26.9452          | 0.0000000        | 16.27113        | 77.3343         | 14.32 ±0.08      | 65.89          | 2.12           | 0.260 ±0.004 |
| 20F24197            | 17.0 % | ✓ | 0.196731        | 49.3736          | 0.0000000        | 25.53044        | 127.5340        | 15.05 ±0.06      | 68.46          | 3.33           | 0.222 ±0.002 |
| 20F24198            | 17.0 % | ✓ | 0.268799        | 36.4033          | 0.0000000        | 20.75195        | 103.0448        | 14.96 ±0.09      | 56.21          | 2.70           | 0.245 ±0.003 |
| 20F24200            | 17.0 % | ✓ | 0.137758        | 28.6107          | 0.0002841        | 14.18523        | 73.1557         | 15.54 ±0.09      | 64.01          | 1.85           | 0.213 ±0.003 |
| 20F24201            | 17.0 % | ✓ | 0.440973        | 61.3982          | 0.0052255        | 21.17057        | 94.9595         | 13.52 ±0.11      | 41.90          | 2.76           | 0.148 ±0.001 |
| 20F24203            | 17.0 % | ✓ | 0.213640        | 36.2711          | 0.0000000        | 18.60447        | 94.9724         | 15.38 ±0.09      | 59.82          | 2.42           | 0.221 ±0.002 |
| 20F24204            | 17.0 % | ✓ | 0.335563        | 51.6580          | 0.0000000        | 21.60506        | 107.2875        | 14.96 ±0.10      | 51.71          | 2.81           | 0.180 ±0.002 |
| 20F24206            | 17.0 % | ✓ | 0.220805        | 32.0082          | 0.0093237        | 18.72322        | 92.0915         | 14.82 ±0.08      | 58.28          | 2.44           | 0.252 ±0.003 |
| 20F24207            | 17.0 % | ✓ | 0.481611        | 56.0524          | 0.0070705        | 34.49050        | 164.9031        | 14.41 ±0.08      | 53.42          | 4.49           | 0.265 ±0.003 |
| Σ                   |        |   | 10.678814       | 1478.1393        | 0.0806982        | 767.75117       | 3807.5695       |                  |                |                |              |

| Information on Analysis                                                                                                                                                                                                                                   | Results                   | 40(r)/39(k) ± 2σ          | Age ± 2σ<br>(Ma)                                                              | MSWD                      | 39Ar(k)<br>(%,n)                                           | K/Ca ± 2σ     |
|-----------------------------------------------------------------------------------------------------------------------------------------------------------------------------------------------------------------------------------------------------------|---------------------------|---------------------------|-------------------------------------------------------------------------------|---------------------------|------------------------------------------------------------|---------------|
| Project = SWENTON (20-01)<br>Sample = VS19-079<br>Material = Plagioclase<br>Location = Rhyolite Dome<br>Region = Eastern Oregon<br>Analyst = Dan Miggins<br>Irradiation = 20-OSU-01 (1D3-20)<br>J = 0.00165288 ± 0.00000119<br>FCT-NM = 28.201 ± 0.023 Ma | Age Plateau<br>Error Mean | 4.95836 ± 0.06606 ± 1.33% | 14.94 ± 0.20 ± 1.33%<br>Full External Error ± 0.80<br>Analytical Error ± 0.20 | >100<br>0%<br>1.53<br>>10 | 100.00<br>30<br>2σ Confidence Limit<br>Error Magnification | 0.216 ± 0.011 |
|                                                                                                                                                                                                                                                           | Total Fusion Age          | 4.95938 ± 0.00526 ± 0.11% | 14.94 ± 0.03 ± 0.18%<br>Full External Error ± 0.78<br>Analytical Error ± 0.02 |                           | 30                                                         | 0.223 ± 0.000 |

| Normal Isochron |        |   | 39(k)/36(a) ± 2σ | 40(a+r)/36(a) ± 2σ | r.i.   |
|-----------------|--------|---|------------------|--------------------|--------|
| 20F24164        | 17.0 % | ✓ | 81.99 ±0.46      | 709.10 ±3.94       | 0.9829 |
| 20F24165        | 17.0 % | ✓ | 60.94 ±0.31      | 609.42 ±3.09       | 0.9800 |
| 20F24167        | 17.0 % | ✓ | 83.34 ±0.54      | 727.73 ±4.65       | 0.9856 |
| 20F24168        | 17.0 % | ✓ | 75.63 ±0.42      | 687.60 ±3.77       | 0.9807 |
| 20F24170        | 17.0 % | ✓ | 120.69 ±1.34     | 910.43 ±9.99       | 0.9882 |
| 20F24171        | 17.0 % | ✓ | 67.91 ±0.36      | 637.40 ±3.29       | 0.9795 |
| 20F24173        | 17.0 % | ✓ | 70.41 ±0.46      | 650.16 ±4.20       | 0.9820 |
| 20F24174        | 17.0 % | ✓ | 45.08 ±0.20      | 522.72 ±2.29       | 0.9743 |
| 20F24176        | 17.0 % | ✓ | 56.62 ±0.32      | 549.97 ±3.08       | 0.9791 |
| 20F24177        | 17.0 % | ✓ | 100.01 ±0.65     | 800.94 ±5.16       | 0.9855 |
| 20F24179        | 17.0 % | ✓ | 63.21 ±0.30      | 624.32 ±2.91       | 0.9794 |
| 20F24180        | 17.0 % | ✓ | 53.19 ±0.28      | 570.08 ±2.96       | 0.9771 |
| 20F24182        | 17.0 % | ✓ | 87.89 ±0.57      | 727.60 ±4.69       | 0.9855 |
| 20F24183        | 17.0 % | ✓ | 133.82 ±1.26     | 906.72 ±8.45       | 0.9902 |
| 20F24185        | 17.0 % | ✓ | 42.48 ±0.21      | 514.04 ±2.50       | 0.9744 |
| 20F24186        | 17.0 % | ✓ | 70.22 ±0.45      | 651.45 ±4.09       | 0.9796 |
| 20F24188        | 17.0 % | ✓ | 111.56 ±0.93     | 853.22 ±7.05       | 0.9883 |
| 20F24189        | 17.0 % | ✓ | 101.89 ±0.86     | 797.32 ±6.63       | 0.9858 |
| 20F24191        | 17.0 % | ✓ | 90.82 ±0.59      | 750.11 ±4.79       | 0.9845 |
| 20F24192        | 17.0 % | ✓ | 50.56 ±0.37      | 530.29 ±3.74       | 0.9646 |
| 20F24194        | 17.0 % | ✓ | 112.66 ±1.00     | 870.33 ±7.67       | 0.9867 |
| 20F24195        | 17.0 % | ✓ | 121.36 ±1.26     | 875.38 ±8.99       | 0.9889 |
| 20F24197        | 17.0 % | ✓ | 129.77 ±1.03     | 946.83 ±7.47       | 0.9894 |
| 20F24198        | 17.0 % | ✓ | 77.20 ±0.54      | 681.91 ±4.74       | 0.9834 |
| 20F24200        | 17.0 % | ✓ | 102.97 ±0.97     | 829.61 ±7.73       | 0.9846 |
| 20F24201        | 17.0 % | ✓ | 48.01 ±0.27      | 513.90 ±2.80       | 0.9727 |
| 20F24203        | 17.0 % | ✓ | 87.08 ±0.68      | 743.10 ±5.76       | 0.9849 |
| 20F24204        | 17.0 % | ✓ | 64.38 ±0.42      | 618.28 ±3.94       | 0.9817 |
| 20F24206        | 17.0 % | ✓ | 84.80 ±0.62      | 715.63 ±5.15       | 0.9829 |
| 20F24207        | 17.0 % | ✓ | 71.61 ±0.44      | 640.96 ±3.87       | 0.9852 |

| Results         | 40(a)/36(a) ± 2σ      | 40(r)/39(k) ± 2σ | Age ± 2σ (Ma)             | MSWD            |
|-----------------|-----------------------|------------------|---------------------------|-----------------|
| Normal Isochron | 306.03 ±18.34         | 4.83961 ±0.24144 | 14.58 ±0.73               | >100            |
| Error Chron     | ±5.99%                | ±4.99%           | ±4.97%                    | 0%              |
|                 |                       |                  | Full External Error ±1.05 |                 |
|                 |                       |                  | Analytical Error ±0.72    |                 |
|                 |                       |                  |                           |                 |
| Statistics      | 2σ Confidence Limit   | 1.53             | Convergence               | 0.000039131241  |
|                 | Error Magnification   | >10              | Number of Iterations      | 24              |
|                 | Number of Data Points | 30               | Calculated Line           | Weighted York-2 |

| Inverse Isochron |        |   | 39(k)/40(a+r) ± 2σ   | 36(a)/40(a+r) ± 2σ     | r.i.   |
|------------------|--------|---|----------------------|------------------------|--------|
| 20F24164         | 17.0 % | ✓ | 0.1156250 ±0.0001201 | 0.00141023 ±0.00000783 | 0.0062 |
| 20F24165         | 17.0 % | ✓ | 0.0999993 ±0.0001029 | 0.00164091 ±0.00000832 | 0.0058 |
| 20F24167         | 17.0 % | ✓ | 0.1145231 ±0.0001257 | 0.00137414 ±0.00000879 | 0.0085 |
| 20F24168         | 17.0 % | ✓ | 0.1099947 ±0.0001202 | 0.00145434 ±0.00000798 | 0.0082 |
| 20F24170         | 17.0 % | ✓ | 0.1325628 ±0.0002251 | 0.00109839 ±0.00001205 | 0.0147 |
| 20F24171         | 17.0 % | ✓ | 0.1065482 ±0.0001132 | 0.00156888 ±0.00000811 | 0.0099 |
| 20F24173         | 17.0 % | ✓ | 0.1082902 ±0.0001345 | 0.00153809 ±0.00000994 | 0.0102 |
| 20F24174         | 17.0 % | ✓ | 0.0862485 ±0.0000874 | 0.00191307 ±0.00000839 | 0.0048 |
| 20F24176         | 17.0 % | ✓ | 0.1029420 ±0.0001197 | 0.00181828 ±0.00001019 | 0.0074 |
| 20F24177         | 17.0 % | ✓ | 0.1248603 ±0.0001385 | 0.00124853 ±0.00000805 | 0.0078 |
| 20F24179         | 17.0 % | ✓ | 0.1012501 ±0.0000974 | 0.00160173 ±0.00000748 | 0.0057 |
| 20F24180         | 17.0 % | ✓ | 0.0933018 ±0.0001053 | 0.00175415 ±0.00000910 | 0.0089 |
| 20F24182         | 17.0 % | ✓ | 0.1207888 ±0.0001339 | 0.00137439 ±0.00000887 | 0.0083 |
| 20F24183         | 17.0 % | ✓ | 0.1475902 ±0.0001938 | 0.00110288 ±0.00001028 | 0.0105 |
| 20F24185         | 17.0 % | ✓ | 0.0826415 ±0.0000924 | 0.00194538 ±0.00000945 | 0.0063 |
| 20F24186         | 17.0 % | ✓ | 0.1077945 ±0.0001385 | 0.00153504 ±0.00000963 | 0.0090 |
| 20F24188         | 17.0 % | ✓ | 0.1307502 ±0.0001662 | 0.00117203 ±0.00000968 | 0.0100 |
| 20F24189         | 17.0 % | ✓ | 0.1277903 ±0.0001809 | 0.00125420 ±0.00001043 | 0.0132 |
| 20F24191         | 17.0 % | ✓ | 0.1210799 ±0.0001377 | 0.00133314 ±0.00000852 | 0.0094 |
| 20F24192         | 17.0 % | ✓ | 0.0953522 ±0.0001829 | 0.00188575 ±0.00001329 | 0.0137 |
| 20F24194         | 17.0 % | ✓ | 0.1294461 ±0.0001877 | 0.00114898 ±0.00001013 | 0.0101 |
| 20F24195         | 17.0 % | ✓ | 0.1386400 ±0.0002133 | 0.00114236 ±0.00001173 | 0.0129 |
| 20F24197         | 17.0 % | ✓ | 0.1370615 ±0.0001585 | 0.00105616 ±0.00000833 | 0.0088 |
| 20F24198         | 17.0 % | ✓ | 0.1132146 ±0.0001448 | 0.00146646 ±0.00001020 | 0.0104 |
| 20F24200         | 17.0 % | ✓ | 0.1241220 ±0.0002048 | 0.00120539 ±0.00001123 | 0.0130 |
| 20F24201         | 17.0 % | ✓ | 0.0934203 ±0.0001212 | 0.00194590 ±0.00001060 | 0.0100 |
| 20F24203         | 17.0 % | ✓ | 0.1171886 ±0.0001591 | 0.00134571 ±0.00001043 | 0.0117 |
| 20F24204         | 17.0 % | ✓ | 0.1041343 ±0.0001283 | 0.00161738 ±0.00001030 | 0.0107 |
| 20F24206         | 17.0 % | ✓ | 0.1184900 ±0.0001594 | 0.00139737 ±0.00001005 | 0.0107 |
| 20F24207         | 17.0 % | ✓ | 0.1117308 ±0.0001173 | 0.00156016 ±0.00000942 | 0.0061 |

| Results          | 40(a)/36(a) ± 2σ      | 40(r)/39(k) ± 2σ | Age ± 2σ (Ma)             | MSWD            |
|------------------|-----------------------|------------------|---------------------------|-----------------|
| Inverse Isochron | 304.27 ±17.59         | 4.88926 ±0.22356 | 14.73 ±0.67               | > 100           |
| Error Chron      | ±5.78%                | ±4.57%           | ±4.56%                    | 0%              |
|                  |                       |                  | Full External Error ±1.02 |                 |
|                  |                       |                  | Analytical Error ±0.67    |                 |
|                  |                       |                  |                           |                 |
| Statistics       | 2σ Confidence Limit   | 1.53             | Convergence               | 0.0002024400    |
|                  | Error Magnification   | > 10             | Number of Iterations      | 3               |
|                  | Number of Data Points | 30               | Calculated Line           | Weighted York-2 |
|                  | Spreading Factor      | 31.8%            |                           |                 |

| Degassing Patterns |        |   | 36Ar(a)<br>[fA] | %1σ  | 36Ar(c)<br>[fA] | %1σ  | 36Ar(ca)<br>[fA] | %1σ  | 36Ar(cl)<br>[fA] | %1σ    | 37Ar(ca)<br>[fA] | %1σ  | 38Ar(a)<br>[fA] | %1σ  | 38Ar(c)<br>[fA] | %1σ  | 38Ar(k)<br>[fA] | %1σ  | 38Ar(ca)<br>[fA] | %1σ  | 38Ar(cl)<br>[fA] | %1σ    | 39Ar(k)<br>[fA] | %1σ  | 39Ar(ca)<br>[fA] | %1σ  | 40Ar(r)<br>[fA] | %1σ  | 40Ar(a)<br>[fA] | %1σ  | 40Ar(c)<br>[fA] | %1σ  | 40Ar(k)<br>[fA] | %1σ  |
|--------------------|--------|---|-----------------|------|-----------------|------|------------------|------|------------------|--------|------------------|------|-----------------|------|-----------------|------|-----------------|------|------------------|------|------------------|--------|-----------------|------|------------------|------|-----------------|------|-----------------|------|-----------------|------|-----------------|------|
| 20F24164           | 17.0 % | ✓ | 0.501626        | 0.28 | 0.0000000       | 0.00 | 0.0195811        | 0.49 | 0.0000000        | 0.00   | 72.4419          | 0.46 | 0.0945565       | 0.32 | 0.0000000       | 0.00 | 0.4967069       | 0.10 | 0.0130395        | 9.64 | 0.0000000        | 0.00   | 41.12834        | 0.05 | 0.0465439        | 1.03 | 205.9389        | 0.22 | 149.7655        | 0.30 | 0.0000000       | 0.00 | 0.0249649       | 9.65 |
| 20F24165           | 17.0 % | ✓ | 0.619059        | 0.25 | 0.0000000       | 0.00 | 0.0186309        | 0.50 | 0.0000000        | 0.00   | 68.9269          | 0.47 | 0.1166926       | 0.30 | 0.0000000       | 0.00 | 0.4556203       | 0.10 | 0.0124068        | 9.64 | 0.0000000        | 0.00   | 37.72628        | 0.05 | 0.0442855        | 1.03 | 192.4394        | 0.26 | 184.8262        | 0.27 | 0.0000000       | 0.00 | 0.0228999       | 9.65 |
| 20F24167           | 17.0 % | ✓ | 0.323483        | 0.32 | 0.0000000       | 0.00 | 0.0140063        | 0.53 | 0.0000000        | 0.00   | 51.8176          | 0.50 | 0.0609766       | 0.36 | 0.0000000       | 0.00 | 0.3255916       | 0.10 | 0.0093272        | 9.64 | 0.0000000        | 0.00   | 26.95965        | 0.05 | 0.0332928        | 1.05 | 138.8288        | 0.23 | 96.5792         | 0.34 | 0.0000000       | 0.00 | 0.0163645       | 9.65 |
| 20F24168           | 17.0 % | ✓ | 0.412439        | 0.27 | 0.0000000       | 0.00 | 0.0162601        | 0.52 | 0.0000000        | 0.00   | 60.1557          | 0.49 | 0.0777448       | 0.32 | 0.0000000       | 0.00 | 0.3767255       | 0.10 | 0.0108280        | 9.64 | 0.0000000        | 0.00   | 31.19364        | 0.05 | 0.0386501        | 1.04 | 160.4542        | 0.23 | 123.1379        | 0.29 | 0.0000000       | 0.00 | 0.0189345       | 9.65 |
| 20F24170           | 17.0 % | ✓ | 0.109017        | 0.55 | 0.0000000       | 0.00 | 0.0074163        | 0.71 | 0.0000009        | 225.48 | 27.4371          | 0.69 | 0.0205497       | 0.57 | 0.0000000       | 0.00 | 0.1588985       | 0.12 | 0.0049387        | 9.65 | 0.0040680        | 225.48 | 13.15712        | 0.08 | 0.0176284        | 1.15 | 66.7038         | 0.27 | 32.5481         | 0.56 | 0.0000000       | 0.00 | 0.0079864       | 9.65 |
| 20F24171           | 17.0 % | ✓ | 0.452980        | 0.26 | 0.0000000       | 0.00 | 0.0155359        | 0.52 | 0.0000005        | 433.76 | 57.4766          | 0.49 | 0.0853868       | 0.30 | 0.0000000       | 0.00 | 0.3715303       | 0.10 | 0.0103458        | 9.64 | 0.0020315        | 433.76 | 30.76346        | 0.05 | 0.0369287        | 1.04 | 153.4864        | 0.25 | 135.2418        | 0.28 | 0.0000000       | 0.00 | 0.0186734       | 9.65 |
| 20F24173           | 17.0 % | ✓ | 0.315624        | 0.32 | 0.0000000       | 0.00 | 0.0113714        | 0.56 | 0.0000000        | 0.00   | 42.0694          | 0.54 | 0.0594951       | 0.36 | 0.0000000       | 0.00 | 0.2683716       | 0.11 | 0.0075725        | 9.65 | 0.0000000        | 0.00   | 22.22171        | 0.06 | 0.0270296        | 1.07 | 110.9725        | 0.29 | 94.2326         | 0.34 | 0.0000000       | 0.00 | 0.0134886       | 9.65 |
| 20F24174           | 17.0 % | ✓ | 0.923281        | 0.22 | 0.0000000       | 0.00 | 0.0223231        | 0.49 | 0.0000000        | 0.00   | 82.5862          | 0.46 | 0.1740384       | 0.27 | 0.0000000       | 0.00 | 0.5027055       | 0.10 | 0.0148655        | 9.64 | 0.0000000        | 0.00   | 41.62504        | 0.05 | 0.0530617        | 1.03 | 206.9631        | 0.32 | 275.6546        | 0.24 | 0.0000000       | 0.00 | 0.0252664       | 9.65 |
| 20F24176           | 17.0 % | ✓ | 0.485307        | 0.28 | 0.0000000       | 0.00 | 0.0142259        | 0.52 | 0.0000000        | 0.00   | 52.6299          | 0.49 | 0.0914804       | 0.32 | 0.0000000       | 0.00 | 0.3318238       | 0.11 | 0.0094734        | 9.64 | 0.0000000        | 0.00   | 27.47568        | 0.06 | 0.0338147        | 1.04 | 122.0111        | 0.36 | 144.8933        | 0.30 | 0.0000000       | 0.00 | 0.0166777       | 9.65 |
| 20F24177           | 17.0 % | ✓ | 0.290071        | 0.32 | 0.0000000       | 0.00 | 0.0157886        | 0.51 | 0.0000002        | #####  | 58.4114          | 0.48 | 0.0546783       | 0.36 | 0.0000000       | 0.00 | 0.3503391       | 0.11 | 0.0105140        | 9.64 | 0.0008524        | #####  | 29.00879        | 0.05 | 0.0375293        | 1.04 | 145.7264        | 0.20 | 86.6035         | 0.34 | 0.0000000       | 0.00 | 0.0176083       | 9.65 |
| 20F24179           | 17.0 % | ✓ | 0.768232        | 0.23 | 0.0000000       | 0.00 | 0.0222511        | 0.48 | 0.0000037        | 58.76  | 82.3201          | 0.45 | 0.1448117       | 0.28 | 0.0000000       | 0.00 | 0.5864838       | 0.10 | 0.0148176        | 9.64 | 0.0161941        | 58.77  | 48.56204        | 0.05 | 0.0528906        | 1.03 | 250.2616        | 0.23 | 229.3632        | 0.26 | 0.0000000       | 0.00 | 0.0294772       | 9.65 |
| 20F24180           | 17.0 % | ✓ | 0.517633        | 0.26 | 0.0000000       | 0.00 | 0.0140403        | 0.53 | 0.0000000        | 0.00   | 51.9433          | 0.50 | 0.0975739       | 0.30 | 0.0000000       | 0.00 | 0.3325096       | 0.11 | 0.0093498        | 9.64 | 0.0000000        | 0.00   | 27.53247        | 0.06 | 0.0333736        | 1.05 | 140.5459        | 0.31 | 154.5446        | 0.28 | 0.0000000       | 0.00 | 0.0167122       | 9.65 |
| 20F24182           | 17.0 % | ✓ | 0.323900        | 0.32 | 0.0000000       | 0.00 | 0.0145970        | 0.52 | 0.0000000        | 0.00   | 54.0030          | 0.49 | 0.0610551       | 0.36 | 0.0000000       | 0.00 | 0.3437853       | 0.10 | 0.0097205        | 9.64 | 0.0000000        | 0.00   | 28.46611        | 0.05 | 0.0346969        | 1.04 | 138.9650        | 0.24 | 96.7034         | 0.34 | 0.0000000       | 0.00 | 0.0172789       | 9.65 |
| 20F24183           | 17.0 % | ✓ | 0.163136        | 0.47 | 0.0000000       | 0.00 | 0.0122520        | 0.55 | 0.0000040        | 51.88  | 45.3275          | 0.52 | 0.0307511       | 0.49 | 0.0000000       | 0.00 | 0.2636564       | 0.11 | 0.0081590        | 9.64 | 0.0172637        | 51.89  | 21.83128        | 0.06 | 0.0291229        | 1.06 | 99.2123         | 0.24 | 48.7059         | 0.48 | 0.0000000       | 0.00 | 0.0132516       | 9.65 |
| 20F24185           | 17.0 % | ✓ | 0.645829        | 0.24 | 0.0000000       | 0.00 | 0.0134908        | 0.54 | 0.0000033        | 68.82  | 49.9105          | 0.51 | 0.1217387       | 0.29 | 0.0000000       | 0.00 | 0.3313372       | 0.11 | 0.0089839        | 9.64 | 0.0140970        | 68.83  | 27.43539        | 0.06 | 0.0320675        | 1.05 | 139.1622        | 0.37 | 192.8186        | 0.26 | 0.0000000       | 0.00 | 0.0166533       | 9.65 |
| 20F24186           | 17.0 % | ✓ | 0.321861        | 0.31 | 0.0000000       | 0.00 | 0.0131789        | 0.53 | 0.0000010        | 228.09 | 48.7565          | 0.50 | 0.0606708       | 0.35 | 0.0000000       | 0.00 | 0.2729641       | 0.11 | 0.0087762        | 9.64 | 0.0042877        | 228.09 | 22.60198        | 0.06 | 0.0313260        | 1.05 | 113.5817        | 0.28 | 96.0949         | 0.33 | 0.0000000       | 0.00 | 0.0137194       | 9.65 |
| 20F24188           | 17.0 % | ✓ | 0.202980        | 0.41 | 0.0000000       | 0.00 | 0.0138603        | 0.53 | 0.0000000        | 0.00   | 51.2773          | 0.50 | 0.0382617       | 0.44 | 0.0000000       | 0.00 | 0.2734739       | 0.11 | 0.0092299        | 9.64 | 0.0000000        | 0.00   | 22.64419        | 0.06 | 0.0329457        | 1.05 | 112.5851        | 0.23 | 60.6016         | 0.43 | 0.0000000       | 0.00 | 0.0137450       | 9.65 |
| 20F24189           | 17.0 % | ✓ | 0.185699        | 0.42 | 0.0000000       | 0.00 | 0.0103831        | 0.59 | 0.0000000        | 0.00   | 38.4134          | 0.56 | 0.0350043       | 0.44 | 0.0000000       | 0.00 | 0.2285073       | 0.11 | 0.0069144        | 9.65 | 0.0000000        | 0.00   | 18.92086        | 0.07 | 0.0246806        | 1.08 | 92.6194         | 0.26 | 55.4423         | 0.43 | 0.0000000       | 0.00 | 0.0114850       | 9.65 |
| 20F24191           | 17.0 % | ✓ | 0.302683        | 0.32 | 0.0000000       | 0.00 | 0.0134135        | 0.53 | 0.0000000        | 0.00   | 49.6245          | 0.50 | 0.0570558       | 0.36 | 0.0000000       | 0.00 | 0.3320054       | 0.11 | 0.0089324        | 9.64 | 0.0000000        | 0.00   | 27.49072        | 0.06 | 0.0318838        | 1.05 | 136.6769        | 0.22 | 90.3691         | 0.34 | 0.0000000       | 0.00 | 0.0166869       | 9.65 |
| 20F24192           | 17.0 % | ✓ | 0.218869        | 0.35 | 0.0000000       | 0.00 | 0.0047520        | 0.88 | 0.0000000        | 0.00   | 17.5805          | 0.86 | 0.0412569       | 0.39 | 0.0000000       | 0.00 | 0.1336566       | 0.13 | 0.0031645        | 9.67 | 0.0000000        | 0.00   | 11.06704        | 0.09 | 0.0112955        | 1.26 | 50.7192         | 0.48 | 65.3456         | 0.37 | 0.0000000       | 0.00 | 0.0067177       | 9.65 |
| 20F24194           | 17.0 % | ✓ | 0.165157        | 0.44 | 0.0000000       | 0.00 | 0.0098144        | 0.61 | 0.0000000        | 0.00   | 36.3093          | 0.59 | 0.0311322       | 0.47 | 0.0000000       | 0.00 | 0.2247148       | 0.12 | 0.0065357        | 9.65 | 0.0000000        | 0.00   | 18.60684        | 0.07 | 0.0233287        | 1.09 | 94.4327         | 0.24 | 49.3094         | 0.45 | 0.0000000       | 0.00 | 0.0112944       | 9.65 |
| 20F24195           | 17.0 % | ✓ | 0.134071        | 0.51 | 0.0000000       | 0.00 | 0.0072833        | 0.71 | 0.0000000        | 0.00   | 26.9452          | 0.68 | 0.0252723       | 0.54 | 0.0000000       | 0.00 | 0.1965064       | 0.12 | 0.0048501        | 9.65 | 0.0000000        | 0.00   | 16.27113        | 0.07 | 0.0173123        | 1.15 | 77.3343         | 0.27 | 40.0281         | 0.52 | 0.0000000       | 0.00 | 0.0098766       | 9.65 |
| 20F24197           | 17.0 % | ✓ | 0.196731        | 0.39 | 0.0000000       | 0.00 | 0.0133457        | 0.54 | 0.0000000        | 0.00   | 49.3736          | 0.51 | 0.0370837       | 0.43 | 0.0000000       | 0.00 | 0.3083311       | 0.11 | 0.0088873        | 9.64 | 0.0000000        | 0.00   | 25.53044        | 0.06 | 0.0317226        | 1.05 | 127.5340        | 0.19 | 58.7359         | 0.41 | 0.0000000       | 0.00 | 0.0154970       | 9.65 |
| 20F24198           | 17.0 % | ✓ | 0.268799        | 0.35 | 0.0000000       | 0.00 | 0.0098398        | 0.57 | 0.0000000        | 0.00   | 36.4033          | 0.55 | 0.0506686       | 0.38 | 0.0000000       | 0.00 | 0.2506213       | 0.11 | 0.0065526        | 9.65 | 0.0000000        | 0.00   | 20.75195        | 0.06 | 0.0233891        | 1.07 | 103.0448        | 0.28 | 80.2526         | 0.36 | 0.0000000       | 0.00 | 0.0125964       | 9.65 |
| 20F24200           | 17.0 % | ✓ | 0.137758        | 0.47 | 0.0000000       | 0.00 | 0.0077335        | 0.66 | 0.0000001        | #####  | 28.6107          | 0.64 | 0.0259673       | 0.49 | 0.0000000       | 0.00 | 0.1713150       | 0.12 | 0.0051499        | 9.65 | 0.0002841        | #####  | 14.18523        | 0.08 | 0.0183823        | 1.12 | 73.1557         | 0.27 | 41.1289         | 0.48 | 0.0000000       | 0.00 | 0.0086104       | 9.65 |
| 20F24201           | 17.0 % | ✓ | 0.440973        | 0.27 | 0.0000000       | 0.00 | 0.0165959        | 0.51 | 0.0000012        | 181.54 | 61.3982          | 0.48 | 0.0831233       | 0.32 | 0.0000000       | 0.00 | 0.2556769       | 0.11 | 0.0110517        | 9.64 | 0.0052255        | 181.55 | 21.17057        | 0.06 | 0.0394483        | 1.04 | 94.9595         | 0.41 | 131.6568        | 0.29 | 0.0000000       | 0.00 | 0.0128505       | 9.65 |
| 20F24203           | 17.0 % | ✓ | 0.213640        | 0.39 | 0.0000000       | 0.00 | 0.0098041        | 0.57 | 0.0000000        | 0.00   | 36.2711          | 0.54 | 0.0402711       | 0.42 | 0.0000000       | 0.00 | 0.2246862       | 0.11 | 0.0065288        | 9.65 | 0.0000000        | 0.00   | 18.60447        | 0.07 | 0.0233042        | 1.07 | 94.9724         | 0.27 | 63.7843         | 0.40 | 0.0000000       | 0.00 | 0.0112929       | 9.65 |
| 20F24204           | 17.0 % | ✓ | 0.335563        | 0.32 | 0.0000000       | 0.00 | 0.0139632        | 0.51 | 0.0000000        | 0.00   | 51.6580          | 0.49 | 0.0632536       | 0.36 | 0.0000000       | 0.00 | 0.2609244       | 0.11 | 0.0092984        | 9.64 | 0.0000000        | 0.00   | 21.60506        | 0.06 | 0.0331903        | 1.04 | 107.2875        | 0.31 | 100.1856        | 0.33 | 0.0000000       | 0.00 | 0.0131143       | 9.65 |
| 20F24206           | 17.0 % | ✓ | 0.220805        | 0.36 | 0.0000000       | 0.00 | 0.0086518        | 0.62 | 0.0000022        | 102.48 | 32.0082          | 0.59 | 0.0416218       | 0.39 | 0.0000000       | 0.00 | 0.2261203       | 0.11 | 0.0057615        | 9.65 | 0.0093237        | 102.48 | 18.72322        | 0.07 | 0.0205652        | 1.09 | 92.0915         | 0.27 | 65.9236         | 0.37 | 0.0000000       | 0.00 | 0.0113650       | 9.65 |
| 20F24207           | 17.0 % | ✓ | 0.481611        | 0.30 | 0.0000000       | 0.00 | 0.0151510        | 0.52 | 0.0000016        | 130.34 | 56.0524          | 0.49 | 0.0907837       | 0.34 | 0.0000000       | 0.00 | 0.4165418       | 0.10 | 0.0100894        | 9.64 | 0.0070705        | 130.34 | 34.49050        | 0.05 | 0.0360137        | 1.04 | 164.9031        | 0.28 | 143.7898        | 0.32 | 0.0000000       | 0.00 | 0.0209357       | 9.65 |
| Σ                  |        |   | 10.678814       | 0.06 | 0.0000000       |      |                  |      |                  |        |                  |      |                 |      |                 |      |                 |      |                  |      |                  |        |                 |      |                  |      |                 |      |                 |      |                 |      |                 |      |

| Additional Parameters |        |   | 40Ar/39Ar | 1σ       | 37Ar/39Ar | 1σ       | 36Ar/39Ar | 1σ       | Time (days) | 37Ar (decay) | 39Ar (decay) | 40Ar (moles) |
|-----------------------|--------|---|-----------|----------|-----------|----------|-----------|----------|-------------|--------------|--------------|--------------|
| 20F24164              | 17.0 % | ✓ | 8.639475  | 0.004479 | 1.759372  | 0.008186 | 0.012658  | 0.000034 | 142.240     | 16.643137    | 1.00100503   | 1.259E-11    |
| 20F24165              | 17.0 % | ✓ | 9.988956  | 0.005131 | 1.824883  | 0.008624 | 0.016883  | 0.000042 | 142.247     | 16.645192    | 1.00100508   | 1.336E-11    |
| 20F24167              | 17.0 % | ✓ | 8.721700  | 0.004778 | 1.919673  | 0.009714 | 0.012503  | 0.000039 | 142.258     | 16.649074    | 1.00100516   | 8.334E-12    |
| 20F24168              | 17.0 % | ✓ | 9.080701  | 0.004955 | 1.926075  | 0.009428 | 0.013726  | 0.000037 | 142.264     | 16.650901    | 1.00100520   | 1.004E-11    |
| 20F24170              | 17.0 % | ✓ | 7.534105  | 0.006387 | 2.082555  | 0.014502 | 0.008838  | 0.000046 | 142.276     | 16.654784    | 1.00100528   | 3.514E-12    |
| 20F24171              | 17.0 % | ✓ | 9.374780  | 0.004972 | 1.866099  | 0.009274 | 0.015211  | 0.000039 | 142.282     | 16.656840    | 1.00100533   | 1.022E-11    |
| 20F24173              | 17.0 % | ✓ | 9.223832  | 0.005718 | 1.890868  | 0.010239 | 0.014697  | 0.000047 | 142.294     | 16.660725    | 1.00100541   | 7.265E-12    |
| 20F24174              | 17.0 % | ✓ | 11.580255 | 0.005858 | 1.981526  | 0.009111 | 0.022688  | 0.000050 | 142.300     | 16.662782    | 1.00100546   | 1.709E-11    |
| 20F24176              | 17.0 % | ✓ | 9.702870  | 0.005633 | 1.913154  | 0.009412 | 0.018159  | 0.000050 | 142.312     | 16.666668    | 1.00100554   | 9.449E-12    |
| 20F24177              | 17.0 % | ✓ | 7.999207  | 0.004428 | 2.010974  | 0.009800 | 0.010530  | 0.000033 | 142.317     | 16.668496    | 1.00100558   | 8.225E-12    |
| 20F24179              | 17.0 % | ✓ | 9.866399  | 0.004739 | 1.693308  | 0.007727 | 0.016260  | 0.000038 | 142.330     | 16.672612    | 1.00100567   | 1.698E-11    |
| 20F24180              | 17.0 % | ✓ | 10.705539 | 0.006032 | 1.884335  | 0.009570 | 0.019287  | 0.000050 | 142.335     | 16.674442    | 1.00100571   | 1.045E-11    |
| 20F24182              | 17.0 % | ✓ | 8.269439  | 0.004577 | 1.894787  | 0.009402 | 0.011877  | 0.000037 | 142.347     | 16.678331    | 1.00100579   | 8.343E-12    |
| 20F24183              | 17.0 % | ✓ | 6.767095  | 0.004437 | 2.073500  | 0.010845 | 0.008023  | 0.000035 | 142.353     | 16.680390    | 1.00100583   | 5.237E-12    |
| 20F24185              | 17.0 % | ✓ | 12.086939 | 0.006749 | 1.817079  | 0.009350 | 0.024004  | 0.000059 | 142.365     | 16.684280    | 1.00100592   | 1.175E-11    |
| 20F24186              | 17.0 % | ✓ | 9.264682  | 0.005942 | 2.154193  | 0.010913 | 0.014803  | 0.000045 | 142.372     | 16.686340    | 1.00100596   | 7.423E-12    |
| 20F24188              | 17.0 % | ✓ | 7.637668  | 0.004846 | 2.261191  | 0.011339 | 0.009562  | 0.000037 | 142.383     | 16.690231    | 1.00100604   | 6.131E-12    |
| 20F24189              | 17.0 % | ✓ | 7.815729  | 0.005524 | 2.027568  | 0.011451 | 0.010350  | 0.000041 | 142.390     | 16.692292    | 1.00100609   | 5.242E-12    |
| 20F24191              | 17.0 % | ✓ | 8.250044  | 0.004684 | 1.803046  | 0.009029 | 0.011485  | 0.000036 | 142.401     | 16.696184    | 1.00100617   | 8.038E-12    |
| 20F24192              | 17.0 % | ✓ | 10.477348 | 0.010039 | 1.586929  | 0.013714 | 0.020185  | 0.000072 | 142.407     | 16.698017    | 1.00100621   | 4.109E-12    |
| 20F24194              | 17.0 % | ✓ | 7.716158  | 0.005587 | 1.948951  | 0.011595 | 0.009392  | 0.000039 | 142.419     | 16.701911    | 1.00100629   | 5.089E-12    |
| 20F24195              | 17.0 % | ✓ | 7.205865  | 0.005538 | 1.654251  | 0.011390 | 0.008678  | 0.000043 | 142.425     | 16.703973    | 1.00100634   | 4.155E-12    |
| 20F24197              | 17.0 % | ✓ | 7.287546  | 0.004207 | 1.931513  | 0.009869 | 0.008218  | 0.000031 | 142.437     | 16.707868    | 1.00100642   | 6.595E-12    |
| 20F24198              | 17.0 % | ✓ | 8.823444  | 0.005636 | 1.752235  | 0.009659 | 0.013412  | 0.000046 | 142.443     | 16.709931    | 1.00100647   | 6.489E-12    |
| 20F24200              | 17.0 % | ✓ | 8.046770  | 0.006631 | 2.014322  | 0.013030 | 0.010243  | 0.000046 | 142.455     | 16.713828    | 1.00100655   | 4.046E-12    |
| 20F24201              | 17.0 % | ✓ | 10.685003 | 0.006915 | 2.894772  | 0.013897 | 0.021573  | 0.000058 | 142.461     | 16.715891    | 1.00100659   | 8.023E-12    |
| 20F24203              | 17.0 % | ✓ | 8.523186  | 0.005777 | 1.947153  | 0.010573 | 0.011995  | 0.000045 | 142.473     | 16.719790    | 1.00100668   | 5.620E-12    |
| 20F24204              | 17.0 % | ✓ | 9.588858  | 0.005895 | 2.387345  | 0.011690 | 0.016153  | 0.000050 | 142.478     | 16.721625    | 1.00100672   | 7.345E-12    |
| 20F24206              | 17.0 % | ✓ | 8.430876  | 0.005665 | 1.707668  | 0.010183 | 0.012242  | 0.000043 | 142.491     | 16.725754    | 1.00100680   | 5.594E-12    |
| 20F24207              | 17.0 % | ✓ | 8.941354  | 0.004687 | 1.623459  | 0.008060 | 0.014388  | 0.000043 | 142.497     | 16.727589    | 1.00100684   | 1.093E-11    |

| Procedure<br>Blanks |        | 36Ar ± 1σ (SE)<br>[fA] | 37Ar ± 1σ (SE)<br>[fA] | 38Ar ± 1σ (SE)<br>[fA] | 39Ar ± 1σ (SE)<br>[fA] | 40Ar ± 1σ (SE)<br>[fA] |
|---------------------|--------|------------------------|------------------------|------------------------|------------------------|------------------------|
| 20F24164            | 17.0 % | 0.0049879 ±0.0001585   | 0.0153285 ±0.0058027   | 0.0022616 ±0.0069006   | 0.0151427 ±0.0060337   | 1.1412177 ±0.0155735   |
| 20F24165            | 17.0 % | 0.0049879 ±0.0001585   | 0.0153285 ±0.0058027   | 0.0022616 ±0.0069006   | 0.0151427 ±0.0060337   | 1.1412177 ±0.0155735   |
| 20F24167            | 17.0 % | 0.0053330 ±0.0001651   | 0.0185990 ±0.0055850   | 0.0019630 ±0.0063171   | 0.0111615 ±0.0059170   | 1.1146935 ±0.0152629   |
| 20F24168            | 17.0 % | 0.0053330 ±0.0001651   | 0.0185990 ±0.0055850   | 0.0019630 ±0.0063171   | 0.0111615 ±0.0059170   | 1.1146935 ±0.0152629   |
| 20F24170            | 17.0 % | 0.0052561 ±0.0001666   | 0.0059928 ±0.0058221   | 0.0070978 ±0.0065721   | 0.0203970 ±0.0055482   | 1.0965964 ±0.0146692   |
| 20F24171            | 17.0 % | 0.0052561 ±0.0001666   | 0.0059928 ±0.0058221   | 0.0070978 ±0.0065721   | 0.0203970 ±0.0055482   | 1.0965964 ±0.0146692   |
| 20F24173            | 17.0 % | 0.0050033 ±0.0001764   | 0.0165005 ±0.0058366   | 0.0064121 ±0.0063595   | 0.0058059 ±0.0062200   | 1.1188482 ±0.0154292   |
| 20F24174            | 17.0 % | 0.0050033 ±0.0001764   | 0.0165005 ±0.0058366   | 0.0064121 ±0.0063595   | 0.0058059 ±0.0062200   | 1.1188482 ±0.0154292   |
| 20F24176            | 17.0 % | 0.0051653 ±0.0001621   | 0.0169131 ±0.0056205   | 0.0081547 ±0.0061900   | 0.0108189 ±0.0058093   | 1.0839408 ±0.0146272   |
| 20F24177            | 17.0 % | 0.0051653 ±0.0001621   | 0.0169131 ±0.0056205   | 0.0081547 ±0.0061900   | 0.0108189 ±0.0058093   | 1.0839408 ±0.0146272   |
| 20F24179            | 17.0 % | 0.0045944 ±0.0001711   | 0.0091529 ±0.0062311   | 0.0028668 ±0.0070391   | 0.0062738 ±0.0067121   | 1.1515991 ±0.0164315   |
| 20F24180            | 17.0 % | 0.0045944 ±0.0001711   | 0.0091529 ±0.0062311   | 0.0028668 ±0.0070391   | 0.0062738 ±0.0067121   | 1.1515991 ±0.0164315   |
| 20F24182            | 17.0 % | 0.0045887 ±0.0001598   | 0.0161792 ±0.0058218   | 0.0108477 ±0.0066531   | 0.0133057 ±0.0063960   | 1.0885180 ±0.0156315   |
| 20F24183            | 17.0 % | 0.0045887 ±0.0001598   | 0.0161792 ±0.0058218   | 0.0108477 ±0.0066531   | 0.0133057 ±0.0063960   | 1.0885180 ±0.0156315   |
| 20F24185            | 17.0 % | 0.0049430 ±0.0001758   | 0.0108947 ±0.0055007   | 0.0106508 ±0.0069052   | 0.0213879 ±0.0060775   | 1.1536108 ±0.0150534   |
| 20F24186            | 17.0 % | 0.0049430 ±0.0001758   | 0.0108947 ±0.0055007   | 0.0106508 ±0.0069052   | 0.0213879 ±0.0060775   | 1.1536108 ±0.0150534   |
| 20F24188            | 17.0 % | 0.0054718 ±0.0001749   | 0.0110942 ±0.0057758   | 0.0013647 ±0.0058918   | 0.0000070 ±0.0059845   | 1.2280419 ±0.0167770   |
| 20F24189            | 17.0 % | 0.0054718 ±0.0001749   | 0.0110942 ±0.0057758   | 0.0013647 ±0.0058918   | 0.0000070 ±0.0059845   | 1.2280419 ±0.0167770   |
| 20F24191            | 17.0 % | 0.0047325 ±0.0001701   | 0.0104340 ±0.0053813   | 0.0072828 ±0.0069656   | 0.0057140 ±0.0058724   | 1.1138849 ±0.0154554   |
| 20F24192            | 17.0 % | 0.0047325 ±0.0001701   | 0.0104340 ±0.0053813   | 0.0072828 ±0.0069656   | 0.0057140 ±0.0058724   | 1.1138849 ±0.0154554   |
| 20F24194            | 17.0 % | 0.0047154 ±0.0001569   | 0.0141410 ±0.0064471   | 0.0050197 ±0.0067074   | 0.0152762 ±0.0057786   | 1.0760924 ±0.0155802   |
| 20F24195            | 17.0 % | 0.0047154 ±0.0001569   | 0.0141410 ±0.0064471   | 0.0050197 ±0.0067074   | 0.0152762 ±0.0057786   | 1.0760924 ±0.0155802   |
| 20F24197            | 17.0 % | 0.0042621 ±0.0001545   | 0.0170323 ±0.0052701   | 0.0082646 ±0.0062515   | 0.0162429 ±0.0050709   | 1.0653615 ±0.0151573   |
| 20F24198            | 17.0 % | 0.0042621 ±0.0001545   | 0.0170323 ±0.0052701   | 0.0082646 ±0.0062515   | 0.0162429 ±0.0050709   | 1.0653615 ±0.0151573   |
| 20F24200            | 17.0 % | 0.0049814 ±0.0001538   | 0.0167270 ±0.0056931   | 0.0147786 ±0.0064946   | 0.0264942 ±0.0059645   | 1.0972295 ±0.0163941   |
| 20F24201            | 17.0 % | 0.0049814 ±0.0001538   | 0.0167270 ±0.0056931   | 0.0147786 ±0.0064946   | 0.0264942 ±0.0059645   | 1.0972295 ±0.0163941   |
| 20F24203            | 17.0 % | 0.0042621 ±0.0001545   | 0.0170323 ±0.0052701   | 0.0082646 ±0.0062515   | 0.0162429 ±0.0050709   | 1.0653615 ±0.0151573   |
| 20F24204            | 17.0 % | 0.0042621 ±0.0001545   | 0.0170323 ±0.0052701   | 0.0082646 ±0.0062515   | 0.0162429 ±0.0050709   | 1.0653615 ±0.0151573   |
| 20F24206            | 17.0 % | 0.0049814 ±0.0001538   | 0.0167270 ±0.0056931   | 0.0147786 ±0.0064946   | 0.0264942 ±0.0059645   | 1.0972295 ±0.0163941   |
| 20F24207            | 17.0 % | 0.0049814 ±0.0001538   | 0.0167270 ±0.0056931   | 0.0147786 ±0.0064946   | 0.0264942 ±0.0059645   | 1.0972295 ±0.0163941   |



| Intercept Values |        | 36Ar ± 1σ (SE) [fA] |            | r2     | Regression (type,n) | 37Ar ± 1σ (SE) [fA] |            | r2     | Regression (type,n) | 38Ar ± 1σ (SE) [fA] |            | r2     | Regression (type,n) | 39Ar ± 1σ (SE) [fA] |           | r2     | Regression (type,n) | 40Ar ± 1σ (SE) [fA] |          | r2     | Regression (type,n) |
|------------------|--------|---------------------|------------|--------|---------------------|---------------------|------------|--------|---------------------|---------------------|------------|--------|---------------------|---------------------|-----------|--------|---------------------|---------------------|----------|--------|---------------------|
| 20F24164         | 17.0 % | 0.5169099           | ±0.0010748 | 0.9516 | EXP 150 of 150      | 4.3410648           | ±0.0061405 | 0.9827 | EXP 149 of 150      | 0.5838892           | ±0.0059444 | 0.5473 | EXP 146 of 150      | 41.160433           | ±0.011360 | 0.9993 | EXP 150 of 150      | 356.87055           | ±0.02959 | 0.9999 | EXP 150 of 150      |
| 20F24165         | 17.0 % | 0.6313173           | ±0.0011498 | 0.9630 | EXP 150 of 150      | 4.1291702           | ±0.0065362 | 0.9771 | EXP 149 of 150      | 0.5777903           | ±0.0065017 | 0.4716 | EXP 150 of 150      | 37.758562           | ±0.009880 | 0.9994 | EXP 149 of 150      | 378.42971           | ±0.02885 | 0.9999 | EXP 149 of 150      |
| 20F24167         | 17.0 % | 0.3368104           | ±0.0008442 | 0.9198 | EXP 150 of 150      | 3.0964125           | ±0.0065891 | 0.9607 | EXP 150 of 150      | 0.3834916           | ±0.0071003 | 0.2469 | EXP 149 of 150      | 26.984698           | ±0.007377 | 0.9993 | EXP 148 of 150      | 236.53901           | ±0.02436 | 0.9998 | EXP 150 of 150      |
| 20F24168         | 17.0 % | 0.4263954           | ±0.0008592 | 0.9536 | EXP 150 of 150      | 3.5972595           | ±0.0069129 | 0.9669 | EXP 150 of 150      | 0.4584072           | ±0.0071881 | 0.2901 | EXP 150 of 150      | 31.220997           | ±0.009223 | 0.9992 | EXP 149 of 150      | 284.72574           | ±0.02739 | 0.9999 | EXP 149 of 150      |
| 20F24170         | 17.0 % | 0.1196161           | ±0.0005290 | 0.5580 | EXP 150 of 150      | 1.6428219           | ±0.0069437 | 0.8676 | EXP 149 of 150      | 0.1814649           | ±0.0063693 | 0.0856 | EXP 150 of 150      | 13.185670           | ±0.007335 | 0.9971 | EXP 146 of 150      | 100.35650           | ±0.02142 | 0.9989 | EXP 150 of 150      |
| 20F24171         | 17.0 % | 0.4654262           | ±0.0008580 | 0.9605 | EXP 149 of 150      | 3.4475949           | ±0.0068651 | 0.9669 | EXP 150 of 150      | 0.4624652           | ±0.0056810 | 0.4365 | EXP 148 of 150      | 30.798642           | ±0.008314 | 0.9993 | EXP 150 of 150      | 289.84346           | ±0.03025 | 0.9998 | EXP 150 of 150      |
| 20F24173         | 17.0 % | 0.3261730           | ±0.0008363 | 0.9121 | EXP 150 of 150      | 2.5107298           | ±0.0061820 | 0.9490 | EXP 150 of 150      | 0.3255168           | ±0.0071148 | 0.1325 | EXP 150 of 150      | 22.238545           | ±0.007809 | 0.9988 | EXP 149 of 150      | 206.33746           | ±0.02494 | 0.9998 | EXP 150 of 150      |
| 20F24174         | 17.0 % | 0.9337613           | ±0.0012932 | 0.9808 | EXP 150 of 150      | 4.9440792           | ±0.0067692 | 0.9834 | EXP 150 of 150      | 0.6827648           | ±0.0067319 | 0.5278 | EXP 150 of 150      | 41.653934           | ±0.010696 | 0.9994 | EXP 150 of 150      | 483.76183           | ±0.03180 | 0.9999 | EXP 148 of 150      |
| 20F24176         | 17.0 % | 0.4957992           | ±0.0010606 | 0.9505 | EXP 148 of 150      | 3.1435883           | ±0.0055367 | 0.9719 | EXP 150 of 150      | 0.4160919           | ±0.0060730 | 0.2416 | EXP 146 of 150      | 27.500531           | ±0.009447 | 0.9989 | EXP 150 of 150      | 268.00500           | ±0.02530 | 0.9999 | EXP 146 of 150      |
| 20F24177         | 17.0 % | 0.3055758           | ±0.0007582 | 0.9119 | EXP 150 of 150      | 3.4903900           | ±0.0063155 | 0.9735 | EXP 150 of 150      | 0.4084675           | ±0.0066256 | 0.2604 | EXP 150 of 150      | 29.036246           | ±0.008717 | 0.9991 | EXP 149 of 150      | 233.43145           | ±0.02321 | 0.9999 | EXP 145 of 150      |
| 20F24179         | 17.0 % | 0.7809986           | ±0.0012219 | 0.9726 | EXP 149 of 150      | 4.9325227           | ±0.0057650 | 0.9881 | EXP 150 of 150      | 0.7598766           | ±0.0059826 | 0.6486 | EXP 149 of 150      | 48.586238           | ±0.010072 | 0.9996 | EXP 150 of 150      | 480.80590           | ±0.03450 | 0.9999 | EXP 148 of 150      |
| 20F24180         | 17.0 % | 0.5267964           | ±0.0009967 | 0.9572 | EXP 150 of 150      | 3.1086618           | ±0.0061145 | 0.9669 | EXP 150 of 150      | 0.4230845           | ±0.0071022 | 0.2070 | EXP 150 of 150      | 27.552285           | ±0.007933 | 0.9992 | EXP 149 of 150      | 296.25876           | ±0.02927 | 0.9999 | EXP 149 of 150      |
| 20F24182         | 17.0 % | 0.3370551           | ±0.0008568 | 0.9119 | EXP 150 of 150      | 3.2245091           | ±0.0060188 | 0.9698 | EXP 150 of 150      | 0.4008261           | ±0.0065903 | 0.2430 | EXP 150 of 150      | 28.493613           | ±0.007997 | 0.9993 | EXP 145 of 150      | 236.77422           | ±0.02404 | 0.9998 | EXP 150 of 150      |
| 20F24183         | 17.0 % | 0.1768561           | ±0.0006709 | 0.7275 | EXP 150 of 150      | 2.7035661           | ±0.0059094 | 0.9585 | EXP 148 of 150      | 0.3091656           | ±0.0058978 | 0.3134 | EXP 148 of 150      | 21.857985           | ±0.008451 | 0.9985 | EXP 150 of 150      | 149.01997           | ±0.02143 | 0.9996 | EXP 150 of 150      |
| 20F24185         | 17.0 % | 0.6525202           | ±0.0011161 | 0.9683 | EXP 149 of 150      | 2.9831419           | ±0.0067899 | 0.9544 | EXP 149 of 150      | 0.4657786           | ±0.0066747 | 0.3824 | EXP 150 of 150      | 27.469084           | ±0.008325 | 0.9991 | EXP 150 of 150      | 333.15111           | ±0.02670 | 0.9999 | EXP 147 of 150      |
| 20F24186         | 17.0 % | 0.3340154           | ±0.0008151 | 0.9183 | EXP 148 of 150      | 2.9135514           | ±0.0059006 | 0.9650 | EXP 150 of 150      | 0.3362464           | ±0.0068288 | 0.1965 | EXP 150 of 150      | 22.638404           | ±0.009016 | 0.9984 | EXP 150 of 150      | 210.84394           | ±0.02376 | 0.9998 | EXP 150 of 150      |
| 20F24188         | 17.0 % | 0.2184487           | ±0.0007237 | 0.8152 | EXP 148 of 150      | 3.0638369           | ±0.0058164 | 0.9685 | EXP 150 of 150      | 0.3129890           | ±0.0065560 | 0.1582 | EXP 150 of 150      | 22.660824           | ±0.008613 | 0.9986 | EXP 150 of 150      | 174.42849           | ±0.02237 | 0.9997 | EXP 149 of 150      |
| 20F24189         | 17.0 % | 0.1980609           | ±0.0006661 | 0.8133 | EXP 150 of 150      | 2.2921441           | ±0.0063002 | 0.9344 | EXP 150 of 150      | 0.2619101           | ±0.0058944 | 0.1265 | EXP 147 of 150      | 18.931917           | ±0.008438 | 0.9980 | EXP 150 of 150      | 149.30129           | ±0.02386 | 0.9995 | EXP 150 of 150      |
| 20F24191         | 17.0 % | 0.3151980           | ±0.0007850 | 0.9141 | EXP 150 of 150      | 2.9643221           | ±0.0058243 | 0.9669 | EXP 150 of 150      | 0.3890106           | ±0.0059265 | 0.3120 | EXP 148 of 150      | 27.508506           | ±0.008584 | 0.9991 | EXP 149 of 150      | 228.17657           | ±0.02527 | 0.9998 | EXP 150 of 150      |
| 20F24192         | 17.0 % | 0.2243700           | ±0.0006447 | 0.8622 | EXP 150 of 150      | 1.0433199           | ±0.0057773 | 0.7931 | EXP 150 of 150      | 0.1705496           | ±0.0056338 | 0.0462 | EXP 147 of 150      | 11.076072           | ±0.007245 | 0.9958 | EXP 145 of 150      | 117.18542           | ±0.01956 | 0.9994 | EXP 150 of 150      |
| 20F24194         | 17.0 % | 0.1765700           | ±0.0006369 | 0.7771 | EXP 150 of 150      | 2.1616836           | ±0.0063265 | 0.9295 | EXP 150 of 150      | 0.2550116           | ±0.0065516 | 0.1483 | EXP 150 of 150      | 18.632036           | ±0.008993 | 0.9977 | EXP 150 of 150      | 144.82943           | ±0.02063 | 0.9996 | EXP 150 of 150      |
| 20F24195         | 17.0 % | 0.1435511           | ±0.0006158 | 0.6544 | EXP 150 of 150      | 1.6003413           | ±0.0058773 | 0.8970 | EXP 150 of 150      | 0.2176402           | ±0.0062870 | 0.0999 | EXP 150 of 150      | 16.291988           | ±0.008162 | 0.9975 | EXP 150 of 150      | 118.44838           | ±0.02138 | 0.9992 | EXP 148 of 150      |
| 20F24197         | 17.0 % | 0.2105961           | ±0.0006641 | 0.8121 | EXP 149 of 150      | 2.9406152           | ±0.0065761 | 0.9568 | EXP 150 of 150      | 0.3470868           | ±0.0052798 | 0.4044 | EXP 149 of 150      | 25.560001           | ±0.008534 | 0.9989 | EXP 150 of 150      | 187.35082           | ±0.02154 | 0.9998 | EXP 147 of 150      |
| 20F24198         | 17.0 % | 0.2779371           | ±0.0007875 | 0.8848 | EXP 150 of 150      | 2.1633770           | ±0.0055527 | 0.9429 | EXP 150 of 150      | 0.3037511           | ±0.0065159 | 0.2013 | EXP 149 of 150      | 20.776624           | ±0.008380 | 0.9984 | EXP 150 of 150      | 184.37542           | ±0.02340 | 0.9997 | EXP 150 of 150      |
| 20F24200         | 17.0 % | 0.1478806           | ±0.0005635 | 0.7120 | EXP 150 of 150      | 1.6965361           | ±0.0060554 | 0.9034 | EXP 146 of 150      | 0.1880538           | ±0.0067160 | 0.0640 | EXP 150 of 150      | 14.219878           | ±0.007646 | 0.9971 | EXP 150 of 150      | 115.39044           | ±0.01960 | 0.9994 | EXP 150 of 150      |
| 20F24201         | 17.0 % | 0.4543997           | ±0.0009131 | 0.9553 | EXP 150 of 150      | 3.6594637           | ±0.0058914 | 0.9774 | EXP 150 of 150      | 0.3405021           | ±0.0067868 | 0.1828 | EXP 148 of 150      | 21.221234           | ±0.008473 | 0.9984 | EXP 150 of 150      | 227.72631           | ±0.02523 | 0.9998 | EXP 150 of 150      |
| 20F24203         | 17.0 % | 0.2237255           | ±0.0007126 | 0.8447 | EXP 150 of 150      | 2.1541805           | ±0.0050841 | 0.9531 | EXP 150 of 150      | 0.2433506           | ±0.0074668 | 0.0574 | EXP 150 of 150      | 18.630601           | ±0.008163 | 0.9981 | EXP 150 of 150      | 159.83334           | ±0.02330 | 0.9996 | EXP 150 of 150      |
| 20F24204         | 17.0 % | 0.3475613           | ±0.0008745 | 0.9220 | EXP 150 of 150      | 3.0749090           | ±0.0053845 | 0.9741 | EXP 149 of 150      | 0.3142898           | ±0.0071071 | 0.1187 | EXP 150 of 150      | 21.638911           | ±0.008084 | 0.9986 | EXP 150 of 150      | 208.55152           | ±0.02589 | 0.9998 | EXP 149 of 150      |
| 20F24206         | 17.0 % | 0.2303528           | ±0.0006697 | 0.8745 | EXP 150 of 150      | 1.8986185           | ±0.0056197 | 0.9218 | EXP 149 of 150      | 0.2682106           | ±0.0069586 | 0.1554 | EXP 150 of 150      | 18.756772           | ±0.007540 | 0.9985 | EXP 148 of 150      | 159.12373           | ±0.01938 | 0.9997 | EXP 148 of 150      |
| 20F24207         | 17.0 % | 0.4928953           | ±0.0011789 | 0.9362 | EXP 149 of 150      | 3.3370410           | ±0.0065505 | 0.9669 | EXP 150 of 150      | 0.5100070           | ±0.0063476 | 0.4240 | EXP 150 of 150      | 34.528132           | ±0.009325 | 0.9993 | EXP 150 of 150      | 309.81100           | ±0.02547 | 0.9999 | EXP 149 of 150      |

| Project Info |        | Analyst     | Irradiation | X-pos | Y-pos | Z/H-pos | Project                | Experiment | Nmb |
|--------------|--------|-------------|-------------|-------|-------|---------|------------------------|------------|-----|
| 20F24164     | 17.0 % | Dan Miggins | 20-OSU-01   | 0.00  | 0.00  | 2.09    | Oregon\Swenton (20-01) | 20F24159   | 01  |
| 20F24165     | 17.0 % | Dan Miggins | 20-OSU-01   | 0.00  | 0.00  | 2.09    | Oregon\Swenton (20-01) | 20F24159   | 01  |
| 20F24167     | 17.0 % | Dan Miggins | 20-OSU-01   | 0.00  | 0.00  | 2.09    | Oregon\Swenton (20-01) | 20F24159   | 01  |
| 20F24168     | 17.0 % | Dan Miggins | 20-OSU-01   | 0.00  | 0.00  | 2.09    | Oregon\Swenton (20-01) | 20F24159   | 01  |
| 20F24170     | 17.0 % | Dan Miggins | 20-OSU-01   | 0.00  | 0.00  | 2.09    | Oregon\Swenton (20-01) | 20F24159   | 01  |
| 20F24171     | 17.0 % | Dan Miggins | 20-OSU-01   | 0.00  | 0.00  | 2.09    | Oregon\Swenton (20-01) | 20F24159   | 01  |
| 20F24173     | 17.0 % | Dan Miggins | 20-OSU-01   | 0.00  | 0.00  | 2.09    | Oregon\Swenton (20-01) | 20F24159   | 01  |
| 20F24174     | 17.0 % | Dan Miggins | 20-OSU-01   | 0.00  | 0.00  | 2.09    | Oregon\Swenton (20-01) | 20F24159   | 01  |
| 20F24176     | 17.0 % | Dan Miggins | 20-OSU-01   | 0.00  | 0.00  | 2.09    | Oregon\Swenton (20-01) | 20F24159   | 01  |
| 20F24177     | 17.0 % | Dan Miggins | 20-OSU-01   | 0.00  | 0.00  | 2.09    | Oregon\Swenton (20-01) | 20F24159   | 01  |
| 20F24179     | 17.0 % | Dan Miggins | 20-OSU-01   | 0.00  | 0.00  | 2.09    | Oregon\Swenton (20-01) | 20F24159   | 01  |
| 20F24180     | 17.0 % | Dan Miggins | 20-OSU-01   | 0.00  | 0.00  | 2.09    | Oregon\Swenton (20-01) | 20F24159   | 01  |
| 20F24182     | 17.0 % | Dan Miggins | 20-OSU-01   | 0.00  | 0.00  | 2.09    | Oregon\Swenton (20-01) | 20F24159   | 01  |
| 20F24183     | 17.0 % | Dan Miggins | 20-OSU-01   | 0.00  | 0.00  | 2.09    | Oregon\Swenton (20-01) | 20F24159   | 01  |
| 20F24185     | 17.0 % | Dan Miggins | 20-OSU-01   | 0.00  | 0.00  | 2.09    | Oregon\Swenton (20-01) | 20F24159   | 01  |
| 20F24186     | 17.0 % | Dan Miggins | 20-OSU-01   | 0.00  | 0.00  | 2.09    | Oregon\Swenton (20-01) | 20F24159   | 01  |
| 20F24188     | 17.0 % | Dan Miggins | 20-OSU-01   | 0.00  | 0.00  | 2.09    | Oregon\Swenton (20-01) | 20F24159   | 01  |
| 20F24189     | 17.0 % | Dan Miggins | 20-OSU-01   | 0.00  | 0.00  | 2.09    | Oregon\Swenton (20-01) | 20F24159   | 01  |
| 20F24191     | 17.0 % | Dan Miggins | 20-OSU-01   | 0.00  | 0.00  | 2.09    | Oregon\Swenton (20-01) | 20F24159   | 01  |
| 20F24192     | 17.0 % | Dan Miggins | 20-OSU-01   | 0.00  | 0.00  | 2.09    | Oregon\Swenton (20-01) | 20F24159   | 01  |
| 20F24194     | 17.0 % | Dan Miggins | 20-OSU-01   | 0.00  | 0.00  | 2.09    | Oregon\Swenton (20-01) | 20F24159   | 01  |
| 20F24195     | 17.0 % | Dan Miggins | 20-OSU-01   | 0.00  | 0.00  | 2.09    | Oregon\Swenton (20-01) | 20F24159   | 01  |
| 20F24197     | 17.0 % | Dan Miggins | 20-OSU-01   | 0.00  | 0.00  | 2.09    | Oregon\Swenton (20-01) | 20F24159   | 01  |
| 20F24198     | 17.0 % | Dan Miggins | 20-OSU-01   | 0.00  | 0.00  | 2.09    | Oregon\Swenton (20-01) | 20F24159   | 01  |
| 20F24200     | 17.0 % | Dan Miggins | 20-OSU-01   | 0.00  | 0.00  | 2.09    | Oregon\Swenton (20-01) | 20F24159   | 01  |
| 20F24201     | 17.0 % | Dan Miggins | 20-OSU-01   | 0.00  | 0.00  | 2.09    | Oregon\Swenton (20-01) | 20F24159   | 01  |
| 20F24203     | 17.0 % | Dan Miggins | 20-OSU-01   | 0.00  | 0.00  | 2.09    | Oregon\Swenton (20-01) | 20F24159   | 01  |
| 20F24204     | 17.0 % | Dan Miggins | 20-OSU-01   | 0.00  | 0.00  | 2.09    | Oregon\Swenton (20-01) | 20F24159   | 01  |
| 20F24206     | 17.0 % | Dan Miggins | 20-OSU-01   | 0.00  | 0.00  | 2.09    | Oregon\Swenton (20-01) | 20F24159   | 01  |
| 20F24207     | 17.0 % | Dan Miggins | 20-OSU-01   | 0.00  | 0.00  | 2.09    | Oregon\Swenton (20-01) | 20F24159   | 01  |

| OSU Argon Geochronology Lab<br>CEOAS Oregon State University, Corvallis, USA |        |          |             |               |                 |                  |       |                     |                    |       |            |       |               |       |           |       |              |                        |     |       |      |      |     |        |
|------------------------------------------------------------------------------|--------|----------|-------------|---------------|-----------------|------------------|-------|---------------------|--------------------|-------|------------|-------|---------------|-------|-----------|-------|--------------|------------------------|-----|-------|------|------|-----|--------|
| Sample Parameters                                                            |        | Sample   | Material    | Location      | Standard Name   | Standard (in Ma) | %1σ   | Standard Reference  | Standard 40Ar/39Ar | %1σ   | J          | %1σ   | Air 40Ar/36Ar | %1σ   | MDF (lin) | %1σ   | Volume Ratio | Sensitivity (mol/volt) | Day | Month | Year | Hour | Min | Resist |
| 20F24164                                                                     | 17.0 % | VS19-079 | Plagioclase | Rhyolite Dome | FCT-NM (1D3-20) | 28.201           | 0.082 | Kuiper et al (2008) | 9.39301            | 0.072 | 0.00165288 | 0.072 | 298.219       | 0.123 | 1.0002862 | 0.040 | 1            | 3.54E-14               | 5   | SEP   | 2020 | 20   | 17  | 1      |
| 20F24165                                                                     | 17.0 % | VS19-079 | Plagioclase | Rhyolite Dome | FCT-NM (1D3-20) | 28.201           | 0.082 | Kuiper et al (2008) | 9.39301            | 0.072 | 0.00165288 | 0.072 | 298.219       | 0.123 | 1.0002862 | 0.040 | 1            | 3.54E-14               | 5   | SEP   | 2020 | 20   | 26  | 1      |
| 20F24167                                                                     | 17.0 % | VS19-079 | Plagioclase | Rhyolite Dome | FCT-NM (1D3-20) | 28.201           | 0.082 | Kuiper et al (2008) | 9.39301            | 0.072 | 0.00165288 | 0.072 | 298.219       | 0.123 | 1.0002862 | 0.040 | 1            | 3.54E-14               | 5   | SEP   | 2020 | 20   | 43  | 1      |
| 20F24168                                                                     | 17.0 % | VS19-079 | Plagioclase | Rhyolite Dome | FCT-NM (1D3-20) | 28.201           | 0.082 | Kuiper et al (2008) | 9.39301            | 0.072 | 0.00165288 | 0.072 | 298.219       | 0.123 | 1.0002862 | 0.040 | 1            | 3.54E-14               | 5   | SEP   | 2020 | 20   | 51  | 1      |
| 20F24170                                                                     | 17.0 % | VS19-079 | Plagioclase | Rhyolite Dome | FCT-NM (1D3-20) | 28.201           | 0.082 | Kuiper et al (2008) | 9.39301            | 0.072 | 0.00165288 | 0.072 | 298.219       | 0.123 | 1.0002862 | 0.040 | 1            | 3.54E-14               | 5   | SEP   | 2020 | 21   | 8   | 1      |
| 20F24171                                                                     | 17.0 % | VS19-079 | Plagioclase | Rhyolite Dome | FCT-NM (1D3-20) | 28.201           | 0.082 | Kuiper et al (2008) | 9.39301            | 0.072 | 0.00165288 | 0.072 | 298.219       | 0.123 | 1.0002862 | 0.040 | 1            | 3.54E-14               | 5   | SEP   | 2020 | 21   | 17  | 1      |
| 20F24173                                                                     | 17.0 % | VS19-079 | Plagioclase | Rhyolite Dome | FCT-NM (1D3-20) | 28.201           | 0.082 | Kuiper et al (2008) | 9.39301            | 0.072 | 0.00165288 | 0.072 | 298.219       | 0.123 | 1.0002862 | 0.040 | 1            | 3.54E-14               | 5   | SEP   | 2020 | 21   | 34  | 1      |
| 20F24174                                                                     | 17.0 % | VS19-079 | Plagioclase | Rhyolite Dome | FCT-NM (1D3-20) | 28.201           | 0.082 | Kuiper et al (2008) | 9.39301            | 0.072 | 0.00165288 | 0.072 | 298.219       | 0.123 | 1.0002862 | 0.040 | 1            | 3.54E-14               | 5   | SEP   | 2020 | 21   | 43  | 1      |
| 20F24176                                                                     | 17.0 % | VS19-079 | Plagioclase | Rhyolite Dome | FCT-NM (1D3-20) | 28.201           | 0.082 | Kuiper et al (2008) | 9.39301            | 0.072 | 0.00165288 | 0.072 | 298.219       | 0.123 | 1.0002862 | 0.040 | 1            | 3.54E-14               | 5   | SEP   | 2020 | 22   | 0   | 1      |
| 20F24177                                                                     | 17.0 % | VS19-079 | Plagioclase | Rhyolite Dome | FCT-NM (1D3-20) | 28.201           | 0.082 | Kuiper et al (2008) | 9.39301            | 0.072 | 0.00165288 | 0.072 | 298.219       | 0.123 | 1.0002862 | 0.040 | 1            | 3.54E-14               | 5   | SEP   | 2020 | 22   | 8   | 1      |
| 20F24179                                                                     | 17.0 % | VS19-079 | Plagioclase | Rhyolite Dome | FCT-NM (1D3-20) | 28.201           | 0.082 | Kuiper et al (2008) | 9.39301            | 0.072 | 0.00165288 | 0.072 | 298.219       | 0.123 | 1.0002862 | 0.040 | 1            | 3.54E-14               | 5   | SEP   | 2020 | 22   | 26  | 1      |
| 20F24180                                                                     | 17.0 % | VS19-079 | Plagioclase | Rhyolite Dome | FCT-NM (1D3-20) | 28.201           | 0.082 | Kuiper et al (2008) | 9.39301            | 0.072 | 0.00165288 | 0.072 | 298.219       | 0.123 | 1.0002862 | 0.040 | 1            | 3.54E-14               | 5   | SEP   | 2020 | 22   | 34  | 1      |
| 20F24182                                                                     | 17.0 % | VS19-079 | Plagioclase | Rhyolite Dome | FCT-NM (1D3-20) | 28.201           | 0.082 | Kuiper et al (2008) | 9.39301            | 0.072 | 0.00165288 | 0.072 | 298.219       | 0.123 | 1.0002862 | 0.040 | 1            | 3.54E-14               | 5   | SEP   | 2020 | 22   | 51  | 1      |
| 20F24183                                                                     | 17.0 % | VS19-079 | Plagioclase | Rhyolite Dome | FCT-NM (1D3-20) | 28.201           | 0.082 | Kuiper et al (2008) | 9.39301            | 0.072 | 0.00165288 | 0.072 | 298.219       | 0.123 | 1.0002862 | 0.040 | 1            | 3.54E-14               | 5   | SEP   | 2020 | 23   | 0   | 1      |
| 20F24185                                                                     | 17.0 % | VS19-079 | Plagioclase | Rhyolite Dome | FCT-NM (1D3-20) | 28.201           | 0.082 | Kuiper et al (2008) | 9.39301            | 0.072 | 0.00165288 | 0.072 | 298.219       | 0.123 | 1.0002862 | 0.040 | 1            | 3.54E-14               | 5   | SEP   | 2020 | 23   | 17  | 1      |
| 20F24186                                                                     | 17.0 % | VS19-079 | Plagioclase | Rhyolite Dome | FCT-NM (1D3-20) | 28.201           | 0.082 | Kuiper et al (2008) | 9.39301            | 0.072 | 0.00165288 | 0.072 | 298.219       | 0.123 | 1.0002862 | 0.040 | 1            | 3.54E-14               | 5   | SEP   | 2020 | 23   | 26  | 1      |
| 20F24188                                                                     | 17.0 % | VS19-079 | Plagioclase | Rhyolite Dome | FCT-NM (1D3-20) | 28.201           | 0.082 | Kuiper et al (2008) | 9.39301            | 0.072 | 0.00165288 | 0.072 | 298.219       | 0.123 | 1.0002862 | 0.040 | 1            | 3.54E-14               | 5   | SEP   | 2020 | 23   | 43  | 1      |
| 20F24189                                                                     | 17.0 % | VS19-079 | Plagioclase | Rhyolite Dome | FCT-NM (1D3-20) | 28.201           | 0.082 | Kuiper et al (2008) | 9.39301            | 0.072 | 0.00165288 | 0.072 | 298.219       | 0.123 | 1.0002862 | 0.040 | 1            | 3.54E-14               | 5   | SEP   | 2020 | 23   | 52  | 1      |
| 20F24191                                                                     | 17.0 % | VS19-079 | Plagioclase | Rhyolite Dome | FCT-NM (1D3-20) | 28.201           | 0.082 | Kuiper et al (2008) | 9.39301            | 0.072 | 0.00165288 | 0.072 | 298.219       | 0.123 | 1.0002862 | 0.040 | 1            | 3.54E-14               | 6   | SEP   | 2020 | 0    | 9   | 1      |
| 20F24192                                                                     | 17.0 % | VS19-079 | Plagioclase | Rhyolite Dome | FCT-NM (1D3-20) | 28.201           | 0.082 | Kuiper et al (2008) | 9.39301            | 0.072 | 0.00165288 | 0.072 | 298.219       | 0.123 | 1.0002862 | 0.040 | 1            | 3.54E-14               | 6   | SEP   | 2020 | 0    | 17  | 1      |
| 20F24194                                                                     | 17.0 % | VS19-079 | Plagioclase | Rhyolite Dome | FCT-NM (1D3-20) | 28.201           | 0.082 | Kuiper et al (2008) | 9.39301            | 0.072 | 0.00165288 | 0.072 | 298.219       | 0.123 | 1.0002862 | 0.040 | 1            | 3.54E-14               | 6   | SEP   | 2020 | 0    | 34  | 1      |
| 20F24195                                                                     | 17.0 % | VS19-079 | Plagioclase | Rhyolite Dome | FCT-NM (1D3-20) | 28.201           | 0.082 | Kuiper et al (2008) | 9.39301            | 0.072 | 0.00165288 | 0.072 | 298.219       | 0.123 | 1.0002862 | 0.040 | 1            | 3.54E-14               | 6   | SEP   | 2020 | 0    | 43  | 1      |
| 20F24197                                                                     | 17.0 % | VS19-079 | Plagioclase | Rhyolite Dome | FCT-NM (1D3-20) | 28.201           | 0.082 | Kuiper et al (2008) | 9.39301            | 0.072 | 0.00165288 | 0.072 | 298.219       | 0.123 | 1.0002862 | 0.040 | 1            | 3.54E-14               | 6   | SEP   | 2020 | 1    | 0   | 1      |
| 20F24198                                                                     | 17.0 % | VS19-079 | Plagioclase | Rhyolite Dome | FCT-NM (1D3-20) | 28.201           | 0.082 | Kuiper et al (2008) | 9.39301            | 0.072 | 0.00165288 | 0.072 | 298.219       | 0.123 | 1.0002862 | 0.040 | 1            | 3.54E-14               | 6   | SEP   | 2020 | 1    | 9   | 1      |
| 20F24200                                                                     | 17.0 % | VS19-079 | Plagioclase | Rhyolite Dome | FCT-NM (1D3-20) | 28.201           | 0.082 | Kuiper et al (2008) | 9.39301            | 0.072 | 0.00165288 | 0.072 | 298.219       | 0.123 | 1.0002862 | 0.040 | 1            | 3.54E-14               | 6   | SEP   | 2020 | 1    | 26  | 1      |
| 20F24201                                                                     | 17.0 % | VS19-079 | Plagioclase | Rhyolite Dome | FCT-NM (1D3-20) | 28.201           | 0.082 | Kuiper et al (2008) | 9.39301            | 0.072 | 0.00165288 | 0.072 | 298.219       | 0.123 | 1.0002862 | 0.040 | 1            | 3.54E-14               | 6   | SEP   | 2020 | 1    | 35  | 1      |
| 20F24203                                                                     | 17.0 % | VS19-079 | Plagioclase | Rhyolite Dome | FCT-NM (1D3-20) | 28.201           | 0.082 | Kuiper et al (2008) | 9.39301            | 0.072 | 0.00165288 | 0.072 | 298.219       | 0.123 | 1.0002862 | 0.040 | 1            | 3.54E-14               | 6   | SEP   | 2020 | 1    | 52  | 1      |
| 20F24204                                                                     | 17.0 % | VS19-079 | Plagioclase | Rhyolite Dome | FCT-NM (1D3-20) | 28.201           | 0.082 | Kuiper et al (2008) | 9.39301            | 0.072 | 0.00165288 | 0.072 | 298.219       | 0.123 | 1.0002862 | 0.040 | 1            | 3.54E-14               | 6   | SEP   | 2020 | 2    | 0   | 1      |
| 20F24206                                                                     | 17.0 % | VS19-079 | Plagioclase | Rhyolite Dome | FCT-NM (1D3-20) | 28.201           | 0.082 | Kuiper et al (2008) | 9.39301            | 0.072 | 0.00165288 | 0.072 | 298.219       | 0.123 | 1.0002862 | 0.040 | 1            | 3.54E-14               | 6   | SEP   | 2020 | 2    | 18  | 1      |
| 20F24207                                                                     | 17.0 % | VS19-079 | Plagioclase | Rhyolite Dome | FCT-NM (1D3-20) | 28.201           | 0.082 | Kuiper et al (2008) | 9.39301            | 0.072 | 0.00165288 | 0.072 | 298.219       | 0.123 | 1.0002862 | 0.040 | 1            | 3.54E-14               | 6   | SEP   | 2020 | 2    | 26  | 1      |



20F24159.AGE >>> VS19-079 >>> OREGON | SWENTON (20-01) PROJECT

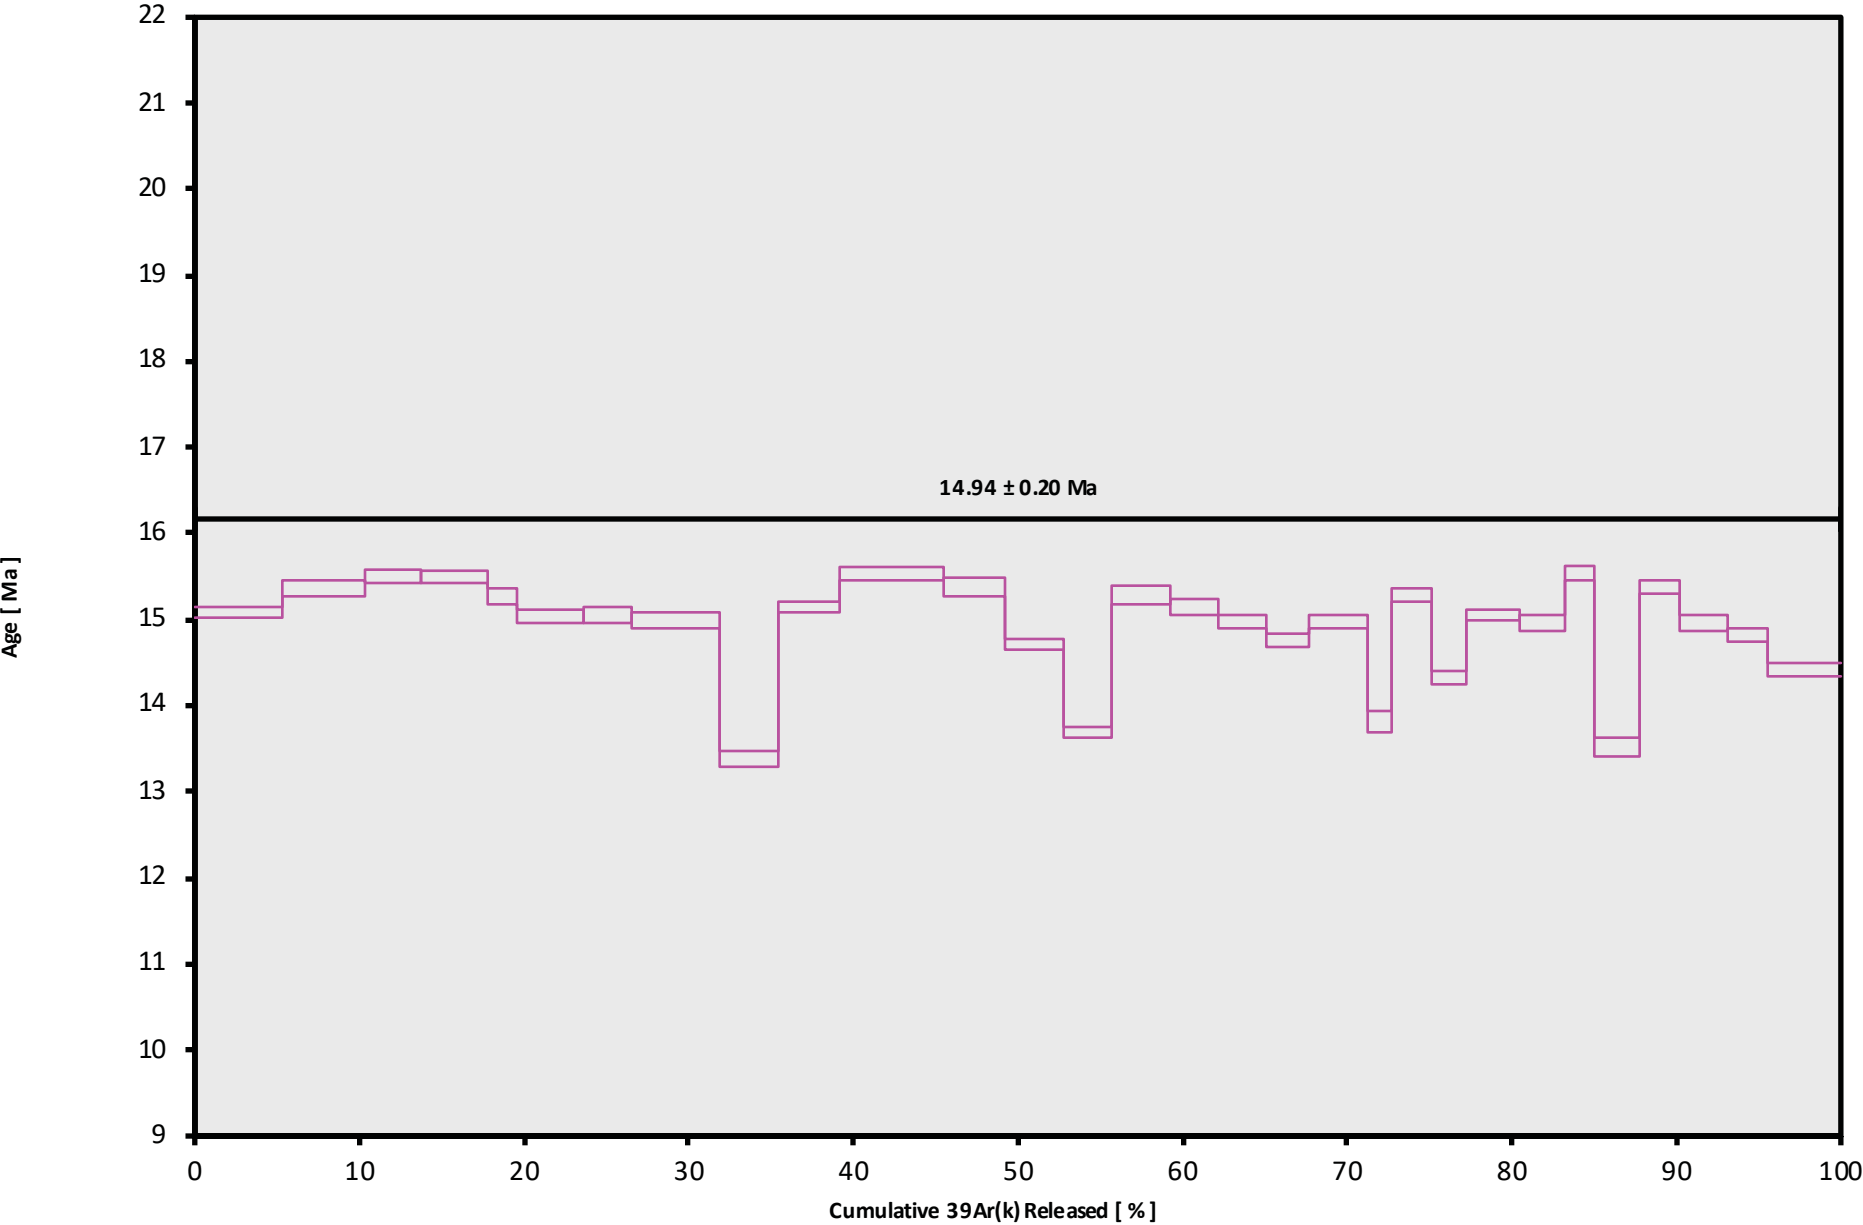

Ar-Ages in Ma

**WEIGHTED PLATEAU**  
**14.94 ± 0.20**  
**TOTAL FUSION**  
**14.94 ± 0.03**  
**NORMAL ISOCHRON**  
**14.58 ± 0.73**  
**INVERSE ISOCHRON**  
**14.73 ± 0.67**

**MSWD (PROBABILITY)**  
**> 100 (0%)**

Sample Info

**Plagioclase**  
**Rhyolite Dome**  
**Dan Miggins**

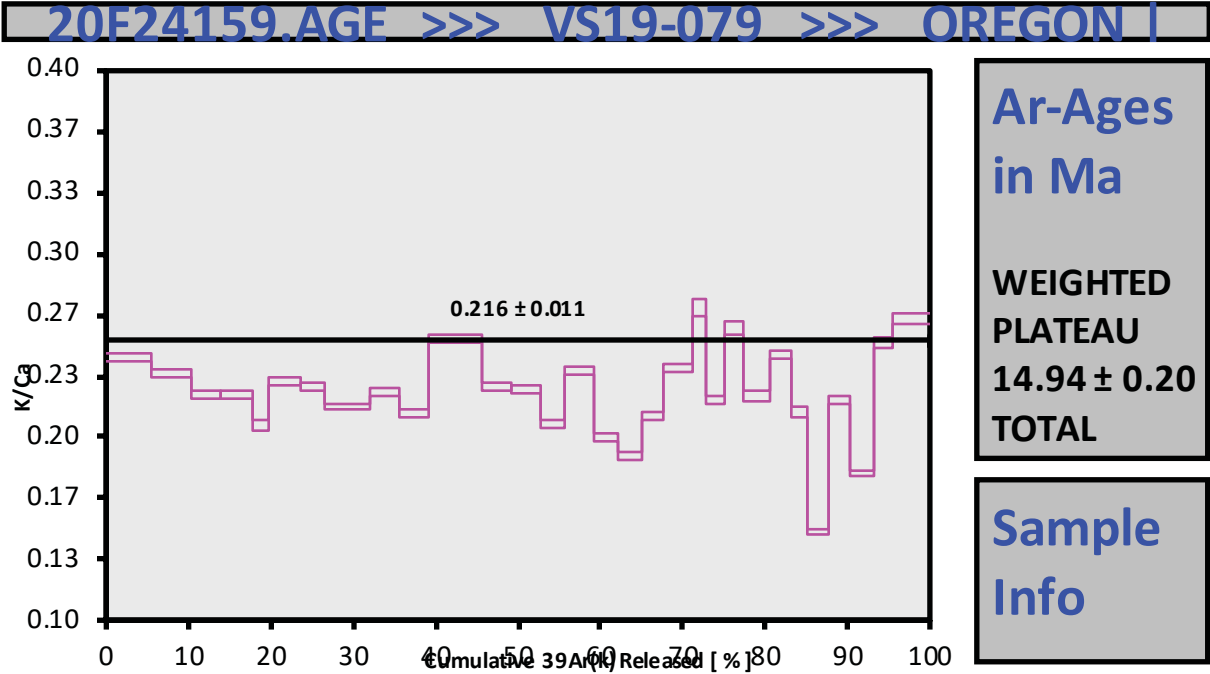

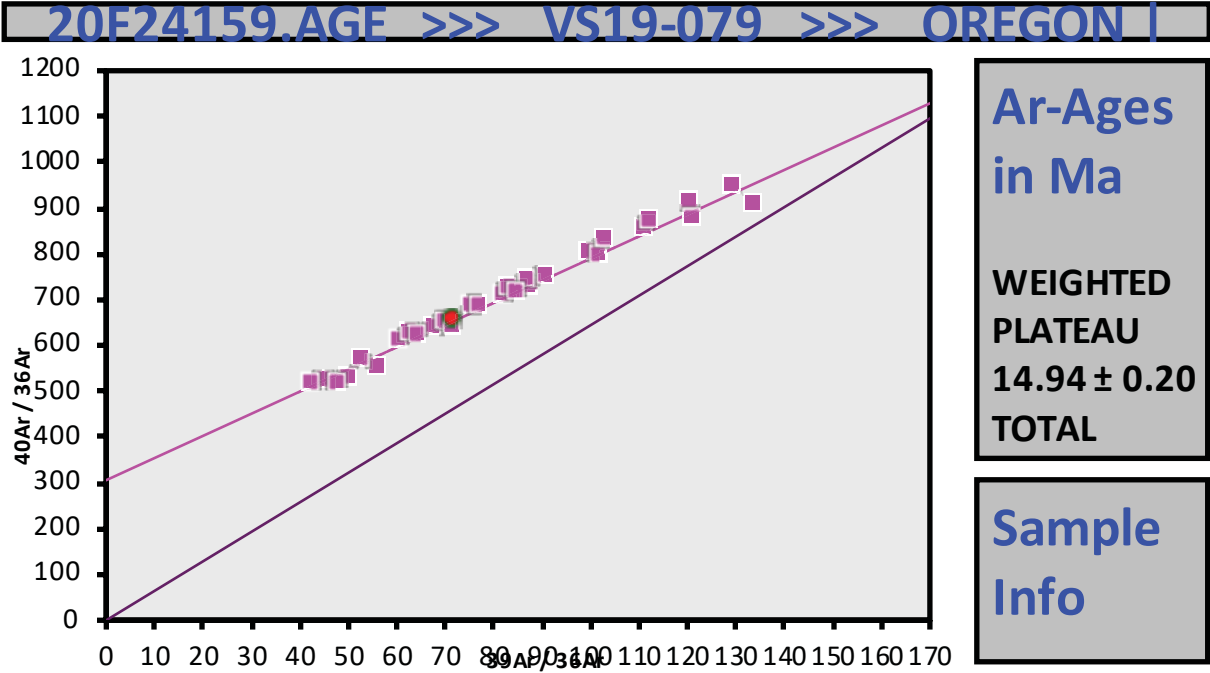

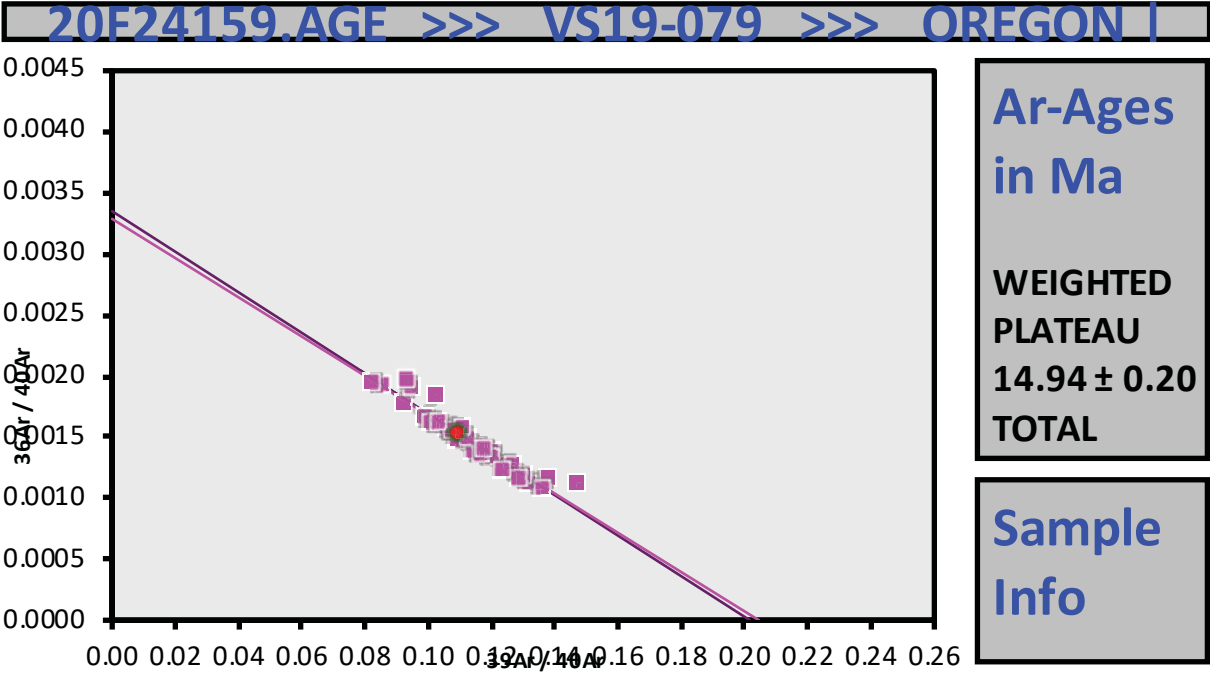



| Relative Abundances |        | 36Ar<br>[fA] | %1σ   | 37Ar<br>[fA] | %1σ     | 38Ar<br>[fA] | %1σ   | 39Ar<br>[fA] | %1σ   | 40Ar<br>[fA] | %1σ   | 40(r)/39(k) ± 2σ | Age ± 2σ<br>(Ma) | 40Ar(r)<br>(%) | 39Ar(k)<br>(%) | K/Ca ± 2σ  |
|---------------------|--------|--------------|-------|--------------|---------|--------------|-------|--------------|-------|--------------|-------|------------------|------------------|----------------|----------------|------------|
| 20F25072            | 0.3 %  | 0.3884801    | 0.284 | 0.354894     | 54.174  | 0.327433     | 2.770 | 16.7499      | 0.080 | 131.104      | 0.130 | 0.12585 ±0.17172 | 0.37 ±0.51       | 1.61           | 0.57           | 20.3 ±22.0 |
| 20F25074            | 0.4 %  | 0.2936740    | 0.318 | 0.177134     | 108.335 | 0.298318     | 2.968 | 14.9794      | 0.091 | 101.144      | 0.168 | 0.24174 ±0.14713 | 0.72 ±0.44       | 3.58           | 0.51           | 36.4 ±78.8 |
| 20F25075            | 0.5 %  | 0.1369406    | 0.512 | 0.515605     | 38.441  | 0.173723     | 4.877 | 9.0525       | 0.133 | 48.675       | 0.349 | 0.35772 ±0.12494 | 1.06 ±0.37       | 6.65           | 0.31           | 7.5 ±5.8   |
| 20F25077            | 0.6 %  | 0.2982775    | 0.330 | 0.459885     | 42.985  | 0.398241     | 2.291 | 21.3619      | 0.069 | 108.477      | 0.157 | 0.44232 ±0.10504 | 1.32 ±0.31       | 8.71           | 0.73           | 20.0 ±17.2 |
| 20F25078            | 0.7 %  | 0.2950622    | 0.342 | 0.920480     | 20.812  | 0.532512     | 1.662 | 29.7705      | 0.057 | 120.121      | 0.142 | 0.74570 ±0.07478 | 2.22 ±0.22       | 18.48          | 1.02           | 13.9 ±5.8  |
| 20F25080            | 0.9 %  | 0.1898588    | 0.428 | 0.795093     | 24.743  | 0.439674     | 1.939 | 23.9436      | 0.063 | 85.686       | 0.198 | 0.94793 ±0.06229 | 2.82 ±0.19       | 26.49          | 0.82           | 12.9 ±6.4  |
| 20F25081            | 1.1 %  | 0.1046630    | 0.622 | 0.557269     | 35.027  | 0.287729     | 3.232 | 15.6624      | 0.084 | 54.660       | 0.311 | 1.27356 ±0.05910 | 3.78 ±0.18       | 36.49          | 0.54           | 12.1 ±8.5  |
| 20F25083            | 1.3 %  | 0.1301807    | 0.530 | 0.702365     | 27.677  | 0.382122     | 2.471 | 21.8098      | 0.070 | 76.253       | 0.223 | 1.51658 ±0.04986 | 4.51 ±0.15       | 43.38          | 0.75           | 13.4 ±7.4  |
| 20F25084            | 1.5 %  | 0.2629129    | 0.338 | 1.699553     | 11.354  | 0.882949     | 1.053 | 50.3617      | 0.047 | 187.889      | 0.091 | 1.99981 ±0.03948 | 5.94 ±0.12       | 53.60          | 1.72           | 12.7 ±2.9  |
| 20F25086            | 1.8 %  | 0.3417432    | 0.315 | 2.114513     | 9.498   | 1.133984     | 0.813 | 68.8027      | 0.044 | 305.206      | 0.056 | 2.78882 ±0.03716 | 8.28 ±0.11       | 62.87          | 2.35           | 14.0 ±2.7  |
| 20F25087            | 2.2 %  | 0.1964820    | 0.429 | 1.896073     | 10.366  | 1.041319     | 0.876 | 67.3339      | 0.045 | 303.517      | 0.056 | 3.54073 ±0.02309 | 10.50 ±0.07      | 78.55          | 2.30           | 15.3 ±3.2  |
| 20F25089            | 2.6 %  | 0.1798910    | 0.459 | 2.565991     | 7.727   | 1.372997     | 0.690 | 96.6408      | 0.042 | 481.793      | 0.036 | 4.36918 ±0.01524 | 12.95 ±0.05      | 87.64          | 3.30           | 16.2 ±2.5  |
| 20F25090            | 3.1 %  | 0.1623180    | 0.469 | 3.936814     | 4.807   | 2.073110     | 0.425 | 162.4022     | 0.041 | 907.531      | 0.019 | 5.25792 ±0.00908 | 15.57 ±0.03      | 94.09          | 5.55           | 17.7 ±1.7  |
| 20F25091            | 3.6 %  | 0.1199571    | 0.598 | 3.948812     | 5.016   | 2.229134     | 0.427 | 187.6309     | 0.040 | 1113.461     | 0.016 | 5.72334 ±0.00718 | 16.94 ±0.02      | 96.44          | 6.41           | 20.4 ±2.0  |
| 20F25093            | 4.1 %  | 0.1095997    | 0.613 | 4.426290     | 4.339   | 2.455658     | 0.371 | 214.4801     | 0.040 | 1303.429     | 0.014 | 5.90876 ±0.00652 | 17.49 ±0.02      | 97.23          | 7.33           | 20.8 ±1.8  |
| 20F25094            | 4.7 %  | 0.0660188    | 0.905 | 4.305171     | 4.366   | 2.380309     | 0.384 | 211.4433     | 0.040 | 1278.686     | 0.014 | 5.94502 ±0.00582 | 17.60 ±0.02      | 98.31          | 7.23           | 21.1 ±1.8  |
| 20F25095            | 5.3 %  | 0.0676174    | 0.833 | 4.990607     | 3.966   | 2.746968     | 0.349 | 243.0247     | 0.040 | 1465.681     | 0.012 | 5.93991 ±0.00555 | 17.58 ±0.02      | 98.49          | 8.31           | 20.9 ±1.7  |
| 20F25097            | 6.0 %  | 0.0634653    | 0.915 | 5.180419     | 3.662   | 2.863608     | 0.353 | 254.5061     | 0.040 | 1525.015     | 0.012 | 5.91053 ±0.00542 | 17.50 ±0.02      | 98.64          | 8.70           | 21.1 ±1.5  |
| 20F25098            | 6.8 %  | 0.0609635    | 0.958 | 4.330158     | 4.272   | 2.457870     | 0.374 | 219.6937     | 0.040 | 1305.288     | 0.014 | 5.85047 ±0.00560 | 17.32 ±0.02      | 98.47          | 7.51           | 21.8 ±1.9  |
| 20F25099            | 7.5 %  | 0.0553059    | 1.091 | 4.136538     | 4.712   | 2.181093     | 0.446 | 189.7211     | 0.040 | 1118.243     | 0.016 | 5.79876 ±0.00581 | 17.17 ±0.02      | 98.38          | 6.49           | 19.7 ±0.9  |
| 20F25101            | 8.3 %  | 0.0552521    | 1.055 | 3.902040     | 5.117   | 1.913802     | 0.488 | 168.4332     | 0.041 | 986.541      | 0.018 | 5.74977 ±0.00605 | 17.02 ±0.02      | 98.17          | 5.76           | 18.6 ±1.9  |
| 20F25102            | 9.1 %  | 0.0540198    | 1.056 | 2.822501     | 6.399   | 1.486626     | 0.616 | 127.8434     | 0.041 | 746.699      | 0.023 | 5.70185 ±0.00685 | 16.88 ±0.02      | 97.62          | 4.37           | 19.5 ±2.5  |
| 20F25103            | 10.1 % | ✓ 0.0739636  | 0.857 | 2.251149     | 8.427   | 1.316939     | 0.733 | 111.8169     | 0.042 | 658.987      | 0.026 | 5.67504 ±0.00825 | 16.80 ±0.02      | 96.29          | 3.82           | 21.4 ±3.6  |
| 20F25105            | 11.2 % | ✓ 0.0746026  | 0.776 | 1.879675     | 10.095  | 1.073414     | 0.825 | 92.2263      | 0.043 | 548.202      | 0.032 | 5.67674 ±0.00937 | 16.81 ±0.03      | 95.50          | 3.15           | 21.1 ±4.3  |
| 20F25106            | 12.4 % | ✓ 0.0929584  | 0.674 | 1.640676     | 11.710  | 0.859126     | 1.078 | 72.5945      | 0.044 | 442.312      | 0.039 | 5.66913 ±0.01273 | 16.79 ±0.04      | 93.04          | 2.48           | 19.0 ±4.5  |
| 20F25107            | 13.6 % | ✓ 0.1133745  | 0.625 | 1.280314     | 15.261  | 0.672215     | 1.367 | 57.4488      | 0.046 | 363.599      | 0.047 | 5.67513 ±0.01804 | 16.80 ±0.05      | 89.67          | 1.96           | 19.3 ±5.9  |
| 20F25109            | 14.9 % | ✓ 0.1282800  | 0.531 | 1.038424     | 18.070  | 0.555731     | 1.670 | 45.5925      | 0.048 | 302.164      | 0.057 | 5.69455 ±0.02417 | 16.86 ±0.07      | 85.92          | 1.56           | 18.9 ±6.8  |
| 20F25110            | 16.2 % | ✓ 0.1353440  | 0.513 | 0.579414     | 31.461  | 0.433156     | 2.201 | 36.3231      | 0.052 | 252.193      | 0.068 | 5.70641 ±0.03139 | 16.90 ±0.09      | 82.19          | 1.24           | 27.0 ±17.0 |
| 20F25111            | 17.6 % | ✓ 0.1410021  | 0.534 | 0.696171     | 27.479  | 0.359770     | 2.494 | 29.6730      | 0.057 | 215.806      | 0.079 | 5.69620 ±0.03998 | 16.86 ±0.12      | 78.32          | 1.01           | 18.3 ±10.1 |
| 20F25113            | 19.0 % | ✓ 0.1413271  | 0.509 | 0.528756     | 35.845  | 0.309941     | 2.805 | 24.3281      | 0.063 | 185.075      | 0.092 | 5.67954 ±0.04835 | 16.82 ±0.14      | 74.66          | 0.83           | 19.8 ±14.2 |
| 20F25114            | 20.5 % | ✓ 0.1343343  | 0.554 | 0.498771     | 37.806  | 0.253850     | 3.567 | 20.5350      | 0.070 | 161.786      | 0.105 | 5.70760 ±0.05549 | 16.90 ±0.16      | 72.44          | 0.70           | 17.7 ±13.4 |
| 20F25116            | 22.3 % | ✓ 0.1331552  | 0.514 | 0.466162     | 40.565  | 0.252250     | 3.477 | 18.7800      | 0.075 | 151.393      | 0.113 | 5.70826 ±0.05941 | 16.90 ±0.18      | 70.81          | 0.64           | 17.3 ±14.1 |
| Σ                   |        | 4.8010255    | 0.089 | 65.597718    | 1.660   | 36.145570    | 0.144 | 2924.9663    | 0.010 | 17036.615    | 0.006 |                  |                  |                |                |            |

| Information on Analysis and Constants Used in Calculations |  |
|------------------------------------------------------------|--|
| Project = <b>SWENTON (20-01)</b>                           |  |
| Sample = <b>VS19-080</b>                                   |  |
| Material = <b>Groundmass</b>                               |  |
| Location = <b>Rhyolite Dome</b>                            |  |
| Region = <b>Eastern Oregon</b>                             |  |
| Analyst = <b>Dan Miggins</b>                               |  |
| Irradiation = <b>20-OSU-01 (1C34-20)</b>                   |  |
| Position = <b>X: 0   Y: 0   Z/H: 42.99641 mm</b>           |  |
| FCT-NM Age = <b>28.201 ±0.023 Ma</b>                       |  |
| FCT-NM Reference = <b>Kuiper et al (2008)</b>              |  |
| FCT-NM 40Ar/39Ar Ratio = <b>9.55461 ±0.01481</b>           |  |
| FCT-NM J-value = <b>0.00162492 ±0.00000252</b>             |  |
| Air Shot 40Ar/36Ar = <b>298.2690 ±0.3460</b>               |  |
| Air Shot MDF = <b>1.00024422 ±0.00039037 (LIN)</b>         |  |
| Experiment Type = <b>Incremental Heating</b>               |  |
| Extraction Method = <b>Single Crystal Laser Heating</b>    |  |
| Heating = <b>62 sec</b>                                    |  |
| Isolation = <b>6.12 min</b>                                |  |
| Instrument = <b>ARGUS-VI-F</b>                             |  |
| Preferred Age = <b>Mini Plateau</b>                        |  |
| Age Classification = <b>Eruption Age</b>                   |  |
| IGSN = <b>Undefined</b>                                    |  |
| Rock Class = <b>Undefined</b>                              |  |
| Lithology = <b>Undefined</b>                               |  |
| Lat-Lon = <b>Undefined - Undefined</b>                     |  |

| Results          | 40(a)/36(a) ± 2σ                                | 40(r)/39(k) ± 2σ           | Age ± 2σ<br>(Ma)                                                                     | MSWD           | 39Ar(k)<br>(%,n)                                                                  | K/Ca ± 2σ                                  |
|------------------|-------------------------------------------------|----------------------------|--------------------------------------------------------------------------------------|----------------|-----------------------------------------------------------------------------------|--------------------------------------------|
| Age Plateau      |                                                 | 5.67714 ±0.00546<br>±0.10% | <b>16.81 ±0.05<br/>±0.32%</b><br>Full External Error ±0.87<br>Analytical Error ±0.02 | 1.19<br>30%    | 17.41<br>10                                                                       | 20.2 ±2.0                                  |
| Total Fusion Age |                                                 | 5.28094 ±0.00285<br>±0.05% | <b>15.64 ±0.05<br/>±0.31%</b><br>Full External Error ±0.81<br>Analytical Error ±0.01 | 1.94<br>1.0892 | 2σ Confidence Limit<br>Error Magnification                                        |                                            |
| Normal Isochron  | <b>337.20 ±3.20<br/>±0.95%</b>                  | 5.67107 ±0.00701<br>±0.12% | <b>16.79 ±0.06<br/>±0.33%</b><br>Full External Error ±0.87<br>Analytical Error ±0.02 | 1.64<br>11%    | 17.41<br>10                                                                       | 2σ Confidence Limit<br>Error Magnification |
| Inverse Isochron | <b>337.58 ±3.18<br/>±0.94%</b>                  | 5.67009 ±0.00698<br>±0.12% | <b>16.79 ±0.06<br/>±0.33%</b><br>Full External Error ±0.87<br>Analytical Error ±0.02 | 1.2807<br>1    | 2σ Confidence Limit<br>Error Magnification<br>Number of Iterations<br>Convergence |                                            |
| Notes            | Excess Initial 40Ar/36Ar = 332.12 ± 1.07 (%SD). |                            |                                                                                      |                |                                                                                   |                                            |
|                  |                                                 |                            |                                                                                      | 0.0000072996   | 3<br>26%                                                                          |                                            |

| Incremental Heating |        | 36Ar(a)<br>[fA] | 37Ar(ca)<br>[fA] | 38Ar(cl)<br>[fA] | 39Ar(k)<br>[fA] | 40Ar(r)<br>[fA] | Age ± 2σ<br>(Ma) | 40Ar(r)<br>(%) | 39Ar(k)<br>(%) | K/Ca ± 2σ  |
|---------------------|--------|-----------------|------------------|------------------|-----------------|-----------------|------------------|----------------|----------------|------------|
| 20F25072            | 0.3 %  | 0.3883708       | 0.354894         | 0.0518756        | 16.7497         | 2.108           | 0.37 ±0.51       | 1.61           | 0.57           | 20.3 ±22.0 |
| 20F25074            | 0.4 %  | 0.2936101       | 0.177134         | 0.0620355        | 14.9793         | 3.621           | 0.72 ±0.44       | 3.58           | 0.51           | 36.4 ±78.8 |
| 20F25075            | 0.5 %  | 0.1367913       | 0.515605         | 0.0385213        | 9.0522          | 3.238           | 1.06 ±0.37       | 6.65           | 0.31           | 7.5 ±5.8   |
| 20F25077            | 0.6 %  | 0.2981315       | 0.459885         | 0.0839757        | 21.3616         | 9.449           | 1.32 ±0.31       | 8.71           | 0.73           | 20.0 ±17.2 |
| 20F25078            | 0.7 %  | 0.2947831       | 0.920480         | 0.1172483        | 29.7700         | 22.200          | 2.22 ±0.22       | 18.48          | 1.02           | 13.9 ±5.8  |
| 20F25080            | 0.9 %  | 0.1896143       | 0.795093         | 0.1146287        | 23.9431         | 22.696          | 2.82 ±0.19       | 26.49          | 0.82           | 12.9 ±6.4  |
| 20F25081            | 1.1 %  | 0.1044921       | 0.557269         | 0.0787815        | 15.6621         | 19.947          | 3.78 ±0.18       | 36.49          | 0.54           | 12.1 ±8.5  |
| 20F25083            | 1.3 %  | 0.1299666       | 0.702365         | 0.0941047        | 21.8094         | 33.076          | 4.51 ±0.15       | 43.38          | 0.75           | 13.4 ±7.4  |
| 20F25084            | 1.5 %  | 0.2623954       | 1.699553         | 0.2249759        | 50.3606         | 100.712         | 5.94 ±0.12       | 53.60          | 1.72           | 12.7 ±2.9  |
| 20F25086            | 1.8 %  | 0.3411101       | 2.114513         | 0.2383905        | 68.8013         | 191.875         | 8.28 ±0.11       | 62.87          | 2.35           | 14.0 ±2.7  |
| 20F25087            | 2.2 %  | 0.1959202       | 1.896073         | 0.1908693        | 67.3327         | 238.407         | 10.50 ±0.07      | 78.55          | 2.30           | 15.3 ±3.2  |
| 20F25089            | 2.6 %  | 0.1791531       | 2.565991         | 0.1716530        | 96.6392         | 422.234         | 12.95 ±0.05      | 87.64          | 3.30           | 16.2 ±2.5  |
| 20F25090            | 3.1 %  | 0.1612330       | 3.936814         | 0.0807078        | 162.3997        | 853.884         | 15.57 ±0.03      | 94.09          | 5.55           | 17.7 ±1.7  |
| 20F25091            | 3.6 %  | 0.1188897       | 3.948812         | 0.0000000        | 187.6284        | 1073.861        | 16.94 ±0.02      | 96.44          | 6.41           | 20.4 ±2.0  |
| 20F25093            | 4.1 %  | 0.1084032       | 4.426290         | 0.0000000        | 214.4773        | 1267.295        | 17.49 ±0.02      | 97.23          | 7.33           | 20.8 ±1.8  |
| 20F25094            | 4.7 %  | 0.0648551       | 4.305171         | 0.0000000        | 211.4405        | 1257.018        | 17.60 ±0.02      | 98.31          | 7.23           | 21.1 ±1.8  |
| 20F25095            | 5.3 %  | 0.0662684       | 4.990607         | 0.0000000        | 243.0215        | 1443.525        | 17.58 ±0.02      | 98.49          | 8.31           | 20.9 ±1.7  |
| 20F25097            | 6.0 %  | 0.0620650       | 5.180419         | 0.0000000        | 254.5028        | 1504.247        | 17.50 ±0.02      | 98.64          | 8.70           | 21.1 ±1.5  |
| 20F25098            | 6.8 %  | 0.0597930       | 4.330158         | 0.0000000        | 219.6910        | 1285.296        | 17.32 ±0.02      | 98.47          | 7.51           | 21.8 ±1.9  |
| 20F25099            | 7.5 %  | 0.0541878       | 4.136538         | 0.0000000        | 189.7184        | 1100.131        | 17.17 ±0.02      | 98.38          | 6.49           | 19.7 ±1.9  |
| 20F25101            | 8.3 %  | 0.0541974       | 3.902040         | 0.0000000        | 168.4307        | 968.439         | 17.02 ±0.02      | 98.17          | 5.76           | 18.6 ±1.9  |
| 20F25102            | 9.1 %  | 0.0532569       | 2.822501         | 0.0000000        | 127.8416        | 728.934         | 16.88 ±0.02      | 97.62          | 4.37           | 19.5 ±2.5  |
| 20F25103            | 10.1 % | ✓ 0.0733551     | 2.251149         | 0.0000000        | 111.8154        | 634.557         | 16.80 ±0.02      | 96.29          | 3.82           | 21.4 ±3.6  |
| 20F25105            | 11.2 % | ✓ 0.0740945     | 1.879675         | 0.0000000        | 92.2251         | 523.538         | 16.81 ±0.03      | 95.50          | 3.15           | 21.1 ±4.3  |
| 20F25106            | 12.4 % | ✓ 0.0925149     | 1.640676         | 0.0000000        | 72.5934         | 411.542         | 16.79 ±0.04      | 93.04          | 2.48           | 19.0 ±4.5  |
| 20F25107            | 13.6 % | ✓ 0.1130284     | 1.280314         | 0.0000000        | 57.4480         | 326.025         | 16.80 ±0.05      | 89.67          | 1.96           | 19.3 ±5.9  |
| 20F25109            | 14.9 % | ✓ 0.1279993     | 1.038424         | 0.0000000        | 45.5919         | 259.625         | 16.86 ±0.07      | 85.92          | 1.56           | 18.9 ±6.8  |
| 20F25110            | 16.2 % | ✓ 0.1351874     | 0.579414         | 0.0000000        | 36.3228         | 207.273         | 16.90 ±0.09      | 82.19          | 1.24           | 27.0 ±17.0 |
| 20F25111            | 17.6 % | ✓ 0.1408139     | 0.696171         | 0.0000000        | 29.6725         | 169.021         | 16.86 ±0.12      | 78.32          | 1.01           | 18.3 ±10.1 |
| 20F25113            | 19.0 % | ✓ 0.1411842     | 0.528756         | 0.0000000        | 24.3277         | 138.170         | 16.82 ±0.14      | 74.66          | 0.83           | 19.8 ±14.2 |
| 20F25114            | 20.5 % | ✓ 0.1341995     | 0.498771         | 0.0000000        | 20.5347         | 117.204         | 16.90 ±0.16      | 72.44          | 0.70           | 17.7 ±13.4 |
| 20F25116            | 22.3 % | ✓ 0.1330291     | 0.466162         | 0.0002872        | 18.7797         | 107.200         | 16.90 ±0.18      | 70.81          | 0.64           | 17.3 ±14.1 |

Σ 4.7828946 65.597718 1.5480552 2924.9241 15446.345

| Information on Analysis                                                                                                                                                                                                                                   | Results          | 40(r)/39(k) ± 2σ        | Age ± 2σ<br>(Ma)                                                            | MSWD                          | 39Ar(k)<br>(%,n)                                          | K/Ca ± 2σ  |
|-----------------------------------------------------------------------------------------------------------------------------------------------------------------------------------------------------------------------------------------------------------|------------------|-------------------------|-----------------------------------------------------------------------------|-------------------------------|-----------------------------------------------------------|------------|
| Project = SWENTON (20-01)<br>Sample = VS19-080<br>Material = Groundmass<br>Location = Rhyolite Dome<br>Region = Eastern Oregon<br>Analyst = Dan Miggins<br>Irradiation = 20-OSU-01 (1C34-20)<br>J = 0.00162492 ± 0.00000252<br>FCT-NM = 28.201 ± 0.023 Ma | Age Plateau      | 5.67714 ±0.00546 ±0.10% | 16.81 ±0.05 ±0.32%<br>Full External Error ± 0.87<br>Analytical Error ± 0.02 | 1.19<br>30%<br>1.94<br>1.0892 | 17.41<br>10<br>2σ Confidence Limit<br>Error Magnification | 20.2 ± 2.0 |
|                                                                                                                                                                                                                                                           | Total Fusion Age | 5.28094 ±0.00285 ±0.05% | 15.64 ±0.05 ±0.31%<br>Full External Error ± 0.81<br>Analytical Error ± 0.01 |                               | 32                                                        | 19.2 ± 0.6 |

| Normal Isochron |        | 39(k)/36(a) ± 2σ |                | 40(a+r)/36(a) ± 2σ | r.i.   |
|-----------------|--------|------------------|----------------|--------------------|--------|
| 20F25072        | 0.3 %  |                  | 43.13 ±0.25    | 337.55 ±2.11       | 0.8753 |
| 20F25074        | 0.4 %  |                  | 51.02 ±0.34    | 344.45 ±2.48       | 0.8503 |
| 20F25075        | 0.5 %  |                  | 66.18 ±0.70    | 355.79 ±4.42       | 0.8011 |
| 20F25077        | 0.6 %  |                  | 71.65 ±0.48    | 363.81 ±2.66       | 0.8845 |
| 20F25078        | 0.7 %  |                  | 100.99 ±0.70   | 407.43 ±3.02       | 0.9113 |
| 20F25080        | 0.9 %  |                  | 126.27 ±1.10   | 451.82 ±4.27       | 0.8981 |
| 20F25081        | 1.1 %  |                  | 149.89 ±1.89   | 523.01 ±7.31       | 0.8871 |
| 20F25083        | 1.3 %  |                  | 167.81 ±1.80   | 586.61 ±6.77       | 0.9142 |
| 20F25084        | 1.5 %  |                  | 191.93 ±1.31   | 715.94 ±5.03       | 0.9568 |
| 20F25086        | 1.8 %  |                  | 201.70 ±1.29   | 894.62 ±5.74       | 0.9750 |
| 20F25087        | 2.2 %  |                  | 343.67 ±2.98   | 1548.98 ±13.47     | 0.9863 |
| 20F25089        | 2.6 %  |                  | 539.42 ±5.01   | 2688.95 ±24.92     | 0.9929 |
| 20F25090        | 3.1 %  |                  | 1007.24 ±9.57  | 5628.08 ±53.33     | 0.9955 |
| 20F25091        | 3.6 %  |                  | 1578.17 ±19.13 | 9364.53 ±113.28    | 0.9975 |
| 20F25093        | 4.1 %  |                  | 1978.51 ±24.64 | 12022.69 ±149.44   | 0.9977 |
| 20F25094        | 4.7 %  |                  | 3260.20 ±60.31 | 19714.05 ±364.38   | 0.9989 |
| 20F25095        | 5.3 %  |                  | 3667.23 ±62.66 | 22115.12 ±377.50   | 0.9988 |
| 20F25097        | 6.0 %  |                  | 4100.58 ±77.10 | 24568.75 ±461.54   | 0.9990 |
| 20F25098        | 6.8 %  |                  | 3674.19 ±72.11 | 21827.87 ±428.09   | 0.9991 |
| 20F25099        | 7.5 %  |                  | 3501.13 ±78.34 | 20634.32 ±461.43   | 0.9993 |
| 20F25101        | 8.3 %  |                  | 3107.73 ±67.20 | 18200.86 ±393.32   | 0.9992 |
| 20F25102        | 9.1 %  |                  | 2400.47 ±51.67 | 14019.24 ±301.62   | 0.9990 |
| 20F25103        | 10.1 % | ✓                | 1524.30 ±26.45 | 8982.59 ±155.78    | 0.9984 |
| 20F25105        | 11.2 % | ✓                | 1244.70 ±19.55 | 7397.93 ±116.15    | 0.9977 |
| 20F25106        | 12.4 % | ✓                | 784.67 ±10.68  | 4780.50 ±65.04     | 0.9963 |
| 20F25107        | 13.6 % | ✓                | 508.26 ±6.40   | 3216.57 ±40.54     | 0.9946 |
| 20F25109        | 14.9 % | ✓                | 356.19 ±3.82   | 2360.45 ±25.35     | 0.9903 |
| 20F25110        | 16.2 % | ✓                | 268.68 ±2.78   | 1865.34 ±19.37     | 0.9865 |
| 20F25111        | 17.6 % | ✓                | 210.72 ±2.27   | 1532.43 ±16.60     | 0.9836 |
| 20F25113        | 19.0 % | ✓                | 172.31 ±1.77   | 1310.77 ±13.61     | 0.9766 |
| 20F25114        | 20.5 % | ✓                | 153.02 ±1.72   | 1205.47 ±13.65     | 0.9750 |
| 20F25116        | 22.3 % | ✓                | 141.17 ±1.47   | 1137.96 ±12.02     | 0.9667 |

| Results         | 40(a)/36(a) ± 2σ      |        | 40(r)/39(k) ± 2σ        | Age ± 2σ (Ma)             | MSWD |
|-----------------|-----------------------|--------|-------------------------|---------------------------|------|
| Normal Isochron | 337.20 ±3.20 ±0.95%   |        | 5.67107 ±0.00701 ±0.12% | 16.79 ±0.06 ±0.33%        | 1.64 |
|                 |                       |        |                         | Full External Error ±0.87 | 11%  |
|                 |                       |        |                         | Analytical Error ±0.02    |      |
| <hr/>           |                       |        |                         |                           |      |
| Statistics      | 2σ Confidence Limit   | 2.00   | Convergence             | 0.000007299635            |      |
|                 | Error Magnification   | 1.2807 | Number of Iterations    | 1                         |      |
|                 | Number of Data Points | 10     | Calculated Line         | Weighted York-2           |      |

| Inverse Isochron |        | 39(k)/40(a+r) ± 2σ |                      | 36(a)/40(a+r) ± 2σ     |  | r.i.   |
|------------------|--------|--------------------|----------------------|------------------------|--|--------|
| 20F25072         | 0.3 %  |                    | 0.1277687 ±0.0003902 | 0.00296255 ±0.00001852 |  | 0.3542 |
| 20F25074         | 0.4 %  |                    | 0.1481122 ±0.0005671 | 0.00290315 ±0.00002094 |  | 0.4103 |
| 20F25075         | 0.5 %  |                    | 0.1859944 ±0.0013893 | 0.00281063 ±0.00003494 |  | 0.5246 |
| 20F25077         | 0.6 %  |                    | 0.1969464 ±0.0006752 | 0.00274866 ±0.00002013 |  | 0.3933 |
| 20F25078         | 0.7 %  |                    | 0.2478703 ±0.0007583 | 0.00245442 ±0.00001821 |  | 0.3556 |
| 20F25080         | 0.9 %  |                    | 0.2794766 ±0.0011635 | 0.00221328 ±0.00002093 |  | 0.4002 |
| 20F25081         | 1.1 %  |                    | 0.2865859 ±0.0018495 | 0.00191200 ±0.00002671 |  | 0.4303 |
| 20F25083         | 1.3 %  |                    | 0.2860613 ±0.0013389 | 0.00170470 ±0.00001967 |  | 0.3692 |
| 20F25084         | 1.5 %  |                    | 0.2680772 ±0.0005488 | 0.00139677 ±0.00000981 |  | 0.2299 |
| 20F25086         | 1.8 %  |                    | 0.2254568 ±0.0003226 | 0.00111779 ±0.00000718 |  | 0.1371 |
| 20F25087         | 2.2 %  |                    | 0.2218714 ±0.0003191 | 0.00064559 ±0.00000561 |  | 0.1019 |
| 20F25089         | 2.6 %  |                    | 0.2006067 ±0.0002223 | 0.00037189 ±0.00000345 |  | 0.0499 |
| 20F25090         | 3.1 %  |                    | 0.1789661 ±0.0001611 | 0.00017768 ±0.00000168 |  | 0.0176 |
| 20F25091         | 3.6 %  |                    | 0.1685265 ±0.0001458 | 0.00010679 ±0.00000129 |  | 0.0095 |
| 20F25093         | 4.1 %  |                    | 0.1645650 ±0.0001397 | 0.00008318 ±0.00000103 |  | 0.0072 |
| 20F25094         | 4.7 %  |                    | 0.1653743 ±0.0001404 | 0.00005073 ±0.00000094 |  | 0.0049 |
| 20F25095         | 5.3 %  |                    | 0.1658246 ±0.0001385 | 0.00004522 ±0.00000077 |  | 0.0041 |
| 20F25097         | 6.0 %  |                    | 0.1669024 ±0.0001383 | 0.00004070 ±0.00000076 |  | 0.0035 |
| 20F25098         | 6.8 %  |                    | 0.1683256 ±0.0001420 | 0.00004581 ±0.00000090 |  | 0.0045 |
| 20F25099         | 7.5 %  |                    | 0.1696751 ±0.0001463 | 0.00004846 ±0.00000108 |  | 0.0052 |
| 20F25101         | 8.3 %  |                    | 0.1707463 ±0.0001512 | 0.00005494 ±0.00000119 |  | 0.0065 |
| 20F25102         | 9.1 %  |                    | 0.1712268 ±0.0001614 | 0.00007133 ±0.00000153 |  | 0.0107 |
| 20F25103         | 10.1 % | ✓                  | 0.1696952 ±0.0001672 | 0.00011133 ±0.00000193 |  | 0.0162 |
| 20F25105         | 11.2 % | ✓                  | 0.1682491 ±0.0001787 | 0.00013517 ±0.00000212 |  | 0.0240 |
| 20F25106         | 12.4 % | ✓                  | 0.1641391 ±0.0001917 | 0.00020918 ±0.00000285 |  | 0.0380 |
| 20F25107         | 13.6 % | ✓                  | 0.1580134 ±0.0002073 | 0.00031089 ±0.00000392 |  | 0.0540 |
| 20F25109         | 14.9 % | ✓                  | 0.1508983 ±0.0002250 | 0.00042365 ±0.00000455 |  | 0.0805 |
| 20F25110         | 16.2 % | ✓                  | 0.1440402 ±0.0002458 | 0.00053609 ±0.00000557 |  | 0.1042 |
| 20F25111         | 17.6 % | ✓                  | 0.1375078 ±0.0002691 | 0.00065256 ±0.00000707 |  | 0.1183 |
| 20F25113         | 19.0 % | ✓                  | 0.1314584 ±0.0002941 | 0.00076291 ±0.00000792 |  | 0.1470 |
| 20F25114         | 20.5 % | ✓                  | 0.1269343 ±0.0003204 | 0.00082955 ±0.00000939 |  | 0.1553 |
| 20F25116         | 22.3 % | ✓                  | 0.1240560 ±0.0003366 | 0.00087877 ±0.00000929 |  | 0.1776 |

| Results          | 40(a)/36(a) ± 2σ      |                           | 40(r)/39(k) ± 2σ |                        | Age ± 2σ (Ma)        | MSWD  |                 |
|------------------|-----------------------|---------------------------|------------------|------------------------|----------------------|-------|-----------------|
| Inverse Isochron | 337.58                | ±3.18                     | 5.67009          | ±0.00698               | 16.79                | ±0.06 | 1.62            |
|                  |                       | ±0.94%                    |                  | ±0.12%                 | ±0.33%               | 11%   |                 |
|                  |                       | Full External Error ±0.87 |                  |                        |                      |       |                 |
|                  |                       |                           |                  | Analytical Error ±0.02 |                      |       |                 |
| <hr/>            |                       |                           |                  |                        |                      |       |                 |
| Statistics       | 2σ Confidence Limit   |                           | 2.00             |                        | Convergence          |       | 0.0002202229    |
|                  | Error Magnification   |                           | 1.2726           |                        | Number of Iterations |       | 3               |
|                  | Number of Data Points |                           | 10               |                        | Calculated Line      |       | Weighted York-2 |
|                  | Spreading Factor      |                           | 25.9%            |                        |                      |       |                 |

| Degassing Patterns |        | 36Ar(a)<br>[fA] | %1σ  | 36Ar(c)<br>[fA] | %1σ  | 36Ar(ca)<br>[fA] | %1σ    | 36Ar(cl)<br>[fA] | %1σ   | 37Ar(ca)<br>[fA] | %1σ    | 38Ar(a)<br>[fA] | %1σ  | 38Ar(c)<br>[fA] | %1σ  | 38Ar(k)<br>[fA] | %1σ  | 38Ar(ca)<br>[fA] | %1σ    | 38Ar(cl)<br>[fA] | %1σ   | 39Ar(k)<br>[fA] | %1σ  | 39Ar(ca)<br>[fA] | %1σ    | 40Ar(r)<br>[fA] | %1σ   | 40Ar(a)<br>[fA] | %1σ  | 40Ar(c)<br>[fA] | %1σ  | 40Ar(k)<br>[fA] | %1σ  |
|--------------------|--------|-----------------|------|-----------------|------|------------------|--------|------------------|-------|------------------|--------|-----------------|------|-----------------|------|-----------------|------|------------------|--------|------------------|-------|-----------------|------|------------------|--------|-----------------|-------|-----------------|------|-----------------|------|-----------------|------|
| 20F25072           | 0.3 %  | 0.3883708       | 0.28 | 0.0000000       | 0.00 | 0.0000959        | 54.17  | 0.0000134        | 17.56 | 0.354894         | 54.17  | 0.0732079       | 0.33 | 0.0000000       | 0.00 | 0.202286        | 0.12 | 0.0000639        | 55.02  | 0.0518756        | 17.58 | 16.7497         | 0.08 | 0.0002280        | 54.18  | 2.108           | 68.23 | 128.9857        | 1.11 | 0.0000000       | 0.00 | 0.0101670       | 9.65 |
| 20F25074           | 0.4 %  | 0.2936101       | 0.32 | 0.0000000       | 0.00 | 0.0000479        | 108.34 | 0.0000160        | 14.34 | 0.177134         | 108.34 | 0.0553455       | 0.36 | 0.0000000       | 0.00 | 0.180905        | 0.13 | 0.0000319        | 108.76 | 0.0620355        | 14.37 | 14.9793         | 0.09 | 0.0001138        | 108.34 | 3.621           | 30.43 | 97.5138         | 1.12 | 0.0000000       | 0.00 | 0.0090924       | 9.65 |
| 20F25075           | 0.5 %  | 0.1367913       | 0.51 | 0.0000000       | 0.00 | 0.0001394        | 38.44  | 0.0000099        | 22.04 | 0.515605         | 38.44  | 0.0257852       | 0.54 | 0.0000000       | 0.00 | 0.109324        | 0.16 | 0.0000928        | 39.63  | 0.0385213        | 22.06 | 9.0522          | 0.13 | 0.0003313        | 38.45  | 3.238           | 17.46 | 45.4311         | 1.19 | 0.0000000       | 0.00 | 0.0054947       | 9.65 |
| 20F25077           | 0.6 %  | 0.2981315       | 0.33 | 0.0000000       | 0.00 | 0.0001243        | 42.99  | 0.0000217        | 10.95 | 0.459885         | 42.99  | 0.0561978       | 0.37 | 0.0000000       | 0.00 | 0.257984        | 0.11 | 0.0000828        | 44.05  | 0.0839757        | 10.99 | 21.3616         | 0.07 | 0.0002955        | 43.00  | 9.449           | 11.87 | 99.0154         | 1.12 | 0.0000000       | 0.00 | 0.0129665       | 9.65 |
| 20F25078           | 0.7 %  | 0.2947831       | 0.34 | 0.0000000       | 0.00 | 0.0002488        | 20.81  | 0.0000303        | 7.67  | 0.920480         | 20.81  | 0.0555666       | 0.38 | 0.0000000       | 0.00 | 0.359532        | 0.11 | 0.0001657        | 22.93  | 0.1172483        | 7.72  | 29.7700         | 0.06 | 0.0005914        | 20.83  | 22.200          | 5.01  | 97.9034         | 1.12 | 0.0000000       | 0.00 | 0.0180704       | 9.65 |
| 20F25080           | 0.9 %  | 0.1896143       | 0.43 | 0.0000000       | 0.00 | 0.0002149        | 24.74  | 0.0000296        | 7.54  | 0.795093         | 24.74  | 0.0357423       | 0.46 | 0.0000000       | 0.00 | 0.289160        | 0.11 | 0.0001431        | 26.55  | 0.1146287        | 7.59  | 23.9431         | 0.06 | 0.0005108        | 24.76  | 22.696          | 3.29  | 62.9747         | 1.15 | 0.0000000       | 0.00 | 0.0145334       | 9.65 |
| 20F25081           | 1.1 %  | 0.1044921       | 0.63 | 0.0000000       | 0.00 | 0.0001506        | 35.03  | 0.0000203        | 11.87 | 0.557269         | 35.03  | 0.0196968       | 0.65 | 0.0000000       | 0.00 | 0.189151        | 0.12 | 0.0001003        | 36.33  | 0.0787815        | 11.90 | 15.6621         | 0.08 | 0.0003580        | 35.04  | 19.947          | 2.32  | 34.7039         | 1.24 | 0.0000000       | 0.00 | 0.0095069       | 9.65 |
| 20F25083           | 1.3 %  | 0.1299666       | 0.53 | 0.0000000       | 0.00 | 0.0001898        | 27.68  | 0.0000243        | 10.12 | 0.702365         | 27.68  | 0.0244987       | 0.56 | 0.0000000       | 0.00 | 0.263392        | 0.11 | 0.0001264        | 29.30  | 0.0941047        | 10.16 | 21.8094         | 0.07 | 0.0004513        | 27.69  | 33.076          | 1.64  | 43.1645         | 1.19 | 0.0000000       | 0.00 | 0.0132383       | 9.65 |
| 20F25084           | 1.5 %  | 0.2623954       | 0.34 | 0.0000000       | 0.00 | 0.0004594        | 11.36  | 0.0000581        | 4.31  | 1.699553         | 11.35  | 0.0494615       | 0.37 | 0.0000000       | 0.00 | 0.608205        | 0.10 | 0.0003059        | 14.89  | 0.2249759        | 4.41  | 50.3606         | 0.05 | 0.0010920        | 11.39  | 100.712         | 0.99  | 87.1468         | 1.12 | 0.0000000       | 0.00 | 0.0305689       | 9.65 |
| 20F25086           | 1.8 %  | 0.3411101       | 0.32 | 0.0000000       | 0.00 | 0.0005716        | 9.50   | 0.0000616        | 4.10  | 2.114513         | 9.50   | 0.0642993       | 0.35 | 0.0000000       | 0.00 | 0.830914        | 0.10 | 0.0003806        | 13.53  | 0.2383905        | 4.20  | 68.8013         | 0.04 | 0.0013586        | 9.54   | 191.875         | 0.66  | 113.2895        | 1.12 | 0.0000000       | 0.00 | 0.0417624       | 9.65 |
| 20F25087           | 2.2 %  | 0.1959202       | 0.43 | 0.0000000       | 0.00 | 0.0005125        | 10.37  | 0.0000493        | 5.01  | 1.896073         | 10.37  | 0.0369310       | 0.46 | 0.0000000       | 0.00 | 0.813177        | 0.10 | 0.0003413        | 14.15  | 0.1908693        | 5.10  | 67.3327         | 0.04 | 0.0012182        | 10.41  | 238.407         | 0.32  | 65.0690         | 1.15 | 0.0000000       | 0.00 | 0.0408709       | 9.65 |
| 20F25089           | 2.6 %  | 0.1791531       | 0.46 | 0.0000000       | 0.00 | 0.0006936        | 7.73   | 0.0000443        | 5.88  | 2.565991         | 7.73   | 0.0337704       | 0.49 | 0.0000000       | 0.00 | 1.167112        | 0.10 | 0.0004619        | 12.35  | 0.1716530        | 5.95  | 96.6392         | 0.04 | 0.0016486        | 7.78   | 422.234         | 0.17  | 59.5003         | 1.17 | 0.0000000       | 0.00 | 0.0586600       | 9.65 |
| 20F25090           | 3.1 %  | 0.1612330       | 0.47 | 0.0000000       | 0.00 | 0.0010641        | 4.81   | 0.0000208        | 12.56 | 3.936814         | 4.81   | 0.0303924       | 0.50 | 0.0000000       | 0.00 | 1.961301        | 0.10 | 0.0007086        | 10.76  | 0.0807078        | 12.59 | 162.3997        | 0.04 | 0.0025294        | 4.89   | 853.884         | 0.08  | 53.5487         | 1.17 | 0.0000000       | 0.00 | 0.0985766       | 9.65 |
| 20F25091           | 3.6 %  | 0.1188897       | 0.60 | 0.0000000       | 0.00 | 0.0010674        | 5.02   | 0.0000000        | 0.00  | 3.948812         | 5.02   | 0.0224107       | 0.63 | 0.0000000       | 0.00 | 2.265988        | 0.10 | 0.0007108        | 10.86  | 0.0000000        | 0.00  | 187.6284        | 0.04 | 0.0025371        | 5.10   | 1073.861        | 0.05  | 39.4857         | 1.23 | 0.0000000       | 0.00 | 0.1138904       | 9.65 |
| 20F25093           | 4.1 %  | 0.1084032       | 0.62 | 0.0000000       | 0.00 | 0.0011964        | 4.34   | 0.0000000        | 0.00  | 4.426290         | 4.34   | 0.0204340       | 0.64 | 0.0000000       | 0.00 | 2.590242        | 0.10 | 0.0007967        | 10.56  | 0.0000000        | 0.00  | 214.4773        | 0.04 | 0.0028439        | 4.44   | 1267.295        | 0.04  | 36.0029         | 1.24 | 0.0000000       | 0.00 | 0.1301877       | 9.65 |
| 20F25094           | 4.7 %  | 0.0648551       | 0.92 | 0.0000000       | 0.00 | 0.0011637        | 4.37   | 0.0000000        | 0.00  | 4.305171         | 4.37   | 0.0122252       | 0.94 | 0.0000000       | 0.00 | 2.553567        | 0.10 | 0.0007749        | 10.57  | 0.0000000        | 0.00  | 211.4405        | 0.04 | 0.0027661        | 4.46   | 1257.018        | 0.03  | 21.5397         | 1.41 | 0.0000000       | 0.00 | 0.1283444       | 9.65 |
| 20F25095           | 5.3 %  | 0.0662684       | 0.85 | 0.0000000       | 0.00 | 0.0013490        | 3.97   | 0.0000000        | 0.00  | 4.990607         | 3.97   | 0.0124916       | 0.87 | 0.0000000       | 0.00 | 2.934971        | 0.10 | 0.0008983        | 10.41  | 0.0000000        | 0.00  | 243.0215        | 0.04 | 0.0032065        | 4.07   | 1443.525        | 0.02  | 22.0091         | 1.37 | 0.0000000       | 0.00 | 0.1475141       | 9.65 |
| 20F25097           | 6.0 %  | 0.0620650       | 0.94 | 0.0000000       | 0.00 | 0.0014003        | 3.67   | 0.0000000        | 0.00  | 5.180419         | 3.66   | 0.0116993       | 0.95 | 0.0000000       | 0.00 | 3.073630        | 0.10 | 0.0009325        | 10.30  | 0.0000000        | 0.00  | 254.5028        | 0.04 | 0.0033284        | 3.78   | 1504.247        | 0.02  | 20.6130         | 1.42 | 0.0000000       | 0.00 | 0.1544832       | 9.65 |
| 20F25098           | 6.8 %  | 0.0597930       | 0.98 | 0.0000000       | 0.00 | 0.0011704        | 4.28   | 0.0000000        | 0.00  | 4.330158         | 4.27   | 0.0112710       | 0.99 | 0.0000000       | 0.00 | 2.653208        | 0.10 | 0.0007794        | 10.54  | 0.0000000        | 0.00  | 219.6910        | 0.04 | 0.0027821        | 4.37   | 1285.296        | 0.03  | 19.8585         | 1.45 | 0.0000000       | 0.00 | 0.1333524       | 9.65 |
| 20F25099           | 7.5 %  | 0.0541878       | 1.12 | 0.0000000       | 0.00 | 0.0011181        | 4.72   | 0.0000000        | 0.00  | 4.136538         | 4.71   | 0.0102144       | 1.13 | 0.0000000       | 0.00 | 2.291230        | 0.10 | 0.0007446        | 10.72  | 0.0000000        | 0.00  | 189.7184        | 0.04 | 0.0026577        | 4.80   | 1100.131        | 0.03  | 17.9968         | 1.55 | 0.0000000       | 0.00 | 0.1151591       | 9.65 |
| 20F25101           | 8.3 %  | 0.0541974       | 1.08 | 0.0000000       | 0.00 | 0.0010547        | 5.12   | 0.0000000        | 0.00  | 3.902040         | 5.12   | 0.0102162       | 1.09 | 0.0000000       | 0.00 | 2.034138        | 0.10 | 0.0007024        | 10.90  | 0.0000000        | 0.00  | 168.4307        | 0.04 | 0.0025071        | 5.20   | 968.439         | 0.03  | 18.0000         | 1.52 | 0.0000000       | 0.00 | 0.1022374       | 9.65 |
| 20F25102           | 9.1 %  | 0.0532569       | 1.08 | 0.0000000       | 0.00 | 0.0007629        | 6.40   | 0.0000000        | 0.00  | 2.822501         | 6.40   | 0.0100389       | 1.09 | 0.0000000       | 0.00 | 1.543943        | 0.10 | 0.0005081        | 11.56  | 0.0000000        | 0.00  | 127.8416        | 0.04 | 0.0018135        | 6.47   | 728.934         | 0.04  | 17.6877         | 1.52 | 0.0000000       | 0.00 | 0.0775998       | 9.65 |
| 20F25103           | 10.1 % | ✓ 0.0733551     | 0.87 | 0.0000000       | 0.00 | 0.0006085        | 8.43   | 0.0000000        | 0.00  | 2.251149         | 8.43   | 0.0138274       | 0.88 | 0.0000000       | 0.00 | 1.350395        | 0.10 | 0.0004052        | 12.80  | 0.0000000        | 0.00  | 111.8154        | 0.04 | 0.0014464        | 8.48   | 634.557         | 0.06  | 24.3627         | 1.38 | 0.0000000       | 0.00 | 0.0678720       | 9.65 |
| 20F25105           | 11.2 % | ✓ 0.0740945     | 0.78 | 0.0000000       | 0.00 | 0.0005081        | 10.10  | 0.0000000        | 0.00  | 1.879675         | 10.10  | 0.0139668       | 0.80 | 0.0000000       | 0.00 | 1.113802        | 0.10 | 0.0003383        | 13.95  | 0.0000000        | 0.00  | 92.2251         | 0.04 | 0.0012077        | 10.14  | 523.538         | 0.07  | 24.6083         | 1.33 | 0.0000000       | 0.00 | 0.0559806       | 9.65 |
| 20F25106           | 12.4 % | ✓ 0.0925149     | 0.68 | 0.0000000       | 0.00 | 0.0004435        | 11.71  | 0.0000000        | 0.00  | 1.640676         | 11.71  | 0.0174391       | 0.70 | 0.0000000       | 0.00 | 0.876711        | 0.10 | 0.0002953        | 15.16  | 0.0000000        | 0.00  | 72.5934         | 0.04 | 0.0010541        | 11.75  | 411.542         | 0.10  | 30.7261         | 1.27 | 0.0000000       | 0.00 | 0.0440642       | 9.65 |
| 20F25107           | 13.6 % | ✓ 0.1130284     | 0.63 | 0.0000000       | 0.00 | 0.0003461        | 15.26  | 0.0000000        | 0.00  | 1.280314         | 15.26  | 0.0213059       | 0.65 | 0.0000000       | 0.00 | 0.693799        | 0.10 | 0.0002305        | 18.05  | 0.0000000        | 0.00  | 57.4480         | 0.05 | 0.0008226        | 15.29  | 326.025         | 0.15  | 37.5390         | 1.24 | 0.0000000       | 0.00 | 0.0348709       | 9.65 |
| 20F25109           | 14.9 % | ✓ 0.1279993     | 0.53 | 0.0000000       | 0.00 | 0.0002807        | 18.07  | 0.0000000        | 0.00  | 1.038424         | 18.07  | 0.0241279       | 0.56 | 0.0000000       | 0.00 | 0.550613        | 0.10 | 0.0001869        | 20.48  | 0.0000000        | 0.00  | 45.5919         | 0.05 | 0.0006672        | 18.09  | 259.625         | 0.21  | 42.5111         | 1.20 | 0.0000000       | 0.00 | 0.0276743       | 9.65 |
| 20F25110           | 16.2 % | ✓ 0.1351874     | 0.51 | 0.0000000       | 0.00 | 0.0001566        | 31.46  | 0.0000000        | 0.00  | 0.579414         | 31.46  | 0.0254828       | 0.54 | 0.0000000       | 0.00 | 0.438670        | 0.10 | 0.0001043        | 32.90  | 0.0000000        | 0.00  | 36.3228         | 0.05 | 0.0003723        | 31.47  | 207.273         | 0.27  | 44.8984         | 1.19 | 0.0000000       | 0.00 | 0.0220479       | 9.65 |
| 20F25111           | 17.6 % | ✓ 0.1408139     | 0.54 | 0.0000000       | 0.00 | 0.0001882        | 27.48  | 0.0000000        | 0.00  | 0.696171         | 27.48  | 0.0265434       | 0.56 | 0.0000000       | 0.00 | 0.358355        | 0.11 | 0.0001253        | 29.12  | 0.0000000        | 0.00  | 29.6725         | 0.06 | 0.0004473        | 27.49  | 169.021         | 0.35  | 46.7671         | 1.20 | 0.0000000       | 0.00 | 0.0180112       | 9.65 |
| 20F25113           | 19.0 % | ✓ 0.1411842     | 0.51 | 0.0000000       | 0.00 | 0.0001429        | 35.85  | 0.0000000        | 0.00  | 0.528756         | 35.85  | 0.0266132       | 0.54 | 0.0000000       | 0.00 | 0.293806        | 0.11 | 0.0000952        | 37.12  | 0.0000000        | 0.00  | 24.3277         | 0.06 | 0.0003397        | 35.86  | 138.170         | 0.42  | 46.8901         | 1.19 | 0.0000000       | 0.00 | 0.0147669       | 9.65 |
| 20F25114           | 20.5 % | ✓ 0.1341995     | 0.56 | 0.0000000       | 0.00 | 0.0001348        | 37.81  | 0.0000000        | 0.00  | 0.498771         | 37.81  | 0.0252966       | 0.58 | 0.0000000       | 0.00 | 0.247997        | 0.1  |                  |        |                  |       |                 |      |                  |        |                 |       |                 |      |                 |      |                 |      |

| Additional Parameters |        |   | 40Ar/39Ar | 1σ       | 37Ar/39Ar | 1σ       | 36Ar/39Ar | 1σ       | Time (days) | 37Ar (decay) | 39Ar (decay) | 40Ar (moles) |
|-----------------------|--------|---|-----------|----------|-----------|----------|-----------|----------|-------------|--------------|--------------|--------------|
| 20F25072              | 0.3 %  |   | 7.827142  | 0.011950 | 0.021188  | 0.011478 | 0.023193  | 0.000068 | 158.915     | 23.135051    | 1.00112281   | 4.641E-12    |
| 20F25074              | 0.4 %  |   | 6.752193  | 0.012925 | 0.011825  | 0.012811 | 0.019605  | 0.000065 | 158.933     | 23.143303    | 1.00112294   | 3.580E-12    |
| 20F25075              | 0.5 %  |   | 5.376916  | 0.020080 | 0.056957  | 0.021895 | 0.015127  | 0.000080 | 158.942     | 23.147431    | 1.00112300   | 1.723E-12    |
| 20F25077              | 0.6 %  |   | 5.078061  | 0.008703 | 0.021528  | 0.009254 | 0.013963  | 0.000047 | 158.960     | 23.156005    | 1.00112314   | 3.840E-12    |
| 20F25078              | 0.7 %  |   | 4.034894  | 0.006170 | 0.030919  | 0.006435 | 0.009911  | 0.000034 | 158.969     | 23.160134    | 1.00112320   | 4.252E-12    |
| 20F25080              | 0.9 %  |   | 3.578648  | 0.007448 | 0.033207  | 0.008216 | 0.007929  | 0.000034 | 158.988     | 23.168395    | 1.00112333   | 3.033E-12    |
| 20F25081              | 1.1 %  |   | 3.489882  | 0.011259 | 0.035580  | 0.012463 | 0.006682  | 0.000042 | 158.997     | 23.172527    | 1.00112339   | 1.935E-12    |
| 20F25083              | 1.3 %  |   | 3.496289  | 0.008180 | 0.032204  | 0.008913 | 0.005969  | 0.000032 | 159.015     | 23.180793    | 1.00112352   | 2.699E-12    |
| 20F25084              | 1.5 %  |   | 3.730795  | 0.003818 | 0.033747  | 0.003832 | 0.005220  | 0.000018 | 159.024     | 23.184927    | 1.00112358   | 6.651E-12    |
| 20F25086              | 1.8 %  |   | 4.435960  | 0.003172 | 0.030733  | 0.002919 | 0.004967  | 0.000016 | 159.042     | 23.193197    | 1.00112371   | 1.080E-11    |
| 20F25087              | 2.2 %  |   | 4.507640  | 0.003241 | 0.028159  | 0.002919 | 0.002918  | 0.000013 | 159.051     | 23.197651    | 1.00112378   | 1.074E-11    |
| 20F25089              | 2.6 %  |   | 4.985399  | 0.002761 | 0.026552  | 0.002052 | 0.001861  | 0.000009 | 159.069     | 23.205925    | 1.00112391   | 1.706E-11    |
| 20F25090              | 3.1 %  |   | 5.588171  | 0.002514 | 0.024241  | 0.001165 | 0.000999  | 0.000005 | 159.078     | 23.210064    | 1.00112397   | 3.213E-11    |
| 20F25091              | 3.6 %  |   | 5.934312  | 0.002566 | 0.021046  | 0.001056 | 0.000639  | 0.000004 | 159.088     | 23.214203    | 1.00112403   | 3.942E-11    |
| 20F25093              | 4.1 %  |   | 6.077154  | 0.002578 | 0.020637  | 0.000895 | 0.000511  | 0.000003 | 159.106     | 23.222483    | 1.00112416   | 4.614E-11    |
| 20F25094              | 4.7 %  |   | 6.047418  | 0.002566 | 0.020361  | 0.000889 | 0.000312  | 0.000003 | 159.115     | 23.226625    | 1.00112423   | 4.527E-11    |
| 20F25095              | 5.3 %  |   | 6.030997  | 0.002517 | 0.020535  | 0.000814 | 0.000278  | 0.000002 | 159.124     | 23.230767    | 1.00112429   | 5.189E-11    |
| 20F25097              | 6.0 %  |   | 5.992055  | 0.002481 | 0.020355  | 0.000745 | 0.000249  | 0.000002 | 159.142     | 23.239053    | 1.00112442   | 5.399E-11    |
| 20F25098              | 6.8 %  |   | 5.941398  | 0.002505 | 0.019710  | 0.000842 | 0.000277  | 0.000003 | 159.151     | 23.243516    | 1.00112449   | 4.621E-11    |
| 20F25099              | 7.5 %  |   | 5.894141  | 0.002540 | 0.021803  | 0.001027 | 0.000292  | 0.000003 | 159.160     | 23.247661    | 1.00112455   | 3.959E-11    |
| 20F25101              | 8.3 %  |   | 5.857164  | 0.002592 | 0.023167  | 0.001185 | 0.000328  | 0.000003 | 159.178     | 23.255954    | 1.00112468   | 3.492E-11    |
| 20F25102              | 9.1 %  |   | 5.840733  | 0.002752 | 0.022078  | 0.001413 | 0.000423  | 0.000004 | 159.188     | 23.260101    | 1.00112474   | 2.643E-11    |
| 20F25103              | 10.1 % | ✓ | 5.893450  | 0.002903 | 0.020132  | 0.001697 | 0.000661  | 0.000006 | 159.197     | 23.264249    | 1.00112480   | 2.333E-11    |
| 20F25105              | 11.2 % | ✓ | 5.944099  | 0.003156 | 0.020381  | 0.002058 | 0.000809  | 0.000006 | 159.215     | 23.272547    | 1.00112493   | 1.941E-11    |
| 20F25106              | 12.4 % | ✓ | 6.092913  | 0.003558 | 0.022601  | 0.002647 | 0.001281  | 0.000009 | 159.224     | 23.276697    | 1.00112500   | 1.566E-11    |
| 20F25107              | 13.6 % | ✓ | 6.329092  | 0.004151 | 0.022286  | 0.003401 | 0.001973  | 0.000012 | 159.233     | 23.280848    | 1.00112506   | 1.287E-11    |
| 20F25109              | 14.9 % | ✓ | 6.627490  | 0.004940 | 0.022776  | 0.004116 | 0.002814  | 0.000015 | 159.251     | 23.289472    | 1.00112519   | 1.070E-11    |
| 20F25110              | 16.2 % | ✓ | 6.943044  | 0.005924 | 0.015952  | 0.005019 | 0.003726  | 0.000019 | 159.260     | 23.293625    | 1.00112526   | 8.928E-12    |
| 20F25111              | 17.6 % | ✓ | 7.272811  | 0.007115 | 0.023461  | 0.006447 | 0.004752  | 0.000026 | 159.269     | 23.297779    | 1.00112532   | 7.640E-12    |
| 20F25113              | 19.0 % | ✓ | 7.607472  | 0.008508 | 0.021734  | 0.007791 | 0.005809  | 0.000030 | 159.287     | 23.306090    | 1.00112545   | 6.552E-12    |
| 20F25114              | 20.5 % | ✓ | 7.878573  | 0.009944 | 0.024289  | 0.009183 | 0.006542  | 0.000037 | 159.297     | 23.310246    | 1.00112551   | 5.727E-12    |
| 20F25116              | 22.3 % | ✓ | 8.061357  | 0.010937 | 0.024822  | 0.010069 | 0.007090  | 0.000037 | 159.315     | 23.318561    | 1.00112564   | 5.359E-12    |

| Procedure<br>Blanks |        | 36Ar ± 1σ (SE)<br>[fA] | 37Ar ± 1σ (SE)<br>[fA] | 38Ar ± 1σ (SE)<br>[fA] | 39Ar ± 1σ (SE)<br>[fA] | 40Ar ± 1σ (SE)<br>[fA] |
|---------------------|--------|------------------------|------------------------|------------------------|------------------------|------------------------|
| 20F25072            | 0.3 %  | 0.0150312 ±0.0003363   | 0.0144755 ±0.0059028   | 0.0088138 ±0.0063558   | 0.0074910 ±0.0087883   | 4.1589343 ±0.1690325   |
| 20F25074            | 0.4 %  | 0.0163180 ±0.0003363   | 0.0164461 ±0.0059028   | 0.0063473 ±0.0063558   | 0.0089351 ±0.0087883   | 4.5302760 ±0.1690325   |
| 20F25075            | 0.5 %  | 0.0168752 ±0.0003363   | 0.0171325 ±0.0059028   | 0.0054368 ±0.0063558   | 0.0092749 ±0.0087883   | 4.6913522 ±0.1690325   |
| 20F25077            | 0.6 %  | 0.0178571 ±0.0003363   | 0.0180141 ±0.0059028   | 0.0041023 ±0.0063558   | 0.0094049 ±0.0087883   | 4.9769667 ±0.1690325   |
| 20F25078            | 0.7 %  | 0.0182489 ±0.0003363   | 0.0182106 ±0.0059028   | 0.0036809 ±0.0063558   | 0.0092739 ±0.0087883   | 5.0922590 ±0.1690325   |
| 20F25080            | 0.9 %  | 0.0188835 ±0.0003363   | 0.0182373 ±0.0059028   | 0.0031654 ±0.0063558   | 0.0088148 ±0.0087883   | 5.2827219 ±0.1690325   |
| 20F25081            | 1.1 %  | 0.0191301 ±0.0003363   | 0.0180966 ±0.0059028   | 0.0030343 ±0.0063558   | 0.0085493 ±0.0087883   | 5.3591539 ±0.1690325   |
| 20F25083            | 1.3 %  | 0.0194913 ±0.0003363   | 0.0175754 ±0.0059028   | 0.0029416 ±0.0063558   | 0.0080817 ±0.0087883   | 5.4775570 ±0.1690325   |
| 20F25084            | 1.5 %  | 0.0196101 ±0.0003363   | 0.0172206 ±0.0059028   | 0.0029504 ±0.0063558   | 0.0079251 ±0.0087883   | 5.5207769 ±0.1690325   |
| 20F25086            | 1.8 %  | 0.0197350 ±0.0003363   | 0.0163827 ±0.0059028   | 0.0030138 ±0.0063558   | 0.0078592 ±0.0087883   | 5.5783594 ±0.1690325   |
| 20F25087            | 2.2 %  | 0.0197451 ±0.0003363   | 0.0158857 ±0.0059028   | 0.0030482 ±0.0063558   | 0.0079922 ±0.0087883   | 5.5948198 ±0.1690325   |
| 20F25089            | 2.6 %  | 0.0196699 ±0.0003363   | 0.0149312 ±0.0059028   | 0.0030653 ±0.0063558   | 0.0086042 ±0.0087883   | 5.6015775 ±0.1690325   |
| 20F25090            | 3.1 %  | 0.0195917 ±0.0003363   | 0.0144578 ±0.0059028   | 0.0030361 ±0.0063558   | 0.0090995 ±0.0087883   | 5.5945947 ±0.1690325   |
| 20F25091            | 3.6 %  | 0.0194897 ±0.0003363   | 0.0139985 ±0.0059028   | 0.0029743 ±0.0063558   | 0.0097237 ±0.0087883   | 5.5815160 ±0.1690325   |
| 20F25093            | 4.1 %  | 0.0192252 ±0.0003363   | 0.0131537 ±0.0059028   | 0.0027375 ±0.0063558   | 0.0113501 ±0.0087883   | 5.5394937 ±0.1690325   |
| 20F25094            | 4.7 %  | 0.0190682 ±0.0003363   | 0.0127825 ±0.0059028   | 0.0025580 ±0.0063558   | 0.0123408 ±0.0087883   | 5.5117562 ±0.1690325   |
| 20F25095            | 5.3 %  | 0.0188985 ±0.0003363   | 0.0124540 ±0.0059028   | 0.0023370 ±0.0063558   | 0.0134375 ±0.0087883   | 5.4803349 ±0.1690325   |
| 20F25097            | 6.0 %  | 0.0185326 ±0.0003363   | 0.0119476 ±0.0059028   | 0.0017751 ±0.0063558   | 0.0158944 ±0.0087883   | 5.4088304 ±0.1690325   |
| 20F25098            | 6.8 %  | 0.0183279 ±0.0003363   | 0.0117690 ±0.0059028   | 0.0014126 ±0.0063558   | 0.0173244 ±0.0087883   | 5.3668827 ±0.1690325   |
| 20F25099            | 7.5 %  | 0.0181372 ±0.0003363   | 0.0116681 ±0.0059028   | 0.0010447 ±0.0063558   | 0.0186901 ±0.0087883   | 5.3266071 ±0.1690325   |
| 20F25101            | 8.3 %  | 0.0177678 ±0.0003363   | 0.0116668 ±0.0059028   | 0.0002437 ±0.0063558   | 0.0214287 ±0.0087883   | 5.2446304 ±0.1690325   |
| 20F25102            | 9.1 %  | 0.0175955 ±0.0003363   | 0.0117717 ±0.0059028   | 0.0001736 ±0.0063558   | 0.0227444 ±0.0087883   | 5.2041011 ±0.1690325   |
| 20F25103            | 10.1 % | 0.0174361 ±0.0003363   | 0.0119495 ±0.0059028   | 0.0005894 ±0.0063558   | 0.0239814 ±0.0087883   | 5.1646557 ±0.1690325   |
| 20F25105            | 11.2 % | 0.0171697 ±0.0003363   | 0.0125276 ±0.0059028   | 0.0013719 ±0.0063558   | 0.0260739 ±0.0087883   | 5.0913368 ±0.1690325   |
| 20F25106            | 12.4 % | 0.0170699 ±0.0003363   | 0.0129287 ±0.0059028   | 0.0017127 ±0.0063558   | 0.0268494 ±0.0087883   | 5.0586182 ±0.1690325   |
| 20F25107            | 13.6 % | 0.0169973 ±0.0003363   | 0.0134038 ±0.0059028   | 0.0020007 ±0.0063558   | 0.0273865 ±0.0087883   | 5.0292933 ±0.1690325   |
| 20F25109            | 14.9 % | 0.0169496 ±0.0003363   | 0.0146219 ±0.0059028   | 0.0023591 ±0.0063558   | 0.0275324 ±0.0087883   | 4.9817136 ±0.1690325   |
| 20F25110            | 16.2 % | 0.0169844 ±0.0003363   | 0.0153157 ±0.0059028   | 0.0023789 ±0.0063558   | 0.0270285 ±0.0087883   | 4.9664105 ±0.1690325   |
| 20F25111            | 17.6 % | 0.0170620 ±0.0003363   | 0.0160755 ±0.0059028   | 0.0022728 ±0.0063558   | 0.0260766 ±0.0087883   | 4.9568206 ±0.1690325   |
| 20F25113            | 19.0 % | 0.0173620 ±0.0003363   | 0.0177792 ±0.0059028   | 0.0015975 ±0.0063558   | 0.0225916 ±0.0087883   | 4.9570321 ±0.1690325   |
| 20F25114            | 20.5 % | 0.0175927 ±0.0003363   | 0.0187146 ±0.0059028   | 0.0009824 ±0.0063558   | 0.0199329 ±0.0087883   | 4.9679543 ±0.1690325   |
| 20F25116            | 22.3 % | 0.0182367 ±0.0003363   | 0.0207268 ±0.0059028   | 0.0009269 ±0.0063558   | 0.0124476 ±0.0087883   | 5.0142177 ±0.1690325   |

| OSU Argon Geochronology Lab<br>CEOAS Oregon State University, Corvallis, USA |        |                        |        |                |                       |        |                        |                       |        |                     |                       |                        |                |                      |                     |                |                        |        |                |                     |        |                        |                     |        |                     |                     |        |                |                    |        |                |                    |        |                |
|------------------------------------------------------------------------------|--------|------------------------|--------|----------------|-----------------------|--------|------------------------|-----------------------|--------|---------------------|-----------------------|------------------------|----------------|----------------------|---------------------|----------------|------------------------|--------|----------------|---------------------|--------|------------------------|---------------------|--------|---------------------|---------------------|--------|----------------|--------------------|--------|----------------|--------------------|--------|----------------|
| Intercept Values                                                             |        | 36Ar ± 1σ (SE)<br>[fA] |        | r2             | Regression (type,n)   |        | 37Ar ± 1σ (SE)<br>[fA] |                       | r2     | Regression (type,n) |                       | 38Ar ± 1σ (SE)<br>[fA] |                | r2                   | Regression (type,n) |                | 39Ar ± 1σ (SE)<br>[fA] |        | r2             | Regression (type,n) |        | 40Ar ± 1σ (SE)<br>[fA] |                     | r2     | Regression (type,n) |                     |        |                |                    |        |                |                    |        |                |
| 20F25072                                                                     | 0.3 %  | 0.3915881 ± 0.0008278  | 0.9549 | EXP 150 of 150 | 0.0008758 ± 0.0058579 | 0.0023 | EXP 150 of 150         | 0.3187792 ± 0.0064707 | 0.1584 | EXP 150 of 150      | 16.742674 ± 0.007728  | 0.9980                 | EXP 150 of 150 | 135.26271 ± 0.02192  | 0.9996              | EXP 150 of 150 | 105.67420 ± 0.01984    | 0.9994 | EXP 150 of 150 | 53.36615 ± 0.01656  | 0.9967 | EXP 148 of 150         | 113.45413 ± 0.02158 | 0.9994 | EXP 150 of 150      | 125.21327 ± 0.02283 | 0.9994 | EXP 149 of 150 | 90.96834 ± 0.01811 | 0.9991 | EXP 150 of 150 | 60.01919 ± 0.01990 | 0.9958 | EXP 150 of 150 |
| 20F25074                                                                     | 0.4 %  | 0.3009785 ± 0.0007151  | 0.9353 | EXP 145 of 150 | 0.0087867 ± 0.0058317 | 0.0014 | EXP 150 of 150         | 0.2921164 ± 0.0061669 | 0.2465 | EXP 150 of 150      | 14.975199 ± 0.008678  | 0.9968                 | EXP 150 of 150 | 105.67420 ± 0.01984  | 0.9994              | EXP 150 of 150 | 53.36615 ± 0.01656     | 0.9967 | EXP 148 of 150 | 113.45413 ± 0.02158 | 0.9994 | EXP 150 of 150         | 125.21327 ± 0.02283 | 0.9994 | EXP 149 of 150      | 90.96834 ± 0.01811  | 0.9991 | EXP 150 of 150 | 60.01919 ± 0.01990 | 0.9958 | EXP 150 of 150 |                    |        |                |
| 20F25075                                                                     | 0.5 %  | 0.1496127 ± 0.0005536  | 0.8134 | EXP 150 of 150 | 0.0051586 ± 0.0062108 | 0.0220 | EXP 148 of 150         | 0.1683710 ± 0.0056064 | 0.1058 | EXP 150 of 150      | 9.053874 ± 0.007428   | 0.9934                 | EXP 150 of 150 | 53.36615 ± 0.01656   | 0.9967              | EXP 148 of 150 | 113.45413 ± 0.02158    | 0.9994 | EXP 150 of 150 | 125.21327 ± 0.02283 | 0.9994 | EXP 149 of 150         | 90.96834 ± 0.01811  | 0.9991 | EXP 150 of 150      | 60.01919 ± 0.01990  | 0.9958 | EXP 150 of 150 |                    |        |                |                    |        |                |
| 20F25077                                                                     | 0.6 %  | 0.3069799 ± 0.0007713  | 0.9296 | EXP 150 of 150 | 0.0018607 ± 0.0061754 | 0.0022 | EXP 150 of 150         | 0.3943329 ± 0.0065458 | 0.3370 | EXP 148 of 150      | 21.352569 ± 0.008221  | 0.9986                 | EXP 150 of 150 | 113.45413 ± 0.02158  | 0.9994              | EXP 150 of 150 | 125.21327 ± 0.02283    | 0.9994 | EXP 149 of 150 | 90.96834 ± 0.01811  | 0.9991 | EXP 150 of 150         | 60.01919 ± 0.01990  | 0.9958 | EXP 150 of 150      |                     |        |                |                    |        |                |                    |        |                |
| 20F25078                                                                     | 0.7 %  | 0.3042551 ± 0.0008026  | 0.9085 | EXP 150 of 150 | 0.0215626 ± 0.0057998 | 0.0048 | EXP 150 of 150         | 0.5290916 ± 0.0061520 | 0.4157 | EXP 150 of 150      | 29.753670 ± 0.008585  | 0.9992                 | EXP 150 of 150 | 125.21327 ± 0.02283  | 0.9994              | EXP 149 of 150 | 90.96834 ± 0.01811     | 0.9991 | EXP 150 of 150 | 60.01919 ± 0.01990  | 0.9958 | EXP 150 of 150         |                     |        |                     |                     |        |                |                    |        |                |                    |        |                |
| 20F25080                                                                     | 0.9 %  | 0.2029152 ± 0.0006512  | 0.8661 | EXP 150 of 150 | 0.0161058 ± 0.0061105 | 0.0106 | EXP 150 of 150         | 0.4367237 ± 0.0056767 | 0.4333 | EXP 148 of 150      | 23.931352 ± 0.007869  | 0.9990                 | EXP 149 of 150 | 90.96834 ± 0.01811   | 0.9991              | EXP 150 of 150 | 60.01919 ± 0.01990     | 0.9958 | EXP 150 of 150 |                     |        |                        |                     |        |                     |                     |        |                |                    |        |                |                    |        |                |
| 20F25081                                                                     | 1.1 %  | 0.1205808 ± 0.0005102  | 0.6522 | EXP 149 of 150 | 0.0059697 ± 0.0060169 | 0.0060 | EXP 150 of 150         | 0.2848357 ± 0.0067921 | 0.1830 | EXP 150 of 150      | 15.657219 ± 0.007747  | 0.9977                 | EXP 150 of 150 | 60.01919 ± 0.01990   | 0.9958              | EXP 150 of 150 |                        |        |                |                     |        |                        |                     |        |                     |                     |        |                |                    |        |                |                    |        |                |
| 20F25083                                                                     | 1.3 %  | 0.1456765 ± 0.0005431  | 0.7654 | EXP 150 of 150 | 0.0127462 ± 0.0059635 | 0.0050 | EXP 150 of 150         | 0.3793669 ± 0.0069848 | 0.2212 | EXP 149 of 150      | 21.798755 ± 0.009148  | 0.9984                 | EXP 150 of 150 | 81.73106 ± 0.02016   | 0.9985              | EXP 150 of 150 |                        |        |                |                     |        |                        |                     |        |                     |                     |        |                |                    |        |                |                    |        |                |
| 20F25084                                                                     | 1.5 %  | 0.2744537 ± 0.0006867  | 0.9178 | EXP 147 of 150 | 0.0561372 ± 0.0058665 | 0.0209 | EXP 149 of 150         | 0.8804293 ± 0.0067552 | 0.6668 | EXP 149 of 150      | 50.325370 ± 0.009916  | 0.9996                 | EXP 150 of 150 | 193.40997 ± 0.02437  | 0.9998              | EXP 150 of 150 |                        |        |                |                     |        |                        |                     |        |                     |                     |        |                |                    |        |                |                    |        |                |
| 20F25086                                                                     | 1.8 %  | 0.3509894 ± 0.0008426  | 0.9239 | EXP 150 of 150 | 0.0748535 ± 0.0063299 | 0.0421 | EXP 149 of 150         | 1.1315239 ± 0.0066194 | 0.7574 | EXP 150 of 150      | 68.750062 ± 0.011651  | 0.9997                 | EXP 150 of 150 | 310.78427 ± 0.02714  | 0.9999              | EXP 149 of 150 |                        |        |                |                     |        |                        |                     |        |                     |                     |        |                |                    |        |                |                    |        |                |
| 20F25087                                                                     | 2.2 %  | 0.2101967 ± 0.0006830  | 0.7433 | EXP 150 of 150 | 0.0659096 ± 0.0060749 | 0.0279 | EXP 150 of 150         | 1.0387789 ± 0.0065051 | 0.7342 | EXP 150 of 150      | 67.282722 ± 0.011627  | 0.9997                 | EXP 150 of 150 | 309.11190 ± 0.02721  | 0.9999              | EXP 150 of 150 |                        |        |                |                     |        |                        |                     |        |                     |                     |        |                |                    |        |                |                    |        |                |
| 20F25089                                                                     | 2.6 %  | 0.1940397 ± 0.0006739  | 0.6113 | EXP 150 of 150 | 0.0957245 ± 0.0061650 | 0.0307 | EXP 150 of 150         | 1.3706020 ± 0.0069412 | 0.7995 | EXP 149 of 150      | 96.564480 ± 0.013208  | 0.9998                 | EXP 150 of 150 | 487.39474 ± 0.03380  | 0.9999              | EXP 150 of 150 |                        |        |                |                     |        |                        |                     |        |                     |                     |        |                |                    |        |                |                    |        |                |
| 20F25090                                                                     | 3.1 %  | 0.1769278 ± 0.0006097  | 0.1754 | EXP 146 of 150 | 0.1552830 ± 0.0055773 | 0.0935 | EXP 150 of 150         | 2.0710859 ± 0.0059019 | 0.9270 | EXP 150 of 150      | 162.268501 ± 0.016481 | 0.9999                 | EXP 150 of 150 | 913.12582 ± 0.04708  | 1.0000              | EXP 150 of 150 |                        |        |                |                     |        |                        |                     |        |                     |                     |        |                |                    |        |                |                    |        |                |
| 20F25091                                                                     | 3.6 %  | 0.1357650 ± 0.0005804  | 0.3527 | EXP 150 of 150 | 0.1562293 ± 0.0061185 | 0.0415 | EXP 150 of 150         | 2.2272481 ± 0.0068854 | 0.9185 | EXP 150 of 150      | 187.475689 ± 0.017025 | 0.9999                 | EXP 141 of 150 | 1119.04217 ± 0.04520 | 1.0000              | EXP 147 of 150 |                        |        |                |                     |        |                        |                     |        |                     |                     |        |                |                    |        |                |                    |        |                |
| 20F25093                                                                     | 4.1 %  | 0.1254610 ± 0.0005322  | 0.6739 | EXP 149 of 150 | 0.1775894 ± 0.0057328 | 0.1490 | EXP 150 of 150         | 2.4541201 ± 0.0062635 | 0.9449 | EXP 150 of 150      | 214.302826 ± 0.018878 | 0.9999                 | EXP 149 of 150 | 1308.96800 ± 0.05770 | 1.0000              | EXP 150 of 150 |                        |        |                |                     |        |                        |                     |        |                     |                     |        |                |                    |        |                |                    |        |                |
| 20F25094                                                                     | 4.7 %  | 0.0830608 ± 0.0004604  | 0.8723 | EXP 150 of 150 | 0.1727081 ± 0.0054766 | 0.1356 | EXP 150 of 150         | 2.3789133 ± 0.0063026 | 0.9353 | EXP 150 of 150      | 211.269666 ± 0.018193 | 0.9999                 | EXP 150 of 150 | 1284.19779 ± 0.05268 | 1.0000              | EXP 150 of 150 |                        |        |                |                     |        |                        |                     |        |                     |                     |        |                |                    |        |                |                    |        |                |
| 20F25095                                                                     | 5.3 %  | 0.0844405 ± 0.0004175  | 0.9254 | EXP 149 of 150 | 0.2025306 ± 0.0060700 | 0.0982 | EXP 150 of 150         | 2.7459727 ± 0.0068526 | 0.9470 | EXP 147 of 150      | 242.824417 ± 0.019817 | 0.9999                 | EXP 150 of 150 | 1471.16173 ± 0.05000 | 1.0000              | EXP 150 of 150 |                        |        |                |                     |        |                        |                     |        |                     |                     |        |                |                    |        |                |                    |        |                |
| 20F25097                                                                     | 6.0 %  | 0.0800500 ± 0.0004410  | 0.9227 | EXP 150 of 150 | 0.2111342 ± 0.0055512 | 0.1311 | EXP 146 of 150         | 2.8632316 ± 0.0075587 | 0.9351 | EXP 150 of 150      | 254.298138 ± 0.017605 | 1.0000                 | EXP 150 of 150 | 1530.42357 ± 0.05741 | 1.0000              | EXP 148 of 150 |                        |        |                |                     |        |                        |                     |        |                     |                     |        |                |                    |        |                |                    |        |                |
| 20F25098                                                                     | 6.8 %  | 0.0774202 ± 0.0004461  | 0.9029 | EXP 150 of 150 | 0.1746626 ± 0.0052769 | 0.0565 | EXP 150 of 150         | 2.4576572 ± 0.0063568 | 0.9387 | EXP 149 of 150      | 219.517799 ± 0.016962 | 0.9999                 | EXP 147 of 150 | 1310.65490 ± 0.05336 | 1.0000              | EXP 150 of 150 |                        |        |                |                     |        |                        |                     |        |                     |                     |        |                |                    |        |                |                    |        |                |
| 20F25099                                                                     | 7.5 %  | 0.0717457 ± 0.0004713  | 0.8797 | EXP 150 of 150 | 0.1663956 ± 0.0059054 | 0.1408 | EXP 150 of 150         | 2.1811131 ± 0.0071624 | 0.9042 | EXP 150 of 150      | 189.572864 ± 0.015627 | 0.9999                 | EXP 150 of 150 | 1123.56944 ± 0.05263 | 1.0000              | EXP 148 of 150 |                        |        |                |                     |        |                        |                     |        |                     |                     |        |                |                    |        |                |                    |        |                |
| 20F25101                                                                     | 8.3 %  | 0.0713241 ± 0.0004465  | 0.8411 | EXP 150 of 150 | 0.1562427 ± 0.0061931 | 0.1259 | EXP 150 of 150         | 1.9144931 ± 0.0066773 | 0.8894 | EXP 148 of 150      | 168.306440 ± 0.017031 | 0.9999                 | EXP 150 of 150 | 991.78559 ± 0.04180  | 1.0000              | EXP 150 of 150 |                        |        |                |                     |        |                        |                     |        |                     |                     |        |                |                    |        |                |                    |        |                |
| 20F25102                                                                     | 9.1 %  | 0.0699574 ± 0.0004316  | 0.7859 | EXP 150 of 150 | 0.1096622 ± 0.0050223 | 0.0815 | EXP 150 of 150         | 1.4875255 ± 0.0065003 | 0.8415 | EXP 148 of 150      | 127.753633 ± 0.013566 | 0.9999                 | EXP 149 of 150 | 751.90321 ± 0.04069  | 1.0000              | EXP 150 of 150 |                        |        |                |                     |        |                        |                     |        |                     |                     |        |                |                    |        |                |                    |        |                |
| 20F25103                                                                     | 10.1 % | 0.0891296 ± 0.0005018  | 0.4138 | EXP 150 of 150 | 0.0848856 ± 0.0056164 | 0.0077 | EXP 149 of 150         | 1.3181711 ± 0.0072000 | 0.7692 | EXP 150 of 150      | 111.742442 ± 0.014051 | 0.9999                 | EXP 149 of 150 | 664.15180 ± 0.03691  | 1.0000              | EXP 150 of 150 |                        |        |                |                     |        |                        |                     |        |                     |                     |        |                |                    |        |                |                    |        |                |
| 20F25105                                                                     | 11.2 % | 0.0894826 ± 0.0004348  | 0.2814 | EXP 150 of 150 | 0.0682994 ± 0.0056209 | 0.0067 | EXP 150 of 150         | 1.0753099 ± 0.0061086 | 0.7693 | EXP 150 of 150      | 92.171166 ± 0.013403  | 0.9998                 | EXP 149 of 150 | 553.29338 ± 0.03781  | 0.9999              | EXP 150 of 150 |                        |        |                |                     |        |                        |                     |        |                     |                     |        |                |                    |        |                |                    |        |                |
| 20F25106                                                                     | 12.4 % | 0.1071753 ± 0.0004854  | 0.0309 | EXP 149 of 150 | 0.0576087 ± 0.0057689 | 0.0336 | EXP 149 of 150         | 0.8612587 ± 0.0067097 | 0.6102 | EXP 150 of 150      | 72.557406 ± 0.011185  | 0.9998                 | EXP 150 of 150 | 447.37031 ± 0.03013  | 0.9999              | EXP 150 of 150 |                        |        |                |                     |        |                        |                     |        |                     |                     |        |                |                    |        |                |                    |        |                |
| 20F25107                                                                     | 13.6 % | 0.1268921 ± 0.0005735  | 0.2997 | EXP 150 of 150 | 0.0416307 ± 0.0059693 | 0.0140 | EXP 150 of 150         | 0.6745440 ± 0.0066193 | 0.5202 | EXP 150 of 150      | 57.425620 ± 0.010248  | 0.9997                 | EXP 150 of 150 | 368.62806 ± 0.03051  | 0.9999              | EXP 150 of 150 |                        |        |                |                     |        |                        |                     |        |                     |                     |        |                |                    |        |                |                    |        |                |
| 20F25109                                                                     | 14.9 % | 0.1412924 ± 0.0005345  | 0.5385 | EXP 150 of 150 | 0.0299984 ± 0.0054887 | 0.0183 | EXP 150 of 150         | 0.5583614 ± 0.0067586 | 0.4221 | EXP 147 of 150      | 45.579915 ± 0.009610  | 0.9996                 | EXP 149 of 150 | 307.14571 ± 0.02875  | 0.9999              | EXP 150 of 150 |                        |        |                |                     |        |                        |                     |        |                     |                     |        |                |                    |        |                |                    |        |                |
| 20F25110                                                                     | 16.2 % | 0.1481744 ± 0.0005458  | 0.6192 | EXP 150 of 150 | 0.0095769 ± 0.0051453 | 0.0036 | EXP 150 of 150         | 0.4357463 ± 0.0071021 | 0.2789 | EXP 150 of 150      | 36.318184 ± 0.008587  | 0.9995                 | EXP 149 of 150 | 257.15954 ± 0.02799  | 0.9998              | EXP 150 of 150 |                        |        |                |                     |        |                        |                     |        |                     |                     |        |                |                    |        |                |                    |        |                |
| 20F25111                                                                     | 17.6 % | 0.1537364 ± 0.0006113  | 0.6592 | EXP 150 of 150 | 0.0138278 ± 0.0057148 | 0.0055 | EXP 150 of 150         | 0.3622187 ± 0.0063311 | 0.2387 | EXP 150 of 150      | 29.672906 ± 0.008931  | 0.9991                 | EXP 149 of 150 | 220.76263 ± 0.02482  | 0.9998              | EXP 150 of 150 |                        |        |                |                     |        |                        |                     |        |                     |                     |        |                |                    |        |                |                    |        |                |
| 20F25113                                                                     | 19.0 % | 0.1543516 ± 0.0005726  | 0.7365 | EXP 150 of 150 | 0.0049248 ± 0.0056016 | 0.0027 | EXP 148 of 150         | 0.3116900 ± 0.0059336 | 0.2883 | EXP 150 of 150      | 24.329221 ± 0.008226  | 0.9989                 | EXP 149 of 150 | 190.03203 ± 0.02590  | 0.9997              | EXP 150 of 150 |                        |        |                |                     |        |                        |                     |        |                     |                     |        |                |                    |        |                |                    |        |                |
| 20F25114                                                                     | 20.5 % | 0.1478041 ± 0.0006059  | 0.6899 | EXP 148 of 150 | 0.0026982 ± 0.0055390 | 0.0049 | EXP 150 of 150         | 0.2549561 ± 0.0064525 | 0.1142 | EXP 148 of 150      | 20.536823 ± 0.007897  | 0.9986                 | EXP 150 of 150 | 166.75427 ± 0.02166  | 0.9997              | EXP 150 of 150 |                        |        |                |                     |        |                        |                     |        |                     |                     |        |                |                    |        |                |                    |        |                |
| 20F25116                                                                     | 22.3 % | 0.1473050 ± 0.0005357  | 0.7591 | EXP 147 of 150 | 0.0007212 ± 0.0055682 | 0.0006 | EXP 150 of 150         | 0.2514464 ± 0.0060485 | 0.2516 | EXP 150 of 150      | 18.775952 ± 0.008315  | 0.9981                 | EXP 150 of 150 | 156.40689 ± 0.02468  | 0.9996              | EXP 150 of 150 |                        |        |                |                     |        |                        |                     |        |                     |                     |        |                |                    |        |                |                    |        |                |



| Project Info |        | Analyst     | Irradiation | X-pos | Y-pos | Z/H-pos | Project                | Experiment | Nmb |
|--------------|--------|-------------|-------------|-------|-------|---------|------------------------|------------|-----|
| 20F25072     | 0.3 %  | Dan Miggins | 20-OSU-01   | 0.00  | 0.00  | 43.00   | Oregon\Swenton (20-01) | 20F25068   | 01  |
| 20F25074     | 0.4 %  | Dan Miggins | 20-OSU-01   | 0.00  | 0.00  | 43.00   | Oregon\Swenton (20-01) | 20F25068   | 01  |
| 20F25075     | 0.5 %  | Dan Miggins | 20-OSU-01   | 0.00  | 0.00  | 43.00   | Oregon\Swenton (20-01) | 20F25068   | 01  |
| 20F25077     | 0.6 %  | Dan Miggins | 20-OSU-01   | 0.00  | 0.00  | 43.00   | Oregon\Swenton (20-01) | 20F25068   | 01  |
| 20F25078     | 0.7 %  | Dan Miggins | 20-OSU-01   | 0.00  | 0.00  | 43.00   | Oregon\Swenton (20-01) | 20F25068   | 01  |
| 20F25080     | 0.9 %  | Dan Miggins | 20-OSU-01   | 0.00  | 0.00  | 43.00   | Oregon\Swenton (20-01) | 20F25068   | 01  |
| 20F25081     | 1.1 %  | Dan Miggins | 20-OSU-01   | 0.00  | 0.00  | 43.00   | Oregon\Swenton (20-01) | 20F25068   | 01  |
| 20F25083     | 1.3 %  | Dan Miggins | 20-OSU-01   | 0.00  | 0.00  | 43.00   | Oregon\Swenton (20-01) | 20F25068   | 01  |
| 20F25084     | 1.5 %  | Dan Miggins | 20-OSU-01   | 0.00  | 0.00  | 43.00   | Oregon\Swenton (20-01) | 20F25068   | 01  |
| 20F25086     | 1.8 %  | Dan Miggins | 20-OSU-01   | 0.00  | 0.00  | 43.00   | Oregon\Swenton (20-01) | 20F25068   | 01  |
| 20F25087     | 2.2 %  | Dan Miggins | 20-OSU-01   | 0.00  | 0.00  | 43.00   | Oregon\Swenton (20-01) | 20F25068   | 01  |
| 20F25089     | 2.6 %  | Dan Miggins | 20-OSU-01   | 0.00  | 0.00  | 43.00   | Oregon\Swenton (20-01) | 20F25068   | 01  |
| 20F25090     | 3.1 %  | Dan Miggins | 20-OSU-01   | 0.00  | 0.00  | 43.00   | Oregon\Swenton (20-01) | 20F25068   | 01  |
| 20F25091     | 3.6 %  | Dan Miggins | 20-OSU-01   | 0.00  | 0.00  | 43.00   | Oregon\Swenton (20-01) | 20F25068   | 01  |
| 20F25093     | 4.1 %  | Dan Miggins | 20-OSU-01   | 0.00  | 0.00  | 43.00   | Oregon\Swenton (20-01) | 20F25068   | 01  |
| 20F25094     | 4.7 %  | Dan Miggins | 20-OSU-01   | 0.00  | 0.00  | 43.00   | Oregon\Swenton (20-01) | 20F25068   | 01  |
| 20F25095     | 5.3 %  | Dan Miggins | 20-OSU-01   | 0.00  | 0.00  | 43.00   | Oregon\Swenton (20-01) | 20F25068   | 01  |
| 20F25097     | 6.0 %  | Dan Miggins | 20-OSU-01   | 0.00  | 0.00  | 43.00   | Oregon\Swenton (20-01) | 20F25068   | 01  |
| 20F25098     | 6.8 %  | Dan Miggins | 20-OSU-01   | 0.00  | 0.00  | 43.00   | Oregon\Swenton (20-01) | 20F25068   | 01  |
| 20F25099     | 7.5 %  | Dan Miggins | 20-OSU-01   | 0.00  | 0.00  | 43.00   | Oregon\Swenton (20-01) | 20F25068   | 01  |
| 20F25101     | 8.3 %  | Dan Miggins | 20-OSU-01   | 0.00  | 0.00  | 43.00   | Oregon\Swenton (20-01) | 20F25068   | 01  |
| 20F25102     | 9.1 %  | Dan Miggins | 20-OSU-01   | 0.00  | 0.00  | 43.00   | Oregon\Swenton (20-01) | 20F25068   | 01  |
| 20F25103     | 10.1 % | Dan Miggins | 20-OSU-01   | 0.00  | 0.00  | 43.00   | Oregon\Swenton (20-01) | 20F25068   | 01  |
| 20F25105     | 11.2 % | Dan Miggins | 20-OSU-01   | 0.00  | 0.00  | 43.00   | Oregon\Swenton (20-01) | 20F25068   | 01  |
| 20F25106     | 12.4 % | Dan Miggins | 20-OSU-01   | 0.00  | 0.00  | 43.00   | Oregon\Swenton (20-01) | 20F25068   | 01  |
| 20F25107     | 13.6 % | Dan Miggins | 20-OSU-01   | 0.00  | 0.00  | 43.00   | Oregon\Swenton (20-01) | 20F25068   | 01  |
| 20F25109     | 14.9 % | Dan Miggins | 20-OSU-01   | 0.00  | 0.00  | 43.00   | Oregon\Swenton (20-01) | 20F25068   | 01  |
| 20F25110     | 16.2 % | Dan Miggins | 20-OSU-01   | 0.00  | 0.00  | 43.00   | Oregon\Swenton (20-01) | 20F25068   | 01  |
| 20F25111     | 17.6 % | Dan Miggins | 20-OSU-01   | 0.00  | 0.00  | 43.00   | Oregon\Swenton (20-01) | 20F25068   | 01  |
| 20F25113     | 19.0 % | Dan Miggins | 20-OSU-01   | 0.00  | 0.00  | 43.00   | Oregon\Swenton (20-01) | 20F25068   | 01  |
| 20F25114     | 20.5 % | Dan Miggins | 20-OSU-01   | 0.00  | 0.00  | 43.00   | Oregon\Swenton (20-01) | 20F25068   | 01  |
| 20F25116     | 22.3 % | Dan Miggins | 20-OSU-01   | 0.00  | 0.00  | 43.00   | Oregon\Swenton (20-01) | 20F25068   | 01  |

| Sample Parameters |        | Sample   | Material   | Location      | Standard Name    | Standard (in Ma) | %1σ   | Standard Reference  | Standard 40Ar/39Ar | %1σ   | J          | %1σ   | Air 40Ar/36Ar | %1σ   | MDF (lin) | %1σ   | Volume Ratio | Sensitivity (mol/volt) | Day | Month | Year | Hour | Min | Resist |
|-------------------|--------|----------|------------|---------------|------------------|------------------|-------|---------------------|--------------------|-------|------------|-------|---------------|-------|-----------|-------|--------------|------------------------|-----|-------|------|------|-----|--------|
| 20F25072          | 0.3 %  | VS19-080 | Groundmass | Rhyolite Dome | FCT-NM (1C34-20) | 28.201           | 0.082 | Kuiper et al (2008) | 9.55461            | 0.155 | 0.00162492 | 0.155 | 298.269       | 0.116 | 1.0002442 | 0.039 | 1            | 3.54E-14               | 22  | SEP   | 2020 | 12   | 28  | 1      |
| 20F25074          | 0.4 %  | VS19-080 | Groundmass | Rhyolite Dome | FCT-NM (1C34-20) | 28.201           | 0.082 | Kuiper et al (2008) | 9.55461            | 0.155 | 0.00162492 | 0.155 | 298.269       | 0.116 | 1.0002442 | 0.039 | 1            | 3.54E-14               | 22  | SEP   | 2020 | 12   | 54  | 1      |
| 20F25075          | 0.5 %  | VS19-080 | Groundmass | Rhyolite Dome | FCT-NM (1C34-20) | 28.201           | 0.082 | Kuiper et al (2008) | 9.55461            | 0.155 | 0.00162492 | 0.155 | 298.269       | 0.116 | 1.0002442 | 0.039 | 1            | 3.54E-14               | 22  | SEP   | 2020 | 13   | 7   | 1      |
| 20F25077          | 0.6 %  | VS19-080 | Groundmass | Rhyolite Dome | FCT-NM (1C34-20) | 28.201           | 0.082 | Kuiper et al (2008) | 9.55461            | 0.155 | 0.00162492 | 0.155 | 298.269       | 0.116 | 1.0002442 | 0.039 | 1            | 3.54E-14               | 22  | SEP   | 2020 | 13   | 34  | 1      |
| 20F25078          | 0.7 %  | VS19-080 | Groundmass | Rhyolite Dome | FCT-NM (1C34-20) | 28.201           | 0.082 | Kuiper et al (2008) | 9.55461            | 0.155 | 0.00162492 | 0.155 | 298.269       | 0.116 | 1.0002442 | 0.039 | 1            | 3.54E-14               | 22  | SEP   | 2020 | 13   | 47  | 1      |
| 20F25080          | 0.9 %  | VS19-080 | Groundmass | Rhyolite Dome | FCT-NM (1C34-20) | 28.201           | 0.082 | Kuiper et al (2008) | 9.55461            | 0.155 | 0.00162492 | 0.155 | 298.269       | 0.116 | 1.0002442 | 0.039 | 1            | 3.54E-14               | 22  | SEP   | 2020 | 14   | 13  | 1      |
| 20F25081          | 1.1 %  | VS19-080 | Groundmass | Rhyolite Dome | FCT-NM (1C34-20) | 28.201           | 0.082 | Kuiper et al (2008) | 9.55461            | 0.155 | 0.00162492 | 0.155 | 298.269       | 0.116 | 1.0002442 | 0.039 | 1            | 3.54E-14               | 22  | SEP   | 2020 | 14   | 26  | 1      |
| 20F25083          | 1.3 %  | VS19-080 | Groundmass | Rhyolite Dome | FCT-NM (1C34-20) | 28.201           | 0.082 | Kuiper et al (2008) | 9.55461            | 0.155 | 0.00162492 | 0.155 | 298.269       | 0.116 | 1.0002442 | 0.039 | 1            | 3.54E-14               | 22  | SEP   | 2020 | 14   | 52  | 1      |
| 20F25084          | 1.5 %  | VS19-080 | Groundmass | Rhyolite Dome | FCT-NM (1C34-20) | 28.201           | 0.082 | Kuiper et al (2008) | 9.55461            | 0.155 | 0.00162492 | 0.155 | 298.269       | 0.116 | 1.0002442 | 0.039 | 1            | 3.54E-14               | 22  | SEP   | 2020 | 15   | 5   | 1      |
| 20F25086          | 1.8 %  | VS19-080 | Groundmass | Rhyolite Dome | FCT-NM (1C34-20) | 28.201           | 0.082 | Kuiper et al (2008) | 9.55461            | 0.155 | 0.00162492 | 0.155 | 298.269       | 0.116 | 1.0002442 | 0.039 | 1            | 3.54E-14               | 22  | SEP   | 2020 | 15   | 31  | 1      |
| 20F25087          | 2.2 %  | VS19-080 | Groundmass | Rhyolite Dome | FCT-NM (1C34-20) | 28.201           | 0.082 | Kuiper et al (2008) | 9.55461            | 0.155 | 0.00162492 | 0.155 | 298.269       | 0.116 | 1.0002442 | 0.039 | 1            | 3.54E-14               | 22  | SEP   | 2020 | 15   | 45  | 1      |
| 20F25089          | 2.6 %  | VS19-080 | Groundmass | Rhyolite Dome | FCT-NM (1C34-20) | 28.201           | 0.082 | Kuiper et al (2008) | 9.55461            | 0.155 | 0.00162492 | 0.155 | 298.269       | 0.116 | 1.0002442 | 0.039 | 1            | 3.54E-14               | 22  | SEP   | 2020 | 16   | 11  | 1      |
| 20F25090          | 3.1 %  | VS19-080 | Groundmass | Rhyolite Dome | FCT-NM (1C34-20) | 28.201           | 0.082 | Kuiper et al (2008) | 9.55461            | 0.155 | 0.00162492 | 0.155 | 298.269       | 0.116 | 1.0002442 | 0.039 | 1            | 3.54E-14               | 22  | SEP   | 2020 | 16   | 24  | 1      |
| 20F25091          | 3.6 %  | VS19-080 | Groundmass | Rhyolite Dome | FCT-NM (1C34-20) | 28.201           | 0.082 | Kuiper et al (2008) | 9.55461            | 0.155 | 0.00162492 | 0.155 | 298.269       | 0.116 | 1.0002442 | 0.039 | 1            | 3.54E-14               | 22  | SEP   | 2020 | 16   | 37  | 1      |
| 20F25093          | 4.1 %  | VS19-080 | Groundmass | Rhyolite Dome | FCT-NM (1C34-20) | 28.201           | 0.082 | Kuiper et al (2008) | 9.55461            | 0.155 | 0.00162492 | 0.155 | 298.269       | 0.116 | 1.0002442 | 0.039 | 1            | 3.54E-14               | 22  | SEP   | 2020 | 17   | 3   | 1      |
| 20F25094          | 4.7 %  | VS19-080 | Groundmass | Rhyolite Dome | FCT-NM (1C34-20) | 28.201           | 0.082 | Kuiper et al (2008) | 9.55461            | 0.155 | 0.00162492 | 0.155 | 298.269       | 0.116 | 1.0002442 | 0.039 | 1            | 3.54E-14               | 22  | SEP   | 2020 | 17   | 16  | 1      |
| 20F25095          | 5.3 %  | VS19-080 | Groundmass | Rhyolite Dome | FCT-NM (1C34-20) | 28.201           | 0.082 | Kuiper et al (2008) | 9.55461            | 0.155 | 0.00162492 | 0.155 | 298.269       | 0.116 | 1.0002442 | 0.039 | 1            | 3.54E-14               | 22  | SEP   | 2020 | 17   | 29  | 1      |
| 20F25097          | 6.0 %  | VS19-080 | Groundmass | Rhyolite Dome | FCT-NM (1C34-20) | 28.201           | 0.082 | Kuiper et al (2008) | 9.55461            | 0.155 | 0.00162492 | 0.155 | 298.269       | 0.116 | 1.0002442 | 0.039 | 1            | 3.54E-14               | 22  | SEP   | 2020 | 17   | 55  | 1      |
| 20F25098          | 6.8 %  | VS19-080 | Groundmass | Rhyolite Dome | FCT-NM (1C34-20) | 28.201           | 0.082 | Kuiper et al (2008) | 9.55461            | 0.155 | 0.00162492 | 0.155 | 298.269       | 0.116 | 1.0002442 | 0.039 | 1            | 3.54E-14               | 22  | SEP   | 2020 | 18   | 9   | 1      |
| 20F25099          | 7.5 %  | VS19-080 | Groundmass | Rhyolite Dome | FCT-NM (1C34-20) | 28.201           | 0.082 | Kuiper et al (2008) | 9.55461            | 0.155 | 0.00162492 | 0.155 | 298.269       | 0.116 | 1.0002442 | 0.039 | 1            | 3.54E-14               | 22  | SEP   | 2020 | 18   | 22  | 1      |
| 20F25101          | 8.3 %  | VS19-080 | Groundmass | Rhyolite Dome | FCT-NM (1C34-20) | 28.201           | 0.082 | Kuiper et al (2008) | 9.55461            | 0.155 | 0.00162492 | 0.155 | 298.269       | 0.116 | 1.0002442 | 0.039 | 1            | 3.54E-14               | 22  | SEP   | 2020 | 18   | 48  | 1      |
| 20F25102          | 9.1 %  | VS19-080 | Groundmass | Rhyolite Dome | FCT-NM (1C34-20) | 28.201           | 0.082 | Kuiper et al (2008) | 9.55461            | 0.155 | 0.00162492 | 0.155 | 298.269       | 0.116 | 1.0002442 | 0.039 | 1            | 3.54E-14               | 22  | SEP   | 2020 | 19   | 1   | 1      |
| 20F25103          | 10.1 % | VS19-080 | Groundmass | Rhyolite Dome | FCT-NM (1C34-20) | 28.201           | 0.082 | Kuiper et al (2008) | 9.55461            | 0.155 | 0.00162492 | 0.155 | 298.269       | 0.116 | 1.0002442 | 0.039 | 1            | 3.54E-14               | 22  | SEP   | 2020 | 19   | 14  | 1      |
| 20F25105          | 11.2 % | VS19-080 | Groundmass | Rhyolite Dome | FCT-NM (1C34-20) | 28.201           | 0.082 | Kuiper et al (2008) | 9.55461            | 0.155 | 0.00162492 | 0.155 | 298.269       | 0.116 | 1.0002442 | 0.039 | 1            | 3.54E-14               | 22  | SEP   | 2020 | 19   | 40  | 1      |
| 20F25106          | 12.4 % | VS19-080 | Groundmass | Rhyolite Dome | FCT-NM (1C34-20) | 28.201           | 0.082 | Kuiper et al (2008) | 9.55461            | 0.155 | 0.00162492 | 0.155 | 298.269       | 0.116 | 1.0002442 | 0.039 | 1            | 3.54E-14               | 22  | SEP   | 2020 | 19   | 53  | 1      |
| 20F25107          | 13.6 % | VS19-080 | Groundmass | Rhyolite Dome | FCT-NM (1C34-20) | 28.201           | 0.082 | Kuiper et al (2008) | 9.55461            | 0.155 | 0.00162492 | 0.155 | 298.269       | 0.116 | 1.0002442 | 0.039 | 1            | 3.54E-14               | 22  | SEP   | 2020 | 20   | 6   | 1      |
| 20F25109          | 14.9 % | VS19-080 | Groundmass | Rhyolite Dome | FCT-NM (1C34-20) | 28.201           | 0.082 | Kuiper et al (2008) | 9.55461            | 0.155 | 0.00162492 | 0.155 | 298.269       | 0.116 | 1.0002442 | 0.039 | 1            | 3.54E-14               | 22  | SEP   | 2020 | 20   | 33  | 1      |
| 20F25110          | 16.2 % | VS19-080 | Groundmass | Rhyolite Dome | FCT-NM (1C34-20) | 28.201           | 0.082 | Kuiper et al (2008) | 9.55461            | 0.155 | 0.00162492 | 0.155 | 298.269       | 0.116 | 1.0002442 | 0.039 | 1            | 3.54E-14               | 22  | SEP   | 2020 | 20   | 46  | 1      |
| 20F25111          | 17.6 % | VS19-080 | Groundmass | Rhyolite Dome | FCT-NM (1C34-20) | 28.201           | 0.082 | Kuiper et al (2008) | 9.55461            | 0.155 | 0.00162492 | 0.155 | 298.269       | 0.116 | 1.0002442 | 0.039 | 1            | 3.54E-14               | 22  | SEP   | 2020 | 20   | 59  | 1      |
| 20F25113          | 19.0 % | VS19-080 | Groundmass | Rhyolite Dome | FCT-NM (1C34-20) | 28.201           | 0.082 | Kuiper et al (2008) | 9.55461            | 0.155 | 0.00162492 | 0.155 | 298.269       | 0.116 | 1.0002442 | 0.039 | 1            | 3.54E-14               | 22  | SEP   | 2020 | 21   | 25  | 1      |
| 20F25114          | 20.5 % | VS19-080 | Groundmass | Rhyolite Dome | FCT-NM (1C34-20) | 28.201           | 0.082 | Kuiper et al (2008) | 9.55461            | 0.155 | 0.00162492 | 0.155 | 298.269       | 0.116 | 1.0002442 | 0.039 | 1            | 3.54E-14               | 22  | SEP   | 2020 | 21   | 38  | 1      |
| 20F25116          | 22.3 % | VS19-080 | Groundmass | Rhyolite Dome | FCT-NM (1C34-20) | 28.201           | 0.082 | Kuiper et al (2008) | 9.55461            | 0.155 | 0.00162492 | 0.155 | 298.269       | 0.116 | 1.0002442 | 0.039 | 1            | 3.54E-14               | 22  | SEP   | 2020 | 22   | 4   | 1      |

| Irradiation Constants |        | 40/36(a) | %1σ  | 40/36(c) | %1σ | 38/36(a) | %1σ   | 38/36(c) | %1σ | 39/37(ca) | %1σ  | 38/37(ca) | %1σ  | 36/37(ca) | %1σ  | 40/39(k) | %1σ  | 38/39(k) | %1σ  | 36/38(cl) | %1σ | K/Ca | %1σ | K/Cl | %1σ | Ca/Cl | %1σ |
|-----------------------|--------|----------|------|----------|-----|----------|-------|----------|-----|-----------|------|-----------|------|-----------|------|----------|------|----------|------|-----------|-----|------|-----|------|-----|-------|-----|
| 20F25072              | 0.3 %  | 332.12   | 1.07 | 0.018    | 35  | 0.1885   | 0.159 | 1.493    | 3   | 0.000643  | 0.92 | 0.00018   | 9.63 | 0.00027   | 0.17 | 0.000607 | 9.65 | 0.012077 | 0.09 | 0         | 0   | 0.43 | 0   | 0    | 0   | 0     | 0   |
| 20F25074              | 0.4 %  | 332.12   | 1.07 | 0.018    | 35  | 0.1885   | 0.159 | 1.493    | 3   | 0.000643  | 0.92 | 0.00018   | 9.63 | 0.00027   | 0.17 | 0.000607 | 9.65 | 0.012077 | 0.09 | 0         | 0   | 0.43 | 0   | 0    | 0   | 0     | 0   |
| 20F25075              | 0.5 %  | 332.12   | 1.07 | 0.018    | 35  | 0.1885   | 0.159 | 1.493    | 3   | 0.000643  | 0.92 | 0.00018   | 9.63 | 0.00027   | 0.17 | 0.000607 | 9.65 | 0.012077 | 0.09 | 0         | 0   | 0.43 | 0   | 0    | 0   | 0     | 0   |
| 20F25077              | 0.6 %  | 332.12   | 1.07 | 0.018    | 35  | 0.1885   | 0.159 | 1.493    | 3   | 0.000643  | 0.92 | 0.00018   | 9.63 | 0.00027   | 0.17 | 0.000607 | 9.65 | 0.012077 | 0.09 | 0         | 0   | 0.43 | 0   | 0    | 0   | 0     | 0   |
| 20F25078              | 0.7 %  | 332.12   | 1.07 | 0.018    | 35  | 0.1885   | 0.159 | 1.493    | 3   | 0.000643  | 0.92 | 0.00018   | 9.63 | 0.00027   | 0.17 | 0.000607 | 9.65 | 0.012077 | 0.09 | 0         | 0   | 0.43 | 0   | 0    | 0   | 0     | 0   |
| 20F25080              | 0.9 %  | 332.12   | 1.07 | 0.018    | 35  | 0.1885   | 0.159 | 1.493    | 3   | 0.000643  | 0.92 | 0.00018   | 9.63 | 0.00027   | 0.17 | 0.000607 | 9.65 | 0.012077 | 0.09 | 0         | 0   | 0.43 | 0   | 0    | 0   | 0     | 0   |
| 20F25081              | 1.1 %  | 332.12   | 1.07 | 0.018    | 35  | 0.1885   | 0.159 | 1.493    | 3   | 0.000643  | 0.92 | 0.00018   | 9.63 | 0.00027   | 0.17 | 0.000607 | 9.65 | 0.012077 | 0.09 | 0         | 0   | 0.43 | 0   | 0    | 0   | 0     | 0   |
| 20F25083              | 1.3 %  | 332.12   | 1.07 | 0.018    | 35  | 0.1885   | 0.159 | 1.493    | 3   | 0.000643  | 0.92 | 0.00018   | 9.63 | 0.00027   | 0.17 | 0.000607 | 9.65 | 0.012077 | 0.09 | 0         | 0   | 0.43 | 0   | 0    | 0   | 0     | 0   |
| 20F25084              | 1.5 %  | 332.12   | 1.07 | 0.018    | 35  | 0.1885   | 0.159 | 1.493    | 3   | 0.000643  | 0.92 | 0.00018   | 9.63 | 0.00027   | 0.17 | 0.000607 | 9.65 | 0.012077 | 0.09 | 0         | 0   | 0.43 | 0   | 0    | 0   | 0     | 0   |
| 20F25086              | 1.8 %  | 332.12   | 1.07 | 0.018    | 35  | 0.1885   | 0.159 | 1.493    | 3   | 0.000643  | 0.92 | 0.00018   | 9.63 | 0.00027   | 0.17 | 0.000607 | 9.65 | 0.012077 | 0.09 | 0         | 0   | 0.43 | 0   | 0    | 0   | 0     | 0   |
| 20F25087              | 2.2 %  | 332.12   | 1.07 | 0.018    | 35  | 0.1885   | 0.159 | 1.493    | 3   | 0.000643  | 0.92 | 0.00018   | 9.63 | 0.00027   | 0.17 | 0.000607 | 9.65 | 0.012077 | 0.09 | 0         | 0   | 0.43 | 0   | 0    | 0   | 0     | 0   |
| 20F25089              | 2.6 %  | 332.12   | 1.07 | 0.018    | 35  | 0.1885   | 0.159 | 1.493    | 3   | 0.000643  | 0.92 | 0.00018   | 9.63 | 0.00027   | 0.17 | 0.000607 | 9.65 | 0.012077 | 0.09 | 0         | 0   | 0.43 | 0   | 0    | 0   | 0     | 0   |
| 20F25090              | 3.1 %  | 332.12   | 1.07 | 0.018    | 35  | 0.1885   | 0.159 | 1.493    | 3   | 0.000643  | 0.92 | 0.00018   | 9.63 | 0.00027   | 0.17 | 0.000607 | 9.65 | 0.012077 | 0.09 | 0         | 0   | 0.43 | 0   | 0    | 0   | 0     | 0   |
| 20F25091              | 3.6 %  | 332.12   | 1.07 | 0.018    | 35  | 0.1885   | 0.159 | 1.493    | 3   | 0.000643  | 0.92 | 0.00018   | 9.63 | 0.00027   | 0.17 | 0.000607 | 9.65 | 0.012077 | 0.09 | 0         | 0   | 0.43 | 0   | 0    | 0   | 0     | 0   |
| 20F25093              | 4.1 %  | 332.12   | 1.07 | 0.018    | 35  | 0.1885   | 0.159 | 1.493    | 3   | 0.000643  | 0.92 | 0.00018   | 9.63 | 0.00027   | 0.17 | 0.000607 | 9.65 | 0.012077 | 0.09 | 0         | 0   | 0.43 | 0   | 0    | 0   | 0     | 0   |
| 20F25094              | 4.7 %  | 332.12   | 1.07 | 0.018    | 35  | 0.1885   | 0.159 | 1.493    | 3   | 0.000643  | 0.92 | 0.00018   | 9.63 | 0.00027   | 0.17 | 0.000607 | 9.65 | 0.012077 | 0.09 | 0         | 0   | 0.43 | 0   | 0    | 0   | 0     | 0   |
| 20F25095              | 5.3 %  | 332.12   | 1.07 | 0.018    | 35  | 0.1885   | 0.159 | 1.493    | 3   | 0.000643  | 0.92 | 0.00018   | 9.63 | 0.00027   | 0.17 | 0.000607 | 9.65 | 0.012077 | 0.09 | 0         | 0   | 0.43 | 0   | 0    | 0   | 0     | 0   |
| 20F25097              | 6.0 %  | 332.12   | 1.07 | 0.018    | 35  | 0.1885   | 0.159 | 1.493    | 3   | 0.000643  | 0.92 | 0.00018   | 9.63 | 0.00027   | 0.17 | 0.000607 | 9.65 | 0.012077 | 0.09 | 0         | 0   | 0.43 | 0   | 0    | 0   | 0     | 0   |
| 20F25098              | 6.8 %  | 332.12   | 1.07 | 0.018    | 35  | 0.1885   | 0.159 | 1.493    | 3   | 0.000643  | 0.92 | 0.00018   | 9.63 | 0.00027   | 0.17 | 0.000607 | 9.65 | 0.012077 | 0.09 | 0         | 0   | 0.43 | 0   | 0    | 0   | 0     | 0   |
| 20F25099              | 7.5 %  | 332.12   | 1.07 | 0.018    | 35  | 0.1885   | 0.159 | 1.493    | 3   | 0.000643  | 0.92 | 0.00018   | 9.63 | 0.00027   | 0.17 | 0.000607 | 9.65 | 0.012077 | 0.09 | 0         | 0   | 0.43 | 0   | 0    | 0   | 0     | 0   |
| 20F25101              | 8.3 %  | 332.12   | 1.07 | 0.018    | 35  | 0.1885   | 0.159 | 1.493    | 3   | 0.000643  | 0.92 | 0.00018   | 9.63 | 0.00027   | 0.17 | 0.000607 | 9.65 | 0.012077 | 0.09 | 0         | 0   | 0.43 | 0   | 0    | 0   | 0     | 0   |
| 20F25102              | 9.1 %  | 332.12   | 1.07 | 0.018    | 35  | 0.1885   | 0.159 | 1.493    | 3   | 0.000643  | 0.92 | 0.00018   | 9.63 | 0.00027   | 0.17 | 0.000607 | 9.65 | 0.012077 | 0.09 | 0         | 0   | 0.43 | 0   | 0    | 0   | 0     | 0   |
| 20F25103              | 10.1 % | 332.12   | 1.07 | 0.018    | 35  | 0.1885   | 0.159 | 1.493    | 3   | 0.000643  | 0.92 | 0.00018   | 9.63 | 0.00027   | 0.17 | 0.000607 | 9.65 | 0.012077 | 0.09 | 0         | 0   | 0.43 | 0   | 0    | 0   | 0     | 0   |
| 20F25105              | 11.2 % | 332.12   | 1.07 | 0.018    | 35  | 0.1885   | 0.159 | 1.493    | 3   | 0.000643  | 0.92 | 0.00018   | 9.63 | 0.00027   | 0.17 | 0.000607 | 9.65 | 0.012077 | 0.09 | 0         | 0   | 0.43 | 0   | 0    | 0   | 0     | 0   |
| 20F25106              | 12.4 % | 332.12   | 1.07 | 0.018    | 35  | 0.1885   | 0.159 | 1.493    | 3   | 0.000643  | 0.92 | 0.00018   | 9.63 | 0.00027   | 0.17 | 0.000607 | 9.65 | 0.012077 | 0.09 | 0         | 0   | 0.43 | 0   | 0    | 0   | 0     | 0   |
| 20F25107              | 13.6 % | 332.12   | 1.07 | 0.018    | 35  | 0.1885   | 0.159 | 1.493    | 3   | 0.000643  | 0.92 | 0.00018   | 9.63 | 0.00027   | 0.17 | 0.000607 | 9.65 | 0.012077 | 0.09 | 0         | 0   | 0.43 | 0   | 0    | 0   | 0     | 0   |
| 20F25109              | 14.9 % | 332.12   | 1.07 | 0.018    | 35  | 0.1885   | 0.159 | 1.493    | 3   | 0.000643  | 0.92 | 0.00018   | 9.63 | 0.00027   | 0.17 | 0.000607 | 9.65 | 0.012077 | 0.09 | 0         | 0   | 0.43 | 0   | 0    | 0   | 0     | 0   |
| 20F25110              | 16.2 % | 332.12   | 1.07 | 0.018    | 35  | 0.1885   | 0.159 | 1.493    | 3   | 0.000643  | 0.92 | 0.00018   | 9.63 | 0.00027   | 0.17 | 0.000607 | 9.65 | 0.012077 | 0.09 | 0         | 0   | 0.43 | 0   | 0    | 0   | 0     | 0   |
| 20F25111              | 17.6 % | 332.12   | 1.07 | 0.018    | 35  | 0.1885   | 0.159 | 1.493    | 3   | 0.000643  | 0.92 | 0.00018   | 9.63 | 0.00027   | 0.17 | 0.000607 | 9.65 | 0.012077 | 0.09 | 0         | 0   | 0.43 | 0   | 0    | 0   | 0     | 0   |
| 20F25113              | 19.0 % | 332.12   | 1.07 | 0.018    | 35  | 0.1885   | 0.159 | 1.493    | 3   | 0.000643  | 0.92 | 0.00018   | 9.63 | 0.00027   | 0.17 | 0.000607 | 9.65 | 0.012077 | 0.09 | 0         | 0   | 0.43 | 0   | 0    | 0   | 0     | 0   |
| 20F25114              | 20.5 % | 332.12   | 1.07 | 0.018    | 35  | 0.1885   | 0.159 | 1.493    | 3   | 0.000643  | 0.92 | 0.00018   | 9.63 | 0.00027   | 0.17 | 0.000607 | 9.65 | 0.012077 | 0.09 | 0         | 0   | 0.43 | 0   | 0    | 0   | 0     | 0   |
| 20F25116              | 22.3 % | 332.12   | 1.07 | 0.018    | 35  | 0.1885   | 0.159 | 1.493    | 3   | 0.000643  | 0.92 | 0.00018   | 9.63 | 0.00027   | 0.17 | 0.000607 | 9.65 | 0.012077 | 0.09 | 0         | 0   | 0.43 | 0   | 0    | 0   | 0     | 0   |

20F25068.AGE >>> VS19-080 >>> OREGON | SW

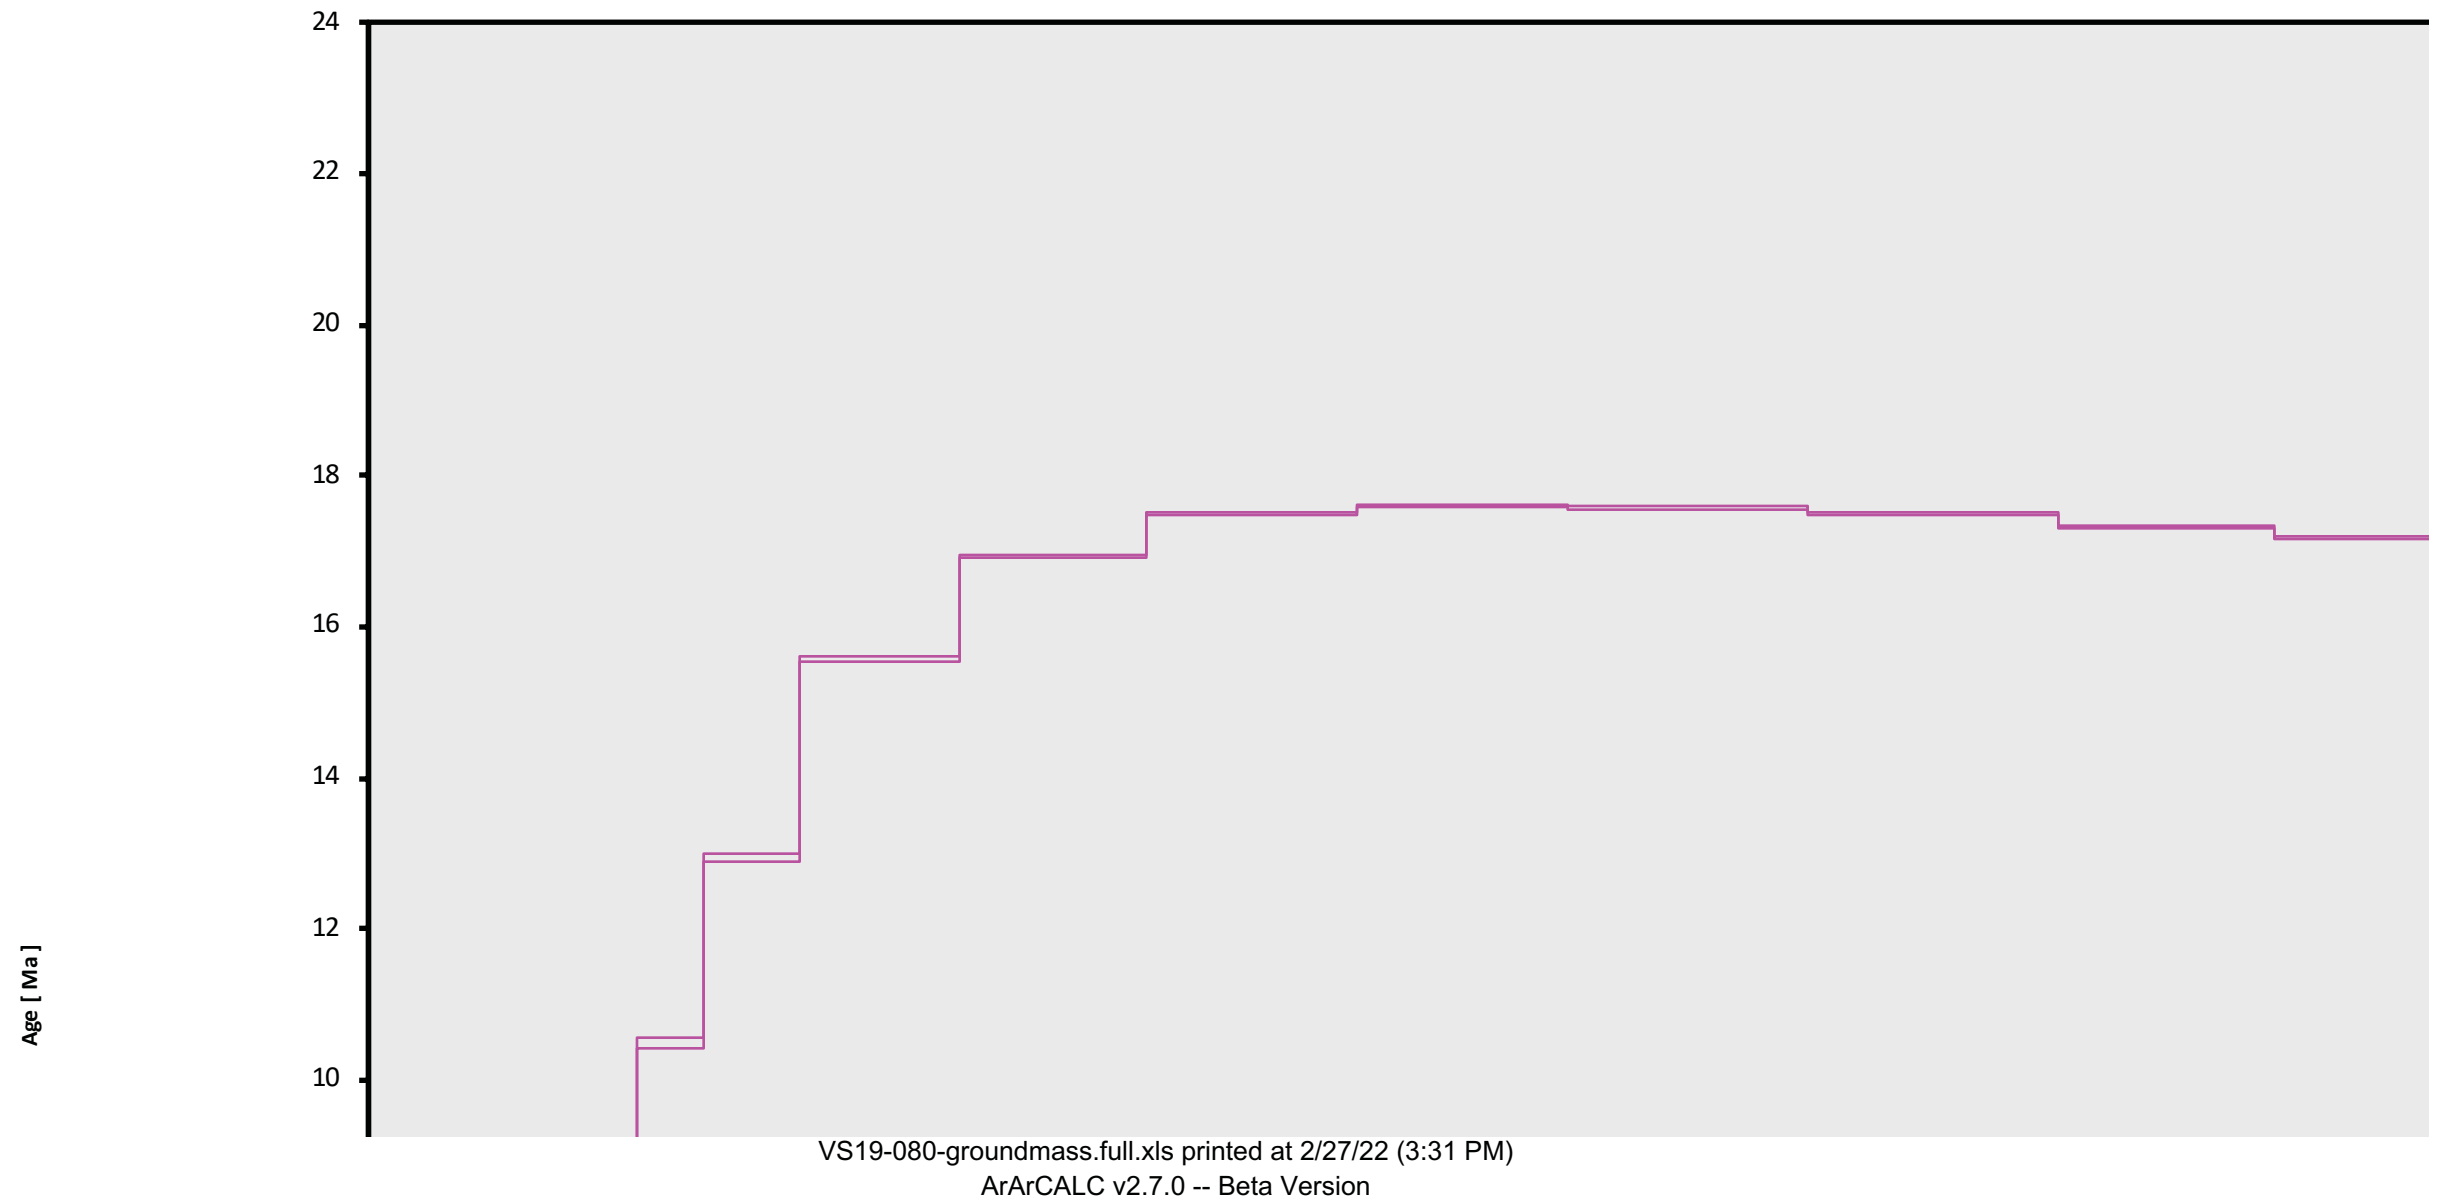

20F25068.AGE >>> VS19-080 >>> OREGON | SWENTON (20-01) PROJECT

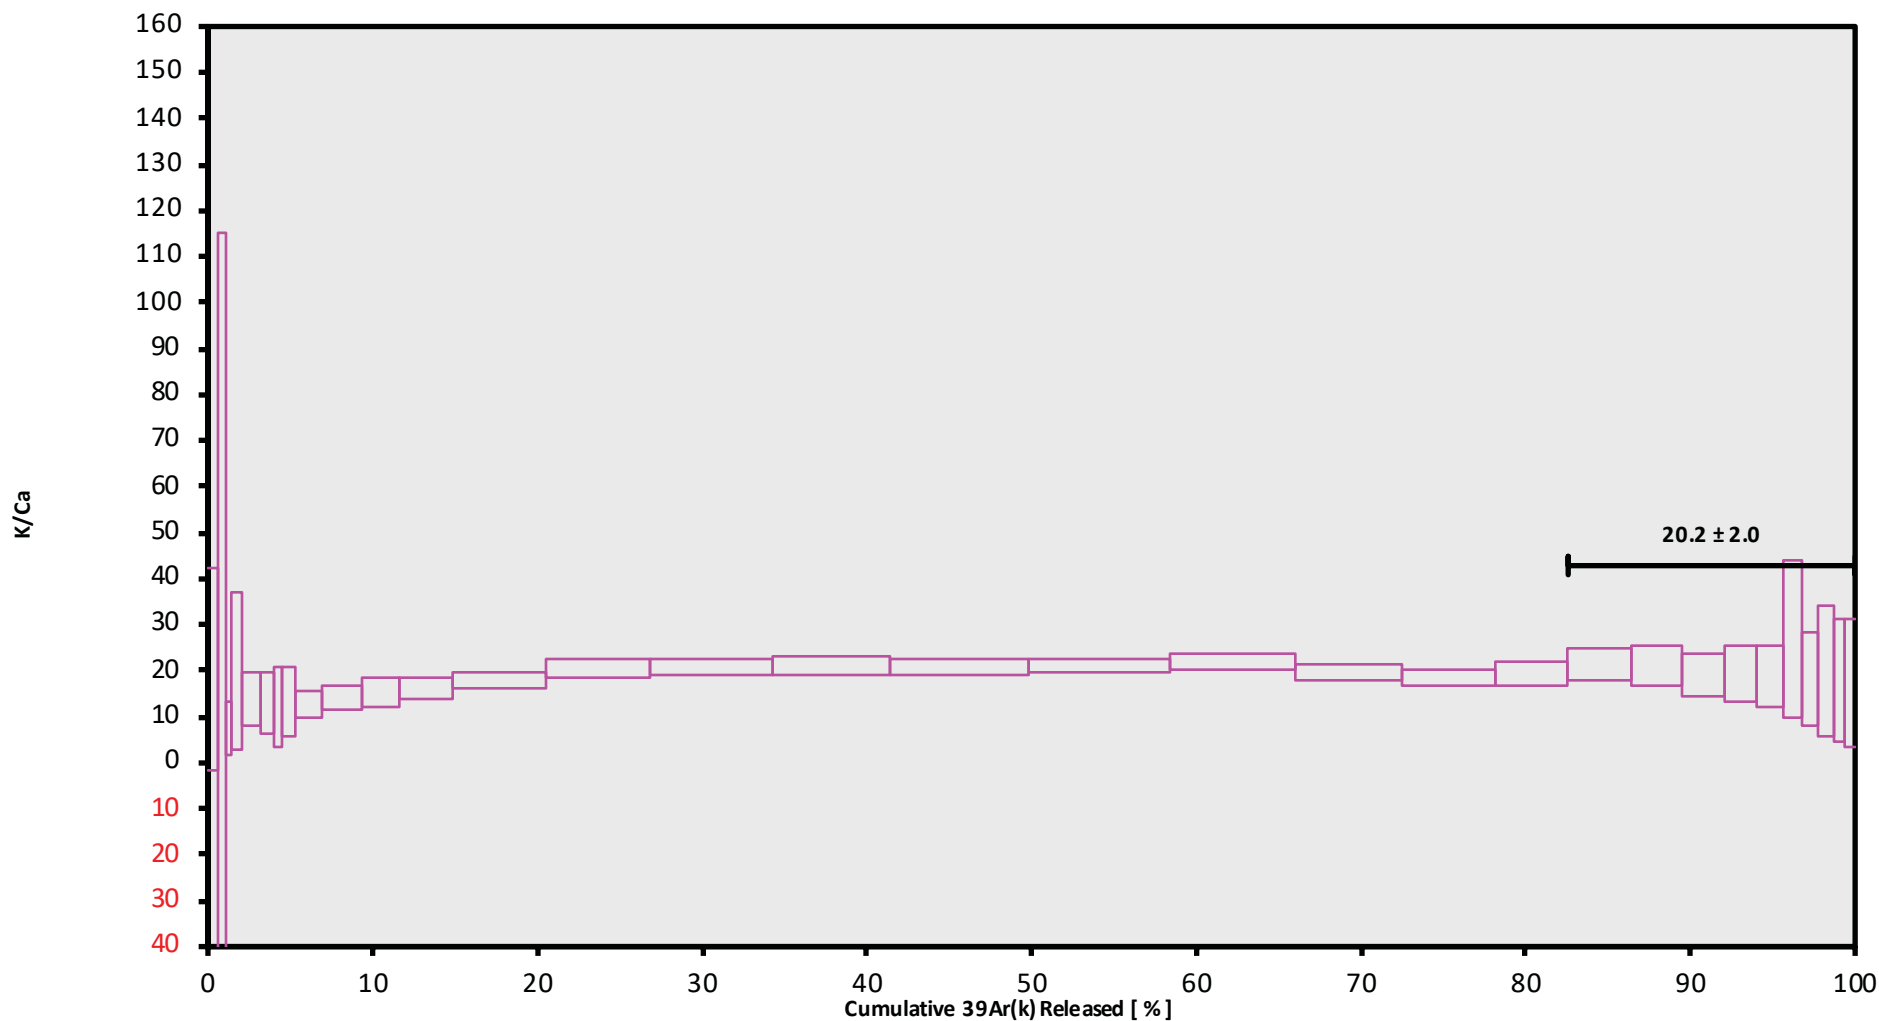

Ar-Ages in Ma

**WEIGHTED PLATEAU**  
 $16.81 \pm 0.05$   
**TOTAL FUSION**  
 $15.64 \pm 0.05$   
**NORMAL ISOCHRON**  
 $16.79 \pm 0.06$   
**INVERSE ISOCHRON**  
 $16.79 \pm 0.06$

Sample Info

Groundmass  
Rhyolite Dome  
Dan Miggins

20F25068.AGE >>> VS19-080 >>> OREGON | SWENTON (20-01) PROJECT

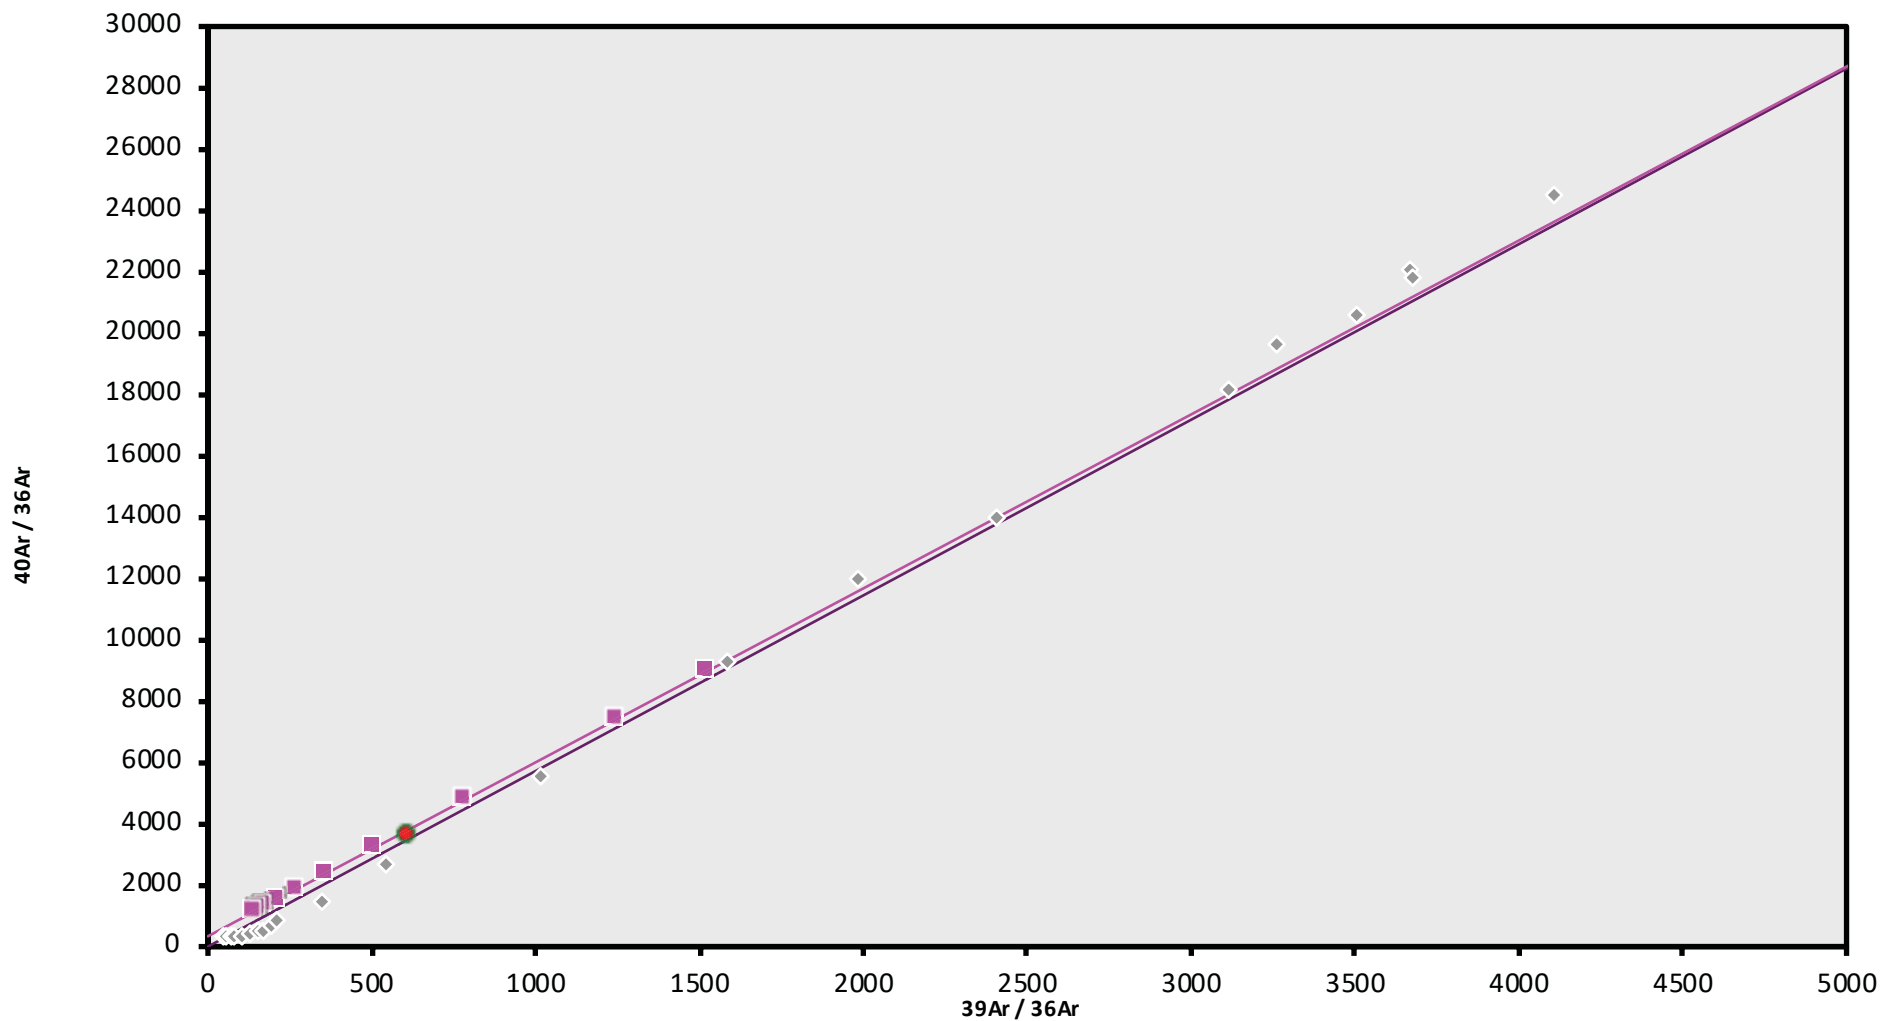

Ar-Ages in Ma

WEIGHTED PLATEAU

16.81 ± 0.05

TOTAL FUSION

15.64 ± 0.05

NORMAL ISOCHRON

16.79 ± 0.06

INVERSE ISOCHRON

16.79 ± 0.06

MSWD (PROBABILITY)

1.64 (11%)

Sample Info

Groundmass

Rhyolite Dome

Dan Miggins

20F25068.AGE >>> VS19-080 >>> OREGON | SWENTON (20-01) PROJECT

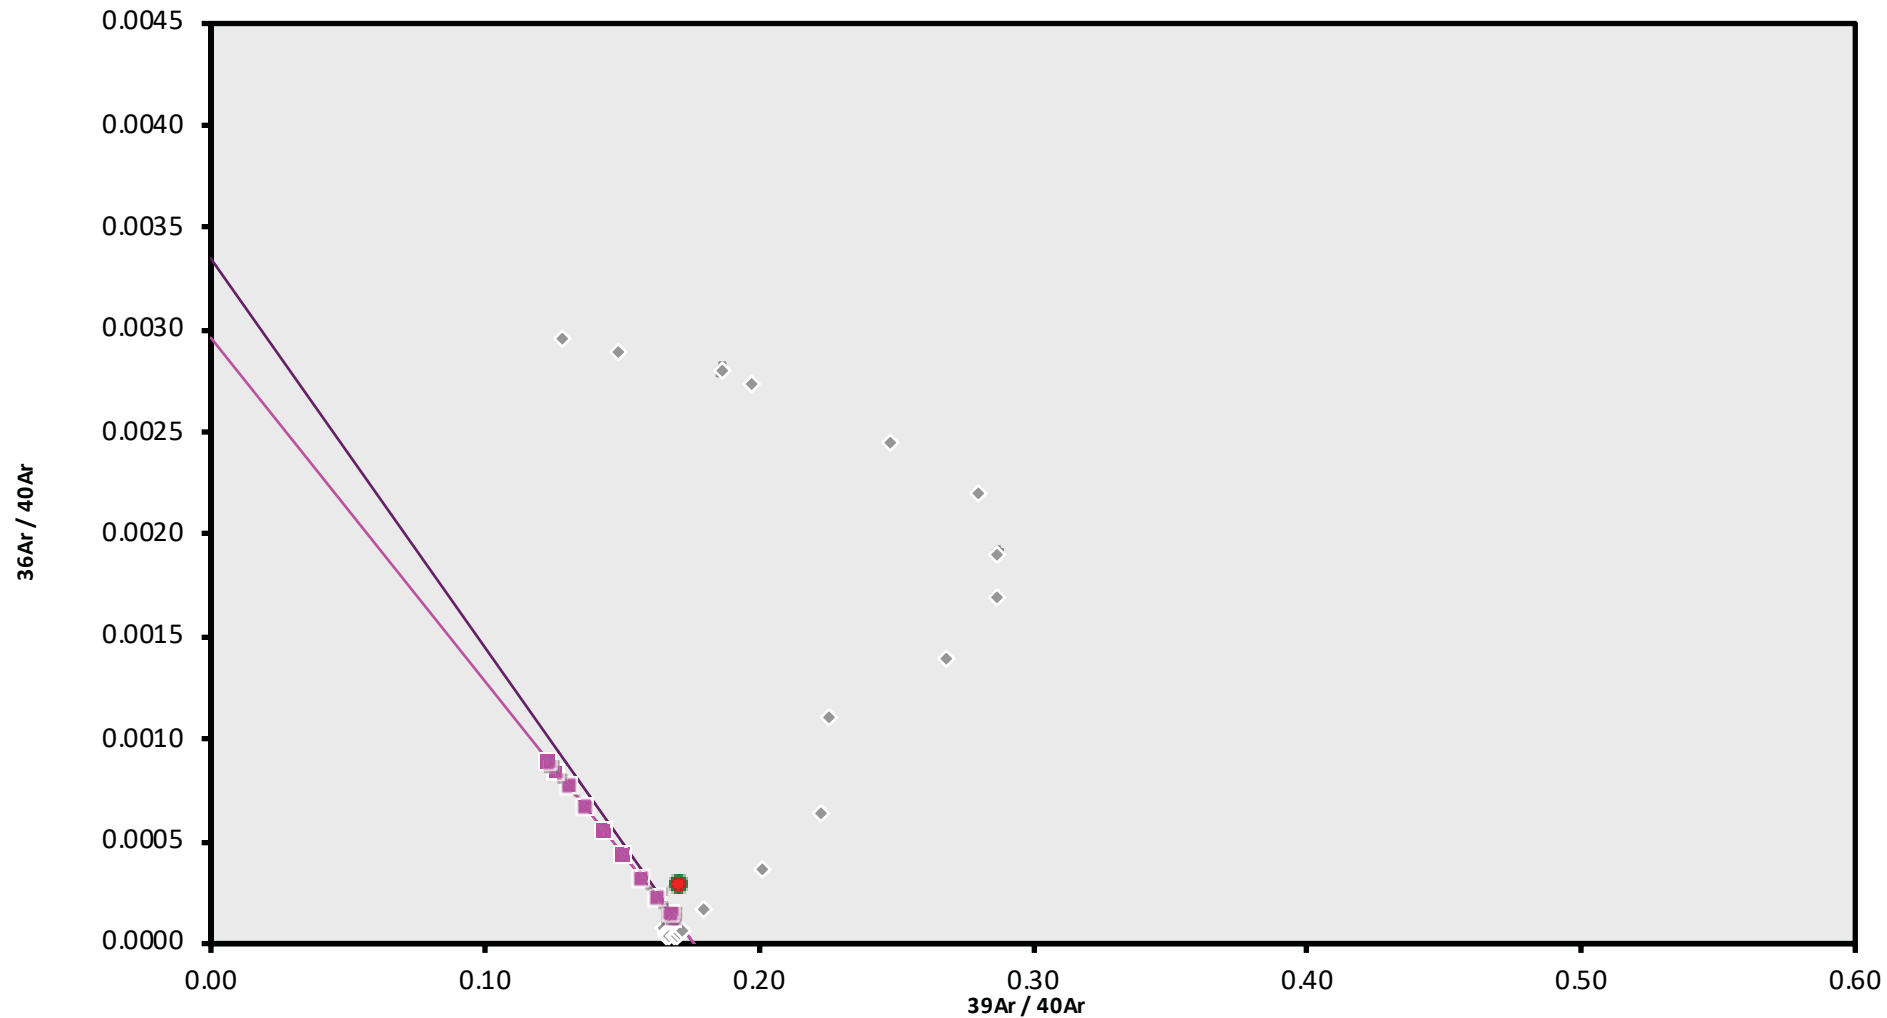

## Ar-Ages in Ma

## WEIGHTED PLATEAU

**16.81 ± 0.05**

## TOTAL FUSION

**15.64 ± 0.05**

## NORMAL ISOCHRON

**16.79 ± 0.06**

## INVERSE ISOCHRON

**16.79 ± 0.06**

MSWD (PROBABILITY)

**1.62 (11%)**

## Sample Info

## Groundmass

## Rhyolite Dome

## Dan Miggins

| Relative Abundances |        | 36Ar<br>[fA] | %1σ    | 37Ar<br>[fA] | %1σ    | 38Ar<br>[fA] | %1σ    | 39Ar<br>[fA] | %1σ   | 40Ar<br>[fA] | %1σ   | 40(r)/39(k) ± 2σ  | Age ± 2σ<br>(Ma) | 40Ar(r)<br>(%) | 39Ar(k)<br>(%) | K/Ca ± 2σ     |
|---------------------|--------|--------------|--------|--------------|--------|--------------|--------|--------------|-------|--------------|-------|-------------------|------------------|----------------|----------------|---------------|
| 21F16571            | 24.0 % | 0.0063089    | 5.949  | 11.82750     | 0.445  | 0.073166     | 12.580 | 4.3157       | 0.212 | 15.8115      | 0.137 | 3.45406 ± 0.05501 | 10.41 ± 0.17     | 94.11          | 0.27           | 0.16 ± 0.00   |
| 21F16572            | 24.0 % | 0.0473488    | 1.160  | 14.76716     | 0.395  | 0.136738     | 6.556  | 4.9948       | 0.182 | 29.5634      | 0.088 | 3.33344 ± 0.06798 | 10.04 ± 0.20     | 56.21          | 0.31           | 0.15 ± 0.00   |
| 21F16574            | 24.0 % | 0.0102948    | 3.825  | 14.01672     | 0.415  | 0.074916     | 12.381 | 5.2600       | 0.184 | 20.0304      | 0.115 | 3.44413 ± 0.04740 | 10.38 ± 0.14     | 90.29          | 0.33           | 0.16 ± 0.00   |
| 21F16575            | 24.0 % | 0.0212315    | 2.097  | 20.38681     | 0.337  | 0.088346     | 10.371 | 6.8821       | 0.144 | 28.2408      | 0.077 | 3.42743 ± 0.04052 | 10.33 ± 0.12     | 83.37          | 0.43           | 0.14 ± 0.00   |
| 21F16577            | 24.0 % | 0.0120319    | 3.392  | 7.16811      | 0.704  | 0.043329     | 21.413 | 2.4511       | 0.378 | 11.0210      | 0.217 | 3.27248 ± 0.10458 | 9.86 ± 0.31      | 72.64          | 0.15           | 0.15 ± 0.00   |
| 21F16578            | 24.0 % | 0.0105422    | 3.978  | 23.76191     | 0.317  | 0.125970     | 8.106  | 7.8896       | 0.121 | 28.7724      | 0.086 | 3.49730 ± 0.03356 | 10.54 ± 0.10     | 95.71          | 0.49           | 0.14 ± 0.00   |
| 21F16580            | 24.0 % | ✓ 0.0148360  | 2.549  | 2.08362      | 2.146  | 0.649702     | 1.518  | 52.0821      | 0.045 | 195.0182     | 0.015 | 3.66212 ± 0.00554 | 11.03 ± 0.02     | 97.80          | 3.26           | 10.75 ± 0.46  |
| 21F16581            | 24.0 % | ✓ 0.0149799  | 2.714  | 1.33545      | 3.307  | 2.128665     | 0.472  | 176.2751     | 0.039 | 621.8095     | 0.006 | 3.50214 ± 0.00311 | 10.55 ± 0.01     | 99.28          | 11.05          | 56.76 ± 3.75  |
| 21F16583            | 24.0 % | ✓ 0.0729859  | 0.812  | 0.77442      | 5.825  | 1.615059     | 0.584  | 129.8906     | 0.040 | 476.6796     | 0.007 | 3.50199 ± 0.00397 | 10.55 ± 0.01     | 95.43          | 8.14           | 72.12 ± 8.40  |
| 21F16584            | 24.0 % | 0.0338966    | 1.405  | 20.87160     | 0.343  | 0.107198     | 8.642  | 6.9724       | 0.143 | 33.2811      | 0.078 | 3.56974 ± 0.04290 | 10.75 ± 0.13     | 74.64          | 0.44           | 0.14 ± 0.00   |
| 21F16586            | 24.0 % | 0.0137150    | 3.267  | 29.33878     | 0.302  | 0.151724     | 6.192  | 10.3902      | 0.102 | 38.3651      | 0.062 | 3.53208 ± 0.02723 | 10.64 ± 0.08     | 95.48          | 0.65           | 0.15 ± 0.00   |
| 21F16587            | 24.0 % | ✓ 0.0145216  | 2.713  | 9.40101      | 0.521  | 1.514937     | 0.622  | 126.4214     | 0.040 | 445.9495     | 0.008 | 3.49875 ± 0.00342 | 10.54 ± 0.01     | 99.18          | 7.92           | 5.78 ± 0.06   |
| 21F16589            | 24.0 % | 0.1954415    | 0.384  | 15.23535     | 0.364  | 0.081920     | 11.753 | 3.5276       | 0.271 | 68.7575      | 0.034 | 3.30717 ± 0.13362 | 9.97 ± 0.40      | 16.92          | 0.22           | 0.10 ± 0.00   |
| 21F16590            | 24.0 % | 0.0113015    | 3.390  | 23.56512     | 0.315  | 0.100263     | 9.726  | 6.7959       | 0.138 | 25.2138      | 0.093 | 3.50073 ± 0.03584 | 10.55 ± 0.11     | 94.15          | 0.42           | 0.12 ± 0.00   |
| 21F16592            | 24.0 % | 0.0074729    | 5.304  | 12.69306     | 0.439  | 0.054195     | 16.592 | 4.3833       | 0.220 | 16.4051      | 0.145 | 3.47319 ± 0.05732 | 10.46 ± 0.17     | 92.63          | 0.27           | 0.15 ± 0.00   |
| 21F16593            | 24.0 % | ✓ 0.0061441  | 6.290  | 5.96068      | 0.794  | 0.218743     | 4.209  | 16.0024      | 0.075 | 57.2036      | 0.042 | 3.49040 ± 0.01565 | 10.52 ± 0.05     | 97.62          | 1.00           | 1.15 ± 0.02   |
| 21F16595            | 24.0 % | ✓ 0.0142509  | 49.430 | 0.49551      | 9.264  | 0.971761     | 0.944  | 78.9578      | 0.045 | 279.7111     | 0.010 | 3.48857 ± 0.05337 | 10.51 ± 0.16     | 98.48          | 4.95           | 68.52 ± 12.70 |
| 21F16596            | 24.0 % | ✓ 0.0229204  | 30.748 | 1.35854      | 3.272  | 2.331013     | 0.388  | 193.3683     | 0.040 | 682.8311     | 0.006 | 3.49583 ± 0.02194 | 10.53 ± 0.07     | 99.00          | 12.12          | 61.20 ± 4.01  |
| 21F16598            | 24.0 % | ✓ 0.0084418  | 4.800  | 1.36617      | 3.174  | 2.222836     | 0.447  | 182.9757     | 0.040 | 642.1144     | 0.006 | 3.49553 ± 0.00310 | 10.53 ± 0.01     | 99.61          | 11.47          | 57.59 ± 3.66  |
| 21F16599            | 24.0 % | 0.0202567    | 2.094  | 40.14255     | 0.283  | 0.176119     | 4.897  | 14.2686      | 0.079 | 52.6236      | 0.041 | 3.49698 ± 0.01894 | 10.54 ± 0.06     | 94.65          | 0.89           | 0.15 ± 0.00   |
| 21F16601            | 24.0 % | ✓ 0.0014728  | 28.348 | 1.06653      | 4.121  | 1.616481     | 0.603  | 128.8781     | 0.040 | 451.8105     | 0.008 | 3.50240 ± 0.00347 | 10.55 ± 0.01     | 99.90          | 8.08           | 51.96 ± 4.28  |
| 21F16602            | 24.0 % | 0.0122605    | 3.311  | 12.90751     | 0.423  | 0.092455     | 10.437 | 5.1419       | 0.181 | 20.6078      | 0.112 | 3.50375 ± 0.04975 | 10.56 ± 0.15     | 87.28          | 0.32           | 0.17 ± 0.00   |
| 21F16604            | 24.0 % | 0.0176983    | 2.551  | 19.56105     | 0.351  | 0.133856     | 6.897  | 6.3370       | 0.154 | 25.3700      | 0.097 | 3.42526 ± 0.04465 | 10.32 ± 0.13     | 85.39          | 0.40           | 0.14 ± 0.00   |
| 21F16605            | 24.0 % | 0.0230955    | 1.867  | 15.69611     | 0.375  | 0.058032     | 15.559 | 5.3075       | 0.185 | 24.0833      | 0.098 | 3.48309 ± 0.05115 | 10.49 ± 0.15     | 76.61          | 0.33           | 0.15 ± 0.00   |
| 21F16607            | 24.0 % | ✓ 0.0029899  | 12.887 | 0.48679      | 9.188  | 0.946344     | 0.932  | 77.7458      | 0.042 | 272.9217     | 0.011 | 3.49887 ± 0.00423 | 10.54 ± 0.01     | 99.67          | 4.87           | 68.68 ± 12.62 |
| 21F16608            | 24.0 % | ✓ 0.0054021  | 6.838  | 0.39091      | 11.049 | 0.759923     | 1.269  | 62.1413      | 0.043 | 219.4106     | 0.015 | 3.50480 ± 0.00477 | 10.56 ± 0.01     | 99.26          | 3.89           | 68.36 ± 15.11 |
| 21F16610            | 24.0 % | ✓ 0.0213499  | 1.905  | 2.77124      | 1.601  | 1.697648     | 0.580  | 139.2381     | 0.040 | 493.9007     | 0.008 | 3.50244 ± 0.00333 | 10.55 ± 0.01     | 98.74          | 8.73           | 21.60 ± 0.69  |
| 21F16611            | 24.0 % | 0.0063082    | 5.411  | 13.00353     | 0.419  | 0.058828     | 15.639 | 4.4253       | 0.217 | 15.9295      | 0.142 | 3.41710 ± 0.04959 | 10.30 ± 0.15     | 94.75          | 0.28           | 0.15 ± 0.00   |
| 21F16613            | 24.0 % | 0.0251707    | 1.652  | 11.78858     | 0.495  | 0.070789     | 13.040 | 3.7510       | 0.252 | 19.6427      | 0.111 | 3.49348 ± 0.06978 | 10.53 ± 0.21     | 66.58          | 0.23           | 0.14 ± 0.00   |
| 21F16614            | 24.0 % | ✓ 0.0111113  | 3.480  | 1.02303      | 4.103  | 1.575049     | 0.594  | 128.6824     | 0.040 | 453.5821     | 0.007 | 3.49910 ± 0.00336 | 10.54 ± 0.01     | 99.27          | 8.07           | 54.09 ± 4.44  |
| Σ                   |        | 0.6857820    | 1.492  | 335.24535    | 0.096  | 19.876006    | 0.259  | 1595.7530    | 0.012 | 5766.6618    | 0.003 |                   |                  |                |                |               |

| Information on Analysis<br>and Constants Used in Calculations                                                                                                                                                                                                                                                                                                                                                                                                                                                                                                                                                                                                                                                                                                                                                                                                                                                                                                                                                                   | Results                                                                                                                                                                                                                         | 40(a)/36(a) ± 2σ         | 40(r)/39(k) ± 2σ                                                                   | Age ± 2σ<br>(Ma)     | MSWD                                                   | 39Ar(k)<br>(%,n)                                                                                                     | K/Ca ± 2σ     |
|---------------------------------------------------------------------------------------------------------------------------------------------------------------------------------------------------------------------------------------------------------------------------------------------------------------------------------------------------------------------------------------------------------------------------------------------------------------------------------------------------------------------------------------------------------------------------------------------------------------------------------------------------------------------------------------------------------------------------------------------------------------------------------------------------------------------------------------------------------------------------------------------------------------------------------------------------------------------------------------------------------------------------------|---------------------------------------------------------------------------------------------------------------------------------------------------------------------------------------------------------------------------------|--------------------------|------------------------------------------------------------------------------------|----------------------|--------------------------------------------------------|----------------------------------------------------------------------------------------------------------------------|---------------|
| Project = <b>SWENTON (20-01)</b><br>Sample = <b>VS19-085</b><br>Material = <b>Sanidine</b><br>Location = <b>Circle Bar</b><br>Region = <b>Eastern Oregon</b><br>Analyst = <b>Dan Miggins</b><br>Irradiation = <b>21-OSU-04 (4X12-21)</b><br>Position = <b>X: 0   Y: 0   Z/H: 12.29555 mm</b><br>FCT-NM Age = <b>28.201 ± 0.023 Ma</b><br>FCT-NM Reference = <b>Kuiper et al (2008)</b><br>FCT-NM 40Ar/39Ar Ratio = <b>9.40558 ± 0.01063</b><br>FCT-NM J-value = <b>0.00165067 ± 0.00000187</b><br>Air Shot 40Ar/36Ar = <b>300.9210 ± 0.3370</b><br>Air Shot MDF = <b>0.99803599 ± 0.00037959 (LIN)</b><br>Experiment Type = <b>Total Fusion</b><br>Extraction Method = <b>Single Crystal Laser Heating</b><br>Heating = <b>62 sec</b><br>Isolation = <b>1.50 min</b><br>Instrument = <b>ARGUS-VI-F</b><br>Preferred Age = <b>Ideogram Age</b><br>Age Classification = <b>Eruption Age</b><br>IGSN = <b>Undefined</b><br>Rock Class = <b>Undefined</b><br>Lithology = <b>Undefined</b><br>Lat-Lon = <b>Undefined - Undefined</b> | <b>Age Plateau</b><br><b>Error Mean</b><br><br><br><br><br><br><b>Total Fusion Age</b><br><br><br><br><br><br><b>Normal Isochron</b><br><b>Error Chron</b><br><br><br><br><br><br><b>Inverse Isochron</b><br><b>Error Chron</b> |                          | 3.50725 ± 0.01901 ± 0.54%<br>Full External Error ± 0.55<br>Analytical Error ± 0.06 | 10.57 ± 0.06 ± 0.59% | > 100<br>0%<br>1.82<br>> 10                            | 93.55<br>13<br>2σ Confidence Limit<br>Error Magnification                                                            | 46.04 ± 14.55 |
|                                                                                                                                                                                                                                                                                                                                                                                                                                                                                                                                                                                                                                                                                                                                                                                                                                                                                                                                                                                                                                 |                                                                                                                                                                                                                                 |                          | 3.50228 ± 0.00392 ± 0.11%<br>Full External Error ± 0.55<br>Analytical Error ± 0.01 | 10.55 ± 0.03 ± 0.25% |                                                        | 30                                                                                                                   | 2.05 ± 0.00   |
|                                                                                                                                                                                                                                                                                                                                                                                                                                                                                                                                                                                                                                                                                                                                                                                                                                                                                                                                                                                                                                 |                                                                                                                                                                                                                                 | 305.74 ± 60.57 ± 19.81%  | 3.50163 ± 0.01120 ± 0.32%                                                          | 10.55 ± 0.04 ± 0.39% | 55.52<br>0%<br>1.85<br>7.4512<br>0.0000000473          | 93.55<br>13<br>2σ Confidence Limit<br>Error Magnification<br>Number of Iterations<br>Convergence                     |               |
|                                                                                                                                                                                                                                                                                                                                                                                                                                                                                                                                                                                                                                                                                                                                                                                                                                                                                                                                                                                                                                 |                                                                                                                                                                                                                                 | 439.56 ± 149.03 ± 33.90% | 3.48924 ± 0.02500 ± 0.72%                                                          | 10.51 ± 0.08 ± 0.75% | > 100<br>0%<br>1.85<br>> 10<br>5<br>0.0001447408<br>6% | 93.55<br>13<br>2σ Confidence Limit<br>Error Magnification<br>Number of Iterations<br>Convergence<br>Spreading Factor |               |



| Incremental Heating |        | 36Ar(a)<br>[fA] | 37Ar(ca)<br>[fA] | 38Ar(cl)<br>[fA] | 39Ar(k)<br>[fA] | 40Ar(r)<br>[fA] | Age ± 2σ<br>(Ma) | 40Ar(r)<br>(%) | 39Ar(k)<br>(%) | K/Ca ± 2σ     |
|---------------------|--------|-----------------|------------------|------------------|-----------------|-----------------|------------------|----------------|----------------|---------------|
| 21F16571            | 24.0 % | 0.0031095       | 11.82750         | 0.0184220        | 4.3081          | 14.8805         | 10.41 ± 0.17     | 94.11          | 0.27           | 0.16 ± 0.00   |
| 21F16572            | 24.0 % | 0.0433486       | 14.76716         | 0.0657014        | 4.9853          | 16.6182         | 10.04 ± 0.20     | 56.21          | 0.31           | 0.15 ± 0.00   |
| 21F16574            | 24.0 % | 0.0065051       | 14.01672         | 0.0077506        | 5.2510          | 18.0851         | 10.38 ± 0.14     | 90.29          | 0.33           | 0.16 ± 0.00   |
| 21F16575            | 24.0 % | 0.0157210       | 20.38681         | 0.0000000        | 6.8690          | 23.5430         | 10.33 ± 0.12     | 83.37          | 0.43           | 0.14 ± 0.00   |
| 21F16577            | 24.0 % | 0.0100930       | 7.16811          | 0.0105900        | 2.4465          | 8.0061          | 9.86 ± 0.31      | 72.64          | 0.15           | 0.15 ± 0.00   |
| 21F16578            | 24.0 % | 0.0041159       | 23.76191         | 0.0258197        | 7.8743          | 27.5387         | 10.54 ± 0.10     | 95.71          | 0.49           | 0.14 ± 0.00   |
| 21F16580            | 24.0 % | ✓ 0.0142705     | 2.08362          | 0.0176576        | 52.0808         | 190.7260        | 11.03 ± 0.02     | 97.80          | 3.26           | 10.75 ± 0.46  |
| 21F16581            | 24.0 % | ✓ 0.0146189     | 1.33545          | 0.0000000        | 176.2743        | 617.3379        | 10.55 ± 0.01     | 99.28          | 11.05          | 56.76 ± 3.75  |
| 21F16583            | 24.0 % | ✓ 0.0727723     | 0.77442          | 0.0325194        | 129.8901        | 454.8739        | 10.55 ± 0.01     | 95.43          | 8.14           | 72.12 ± 8.40  |
| 21F16584            | 24.0 % | 0.0282531       | 20.87160         | 0.0140718        | 6.9590          | 24.8417         | 10.75 ± 0.13     | 74.64          | 0.44           | 0.14 ± 0.00   |
| 21F16586            | 24.0 % | 0.0057821       | 29.33878         | 0.0200983        | 10.3714         | 36.6325         | 10.64 ± 0.08     | 95.48          | 0.65           | 0.15 ± 0.00   |
| 21F16587            | 24.0 % | ✓ 0.0119805     | 9.40101          | 0.0000000        | 126.4153        | 442.2958        | 10.54 ± 0.01     | 99.18          | 7.92           | 5.78 ± 0.06   |
| 21F16589            | 24.0 % | 0.1913233       | 15.23535         | 0.0006291        | 3.5178          | 11.6339         | 9.97 ± 0.40      | 16.92          | 0.22           | 0.10 ± 0.00   |
| 21F16590            | 24.0 % | 0.0049301       | 23.56512         | 0.0132004        | 6.7808          | 23.7377         | 10.55 ± 0.11     | 94.15          | 0.42           | 0.12 ± 0.00   |
| 21F16592            | 24.0 % | 0.0040420       | 12.69306         | 0.0000000        | 4.3751          | 15.1957         | 10.46 ± 0.17     | 92.63          | 0.27           | 0.15 ± 0.00   |
| 21F16593            | 24.0 % | ✓ 0.0045299     | 5.96068          | 0.0236012        | 15.9986         | 55.8415         | 10.52 ± 0.05     | 97.62          | 1.00           | 1.15 ± 0.02   |
| 21F16595            | 24.0 % | ✓ 0.0141149     | 0.49551          | 0.0154414        | 78.9575         | 275.4490        | 10.51 ± 0.16     | 98.48          | 4.95           | 68.52 ± 12.70 |
| 21F16596            | 24.0 % | ✓ 0.0225532     | 1.35854          | 0.0000000        | 193.3674        | 675.9803        | 10.53 ± 0.07     | 99.00          | 12.12          | 61.20 ± 4.01  |
| 21F16598            | 24.0 % | ✓ 0.0080710     | 1.36617          | 0.0112817        | 182.9748        | 639.5936        | 10.53 ± 0.01     | 99.61          | 11.47          | 57.59 ± 3.66  |
| 21F16599            | 24.0 % | 0.0094061       | 40.14255         | 0.0000000        | 14.2428         | 49.8067         | 10.54 ± 0.06     | 94.65          | 0.89           | 0.15 ± 0.00   |
| 21F16601            | 24.0 % | ✓ 0.0011767     | 1.06653          | 0.0596147        | 128.8774        | 451.3810        | 10.55 ± 0.01     | 99.90          | 8.08           | 51.96 ± 4.28  |
| 21F16602            | 24.0 % | 0.0087681       | 12.90751         | 0.0264802        | 5.1336          | 17.9869         | 10.56 ± 0.15     | 87.28          | 0.32           | 0.17 ± 0.00   |
| 21F16604            | 24.0 % | 0.0124042       | 19.56105         | 0.0516167        | 6.3244          | 21.6628         | 10.32 ± 0.13     | 85.39          | 0.40           | 0.14 ± 0.00   |
| 21F16605            | 24.0 % | 0.0188529       | 15.69611         | 0.0000000        | 5.2974          | 18.4513         | 10.49 ± 0.15     | 76.61          | 0.33           | 0.15 ± 0.00   |
| 21F16607            | 24.0 % | ✓ 0.0028574     | 0.48679          | 0.0067846        | 77.7455         | 272.0214        | 10.54 ± 0.01     | 99.67          | 4.87           | 68.68 ± 12.62 |
| 21F16608            | 24.0 % | ✓ 0.0052954     | 0.39091          | 0.0083769        | 62.1411         | 217.7919        | 10.56 ± 0.01     | 99.26          | 3.89           | 68.36 ± 15.11 |
| 21F16610            | 24.0 % | ✓ 0.0205993     | 2.77124          | 0.0117099        | 139.2363        | 487.6661        | 10.55 ± 0.01     | 98.74          | 8.73           | 21.60 ± 0.69  |
| 21F16611            | 24.0 % | 0.0027930       | 13.00353         | 0.0026183        | 4.4169          | 15.0930         | 10.30 ± 0.15     | 94.75          | 0.28           | 0.15 ± 0.00   |
| 21F16613            | 24.0 % | 0.0219817       | 11.78858         | 0.0193138        | 3.7434          | 13.0775         | 10.53 ± 0.21     | 66.58          | 0.23           | 0.14 ± 0.00   |
| 21F16614            | 24.0 % | ✓ 0.0108323     | 1.02303          | 0.0187335        | 128.6817        | 450.2699        | 10.54 ± 0.01     | 99.27          | 8.07           | 54.09 ± 4.44  |
| Σ                   |        | 0.5951020       | 335.24535        | 0.4820332        | 1595.5376       | 5588.0196       |                  |                |                |               |

| Information on Analysis                                                                                                                                                                                                                              | Results          | 40(r)/39(k) ± 2σ          | Age ± 2σ<br>(Ma)           | MSWD  | 39Ar(k)<br>(%,n)    | K/Ca ± 2σ     |
|------------------------------------------------------------------------------------------------------------------------------------------------------------------------------------------------------------------------------------------------------|------------------|---------------------------|----------------------------|-------|---------------------|---------------|
| Project = SWENTON (20-01)<br>Sample = VS19-085<br>Material = Sanidine<br>Location = Circle Bar<br>Region = Eastern Oregon<br>Analyst = Dan Miggins<br>Irradiation = 21-OSU-04 (4X12-21)<br>J = 0.00165067 ± 0.00000187<br>FCT-NM = 28.201 ± 0.023 Ma | Age Plateau      | 3.50725 ± 0.01901         | 10.57 ± 0.06               | > 100 | 93.55               | 46.04 ± 14.55 |
|                                                                                                                                                                                                                                                      | Error Mean       | ± 0.54%                   | ± 0.59%                    | 0%    | 13                  |               |
|                                                                                                                                                                                                                                                      |                  |                           | Full External Error ± 0.55 | 1.82  | 2σ Confidence Limit |               |
|                                                                                                                                                                                                                                                      |                  |                           | Analytical Error ± 0.06    | > 10  | Error Magnification |               |
|                                                                                                                                                                                                                                                      | Total Fusion Age | 3.50228 ± 0.00392 ± 0.11% | 10.55 ± 0.03 ± 0.25%       |       | 30                  | 2.05 ± 0.00   |
|                                                                                                                                                                                                                                                      |                  |                           | Full External Error ± 0.55 |       |                     |               |
|                                                                                                                                                                                                                                                      |                  |                           | Analytical Error ± 0.01    |       |                     |               |

| Normal Isochron |        |   | 39(k)/36(a) ± 2σ     | 40(a+r)/36(a) ± 2σ    | r.i.   |
|-----------------|--------|---|----------------------|-----------------------|--------|
| 21F16571        | 24.0 % |   | 1385.48 ± 334.78     | 5084.09 ± 1228.38     | 0.9998 |
| 21F16572        | 24.0 % |   | 115.00 ± 2.95        | 681.92 ± 17.34        | 0.9875 |
| 21F16574        | 24.0 % |   | 807.22 ± 97.87       | 3078.72 ± 373.16      | 0.9994 |
| 21F16575        | 24.0 % |   | 436.93 ± 24.81       | 1796.12 ± 101.90      | 0.9983 |
| 21F16577        | 24.0 % |   | 242.40 ± 19.70       | 1091.80 ± 88.47       | 0.9942 |
| 21F16578        | 24.0 % |   | 1913.12 ± 390.43     | 6989.33 ± 1426.33     | 0.9999 |
| 21F16580        | 24.0 % | ✓ | 3649.55 ± 193.55     | 13663.65 ± 724.54     | 0.9998 |
| 21F16581        | 24.0 % | ✓ | 12057.97 ± 670.99    | 42527.32 ± 2366.28    | 0.9999 |
| 21F16583        | 24.0 % | ✓ | 1784.88 ± 29.11      | 6549.21 ± 106.67      | 0.9987 |
| 21F16584        | 24.0 % |   | 246.31 ± 8.34        | 1177.81 ± 39.78       | 0.9953 |
| 21F16586        | 24.0 % |   | 1793.69 ± 278.58     | 6634.01 ± 1030.28     | 0.9999 |
| 21F16587        | 24.0 % | ✓ | 10551.73 ± 694.56    | 37216.45 ± 2449.56    | 0.9999 |
| 21F16589        | 24.0 % |   | 18.39 ± 0.18         | 359.37 ± 2.83         | 0.8190 |
| 21F16590        | 24.0 % |   | 1375.39 ± 214.18     | 5113.42 ± 796.21      | 0.9998 |
| 21F16592        | 24.0 % |   | 1082.42 ± 212.53     | 4058.00 ± 796.66      | 0.9996 |
| 21F16593        | 24.0 % | ✓ | 3531.80 ± 602.99     | 12625.94 ± 2155.59    | 0.9999 |
| 21F16595        | 24.0 % | ✓ | 5593.91 ± 5583.45    | 19813.34 ± 19776.27   | 1.0000 |
| 21F16596        | 24.0 % | ✓ | 8573.85 ± 5358.50    | 30271.33 ± 18918.99   | 1.0000 |
| 21F16598        | 24.0 % | ✓ | 22670.58 ± 2277.35   | 79544.20 ± 7990.29    | 1.0000 |
| 21F16599        | 24.0 % |   | 1514.20 ± 137.08     | 5593.68 ± 506.32      | 0.9998 |
| 21F16601        | 24.0 % | ✓ | 109523.99 ± 77752.90 | 383895.90 ± 272533.92 | 1.0000 |
| 21F16602        | 24.0 % |   | 585.48 ± 54.30       | 2349.95 ± 217.84      | 0.9989 |
| 21F16604        | 24.0 % |   | 509.86 ± 37.18       | 2044.97 ± 149.05      | 0.9988 |
| 21F16605        | 24.0 % |   | 280.99 ± 12.90       | 1277.26 ± 58.52       | 0.9958 |
| 21F16607        | 24.0 % | ✓ | 27208.30 ± 7341.50   | 95496.82 ± 25767.40   | 1.0000 |
| 21F16608        | 24.0 % | ✓ | 11735.01 ± 1638.06   | 41427.39 ± 5782.66    | 1.0000 |
| 21F16610        | 24.0 % | ✓ | 6759.28 ± 267.11     | 23972.49 ± 947.16     | 0.9998 |
| 21F16611        | 24.0 % |   | 1581.40 ± 387.00     | 5702.36 ± 1395.36     | 0.9998 |
| 21F16613        | 24.0 % |   | 170.30 ± 6.51        | 893.49 ± 33.90        | 0.9895 |
| 21F16614        | 24.0 % | ✓ | 11879.41 ± 848.62    | 41865.78 ± 2990.55    | 0.9999 |

| Results         | 40(a)/36(a) ± 2σ      | 40(r)/39(k) ± 2σ  | Age ± 2σ (Ma)              | MSWD            |
|-----------------|-----------------------|-------------------|----------------------------|-----------------|
| Normal Isochron | 305.74 ± 60.57        | 3.50163 ± 0.01120 | 10.55 ± 0.04               | 55.52           |
| Error Chron     | ± 19.81%              | ± 0.32%           | ± 0.39%                    | 0%              |
|                 |                       |                   | Full External Error ± 0.55 |                 |
|                 |                       |                   | Analytical Error ± 0.03    |                 |
| Statistics      | 2σ Confidence Limit   | 1.85              | Convergence                | 0.000000047268  |
|                 | Error Magnification   | 7.4512            | Number of Iterations       | 1               |
|                 | Number of Data Points | 13                | Calculated Line            | Weighted York-2 |

| Inverse Isochron |        | 39(k)/40(a+r) ± 2σ |                       | 36(a)/40(a+r) ± 2σ      | r.i.   |
|------------------|--------|--------------------|-----------------------|-------------------------|--------|
| 21F16571         | 24.0 % |                    | 0.2725132 ± 0.0013752 | 0.00019669 ± 0.00004752 | 0.0062 |
| 21F16572         | 24.0 % |                    | 0.1686480 ± 0.0006821 | 0.00146644 ± 0.00003728 | 0.0301 |
| 21F16574         | 24.0 % |                    | 0.2621927 ± 0.0011368 | 0.00032481 ± 0.00003937 | 0.0100 |
| 21F16575         | 24.0 % |                    | 0.2432655 ± 0.0007951 | 0.00055676 ± 0.00003159 | 0.0129 |
| 21F16577         | 24.0 % |                    | 0.2220156 ± 0.0019382 | 0.00091592 ± 0.00007422 | 0.0266 |
| 21F16578         | 24.0 % |                    | 0.2737206 ± 0.0008150 | 0.00014308 ± 0.00002920 | 0.0049 |
| 21F16580         | 24.0 % | ✓                  | 0.2670992 ± 0.0002510 | 0.00007319 ± 0.00000388 | 0.0017 |
| 21F16581         | 24.0 % | ✓                  | 0.2835347 ± 0.0002253 | 0.00002351 ± 0.00000131 | 0.0004 |
| 21F16583         | 24.0 % | ✓                  | 0.2725343 ± 0.0002223 | 0.00015269 ± 0.00000249 | 0.0017 |
| 21F16584         | 24.0 % |                    | 0.2091227 ± 0.0006840 | 0.00084903 ± 0.00002868 | 0.0222 |
| 21F16586         | 24.0 % |                    | 0.2703780 ± 0.0006473 | 0.00015074 ± 0.00002341 | 0.0041 |
| 21F16587         | 24.0 % | ✓                  | 0.2835233 ± 0.0002323 | 0.00002687 ± 0.00000177 | 0.0005 |
| 21F16589         | 24.0 % |                    | 0.0511636 ± 0.0002801 | 0.00278267 ± 0.00002190 | 0.0105 |
| 21F16590         | 24.0 % |                    | 0.2689758 ± 0.0008988 | 0.00019556 ± 0.00003045 | 0.0067 |
| 21F16592         | 24.0 % |                    | 0.2667368 ± 0.0014099 | 0.00024643 ± 0.00004838 | 0.0081 |
| 21F16593         | 24.0 % | ✓                  | 0.2797256 ± 0.0004827 | 0.00007920 ± 0.00001352 | 0.0024 |
| 21F16595         | 24.0 % | ✓                  | 0.2823307 ± 0.0002618 | 0.00005047 ± 0.00005038 | 0.0000 |
| 21F16596         | 24.0 % | ✓                  | 0.2832335 ± 0.0002267 | 0.00003303 ± 0.00002065 | 0.0000 |
| 21F16598         | 24.0 % | ✓                  | 0.2850061 ± 0.0002287 | 0.00001257 ± 0.00000126 | 0.0002 |
| 21F16599         | 24.0 % |                    | 0.2706981 ± 0.0004835 | 0.00017877 ± 0.00001618 | 0.0042 |
| 21F16601         | 24.0 % | ✓                  | 0.2852961 ± 0.0002344 | 0.00000260 ± 0.00000185 | 0.0000 |
| 21F16602         | 24.0 % |                    | 0.2491472 ± 0.0010593 | 0.00042554 ± 0.00003945 | 0.0126 |
| 21F16604         | 24.0 % |                    | 0.2493248 ± 0.0009067 | 0.00048901 ± 0.00003564 | 0.0141 |
| 21F16605         | 24.0 % |                    | 0.2199914 ± 0.0009227 | 0.00078292 ± 0.00003587 | 0.0200 |
| 21F16607         | 24.0 % | ✓                  | 0.2849131 ± 0.0002462 | 0.00001047 ± 0.00000283 | 0.0002 |
| 21F16608         | 24.0 % | ✓                  | 0.2832670 ± 0.0002569 | 0.00002414 ± 0.00000337 | 0.0007 |
| 21F16610         | 24.0 % | ✓                  | 0.2819597 ± 0.0002285 | 0.00004171 ± 0.00000165 | 0.0008 |
| 21F16611         | 24.0 % |                    | 0.2773241 ± 0.0014396 | 0.00017537 ± 0.00004291 | 0.0064 |
| 21F16613         | 24.0 % |                    | 0.1905976 ± 0.0010523 | 0.00111921 ± 0.00004246 | 0.0234 |
| 21F16614         | 24.0 % | ✓                  | 0.2837499 ± 0.0002306 | 0.00002389 ± 0.00000171 | 0.0004 |

| Results          | 40(a)/36(a) ± 2σ      | 40(r)/39(k) ± 2σ  | Age ± 2σ (Ma)              | MSWD            |
|------------------|-----------------------|-------------------|----------------------------|-----------------|
| Inverse Isochron | 439.56 ± 149.03       | 3.48924 ± 0.02500 | 10.51 ± 0.08               | > 100           |
| Error Chron      | ± 33.90%              | ± 0.72%           | ± 0.75%                    | 0%              |
|                  |                       |                   | Full External Error ± 0.55 |                 |
|                  |                       |                   | Analytical Error ± 0.08    |                 |
| Statistics       | 2σ Confidence Limit   | 1.85              | Convergence                | 0.0001447408    |
|                  | Error Magnification   | > 10              | Number of Iterations       | 5               |
|                  | Number of Data Points | 13                | Calculated Line            | Weighted York-2 |
|                  | Spreading Factor      | 6.3%              |                            |                 |

| Degassing Patterns |        | 36Ar(a)<br>[fA] | %1σ   | 36Ar(c)<br>[fA] | %1σ  | 36Ar(ca)<br>[fA] | %1σ   | 36Ar(cl)<br>[fA] | %1σ    | 37Ar(ca)<br>[fA] | %1σ   | 38Ar(a)<br>[fA] | %1σ   | 38Ar(c)<br>[fA] | %1σ  | 38Ar(k)<br>[fA] | %1σ  | 38Ar(ca)<br>[fA] | %1σ   | 38Ar(cl)<br>[fA] | %1σ    | 39Ar(k)<br>[fA] | %1σ  | 39Ar(ca)<br>[fA] | %1σ   | 40Ar(r)<br>[fA] | %1σ  | 40Ar(a)<br>[fA] | %1σ   | 40Ar(c)<br>[fA] | %1σ  | 40Ar(k)<br>[fA] | %1σ  |
|--------------------|--------|-----------------|-------|-----------------|------|------------------|-------|------------------|--------|------------------|-------|-----------------|-------|-----------------|------|-----------------|------|------------------|-------|------------------|--------|-----------------|------|------------------|-------|-----------------|------|-----------------|-------|-----------------|------|-----------------|------|
| 21F16571           | 24.0 % | 0.0031095       | 12.08 | 0.0000000       | 0.00 | 0.0031970        | 0.48  | 0.0000024        | 50.00  | 11.82750         | 0.45  | 0.0005861       | 12.08 | 0.0000000       | 0.00 | 0.052029        | 0.23 | 0.0021290        | 9.64  | 0.0184220        | 50.01  | 4.3081          | 0.21 | 0.0075992        | 1.02  | 14.8805         | 0.77 | 0.92837         | 12.08 | 0.0000000       | 0.00 | 0.0026150       | 9.65 |
| 21F16572           | 24.0 % | 0.0433486       | 1.27  | 0.0000000       | 0.00 | 0.0039916        | 0.43  | 0.0000086        | 13.69  | 14.76716         | 0.40  | 0.0081712       | 1.28  | 0.0000000       | 0.00 | 0.060207        | 0.20 | 0.0026581        | 9.64  | 0.0657014        | 13.72  | 4.9853          | 0.18 | 0.0094879        | 1.00  | 16.6182         | 1.00 | 12.94217        | 1.27  | 0.0000000       | 0.00 | 0.0030261       | 9.65 |
| 21F16574           | 24.0 % | 0.0065051       | 6.06  | 0.0000000       | 0.00 | 0.0037887        | 0.45  | 0.0000010        | 119.75 | 14.01672         | 0.41  | 0.0012262       | 6.06  | 0.0000000       | 0.00 | 0.063416        | 0.20 | 0.0025230        | 9.64  | 0.0077506        | 119.76 | 5.2510          | 0.18 | 0.0090057        | 1.01  | 18.0851         | 0.66 | 1.94215         | 6.06  | 0.0000000       | 0.00 | 0.0031874       | 9.65 |
| 21F16575           | 24.0 % | 0.0157210       | 2.84  | 0.0000000       | 0.00 | 0.0055106        | 0.38  | 0.0000000        | 0.00   | 20.38681         | 0.34  | 0.0029634       | 2.84  | 0.0000000       | 0.00 | 0.082957        | 0.17 | 0.0036696        | 9.64  | 0.0000000        | 0.00   | 6.8690          | 0.14 | 0.0130985        | 0.98  | 23.5430         | 0.57 | 4.69365         | 2.84  | 0.0000000       | 0.00 | 0.0041695       | 9.65 |
| 21F16577           | 24.0 % | 0.0100930       | 4.05  | 0.0000000       | 0.00 | 0.0019375        | 0.72  | 0.0000014        | 87.64  | 7.16811          | 0.70  | 0.0019025       | 4.05  | 0.0000000       | 0.00 | 0.029546        | 0.39 | 0.0012903        | 9.66  | 0.0105900        | 87.65  | 2.4465          | 0.38 | 0.0046055        | 1.16  | 8.0061          | 1.55 | 3.01336         | 4.05  | 0.0000000       | 0.00 | 0.0014850       | 9.66 |
| 21F16578           | 24.0 % | 0.0041159       | 10.20 | 0.0000000       | 0.00 | 0.0064228        | 0.36  | 0.0000034        | 39.61  | 23.76191         | 0.32  | 0.0007759       | 10.20 | 0.0000000       | 0.00 | 0.095098        | 0.15 | 0.0042771        | 9.64  | 0.0258197        | 39.62  | 7.8743          | 0.12 | 0.0152670        | 0.97  | 27.5387         | 0.46 | 1.22885         | 10.20 | 0.0000000       | 0.00 | 0.0047797       | 9.65 |
| 21F16580           | 24.0 % | ✓ 0.0142705     | 2.65  | 0.0000000       | 0.00 | 0.0005632        | 2.15  | 0.0000023        | 56.57  | 2.08362          | 2.15  | 0.0026900       | 2.66  | 0.0000000       | 0.00 | 0.628980        | 0.10 | 0.0003751        | 9.87  | 0.0176576        | 56.57  | 52.0808         | 0.04 | 0.0013387        | 2.34  | 190.7260        | 0.06 | 4.26059         | 2.65  | 0.0000000       | 0.00 | 0.0316130       | 9.65 |
| 21F16581           | 24.0 % | ✓ 0.0146189     | 2.78  | 0.0000000       | 0.00 | 0.0003610        | 3.31  | 0.0000000        | 0.00   | 1.33545          | 3.31  | 0.0027557       | 2.79  | 0.0000000       | 0.00 | 2.128864        | 0.10 | 0.0002404        | 10.18 | 0.0000000        | 0.00   | 176.2743        | 0.04 | 0.0008580        | 3.43  | 617.3379        | 0.02 | 4.36462         | 2.78  | 0.0000000       | 0.00 | 0.1069985       | 9.65 |
| 21F16583           | 24.0 % | ✓ 0.0727723     | 0.81  | 0.0000000       | 0.00 | 0.0002093        | 5.83  | 0.0000043        | 31.39  | 0.77442          | 5.82  | 0.0137176       | 0.83  | 0.0000000       | 0.00 | 1.568682        | 0.10 | 0.0001394        | 11.25 | 0.0325194        | 31.40  | 129.8901        | 0.04 | 0.0004976        | 5.90  | 454.8739        | 0.04 | 21.72690        | 0.82  | 0.0000000       | 0.00 | 0.0788433       | 9.65 |
| 21F16584           | 24.0 % | 0.0282531       | 1.69  | 0.0000000       | 0.00 | 0.0056416        | 0.38  | 0.0000018        | 65.92  | 20.87160         | 0.34  | 0.0053257       | 1.69  | 0.0000000       | 0.00 | 0.084043        | 0.17 | 0.0037569        | 9.64  | 0.0140718        | 65.93  | 6.9590          | 0.14 | 0.0134100        | 0.98  | 24.8417         | 0.58 | 8.43525         | 1.69  | 0.0000000       | 0.00 | 0.0042241       | 9.65 |
| 21F16586           | 24.0 % | 0.0057821       | 7.76  | 0.0000000       | 0.00 | 0.0079303        | 0.35  | 0.0000026        | 46.86  | 29.33878         | 0.30  | 0.0010899       | 7.77  | 0.0000000       | 0.00 | 0.125255        | 0.14 | 0.0052810        | 9.63  | 0.0200983        | 46.87  | 10.3714         | 0.10 | 0.0188502        | 0.97  | 36.6325         | 0.37 | 1.72632         | 7.77  | 0.0000000       | 0.00 | 0.0062954       | 9.65 |
| 21F16587           | 24.0 % | ✓ 0.0119805     | 3.29  | 0.0000000       | 0.00 | 0.0025411        | 0.55  | 0.0000000        | 0.00   | 9.40101          | 0.52  | 0.0022583       | 3.29  | 0.0000000       | 0.00 | 1.526718        | 0.10 | 0.0016922        | 9.64  | 0.0000000        | 0.00   | 126.4153        | 0.04 | 0.0060401        | 1.06  | 442.2958        | 0.03 | 3.57691         | 3.29  | 0.0000000       | 0.00 | 0.0767341       | 9.65 |
| 21F16589           | 24.0 % | 0.1913233       | 0.39  | 0.0000000       | 0.00 | 0.0041181        | 0.40  | 0.0000001        | #####  | 15.23535         | 0.36  | 0.0360644       | 0.42  | 0.0000000       | 0.00 | 0.042484        | 0.29 | 0.0027424        | 9.64  | 0.0006291        | #####  | 3.5178          | 0.27 | 0.0097887        | 0.99  | 11.6339         | 2.00 | 57.12149        | 0.41  | 0.0000000       | 0.00 | 0.0021353       | 9.65 |
| 21F16590           | 24.0 % | 0.0049301       | 7.78  | 0.0000000       | 0.00 | 0.0063697        | 0.36  | 0.0000017        | 73.97  | 23.56512         | 0.32  | 0.0009293       | 7.79  | 0.0000000       | 0.00 | 0.081892        | 0.17 | 0.0042417        | 9.64  | 0.0132004        | 73.98  | 6.7808          | 0.14 | 0.0151406        | 0.97  | 23.7377         | 0.49 | 1.47193         | 7.79  | 0.0000000       | 0.00 | 0.0041159       | 9.65 |
| 21F16592           | 24.0 % | 0.0040420       | 9.81  | 0.0000000       | 0.00 | 0.0034309        | 0.47  | 0.0000000        | 0.00   | 12.69306         | 0.44  | 0.0007619       | 9.82  | 0.0000000       | 0.00 | 0.052839        | 0.24 | 0.0022848        | 9.64  | 0.0000000        | 0.00   | 4.3751          | 0.22 | 0.0081553        | 1.02  | 15.1957         | 0.80 | 1.20678         | 9.82  | 0.0000000       | 0.00 | 0.0026557       | 9.65 |
| 21F16593           | 24.0 % | ✓ 0.0045299     | 8.54  | 0.0000000       | 0.00 | 0.0016112        | 0.81  | 0.0000031        | 39.09  | 5.96068          | 0.79  | 0.0008539       | 8.54  | 0.0000000       | 0.00 | 0.193215        | 0.12 | 0.0010729        | 9.66  | 0.0236012        | 39.10  | 15.9986         | 0.08 | 0.0038297        | 1.22  | 55.8415         | 0.21 | 1.35244         | 8.54  | 0.0000000       | 0.00 | 0.0097111       | 9.65 |
| 21F16595           | 24.0 % | ✓ 0.0141149     | 49.91 | 0.0000000       | 0.00 | 0.0001339        | 9.27  | 0.0000020        | 61.97  | 0.49551          | 9.26  | 0.0026607       | 49.91 | 0.0000000       | 0.00 | 0.953570        | 0.10 | 0.0000892        | 13.36 | 0.0154414        | 61.98  | 78.9575         | 0.05 | 0.0003184        | 9.31  | 275.4490        | 0.76 | 4.21414         | 49.91 | 0.0000000       | 0.00 | 0.0479272       | 9.65 |
| 21F16596           | 24.0 % | ✓ 0.0225532     | 31.25 | 0.0000000       | 0.00 | 0.0003672        | 3.28  | 0.0000000        | 0.00   | 1.35854          | 3.27  | 0.0042513       | 31.25 | 0.0000000       | 0.00 | 2.335298        | 0.10 | 0.0002445        | 10.17 | 0.0000000        | 0.00   | 193.3674        | 0.04 | 0.0008729        | 3.40  | 675.9803        | 0.31 | 6.73347         | 31.25 | 0.0000000       | 0.00 | 0.1173740       | 9.65 |
| 21F16598           | 24.0 % | ✓ 0.0080710     | 5.02  | 0.0000000       | 0.00 | 0.0003693        | 3.18  | 0.0000015        | 100.44 | 1.36617          | 3.17  | 0.0015214       | 5.03  | 0.0000000       | 0.00 | 2.209787        | 0.10 | 0.0002459        | 10.14 | 0.0112817        | 100.45 | 182.9748        | 0.04 | 0.0008778        | 3.30  | 639.5936        | 0.02 | 2.40969         | 5.02  | 0.0000000       | 0.00 | 0.1110657       | 9.65 |
| 21F16599           | 24.0 % | 0.0094061       | 4.53  | 0.0000000       | 0.00 | 0.0108505        | 0.33  | 0.0000000        | 0.00   | 40.14255         | 0.28  | 0.0017731       | 4.53  | 0.0000000       | 0.00 | 0.172010        | 0.12 | 0.0072257        | 9.63  | 0.0000000        | 0.00   | 14.2428         | 0.08 | 0.0257916        | 0.96  | 49.8067         | 0.26 | 2.80830         | 4.53  | 0.0000000       | 0.00 | 0.0086454       | 9.65 |
| 21F16601           | 24.0 % | ✓ 0.0011767     | 35.50 | 0.0000000       | 0.00 | 0.0002883        | 4.12  | 0.0000078        | 17.63  | 1.06653          | 4.12  | 0.0002218       | 35.50 | 0.0000000       | 0.00 | 1.556453        | 0.10 | 0.0001920        | 10.47 | 0.0596147        | 17.65  | 128.8774        | 0.04 | 0.0006852        | 4.22  | 451.3810        | 0.03 | 0.35132         | 35.50 | 0.0000000       | 0.00 | 0.0782286       | 9.65 |
| 21F16602           | 24.0 % | 0.0087681       | 4.63  | 0.0000000       | 0.00 | 0.0034889        | 0.46  | 0.0000035        | 36.47  | 12.90751         | 0.42  | 0.0016528       | 4.64  | 0.0000000       | 0.00 | 0.061998        | 0.20 | 0.0023234        | 9.64  | 0.0264802        | 36.48  | 5.1336          | 0.18 | 0.0082931        | 1.01  | 17.9869         | 0.69 | 2.61781         | 4.63  | 0.0000000       | 0.00 | 0.0031161       | 9.65 |
| 21F16604           | 24.0 % | 0.0124042       | 3.64  | 0.0000000       | 0.00 | 0.0052874        | 0.39  | 0.0000068        | 17.93  | 19.56105         | 0.35  | 0.0023382       | 3.65  | 0.0000000       | 0.00 | 0.076380        | 0.18 | 0.0035210        | 9.64  | 0.0516167        | 17.96  | 6.3244          | 0.15 | 0.0125680        | 0.98  | 21.6628         | 0.63 | 3.70340         | 3.64  | 0.0000000       | 0.00 | 0.0038389       | 9.65 |
| 21F16605           | 24.0 % | 0.0188529       | 2.29  | 0.0000000       | 0.00 | 0.0042427        | 0.41  | 0.0000000        | 0.00   | 15.69611         | 0.38  | 0.0035538       | 2.29  | 0.0000000       | 0.00 | 0.063977        | 0.21 | 0.0028253        | 9.64  | 0.0000000        | 0.00   | 5.2974          | 0.19 | 0.0100847        | 0.99  | 18.4513         | 0.71 | 5.62871         | 2.29  | 0.0000000       | 0.00 | 0.0032155       | 9.65 |
| 21F16607           | 24.0 % | ✓ 0.0028574     | 13.49 | 0.0000000       | 0.00 | 0.0001316        | 9.19  | 0.0000009        | 134.37 | 0.48679          | 9.19  | 0.0005386       | 13.49 | 0.0000000       | 0.00 | 0.938933        | 0.10 | 0.0000876        | 13.31 | 0.0067846        | 134.37 | 77.7455         | 0.04 | 0.0003128        | 9.23  | 272.0214        | 0.04 | 0.85311         | 13.49 | 0.0000000       | 0.00 | 0.0471915       | 9.65 |
| 21F16608           | 24.0 % | ✓ 0.0052954     | 6.98  | 0.0000000       | 0.00 | 0.0001057        | 11.05 | 0.0000011        | 117.26 | 0.39091          | 11.05 | 0.0009982       | 6.98  | 0.0000000       | 0.00 | 0.750478        | 0.10 | 0.0000704        | 14.66 | 0.0083769        | 117.26 | 62.1411         | 0.04 | 0.0002512        | 11.09 | 217.7919        | 0.05 | 1.58098         | 6.98  | 0.0000000       | 0.00 | 0.0377196       | 9.65 |
| 21F16610           | 24.0 % | ✓ 0.0205993     | 1.98  | 0.0000000       | 0.00 | 0.0007491        | 1.61  | 0.0000015        | 91.22  | 2.77124          | 1.60  | 0.0038830       | 1.98  | 0.0000000       | 0.00 | 1.681557        | 0.10 | 0.0004988        | 9.76  | 0.0117099        | 91.22  | 139.2363        | 0.04 | 0.0017805        | 1.85  | 487.6661        | 0.03 | 6.15012         | 1.98  | 0.0000000       | 0.00 | 0.0845164       | 9.65 |
| 21F16611           | 24.0 % | 0.0027930       | 12.23 | 0.0000000       | 0.00 | 0.0035149        | 0.45  | 0.0000003        | 351.58 | 13.00353         | 0.42  | 0.0005265       | 12.24 | 0.0000000       | 0.00 | 0.053343        | 0.24 | 0.0023406        | 9.64  | 0.0026183        | 351.58 | 4.4169          | 0.22 | 0.0083548        | 1.01  | 15.0930         | 0.69 | 0.83389         | 12.23 | 0.0000000       | 0.00 | 0.0026811       | 9.65 |
| 21F16613           | 24.0 % | 0.0219817       | 1.89  | 0.0000000       | 0.00 | 0.0031865        | 0.52  | 0.0000025        | 47.83  | 11.78858         | 0.49  | 0.0041436       | 1.90  | 0.0000000       | 0.00 | 0.045209        | 0.27 | 0.0021219        | 9.64  | 0.0193138        | 47.84  | 3.7434          | 0.25 | 0.0075742        | 1.04  | 13.0775         | 0.97 | 6.56286         | 1.90  | 0.0000000       | 0.00 | 0.0022723       | 9.65 |
| 21F16614           | 24.0 % | ✓ 0.0108323     | 3.57  | 0.0000000       | 0.00 | 0.0002765        | 4.11  | 0.0000025        | 53.97  | 1.02303          | 4.10  | 0.0020419       | 3.58  | 0.0000000       | 0.00 | 1.554089        | 0.10 | 0.0001841        | 10.47 | 0.0187335        | 53.98  | 128.6817        | 0.04 | 0.0006573        | 4.21  | 450.2699        | 0.03 | 3.23410         | 3.57  | 0.0000000       | 0.00 | 0.0781098       | 9.65 |
| Σ                  |        | 0.5951020       | 1.72  | 0.0000000       | 0.00 | 0.0906168        | 0.10  | 0.0000631        | 9.67   | 335.24535        | 0.10  | 0.1121767       | 1.72  | 0.0000000       | 0.00 | 19.269307       | 0.03 |                  |       |                  |        |                 |      |                  |       |                 |      |                 |       |                 |      |                 |      |

| Additional Parameters |        | 40Ar/39Ar | 1σ       | 37Ar/39Ar | 1σ       | 36Ar/39Ar | 1σ       | Time (days) | 37Ar (decay) | 39Ar (decay) | 40Ar (moles) |
|-----------------------|--------|-----------|----------|-----------|----------|-----------|----------|-------------|--------------|--------------|--------------|
| 21F16571              | 24.0 % | 3.663692  | 0.009232 | 2.740555  | 0.013508 | 0.001462  | 0.000087 | 80.538      | 4.919753     | 1.00056932   | 5.597E-13    |
| 21F16572              | 24.0 % | 5.918854  | 0.011951 | 2.956517  | 0.012866 | 0.009480  | 0.000111 | 80.544      | 4.920361     | 1.00056937   | 1.047E-12    |
| 21F16574              | 24.0 % | 3.808064  | 0.008245 | 2.664777  | 0.012086 | 0.001957  | 0.000075 | 80.556      | 4.921508     | 1.00056945   | 7.091E-13    |
| 21F16575              | 24.0 % | 4.103517  | 0.006695 | 2.962293  | 0.010850 | 0.003085  | 0.000065 | 80.563      | 4.922116     | 1.00056949   | 9.997E-13    |
| 21F16577              | 24.0 % | 4.496330  | 0.019598 | 2.924445  | 0.023382 | 0.004909  | 0.000168 | 80.574      | 4.923264     | 1.00056958   | 3.901E-13    |
| 21F16578              | 24.0 % | 3.646896  | 0.005421 | 3.011819  | 0.010233 | 0.001336  | 0.000053 | 80.581      | 4.923872     | 1.00056962   | 1.019E-12    |
| 21F16580              | 24.0 % | ✓3.744438 | 0.001758 | 0.040006  | 0.000859 | 0.000285  | 0.000007 | 80.592      | 4.925020     | 1.00056970   | 6.904E-12    |
| 21F16581              | 24.0 % | ✓3.527495 | 0.001400 | 0.007576  | 0.000251 | 0.000085  | 0.000002 | 80.599      | 4.925628     | 1.00056975   | 2.201E-11    |
| 21F16583              | 24.0 % | ✓3.669856 | 0.001495 | 0.005962  | 0.000347 | 0.000562  | 0.000005 | 80.610      | 4.926777     | 1.00056983   | 1.687E-11    |
| 21F16584              | 24.0 % | 4.773290  | 0.007794 | 2.993474  | 0.011119 | 0.004862  | 0.000069 | 80.616      | 4.927317     | 1.00056987   | 1.178E-12    |
| 21F16586              | 24.0 % | 3.692422  | 0.004413 | 2.823689  | 0.009015 | 0.001320  | 0.000043 | 80.628      | 4.928534     | 1.00056996   | 1.358E-12    |
| 21F16587              | 24.0 % | ✓3.527485 | 0.001444 | 0.074363  | 0.000388 | 0.000115  | 0.000003 | 80.634      | 4.929075     | 1.00057000   | 1.579E-11    |
| 21F16589              | 24.0 % | 19.491528 | 0.053206 | 4.318951  | 0.019608 | 0.055404  | 0.000260 | 80.647      | 4.930292     | 1.00057009   | 2.434E-12    |
| 21F16590              | 24.0 % | 3.710130  | 0.006188 | 3.467538  | 0.011937 | 0.001663  | 0.000056 | 80.652      | 4.930833     | 1.00057013   | 8.926E-13    |
| 21F16592              | 24.0 % | 3.742644  | 0.009877 | 2.895776  | 0.014233 | 0.001705  | 0.000091 | 80.665      | 4.932051     | 1.00057021   | 5.807E-13    |
| 21F16593              | 24.0 % | ✓3.574683 | 0.003083 | 0.372486  | 0.002971 | 0.000384  | 0.000024 | 80.670      | 4.932592     | 1.00057025   | 2.025E-12    |
| 21F16595              | 24.0 % | ✓3.542538 | 0.001641 | 0.006276  | 0.000581 | 0.000180  | 0.000089 | 80.682      | 4.933742     | 1.00057034   | 9.902E-12    |
| 21F16596              | 24.0 % | ✓3.531247 | 0.001412 | 0.007026  | 0.000230 | 0.000119  | 0.000036 | 80.688      | 4.934351     | 1.00057038   | 2.417E-11    |
| 21F16598              | 24.0 % | ✓3.509287 | 0.001407 | 0.007466  | 0.000237 | 0.000046  | 0.000002 | 80.700      | 4.935502     | 1.00057046   | 2.273E-11    |
| 21F16599              | 24.0 % | 3.688080  | 0.003288 | 2.813356  | 0.008256 | 0.001420  | 0.000030 | 80.706      | 4.936111     | 1.00057051   | 1.863E-12    |
| 21F16601              | 24.0 % | ✓3.505719 | 0.001439 | 0.008275  | 0.000341 | 0.000011  | 0.000003 | 80.718      | 4.937262     | 1.00057059   | 1.599E-11    |
| 21F16602              | 24.0 % | 4.007824  | 0.008509 | 2.510265  | 0.011538 | 0.002384  | 0.000079 | 80.724      | 4.937872     | 1.00057064   | 7.295E-13    |
| 21F16604              | 24.0 % | 4.003484  | 0.007269 | 3.086806  | 0.011838 | 0.002793  | 0.000071 | 80.736      | 4.939024     | 1.00057072   | 8.981E-13    |
| 21F16605              | 24.0 % | 4.537601  | 0.009501 | 2.957350  | 0.012371 | 0.004351  | 0.000082 | 80.742      | 4.939633     | 1.00057076   | 8.525E-13    |
| 21F16607              | 24.0 % | ✓3.510435 | 0.001515 | 0.006261  | 0.000575 | 0.000038  | 0.000005 | 80.754      | 4.940785     | 1.00057085   | 9.661E-12    |
| 21F16608              | 24.0 % | ✓3.530831 | 0.001600 | 0.006291  | 0.000695 | 0.000087  | 0.000006 | 80.760      | 4.941395     | 1.00057089   | 7.767E-12    |
| 21F16610              | 24.0 % | ✓3.547167 | 0.001436 | 0.019903  | 0.000319 | 0.000153  | 0.000003 | 80.772      | 4.942548     | 1.00057097   | 1.748E-11    |
| 21F16611              | 24.0 % | 3.599688  | 0.009330 | 2.938480  | 0.013850 | 0.001426  | 0.000077 | 80.778      | 4.943158     | 1.00057102   | 5.639E-13    |
| 21F16613              | 24.0 % | 5.236667  | 0.014431 | 3.142797  | 0.017450 | 0.006710  | 0.000112 | 80.790      | 4.944311     | 1.00057110   | 6.954E-13    |
| 21F16614              | 24.0 % | ✓3.524820 | 0.001431 | 0.007950  | 0.000326 | 0.000086  | 0.000003 | 80.796      | 4.944853     | 1.00057114   | 1.606E-11    |

| Procedure<br>Blanks |        | 36Ar ± 1σ (SE)<br>[fA] | 37Ar ± 1σ (SE)<br>[fA] | 38Ar ± 1σ (SE)<br>[fA] | 39Ar ± 1σ (SE)<br>[fA] | 40Ar ± 1σ (SE)<br>[fA] |
|---------------------|--------|------------------------|------------------------|------------------------|------------------------|------------------------|
| 21F16571            | 24.0 % | 0.0190067 ± 0.0002501  | 0.0087637 ± 0.0064337  | 0.0072290 ± 0.0060995  | 0.0052949 ± 0.0062938  | 4.8948436 ± 0.0154858  |
| 21F16572            | 24.0 % | 0.0190067 ± 0.0002501  | 0.0087637 ± 0.0064337  | 0.0072290 ± 0.0060995  | 0.0052949 ± 0.0062938  | 4.8948436 ± 0.0154858  |
| 21F16574            | 24.0 % | 0.0177724 ± 0.0002386  | 0.0046789 ± 0.0065460  | 0.0039434 ± 0.0063278  | 0.0004877 ± 0.0061157  | 4.8015017 ± 0.0146129  |
| 21F16575            | 24.0 % | 0.0177724 ± 0.0002386  | 0.0046789 ± 0.0065460  | 0.0039434 ± 0.0063278  | 0.0004877 ± 0.0061157  | 4.8015017 ± 0.0146129  |
| 21F16577            | 24.0 % | 0.0182021 ± 0.0002326  | 0.0052618 ± 0.0066615  | 0.0008394 ± 0.0065497  | 0.0035539 ± 0.0063084  | 4.7105503 ± 0.0167816  |
| 21F16578            | 24.0 % | 0.0182021 ± 0.0002326  | 0.0052618 ± 0.0066615  | 0.0008394 ± 0.0065497  | 0.0035539 ± 0.0063084  | 4.7105503 ± 0.0167816  |
| 21F16580            | 24.0 % | 0.0180196 ± 0.0002098  | 0.0146412 ± 0.0061833  | 0.0148811 ± 0.0067448  | 0.0106482 ± 0.0058929  | 4.7124002 ± 0.0146437  |
| 21F16581            | 24.0 % | 0.0180196 ± 0.0002098  | 0.0146412 ± 0.0061833  | 0.0148811 ± 0.0067448  | 0.0106482 ± 0.0058929  | 4.7124002 ± 0.0146437  |
| 21F16583            | 24.0 % | 0.0178667 ± 0.0002512  | 0.0051829 ± 0.0064491  | 0.0140195 ± 0.0063212  | 0.0154655 ± 0.0063658  | 4.6288150 ± 0.0158715  |
| 21F16584            | 24.0 % | 0.0178667 ± 0.0002512  | 0.0051829 ± 0.0064491  | 0.0140195 ± 0.0063212  | 0.0154655 ± 0.0063658  | 4.6288150 ± 0.0158715  |
| 21F16586            | 24.0 % | 0.0179443 ± 0.0002427  | 0.0151410 ± 0.0062219  | 0.0084416 ± 0.0066129  | 0.0130703 ± 0.0064780  | 4.6904255 ± 0.0166356  |
| 21F16587            | 24.0 % | 0.0179443 ± 0.0002427  | 0.0151410 ± 0.0062219  | 0.0084416 ± 0.0066129  | 0.0130703 ± 0.0064780  | 4.6904255 ± 0.0166356  |
| 21F16589            | 24.0 % | 0.0170288 ± 0.0002290  | 0.0008567 ± 0.0056965  | 0.0029321 ± 0.0068620  | 0.0128309 ± 0.0059990  | 4.5271378 ± 0.0141939  |
| 21F16590            | 24.0 % | 0.0170288 ± 0.0002290  | 0.0008567 ± 0.0056965  | 0.0029321 ± 0.0068620  | 0.0128309 ± 0.0059990  | 4.5271378 ± 0.0141939  |
| 21F16592            | 24.0 % | 0.0174731 ± 0.0002374  | 0.0009485 ± 0.0064763  | 0.0028195 ± 0.0066945  | 0.0116797 ± 0.0067125  | 4.5693981 ± 0.0159552  |
| 21F16593            | 24.0 % | 0.0174731 ± 0.0002374  | 0.0009485 ± 0.0064763  | 0.0028195 ± 0.0066945  | 0.0116797 ± 0.0067125  | 4.5693981 ± 0.0159552  |
| 21F16595            | 24.0 % | 0.0095007 ± 0.0066198  | 0.0071958 ± 0.0070605  | 0.0118752 ± 0.0060883  | 0.0223547 ± 0.0152731  | 2.7445671 ± 0.0145789  |
| 21F16596            | 24.0 % | 0.0095007 ± 0.0066198  | 0.0071958 ± 0.0070605  | 0.0118752 ± 0.0060883  | 0.0223547 ± 0.0152731  | 2.7445671 ± 0.0145789  |
| 21F16598            | 24.0 % | 0.0178558 ± 0.0002439  | 0.0154859 ± 0.0063063  | 0.0003306 ± 0.0064849  | 0.0045402 ± 0.0061374  | 4.7285728 ± 0.0142126  |
| 21F16599            | 24.0 % | 0.0178558 ± 0.0002439  | 0.0154859 ± 0.0063063  | 0.0003306 ± 0.0064849  | 0.0045402 ± 0.0061374  | 4.7285728 ± 0.0142126  |
| 21F16601            | 24.0 % | 0.0180658 ± 0.0002463  | 0.0076704 ± 0.0062361  | 0.0001700 ± 0.0063772  | 0.0215470 ± 0.0060685  | 4.6839398 ± 0.0158848  |
| 21F16602            | 24.0 % | 0.0180658 ± 0.0002463  | 0.0076704 ± 0.0062361  | 0.0001700 ± 0.0063772  | 0.0215470 ± 0.0060685  | 4.6839398 ± 0.0158848  |
| 21F16604            | 24.0 % | 0.0178667 ± 0.0002512  | 0.0051829 ± 0.0064491  | 0.0140195 ± 0.0063212  | 0.0154655 ± 0.0063658  | 4.6288150 ± 0.0158715  |
| 21F16605            | 24.0 % | 0.0178667 ± 0.0002512  | 0.0051829 ± 0.0064491  | 0.0140195 ± 0.0063212  | 0.0154655 ± 0.0063658  | 4.6288150 ± 0.0158715  |
| 21F16607            | 24.0 % | 0.0179443 ± 0.0002427  | 0.0151410 ± 0.0062219  | 0.0084416 ± 0.0066129  | 0.0130703 ± 0.0064780  | 4.6904255 ± 0.0166356  |
| 21F16608            | 24.0 % | 0.0179443 ± 0.0002427  | 0.0151410 ± 0.0062219  | 0.0084416 ± 0.0066129  | 0.0130703 ± 0.0064780  | 4.6904255 ± 0.0166356  |
| 21F16610            | 24.0 % | 0.0170288 ± 0.0002290  | 0.0008567 ± 0.0056965  | 0.0029321 ± 0.0068620  | 0.0128309 ± 0.0059990  | 4.5271378 ± 0.0141939  |
| 21F16611            | 24.0 % | 0.0170288 ± 0.0002290  | 0.0008567 ± 0.0056965  | 0.0029321 ± 0.0068620  | 0.0128309 ± 0.0059990  | 4.5271378 ± 0.0141939  |
| 21F16613            | 24.0 % | 0.0174731 ± 0.0002374  | 0.0009485 ± 0.0064763  | 0.0028195 ± 0.0066945  | 0.0116797 ± 0.0067125  | 4.5693981 ± 0.0159552  |
| 21F16614            | 24.0 % | 0.0174731 ± 0.0002374  | 0.0009485 ± 0.0064763  | 0.0028195 ± 0.0066945  | 0.0116797 ± 0.0067125  | 4.5693981 ± 0.0159552  |

| Intercept Values |        | 36Ar ± 1σ (SE)<br>[fA] | r2     | Regression<br>(type,n) | 37Ar ± 1σ (SE)<br>[fA] | r2     | Regression<br>(type,n) | 38Ar ± 1σ (SE)<br>[fA] | r2     | Regression<br>(type,n) | 39Ar ± 1σ (SE)<br>[fA] | r2     | Regression<br>(type,n) | 40Ar ± 1σ (SE)<br>[fA] | r2     | Regression<br>(type,n) |
|------------------|--------|------------------------|--------|------------------------|------------------------|--------|------------------------|------------------------|--------|------------------------|------------------------|--------|------------------------|------------------------|--------|------------------------|
| 21F16571         | 24.0 % | 0.0249402 ± 0.0002489  | 0.8208 | EXP 150 of 150         | 2.3987034 ± 0.0058908  | 0.9366 | EXP 148 of 150         | 0.0801081 ± 0.0068448  | 0.0699 | EXP 149 of 150         | 4.31012 ± 0.00637      | 0.9806 | EXP 147 of 150         | 20.70636 ± 0.01513     | 0.9817 | EXP 149 of 150         |
| 21F16572         | 24.0 % | 0.0635383 ± 0.0004470  | 0.5043 | EXP 150 of 150         | 2.9923414 ± 0.0063179  | 0.9537 | EXP 150 of 150         | 0.1434301 ± 0.0065205  | 0.1538 | EXP 150 of 150         | 4.98745 ± 0.00623      | 0.9840 | EXP 149 of 150         | 34.45823 ± 0.02087     | 0.9794 | EXP 150 of 150         |
| 21F16574         | 24.0 % | 0.0274546 ± 0.0002828  | 0.7736 | EXP 149 of 150         | 2.8359765 ± 0.0065523  | 0.9449 | EXP 150 of 150         | 0.0785652 ± 0.0067317  | 0.0200 | EXP 149 of 150         | 5.24719 ± 0.00717      | 0.9838 | EXP 150 of 150         | 24.83191 ± 0.01776     | 0.8722 | EXP 150 of 150         |
| 21F16575         | 24.0 % | 0.0377406 ± 0.0003428  | 0.5165 | EXP 150 of 150         | 4.1221906 ± 0.0062738  | 0.9753 | EXP 148 of 150         | 0.0919420 ± 0.0065762  | 0.0058 | EXP 150 of 150         | 6.86519 ± 0.00728      | 0.9903 | EXP 150 of 150         | 33.04234 ± 0.01625     | 0.7323 | EXP 147 of 150         |
| 21F16577         | 24.0 % | 0.0295182 ± 0.0003048  | 0.7137 | EXP 149 of 150         | 1.4526637 ± 0.0067794  | 0.7883 | EXP 150 of 150         | 0.0423196 ± 0.0065198  | 0.0003 | EXP 147 of 150         | 2.44846 ± 0.00670      | 0.9306 | EXP 149 of 150         | 15.73152 ± 0.01699     | 0.9892 | EXP 149 of 150         |
| 21F16578         | 24.0 % | 0.0281170 ± 0.0003181  | 0.7208 | EXP 150 of 150         | 4.8027278 ± 0.0061566  | 0.9832 | EXP 148 of 150         | 0.1246363 ± 0.0077803  | 0.0638 | EXP 150 of 150         | 7.87316 ± 0.00647      | 0.9943 | EXP 150 of 150         | 33.48293 ± 0.01835     | 0.5334 | EXP 150 of 150         |
| 21F16580         | 24.0 % | 0.0319728 ± 0.0002864  | 0.8358 | EXP 149 of 150         | 0.4352196 ± 0.0064878  | 0.2693 | EXP 150 of 150         | 0.6620317 ± 0.0071245  | 0.5202 | EXP 150 of 150         | 51.96108 ± 0.01068     | 0.9997 | EXP 150 of 150         | 199.73064 ± 0.02430    | 0.9998 | EXP 149 of 150         |
| 21F16581         | 24.0 % | 0.0321081 ± 0.0003189  | 0.9024 | EXP 150 of 150         | 0.2841691 ± 0.0063839  | 0.1254 | EXP 150 of 150         | 2.1351861 ± 0.0072068  | 0.9088 | EXP 150 of 150         | 175.84005 ± 0.01604    | 0.9999 | EXP 147 of 150         | 626.52192 ± 0.03674    | 1.0000 | EXP 149 of 150         |
| 21F16583         | 24.0 % | 0.0865099 ± 0.0004862  | 0.5121 | EXP 150 of 150         | 0.1614441 ± 0.0064100  | 0.0326 | EXP 150 of 150         | 1.6227354 ± 0.0068348  | 0.8780 | EXP 149 of 150         | 129.57759 ± 0.01536    | 0.9999 | EXP 149 of 150         | 481.30844 ± 0.03131    | 1.0000 | EXP 150 of 150         |
| 21F16584         | 24.0 % | 0.0497464 ± 0.0003675  | 0.5930 | EXP 150 of 150         | 4.2161572 ± 0.0071548  | 0.9703 | EXP 150 of 150         | 0.1207963 ± 0.0067219  | 0.0779 | EXP 150 of 150         | 6.97020 ± 0.00720      | 0.9893 | EXP 150 of 150         | 37.90995 ± 0.02064     | 0.8431 | EXP 150 of 150         |
| 21F16586         | 24.0 % | 0.0308434 ± 0.0003440  | 0.7321 | EXP 150 of 150         | 5.9329586 ± 0.0073235  | 0.9839 | EXP 150 of 150         | 0.1595700 ± 0.0066193  | 0.0763 | EXP 150 of 150         | 10.37703 ± 0.00740     | 0.9955 | EXP 150 of 150         | 43.05553 ± 0.01695     | 0.9543 | EXP 149 of 150         |
| 21F16587         | 24.0 % | 0.0316019 ± 0.0002793  | 0.8542 | EXP 147 of 150         | 1.9111763 ± 0.0059455  | 0.9100 | EXP 150 of 150         | 1.5174286 ± 0.0065646  | 0.8634 | EXP 150 of 150         | 126.11474 ± 0.01499    | 0.9999 | EXP 150 of 150         | 450.63988 ± 0.03226    | 0.9999 | EXP 150 of 150         |
| 21F16589         | 24.0 % | 0.2008415 ± 0.0006052  | 0.8712 | EXP 147 of 150         | 3.0711149 ± 0.0055992  | 0.9668 | EXP 149 of 150         | 0.0845304 ± 0.0066998  | 0.0233 | EXP 149 of 150         | 3.53147 ± 0.00729      | 0.9557 | EXP 150 of 150         | 73.28464 ± 0.01831     | 0.9983 | EXP 149 of 150         |
| 21F16590         | 24.0 % | 0.0276578 ± 0.0002777  | 0.7723 | EXP 150 of 150         | 4.7501620 ± 0.0067020  | 0.9788 | EXP 149 of 150         | 0.1028013 ± 0.0068740  | 0.0645 | EXP 150 of 150         | 6.79157 ± 0.00672      | 0.9914 | EXP 150 of 150         | 29.74090 ± 0.01881     | 0.4745 | EXP 150 of 150         |
| 21F16592         | 24.0 % | 0.0245014 ± 0.0002873  | 0.7555 | EXP 150 of 150         | 2.5574959 ± 0.0064611  | 0.9350 | EXP 150 of 150         | 0.0568019 ± 0.0059500  | 0.0027 | EXP 150 of 150         | 4.38389 ± 0.00671      | 0.9787 | EXP 147 of 150         | 20.97453 ± 0.01769     | 0.9712 | EXP 149 of 150         |
| 21F16593         | 24.0 % | 0.0232517 ± 0.0002751  | 0.8572 | EXP 150 of 150         | 1.2003688 ± 0.0062979  | 0.7623 | EXP 150 of 150         | 0.2207035 ± 0.0062662  | 0.1757 | EXP 150 of 150         | 15.97364 ± 0.00793     | 0.9980 | EXP 150 of 150         | 61.77301 ± 0.01793     | 0.9962 | EXP 149 of 150         |
| 21F16595         | 24.0 % | 0.0229036 ± 0.0002647  | 0.8963 | EXP 150 of 150         | 0.1070386 ± 0.0059696  | 0.0018 | EXP 150 of 150         | 0.9560695 ± 0.0067747  | 0.7230 | EXP 150 of 150         | 78.78049 ± 0.01172     | 0.9998 | EXP 150 of 150         | 282.45567 ± 0.02507    | 0.9999 | EXP 149 of 150         |
| 21F16596         | 24.0 % | 0.0310573 ± 0.0003343  | 0.8756 | EXP 150 of 150         | 0.2808994 ± 0.0054633  | 0.1592 | EXP 150 of 150         | 2.3098930 ± 0.0063945  | 0.9399 | EXP 148 of 150         | 192.90158 ± 0.01543    | 1.0000 | EXP 146 of 150         | 685.57571 ± 0.03478    | 1.0000 | EXP 148 of 150         |
| 21F16598         | 24.0 % | 0.0257953 ± 0.0002926  | 0.9308 | EXP 150 of 150         | 0.2906622 ± 0.0060023  | 0.1666 | EXP 150 of 150         | 2.2137756 ± 0.0072902  | 0.9132 | EXP 150 of 150         | 182.51747 ± 0.01967    | 0.9999 | EXP 150 of 150         | 646.84293 ± 0.03714    | 1.0000 | EXP 150 of 150         |
| 21F16599         | 24.0 % | 0.0369072 ± 0.0003144  | 0.6830 | EXP 149 of 150         | 8.1000634 ± 0.0074886  | 0.9911 | EXP 150 of 150         | 0.1750970 ± 0.0056315  | 0.0564 | EXP 149 of 150         | 14.23702 ± 0.00772     | 0.9974 | EXP 150 of 150         | 57.35218 ± 0.01641     | 0.9945 | EXP 148 of 150         |
| 21F16601         | 24.0 % | 0.0194510 ± 0.0003058  | 0.9509 | EXP 150 of 150         | 0.2224160 ± 0.0062538  | 0.0663 | EXP 150 of 150         | 1.6099629 ± 0.0072206  | 0.8643 | EXP 150 of 150         | 128.57370 ± 0.01596    | 0.9999 | EXP 150 of 150         | 456.49448 ± 0.03331    | 0.9999 | EXP 150 of 150         |
| 21F16602         | 24.0 % | 0.0295968 ± 0.0002913  | 0.8224 | EXP 150 of 150         | 2.6062733 ± 0.0061380  | 0.9477 | EXP 149 of 150         | 0.0919218 ± 0.0071905  | 0.0711 | EXP 150 of 150         | 5.15043 ± 0.00672      | 0.9814 | EXP 150 of 150         | 25.29173 ± 0.01662     | 0.9899 | EXP 149 of 150         |
| 21F16604         | 24.0 % | 0.0345120 ± 0.0003413  | 0.8650 | EXP 149 of 150         | 3.9423911 ± 0.0069720  | 0.9679 | EXP 150 of 150         | 0.1473497 ± 0.0066779  | 0.1578 | EXP 150 of 150         | 6.33642 ± 0.00694      | 0.9876 | EXP 150 of 150         | 29.99884 ± 0.01868     | 0.9939 | EXP 150 of 150         |
| 21F16605         | 24.0 % | 0.0395880 ± 0.0003166  | 0.5605 | EXP 150 of 150         | 3.1640730 ± 0.0058066  | 0.9646 | EXP 150 of 150         | 0.0718235 ± 0.0063972  | 0.0002 | EXP 148 of 150         | 5.30953 ± 0.00717      | 0.9830 | EXP 148 of 150         | 28.71208 ± 0.01745     | 0.8877 | EXP 150 of 150         |
| 21F16607         | 24.0 % | 0.0207563 ± 0.0002691  | 0.9161 | EXP 150 of 150         | 0.1130854 ± 0.0064969  | 0.0021 | EXP 150 of 150         | 0.9510686 ± 0.0057340  | 0.7475 | EXP 148 of 150         | 77.56224 ± 0.01191     | 0.9998 | EXP 150 of 150         | 277.61212 ± 0.02438    | 0.9999 | EXP 148 of 150         |
| 21F16608         | 24.0 % | 0.0230250 ± 0.0002485  | 0.8881 | EXP 148 of 150         | 0.0937843 ± 0.0060623  | 0.0221 | EXP 150 of 150         | 0.7653805 ± 0.0069447  | 0.6411 | EXP 149 of 150         | 61.99721 ± 0.01053     | 0.9998 | EXP 149 of 150         | 224.10101 ± 0.02749    | 0.9998 | EXP 150 of 150         |
| 21F16610         | 24.0 % | 0.0371083 ± 0.0003049  | 0.8615 | EXP 148 of 150         | 0.5565347 ± 0.0067233  | 0.3783 | EXP 150 of 150         | 1.6939132 ± 0.0068834  | 0.8761 | EXP 149 of 150         | 138.89866 ± 0.01515    | 0.9999 | EXP 147 of 150         | 498.42786 ± 0.03568    | 0.9999 | EXP 150 of 150         |
| 21F16611         | 24.0 % | 0.0229616 ± 0.0002248  | 0.8566 | EXP 148 of 150         | 2.6142784 ± 0.0065339  | 0.9379 | EXP 150 of 150         | 0.0615294 ± 0.0060740  | 0.0033 | EXP 150 of 150         | 4.42689 ± 0.00726      | 0.9714 | EXP 150 of 150         | 20.45668 ± 0.01765     | 0.9827 | EXP 150 of 150         |
| 21F16613         | 24.0 % | 0.0411461 ± 0.0003088  | 0.7606 | EXP 150 of 150         | 2.3692963 ± 0.0076664  | 0.9004 | EXP 148 of 150         | 0.0733300 ± 0.0063025  | 0.0029 | EXP 149 of 150         | 3.75318 ± 0.00649      | 0.9651 | EXP 150 of 150         | 24.21206 ± 0.01477     | 0.9931 | EXP 148 of 150         |
| 21F16614         | 24.0 % | 0.0279233 ± 0.0002751  | 0.9063 | EXP 148 of 150         | 0.2047229 ± 0.0053858  | 0.0945 | EXP 150 of 150         | 1.5716823 ± 0.0063661  | 0.8767 | EXP 150 of 150         | 128.36849 ± 0.01448    | 0.9999 | EXP 147 of 150         | 458.15154 ± 0.02867    | 1.0000 | EXP 148 of 150         |



| Project Info |        | Analyst     | Irradiation | X-pos | Y-pos | Z/H-pos | Project                | Experiment | Nmb |
|--------------|--------|-------------|-------------|-------|-------|---------|------------------------|------------|-----|
| 21F16571     | 24.0 % | Dan Miggins | 21-OSU-04   | 0.00  | 0.00  | 12.30   | Oregon\Swenton (20-01) | 21F16567   | 01  |
| 21F16572     | 24.0 % | Dan Miggins | 21-OSU-04   | 0.00  | 0.00  | 12.30   | Oregon\Swenton (20-01) | 21F16567   | 01  |
| 21F16574     | 24.0 % | Dan Miggins | 21-OSU-04   | 0.00  | 0.00  | 12.30   | Oregon\Swenton (20-01) | 21F16567   | 01  |
| 21F16575     | 24.0 % | Dan Miggins | 21-OSU-04   | 0.00  | 0.00  | 12.30   | Oregon\Swenton (20-01) | 21F16567   | 01  |
| 21F16577     | 24.0 % | Dan Miggins | 21-OSU-04   | 0.00  | 0.00  | 12.30   | Oregon\Swenton (20-01) | 21F16567   | 01  |
| 21F16578     | 24.0 % | Dan Miggins | 21-OSU-04   | 0.00  | 0.00  | 12.30   | Oregon\Swenton (20-01) | 21F16567   | 01  |
| 21F16580     | 24.0 % | Dan Miggins | 21-OSU-04   | 0.00  | 0.00  | 12.30   | Oregon\Swenton (20-01) | 21F16567   | 01  |
| 21F16581     | 24.0 % | Dan Miggins | 21-OSU-04   | 0.00  | 0.00  | 12.30   | Oregon\Swenton (20-01) | 21F16567   | 01  |
| 21F16583     | 24.0 % | Dan Miggins | 21-OSU-04   | 0.00  | 0.00  | 12.30   | Oregon\Swenton (20-01) | 21F16567   | 01  |
| 21F16584     | 24.0 % | Dan Miggins | 21-OSU-04   | 0.00  | 0.00  | 12.30   | Oregon\Swenton (20-01) | 21F16567   | 01  |
| 21F16586     | 24.0 % | Dan Miggins | 21-OSU-04   | 0.00  | 0.00  | 12.30   | Oregon\Swenton (20-01) | 21F16567   | 01  |
| 21F16587     | 24.0 % | Dan Miggins | 21-OSU-04   | 0.00  | 0.00  | 12.30   | Oregon\Swenton (20-01) | 21F16567   | 01  |
| 21F16589     | 24.0 % | Dan Miggins | 21-OSU-04   | 0.00  | 0.00  | 12.30   | Oregon\Swenton (20-01) | 21F16567   | 01  |
| 21F16590     | 24.0 % | Dan Miggins | 21-OSU-04   | 0.00  | 0.00  | 12.30   | Oregon\Swenton (20-01) | 21F16567   | 01  |
| 21F16592     | 24.0 % | Dan Miggins | 21-OSU-04   | 0.00  | 0.00  | 12.30   | Oregon\Swenton (20-01) | 21F16567   | 01  |
| 21F16593     | 24.0 % | Dan Miggins | 21-OSU-04   | 0.00  | 0.00  | 12.30   | Oregon\Swenton (20-01) | 21F16567   | 01  |
| 21F16595     | 24.0 % | Dan Miggins | 21-OSU-04   | 0.00  | 0.00  | 12.30   | Oregon\Swenton (20-01) | 21F16567   | 01  |
| 21F16596     | 24.0 % | Dan Miggins | 21-OSU-04   | 0.00  | 0.00  | 12.30   | Oregon\Swenton (20-01) | 21F16567   | 01  |
| 21F16598     | 24.0 % | Dan Miggins | 21-OSU-04   | 0.00  | 0.00  | 12.30   | Oregon\Swenton (20-01) | 21F16567   | 01  |
| 21F16599     | 24.0 % | Dan Miggins | 21-OSU-04   | 0.00  | 0.00  | 12.30   | Oregon\Swenton (20-01) | 21F16567   | 01  |
| 21F16601     | 24.0 % | Dan Miggins | 21-OSU-04   | 0.00  | 0.00  | 12.30   | Oregon\Swenton (20-01) | 21F16567   | 01  |
| 21F16602     | 24.0 % | Dan Miggins | 21-OSU-04   | 0.00  | 0.00  | 12.30   | Oregon\Swenton (20-01) | 21F16567   | 01  |
| 21F16604     | 24.0 % | Dan Miggins | 21-OSU-04   | 0.00  | 0.00  | 12.30   | Oregon\Swenton (20-01) | 21F16567   | 01  |
| 21F16605     | 24.0 % | Dan Miggins | 21-OSU-04   | 0.00  | 0.00  | 12.30   | Oregon\Swenton (20-01) | 21F16567   | 01  |
| 21F16607     | 24.0 % | Dan Miggins | 21-OSU-04   | 0.00  | 0.00  | 12.30   | Oregon\Swenton (20-01) | 21F16567   | 01  |
| 21F16608     | 24.0 % | Dan Miggins | 21-OSU-04   | 0.00  | 0.00  | 12.30   | Oregon\Swenton (20-01) | 21F16567   | 01  |
| 21F16610     | 24.0 % | Dan Miggins | 21-OSU-04   | 0.00  | 0.00  | 12.30   | Oregon\Swenton (20-01) | 21F16567   | 01  |
| 21F16611     | 24.0 % | Dan Miggins | 21-OSU-04   | 0.00  | 0.00  | 12.30   | Oregon\Swenton (20-01) | 21F16567   | 01  |
| 21F16613     | 24.0 % | Dan Miggins | 21-OSU-04   | 0.00  | 0.00  | 12.30   | Oregon\Swenton (20-01) | 21F16567   | 01  |
| 21F16614     | 24.0 % | Dan Miggins | 21-OSU-04   | 0.00  | 0.00  | 12.30   | Oregon\Swenton (20-01) | 21F16567   | 01  |



| Sample Parameters |        | Sample   | Material | Location   | Standard Name    | Standard (in Ma) | %1σ   | Standard Reference  | Standard 40Ar/39Ar | %1σ   | J          | %1σ   | Air 40Ar/36Ar | %1σ   | MDF (lin)  | %1σ   | Volume Ratio | Sensitivity (mol/volt) | Day | Month | Year | Hour | Min | Resist |
|-------------------|--------|----------|----------|------------|------------------|------------------|-------|---------------------|--------------------|-------|------------|-------|---------------|-------|------------|-------|--------------|------------------------|-----|-------|------|------|-----|--------|
| 21F16571          | 24.0 % | VS19-085 | Sanidine | Circle Bar | FCT-NM (4X12-21) | 28.201           | 0.082 | Kuiper et al (2008) | 9.40558            | 0.113 | 0.00165067 | 0.113 | 300.921       | 0.112 | 0.99803599 | 0.038 | 1            | 3.54E-14               | 5   | SEP   | 2021 | 4    | 26  | 1      |
| 21F16572          | 24.0 % | VS19-085 | Sanidine | Circle Bar | FCT-NM (4X12-21) | 28.201           | 0.082 | Kuiper et al (2008) | 9.40558            | 0.113 | 0.00165067 | 0.113 | 300.921       | 0.112 | 0.99803599 | 0.038 | 1            | 3.54E-14               | 5   | SEP   | 2021 | 4    | 35  | 1      |
| 21F16574          | 24.0 % | VS19-085 | Sanidine | Circle Bar | FCT-NM (4X12-21) | 28.201           | 0.082 | Kuiper et al (2008) | 9.40558            | 0.113 | 0.00165067 | 0.113 | 300.921       | 0.112 | 0.99803599 | 0.038 | 1            | 3.54E-14               | 5   | SEP   | 2021 | 4    | 52  | 1      |
| 21F16575          | 24.0 % | VS19-085 | Sanidine | Circle Bar | FCT-NM (4X12-21) | 28.201           | 0.082 | Kuiper et al (2008) | 9.40558            | 0.113 | 0.00165067 | 0.113 | 300.921       | 0.112 | 0.99803599 | 0.038 | 1            | 3.54E-14               | 5   | SEP   | 2021 | 5    | 1   | 1      |
| 21F16577          | 24.0 % | VS19-085 | Sanidine | Circle Bar | FCT-NM (4X12-21) | 28.201           | 0.082 | Kuiper et al (2008) | 9.40558            | 0.113 | 0.00165067 | 0.113 | 300.921       | 0.112 | 0.99803599 | 0.038 | 1            | 3.54E-14               | 5   | SEP   | 2021 | 5    | 18  | 1      |
| 21F16578          | 24.0 % | VS19-085 | Sanidine | Circle Bar | FCT-NM (4X12-21) | 28.201           | 0.082 | Kuiper et al (2008) | 9.40558            | 0.113 | 0.00165067 | 0.113 | 300.921       | 0.112 | 0.99803599 | 0.038 | 1            | 3.54E-14               | 5   | SEP   | 2021 | 5    | 27  | 1      |
| 21F16580          | 24.0 % | VS19-085 | Sanidine | Circle Bar | FCT-NM (4X12-21) | 28.201           | 0.082 | Kuiper et al (2008) | 9.40558            | 0.113 | 0.00165067 | 0.113 | 300.921       | 0.112 | 0.99803599 | 0.038 | 1            | 3.54E-14               | 5   | SEP   | 2021 | 5    | 44  | 1      |
| 21F16581          | 24.0 % | VS19-085 | Sanidine | Circle Bar | FCT-NM (4X12-21) | 28.201           | 0.082 | Kuiper et al (2008) | 9.40558            | 0.113 | 0.00165067 | 0.113 | 300.921       | 0.112 | 0.99803599 | 0.038 | 1            | 3.54E-14               | 5   | SEP   | 2021 | 5    | 53  | 1      |
| 21F16583          | 24.0 % | VS19-085 | Sanidine | Circle Bar | FCT-NM (4X12-21) | 28.201           | 0.082 | Kuiper et al (2008) | 9.40558            | 0.113 | 0.00165067 | 0.113 | 300.921       | 0.112 | 0.99803599 | 0.038 | 1            | 3.54E-14               | 5   | SEP   | 2021 | 6    | 10  | 1      |
| 21F16584          | 24.0 % | VS19-085 | Sanidine | Circle Bar | FCT-NM (4X12-21) | 28.201           | 0.082 | Kuiper et al (2008) | 9.40558            | 0.113 | 0.00165067 | 0.113 | 300.921       | 0.112 | 0.99803599 | 0.038 | 1            | 3.54E-14               | 5   | SEP   | 2021 | 6    | 18  | 1      |
| 21F16586          | 24.0 % | VS19-085 | Sanidine | Circle Bar | FCT-NM (4X12-21) | 28.201           | 0.082 | Kuiper et al (2008) | 9.40558            | 0.113 | 0.00165067 | 0.113 | 300.921       | 0.112 | 0.99803599 | 0.038 | 1            | 3.54E-14               | 5   | SEP   | 2021 | 6    | 36  | 1      |
| 21F16587          | 24.0 % | VS19-085 | Sanidine | Circle Bar | FCT-NM (4X12-21) | 28.201           | 0.082 | Kuiper et al (2008) | 9.40558            | 0.113 | 0.00165067 | 0.113 | 300.921       | 0.112 | 0.99803599 | 0.038 | 1            | 3.54E-14               | 5   | SEP   | 2021 | 6    | 44  | 1      |
| 21F16589          | 24.0 % | VS19-085 | Sanidine | Circle Bar | FCT-NM (4X12-21) | 28.201           | 0.082 | Kuiper et al (2008) | 9.40558            | 0.113 | 0.00165067 | 0.113 | 300.921       | 0.112 | 0.99803599 | 0.038 | 1            | 3.54E-14               | 5   | SEP   | 2021 | 7    | 2   | 1      |
| 21F16590          | 24.0 % | VS19-085 | Sanidine | Circle Bar | FCT-NM (4X12-21) | 28.201           | 0.082 | Kuiper et al (2008) | 9.40558            | 0.113 | 0.00165067 | 0.113 | 300.921       | 0.112 | 0.99803599 | 0.038 | 1            | 3.54E-14               | 5   | SEP   | 2021 | 7    | 10  | 1      |
| 21F16592          | 24.0 % | VS19-085 | Sanidine | Circle Bar | FCT-NM (4X12-21) | 28.201           | 0.082 | Kuiper et al (2008) | 9.40558            | 0.113 | 0.00165067 | 0.113 | 300.921       | 0.112 | 0.99803599 | 0.038 | 1            | 3.54E-14               | 5   | SEP   | 2021 | 7    | 28  | 1      |
| 21F16593          | 24.0 % | VS19-085 | Sanidine | Circle Bar | FCT-NM (4X12-21) | 28.201           | 0.082 | Kuiper et al (2008) | 9.40558            | 0.113 | 0.00165067 | 0.113 | 300.921       | 0.112 | 0.99803599 | 0.038 | 1            | 3.54E-14               | 5   | SEP   | 2021 | 7    | 36  | 1      |
| 21F16595          | 24.0 % | VS19-085 | Sanidine | Circle Bar | FCT-NM (4X12-21) | 28.201           | 0.082 | Kuiper et al (2008) | 9.40558            | 0.113 | 0.00165067 | 0.113 | 300.921       | 0.112 | 0.99803599 | 0.038 | 1            | 3.54E-14               | 5   | SEP   | 2021 | 7    | 53  | 1      |
| 21F16596          | 24.0 % | VS19-085 | Sanidine | Circle Bar | FCT-NM (4X12-21) | 28.201           | 0.082 | Kuiper et al (2008) | 9.40558            | 0.113 | 0.00165067 | 0.113 | 300.921       | 0.112 | 0.99803599 | 0.038 | 1            | 3.54E-14               | 5   | SEP   | 2021 | 8    | 2   | 1      |
| 21F16598          | 24.0 % | VS19-085 | Sanidine | Circle Bar | FCT-NM (4X12-21) | 28.201           | 0.082 | Kuiper et al (2008) | 9.40558            | 0.113 | 0.00165067 | 0.113 | 300.921       | 0.112 | 0.99803599 | 0.038 | 1            | 3.54E-14               | 5   | SEP   | 2021 | 8    | 19  | 1      |
| 21F16599          | 24.0 % | VS19-085 | Sanidine | Circle Bar | FCT-NM (4X12-21) | 28.201           | 0.082 | Kuiper et al (2008) | 9.40558            | 0.113 | 0.00165067 | 0.113 | 300.921       | 0.112 | 0.99803599 | 0.038 | 1            | 3.54E-14               | 5   | SEP   | 2021 | 8    | 28  | 1      |
| 21F16601          | 24.0 % | VS19-085 | Sanidine | Circle Bar | FCT-NM (4X12-21) | 28.201           | 0.082 | Kuiper et al (2008) | 9.40558            | 0.113 | 0.00165067 | 0.113 | 300.921       | 0.112 | 0.99803599 | 0.038 | 1            | 3.54E-14               | 5   | SEP   | 2021 | 8    | 45  | 1      |
| 21F16602          | 24.0 % | VS19-085 | Sanidine | Circle Bar | FCT-NM (4X12-21) | 28.201           | 0.082 | Kuiper et al (2008) | 9.40558            | 0.113 | 0.00165067 | 0.113 | 300.921       | 0.112 | 0.99803599 | 0.038 | 1            | 3.54E-14               | 5   | SEP   | 2021 | 8    | 54  | 1      |
| 21F16604          | 24.0 % | VS19-085 | Sanidine | Circle Bar | FCT-NM (4X12-21) | 28.201           | 0.082 | Kuiper et al (2008) | 9.40558            | 0.113 | 0.00165067 | 0.113 | 300.921       | 0.112 | 0.99803599 | 0.038 | 1            | 3.54E-14               | 5   | SEP   | 2021 | 9    | 11  | 1      |
| 21F16605          | 24.0 % | VS19-085 | Sanidine | Circle Bar | FCT-NM (4X12-21) | 28.201           | 0.082 | Kuiper et al (2008) | 9.40558            | 0.113 | 0.00165067 | 0.113 | 300.921       | 0.112 | 0.99803599 | 0.038 | 1            | 3.54E-14               | 5   | SEP   | 2021 | 9    | 20  | 1      |
| 21F16607          | 24.0 % | VS19-085 | Sanidine | Circle Bar | FCT-NM (4X12-21) | 28.201           | 0.082 | Kuiper et al (2008) | 9.40558            | 0.113 | 0.00165067 | 0.113 | 300.921       | 0.112 | 0.99803599 | 0.038 | 1            | 3.54E-14               | 5   | SEP   | 2021 | 9    | 37  | 1      |
| 21F16608          | 24.0 % | VS19-085 | Sanidine | Circle Bar | FCT-NM (4X12-21) | 28.201           | 0.082 | Kuiper et al (2008) | 9.40558            | 0.113 | 0.00165067 | 0.113 | 300.921       | 0.112 | 0.99803599 | 0.038 | 1            | 3.54E-14               | 5   | SEP   | 2021 | 9    | 46  | 1      |
| 21F16610          | 24.0 % | VS19-085 | Sanidine | Circle Bar | FCT-NM (4X12-21) | 28.201           | 0.082 | Kuiper et al (2008) | 9.40558            | 0.113 | 0.00165067 | 0.113 | 300.921       | 0.112 | 0.99803599 | 0.038 | 1            | 3.54E-14               | 5   | SEP   | 2021 | 10   | 3   | 1      |
| 21F16611          | 24.0 % | VS19-085 | Sanidine | Circle Bar | FCT-NM (4X12-21) | 28.201           | 0.082 | Kuiper et al (2008) | 9.40558            | 0.113 | 0.00165067 | 0.113 | 300.921       | 0.112 | 0.99803599 | 0.038 | 1            | 3.54E-14               | 5   | SEP   | 2021 | 10   | 12  | 1      |
| 21F16613          | 24.0 % | VS19-085 | Sanidine | Circle Bar | FCT-NM (4X12-21) | 28.201           | 0.082 | Kuiper et al (2008) | 9.40558            | 0.113 | 0.00165067 | 0.113 | 300.921       | 0.112 | 0.99803599 | 0.038 | 1            | 3.54E-14               | 5   | SEP   | 2021 | 10   | 29  | 1      |
| 21F16614          | 24.0 % | VS19-085 | Sanidine | Circle Bar | FCT-NM (4X12-21) | 28.201           | 0.082 | Kuiper et al (2008) | 9.40558            | 0.113 | 0.00165067 | 0.113 | 300.921       | 0.112 | 0.99803599 | 0.038 | 1            | 3.54E-14               | 5   | SEP   | 2021 | 10   | 37  | 1      |



21F16567.AGE >>> VS19-085 >>> OREGON | SWENTON (20-01) PROJECT

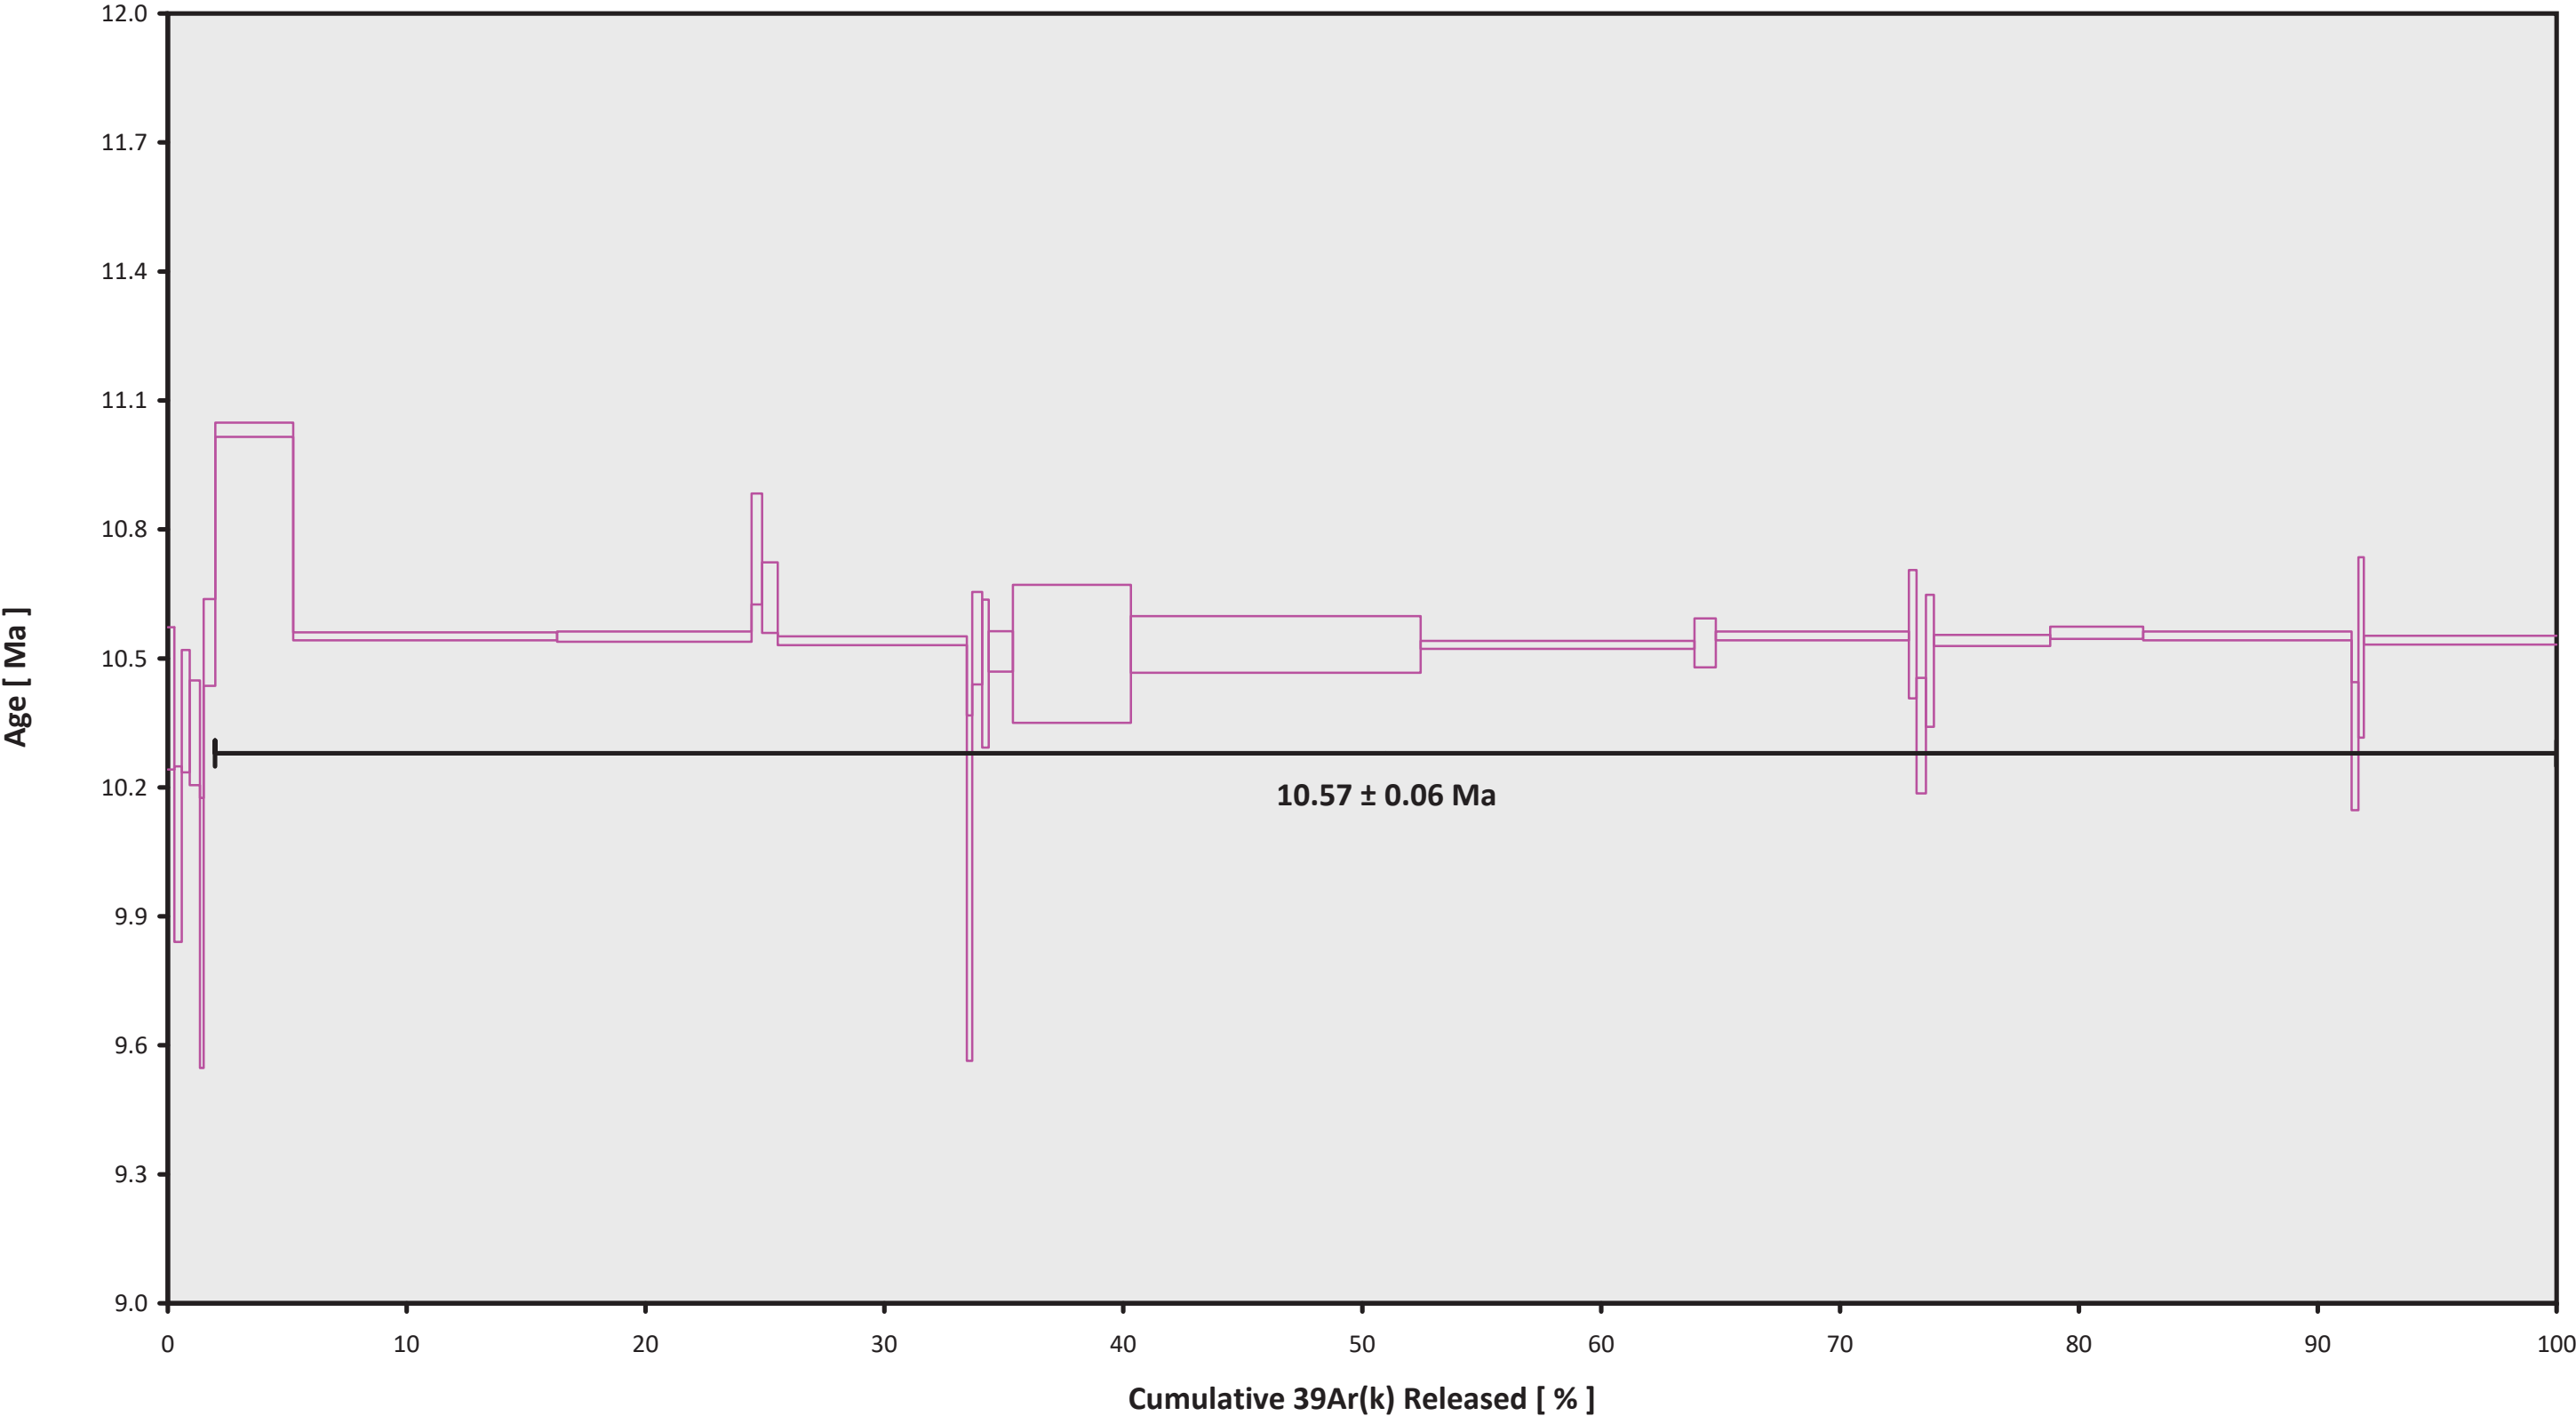

Ar-Ages in Ma

WEIGHTED PLATEAU

$10.57 \pm 0.06$

TOTAL FUSION

$10.55 \pm 0.03$

NORMAL ISOCHRON

$10.55 \pm 0.04$

INVERSE ISOCHRON

$10.51 \pm 0.08$

MSWD (PROBABILITY)

> 100 (0%)

ASSUMED TRAPPED  $^{40}\text{Ar}/^{36}\text{Ar}$  RATIO

Standard  $40/36 = 298.56 \pm 0.104 \text{ \%SD}$

Sample Info

Sanidine

Circle Bar

Dan Miggins

IRR = 21-OSU-04 (4X12-21)

$J = 0.00165067 \pm 0.00000187$

21F16567.AGE >>> VS19-085 >>> OREGON | SWENTON (20-01) PROJECT

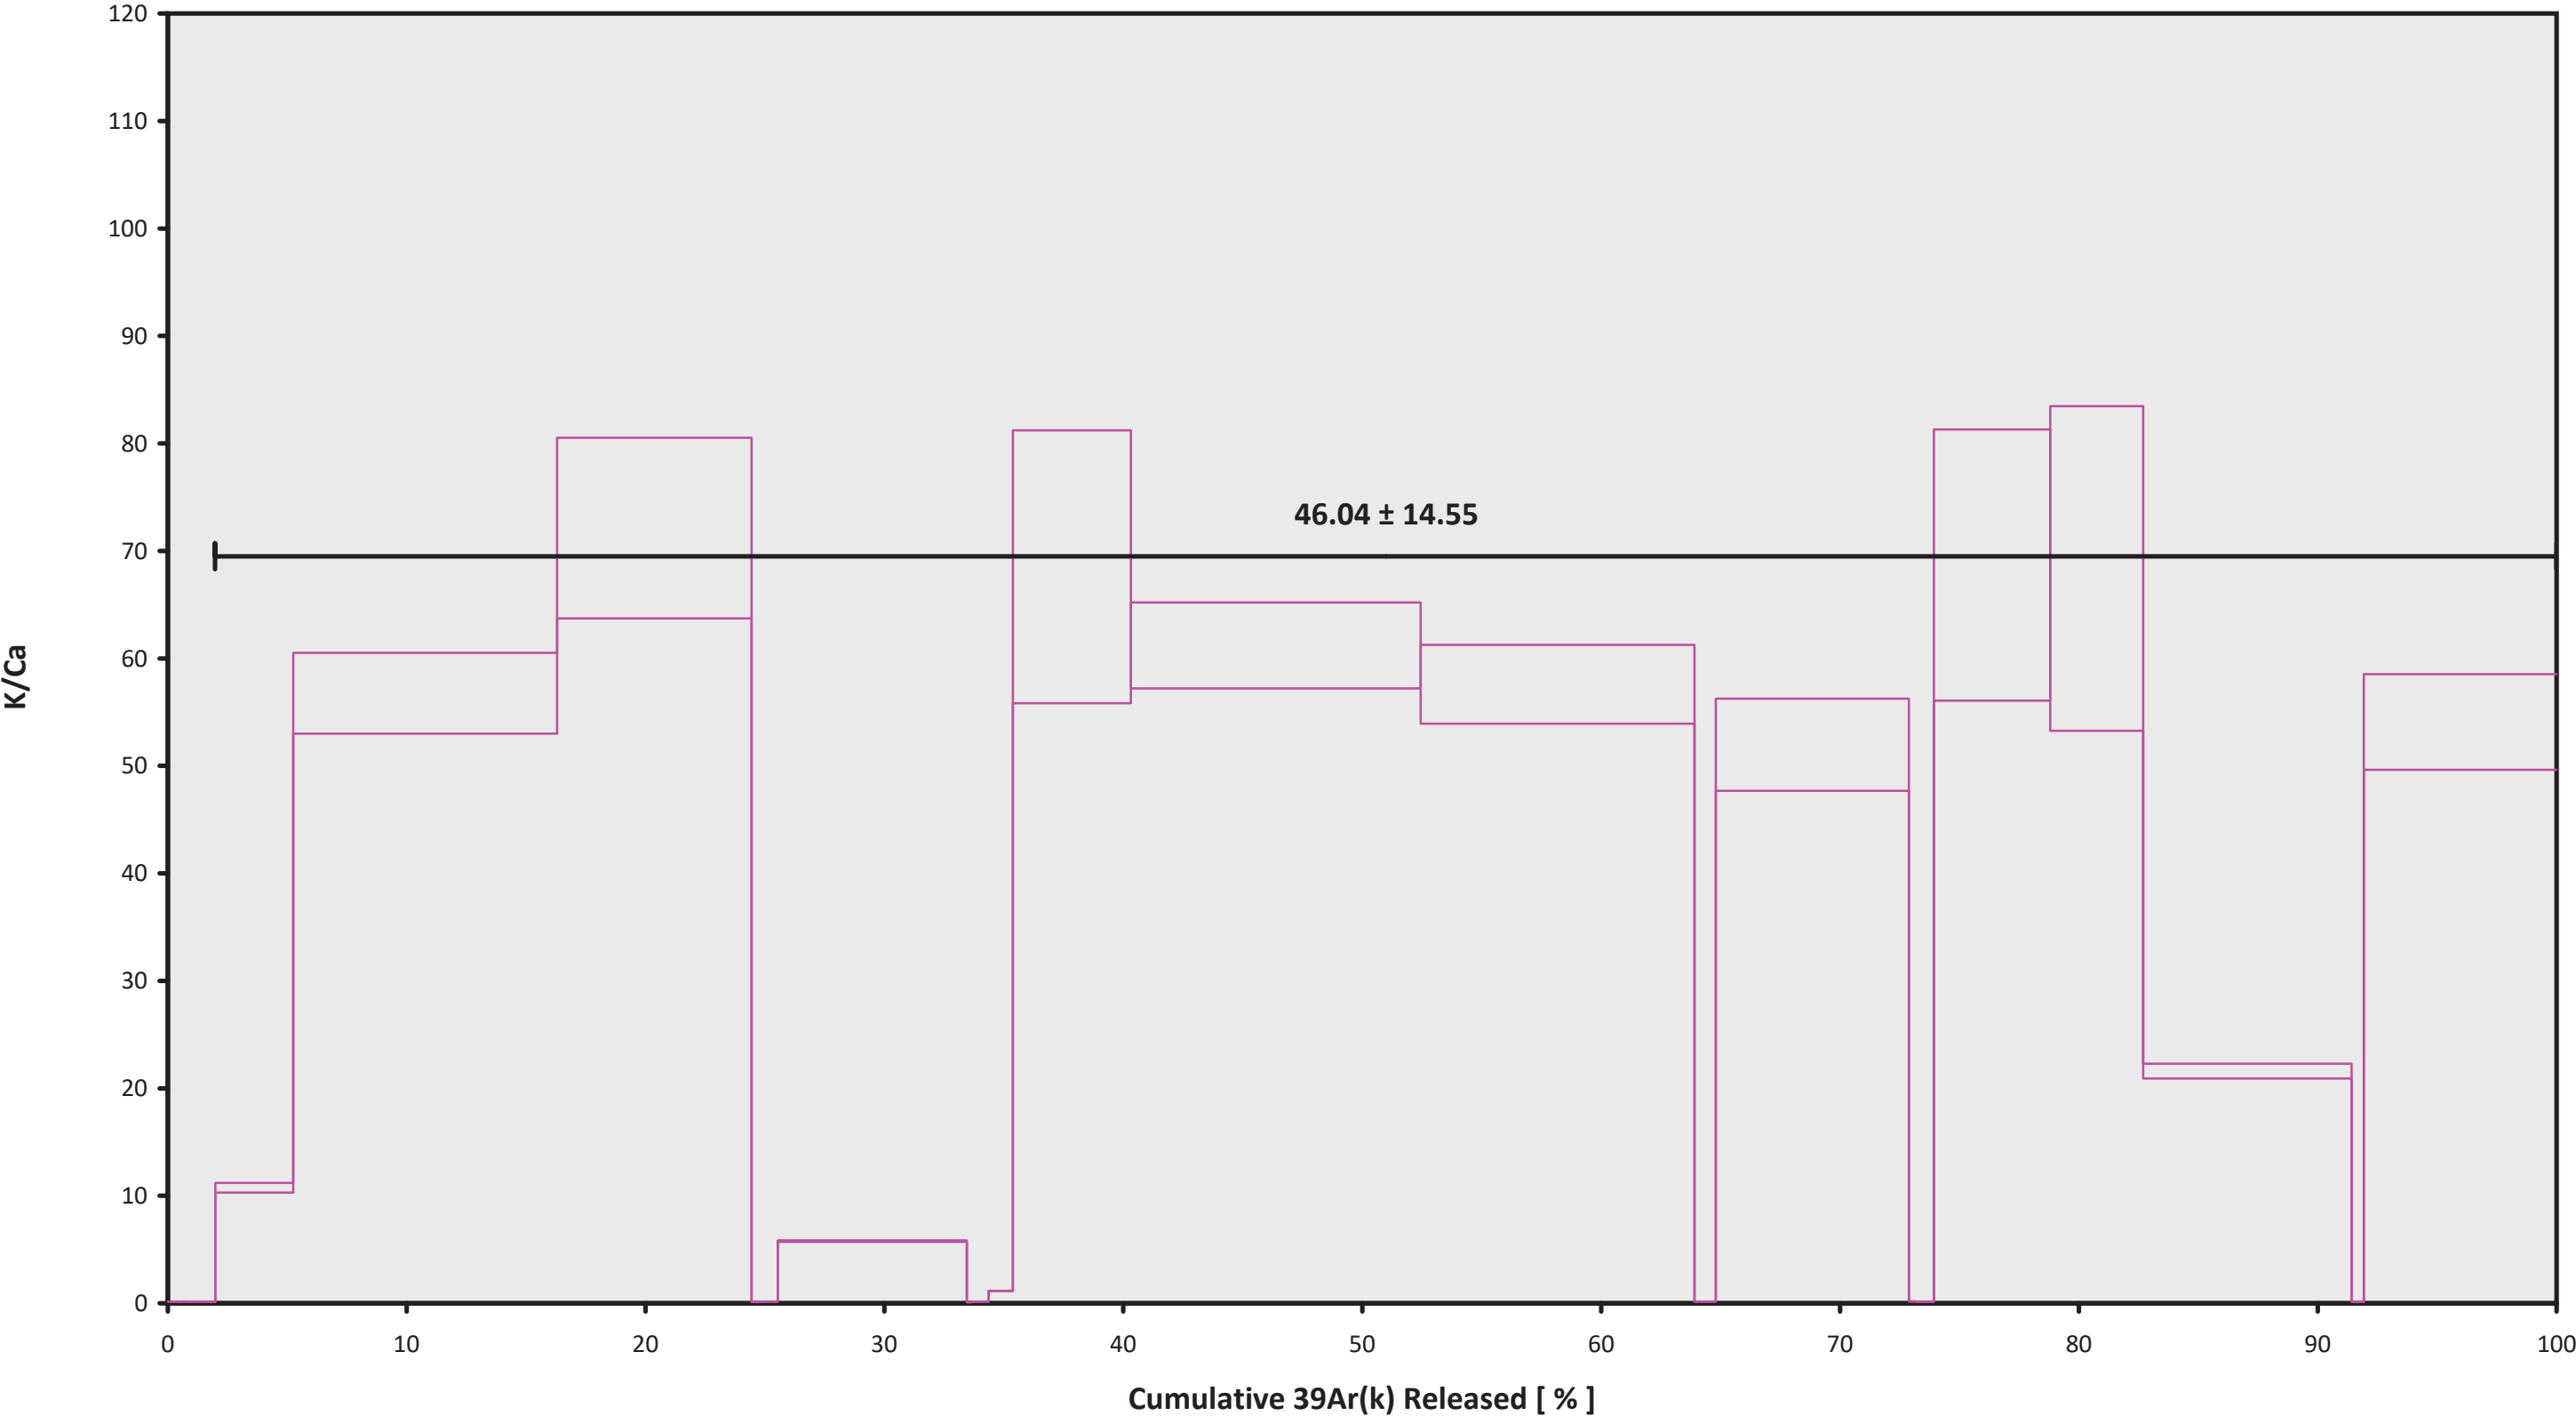

**Ar-Ages in Ma**

**WEIGHTED PLATEAU**

**10.57 ± 0.06**

**TOTAL FUSION**

**10.55 ± 0.03**

**NORMAL ISOCHRON**

**10.55 ± 0.04**

**INVERSE ISOCHRON**

**10.51 ± 0.08**

**ASSUMED TRAPPED  $^{40}\text{Ar}/^{36}\text{Ar}$  RATIO**

**Standard  $^{40}/^{36} = 298.56 \pm 0.104$  %SD**

**Sample Info**

**Sanidine**

**Circle Bar**

**Dan Miggins**

**IRR = 21-OSU-04 (4X12-21)**

**J = 0.00165067 ± 0.00000187**

21F16567.AGE >>> VS19-085 >>> OREGON | SWENTON (20-01) PROJECT

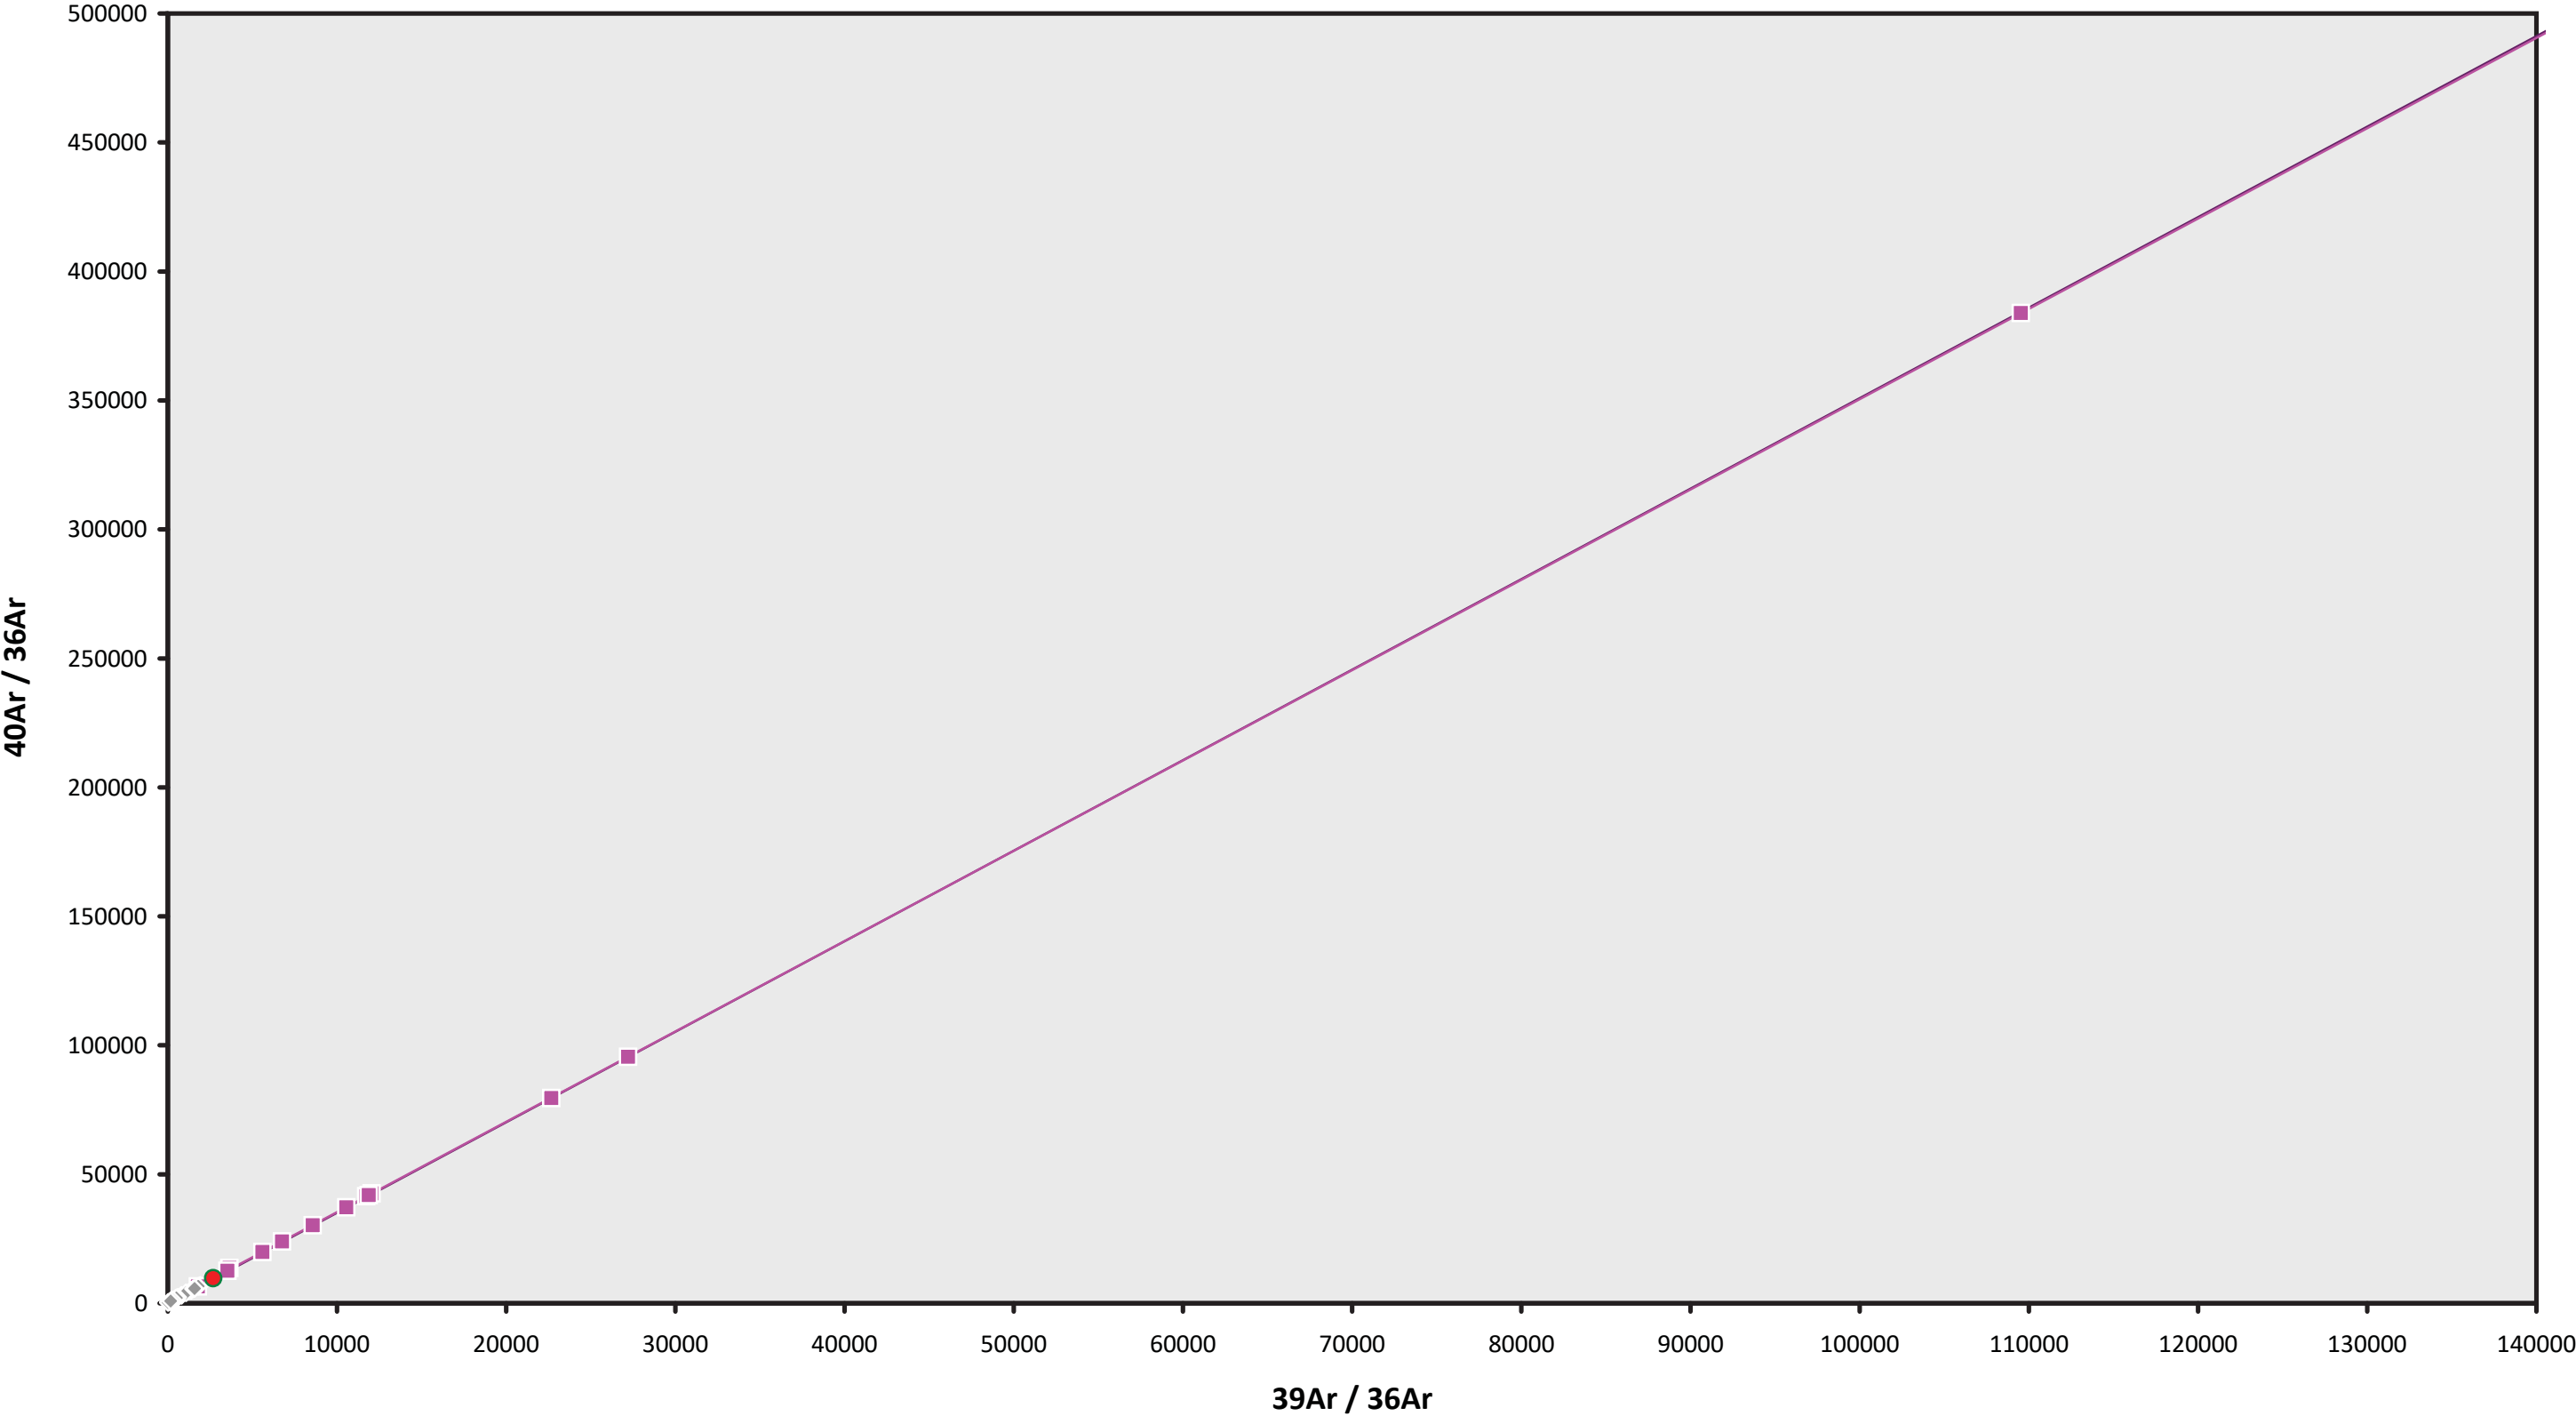

Ar-Ages in Ma

WEIGHTED PLATEAU

$10.57 \pm 0.06$

TOTAL FUSION

$10.55 \pm 0.03$

NORMAL ISOCHRON

$10.55 \pm 0.04$

INVERSE ISOCHRON

$10.51 \pm 0.08$

MSWD (PROBABILITY)

55.52 (0%)

CALCULATED  $^{40}\text{Ar}/^{36}\text{Ar}$  INTERCEPT

$305.7 \pm 60.6$

Sample Info

Sanidine

Circle Bar

Dan Miggins

IRR = 21-OSU-04 (4X12-21)

$J = 0.00165067 \pm 0.00000187$

21F16567.AGE >>> VS19-085 >>> OREGON | SWENTON (20-01) PROJECT

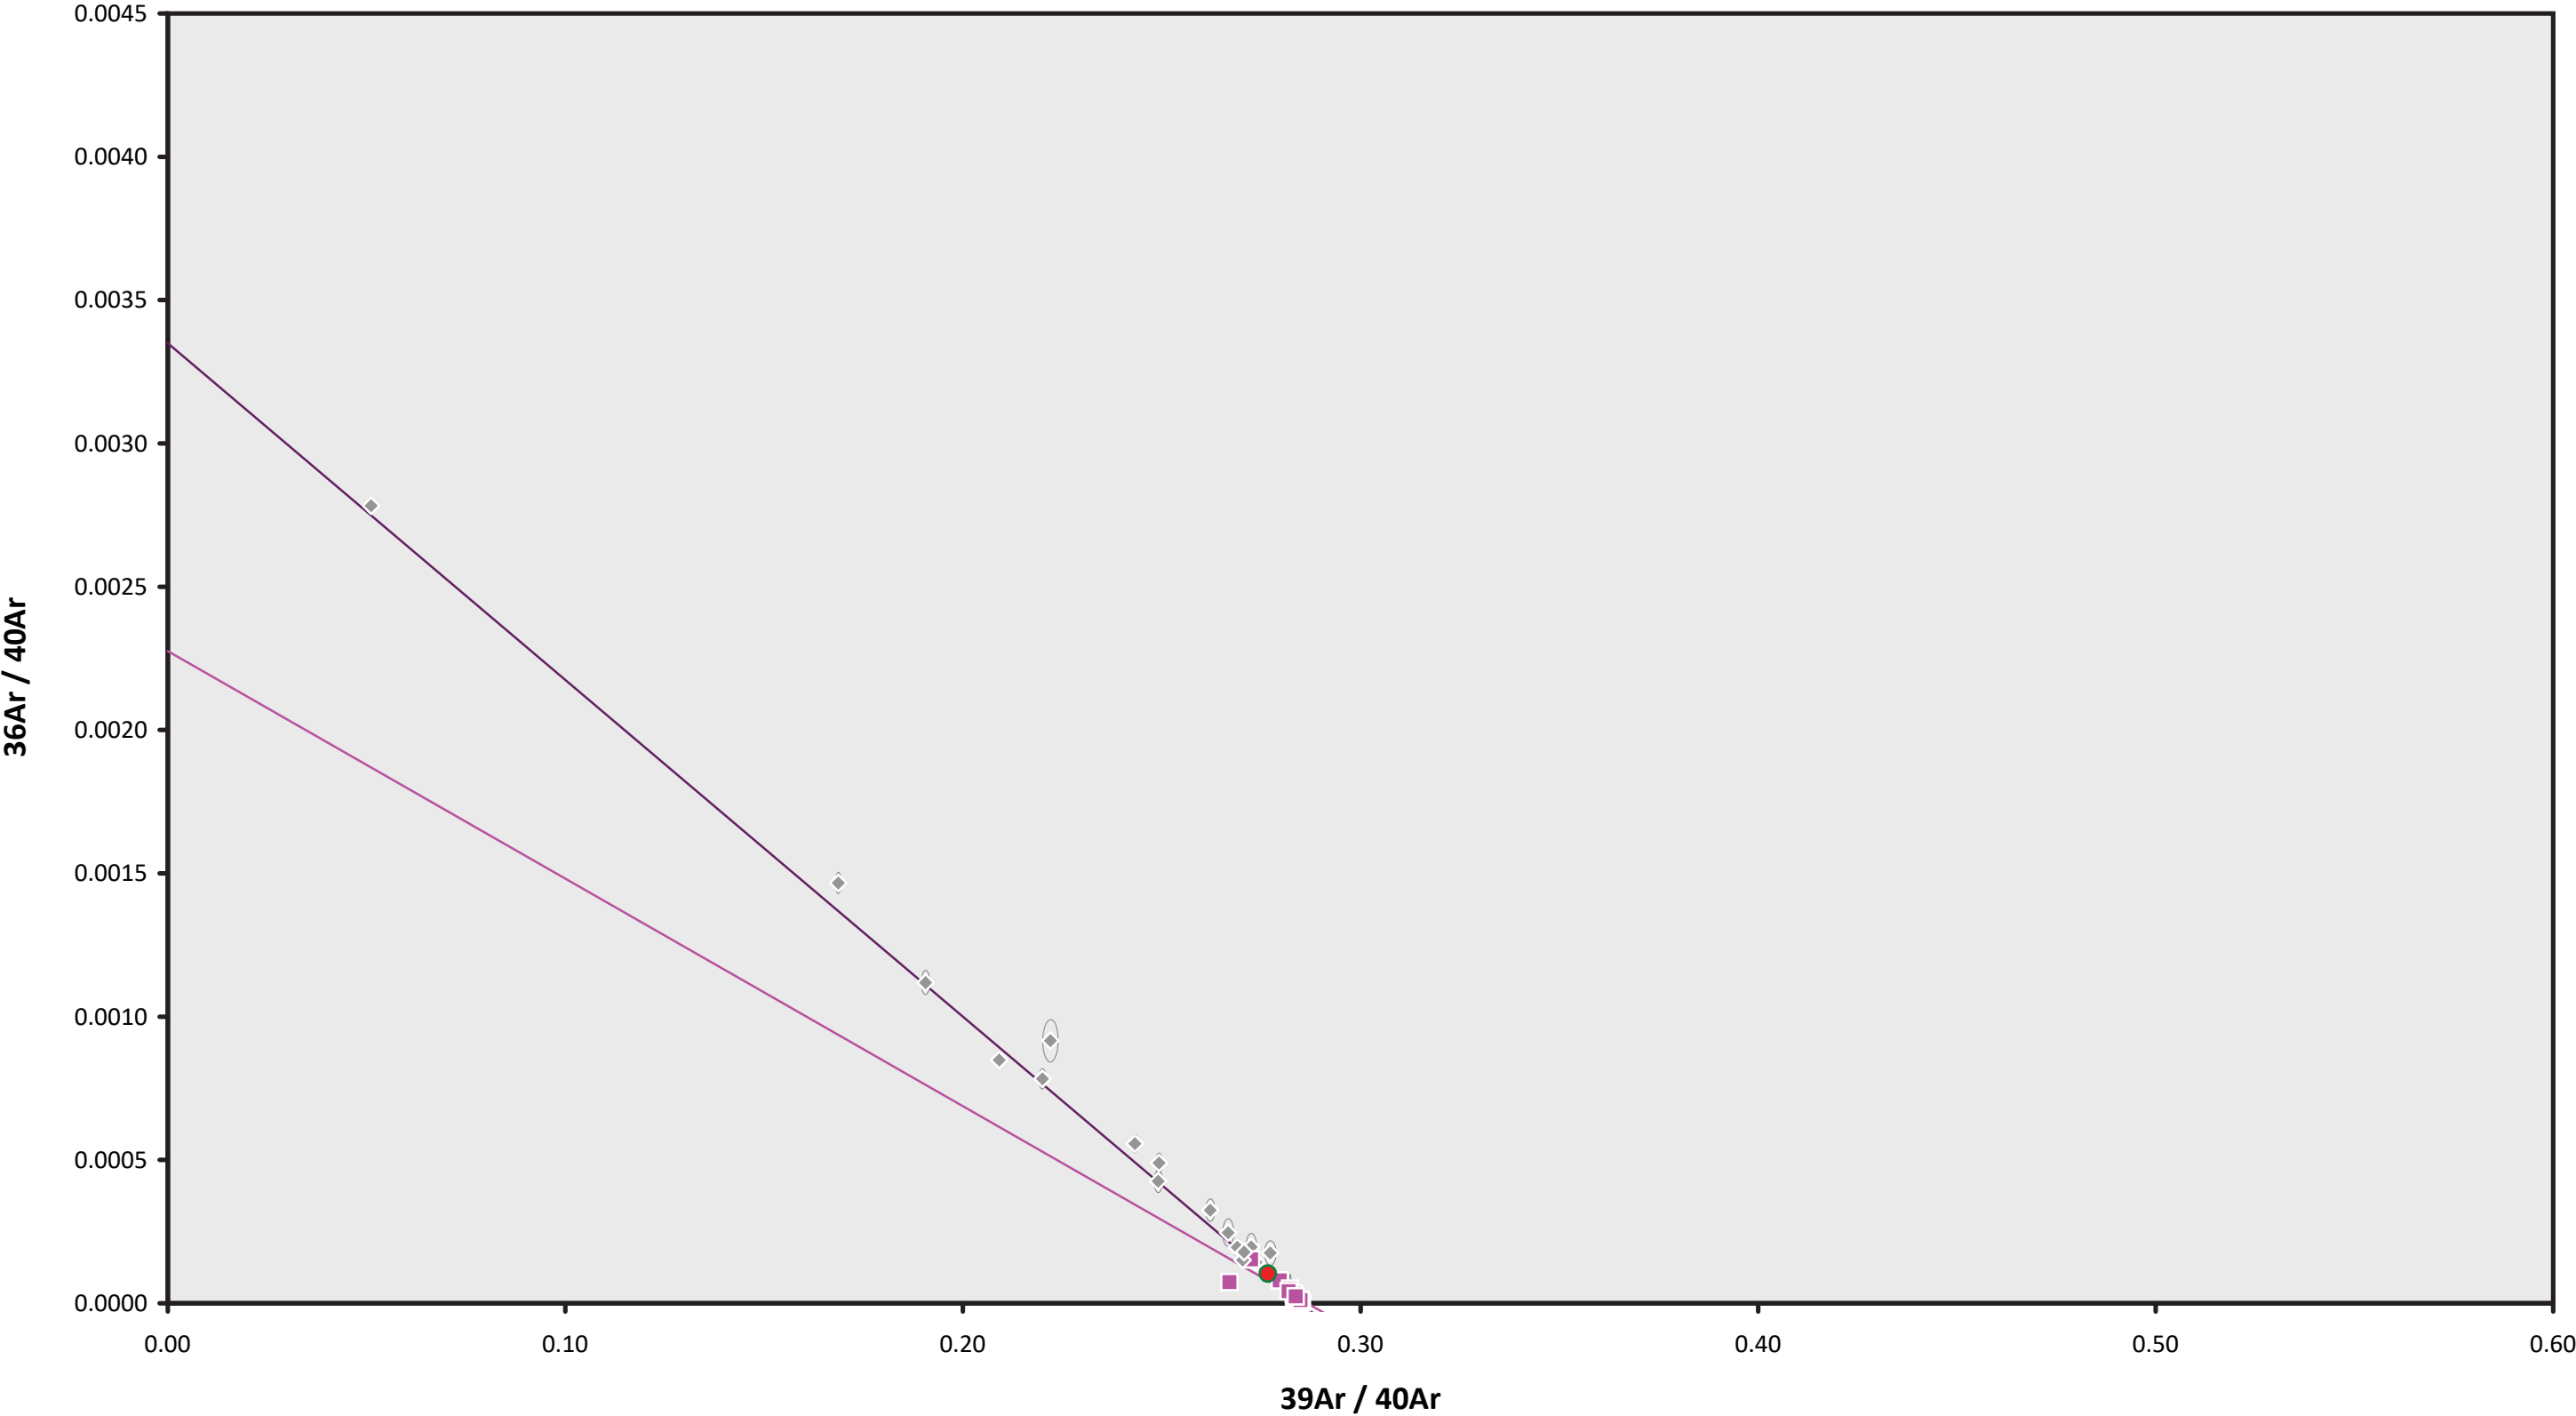

Ar-Ages in Ma

WEIGHTED PLATEAU

10.57 ± 0.06

TOTAL FUSION

10.55 ± 0.03

NORMAL ISOCHRON

10.55 ± 0.04

INVERSE ISOCHRON

10.51 ± 0.08

MSWD (PROBABILITY)

> 100 (0%)

SPREADING FACTOR

6.3%

CALCULATED 40AR/36AR INTERCEPT

439.6 ± 149.0

Sample Info

Sanidine

Circle Bar

Dan Miggins

IRR = 21-OSU-04 (4X12-21)

J = 0.00165067 ± 0.00000187

| Relative Abundances |        |   | 36Ar<br>[fA] | %1σ   | 37Ar<br>[fA] | %1σ    | 38Ar<br>[fA] | %1σ   | 39Ar<br>[fA] | %1σ   | 40Ar<br>[fA] | %1σ   | 40(r)/39(k) ± 2σ  | Age ± 2σ<br>(Ma) | 40Ar(r)<br>(%) | 39Ar(k)<br>(%) | K/Ca ± 2σ   |
|---------------------|--------|---|--------------|-------|--------------|--------|--------------|-------|--------------|-------|--------------|-------|-------------------|------------------|----------------|----------------|-------------|
| 21F16639            | 24.0 % | ✓ | 0.0226764    | 1.929 | 0.499143     | 9.131  | 0.589405     | 1.624 | 47.6858      | 0.045 | 173.8788     | 0.016 | 3.50463 ± 0.00645 | 10.52 ± 0.02     | 96.11          | 3.26           | 41.1 ± 7.5  |
| 21F16640            | 24.0 % | ✓ | 0.0205423    | 1.990 | 0.554332     | 8.697  | 1.153635     | 0.890 | 94.6392      | 0.039 | 338.4117     | 0.009 | 3.51089 ± 0.00384 | 10.54 ± 0.01     | 98.18          | 6.47           | 73.4 ± 12.8 |
| 21F16642            | 24.0 % | ✓ | 0.0133097    | 3.175 | 0.397532     | 11.310 | 0.700647     | 1.439 | 58.6272      | 0.042 | 209.2574     | 0.014 | 3.50147 ± 0.00532 | 10.51 ± 0.02     | 98.10          | 4.01           | 63.4 ± 14.3 |
| 21F16643            | 24.0 % | ✓ | 0.0159823    | 2.528 | 0.220028     | 19.669 | 0.401577     | 2.441 | 33.1517      | 0.051 | 121.5825     | 0.020 | 3.52347 ± 0.00826 | 10.58 ± 0.02     | 96.07          | 2.27           | 64.8 ± 25.5 |
| 21F16645            | 24.0 % | ✓ | 0.0071283    | 5.505 | 0.288866     | 15.790 | 0.432205     | 2.281 | 36.9455      | 0.049 | 131.6708     | 0.020 | 3.50636 ± 0.00735 | 10.53 ± 0.02     | 98.38          | 2.53           | 55.0 ± 17.4 |
| 21F16646            | 24.0 % |   | 0.0269826    | 1.612 | 0.150550     | 30.019 | 0.167852     | 5.846 | 14.2592      | 0.083 | 57.7262      | 0.042 | 3.48365 ± 0.01946 | 10.46 ± 0.06     | 86.05          | 0.98           | 40.7 ± 24.5 |
| 21F16648            | 24.0 % |   | 0.0550249    | 0.927 | 0.467649     | 9.821  | 0.456826     | 1.882 | 37.3886      | 0.048 | 146.2838     | 0.019 | 3.47356 ± 0.00899 | 10.43 ± 0.03     | 88.78          | 2.56           | 34.4 ± 6.8  |
| 21F16649            | 24.0 % | ✓ | 0.0295439    | 1.579 | 0.658343     | 7.010  | 0.507428     | 1.709 | 41.5717      | 0.047 | 154.8894     | 0.018 | 3.51437 ± 0.00759 | 10.55 ± 0.02     | 94.32          | 2.84           | 27.2 ± 3.8  |
| 21F16651            | 24.0 % | ✓ | 0.0056435    | 6.662 | 0.194339     | 22.695 | 0.398201     | 2.220 | 32.6299      | 0.051 | 116.3382     | 0.023 | 3.51365 ± 0.00794 | 10.55 ± 0.02     | 98.55          | 2.23           | 72.2 ± 32.8 |
| 21F16652            | 24.0 % | ✓ | 0.0056891    | 6.614 | 0.339805     | 12.835 | 0.304713     | 3.175 | 25.8413      | 0.057 | 92.3240      | 0.031 | 3.50748 ± 0.00982 | 10.53 ± 0.03     | 98.17          | 1.77           | 32.7 ± 8.4  |
| 21F16654            | 24.0 % | ✓ | 0.0138984    | 2.946 | 0.287114     | 14.950 | 0.430122     | 2.178 | 35.6845      | 0.049 | 129.5347     | 0.021 | 3.51378 ± 0.00782 | 10.55 ± 0.02     | 96.80          | 2.44           | 53.4 ± 16.0 |
| 21F16655            | 24.0 % | ✓ | 0.0304792    | 1.386 | 0.876362     | 4.851  | 1.381405     | 0.702 | 113.8959     | 0.039 | 409.1309     | 0.008 | 3.51228 ± 0.00358 | 10.55 ± 0.01     | 97.78          | 7.79           | 55.9 ± 5.4  |
| 21F16657            | 24.0 % | ✓ | 0.0138396    | 2.822 | 0.347459     | 12.478 | 0.352828     | 2.625 | 30.0620      | 0.056 | 109.8371     | 0.023 | 3.51659 ± 0.00886 | 10.56 ± 0.03     | 96.25          | 2.06           | 37.2 ± 9.3  |
| 21F16658            | 24.0 % | ✓ | 0.0877465    | 0.629 | 0.931733     | 4.582  | 0.880063     | 1.095 | 73.3397      | 0.041 | 282.9221     | 0.012 | 3.50093 ± 0.00547 | 10.51 ± 0.02     | 90.75          | 5.02           | 33.8 ± 3.1  |
| 21F16660            | 24.0 % | ✓ | 0.0081418    | 4.509 | 0.404674     | 10.759 | 0.572833     | 1.668 | 47.5553      | 0.044 | 169.6254     | 0.017 | 3.51589 ± 0.00569 | 10.56 ± 0.02     | 98.57          | 3.25           | 50.5 ± 10.9 |
| 21F16661            | 24.0 % | ✓ | 0.0169910    | 2.267 | 0.449033     | 9.084  | 0.468035     | 2.124 | 39.0937      | 0.046 | 142.2256     | 0.020 | 3.50866 ± 0.00687 | 10.54 ± 0.02     | 96.44          | 2.67           | 37.4 ± 6.8  |
| 21F16663            | 24.0 % | ✓ | 0.0131452    | 3.225 | 0.349588     | 13.451 | 0.613392     | 1.522 | 51.7143      | 0.044 | 185.9814     | 0.015 | 3.52039 ± 0.00591 | 10.57 ± 0.02     | 97.89          | 3.54           | 63.6 ± 17.1 |
| 21F16664            | 24.0 % | ✓ | 0.0128962    | 3.209 | 0.338729     | 13.005 | 0.450462     | 2.102 | 37.5844      | 0.046 | 136.3506     | 0.020 | 3.52555 ± 0.00748 | 10.59 ± 0.02     | 97.18          | 2.57           | 47.7 ± 12.4 |
| 21F16666            | 24.0 % | ✓ | 0.0168101    | 2.399 | 0.511772     | 8.542  | 0.686151     | 1.423 | 58.1356      | 0.044 | 209.1354     | 0.013 | 3.51117 ± 0.00525 | 10.54 ± 0.02     | 97.60          | 3.98           | 48.8 ± 8.3  |
| 21F16667            | 24.0 % |   | 0.0150278    | 2.507 | 0.256870     | 17.686 | 0.190409     | 5.079 | 15.8048      | 0.076 | 60.7421      | 0.038 | 3.56014 ± 0.01553 | 10.69 ± 0.05     | 92.63          | 1.08           | 26.5 ± 9.4  |
| 21F16669            | 24.0 % | ✓ | 0.0202939    | 1.974 | 0.526684     | 8.459  | 0.526684     | 0.905 | 85.8135      | 0.041 | 307.6310     | 0.010 | 3.51417 ± 0.00406 | 10.55 ± 0.01     | 98.03          | 5.87           | 70.1 ± 11.9 |
| 21F16670            | 24.0 % | ✓ | 0.0165551    | 2.407 | 0.354793     | 12.285 | 0.603739     | 1.517 | 50.8737      | 0.044 | 183.2131     | 0.015 | 3.50415 ± 0.00570 | 10.52 ± 0.02     | 97.30          | 3.48           | 61.7 ± 15.1 |
| 21F16672            | 24.0 % | ✓ | 0.0154030    | 2.612 | 0.399915     | 11.298 | 0.503962     | 1.868 | 41.2249      | 0.047 | 149.3710     | 0.017 | 3.51197 ± 0.00681 | 10.55 ± 0.02     | 96.93          | 2.82           | 44.3 ± 10.0 |
| 21F16673            | 24.0 % |   | 0.0235980    | 1.799 | 0.272960     | 15.749 | 0.319037     | 2.978 | 62.2211      | 0.055 | 99.8486      | 0.026 | 3.53951 ± 0.01063 | 10.63 ± 0.03     | 92.95          | 1.79           | 41.3 ± 13.0 |
| 21F16675            | 24.0 % | ✓ | 0.0136063    | 2.918 | 0.387742     | 10.962 | 0.813829     | 1.075 | 69.7485      | 0.040 | 249.3585     | 0.012 | 3.51672 ± 0.00452 | 10.56 ± 0.01     | 98.37          | 4.77           | 77.3 ± 17.0 |
| 21F16676            | 24.0 % | ✓ | 0.0172511    | 2.446 | 0.167588     | 24.673 | 0.265981     | 3.541 | 23.1655      | 0.060 | 86.4971      | 0.031 | 3.51154 ± 0.01189 | 10.54 ± 0.04     | 94.04          | 1.58           | 59.4 ± 29.3 |
| 21F16678            | 24.0 % | ✓ | 0.0359495    | 1.309 | 0.311068     | 14.191 | 0.315810     | 2.890 | 25.5097      | 0.057 | 100.2681     | 0.025 | 3.51024 ± 0.01193 | 10.54 ± 0.04     | 89.31          | 1.74           | 35.3 ± 10.0 |
| 21F16679            | 24.0 % | ✓ | 0.0056468    | 6.646 | 0.386367     | 10.966 | 0.501159     | 1.941 | 42.1224      | 0.046 | 149.8961     | 0.018 | 3.51872 ± 0.00636 | 10.57 ± 0.02     | 98.88          | 2.88           | 46.9 ± 10.3 |
| 21F16681            | 24.0 % | ✓ | 0.0486469    | 0.991 | 0.478723     | 8.638  | 0.497084     | 1.897 | 41.0103      | 0.045 | 158.4820     | 0.017 | 3.51065 ± 0.00786 | 10.54 ± 0.02     | 90.84          | 2.80           | 36.8 ± 6.4  |
| 21F16682            | 24.0 % |   | 0.0830171    | 0.702 | 2.284730     | 1.883  | 1.583796     | 0.608 | 131.0746     | 0.038 | 948.4734     | 0.005 | 7.04792 ± 0.00608 | 21.10 ± 0.02     | 97.40          | 8.96           | 24.7 ± 0.9  |
| Σ                   |        |   | 0.7114664    | 0.329 | 14.094491    | 1.711  | 17.573522    | 0.296 | 1462.3742    | 0.009 | 5810.8869    | 0.003 |                   |                  |                |                |             |

| Information on Analysis and Constants Used in Calculations |  |
|------------------------------------------------------------|--|
| Project = <b>SWENTON (20-01)</b>                           |  |
| Sample = <b>VS19-089</b>                                   |  |
| Material = <b>Sanidine</b>                                 |  |
| Location = <b>Circle Bar</b>                               |  |
| Region = <b>Eastern Oregon</b>                             |  |
| Analyst = <b>Dan Miggins</b>                               |  |
| Irradiation = <b>21-OSU-04 (4X16-21)</b>                   |  |
| Position = <b>X: 0   Y: 0   Z/H: 17.07699 mm</b>           |  |
| FCT-NM Age = <b>28.201 ± 0.023 Ma</b>                      |  |
| FCT-NM Reference = <b>Kuiper et al (2008)</b>              |  |
| FCT-NM 40Ar/39Ar Ratio = <b>9.43768 ± 0.01057</b>          |  |
| FCT-NM J-value = <b>0.00164505 ± 0.00000184</b>            |  |
| Air Shot 40Ar/36Ar = <b>301.4920 ± 0.3166</b>              |  |
| Air Shot MDF = <b>0.99756562 ± 0.00036635 (LIN)</b>        |  |
| Experiment Type = <b>Total Fusion</b>                      |  |
| Extraction Method = <b>Single Crystal Laser Heating</b>    |  |
| Heating = <b>62 sec</b>                                    |  |
| Isolation = <b>1.50 min</b>                                |  |
| Instrument = <b>ARGUS-VI-F</b>                             |  |
| Preferred Age = <b>Ideogram Age</b>                        |  |
| Age Classification = <b>Eruption Age</b>                   |  |
| IGSN = <b>Undefined</b>                                    |  |
| Rock Class = <b>Undefined</b>                              |  |
| Lithology = <b>Undefined</b>                               |  |
| Lat-Lon = <b>Undefined - Undefined</b>                     |  |

Age Equations = **Min et al. (2000)**  
Negative Intensities = **Allowed**  
Collector Calibrations = **36Ar**  
Decay 40K = **5.463 ± 0.107 E-10 1/a**  
Decay 39Ar = **2.940 ± 0.016 E-07 1/h**  
Decay 37Ar = **8.230 ± 0.012 E-04 1/h**  
Decay 36Cl = **2.257 ± 0.015 E-06 1/a**  
Decay 40K(EC,β<sup>+</sup>) = **0.580 ± 0.014 E-10 1/a**  
Decay 40K(β<sup>-</sup>) = **4.884 ± 0.099 E-10 1/a**  
Atmospheric 40/36(a) = **298.56 ± 0.31**  
Atmospheric 38/36(a) = **0.1885 ± 0.0003**  
Production 39/37(ca) = **0.0006425 ± 0.0000059**  
Production 38/37(ca) = **0.0001800 ± 0.0000173**  
Production 36/37(ca) = **0.0002703 ± 0.0000005**  
Production 40/39(k) = **0.000607 ± 0.000059**  
Production 38/39(k) = **0.012077 ± 0.000011**  
Production 36/38(cl) = **262.80 ± 1.71**  
Scaling Ratio K/Ca = **0.430**  
Abundance Ratio 40K/K = **1.1700 ± 0.0100 E-04**  
Atomic Weight K = **39.0983 ± 0.0001 g**

| Results                         | 40(a)/36(a) ± 2σ      | 40(r)/39(k) ± 2σ           | Age ± 2σ<br>(Ma)     | MSWD         | 39Ar(k)<br>(%,n)     | K/Ca ± 2σ  |
|---------------------------------|-----------------------|----------------------------|----------------------|--------------|----------------------|------------|
| Age Plateau<br>Error Mean       |                       | 3.51193 ± 0.00235 ± 0.07%  | 10.54 ± 0.02 ± 0.23% | 3.84<br>0%   | 84.63<br>25          | 51.6 ± 5.7 |
|                                 |                       | Full External Error ± 0.55 |                      | 1.58         | 2σ Confidence Limit  |            |
|                                 |                       | Analytical Error ± 0.01    |                      | 1.9605       | Error Magnification  |            |
| Total Fusion Age                |                       | 3.82854 ± 0.00120 ± 0.03%  | 11.49 ± 0.03 ± 0.23% |              | 30                   | 44.6 ± 1.5 |
|                                 |                       | Full External Error ± 0.60 |                      |              |                      |            |
|                                 |                       | Analytical Error ± 0.00    |                      |              |                      |            |
| Normal Isochron<br>Error Chron  | 290.11 ± 8.13 ± 2.80% | 3.51493 ± 0.00373 ± 0.11%  | 10.55 ± 0.03 ± 0.25% | 3.81<br>0%   | 84.63<br>25          |            |
|                                 |                       | Full External Error ± 0.55 |                      | 1.59         | 2σ Confidence Limit  |            |
|                                 |                       | Analytical Error ± 0.01    |                      | 1.9522       | Error Magnification  |            |
|                                 |                       |                            |                      | 1            | Number of Iterations |            |
|                                 |                       |                            |                      | 0.0000011803 | Convergence          |            |
| Inverse Isochron<br>Error Chron | 292.48 ± 8.01 ± 2.74% | 3.51413 ± 0.00368 ± 0.10%  | 10.55 ± 0.03 ± 0.25% | 3.67<br>0%   | 84.63<br>25          |            |
|                                 |                       | Full External Error ± 0.55 |                      | 1.59         | 2σ Confidence Limit  |            |
|                                 |                       | Analytical Error ± 0.01    |                      | 1.9152       | Error Magnification  |            |
|                                 |                       |                            |                      | 3            | Number of Iterations |            |
|                                 |                       |                            |                      | 0.0000110836 | Convergence          |            |
|                                 |                       |                            |                      | 9%           | Spreading Factor     |            |



| Incremental Heating |        |   | 36Ar(a)<br>[fA] | 37Ar(ca)<br>[fA] | 38Ar(cl)<br>[fA] | 39Ar(k)<br>[fA] | 40Ar(r)<br>[fA] | Age ± 2σ<br>(Ma) | 40Ar(r)<br>(%) | 39Ar(k)<br>(%) | K/Ca ± 2σ   |
|---------------------|--------|---|-----------------|------------------|------------------|-----------------|-----------------|------------------|----------------|----------------|-------------|
| 21F16639            | 24.0 % | ✓ | 0.0225402       | 0.499143         | 0.0091683        | 47.6855         | 167.1203        | 10.52 ± 0.02     | 96.11          | 3.26           | 41.1 ± 7.5  |
| 21F16640            | 24.0 % | ✓ | 0.0203915       | 0.554332         | 0.0067390        | 94.6388         | 332.2662        | 10.54 ± 0.01     | 98.18          | 6.47           | 73.4 ± 12.8 |
| 21F16642            | 24.0 % | ✓ | 0.0132023       | 0.397532         | 0.0000000        | 58.6269         | 205.2802        | 10.51 ± 0.02     | 98.10          | 4.01           | 63.4 ± 14.3 |
| 21F16643            | 24.0 % | ✓ | 0.0159229       | 0.220028         | 0.0000000        | 33.1515         | 116.8084        | 10.58 ± 0.02     | 96.07          | 2.27           | 64.8 ± 25.5 |
| 21F16645            | 24.0 % | ✓ | 0.0070503       | 0.288866         | 0.0000000        | 36.9453         | 129.5434        | 10.53 ± 0.02     | 98.38          | 2.53           | 55.0 ± 17.4 |
| 21F16646            | 24.0 % |   | 0.0269419       | 0.150550         | 0.0000000        | 14.2591         | 49.6738         | 10.46 ± 0.06     | 86.05          | 0.98           | 40.7 ± 24.5 |
| 21F16648            | 24.0 % |   | 0.0548985       | 0.467649         | 0.0000000        | 37.3883         | 129.8706        | 10.43 ± 0.03     | 88.78          | 2.56           | 34.4 ± 6.8  |
| 21F16649            | 24.0 % | ✓ | 0.0293659       | 0.658343         | 0.0000000        | 41.5713         | 146.0966        | 10.55 ± 0.02     | 94.32          | 2.84           | 27.2 ± 3.8  |
| 21F16651            | 24.0 % | ✓ | 0.0055905       | 0.194339         | 0.0030434        | 32.6297         | 114.6493        | 10.55 ± 0.02     | 98.55          | 2.23           | 72.2 ± 32.8 |
| 21F16652            | 24.0 % | ✓ | 0.0055973       | 0.339805         | 0.0000000        | 25.8411         | 90.6372         | 10.53 ± 0.03     | 98.17          | 1.77           | 32.7 ± 8.4  |
| 21F16654            | 24.0 % | ✓ | 0.0138208       | 0.287114         | 0.0000000        | 35.6843         | 125.3867        | 10.55 ± 0.02     | 96.80          | 2.44           | 53.4 ± 16.0 |
| 21F16655            | 24.0 % | ✓ | 0.0302423       | 0.876362         | 0.0000333        | 113.8953        | 400.0326        | 10.55 ± 0.01     | 97.78          | 7.79           | 55.9 ± 5.4  |
| 21F16657            | 24.0 % | ✓ | 0.0137457       | 0.347459         | 0.0000000        | 30.0618         | 105.7149        | 10.56 ± 0.03     | 96.25          | 2.06           | 37.2 ± 9.3  |
| 21F16658            | 24.0 % | ✓ | 0.0874947       | 0.931733         | 0.0000000        | 73.3391         | 256.7551        | 10.51 ± 0.02     | 90.75          | 5.02           | 33.8 ± 3.1  |
| 21F16660            | 24.0 % | ✓ | 0.0080324       | 0.404674         | 0.0000000        | 47.5551         | 167.1983        | 10.56 ± 0.02     | 98.57          | 3.25           | 50.5 ± 10.9 |
| 21F16661            | 24.0 % | ✓ | 0.0168697       | 0.449033         | 0.0000000        | 39.0934         | 137.1653        | 10.54 ± 0.02     | 96.44          | 2.67           | 37.4 ± 6.8  |
| 21F16663            | 24.0 % | ✓ | 0.0130507       | 0.349588         | 0.0000000        | 51.7140         | 182.0536        | 10.57 ± 0.02     | 97.89          | 3.54           | 63.6 ± 17.1 |
| 21F16664            | 24.0 % | ✓ | 0.0128046       | 0.338729         | 0.0000000        | 37.5841         | 132.5048        | 10.59 ± 0.02     | 97.18          | 2.57           | 47.7 ± 12.4 |
| 21F16666            | 24.0 % | ✓ | 0.0166718       | 0.511772         | 0.0000000        | 58.1353         | 204.1226        | 10.54 ± 0.02     | 97.60          | 3.98           | 48.8 ± 8.3  |
| 21F16667            | 24.0 % |   | 0.0149584       | 0.256870         | 0.0000000        | 15.8046         | 56.2666         | 10.69 ± 0.05     | 92.63          | 1.08           | 26.5 ± 9.4  |
| 21F16669            | 24.0 % | ✓ | 0.0201516       | 0.526684         | 0.0000000        | 85.8132         | 301.5624        | 10.55 ± 0.01     | 98.03          | 5.87           | 70.1 ± 11.9 |
| 21F16670            | 24.0 % | ✓ | 0.0164592       | 0.354793         | 0.0000000        | 50.8735         | 178.2681        | 10.52 ± 0.02     | 97.30          | 3.48           | 61.7 ± 15.1 |
| 21F16672            | 24.0 % | ✓ | 0.0152945       | 0.399915         | 0.0031376        | 41.2246         | 144.7796        | 10.55 ± 0.02     | 96.93          | 2.82           | 44.3 ± 10.0 |
| 21F16673            | 24.0 % |   | 0.0235242       | 0.272960         | 0.0000000        | 26.2210         | 92.8093         | 10.63 ± 0.03     | 92.95          | 1.79           | 41.3 ± 13.0 |
| 21F16675            | 24.0 % | ✓ | 0.0135015       | 0.387742         | 0.0000000        | 69.7483         | 245.2852        | 10.56 ± 0.01     | 98.37          | 4.77           | 77.3 ± 17.0 |
| 21F16676            | 24.0 % | ✓ | 0.0172058       | 0.167588         | 0.0000000        | 23.1654         | 81.3460         | 10.54 ± 0.04     | 94.04          | 1.58           | 59.4 ± 29.3 |
| 21F16678            | 24.0 % | ✓ | 0.0358653       | 0.311068         | 0.0009145        | 25.5095         | 89.5446         | 10.54 ± 0.04     | 89.31          | 1.74           | 35.3 ± 10.0 |
| 21F16679            | 24.0 % | ✓ | 0.0055423       | 0.386367         | 0.0000000        | 42.1221         | 148.2158        | 10.57 ± 0.02     | 98.88          | 2.88           | 46.9 ± 10.3 |
| 21F16681            | 24.0 % | ✓ | 0.0485175       | 0.478723         | 0.0000000        | 41.0100         | 143.9718        | 10.54 ± 0.02     | 90.84          | 2.80           | 36.8 ± 6.4  |
| 21F16682            | 24.0 % |   | 0.0823995       | 2.284730         | 0.0000000        | 131.0731        | 923.7926        | 21.10 ± 0.02     | 97.40          | 8.96           | 24.7 ± 0.9  |
| Σ                   |        |   | 0.7076536       | 14.094491        | 0.0230361        | 1462.3651       | 5598.7222       |                  |                |                |             |

| Information on Analysis                                                                                                                                                                                                                                                                                             | Results                 | 40(r)/39(k) ± 2σ           | Age ± 2σ<br>(Ma)           | MSWD                        | 39Ar(k)<br>(%,n) | K/Ca ± 2σ           |
|---------------------------------------------------------------------------------------------------------------------------------------------------------------------------------------------------------------------------------------------------------------------------------------------------------------------|-------------------------|----------------------------|----------------------------|-----------------------------|------------------|---------------------|
| Project = <b>SWENTON (20-01)</b><br>Sample = <b>VS19-089</b><br>Material = <b>Sanidine</b><br>Location = <b>Circle Bar</b><br>Region = <b>Eastern Oregon</b><br>Analyst = <b>Dan Miggins</b><br>Irradiation = <b>21-OSU-04 (4X16-21)</b><br>J = <b>0.00164505 ± 0.00000184</b><br>FCT-NM = <b>28.201 ± 0.023 Ma</b> | <b>Age Plateau</b>      |                            | 3.51193 ± 0.00235          | <b>10.54 ± 0.02</b>         | 3.84             | 84.63               |
|                                                                                                                                                                                                                                                                                                                     | <b>Error Mean</b>       |                            | ± 0.07%                    | <b>± 0.23%</b>              | 0%               | 25                  |
|                                                                                                                                                                                                                                                                                                                     |                         |                            | Full External Error ± 0.55 |                             | 1.58             | 2σ Confidence Limit |
|                                                                                                                                                                                                                                                                                                                     |                         |                            | Analytical Error ± 0.01    |                             | 1.9605           | Error Magnification |
|                                                                                                                                                                                                                                                                                                                     | <b>Total Fusion Age</b> |                            | 3.82854 ± 0.00120 ± 0.03%  | <b>11.49 ± 0.03 ± 0.23%</b> |                  | 30                  |
|                                                                                                                                                                                                                                                                                                                     |                         | Full External Error ± 0.60 |                            |                             |                  |                     |
|                                                                                                                                                                                                                                                                                                                     |                         | Analytical Error ± 0.00    |                            |                             |                  |                     |



| Normal Isochron |        |   | 39(k)/36(a) ± 2σ  | 40(a+r)/36(a) ± 2σ | r.i.   |
|-----------------|--------|---|-------------------|--------------------|--------|
| 21F16639        | 24.0 % | ✓ | 2115.57 ± 82.18   | 7712.87 ± 299.52   | 0.9997 |
| 21F16640        | 24.0 % | ✓ | 4641.08 ± 186.18  | 16592.88 ± 665.53  | 0.9998 |
| 21F16642        | 24.0 % | ✓ | 4440.67 ± 284.41  | 15847.42 ± 1014.89 | 0.9999 |
| 21F16643        | 24.0 % | ✓ | 2082.01 ± 105.74  | 7634.45 ± 387.66   | 0.9998 |
| 21F16645        | 24.0 % | ✓ | 5240.27 ± 583.68  | 18672.82 ± 2079.77 | 1.0000 |
| 21F16646        | 24.0 % |   | 529.25 ± 17.12    | 2142.30 ± 69.23    | 0.9983 |
| 21F16648        | 24.0 % |   | 681.04 ± 12.68    | 2664.21 ± 49.54    | 0.9984 |
| 21F16649        | 24.0 % | ✓ | 1415.63 ± 45.01   | 5273.60 ± 167.62   | 0.9995 |
| 21F16651        | 24.0 % | ✓ | 5836.61 ± 785.48  | 20806.34 ± 2800.00 | 1.0000 |
| 21F16652        | 24.0 % | ✓ | 4616.75 ± 621.05  | 16491.73 ± 2218.43 | 1.0000 |
| 21F16654        | 24.0 % | ✓ | 2581.93 ± 153.06  | 9370.87 ± 555.46   | 0.9998 |
| 21F16655        | 24.0 % | ✓ | 3766.09 ± 105.31  | 13526.14 ± 378.08  | 0.9996 |
| 21F16657        | 24.0 % | ✓ | 2187.00 ± 124.35  | 7989.34 ± 454.18   | 0.9998 |
| 21F16658        | 24.0 % | ✓ | 838.21 ± 10.60    | 3233.08 ± 40.79    | 0.9977 |
| 21F16660        | 24.0 % | ✓ | 5920.37 ± 541.44  | 21113.93 ± 1930.87 | 0.9999 |
| 21F16661        | 24.0 % | ✓ | 2317.38 ± 105.87  | 8429.44 ± 385.04   | 0.9998 |
| 21F16663        | 24.0 % | ✓ | 3962.55 ± 257.60  | 14248.27 ± 926.19  | 0.9999 |
| 21F16664        | 24.0 % | ✓ | 2935.21 ± 189.82  | 10646.78 ± 688.46  | 0.9999 |
| 21F16666        | 24.0 % | ✓ | 3487.04 ± 168.82  | 12542.14 ± 607.13  | 0.9998 |
| 21F16667        | 24.0 % |   | 1056.57 ± 53.27   | 4060.10 ± 204.61   | 0.9994 |
| 21F16669        | 24.0 % | ✓ | 4258.38 ± 169.42  | 15263.27 ± 607.13  | 0.9998 |
| 21F16670        | 24.0 % | ✓ | 3090.88 ± 149.75  | 11129.47 ± 539.15  | 0.9998 |
| 21F16672        | 24.0 % | ✓ | 2695.39 ± 141.91  | 9764.69 ± 514.03   | 0.9998 |
| 21F16673        | 24.0 % |   | 1114.64 ± 40.25   | 4243.83 ± 153.21   | 0.9994 |
| 21F16675        | 24.0 % | ✓ | 5165.96 ± 304.00  | 18465.80 ± 1086.54 | 0.9999 |
| 21F16676        | 24.0 % | ✓ | 1346.37 ± 66.09   | 5026.39 ± 246.67   | 0.9996 |
| 21F16678        | 24.0 % | ✓ | 711.26 ± 18.69    | 2795.26 ± 73.38    | 0.9989 |
| 21F16679        | 24.0 % | ✓ | 7600.05 ± 1029.69 | 27041.00 ± 3663.58 | 1.0000 |
| 21F16681        | 24.0 % | ✓ | 845.26 ± 16.83    | 3265.98 ± 64.96    | 0.9988 |
| 21F16682        | 24.0 % |   | 1590.70 ± 22.53   | 11509.71 ± 162.76  | 0.9985 |

| Results         | 40(a)/36(a) ± 2σ      | 40(r)/39(k) ± 2σ  | Age ± 2σ (Ma)              | MSWD            |
|-----------------|-----------------------|-------------------|----------------------------|-----------------|
| Normal Isochron | 290.11 ± 8.13         | 3.51493 ± 0.00373 | 10.55 ± 0.03               | 3.81            |
| Error Chron     | ± 2.80%               | ± 0.11%           | ± 0.25%                    | 0%              |
|                 |                       |                   | Full External Error ± 0.55 |                 |
|                 |                       |                   | Analytical Error ± 0.01    |                 |
| Statistics      | 2σ Confidence Limit   | 1.59              | Convergence                | 0.000001180339  |
|                 | Error Magnification   | 1.9522            | Number of Iterations       | 1               |
|                 | Number of Data Points | 25                | Calculated Line            | Weighted York-2 |

| Inverse Isochron |        |   | 39(k)/40(a+r) ± 2σ    | 36(a)/40(a+r) ± 2σ      | r.i.   |
|------------------|--------|---|-----------------------|-------------------------|--------|
| 21F16639         | 24.0 % | ✓ | 0.2742913 ± 0.0002641 | 0.00012965 ± 0.00000503 | 0.0029 |
| 21F16640         | 24.0 % | ✓ | 0.2797033 ± 0.0002264 | 0.00006027 ± 0.00000242 | 0.0011 |
| 21F16642         | 24.0 % | ✓ | 0.2802140 ± 0.0002498 | 0.00006310 ± 0.00000404 | 0.0014 |
| 21F16643         | 24.0 % | ✓ | 0.2727122 ± 0.0002987 | 0.00013099 ± 0.00000665 | 0.0030 |
| 21F16645         | 24.0 % | ✓ | 0.2806362 ± 0.0002953 | 0.00005355 ± 0.00000596 | 0.0013 |
| 21F16646         | 24.0 % |   | 0.2470499 ± 0.0004611 | 0.00046679 ± 0.00001508 | 0.0116 |
| 21F16648         | 24.0 % |   | 0.2556271 ± 0.0002664 | 0.00037535 ± 0.00000698 | 0.0078 |
| 21F16649         | 24.0 % | ✓ | 0.2684370 ± 0.0002684 | 0.00018962 ± 0.00000603 | 0.0042 |
| 21F16651         | 24.0 % | ✓ | 0.2805207 ± 0.0003150 | 0.00004806 ± 0.00000647 | 0.0014 |
| 21F16652         | 24.0 % | ✓ | 0.2799434 ± 0.0003623 | 0.00006064 ± 0.00000816 | 0.0022 |
| 21F16654         | 24.0 % | ✓ | 0.2755268 ± 0.0002928 | 0.00010671 ± 0.00000633 | 0.0028 |
| 21F16655         | 24.0 % | ✓ | 0.2784306 ± 0.0002226 | 0.00007393 ± 0.00000207 | 0.0012 |
| 21F16657         | 24.0 % | ✓ | 0.2737395 ± 0.0003301 | 0.00012517 ± 0.00000712 | 0.0031 |
| 21F16658         | 24.0 % | ✓ | 0.2592610 ± 0.0002222 | 0.00030930 ± 0.00000390 | 0.0054 |
| 21F16660         | 24.0 % | ✓ | 0.2804012 ± 0.0002654 | 0.00004736 ± 0.00000433 | 0.0013 |
| 21F16661         | 24.0 % | ✓ | 0.2749146 ± 0.0002751 | 0.00011863 ± 0.00000542 | 0.0034 |
| 21F16663         | 24.0 % | ✓ | 0.2781072 ± 0.0002607 | 0.00007018 ± 0.00000456 | 0.0015 |
| 21F16664         | 24.0 % | ✓ | 0.2756897 ± 0.0002774 | 0.00009393 ± 0.00000607 | 0.0025 |
| 21F16666         | 24.0 % | ✓ | 0.2780260 ± 0.0002539 | 0.00007973 ± 0.00000386 | 0.0016 |
| 21F16667         | 24.0 % |   | 0.2602329 ± 0.0004436 | 0.00024630 ± 0.00001241 | 0.0067 |
| 21F16669         | 24.0 % | ✓ | 0.2789956 ± 0.0002339 | 0.00006552 ± 0.00000261 | 0.0012 |
| 21F16670         | 24.0 % | ✓ | 0.2777206 ± 0.0002572 | 0.00008985 ± 0.00000435 | 0.0020 |
| 21F16672         | 24.0 % | ✓ | 0.2760343 ± 0.0002754 | 0.00010241 ± 0.00000539 | 0.0023 |
| 21F16673         | 24.0 % |   | 0.2626492 ± 0.0003211 | 0.00023564 ± 0.00000851 | 0.0064 |
| 21F16675         | 24.0 % | ✓ | 0.2797582 ± 0.0002359 | 0.00005415 ± 0.00000319 | 0.0012 |
| 21F16676         | 24.0 % | ✓ | 0.2678603 ± 0.0003598 | 0.00019895 ± 0.00000976 | 0.0057 |
| 21F16678         | 24.0 % | ✓ | 0.2544526 ± 0.0003190 | 0.00035775 ± 0.00000939 | 0.0076 |
| 21F16679         | 24.0 % | ✓ | 0.2810567 ± 0.0002777 | 0.00003698 ± 0.00000501 | 0.0009 |
| 21F16681         | 24.0 % | ✓ | 0.2588080 ± 0.0002506 | 0.00030619 ± 0.00000609 | 0.0057 |
| 21F16682         | 24.0 % |   | 0.1382054 ± 0.0001070 | 0.00008688 ± 0.00000123 | 0.0009 |

| Results          | 40(a)/36(a) ± 2σ      | 40(r)/39(k) ± 2σ  | Age ± 2σ (Ma)              | MSWD            |
|------------------|-----------------------|-------------------|----------------------------|-----------------|
| Inverse Isochron | 292.48 ± 8.01         | 3.51413 ± 0.00368 | 10.55 ± 0.03               | 3.67            |
| Error Chron      | ± 2.74%               | ± 0.10%           | ± 0.25%                    | 0%              |
|                  |                       |                   | Full External Error ± 0.55 |                 |
|                  |                       |                   | Analytical Error ± 0.01    |                 |
| Statistics       | 2σ Confidence Limit   | 1.59              | Convergence                | 0.0000110836    |
|                  | Error Magnification   | 1.9152            | Number of Iterations       | 3               |
|                  | Number of Data Points | 25                | Calculated Line            | Weighted York-2 |
|                  | Spreading Factor      | 9.3%              |                            |                 |

| Degassing Patterns |        |   | 36Ar(a)<br>[fA] | %1σ  | 36Ar(c)<br>[fA] | %1σ  | 36Ar(ca)<br>[fA] | %1σ   | 36Ar(cl)<br>[fA] | %1σ    | 37Ar(ca)<br>[fA] | %1σ   | 38Ar(a)<br>[fA] | %1σ  | 38Ar(c)<br>[fA] | %1σ  | 38Ar(k)<br>[fA] | %1σ  | 38Ar(ca)<br>[fA] | %1σ   | 38Ar(cl)<br>[fA] | %1σ    | 39Ar(k)<br>[fA] | %1σ  | 39Ar(ca)<br>[fA] | %1σ   | 40Ar(r)<br>[fA] | %1σ  | 40Ar(a)<br>[fA] | %1σ  | 40Ar(c)<br>[fA] | %1σ  | 40Ar(k)<br>[fA] | %1σ  |
|--------------------|--------|---|-----------------|------|-----------------|------|------------------|-------|------------------|--------|------------------|-------|-----------------|------|-----------------|------|-----------------|------|------------------|-------|------------------|--------|-----------------|------|------------------|-------|-----------------|------|-----------------|------|-----------------|------|-----------------|------|
| 21F16639           | 24.0 % | ✓ | 0.0225402       | 1.94 | 0.0000000       | 0.00 | 0.0001349        | 9.13  | 0.0000012        | 105.60 | 0.499143         | 9.13  | 0.0042488       | 1.95 | 0.0000000       | 0.00 | 0.575898        | 0.10 | 0.0000898        | 13.27 | 0.0091683        | 105.61 | 47.6855         | 0.05 | 0.0003207        | 9.18  | 167.1203        | 0.08 | 6.72961         | 1.94 | 0.0000000       | 0.00 | 0.0289451       | 9.65 |
| 21F16640           | 24.0 % | ✓ | 0.0203915       | 2.01 | 0.0000000       | 0.00 | 0.0001498        | 8.70  | 0.0000009        | 158.06 | 0.554332         | 8.70  | 0.0038438       | 2.01 | 0.0000000       | 0.00 | 1.142953        | 0.10 | 0.0000998        | 12.98 | 0.0067390        | 158.07 | 94.6388         | 0.04 | 0.0003562        | 8.75  | 332.2662        | 0.04 | 6.08810         | 2.01 | 0.0000000       | 0.00 | 0.0574458       | 9.65 |
| 21F16642           | 24.0 % | ✓ | 0.0132023       | 3.20 | 0.0000000       | 0.00 | 0.0001075        | 11.31 | 0.0000000        | 0.00   | 0.397532         | 11.31 | 0.0024886       | 3.21 | 0.0000000       | 0.00 | 0.708037        | 0.10 | 0.0000716        | 14.85 | 0.0000000        | 0.00   | 58.6269         | 0.04 | 0.0002554        | 11.35 | 205.2802        | 0.06 | 3.94167         | 3.20 | 0.0000000       | 0.00 | 0.0355865       | 9.65 |
| 21F16643           | 24.0 % | ✓ | 0.0159229       | 2.54 | 0.0000000       | 0.00 | 0.0000595        | 19.67 | 0.0000000        | 0.00   | 0.220028         | 19.67 | 0.0030015       | 2.54 | 0.0000000       | 0.00 | 0.400371        | 0.10 | 0.0000396        | 21.90 | 0.0000000        | 0.00   | 33.1515         | 0.05 | 0.0001414        | 19.69 | 116.8084        | 0.11 | 4.75393         | 2.54 | 0.0000000       | 0.00 | 0.0201230       | 9.65 |
| 21F16645           | 24.0 % | ✓ | 0.0070503       | 5.57 | 0.0000000       | 0.00 | 0.0000781        | 15.79 | 0.0000000        | 0.00   | 0.288866         | 15.79 | 0.0013290       | 5.57 | 0.0000000       | 0.00 | 0.446188        | 0.10 | 0.0000520        | 18.49 | 0.0000000        | 0.00   | 36.9453         | 0.05 | 0.0001856        | 15.82 | 129.5434        | 0.09 | 2.10493         | 5.57 | 0.0000000       | 0.00 | 0.0224258       | 9.65 |
| 21F16646           | 24.0 % |   | 0.0269419       | 1.62 | 0.0000000       | 0.00 | 0.0000407        | 30.02 | 0.0000000        | 0.00   | 0.150550         | 30.02 | 0.0050786       | 1.62 | 0.0000000       | 0.00 | 0.172207        | 0.12 | 0.0000271        | 31.53 | 0.0000000        | 0.00   | 14.2591         | 0.08 | 0.0000967        | 30.03 | 49.6738         | 0.27 | 8.04378         | 1.62 | 0.0000000       | 0.00 | 0.0086553       | 9.65 |
| 21F16648           | 24.0 % |   | 0.0548985       | 0.93 | 0.0000000       | 0.00 | 0.0001264        | 9.82  | 0.0000000        | 0.00   | 0.467649         | 9.82  | 0.0103484       | 0.94 | 0.0000000       | 0.00 | 0.451539        | 0.10 | 0.0000842        | 13.75 | 0.0000000        | 0.00   | 37.3883         | 0.05 | 0.0003005        | 9.86  | 129.8706        | 0.12 | 16.39050        | 0.94 | 0.0000000       | 0.00 | 0.0226947       | 9.65 |
| 21F16649           | 24.0 % | ✓ | 0.0293659       | 1.59 | 0.0000000       | 0.00 | 0.0001780        | 7.01  | 0.0000000        | 0.00   | 0.658343         | 7.01  | 0.0055355       | 1.60 | 0.0000000       | 0.00 | 0.502056        | 0.10 | 0.0001185        | 11.91 | 0.0000000        | 0.00   | 41.5713         | 0.05 | 0.0004230        | 7.07  | 146.0966        | 0.10 | 8.76749         | 1.59 | 0.0000000       | 0.00 | 0.0252338       | 9.65 |
| 21F16651           | 24.0 % | ✓ | 0.0055905       | 6.73 | 0.0000000       | 0.00 | 0.0000525        | 22.70 | 0.0000004        | 292.32 | 0.194339         | 22.70 | 0.0010538       | 6.73 | 0.0000000       | 0.00 | 0.394069        | 0.10 | 0.0000350        | 24.65 | 0.0030434        | 292.32 | 32.6297         | 0.05 | 0.0001249        | 22.71 | 114.6493        | 0.10 | 1.66911         | 6.73 | 0.0000000       | 0.00 | 0.0198062       | 9.65 |
| 21F16652           | 24.0 % | ✓ | 0.0055973       | 6.73 | 0.0000000       | 0.00 | 0.0000918        | 12.84 | 0.0000000        | 0.00   | 0.339805         | 12.83 | 0.0010551       | 6.73 | 0.0000000       | 0.00 | 0.312083        | 0.11 | 0.0000612        | 16.05 | 0.0000000        | 0.00   | 25.8411         | 0.06 | 0.0002183        | 12.87 | 90.6372         | 0.13 | 1.67112         | 6.73 | 0.0000000       | 0.00 | 0.0156856       | 9.65 |
| 21F16654           | 24.0 % | ✓ | 0.0138208       | 2.96 | 0.0000000       | 0.00 | 0.0000776        | 14.95 | 0.0000000        | 0.00   | 0.287114         | 14.95 | 0.0026052       | 2.97 | 0.0000000       | 0.00 | 0.430960        | 0.10 | 0.0000517        | 17.78 | 0.0000000        | 0.00   | 35.6843         | 0.05 | 0.0001845        | 14.98 | 125.3867        | 0.10 | 4.12634         | 2.97 | 0.0000000       | 0.00 | 0.0216604       | 9.65 |
| 21F16655           | 24.0 % | ✓ | 0.0302423       | 1.40 | 0.0000000       | 0.00 | 0.0002369        | 4.85  | 0.0000000        | #####  | 0.876362         | 4.85  | 0.0057007       | 1.41 | 0.0000000       | 0.00 | 1.375514        | 0.10 | 0.0001577        | 10.78 | 0.0000333        | #####  | 113.8953        | 0.04 | 0.0005631        | 4.94  | 400.0326        | 0.03 | 9.02914         | 1.40 | 0.0000000       | 0.00 | 0.0691344       | 9.65 |
| 21F16657           | 24.0 % | ✓ | 0.0137457       | 2.84 | 0.0000000       | 0.00 | 0.0000939        | 12.48 | 0.0000000        | 0.00   | 0.347459         | 12.48 | 0.0025911       | 2.85 | 0.0000000       | 0.00 | 0.363056        | 0.11 | 0.0000625        | 15.76 | 0.0000000        | 0.00   | 30.0618         | 0.06 | 0.0002232        | 12.51 | 105.7149        | 0.11 | 4.10391         | 2.84 | 0.0000000       | 0.00 | 0.0182475       | 9.65 |
| 21F16658           | 24.0 % | ✓ | 0.0874947       | 0.63 | 0.0000000       | 0.00 | 0.0002518        | 4.59  | 0.0000000        | 0.00   | 0.931733         | 4.58  | 0.0164927       | 0.65 | 0.0000000       | 0.00 | 0.885717        | 0.10 | 0.0001677        | 10.66 | 0.0000000        | 0.00   | 73.3391         | 0.04 | 0.0005986        | 4.67  | 256.7551        | 0.07 | 26.12241        | 0.64 | 0.0000000       | 0.00 | 0.0445169       | 9.65 |
| 21F16660           | 24.0 % | ✓ | 0.0080324       | 4.57 | 0.0000000       | 0.00 | 0.0001094        | 10.76 | 0.0000000        | 0.00   | 0.404674         | 10.76 | 0.0015141       | 4.58 | 0.0000000       | 0.00 | 0.574322        | 0.10 | 0.0000728        | 14.44 | 0.0000000        | 0.00   | 47.5551         | 0.04 | 0.0002600        | 10.80 | 167.1983        | 0.07 | 2.39817         | 4.57 | 0.0000000       | 0.00 | 0.0288659       | 9.65 |
| 21F16661           | 24.0 % | ✓ | 0.0168697       | 2.28 | 0.0000000       | 0.00 | 0.0001214        | 9.09  | 0.0000000        | 0.00   | 0.449033         | 9.08  | 0.0031799       | 2.29 | 0.0000000       | 0.00 | 0.472131        | 0.10 | 0.0000808        | 13.24 | 0.0000000        | 0.00   | 39.0934         | 0.05 | 0.0002885        | 9.13  | 137.1653        | 0.09 | 5.03661         | 2.29 | 0.0000000       | 0.00 | 0.0237297       | 9.65 |
| 21F16663           | 24.0 % | ✓ | 0.0130507       | 3.25 | 0.0000000       | 0.00 | 0.0000945        | 13.45 | 0.0000000        | 0.00   | 0.349588         | 13.45 | 0.0024601       | 3.25 | 0.0000000       | 0.00 | 0.624550        | 0.10 | 0.0000629        | 16.54 | 0.0000000        | 0.00   | 51.7140         | 0.04 | 0.0002246        | 13.48 | 182.0536        | 0.07 | 3.89642         | 3.25 | 0.0000000       | 0.00 | 0.0313904       | 9.65 |
| 21F16664           | 24.0 % | ✓ | 0.0128046       | 3.23 | 0.0000000       | 0.00 | 0.0000916        | 13.01 | 0.0000000        | 0.00   | 0.338729         | 13.01 | 0.0024137       | 3.24 | 0.0000000       | 0.00 | 0.453904        | 0.10 | 0.0000610        | 16.18 | 0.0000000        | 0.00   | 37.5841         | 0.05 | 0.0002176        | 13.04 | 132.5048        | 0.10 | 3.82294         | 3.23 | 0.0000000       | 0.00 | 0.0228136       | 9.65 |
| 21F16666           | 24.0 % | ✓ | 0.0166718       | 2.42 | 0.0000000       | 0.00 | 0.0001383        | 8.54  | 0.0000000        | 0.00   | 0.511772         | 8.54  | 0.0031426       | 2.43 | 0.0000000       | 0.00 | 0.702100        | 0.10 | 0.0000921        | 12.87 | 0.0000000        | 0.00   | 58.1353         | 0.04 | 0.0003288        | 8.59  | 204.1226        | 0.06 | 4.97754         | 2.42 | 0.0000000       | 0.00 | 0.0352881       | 9.65 |
| 21F16667           | 24.0 % |   | 0.0149584       | 2.52 | 0.0000000       | 0.00 | 0.0000694        | 17.69 | 0.0000000        | 0.00   | 0.256870         | 17.69 | 0.0028197       | 2.52 | 0.0000000       | 0.00 | 0.190872        | 0.12 | 0.0000462        | 20.14 | 0.0000000        | 0.00   | 15.8046         | 0.08 | 0.0001650        | 17.71 | 56.2666         | 0.20 | 4.46597         | 2.52 | 0.0000000       | 0.00 | 0.0095934       | 9.65 |
| 21F16669           | 24.0 % | ✓ | 0.0201516       | 1.99 | 0.0000000       | 0.00 | 0.0001424        | 8.46  | 0.0000000        | 0.00   | 0.526684         | 8.46  | 0.0037986       | 2.00 | 0.0000000       | 0.00 | 1.036365        | 0.10 | 0.0000948        | 12.82 | 0.0000000        | 0.00   | 85.8132         | 0.04 | 0.0003384        | 8.51  | 301.5624        | 0.04 | 6.01645         | 1.99 | 0.0000000       | 0.00 | 0.0520886       | 9.65 |
| 21F16670           | 24.0 % | ✓ | 0.0164592       | 2.42 | 0.0000000       | 0.00 | 0.0000959        | 12.29 | 0.0000000        | 0.00   | 0.354793         | 12.29 | 0.0031026       | 2.43 | 0.0000000       | 0.00 | 0.614399        | 0.10 | 0.0000639        | 15.61 | 0.0000000        | 0.00   | 50.8735         | 0.04 | 0.0002280        | 12.32 | 178.2681        | 0.07 | 4.91406         | 2.42 | 0.0000000       | 0.00 | 0.0308802       | 9.65 |
| 21F16672           | 24.0 % | ✓ | 0.0152945       | 2.63 | 0.0000000       | 0.00 | 0.0001081        | 11.30 | 0.0000004        | 302.65 | 0.399915         | 11.30 | 0.0028830       | 2.64 | 0.0000000       | 0.00 | 0.497869        | 0.10 | 0.0000720        | 14.85 | 0.0031376        | 302.65 | 41.2246         | 0.05 | 0.0002569        | 11.34 | 144.7796        | 0.09 | 4.56632         | 2.63 | 0.0000000       | 0.00 | 0.0250233       | 9.65 |
| 21F16673           | 24.0 % |   | 0.0235242       | 1.80 | 0.0000000       | 0.00 | 0.0000738        | 15.75 | 0.0000000        | 0.00   | 0.272960         | 15.75 | 0.0044343       | 1.81 | 0.0000000       | 0.00 | 0.316671        | 0.11 | 0.0000491        | 18.46 | 0.0000000        | 0.00   | 26.2210         | 0.06 | 0.0001754        | 15.78 | 92.8093         | 0.14 | 7.02338         | 1.81 | 0.0000000       | 0.00 | 0.0159161       | 9.65 |
| 21F16675           | 24.0 % | ✓ | 0.0135015       | 2.94 | 0.0000000       | 0.00 | 0.0001048        | 10.96 | 0.0000000        | 0.00   | 0.387742         | 10.96 | 0.0025450       | 2.95 | 0.0000000       | 0.00 | 0.842350        | 0.10 | 0.0000698        | 14.59 | 0.0000000        | 0.00   | 69.7483         | 0.04 | 0.0002491        | 11.00 | 245.2852        | 0.05 | 4.03101         | 2.94 | 0.0000000       | 0.00 | 0.0423372       | 9.65 |
| 21F16676           | 24.0 % | ✓ | 0.0172058       | 2.45 | 0.0000000       | 0.00 | 0.0000453        | 24.67 | 0.0000000        | 0.00   | 0.167588         | 24.67 | 0.0032433       | 2.46 | 0.0000000       | 0.00 | 0.279768        | 0.11 | 0.0000302        | 26.49 | 0.0000000        | 0.00   | 23.1654         | 0.06 | 0.0001077        | 24.69 | 81.3460         | 0.16 | 5.13696         | 2.46 | 0.0000000       | 0.00 | 0.0140614       | 9.65 |
| 21F16678           | 24.0 % | ✓ | 0.0358653       | 1.31 | 0.0000000       | 0.00 | 0.0000841        | 14.19 | 0.0000001        | #####  | 0.311068         | 14.19 | 0.0067606       | 1.32 | 0.0000000       | 0.00 | 0.308079        | 0.11 | 0.0000560        | 17.15 | 0.0009145        | #####  | 25.5095         | 0.06 | 0.0001999        | 14.22 | 89.5446         | 0.16 | 10.70793        | 1.32 | 0.0000000       | 0.00 | 0.0154843       | 9.65 |
| 21F16679           | 24.0 % | ✓ | 0.0055423       | 6.77 | 0.0000000       | 0.00 | 0.0001044        | 10.97 | 0.0000000        | 0.00   | 0.386367         | 10.97 | 0.0010447       | 6.78 | 0.0000000       | 0.00 | 0.508709        | 0.10 | 0.0000695        | 14.59 | 0.0000000        | 0.00   | 42.1221         | 0.05 | 0.0002482        | 11.00 | 148.2158        | 0.08 | 1.65472         | 6.77 | 0.0000000       | 0.00 | 0.0255681       | 9.65 |
| 21F16681           | 24.0 % | ✓ | 0.0485175       | 0.99 | 0.0000000       | 0.00 | 0.0001294        | 8.64  | 0.0000000        | 0.00   | 0.478723         | 8.64  | 0.0091455       | 1.01 | 0.0000000       | 0.00 | 0.495277        | 0.10 | 0.0000862        | 12.94 | 0.0000000        | 0.00   | 41.0100         | 0.05 | 0.0003076        | 8.69  | 143.9718        | 0.10 | 14.48537        | 1.00 | 0.0000000       | 0.00 | 0.0248931       | 9.65 |
| 21F16682           | 24.0 % |   | 0.0823995       | 0.71 | 0.0000000       | 0.00 | 0.00006176       | 1.89  | 0.0000000        | 0.00   | 2.284730         | 1.88  | 0.0155323       | 0.72 | 0.0000000       | 0.00 | 1.582970        | 0.10 | 0.0004113        | 9.81  | 0.0000000        | 0.00   | 131.0731        | 0.04 | 0.0014679        | 2.10  | 923.7926        | 0.02 | 24.60119        | 0.71 | 0.0000000       | 0.00 | 0.0795614       | 9.65 |
|                    |        |   |                 |      |                 |      |                  |       |                  |        |                  |       |                 |      |                 |      |                 |      |                  |       |                  |        |                 |      |                  |       |                 |      |                 |      |                 |      |                 |      |

| Additional Parameters |        |   | 40Ar/39Ar | 1σ       | 37Ar/39Ar | 1σ       | 36Ar/39Ar | 1σ       | Time (days) | 37Ar (decay) | 39Ar (decay) | 40Ar (moles) |
|-----------------------|--------|---|-----------|----------|-----------|----------|-----------|----------|-------------|--------------|--------------|--------------|
| 21F16639              | 24.0 % | ✓ | 3.646342  | 0.001754 | 0.010467  | 0.000956 | 0.000476  | 0.000009 | 80.913      | 4.956261     | 1.00057196   | 6.155E-12    |
| 21F16640              | 24.0 % | ✓ | 3.575810  | 0.001446 | 0.005857  | 0.000509 | 0.000217  | 0.000004 | 80.919      | 4.956873     | 1.00057201   | 1.198E-11    |
| 21F16642              | 24.0 % | ✓ | 3.569292  | 0.001590 | 0.006781  | 0.000767 | 0.000227  | 0.000007 | 80.931      | 4.958029     | 1.00057209   | 7.408E-12    |
| 21F16643              | 24.0 % | ✓ | 3.667461  | 0.002008 | 0.006637  | 0.001305 | 0.000482  | 0.000012 | 80.937      | 4.958641     | 1.00057214   | 4.304E-12    |
| 21F16645              | 24.0 % | ✓ | 3.563922  | 0.001874 | 0.007819  | 0.001235 | 0.000193  | 0.000011 | 80.949      | 4.959798     | 1.00057222   | 4.661E-12    |
| 21F16646              | 24.0 % |   | 4.048345  | 0.003777 | 0.010558  | 0.003169 | 0.001892  | 0.000031 | 80.955      | 4.960410     | 1.00057226   | 2.044E-12    |
| 21F16648              | 24.0 % |   | 3.912524  | 0.002038 | 0.012508  | 0.001228 | 0.001472  | 0.000014 | 80.967      | 4.961567     | 1.00057235   | 5.178E-12    |
| 21F16649              | 24.0 % | ✓ | 3.725838  | 0.001861 | 0.015836  | 0.001110 | 0.000711  | 0.000011 | 80.973      | 4.962179     | 1.00057239   | 5.483E-12    |
| 21F16651              | 24.0 % | ✓ | 3.565392  | 0.002001 | 0.005956  | 0.001352 | 0.000173  | 0.000012 | 80.985      | 4.963337     | 1.00057247   | 4.118E-12    |
| 21F16652              | 24.0 % | ✓ | 3.572727  | 0.002311 | 0.013150  | 0.001688 | 0.000220  | 0.000015 | 80.991      | 4.963949     | 1.00057252   | 3.268E-12    |
| 21F16654              | 24.0 % | ✓ | 3.630000  | 0.001928 | 0.008046  | 0.001203 | 0.000389  | 0.000011 | 81.003      | 4.965107     | 1.00057260   | 4.586E-12    |
| 21F16655              | 24.0 % | ✓ | 3.592149  | 0.001435 | 0.007694  | 0.000373 | 0.000268  | 0.000004 | 81.008      | 4.965652     | 1.00057264   | 1.448E-11    |
| 21F16657              | 24.0 % | ✓ | 3.653688  | 0.002202 | 0.011558  | 0.001442 | 0.000460  | 0.000013 | 81.021      | 4.966878     | 1.00057273   | 3.888E-12    |
| 21F16658              | 24.0 % | ✓ | 3.857692  | 0.001652 | 0.012704  | 0.000582 | 0.001196  | 0.000008 | 81.026      | 4.967423     | 1.00057277   | 1.002E-11    |
| 21F16660              | 24.0 % | ✓ | 3.566907  | 0.001687 | 0.008510  | 0.000916 | 0.000171  | 0.000008 | 81.039      | 4.968650     | 1.00057286   | 6.005E-12    |
| 21F16661              | 24.0 % | ✓ | 3.638074  | 0.001819 | 0.011486  | 0.001043 | 0.000435  | 0.000010 | 81.044      | 4.969195     | 1.00057290   | 5.035E-12    |
| 21F16663              | 24.0 % | ✓ | 3.596327  | 0.001685 | 0.006760  | 0.000909 | 0.000254  | 0.000008 | 81.056      | 4.970354     | 1.00057298   | 6.584E-12    |
| 21F16664              | 24.0 % | ✓ | 3.627853  | 0.001824 | 0.009013  | 0.001172 | 0.000343  | 0.000011 | 81.063      | 4.970967     | 1.00057302   | 4.827E-12    |
| 21F16666              | 24.0 % | ✓ | 3.597373  | 0.001642 | 0.008803  | 0.000752 | 0.000289  | 0.000007 | 81.074      | 4.972127     | 1.00057311   | 7.403E-12    |
| 21F16667              | 24.0 % |   | 3.843279  | 0.003275 | 0.016253  | 0.002874 | 0.000951  | 0.000024 | 81.081      | 4.972741     | 1.00057315   | 2.150E-12    |
| 21F16669              | 24.0 % | ✓ | 3.584879  | 0.001501 | 0.006138  | 0.000519 | 0.000236  | 0.000005 | 81.092      | 4.973900     | 1.00057323   | 1.089E-11    |
| 21F16670              | 24.0 % | ✓ | 3.601332  | 0.001667 | 0.006974  | 0.000857 | 0.000325  | 0.000008 | 81.099      | 4.974514     | 1.00057328   | 6.486E-12    |
| 21F16672              | 24.0 % | ✓ | 3.623323  | 0.001807 | 0.009701  | 0.001096 | 0.000374  | 0.000010 | 81.110      | 4.975674     | 1.00057336   | 5.288E-12    |
| 21F16673              | 24.0 % |   | 3.807941  | 0.002327 | 0.010410  | 0.001639 | 0.000900  | 0.000016 | 81.117      | 4.976289     | 1.00057341   | 3.535E-12    |
| 21F16675              | 24.0 % | ✓ | 3.575109  | 0.001506 | 0.005559  | 0.000609 | 0.000195  | 0.000006 | 81.128      | 4.977449     | 1.00057349   | 8.827E-12    |
| 21F16676              | 24.0 % | ✓ | 3.733879  | 0.002507 | 0.007234  | 0.001785 | 0.000745  | 0.000018 | 81.135      | 4.978064     | 1.00057353   | 3.062E-12    |
| 21F16678              | 24.0 % | ✓ | 3.930582  | 0.002463 | 0.012194  | 0.001730 | 0.001409  | 0.000018 | 81.147      | 4.979225     | 1.00057362   | 3.549E-12    |
| 21F16679              | 24.0 % | ✓ | 3.558587  | 0.001757 | 0.009173  | 0.001006 | 0.000134  | 0.000009 | 81.153      | 4.979839     | 1.00057366   | 5.306E-12    |
| 21F16681              | 24.0 % | ✓ | 3.864447  | 0.001870 | 0.011673  | 0.001008 | 0.001186  | 0.000012 | 81.165      | 4.981001     | 1.00057374   | 5.610E-12    |
| 21F16682              | 24.0 % |   | 7.236133  | 0.002799 | 0.017431  | 0.000328 | 0.000633  | 0.000004 | 81.170      | 4.981547     | 1.00057378   | 3.358E-11    |

| Procedure<br>Blanks |        | 36Ar ± 1σ (SE)<br>[fA] | 37Ar ± 1σ (SE)<br>[fA] | 38Ar ± 1σ (SE)<br>[fA] | 39Ar ± 1σ (SE)<br>[fA] | 40Ar ± 1σ (SE)<br>[fA] |
|---------------------|--------|------------------------|------------------------|------------------------|------------------------|------------------------|
| 21F16639            | 24.0 % | 0.0174322 ± 0.0002352  | 0.0208924 ± 0.0066213  | 0.0029772 ± 0.0069785  | 0.0134597 ± 0.0066694  | 4.5964677 ± 0.0155172  |
| 21F16640            | 24.0 % | 0.0174322 ± 0.0002352  | 0.0208924 ± 0.0066213  | 0.0029772 ± 0.0069785  | 0.0134597 ± 0.0066694  | 4.5964677 ± 0.0155172  |
| 21F16642            | 24.0 % | 0.0178024 ± 0.0002455  | 0.0120751 ± 0.0066021  | 0.0000054 ± 0.0076364  | 0.0145555 ± 0.0061069  | 4.5733981 ± 0.0155887  |
| 21F16643            | 24.0 % | 0.0178024 ± 0.0002455  | 0.0120751 ± 0.0066021  | 0.0000054 ± 0.0076364  | 0.0145555 ± 0.0061069  | 4.5733981 ± 0.0155887  |
| 21F16645            | 24.0 % | 0.0176873 ± 0.0002348  | 0.0091430 ± 0.0065051  | 0.0067711 ± 0.0070120  | 0.0079418 ± 0.0059536  | 4.4768122 ± 0.0154574  |
| 21F16646            | 24.0 % | 0.0176873 ± 0.0002348  | 0.0091430 ± 0.0065051  | 0.0067711 ± 0.0070120  | 0.0079418 ± 0.0059536  | 4.4768122 ± 0.0154574  |
| 21F16648            | 24.0 % | 0.0164753 ± 0.0002642  | 0.0052086 ± 0.0066287  | 0.0032874 ± 0.0060701  | 0.0080440 ± 0.0056629  | 4.4268513 ± 0.0171726  |
| 21F16649            | 24.0 % | 0.0164753 ± 0.0002642  | 0.0052086 ± 0.0066287  | 0.0032874 ± 0.0060701  | 0.0080440 ± 0.0056629  | 4.4268513 ± 0.0171726  |
| 21F16651            | 24.0 % | 0.0177520 ± 0.0002294  | 0.0096736 ± 0.0059334  | 0.0044975 ± 0.0062090  | 0.0177153 ± 0.0059851  | 4.5053179 ± 0.0155887  |
| 21F16652            | 24.0 % | 0.0177520 ± 0.0002294  | 0.0096736 ± 0.0059334  | 0.0044975 ± 0.0062090  | 0.0177153 ± 0.0059851  | 4.5053179 ± 0.0155887  |
| 21F16654            | 24.0 % | 0.0171826 ± 0.0002316  | 0.0147335 ± 0.0057372  | 0.0041780 ± 0.0068318  | 0.0224009 ± 0.0058114  | 4.3840524 ± 0.0155898  |
| 21F16655            | 24.0 % | 0.0171826 ± 0.0002316  | 0.0147335 ± 0.0057372  | 0.0041780 ± 0.0068318  | 0.0224009 ± 0.0058114  | 4.3840524 ± 0.0155898  |
| 21F16657            | 24.0 % | 0.0170813 ± 0.0002428  | 0.0156326 ± 0.0059359  | 0.0212537 ± 0.0067475  | 0.0155755 ± 0.0063571  | 4.3652366 ± 0.0159060  |
| 21F16658            | 24.0 % | 0.0170813 ± 0.0002428  | 0.0156326 ± 0.0059359  | 0.0212537 ± 0.0067475  | 0.0155755 ± 0.0063571  | 4.3652366 ± 0.0159060  |
| 21F16660            | 24.0 % | 0.0165665 ± 0.0002264  | 0.0155369 ± 0.0056448  | 0.0048451 ± 0.0069604  | 0.0208008 ± 0.0058246  | 4.2763367 ± 0.0163256  |
| 21F16661            | 24.0 % | 0.0165665 ± 0.0002264  | 0.0155369 ± 0.0056448  | 0.0048451 ± 0.0069604  | 0.0208008 ± 0.0058246  | 4.2763367 ± 0.0163256  |
| 21F16663            | 24.0 % | 0.0171742 ± 0.0002516  | 0.0069772 ± 0.0067206  | 0.0093437 ± 0.0067632  | 0.0151476 ± 0.0056979  | 4.2768163 ± 0.0164104  |
| 21F16664            | 24.0 % | 0.0171742 ± 0.0002516  | 0.0069772 ± 0.0067206  | 0.0093437 ± 0.0067632  | 0.0151476 ± 0.0056979  | 4.2768163 ± 0.0164104  |
| 21F16666            | 24.0 % | 0.0166166 ± 0.0002394  | 0.0137336 ± 0.0062699  | 0.0115876 ± 0.0066063  | 0.0147162 ± 0.0070790  | 4.2642141 ± 0.0128038  |
| 21F16667            | 24.0 % | 0.0166166 ± 0.0002394  | 0.0137336 ± 0.0062699  | 0.0115876 ± 0.0066063  | 0.0147162 ± 0.0070790  | 4.2642141 ± 0.0128038  |
| 21F16669            | 24.0 % | 0.0165267 ± 0.0002024  | 0.0139484 ± 0.0064758  | 0.0098235 ± 0.0064766  | 0.0085574 ± 0.0064366  | 4.2619404 ± 0.0162475  |
| 21F16670            | 24.0 % | 0.0165267 ± 0.0002024  | 0.0139484 ± 0.0064758  | 0.0098235 ± 0.0064766  | 0.0085574 ± 0.0064366  | 4.2619404 ± 0.0162475  |
| 21F16672            | 24.0 % | 0.0166072 ± 0.0002386  | 0.0016151 ± 0.0060982  | 0.0064543 ± 0.0065619  | 0.0118670 ± 0.0062666  | 4.1761764 ± 0.0149155  |
| 21F16673            | 24.0 % | 0.0166072 ± 0.0002386  | 0.0016151 ± 0.0060982  | 0.0064543 ± 0.0065619  | 0.0118670 ± 0.0062666  | 4.1761764 ± 0.0149155  |
| 21F16675            | 24.0 % | 0.0166626 ± 0.0002457  | 0.0242586 ± 0.0056104  | 0.0172443 ± 0.0062270  | 0.0201246 ± 0.0057501  | 4.0519643 ± 0.0151222  |
| 21F16676            | 24.0 % | 0.0166626 ± 0.0002457  | 0.0242586 ± 0.0056104  | 0.0172443 ± 0.0062270  | 0.0201246 ± 0.0057501  | 4.0519643 ± 0.0151222  |
| 21F16678            | 24.0 % | 0.0166072 ± 0.0002386  | 0.0016151 ± 0.0060982  | 0.0064543 ± 0.0065619  | 0.0118670 ± 0.0062666  | 4.1761764 ± 0.0149155  |
| 21F16679            | 24.0 % | 0.0166072 ± 0.0002386  | 0.0016151 ± 0.0060982  | 0.0064543 ± 0.0065619  | 0.0118670 ± 0.0062666  | 4.1761764 ± 0.0149155  |
| 21F16681            | 24.0 % | 0.0166626 ± 0.0002457  | 0.0242586 ± 0.0056104  | 0.0172443 ± 0.0062270  | 0.0201246 ± 0.0057501  | 4.0519643 ± 0.0151222  |
| 21F16682            | 24.0 % | 0.0166626 ± 0.0002457  | 0.0242586 ± 0.0056104  | 0.0172443 ± 0.0062270  | 0.0201246 ± 0.0057501  | 4.0519643 ± 0.0151222  |

| Intercept Values |        | 36Ar ± 1σ (SE)<br>[fA] | r2     | Regression<br>(type,n) | 37Ar ± 1σ (SE)<br>[fA] | r2     | Regression<br>(type,n) | 38Ar ± 1σ (SE)<br>[fA] | r2     | Regression<br>(type,n) | 39Ar ± 1σ (SE)<br>[fA] | r2     | Regression<br>(type,n) | 40Ar ± 1σ (SE)<br>[fA] | r2     | Regression<br>(type,n) |
|------------------|--------|------------------------|--------|------------------------|------------------------|--------|------------------------|------------------------|--------|------------------------|------------------------|--------|------------------------|------------------------|--------|------------------------|
| 21F16639         | 24.0 % | 0.0386932 ± 0.0003346  | 0.7407 | EXP 150 of 150         | 0.1208675 ± 0.0062785  | 0.0035 | EXP 150 of 150         | 0.5895130 ± 0.0064724  | 0.5190 | EXP 150 of 150         | 47.55624 ± 0.01067     | 0.9996 | EXP 148 of 150         | 178.47530 ± 0.02402    | 0.9997 | EXP 150 of 150         |
| 21F16640         | 24.0 % | 0.0366923 ± 0.0003012  | 0.8591 | EXP 150 of 150         | 0.1319078 ± 0.0070214  | 0.0193 | EXP 148 of 150         | 1.1509969 ± 0.0074215  | 0.7293 | EXP 150 of 150         | 94.36871 ± 0.01169     | 0.9999 | EXP 149 of 150         | 343.00818 ± 0.02763    | 0.9999 | EXP 146 of 150         |
| 21F16642         | 24.0 % | 0.0302814 ± 0.0003104  | 0.8266 | EXP 150 of 150         | 0.0916698 ± 0.0061163  | 0.0190 | EXP 149 of 150         | 0.6972413 ± 0.0064897  | 0.5728 | EXP 149 of 150         | 58.46582 ± 0.01076     | 0.9997 | EXP 150 of 150         | 213.83083 ± 0.02453    | 0.9998 | EXP 149 of 150         |
| 21F16643         | 24.0 % | 0.0327872 ± 0.0002877  | 0.8165 | EXP 149 of 150         | 0.0561242 ± 0.0056095  | 0.0037 | EXP 148 of 150         | 0.3996270 ± 0.0060639  | 0.3209 | EXP 150 of 150         | 33.06677 ± 0.00992     | 0.9993 | EXP 150 of 150         | 126.15586 ± 0.01906    | 0.9996 | EXP 148 of 150         |
| 21F16645         | 24.0 % | 0.0243707 ± 0.0002831  | 0.8697 | EXP 148 of 150         | 0.0669597 ± 0.0064035  | 0.0002 | EXP 150 of 150         | 0.4368719 ± 0.0068551  | 0.2829 | EXP 149 of 150         | 36.84256 ± 0.01026     | 0.9994 | EXP 150 of 150         | 136.14756 ± 0.02070    | 0.9996 | EXP 150 of 150         |
| 21F16646         | 24.0 % | 0.0429858 ± 0.0003314  | 0.6094 | EXP 150 of 150         | 0.0392720 ± 0.0062832  | 0.0038 | EXP 150 of 150         | 0.1738056 ± 0.0067937  | 0.0480 | EXP 150 of 150         | 14.22438 ± 0.00883     | 0.9967 | EXP 150 of 150         | 62.20306 ± 0.01854     | 0.9956 | EXP 148 of 150         |
| 21F16648         | 24.0 % | 0.0680659 ± 0.0003913  | 0.1241 | EXP 149 of 150         | 0.0987756 ± 0.0063599  | 0.0301 | EXP 150 of 150         | 0.4513149 ± 0.0060182  | 0.3493 | EXP 150 of 150         | 37.28448 ± 0.01031     | 0.9994 | EXP 150 of 150         | 150.71068 ± 0.02248    | 0.9997 | EXP 148 of 150         |
| 21F16649         | 24.0 % | 0.0441752 ± 0.0003461  | 0.6603 | EXP 148 of 150         | 0.1369132 ± 0.0064175  | 0.0268 | EXP 150 of 150         | 0.5016701 ± 0.0061239  | 0.3810 | EXP 150 of 150         | 41.45500 ± 0.01043     | 0.9995 | EXP 150 of 150         | 159.31622 ± 0.02242    | 0.9997 | EXP 150 of 150         |
| 21F16651         | 24.0 % | 0.0230432 ± 0.0002675  | 0.8605 | EXP 150 of 150         | 0.0485429 ± 0.0065271  | 0.0023 | EXP 150 of 150         | 0.4007606 ± 0.0062275  | 0.3695 | EXP 149 of 150         | 32.54967 ± 0.00997     | 0.9992 | EXP 150 of 150         | 120.84355 ± 0.02169    | 0.9994 | EXP 150 of 150         |
| 21F16652         | 24.0 % | 0.0230860 ± 0.0002679  | 0.8413 | EXP 150 of 150         | 0.0776290 ± 0.0063901  | 0.0299 | EXP 150 of 150         | 0.3077273 ± 0.0073562  | 0.1044 | EXP 150 of 150         | 25.78151 ± 0.00944     | 0.9989 | EXP 150 of 150         | 96.82934 ± 0.02392     | 0.9987 | EXP 150 of 150         |
| 21F16654         | 24.0 % | 0.0302135 ± 0.0003056  | 0.7850 | EXP 150 of 150         | 0.0721382 ± 0.0063807  | 0.0097 | EXP 150 of 150         | 0.4322057 ± 0.0063355  | 0.3215 | EXP 150 of 150         | 35.59983 ± 0.00987     | 0.9994 | EXP 149 of 150         | 133.91879 ± 0.02229    | 0.9996 | EXP 147 of 150         |
| 21F16655         | 24.0 % | 0.0457594 ± 0.0003186  | 0.7987 | EXP 149 of 150         | 0.1899314 ± 0.0062535  | 0.0507 | EXP 150 of 150         | 1.3788587 ± 0.0067439  | 0.8322 | EXP 150 of 150         | 113.57651 ± 0.01436    | 0.9999 | EXP 150 of 150         | 413.51491 ± 0.02921    | 0.9999 | EXP 149 of 150         |
| 21F16657         | 24.0 % | 0.0300571 ± 0.0002734  | 0.8350 | EXP 147 of 150         | 0.0850775 ± 0.0063106  | 0.0033 | EXP 150 of 150         | 0.3723644 ± 0.0062709  | 0.3136 | EXP 150 of 150         | 29.98734 ± 0.01085     | 0.9989 | EXP 150 of 150         | 114.20231 ± 0.01959    | 0.9995 | EXP 149 of 150         |
| 21F16658         | 24.0 % | 0.0993511 ± 0.0004402  | 0.0444 | EXP 144 of 150         | 0.2018333 ± 0.0061101  | 0.1042 | EXP 148 of 150         | 0.8970328 ± 0.0067847  | 0.6394 | EXP 150 of 150         | 73.13523 ± 0.01202     | 0.9998 | EXP 150 of 150         | 287.28731 ± 0.02997    | 0.9999 | EXP 150 of 150         |
| 21F16660         | 24.0 % | 0.0242001 ± 0.0002590  | 0.8750 | EXP 150 of 150         | 0.0963885 ± 0.0066154  | 0.0065 | EXP 150 of 150         | 0.5748892 ± 0.0064659  | 0.4947 | EXP 149 of 150         | 47.43341 ± 0.01017     | 0.9996 | EXP 150 of 150         | 173.90172 ± 0.02333    | 0.9998 | EXP 149 of 150         |
| 21F16661         | 24.0 % | 0.0324970 ± 0.0002803  | 0.7987 | EXP 150 of 150         | 0.1052413 ± 0.0058724  | 0.0530 | EXP 148 of 150         | 0.4706021 ± 0.0070209  | 0.3015 | EXP 150 of 150         | 38.99715 ± 0.00912     | 0.9996 | EXP 150 of 150         | 146.50198 ± 0.02264    | 0.9996 | EXP 150 of 150         |
| 21F16663         | 24.0 % | 0.0294989 ± 0.0003072  | 0.7980 | EXP 150 of 150         | 0.0767990 ± 0.0065582  | 0.0002 | EXP 150 of 150         | 0.6197497 ± 0.0063560  | 0.4614 | EXP 150 of 150         | 51.57421 ± 0.01156     | 0.9996 | EXP 150 of 150         | 190.25822 ± 0.02265    | 0.9998 | EXP 149 of 150         |
| 21F16664         | 24.0 % | 0.0292654 ± 0.0002948  | 0.7971 | EXP 150 of 150         | 0.0746219 ± 0.0056742  | 0.0130 | EXP 148 of 150         | 0.4576130 ± 0.0065494  | 0.3842 | EXP 149 of 150         | 37.48672 ± 0.00885     | 0.9995 | EXP 150 of 150         | 140.62738 ± 0.02160    | 0.9996 | EXP 150 of 150         |
| 21F16666         | 24.0 % | 0.0323776 ± 0.0002918  | 0.8138 | EXP 150 of 150         | 0.1159111 ± 0.0060669  | 0.0168 | EXP 150 of 150         | 0.6943986 ± 0.0071042  | 0.4756 | EXP 150 of 150         | 57.97585 ± 0.01184     | 0.9997 | EXP 150 of 150         | 213.39965 ± 0.02434    | 0.9998 | EXP 148 of 150         |
| 21F16667         | 24.0 % | 0.0307065 ± 0.0002588  | 0.7862 | EXP 148 of 150         | 0.0650126 ± 0.0065513  | 0.0047 | EXP 150 of 150         | 0.2010698 ± 0.0069974  | 0.1081 | EXP 150 of 150         | 15.77205 ± 0.00783     | 0.9979 | EXP 149 of 150         | 65.00635 ± 0.01910     | 0.9965 | EXP 150 of 150         |
| 21F16669         | 24.0 % | 0.0355540 ± 0.0003151  | 0.7869 | EXP 150 of 150         | 0.1190656 ± 0.0060876  | 0.0049 | EXP 150 of 150         | 1.0357415 ± 0.0066036  | 0.7437 | EXP 150 of 150         | 85.56451 ± 0.01367     | 0.9998 | EXP 150 of 150         | 311.89293 ± 0.02592    | 0.9999 | EXP 150 of 150         |
| 21F16670         | 24.0 % | 0.0320486 ± 0.0003132  | 0.7748 | EXP 150 of 150         | 0.0847504 ± 0.0058042  | 0.0004 | EXP 149 of 150         | 0.6106239 ± 0.0063976  | 0.4740 | EXP 150 of 150         | 50.72957 ± 0.01033     | 0.9997 | EXP 149 of 150         | 187.47501 ± 0.02198    | 0.9998 | EXP 149 of 150         |
| 21F16672         | 24.0 % | 0.0310488 ± 0.0002914  | 0.7754 | EXP 150 of 150         | 0.0814031 ± 0.0066354  | 0.0062 | EXP 150 of 150         | 0.5079631 ± 0.0066767  | 0.4482 | EXP 148 of 150         | 41.11299 ± 0.01013     | 0.9995 | EXP 149 of 150         | 153.54714 ± 0.02129    | 0.9997 | EXP 150 of 150         |
| 21F16673         | 24.0 % | 0.0387322 ± 0.0003168  | 0.6801 | EXP 149 of 150         | 0.0560673 ± 0.0060277  | 0.0006 | EXP 150 of 150         | 0.3239382 ± 0.0068025  | 0.1882 | EXP 150 of 150         | 26.15431 ± 0.00874     | 0.9991 | EXP 147 of 150         | 104.02475 ± 0.02178    | 0.9992 | EXP 150 of 150         |
| 21F16675         | 24.0 % | 0.0294197 ± 0.0002791  | 0.8535 | EXP 150 of 150         | 0.1015902 ± 0.0063516  | 0.0059 | EXP 149 of 150         | 0.8271119 ± 0.0060543  | 0.6665 | EXP 150 of 150         | 69.55928 ± 0.01027     | 0.9998 | EXP 147 of 150         | 253.41049 ± 0.02598    | 0.9999 | EXP 150 of 150         |
| 21F16676         | 24.0 % | 0.0328370 ± 0.0003092  | 0.7494 | EXP 150 of 150         | 0.0576785 ± 0.0060422  | 0.0201 | EXP 148 of 150         | 0.2819301 ± 0.0070027  | 0.1154 | EXP 150 of 150         | 23.11606 ± 0.00927     | 0.9987 | EXP 150 of 150         | 90.54901 ± 0.02167     | 0.9986 | EXP 150 of 150         |
| 21F16678         | 24.0 % | 0.0503128 ± 0.0003677  | 0.5010 | EXP 150 of 150         | 0.0636327 ± 0.0063438  | 0.0014 | EXP 150 of 150         | 0.3207266 ± 0.0062740  | 0.2389 | EXP 148 of 150         | 25.44502 ± 0.00936     | 0.9989 | EXP 150 of 150         | 104.44423 ± 0.02008    | 0.9992 | EXP 150 of 150         |
| 21F16679         | 24.0 % | 0.0219015 ± 0.0002585  | 0.8744 | EXP 150 of 150         | 0.0786357 ± 0.0058398  | 0.0026 | EXP 149 of 150         | 0.5051741 ± 0.0071043  | 0.3199 | EXP 149 of 150         | 42.00780 ± 0.00992     | 0.9996 | EXP 148 of 150         | 154.07226 ± 0.02196    | 0.9997 | EXP 150 of 150         |
| 21F16681         | 24.0 % | 0.0622732 ± 0.0003736  | 0.3025 | EXP 148 of 150         | 0.1196675 ± 0.0060323  | 0.0510 | EXP 150 of 150         | 0.5119080 ± 0.0070124  | 0.3968 | EXP 150 of 150         | 40.90731 ± 0.00938     | 0.9996 | EXP 150 of 150         | 162.53400 ± 0.02138    | 0.9998 | EXP 149 of 150         |
| 21F16682         | 24.0 % | 0.0944982 ± 0.0004740  | 0.4255 | EXP 149 of 150         | 0.4795527 ± 0.0063752  | 0.2889 | EXP 150 of 150         | 1.5933307 ± 0.0071879  | 0.8467 | EXP 150 of 150         | 130.70128 ± 0.01366    | 0.9999 | EXP 149 of 150         | 952.52534 ± 0.04455    | 1.0000 | EXP 148 of 150         |

| Project Info |        | Analyst     | Irradiation | X-pos | Y-pos | Z/H-pos | Project                | Experiment | Nmb |
|--------------|--------|-------------|-------------|-------|-------|---------|------------------------|------------|-----|
| 21F16639     | 24.0 % | Dan Miggins | 21-OSU-04   | 0.00  | 0.00  | 17.08   | Oregon\Swenton (20-01) | 21F16635   | 01  |
| 21F16640     | 24.0 % | Dan Miggins | 21-OSU-04   | 0.00  | 0.00  | 17.08   | Oregon\Swenton (20-01) | 21F16635   | 01  |
| 21F16642     | 24.0 % | Dan Miggins | 21-OSU-04   | 0.00  | 0.00  | 17.08   | Oregon\Swenton (20-01) | 21F16635   | 01  |
| 21F16643     | 24.0 % | Dan Miggins | 21-OSU-04   | 0.00  | 0.00  | 17.08   | Oregon\Swenton (20-01) | 21F16635   | 01  |
| 21F16645     | 24.0 % | Dan Miggins | 21-OSU-04   | 0.00  | 0.00  | 17.08   | Oregon\Swenton (20-01) | 21F16635   | 01  |
| 21F16646     | 24.0 % | Dan Miggins | 21-OSU-04   | 0.00  | 0.00  | 17.08   | Oregon\Swenton (20-01) | 21F16635   | 01  |
| 21F16648     | 24.0 % | Dan Miggins | 21-OSU-04   | 0.00  | 0.00  | 17.08   | Oregon\Swenton (20-01) | 21F16635   | 01  |
| 21F16649     | 24.0 % | Dan Miggins | 21-OSU-04   | 0.00  | 0.00  | 17.08   | Oregon\Swenton (20-01) | 21F16635   | 01  |
| 21F16651     | 24.0 % | Dan Miggins | 21-OSU-04   | 0.00  | 0.00  | 17.08   | Oregon\Swenton (20-01) | 21F16635   | 01  |
| 21F16652     | 24.0 % | Dan Miggins | 21-OSU-04   | 0.00  | 0.00  | 17.08   | Oregon\Swenton (20-01) | 21F16635   | 01  |
| 21F16654     | 24.0 % | Dan Miggins | 21-OSU-04   | 0.00  | 0.00  | 17.08   | Oregon\Swenton (20-01) | 21F16635   | 01  |
| 21F16655     | 24.0 % | Dan Miggins | 21-OSU-04   | 0.00  | 0.00  | 17.08   | Oregon\Swenton (20-01) | 21F16635   | 01  |
| 21F16657     | 24.0 % | Dan Miggins | 21-OSU-04   | 0.00  | 0.00  | 17.08   | Oregon\Swenton (20-01) | 21F16635   | 01  |
| 21F16658     | 24.0 % | Dan Miggins | 21-OSU-04   | 0.00  | 0.00  | 17.08   | Oregon\Swenton (20-01) | 21F16635   | 01  |
| 21F16660     | 24.0 % | Dan Miggins | 21-OSU-04   | 0.00  | 0.00  | 17.08   | Oregon\Swenton (20-01) | 21F16635   | 01  |
| 21F16661     | 24.0 % | Dan Miggins | 21-OSU-04   | 0.00  | 0.00  | 17.08   | Oregon\Swenton (20-01) | 21F16635   | 01  |
| 21F16663     | 24.0 % | Dan Miggins | 21-OSU-04   | 0.00  | 0.00  | 17.08   | Oregon\Swenton (20-01) | 21F16635   | 01  |
| 21F16664     | 24.0 % | Dan Miggins | 21-OSU-04   | 0.00  | 0.00  | 17.08   | Oregon\Swenton (20-01) | 21F16635   | 01  |
| 21F16666     | 24.0 % | Dan Miggins | 21-OSU-04   | 0.00  | 0.00  | 17.08   | Oregon\Swenton (20-01) | 21F16635   | 01  |
| 21F16667     | 24.0 % | Dan Miggins | 21-OSU-04   | 0.00  | 0.00  | 17.08   | Oregon\Swenton (20-01) | 21F16635   | 01  |
| 21F16669     | 24.0 % | Dan Miggins | 21-OSU-04   | 0.00  | 0.00  | 17.08   | Oregon\Swenton (20-01) | 21F16635   | 01  |
| 21F16670     | 24.0 % | Dan Miggins | 21-OSU-04   | 0.00  | 0.00  | 17.08   | Oregon\Swenton (20-01) | 21F16635   | 01  |
| 21F16672     | 24.0 % | Dan Miggins | 21-OSU-04   | 0.00  | 0.00  | 17.08   | Oregon\Swenton (20-01) | 21F16635   | 01  |
| 21F16673     | 24.0 % | Dan Miggins | 21-OSU-04   | 0.00  | 0.00  | 17.08   | Oregon\Swenton (20-01) | 21F16635   | 01  |
| 21F16675     | 24.0 % | Dan Miggins | 21-OSU-04   | 0.00  | 0.00  | 17.08   | Oregon\Swenton (20-01) | 21F16635   | 01  |
| 21F16676     | 24.0 % | Dan Miggins | 21-OSU-04   | 0.00  | 0.00  | 17.08   | Oregon\Swenton (20-01) | 21F16635   | 01  |
| 21F16678     | 24.0 % | Dan Miggins | 21-OSU-04   | 0.00  | 0.00  | 17.08   | Oregon\Swenton (20-01) | 21F16635   | 01  |
| 21F16679     | 24.0 % | Dan Miggins | 21-OSU-04   | 0.00  | 0.00  | 17.08   | Oregon\Swenton (20-01) | 21F16635   | 01  |
| 21F16681     | 24.0 % | Dan Miggins | 21-OSU-04   | 0.00  | 0.00  | 17.08   | Oregon\Swenton (20-01) | 21F16635   | 01  |
| 21F16682     | 24.0 % | Dan Miggins | 21-OSU-04   | 0.00  | 0.00  | 17.08   | Oregon\Swenton (20-01) | 21F16635   | 01  |



| Sample Parameters |        | Sample   | Material | Location   | Standard Name    | Standard (in Ma) | %1σ   | Standard Reference  | Standard 40Ar/39Ar | %1σ   | J          | %1σ   | Air 40Ar/36Ar | %1σ   | MDF (lin)  | %1σ   | Volume Ratio | Sensitivity (mol/volt) | Day | Month | Year | Hour | Min | Resist |
|-------------------|--------|----------|----------|------------|------------------|------------------|-------|---------------------|--------------------|-------|------------|-------|---------------|-------|------------|-------|--------------|------------------------|-----|-------|------|------|-----|--------|
| 21F16639          | 24.0 % | VS19-089 | Sanidine | Circle Bar | FCT-NM (4X16-21) | 28.201           | 0.082 | Kuiper et al (2008) | 9.43768            | 0.112 | 0.00164505 | 0.112 | 301.492       | 0.105 | 0.99756562 | 0.037 | 1            | 3.54E-14               | 5   | SEP   | 2021 | 13   | 25  | 1      |
| 21F16640          | 24.0 % | VS19-089 | Sanidine | Circle Bar | FCT-NM (4X16-21) | 28.201           | 0.082 | Kuiper et al (2008) | 9.43768            | 0.112 | 0.00164505 | 0.112 | 301.492       | 0.105 | 0.99756562 | 0.037 | 1            | 3.54E-14               | 5   | SEP   | 2021 | 13   | 34  | 1      |
| 21F16642          | 24.0 % | VS19-089 | Sanidine | Circle Bar | FCT-NM (4X16-21) | 28.201           | 0.082 | Kuiper et al (2008) | 9.43768            | 0.112 | 0.00164505 | 0.112 | 301.492       | 0.105 | 0.99756562 | 0.037 | 1            | 3.54E-14               | 5   | SEP   | 2021 | 13   | 51  | 1      |
| 21F16643          | 24.0 % | VS19-089 | Sanidine | Circle Bar | FCT-NM (4X16-21) | 28.201           | 0.082 | Kuiper et al (2008) | 9.43768            | 0.112 | 0.00164505 | 0.112 | 301.492       | 0.105 | 0.99756562 | 0.037 | 1            | 3.54E-14               | 5   | SEP   | 2021 | 14   | 0   | 1      |
| 21F16645          | 24.0 % | VS19-089 | Sanidine | Circle Bar | FCT-NM (4X16-21) | 28.201           | 0.082 | Kuiper et al (2008) | 9.43768            | 0.112 | 0.00164505 | 0.112 | 301.492       | 0.105 | 0.99756562 | 0.037 | 1            | 3.54E-14               | 5   | SEP   | 2021 | 14   | 17  | 1      |
| 21F16646          | 24.0 % | VS19-089 | Sanidine | Circle Bar | FCT-NM (4X16-21) | 28.201           | 0.082 | Kuiper et al (2008) | 9.43768            | 0.112 | 0.00164505 | 0.112 | 301.492       | 0.105 | 0.99756562 | 0.037 | 1            | 3.54E-14               | 5   | SEP   | 2021 | 14   | 26  | 1      |
| 21F16648          | 24.0 % | VS19-089 | Sanidine | Circle Bar | FCT-NM (4X16-21) | 28.201           | 0.082 | Kuiper et al (2008) | 9.43768            | 0.112 | 0.00164505 | 0.112 | 301.492       | 0.105 | 0.99756562 | 0.037 | 1            | 3.54E-14               | 5   | SEP   | 2021 | 14   | 43  | 1      |
| 21F16649          | 24.0 % | VS19-089 | Sanidine | Circle Bar | FCT-NM (4X16-21) | 28.201           | 0.082 | Kuiper et al (2008) | 9.43768            | 0.112 | 0.00164505 | 0.112 | 301.492       | 0.105 | 0.99756562 | 0.037 | 1            | 3.54E-14               | 5   | SEP   | 2021 | 14   | 52  | 1      |
| 21F16651          | 24.0 % | VS19-089 | Sanidine | Circle Bar | FCT-NM (4X16-21) | 28.201           | 0.082 | Kuiper et al (2008) | 9.43768            | 0.112 | 0.00164505 | 0.112 | 301.492       | 0.105 | 0.99756562 | 0.037 | 1            | 3.54E-14               | 5   | SEP   | 2021 | 15   | 9   | 1      |
| 21F16652          | 24.0 % | VS19-089 | Sanidine | Circle Bar | FCT-NM (4X16-21) | 28.201           | 0.082 | Kuiper et al (2008) | 9.43768            | 0.112 | 0.00164505 | 0.112 | 301.492       | 0.105 | 0.99756562 | 0.037 | 1            | 3.54E-14               | 5   | SEP   | 2021 | 15   | 18  | 1      |
| 21F16654          | 24.0 % | VS19-089 | Sanidine | Circle Bar | FCT-NM (4X16-21) | 28.201           | 0.082 | Kuiper et al (2008) | 9.43768            | 0.112 | 0.00164505 | 0.112 | 301.492       | 0.105 | 0.99756562 | 0.037 | 1            | 3.54E-14               | 5   | SEP   | 2021 | 15   | 35  | 1      |
| 21F16655          | 24.0 % | VS19-089 | Sanidine | Circle Bar | FCT-NM (4X16-21) | 28.201           | 0.082 | Kuiper et al (2008) | 9.43768            | 0.112 | 0.00164505 | 0.112 | 301.492       | 0.105 | 0.99756562 | 0.037 | 1            | 3.54E-14               | 5   | SEP   | 2021 | 15   | 43  | 1      |
| 21F16657          | 24.0 % | VS19-089 | Sanidine | Circle Bar | FCT-NM (4X16-21) | 28.201           | 0.082 | Kuiper et al (2008) | 9.43768            | 0.112 | 0.00164505 | 0.112 | 301.492       | 0.105 | 0.99756562 | 0.037 | 1            | 3.54E-14               | 5   | SEP   | 2021 | 16   | 1   | 1      |
| 21F16658          | 24.0 % | VS19-089 | Sanidine | Circle Bar | FCT-NM (4X16-21) | 28.201           | 0.082 | Kuiper et al (2008) | 9.43768            | 0.112 | 0.00164505 | 0.112 | 301.492       | 0.105 | 0.99756562 | 0.037 | 1            | 3.54E-14               | 5   | SEP   | 2021 | 16   | 9   | 1      |
| 21F16660          | 24.0 % | VS19-089 | Sanidine | Circle Bar | FCT-NM (4X16-21) | 28.201           | 0.082 | Kuiper et al (2008) | 9.43768            | 0.112 | 0.00164505 | 0.112 | 301.492       | 0.105 | 0.99756562 | 0.037 | 1            | 3.54E-14               | 5   | SEP   | 2021 | 16   | 27  | 1      |
| 21F16661          | 24.0 % | VS19-089 | Sanidine | Circle Bar | FCT-NM (4X16-21) | 28.201           | 0.082 | Kuiper et al (2008) | 9.43768            | 0.112 | 0.00164505 | 0.112 | 301.492       | 0.105 | 0.99756562 | 0.037 | 1            | 3.54E-14               | 5   | SEP   | 2021 | 16   | 35  | 1      |
| 21F16663          | 24.0 % | VS19-089 | Sanidine | Circle Bar | FCT-NM (4X16-21) | 28.201           | 0.082 | Kuiper et al (2008) | 9.43768            | 0.112 | 0.00164505 | 0.112 | 301.492       | 0.105 | 0.99756562 | 0.037 | 1            | 3.54E-14               | 5   | SEP   | 2021 | 16   | 52  | 1      |
| 21F16664          | 24.0 % | VS19-089 | Sanidine | Circle Bar | FCT-NM (4X16-21) | 28.201           | 0.082 | Kuiper et al (2008) | 9.43768            | 0.112 | 0.00164505 | 0.112 | 301.492       | 0.105 | 0.99756562 | 0.037 | 1            | 3.54E-14               | 5   | SEP   | 2021 | 17   | 1   | 1      |
| 21F16666          | 24.0 % | VS19-089 | Sanidine | Circle Bar | FCT-NM (4X16-21) | 28.201           | 0.082 | Kuiper et al (2008) | 9.43768            | 0.112 | 0.00164505 | 0.112 | 301.492       | 0.105 | 0.99756562 | 0.037 | 1            | 3.54E-14               | 5   | SEP   | 2021 | 17   | 18  | 1      |
| 21F16667          | 24.0 % | VS19-089 | Sanidine | Circle Bar | FCT-NM (4X16-21) | 28.201           | 0.082 | Kuiper et al (2008) | 9.43768            | 0.112 | 0.00164505 | 0.112 | 301.492       | 0.105 | 0.99756562 | 0.037 | 1            | 3.54E-14               | 5   | SEP   | 2021 | 17   | 27  | 1      |
| 21F16669          | 24.0 % | VS19-089 | Sanidine | Circle Bar | FCT-NM (4X16-21) | 28.201           | 0.082 | Kuiper et al (2008) | 9.43768            | 0.112 | 0.00164505 | 0.112 | 301.492       | 0.105 | 0.99756562 | 0.037 | 1            | 3.54E-14               | 5   | SEP   | 2021 | 17   | 44  | 1      |
| 21F16670          | 24.0 % | VS19-089 | Sanidine | Circle Bar | FCT-NM (4X16-21) | 28.201           | 0.082 | Kuiper et al (2008) | 9.43768            | 0.112 | 0.00164505 | 0.112 | 301.492       | 0.105 | 0.99756562 | 0.037 | 1            | 3.54E-14               | 5   | SEP   | 2021 | 17   | 53  | 1      |
| 21F16672          | 24.0 % | VS19-089 | Sanidine | Circle Bar | FCT-NM (4X16-21) | 28.201           | 0.082 | Kuiper et al (2008) | 9.43768            | 0.112 | 0.00164505 | 0.112 | 301.492       | 0.105 | 0.99756562 | 0.037 | 1            | 3.54E-14               | 5   | SEP   | 2021 | 18   | 10  | 1      |
| 21F16673          | 24.0 % | VS19-089 | Sanidine | Circle Bar | FCT-NM (4X16-21) | 28.201           | 0.082 | Kuiper et al (2008) | 9.43768            | 0.112 | 0.00164505 | 0.112 | 301.492       | 0.105 | 0.99756562 | 0.037 | 1            | 3.54E-14               | 5   | SEP   | 2021 | 18   | 19  | 1      |
| 21F16675          | 24.0 % | VS19-089 | Sanidine | Circle Bar | FCT-NM (4X16-21) | 28.201           | 0.082 | Kuiper et al (2008) | 9.43768            | 0.112 | 0.00164505 | 0.112 | 301.492       | 0.105 | 0.99756562 | 0.037 | 1            | 3.54E-14               | 5   | SEP   | 2021 | 18   | 36  | 1      |
| 21F16676          | 24.0 % | VS19-089 | Sanidine | Circle Bar | FCT-NM (4X16-21) | 28.201           | 0.082 | Kuiper et al (2008) | 9.43768            | 0.112 | 0.00164505 | 0.112 | 301.492       | 0.105 | 0.99756562 | 0.037 | 1            | 3.54E-14               | 5   | SEP   | 2021 | 18   | 45  | 1      |
| 21F16678          | 24.0 % | VS19-089 | Sanidine | Circle Bar | FCT-NM (4X16-21) | 28.201           | 0.082 | Kuiper et al (2008) | 9.43768            | 0.112 | 0.00164505 | 0.112 | 301.492       | 0.105 | 0.99756562 | 0.037 | 1            | 3.54E-14               | 5   | SEP   | 2021 | 19   | 2   | 1      |
| 21F16679          | 24.0 % | VS19-089 | Sanidine | Circle Bar | FCT-NM (4X16-21) | 28.201           | 0.082 | Kuiper et al (2008) | 9.43768            | 0.112 | 0.00164505 | 0.112 | 301.492       | 0.105 | 0.99756562 | 0.037 | 1            | 3.54E-14               | 5   | SEP   | 2021 | 19   | 11  | 1      |
| 21F16681          | 24.0 % | VS19-089 | Sanidine | Circle Bar | FCT-NM (4X16-21) | 28.201           | 0.082 | Kuiper et al (2008) | 9.43768            | 0.112 | 0.00164505 | 0.112 | 301.492       | 0.105 | 0.99756562 | 0.037 | 1            | 3.54E-14               | 5   | SEP   | 2021 | 19   | 28  | 1      |
| 21F16682          | 24.0 % | VS19-089 | Sanidine | Circle Bar | FCT-NM (4X16-21) | 28.201           | 0.082 | Kuiper et al (2008) | 9.43768            | 0.112 | 0.00164505 | 0.112 | 301.492       | 0.105 | 0.99756562 | 0.037 | 1            | 3.54E-14               | 5   | SEP   | 2021 | 19   | 36  | 1      |





21F16635.AGE >>> VS19-089 >>> OREGON | SWENTON (20-01) PROJECT

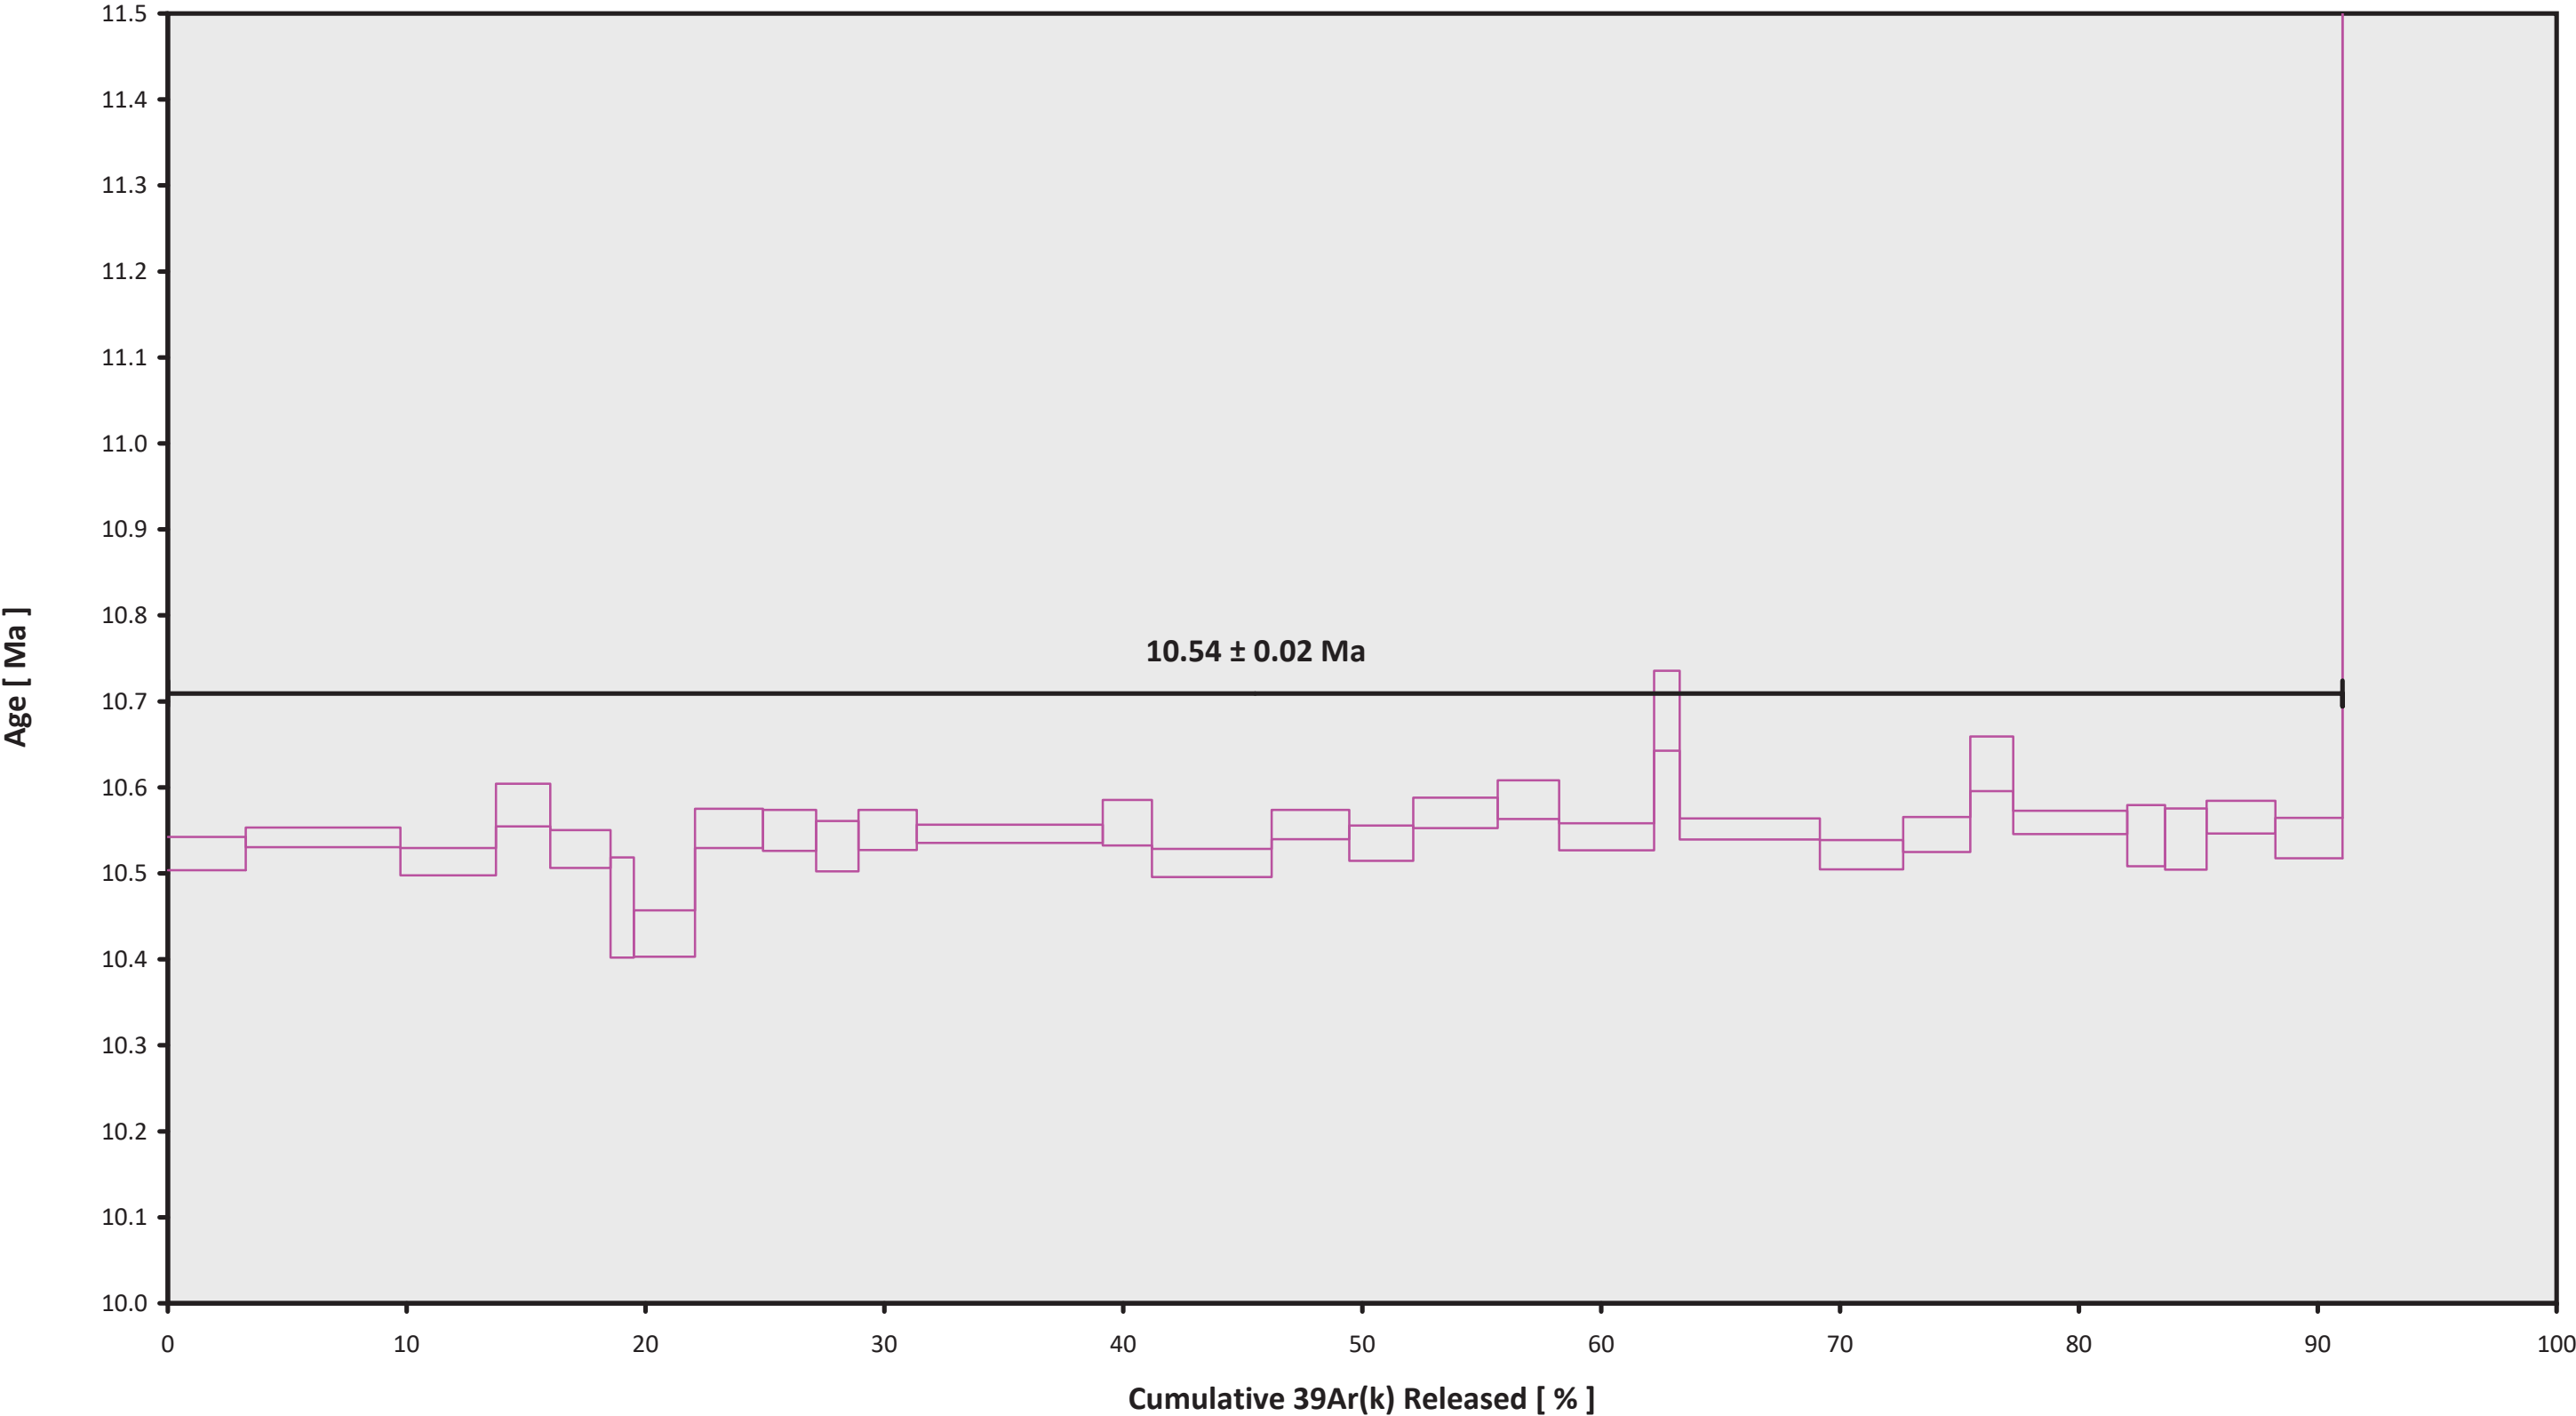

Ar-Ages in Ma

WEIGHTED PLATEAU

10.54 ± 0.02

TOTAL FUSION

11.49 ± 0.03

NORMAL ISOCHRON

10.55 ± 0.03

INVERSE ISOCHRON

10.55 ± 0.03

MSWD (PROBABILITY)

3.84 (0%)

ASSUMED TRAPPED 40AR/36AR RATIO

Standard 40/36 = 298.56 ± 0.104 %SD

Sample Info

Sanidine

Circle Bar

Dan Miggins

IRR = 21-OSU-04 (4X16-21)

J = 0.00164505 ± 0.00000184

21F16635.AGE >>> VS19-089 >>> OREGON | SWENTON (20-01) PROJECT

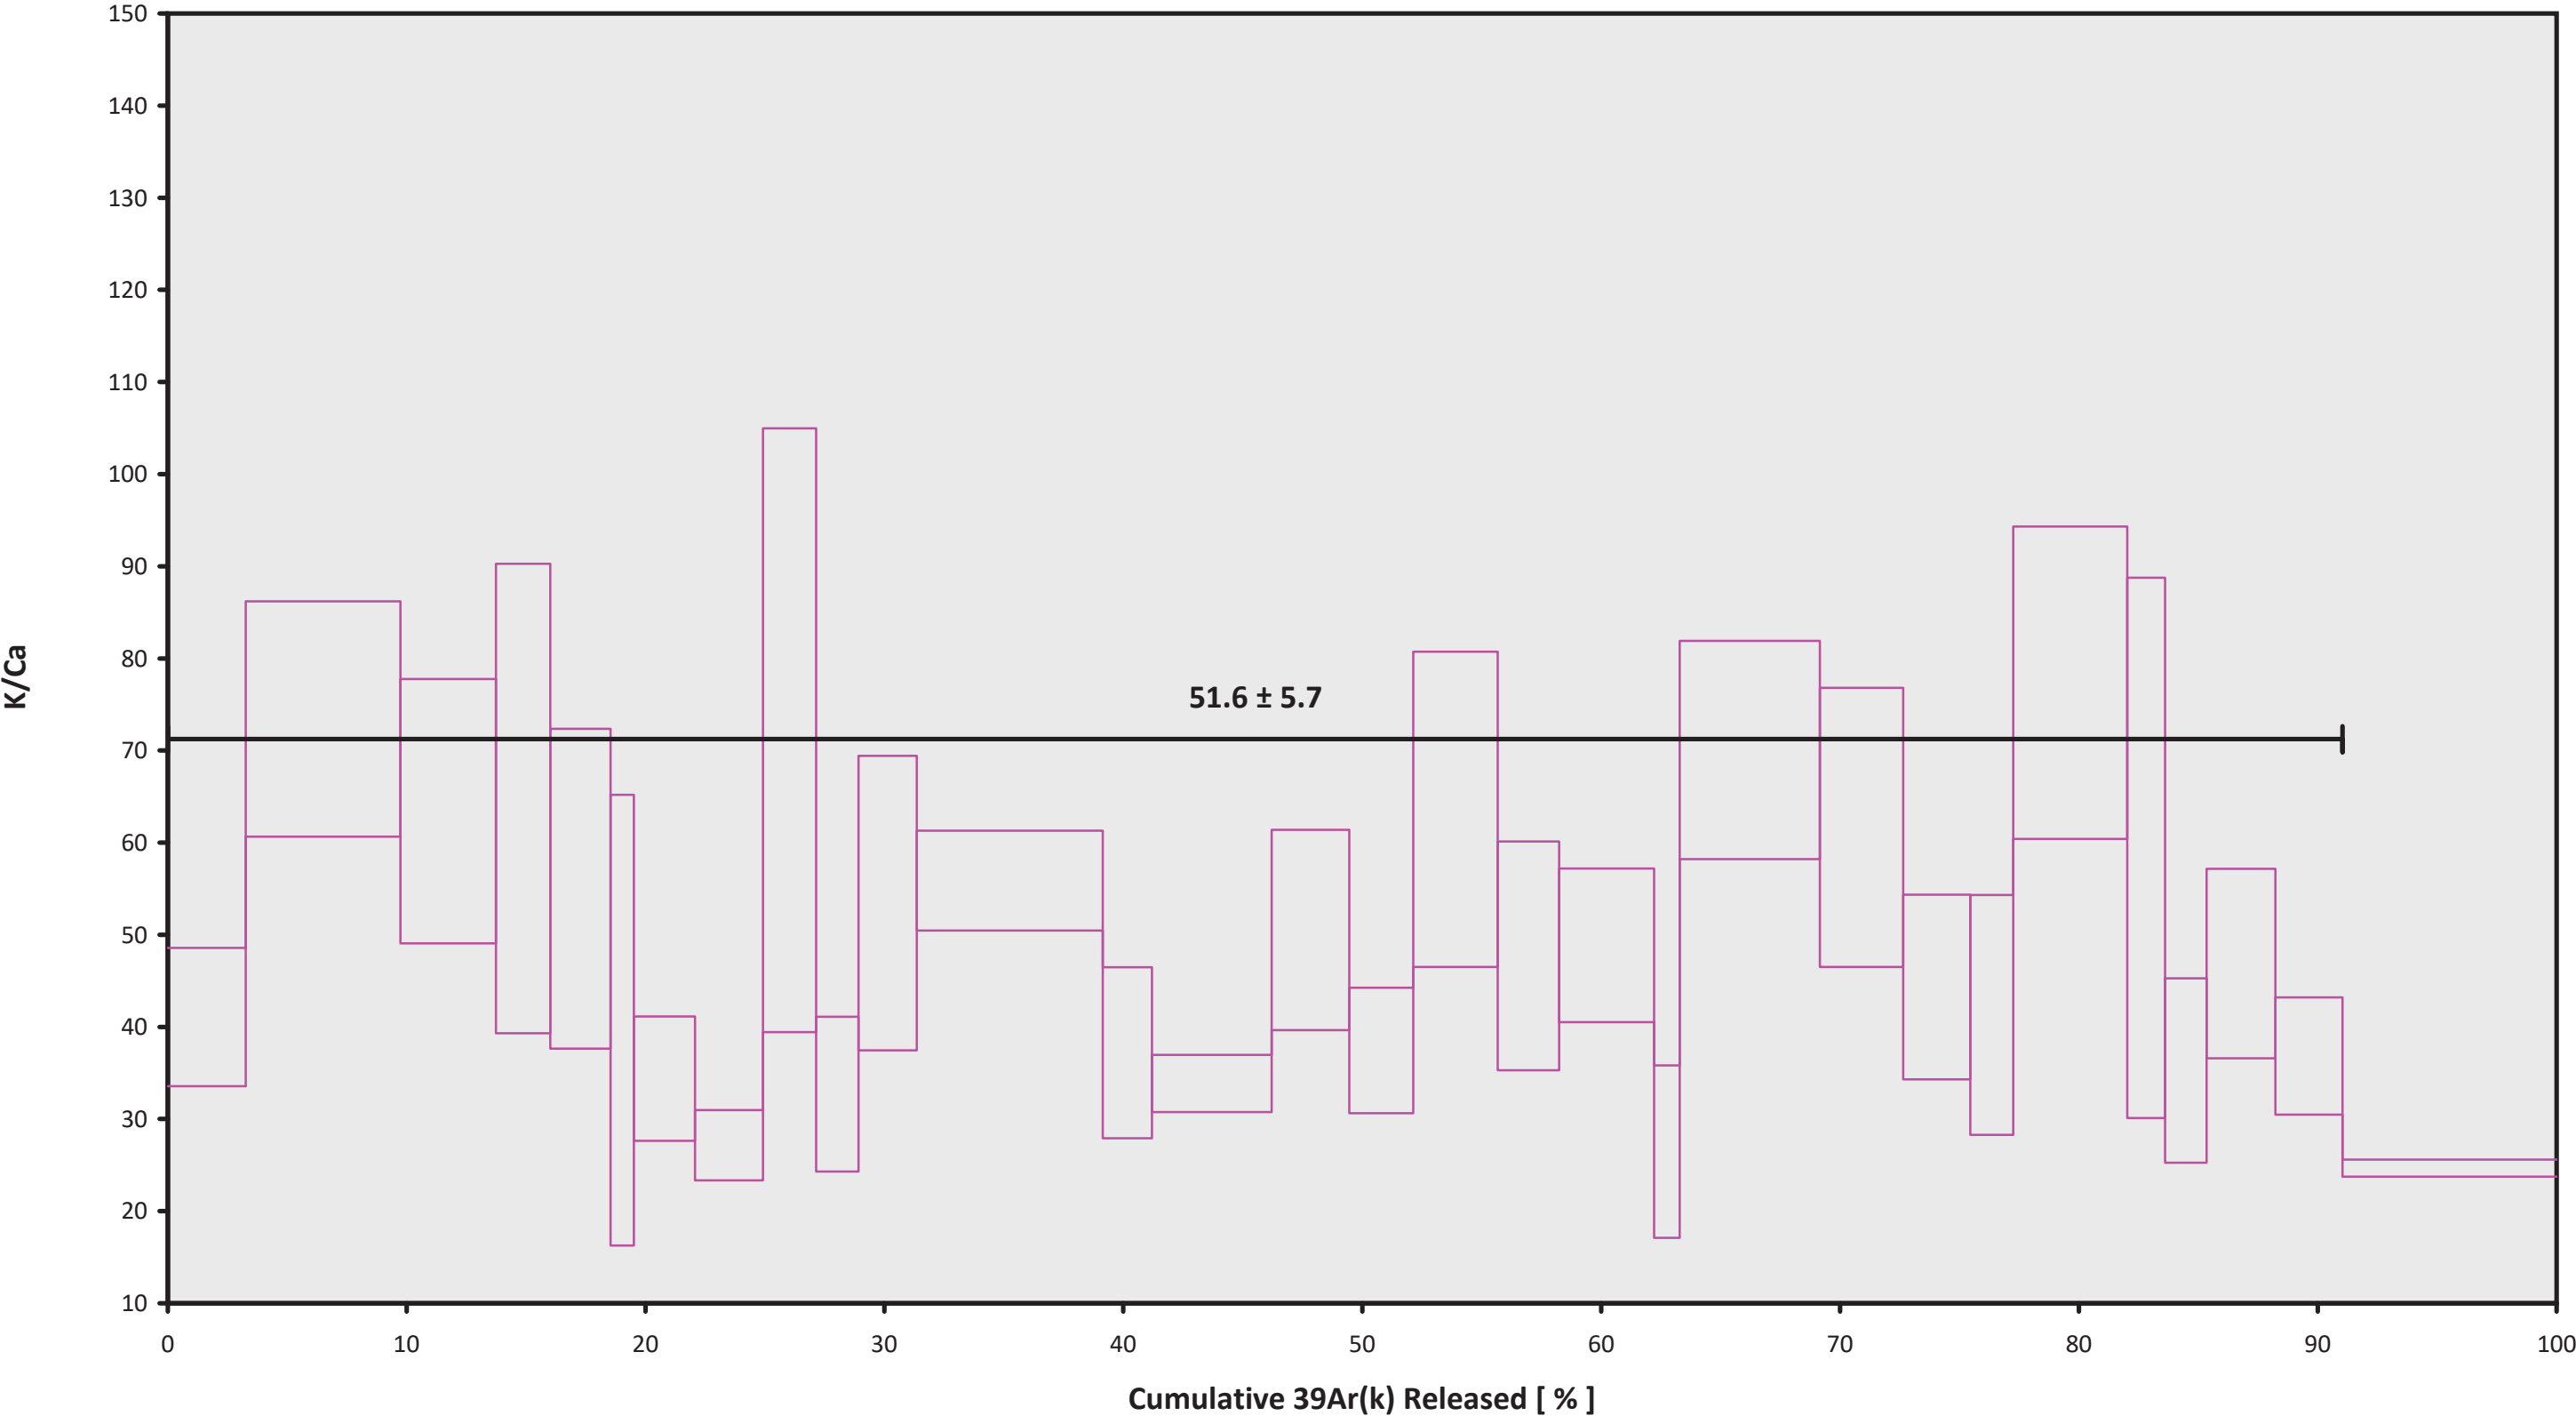

Ar-Ages in Ma

WEIGHTED PLATEAU

$10.54 \pm 0.02$

TOTAL FUSION

$11.49 \pm 0.03$

NORMAL ISOCHRON

$10.55 \pm 0.03$

INVERSE ISOCHRON

$10.55 \pm 0.03$

ASSUMED TRAPPED  $^{40}\text{Ar}/^{36}\text{Ar}$  RATIO

Standard  $^{40}/^{36} = 298.56 \pm 0.104$  %SD

Sample Info

Sanidine

Circle Bar

Dan Miggins

IRR = 21-OSU-04 (4X16-21)

J =  $0.00164505 \pm 0.00000184$

21F16635.AGE >>> VS19-089 >>> OREGON | SWENTON (20-01) PROJECT

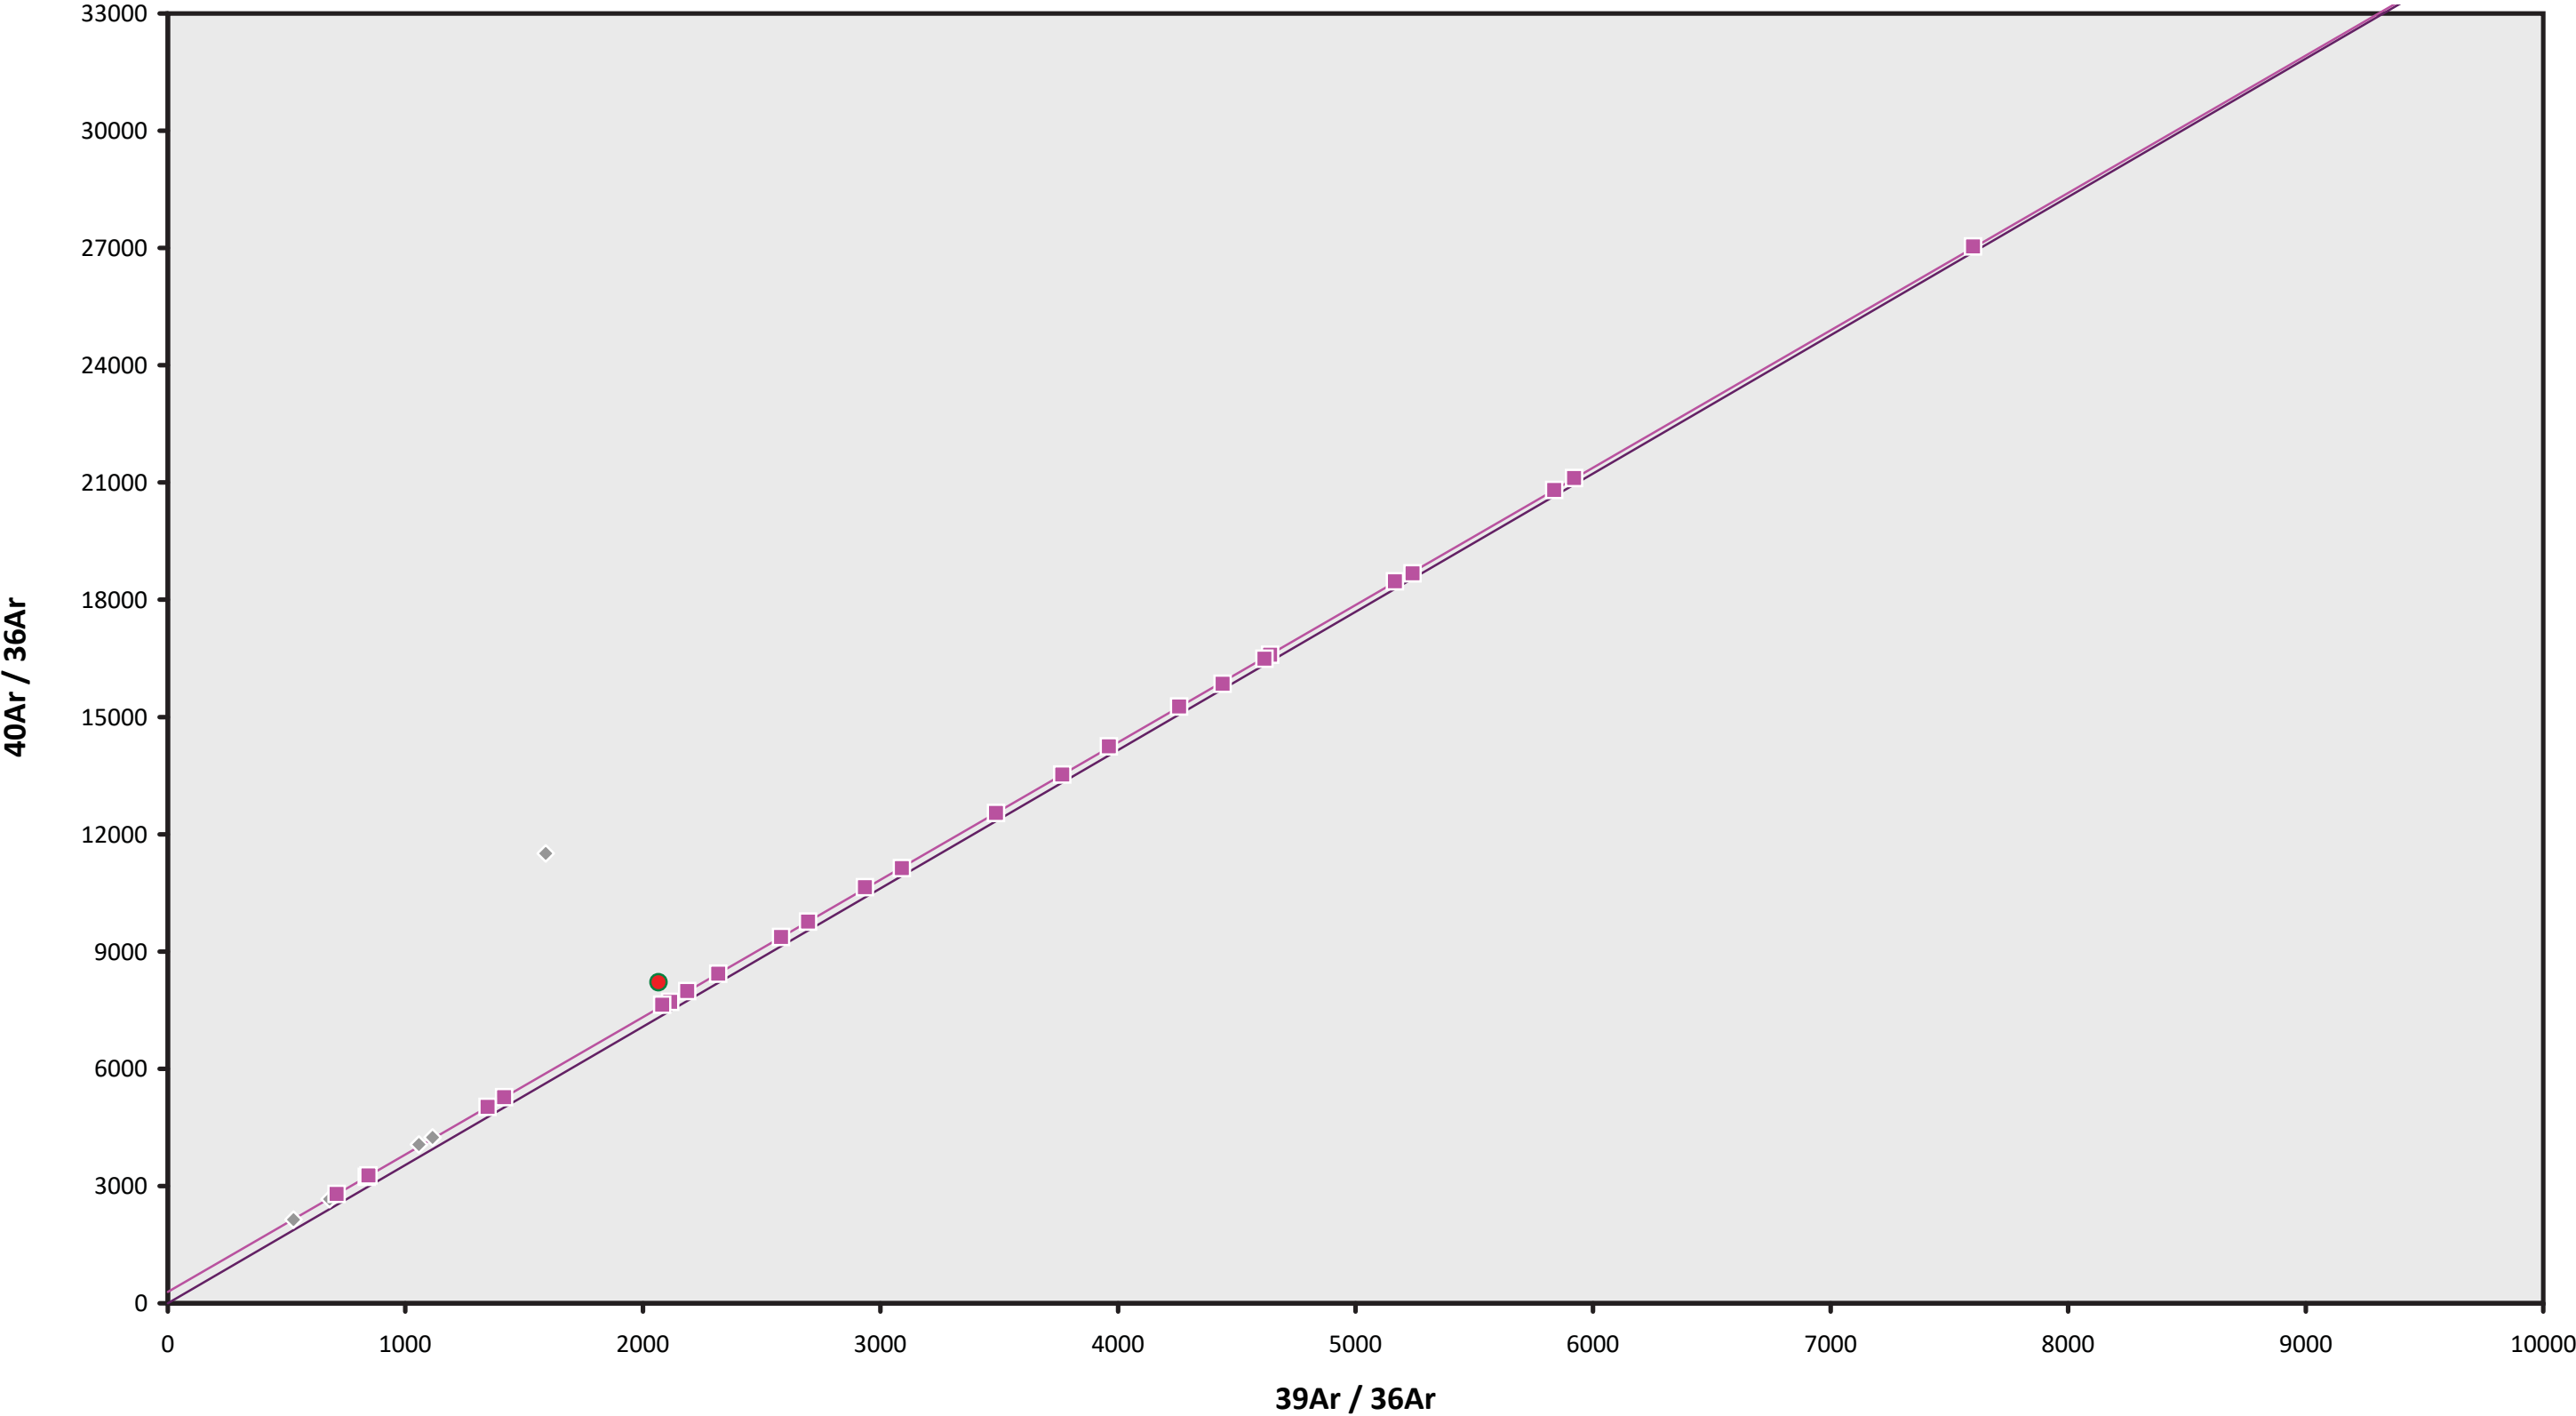

Ar-Ages in Ma

WEIGHTED PLATEAU

$10.54 \pm 0.02$

TOTAL FUSION

$11.49 \pm 0.03$

NORMAL ISOCHRON

$10.55 \pm 0.03$

INVERSE ISOCHRON

$10.55 \pm 0.03$

MSWD (PROBABILITY)

3.81 (0%)

CALCULATED  $^{40}\text{Ar}/^{36}\text{Ar}$  INTERCEPT

$290.1 \pm 8.1$

Sample Info

Sanidine

Circle Bar

Dan Miggins

IRR = 21-OSU-04 (4X16-21)

$J = 0.00164505 \pm 0.00000184$

21F16635.AGE >>> VS19-089 >>> OREGON | SWENTON (20-01) PROJECT

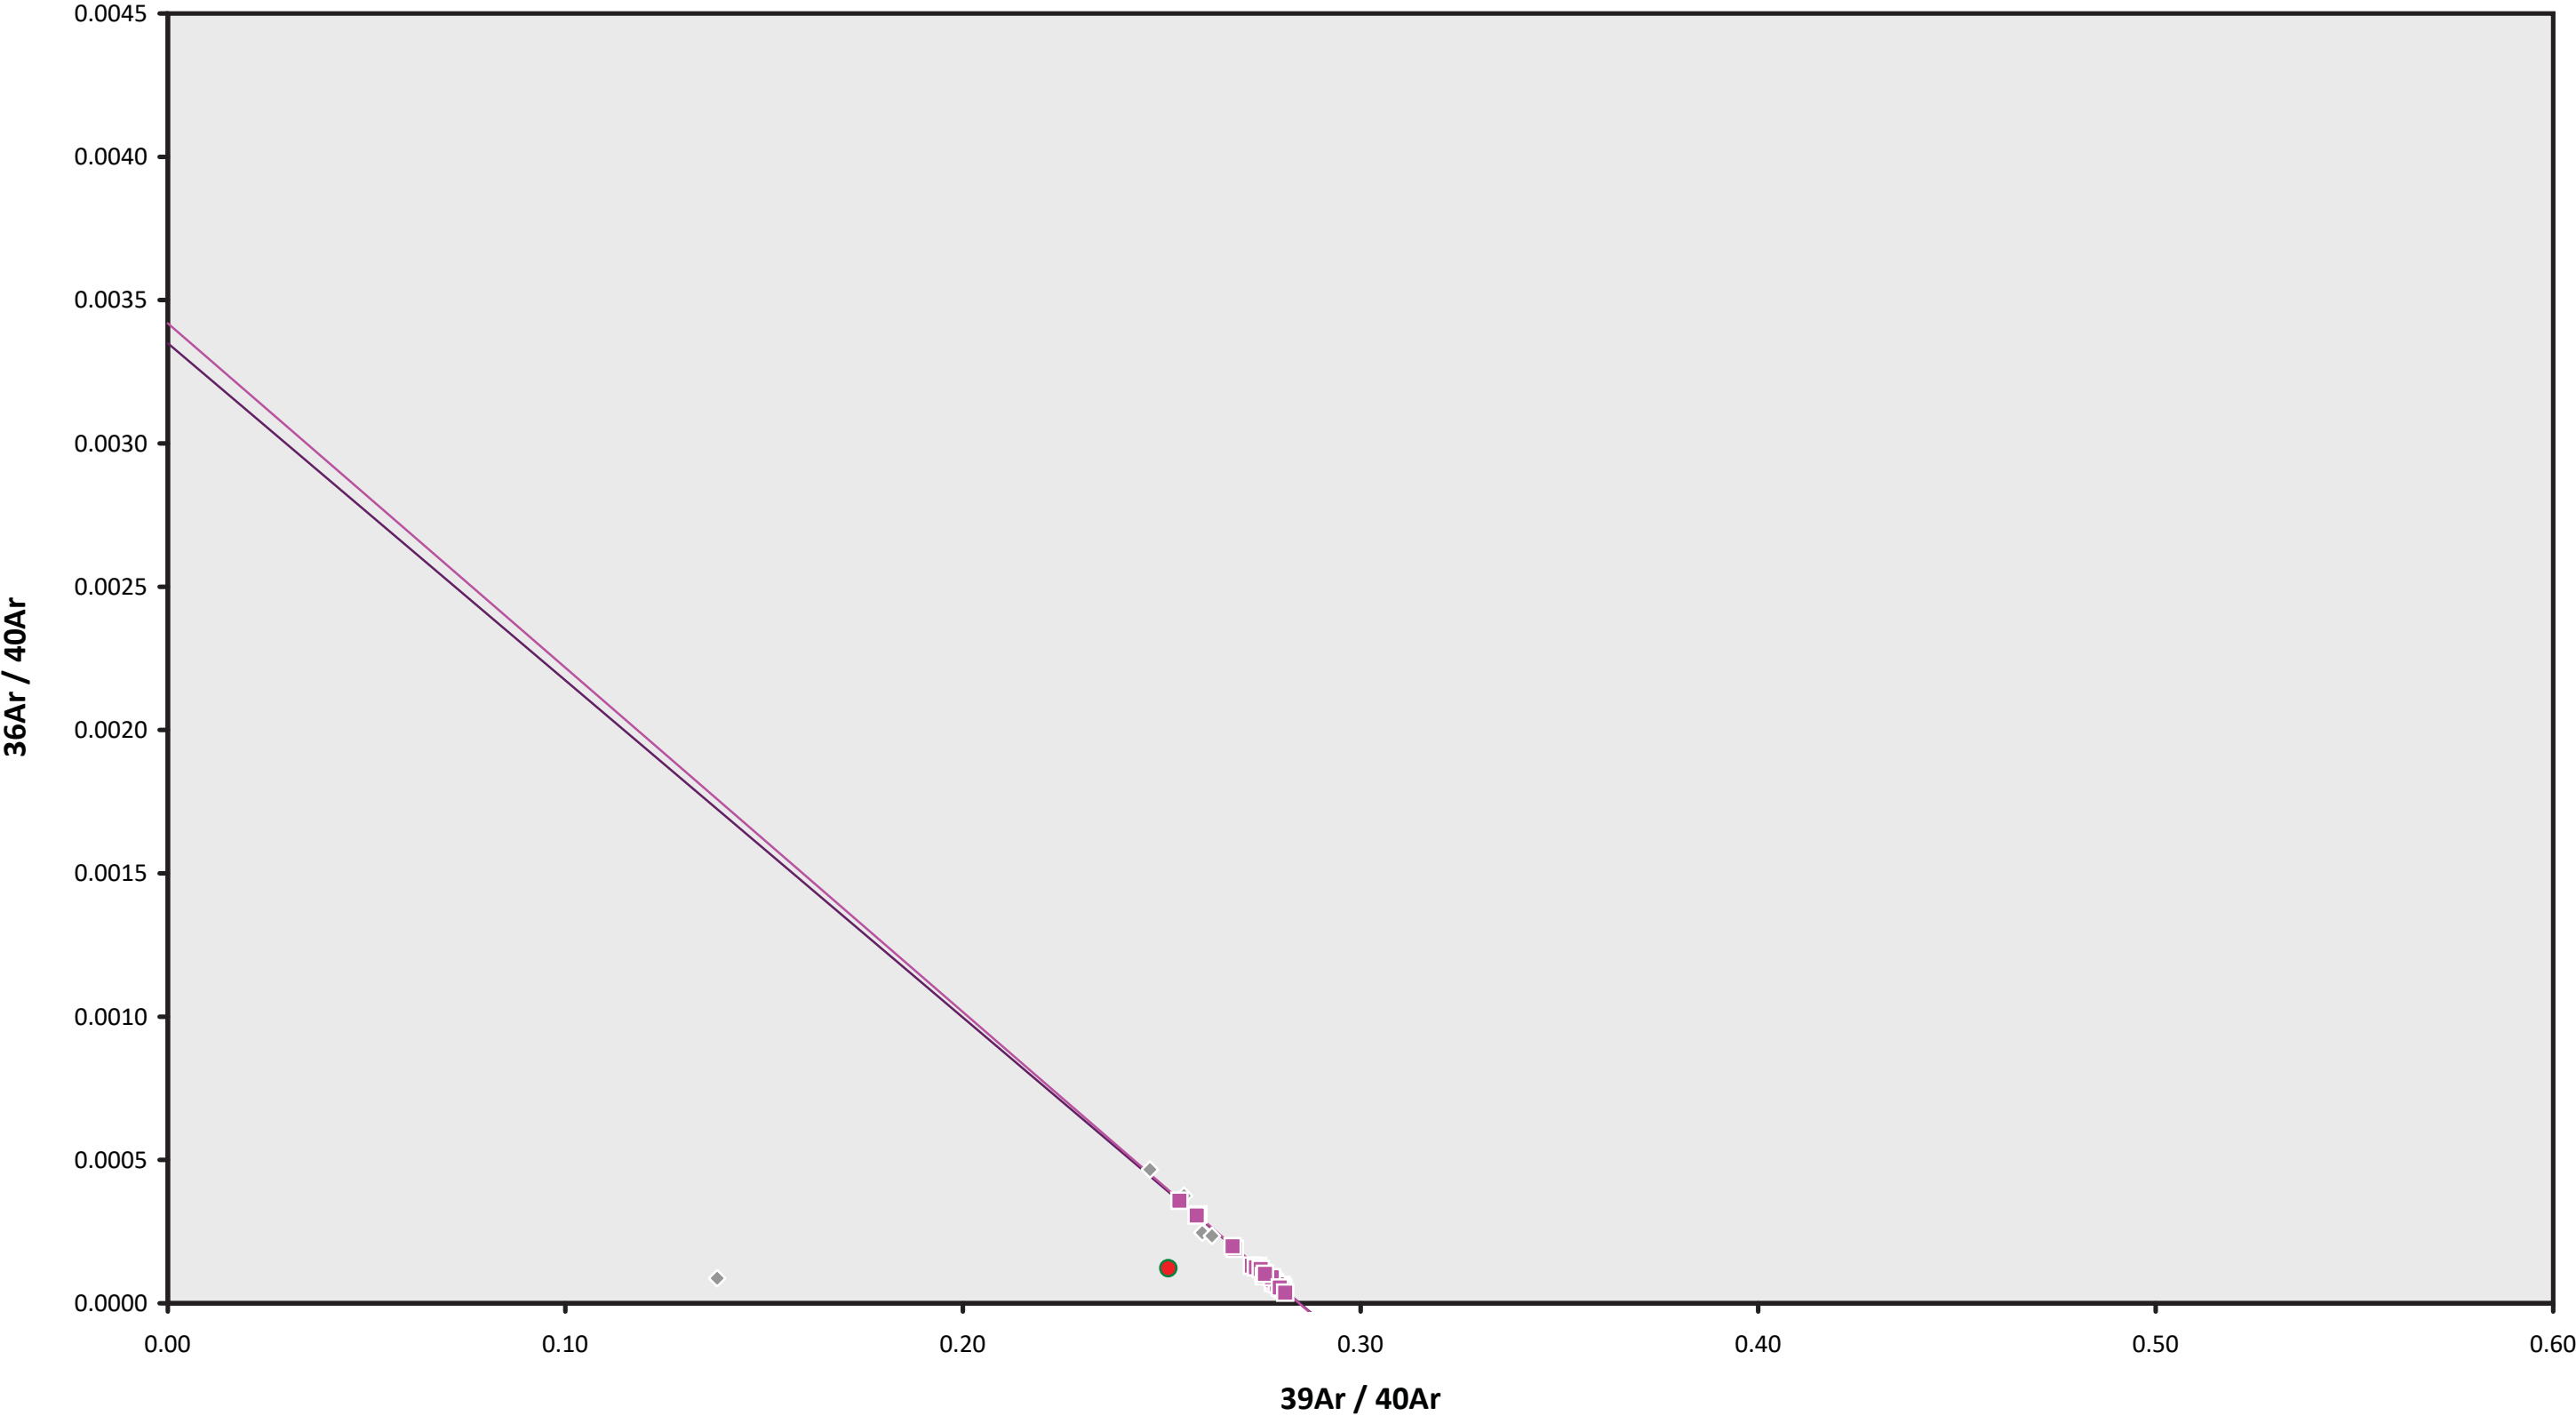

Ar-Ages in Ma

WEIGHTED PLATEAU

$10.54 \pm 0.02$

TOTAL FUSION

$11.49 \pm 0.03$

NORMAL ISOCHRON

$10.55 \pm 0.03$

INVERSE ISOCHRON

$10.55 \pm 0.03$

MSWD (PROBABILITY)

3.67 (0%)

SPREADING FACTOR

9.3%

CALCULATED  $^{40}\text{Ar}/^{36}\text{Ar}$  INTERCEPT

$292.5 \pm 8.0$

Sample Info

Sanidine

Circle Bar

Dan Miggins

IRR = 21-OSU-04 (4X16-21)

$J = 0.00164505 \pm 0.00000184$

| Relative Abundances |        |   | 36Ar<br>[fA] | %1σ   | 37Ar<br>[fA] | %1σ    | 38Ar<br>[fA] | %1σ   | 39Ar<br>[fA] | %1σ   | 40Ar<br>[fA] | %1σ   | 40(r)/39(k) ± 2σ  | Age ± 2σ<br>(Ma) | 40Ar(r)<br>(%) | 39Ar(k)<br>(%) | K/Ca ± 2σ |
|---------------------|--------|---|--------------|-------|--------------|--------|--------------|-------|--------------|-------|--------------|-------|-------------------|------------------|----------------|----------------|-----------|
| 21F15806            | 24.0 % | ✓ | 0.0283538    | 1.372 | 0.4117324    | 9.945  | 1.007813     | 1.035 | 84.0212      | 0.042 | 278.5864     | 0.012 | 3.21471 ± 0.00395 | 9.70 ± 0.01      | 96.95          | 6.09           | 88 ± 17   |
| 21F15808            | 24.0 % | ✓ | 0.0186562    | 2.024 | 0.3144997    | 12.075 | 0.632423     | 1.398 | 51.7802      | 0.046 | 172.0692     | 0.017 | 3.21540 ± 0.00539 | 9.71 ± 0.02      | 96.76          | 3.75           | 71 ± 17   |
| 21F15809            | 24.0 % | ✓ | 0.0621997    | 0.797 | 0.1283894    | 30.598 | 0.282090     | 3.272 | 21.9064      | 0.060 | 88.8564      | 0.028 | 3.20835 ± 0.01435 | 9.69 ± 0.04      | 79.10          | 1.59           | 73 ± 45   |
| 21F15811            | 24.0 % | ✓ | 0.0041022    | 8.345 | 0.2928270    | 12.758 | 0.661306     | 1.415 | 53.8502      | 0.044 | 174.6352     | 0.018 | 3.22009 ± 0.00489 | 9.72 ± 0.01      | 99.29          | 3.90           | 79 ± 20   |
| 21F15812            | 24.0 % | ✓ | 0.0131028    | 2.737 | 0.5814726    | 6.419  | 1.171769     | 0.766 | 94.0194      | 0.041 | 306.4802     | 0.011 | 3.21806 ± 0.00357 | 9.71 ± 0.01      | 98.72          | 6.81           | 70 ± 9    |
| 21F15814            | 24.0 % | ✓ | 0.0217964    | 1.702 | 0.3133892    | 12.243 | 0.797756     | 1.119 | 65.5118      | 0.043 | 216.8083     | 0.014 | 3.20991 ± 0.00446 | 9.69 ± 0.01      | 96.99          | 4.75           | 90 ± 22   |
| 21F15815            | 24.0 % | ✓ | 0.0128377    | 2.742 | 0.4058012    | 9.277  | 0.951978     | 0.938 | 78.0546      | 0.041 | 254.7370     | 0.013 | 3.21430 ± 0.00389 | 9.70 ± 0.01      | 98.49          | 5.66           | 83 ± 15   |
| 21F15817            | 24.0 % | ✓ | 0.0242457    | 1.659 | 0.4465677    | 8.511  | 0.858573     | 1.160 | 71.6648      | 0.042 | 238.1723     | 0.012 | 3.22232 ± 0.00440 | 9.73 ± 0.01      | 96.96          | 5.19           | 69 ± 12   |
| 21F15820            | 24.0 % | ✓ | 0.0219161    | 1.817 | 0.1951080    | 20.243 | 0.415380     | 2.183 | 35.4709      | 0.051 | 120.5813     | 0.023 | 3.21482 ± 0.00764 | 9.70 ± 0.02      | 94.57          | 2.57           | 78 ± 32   |
| 21F15821            | 24.0 % | ✓ | 0.0095521    | 3.862 | 0.2043341    | 18.960 | 0.448345     | 2.128 | 38.2610      | 0.051 | 126.4704     | 0.023 | 3.23076 ± 0.00679 | 9.75 ± 0.02      | 97.74          | 2.77           | 81 ± 31   |
| 21F15823            | 24.0 % |   | 0.1137762    | 0.498 | 0.3927751    | 9.119  | 0.360875     | 2.422 | 25.6883      | 0.059 | 128.5231     | 0.019 | 3.68153 ± 0.01426 | 11.11 ± 0.04     | 73.58          | 1.86           | 28 ± 5    |
| 21F15824            | 24.0 % | ✓ | 0.1391882    | 0.527 | 0.2731465    | 13.518 | 0.760738     | 1.198 | 58.3659      | 0.044 | 229.0119     | 0.012 | 3.21154 ± 0.00821 | 9.70 ± 0.02      | 81.85          | 4.23           | 92 ± 25   |
| 21F15826            | 24.0 % | ✓ | 0.0139833    | 2.755 | 0.1794876    | 19.280 | 0.387226     | 2.434 | 32.5007      | 0.050 | 108.5801     | 0.023 | 3.21225 ± 0.00795 | 9.70 ± 0.02      | 96.15          | 2.36           | 78 ± 30   |
| 21F15827            | 24.0 % | ✓ | 0.0157541    | 2.458 | 0.1644289    | 21.387 | 0.513899     | 1.830 | 41.6135      | 0.047 | 138.6752     | 0.017 | 3.21916 ± 0.00644 | 9.72 ± 0.02      | 96.60          | 3.02           | 109 ± 47  |
| 21F15829            | 24.0 % | ✓ | 0.4338434    | 0.280 | 0.2664684    | 12.367 | 0.840311     | 1.015 | 62.6308      | 0.044 | 330.6816     | 0.010 | 3.21148 ± 0.01270 | 9.69 ± 0.04      | 60.82          | 4.54           | 101 ± 25  |
| 21F15830            | 24.0 % | ✓ | 0.0975537    | 0.615 | 1.2572323    | 2.905  | 0.457452     | 1.988 | 37.7135      | 0.051 | 149.8224     | 0.019 | 3.20251 ± 0.01028 | 9.67 ± 0.03      | 80.61          | 2.73           | 13 ± 1    |
| 21F15832            | 24.0 % | ✓ | 0.5324388    | 0.263 | 0.5732327    | 6.517  | 1.052988     | 0.926 | 79.9099      | 0.042 | 417.9878     | 0.008 | 3.24142 ± 0.01160 | 9.79 ± 0.03      | 61.97          | 5.79           | 60 ± 8    |
| 21F15833            | 24.0 % | ✓ | 0.0195907    | 2.016 | 0.3470952    | 10.123 | 0.532266     | 1.822 | 43.7526      | 0.047 | 146.4765     | 0.018 | 3.21420 ± 0.00630 | 9.70 ± 0.02      | 96.01          | 3.17           | 54 ± 11   |
| 21F15835            | 24.0 % | ✓ | 0.0049834    | 6.366 | 0.2173907    | 16.946 | 0.227086     | 4.239 | 19.4173      | 0.064 | 63.5948      | 0.039 | 3.19885 ± 0.01088 | 9.66 ± 0.03      | 97.67          | 1.41           | 38 ± 13   |
| 21F15836            | 24.0 % | ✓ | 0.1384521    | 0.503 | 0.5851895    | 6.094  | 0.924342     | 1.005 | 73.5735      | 0.043 | 277.3759     | 0.013 | 3.20827 ± 0.00647 | 9.69 ± 0.02      | 85.10          | 5.33           | 54 ± 7    |
| 21F15838            | 24.0 % | ✓ | 0.0729518    | 0.796 | 0.2233734    | 16.111 | 0.420069     | 2.195 | 33.6438      | 0.051 | 129.7680     | 0.021 | 3.20968 ± 0.01101 | 9.69 ± 0.03      | 83.21          | 2.44           | 65 ± 21   |
| 21F15841            | 24.0 % | ✓ | 0.0452175    | 1.009 | 0.3305228    | 11.406 | 0.818456     | 1.098 | 68.0366      | 0.043 | 232.3866     | 0.012 | 3.21698 ± 0.00495 | 9.71 ± 0.01      | 94.18          | 4.93           | 89 ± 20   |
| 21F15842            | 24.0 % | ✓ | 0.0594727    | 0.802 | 0.1727858    | 20.606 | 0.581766     | 1.446 | 46.8182      | 0.047 | 168.2159     | 0.017 | 3.21340 ± 0.00695 | 9.70 ± 0.02      | 89.44          | 3.39           | 117 ± 48  |
| 21F15844            | 24.0 % | ✓ | 0.0961858    | 0.567 | 0.3333186    | 11.478 | 0.520628     | 1.840 | 42.4506      | 0.047 | 165.0518     | 0.017 | 3.21165 ± 0.00848 | 9.70 ± 0.03      | 82.60          | 3.08           | 55 ± 13   |
| 21F15845            | 24.0 % | ✓ | 0.3135992    | 0.356 | 0.2841589    | 13.087 | 0.511652     | 1.928 | 37.3164      | 0.049 | 212.0190     | 0.014 | 3.17265 ± 0.01894 | 9.58 ± 0.06      | 55.84          | 2.70           | 56 ± 15   |
| 21F15847            | 24.0 % | ✓ | 0.0575830    | 0.890 | 0.4511621    | 7.676  | 0.674232     | 1.457 | 54.8708      | 0.044 | 193.3096     | 0.014 | 3.20975 ± 0.00635 | 9.69 ± 0.02      | 91.11          | 3.98           | 52 ± 8    |
| 21F15848            | 24.0 % | ✓ | 0.0189390    | 2.093 | 0.2160970    | 16.619 | 0.330615     | 2.773 | 27.1562      | 0.055 | 92.9291      | 0.028 | 3.21386 ± 0.00961 | 9.70 ± 0.03      | 93.92          | 1.97           | 54 ± 18   |
| Σ                   |        |   | 2.3902756    | 0.132 | 9.5619868    | 2.010  | 17.142033    | 0.282 | 1379.9987    | 0.009 | 5161.8058    | 0.003 |                   |                  |                |                |           |

| Information on Analysis and Constants Used in Calculations |  |
|------------------------------------------------------------|--|
| Project = <b>SWENTON (20-01)</b>                           |  |
| Sample = <b>VS19-093</b>                                   |  |
| Material = <b>Sanidine</b>                                 |  |
| Location = <b>Unidentified flow #2</b>                     |  |
| Region = <b>Eastern Oregon</b>                             |  |
| Analyst = <b>Dan Miggins</b>                               |  |
| Irradiation = <b>21-OSU-04 (4X2-21)</b>                    |  |
| Position = <b>X: 0   Y: 0   Z/H: 1.277199 mm</b>           |  |
| FCT-NM Age = <b>28.201 ± 0.023 Ma</b>                      |  |
| FCT-NM Reference = <b>Kuiper et al (2008)</b>              |  |
| FCT-NM 40Ar/39Ar Ratio = <b>9.38912 ± 0.01061</b>          |  |
| FCT-NM J-value = <b>0.00165356 ± 0.00000187</b>            |  |
| Air Shot 40Ar/36Ar = <b>301.2520 ± 0.3374</b>              |  |
| Air Shot MDF = <b>0.99776310 ± 0.00037917 (LIN)</b>        |  |
| Experiment Type = <b>Total Fusion</b>                      |  |
| Extraction Method = <b>Single Crystal Laser Heating</b>    |  |
| Heating = <b>50 sec</b>                                    |  |
| Isolation = <b>1.50 min</b>                                |  |
| Instrument = <b>ARGUS-VI-F</b>                             |  |
| Preferred Age = <b>Ideogram Age</b>                        |  |
| Age Classification = <b>Eruption Age</b>                   |  |
| IGSN = <b>Undefined</b>                                    |  |
| Rock Class = <b>Undefined</b>                              |  |
| Lithology = <b>Undefined</b>                               |  |
| Lat-Lon = <b>Undefined - Undefined</b>                     |  |

Age Equations = **Min et al. (2000)**  
Negative Intensities = **Allowed**  
Collector Calibrations = **36Ar**  
Decay 40K = **5.463 ± 0.107 E-10 1/a**  
Decay 39Ar = **2.940 ± 0.016 E-07 1/h**  
Decay 37Ar = **8.230 ± 0.012 E-04 1/h**  
Decay 36Cl = **2.257 ± 0.015 E-06 1/a**  
Decay 40K(EC,β<sup>+</sup>) = **0.580 ± 0.014 E-10 1/a**  
Decay 40K(β<sup>-</sup>) = **4.884 ± 0.099 E-10 1/a**  
Atmospheric 40/36(a) = **298.56 ± 0.31**  
Atmospheric 38/36(a) = **0.1885 ± 0.0003**  
Production 39/37(ca) = **0.0006425 ± 0.0000059**  
Production 38/37(ca) = **0.0001800 ± 0.0000173**  
Production 36/37(ca) = **0.0002703 ± 0.0000005**  
Production 40/39(k) = **0.000607 ± 0.000059**  
Production 38/39(k) = **0.012077 ± 0.000011**  
Production 36/38(cl) = **262.80 ± 1.71**  
Scaling Ratio K/Ca = **0.430**  
Abundance Ratio 40K/K = **1.1700 ± 0.0100 E-04**  
Atomic Weight K = **39.0983 ± 0.0001 g**

| Results          | 40(a)/36(a) ± 2σ      | 40(r)/39(k) ± 2σ           | Age ± 2σ<br>(Ma)    | MSWD         | 39Ar(k)<br>(%,n)     | K/Ca ± 2σ |
|------------------|-----------------------|----------------------------|---------------------|--------------|----------------------|-----------|
| Age Plateau      |                       |                            |                     |              |                      |           |
| Error Mean       |                       | 3.21540 ± 0.00257 ± 0.08%  | 9.71 ± 0.02 ± 0.24% | 4.56 0%      | 98.14 26             | 72 ± 9    |
|                  |                       | Full External Error ± 0.50 |                     | 1.57         | 2σ Confidence Limit  |           |
|                  |                       | Analytical Error ± 0.01    |                     | 2.1345       | Error Magnification  |           |
| Total Fusion Age |                       | 3.22328 ± 0.00155 ± 0.05%  | 9.73 ± 0.02 ± 0.23% |              | 27                   | 62 ± 2    |
|                  |                       | Full External Error ± 0.51 |                     |              |                      |           |
|                  |                       | Analytical Error ± 0.00    |                     |              |                      |           |
| Normal Isochron  |                       |                            |                     |              |                      |           |
| Error Chron      | 296.34 ± 2.38 ± 0.80% | 3.21925 ± 0.00339 ± 0.11%  | 9.72 ± 0.02 ± 0.25% | 5.97 0%      | 98.14 26             |           |
|                  |                       | Full External Error ± 0.51 |                     | 1.58         | 2σ Confidence Limit  |           |
|                  |                       | Analytical Error ± 0.01    |                     | 2.4429       | Error Magnification  |           |
|                  |                       |                            |                     | 1            | Number of Iterations |           |
|                  |                       |                            |                     | 0.0000020168 | Convergence          |           |
| Inverse Isochron |                       |                            |                     |              |                      |           |
| Error Chron      | 297.68 ± 2.14 ± 0.72% | 3.21607 ± 0.00310 ± 0.10%  | 9.71 ± 0.02 ± 0.25% | 4.83 0%      | 98.14 26             |           |
|                  |                       | Full External Error ± 0.50 |                     | 1.58         | 2σ Confidence Limit  |           |
|                  |                       | Analytical Error ± 0.01    |                     | 2.1971       | Error Magnification  |           |
|                  |                       |                            |                     | 2            | Number of Iterations |           |
|                  |                       |                            |                     | 0.0006653000 | Convergence          |           |
|                  |                       |                            |                     | 43%          | Spreading Factor     |           |

| Incremental Heating |        |   | 36Ar(a)<br>[fA] | 37Ar(ca)<br>[fA] | 38Ar(cl)<br>[fA] | 39Ar(k)<br>[fA] | 40Ar(r)<br>[fA] | Age ± 2σ<br>(Ma) | 40Ar(r)<br>(%) | 39Ar(k)<br>(%) | K/Ca ± 2σ |
|---------------------|--------|---|-----------------|------------------|------------------|-----------------|-----------------|------------------|----------------|----------------|-----------|
| 21F15806            | 24.0 % | ✓ | 0.0282425       | 0.4117324        | 0.0000000        | 84.0209         | 270.1034        | 9.70 ± 0.01      | 96.95          | 6.09           | 88 ± 17   |
| 21F15808            | 24.0 % | ✓ | 0.0185708       | 0.3144997        | 0.0035190        | 51.7800         | 166.4933        | 9.71 ± 0.02      | 96.76          | 3.75           | 71 ± 17   |
| 21F15809            | 24.0 % | ✓ | 0.0621643       | 0.1283894        | 0.0057856        | 21.9064         | 70.2833         | 9.69 ± 0.04      | 79.10          | 1.59           | 73 ± 45   |
| 21F15811            | 24.0 % | ✓ | 0.0040219       | 0.2928270        | 0.0101493        | 53.8500         | 173.4018        | 9.72 ± 0.01      | 99.29          | 3.90           | 79 ± 20   |
| 21F15812            | 24.0 % | ✓ | 0.0129417       | 0.5814726        | 0.0337565        | 94.0190         | 302.5592        | 9.71 ± 0.01      | 98.72          | 6.81           | 70 ± 9    |
| 21F15814            | 24.0 % | ✓ | 0.0217114       | 0.3133892        | 0.0024236        | 65.5116         | 210.2864        | 9.69 ± 0.01      | 96.99          | 4.75           | 90 ± 22   |
| 21F15815            | 24.0 % | ✓ | 0.0127272       | 0.4058012        | 0.0068443        | 78.0543         | 250.8897        | 9.70 ± 0.01      | 98.49          | 5.66           | 83 ± 15   |
| 21F15817            | 24.0 % | ✓ | 0.0241249       | 0.4465677        | 0.0000000        | 71.6645         | 230.9260        | 9.73 ± 0.01      | 96.96          | 5.19           | 69 ± 12   |
| 21F15820            | 24.0 % | ✓ | 0.0218633       | 0.1951080        | 0.0000000        | 35.4708         | 114.0323        | 9.70 ± 0.02      | 94.57          | 2.57           | 78 ± 32   |
| 21F15821            | 24.0 % | ✓ | 0.0094969       | 0.2043341        | 0.0000000        | 38.2609         | 123.6118        | 9.75 ± 0.02      | 97.74          | 2.77           | 81 ± 31   |
| 21F15823            | 24.0 % |   | 0.1136666       | 0.3927751        | 0.0291436        | 25.6880         | 94.5712         | 11.11 ± 0.04     | 73.58          | 1.86           | 28 ± 5    |
| 21F15824            | 24.0 % | ✓ | 0.1391109       | 0.2731465        | 0.0295837        | 58.3657         | 187.4435        | 9.70 ± 0.02      | 81.85          | 4.23           | 92 ± 25   |
| 21F15826            | 24.0 % | ✓ | 0.0139348       | 0.1794876        | 0.0000000        | 32.5006         | 104.4000        | 9.70 ± 0.02      | 96.15          | 2.36           | 78 ± 30   |
| 21F15827            | 24.0 % | ✓ | 0.0157087       | 0.1644289        | 0.0083435        | 41.6133         | 133.9600        | 9.72 ± 0.02      | 96.60          | 3.02           | 109 ± 47  |
| 21F15829            | 24.0 % | ✓ | 0.4337712       | 0.2664684        | 0.0021071        | 62.6306         | 201.1369        | 9.69 ± 0.04      | 60.82          | 4.54           | 101 ± 25  |
| 21F15830            | 24.0 % | ✓ | 0.0972139       | 1.2572323        | 0.0000000        | 37.7127         | 120.7754        | 9.67 ± 0.03      | 80.61          | 2.73           | 13 ± 1    |
| 21F15832            | 24.0 % | ✓ | 0.5322839       | 0.5732327        | 0.0000000        | 79.9095         | 259.0206        | 9.79 ± 0.03      | 61.97          | 5.79           | 60 ± 8    |
| 21F15833            | 24.0 % | ✓ | 0.0194969       | 0.3470952        | 0.0001312        | 43.7524         | 140.6289        | 9.70 ± 0.02      | 96.01          | 3.17           | 54 ± 11   |
| 21F15835            | 24.0 % | ✓ | 0.0049247       | 0.2173907        | 0.0000000        | 19.4172         | 62.1127         | 9.66 ± 0.03      | 97.67          | 1.41           | 38 ± 13   |
| 21F15836            | 24.0 % | ✓ | 0.1382928       | 0.5851895        | 0.0096264        | 73.5731         | 236.0425        | 9.69 ± 0.02      | 85.10          | 5.33           | 54 ± 7    |
| 21F15838            | 24.0 % | ✓ | 0.0728914       | 0.2233734        | 0.0000000        | 33.6436         | 107.9852        | 9.69 ± 0.03      | 83.21          | 2.44           | 65 ± 21   |
| 21F15841            | 24.0 % | ✓ | 0.0451281       | 0.3305228        | 0.0000000        | 68.0364         | 218.8718        | 9.71 ± 0.01      | 94.18          | 4.93           | 89 ± 20   |
| 21F15842            | 24.0 % | ✓ | 0.0594254       | 0.1727858        | 0.0051117        | 46.8181         | 150.4454        | 9.70 ± 0.02      | 89.44          | 3.39           | 117 ± 48  |
| 21F15844            | 24.0 % | ✓ | 0.0960957       | 0.3333186        | 0.0000000        | 42.4504         | 136.3357        | 9.70 ± 0.03      | 82.60          | 3.08           | 55 ± 13   |
| 21F15845            | 24.0 % | ✓ | 0.3135221       | 0.2841589        | 0.0018338        | 37.3162         | 118.3911        | 9.58 ± 0.06      | 55.84          | 2.70           | 56 ± 15   |
| 21F15847            | 24.0 % | ✓ | 0.0574609       | 0.4511621        | 0.0006480        | 54.8705         | 176.1207        | 9.69 ± 0.02      | 91.11          | 3.98           | 52 ± 8    |
| 21F15848            | 24.0 % | ✓ | 0.0188806       | 0.2160970        | 0.0000000        | 27.1560         | 87.2756         | 9.70 ± 0.03      | 93.92          | 1.97           | 54 ± 18   |
| Σ                   |        |   | 2.3876735       | 9.5619868        | 0.1490073        | 1379.9926       | 4448.1044       |                  |                |                |           |

| Information on Analysis                                                                                                                                                                                                                                                                                                      | Results          | 40(r)/39(k) ± 2σ          | Age ± 2σ (Ma)              | MSWD   | 39Ar(k) (% <i>n</i> ) | K/Ca ± 2σ |
|------------------------------------------------------------------------------------------------------------------------------------------------------------------------------------------------------------------------------------------------------------------------------------------------------------------------------|------------------|---------------------------|----------------------------|--------|-----------------------|-----------|
| Project = <b>SWENTON (20-01)</b><br>Sample = <b>VS19-093</b><br>Material = <b>Sanidine</b><br>Location = <b>Unidentified flow #2</b><br>Region = <b>Eastern Oregon</b><br>Analyst = <b>Dan Miggins</b><br>Irradiation = <b>21-OSU-04 (4X2-21)</b><br>J = <b>0.00165356 ± 0.00000187</b><br>FCT-NM = <b>28.201 ± 0.023 Ma</b> | Age Plateau      | 3.21540 ± 0.00257         | <b>9.71 ± 0.02</b>         | 4.56   | 98.14                 | 72 ± 9    |
|                                                                                                                                                                                                                                                                                                                              | Error Mean       | ± 0.08%                   | <b>± 0.24%</b>             | 0%     | 26                    |           |
|                                                                                                                                                                                                                                                                                                                              |                  |                           | Full External Error ± 0.50 | 1.57   | 2σ Confidence Limit   |           |
|                                                                                                                                                                                                                                                                                                                              |                  |                           | Analytical Error ± 0.01    | 2.1345 | Error Magnification   |           |
|                                                                                                                                                                                                                                                                                                                              | Total Fusion Age | 3.22328 ± 0.00155 ± 0.05% | <b>9.73 ± 0.02 ± 0.23%</b> |        | 27                    | 62 ± 2    |
|                                                                                                                                                                                                                                                                                                                              |                  |                           | Full External Error ± 0.51 |        |                       |           |
|                                                                                                                                                                                                                                                                                                                              |                  |                           | Analytical Error ± 0.00    |        |                       |           |

| Normal Isochron |        |   | 39(k)/36(a) ± 2σ   | 40(a+r)/36(a) ± 2σ | r.i.   |
|-----------------|--------|---|--------------------|--------------------|--------|
| 21F15806        | 24.0 % | ✓ | 2974.99 ± 82.05    | 9862.29 ± 271.90   | 0.9995 |
| 21F15808        | 24.0 % | ✓ | 2788.25 ± 113.48   | 9263.88 ± 376.95   | 0.9997 |
| 21F15809        | 24.0 % | ✓ | 352.39 ± 5.64      | 1429.17 ± 22.82    | 0.9965 |
| 21F15811        | 24.0 % | ✓ | 13389.26 ± 2280.42 | 43413.16 ± 7393.93 | 1.0000 |
| 21F15812        | 24.0 % | ✓ | 7264.81 ± 402.88   | 23677.17 ± 1312.92 | 0.9999 |
| 21F15814        | 24.0 % | ✓ | 3017.39 ± 103.18   | 9984.11 ± 341.33   | 0.9997 |
| 21F15815        | 24.0 % | ✓ | 6132.87 ± 339.41   | 20011.43 ± 1107.37 | 0.9999 |
| 21F15817        | 24.0 % | ✓ | 2970.56 ± 99.12    | 9870.64 ± 329.27   | 0.9997 |
| 21F15820        | 24.0 % | ✓ | 1622.39 ± 59.16    | 5514.25 ± 201.01   | 0.9995 |
| 21F15821        | 24.0 % | ✓ | 4028.77 ± 313.15   | 13314.56 ± 1034.84 | 0.9999 |
| 21F15823        | 24.0 % |   | 225.99 ± 2.27      | 1130.56 ± 11.28    | 0.9924 |
| 21F15824        | 24.0 % | ✓ | 419.56 ± 4.44      | 1646.00 ± 17.38    | 0.9963 |
| 21F15826        | 24.0 % | ✓ | 2332.34 ± 129.00   | 7790.62 ± 430.84   | 0.9998 |
| 21F15827        | 24.0 % | ✓ | 2649.06 ± 130.69   | 8826.31 ± 435.37   | 0.9998 |
| 21F15829        | 24.0 % | ✓ | 144.39 ± 0.82      | 762.25 ± 4.27      | 0.9873 |
| 21F15830        | 24.0 % | ✓ | 387.94 ± 4.80      | 1540.93 ± 19.02    | 0.9961 |
| 21F15832        | 24.0 % | ✓ | 150.13 ± 0.80      | 785.18 ± 4.13      | 0.9870 |
| 21F15833        | 24.0 % | ✓ | 2244.07 ± 90.97    | 7511.44 ± 304.42   | 0.9997 |
| 21F15835        | 24.0 % | ✓ | 3942.83 ± 508.26   | 12911.11 ± 1664.28 | 0.9999 |
| 21F15836        | 24.0 % | ✓ | 532.01 ± 5.38      | 2005.39 ± 20.22    | 0.9961 |
| 21F15838        | 24.0 % | ✓ | 461.56 ± 7.37      | 1780.01 ± 28.38    | 0.9976 |
| 21F15841        | 24.0 % | ✓ | 1507.63 ± 30.51    | 5148.57 ± 104.09   | 0.9990 |
| 21F15842        | 24.0 % | ✓ | 787.85 ± 12.67     | 2830.23 ± 45.45    | 0.9981 |
| 21F15844        | 24.0 % | ✓ | 441.75 ± 5.03      | 1717.31 ± 19.51    | 0.9961 |
| 21F15845        | 24.0 % | ✓ | 119.02 ± 0.86      | 676.18 ± 4.82      | 0.9898 |
| 21F15847        | 24.0 % | ✓ | 954.92 ± 17.05     | 3363.61 ± 59.99    | 0.9987 |
| 21F15848        | 24.0 % | ✓ | 1438.30 ± 60.43    | 4921.06 ± 206.71   | 0.9996 |

| Results         | 40(a)/36(a) ± 2σ      | 40(r)/39(k) ± 2σ  | Age ± 2σ (Ma)              | MSWD            |
|-----------------|-----------------------|-------------------|----------------------------|-----------------|
| Normal Isochron | 296.34 ± 2.38         | 3.21925 ± 0.00339 | 9.72 ± 0.02                | 5.97            |
| Error Chron     | ± 0.80%               | ± 0.11%           | ± 0.25%                    | 0%              |
|                 |                       |                   | Full External Error ± 0.51 |                 |
|                 |                       |                   | Analytical Error ± 0.01    |                 |
| Statistics      | 2σ Confidence Limit   | 1.58              | Convergence                | 0.000002016767  |
|                 | Error Magnification   | 2.4429            | Number of Iterations       | 1               |
|                 | Number of Data Points | 26                | Calculated Line            | Weighted York-2 |



| Inverse Isochron |        |   | 39(k)/40(a+r) ± 2σ    | 36(a)/40(a+r) ± 2σ      | r.i.   |
|------------------|--------|---|-----------------------|-------------------------|--------|
| 21F15806         | 24.0 % | ✓ | 0.3016526 ± 0.0002631 | 0.00010140 ± 0.00000280 | 0.0024 |
| 21F15808         | 24.0 % | ✓ | 0.3009805 ± 0.0002956 | 0.00010795 ± 0.00000439 | 0.0030 |
| 21F15809         | 24.0 % | ✓ | 0.2465735 ± 0.0003281 | 0.00069971 ± 0.00001117 | 0.0151 |
| 21F15811         | 24.0 % | ✓ | 0.3084147 ± 0.0002942 | 0.00002303 ± 0.00000392 | 0.0008 |
| 21F15812         | 24.0 % | ✓ | 0.3068275 ± 0.0002613 | 0.00004223 ± 0.00000234 | 0.0011 |
| 21F15814         | 24.0 % | ✓ | 0.3022189 ± 0.0002727 | 0.00010016 ± 0.00000342 | 0.0025 |
| 21F15815         | 24.0 % | ✓ | 0.3064683 ± 0.0002666 | 0.00004997 ± 0.00000277 | 0.0014 |
| 21F15817         | 24.0 % | ✓ | 0.3009485 ± 0.0002646 | 0.00010131 ± 0.00000338 | 0.0022 |
| 21F15820         | 24.0 % | ✓ | 0.2942177 ± 0.0003289 | 0.00018135 ± 0.00000661 | 0.0051 |
| 21F15821         | 24.0 % | ✓ | 0.3025837 ± 0.0003359 | 0.00007511 ± 0.00000584 | 0.0024 |
| 21F15823         | 24.0 % |   | 0.1998953 ± 0.0002475 | 0.00088451 ± 0.00000882 | 0.0121 |
| 21F15824         | 24.0 % | ✓ | 0.2548982 ± 0.0002323 | 0.00060753 ± 0.00000641 | 0.0063 |
| 21F15826         | 24.0 % | ✓ | 0.2993778 ± 0.0003329 | 0.00012836 ± 0.00000710 | 0.0036 |
| 21F15827         | 24.0 % | ✓ | 0.3001324 ± 0.0003019 | 0.00011330 ± 0.00000559 | 0.0025 |
| 21F15829         | 24.0 % | ✓ | 0.1894203 ± 0.0001702 | 0.00131190 ± 0.00000734 | 0.0080 |
| 21F15830         | 24.0 % | ✓ | 0.2517543 ± 0.0002742 | 0.00064896 ± 0.00000801 | 0.0107 |
| 21F15832         | 24.0 % | ✓ | 0.1911989 ± 0.0001636 | 0.00127359 ± 0.00000670 | 0.0061 |
| 21F15833         | 24.0 % | ✓ | 0.2987530 ± 0.0003006 | 0.00013313 ± 0.00000540 | 0.0033 |
| 21F15835         | 24.0 % | ✓ | 0.3053831 ± 0.0004558 | 0.00007745 ± 0.00000998 | 0.0032 |
| 21F15836         | 24.0 % | ✓ | 0.2652896 ± 0.0002373 | 0.00049866 ± 0.00000503 | 0.0071 |
| 21F15838         | 24.0 % | ✓ | 0.2593004 ± 0.0002847 | 0.00056179 ± 0.00000896 | 0.0098 |
| 21F15841         | 24.0 % | ✓ | 0.2928246 ± 0.0002611 | 0.00019423 ± 0.00000393 | 0.0034 |
| 21F15842         | 24.0 % | ✓ | 0.2783684 ± 0.0002787 | 0.00035333 ± 0.00000567 | 0.0075 |
| 21F15844         | 24.0 % | ✓ | 0.2572344 ± 0.0002601 | 0.00058231 ± 0.00000661 | 0.0106 |
| 21F15845         | 24.0 % | ✓ | 0.1760229 ± 0.0001800 | 0.00147890 ± 0.00001054 | 0.0107 |
| 21F15847         | 24.0 % | ✓ | 0.2838968 ± 0.0002603 | 0.00029730 ± 0.00000530 | 0.0051 |
| 21F15848         | 24.0 % | ✓ | 0.2922748 ± 0.0003601 | 0.00020321 ± 0.00000854 | 0.0061 |

| Results          | 40(a)/36(a) ± 2σ      | 40(r)/39(k) ± 2σ           | Age ± 2σ (Ma)        | MSWD            |
|------------------|-----------------------|----------------------------|----------------------|-----------------|
| Inverse Isochron | 297.68 ± 2.14         | 3.21607 ± 0.00310          | 9.71 ± 0.02          | 4.83            |
| Error Chron      | ± 0.72%               | ± 0.10%                    | ± 0.25%              | 0%              |
|                  |                       | Full External Error ± 0.50 |                      |                 |
|                  |                       | Analytical Error ± 0.01    |                      |                 |
| Statistics       | 2σ Confidence Limit   | 1.58                       | Convergence          | 0.0006653000    |
|                  | Error Magnification   | 2.1971                     | Number of Iterations | 2               |
|                  | Number of Data Points | 26                         | Calculated Line      | Weighted York-2 |
|                  | Spreading Factor      | 42.6%                      |                      |                 |

| Degassing Patterns |        |   | 36Ar(a)<br>[fA] | %1σ  | 36Ar(c)<br>[fA] | %1σ  | 36Ar(ca)<br>[fA] | %1σ   | 36Ar(cl)<br>[fA] | %1σ    | 37Ar(ca)<br>[fA] | %1σ   | 38Ar(a)<br>[fA] | %1σ  | 38Ar(c)<br>[fA] | %1σ  | 38Ar(k)<br>[fA] | %1σ  | 38Ar(ca)<br>[fA] | %1σ   | 38Ar(cl)<br>[fA] | %1σ    | 39Ar(k)<br>[fA] | %1σ  | 39Ar(ca)<br>[fA] | %1σ   | 40Ar(r)<br>[fA] | %1σ  | 40Ar(a)<br>[fA] | %1σ  | 40Ar(c)<br>[fA] | %1σ  | 40Ar(k)<br>[fA] | %1σ  |
|--------------------|--------|---|-----------------|------|-----------------|------|------------------|-------|------------------|--------|------------------|-------|-----------------|------|-----------------|------|-----------------|------|------------------|-------|------------------|--------|-----------------|------|------------------|-------|-----------------|------|-----------------|------|-----------------|------|-----------------|------|
| 21F15806           | 24.0 % | ✓ | 0.0282425       | 1.38 | 0.0000000       | 0.00 | 0.0001113        | 9.95  | 0.0000000        | 0.00   | 0.4117324        | 9.94  | 0.0053237       | 1.39 | 0.0000000       | 0.00 | 1.014721        | 0.10 | 0.0000741        | 13.84 | 0.0000000        | 0.00   | 84.0209         | 0.04 | 0.0002645        | 9.99  | 270.1034        | 0.04 | 8.43207         | 1.38 | 0.0000000       | 0.00 | 0.0510007       | 9.65 |
| 21F15808           | 24.0 % | ✓ | 0.0185708       | 2.03 | 0.0000000       | 0.00 | 0.0000850        | 12.08 | 0.0000004        | 255.14 | 0.3144997        | 12.08 | 0.0035006       | 2.04 | 0.0000000       | 0.00 | 0.625347        | 0.10 | 0.0000566        | 15.45 | 0.0035190        | 255.14 | 51.7800         | 0.05 | 0.0002021        | 12.11 | 166.4933        | 0.07 | 5.54450         | 2.04 | 0.0000000       | 0.00 | 0.0314305       | 9.65 |
| 21F15809           | 24.0 % | ✓ | 0.0621643       | 0.80 | 0.0000000       | 0.00 | 0.0000347        | 30.60 | 0.0000007        | 159.98 | 0.1283894        | 30.60 | 0.0117180       | 0.81 | 0.0000000       | 0.00 | 0.264563        | 0.11 | 0.0000231        | 32.08 | 0.0057856        | 159.98 | 21.9064         | 0.06 | 0.0000825        | 30.61 | 70.2833         | 0.22 | 18.55978        | 0.80 | 0.0000000       | 0.00 | 0.0132972       | 9.65 |
| 21F15811           | 24.0 % | ✓ | 0.0040219       | 8.52 | 0.0000000       | 0.00 | 0.0000792        | 12.76 | 0.0000012        | 93.55  | 0.2928270        | 12.76 | 0.0007581       | 8.52 | 0.0000000       | 0.00 | 0.650346        | 0.10 | 0.0000527        | 15.98 | 0.0101493        | 93.55  | 53.8500         | 0.04 | 0.0001881        | 12.79 | 173.4018        | 0.06 | 1.20077         | 8.52 | 0.0000000       | 0.00 | 0.0326869       | 9.65 |
| 21F15812           | 24.0 % | ✓ | 0.0129417       | 2.77 | 0.0000000       | 0.00 | 0.0001572        | 6.42  | 0.0000039        | 27.91  | 0.5814726        | 6.42  | 0.0024395       | 2.78 | 0.0000000       | 0.00 | 1.135468        | 0.10 | 0.0001047        | 11.57 | 0.0337565        | 27.93  | 94.0190         | 0.04 | 0.0003736        | 6.48  | 302.5592        | 0.04 | 3.86388         | 2.77 | 0.0000000       | 0.00 | 0.0570696       | 9.65 |
| 21F15814           | 24.0 % | ✓ | 0.0217114       | 1.71 | 0.0000000       | 0.00 | 0.0000847        | 12.24 | 0.0000003        | 376.96 | 0.3133892        | 12.24 | 0.0040926       | 1.72 | 0.0000000       | 0.00 | 0.791183        | 0.10 | 0.0000564        | 15.58 | 0.0024236        | 376.96 | 65.5116         | 0.04 | 0.0002014        | 12.28 | 210.2864        | 0.05 | 6.48214         | 1.71 | 0.0000000       | 0.00 | 0.0397655       | 9.65 |
| 21F15815           | 24.0 % | ✓ | 0.0127272       | 2.77 | 0.0000000       | 0.00 | 0.0001097        | 9.28  | 0.0000008        | 134.90 | 0.4058012        | 9.28  | 0.0023991       | 2.77 | 0.0000000       | 0.00 | 0.942662        | 0.10 | 0.0000730        | 13.37 | 0.0068443        | 134.90 | 78.0543         | 0.04 | 0.0002607        | 9.32  | 250.8897        | 0.04 | 3.79983         | 2.77 | 0.0000000       | 0.00 | 0.0473790       | 9.65 |
| 21F15817           | 24.0 % | ✓ | 0.0241249       | 1.67 | 0.0000000       | 0.00 | 0.0001207        | 8.51  | 0.0000000        | 0.00   | 0.4465677        | 8.51  | 0.0045476       | 1.68 | 0.0000000       | 0.00 | 0.865492        | 0.10 | 0.0000804        | 12.85 | 0.0000000        | 0.00   | 71.6645         | 0.04 | 0.0002869        | 8.56  | 230.9260        | 0.05 | 7.20274         | 1.67 | 0.0000000       | 0.00 | 0.0435003       | 9.65 |
| 21F15820           | 24.0 % | ✓ | 0.0218633       | 1.82 | 0.0000000       | 0.00 | 0.0000527        | 20.24 | 0.0000000        | 0.00   | 0.1951080        | 20.24 | 0.0041212       | 1.83 | 0.0000000       | 0.00 | 0.428381        | 0.10 | 0.0000351        | 22.42 | 0.0000000        | 0.00   | 35.4708         | 0.05 | 0.0001254        | 20.26 | 114.0323        | 0.11 | 6.52752         | 1.83 | 0.0000000       | 0.00 | 0.0215308       | 9.65 |
| 21F15821           | 24.0 % | ✓ | 0.0094969       | 3.89 | 0.0000000       | 0.00 | 0.0000552        | 18.96 | 0.0000000        | 0.00   | 0.2043341        | 18.96 | 0.0017902       | 3.89 | 0.0000000       | 0.00 | 0.462076        | 0.10 | 0.0000368        | 21.27 | 0.0000000        | 0.00   | 38.2609         | 0.05 | 0.0001313        | 18.98 | 123.6118        | 0.09 | 2.83540         | 3.89 | 0.0000000       | 0.00 | 0.0232243       | 9.65 |
| 21F15823           | 24.0 % |   | 0.1136666       | 0.50 | 0.0000000       | 0.00 | 0.0001062        | 9.12  | 0.0000034        | 30.14  | 0.3927751        | 9.12  | 0.0214262       | 0.52 | 0.0000000       | 0.00 | 0.310234        | 0.11 | 0.0000707        | 13.26 | 0.0291436        | 30.15  | 25.6880         | 0.06 | 0.0002524        | 9.17  | 94.5712         | 0.18 | 33.93630        | 0.51 | 0.0000000       | 0.00 | 0.0155926       | 9.65 |
| 21F15824           | 24.0 % | ✓ | 0.1391109       | 0.53 | 0.0000000       | 0.00 | 0.0000738        | 13.52 | 0.0000035        | 31.41  | 0.2731465        | 13.52 | 0.0262224       | 0.55 | 0.0000000       | 0.00 | 0.704882        | 0.10 | 0.0000492        | 16.60 | 0.0295837        | 31.42  | 58.3657         | 0.04 | 0.0001755        | 13.55 | 187.4435        | 0.12 | 41.53295        | 0.54 | 0.0000000       | 0.00 | 0.0354280       | 9.65 |
| 21F15826           | 24.0 % | ✓ | 0.0139348       | 2.77 | 0.0000000       | 0.00 | 0.0000485        | 19.28 | 0.0000000        | 0.00   | 0.1794876        | 19.28 | 0.0026267       | 2.77 | 0.0000000       | 0.00 | 0.392509        | 0.10 | 0.0000323        | 21.55 | 0.0000000        | 0.00   | 32.5006         | 0.05 | 0.0001153        | 19.30 | 104.4000        | 0.11 | 4.16036         | 2.77 | 0.0000000       | 0.00 | 0.0197278       | 9.65 |
| 21F15827           | 24.0 % | ✓ | 0.0157087       | 2.47 | 0.0000000       | 0.00 | 0.0000444        | 21.39 | 0.0000010        | 113.73 | 0.1644289        | 21.39 | 0.0029611       | 2.47 | 0.0000000       | 0.00 | 0.502564        | 0.10 | 0.0000296        | 23.46 | 0.0083435        | 113.73 | 41.6133         | 0.05 | 0.0001056        | 21.41 | 133.9600        | 0.09 | 4.69000         | 2.47 | 0.0000000       | 0.00 | 0.0252593       | 9.65 |
| 21F15829           | 24.0 % | ✓ | 0.4337712       | 0.28 | 0.0000000       | 0.00 | 0.0000720        | 12.37 | 0.0000002        | 415.43 | 0.2664684        | 12.37 | 0.0817659       | 0.32 | 0.0000000       | 0.00 | 0.756390        | 0.10 | 0.0000480        | 15.67 | 0.0021071        | 415.43 | 62.6306         | 0.04 | 0.0001712        | 12.40 | 201.1369        | 0.19 | 129.50671       | 0.30 | 0.0000000       | 0.00 | 0.0380168       | 9.65 |
| 21F15830           | 24.0 % | ✓ | 0.0972139       | 0.62 | 0.0000000       | 0.00 | 0.0003398        | 2.91  | 0.0000000        | 0.00   | 1.2572323        | 2.90  | 0.0183248       | 0.64 | 0.0000000       | 0.00 | 0.455456        | 0.10 | 0.0002263        | 10.06 | 0.0000000        | 0.00   | 37.7127         | 0.05 | 0.0008078        | 3.05  | 120.7754        | 0.15 | 29.02418        | 0.63 | 0.0000000       | 0.00 | 0.0228916       | 9.65 |
| 21F15832           | 24.0 % | ✓ | 0.5322839       | 0.26 | 0.0000000       | 0.00 | 0.0001549        | 6.52  | 0.0000000        | 0.00   | 0.5732327        | 6.52  | 0.1003355       | 0.31 | 0.0000000       | 0.00 | 0.965067        | 0.10 | 0.0001032        | 11.63 | 0.0000000        | 0.00   | 79.9095         | 0.04 | 0.0003683        | 6.58  | 259.0206        | 0.17 | 158.91868       | 0.28 | 0.0000000       | 0.00 | 0.0485051       | 9.65 |
| 21F15833           | 24.0 % | ✓ | 0.0194969       | 2.03 | 0.0000000       | 0.00 | 0.0000938        | 10.12 | 0.0000000        | #####  | 0.3470952        | 10.12 | 0.0036752       | 2.03 | 0.0000000       | 0.00 | 0.528397        | 0.10 | 0.0000625        | 13.97 | 0.0001312        | #####  | 43.7524         | 0.05 | 0.0002230        | 10.17 | 140.6289        | 0.09 | 5.82100         | 2.03 | 0.0000000       | 0.00 | 0.0265577       | 9.65 |
| 21F15835           | 24.0 % | ✓ | 0.0049247       | 6.45 | 0.0000000       | 0.00 | 0.0000588        | 16.95 | 0.0000000        | 0.00   | 0.2173907        | 16.95 | 0.0009283       | 6.45 | 0.0000000       | 0.00 | 0.234501        | 0.11 | 0.0000391        | 19.49 | 0.0000000        | 0.00   | 19.4172         | 0.06 | 0.0001397        | 16.97 | 62.1127         | 0.16 | 1.47031         | 6.45 | 0.0000000       | 0.00 | 0.0117862       | 9.65 |
| 21F15836           | 24.0 % | ✓ | 0.1382928       | 0.50 | 0.0000000       | 0.00 | 0.0001582        | 6.10  | 0.0000011        | 99.23  | 0.5851895        | 6.09  | 0.0260682       | 0.53 | 0.0000000       | 0.00 | 0.888542        | 0.10 | 0.0001053        | 11.40 | 0.0096264        | 99.23  | 73.5731         | 0.04 | 0.0003760        | 6.16  | 236.0425        | 0.09 | 41.28870        | 0.51 | 0.0000000       | 0.00 | 0.0446589       | 9.65 |
| 21F15838           | 24.0 % | ✓ | 0.0728914       | 0.80 | 0.0000000       | 0.00 | 0.0000604        | 16.11 | 0.0000000        | 0.00   | 0.2233734        | 16.11 | 0.0137400       | 0.81 | 0.0000000       | 0.00 | 0.406314        | 0.10 | 0.0000402        | 18.77 | 0.0000000        | 0.00   | 33.6436         | 0.05 | 0.0001435        | 16.14 | 107.9852        | 0.16 | 21.76246        | 0.80 | 0.0000000       | 0.00 | 0.0204217       | 9.65 |
| 21F15841           | 24.0 % | ✓ | 0.0451281       | 1.01 | 0.0000000       | 0.00 | 0.0000893        | 11.41 | 0.0000000        | 0.00   | 0.3305228        | 11.41 | 0.0085066       | 1.02 | 0.0000000       | 0.00 | 0.821676        | 0.10 | 0.0000595        | 14.93 | 0.0000000        | 0.00   | 68.0364         | 0.04 | 0.0002124        | 11.44 | 218.8718        | 0.06 | 13.47345        | 1.02 | 0.0000000       | 0.00 | 0.0412981       | 9.65 |
| 21F15842           | 24.0 % | ✓ | 0.0594254       | 0.80 | 0.0000000       | 0.00 | 0.0000467        | 20.61 | 0.0000006        | 166.85 | 0.1727858        | 20.61 | 0.0112017       | 0.82 | 0.0000000       | 0.00 | 0.565422        | 0.10 | 0.0000311        | 22.74 | 0.0051117        | 166.85 | 46.8181         | 0.05 | 0.0001110        | 20.63 | 150.4454        | 0.10 | 17.74205        | 0.81 | 0.0000000       | 0.00 | 0.0284186       | 9.65 |
| 21F15844           | 24.0 % | ✓ | 0.0960957       | 0.57 | 0.0000000       | 0.00 | 0.0000901        | 11.48 | 0.0000000        | 0.00   | 0.3333186        | 11.48 | 0.0181140       | 0.59 | 0.0000000       | 0.00 | 0.512673        | 0.10 | 0.0000600        | 14.98 | 0.0000000        | 0.00   | 42.4504         | 0.05 | 0.0002142        | 11.51 | 136.3357        | 0.12 | 28.69033        | 0.58 | 0.0000000       | 0.00 | 0.0257674       | 9.65 |
| 21F15845           | 24.0 % | ✓ | 0.3135221       | 0.36 | 0.0000000       | 0.00 | 0.0000768        | 13.09 | 0.0000002        | 541.82 | 0.2841589        | 13.09 | 0.0590989       | 0.39 | 0.0000000       | 0.00 | 0.450668        | 0.10 | 0.0000511        | 16.25 | 0.0018338        | 541.82 | 37.3162         | 0.05 | 0.0001826        | 13.12 | 118.3911        | 0.29 | 93.60517        | 0.37 | 0.0000000       | 0.00 | 0.0226509       | 9.65 |
| 21F15847           | 24.0 % | ✓ | 0.0574609       | 0.89 | 0.0000000       | 0.00 | 0.0001219        | 7.68  | 0.0000001        | #####  | 0.4511621        | 7.68  | 0.0108314       | 0.91 | 0.0000000       | 0.00 | 0.662671        | 0.10 | 0.0000812        | 12.32 | 0.0006480        | #####  | 54.8705         | 0.04 | 0.0002899        | 7.73  | 176.1207        | 0.09 | 17.15554        | 0.90 | 0.0000000       | 0.00 | 0.0333064       | 9.65 |
| 21F15848           | 24.0 % | ✓ | 0.0188806       | 2.10 | 0.0000000       | 0.00 | 0.0000584        | 16.62 | 0.0000000        | 0.00   | 0.2160970        | 16.62 | 0.0035590       | 2.11 | 0.0000000       | 0.00 | 0.327963        | 0.11 | 0.0000389        | 19.21 | 0.0000000        | 0.00   | 27.1560         | 0.05 | 0.0001388        | 16.64 | 87.2756         | 0.14 | 5.63699         | 2.10 | 0.0000000       | 0.00 | 0.0164837       | 9.65 |
| Σ                  |        |   | 2.3876735       | 0.13 | 0.0000000       | 0.00 | 0.0025846        | 2.01  | 0.0000174        | 24.22  | 9.5619868        | 2.01  | 0.4500765       | 0.14 | 0.0000000       | 0.00 | 16.666171       | 0.02 | 0.0017212        | 2.96  | 0.1490073        | 24.22  | 1379.9926       | 0.01 | 0.0061436        | 2.02  | 4448.1044       | 0.02 | 712.86381       | 0.14 | 0.0000000       | 0.00 | 0.8376555       | 1.99 |
| Σ                  |        |   |                 |      |                 |      |                  |       | 2.3902756        | 0.13   | 9.5619868        | 2.01  |                 |      |                 |      |                 |      |                  |       | 17.266976        | 0.21   |                 |      |                  |       |                 |      |                 |      |                 |      | 5161.8058       | 0.03 |

| Additional Parameters |        |   | 40Ar/39Ar | 1σ       | 37Ar/39Ar | 1σ       | 36Ar/39Ar | 1σ       | Time (days) | 37Ar (decay) | 39Ar (decay) | 40Ar (moles) |
|-----------------------|--------|---|-----------|----------|-----------|----------|-----------|----------|-------------|--------------|--------------|--------------|
| 21F15806              | 24.0 % | ✓ | 3.315668  | 0.001445 | 0.004900  | 0.000487 | 0.000337  | 0.000005 | 71.922      | 4.149808     | 1.00050849   | 9.862E-12    |
| 21F15808              | 24.0 % | ✓ | 3.323069  | 0.001631 | 0.006074  | 0.000733 | 0.000360  | 0.000007 | 71.933      | 4.150775     | 1.00050857   | 6.091E-12    |
| 21F15809              | 24.0 % | ✓ | 4.056178  | 0.002698 | 0.005861  | 0.001793 | 0.002839  | 0.000023 | 71.940      | 4.151288     | 1.00050862   | 3.146E-12    |
| 21F15811              | 24.0 % | ✓ | 3.242984  | 0.001546 | 0.005438  | 0.000694 | 0.000076  | 0.000006 | 71.951      | 4.152256     | 1.00050870   | 6.182E-12    |
| 21F15812              | 24.0 % | ✓ | 3.259754  | 0.001387 | 0.006185  | 0.000397 | 0.000139  | 0.000004 | 71.958      | 4.152769     | 1.00050874   | 1.085E-11    |
| 21F15814              | 24.0 % | ✓ | 3.309456  | 0.001492 | 0.004784  | 0.000586 | 0.000333  | 0.000006 | 71.969      | 4.153737     | 1.00050883   | 7.675E-12    |
| 21F15815              | 24.0 % | ✓ | 3.263576  | 0.001418 | 0.005199  | 0.000482 | 0.000164  | 0.000005 | 71.976      | 4.154250     | 1.00050887   | 9.018E-12    |
| 21F15817              | 24.0 % | ✓ | 3.323422  | 0.001460 | 0.006231  | 0.000530 | 0.000338  | 0.000006 | 71.988      | 4.155219     | 1.00050896   | 8.431E-12    |
| 21F15820              | 24.0 % | ✓ | 3.399439  | 0.001899 | 0.005501  | 0.001113 | 0.000618  | 0.000011 | 72.006      | 4.156701     | 1.00050908   | 4.269E-12    |
| 21F15821              | 24.0 % | ✓ | 3.305466  | 0.001834 | 0.005341  | 0.001013 | 0.000250  | 0.000010 | 72.012      | 4.157214     | 1.00050913   | 4.477E-12    |
| 21F15823              | 24.0 % |   | 5.003176  | 0.003097 | 0.015290  | 0.001394 | 0.004429  | 0.000022 | 72.024      | 4.158184     | 1.00050921   | 4.550E-12    |
| 21F15824              | 24.0 % | ✓ | 3.923730  | 0.001787 | 0.004680  | 0.000633 | 0.002385  | 0.000013 | 72.029      | 4.158640     | 1.00050925   | 8.107E-12    |
| 21F15826              | 24.0 % | ✓ | 3.340857  | 0.001857 | 0.005523  | 0.001065 | 0.000430  | 0.000012 | 72.042      | 4.159667     | 1.00050934   | 3.844E-12    |
| 21F15827              | 24.0 % | ✓ | 3.332461  | 0.001675 | 0.003951  | 0.000845 | 0.000379  | 0.000009 | 72.047      | 4.160123     | 1.00050938   | 4.909E-12    |
| 21F15829              | 24.0 % | ✓ | 5.279859  | 0.002372 | 0.004255  | 0.000526 | 0.006927  | 0.000020 | 72.059      | 4.161094     | 1.00050946   | 1.171E-11    |
| 21F15830              | 24.0 % | ✓ | 3.972649  | 0.002162 | 0.033336  | 0.000968 | 0.002587  | 0.000016 | 72.065      | 4.161607     | 1.00050950   | 5.304E-12    |
| 21F15832              | 24.0 % | ✓ | 5.230739  | 0.002237 | 0.007173  | 0.000468 | 0.006663  | 0.000018 | 72.077      | 4.162578     | 1.00050959   | 1.480E-11    |
| 21F15833              | 24.0 % | ✓ | 3.347837  | 0.001683 | 0.007933  | 0.000803 | 0.000448  | 0.000009 | 72.083      | 4.163092     | 1.00050963   | 5.185E-12    |
| 21F15835              | 24.0 % | ✓ | 3.275159  | 0.002444 | 0.011196  | 0.001897 | 0.000257  | 0.000016 | 72.095      | 4.164063     | 1.00050972   | 2.251E-12    |
| 21F15836              | 24.0 % | ✓ | 3.770053  | 0.001685 | 0.007954  | 0.000485 | 0.001882  | 0.000010 | 72.101      | 4.164577     | 1.00050976   | 9.819E-12    |
| 21F15838              | 24.0 % | ✓ | 3.857121  | 0.002117 | 0.006639  | 0.001070 | 0.002168  | 0.000017 | 72.113      | 4.165548     | 1.00050984   | 4.594E-12    |
| 21F15841              | 24.0 % | ✓ | 3.415609  | 0.001522 | 0.004858  | 0.000554 | 0.000665  | 0.000007 | 72.131      | 4.167034     | 1.00050997   | 8.226E-12    |
| 21F15842              | 24.0 % | ✓ | 3.592961  | 0.001798 | 0.003691  | 0.000760 | 0.001270  | 0.000010 | 72.138      | 4.167548     | 1.00051001   | 5.955E-12    |
| 21F15844              | 24.0 % | ✓ | 3.888093  | 0.001965 | 0.007852  | 0.000901 | 0.002266  | 0.000013 | 72.149      | 4.168520     | 1.00051010   | 5.843E-12    |
| 21F15845              | 24.0 % | ✓ | 5.681658  | 0.002904 | 0.007615  | 0.000997 | 0.008404  | 0.000030 | 72.155      | 4.168977     | 1.00051014   | 7.505E-12    |
| 21F15847              | 24.0 % | ✓ | 3.522995  | 0.001614 | 0.008222  | 0.000631 | 0.001049  | 0.000009 | 72.167      | 4.170007     | 1.00051022   | 6.843E-12    |
| 21F15848              | 24.0 % | ✓ | 3.422027  | 0.002107 | 0.007958  | 0.001322 | 0.000697  | 0.000015 | 72.173      | 4.170465     | 1.00051026   | 3.290E-12    |

| Procedure<br>Blanks |        | 36Ar ± 1σ (SE)<br>[fA] | 37Ar ± 1σ (SE)<br>[fA] | 38Ar ± 1σ (SE)<br>[fA] | 39Ar ± 1σ (SE)<br>[fA] | 40Ar ± 1σ (SE)<br>[fA] |
|---------------------|--------|------------------------|------------------------|------------------------|------------------------|------------------------|
| 21F15806            | 24.0 % | 0.0126733 ± 0.0002114  | 0.0173671 ± 0.0072912  | 0.0011867 ± 0.0074696  | 0.0067293 ± 0.0063916  | 2.8988645 ± 0.0151592  |
| 21F15808            | 24.0 % | 0.0122284 ± 0.0002168  | 0.0177626 ± 0.0068761  | 0.0055221 ± 0.0057490  | 0.0193725 ± 0.0063652  | 2.8902090 ± 0.0158785  |
| 21F15809            | 24.0 % | 0.0122284 ± 0.0002168  | 0.0177626 ± 0.0068761  | 0.0055221 ± 0.0057490  | 0.0193725 ± 0.0063652  | 2.8902090 ± 0.0158785  |
| 21F15811            | 24.0 % | 0.0128954 ± 0.0002063  | 0.0127994 ± 0.0066716  | 0.0041024 ± 0.0057092  | 0.0225183 ± 0.0066676  | 2.8584739 ± 0.0157845  |
| 21F15812            | 24.0 % | 0.0128954 ± 0.0002063  | 0.0127994 ± 0.0066716  | 0.0041024 ± 0.0057092  | 0.0225183 ± 0.0066676  | 2.8584739 ± 0.0157845  |
| 21F15814            | 24.0 % | 0.0116365 ± 0.0001790  | 0.0184561 ± 0.0064046  | 0.0054275 ± 0.0061947  | 0.0135287 ± 0.0059371  | 2.8991892 ± 0.0160273  |
| 21F15815            | 24.0 % | 0.0116365 ± 0.0001790  | 0.0184561 ± 0.0064046  | 0.0054275 ± 0.0061947  | 0.0135287 ± 0.0059371  | 2.8991892 ± 0.0160273  |
| 21F15817            | 24.0 % | 0.0123277 ± 0.0002121  | 0.0029678 ± 0.0071197  | 0.0054016 ± 0.0067521  | 0.0296065 ± 0.0061425  | 2.8542987 ± 0.0162693  |
| 21F15820            | 24.0 % | 0.0124867 ± 0.0002207  | 0.0151341 ± 0.0065489  | 0.0087100 ± 0.0061465  | 0.0159628 ± 0.0067913  | 2.9057910 ± 0.0171238  |
| 21F15821            | 24.0 % | 0.0124867 ± 0.0002207  | 0.0151341 ± 0.0065489  | 0.0087100 ± 0.0061465  | 0.0159628 ± 0.0067913  | 2.9057910 ± 0.0171238  |
| 21F15823            | 24.0 % | 0.0118695 ± 0.0002246  | 0.0204448 ± 0.0060515  | 0.0178488 ± 0.0058368  | 0.0122943 ± 0.0062510  | 2.7979612 ± 0.0140135  |
| 21F15824            | 24.0 % | 0.0118695 ± 0.0002246  | 0.0204448 ± 0.0060515  | 0.0178488 ± 0.0058368  | 0.0122943 ± 0.0062510  | 2.7979612 ± 0.0140135  |
| 21F15826            | 24.0 % | 0.0122434 ± 0.0002215  | 0.0180149 ± 0.0057859  | 0.0043268 ± 0.0066275  | 0.0149852 ± 0.0056571  | 2.8161019 ± 0.0153396  |
| 21F15827            | 24.0 % | 0.0122434 ± 0.0002215  | 0.0180149 ± 0.0057859  | 0.0043268 ± 0.0066275  | 0.0149852 ± 0.0056571  | 2.8161019 ± 0.0153396  |
| 21F15829            | 24.0 % | 0.0122833 ± 0.0002156  | 0.0285178 ± 0.0055671  | 0.0138770 ± 0.0056546  | 0.0255390 ± 0.0073276  | 2.9123363 ± 0.0164266  |
| 21F15830            | 24.0 % | 0.0122833 ± 0.0002156  | 0.0285178 ± 0.0055671  | 0.0138770 ± 0.0056546  | 0.0255390 ± 0.0073276  | 2.9123363 ± 0.0164266  |
| 21F15832            | 24.0 % | 0.0122579 ± 0.0002044  | 0.0047972 ± 0.0065771  | 0.0048011 ± 0.0068738  | 0.0245757 ± 0.0064053  | 2.8980925 ± 0.0155808  |
| 21F15833            | 24.0 % | 0.0122579 ± 0.0002044  | 0.0047972 ± 0.0065771  | 0.0048011 ± 0.0068738  | 0.0245757 ± 0.0064053  | 2.8980925 ± 0.0155808  |
| 21F15835            | 24.0 % | 0.0119125 ± 0.0002235  | 0.0082952 ± 0.0059331  | 0.0046814 ± 0.0062699  | 0.0288078 ± 0.0059998  | 2.8572980 ± 0.0163427  |
| 21F15836            | 24.0 % | 0.0119125 ± 0.0002235  | 0.0082952 ± 0.0059331  | 0.0046814 ± 0.0062699  | 0.0288078 ± 0.0059998  | 2.8572980 ± 0.0163427  |
| 21F15838            | 24.0 % | 0.0122434 ± 0.0002215  | 0.0180149 ± 0.0057859  | 0.0043268 ± 0.0066275  | 0.0149852 ± 0.0056571  | 2.8161019 ± 0.0153396  |
| 21F15841            | 24.0 % | 0.0122833 ± 0.0002156  | 0.0285178 ± 0.0055671  | 0.0138770 ± 0.0056546  | 0.0255390 ± 0.0073276  | 2.9123363 ± 0.0164266  |
| 21F15842            | 24.0 % | 0.0122833 ± 0.0002156  | 0.0285178 ± 0.0055671  | 0.0138770 ± 0.0056546  | 0.0255390 ± 0.0073276  | 2.9123363 ± 0.0164266  |
| 21F15844            | 24.0 % | 0.0122579 ± 0.0002044  | 0.0047972 ± 0.0065771  | 0.0048011 ± 0.0068738  | 0.0245757 ± 0.0064053  | 2.8980925 ± 0.0155808  |
| 21F15845            | 24.0 % | 0.0122579 ± 0.0002044  | 0.0047972 ± 0.0065771  | 0.0048011 ± 0.0068738  | 0.0245757 ± 0.0064053  | 2.8980925 ± 0.0155808  |
| 21F15847            | 24.0 % | 0.0119125 ± 0.0002235  | 0.0082952 ± 0.0059331  | 0.0046814 ± 0.0062699  | 0.0288078 ± 0.0059998  | 2.8572980 ± 0.0163427  |
| 21F15848            | 24.0 % | 0.0119125 ± 0.0002235  | 0.0082952 ± 0.0059331  | 0.0046814 ± 0.0062699  | 0.0288078 ± 0.0059998  | 2.8572980 ± 0.0163427  |

| Intercept Values |        | 36Ar ± 1σ (SE) [fA]   |        | r2  | Regression (type,n) | 37Ar ± 1σ (SE) [fA]   |        | r2  | Regression (type,n) | 38Ar ± 1σ (SE) [fA]   |        | r2  | Regression (type,n) | 39Ar ± 1σ (SE) [fA]   |        | r2  | Regression (type,n) | 40Ar ± 1σ (SE) [fA]   |        | r2  | Regression (type,n) |
|------------------|--------|-----------------------|--------|-----|---------------------|-----------------------|--------|-----|---------------------|-----------------------|--------|-----|---------------------|-----------------------|--------|-----|---------------------|-----------------------|--------|-----|---------------------|
| 21F15806         | 24.0 % | 0.0393537 ± 0.0002962 | 0.7263 | EXP | 150 of 150          | 0.1159195 ± 0.0065456 | 0.0253 | EXP | 150 of 150          | 1.0021184 ± 0.0071790 | 0.6814 | EXP | 146 of 150          | 83.7977740 ± 0.013616 | 0.9998 | EXP | 150 of 150          | 281.485295 ± 0.029043 | 0.9999 | EXP | 149 of 150          |
| 21F15808         | 24.0 % | 0.0297837 ± 0.0002803 | 0.7975 | EXP | 150 of 150          | 0.0930238 ± 0.0059399 | 0.0043 | EXP | 150 of 150          | 0.6240724 ± 0.0066497 | 0.4681 | EXP | 149 of 150          | 51.6577719 ± 0.011778 | 0.9996 | EXP | 150 of 150          | 174.959413 ± 0.025041 | 0.9997 | EXP | 150 of 150          |
| 21F15809         | 24.0 % | 0.0707574 ± 0.0004033 | 0.0000 | EXP | 150 of 150          | 0.0484830 ± 0.0064085 | 0.0003 | EXP | 150 of 150          | 0.2753059 ± 0.0071648 | 0.1419 | EXP | 150 of 150          | 21.865793 ± 0.007987  | 0.9989 | EXP | 149 of 150          | 91.746624 ± 0.019498  | 0.9991 | EXP | 145 of 150          |
| 21F15811         | 24.0 % | 0.0167555 ± 0.0002474 | 0.8965 | EXP | 150 of 150          | 0.0828492 ± 0.0059441 | 0.0001 | EXP | 148 of 150          | 0.6542459 ± 0.0073417 | 0.5025 | EXP | 150 of 150          | 53.725144 ± 0.010126  | 0.9997 | EXP | 150 of 150          | 177.493690 ± 0.027135 | 0.9997 | EXP | 150 of 150          |
| 21F15812         | 24.0 % | 0.0252249 ± 0.0002665 | 0.8696 | EXP | 150 of 150          | 0.1518816 ± 0.0059239 | 0.0824 | EXP | 149 of 150          | 1.1624250 ± 0.0068237 | 0.7899 | EXP | 150 of 150          | 93.784332 ± 0.013233  | 0.9998 | EXP | 148 of 150          | 309.338662 ± 0.029744 | 0.9999 | EXP | 149 of 150          |
| 21F15814         | 24.0 % | 0.0321465 ± 0.0002980 | 0.7829 | EXP | 150 of 150          | 0.0933981 ± 0.0065672 | 0.0297 | EXP | 150 of 150          | 0.7887598 ± 0.0063396 | 0.6308 | EXP | 148 of 150          | 65.345788 ± 0.011715  | 0.9997 | EXP | 150 of 150          | 219.707513 ± 0.025230 | 0.9998 | EXP | 150 of 150          |
| 21F15815         | 24.0 % | 0.0237166 ± 0.0002780 | 0.8652 | EXP | 150 of 150          | 0.1154850 ± 0.0063214 | 0.0261 | EXP | 150 of 150          | 0.9422925 ± 0.0063415 | 0.7156 | EXP | 148 of 150          | 77.854208 ± 0.011621  | 0.9998 | EXP | 150 of 150          | 257.636143 ± 0.028930 | 0.9999 | EXP | 148 of 150          |
| 21F15817         | 24.0 % | 0.0351425 ± 0.0003115 | 0.7946 | EXP | 150 of 150          | 0.1097192 ± 0.0056393 | 0.0006 | EXP | 150 of 150          | 0.8601346 ± 0.0072303 | 0.6214 | EXP | 150 of 150          | 71.498008 ± 0.011539  | 0.9998 | EXP | 146 of 150          | 241.026550 ± 0.024863 | 0.9999 | EXP | 150 of 150          |
| 21F15820         | 24.0 % | 0.0331094 ± 0.0003013 | 0.7581 | EXP | 147 of 150          | 0.0617578 ± 0.0067954 | 0.0005 | EXP | 150 of 150          | 0.4222316 ± 0.0066028 | 0.3146 | EXP | 148 of 150          | 35.389712 ± 0.009992  | 0.9994 | EXP | 150 of 150          | 123.487105 ± 0.021345 | 0.9995 | EXP | 146 of 150          |
| 21F15821         | 24.0 % | 0.0214751 ± 0.0002676 | 0.8656 | EXP | 149 of 150          | 0.0639565 ± 0.0065408 | 0.0035 | EXP | 150 of 150          | 0.4550500 ± 0.0072331 | 0.2675 | EXP | 150 of 150          | 38.172108 ± 0.010889  | 0.9993 | EXP | 150 of 150          | 129.376204 ± 0.022763 | 0.9995 | EXP | 150 of 150          |
| 21F15823         | 24.0 % | 0.1189312 ± 0.0004549 | 0.5630 | EXP | 146 of 150          | 0.1142702 ± 0.0060442 | 0.0636 | EXP | 150 of 150          | 0.3414120 ± 0.0064462 | 0.3639 | EXP | 147 of 150          | 25.630193 ± 0.009670  | 0.9989 | EXP | 150 of 150          | 131.321030 ± 0.020444 | 0.9996 | EXP | 149 of 150          |
| 21F15824         | 24.0 % | 0.1428435 ± 0.0006218 | 0.5690 | EXP | 150 of 150          | 0.0856864 ± 0.0064142 | 0.0231 | EXP | 150 of 150          | 0.7394860 ± 0.0069197 | 0.6055 | EXP | 150 of 150          | 58.218202 ± 0.011214  | 0.9997 | EXP | 150 of 150          | 231.809845 ± 0.024164 | 0.9999 | EXP | 150 of 150          |
| 21F15826         | 24.0 % | 0.0254014 ± 0.0002862 | 0.7882 | EXP | 150 of 150          | 0.0608753 ± 0.0058990 | 0.0014 | EXP | 148 of 150          | 0.3898204 ± 0.0066368 | 0.2460 | EXP | 150 of 150          | 32.426588 ± 0.009137  | 0.9994 | EXP | 150 of 150          | 111.396183 ± 0.020341 | 0.9994 | EXP | 149 of 150          |
| 21F15827         | 24.0 % | 0.0270678 ± 0.0002885 | 0.8156 | EXP | 150 of 150          | 0.0572751 ± 0.0060845 | 0.0008 | EXP | 150 of 150          | 0.5159266 ± 0.0066022 | 0.4324 | EXP | 149 of 150          | 41.514393 ± 0.010134  | 0.9995 | EXP | 150 of 150          | 141.491320 ± 0.018785 | 0.9997 | EXP | 150 of 150          |
| 21F15829         | 24.0 % | 0.4205235 ± 0.0009315 | 0.9466 | EXP | 150 of 150          | 0.0921268 ± 0.0055555 | 0.0269 | EXP | 150 of 150          | 0.8504288 ± 0.0063036 | 0.7263 | EXP | 145 of 150          | 62.484649 ± 0.011561  | 0.9997 | EXP | 150 of 150          | 333.593920 ± 0.028462 | 0.9999 | EXP | 150 of 150          |
| 21F15830         | 24.0 % | 0.1040799 ± 0.0005023 | 0.2587 | EXP | 150 of 150          | 0.3285960 ± 0.0066695 | 0.1010 | EXP | 150 of 150          | 0.4692831 ± 0.0070604 | 0.3237 | EXP | 149 of 150          | 37.635659 ± 0.010557  | 0.9994 | EXP | 149 of 150          | 152.734758 ± 0.023046 | 0.9997 | EXP | 150 of 150          |
| 21F15832         | 24.0 % | 0.5132749 ± 0.0010515 | 0.9569 | EXP | 149 of 150          | 0.1415854 ± 0.0060092 | 0.0554 | EXP | 150 of 150          | 1.0530794 ± 0.0068045 | 0.7198 | EXP | 150 of 150          | 79.715446 ± 0.012818  | 0.9998 | EXP | 147 of 150          | 420.885863 ± 0.030677 | 0.9999 | EXP | 150 of 150          |
| 21F15833         | 24.0 % | 0.0306925 ± 0.0003091 | 0.7798 | EXP | 150 of 150          | 0.0876129 ± 0.0051955 | 0.0017 | EXP | 149 of 150          | 0.5346864 ± 0.0067686 | 0.4367 | EXP | 150 of 150          | 43.657240 ± 0.010092  | 0.9996 | EXP | 148 of 150          | 149.374587 ± 0.021975 | 0.9997 | EXP | 148 of 150          |
| 21F15835         | 24.0 % | 0.0166019 ± 0.0001978 | 0.9202 | EXP | 148 of 150          | 0.0601518 ± 0.0064808 | 0.0039 | EXP | 150 of 150          | 0.2307512 ± 0.0072439 | 0.0593 | EXP | 150 of 150          | 19.392911 ± 0.007860  | 0.9987 | EXP | 149 of 150          | 66.452130 ± 0.018647  | 0.9971 | EXP | 145 of 150          |
| 21F15836         | 24.0 % | 0.1421939 ± 0.0005835 | 0.5663 | EXP | 149 of 150          | 0.1478696 ± 0.0060864 | 0.0586 | EXP | 150 of 150          | 0.9248889 ± 0.0067601 | 0.6969 | EXP | 150 of 150          | 73.400613 ± 0.013433  | 0.9997 | EXP | 150 of 150          | 280.233166 ± 0.030725 | 0.9999 | EXP | 150 of 150          |
| 21F15838         | 24.0 % | 0.0808899 ± 0.0004884 | 0.0001 | EXP | 149 of 150          | 0.0712796 ± 0.0063363 | 0.0066 | EXP | 150 of 150          | 0.4225167 ± 0.0063437 | 0.3291 | EXP | 149 of 150          | 33.566523 ± 0.009846  | 0.9993 | EXP | 150 of 150          | 132.584151 ± 0.022005 | 0.9996 | EXP | 148 of 150          |
| 21F15841         | 24.0 % | 0.0548323 ± 0.0003653 | 0.4477 | EXP | 150 of 150          | 0.1073048 ± 0.0070524 | 0.0108 | EXP | 150 of 150          | 0.8286719 ± 0.0069076 | 0.6131 | EXP | 150 of 150          | 67.875678 ± 0.011372  | 0.9998 | EXP | 148 of 150          | 235.298922 ± 0.023040 | 0.9999 | EXP | 146 of 150          |
| 21F15842         | 24.0 % | 0.0682463 ± 0.0003841 | 0.1366 | EXP | 150 of 150          | 0.0696998 ± 0.0064037 | 0.0152 | EXP | 150 of 150          | 0.5930411 ± 0.0061590 | 0.5698 | EXP | 147 of 150          | 46.715384 ± 0.010638  | 0.9996 | EXP | 150 of 150          | 171.128228 ± 0.024039 | 0.9997 | EXP | 150 of 150          |
| 21F15844         | 24.0 % | 0.1027672 ± 0.0004500 | 0.2992 | EXP | 148 of 150          | 0.0842223 ± 0.0063098 | 0.0155 | EXP | 149 of 150          | 0.5231004 ± 0.0065975 | 0.4490 | EXP | 150 of 150          | 42.358775 ± 0.010236  | 0.9995 | EXP | 150 of 150          | 167.949844 ± 0.024056 | 0.9997 | EXP | 148 of 150          |
| 21F15845         | 24.0 % | 0.3073500 ± 0.0009267 | 0.8974 | EXP | 150 of 150          | 0.0725008 ± 0.0059343 | 0.0000 | EXP | 149 of 150          | 0.5141642 ± 0.0070015 | 0.3416 | EXP | 150 of 150          | 37.238666 ± 0.009725  | 0.9995 | EXP | 149 of 150          | 214.917043 ± 0.025149 | 0.9998 | EXP | 150 of 150          |
| 21F15847         | 24.0 % | 0.0660972 ± 0.0004189 | 0.1557 | EXP | 150 of 150          | 0.1157624 ± 0.0057259 | 0.0274 | EXP | 150 of 150          | 0.6758974 ± 0.0074866 | 0.4849 | EXP | 150 of 150          | 54.749192 ± 0.010023  | 0.9997 | EXP | 149 of 150          | 196.166858 ± 0.022320 | 0.9998 | EXP | 149 of 150          |
| 21F15848         | 24.0 % | 0.0297338 ± 0.0002974 | 0.7611 | EXP | 148 of 150          | 0.0597641 ± 0.0061599 | 0.0001 | EXP | 149 of 150          | 0.3338172 ± 0.0066292 | 0.1786 | EXP | 150 of 150          | 27.110518 ± 0.008883  | 0.9991 | EXP | 150 of 150          | 95.786405 ± 0.020297  | 0.9990 | EXP | 149 of 150          |

| Project Info |        | Analyst     | Irradiation | X-pos | Y-pos | Z/H-pos | Project                | Experiment | Nmb |
|--------------|--------|-------------|-------------|-------|-------|---------|------------------------|------------|-----|
| 21F15806     | 24.0 % | Dan Miggins | 21-OSU-04   | 0.00  | 0.00  | 1.28    | Oregon\Swenton (20-01) | 21F15801   | 01  |
| 21F15808     | 24.0 % | Dan Miggins | 21-OSU-04   | 0.00  | 0.00  | 1.28    | Oregon\Swenton (20-01) | 21F15801   | 01  |
| 21F15809     | 24.0 % | Dan Miggins | 21-OSU-04   | 0.00  | 0.00  | 1.28    | Oregon\Swenton (20-01) | 21F15801   | 01  |
| 21F15811     | 24.0 % | Dan Miggins | 21-OSU-04   | 0.00  | 0.00  | 1.28    | Oregon\Swenton (20-01) | 21F15801   | 01  |
| 21F15812     | 24.0 % | Dan Miggins | 21-OSU-04   | 0.00  | 0.00  | 1.28    | Oregon\Swenton (20-01) | 21F15801   | 01  |
| 21F15814     | 24.0 % | Dan Miggins | 21-OSU-04   | 0.00  | 0.00  | 1.28    | Oregon\Swenton (20-01) | 21F15801   | 01  |
| 21F15815     | 24.0 % | Dan Miggins | 21-OSU-04   | 0.00  | 0.00  | 1.28    | Oregon\Swenton (20-01) | 21F15801   | 01  |
| 21F15817     | 24.0 % | Dan Miggins | 21-OSU-04   | 0.00  | 0.00  | 1.28    | Oregon\Swenton (20-01) | 21F15801   | 01  |
| 21F15820     | 24.0 % | Dan Miggins | 21-OSU-04   | 0.00  | 0.00  | 1.28    | Oregon\Swenton (20-01) | 21F15801   | 01  |
| 21F15821     | 24.0 % | Dan Miggins | 21-OSU-04   | 0.00  | 0.00  | 1.28    | Oregon\Swenton (20-01) | 21F15801   | 01  |
| 21F15823     | 24.0 % | Dan Miggins | 21-OSU-04   | 0.00  | 0.00  | 1.28    | Oregon\Swenton (20-01) | 21F15801   | 01  |
| 21F15824     | 24.0 % | Dan Miggins | 21-OSU-04   | 0.00  | 0.00  | 1.28    | Oregon\Swenton (20-01) | 21F15801   | 01  |
| 21F15826     | 24.0 % | Dan Miggins | 21-OSU-04   | 0.00  | 0.00  | 1.28    | Oregon\Swenton (20-01) | 21F15801   | 01  |
| 21F15827     | 24.0 % | Dan Miggins | 21-OSU-04   | 0.00  | 0.00  | 1.28    | Oregon\Swenton (20-01) | 21F15801   | 01  |
| 21F15829     | 24.0 % | Dan Miggins | 21-OSU-04   | 0.00  | 0.00  | 1.28    | Oregon\Swenton (20-01) | 21F15801   | 01  |
| 21F15830     | 24.0 % | Dan Miggins | 21-OSU-04   | 0.00  | 0.00  | 1.28    | Oregon\Swenton (20-01) | 21F15801   | 01  |
| 21F15832     | 24.0 % | Dan Miggins | 21-OSU-04   | 0.00  | 0.00  | 1.28    | Oregon\Swenton (20-01) | 21F15801   | 01  |
| 21F15833     | 24.0 % | Dan Miggins | 21-OSU-04   | 0.00  | 0.00  | 1.28    | Oregon\Swenton (20-01) | 21F15801   | 01  |
| 21F15835     | 24.0 % | Dan Miggins | 21-OSU-04   | 0.00  | 0.00  | 1.28    | Oregon\Swenton (20-01) | 21F15801   | 01  |
| 21F15836     | 24.0 % | Dan Miggins | 21-OSU-04   | 0.00  | 0.00  | 1.28    | Oregon\Swenton (20-01) | 21F15801   | 01  |
| 21F15838     | 24.0 % | Dan Miggins | 21-OSU-04   | 0.00  | 0.00  | 1.28    | Oregon\Swenton (20-01) | 21F15801   | 01  |
| 21F15841     | 24.0 % | Dan Miggins | 21-OSU-04   | 0.00  | 0.00  | 1.28    | Oregon\Swenton (20-01) | 21F15801   | 01  |
| 21F15842     | 24.0 % | Dan Miggins | 21-OSU-04   | 0.00  | 0.00  | 1.28    | Oregon\Swenton (20-01) | 21F15801   | 01  |
| 21F15844     | 24.0 % | Dan Miggins | 21-OSU-04   | 0.00  | 0.00  | 1.28    | Oregon\Swenton (20-01) | 21F15801   | 01  |
| 21F15845     | 24.0 % | Dan Miggins | 21-OSU-04   | 0.00  | 0.00  | 1.28    | Oregon\Swenton (20-01) | 21F15801   | 01  |
| 21F15847     | 24.0 % | Dan Miggins | 21-OSU-04   | 0.00  | 0.00  | 1.28    | Oregon\Swenton (20-01) | 21F15801   | 01  |
| 21F15848     | 24.0 % | Dan Miggins | 21-OSU-04   | 0.00  | 0.00  | 1.28    | Oregon\Swenton (20-01) | 21F15801   | 01  |



| Sample Parameters |        | Sample   | Material | Location             | Standard Name   | Standard (in Ma) | %1σ   | Standard Reference  | Standard 40Ar/39Ar | %1σ   | J          | %1σ   | Air 40Ar/36Ar | %1σ   | MDF (lin) | %1σ   | Volume Ratio | Sensitivity (mol/volt) | Day | Month | Year | Hour | Min | Resist |
|-------------------|--------|----------|----------|----------------------|-----------------|------------------|-------|---------------------|--------------------|-------|------------|-------|---------------|-------|-----------|-------|--------------|------------------------|-----|-------|------|------|-----|--------|
| 21F15806          | 24.0 % | VS19-093 | Sanidine | Unidentified flow #2 | FCT-NM (4X2-21) | 28.201           | 0.082 | Kuiper et al (2008) | 9.38912            | 0.113 | 0.00165356 | 0.113 | 301.252       | 0.112 | 0.9977631 | 0.038 | 1            | 3.54E-14               | 27  | AUG   | 2021 | 13   | 38  | 1      |
| 21F15808          | 24.0 % | VS19-093 | Sanidine | Unidentified flow #2 | FCT-NM (4X2-21) | 28.201           | 0.082 | Kuiper et al (2008) | 9.38912            | 0.113 | 0.00165356 | 0.113 | 301.252       | 0.112 | 0.9977631 | 0.038 | 1            | 3.54E-14               | 27  | AUG   | 2021 | 13   | 55  | 1      |
| 21F15809          | 24.0 % | VS19-093 | Sanidine | Unidentified flow #2 | FCT-NM (4X2-21) | 28.201           | 0.082 | Kuiper et al (2008) | 9.38912            | 0.113 | 0.00165356 | 0.113 | 301.252       | 0.112 | 0.9977631 | 0.038 | 1            | 3.54E-14               | 27  | AUG   | 2021 | 14   | 4   | 1      |
| 21F15811          | 24.0 % | VS19-093 | Sanidine | Unidentified flow #2 | FCT-NM (4X2-21) | 28.201           | 0.082 | Kuiper et al (2008) | 9.38912            | 0.113 | 0.00165356 | 0.113 | 301.252       | 0.112 | 0.9977631 | 0.038 | 1            | 3.54E-14               | 27  | AUG   | 2021 | 14   | 21  | 1      |
| 21F15812          | 24.0 % | VS19-093 | Sanidine | Unidentified flow #2 | FCT-NM (4X2-21) | 28.201           | 0.082 | Kuiper et al (2008) | 9.38912            | 0.113 | 0.00165356 | 0.113 | 301.252       | 0.112 | 0.9977631 | 0.038 | 1            | 3.54E-14               | 27  | AUG   | 2021 | 14   | 30  | 1      |
| 21F15814          | 24.0 % | VS19-093 | Sanidine | Unidentified flow #2 | FCT-NM (4X2-21) | 28.201           | 0.082 | Kuiper et al (2008) | 9.38912            | 0.113 | 0.00165356 | 0.113 | 301.252       | 0.112 | 0.9977631 | 0.038 | 1            | 3.54E-14               | 27  | AUG   | 2021 | 14   | 47  | 1      |
| 21F15815          | 24.0 % | VS19-093 | Sanidine | Unidentified flow #2 | FCT-NM (4X2-21) | 28.201           | 0.082 | Kuiper et al (2008) | 9.38912            | 0.113 | 0.00165356 | 0.113 | 301.252       | 0.112 | 0.9977631 | 0.038 | 1            | 3.54E-14               | 27  | AUG   | 2021 | 14   | 56  | 1      |
| 21F15817          | 24.0 % | VS19-093 | Sanidine | Unidentified flow #2 | FCT-NM (4X2-21) | 28.201           | 0.082 | Kuiper et al (2008) | 9.38912            | 0.113 | 0.00165356 | 0.113 | 301.252       | 0.112 | 0.9977631 | 0.038 | 1            | 3.54E-14               | 27  | AUG   | 2021 | 15   | 13  | 1      |
| 21F15820          | 24.0 % | VS19-093 | Sanidine | Unidentified flow #2 | FCT-NM (4X2-21) | 28.201           | 0.082 | Kuiper et al (2008) | 9.38912            | 0.113 | 0.00165356 | 0.113 | 301.252       | 0.112 | 0.9977631 | 0.038 | 1            | 3.54E-14               | 27  | AUG   | 2021 | 15   | 39  | 1      |
| 21F15821          | 24.0 % | VS19-093 | Sanidine | Unidentified flow #2 | FCT-NM (4X2-21) | 28.201           | 0.082 | Kuiper et al (2008) | 9.38912            | 0.113 | 0.00165356 | 0.113 | 301.252       | 0.112 | 0.9977631 | 0.038 | 1            | 3.54E-14               | 27  | AUG   | 2021 | 15   | 48  | 1      |
| 21F15823          | 24.0 % | VS19-093 | Sanidine | Unidentified flow #2 | FCT-NM (4X2-21) | 28.201           | 0.082 | Kuiper et al (2008) | 9.38912            | 0.113 | 0.00165356 | 0.113 | 301.252       | 0.112 | 0.9977631 | 0.038 | 1            | 3.54E-14               | 27  | AUG   | 2021 | 16   | 5   | 1      |
| 21F15824          | 24.0 % | VS19-093 | Sanidine | Unidentified flow #2 | FCT-NM (4X2-21) | 28.201           | 0.082 | Kuiper et al (2008) | 9.38912            | 0.113 | 0.00165356 | 0.113 | 301.252       | 0.112 | 0.9977631 | 0.038 | 1            | 3.54E-14               | 27  | AUG   | 2021 | 16   | 13  | 1      |
| 21F15826          | 24.0 % | VS19-093 | Sanidine | Unidentified flow #2 | FCT-NM (4X2-21) | 28.201           | 0.082 | Kuiper et al (2008) | 9.38912            | 0.113 | 0.00165356 | 0.113 | 301.252       | 0.112 | 0.9977631 | 0.038 | 1            | 3.54E-14               | 27  | AUG   | 2021 | 16   | 31  | 1      |
| 21F15827          | 24.0 % | VS19-093 | Sanidine | Unidentified flow #2 | FCT-NM (4X2-21) | 28.201           | 0.082 | Kuiper et al (2008) | 9.38912            | 0.113 | 0.00165356 | 0.113 | 301.252       | 0.112 | 0.9977631 | 0.038 | 1            | 3.54E-14               | 27  | AUG   | 2021 | 16   | 39  | 1      |
| 21F15829          | 24.0 % | VS19-093 | Sanidine | Unidentified flow #2 | FCT-NM (4X2-21) | 28.201           | 0.082 | Kuiper et al (2008) | 9.38912            | 0.113 | 0.00165356 | 0.113 | 301.252       | 0.112 | 0.9977631 | 0.038 | 1            | 3.54E-14               | 27  | AUG   | 2021 | 16   | 56  | 1      |
| 21F15830          | 24.0 % | VS19-093 | Sanidine | Unidentified flow #2 | FCT-NM (4X2-21) | 28.201           | 0.082 | Kuiper et al (2008) | 9.38912            | 0.113 | 0.00165356 | 0.113 | 301.252       | 0.112 | 0.9977631 | 0.038 | 1            | 3.54E-14               | 27  | AUG   | 2021 | 17   | 5   | 1      |
| 21F15832          | 24.0 % | VS19-093 | Sanidine | Unidentified flow #2 | FCT-NM (4X2-21) | 28.201           | 0.082 | Kuiper et al (2008) | 9.38912            | 0.113 | 0.00165356 | 0.113 | 301.252       | 0.112 | 0.9977631 | 0.038 | 1            | 3.54E-14               | 27  | AUG   | 2021 | 17   | 22  | 1      |
| 21F15833          | 24.0 % | VS19-093 | Sanidine | Unidentified flow #2 | FCT-NM (4X2-21) | 28.201           | 0.082 | Kuiper et al (2008) | 9.38912            | 0.113 | 0.00165356 | 0.113 | 301.252       | 0.112 | 0.9977631 | 0.038 | 1            | 3.54E-14               | 27  | AUG   | 2021 | 17   | 31  | 1      |
| 21F15835          | 24.0 % | VS19-093 | Sanidine | Unidentified flow #2 | FCT-NM (4X2-21) | 28.201           | 0.082 | Kuiper et al (2008) | 9.38912            | 0.113 | 0.00165356 | 0.113 | 301.252       | 0.112 | 0.9977631 | 0.038 | 1            | 3.54E-14               | 27  | AUG   | 2021 | 17   | 48  | 1      |
| 21F15836          | 24.0 % | VS19-093 | Sanidine | Unidentified flow #2 | FCT-NM (4X2-21) | 28.201           | 0.082 | Kuiper et al (2008) | 9.38912            | 0.113 | 0.00165356 | 0.113 | 301.252       | 0.112 | 0.9977631 | 0.038 | 1            | 3.54E-14               | 27  | AUG   | 2021 | 17   | 57  | 1      |
| 21F15838          | 24.0 % | VS19-093 | Sanidine | Unidentified flow #2 | FCT-NM (4X2-21) | 28.201           | 0.082 | Kuiper et al (2008) | 9.38912            | 0.113 | 0.00165356 | 0.113 | 301.252       | 0.112 | 0.9977631 | 0.038 | 1            | 3.54E-14               | 27  | AUG   | 2021 | 18   | 14  | 1      |
| 21F15841          | 24.0 % | VS19-093 | Sanidine | Unidentified flow #2 | FCT-NM (4X2-21) | 28.201           | 0.082 | Kuiper et al (2008) | 9.38912            | 0.113 | 0.00165356 | 0.113 | 301.252       | 0.112 | 0.9977631 | 0.038 | 1            | 3.54E-14               | 27  | AUG   | 2021 | 18   | 40  | 1      |
| 21F15842          | 24.0 % | VS19-093 | Sanidine | Unidentified flow #2 | FCT-NM (4X2-21) | 28.201           | 0.082 | Kuiper et al (2008) | 9.38912            | 0.113 | 0.00165356 | 0.113 | 301.252       | 0.112 | 0.9977631 | 0.038 | 1            | 3.54E-14               | 27  | AUG   | 2021 | 18   | 49  | 1      |
| 21F15844          | 24.0 % | VS19-093 | Sanidine | Unidentified flow #2 | FCT-NM (4X2-21) | 28.201           | 0.082 | Kuiper et al (2008) | 9.38912            | 0.113 | 0.00165356 | 0.113 | 301.252       | 0.112 | 0.9977631 | 0.038 | 1            | 3.54E-14               | 27  | AUG   | 2021 | 19   | 6   | 1      |
| 21F15845          | 24.0 % | VS19-093 | Sanidine | Unidentified flow #2 | FCT-NM (4X2-21) | 28.201           | 0.082 | Kuiper et al (2008) | 9.38912            | 0.113 | 0.00165356 | 0.113 | 301.252       | 0.112 | 0.9977631 | 0.038 | 1            | 3.54E-14               | 27  | AUG   | 2021 | 19   | 14  | 1      |
| 21F15847          | 24.0 % | VS19-093 | Sanidine | Unidentified flow #2 | FCT-NM (4X2-21) | 28.201           | 0.082 | Kuiper et al (2008) | 9.38912            | 0.113 | 0.00165356 | 0.113 | 301.252       | 0.112 | 0.9977631 | 0.038 | 1            | 3.54E-14               | 27  | AUG   | 2021 | 19   | 32  | 1      |
| 21F15848          | 24.0 % | VS19-093 | Sanidine | Unidentified flow #2 | FCT-NM (4X2-21) | 28.201           | 0.082 | Kuiper et al (2008) | 9.38912            | 0.113 | 0.00165356 | 0.113 | 301.252       | 0.112 | 0.9977631 | 0.038 | 1            | 3.54E-14               | 27  | AUG   | 2021 | 19   | 40  | 1      |

| Irradiation<br>Constants |        | Irradiation Constants |       |          |     |          |       |          |     |           |      |           |      |           |      |          |      |          |      |           |     |      |     |      |     |       |     |
|--------------------------|--------|-----------------------|-------|----------|-----|----------|-------|----------|-----|-----------|------|-----------|------|-----------|------|----------|------|----------|------|-----------|-----|------|-----|------|-----|-------|-----|
|                          |        | 40/36(a)              | %1σ   | 40/36(c) | %1σ | 38/36(a) | %1σ   | 38/36(c) | %1σ | 39/37(ca) | %1σ  | 38/37(ca) | %1σ  | 36/37(ca) | %1σ  | 40/39(k) | %1σ  | 38/39(k) | %1σ  | 36/38(cl) | %1σ | K/Ca | %1σ | K/Cl | %1σ | Ca/Cl | %1σ |
| 21F15806                 | 24.0 % | 298.56                | 0.104 | 0.018    | 35  | 0.1885   | 0.159 | 1.493    | 3   | 0.000643  | 0.92 | 0.00018   | 9.63 | 0.00027   | 0.17 | 0.000607 | 9.65 | 0.012077 | 0.09 | 0         | 0   | 0.43 | 0   | 0    | 0   | 0     | 0   |
| 21F15808                 | 24.0 % | 298.56                | 0.104 | 0.018    | 35  | 0.1885   | 0.159 | 1.493    | 3   | 0.000643  | 0.92 | 0.00018   | 9.63 | 0.00027   | 0.17 | 0.000607 | 9.65 | 0.012077 | 0.09 | 0         | 0   | 0.43 | 0   | 0    | 0   | 0     | 0   |
| 21F15809                 | 24.0 % | 298.56                | 0.104 | 0.018    | 35  | 0.1885   | 0.159 | 1.493    | 3   | 0.000643  | 0.92 | 0.00018   | 9.63 | 0.00027   | 0.17 | 0.000607 | 9.65 | 0.012077 | 0.09 | 0         | 0   | 0.43 | 0   | 0    | 0   | 0     | 0   |
| 21F15811                 | 24.0 % | 298.56                | 0.104 | 0.018    | 35  | 0.1885   | 0.159 | 1.493    | 3   | 0.000643  | 0.92 | 0.00018   | 9.63 | 0.00027   | 0.17 | 0.000607 | 9.65 | 0.012077 | 0.09 | 0         | 0   | 0.43 | 0   | 0    | 0   | 0     | 0   |
| 21F15812                 | 24.0 % | 298.56                | 0.104 | 0.018    | 35  | 0.1885   | 0.159 | 1.493    | 3   | 0.000643  | 0.92 | 0.00018   | 9.63 | 0.00027   | 0.17 | 0.000607 | 9.65 | 0.012077 | 0.09 | 0         | 0   | 0.43 | 0   | 0    | 0   | 0     | 0   |
| 21F15814                 | 24.0 % | 298.56                | 0.104 | 0.018    | 35  | 0.1885   | 0.159 | 1.493    | 3   | 0.000643  | 0.92 | 0.00018   | 9.63 | 0.00027   | 0.17 | 0.000607 | 9.65 | 0.012077 | 0.09 | 0         | 0   | 0.43 | 0   | 0    | 0   | 0     | 0   |
| 21F15815                 | 24.0 % | 298.56                | 0.104 | 0.018    | 35  | 0.1885   | 0.159 | 1.493    | 3   | 0.000643  | 0.92 | 0.00018   | 9.63 | 0.00027   | 0.17 | 0.000607 | 9.65 | 0.012077 | 0.09 | 0         | 0   | 0.43 | 0   | 0    | 0   | 0     | 0   |
| 21F15817                 | 24.0 % | 298.56                | 0.104 | 0.018    | 35  | 0.1885   | 0.159 | 1.493    | 3   | 0.000643  | 0.92 | 0.00018   | 9.63 | 0.00027   | 0.17 | 0.000607 | 9.65 | 0.012077 | 0.09 | 0         | 0   | 0.43 | 0   | 0    | 0   | 0     | 0   |
| 21F15820                 | 24.0 % | 298.56                | 0.104 | 0.018    | 35  | 0.1885   | 0.159 | 1.493    | 3   | 0.000643  | 0.92 | 0.00018   | 9.63 | 0.00027   | 0.17 | 0.000607 | 9.65 | 0.012077 | 0.09 | 0         | 0   | 0.43 | 0   | 0    | 0   | 0     | 0   |
| 21F15821                 | 24.0 % | 298.56                | 0.104 | 0.018    | 35  | 0.1885   | 0.159 | 1.493    | 3   | 0.000643  | 0.92 | 0.00018   | 9.63 | 0.00027   | 0.17 | 0.000607 | 9.65 | 0.012077 | 0.09 | 0         | 0   | 0.43 | 0   | 0    | 0   | 0     | 0   |
| 21F15823                 | 24.0 % | 298.56                | 0.104 | 0.018    | 35  | 0.1885   | 0.159 | 1.493    | 3   | 0.000643  | 0.92 | 0.00018   | 9.63 | 0.00027   | 0.17 | 0.000607 | 9.65 | 0.012077 | 0.09 | 0         | 0   | 0.43 | 0   | 0    | 0   | 0     | 0   |
| 21F15824                 | 24.0 % | 298.56                | 0.104 | 0.018    | 35  | 0.1885   | 0.159 | 1.493    | 3   | 0.000643  | 0.92 | 0.00018   | 9.63 | 0.00027   | 0.17 | 0.000607 | 9.65 | 0.012077 | 0.09 | 0         | 0   | 0.43 | 0   | 0    | 0   | 0     | 0   |
| 21F15826                 | 24.0 % | 298.56                | 0.104 | 0.018    | 35  | 0.1885   | 0.159 | 1.493    | 3   | 0.000643  | 0.92 | 0.00018   | 9.63 | 0.00027   | 0.17 | 0.000607 | 9.65 | 0.012077 | 0.09 | 0         | 0   | 0.43 | 0   | 0    | 0   | 0     | 0   |
| 21F15827                 | 24.0 % | 298.56                | 0.104 | 0.018    | 35  | 0.1885   | 0.159 | 1.493    | 3   | 0.000643  | 0.92 | 0.00018   | 9.63 | 0.00027   | 0.17 | 0.000607 | 9.65 | 0.012077 | 0.09 | 0         | 0   | 0.43 | 0   | 0    | 0   | 0     | 0   |
| 21F15829                 | 24.0 % | 298.56                | 0.104 | 0.018    | 35  | 0.1885   | 0.159 | 1.493    | 3   | 0.000643  | 0.92 | 0.00018   | 9.63 | 0.00027   | 0.17 | 0.000607 | 9.65 | 0.012077 | 0.09 | 0         | 0   | 0.43 | 0   | 0    | 0   | 0     | 0   |
| 21F15830                 | 24.0 % | 298.56                | 0.104 | 0.018    | 35  | 0.1885   | 0.159 | 1.493    | 3   | 0.000643  | 0.92 | 0.00018   | 9.63 | 0.00027   | 0.17 | 0.000607 | 9.65 | 0.012077 | 0.09 | 0         | 0   | 0.43 | 0   | 0    | 0   | 0     | 0   |
| 21F15832                 | 24.0 % | 298.56                | 0.104 | 0.018    | 35  | 0.1885   | 0.159 | 1.493    | 3   | 0.000643  | 0.92 | 0.00018   | 9.63 | 0.00027   | 0.17 | 0.000607 | 9.65 | 0.012077 | 0.09 | 0         | 0   | 0.43 | 0   | 0    | 0   | 0     | 0   |
| 21F15833                 | 24.0 % | 298.56                | 0.104 | 0.018    | 35  | 0.1885   | 0.159 | 1.493    | 3   | 0.000643  | 0.92 | 0.00018   | 9.63 | 0.00027   | 0.17 | 0.000607 | 9.65 | 0.012077 | 0.09 | 0         | 0   | 0.43 | 0   | 0    | 0   | 0     | 0   |
| 21F15835                 | 24.0 % | 298.56                | 0.104 | 0.018    | 35  | 0.1885   | 0.159 | 1.493    | 3   | 0.000643  | 0.92 | 0.00018   | 9.63 | 0.00027   | 0.17 | 0.000607 | 9.65 | 0.012077 | 0.09 | 0         | 0   | 0.43 | 0   | 0    | 0   | 0     | 0   |
| 21F15836                 | 24.0 % | 298.56                | 0.104 | 0.018    | 35  | 0.1885   | 0.159 | 1.493    | 3   | 0.000643  | 0.92 | 0.00018   | 9.63 | 0.00027   | 0.17 | 0.000607 | 9.65 | 0.012077 | 0.09 | 0         | 0   | 0.43 | 0   | 0    | 0   | 0     | 0   |
| 21F15838                 | 24.0 % | 298.56                | 0.104 | 0.018    | 35  | 0.1885   | 0.159 | 1.493    | 3   | 0.000643  | 0.92 | 0.00018   | 9.63 | 0.00027   | 0.17 | 0.000607 | 9.65 | 0.012077 | 0.09 | 0         | 0   | 0.43 | 0   | 0    | 0   | 0     | 0   |
| 21F15841                 | 24.0 % | 298.56                | 0.104 | 0.018    | 35  | 0.1885   | 0.159 | 1.493    | 3   | 0.000643  | 0.92 | 0.00018   | 9.63 | 0.00027   | 0.17 | 0.000607 | 9.65 | 0.012077 | 0.09 | 0         | 0   | 0.43 | 0   | 0    | 0   | 0     | 0   |
| 21F15842                 | 24.0 % | 298.56                | 0.104 | 0.018    | 35  | 0.1885   | 0.159 | 1.493    | 3   | 0.000643  | 0.92 | 0.00018   | 9.63 | 0.00027   | 0.17 | 0.000607 | 9.65 | 0.012077 | 0.09 | 0         | 0   | 0.43 | 0   | 0    | 0   | 0     | 0   |
| 21F15844                 | 24.0 % | 298.56                | 0.104 | 0.018    | 35  | 0.1885   | 0.159 | 1.493    | 3   | 0.000643  | 0.92 | 0.00018   | 9.63 | 0.00027   | 0.17 | 0.000607 | 9.65 | 0.012077 | 0.09 | 0         | 0   | 0.43 | 0   | 0    | 0   | 0     | 0   |
| 21F15845                 | 24.0 % | 298.56                | 0.104 | 0.018    | 35  | 0.1885   | 0.159 | 1.493    | 3   | 0.000643  | 0.92 | 0.00018   | 9.63 | 0.00027   | 0.17 | 0.000607 | 9.65 | 0.012077 | 0.09 | 0         | 0   | 0.43 | 0   | 0    | 0   | 0     | 0   |
| 21F15847                 | 24.0 % | 298.56                | 0.104 | 0.018    | 35  | 0.1885   | 0.159 | 1.493    | 3   | 0.000643  | 0.92 | 0.00018   | 9.63 | 0.00027   | 0.17 | 0.000607 | 9.65 | 0.012077 | 0.09 | 0         | 0   | 0.43 | 0   | 0    | 0   | 0     | 0   |
| 21F15848                 | 24.0 % | 298.56                | 0.104 | 0.018    | 35  | 0.1885   | 0.159 | 1.493    | 3   | 0.000643  | 0.92 | 0.00018   | 9.63 | 0.00027   | 0.17 | 0.000607 | 9.65 | 0.012077 | 0.09 | 0         | 0   | 0.43 | 0   | 0    | 0   | 0     | 0   |



21F15801.AGE >>> VS19-093 >>> OREGON | SWENTON (20-01) PROJECT

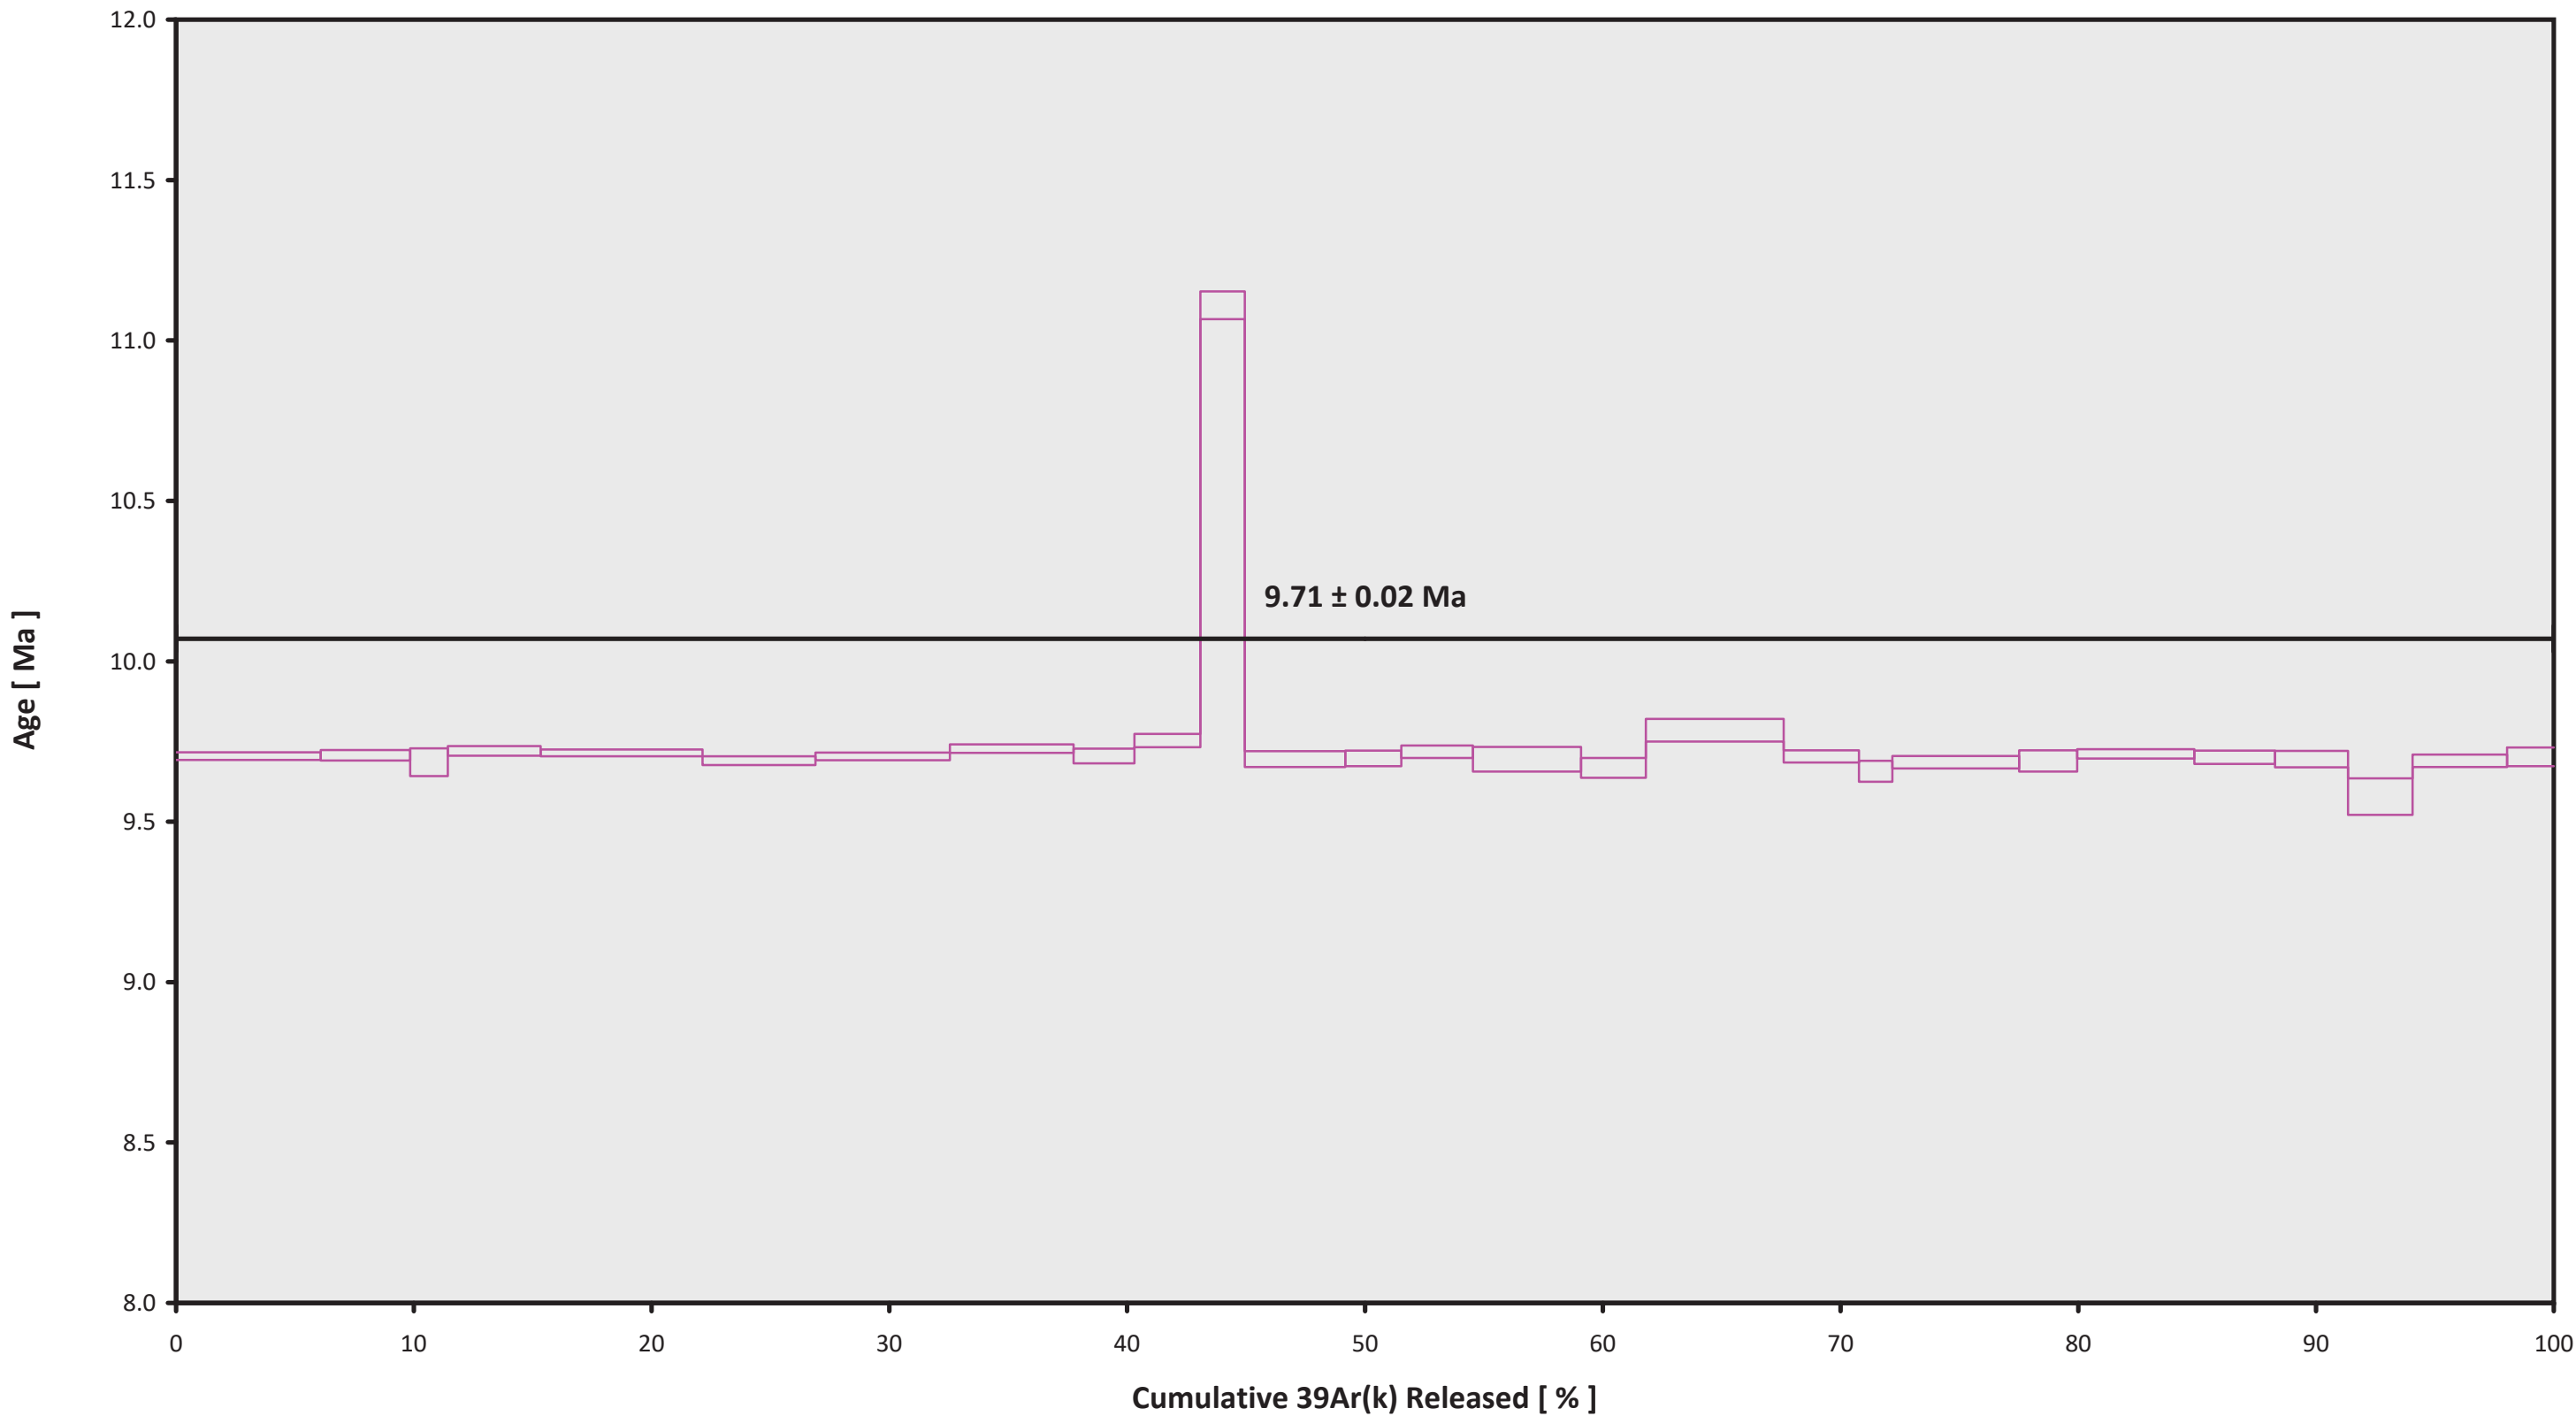

Ar-Ages in Ma

WEIGHTED PLATEAU

9.71 ± 0.02

TOTAL FUSION

9.73 ± 0.02

NORMAL ISOCHRON

9.72 ± 0.02

INVERSE ISOCHRON

9.71 ± 0.02

MSWD (PROBABILITY)

4.56 (0%)

ASSUMED TRAPPED  $^{40}\text{Ar}/^{36}\text{Ar}$  RATIO

Standard  $^{40}/^{36} = 298.56 \pm 0.104$  %SD

Sample Info

Sanidine

Unidentified flow #2

Dan Miggins

IRR = 21-OSU-04 (4X2-21)

J = 0.00165356 ± 0.00000187

21F15801.AGE >>> VS19-093 >>> OREGON | SWENTON (20-01) PROJECT

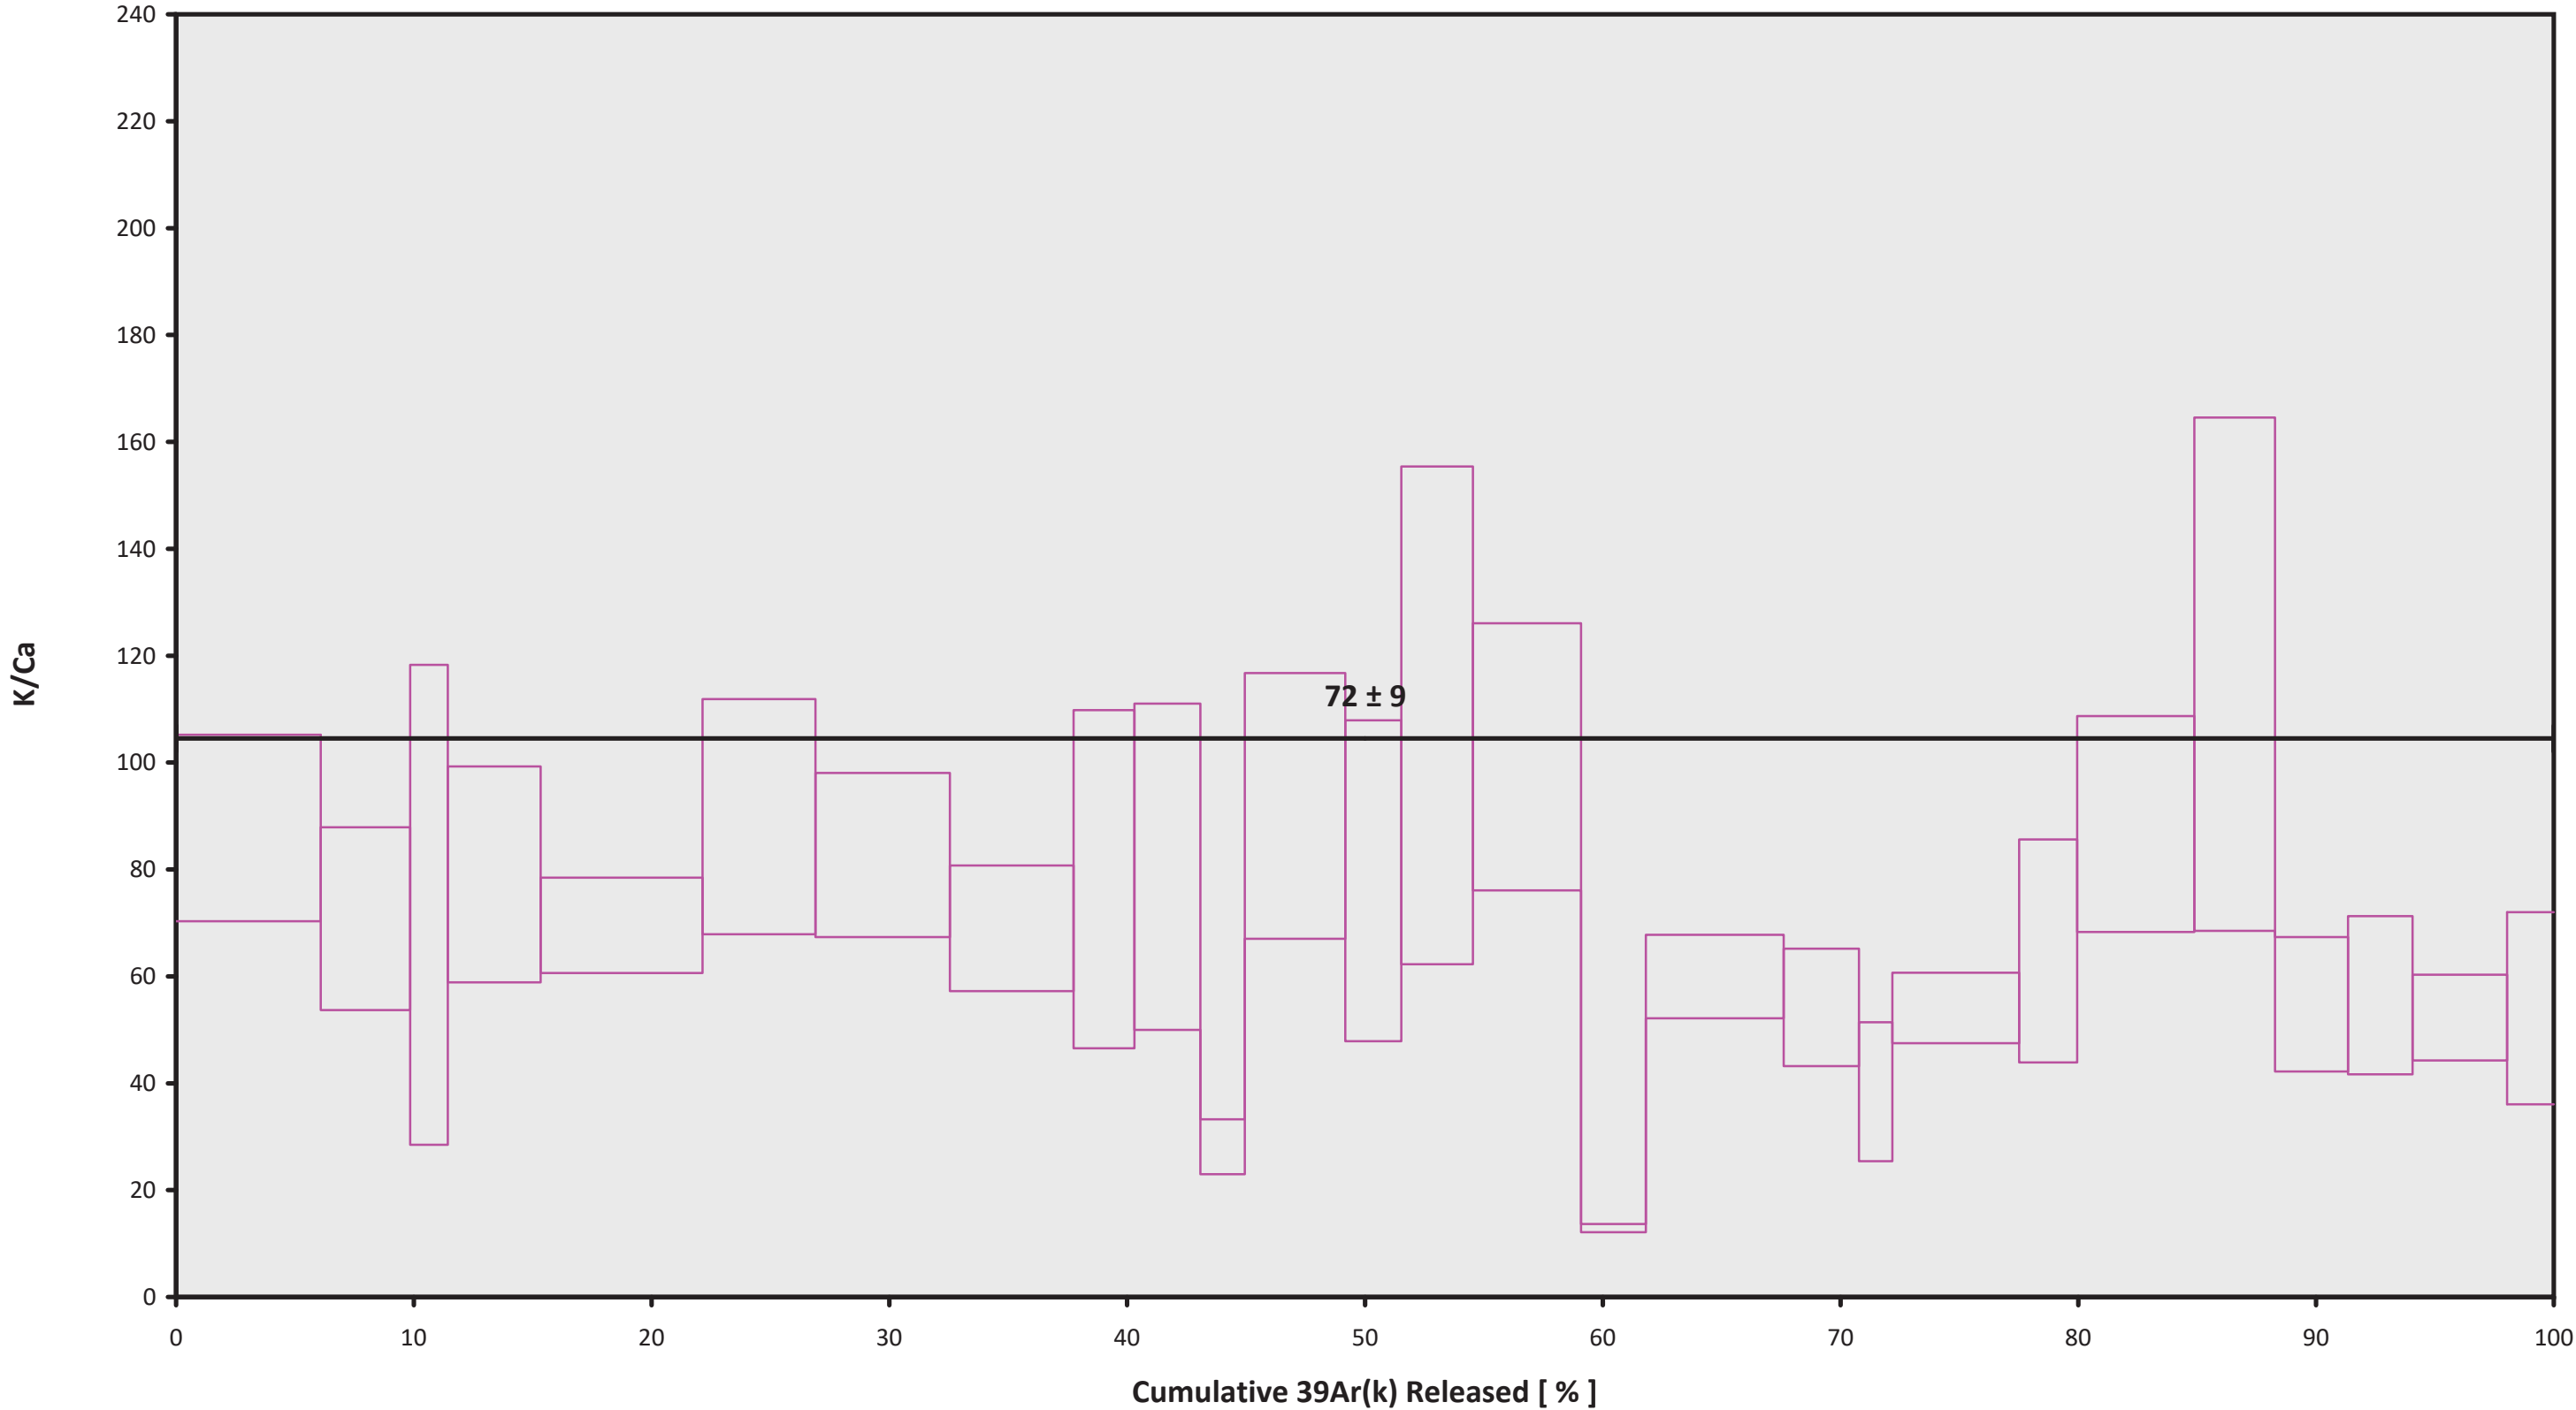

Ar-Ages in Ma

WEIGHTED PLATEAU

$9.71 \pm 0.02$

TOTAL FUSION

$9.73 \pm 0.02$

NORMAL ISOCHRON

$9.72 \pm 0.02$

INVERSE ISOCHRON

$9.71 \pm 0.02$

ASSUMED TRAPPED  $^{40}\text{Ar}/^{36}\text{Ar}$  RATIO

Standard  $40/36 = 298.56 \pm 0.104$  %SD

Sample Info

Sanidine

Unidentified flow #2

Dan Miggins

IRR = 21-OSU-04 (4X2-21)

J =  $0.00165356 \pm 0.00000187$

21F15801.AGE >>> VS19-093 >>> OREGON | SWENTON (20-01) PROJECT

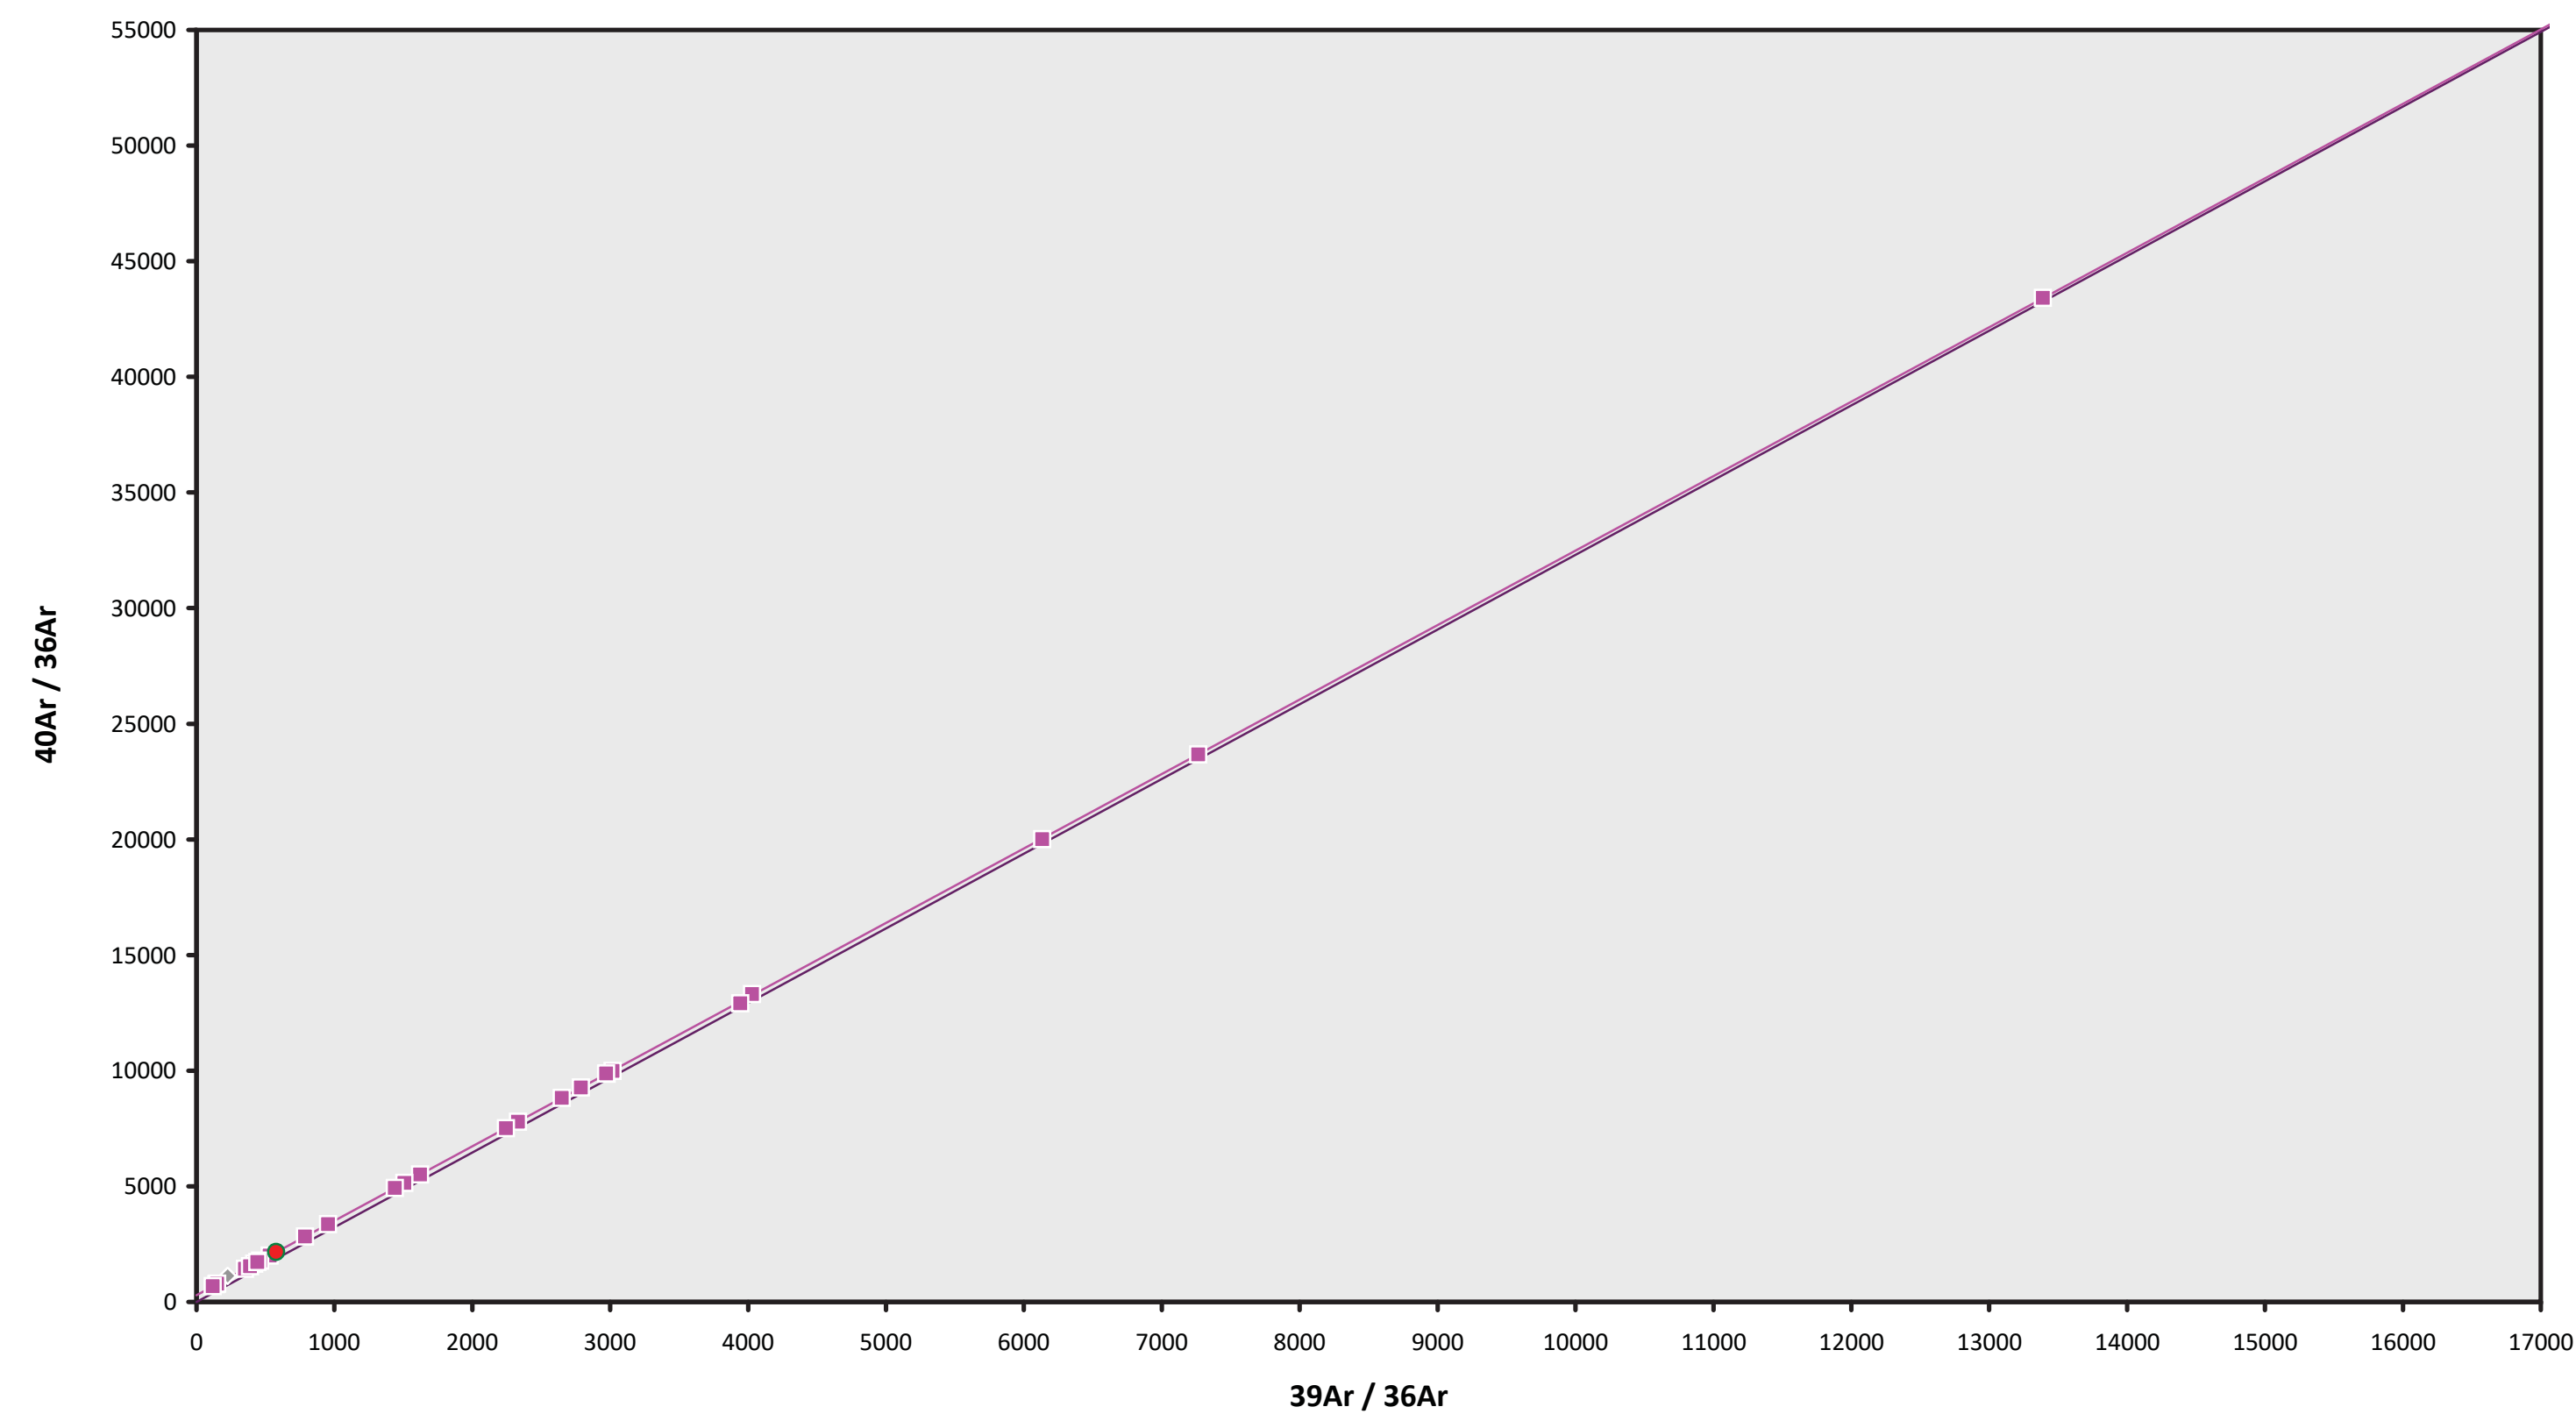

Ar-Ages in Ma

WEIGHTED PLATEAU

$9.71 \pm 0.02$

TOTAL FUSION

$9.73 \pm 0.02$

NORMAL ISOCHRON

$9.72 \pm 0.02$

INVERSE ISOCHRON

$9.71 \pm 0.02$

MSWD (PROBABILITY)

5.97 (0%)

CALCULATED 40AR/36AR INTERCEPT

$296.3 \pm 2.4$

Sample Info

Sanidine

Unidentified flow #2

Dan Miggins

IRR = 21-OSU-04 (4X2-21)

J =  $0.00165356 \pm 0.00000187$

21F15801.AGE >>> VS19-093 >>> OREGON | SWENTON (20-01) PROJECT

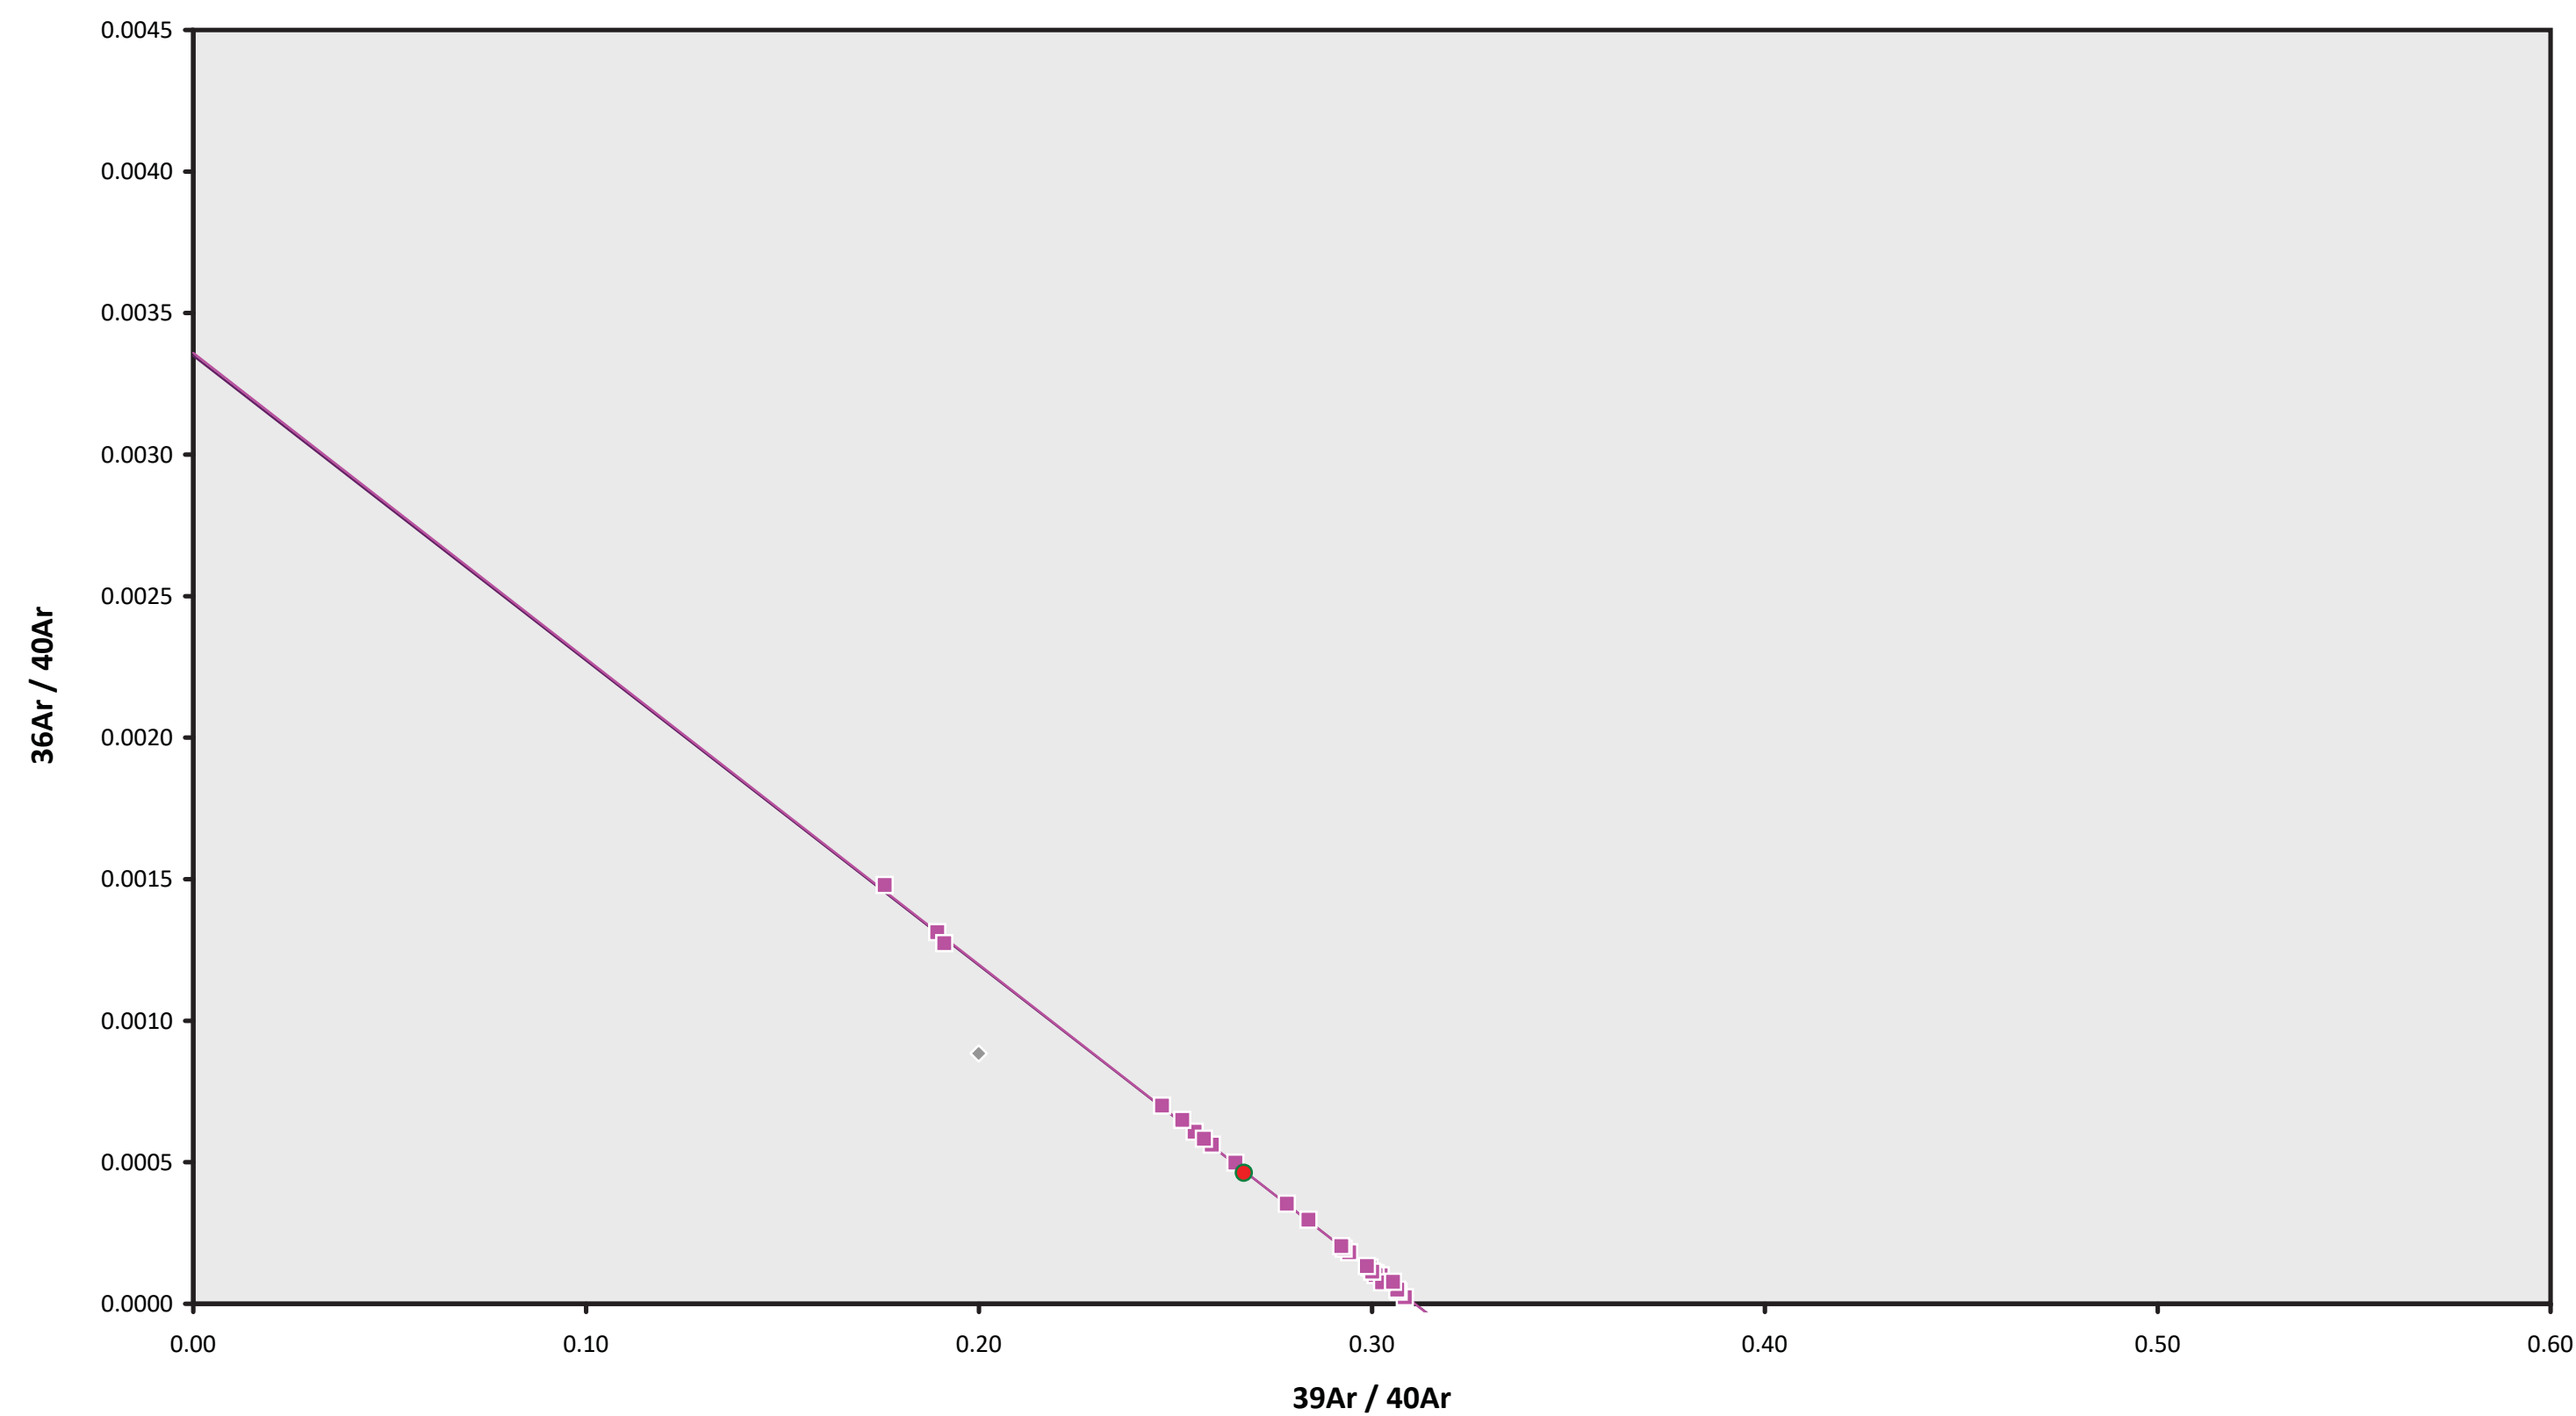

Ar-Ages in Ma

WEIGHTED PLATEAU

$9.71 \pm 0.02$

TOTAL FUSION

$9.73 \pm 0.02$

NORMAL ISOCHRON

$9.72 \pm 0.02$

INVERSE ISOCHRON

$9.71 \pm 0.02$

MSWD (PROBABILITY)

4.83 (0%)

SPREADING FACTOR

42.6%

CALCULATED  $^{40}\text{Ar}/^{36}\text{Ar}$  INTERCEPT

$297.7 \pm 2.1$

Sample Info

Sanidine

Unidentified flow #2

Dan Miggins

IRR = 21-OSU-04 (4X2-21)

$J = 0.00165356 \pm 0.00000187$

| Relative Abundances |        |   | 36Ar<br>[fA] | %1σ     | 37Ar<br>[fA] | %1σ     | 38Ar<br>[fA] | %1σ   | 39Ar<br>[fA] | %1σ   | 40Ar<br>[fA] | %1σ   | 40(r)/39(k) ± 2σ | Age ± 2σ<br>(Ma) | 40Ar(r)<br>(%) | 39Ar(k)<br>(%) | K/Ca ± 2σ    |
|---------------------|--------|---|--------------|---------|--------------|---------|--------------|-------|--------------|-------|--------------|-------|------------------|------------------|----------------|----------------|--------------|
| 20F23287            | 17.0 % | ✓ | 0.0108654    | 2.620   | 27.585117    | 0.576   | 0.657114     | 1.385 | 53.2868      | 0.048 | 203.8853     | 0.015 | 3.80776 ±0.00503 | 11.18 ±0.01      | 99.49          | 2.46           | 0.8 ±0.0     |
| 20F23288            | 17.0 % | ✓ | 0.0263828    | 1.372   | 22.976442    | 0.662   | 0.825030     | 1.061 | 67.8136      | 0.045 | 264.6369     | 0.011 | 3.81383 ±0.00478 | 11.20 ±0.01      | 97.71          | 3.14           | 1.3 ±0.0     |
| 20F23290            | 17.0 % | ✓ | 0.0234407    | 1.528   | 1.357462     | 8.263   | 1.653127     | 0.601 | 136.8625     | 0.042 | 529.1595     | 0.007 | 3.81544 ±0.00363 | 11.20 ±0.01      | 98.68          | 6.33           | 43.4 ±7.2    |
| 20F23291            | 17.0 % | ✓ | 0.1579356    | 0.418   | 2.546925     | 4.400   | 2.010223     | 0.487 | 164.4563     | 0.042 | 674.6102     | 0.007 | 3.81602 ±0.00408 | 11.20 ±0.01      | 93.03          | 7.61           | 27.8 ±2.4    |
| 20F23293            | 17.0 % | ✓ | 0.0665074    | 0.800   | 2.186415     | 5.263   | 2.494878     | 0.373 | 206.0037     | 0.041 | 805.4246     | 0.006 | 3.81364 ±0.00355 | 11.20 ±0.01      | 97.54          | 9.53           | 40.5 ±4.3    |
| 20F23294            | 17.0 % | ✓ | 0.0164626    | 1.873   | 21.667255    | 0.695   | 0.630692     | 1.495 | 51.7936      | 0.047 | 200.5997     | 0.013 | 3.81234 ±0.00517 | 11.19 ±0.02      | 98.41          | 2.39           | 1.0 ±0.0     |
| 20F23296            | 17.0 % | ✓ | 0.0091403    | 3.490   | 1.436147     | 7.992   | 1.019932     | 0.969 | 84.0593      | 0.043 | 323.1864     | 0.010 | 3.81310 ±0.00409 | 11.19 ±0.01      | 99.18          | 3.89           | 25.2 ±4.0    |
| 20F23297            | 17.0 % | ✓ | 0.0149397    | 2.227   | 1.541279     | 7.149   | 1.943212     | 0.521 | 161.5341     | 0.042 | 621.1320     | 0.007 | 3.81778 ±0.00348 | 11.21 ±0.01      | 99.29          | 7.47           | 45.1 ±6.4    |
| 20F23299            | 17.0 % | ✓ | 0.0042570    | 6.049   | 0.398734     | 28.016  | 0.609157     | 1.506 | 51.2554      | 0.047 | 197.4704     | 0.013 | 3.82792 ±0.00478 | 11.24 ±0.01      | 99.36          | 2.37           | 55.3 ±31.0   |
| 20F23300            | 17.0 % | ✓ | 0.0168061    | 2.053   | 1.130183     | 10.529  | 1.019803     | 0.894 | 84.0532      | 0.044 | 325.7851     | 0.010 | 3.81676 ±0.00422 | 11.20 ±0.01      | 98.47          | 3.89           | 32.0 ±6.7    |
| 20F23302            | 17.0 % | ✓ | 0.0161825    | 1.937   | 0.972457     | 11.099  | 1.310836     | 0.719 | 109.9172     | 0.043 | 424.6115     | 0.009 | 3.81919 ±0.00374 | 11.21 ±0.01      | 98.86          | 5.08           | 48.6 ±10.8   |
| 20F23303            | 17.0 % | ✓ | 0.0040463    | 7.369   | 0.941625     | 12.196  | 0.998258     | 0.888 | 83.6030      | 0.043 | 320.4832     | 0.010 | 3.81927 ±0.00401 | 11.21 ±0.01      | 99.63          | 3.87           | 38.2 ±9.3    |
| 20F23305            | 17.0 % | ✓ | 0.0104781    | 3.096   | 0.984156     | 11.988  | 1.035066     | 0.900 | 86.9414      | 0.044 | 335.3400     | 0.010 | 3.82143 ±0.00413 | 11.22 ±0.01      | 99.08          | 4.02           | 38.0 ±9.1    |
| 20F23306            | 17.0 % | ✓ | 0.0263820    | 1.426   | 1.159099     | 10.114  | 1.105540     | 0.802 | 91.1662      | 0.044 | 356.2495     | 0.009 | 3.82175 ±0.00421 | 11.22 ±0.01      | 97.80          | 4.22           | 33.8 ±6.8    |
| 20F23308            | 17.0 % | ✓ | 0.0124386    | 2.376   | 1.542287     | 7.584   | 1.099720     | 0.871 | 90.7691      | 0.043 | 350.6236     | 0.009 | 3.82270 ±0.00390 | 11.22 ±0.01      | 98.96          | 4.20           | 25.3 ±3.8    |
| 20F23309            | 17.0 % | ✓ | 0.0085903    | 3.774   | 1.562298     | 7.421   | 1.963525     | 0.505 | 163.4669     | 0.042 | 626.3168     | 0.006 | 3.81596 ±0.00344 | 11.20 ±0.01      | 99.59          | 7.56           | 45.0 ±6.7    |
| 20F23311            | 17.0 % |   | 0.0023279    | 12.110  | 0.599730     | 19.998  | 0.667640     | 1.409 | 55.7125      | 0.047 | 214.1908     | 0.014 | 3.83239 ±0.00483 | 11.25 ±0.01      | 99.68          | 2.58           | 39.9 ±16.0   |
| 20F23312            | 17.0 % | ✓ | 0.0037178    | 7.967   | 0.982183     | 11.504  | 1.050769     | 0.876 | 87.6252      | 0.043 | 335.6133     | 0.011 | 3.81776 ±0.00397 | 11.21 ±0.01      | 99.68          | 4.05           | 38.4 ±8.8    |
| 20F23314            | 17.0 % | ✓ | 0.0046941    | 6.142   | 1.382693     | 8.714   | 0.670767     | 1.440 | 56.4377      | 0.047 | 216.7595     | 0.014 | 3.81728 ±0.00486 | 11.21 ±0.01      | 99.39          | 2.61           | 17.6 ±3.1    |
| 20F23315            | 17.0 % |   | 0.0215424    | 1.610   | 0.109546     | 105.311 | 0.367871     | 2.549 | 30.8500      | 0.055 | 124.7668     | 0.020 | 3.83551 ±0.00813 | 11.26 ±0.02      | 94.84          | 1.43           | 121.1 ±255.1 |
| 20F23317            | 17.0 % | ✓ | 0.1120140    | 0.525   | 1.233948     | 9.539   | 1.258322     | 0.736 | 101.8232     | 0.043 | 422.3482     | 0.008 | 3.81982 ±0.00489 | 11.21 ±0.01      | 92.09          | 4.71           | 35.5 ±6.8    |
| 20F23318            | 17.0 % |   | 0.0012815    | 19.803  | 0.149640     | 74.793  | 0.170773     | 4.912 | 14.4968      | 0.080 | 53.8663      | 0.045 | 3.74239 ±0.01257 | 10.99 ±0.04      | 100.72         | 0.67           | 41.7 ±62.3   |
| 20F23320            | 17.0 % | ✓ | 0.0011476    | 21.683  | 0.286381     | 38.707  | 0.317377     | 2.761 | 27.2797      | 0.057 | 104.3501     | 0.024 | 3.81290 ±0.00727 | 11.19 ±0.02      | 99.68          | 1.26           | 41.0 ±31.7   |
| 20F23321            | 17.0 % |   | 0.0004151    | 57.406  | 0.107324     | 101.625 | 0.099337     | 8.844 | 8.7993       | 0.115 | 33.0228      | 0.067 | 3.76739 ±0.01912 | 11.06 ±0.06      | 100.39         | 0.41           | 35.3 ±71.7   |
| 20F23323            | 17.0 % |   | 0.0047915    | 5.832   | 0.455400     | 22.499  | 0.413750     | 2.080 | 34.6964      | 0.052 | 132.5873     | 0.021 | 3.78061 ±0.00644 | 11.10 ±0.02      | 98.93          | 1.60           | 32.8 ±14.7   |
| 20F23324            | 17.0 % |   | 0.0001212    | 197.783 | 0.161416     | 65.204  | 0.100969     | 8.894 | 9.3191       | 0.111 | 35.7461      | 0.068 | 3.84050 ±0.01840 | 11.27 ±0.05      | 100.12         | 0.43           | 24.8 ±32.4   |
| 20F23326            | 17.0 % | ✓ | 0.0027815    | 9.127   | 0.248166     | 43.816  | 0.341805     | 2.511 | 28.3922      | 0.054 | 109.3539     | 0.025 | 3.82241 ±0.00705 | 11.22 ±0.02      | 99.24          | 1.31           | 49.2 ±43.1   |
| 20F23327            | 17.0 % | ✓ | 0.0002042    | 120.671 | 0.310517     | 35.248  | 0.239400     | 3.719 | 19.7394      | 0.066 | 75.4183      | 0.035 | 3.82449 ±0.00945 | 11.23 ±0.03      | 100.10         | 0.91           | 27.3 ±19.3   |

Σ 0.5758501 0.317 96.014823 0.652 26.074891 0.188 2162.1536 0.010 8417.5379 0.002

| Information on Analysis and Constants Used in Calculations                                                                                                                                                                                                                                                                                                                                                                                                                                                                                                                                                                                                                                                                                                                                                                                         |                                                                                                                                                                                                                                                                                                                                                                                                                                                                                                                                                                                                                                                                                                                                                                                                                                                                            |
|----------------------------------------------------------------------------------------------------------------------------------------------------------------------------------------------------------------------------------------------------------------------------------------------------------------------------------------------------------------------------------------------------------------------------------------------------------------------------------------------------------------------------------------------------------------------------------------------------------------------------------------------------------------------------------------------------------------------------------------------------------------------------------------------------------------------------------------------------|----------------------------------------------------------------------------------------------------------------------------------------------------------------------------------------------------------------------------------------------------------------------------------------------------------------------------------------------------------------------------------------------------------------------------------------------------------------------------------------------------------------------------------------------------------------------------------------------------------------------------------------------------------------------------------------------------------------------------------------------------------------------------------------------------------------------------------------------------------------------------|
| Project = SWENTON (20-01)<br>Sample = VS19-098<br>Material = Sanidine<br>Location = Rhyolite Dome<br>Region = Eastern Oregon<br>Analyst = Dan Miggins<br>Irradiation = 20-OSU-01 (1C39-20)<br>Position = X: 0   Y: 0   Z/H: 48.54616 mm<br>FCT-NM Age = 28.201 ± 0.023 Ma<br>FCT-NM Reference = Kuiper et al (2008)<br>FCT-NM 40Ar/39Ar Ratio = 9.65100 ± 0.01477<br>FCT-NMJ-value = 0.00160869 ± 0.00000246<br>Air Shot 40Ar/36Ar = 298.8040 ± 0.3705<br>Air Shot MDF = 0.99979559 ± 0.00040479 (LIN)<br>Experiment Type = Total Fusion<br>Extraction Method = Single Crystal Laser Heating<br>Heating = 62 sec<br>Isolation = 1.62 min<br>Instrument = ARGUS-VI-F<br>Preferred Age = Ideogram Age<br>Age Classification = Eruption Age<br>IGSN = Undefined<br>Rock Class = Undefined<br>Lithology = Undefined<br>Lat-Lon = Undefined - Undefined | Age Equations = Min et al. (2000)<br>Negative Intensities = Allowed<br>Collector Calibrations = 36Ar<br>Decay 40K = 5.463 ± 0.107 E-10 1/a<br>Decay 39Ar = 2.940 ± 0.016 E-07 1/h<br>Decay 37Ar = 8.230 ± 0.012 E-04 1/h<br>Decay 36Cl = 2.257 ± 0.015 E-06 1/a<br>Decay 40K(EC,β <sup>+</sup> ) = 0.580 ± 0.014 E-10 1/a<br>Decay 40K(β <sup>-</sup> ) = 4.884 ± 0.099 E-10 1/a<br>Atmospheric 40/36(a) = 298.56 ± 0.31<br>Atmospheric 38/36(a) = 0.1885 ± 0.0003<br>Production 39/37(ca) = 0.0006425 ± 0.0000059<br>Production 38/37(ca) = 0.0001800 ± 0.0000173<br>Production 36/37(ca) = 0.0002703 ± 0.0000005<br>Production 40/39(k) = 0.000607 ± 0.000059<br>Production 38/39(k) = 0.012077 ± 0.000011<br>Production 36/38(cl) = 262.80 ± 1.71<br>Scaling Ratio K/Ca = 0.430<br>Abundance Ratio 40K/K = 1.1700 ± 0.0100 E-04<br>Atomic Weight K = 39.0983 ± 0.0001 g |

| Results                         | 40(a)/36(a) ± 2σ     | 40(r)/39(k) ± 2σ                                    | Age ± 2σ<br>(Ma)   | M <sub>SWD</sub>   | 39Ar(k)<br>(%,n)                            | K/Ca ± 2σ                   |
|---------------------------------|----------------------|-----------------------------------------------------|--------------------|--------------------|---------------------------------------------|-----------------------------|
| Age Plateau<br>Error Mean       |                      | 3.81749 ±0.00175 ±0.05%                             | 11.21 ±0.03 ±0.31% | 3.60<br>0%         | 92.88<br>22                                 | 1.0 ±0.1                    |
|                                 |                      | Full External Error ±0.58<br>Analytical Error ±0.01 |                    | 1.62<br>1.8963     | 2σ Confidence Limit<br>Error Magnification  |                             |
| Total Fusion Age                |                      | 3.81670 ±0.00092 ±0.02%                             | 11.20 ±0.03 ±0.31% |                    | 28                                          | 9.7 ±0.1                    |
|                                 |                      | Full External Error ±0.58<br>Analytical Error ±0.00 |                    |                    |                                             |                             |
| Normal Isochron<br>Error Chron  | 288.82 ±10.01 ±3.46% | 3.82227 ±0.00327 ±0.09%                             | 11.22 ±0.04 ±0.32% | 8.55<br>0%         | 92.88<br>22                                 | 1.63<br>2σ Confidence Limit |
|                                 |                      | Full External Error ±0.58<br>Analytical Error ±0.01 |                    | 2.9241<br>1        | Error Magnification<br>Number of Iterations |                             |
|                                 |                      |                                                     |                    | 0.0000001332       | Convergence                                 |                             |
| Inverse Isochron<br>Error Chron | 298.26 ±6.78 ±2.27%  | 3.81756 ±0.00231 ±0.06%                             | 11.21 ±0.03 ±0.31% | 3.78<br>0%         | 92.88<br>22                                 | 1.63<br>2σ Confidence Limit |
|                                 |                      | Full External Error ±0.58<br>Analytical Error ±0.01 |                    | 1.9439<br>2        | Error Magnification<br>Number of Iterations |                             |
|                                 |                      |                                                     |                    | 0.0003792871<br>8% | Convergence<br>Spreading Factor             |                             |

| Incremental Heating |        |   | 36Ar(a)<br>[fA] | 37Ar(ca)<br>[fA] | 38Ar(cl)<br>[fA] | 39Ar(k)<br>[fA] | 40Ar(r)<br>[fA] | Age ± 2σ<br>(Ma) | 40Ar(r)<br>(%) | 39Ar(k)<br>(%) | K/Ca ± 2σ    |
|---------------------|--------|---|-----------------|------------------|------------------|-----------------|-----------------|------------------|----------------|----------------|--------------|
| 20F23287            | 17.0 % | ✓ | 0.0034074       | 27.585117        | 0.0081760        | 53.2691         | 202.8356        | 11.18 ±0.01      | 99.49          | 2.46           | 0.8 ±0.0     |
| 20F23288            | 17.0 % | ✓ | 0.0201723       | 22.976442        | 0.0000000        | 67.7988         | 258.5731        | 11.20 ±0.01      | 97.71          | 3.14           | 1.3 ±0.0     |
| 20F23290            | 17.0 % | ✓ | 0.0230738       | 1.357462         | 0.0000000        | 136.8616        | 522.1875        | 11.20 ±0.01      | 98.68          | 6.33           | 43.4 ±7.2    |
| 20F23291            | 17.0 % | ✓ | 0.1572472       | 2.546925         | 0.0000000        | 164.4546        | 627.5627        | 11.20 ±0.01      | 93.03          | 7.61           | 27.8 ±2.4    |
| 20F23293            | 17.0 % | ✓ | 0.0659164       | 2.186415         | 0.0000000        | 206.0023        | 785.6196        | 11.20 ±0.01      | 97.54          | 9.53           | 40.5 ±4.3    |
| 20F23294            | 17.0 % | ✓ | 0.0106059       | 21.667255        | 0.0000000        | 51.7797         | 197.4018        | 11.19 ±0.02      | 98.41          | 2.39           | 1.0 ±0.0     |
| 20F23296            | 17.0 % | ✓ | 0.0087515       | 1.436147         | 0.0028516        | 84.0583         | 320.5225        | 11.19 ±0.01      | 99.18          | 3.89           | 25.2 ±4.0    |
| 20F23297            | 17.0 % | ✓ | 0.0145231       | 1.541279         | 0.0000000        | 161.5331        | 616.6979        | 11.21 ±0.01      | 99.29          | 7.47           | 45.1 ±6.4    |
| 20F23299            | 17.0 % | ✓ | 0.0041492       | 0.398734         | 0.0000000        | 51.2551         | 196.2005        | 11.24 ±0.01      | 99.36          | 2.37           | 55.3 ±31.0   |
| 20F23300            | 17.0 % | ✓ | 0.0165004       | 1.130183         | 0.0013877        | 84.0525         | 320.8078        | 11.20 ±0.01      | 98.47          | 3.89           | 32.0 ±6.7    |
| 20F23302            | 17.0 % | ✓ | 0.0159196       | 0.972457         | 0.0000000        | 109.9165        | 419.7918        | 11.21 ±0.01      | 98.86          | 5.08           | 48.6 ±10.8   |
| 20F23303            | 17.0 % | ✓ | 0.0037918       | 0.941625         | 0.0000000        | 83.6024         | 319.3004        | 11.21 ±0.01      | 99.63          | 3.87           | 38.2 ±9.3    |
| 20F23305            | 17.0 % | ✓ | 0.0102120       | 0.984156         | 0.0000000        | 86.9407         | 332.2383        | 11.22 ±0.01      | 99.08          | 4.02           | 38.0 ±9.1    |
| 20F23306            | 17.0 % | ✓ | 0.0260687       | 1.159099         | 0.0000000        | 91.1654         | 348.4111        | 11.22 ±0.01      | 97.80          | 4.22           | 33.8 ±6.8    |
| 20F23308            | 17.0 % | ✓ | 0.0120215       | 1.542287         | 0.0009698        | 90.7681         | 346.9793        | 11.22 ±0.01      | 98.96          | 4.20           | 25.3 ±3.8    |
| 20F23309            | 17.0 % | ✓ | 0.0081680       | 1.562298         | 0.0000000        | 163.4659        | 623.7789        | 11.20 ±0.01      | 99.59          | 7.56           | 45.0 ±6.7    |
| 20F23311            | 17.0 % |   | 0.0021657       | 0.599730         | 0.0000000        | 55.7121         | 213.5104        | 11.25 ±0.01      | 99.68          | 2.58           | 39.9 ±16.0   |
| 20F23312            | 17.0 % | ✓ | 0.0034523       | 0.982183         | 0.0000000        | 87.6246         | 334.5294        | 11.21 ±0.01      | 99.68          | 4.05           | 38.4 ±8.8    |
| 20F23314            | 17.0 % | ✓ | 0.0043204       | 1.382693         | 0.0000000        | 56.4368         | 215.4353        | 11.21 ±0.01      | 99.39          | 2.61           | 17.6 ±3.1    |
| 20F23315            | 17.0 % |   | 0.0215128       | 0.109546         | 0.0000000        | 30.8499         | 118.3252        | 11.26 ±0.02      | 94.84          | 1.43           | 121.1 ±255.1 |
| 20F23317            | 17.0 % | ✓ | 0.1116789       | 1.233948         | 0.0073392        | 101.8224        | 388.9435        | 11.21 ±0.01      | 92.09          | 4.71           | 35.5 ±6.8    |
| 20F23318            | 17.0 % |   | 0.0013220       | 0.149640         | 0.0000000        | 14.4967         | 54.2522         | 10.99 ±0.04      | 100.72         | 0.67           | 41.7 ±62.3   |
| 20F23320            | 17.0 % | ✓ | 0.0010702       | 0.286381         | 0.0000000        | 27.2795         | 104.0140        | 11.19 ±0.02      | 99.68          | 1.26           | 41.0 ±31.7   |
| 20F23321            | 17.0 % |   | 0.0004442       | 0.107324         | 0.0000000        | 8.7992          | 33.1501         | 11.06 ±0.06      | 100.39         | 0.41           | 35.3 ±71.7   |
| 20F23323            | 17.0 % |   | 0.0046684       | 0.455400         | 0.0000000        | 34.6961         | 131.1724        | 11.10 ±0.02      | 98.93          | 1.60           | 32.8 ±14.7   |
| 20F23324            | 17.0 % |   | 0.0001648       | 0.161416         | 0.0000000        | 9.3190          | 35.7897         | 11.27 ±0.05      | 100.12         | 0.43           | 24.8 ±32.4   |
| 20F23326            | 17.0 % | ✓ | 0.0027144       | 0.248166         | 0.0000000        | 28.3921         | 108.5263        | 11.22 ±0.02      | 99.24          | 1.31           | 49.2 ±43.1   |
| 20F23327            | 17.0 % | ✓ | 0.0002884       | 0.310517         | 0.0010079        | 19.7392         | 75.4924         | 11.23 ±0.03      | 100.10         | 0.91           | 27.3 ±19.3   |
| Σ                   |        |   | 0.5498926       | 96.014823        | 0.0217323        | 2162.0919       | 8252.0495       |                  |                |                |              |

| Information on Analysis                                                                                                                                                                                                                                 | Results          | 40(r)/39(k) ± 2σ           | Age ± 2σ<br>(Ma)                                    | MSWD   | 39Ar(k)<br>(%,n)    | K/Ca ± 2σ |
|---------------------------------------------------------------------------------------------------------------------------------------------------------------------------------------------------------------------------------------------------------|------------------|----------------------------|-----------------------------------------------------|--------|---------------------|-----------|
| Project = SWENTON (20-01)<br>Sample = VS19-098<br>Material = Sanidine<br>Location = Rhyolite Dome<br>Region = Eastern Oregon<br>Analyst = Dan Miggins<br>Irradiation = 20-OSU-01 (1C39-20)<br>J = 0.00160869 ± 0.00000246<br>FCT-NM = 28.201 ± 0.023 Ma | Age Plateau      | 3.81749 ±0.00175           | 11.21 ±0.03                                         | 3.60   | 92.88               | 1.0 ±0.1  |
|                                                                                                                                                                                                                                                         | Error Mean       | ±0.05%                     | ±0.31%                                              | 0%     | 22                  |           |
|                                                                                                                                                                                                                                                         |                  |                            | Full External Error ±0.58                           | 1.62   | 2σ Confidence Limit |           |
|                                                                                                                                                                                                                                                         |                  |                            | Analytical Error ±0.01                              | 1.8963 | Error Magnification |           |
|                                                                                                                                                                                                                                                         | Total Fusion Age | 3.81670 ±0.00092<br>±0.02% | 11.20 ±0.03<br>±0.31%                               |        | 28                  | 9.7 ±0.1  |
|                                                                                                                                                                                                                                                         |                  |                            | Full External Error ±0.58<br>Analytical Error ±0.00 |        |                     |           |

| Normal Isochron |        |   | 39(k)/36(a) ± 2σ     | 40(a+r)/36(a) ± 2σ    | r.i.   |
|-----------------|--------|---|----------------------|-----------------------|--------|
| 20F23287        | 17.0 % | ✓ | 15633.37 ± 2644.48   | 59826.63 ± 10119.89   | 1.0000 |
| 20F23288        | 17.0 % | ✓ | 3360.98 ± 121.45     | 13116.77 ± 473.84     | 0.9997 |
| 20F23290        | 17.0 % | ✓ | 5931.47 ± 184.90     | 22929.75 ± 714.53     | 0.9996 |
| 20F23291        | 17.0 % | ✓ | 1045.84 ± 8.83       | 4289.49 ± 36.03       | 0.9949 |
| 20F23293        | 17.0 % | ✓ | 3125.20 ± 50.58      | 12216.98 ± 197.47     | 0.9987 |
| 20F23294        | 17.0 % | ✓ | 4882.14 ± 286.48     | 18910.93 ± 1109.56    | 0.9999 |
| 20F23296        | 17.0 % | ✓ | 9605.07 ± 703.61     | 36923.59 ± 2704.61    | 0.9999 |
| 20F23297        | 17.0 % | ✓ | 11122.51 ± 511.71    | 42761.84 ± 1967.03    | 0.9998 |
| 20F23299        | 17.0 % | ✓ | 12352.93 ± 1543.80   | 47584.56 ± 5946.70    | 1.0000 |
| 20F23300        | 17.0 % | ✓ | 5093.98 ± 214.03     | 19741.04 ± 829.29     | 0.9998 |
| 20F23302        | 17.0 % | ✓ | 6904.47 ± 273.08     | 26668.04 ± 1054.50    | 0.9998 |
| 20F23303        | 17.0 % | ✓ | 22048.48 ± 3486.25   | 84507.76 ± 13361.97   | 1.0000 |
| 20F23305        | 17.0 % | ✓ | 8513.55 ± 543.64     | 32832.54 ± 2096.35    | 0.9999 |
| 20F23306        | 17.0 % | ✓ | 3497.13 ± 101.34     | 13663.69 ± 395.76     | 0.9995 |
| 20F23308        | 17.0 % | ✓ | 7550.45 ± 373.41     | 29161.69 ± 1441.98    | 0.9998 |
| 20F23309        | 17.0 % | ✓ | 20013.01 ± 1596.26   | 76667.36 ± 6114.74    | 0.9999 |
| 20F23311        | 17.0 % |   | 25724.23 ± 6741.01   | 98883.73 ± 25912.23   | 1.0000 |
| 20F23312        | 17.0 % | ✓ | 25381.35 ± 4378.25   | 97198.34 ± 16766.40   | 1.0000 |
| 20F23314        | 17.0 % | ✓ | 13062.93 ± 1754.74   | 50163.46 ± 6738.29    | 1.0000 |
| 20F23315        | 17.0 % |   | 1434.03 ± 46.45      | 5798.78 ± 187.74      | 0.9993 |
| 20F23317        | 17.0 % | ✓ | 911.74 ± 9.64        | 3781.26 ± 39.86       | 0.9965 |
| 20F23318        | 17.0 % |   | 10966.05 ± 4240.23   | 40740.64 ± 15753.03   | 1.0000 |
| 20F23320        | 17.0 % | ✓ | 25489.21 ± 11938.72  | 97486.43 ± 45660.91   | 1.0000 |
| 20F23321        | 17.0 % |   | 19811.26 ± 21422.06  | 74338.22 ± 80382.31   | 1.0000 |
| 20F23323        | 17.0 % |   | 7432.10 ± 894.14     | 28396.40 ± 3416.21    | 1.0000 |
| 20F23324        | 17.0 % |   | 56543.26 ± 165609.53 | 216856.03 ± 635149.44 | 1.0000 |
| 20F23326        | 17.0 % | ✓ | 10459.84 ± 1969.53   | 40280.40 ± 7584.46    | 1.0000 |
| 20F23327        | 17.0 % | ✓ | 68445.25 ± 117831.01 | 261469.61 ± 450129.43 | 1.0000 |

| Results         | 40(a)/36(a) ± 2σ      | 40(r)/39(k) ± 2σ  | Age ± 2σ (Ma)              | MSWD            |
|-----------------|-----------------------|-------------------|----------------------------|-----------------|
| Normal Isochron | 288.82 ± 10.01        | 3.82227 ± 0.00327 | 11.22 ± 0.04               | 8.55            |
| Error Chron     | ± 3.46%               | ± 0.09%           | ± 0.32%                    | 0%              |
|                 |                       |                   | Full External Error ± 0.58 |                 |
|                 |                       |                   | Analytical Error ± 0.01    |                 |
| .....           |                       |                   |                            |                 |
| Statistics      | 2σ Confidence Limit   | 1.63              | Convergence                | 0.000000133216  |
|                 | Error Magnification   | 2.9241            | Number of Iterations       | 1               |
|                 | Number of Data Points | 22                | Calculated Line            | Weighted York-2 |

| Inverse Isochron |        |   | 39(k)/40(a+r) ± 2σ   | 36(a)/40(a+r) ± 2σ     | r.i.   |
|------------------|--------|---|----------------------|------------------------|--------|
| 20F23287         | 17.0 % | ✓ | 0.2613112 ±0.0002641 | 0.00001671 ±0.00000283 | 0.0005 |
| 20F23288         | 17.0 % | ✓ | 0.2562356 ±0.0002375 | 0.00007624 ±0.00000275 | 0.0014 |
| 20F23290         | 17.0 % | ✓ | 0.2586802 ±0.0002217 | 0.00004361 ±0.00000136 | 0.0008 |
| 20F23291         | 17.0 % | ✓ | 0.2438133 ±0.0002067 | 0.00023313 ±0.00000196 | 0.0026 |
| 20F23293         | 17.0 % | ✓ | 0.2558083 ±0.0002137 | 0.00008185 ±0.00000132 | 0.0010 |
| 20F23294         | 17.0 % | ✓ | 0.2581648 ±0.0002520 | 0.00005288 ±0.00000310 | 0.0012 |
| 20F23296         | 17.0 % | ✓ | 0.2601336 ±0.0002320 | 0.00002708 ±0.00000198 | 0.0007 |
| 20F23297         | 17.0 % | ✓ | 0.2601036 ±0.0002214 | 0.00002339 ±0.00000108 | 0.0005 |
| 20F23299         | 17.0 % | ✓ | 0.2595995 ±0.0002514 | 0.00002102 ±0.00000263 | 0.0006 |
| 20F23300         | 17.0 % | ✓ | 0.2580401 ±0.0002315 | 0.00005066 ±0.00000213 | 0.0012 |
| 20F23302         | 17.0 % | ✓ | 0.2589045 ±0.0002251 | 0.00003750 ±0.00000148 | 0.0009 |
| 20F23303         | 17.0 % | ✓ | 0.2609048 ±0.0002319 | 0.00001183 ±0.00000187 | 0.0003 |
| 20F23305         | 17.0 % | ✓ | 0.2593023 ±0.0002355 | 0.00003046 ±0.00000194 | 0.0007 |
| 20F23306         | 17.0 % | ✓ | 0.2559431 ±0.0002278 | 0.00007319 ±0.00000212 | 0.0013 |
| 20F23308         | 17.0 % | ✓ | 0.2589168 ±0.0002287 | 0.00003429 ±0.00000170 | 0.0008 |
| 20F23309         | 17.0 % | ✓ | 0.2610369 ±0.0002206 | 0.00001304 ±0.00000104 | 0.0002 |
| 20F23311         | 17.0 % |   | 0.2601462 ±0.0002550 | 0.00001011 ±0.00000265 | 0.0003 |
| 20F23312         | 17.0 % | ✓ | 0.2611294 ±0.0002336 | 0.00001029 ±0.00000177 | 0.0003 |
| 20F23314         | 17.0 % | ✓ | 0.2604073 ±0.0002570 | 0.00001993 ±0.00000268 | 0.0006 |
| 20F23315         | 17.0 % |   | 0.2472980 ±0.0002905 | 0.00017245 ±0.00000558 | 0.0042 |
| 20F23317         | 17.0 % | ✓ | 0.2411216 ±0.0002133 | 0.00026446 ±0.00000279 | 0.0030 |
| 20F23318         | 17.0 % |   | 0.2691673 ±0.0004955 | 0.00002455 ±0.00000949 | 0.0011 |
| 20F23320         | 17.0 % | ✓ | 0.2614642 ±0.0003265 | 0.00001026 ±0.00000480 | 0.0004 |
| 20F23321         | 17.0 % |   | 0.2665017 ±0.0007081 | 0.00001345 ±0.00001455 | 0.0006 |
| 20F23323         | 17.0 % |   | 0.2617268 ±0.0002942 | 0.00003522 ±0.00000424 | 0.0013 |
| 20F23324         | 17.0 % |   | 0.2607410 ±0.0006765 | 0.00000461 ±0.00001351 | 0.0002 |
| 20F23326         | 17.0 % | ✓ | 0.2596758 ±0.0003093 | 0.00002483 ±0.00000467 | 0.0011 |
| 20F23327         | 17.0 % | ✓ | 0.2617713 ±0.0003924 | 0.00000382 ±0.00000658 | 0.0002 |

| Results          | 40(a)/36(a) ± 2σ      |        | 40(r)/39(k) ± 2σ     | Age ± 2σ (Ma) | M <sub>SWD</sub>          |      |
|------------------|-----------------------|--------|----------------------|---------------|---------------------------|------|
| Inverse Isochron | 298.26                | ±6.78  | 3.81756              | ±0.00231      | 11.21 ±0.03               | 3.78 |
| Error Chron      |                       | ±2.27% |                      | ±0.06%        | ±0.31%                    | 0%   |
|                  |                       |        |                      |               | Full External Error ±0.58 |      |
|                  |                       |        |                      |               | Analytical Error ±0.01    |      |
| <hr/>            |                       |        |                      |               |                           |      |
| Statistics       | 2σ Confidence Limit   | 1.63   | Convergence          |               | 0.0003792871              |      |
|                  | Error Magnification   | 1.9439 | Number of Iterations |               | 2                         |      |
|                  | Number of Data Points | 22     | Calculated Line      |               | Weighted York-2           |      |
|                  | Spreading Factor      | 7.9%   |                      |               |                           |      |



| Degassing Patterns |        |   | 36Ar(a)<br>[fA] | %1σ    | 36Ar(c)<br>[fA] | %1σ  | 36Ar(ca)<br>[fA] | %1σ    | 36Ar(cl)<br>[fA] | %1σ    | 37Ar(ca)<br>[fA] | %1σ    | 38Ar(a)<br>[fA] | %1σ    | 38Ar(c)<br>[fA] | %1σ  | 38Ar(k)<br>[fA] | %1σ  | 38Ar(ca)<br>[fA] | %1σ    | 38Ar(cl)<br>[fA] | %1σ    | 39Ar(k)<br>[fA] | %1σ  | 39Ar(ca)<br>[fA] | %1σ    | 40Ar(r)<br>[fA] | %1σ  | 40Ar(a)<br>[fA] | %1σ    | 40Ar(c)<br>[fA] | %1σ  | 40Ar(k)<br>[fA] | %1σ  |
|--------------------|--------|---|-----------------|--------|-----------------|------|------------------|--------|------------------|--------|------------------|--------|-----------------|--------|-----------------|------|-----------------|------|------------------|--------|------------------|--------|-----------------|------|------------------|--------|-----------------|------|-----------------|--------|-----------------|------|-----------------|------|
| 20F23287           | 17.0 % | ✓ | 0.0034074       | 8.46   | 0.0000000       | 0.00 | 0.0074563        | 0.60   | 0.0000018        | 113.19 | 27.585117        | 0.58   | 0.0006423       | 8.46   | 0.0000000       | 0.00 | 0.643330        | 0.10 | 0.0049653        | 9.65   | 0.0081760        | 113.19 | 53.2691         | 0.05 | 0.0177234        | 1.09   | 202.8356        | 0.04 | 1.01731         | 8.46   | 0.0000000       | 0.00 | 0.0323343       | 9.65 |
| 20F23288           | 17.0 % | ✓ | 0.0201723       | 1.81   | 0.0000000       | 0.00 | 0.0062105        | 0.68   | 0.0000000        | 0.00   | 22.976442        | 0.66   | 0.0038025       | 1.81   | 0.0000000       | 0.00 | 0.818807        | 0.10 | 0.0041358        | 9.65   | 0.0000000        | 0.00   | 67.7988         | 0.05 | 0.0147624        | 1.13   | 258.5731        | 0.04 | 6.02265         | 1.81   | 0.0000000       | 0.00 | 0.0411539       | 9.65 |
| 20F23290           | 17.0 % | ✓ | 0.0230738       | 1.56   | 0.0000000       | 0.00 | 0.0003669        | 8.26   | 0.0000000        | 0.00   | 1.357462         | 8.26   | 0.0043494       | 1.57   | 0.0000000       | 0.00 | 1.652878        | 0.10 | 0.0002443        | 12.69  | 0.0000000        | 0.00   | 136.8616        | 0.04 | 0.0008722        | 8.31   | 522.1875        | 0.02 | 6.88891         | 1.56   | 0.0000000       | 0.00 | 0.0830750       | 9.65 |
| 20F23291           | 17.0 % | ✓ | 0.1572472       | 0.42   | 0.0000000       | 0.00 | 0.0006884        | 4.40   | 0.0000000        | 0.00   | 2.546925         | 4.40   | 0.0296411       | 0.45   | 0.0000000       | 0.00 | 1.986119        | 0.10 | 0.0004584        | 10.59  | 0.0000000        | 0.00   | 164.4546        | 0.04 | 0.0016364        | 4.50   | 627.5627        | 0.03 | 46.94772        | 0.43   | 0.0000000       | 0.00 | 0.0998240       | 9.65 |
| 20F23293           | 17.0 % | ✓ | 0.0659164       | 0.81   | 0.0000000       | 0.00 | 0.0005910        | 5.27   | 0.0000000        | 0.00   | 2.186415         | 5.26   | 0.0124252       | 0.82   | 0.0000000       | 0.00 | 2.487890        | 0.10 | 0.0003936        | 10.97  | 0.0000000        | 0.00   | 206.0023        | 0.04 | 0.0014048        | 5.34   | 785.6196        | 0.02 | 19.68001        | 0.81   | 0.0000000       | 0.00 | 0.1250434       | 9.65 |
| 20F23294           | 17.0 % | ✓ | 0.0106059       | 2.93   | 0.0000000       | 0.00 | 0.0058567        | 0.72   | 0.0000000        | 0.00   | 21.667255        | 0.69   | 0.0019992       | 2.94   | 0.0000000       | 0.00 | 0.625343        | 0.10 | 0.0039001        | 9.66   | 0.0000000        | 0.00   | 51.7797         | 0.05 | 0.0139212        | 1.15   | 197.4018        | 0.05 | 3.16651         | 2.94   | 0.0000000       | 0.00 | 0.0314303       | 9.65 |
| 20F23296           | 17.0 % | ✓ | 0.0087515       | 3.66   | 0.0000000       | 0.00 | 0.0003882        | 7.99   | 0.0000006        | 357.49 | 1.436147         | 7.99   | 0.0016497       | 3.67   | 0.0000000       | 0.00 | 1.015173        | 0.10 | 0.0002585        | 12.51  | 0.0028516        | 357.49 | 84.0583         | 0.04 | 0.0009227        | 8.04   | 320.5225        | 0.03 | 2.61284         | 3.66   | 0.0000000       | 0.00 | 0.0510234       | 9.65 |
| 20F23297           | 17.0 % | ✓ | 0.0145231       | 2.30   | 0.0000000       | 0.00 | 0.0004166        | 7.15   | 0.0000000        | 0.00   | 1.541279         | 7.15   | 0.0027376       | 2.31   | 0.0000000       | 0.00 | 1.950836        | 0.10 | 0.0002774        | 11.99  | 0.0000000        | 0.00   | 161.5331        | 0.04 | 0.0009903        | 7.21   | 616.6979        | 0.02 | 4.33601         | 2.30   | 0.0000000       | 0.00 | 0.0980506       | 9.65 |
| 20F23299           | 17.0 % | ✓ | 0.0041492       | 6.25   | 0.0000000       | 0.00 | 0.0001078        | 28.02  | 0.0000000        | 0.00   | 0.398734         | 28.02  | 0.0007821       | 6.25   | 0.0000000       | 0.00 | 0.619008        | 0.10 | 0.0000718        | 29.62  | 0.0000000        | 0.00   | 51.2551         | 0.05 | 0.0002562        | 28.03  | 196.2005        | 0.04 | 1.23879         | 6.25   | 0.0000000       | 0.00 | 0.0311119       | 9.65 |
| 20F23300           | 17.0 % | ✓ | 0.0165004       | 2.10   | 0.0000000       | 0.00 | 0.0003055        | 10.53  | 0.0000003        | 681.58 | 1.130183         | 10.53  | 0.0031103       | 2.11   | 0.0000000       | 0.00 | 1.015102        | 0.10 | 0.0002034        | 14.27  | 0.0013877        | 681.58 | 84.0525         | 0.04 | 0.0007261        | 10.57  | 320.8078        | 0.03 | 4.92635         | 2.10   | 0.0000000       | 0.00 | 0.0510199       | 9.65 |
| 20F23302           | 17.0 % | ✓ | 0.0159196       | 1.98   | 0.0000000       | 0.00 | 0.0002629        | 11.10  | 0.0000000        | 0.00   | 0.972457         | 11.10  | 0.0030008       | 1.98   | 0.0000000       | 0.00 | 1.327462        | 0.10 | 0.0001750        | 14.69  | 0.0000000        | 0.00   | 109.9165        | 0.04 | 0.0006248        | 11.14  | 419.7918        | 0.02 | 4.75296         | 1.98   | 0.0000000       | 0.00 | 0.0667193       | 9.65 |
| 20F23303           | 17.0 % | ✓ | 0.0037918       | 7.91   | 0.0000000       | 0.00 | 0.0002545        | 12.20  | 0.0000000        | 0.00   | 0.941625         | 12.20  | 0.0007147       | 7.91   | 0.0000000       | 0.00 | 1.009666        | 0.10 | 0.0001695        | 15.54  | 0.0000000        | 0.00   | 83.6024         | 0.04 | 0.0006050        | 12.23  | 319.3004        | 0.03 | 1.13207         | 7.91   | 0.0000000       | 0.00 | 0.0507466       | 9.65 |
| 20F23305           | 17.0 % | ✓ | 0.0102120       | 3.19   | 0.0000000       | 0.00 | 0.0002660        | 11.99  | 0.0000000        | 0.00   | 0.984156         | 11.99  | 0.0019250       | 3.20   | 0.0000000       | 0.00 | 1.049983        | 0.10 | 0.0001771        | 15.38  | 0.0000000        | 0.00   | 86.9407         | 0.04 | 0.0006323        | 12.02  | 332.2383        | 0.03 | 3.04891         | 3.19   | 0.0000000       | 0.00 | 0.0527730       | 9.65 |
| 20F23306           | 17.0 % | ✓ | 0.0260687       | 1.45   | 0.0000000       | 0.00 | 0.0003133        | 10.12  | 0.0000000        | 0.00   | 1.159099         | 10.11  | 0.0049139       | 1.46   | 0.0000000       | 0.00 | 1.101005        | 0.10 | 0.0002086        | 13.97  | 0.0000000        | 0.00   | 91.1654         | 0.04 | 0.0007447        | 10.16  | 348.4111        | 0.03 | 7.78306         | 1.45   | 0.0000000       | 0.00 | 0.0553374       | 9.65 |
| 20F23308           | 17.0 % | ✓ | 0.0120215       | 2.47   | 0.0000000       | 0.00 | 0.0004169        | 7.59   | 0.0000002        | #####  | 1.542287         | 7.58   | 0.0022661       | 2.48   | 0.0000000       | 0.00 | 1.096206        | 0.10 | 0.0002776        | 12.26  | 0.0009698        | #####  | 90.7681         | 0.04 | 0.0009909        | 7.64   | 346.9793        | 0.03 | 3.58915         | 2.47   | 0.0000000       | 0.00 | 0.0550962       | 9.65 |
| 20F23309           | 17.0 % | ✓ | 0.0081680       | 3.99   | 0.0000000       | 0.00 | 0.0004223        | 7.42   | 0.0000000        | 0.00   | 1.562298         | 7.42   | 0.0015397       | 3.99   | 0.0000000       | 0.00 | 1.974178        | 0.10 | 0.0002812        | 12.16  | 0.0000000        | 0.00   | 163.4659        | 0.04 | 0.0010038        | 7.48   | 623.7789        | 0.02 | 2.43863         | 3.99   | 0.0000000       | 0.00 | 0.0992238       | 9.65 |
| 20F23311           | 17.0 % |   | 0.0021657       | 13.10  | 0.0000000       | 0.00 | 0.0001621        | 20.00  | 0.0000000        | 0.00   | 0.599730         | 20.00  | 0.0004082       | 13.10  | 0.0000000       | 0.00 | 0.672835        | 0.10 | 0.0001080        | 22.20  | 0.0000000        | 0.00   | 55.7121         | 0.05 | 0.0003853        | 20.02  | 213.5104        | 0.04 | 0.64661         | 13.10  | 0.0000000       | 0.00 | 0.0338173       | 9.65 |
| 20F23312           | 17.0 % | ✓ | 0.0034523       | 8.62   | 0.0000000       | 0.00 | 0.0002655        | 11.50  | 0.0000000        | 0.00   | 0.982183         | 11.50  | 0.0006508       | 8.63   | 0.0000000       | 0.00 | 1.058242        | 0.10 | 0.0001768        | 15.00  | 0.0000000        | 0.00   | 87.6246         | 0.04 | 0.0006311        | 11.54  | 334.5294        | 0.03 | 1.03073         | 8.63   | 0.0000000       | 0.00 | 0.0531881       | 9.65 |
| 20F23314           | 17.0 % | ✓ | 0.0043204       | 6.72   | 0.0000000       | 0.00 | 0.0003737        | 8.72   | 0.0000000        | 0.00   | 1.382693         | 8.71   | 0.0008144       | 6.72   | 0.0000000       | 0.00 | 0.681587        | 0.10 | 0.0002489        | 12.99  | 0.0000000        | 0.00   | 56.4368         | 0.05 | 0.0008884        | 8.76   | 215.4353        | 0.04 | 1.28989         | 6.72   | 0.0000000       | 0.00 | 0.0342572       | 9.65 |
| 20F23315           | 17.0 % |   | 0.0215128       | 1.62   | 0.0000000       | 0.00 | 0.0000296        | 105.31 | 0.0000000        | 0.00   | 0.109546         | 105.31 | 0.0040552       | 1.63   | 0.0000000       | 0.00 | 0.372575        | 0.11 | 0.0000197        | 105.75 | 0.0000000        | 0.00   | 30.8499         | 0.06 | 0.0000704        | 105.32 | 118.3252        | 0.09 | 6.42286         | 1.62   | 0.0000000       | 0.00 | 0.0187259       | 9.65 |
| 20F23317           | 17.0 % | ✓ | 0.1116789       | 0.53   | 0.0000000       | 0.00 | 0.0003335        | 9.54   | 0.0000016        | 132.95 | 1.233948         | 9.54   | 0.0210515       | 0.55   | 0.0000000       | 0.00 | 1.229709        | 0.10 | 0.0002221        | 13.55  | 0.0073392        | 132.96 | 101.8224        | 0.04 | 0.0007928        | 9.58   | 388.9435        | 0.05 | 33.34285        | 0.54   | 0.0000000       | 0.00 | 0.0618062       | 9.65 |
| 20F23318           | 17.0 % |   | 0.0013220       | 19.33  | 0.0000000       | 0.00 | 0.0000404        | 74.79  | 0.0000000        | 0.00   | 0.149640         | 74.79  | 0.0002492       | 19.33  | 0.0000000       | 0.00 | 0.175076        | 0.12 | 0.0000269        | 75.41  | 0.0000000        | 0.00   | 14.4967         | 0.08 | 0.0000961        | 74.80  | 54.2522         | 0.15 | 0.39468         | 19.33  | 0.0000000       | 0.00 | 0.0087995       | 9.65 |
| 20F23320           | 17.0 % | ✓ | 0.0010702       | 23.42  | 0.0000000       | 0.00 | 0.0000774        | 38.71  | 0.0000000        | 0.00   | 0.286381         | 38.71  | 0.0002017       | 23.42  | 0.0000000       | 0.00 | 0.329454        | 0.11 | 0.0000515        | 39.89  | 0.0000000        | 0.00   | 27.2795         | 0.06 | 0.0001840        | 38.72  | 104.0140        | 0.08 | 0.31953         | 23.42  | 0.0000000       | 0.00 | 0.0165587       | 9.65 |
| 20F23321           | 17.0 % |   | 0.0004442       | 54.07  | 0.0000000       | 0.00 | 0.0000290        | 101.62 | 0.0000000        | 0.00   | 0.107324         | 101.62 | 0.0000837       | 54.07  | 0.0000000       | 0.00 | 0.106268        | 0.15 | 0.0000193        | 102.08 | 0.0000000        | 0.00   | 8.7992          | 0.11 | 0.0000690        | 101.63 | 33.1501         | 0.23 | 0.13261         | 54.07  | 0.0000000       | 0.00 | 0.0053411       | 9.65 |
| 20F23323           | 17.0 % |   | 0.0046684       | 6.02   | 0.0000000       | 0.00 | 0.0001231        | 22.50  | 0.0000000        | 0.00   | 0.455400         | 22.50  | 0.0008800       | 6.02   | 0.0000000       | 0.00 | 0.419025        | 0.10 | 0.0000820        | 24.47  | 0.0000000        | 0.00   | 34.6961         | 0.05 | 0.0002926        | 22.52  | 131.1724        | 0.07 | 1.39380         | 6.02   | 0.0000000       | 0.00 | 0.0210605       | 9.65 |
| 20F23324           | 17.0 % |   | 0.0001648       | 146.44 | 0.0000000       | 0.00 | 0.0000436        | 65.20  | 0.0000000        | 0.00   | 0.161416         | 65.20  | 0.0000311       | 146.45 | 0.0000000       | 0.00 | 0.112546        | 0.14 | 0.0000291        | 65.91  | 0.0000000        | 0.00   | 9.3190          | 0.11 | 0.0001037        | 65.21  | 35.7897         | 0.21 | 0.04921         | 146.44 | 0.0000000       | 0.00 | 0.0056566       | 9.65 |
| 20F23326           | 17.0 % | ✓ | 0.0027144       | 9.41   | 0.0000000       | 0.00 | 0.0000671        | 43.82  | 0.0000000        | 0.00   | 0.248166         | 43.82  | 0.0005117       | 9.42   | 0.0000000       | 0.00 | 0.342891        | 0.11 | 0.0000447        | 44.86  | 0.0000000        | 0.00   | 28.3921         | 0.05 | 0.0001594        | 43.83  | 108.5263        | 0.07 | 0.81041         | 9.42   | 0.0000000       | 0.00 | 0.0172340       | 9.65 |
| 20F23327           | 17.0 % | ✓ | 0.0002884       | 86.08  | 0.0000000       | 0.00 | 0.0000839        | 35.25  | 0.0000002        | 885.43 | 0.310517         | 35.25  | 0.0000544       | 86.08  | 0.0000000       | 0.00 | 0.238390        | 0.11 | 0.0000559        | 36.54  | 0.0010079        | 885.43 | 19.7392         | 0.07 | 0.0001995        | 35.26  | 75.4924         | 0.10 | 0.08610         | 86.08  | 0.0000000       | 0.00 | 0.0119817       | 9.65 |
| Σ                  |        |   | 0.5498926       | 0.33   | 0.0000000       | 0.00 | 0.0259528        | 0.66   | 0.0000047        | 108.21 | 96.014823        | 0.65   | 0.1036548       | 0.34   | 0.0000000       | 0.00 | 26.111584       | 0.02 | 0.0172827        | 4.30   | 0.0217323        | 108.20 | 2162.0919       | 0.01 | 0.0616895        | 0.77   | 8252.0495       | 0.01 | 164.17594       | 0.34   | 0.0000000       | 0.00 | 1.3123898       | 2.19 |
| Σ                  |        |   |                 |        |                 |      |                  |        | 0.5758501        | 0.32   | 96.014823        | 0.65   |                 |        |                 |      |                 |      |                  |        | 26.254254        | 0.09   |                 |      | 2162.1536        | 0.01   |                 |      |                 |        |                 |      | 8417.5379       | 0.01 |

| Additional Parameters |        |   | 40Ar/39Ar | 1σ       | 37Ar/39Ar | 1σ       | 36Ar/39Ar | 1σ       | Time (days) | 37Ar (decay) | 39Ar (decay) | 40Ar (moles) |
|-----------------------|--------|---|-----------|----------|-----------|----------|-----------|----------|-------------|--------------|--------------|--------------|
| 20F23287              | 17.0 % | ✓ | 3.826188  | 0.001932 | 0.517673  | 0.002993 | 0.000204  | 0.000005 | 132.603     | 13.758242    | 1.00093697   | 7.218E-12    |
| 20F23288              | 17.0 % | ✓ | 3.902416  | 0.001807 | 0.338818  | 0.002248 | 0.000389  | 0.000005 | 132.609     | 13.759940    | 1.00093701   | 9.368E-12    |
| 20F23290              | 17.0 % | ✓ | 3.866359  | 0.001656 | 0.009918  | 0.000820 | 0.000171  | 0.000003 | 132.621     | 13.763149    | 1.00093709   | 1.873E-11    |
| 20F23291              | 17.0 % | ✓ | 4.102065  | 0.001738 | 0.015487  | 0.000681 | 0.000960  | 0.000004 | 132.627     | 13.764849    | 1.00093714   | 2.388E-11    |
| 20F23293              | 17.0 % | ✓ | 3.909758  | 0.001632 | 0.010613  | 0.000559 | 0.000323  | 0.000003 | 132.639     | 13.768059    | 1.00093722   | 2.851E-11    |
| 20F23294              | 17.0 % | ✓ | 3.873061  | 0.001889 | 0.418339  | 0.002912 | 0.000318  | 0.000006 | 132.644     | 13.769570    | 1.00093726   | 7.101E-12    |
| 20F23296              | 17.0 % | ✓ | 3.844744  | 0.001713 | 0.017085  | 0.001365 | 0.000109  | 0.000004 | 132.657     | 13.772970    | 1.00093735   | 1.144E-11    |
| 20F23297              | 17.0 % | ✓ | 3.845206  | 0.001635 | 0.009542  | 0.000682 | 0.000092  | 0.000002 | 132.662     | 13.774481    | 1.00093739   | 2.199E-11    |
| 20F23299              | 17.0 % | ✓ | 3.852675  | 0.001865 | 0.007779  | 0.002179 | 0.000083  | 0.000005 | 132.674     | 13.777693    | 1.00093747   | 6.990E-12    |
| 20F23300              | 17.0 % | ✓ | 3.875940  | 0.001737 | 0.013446  | 0.001416 | 0.000200  | 0.000004 | 132.681     | 13.779394    | 1.00093752   | 1.153E-11    |
| 20F23302              | 17.0 % | ✓ | 3.863014  | 0.001678 | 0.008847  | 0.000982 | 0.000147  | 0.000003 | 132.692     | 13.782608    | 1.00093760   | 1.503E-11    |
| 20F23303              | 17.0 % | ✓ | 3.833394  | 0.001703 | 0.011263  | 0.001374 | 0.000048  | 0.000004 | 132.699     | 13.784309    | 1.00093764   | 1.135E-11    |
| 20F23305              | 17.0 % | ✓ | 3.857082  | 0.001750 | 0.011320  | 0.001357 | 0.000121  | 0.000004 | 132.710     | 13.787524    | 1.00093773   | 1.187E-11    |
| 20F23306              | 17.0 % | ✓ | 3.907694  | 0.001738 | 0.012714  | 0.001286 | 0.000289  | 0.000004 | 132.716     | 13.789037    | 1.00093777   | 1.261E-11    |
| 20F23308              | 17.0 % | ✓ | 3.862809  | 0.001705 | 0.016991  | 0.001289 | 0.000137  | 0.000003 | 132.728     | 13.792442    | 1.00093785   | 1.241E-11    |
| 20F23309              | 17.0 % | ✓ | 3.831459  | 0.001618 | 0.009557  | 0.000709 | 0.000053  | 0.000002 | 132.734     | 13.793956    | 1.00093789   | 2.217E-11    |
| 20F23311              | 17.0 % |   | 3.844573  | 0.001883 | 0.010765  | 0.002153 | 0.000042  | 0.000005 | 132.746     | 13.797173    | 1.00093798   | 7.582E-12    |
| 20F23312              | 17.0 % | ✓ | 3.830098  | 0.001712 | 0.011209  | 0.001289 | 0.000042  | 0.000003 | 132.752     | 13.798876    | 1.00093802   | 1.188E-11    |
| 20F23314              | 17.0 % | ✓ | 3.840685  | 0.001894 | 0.024499  | 0.002135 | 0.000083  | 0.000005 | 132.764     | 13.802094    | 1.00093810   | 7.673E-12    |
| 20F23315              | 17.0 % |   | 4.044302  | 0.002375 | 0.003551  | 0.003740 | 0.000698  | 0.000011 | 132.770     | 13.803798    | 1.00093815   | 4.417E-12    |
| 20F23317              | 17.0 % | ✓ | 4.147859  | 0.001834 | 0.012119  | 0.001156 | 0.001100  | 0.000006 | 132.782     | 13.807017    | 1.00093823   | 1.495E-11    |
| 20F23318              | 17.0 % |   | 3.715744  | 0.003419 | 0.010322  | 0.007720 | 0.000088  | 0.000018 | 132.787     | 13.808532    | 1.00093827   | 1.907E-12    |
| 20F23320              | 17.0 % | ✓ | 3.825196  | 0.002388 | 0.010498  | 0.004063 | 0.000042  | 0.000009 | 132.800     | 13.811942    | 1.00093836   | 3.694E-12    |
| 20F23321              | 17.0 % |   | 3.752899  | 0.004985 | 0.012197  | 0.012395 | 0.000047  | 0.000027 | 132.806     | 13.813458    | 1.00093840   | 1.169E-12    |
| 20F23323              | 17.0 % |   | 3.821353  | 0.002147 | 0.013125  | 0.002953 | 0.000138  | 0.000008 | 132.817     | 13.816679    | 1.00093848   | 4.694E-12    |
| 20F23324              | 17.0 % |   | 3.835788  | 0.004976 | 0.017321  | 0.011294 | 0.000013  | 0.000026 | 132.824     | 13.818385    | 1.00093853   | 1.265E-12    |
| 20F23326              | 17.0 % | ✓ | 3.851541  | 0.002293 | 0.008741  | 0.003830 | 0.000098  | 0.000009 | 132.835     | 13.821608    | 1.00093861   | 3.871E-12    |
| 20F23327              | 17.0 % | ✓ | 3.820696  | 0.002863 | 0.015731  | 0.005545 | 0.000010  | 0.000012 | 132.842     | 13.823314    | 1.00093865   | 2.670E-12    |

| Procedure<br>Blanks |        | 36Ar ± 1σ (SE)<br>[fA] | 37Ar ± 1σ (SE)<br>[fA] | 38Ar ± 1σ (SE)<br>[fA] | 39Ar ± 1σ (SE)<br>[fA] | 40Ar ± 1σ (SE)<br>[fA] |
|---------------------|--------|------------------------|------------------------|------------------------|------------------------|------------------------|
| 20F23287            | 17.0 % | 0.0055970 ±0.0001413   | 0.0140901 ±0.0063522   | 0.0079799 ±0.0063323   | 0.0020901 ±0.0061668   | 1.2854783 ±0.0145410   |
| 20F23288            | 17.0 % | 0.0055970 ±0.0001413   | 0.0140901 ±0.0063522   | 0.0079799 ±0.0063323   | 0.0020901 ±0.0061668   | 1.2854783 ±0.0145410   |
| 20F23290            | 17.0 % | 0.0052875 ±0.0001756   | 0.0148049 ±0.0057042   | 0.0039646 ±0.0071390   | 0.0163281 ±0.0062373   | 1.2087316 ±0.0145901   |
| 20F23291            | 17.0 % | 0.0052875 ±0.0001756   | 0.0148049 ±0.0057042   | 0.0039646 ±0.0071390   | 0.0163281 ±0.0062373   | 1.2087316 ±0.0145901   |
| 20F23293            | 17.0 % | 0.0048404 ±0.0001572   | 0.0164848 ±0.0063887   | 0.0047603 ±0.0062126   | 0.0301092 ±0.0060639   | 1.2169126 ±0.0145742   |
| 20F23294            | 17.0 % | 0.0048404 ±0.0001572   | 0.0164848 ±0.0063887   | 0.0047603 ±0.0062126   | 0.0301092 ±0.0060639   | 1.2169126 ±0.0145742   |
| 20F23296            | 17.0 % | 0.0052698 ±0.0001812   | 0.0178532 ±0.0054567   | 0.0031523 ±0.0070642   | 0.0116009 ±0.0061112   | 1.2052097 ±0.0152348   |
| 20F23297            | 17.0 % | 0.0052698 ±0.0001812   | 0.0178532 ±0.0054567   | 0.0031523 ±0.0070642   | 0.0116009 ±0.0061112   | 1.2052097 ±0.0152348   |
| 20F23299            | 17.0 % | 0.0054104 ±0.0001626   | 0.0130999 ±0.0059433   | 0.0020840 ±0.0062719   | 0.0116737 ±0.0061942   | 1.1947590 ±0.0134638   |
| 20F23300            | 17.0 % | 0.0054104 ±0.0001626   | 0.0130999 ±0.0059433   | 0.0020840 ±0.0062719   | 0.0116737 ±0.0061942   | 1.1947590 ±0.0134638   |
| 20F23302            | 17.0 % | 0.0056867 ±0.0001716   | 0.0186735 ±0.0059188   | 0.0014050 ±0.0066328   | 0.0115543 ±0.0062186   | 1.2043904 ±0.0156275   |
| 20F23303            | 17.0 % | 0.0056867 ±0.0001716   | 0.0186735 ±0.0059188   | 0.0014050 ±0.0066328   | 0.0115543 ±0.0062186   | 1.2043904 ±0.0156275   |
| 20F23305            | 17.0 % | 0.0053859 ±0.0001649   | 0.0202405 ±0.0059934   | 0.0035606 ±0.0066216   | 0.0009505 ±0.0068065   | 1.2519705 ±0.0156240   |
| 20F23306            | 17.0 % | 0.0053859 ±0.0001649   | 0.0202405 ±0.0059934   | 0.0035606 ±0.0066216   | 0.0009505 ±0.0068065   | 1.2519705 ±0.0156240   |
| 20F23308            | 17.0 % | 0.0056294 ±0.0001741   | 0.0206661 ±0.0061029   | 0.0025737 ±0.0067609   | 0.0279561 ±0.0068768   | 1.2195166 ±0.0144809   |
| 20F23309            | 17.0 % | 0.0056294 ±0.0001741   | 0.0206661 ±0.0061029   | 0.0025737 ±0.0067609   | 0.0279561 ±0.0068768   | 1.2195166 ±0.0144809   |
| 20F23311            | 17.0 % | 0.0054080 ±0.0001780   | 0.0186282 ±0.0063945   | 0.0135442 ±0.0064634   | 0.0023236 ±0.0064038   | 1.1997371 ±0.0146268   |
| 20F23312            | 17.0 % | 0.0054080 ±0.0001780   | 0.0186282 ±0.0063945   | 0.0135442 ±0.0064634   | 0.0023236 ±0.0064038   | 1.1997371 ±0.0146268   |
| 20F23314            | 17.0 % | 0.0051162 ±0.0001711   | 0.0080993 ±0.0062236   | 0.0053282 ±0.0067611   | 0.0257678 ±0.0064371   | 1.1714540 ±0.0160537   |
| 20F23315            | 17.0 % | 0.0051162 ±0.0001711   | 0.0080993 ±0.0062236   | 0.0053282 ±0.0067611   | 0.0257678 ±0.0064371   | 1.1714540 ±0.0160537   |
| 20F23317            | 17.0 % | 0.0057534 ±0.0001752   | 0.0244957 ±0.0058018   | 0.0013321 ±0.0060452   | 0.0059215 ±0.0069752   | 1.2944419 ±0.0160473   |
| 20F23318            | 17.0 % | 0.0057534 ±0.0001752   | 0.0244957 ±0.0058018   | 0.0013321 ±0.0060452   | 0.0059215 ±0.0069752   | 1.2944419 ±0.0160473   |
| 20F23320            | 17.0 % | 0.0050757 ±0.0001637   | 0.0204407 ±0.0052681   | 0.0022107 ±0.0062994   | 0.0144317 ±0.0065113   | 1.1237927 ±0.0157028   |
| 20F23321            | 17.0 % | 0.0050757 ±0.0001637   | 0.0204407 ±0.0052681   | 0.0022107 ±0.0062994   | 0.0144317 ±0.0065113   | 1.1237927 ±0.0157028   |
| 20F23323            | 17.0 % | 0.0050757 ±0.0001637   | 0.0204407 ±0.0052681   | 0.0022107 ±0.0062994   | 0.0144317 ±0.0065113   | 1.1237927 ±0.0157028   |
| 20F23324            | 17.0 % | 0.0050757 ±0.0001637   | 0.0204407 ±0.0052681   | 0.0022107 ±0.0062994   | 0.0144317 ±0.0065113   | 1.1237927 ±0.0157028   |
| 20F23326            | 17.0 % | 0.0053543 ±0.0001702   | 0.0179733 ±0.0054678   | 0.0064197 ±0.0062656   | 0.0193615 ±0.0060560   | 1.1395294 ±0.0180469   |
| 20F23327            | 17.0 % | 0.0053543 ±0.0001702   | 0.0179733 ±0.0054678   | 0.0064197 ±0.0062656   | 0.0193615 ±0.0060560   | 1.1395294 ±0.0180469   |

| Intercept Values |        | 36Ar ± 1σ (SE)<br>[fA] | r2     | Regression<br>(type,n) | 37Ar ± 1σ (SE)<br>[fA] | r2     | Regression<br>(type,n) | 38Ar ± 1σ (SE)<br>[fA] | r2     | Regression<br>(type,n) | 39Ar ± 1σ (SE)<br>[fA] | r2     | Regression<br>(type,n) | 40Ar ± 1σ (SE)<br>[fA] | r2     | Regression<br>(type,n) |
|------------------|--------|------------------------|--------|------------------------|------------------------|--------|------------------------|------------------------|--------|------------------------|------------------------|--------|------------------------|------------------------|--------|------------------------|
| 20F23287         | 17.0 % | 0.0163235 ± 0.0002423  | 0.9418 | EXP 149 of 150         | 1.9896707 ± 0.0055299  | 0.9342 | EXP 149 of 150         | 0.6488656 ± 0.0065087  | 0.5138 | EXP 150 of 150         | 53.223950 ± 0.012732   | 0.9995 | EXP 150 of 150         | 205.170745 ± 0.025764  | 0.9997 | EXP 150 of 150         |
| 20F23288         | 17.0 % | 0.0316426 ± 0.0003254  | 0.8579 | EXP 150 of 150         | 1.6546942 ± 0.0062038  | 0.8902 | EXP 149 of 150         | 0.8167131 ± 0.0059983  | 0.6735 | EXP 150 of 150         | 67.734201 ± 0.011921   | 0.9997 | EXP 150 of 150         | 265.922341 ± 0.024846  | 0.9999 | EXP 148 of 150         |
| 20F23290         | 17.0 % | 0.0284286 ± 0.0003047  | 0.9310 | EXP 148 of 150         | 0.0837649 ± 0.0058005  | 0.0333 | EXP 150 of 150         | 1.6484866 ± 0.0067747  | 0.8645 | EXP 150 of 150         | 136.722772 ± 0.015606  | 0.9999 | EXP 150 of 150         | 530.368192 ± 0.034579  | 0.9999 | EXP 150 of 150         |
| 20F23291         | 17.0 % | 0.1612042 ± 0.0005741  | 0.0172 | EXP 149 of 150         | 0.1701129 ± 0.0057560  | 0.1356 | EXP 150 of 150         | 2.0054367 ± 0.0064943  | 0.9060 | EXP 150 of 150         | 164.285102 ± 0.016656  | 0.9999 | EXP 150 of 150         | 675.818954 ± 0.042895  | 0.9999 | EXP 150 of 150         |
| 20F23293         | 17.0 % | 0.0704977 ± 0.0004895  | 0.8266 | EXP 150 of 150         | 0.1422214 ± 0.0053452  | 0.1030 | EXP 150 of 150         | 2.4890979 ± 0.0066137  | 0.9369 | EXP 150 of 150         | 205.798939 ± 0.016997  | 0.9999 | EXP 149 of 150         | 806.641545 ± 0.043191  | 1.0000 | EXP 150 of 150         |
| 20F23294         | 17.0 % | 0.0210926 ± 0.0002593  | 0.9191 | EXP 150 of 150         | 1.5561124 ± 0.0063300  | 0.8725 | EXP 150 of 150         | 0.6256741 ± 0.0070699  | 0.4251 | EXP 150 of 150         | 51.764646 ± 0.010790   | 0.9996 | EXP 150 of 150         | 201.816660 ± 0.022005  | 0.9997 | EXP 148 of 150         |
| 20F23296         | 17.0 % | 0.0142932 ± 0.0002571  | 0.9410 | EXP 150 of 150         | 0.0863559 ± 0.0062781  | 0.0255 | EXP 150 of 150         | 1.0163632 ± 0.0068542  | 0.6794 | EXP 150 of 150         | 83.975015 ± 0.011621   | 0.9998 | EXP 148 of 150         | 324.391564 ± 0.030005  | 0.9999 | EXP 150 of 150         |
| 20F23297         | 17.0 % | 0.0200185 ± 0.0002729  | 0.9625 | EXP 147 of 150         | 0.0939721 ± 0.0058259  | 0.0235 | EXP 150 of 150         | 1.9392655 ± 0.0070855  | 0.8838 | EXP 150 of 150         | 161.361513 ± 0.017542  | 0.9999 | EXP 150 of 150         | 622.337164 ± 0.037649  | 1.0000 | EXP 150 of 150         |
| 20F23299         | 17.0 % | 0.0096130 ± 0.0001953  | 0.9572 | EXP 147 of 150         | 0.0158230 ± 0.0055065  | 0.0018 | EXP 149 of 150         | 0.6068240 ± 0.0066688  | 0.4256 | EXP 149 of 150         | 51.208611 ± 0.010190   | 0.9996 | EXP 150 of 150         | 198.665139 ± 0.021656  | 0.9998 | EXP 150 of 150         |
| 20F23300         | 17.0 % | 0.0220017 ± 0.0002981  | 0.9185 | EXP 150 of 150         | 0.0688696 ± 0.0062500  | 0.0685 | EXP 149 of 150         | 1.0173023 ± 0.0065641  | 0.7284 | EXP 150 of 150         | 83.969016 ± 0.012206   | 0.9998 | EXP 144 of 150         | 326.979894 ± 0.031405  | 0.9999 | EXP 150 of 150         |
| 20F23302         | 17.0 % | 0.0216623 ± 0.0002561  | 0.9446 | EXP 150 of 150         | 0.0518401 ± 0.0051126  | 0.0004 | EXP 145 of 150         | 1.3088953 ± 0.0066124  | 0.7980 | EXP 150 of 150         | 109.803356 ± 0.013250  | 0.9999 | EXP 150 of 150         | 425.815904 ± 0.033472  | 0.9999 | EXP 149 of 150         |
| 20F23303         | 17.0 % | 0.0096813 ± 0.0002391  | 0.9562 | EXP 150 of 150         | 0.0495961 ± 0.0058501  | 0.0016 | EXP 150 of 150         | 0.9964450 ± 0.0058135  | 0.7306 | EXP 145 of 150         | 83.519179 ± 0.011336   | 0.9998 | EXP 148 of 150         | 321.687584 ± 0.028071  | 0.9999 | EXP 147 of 150         |
| 20F23305         | 17.0 % | 0.0157300 ± 0.0002741  | 0.9366 | EXP 149 of 150         | 0.0510960 ± 0.0060934  | 0.0145 | EXP 150 of 150         | 1.0310821 ± 0.0064945  | 0.7096 | EXP 150 of 150         | 86.841231 ± 0.014253   | 0.9998 | EXP 149 of 150         | 336.591923 ± 0.028796  | 0.9999 | EXP 150 of 150         |
| 20F23306         | 17.0 % | 0.0314306 ± 0.0003301  | 0.8844 | EXP 149 of 150         | 0.0637675 ± 0.0060138  | 0.0007 | EXP 150 of 150         | 1.1015273 ± 0.0058277  | 0.7851 | EXP 147 of 150         | 91.061237 ± 0.013140   | 0.9998 | EXP 150 of 150         | 357.501507 ± 0.028087  | 0.9999 | EXP 149 of 150         |
| 20F23308         | 17.0 % | 0.0179090 ± 0.0002333  | 0.9446 | EXP 147 of 150         | 0.0910866 ± 0.0058647  | 0.0510 | EXP 150 of 150         | 1.0966963 ± 0.0067160  | 0.7249 | EXP 150 of 150         | 90.693469 ± 0.011774   | 0.9998 | EXP 150 of 150         | 351.843102 ± 0.029875  | 0.9999 | EXP 149 of 150         |
| 20F23309         | 17.0 % | 0.0141098 ± 0.0002682  | 0.9646 | EXP 149 of 150         | 0.0925241 ± 0.0057540  | 0.0069 | EXP 150 of 150         | 1.9601484 ± 0.0070699  | 0.8944 | EXP 148 of 150         | 163.308373 ± 0.015970  | 0.9999 | EXP 150 of 150         | 627.536283 ± 0.035382  | 1.0000 | EXP 150 of 150         |
| 20F23311         | 17.0 % | 0.0077061 ± 0.0002139  | 0.9505 | EXP 150 of 150         | 0.0248128 ± 0.0058780  | 0.0092 | EXP 150 of 150         | 0.6538228 ± 0.0068097  | 0.4694 | EXP 150 of 150         | 55.646632 ± 0.011555   | 0.9996 | EXP 150 of 150         | 215.390575 ± 0.026699  | 0.9997 | EXP 150 of 150         |
| 20F23312         | 17.0 % | 0.0090783 ± 0.0002319  | 0.9569 | EXP 150 of 150         | 0.0525067 ± 0.0050986  | 0.0436 | EXP 147 of 150         | 1.0367954 ± 0.0064910  | 0.7088 | EXP 150 of 150         | 87.522940 ± 0.012238   | 0.9998 | EXP 147 of 150         | 336.813004 ± 0.033020  | 0.9999 | EXP 150 of 150         |
| 20F23314         | 17.0 % | 0.0097503 ± 0.0002274  | 0.9397 | EXP 150 of 150         | 0.0920193 ± 0.0061011  | 0.0166 | EXP 150 of 150         | 0.6758207 ± 0.0068740  | 0.5126 | EXP 150 of 150         | 56.399079 ± 0.012079   | 0.9996 | EXP 150 of 150         | 217.930915 ± 0.026910  | 0.9997 | EXP 150 of 150         |
| 20F23315         | 17.0 % | 0.0263832 ± 0.0002946  | 0.8098 | EXP 150 of 150         | 0.0001682 ± 0.0055702  | 0.0002 | EXP 150 of 150         | 0.3730489 ± 0.0064845  | 0.2851 | EXP 150 of 150         | 30.840579 ± 0.009643   | 0.9991 | EXP 149 of 150         | 125.938214 ± 0.019043  | 0.9994 | EXP 149 of 150         |
| 20F23317         | 17.0 % | 0.1163355 ± 0.0005234  | 0.0010 | EXP 150 of 150         | 0.0648207 ± 0.0062296  | 0.0128 | EXP 150 of 150         | 1.2564751 ± 0.0069426  | 0.7829 | EXP 150 of 150         | 101.712885 ± 0.014600  | 0.9998 | EXP 150 of 150         | 423.642607 ± 0.031009  | 0.9999 | EXP 150 of 150         |
| 20F23318         | 17.0 % | 0.0044883 ± 0.0001791  | 0.9479 | EXP 149 of 150         | 0.0136656 ± 0.0056524  | 0.0000 | EXP 150 of 150         | 0.1693707 ± 0.0058096  | 0.0954 | EXP 149 of 150         | 14.486150 ± 0.007237   | 0.9973 | EXP 150 of 150         | 55.160729 ± 0.018102   | 0.9603 | EXP 149 of 150         |
| 20F23320         | 17.0 % | 0.0062087 ± 0.0001832  | 0.9472 | EXP 150 of 150         | 0.0002809 ± 0.0060476  | 0.0082 | EXP 150 of 150         | 0.3150365 ± 0.0060820  | 0.1595 | EXP 149 of 150         | 27.262977 ± 0.009035   | 0.9989 | EXP 150 of 150         | 105.473925 ± 0.019959  | 0.9989 | EXP 147 of 150         |
| 20F23321         | 17.0 % | 0.0046659 ± 0.0001690  | 0.9454 | EXP 148 of 150         | 0.0126759 ± 0.0058747  | 0.0004 | EXP 149 of 150         | 0.0970854 ± 0.0061186  | 0.0137 | EXP 150 of 150         | 8.803670 ± 0.006834    | 0.9933 | EXP 147 of 150         | 34.146602 ± 0.015551   | 0.9617 | EXP 146 of 150         |
| 20F23323         | 17.0 % | 0.0098060 ± 0.0002219  | 0.9183 | EXP 150 of 150         | 0.0124994 ± 0.0052112  | 0.0088 | EXP 149 of 150         | 0.4113697 ± 0.0058458  | 0.2963 | EXP 149 of 150         | 34.671247 ± 0.009388   | 0.9993 | EXP 149 of 150         | 133.711051 ± 0.022791  | 0.9993 | EXP 150 of 150         |
| 20F23324         | 17.0 % | 0.0049561 ± 0.0001708  | 0.9434 | EXP 150 of 150         | 0.0087666 ± 0.0054943  | 0.0001 | EXP 149 of 150         | 0.0987168 ± 0.0063949  | 0.0065 | EXP 150 of 150         | 9.322901 ± 0.007025    | 0.9936 | EXP 148 of 150         | 36.869909 ± 0.018482   | 0.8528 | EXP 150 of 150         |
| 20F23326         | 17.0 % | 0.0081002 ± 0.0001839  | 0.9427 | EXP 147 of 150         | 0.0000294 ± 0.0056493  | 0.0000 | EXP 150 of 150         | 0.3352458 ± 0.0058546  | 0.2729 | EXP 150 of 150         | 28.379196 ± 0.008212   | 0.9992 | EXP 149 of 150         | 110.493439 ± 0.020298  | 0.9991 | EXP 150 of 150         |
| 20F23327         | 17.0 % | 0.0051527 ± 0.0001739  | 0.9439 | EXP 150 of 150         | 0.0044762 ± 0.0057192  | 0.0141 | EXP 150 of 150         | 0.2328823 ± 0.0063177  | 0.1284 | EXP 148 of 150         | 19.736240 ± 0.008383   | 0.9982 | EXP 150 of 150         | 76.557829 ± 0.019353   | 0.9970 | EXP 149 of 150         |

| Project Info |        | Analyst     | Irradiation | X-pos | Y-pos | Z/H-pos | Project                | Experiment | Nmb |
|--------------|--------|-------------|-------------|-------|-------|---------|------------------------|------------|-----|
| 20F23287     | 17.0 % | Dan Miggins | 20-OSU-01   | 0.00  | 0.00  | 48.55   | Oregon\Swenton (20-01) | 20F23283   | 01  |
| 20F23288     | 17.0 % | Dan Miggins | 20-OSU-01   | 0.00  | 0.00  | 48.55   | Oregon\Swenton (20-01) | 20F23283   | 01  |
| 20F23290     | 17.0 % | Dan Miggins | 20-OSU-01   | 0.00  | 0.00  | 48.55   | Oregon\Swenton (20-01) | 20F23283   | 01  |
| 20F23291     | 17.0 % | Dan Miggins | 20-OSU-01   | 0.00  | 0.00  | 48.55   | Oregon\Swenton (20-01) | 20F23283   | 01  |
| 20F23293     | 17.0 % | Dan Miggins | 20-OSU-01   | 0.00  | 0.00  | 48.55   | Oregon\Swenton (20-01) | 20F23283   | 01  |
| 20F23294     | 17.0 % | Dan Miggins | 20-OSU-01   | 0.00  | 0.00  | 48.55   | Oregon\Swenton (20-01) | 20F23283   | 01  |
| 20F23296     | 17.0 % | Dan Miggins | 20-OSU-01   | 0.00  | 0.00  | 48.55   | Oregon\Swenton (20-01) | 20F23283   | 01  |
| 20F23297     | 17.0 % | Dan Miggins | 20-OSU-01   | 0.00  | 0.00  | 48.55   | Oregon\Swenton (20-01) | 20F23283   | 01  |
| 20F23299     | 17.0 % | Dan Miggins | 20-OSU-01   | 0.00  | 0.00  | 48.55   | Oregon\Swenton (20-01) | 20F23283   | 01  |
| 20F23300     | 17.0 % | Dan Miggins | 20-OSU-01   | 0.00  | 0.00  | 48.55   | Oregon\Swenton (20-01) | 20F23283   | 01  |
| 20F23302     | 17.0 % | Dan Miggins | 20-OSU-01   | 0.00  | 0.00  | 48.55   | Oregon\Swenton (20-01) | 20F23283   | 01  |
| 20F23303     | 17.0 % | Dan Miggins | 20-OSU-01   | 0.00  | 0.00  | 48.55   | Oregon\Swenton (20-01) | 20F23283   | 01  |
| 20F23305     | 17.0 % | Dan Miggins | 20-OSU-01   | 0.00  | 0.00  | 48.55   | Oregon\Swenton (20-01) | 20F23283   | 01  |
| 20F23306     | 17.0 % | Dan Miggins | 20-OSU-01   | 0.00  | 0.00  | 48.55   | Oregon\Swenton (20-01) | 20F23283   | 01  |
| 20F23308     | 17.0 % | Dan Miggins | 20-OSU-01   | 0.00  | 0.00  | 48.55   | Oregon\Swenton (20-01) | 20F23283   | 01  |
| 20F23309     | 17.0 % | Dan Miggins | 20-OSU-01   | 0.00  | 0.00  | 48.55   | Oregon\Swenton (20-01) | 20F23283   | 01  |
| 20F23311     | 17.0 % | Dan Miggins | 20-OSU-01   | 0.00  | 0.00  | 48.55   | Oregon\Swenton (20-01) | 20F23283   | 01  |
| 20F23312     | 17.0 % | Dan Miggins | 20-OSU-01   | 0.00  | 0.00  | 48.55   | Oregon\Swenton (20-01) | 20F23283   | 01  |
| 20F23314     | 17.0 % | Dan Miggins | 20-OSU-01   | 0.00  | 0.00  | 48.55   | Oregon\Swenton (20-01) | 20F23283   | 01  |
| 20F23315     | 17.0 % | Dan Miggins | 20-OSU-01   | 0.00  | 0.00  | 48.55   | Oregon\Swenton (20-01) | 20F23283   | 01  |
| 20F23317     | 17.0 % | Dan Miggins | 20-OSU-01   | 0.00  | 0.00  | 48.55   | Oregon\Swenton (20-01) | 20F23283   | 01  |
| 20F23318     | 17.0 % | Dan Miggins | 20-OSU-01   | 0.00  | 0.00  | 48.55   | Oregon\Swenton (20-01) | 20F23283   | 01  |
| 20F23320     | 17.0 % | Dan Miggins | 20-OSU-01   | 0.00  | 0.00  | 48.55   | Oregon\Swenton (20-01) | 20F23283   | 01  |
| 20F23321     | 17.0 % | Dan Miggins | 20-OSU-01   | 0.00  | 0.00  | 48.55   | Oregon\Swenton (20-01) | 20F23283   | 01  |
| 20F23323     | 17.0 % | Dan Miggins | 20-OSU-01   | 0.00  | 0.00  | 48.55   | Oregon\Swenton (20-01) | 20F23283   | 01  |
| 20F23324     | 17.0 % | Dan Miggins | 20-OSU-01   | 0.00  | 0.00  | 48.55   | Oregon\Swenton (20-01) | 20F23283   | 01  |
| 20F23326     | 17.0 % | Dan Miggins | 20-OSU-01   | 0.00  | 0.00  | 48.55   | Oregon\Swenton (20-01) | 20F23283   | 01  |
| 20F23327     | 17.0 % | Dan Miggins | 20-OSU-01   | 0.00  | 0.00  | 48.55   | Oregon\Swenton (20-01) | 20F23283   | 01  |

| OSU Argon Geochronology Lab<br>CEOAS Oregon State University, Corvallis, USA |        |          |          |               |                  |                  |       |                     |                    |       |            |       |               |       |           |       |              |                        |     |       |      |      |     |        |
|------------------------------------------------------------------------------|--------|----------|----------|---------------|------------------|------------------|-------|---------------------|--------------------|-------|------------|-------|---------------|-------|-----------|-------|--------------|------------------------|-----|-------|------|------|-----|--------|
| Sample Parameters                                                            |        | Sample   | Material | Location      | Standard Name    | Standard (in Ma) | %1σ   | Standard Reference  | Standard 40Ar/39Ar | %1σ   | J          | %1σ   | Air 40Ar/36Ar | %1σ   | MDF (lin) | %1σ   | Volume Ratio | Sensitivity (mol/volt) | Day | Month | Year | Hour | Min | Resist |
| 20F23287                                                                     | 17.0 % | VS19-098 | Sanidine | Rhyolite Dome | FCT-NM (1C39-20) | 28.201           | 0.082 | Kuiper et al (2008) | 9.651              | 0.153 | 0.00160869 | 0.153 | 298.804       | 0.124 | 0.9997956 | 0.040 | 1            | 3.54E-14               | 27  | AUG   | 2020 | 4    | 59  | 1      |
| 20F23288                                                                     | 17.0 % | VS19-098 | Sanidine | Rhyolite Dome | FCT-NM (1C39-20) | 28.201           | 0.082 | Kuiper et al (2008) | 9.651              | 0.153 | 0.00160869 | 0.153 | 298.804       | 0.124 | 0.9997956 | 0.040 | 1            | 3.54E-14               | 27  | AUG   | 2020 | 5    | 8   | 1      |
| 20F23290                                                                     | 17.0 % | VS19-098 | Sanidine | Rhyolite Dome | FCT-NM (1C39-20) | 28.201           | 0.082 | Kuiper et al (2008) | 9.651              | 0.153 | 0.00160869 | 0.153 | 298.804       | 0.124 | 0.9997956 | 0.040 | 1            | 3.54E-14               | 27  | AUG   | 2020 | 5    | 25  | 1      |
| 20F23291                                                                     | 17.0 % | VS19-098 | Sanidine | Rhyolite Dome | FCT-NM (1C39-20) | 28.201           | 0.082 | Kuiper et al (2008) | 9.651              | 0.153 | 0.00160869 | 0.153 | 298.804       | 0.124 | 0.9997956 | 0.040 | 1            | 3.54E-14               | 27  | AUG   | 2020 | 5    | 34  | 1      |
| 20F23293                                                                     | 17.0 % | VS19-098 | Sanidine | Rhyolite Dome | FCT-NM (1C39-20) | 28.201           | 0.082 | Kuiper et al (2008) | 9.651              | 0.153 | 0.00160869 | 0.153 | 298.804       | 0.124 | 0.9997956 | 0.040 | 1            | 3.54E-14               | 27  | AUG   | 2020 | 5    | 51  | 1      |
| 20F23294                                                                     | 17.0 % | VS19-098 | Sanidine | Rhyolite Dome | FCT-NM (1C39-20) | 28.201           | 0.082 | Kuiper et al (2008) | 9.651              | 0.153 | 0.00160869 | 0.153 | 298.804       | 0.124 | 0.9997956 | 0.040 | 1            | 3.54E-14               | 27  | AUG   | 2020 | 5    | 59  | 1      |
| 20F23296                                                                     | 17.0 % | VS19-098 | Sanidine | Rhyolite Dome | FCT-NM (1C39-20) | 28.201           | 0.082 | Kuiper et al (2008) | 9.651              | 0.153 | 0.00160869 | 0.153 | 298.804       | 0.124 | 0.9997956 | 0.040 | 1            | 3.54E-14               | 27  | AUG   | 2020 | 6    | 17  | 1      |
| 20F23297                                                                     | 17.0 % | VS19-098 | Sanidine | Rhyolite Dome | FCT-NM (1C39-20) | 28.201           | 0.082 | Kuiper et al (2008) | 9.651              | 0.153 | 0.00160869 | 0.153 | 298.804       | 0.124 | 0.9997956 | 0.040 | 1            | 3.54E-14               | 27  | AUG   | 2020 | 6    | 25  | 1      |
| 20F23299                                                                     | 17.0 % | VS19-098 | Sanidine | Rhyolite Dome | FCT-NM (1C39-20) | 28.201           | 0.082 | Kuiper et al (2008) | 9.651              | 0.153 | 0.00160869 | 0.153 | 298.804       | 0.124 | 0.9997956 | 0.040 | 1            | 3.54E-14               | 27  | AUG   | 2020 | 6    | 42  | 1      |
| 20F23300                                                                     | 17.0 % | VS19-098 | Sanidine | Rhyolite Dome | FCT-NM (1C39-20) | 28.201           | 0.082 | Kuiper et al (2008) | 9.651              | 0.153 | 0.00160869 | 0.153 | 298.804       | 0.124 | 0.9997956 | 0.040 | 1            | 3.54E-14               | 27  | AUG   | 2020 | 6    | 51  | 1      |
| 20F23302                                                                     | 17.0 % | VS19-098 | Sanidine | Rhyolite Dome | FCT-NM (1C39-20) | 28.201           | 0.082 | Kuiper et al (2008) | 9.651              | 0.153 | 0.00160869 | 0.153 | 298.804       | 0.124 | 0.9997956 | 0.040 | 1            | 3.54E-14               | 27  | AUG   | 2020 | 7    | 8   | 1      |
| 20F23303                                                                     | 17.0 % | VS19-098 | Sanidine | Rhyolite Dome | FCT-NM (1C39-20) | 28.201           | 0.082 | Kuiper et al (2008) | 9.651              | 0.153 | 0.00160869 | 0.153 | 298.804       | 0.124 | 0.9997956 | 0.040 | 1            | 3.54E-14               | 27  | AUG   | 2020 | 7    | 17  | 1      |
| 20F23305                                                                     | 17.0 % | VS19-098 | Sanidine | Rhyolite Dome | FCT-NM (1C39-20) | 28.201           | 0.082 | Kuiper et al (2008) | 9.651              | 0.153 | 0.00160869 | 0.153 | 298.804       | 0.124 | 0.9997956 | 0.040 | 1            | 3.54E-14               | 27  | AUG   | 2020 | 7    | 34  | 1      |
| 20F23306                                                                     | 17.0 % | VS19-098 | Sanidine | Rhyolite Dome | FCT-NM (1C39-20) | 28.201           | 0.082 | Kuiper et al (2008) | 9.651              | 0.153 | 0.00160869 | 0.153 | 298.804       | 0.124 | 0.9997956 | 0.040 | 1            | 3.54E-14               | 27  | AUG   | 2020 | 7    | 42  | 1      |
| 20F23308                                                                     | 17.0 % | VS19-098 | Sanidine | Rhyolite Dome | FCT-NM (1C39-20) | 28.201           | 0.082 | Kuiper et al (2008) | 9.651              | 0.153 | 0.00160869 | 0.153 | 298.804       | 0.124 | 0.9997956 | 0.040 | 1            | 3.54E-14               | 27  | AUG   | 2020 | 8    | 0   | 1      |
| 20F23309                                                                     | 17.0 % | VS19-098 | Sanidine | Rhyolite Dome | FCT-NM (1C39-20) | 28.201           | 0.082 | Kuiper et al (2008) | 9.651              | 0.153 | 0.00160869 | 0.153 | 298.804       | 0.124 | 0.9997956 | 0.040 | 1            | 3.54E-14               | 27  | AUG   | 2020 | 8    | 8   | 1      |
| 20F23311                                                                     | 17.0 % | VS19-098 | Sanidine | Rhyolite Dome | FCT-NM (1C39-20) | 28.201           | 0.082 | Kuiper et al (2008) | 9.651              | 0.153 | 0.00160869 | 0.153 | 298.804       | 0.124 | 0.9997956 | 0.040 | 1            | 3.54E-14               | 27  | AUG   | 2020 | 8    | 25  | 1      |
| 20F23312                                                                     | 17.0 % | VS19-098 | Sanidine | Rhyolite Dome | FCT-NM (1C39-20) | 28.201           | 0.082 | Kuiper et al (2008) | 9.651              | 0.153 | 0.00160869 | 0.153 | 298.804       | 0.124 | 0.9997956 | 0.040 | 1            | 3.54E-14               | 27  | AUG   | 2020 | 8    | 34  | 1      |
| 20F23314                                                                     | 17.0 % | VS19-098 | Sanidine | Rhyolite Dome | FCT-NM (1C39-20) | 28.201           | 0.082 | Kuiper et al (2008) | 9.651              | 0.153 | 0.00160869 | 0.153 | 298.804       | 0.124 | 0.9997956 | 0.040 | 1            | 3.54E-14               | 27  | AUG   | 2020 | 8    | 51  | 1      |
| 20F23315                                                                     | 17.0 % | VS19-098 | Sanidine | Rhyolite Dome | FCT-NM (1C39-20) | 28.201           | 0.082 | Kuiper et al (2008) | 9.651              | 0.153 | 0.00160869 | 0.153 | 298.804       | 0.124 | 0.9997956 | 0.040 | 1            | 3.54E-14               | 27  | AUG   | 2020 | 9    | 0   | 1      |
| 20F23317                                                                     | 17.0 % | VS19-098 | Sanidine | Rhyolite Dome | FCT-NM (1C39-20) | 28.201           | 0.082 | Kuiper et al (2008) | 9.651              | 0.153 | 0.00160869 | 0.153 | 298.804       | 0.124 | 0.9997956 | 0.040 | 1            | 3.54E-14               | 27  | AUG   | 2020 | 9    | 17  | 1      |
| 20F23318                                                                     | 17.0 % | VS19-098 | Sanidine | Rhyolite Dome | FCT-NM (1C39-20) | 28.201           | 0.082 | Kuiper et al (2008) | 9.651              | 0.153 | 0.00160869 | 0.153 | 298.804       | 0.124 | 0.9997956 | 0.040 | 1            | 3.54E-14               | 27  | AUG   | 2020 | 9    | 25  | 1      |
| 20F23320                                                                     | 17.0 % | VS19-098 | Sanidine | Rhyolite Dome | FCT-NM (1C39-20) | 28.201           | 0.082 | Kuiper et al (2008) | 9.651              | 0.153 | 0.00160869 | 0.153 | 298.804       | 0.124 | 0.9997956 | 0.040 | 1            | 3.54E-14               | 27  | AUG   | 2020 | 9    | 43  | 1      |
| 20F23321                                                                     | 17.0 % | VS19-098 | Sanidine | Rhyolite Dome | FCT-NM (1C39-20) | 28.201           | 0.082 | Kuiper et al (2008) | 9.651              | 0.153 | 0.00160869 | 0.153 | 298.804       | 0.124 | 0.9997956 | 0.040 | 1            | 3.54E-14               | 27  | AUG   | 2020 | 9    | 51  | 1      |
| 20F23323                                                                     | 17.0 % | VS19-098 | Sanidine | Rhyolite Dome | FCT-NM (1C39-20) | 28.201           | 0.082 | Kuiper et al (2008) | 9.651              | 0.153 | 0.00160869 | 0.153 | 298.804       | 0.124 | 0.9997956 | 0.040 | 1            | 3.54E-14               | 27  | AUG   | 2020 | 10   | 8   | 1      |
| 20F23324                                                                     | 17.0 % | VS19-098 | Sanidine | Rhyolite Dome | FCT-NM (1C39-20) | 28.201           | 0.082 | Kuiper et al (2008) | 9.651              | 0.153 | 0.00160869 | 0.153 | 298.804       | 0.124 | 0.9997956 | 0.040 | 1            | 3.54E-14               | 27  | AUG   | 2020 | 10   | 17  | 1      |
| 20F23326                                                                     | 17.0 % | VS19-098 | Sanidine | Rhyolite Dome | FCT-NM (1C39-20) | 28.201           | 0.082 | Kuiper et al (2008) | 9.651              | 0.153 | 0.00160869 | 0.153 | 298.804       | 0.124 | 0.9997956 | 0.040 | 1            | 3.54E-14               | 27  | AUG   | 2020 | 10   | 34  | 1      |
| 20F23327                                                                     | 17.0 % | VS19-098 | Sanidine | Rhyolite Dome | FCT-NM (1C39-20) | 28.201           | 0.082 | Kuiper et al (2008) | 9.651              | 0.153 | 0.00160869 | 0.153 | 298.804       | 0.124 | 0.9997956 | 0.040 | 1            | 3.54E-14               | 27  | AUG   | 2020 | 10   | 43  | 1      |



20F23283.AGE >>> VS19-098 >>>

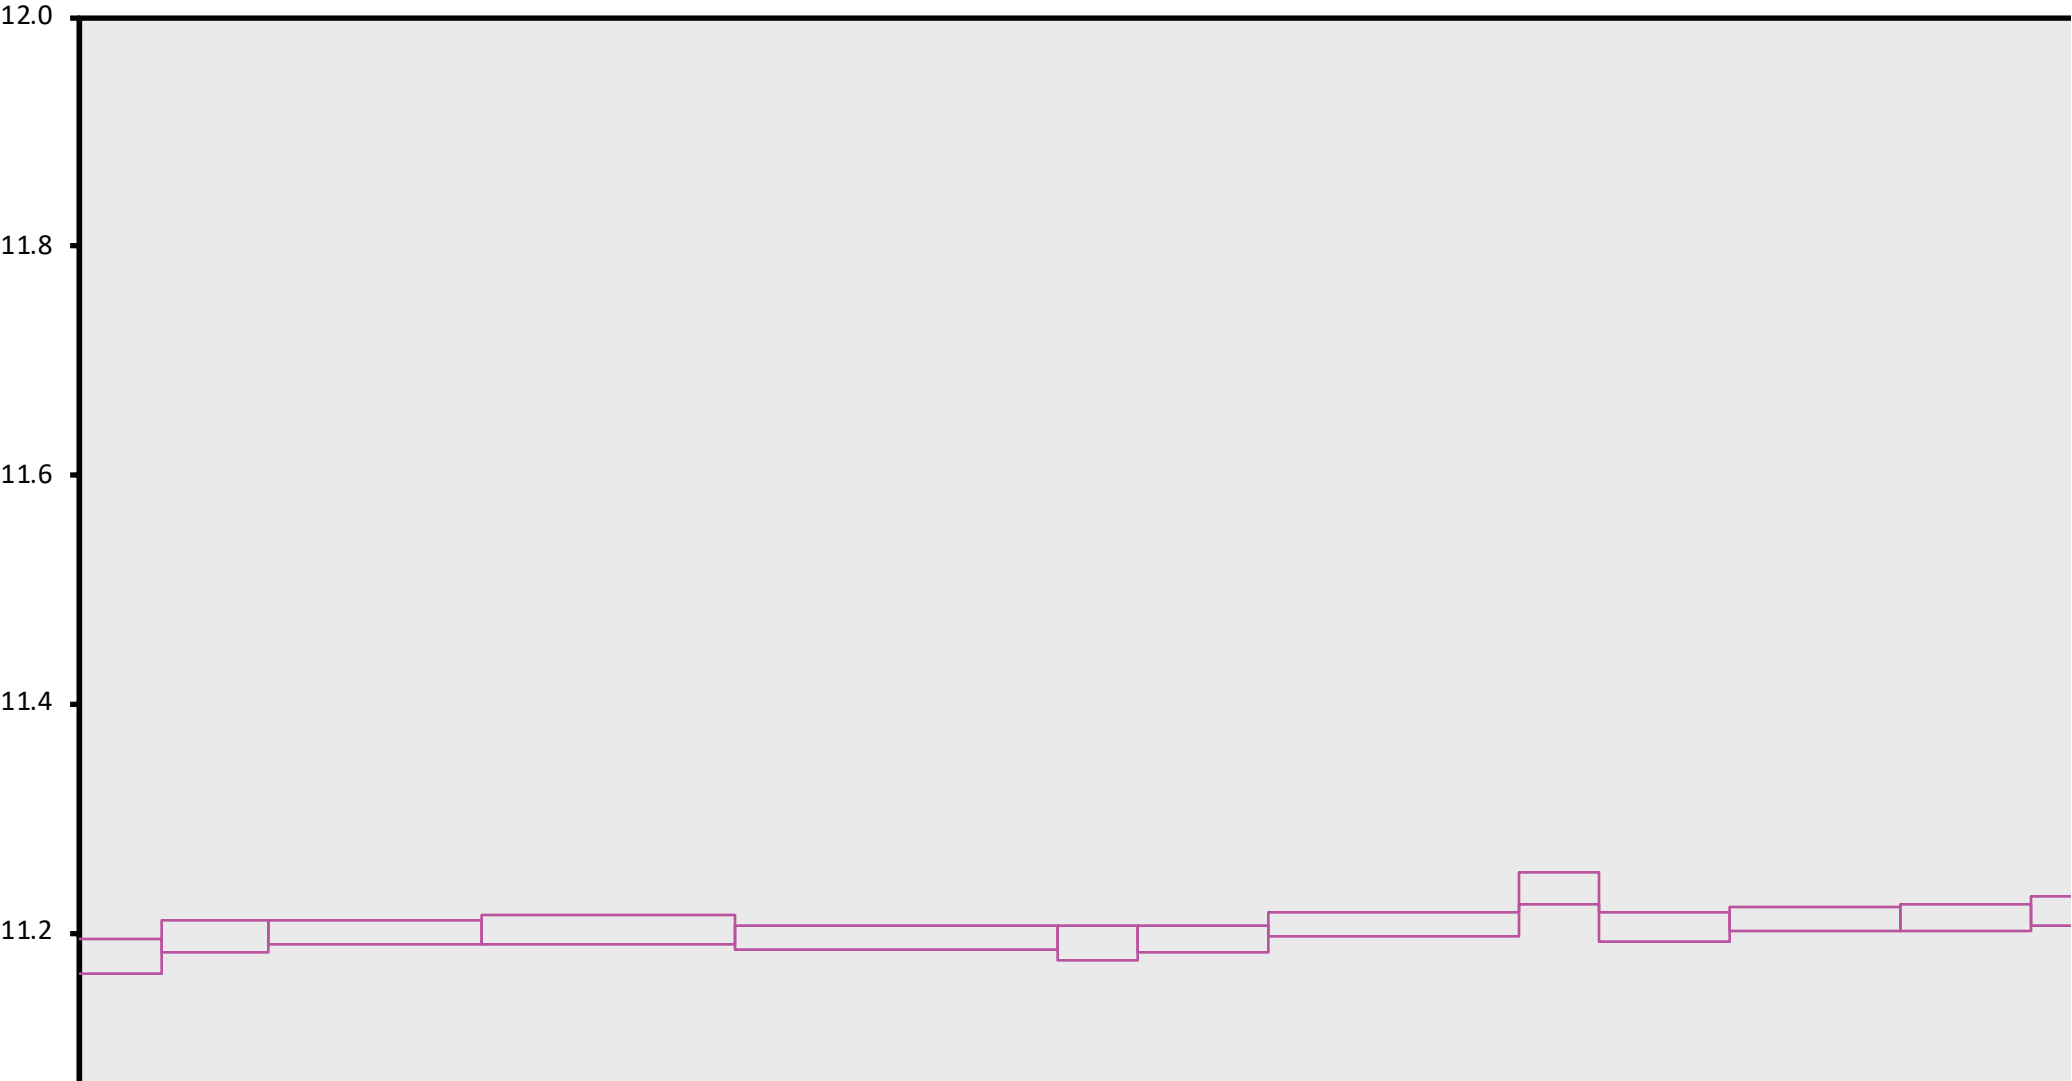



20F23283.AGE >>> VS19-098 >>> OREGON | SWENTON (20-01) PROJECT

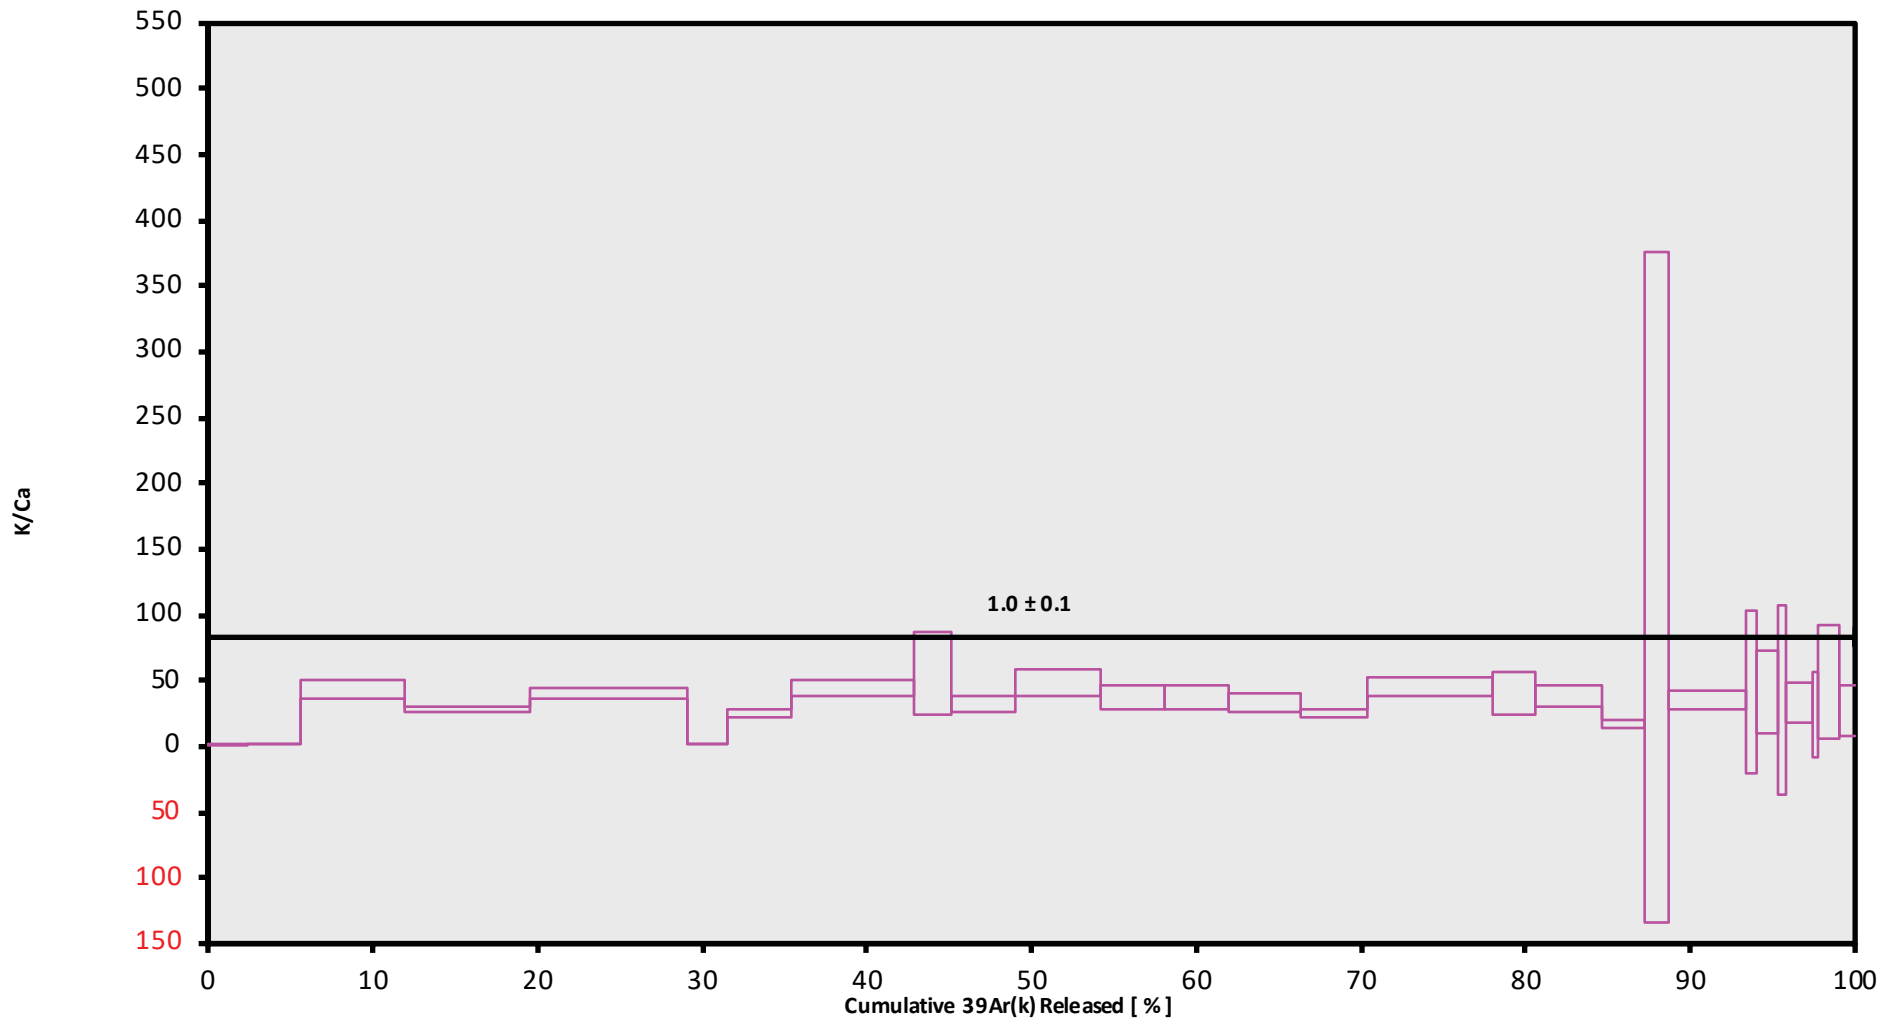

**Ar-Ages in Ma**

**WEIGHTED PLATEAU**  
 $11.21 \pm 0.03$

**TOTAL FUSION**  
 $11.20 \pm 0.03$

**NORMAL ISOCHRON**  
 $11.22 \pm 0.04$

**INVERSE ISOCHRON**  
 $11.21 \pm 0.03$

**Sample Info**

Sanidine  
Rhyolite Dome  
Dan Miggins

20F23283.AGE >>> VS19-098 >>> OREGON | SWENTON (20-01) PROJECT

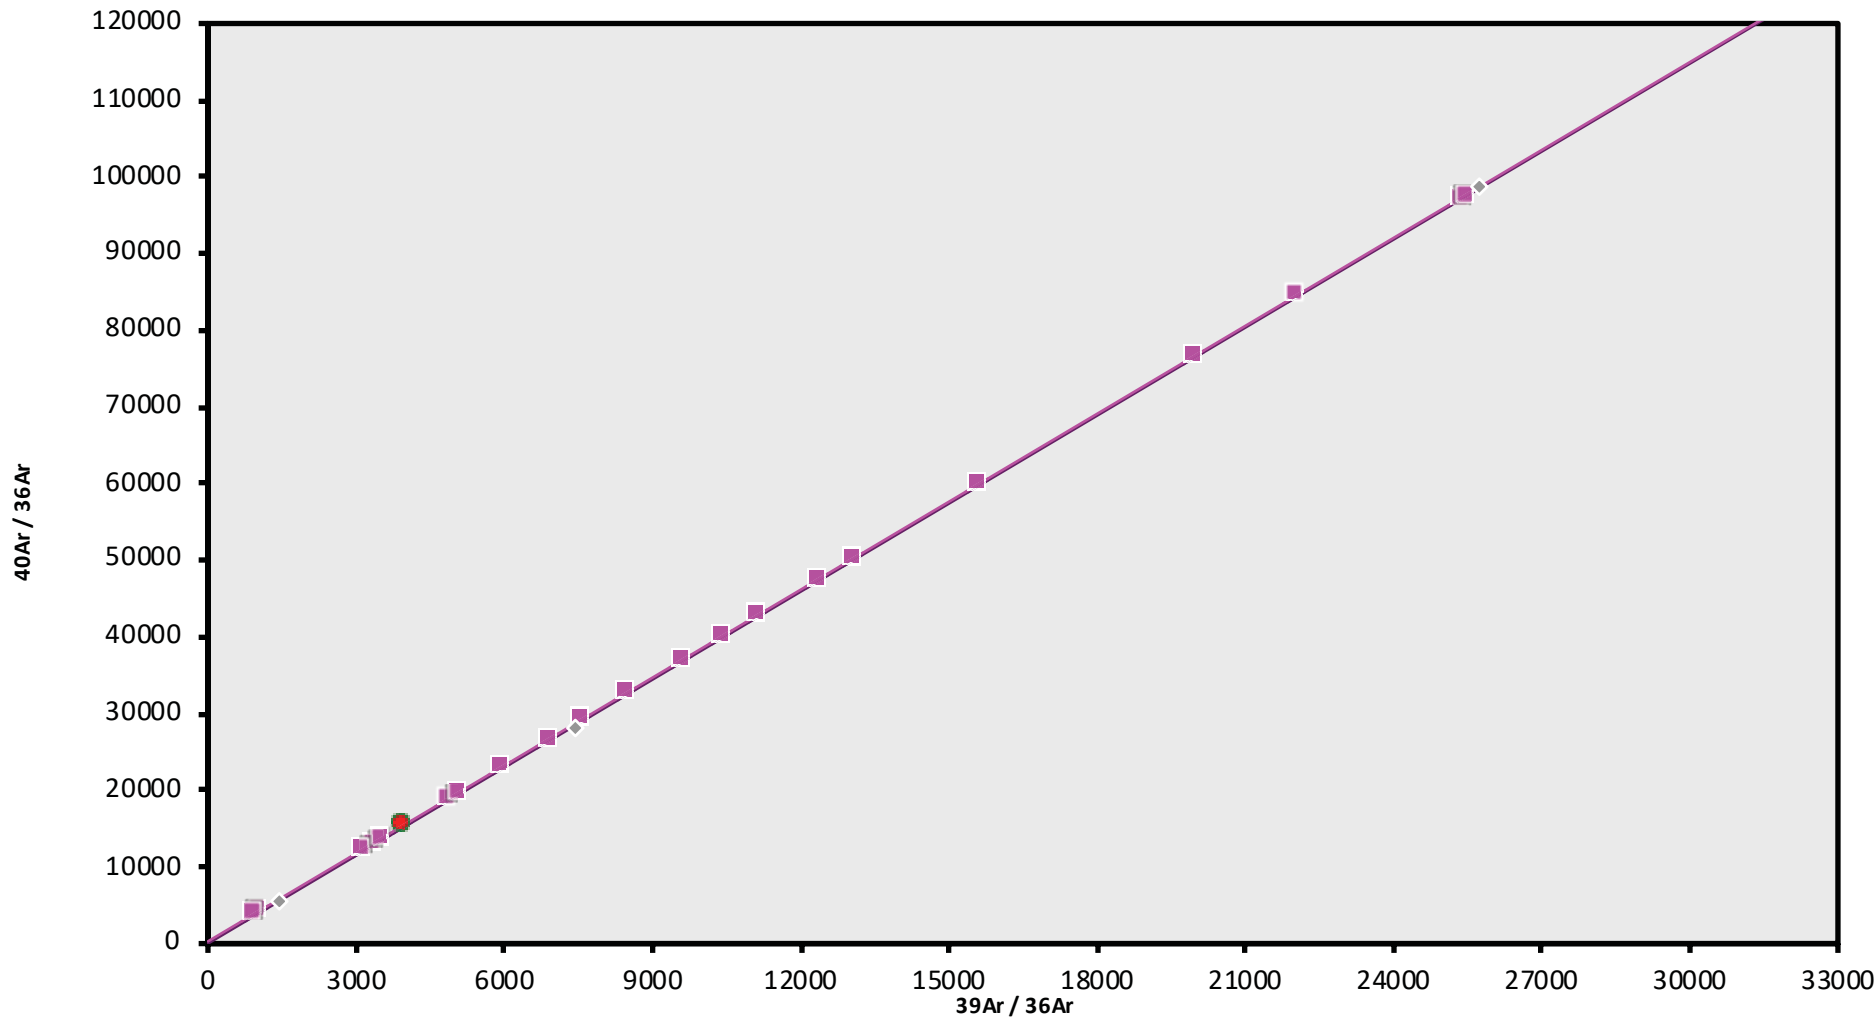

Ar-Ages in Ma

WEIGHTED PLATEAU

11.21 ± 0.03

TOTAL FUSION

11.20 ± 0.03

NORMAL ISOCHRON

11.22 ± 0.04

INVERSE ISOCHRON

11.21 ± 0.03

MSWD (PROBABILITY)

8.55 (0%)

Sample Info

Sanidine

Rhyolite Dome

Dan Miggins

20F23283.AGE >>> VS19-098 >>> OREGON | SWENTON (20-01) PROJECT

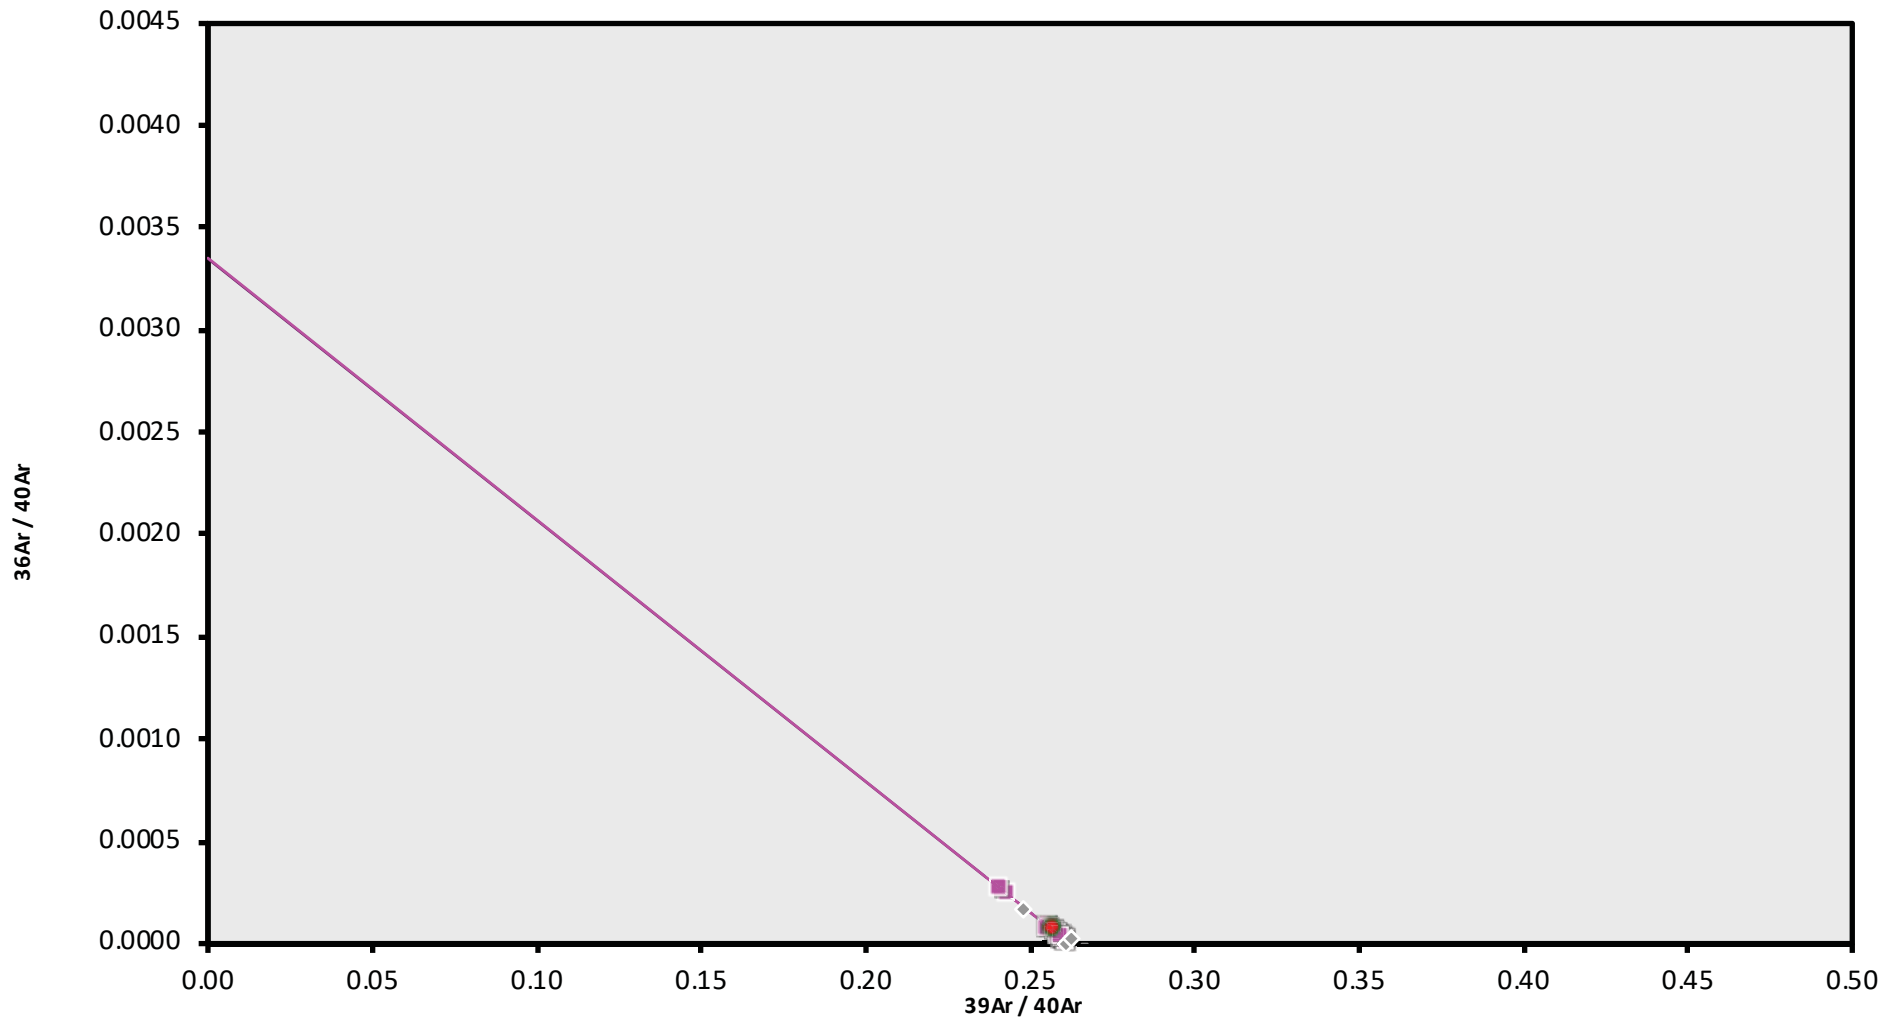

**Ar-Ages in Ma**

**WEIGHTED PLATEAU**  
**11.21 ± 0.03**

**TOTAL FUSION**  
**11.20 ± 0.03**

**NORMAL ISOCHRON**  
**11.22 ± 0.04**

**INVERSE ISOCHRON**  
**11.21 ± 0.03**

**MSWD (PROBABILITY)**  
**3.78 (0%)**

**Sample Info**

**Sanidine**  
**Rhyolite Dome**  
**Dan Miggins**

| Relative Abundances |        |   | 36Ar<br>[fA] | %1σ   | 37Ar<br>[fA] | %1σ    | 38Ar<br>[fA] | %1σ   | 39Ar<br>[fA] | %1σ   | 40Ar<br>[fA] | %1σ   | 40(r)/39(k) ± 2σ | Age ± 2σ<br>(ka) | 40Ar(r)<br>(%) | 39Ar(k)<br>(%) | K/Ca ± 2σ  |
|---------------------|--------|---|--------------|-------|--------------|--------|--------------|-------|--------------|-------|--------------|-------|------------------|------------------|----------------|----------------|------------|
| 20F23838            | 17.0 % | ✓ | 0.0141783    | 2.892 | 5.68191      | 2.306  | 6.25123      | 0.157 | 519.413      | 0.041 | 1973.593     | 0.003 | 3.79181 ±0.00318 | 11104.8 ±9.3     | 99.79          | 5.00           | 39.3 ±1.8  |
| 20F23839            | 17.0 % | ✓ | 0.0443579    | 1.104 | 5.65809      | 2.467  | 5.90620      | 0.186 | 489.735      | 0.041 | 1865.191     | 0.004 | 3.78188 ±0.00319 | 11075.8 ±9.3     | 99.30          | 4.72           | 37.2 ±1.8  |
| 20F23841            | 17.0 % | ✓ | 0.0161380    | 2.596 | 4.31282      | 3.014  | 4.58892      | 0.204 | 380.854      | 0.041 | 1445.250     | 0.004 | 3.78244 ±0.00322 | 11077.4 ±9.4     | 99.67          | 3.67           | 38.0 ±2.3  |
| 20F23842            | 17.0 % | ✓ | 0.0199549    | 2.082 | 2.65714      | 4.875  | 3.22499      | 0.292 | 267.780      | 0.042 | 1018.256     | 0.005 | 3.78055 ±0.00331 | 11071.9 ±9.7     | 99.42          | 2.58           | 43.3 ±4.2  |
| 20F23844            | 17.0 % | ✓ | 0.0244132    | 2.011 | 5.64612      | 2.214  | 6.94917      | 0.155 | 577.992      | 0.041 | 2195.067     | 0.003 | 3.78534 ±0.00317 | 11085.9 ±9.3     | 99.67          | 5.57           | 44.0 ±1.9  |
| 20F23845            | 17.0 % | ✓ | 0.0275887    | 1.719 | 7.97883      | 1.621  | 7.92015      | 0.151 | 660.096      | 0.041 | 2512.403     | 0.003 | 3.79404 ±0.00316 | 11111.3 ±9.2     | 99.68          | 6.36           | 35.6 ±1.2  |
| 20F23847            | 17.0 % | ✓ | 0.0423221    | 1.246 | 5.12525      | 2.692  | 5.94841      | 0.173 | 494.670      | 0.041 | 1887.004     | 0.004 | 3.78938 ±0.00320 | 11097.7 ±9.4     | 99.34          | 4.77           | 41.5 ±2.2  |
| 20F23848            | 17.0 % | ✓ | 0.0114788    | 3.465 | 2.05764      | 6.653  | 2.62166      | 0.338 | 216.186      | 0.042 | 820.343      | 0.005 | 3.77895 ±0.00338 | 11067.2 ±9.9     | 99.59          | 2.08           | 45.2 ±6.0  |
| 20F23850            | 17.0 % | ✓ | 0.0213731    | 1.826 | 3.53269      | 3.288  | 3.64551      | 0.263 | 302.561      | 0.042 | 1150.983     | 0.004 | 3.78340 ±0.00326 | 11080.2 ±9.5     | 99.45          | 2.91           | 36.8 ±2.4  |
| 20F23851            | 17.0 % | ✓ | 0.0121880    | 3.135 | 3.22155      | 3.736  | 3.64661      | 0.266 | 302.660      | 0.041 | 1148.034     | 0.004 | 3.78141 ±0.00324 | 11074.4 ±9.5     | 99.69          | 2.92           | 40.4 ±3.0  |
| 20F23853            | 17.0 % | ✓ | 0.0307316    | 1.312 | 4.39408      | 2.810  | 4.91782      | 0.211 | 408.318      | 0.041 | 1555.910     | 0.004 | 3.78835 ±0.00321 | 11094.7 ±9.4     | 99.42          | 3.93           | 40.0 ±2.2  |
| 20F23854            | 17.0 % | ✓ | 0.0241360    | 1.626 | 3.31226      | 3.912  | 3.38058      | 0.296 | 281.124      | 0.042 | 1072.839     | 0.005 | 3.79099 ±0.00329 | 11102.4 ±9.6     | 99.34          | 2.71           | 36.5 ±2.9  |
| 20F23856            | 17.0 % | ✓ | 0.0200215    | 1.965 | 4.16698      | 2.932  | 5.15095      | 0.189 | 428.321      | 0.041 | 1626.230     | 0.004 | 3.78300 ±0.00319 | 11079.0 ±9.3     | 99.64          | 4.13           | 44.2 ±2.6  |
| 20F23857            | 17.0 % | ✓ | 0.0127340    | 3.063 | 2.70000      | 4.852  | 3.04611      | 0.322 | 253.084      | 0.042 | 960.289      | 0.006 | 3.77961 ±0.00331 | 11069.1 ±9.7     | 99.61          | 2.44           | 40.3 ±3.9  |
| 20F23859            | 17.0 % | ✓ | 0.0098863    | 3.817 | 2.71252      | 4.958  | 3.06039      | 0.317 | 254.347      | 0.042 | 964.653      | 0.004 | 3.78134 ±0.00330 | 11074.2 ±9.6     | 99.70          | 2.45           | 40.3 ±4.0  |
| 20F23860            | 17.0 % | ✓ | 0.0159485    | 2.385 | 3.44828      | 4.014  | 4.00431      | 0.241 | 331.639      | 0.041 | 1261.495     | 0.004 | 3.78972 ±0.00324 | 11098.7 ±9.4     | 99.63          | 3.19           | 41.4 ±3.3  |
| 20F23862            | 17.0 % | ✓ | 0.0079172    | 4.635 | 3.64174      | 3.687  | 3.37099      | 0.304 | 280.803      | 0.042 | 1064.570     | 0.005 | 3.78322 ±0.00328 | 11079.7 ±9.6     | 99.79          | 2.71           | 33.2 ±2.4  |
| 20F23863            | 17.0 % | ✓ | 0.0130951    | 2.843 | 3.06461      | 4.142  | 3.42830      | 0.292 | 283.480      | 0.042 | 1077.075     | 0.005 | 3.78598 ±0.00327 | 11087.8 ±9.6     | 99.64          | 2.73           | 39.8 ±3.3  |
| 20F23865            | 17.0 % | ✓ | 0.0146785    | 2.484 | 3.17593      | 4.025  | 3.37320      | 0.280 | 277.932      | 0.042 | 1054.125     | 0.005 | 3.77732 ±0.00327 | 11062.5 ±9.6     | 99.59          | 2.68           | 37.6 ±3.0  |
| 20F23866            | 17.0 % | ✓ | 0.0196058    | 1.990 | 3.22818      | 3.977  | 3.14753      | 0.299 | 261.801      | 0.042 | 994.685      | 0.005 | 3.77746 ±0.00330 | 11062.9 ±9.6     | 99.42          | 2.52           | 34.9 ±2.8  |
| 20F23868            | 17.0 % | ✓ | 0.0096468    | 4.169 | 3.29633      | 4.131  | 3.70742      | 0.272 | 309.196      | 0.042 | 1171.594     | 0.004 | 3.78013 ±0.00325 | 11070.7 ±9.5     | 99.76          | 2.98           | 40.3 ±3.3  |
| 20F23869            | 17.0 % | ✓ | 0.0168288    | 2.395 | 2.39909      | 5.394  | 2.57752      | 0.386 | 214.861      | 0.042 | 816.010      | 0.005 | 3.77478 ±0.00339 | 11055.1 ±9.9     | 99.39          | 2.07           | 38.5 ±4.2  |
| 20F23871            | 17.0 % | ✓ | 0.0289999    | 1.448 | 3.66207      | 3.184  | 4.27638      | 0.239 | 354.241      | 0.041 | 1348.729     | 0.004 | 3.78318 ±0.00323 | 11079.6 ±9.4     | 99.36          | 3.41           | 41.6 ±2.6  |
| 20F23872            | 17.0 % | ✓ | 0.0418621    | 1.089 | 3.04310      | 4.079  | 3.57419      | 0.269 | 296.123      | 0.042 | 1131.697     | 0.004 | 3.77976 ±0.00330 | 11069.6 ±9.6     | 98.90          | 2.85           | 41.8 ±3.4  |
| 20F23874            | 17.0 % | ✓ | 0.0341395    | 1.317 | 0.73142      | 18.976 | 0.98418      | 0.988 | 81.327       | 0.043 | 318.387      | 0.010 | 3.78969 ±0.00475 | 11098.6 ±13.9    | 96.80          | 0.78           | 47.8 ±18.1 |
| 20F23875            | 17.0 % | ✓ | 0.0139413    | 2.782 | 2.75674      | 4.652  | 2.96991      | 0.318 | 246.030      | 0.042 | 934.828      | 0.005 | 3.78305 ±0.00332 | 11079.2 ±9.7     | 99.56          | 2.37           | 38.4 ±3.6  |
| 20F23877            | 17.0 % | ✓ | 0.0084238    | 3.809 | 3.70650      | 3.322  | 3.58754      | 0.262 | 297.545      | 0.042 | 1128.918     | 0.004 | 3.78608 ±0.00323 | 11088.1 ±9.4     | 99.79          | 2.87           | 34.5 ±2.3  |
| 20F23878            | 17.0 % | ✓ | 0.0318068    | 1.386 | 4.74680      | 2.561  | 5.01191      | 0.201 | 417.495      | 0.041 | 1590.303     | 0.003 | 3.78675 ±0.00321 | 11090.0 ±9.4     | 99.41          | 4.02           | 37.8 ±1.9  |
| 20F23880            | 17.0 % | ✓ | 0.0158283    | 2.650 | 4.81623      | 2.809  | 5.56391      | 0.194 | 461.358      | 0.041 | 1751.224     | 0.003 | 3.78582 ±0.00319 | 11087.3 ±9.3     | 99.74          | 4.44           | 41.2 ±2.3  |
| 20F23881            | 17.0 % | ✓ | 0.0224985    | 1.938 | 5.22206      | 2.543  | 5.16067      | 0.204 | 429.616      | 0.041 | 1635.465     | 0.003 | 3.79157 ±0.00320 | 11104.1 ±9.4     | 99.60          | 4.14           | 35.4 ±1.8  |
| Σ                   |        |   | 0.6267232    | 0.362 | 114.09697    | 0.621  | 124.99664    | 0.044 | 10380.589    | 0.008 | 39475.151    | 0.001 |                  |                  |                |                |            |

| Information on Analysis and Constants Used in Calculations |  |
|------------------------------------------------------------|--|
| Project = <b>SWENTON (20-01)</b>                           |  |
| Sample = <b>VS19-101</b>                                   |  |
| Material = <b>Sanidine</b>                                 |  |
| Location = <b>Rhyolite Dome</b>                            |  |
| Region = <b>Eastern Oregon</b>                             |  |
| Analyst = <b>Dan Miggins</b>                               |  |
| Irradiation = <b>20-OSU-01 (1C40-20)</b>                   |  |
| Position = <b>X: 0   Y: 0   Z/H: 49.45701 mm</b>           |  |
| FCT-NM Age = <b>28.201 ±0.023 Ma</b>                       |  |
| FCT-NM Reference = <b>Kuiper et al (2008)</b>              |  |
| FCT-NM 40Ar/39Ar Ratio = <b>9.67461 ±0.01490</b>           |  |
| FCT-NMJ-value = <b>0.00160477 ±0.00000247</b>              |  |
| Air Shot 40Ar/36Ar = <b>298.0960 ±0.3756</b>               |  |
| Air Shot MDF = <b>1.00038964 ±0.00040961 (LIN)</b>         |  |
| Experiment Type = <b>Total Fusion</b>                      |  |
| Extraction Method = <b>Single Crystal Laser Heating</b>    |  |
| Heating = <b>62 sec</b>                                    |  |
| Isolation = <b>1.62 min</b>                                |  |
| Instrument = <b>ARGUS-VI-F</b>                             |  |
| Preferred Age = <b>Ideogram Age</b>                        |  |
| Age Classification = <b>Eruption Age</b>                   |  |
| IGSN = <b>Undefined</b>                                    |  |
| Rock Class = <b>Undefined</b>                              |  |
| Lithology = <b>Undefined</b>                               |  |
| Lat-Lon = <b>Undefined - Undefined</b>                     |  |

| Results                         | 40(a)/36(a) ± 2σ             | 40(r)/39(k) ± 2σ        | Age ± 2σ<br>(ka)                                                                   | M\$WD                         | 39Ar(k)<br>(%,n)                                           | K/Ca ± 2σ |
|---------------------------------|------------------------------|-------------------------|------------------------------------------------------------------------------------|-------------------------------|------------------------------------------------------------|-----------|
| Age Plateau<br>Error Mean       |                              | 3.78425 ±0.00177 ±0.05% | <b>11082.7 ±34.4 ±0.31%</b><br>Full External Error ±576.3<br>Analytical Error ±5.2 | 8.72<br>0%<br>1.53<br>2.9531  | 100.00<br>30<br>2σ Confidence Limit<br>Error Magnification | 38.4 ±1.1 |
| Total Fusion Age                |                              | 3.78507 ±0.00062 ±0.02% | <b>11085.1 ±34.1 ±0.31%</b><br>Full External Error ±576.4<br>Analytical Error ±1.8 |                               | 30                                                         | 39.1 ±0.5 |
| Normal Isochron<br>Error Chron  | <b>275.91 ±37.64 ±13.64%</b> | 3.78660 ±0.00298 ±0.08% | <b>11089.6 ±35.1 ±0.32%</b><br>Full External Error ±576.7<br>Analytical Error ±8.7 | 10.36<br>0%<br>1.53<br>3.2190 | 100.00<br>30<br>2σ Confidence Limit<br>Error Magnification |           |
| Inverse Isochron<br>Error Chron | <b>303.66 ±33.70 ±11.10%</b> | 3.78395 ±0.00279 ±0.07% | <b>11081.8 ±35.0 ±0.32%</b><br>Full External Error ±576.3<br>Analytical Error ±8.2 | 9.01<br>0%<br>1.53<br>3.0018  | 100.00<br>30<br>2σ Confidence Limit<br>Error Magnification |           |
|                                 |                              |                         |                                                                                    | 0.0000006809                  | 4<br>Number of Iterations<br>Convergence                   |           |
|                                 |                              |                         |                                                                                    | 0.0000314010                  | 3%<br>Spreading Factor                                     |           |

| Incremental Heating |        |   | 36Ar(a)<br>[fA] | 37Ar(ca)<br>[fA] | 38Ar(cl)<br>[fA] | 39Ar(k)<br>[fA] | 40Ar(r)<br>[fA] | Age ± 2σ<br>(ka) | 40Ar(r)<br>(%) | 39Ar(k)<br>(%) | K/Ca ± 2σ  |
|---------------------|--------|---|-----------------|------------------|------------------|-----------------|-----------------|------------------|----------------|----------------|------------|
| 20F23838            | 17.0 % | ✓ | 0.0126424       | 5.68191          | 0.0000000        | 519.409         | 1969.503        | 11104.8 ±9.3     | 99.79          | 5.00           | 39.3 ±1.8  |
| 20F23839            | 17.0 % | ✓ | 0.0428285       | 5.65809          | 0.0000000        | 489.731         | 1852.107        | 11075.8 ±9.3     | 99.30          | 4.72           | 37.2 ±1.8  |
| 20F23841            | 17.0 % | ✓ | 0.0149723       | 4.31282          | 0.0000000        | 380.852         | 1440.548        | 11077.4 ±9.4     | 99.67          | 3.67           | 38.0 ±2.3  |
| 20F23842            | 17.0 % | ✓ | 0.0192367       | 2.65714          | 0.0000000        | 267.778         | 1012.350        | 11071.9 ±9.7     | 99.42          | 2.58           | 43.3 ±4.2  |
| 20F23844            | 17.0 % | ✓ | 0.0228870       | 5.64612          | 0.0000000        | 577.989         | 2187.883        | 11085.9 ±9.3     | 99.67          | 5.57           | 44.0 ±1.9  |
| 20F23845            | 17.0 % | ✓ | 0.0254320       | 7.97883          | 0.0000000        | 660.091         | 2504.410        | 11111.3 ±9.2     | 99.68          | 6.36           | 35.6 ±1.2  |
| 20F23847            | 17.0 % | ✓ | 0.0409367       | 5.12525          | 0.0000000        | 494.666         | 1874.481        | 11097.7 ±9.4     | 99.34          | 4.77           | 41.5 ±2.2  |
| 20F23848            | 17.0 % | ✓ | 0.0109207       | 2.05764          | 0.0083657        | 216.185         | 816.951         | 11067.2 ±9.9     | 99.59          | 2.08           | 45.2 ±6.0  |
| 20F23850            | 17.0 % | ✓ | 0.0204182       | 3.53269          | 0.0000000        | 302.559         | 1144.704        | 11080.2 ±9.5     | 99.45          | 2.91           | 36.8 ±2.4  |
| 20F23851            | 17.0 % | ✓ | 0.0113172       | 3.22155          | 0.0000000        | 302.658         | 1144.472        | 11074.4 ±9.5     | 99.69          | 2.92           | 40.4 ±3.0  |
| 20F23853            | 17.0 % | ✓ | 0.0295439       | 4.39408          | 0.0000000        | 408.315         | 1546.842        | 11094.7 ±9.4     | 99.42          | 3.93           | 40.0 ±2.2  |
| 20F23854            | 17.0 % | ✓ | 0.0232407       | 3.31226          | 0.0000000        | 281.122         | 1065.729        | 11102.4 ±9.6     | 99.34          | 2.71           | 36.5 ±2.9  |
| 20F23856            | 17.0 % | ✓ | 0.0188952       | 4.16698          | 0.0000000        | 428.319         | 1620.329        | 11079.0 ±9.3     | 99.64          | 4.13           | 44.2 ±2.6  |
| 20F23857            | 17.0 % | ✓ | 0.0120042       | 2.70000          | 0.0000000        | 253.082         | 956.552         | 11069.1 ±9.7     | 99.61          | 2.44           | 40.3 ±3.9  |
| 20F23859            | 17.0 % | ✓ | 0.0091531       | 2.71252          | 0.0000000        | 254.345         | 961.766         | 11074.2 ±9.6     | 99.70          | 2.45           | 40.3 ±4.0  |
| 20F23860            | 17.0 % | ✓ | 0.0150164       | 3.44828          | 0.0000000        | 331.637         | 1256.810        | 11098.7 ±9.4     | 99.63          | 3.19           | 41.4 ±3.3  |
| 20F23862            | 17.0 % | ✓ | 0.0069328       | 3.64174          | 0.0000000        | 280.800         | 1062.329        | 11079.7 ±9.6     | 99.79          | 2.71           | 33.2 ±2.4  |
| 20F23863            | 17.0 % | ✓ | 0.0122663       | 3.06461          | 0.0018780        | 283.478         | 1073.240        | 11087.8 ±9.6     | 99.64          | 2.73           | 39.8 ±3.3  |
| 20F23865            | 17.0 % | ✓ | 0.0138170       | 3.17593          | 0.0134655        | 277.930         | 1049.831        | 11062.5 ±9.6     | 99.59          | 2.68           | 37.6 ±3.0  |
| 20F23866            | 17.0 % | ✓ | 0.0187332       | 3.22818          | 0.0000000        | 261.799         | 988.933         | 11062.9 ±9.6     | 99.42          | 2.52           | 34.9 ±2.8  |
| 20F23868            | 17.0 % | ✓ | 0.0087558       | 3.29633          | 0.0000000        | 309.194         | 1168.792        | 11070.7 ±9.5     | 99.76          | 2.98           | 40.3 ±3.3  |
| 20F23869            | 17.0 % | ✓ | 0.0161803       | 2.39909          | 0.0000000        | 214.860         | 811.049         | 11055.1 ±9.9     | 99.39          | 2.07           | 38.5 ±4.2  |
| 20F23871            | 17.0 % | ✓ | 0.0280101       | 3.66207          | 0.0000000        | 354.239         | 1340.151        | 11079.6 ±9.4     | 99.36          | 3.41           | 41.6 ±2.6  |
| 20F23872            | 17.0 % | ✓ | 0.0410395       | 3.04310          | 0.0000000        | 296.121         | 1119.265        | 11069.6 ±9.6     | 98.90          | 2.85           | 41.8 ±3.4  |
| 20F23874            | 17.0 % | ✓ | 0.0339418       | 0.73142          | 0.0000000        | 81.327          | 308.204         | 11098.6 ±13.9    | 96.80          | 0.78           | 47.8 ±18.1 |
| 20F23875            | 17.0 % | ✓ | 0.0131961       | 2.75674          | 0.0000000        | 246.028         | 930.739         | 11079.2 ±9.7     | 99.56          | 2.37           | 38.4 ±3.6  |
| 20F23877            | 17.0 % | ✓ | 0.0074219       | 3.70650          | 0.0000000        | 297.543         | 1126.522        | 11088.1 ±9.4     | 99.79          | 2.87           | 34.5 ±2.3  |
| 20F23878            | 17.0 % | ✓ | 0.0305237       | 4.74680          | 0.0000000        | 417.491         | 1580.937        | 11090.0 ±9.4     | 99.41          | 4.02           | 37.8 ±1.9  |
| 20F23880            | 17.0 % | ✓ | 0.0145265       | 4.81623          | 0.0000000        | 461.355         | 1746.606        | 11087.3 ±9.3     | 99.74          | 4.44           | 41.2 ±2.3  |
| 20F23881            | 17.0 % | ✓ | 0.0210870       | 5.22206          | 0.0000000        | 429.613         | 1628.908        | 11104.1 ±9.4     | 99.60          | 4.14           | 35.4 ±1.8  |
| Σ                   |        |   | 0.5958774       | 114.09697        | 0.0237092        | 10380.516       | 39290.944       |                  |                |                |            |

| Information on Analysis                                                                                                                                                                                                                                 | Results                   | 40(r)/39(k) ± 2σ        | Age ± 2σ<br>(ka)                                                            | MSWD                         | 39Ar(k)<br>(%,n)                                           | K/Ca ± 2σ |
|---------------------------------------------------------------------------------------------------------------------------------------------------------------------------------------------------------------------------------------------------------|---------------------------|-------------------------|-----------------------------------------------------------------------------|------------------------------|------------------------------------------------------------|-----------|
| Project = SWENTON (20-01)<br>Sample = VS19-101<br>Material = Sanidine<br>Location = Rhyolite Dome<br>Region = Eastern Oregon<br>Analyst = Dan Miggins<br>Irradiation = 20-OSU-01 (1C40-20)<br>J = 0.00160477 ± 0.00000247<br>FCT-NM = 28.201 ± 0.023 Ma | Age Plateau<br>Error Mean | 3.78425 ±0.00177 ±0.05% | 11082.7 ±34.4 ±0.31%<br>Full External Error ±576.3<br>Analytical Error ±5.2 | 8.72<br>0%<br>1.53<br>2.9531 | 100.00<br>30<br>2σ Confidence Limit<br>Error Magnification | 38.4 ±1.1 |
|                                                                                                                                                                                                                                                         | Total Fusion Age          | 3.78507 ±0.00062 ±0.02% | 11085.1 ±34.1 ±0.31%<br>Full External Error ±576.4<br>Analytical Error ±1.8 |                              | 30                                                         | 39.1 ±0.5 |

| Normal Isochron |        |   | 39(k)/36(a) ± 2σ   | 40(a+r)/36(a) ± 2σ   | r.i.   |
|-----------------|--------|---|--------------------|----------------------|--------|
| 20F23838        | 17.0 % | ✓ | 41084.56 ± 2675.21 | 156083.52 ± 10162.52 | 0.9999 |
| 20F23839        | 17.0 % | ✓ | 11434.71 ± 262.47  | 43543.31 ± 998.86    | 0.9993 |
| 20F23841        | 17.0 % | ✓ | 25437.13 ± 1428.81 | 96513.00 ± 5420.58   | 0.9999 |
| 20F23842        | 17.0 % | ✓ | 13920.17 ± 603.52  | 52924.51 ± 2294.17   | 0.9998 |
| 20F23844        | 17.0 % | ✓ | 25254.01 ± 1086.05 | 95893.51 ± 4123.15   | 0.9998 |
| 20F23845        | 17.0 % | ✓ | 25955.07 ± 970.99  | 98773.11 ± 3694.24   | 0.9998 |
| 20F23847        | 17.0 % | ✓ | 12083.68 ± 312.32  | 46088.26 ± 1190.60   | 0.9995 |
| 20F23848        | 17.0 % | ✓ | 19795.78 ± 1448.21 | 75105.84 ± 5494.20   | 0.9999 |
| 20F23850        | 17.0 % | ✓ | 14818.07 ± 568.51  | 56361.33 ± 2161.85   | 0.9998 |
| 20F23851        | 17.0 % | ✓ | 26743.16 ± 1812.25 | 101425.31 ± 6872.59  | 0.9999 |
| 20F23853        | 17.0 % | ✓ | 13820.64 ± 378.82  | 52655.99 ± 1442.63   | 0.9995 |
| 20F23854        | 17.0 % | ✓ | 12096.13 ± 410.34  | 46154.82 ± 1565.25   | 0.9997 |
| 20F23856        | 17.0 % | ✓ | 22668.16 ± 947.53  | 86052.17 ± 3596.27   | 0.9998 |
| 20F23857        | 17.0 % | ✓ | 21082.76 ± 1375.98 | 79983.09 ± 5219.75   | 0.9999 |
| 20F23859        | 17.0 % | ✓ | 27787.83 ± 2301.79 | 105373.89 ± 8728.14  | 0.9999 |
| 20F23860        | 17.0 % | ✓ | 22084.93 ± 1124.32 | 83994.19 ± 4275.51   | 0.9999 |
| 20F23862        | 17.0 % | ✓ | 40502.89 ± 4308.51 | 153529.84 ± 16331.32 | 1.0000 |
| 20F23863        | 17.0 % | ✓ | 23110.35 ± 1408.81 | 87793.89 ± 5351.44   | 0.9999 |
| 20F23865        | 17.0 % | ✓ | 20115.05 ± 1066.54 | 76279.60 ± 4044.02   | 0.9999 |
| 20F23866        | 17.0 % | ✓ | 13975.09 ± 584.62  | 53088.86 ± 2220.44   | 0.9998 |
| 20F23868        | 17.0 % | ✓ | 35313.11 ± 3258.01 | 133786.79 ± 12342.77 | 1.0000 |
| 20F23869        | 17.0 % | ✓ | 13279.11 ± 664.11  | 50424.31 ± 2521.44   | 0.9999 |
| 20F23871        | 17.0 % | ✓ | 12646.84 ± 380.42  | 48143.88 ± 1447.65   | 0.9996 |
| 20F23872        | 17.0 % | ✓ | 7215.51 ± 160.80   | 27571.42 ± 614.02    | 0.9993 |
| 20F23874        | 17.0 % | ✓ | 2396.07 ± 63.75    | 9378.91 ± 249.42     | 0.9994 |
| 20F23875        | 17.0 % | ✓ | 18644.00 ± 1100.50 | 70829.84 ± 4180.45   | 0.9999 |
| 20F23877        | 17.0 % | ✓ | 40089.72 ± 3485.53 | 152081.54 ± 13221.87 | 1.0000 |
| 20F23878        | 17.0 % | ✓ | 13677.61 ± 396.41  | 52092.29 ± 1509.13   | 0.9996 |
| 20F23880        | 17.0 % | ✓ | 31759.59 ± 1841.24 | 120534.54 ± 6987.20  | 0.9999 |
| 20F23881        | 17.0 % | ✓ | 20373.37 ± 845.36  | 77545.63 ± 3217.00   | 0.9998 |

| Results         | 40(a)/36(a) ± 2σ      | 40(r)/39(k) ± 2σ  | Age ± 2σ (ka)               | MSWD            |
|-----------------|-----------------------|-------------------|-----------------------------|-----------------|
| Normal Isochron | 275.91 ± 37.64        | 3.78660 ± 0.00298 | 11089.6 ± 35.1              | 10.36           |
| Error Chron     | ± 13.64%              | ± 0.08%           | ± 0.32%                     | 0%              |
|                 |                       |                   | Full External Error ± 576.7 |                 |
|                 |                       |                   | Analytical Error ± 8.7      |                 |
|                 |                       |                   |                             |                 |
| Statistics      | 2σ Confidence Limit   | 1.53              | Convergence                 | 0.000000680891  |
|                 | Error Magnification   | 3.2190            | Number of Iterations        | 1               |
|                 | Number of Data Points | 30                | Calculated Line             | Weighted York-2 |

| Inverse Isochron |        |   | 39(k)/40(a+r) ± 2σ   | 36(a)/40(a+r) ± 2σ     | r.i.   |
|------------------|--------|---|----------------------|------------------------|--------|
| 20F23838         | 17.0 % | ✓ | 0.2632217 ±0.0002181 | 0.00000641 ±0.00000042 | 0.0001 |
| 20F23839         | 17.0 % | ✓ | 0.2626055 ±0.0002176 | 0.00002297 ±0.00000053 | 0.0004 |
| 20F23841         | 17.0 % | ✓ | 0.2635617 ±0.0002195 | 0.00001036 ±0.00000058 | 0.0001 |
| 20F23842         | 17.0 % | ✓ | 0.2630193 ±0.0002209 | 0.00001889 ±0.00000082 | 0.0003 |
| 20F23844         | 17.0 % | ✓ | 0.2633547 ±0.0002177 | 0.00001043 ±0.00000045 | 0.0001 |
| 20F23845         | 17.0 % | ✓ | 0.2627747 ±0.0002170 | 0.00001012 ±0.00000038 | 0.0001 |
| 20F23847         | 17.0 % | ✓ | 0.2621856 ±0.0002172 | 0.00002170 ±0.00000056 | 0.0003 |
| 20F23848         | 17.0 % | ✓ | 0.2635717 ±0.0002228 | 0.00001331 ±0.00000097 | 0.0002 |
| 20F23850         | 17.0 % | ✓ | 0.2629121 ±0.0002202 | 0.00001774 ±0.00000068 | 0.0003 |
| 20F23851         | 17.0 % | ✓ | 0.2636735 ±0.0002200 | 0.00000986 ±0.00000067 | 0.0001 |
| 20F23853         | 17.0 % | ✓ | 0.2624704 ±0.0002182 | 0.00001899 ±0.00000052 | 0.0003 |
| 20F23854         | 17.0 % | ✓ | 0.2620772 ±0.0002198 | 0.00002167 ±0.00000073 | 0.0004 |
| 20F23856         | 17.0 % | ✓ | 0.2634235 ±0.0002189 | 0.00001162 ±0.00000049 | 0.0002 |
| 20F23857         | 17.0 % | ✓ | 0.2635903 ±0.0002218 | 0.00001250 ±0.00000082 | 0.0002 |
| 20F23859         | 17.0 % | ✓ | 0.2637070 ±0.0002219 | 0.00000949 ±0.00000079 | 0.0001 |
| 20F23860         | 17.0 % | ✓ | 0.2629340 ±0.0002194 | 0.00001191 ±0.00000061 | 0.0002 |
| 20F23862         | 17.0 % | ✓ | 0.2638112 ±0.0002217 | 0.00000651 ±0.00000069 | 0.0001 |
| 20F23863         | 17.0 % | ✓ | 0.2632341 ±0.0002210 | 0.00001139 ±0.00000069 | 0.0002 |
| 20F23865         | 17.0 % | ✓ | 0.2637016 ±0.0002218 | 0.00001311 ±0.00000070 | 0.0002 |
| 20F23866         | 17.0 % | ✓ | 0.2632395 ±0.0002212 | 0.00001884 ±0.00000079 | 0.0003 |
| 20F23868         | 17.0 % | ✓ | 0.2639507 ±0.0002206 | 0.00000747 ±0.00000069 | 0.0001 |
| 20F23869         | 17.0 % | ✓ | 0.2633474 ±0.0002229 | 0.00001983 ±0.00000099 | 0.0003 |
| 20F23871         | 17.0 % | ✓ | 0.2626883 ±0.0002186 | 0.00002077 ±0.00000062 | 0.0003 |
| 20F23872         | 17.0 % | ✓ | 0.2617024 ±0.0002191 | 0.00003627 ±0.00000081 | 0.0004 |
| 20F23874         | 17.0 % | ✓ | 0.2554741 ±0.0002283 | 0.00010662 ±0.00000284 | 0.0018 |
| 20F23875         | 17.0 % | ✓ | 0.2632224 ±0.0002211 | 0.00001412 ±0.00000083 | 0.0002 |
| 20F23877         | 17.0 % | ✓ | 0.2636067 ±0.0002204 | 0.00000658 ±0.00000057 | 0.0001 |
| 20F23878         | 17.0 % | ✓ | 0.2625650 ±0.0002181 | 0.00001920 ±0.00000056 | 0.0002 |
| 20F23880         | 17.0 % | ✓ | 0.2634895 ±0.0002184 | 0.00000830 ±0.00000048 | 0.0001 |
| 20F23881         | 17.0 % | ✓ | 0.2627275 ±0.0002179 | 0.00001290 ±0.00000053 | 0.0002 |

| Results          | 40(a)/36(a) ± 2σ      | 40(r)/39(k) ± 2σ | Age ± 2σ (ka)              | MSWD            |
|------------------|-----------------------|------------------|----------------------------|-----------------|
| Inverse Isochron | 303.66 ±33.70         | 3.78395 ±0.00279 | 11081.8 ±35.0              | 9.01            |
| Error Chron      | ±11.10%               | ±0.07%           | ±0.32%                     | 0%              |
|                  |                       |                  | Full External Error ±576.3 |                 |
|                  |                       |                  | Analytical Error ±8.2      |                 |
|                  |                       |                  |                            |                 |
| Statistics       | 2σ Confidence Limit   | 1.53             | Convergence                | 0.0000314010    |
|                  | Error Magnification   | 3.0018           | Number of Iterations       | 4               |
|                  | Number of Data Points | 30               | Calculated Line            | Weighted York-2 |
|                  | Spreading Factor      | 3.2%             |                            |                 |

| Degassing Patterns |        | 36Ar(a) |           | 36Ar(c) |            | %1σ  | 36Ar(ca)  |       | 36Ar(cl)   |        | %1σ     | 37Ar(ca) |           | %1σ  | 38Ar(a)    |      | %1σ     | 38Ar(c) |           | %1σ   | 38Ar(k)    |        | %1σ     | 38Ar(ca) |           | %1σ   | 38Ar(cl) |      | %1σ      | 39Ar(k) |            | %1σ  | 39Ar(ca)  |      | %1σ | 40Ar(r) |     | %1σ | 40Ar(a) |     | %1σ | 40Ar(c) |     | %1σ | 40Ar(k) |     | %1σ |
|--------------------|--------|---------|-----------|---------|------------|------|-----------|-------|------------|--------|---------|----------|-----------|------|------------|------|---------|---------|-----------|-------|------------|--------|---------|----------|-----------|-------|----------|------|----------|---------|------------|------|-----------|------|-----|---------|-----|-----|---------|-----|-----|---------|-----|-----|---------|-----|-----|
|                    |        | [fA]    | %1σ       | [fA]    | %1σ        |      | [fA]      | %1σ   | [fA]       | %1σ    |         | [fA]     | %1σ       |      | [fA]       | %1σ  |         | [fA]    | %1σ       |       | [fA]       | %1σ    |         | [fA]     | %1σ       |       | [fA]     | %1σ  |          | [fA]    | %1σ        |      | [fA]      | %1σ  |     | [fA]    | %1σ |     | [fA]    | %1σ |     | [fA]    | %1σ |     | [fA]    | %1σ |     |
| 20F23838           | 17.0 % | ✓       | 0.0126424 | 3.26    | 0.00000000 | 0.00 | 0.0015358 | 2.31  | 0.00000000 | 0.00   | 5.68191 | 2.31     | 0.0023831 | 3.26 | 0.00000000 | 0.00 | 6.27291 | 0.10    | 0.0010227 | 9.90  | 0.00000000 | 0.00   | 519.409 | 0.04     | 0.0036506 | 2.48  | 1969.503 | 0.01 | 3.77453  | 3.26    | 0.00000000 | 0.00 | 0.3152815 | 9.65 |     |         |     |     |         |     |     |         |     |     |         |     |     |
| 20F23839           | 17.0 % | ✓       | 0.0428285 | 1.15    | 0.00000000 | 0.00 | 0.0015294 | 2.47  | 0.00000000 | 0.00   | 5.65809 | 2.47     | 0.0080732 | 1.16 | 0.00000000 | 0.00 | 5.91449 | 0.10    | 0.0010185 | 9.94  | 0.00000000 | 0.00   | 489.731 | 0.04     | 0.0036353 | 2.63  | 1852.107 | 0.01 | 12.78687 | 1.15    | 0.00000000 | 0.00 | 0.2972670 | 9.65 |     |         |     |     |         |     |     |         |     |     |         |     |     |
| 20F23841           | 17.0 % | ✓       | 0.0149723 | 2.81    | 0.00000000 | 0.00 | 0.0011658 | 3.02  | 0.00000000 | 0.00   | 4.31282 | 3.01     | 0.0028223 | 2.81 | 0.00000000 | 0.00 | 4.59954 | 0.10    | 0.0007763 | 10.09 | 0.00000000 | 0.00   | 380.852 | 0.04     | 0.0027710 | 3.15  | 1440.548 | 0.01 | 4.47012  | 2.81    | 0.00000000 | 0.00 | 0.2311769 | 9.65 |     |         |     |     |         |     |     |         |     |     |         |     |     |
| 20F23842           | 17.0 % | ✓       | 0.0192367 | 2.17    | 0.00000000 | 0.00 | 0.0007182 | 4.88  | 0.00000000 | 0.00   | 2.65714 | 4.87     | 0.0036261 | 2.17 | 0.00000000 | 0.00 | 3.23396 | 0.10    | 0.0004783 | 10.79 | 0.00000000 | 0.00   | 267.778 | 0.04     | 0.0017072 | 4.96  | 1012.350 | 0.01 | 5.74331  | 2.17    | 0.00000000 | 0.00 | 0.1625413 | 9.65 |     |         |     |     |         |     |     |         |     |     |         |     |     |
| 20F23844           | 17.0 % | ✓       | 0.0228870 | 2.15    | 0.00000000 | 0.00 | 0.0015261 | 2.22  | 0.00000000 | 0.00   | 5.64612 | 2.21     | 0.0043142 | 2.16 | 0.00000000 | 0.00 | 6.98037 | 0.10    | 0.0010163 | 9.88  | 0.00000000 | 0.00   | 577.989 | 0.04     | 0.0036276 | 2.40  | 2187.883 | 0.01 | 6.83315  | 2.15    | 0.00000000 | 0.00 | 0.3508392 | 9.65 |     |         |     |     |         |     |     |         |     |     |         |     |     |
| 20F23845           | 17.0 % | ✓       | 0.0254320 | 1.87    | 0.00000000 | 0.00 | 0.0021567 | 1.63  | 0.00000000 | 0.00   | 7.97883 | 1.62     | 0.0047939 | 1.88 | 0.00000000 | 0.00 | 7.97192 | 0.10    | 0.0014362 | 9.77  | 0.00000000 | 0.00   | 660.091 | 0.04     | 0.0051264 | 1.86  | 2504.410 | 0.01 | 7.59299  | 1.87    | 0.00000000 | 0.00 | 0.4006750 | 9.65 |     |         |     |     |         |     |     |         |     |     |         |     |     |
| 20F23847           | 17.0 % | ✓       | 0.0409367 | 1.29    | 0.00000000 | 0.00 | 0.0013854 | 2.70  | 0.00000000 | 0.00   | 5.12525 | 2.69     | 0.0077166 | 1.30 | 0.00000000 | 0.00 | 5.97409 | 0.10    | 0.0009225 | 10.00 | 0.00000000 | 0.00   | 494.666 | 0.04     | 0.0032930 | 2.84  | 1874.481 | 0.01 | 12.22207 | 1.30    | 0.00000000 | 0.00 | 0.3002626 | 9.65 |     |         |     |     |         |     |     |         |     |     |         |     |     |
| 20F23848           | 17.0 % | ✓       | 0.0109207 | 3.66    | 0.00000000 | 0.00 | 0.0005562 | 6.66  | 0.00000019 | 130.90 | 2.05764 | 6.65     | 0.0020586 | 3.66 | 0.00000000 | 0.00 | 2.61086 | 0.10    | 0.0003704 | 11.70 | 0.0083657  | 130.91 | 216.185 | 0.04     | 0.0013220 | 6.72  | 116.951  | 0.02 | 3.26050  | 3.66    | 0.00000000 | 0.00 | 0.1312241 | 9.65 |     |         |     |     |         |     |     |         |     |     |         |     |     |
| 20F23850           | 17.0 % | ✓       | 0.0204182 | 1.92    | 0.00000000 | 0.00 | 0.0009549 | 3.29  | 0.00000000 | 0.00   | 3.53269 | 3.29     | 0.0038488 | 1.92 | 0.00000000 | 0.00 | 3.65401 | 0.10    | 0.0006359 | 10.18 | 0.00000000 | 0.00   | 302.559 | 0.04     | 0.0022698 | 3.41  | 1144.704 | 0.01 | 6.09607  | 1.92    | 0.00000000 | 0.00 | 0.1836534 | 9.65 |     |         |     |     |         |     |     |         |     |     |         |     |     |
| 20F23851           | 17.0 % | ✓       | 0.0113172 | 3.39    | 0.00000000 | 0.00 | 0.0008708 | 3.74  | 0.00000000 | 0.00   | 3.22155 | 3.74     | 0.0021333 | 3.39 | 0.00000000 | 0.00 | 3.65520 | 0.10    | 0.0005799 | 10.33 | 0.00000000 | 0.00   | 302.658 | 0.04     | 0.0020698 | 3.85  | 1144.472 | 0.01 | 3.37886  | 3.39    | 0.00000000 | 0.00 | 0.1837133 | 9.65 |     |         |     |     |         |     |     |         |     |     |         |     |     |
| 20F23853           | 17.0 % | ✓       | 0.0295439 | 1.37    | 0.00000000 | 0.00 | 0.0011877 | 2.81  | 0.00000000 | 0.00   | 4.39408 | 2.81     | 0.0055690 | 1.38 | 0.00000000 | 0.00 | 4.93122 | 0.10    | 0.0007909 | 10.03 | 0.00000000 | 0.00   | 408.315 | 0.04     | 0.0028232 | 2.96  | 1546.842 | 0.01 | 8.82062  | 1.37    | 0.00000000 | 0.00 | 0.2478474 | 9.65 |     |         |     |     |         |     |     |         |     |     |         |     |     |
| 20F23854           | 17.0 % | ✓       | 0.0232407 | 1.70    | 0.00000000 | 0.00 | 0.0008953 | 3.92  | 0.00000000 | 0.00   | 3.31226 | 3.91     | 0.0043809 | 1.70 | 0.00000000 | 0.00 | 3.39511 | 0.10    | 0.0005962 | 10.39 | 0.00000000 | 0.00   | 281.122 | 0.04     | 0.0021281 | 4.02  | 1065.729 | 0.01 | 6.93873  | 1.70    | 0.00000000 | 0.00 | 0.1706410 | 9.65 |     |         |     |     |         |     |     |         |     |     |         |     |     |
| 20F23856           | 17.0 % | ✓       | 0.0188952 | 2.09    | 0.00000000 | 0.00 | 0.0011263 | 2.94  | 0.00000000 | 0.00   | 4.16698 | 2.93     | 0.0035617 | 2.10 | 0.00000000 | 0.00 | 5.17281 | 0.10    | 0.0007501 | 10.07 | 0.00000000 | 0.00   | 428.319 | 0.04     | 0.0026773 | 3.07  | 1620.329 | 0.01 | 5.64134  | 2.09    | 0.00000000 | 0.00 | 0.2599895 | 9.65 |     |         |     |     |         |     |     |         |     |     |         |     |     |
| 20F23857           | 17.0 % | ✓       | 0.0120042 | 3.26    | 0.00000000 | 0.00 | 0.0007298 | 4.86  | 0.00000000 | 0.00   | 2.70000 | 4.85     | 0.0022628 | 3.27 | 0.00000000 | 0.00 | 3.05648 | 0.10    | 0.0004860 | 10.78 | 0.00000000 | 0.00   | 253.082 | 0.04     | 0.0017347 | 4.94  | 956.552  | 0.01 | 3.58398  | 3.26    | 0.00000000 | 0.00 | 0.1536210 | 9.65 |     |         |     |     |         |     |     |         |     |     |         |     |     |
| 20F23859           | 17.0 % | ✓       | 0.0091531 | 4.14    | 0.00000000 | 0.00 | 0.0007332 | 4.96  | 0.00000000 | 0.00   | 2.71252 | 4.96     | 0.0017254 | 4.14 | 0.00000000 | 0.00 | 3.07173 | 0.10    | 0.0004883 | 10.83 | 0.00000000 | 0.00   | 254.345 | 0.04     | 0.0017428 | 5.04  | 961.766  | 0.01 | 2.73275  | 4.14    | 0.00000000 | 0.00 | 0.1543875 | 9.65 |     |         |     |     |         |     |     |         |     |     |         |     |     |
| 20F23860           | 17.0 % | ✓       | 0.0150164 | 2.55    | 0.00000000 | 0.00 | 0.0009321 | 4.02  | 0.00000000 | 0.00   | 3.44828 | 4.01     | 0.0028306 | 2.55 | 0.00000000 | 0.00 | 4.00518 | 0.10    | 0.0006207 | 10.43 | 0.00000000 | 0.00   | 331.637 | 0.04     | 0.0022155 | 4.12  | 1256.810 | 0.01 | 4.48331  | 2.55    | 0.00000000 | 0.00 | 0.2013037 | 9.65 |     |         |     |     |         |     |     |         |     |     |         |     |     |
| 20F23862           | 17.0 % | ✓       | 0.0069328 | 5.32    | 0.00000000 | 0.00 | 0.0009844 | 3.69  | 0.00000000 | 0.00   | 3.64174 | 3.69     | 0.0013068 | 5.32 | 0.00000000 | 0.00 | 3.39123 | 0.10    | 0.0006555 | 10.31 | 0.00000000 | 0.00   | 280.800 | 0.04     | 0.0023398 | 3.80  | 1062.329 | 0.01 | 2.06987  | 5.32    | 0.00000000 | 0.00 | 0.1704459 | 9.65 |     |         |     |     |         |     |     |         |     |     |         |     |     |
| 20F23863           | 17.0 % | ✓       | 0.0122663 | 3.05    | 0.00000000 | 0.00 | 0.0008284 | 4.15  | 0.00000004 | 696.70 | 3.06461 | 4.14     | 0.0023122 | 3.05 | 0.00000000 | 0.00 | 3.42356 | 0.10    | 0.0005516 | 10.48 | 0.0018780  | 696.70 | 283.478 | 0.04     | 0.0019690 | 4.24  | 1073.240 | 0.01 | 3.66221  | 3.05    | 0.00000000 | 0.00 | 0.1720709 | 9.65 |     |         |     |     |         |     |     |         |     |     |         |     |     |
| 20F23865           | 17.0 % | ✓       | 0.0138170 | 2.65    | 0.00000000 | 0.00 | 0.0008585 | 4.03  | 0.00000031 | 93.28  | 3.17593 | 4.02     | 0.0026045 | 2.66 | 0.00000000 | 0.00 | 3.35656 | 0.10    | 0.0005717 | 10.44 | 0.0134655  | 93.29  | 277.930 | 0.04     | 0.0020405 | 4.13  | 1049.831 | 0.01 | 4.12521  | 2.65    | 0.00000000 | 0.00 | 0.1687034 | 9.65 |     |         |     |     |         |     |     |         |     |     |         |     |     |
| 20F23866           | 17.0 % | ✓       | 0.0187332 | 2.09    | 0.00000000 | 0.00 | 0.0008726 | 3.98  | 0.00000000 | 0.00   | 3.22818 | 3.98     | 0.0035312 | 2.10 | 0.00000000 | 0.00 | 3.16174 | 0.10    | 0.0005811 | 10.42 | 0.00000000 | 0.00   | 261.799 | 0.04     | 0.0020741 | 4.08  | 988.933  | 0.01 | 5.59300  | 2.09    | 0.00000000 | 0.00 | 0.1589118 | 9.65 |     |         |     |     |         |     |     |         |     |     |         |     |     |
| 20F23868           | 17.0 % | ✓       | 0.0087558 | 4.61    | 0.00000000 | 0.00 | 0.0008910 | 4.13  | 0.00000000 | 0.00   | 3.29633 | 4.13     | 0.0016505 | 4.62 | 0.00000000 | 0.00 | 3.73413 | 0.10    | 0.0005933 | 10.48 | 0.00000000 | 0.00   | 309.194 | 0.04     | 0.0021179 | 4.23  | 1168.792 | 0.01 | 2.61412  | 4.61    | 0.00000000 | 0.00 | 0.1876805 | 9.65 |     |         |     |     |         |     |     |         |     |     |         |     |     |
| 20F23869           | 17.0 % | ✓       | 0.0161803 | 2.50    | 0.00000000 | 0.00 | 0.0006485 | 5.40  | 0.00000000 | 0.00   | 2.39909 | 5.39     | 0.0030500 | 2.51 | 0.00000000 | 0.00 | 2.59486 | 0.10    | 0.0004318 | 11.04 | 0.00000000 | 0.00   | 214.860 | 0.04     | 0.0015414 | 5.47  | 811.049  | 0.02 | 4.83079  | 2.50    | 0.00000000 | 0.00 | 0.1304199 | 9.65 |     |         |     |     |         |     |     |         |     |     |         |     |     |
| 20F23871           | 17.0 % | ✓       | 0.0280101 | 1.50    | 0.00000000 | 0.00 | 0.0009899 | 3.19  | 0.00000000 | 0.00   | 3.66207 | 3.18     | 0.0052799 | 1.51 | 0.00000000 | 0.00 | 4.27814 | 0.10    | 0.0006592 | 10.14 | 0.00000000 | 0.00   | 354.239 | 0.04     | 0.0023529 | 3.31  | 1340.151 | 0.01 | 8.36269  | 1.51    | 0.00000000 | 0.00 | 0.2150229 | 9.65 |     |         |     |     |         |     |     |         |     |     |         |     |     |
| 20F23872           | 17.0 % | ✓       | 0.0410395 | 1.11    | 0.00000000 | 0.00 | 0.0008225 | 4.08  | 0.00000000 | 0.00   | 3.04310 | 4.08     | 0.0077359 | 1.12 | 0.00000000 | 0.00 | 3.57625 | 0.10    | 0.0005478 | 10.46 | 0.00000000 | 0.00   | 296.121 | 0.04     | 0.0019552 | 4.18  | 1119.265 | 0.01 | 12.25276 | 1.12    | 0.00000000 | 0.00 | 0.1797454 | 9.65 |     |         |     |     |         |     |     |         |     |     |         |     |     |
| 20F23874           | 17.0 % | ✓       | 0.0339418 | 1.33    | 0.00000000 | 0.00 | 0.0001977 | 18.98 | 0.00000000 | 0.00   | 0.73142 | 18.98    | 0.0063980 | 1.34 | 0.00000000 | 0.00 | 0.98219 | 0.10    | 0.0001317 | 21.28 | 0.00000000 | 0.00   | 81.327  | 0.04     | 0.0004699 | 19.00 | 308.204  | 0.05 | 10.13367 | 1.33    | 0.00000000 | 0.00 | 0.0493654 | 9.65 |     |         |     |     |         |     |     |         |     |     |         |     |     |
| 20F23875           | 17.0 % | ✓       | 0.0131961 | 2.95    | 0.00000000 | 0.00 | 0.0007451 | 4.66  | 0.00000000 | 0.00   | 2.75674 | 4.65     | 0.0024875 | 2.96 | 0.00000000 | 0.00 | 2.97129 | 0.10    | 0.0004962 | 10.69 | 0.00000000 | 0.00   | 246.028 | 0.04     | 0.0017712 | 4.74  | 930.739  | 0.01 | 3.93983  | 2.95    | 0.00000000 | 0.00 | 0.1493393 | 9.65 |     |         |     |     |         |     |     |         |     |     |         |     |     |
| 20F23877           | 17.0 % | ✓       | 0.0074219 | 4.35    | 0.00000000 | 0.00 | 0.0010019 | 3.33  | 0.00000000 | 0.00   | 3.70650 | 3.32     | 0.0013990 | 4.35 | 0.00000000 | 0.00 | 3.59342 | 0.10    | 0.0006672 | 10.19 | 0.00000000 | 0.00   | 297.543 | 0.04     | 0.0023814 | 3.45  | 1126.522 | 0.01 |          |         |            |      |           |      |     |         |     |     |         |     |     |         |     |     |         |     |     |



| Additional Parameters |        |   | 40Ar/39Ar | 1σ       | 37Ar/39Ar | 1σ       | 36Ar/39Ar | 1σ       | Time (days) | 37Ar (decay) | 39Ar (decay) | 40Ar (moles) |
|-----------------------|--------|---|-----------|----------|-----------|----------|-----------|----------|-------------|--------------|--------------|--------------|
| 20F23838              | 17.0 % | ✓ | 3.799660  | 0.001573 | 0.010939  | 0.000252 | 0.000027  | 0.000001 | 139.984     | 15.917713    | 1.00098910   | 6.987E-11    |
| 20F23839              | 17.0 % | ✓ | 3.808572  | 0.001577 | 0.011553  | 0.000285 | 0.000091  | 0.000001 | 139.990     | 15.919460    | 1.00098914   | 6.603E-11    |
| 20F23841              | 17.0 % | ✓ | 3.794757  | 0.001579 | 0.011324  | 0.000341 | 0.000042  | 0.000001 | 140.001     | 15.923172    | 1.00098922   | 5.116E-11    |
| 20F23842              | 17.0 % | ✓ | 3.802585  | 0.001595 | 0.009923  | 0.000484 | 0.000075  | 0.000002 | 140.008     | 15.925138    | 1.00098926   | 3.605E-11    |
| 20F23844              | 17.0 % | ✓ | 3.797743  | 0.001569 | 0.009769  | 0.000216 | 0.000042  | 0.000001 | 140.019     | 15.928852    | 1.00098935   | 7.771E-11    |
| 20F23845              | 17.0 % | ✓ | 3.806119  | 0.001571 | 0.012087  | 0.000196 | 0.000042  | 0.000001 | 140.026     | 15.930818    | 1.00098939   | 8.894E-11    |
| 20F23847              | 17.0 % | ✓ | 3.814673  | 0.001579 | 0.010361  | 0.000279 | 0.000086  | 0.000001 | 140.037     | 15.934534    | 1.00098948   | 6.680E-11    |
| 20F23848              | 17.0 % | ✓ | 3.794617  | 0.001603 | 0.009518  | 0.000633 | 0.000053  | 0.000002 | 140.043     | 15.936282    | 1.00098952   | 2.904E-11    |
| 20F23850              | 17.0 % | ✓ | 3.804132  | 0.001592 | 0.011676  | 0.000384 | 0.000071  | 0.000001 | 140.056     | 15.940217    | 1.00098960   | 4.074E-11    |
| 20F23851              | 17.0 % | ✓ | 3.793150  | 0.001581 | 0.010644  | 0.000398 | 0.000040  | 0.000001 | 140.061     | 15.941967    | 1.00098964   | 4.064E-11    |
| 20F23853              | 17.0 % | ✓ | 3.810535  | 0.001583 | 0.010761  | 0.000302 | 0.000075  | 0.000001 | 140.073     | 15.945685    | 1.00098973   | 5.508E-11    |
| 20F23854              | 17.0 % | ✓ | 3.816247  | 0.001599 | 0.011782  | 0.000461 | 0.000086  | 0.000001 | 140.079     | 15.947653    | 1.00098977   | 3.798E-11    |
| 20F23856              | 17.0 % | ✓ | 3.796752  | 0.001577 | 0.009729  | 0.000285 | 0.000047  | 0.000001 | 140.091     | 15.951372    | 1.00098985   | 5.757E-11    |
| 20F23857              | 17.0 % | ✓ | 3.794348  | 0.001595 | 0.010668  | 0.000518 | 0.000050  | 0.000002 | 140.097     | 15.953342    | 1.00098990   | 3.399E-11    |
| 20F23859              | 17.0 % | ✓ | 3.792669  | 0.001594 | 0.010665  | 0.000529 | 0.000039  | 0.000001 | 140.109     | 15.957062    | 1.00098998   | 3.415E-11    |
| 20F23860              | 17.0 % | ✓ | 3.803817  | 0.001586 | 0.010398  | 0.000417 | 0.000048  | 0.000001 | 140.115     | 15.958813    | 1.00099002   | 4.466E-11    |
| 20F23862              | 17.0 % | ✓ | 3.791165  | 0.001592 | 0.012969  | 0.000478 | 0.000028  | 0.000001 | 140.127     | 15.962754    | 1.00099011   | 3.769E-11    |
| 20F23863              | 17.0 % | ✓ | 3.799480  | 0.001594 | 0.010811  | 0.000448 | 0.000046  | 0.000001 | 140.133     | 15.964506    | 1.00099015   | 3.813E-11    |
| 20F23865              | 17.0 % | ✓ | 3.792744  | 0.001594 | 0.011427  | 0.000460 | 0.000053  | 0.000001 | 140.144     | 15.968229    | 1.00099023   | 3.732E-11    |
| 20F23866              | 17.0 % | ✓ | 3.799398  | 0.001595 | 0.012331  | 0.000490 | 0.000075  | 0.000001 | 140.151     | 15.970200    | 1.00099028   | 3.521E-11    |
| 20F23868              | 17.0 % | ✓ | 3.789168  | 0.001582 | 0.010661  | 0.000440 | 0.000031  | 0.000001 | 140.162     | 15.973925    | 1.00099036   | 4.147E-11    |
| 20F23869              | 17.0 % | ✓ | 3.797846  | 0.001606 | 0.011166  | 0.000602 | 0.000078  | 0.000002 | 140.169     | 15.975897    | 1.00099040   | 2.889E-11    |
| 20F23871              | 17.0 % | ✓ | 3.807374  | 0.001583 | 0.010338  | 0.000329 | 0.000082  | 0.000001 | 140.181     | 15.979623    | 1.00099049   | 4.774E-11    |
| 20F23872              | 17.0 % | ✓ | 3.821716  | 0.001599 | 0.010276  | 0.000419 | 0.000141  | 0.000002 | 140.186     | 15.981376    | 1.00099053   | 4.006E-11    |
| 20F23874              | 17.0 % | ✓ | 3.914876  | 0.001748 | 0.008994  | 0.001707 | 0.000420  | 0.000006 | 140.199     | 15.985322    | 1.00099061   | 1.127E-11    |
| 20F23875              | 17.0 % | ✓ | 3.799648  | 0.001595 | 0.011205  | 0.000521 | 0.000057  | 0.000002 | 140.204     | 15.987077    | 1.00099065   | 3.309E-11    |
| 20F23877              | 17.0 % | ✓ | 3.794107  | 0.001585 | 0.012457  | 0.000414 | 0.000028  | 0.000001 | 140.216     | 15.990805    | 1.00099074   | 3.996E-11    |
| 20F23878              | 17.0 % | ✓ | 3.809159  | 0.001581 | 0.011370  | 0.000291 | 0.000076  | 0.000001 | 140.222     | 15.992779    | 1.00099078   | 5.630E-11    |
| 20F23880              | 17.0 % | ✓ | 3.795799  | 0.001572 | 0.010439  | 0.000293 | 0.000034  | 0.000001 | 140.234     | 15.996509    | 1.00099086   | 6.199E-11    |
| 20F23881              | 17.0 % | ✓ | 3.806802  | 0.001577 | 0.012155  | 0.000309 | 0.000052  | 0.000001 | 140.240     | 15.998484    | 1.00099091   | 5.790E-11    |

| Procedure<br>Blanks |        | 36Ar ± 1σ (SE)<br>[fA] | 37Ar ± 1σ (SE)<br>[fA] | 38Ar ± 1σ (SE)<br>[fA] | 39Ar ± 1σ (SE)<br>[fA] | 40Ar ± 1σ (SE)<br>[fA] |
|---------------------|--------|------------------------|------------------------|------------------------|------------------------|------------------------|
| 20F23838            | 17.0 % | 0.0097682 ±0.0002100   | 0.0118539 ±0.0062157   | 0.0028835 ±0.0065829   | 0.0228777 ±0.0062635   | 2.8800734 ±0.0154705   |
| 20F23839            | 17.0 % | 0.0097682 ±0.0002100   | 0.0118539 ±0.0062157   | 0.0028835 ±0.0065829   | 0.0228777 ±0.0062635   | 2.8800734 ±0.0154705   |
| 20F23841            | 17.0 % | 0.0091081 ±0.0002118   | 0.0124661 ±0.0056267   | 0.0021175 ±0.0061117   | 0.0169947 ±0.0063801   | 2.5822923 ±0.0145498   |
| 20F23842            | 17.0 % | 0.0091081 ±0.0002118   | 0.0124661 ±0.0056267   | 0.0021175 ±0.0061117   | 0.0169947 ±0.0063801   | 2.5822923 ±0.0145498   |
| 20F23844            | 17.0 % | 0.0098492 ±0.0001938   | 0.0136896 ±0.0054201   | 0.0037189 ±0.0062091   | 0.0285802 ±0.0057627   | 2.8325583 ±0.0152377   |
| 20F23845            | 17.0 % | 0.0098492 ±0.0001938   | 0.0136896 ±0.0054201   | 0.0037189 ±0.0062091   | 0.0285802 ±0.0057627   | 2.8325583 ±0.0152377   |
| 20F23847            | 17.0 % | 0.0101792 ±0.0002315   | 0.0096326 ±0.0060641   | 0.0069297 ±0.0059244   | 0.0339563 ±0.0065349   | 2.7299084 ±0.0156565   |
| 20F23848            | 17.0 % | 0.0101792 ±0.0002315   | 0.0096326 ±0.0060641   | 0.0069297 ±0.0059244   | 0.0339563 ±0.0065349   | 2.7299084 ±0.0156565   |
| 20F23850            | 17.0 % | 0.0095503 ±0.0002015   | 0.0191755 ±0.0050800   | 0.0063207 ±0.0061530   | 0.0204852 ±0.0060358   | 2.7300362 ±0.0149319   |
| 20F23851            | 17.0 % | 0.0095503 ±0.0002015   | 0.0191755 ±0.0050800   | 0.0063207 ±0.0061530   | 0.0204852 ±0.0060358   | 2.7300362 ±0.0149319   |
| 20F23853            | 17.0 % | 0.0095153 ±0.0001809   | 0.0176994 ±0.0053300   | 0.0142902 ±0.0066322   | 0.0176536 ±0.0061921   | 2.6479196 ±0.0151455   |
| 20F23854            | 17.0 % | 0.0095153 ±0.0001809   | 0.0176994 ±0.0053300   | 0.0142902 ±0.0066322   | 0.0176536 ±0.0061921   | 2.6479196 ±0.0151455   |
| 20F23856            | 17.0 % | 0.0096826 ±0.0002129   | 0.0064094 ±0.0055051   | 0.0100809 ±0.0062956   | 0.0147859 ±0.0067669   | 2.7844193 ±0.0171487   |
| 20F23857            | 17.0 % | 0.0096826 ±0.0002129   | 0.0064094 ±0.0055051   | 0.0100809 ±0.0062956   | 0.0147859 ±0.0067669   | 2.7844193 ±0.0171487   |
| 20F23859            | 17.0 % | 0.0104756 ±0.0001964   | 0.0145798 ±0.0059536   | 0.0094567 ±0.0061279   | 0.0258600 ±0.0059342   | 2.8115001 ±0.0160306   |
| 20F23860            | 17.0 % | 0.0104756 ±0.0001964   | 0.0145798 ±0.0059536   | 0.0094567 ±0.0061279   | 0.0258600 ±0.0059342   | 2.8115001 ±0.0160306   |
| 20F23862            | 17.0 % | 0.0093615 ±0.0002025   | 0.0142351 ±0.0059241   | 0.0077267 ±0.0068047   | 0.0178800 ±0.0064924   | 2.7520340 ±0.0168734   |
| 20F23863            | 17.0 % | 0.0093615 ±0.0002025   | 0.0142351 ±0.0059241   | 0.0077267 ±0.0068047   | 0.0178800 ±0.0064924   | 2.7520340 ±0.0168734   |
| 20F23865            | 17.0 % | 0.0093274 ±0.0001940   | 0.0210136 ±0.0057631   | 0.0121897 ±0.0059389   | 0.0300676 ±0.0060912   | 2.6328064 ±0.0131392   |
| 20F23866            | 17.0 % | 0.0093274 ±0.0001940   | 0.0210136 ±0.0057631   | 0.0121897 ±0.0059389   | 0.0300676 ±0.0060912   | 2.6328064 ±0.0131392   |
| 20F23868            | 17.0 % | 0.0095059 ±0.0002215   | 0.0206399 ±0.0059679   | 0.0014774 ±0.0072988   | 0.0046339 ±0.0064302   | 2.6022774 ±0.0140365   |
| 20F23869            | 17.0 % | 0.0095059 ±0.0002215   | 0.0206399 ±0.0059679   | 0.0014774 ±0.0072988   | 0.0046339 ±0.0064302   | 2.6022774 ±0.0140365   |
| 20F23871            | 17.0 % | 0.0094059 ±0.0001871   | 0.0086405 ±0.0051128   | 0.0083312 ±0.0061715   | 0.0268890 ±0.0056512   | 2.6218878 ±0.0158483   |
| 20F23872            | 17.0 % | 0.0094059 ±0.0001871   | 0.0086405 ±0.0051128   | 0.0083312 ±0.0061715   | 0.0268890 ±0.0056512   | 2.6218878 ±0.0158483   |
| 20F23874            | 17.0 % | 0.0101100 ±0.0002237   | 0.0177083 ±0.0060112   | 0.0054347 ±0.0067030   | 0.0158394 ±0.0055603   | 2.6352158 ±0.0157220   |
| 20F23875            | 17.0 % | 0.0101100 ±0.0002237   | 0.0177083 ±0.0060112   | 0.0054347 ±0.0067030   | 0.0158394 ±0.0055603   | 2.6352158 ±0.0157220   |
| 20F23877            | 17.0 % | 0.0094059 ±0.0001871   | 0.0086405 ±0.0051128   | 0.0083312 ±0.0061715   | 0.0268890 ±0.0056512   | 2.6218878 ±0.0158483   |
| 20F23878            | 17.0 % | 0.0094059 ±0.0001871   | 0.0086405 ±0.0051128   | 0.0083312 ±0.0061715   | 0.0268890 ±0.0056512   | 2.6218878 ±0.0158483   |
| 20F23880            | 17.0 % | 0.0101100 ±0.0002237   | 0.0177083 ±0.0060112   | 0.0054347 ±0.0067030   | 0.0158394 ±0.0055603   | 2.6352158 ±0.0157220   |
| 20F23881            | 17.0 % | 0.0101100 ±0.0002237   | 0.0177083 ±0.0060112   | 0.0054347 ±0.0067030   | 0.0158394 ±0.0055603   | 2.6352158 ±0.0157220   |

| Intercept Values |        | 36Ar ± 1σ (SE)<br>[fA] | r2     | Regression<br>(type,n) | 37Ar ± 1σ (SE)<br>[fA] | r2     | Regression<br>(type,n) | 38Ar ± 1σ (SE)<br>[fA] | r2     | Regression<br>(type,n) | 39Ar ± 1σ (SE)<br>[fA] | r2     | Regression<br>(type,n) | 40Ar ± 1σ (SE)<br>[fA] | r2     | Regression<br>(type,n) |
|------------------|--------|------------------------|--------|------------------------|------------------------|--------|------------------------|------------------------|--------|------------------------|------------------------|--------|------------------------|------------------------|--------|------------------------|
| 20F23838         | 17.0 % | 0.0237189 ± 0.0003438  | 0.9845 | EXP 150 of 150         | 0.3455181 ± 0.0052063  | 0.3567 | EXP 148 of 150         | 6.2589882 ± 0.0051928  | 0.9936 | EXP 150 of 150         | 519.12454 ± 0.02979    | 1.0000 | EXP 150 of 150         | 1976.4732 ± 0.0572     | 1.0000 | EXP 148 of 150         |
| 20F23839         | 17.0 % | 0.0534140 ± 0.0004279  | 0.9710 | EXP 148 of 150         | 0.3439805 ± 0.0060232  | 0.2318 | EXP 150 of 150         | 5.9136887 ± 0.0073793  | 0.9857 | EXP 150 of 150         | 489.46429 ± 0.02529    | 1.0000 | EXP 150 of 150         | 1868.0713 ± 0.0706     | 1.0000 | EXP 150 of 150         |
| 20F23841         | 17.0 % | 0.0249871 ± 0.0003527  | 0.9760 | EXP 150 of 150         | 0.2587016 ± 0.0058197  | 0.1686 | EXP 150 of 150         | 4.5946097 ± 0.0060585  | 0.9841 | EXP 150 of 150         | 380.64286 ± 0.02529    | 1.0000 | EXP 150 of 150         | 1447.8319 ± 0.0519     | 1.0000 | EXP 150 of 150         |
| 20F23842         | 17.0 % | 0.0287427 ± 0.0003482  | 0.9593 | EXP 150 of 150         | 0.1545808 ± 0.0058462  | 0.1160 | EXP 149 of 150         | 3.2296169 ± 0.0066532  | 0.9624 | EXP 150 of 150         | 267.63624 ± 0.02038    | 0.9999 | EXP 150 of 150         | 1020.8381 ± 0.0502     | 1.0000 | EXP 150 of 150         |
| 20F23844         | 17.0 % | 0.0338704 ± 0.0004407  | 0.9805 | EXP 150 of 150         | 0.3411830 ± 0.0054951  | 0.2665 | EXP 150 of 150         | 6.9583004 ± 0.0067370  | 0.9914 | EXP 147 of 150         | 577.67433 ± 0.02914    | 1.0000 | EXP 150 of 150         | 2197.8993 ± 0.0670     | 1.0000 | EXP 150 of 150         |
| 20F23845         | 17.0 % | 0.0369950 ± 0.0004222  | 0.9865 | EXP 147 of 150         | 0.4877374 ± 0.0056913  | 0.3680 | EXP 149 of 150         | 7.9300371 ± 0.0079451  | 0.9906 | EXP 150 of 150         | 659.72838 ± 0.03286    | 1.0000 | EXP 149 of 150         | 2515.2358 ± 0.0658     | 1.0000 | EXP 150 of 150         |
| 20F23847         | 17.0 % | 0.0518219 ± 0.0004595  | 0.9712 | EXP 150 of 150         | 0.3123871 ± 0.0060484  | 0.2156 | EXP 150 of 150         | 5.9599748 ± 0.0068337  | 0.9875 | EXP 150 of 150         | 494.40694 ± 0.02552    | 1.0000 | EXP 149 of 150         | 1889.7336 ± 0.0694     | 1.0000 | EXP 149 of 150         |
| 20F23848         | 17.0 % | 0.0214738 ± 0.0003150  | 0.9662 | EXP 150 of 150         | 0.1196346 ± 0.0060753  | 0.0652 | EXP 150 of 150         | 2.6306288 ± 0.0062436  | 0.9496 | EXP 149 of 150         | 216.09019 ± 0.01888    | 0.9999 | EXP 149 of 150         | 823.0729 ± 0.0409      | 1.0000 | EXP 150 of 150         |
| 20F23850         | 17.0 % | 0.0305803 ± 0.0003251  | 0.9725 | EXP 150 of 150         | 0.2027041 ± 0.0051557  | 0.1316 | EXP 148 of 150         | 3.6420286 ± 0.0067490  | 0.9677 | EXP 150 of 150         | 302.40027 ± 0.02314    | 0.9999 | EXP 150 of 150         | 1153.7133 ± 0.0481     | 1.0000 | EXP 149 of 150         |
| 20F23851         | 17.0 % | 0.0215426 ± 0.0003167  | 0.9776 | EXP 150 of 150         | 0.1831401 ± 0.0055331  | 0.0691 | EXP 150 of 150         | 3.6431324 ± 0.0068735  | 0.9667 | EXP 150 of 150         | 302.49871 ± 0.02070    | 1.0000 | EXP 150 of 150         | 1150.7644 ± 0.0444     | 1.0000 | EXP 148 of 150         |
| 20F23853         | 17.0 % | 0.0397536 ± 0.0003498  | 0.9788 | EXP 149 of 150         | 0.2581874 ± 0.0055108  | 0.2416 | EXP 149 of 150         | 4.9073566 ± 0.0069065  | 0.9816 | EXP 150 of 150         | 408.09065 ± 0.02504    | 1.0000 | EXP 150 of 150         | 1558.5581 ± 0.0590     | 1.0000 | EXP 147 of 150         |
| 20F23854         | 17.0 % | 0.0332638 ± 0.0003390  | 0.9714 | EXP 150 of 150         | 0.1902387 ± 0.0060831  | 0.0554 | EXP 150 of 150         | 3.3689238 ± 0.0069746  | 0.9595 | EXP 150 of 150         | 280.97295 ± 0.02052    | 1.0000 | EXP 149 of 150         | 1075.4868 ± 0.0545     | 1.0000 | EXP 150 of 150         |
| 20F23856         | 17.0 % | 0.0293827 ± 0.0003217  | 0.9856 | EXP 149 of 150         | 0.2551258 ± 0.0052253  | 0.1941 | EXP 149 of 150         | 5.1448862 ± 0.0061218  | 0.9870 | EXP 150 of 150         | 428.07902 ± 0.02550    | 1.0000 | EXP 150 of 150         | 1629.0146 ± 0.0635     | 1.0000 | EXP 150 of 150         |
| 20F23857         | 17.0 % | 0.0222122 ± 0.0003187  | 0.9732 | EXP 150 of 150         | 0.1630316 ± 0.0060660  | 0.0595 | EXP 150 of 150         | 3.0384020 ± 0.0071088  | 0.9486 | EXP 150 of 150         | 252.94701 ± 0.01953    | 0.9999 | EXP 149 of 150         | 963.0739 ± 0.0505      | 1.0000 | EXP 150 of 150         |
| 20F23859         | 17.0 % | 0.0202032 ± 0.0003147  | 0.9723 | EXP 148 of 150         | 0.1556072 ± 0.0059373  | 0.0628 | EXP 150 of 150         | 3.0533179 ± 0.0070925  | 0.9498 | EXP 150 of 150         | 254.21998 ± 0.02151    | 0.9999 | EXP 150 of 150         | 967.4648 ± 0.0400      | 1.0000 | EXP 150 of 150         |
| 20F23860         | 17.0 % | 0.0261681 ± 0.0003175  | 0.9793 | EXP 150 of 150         | 0.2017461 ± 0.0062568  | 0.1163 | EXP 149 of 150         | 3.9979692 ± 0.0066819  | 0.9751 | EXP 147 of 150         | 331.46594 ± 0.02234    | 1.0000 | EXP 150 of 150         | 1264.3066 ± 0.0526     | 1.0000 | EXP 149 of 150         |
| 20F23862         | 17.0 % | 0.0171516 ± 0.0002986  | 0.9778 | EXP 150 of 150         | 0.2141710 ± 0.0059108  | 0.1407 | EXP 150 of 150         | 3.3658943 ± 0.0071648  | 0.9581 | EXP 150 of 150         | 280.65203 ± 0.02144    | 0.9999 | EXP 150 of 150         | 1067.3218 ± 0.0556     | 1.0000 | EXP 149 of 150         |
| 20F23863         | 17.0 % | 0.0222464 ± 0.0003045  | 0.9775 | EXP 149 of 150         | 0.1779532 ± 0.0052572  | 0.0924 | EXP 150 of 150         | 3.4232448 ± 0.0068010  | 0.9640 | EXP 150 of 150         | 283.32714 ± 0.02207    | 0.9999 | EXP 150 of 150         | 1079.8268 ± 0.0489     | 1.0000 | EXP 149 of 150         |
| 20F23865         | 17.0 % | 0.0237703 ± 0.0003008  | 0.9748 | EXP 149 of 150         | 0.1781093 ± 0.0055081  | 0.0751 | EXP 150 of 150         | 3.3636391 ± 0.0068286  | 0.9619 | EXP 150 of 150         | 277.79500 ± 0.02264    | 0.9999 | EXP 150 of 150         | 1056.7575 ± 0.0505     | 1.0000 | EXP 150 of 150         |
| 20F23866         | 17.0 % | 0.0286185 ± 0.0003298  | 0.9667 | EXP 150 of 150         | 0.1813600 ± 0.0055549  | 0.1086 | EXP 150 of 150         | 3.1377963 ± 0.0068296  | 0.9575 | EXP 148 of 150         | 261.67352 ± 0.02053    | 0.9999 | EXP 150 of 150         | 997.3181 ± 0.0481      | 1.0000 | EXP 148 of 150         |
| 20F23868         | 17.0 % | 0.0189978 ± 0.0003276  | 0.9758 | EXP 150 of 150         | 0.1859581 ± 0.0060394  | 0.1321 | EXP 150 of 150         | 3.7117901 ± 0.0062900  | 0.9731 | EXP 149 of 150         | 309.01450 ± 0.02189    | 1.0000 | EXP 150 of 150         | 1174.1965 ± 0.0481     | 1.0000 | EXP 150 of 150         |
| 20F23869         | 17.0 % | 0.0260645 ± 0.0003278  | 0.9617 | EXP 150 of 150         | 0.1297049 ± 0.0054549  | 0.0717 | EXP 149 of 150         | 2.5810039 ± 0.0064185  | 0.9420 | EXP 149 of 150         | 214.73684 ± 0.01924    | 0.9999 | EXP 150 of 150         | 818.6125 ± 0.0420      | 1.0000 | EXP 148 of 150         |
| 20F23871         | 17.0 % | 0.0379403 ± 0.0003654  | 0.9695 | EXP 150 of 150         | 0.2207983 ± 0.0051306  | 0.1154 | EXP 149 of 150         | 4.2713767 ± 0.0073864  | 0.9728 | EXP 150 of 150         | 354.05512 ± 0.02229    | 1.0000 | EXP 148 of 150         | 1351.3504 ± 0.0513     | 1.0000 | EXP 150 of 150         |
| 20F23872         | 17.0 % | 0.0505959 ± 0.0004019  | 0.9512 | EXP 148 of 150         | 0.1819970 ± 0.0058040  | 0.0903 | EXP 149 of 150         | 3.5686401 ± 0.0068021  | 0.9656 | EXP 150 of 150         | 295.97171 ± 0.02273    | 0.9999 | EXP 150 of 150         | 1134.3192 ± 0.0449     | 1.0000 | EXP 150 of 150         |
| 20F23874         | 17.0 % | 0.0437014 ± 0.0003778  | 0.7656 | EXP 150 of 150         | 0.0281009 ± 0.0062761  | 0.0022 | EXP 150 of 150         | 0.9795088 ± 0.0070113  | 0.6847 | EXP 149 of 150         | 81.29435 ± 0.01063     | 0.9998 | EXP 150 of 150         | 321.0219 ± 0.0286      | 0.9999 | EXP 147 of 150         |
| 20F23875         | 17.0 % | 0.0238274 ± 0.0003084  | 0.9687 | EXP 150 of 150         | 0.1549283 ± 0.0052773  | 0.0797 | EXP 150 of 150         | 2.9667863 ± 0.0062200  | 0.9599 | EXP 149 of 150         | 245.89820 ± 0.01908    | 0.9999 | EXP 150 of 150         | 937.4636 ± 0.0453      | 1.0000 | EXP 150 of 150         |
| 20F23877         | 17.0 % | 0.0176945 ± 0.0002540  | 0.9848 | EXP 149 of 150         | 0.2234196 ± 0.0056872  | 0.1484 | EXP 146 of 150         | 3.5820048 ± 0.0064859  | 0.9698 | EXP 150 of 150         | 297.39321 ± 0.02161    | 1.0000 | EXP 150 of 150         | 1131.5401 ± 0.0448     | 1.0000 | EXP 149 of 150         |
| 20F23878         | 17.0 % | 0.0407021 ± 0.0003880  | 0.9753 | EXP 150 of 150         | 0.2885151 ± 0.0054991  | 0.2480 | EXP 149 of 150         | 5.0074858 ± 0.0068174  | 0.9832 | EXP 150 of 150         | 417.27038 ± 0.02609    | 1.0000 | EXP 149 of 150         | 1592.9251 ± 0.0528     | 1.0000 | EXP 150 of 150         |
| 20F23880         | 17.0 % | 0.0256842 ± 0.0003459  | 0.9853 | EXP 148 of 150         | 0.2837235 ± 0.0058313  | 0.1848 | EXP 149 of 150         | 5.5628100 ± 0.0071156  | 0.9846 | EXP 150 of 150         | 461.09670 ± 0.02608    | 1.0000 | EXP 149 of 150         | 1753.8587 ± 0.0584     | 1.0000 | EXP 150 of 150         |
| 20F23881         | 17.0 % | 0.0322473 ± 0.0003642  | 0.9820 | EXP 149 of 150         | 0.3090824 ± 0.0055746  | 0.2959 | EXP 148 of 150         | 5.1592512 ± 0.0069404  | 0.9836 | EXP 149 of 150         | 429.37386 ± 0.02506    | 1.0000 | EXP 150 of 150         | 1638.0997 ± 0.0519     | 1.0000 | EXP 149 of 150         |

| Project Info |        | Analyst     | Irradiation | X-pos | Y-pos | Z/H-pos | Project                | Experiment | Nmb |
|--------------|--------|-------------|-------------|-------|-------|---------|------------------------|------------|-----|
| 20F23838     | 17.0 % | Dan Miggins | 20-OSU-01   | 0.00  | 0.00  | 49.46   | Oregon\Swenton (20-01) | 20F23834   | 01  |
| 20F23839     | 17.0 % | Dan Miggins | 20-OSU-01   | 0.00  | 0.00  | 49.46   | Oregon\Swenton (20-01) | 20F23834   | 01  |
| 20F23841     | 17.0 % | Dan Miggins | 20-OSU-01   | 0.00  | 0.00  | 49.46   | Oregon\Swenton (20-01) | 20F23834   | 01  |
| 20F23842     | 17.0 % | Dan Miggins | 20-OSU-01   | 0.00  | 0.00  | 49.46   | Oregon\Swenton (20-01) | 20F23834   | 01  |
| 20F23844     | 17.0 % | Dan Miggins | 20-OSU-01   | 0.00  | 0.00  | 49.46   | Oregon\Swenton (20-01) | 20F23834   | 01  |
| 20F23845     | 17.0 % | Dan Miggins | 20-OSU-01   | 0.00  | 0.00  | 49.46   | Oregon\Swenton (20-01) | 20F23834   | 01  |
| 20F23847     | 17.0 % | Dan Miggins | 20-OSU-01   | 0.00  | 0.00  | 49.46   | Oregon\Swenton (20-01) | 20F23834   | 01  |
| 20F23848     | 17.0 % | Dan Miggins | 20-OSU-01   | 0.00  | 0.00  | 49.46   | Oregon\Swenton (20-01) | 20F23834   | 01  |
| 20F23850     | 17.0 % | Dan Miggins | 20-OSU-01   | 0.00  | 0.00  | 49.46   | Oregon\Swenton (20-01) | 20F23834   | 01  |
| 20F23851     | 17.0 % | Dan Miggins | 20-OSU-01   | 0.00  | 0.00  | 49.46   | Oregon\Swenton (20-01) | 20F23834   | 01  |
| 20F23853     | 17.0 % | Dan Miggins | 20-OSU-01   | 0.00  | 0.00  | 49.46   | Oregon\Swenton (20-01) | 20F23834   | 01  |
| 20F23854     | 17.0 % | Dan Miggins | 20-OSU-01   | 0.00  | 0.00  | 49.46   | Oregon\Swenton (20-01) | 20F23834   | 01  |
| 20F23856     | 17.0 % | Dan Miggins | 20-OSU-01   | 0.00  | 0.00  | 49.46   | Oregon\Swenton (20-01) | 20F23834   | 01  |
| 20F23857     | 17.0 % | Dan Miggins | 20-OSU-01   | 0.00  | 0.00  | 49.46   | Oregon\Swenton (20-01) | 20F23834   | 01  |
| 20F23859     | 17.0 % | Dan Miggins | 20-OSU-01   | 0.00  | 0.00  | 49.46   | Oregon\Swenton (20-01) | 20F23834   | 01  |
| 20F23860     | 17.0 % | Dan Miggins | 20-OSU-01   | 0.00  | 0.00  | 49.46   | Oregon\Swenton (20-01) | 20F23834   | 01  |
| 20F23862     | 17.0 % | Dan Miggins | 20-OSU-01   | 0.00  | 0.00  | 49.46   | Oregon\Swenton (20-01) | 20F23834   | 01  |
| 20F23863     | 17.0 % | Dan Miggins | 20-OSU-01   | 0.00  | 0.00  | 49.46   | Oregon\Swenton (20-01) | 20F23834   | 01  |
| 20F23865     | 17.0 % | Dan Miggins | 20-OSU-01   | 0.00  | 0.00  | 49.46   | Oregon\Swenton (20-01) | 20F23834   | 01  |
| 20F23866     | 17.0 % | Dan Miggins | 20-OSU-01   | 0.00  | 0.00  | 49.46   | Oregon\Swenton (20-01) | 20F23834   | 01  |
| 20F23868     | 17.0 % | Dan Miggins | 20-OSU-01   | 0.00  | 0.00  | 49.46   | Oregon\Swenton (20-01) | 20F23834   | 01  |
| 20F23869     | 17.0 % | Dan Miggins | 20-OSU-01   | 0.00  | 0.00  | 49.46   | Oregon\Swenton (20-01) | 20F23834   | 01  |
| 20F23871     | 17.0 % | Dan Miggins | 20-OSU-01   | 0.00  | 0.00  | 49.46   | Oregon\Swenton (20-01) | 20F23834   | 01  |
| 20F23872     | 17.0 % | Dan Miggins | 20-OSU-01   | 0.00  | 0.00  | 49.46   | Oregon\Swenton (20-01) | 20F23834   | 01  |
| 20F23874     | 17.0 % | Dan Miggins | 20-OSU-01   | 0.00  | 0.00  | 49.46   | Oregon\Swenton (20-01) | 20F23834   | 01  |
| 20F23875     | 17.0 % | Dan Miggins | 20-OSU-01   | 0.00  | 0.00  | 49.46   | Oregon\Swenton (20-01) | 20F23834   | 01  |
| 20F23877     | 17.0 % | Dan Miggins | 20-OSU-01   | 0.00  | 0.00  | 49.46   | Oregon\Swenton (20-01) | 20F23834   | 01  |
| 20F23878     | 17.0 % | Dan Miggins | 20-OSU-01   | 0.00  | 0.00  | 49.46   | Oregon\Swenton (20-01) | 20F23834   | 01  |
| 20F23880     | 17.0 % | Dan Miggins | 20-OSU-01   | 0.00  | 0.00  | 49.46   | Oregon\Swenton (20-01) | 20F23834   | 01  |
| 20F23881     | 17.0 % | Dan Miggins | 20-OSU-01   | 0.00  | 0.00  | 49.46   | Oregon\Swenton (20-01) | 20F23834   | 01  |

OSU Argon Geochronology Lab

CEOAS Oregon State University, Corvallis, USA

| Sample Parameters |        | Sample   | Material | Location      | Standard Name    | Standard (in Ma) | %1σ   | Standard Reference  | Standard 40Ar/39Ar | %1σ   | J          | %1σ   | Air 40Ar/36Ar | %1σ   | MDF (lin) | %1σ   | Volume Ratio | Sensitivity (mol/volt) | Day | Month | Year | Hour | Min | Resist |
|-------------------|--------|----------|----------|---------------|------------------|------------------|-------|---------------------|--------------------|-------|------------|-------|---------------|-------|-----------|-------|--------------|------------------------|-----|-------|------|------|-----|--------|
| 20F23838          | 17.0 % | VS19-101 | Sanidine | Rhyolite Dome | FCT-NM (1C40-20) | 28.201           | 0.082 | Kuiper et al (2008) | 9.67461            | 0.154 | 0.00160477 | 0.154 | 298.096       | 0.126 | 1.0003896 | 0.041 | 1            | 3.54E-14               | 3   | SEP   | 2020 | 14   | 8   | 1      |
| 20F23839          | 17.0 % | VS19-101 | Sanidine | Rhyolite Dome | FCT-NM (1C40-20) | 28.201           | 0.082 | Kuiper et al (2008) | 9.67461            | 0.154 | 0.00160477 | 0.154 | 298.096       | 0.126 | 1.0003896 | 0.041 | 1            | 3.54E-14               | 3   | SEP   | 2020 | 14   | 16  | 1      |
| 20F23841          | 17.0 % | VS19-101 | Sanidine | Rhyolite Dome | FCT-NM (1C40-20) | 28.201           | 0.082 | Kuiper et al (2008) | 9.67461            | 0.154 | 0.00160477 | 0.154 | 298.096       | 0.126 | 1.0003896 | 0.041 | 1            | 3.54E-14               | 3   | SEP   | 2020 | 14   | 33  | 1      |
| 20F23842          | 17.0 % | VS19-101 | Sanidine | Rhyolite Dome | FCT-NM (1C40-20) | 28.201           | 0.082 | Kuiper et al (2008) | 9.67461            | 0.154 | 0.00160477 | 0.154 | 298.096       | 0.126 | 1.0003896 | 0.041 | 1            | 3.54E-14               | 3   | SEP   | 2020 | 14   | 42  | 1      |
| 20F23844          | 17.0 % | VS19-101 | Sanidine | Rhyolite Dome | FCT-NM (1C40-20) | 28.201           | 0.082 | Kuiper et al (2008) | 9.67461            | 0.154 | 0.00160477 | 0.154 | 298.096       | 0.126 | 1.0003896 | 0.041 | 1            | 3.54E-14               | 3   | SEP   | 2020 | 14   | 59  | 1      |
| 20F23845          | 17.0 % | VS19-101 | Sanidine | Rhyolite Dome | FCT-NM (1C40-20) | 28.201           | 0.082 | Kuiper et al (2008) | 9.67461            | 0.154 | 0.00160477 | 0.154 | 298.096       | 0.126 | 1.0003896 | 0.041 | 1            | 3.54E-14               | 3   | SEP   | 2020 | 15   | 8   | 1      |
| 20F23847          | 17.0 % | VS19-101 | Sanidine | Rhyolite Dome | FCT-NM (1C40-20) | 28.201           | 0.082 | Kuiper et al (2008) | 9.67461            | 0.154 | 0.00160477 | 0.154 | 298.096       | 0.126 | 1.0003896 | 0.041 | 1            | 3.54E-14               | 3   | SEP   | 2020 | 15   | 25  | 1      |
| 20F23848          | 17.0 % | VS19-101 | Sanidine | Rhyolite Dome | FCT-NM (1C40-20) | 28.201           | 0.082 | Kuiper et al (2008) | 9.67461            | 0.154 | 0.00160477 | 0.154 | 298.096       | 0.126 | 1.0003896 | 0.041 | 1            | 3.54E-14               | 3   | SEP   | 2020 | 15   | 33  | 1      |
| 20F23850          | 17.0 % | VS19-101 | Sanidine | Rhyolite Dome | FCT-NM (1C40-20) | 28.201           | 0.082 | Kuiper et al (2008) | 9.67461            | 0.154 | 0.00160477 | 0.154 | 298.096       | 0.126 | 1.0003896 | 0.041 | 1            | 3.54E-14               | 3   | SEP   | 2020 | 15   | 51  | 1      |
| 20F23851          | 17.0 % | VS19-101 | Sanidine | Rhyolite Dome | FCT-NM (1C40-20) | 28.201           | 0.082 | Kuiper et al (2008) | 9.67461            | 0.154 | 0.00160477 | 0.154 | 298.096       | 0.126 | 1.0003896 | 0.041 | 1            | 3.54E-14               | 3   | SEP   | 2020 | 15   | 59  | 1      |
| 20F23853          | 17.0 % | VS19-101 | Sanidine | Rhyolite Dome | FCT-NM (1C40-20) | 28.201           | 0.082 | Kuiper et al (2008) | 9.67461            | 0.154 | 0.00160477 | 0.154 | 298.096       | 0.126 | 1.0003896 | 0.041 | 1            | 3.54E-14               | 3   | SEP   | 2020 | 16   | 16  | 1      |
| 20F23854          | 17.0 % | VS19-101 | Sanidine | Rhyolite Dome | FCT-NM (1C40-20) | 28.201           | 0.082 | Kuiper et al (2008) | 9.67461            | 0.154 | 0.00160477 | 0.154 | 298.096       | 0.126 | 1.0003896 | 0.041 | 1            | 3.54E-14               | 3   | SEP   | 2020 | 16   | 25  | 1      |
| 20F23856          | 17.0 % | VS19-101 | Sanidine | Rhyolite Dome | FCT-NM (1C40-20) | 28.201           | 0.082 | Kuiper et al (2008) | 9.67461            | 0.154 | 0.00160477 | 0.154 | 298.096       | 0.126 | 1.0003896 | 0.041 | 1            | 3.54E-14               | 3   | SEP   | 2020 | 16   | 42  | 1      |
| 20F23857          | 17.0 % | VS19-101 | Sanidine | Rhyolite Dome | FCT-NM (1C40-20) | 28.201           | 0.082 | Kuiper et al (2008) | 9.67461            | 0.154 | 0.00160477 | 0.154 | 298.096       | 0.126 | 1.0003896 | 0.041 | 1            | 3.54E-14               | 3   | SEP   | 2020 | 16   | 51  | 1      |
| 20F23859          | 17.0 % | VS19-101 | Sanidine | Rhyolite Dome | FCT-NM (1C40-20) | 28.201           | 0.082 | Kuiper et al (2008) | 9.67461            | 0.154 | 0.00160477 | 0.154 | 298.096       | 0.126 | 1.0003896 | 0.041 | 1            | 3.54E-14               | 3   | SEP   | 2020 | 17   | 8   | 1      |
| 20F23860          | 17.0 % | VS19-101 | Sanidine | Rhyolite Dome | FCT-NM (1C40-20) | 28.201           | 0.082 | Kuiper et al (2008) | 9.67461            | 0.154 | 0.00160477 | 0.154 | 298.096       | 0.126 | 1.0003896 | 0.041 | 1            | 3.54E-14               | 3   | SEP   | 2020 | 17   | 16  | 1      |
| 20F23862          | 17.0 % | VS19-101 | Sanidine | Rhyolite Dome | FCT-NM (1C40-20) | 28.201           | 0.082 | Kuiper et al (2008) | 9.67461            | 0.154 | 0.00160477 | 0.154 | 298.096       | 0.126 | 1.0003896 | 0.041 | 1            | 3.54E-14               | 3   | SEP   | 2020 | 17   | 34  | 1      |
| 20F23863          | 17.0 % | VS19-101 | Sanidine | Rhyolite Dome | FCT-NM (1C40-20) | 28.201           | 0.082 | Kuiper et al (2008) | 9.67461            | 0.154 | 0.00160477 | 0.154 | 298.096       | 0.126 | 1.0003896 | 0.041 | 1            | 3.54E-14               | 3   | SEP   | 2020 | 17   | 42  | 1      |
| 20F23865          | 17.0 % | VS19-101 | Sanidine | Rhyolite Dome | FCT-NM (1C40-20) | 28.201           | 0.082 | Kuiper et al (2008) | 9.67461            | 0.154 | 0.00160477 | 0.154 | 298.096       | 0.126 | 1.0003896 | 0.041 | 1            | 3.54E-14               | 3   | SEP   | 2020 | 17   | 59  | 1      |
| 20F23866          | 17.0 % | VS19-101 | Sanidine | Rhyolite Dome | FCT-NM (1C40-20) | 28.201           | 0.082 | Kuiper et al (2008) | 9.67461            | 0.154 | 0.00160477 | 0.154 | 298.096       | 0.126 | 1.0003896 | 0.041 | 1            | 3.54E-14               | 3   | SEP   | 2020 | 18   | 8   | 1      |
| 20F23868          | 17.0 % | VS19-101 | Sanidine | Rhyolite Dome | FCT-NM (1C40-20) | 28.201           | 0.082 | Kuiper et al (2008) | 9.67461            | 0.154 | 0.00160477 | 0.154 | 298.096       | 0.126 | 1.0003896 | 0.041 | 1            | 3.54E-14               | 3   | SEP   | 2020 | 18   | 25  | 1      |
| 20F23869          | 17.0 % | VS19-101 | Sanidine | Rhyolite Dome | FCT-NM (1C40-20) | 28.201           | 0.082 | Kuiper et al (2008) | 9.67461            | 0.154 | 0.00160477 | 0.154 | 298.096       | 0.126 | 1.0003896 | 0.041 | 1            | 3.54E-14               | 3   | SEP   | 2020 | 18   | 34  | 1      |
| 20F23871          | 17.0 % | VS19-101 | Sanidine | Rhyolite Dome | FCT-NM (1C40-20) | 28.201           | 0.082 | Kuiper et al (2008) | 9.67461            | 0.154 | 0.00160477 | 0.154 | 298.096       | 0.126 | 1.0003896 | 0.041 | 1            | 3.54E-14               | 3   | SEP   | 2020 | 18   | 51  | 1      |
| 20F23872          | 17.0 % | VS19-101 | Sanidine | Rhyolite Dome | FCT-NM (1C40-20) | 28.201           | 0.082 | Kuiper et al (2008) | 9.67461            | 0.154 | 0.00160477 | 0.154 | 298.096       | 0.126 | 1.0003896 | 0.041 | 1            | 3.54E-14               | 3   | SEP   | 2020 | 18   | 59  | 1      |
| 20F23874          | 17.0 % | VS19-101 | Sanidine | Rhyolite Dome | FCT-NM (1C40-20) | 28.201           | 0.082 | Kuiper et al (2008) | 9.67461            | 0.154 | 0.00160477 | 0.154 | 298.096       | 0.126 | 1.0003896 | 0.041 | 1            | 3.54E-14               | 3   | SEP   | 2020 | 19   | 17  | 1      |
| 20F23875          | 17.0 % | VS19-101 | Sanidine | Rhyolite Dome | FCT-NM (1C40-20) | 28.201           | 0.082 | Kuiper et al (2008) | 9.67461            | 0.154 | 0.00160477 | 0.154 | 298.096       | 0.126 | 1.0003896 | 0.041 | 1            | 3.54E-14               | 3   | SEP   | 2020 | 19   | 25  | 1      |
| 20F23877          | 17.0 % | VS19-101 | Sanidine | Rhyolite Dome | FCT-NM (1C40-20) | 28.201           | 0.082 | Kuiper et al (2008) | 9.67461            | 0.154 | 0.00160477 | 0.154 | 298.096       | 0.126 | 1.0003896 | 0.041 | 1            | 3.54E-14               | 3   | SEP   | 2020 | 19   | 42  | 1      |
| 20F23878          | 17.0 % | VS19-101 | Sanidine | Rhyolite Dome | FCT-NM (1C40-20) | 28.201           | 0.082 | Kuiper et al (2008) | 9.67461            | 0.154 | 0.00160477 | 0.154 | 298.096       | 0.126 | 1.0003896 | 0.041 | 1            | 3.54E-14               | 3   | SEP   | 2020 | 19   | 51  | 1      |
| 20F23880          | 17.0 % | VS19-101 | Sanidine | Rhyolite Dome | FCT-NM (1C40-20) | 28.201           | 0.082 | Kuiper et al (2008) | 9.67461            | 0.154 | 0.00160477 | 0.154 | 298.096       | 0.126 | 1.0003896 | 0.041 | 1            | 3.54E-14               | 3   | SEP   | 2020 | 20   | 8   | 1      |
| 20F23881          | 17.0 % | VS19-101 | Sanidine | Rhyolite Dome | FCT-NM (1C40-20) | 28.201           | 0.082 | Kuiper et al (2008) | 9.67461            | 0.154 | 0.00160477 | 0.154 | 298.096       | 0.126 | 1.0003896 | 0.041 | 1            | 3.54E-14               | 3   | SEP   | 2020 | 20   | 17  | 1      |



20F23834.AGE >>> VS19-101 >>> OREGON

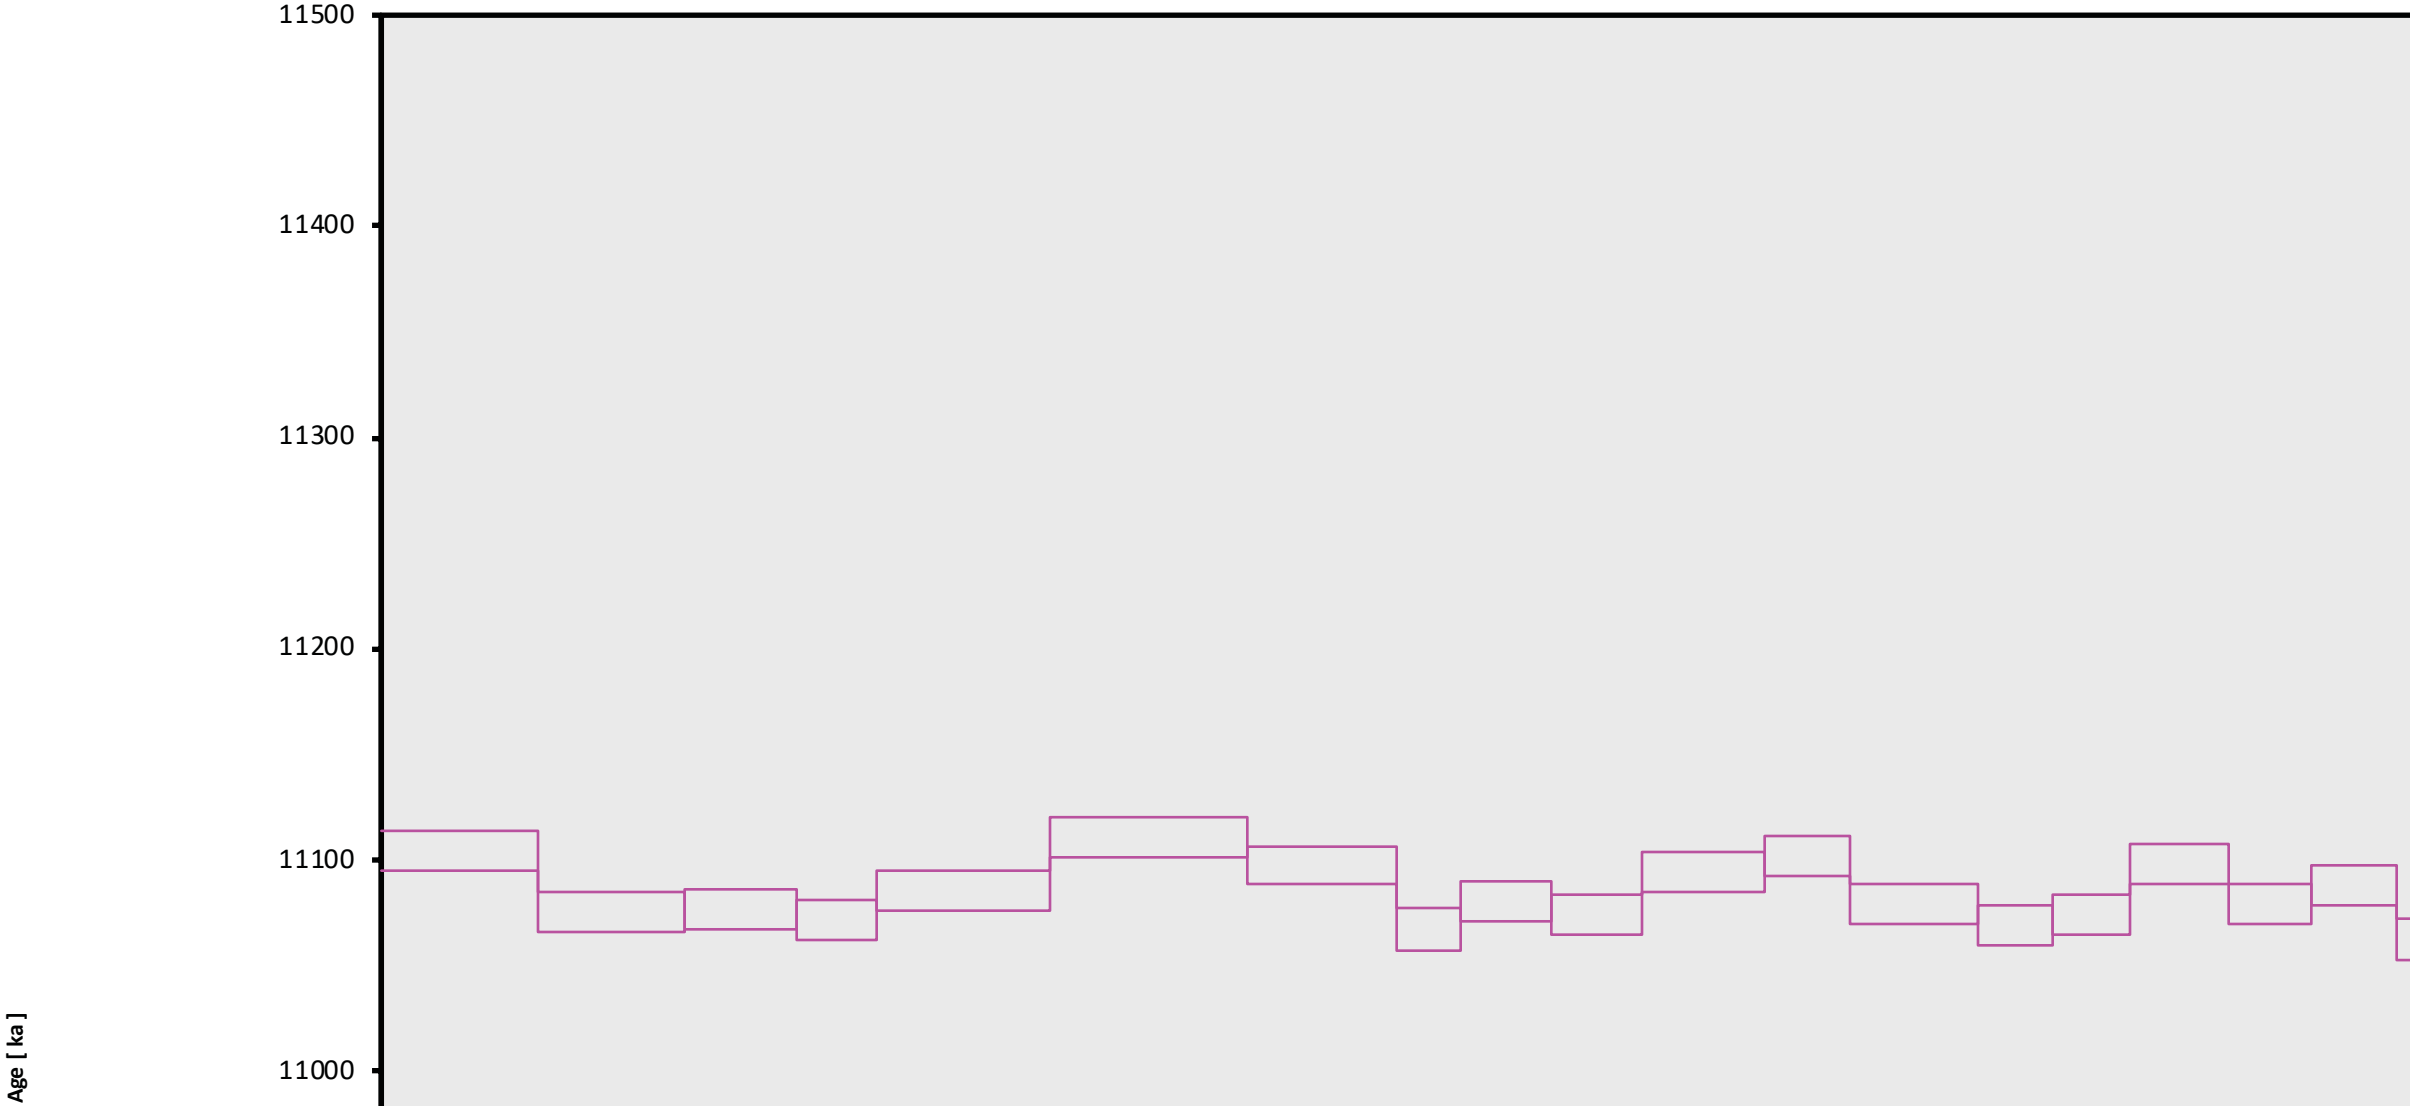

20F23834.AGE >>> VS19-101 >>> OREGON | SWENTON (20-01) PROJECT

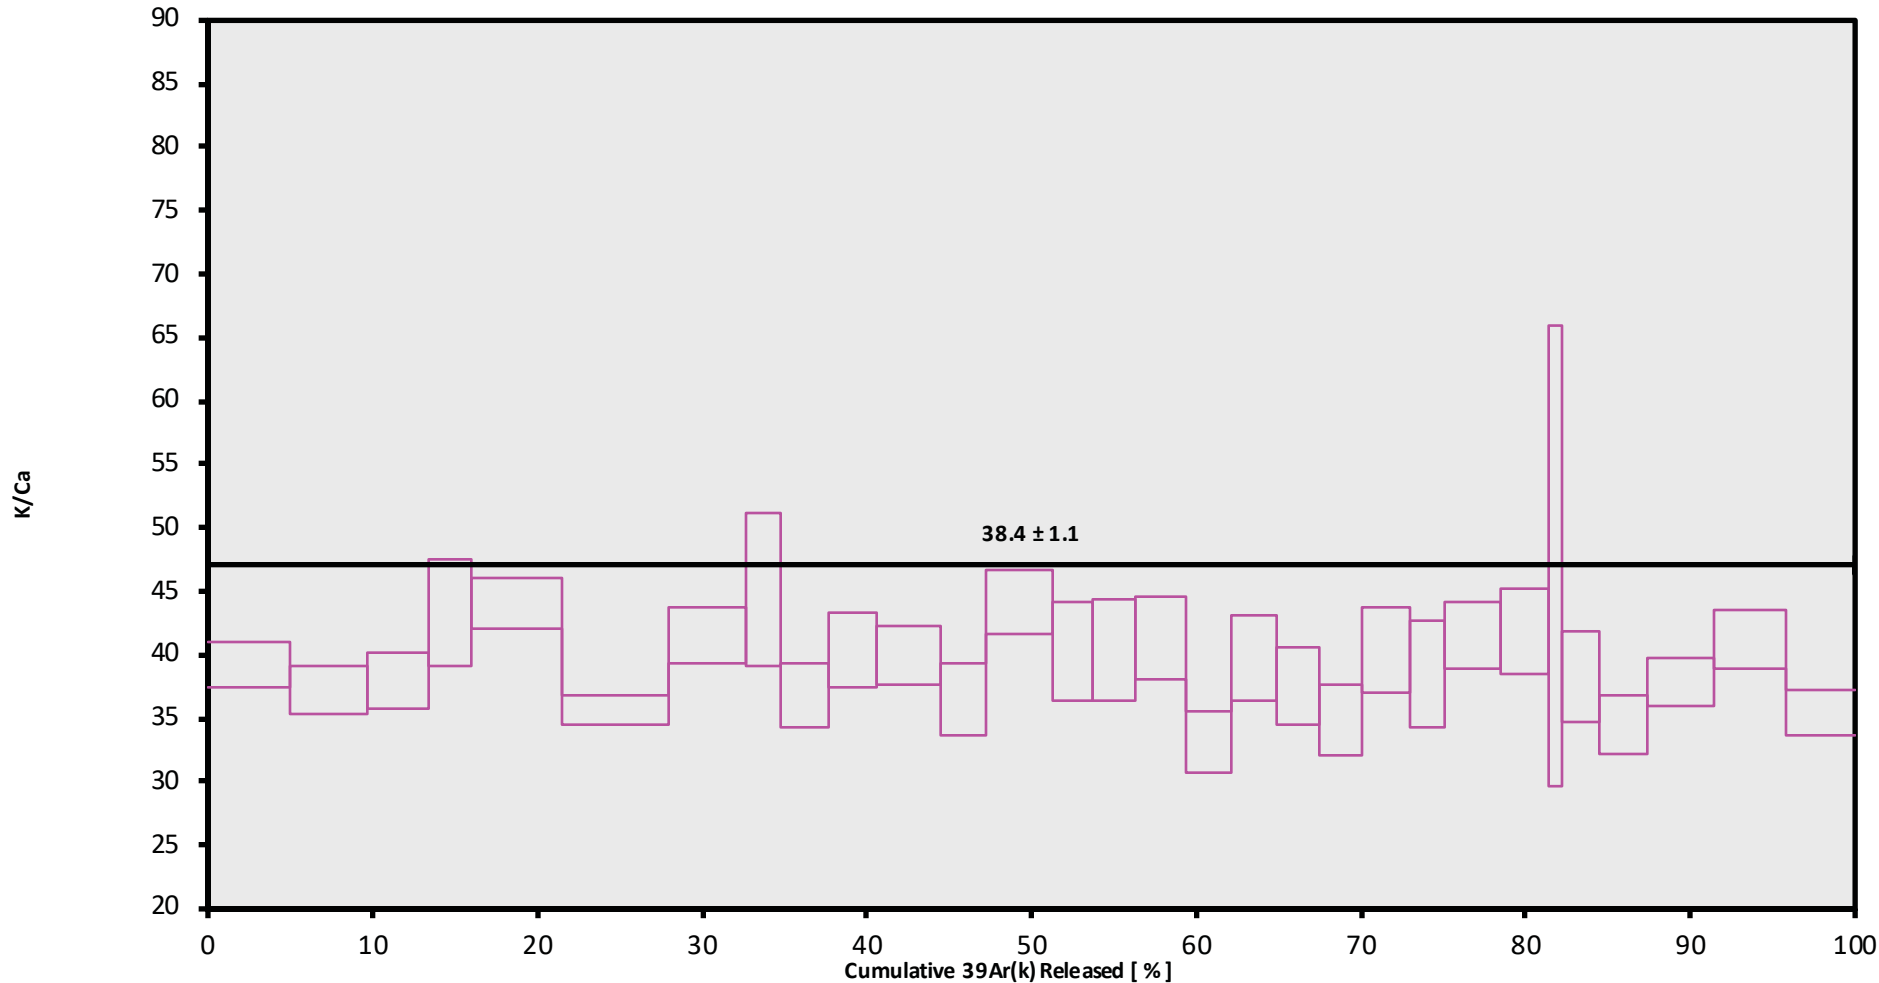

Ar-Ages in ka

WEIGHTED PLATEAU  
11082.7 ± 34.4  
TOTAL FUSION  
11085.1 ± 34.1  
NORMAL ISOCHRON  
11089.6 ± 35.1  
INVERSE ISOCHRON  
11081.8 ± 35.0

Sample Info

Sanidine  
Rhyolite Dome  
Dan Miggins



20F23834.AGE >>> VS19-101 >>> OREGON | SWENTON (20-01) PROJECT

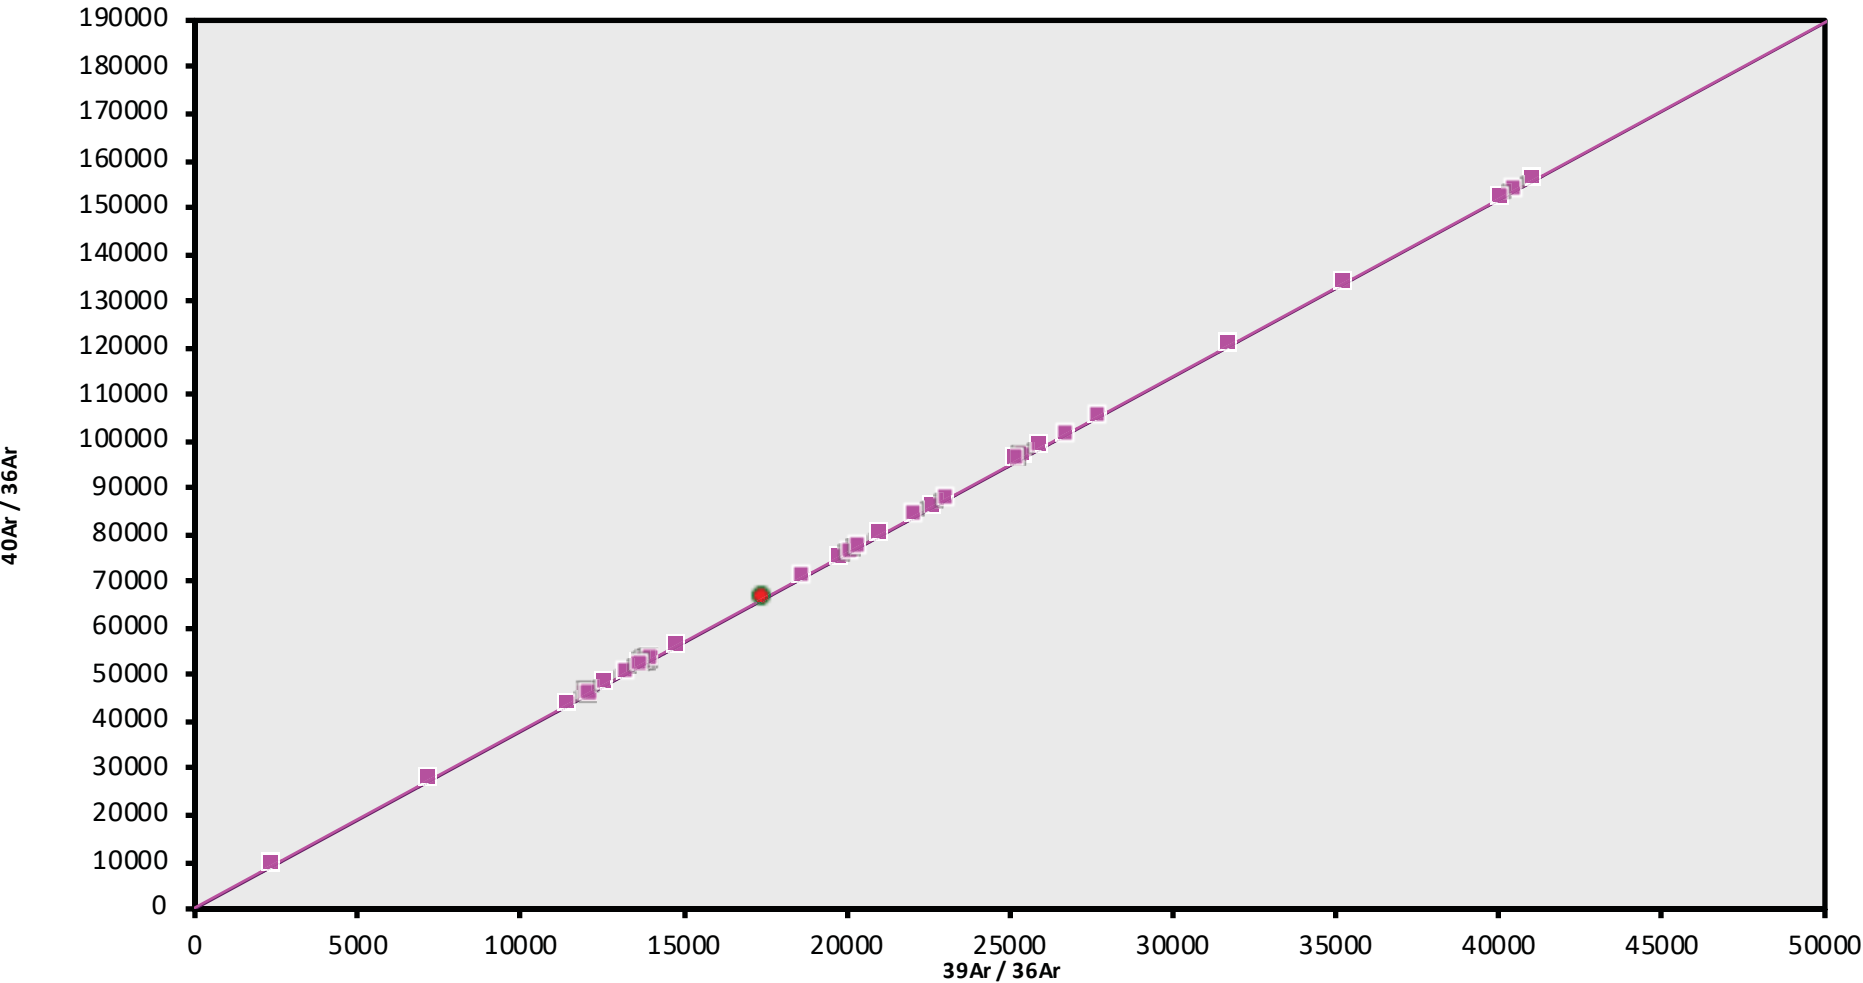

Ar-Ages in ka

WEIGHTED PLATEAU

$11082.7 \pm 34.4$

TOTAL FUSION

$11085.1 \pm 34.1$

NORMAL ISOCHRON

$11089.6 \pm 35.1$

INVERSE ISOCHRON

$11081.8 \pm 35.0$

MSWD (PROBABILITY)

Sample Info

Sanidine

Rhyolite Dome

Dan Miggins

20F23834.AGE >>> VS19-101 >>> OREGON | SWENTON (20-01) PROJECT

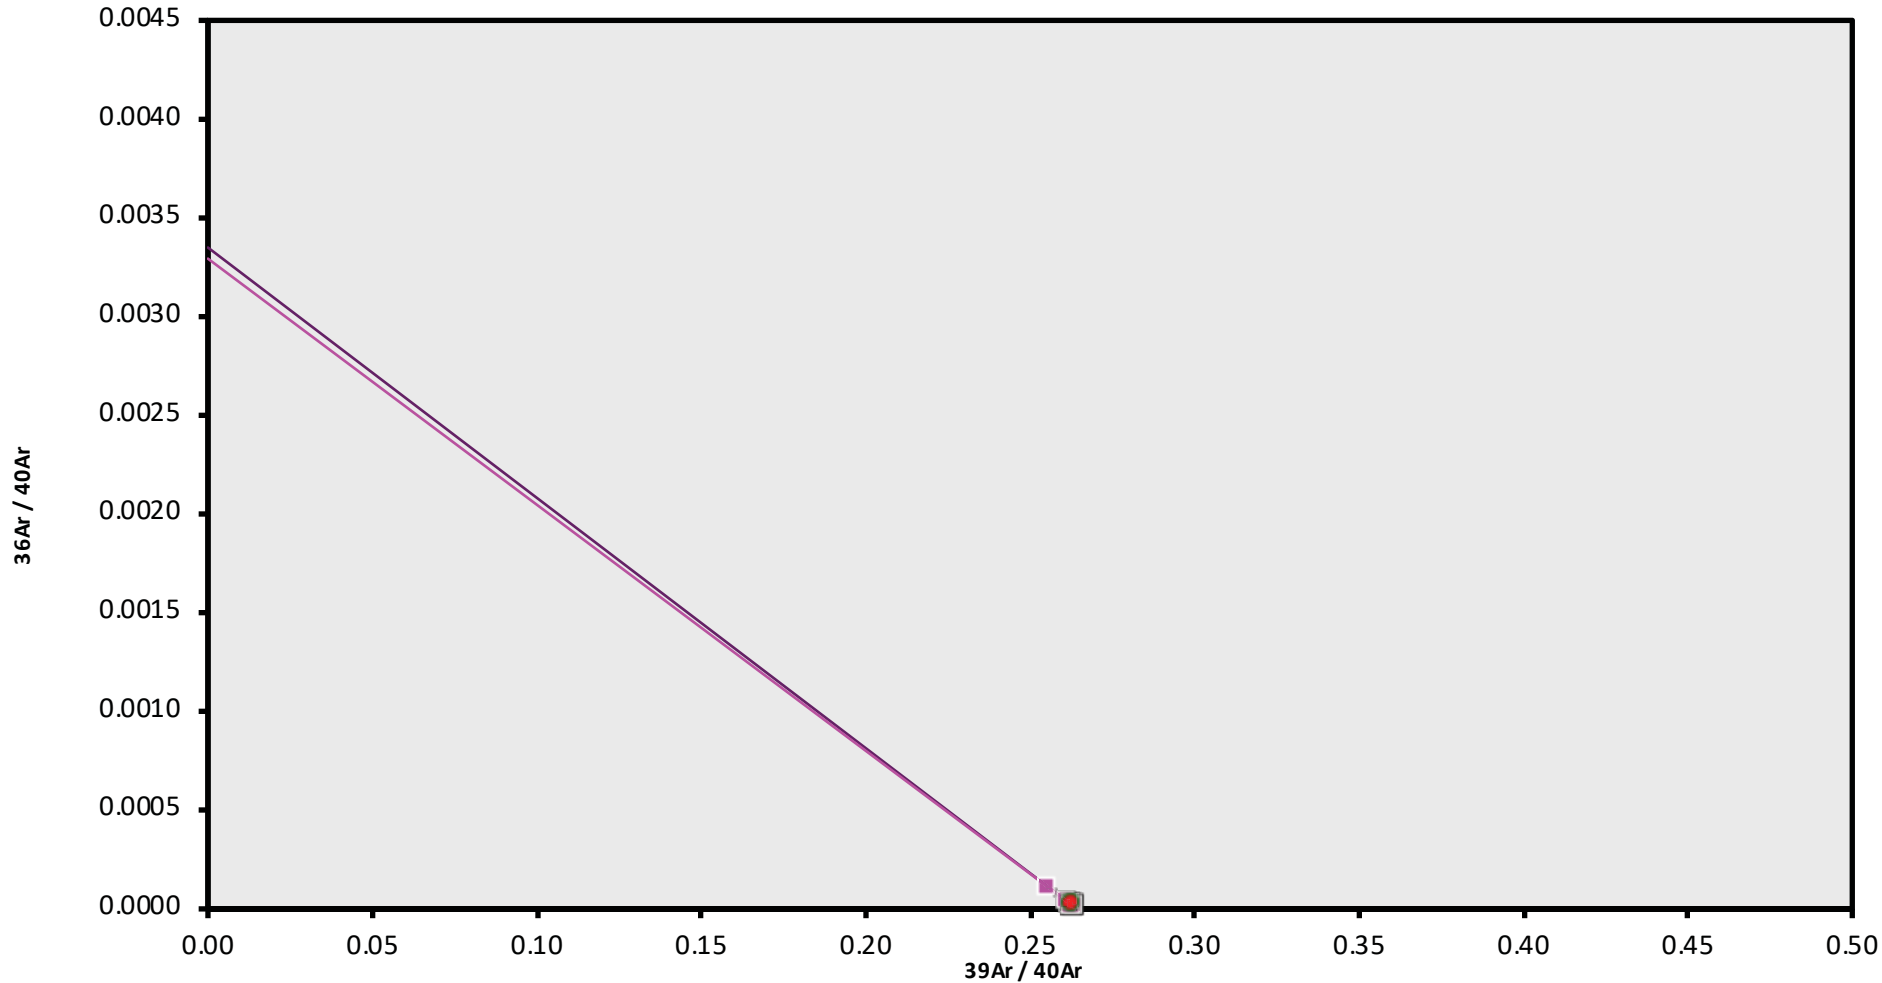

Ar-Ages in ka

WEIGHTED PLATEAU  
11082.7 ± 34.4  
TOTAL FUSION  
11085.1 ± 34.1  
NORMAL ISOCHRON  
11089.6 ± 35.1  
INVERSE ISOCHRON  
11081.8 ± 35.0

MSWD (PROBABILITY)

Sample Info

Sanidine  
Rhyolite Dome  
Dan Miggins

| Relative Abundances |        |   | 36Ar<br>[fA] | %1σ    | 37Ar<br>[fA] | %1σ    | 38Ar<br>[fA] | %1σ   | 39Ar<br>[fA] | %1σ   | 40Ar<br>[fA] | %1σ   | 40(r)/39(k) ± 2σ | Age ± 2σ<br>(Ma) | 40Ar(r)<br>(%) | 39Ar(k)<br>(%) | K/Ca ± 2σ  |
|---------------------|--------|---|--------------|--------|--------------|--------|--------------|-------|--------------|-------|--------------|-------|------------------|------------------|----------------|----------------|------------|
| 20F23094            | 17.0 % | ✓ | 0.07777978   | 0.707  | 4.576763     | 2.514  | 5.567282     | 0.175 | 461.7284     | 0.039 | 1813.254     | 0.004 | 3.87701 ±0.00314 | 11.48 ±0.01      | 98.72          | 6.88           | 43.4 ±2.2  |
| 20F23095            | 17.0 % | ✓ | 0.0653624    | 0.765  | 6.691701     | 1.739  | 4.559642     | 0.219 | 376.8635     | 0.039 | 1480.404     | 0.004 | 3.87731 ±0.00317 | 11.48 ±0.01      | 98.70          | 5.62           | 24.2 ±0.8  |
| 20F23097            | 17.0 % | ✓ | 0.0703291    | 0.748  | 4.119058     | 2.738  | 4.463344     | 0.235 | 369.7538     | 0.039 | 1453.611     | 0.004 | 3.87483 ±0.00318 | 11.47 ±0.01      | 98.56          | 5.51           | 38.6 ±2.1  |
| 20F23098            | 17.0 % | ✓ | 0.0681758    | 0.732  | 3.461288     | 3.058  | 3.571366     | 0.262 | 293.9522     | 0.040 | 1160.053     | 0.004 | 3.87753 ±0.00327 | 11.48 ±0.01      | 98.25          | 4.38           | 36.5 ±2.2  |
| 20F23100            | 17.0 % | ✓ | 0.0307469    | 1.241  | 2.403077     | 4.329  | 3.166062     | 0.319 | 262.7441     | 0.040 | 1025.797     | 0.005 | 3.86938 ±0.00321 | 11.45 ±0.01      | 99.11          | 3.92           | 47.0 ±4.1  |
| 20F23101            | 17.0 % | ✓ | 0.0376366    | 1.139  | 4.454078     | 2.434  | 5.249865     | 0.215 | 436.2474     | 0.039 | 1702.224     | 0.003 | 3.87645 ±0.00311 | 11.48 ±0.01      | 99.35          | 6.50           | 42.1 ±2.1  |
| 20F23103            | 17.0 % | ✓ | 0.8423462    | 0.226  | 2.503610     | 4.550  | 3.199069     | 0.303 | 253.6029     | 0.040 | 1232.552     | 0.004 | 3.86871 ±0.00583 | 11.45 ±0.02      | 79.60          | 3.78           | 43.6 ±4.0  |
| 20F23104            | 17.0 % | ✓ | 0.0242341    | 1.628  | 2.221701     | 5.236  | 2.173359     | 0.432 | 180.3738     | 0.040 | 704.101      | 0.006 | 3.86387 ±0.00340 | 11.44 ±0.01      | 98.98          | 2.69           | 34.9 ±3.7  |
| 20F23106            | 17.0 % | ✓ | 0.0047923    | 6.289  | 1.963720     | 5.736  | 2.368969     | 0.421 | 195.5992     | 0.040 | 759.253      | 0.007 | 3.87459 ±0.00328 | 11.47 ±0.01      | 99.82          | 2.92           | 42.8 ±4.9  |
| 20F23107            | 17.0 % | ✓ | 0.1109652    | 0.560  | 3.674943     | 3.076  | 4.175281     | 0.247 | 342.3764     | 0.039 | 1360.185     | 0.004 | 3.87630 ±0.00326 | 11.47 ±0.01      | 97.57          | 5.10           | 40.1 ±2.5  |
| 20F23109            | 17.0 % | ✓ | 0.0146588    | 2.451  | 3.144421     | 3.542  | 4.059439     | 0.256 | 336.5453     | 0.040 | 1308.512     | 0.004 | 3.87524 ±0.00315 | 11.47 ±0.01      | 99.67          | 5.02           | 46.0 ±3.3  |
| 20F23110            | 17.0 % | ✓ | 0.0644180    | 0.786  | 3.142744     | 3.685  | 3.644168     | 0.258 | 303.3761     | 0.039 | 1195.916     | 0.004 | 3.87888 ±0.00324 | 11.48 ±0.01      | 98.40          | 4.52           | 41.5 ±3.1  |
| 20F23112            | 17.0 % | ✓ | 0.0038715    | 7.909  | 2.353062     | 4.881  | 2.170197     | 0.429 | 181.8043     | 0.040 | 705.145      | 0.006 | 3.87270 ±0.00329 | 11.46 ±0.01      | 99.85          | 2.71           | 33.2 ±3.2  |
| 20F23113            | 17.0 % | ✓ | 0.0202654    | 1.663  | 1.819743     | 5.737  | 1.624311     | 0.547 | 133.7483     | 0.041 | 523.191      | 0.007 | 3.86705 ±0.00353 | 11.45 ±0.01      | 98.86          | 1.99           | 31.6 ±3.6  |
| 20F23115            | 17.0 % | ✓ | 0.0015935    | 20.358 | 0.977498     | 11.188 | 1.248989     | 0.712 | 103.8267     | 0.041 | 402.738      | 0.008 | 3.87454 ±0.00377 | 11.47 ±0.01      | 99.89          | 1.55           | 45.7 ±10.2 |
| 20F23116            | 17.0 % | ✓ | 0.0120903    | 3.217  | 2.520106     | 4.481  | 2.917240     | 0.306 | 245.2162     | 0.039 | 954.199      | 0.005 | 3.87679 ±0.00323 | 11.48 ±0.01      | 99.63          | 3.66           | 41.8 ±3.7  |
| 20F23118            | 17.0 % |   | 1.7982289    | 0.189  | 2.261438     | 4.924  | 2.283152     | 0.411 | 158.5601     | 0.040 | 1148.127     | 0.004 | 3.85558 ±0.01492 | 11.41 ±0.04      | 53.25          | 2.36           | 30.1 ±3.0  |
| 20F23119            | 17.0 % | ✓ | 0.0208545    | 1.734  | 2.370143     | 4.861  | 2.322310     | 0.404 | 190.3038     | 0.040 | 742.921      | 0.006 | 3.87158 ±0.00335 | 11.46 ±0.01      | 99.17          | 2.84           | 34.5 ±3.4  |
| 20F23121            | 17.0 % | ✓ | 0.0065730    | 4.734  | 1.581968     | 6.721  | 1.879247     | 0.517 | 155.9754     | 0.041 | 604.962      | 0.007 | 3.86623 ±0.00340 | 11.45 ±0.01      | 99.68          | 2.33           | 42.4 ±5.7  |
| 20F23122            | 17.0 % | ✓ | 0.0087537    | 3.156  | 1.506002     | 7.214  | 1.600312     | 0.627 | 133.9538     | 0.041 | 521.281      | 0.007 | 3.87232 ±0.00343 | 11.46 ±0.01      | 99.51          | 2.00           | 38.2 ±5.5  |
| 20F23124            | 17.0 % | ✓ | 0.0054915    | 5.915  | 1.909986     | 5.786  | 2.036990     | 0.459 | 167.9953     | 0.040 | 652.420      | 0.006 | 3.87415 ±0.00337 | 11.47 ±0.01      | 99.76          | 2.50           | 37.8 ±4.4  |
| 20F23125            | 17.0 % | ✓ | 0.0021513    | 14.593 | 1.056935     | 10.870 | 1.171761     | 0.765 | 96.8959      | 0.042 | 375.723      | 0.009 | 3.87127 ±0.00383 | 11.46 ±0.01      | 99.84          | 1.44           | 39.4 ±8.6  |
| 20F23127            | 17.0 % | ✓ | 0.0195910    | 1.838  | 1.794390     | 6.336  | 1.798111     | 0.510 | 150.2263     | 0.040 | 588.073      | 0.006 | 3.87603 ±0.00348 | 11.47 ±0.01      | 99.01          | 2.24           | 36.0 ±4.6  |
| 20F23128            | 17.0 % | ✓ | 0.0130059    | 2.765  | 2.622478     | 4.385  | 2.920939     | 0.336 | 243.1300     | 0.040 | 946.018      | 0.005 | 3.87532 ±0.00324 | 11.47 ±0.01      | 99.60          | 3.62           | 39.9 ±3.5  |
| 20F23130            | 17.0 % | ✓ | 0.0173615    | 2.025  | 1.224939     | 8.893  | 1.288796     | 0.740 | 106.2066     | 0.041 | 416.863      | 0.008 | 3.87657 ±0.00379 | 11.48 ±0.01      | 98.76          | 1.58           | 37.3 ±6.6  |
| 20F23131            | 17.0 % | ✓ | 0.0004396    | 61.939 | 1.884485     | 5.420  | 1.675277     | 0.581 | 138.5376     | 0.041 | 537.304      | 0.007 | 3.87798 ±0.00343 | 11.48 ±0.01      | 99.99          | 2.07           | 31.6 ±3.4  |
| 20F23133            | 17.0 % | ✓ | 0.0100866    | 3.204  | 1.017429     | 11.396 | 1.234862     | 0.747 | 102.5866     | 0.041 | 400.159      | 0.009 | 3.87155 ±0.00379 | 11.46 ±0.01      | 99.25          | 1.53           | 43.4 ±9.9  |
| 20F23134            | 17.0 % | ✓ | 0.0281107    | 1.506  | 2.229740     | 4.818  | 2.306053     | 0.421 | 190.1484     | 0.040 | 745.030      | 0.006 | 3.87438 ±0.00340 | 11.47 ±0.01      | 98.88          | 2.83           | 36.7 ±3.5  |
| 20F23136            | 17.0 % | ✓ | 0.0075125    | 4.046  | 1.460846     | 7.668  | 1.396263     | 0.566 | 131.9079     | 0.041 | 513.352      | 0.008 | 3.87506 ±0.00351 | 11.47 ±0.01      | 99.57          | 1.97           | 38.8 ±6.0  |
| 20F23137            | 17.0 % | ✓ | 0.0564933    | 0.861  | 3.210784     | 3.552  | 3.183141     | 0.290 | 264.0977     | 0.039 | 1040.565     | 0.005 | 3.87661 ±0.00328 | 11.48 ±0.01      | 98.39          | 3.94           | 35.4 ±2.5  |
| Σ                   |        |   | 3.4439380    | 0.129  | 76.159079    | 0.802  | 81.455799    | 0.065 | 6708.2838    | 0.008 | 27013.933    | 0.001 |                  |                  |                |                |            |

| Information on Analysis and Constants Used in Calculations |  |
|------------------------------------------------------------|--|
| Project = <b>SWENTON (20-01)</b>                           |  |
| Sample = <b>VS19-104</b>                                   |  |
| Material = <b>Sanidine</b>                                 |  |
| Location = <b>Rhyolite Dome</b>                            |  |
| Region = <b>Eastern Oregon</b>                             |  |
| Analyst = <b>Dan Miggins</b>                               |  |
| Irradiation = <b>20-OSU-01 (1C35-20)</b>                   |  |
| Position = <b>X: 0   Y: 0   Z/H: 43.98167 mm</b>           |  |
| FCT-NM Age = <b>28.201 ±0.023 Ma</b>                       |  |
| FCT-NM Reference = <b>Kuiper et al (2008)</b>              |  |
| FCT-NM 40Ar/39Ar Ratio = <b>9.57019 ±0.01483</b>           |  |
| FCT-NMJ -value = <b>0.00162228 ±0.00000251</b>             |  |
| Air Shot 40Ar/36Ar = <b>298.2180 ±0.3430</b>               |  |
| Air Shot MDF = <b>1.00028707 ±0.00038858 (LIN)</b>         |  |
| Experiment Type = <b>Total Fusion</b>                      |  |
| Extraction Method = <b>Single Crystal Laser Heating</b>    |  |
| Heating = <b>62 sec</b>                                    |  |
| Isolation = <b>1.62 min</b>                                |  |
| Instrument = <b>ARGUS-VI-F</b>                             |  |
| Preferred Age = <b>Ideogram Age</b>                        |  |
| Age Classification = <b>Eruption Age</b>                   |  |
| IGSN = <b>Undefined</b>                                    |  |
| Rock Class = <b>Undefined</b>                              |  |
| Lithology = <b>Undefined</b>                               |  |
| Lat-Lon = <b>Undefined - Undefined</b>                     |  |

| Results                         | 40(a)/36(a) ± 2σ    | 40(r)/39(k) ± 2σ        | Age ± 2σ<br>(Ma)                     | M\$WD               | 39Ar(k)<br>(%,n)                                             | K/Ca ± 2σ |
|---------------------------------|---------------------|-------------------------|--------------------------------------|---------------------|--------------------------------------------------------------|-----------|
| Age Plateau<br>Error Mean       |                     | 3.87404 ±0.00138 ±0.04% | 11.47 ±0.04 ±0.31%                   | 4.77 0% 1.53 2.1830 | 97.64 29                                                     | 33.7 ±2.9 |
|                                 |                     |                         | Full External Error Analytical Error |                     | 2σ Confidence Limit Error Magnification                      |           |
| Total Fusion Age                |                     | 3.87401 ±0.00076 ±0.02% | 11.47 ±0.04 ±0.31%                   |                     | 30                                                           | 37.9 ±0.6 |
|                                 |                     |                         | Full External Error Analytical Error |                     |                                                              |           |
| Normal Isochron<br>Error Chron  | 293.89 ±5.31 ±1.81% | 3.87793 ±0.00211 ±0.05% | 11.48 ±0.04 ±0.31%                   | 10.21 0% 3.1961 1   | 97.64 29                                                     |           |
|                                 |                     |                         | Full External Error Analytical Error | 1.54 3.1961 2       | 2σ Confidence Limit Error Magnification Number of Iterations |           |
|                                 |                     |                         |                                      | 0.0000000012        | Convergence                                                  |           |
| Inverse Isochron<br>Error Chron | 297.44 ±3.69 ±1.24% | 3.87421 ±0.00150 ±0.04% | 11.47 ±0.04 ±0.31%                   | 4.89 0% 2.2109 2    | 97.64 29                                                     |           |
|                                 |                     |                         | Full External Error Analytical Error | 1.54 2.2109 2       | 2σ Confidence Limit Error Magnification Number of Iterations |           |
|                                 |                     |                         |                                      | 0.0001164731 20%    | Convergence Spreading Factor                                 |           |

| Incremental Heating |        |   | 36Ar(a)<br>[fA] | 37Ar(ca)<br>[fA] | 38Ar(cl)<br>[fA] | 39Ar(k)<br>[fA] | 40Ar(r)<br>[fA] | Age ± 2σ<br>(Ma) | 40Ar(r)<br>(%) | 39Ar(k)<br>(%) | K/Ca ± 2σ  |
|---------------------|--------|---|-----------------|------------------|------------------|-----------------|-----------------|------------------|----------------|----------------|------------|
| 20F23094            | 17.0 % | ✓ | 0.0765607       | 4.576763         | 0.0000000        | 461.7254        | 1790.116        | 11.48 ±0.01      | 98.72          | 6.88           | 43.4 ±2.2  |
| 20F23095            | 17.0 % | ✓ | 0.0635536       | 6.691701         | 0.0000000        | 376.8592        | 1461.200        | 11.48 ±0.01      | 98.70          | 5.62           | 24.2 ±0.8  |
| 20F23097            | 17.0 % | ✓ | 0.0692157       | 4.119058         | 0.0000000        | 369.7511        | 1432.721        | 11.47 ±0.01      | 98.56          | 5.51           | 38.6 ±2.1  |
| 20F23098            | 17.0 % | ✓ | 0.0672385       | 3.461288         | 0.0080347        | 293.9500        | 1139.800        | 11.48 ±0.01      | 98.25          | 4.38           | 36.5 ±2.2  |
| 20F23100            | 17.0 % | ✓ | 0.0300974       | 2.403077         | 0.0000000        | 262.7426        | 1016.652        | 11.45 ±0.01      | 99.11          | 3.92           | 47.0 ±4.1  |
| 20F23101            | 17.0 % | ✓ | 0.0364327       | 4.454078         | 0.0000000        | 436.2446        | 1691.082        | 11.48 ±0.01      | 99.35          | 6.50           | 42.1 ±2.1  |
| 20F23103            | 17.0 % | ✓ | 0.8416695       | 2.503610         | 0.0000000        | 253.6013        | 981.109         | 11.45 ±0.02      | 79.60          | 3.78           | 43.6 ±4.0  |
| 20F23104            | 17.0 % | ✓ | 0.0236336       | 2.221701         | 0.0000000        | 180.3723        | 696.936         | 11.44 ±0.01      | 98.98          | 2.69           | 34.9 ±3.7  |
| 20F23106            | 17.0 % | ✓ | 0.0042603       | 1.963720         | 0.0055760        | 195.5979        | 757.863         | 11.47 ±0.01      | 99.82          | 2.92           | 42.8 ±4.9  |
| 20F23107            | 17.0 % | ✓ | 0.1099678       | 3.674943         | 0.0190398        | 342.3740        | 1327.145        | 11.47 ±0.01      | 97.57          | 5.10           | 40.1 ±2.5  |
| 20F23109            | 17.0 % | ✓ | 0.0138089       | 3.144421         | 0.0000000        | 336.5433        | 1304.185        | 11.47 ±0.01      | 99.67          | 5.02           | 46.0 ±3.3  |
| 20F23110            | 17.0 % | ✓ | 0.0635685       | 3.142744         | 0.0000000        | 303.3741        | 1176.753        | 11.48 ±0.01      | 98.40          | 4.52           | 41.5 ±3.1  |
| 20F23112            | 17.0 % | ✓ | 0.0032355       | 2.353062         | 0.0000000        | 181.8028        | 704.068         | 11.46 ±0.01      | 99.85          | 2.71           | 33.2 ±3.2  |
| 20F23113            | 17.0 % | ✓ | 0.0197725       | 1.819743         | 0.0049924        | 133.7471        | 517.206         | 11.45 ±0.01      | 98.86          | 1.99           | 31.6 ±3.6  |
| 20F23115            | 17.0 % | ✓ | 0.0013293       | 0.977498         | 0.0000000        | 103.8261        | 402.278         | 11.47 ±0.01      | 99.89          | 1.55           | 45.7 ±10.2 |
| 20F23116            | 17.0 % | ✓ | 0.0114091       | 2.520106         | 0.0000000        | 245.2146        | 950.644         | 11.48 ±0.01      | 99.63          | 3.66           | 41.8 ±3.7  |
| 20F23118            | 17.0 % |   | 1.7976114       | 2.261438         | 0.0289825        | 158.5586        | 611.336         | 11.41 ±0.04      | 53.25          | 2.36           | 30.1 ±3.0  |
| 20F23119            | 17.0 % | ✓ | 0.0202096       | 2.370143         | 0.0197928        | 190.3023        | 736.771         | 11.46 ±0.01      | 99.17          | 2.84           | 34.5 ±3.4  |
| 20F23121            | 17.0 % | ✓ | 0.0061454       | 1.581968         | 0.0000000        | 155.9744        | 603.033         | 11.45 ±0.01      | 99.68          | 2.33           | 42.4 ±5.7  |
| 20F23122            | 17.0 % | ✓ | 0.0083466       | 1.506002         | 0.0000000        | 133.9528        | 518.708         | 11.46 ±0.01      | 99.51          | 2.00           | 38.2 ±5.5  |
| 20F23124            | 17.0 % | ✓ | 0.0049738       | 1.909986         | 0.0068449        | 167.9941        | 650.833         | 11.47 ±0.01      | 99.76          | 2.50           | 37.8 ±4.4  |
| 20F23125            | 17.0 % | ✓ | 0.0018654       | 1.056935         | 0.0010160        | 96.8952         | 375.107         | 11.46 ±0.01      | 99.84          | 1.44           | 39.4 ±8.6  |
| 20F23127            | 17.0 % | ✓ | 0.0191060       | 1.794390         | 0.0000000        | 150.2251        | 582.278         | 11.47 ±0.01      | 99.01          | 2.24           | 36.0 ±4.6  |
| 20F23128            | 17.0 % | ✓ | 0.0122970       | 2.622478         | 0.0000000        | 243.1283        | 942.199         | 11.47 ±0.01      | 99.60          | 3.62           | 39.9 ±3.5  |
| 20F23130            | 17.0 % | ✓ | 0.0170299       | 1.224939         | 0.0027181        | 106.2058        | 411.714         | 11.48 ±0.01      | 98.76          | 1.58           | 37.3 ±6.6  |
| 20F23131            | 17.0 % | ✓ | 0.0000701       | 1.884485         | 0.0018477        | 138.5364        | 537.241         | 11.48 ±0.01      | 99.99          | 2.07           | 31.6 ±3.4  |
| 20F23133            | 17.0 % | ✓ | 0.0098116       | 1.017429         | 0.0000000        | 102.5860        | 397.167         | 11.46 ±0.01      | 99.25          | 1.53           | 43.4 ±9.9  |
| 20F23134            | 17.0 % | ✓ | 0.0275071       | 2.229740         | 0.0040619        | 190.1469        | 736.702         | 11.47 ±0.01      | 98.88          | 2.83           | 36.7 ±3.5  |
| 20F23136            | 17.0 % | ✓ | 0.0071173       | 1.460846         | 0.0016186        | 131.9069        | 511.147         | 11.47 ±0.01      | 99.57          | 1.97           | 38.8 ±6.0  |
| 20F23137            | 17.0 % | ✓ | 0.0556255       | 3.210784         | 0.0000000        | 264.0956        | 1023.797        | 11.48 ±0.01      | 98.39          | 3.94           | 35.4 ±2.5  |
| Σ                   |        |   | 3.4233298       | 76.159079        | 0.1045253        | 6708.2349       | 25987.792       |                  |                |                |            |

| Information on Analysis                                                                                                                                                                                                                                 | Results                   | 40(r)/39(k) ± 2σ        | Age ± 2σ<br>(Ma)   | M<br>SWD                     | 39Ar(k)<br>(%,n)                                          | K/Ca ± 2σ |
|---------------------------------------------------------------------------------------------------------------------------------------------------------------------------------------------------------------------------------------------------------|---------------------------|-------------------------|--------------------|------------------------------|-----------------------------------------------------------|-----------|
| Project = SWENTON (20-01)<br>Sample = VS19-104<br>Material = Sanidine<br>Location = Rhyolite Dome<br>Region = Eastern Oregon<br>Analyst = Dan Miggins<br>Irradiation = 20-OSU-01 (1C35-20)<br>J = 0.00162228 ± 0.00000251<br>FCT-NM = 28.201 ± 0.023 Ma | Age Plateau<br>Error Mean | 3.87404 ±0.00138 ±0.04% | 11.47 ±0.04 ±0.31% | 4.77<br>0%<br>1.53<br>2.1830 | 97.64<br>29<br>2σ Confidence Limit<br>Error Magnification | 33.7 ±2.9 |
|                                                                                                                                                                                                                                                         | Total Fusion Age          | 3.87401 ±0.00076 ±0.02% | 11.47 ±0.04 ±0.31% |                              | 30                                                        | 37.9 ±0.6 |

| Normal Isochron |        |   | 39(k)/36(a) ± 2σ        | 40(a+r)/36(a) ± 2σ      | r.i.   |
|-----------------|--------|---|-------------------------|-------------------------|--------|
| 20F23094        | 17.0 % | ✓ | 6030.84 ±86.87          | 23680.21 ±340.60        | 0.9985 |
| 20F23095        | 17.0 % | ✓ | 5929.78 ±93.59          | 23290.17 ±367.16        | 0.9987 |
| 20F23097        | 17.0 % | ✓ | 5342.01 ±81.46          | 20997.93 ±319.77        | 0.9987 |
| 20F23098        | 17.0 % | ✓ | 4371.75 ±65.06          | 17250.14 ±256.34        | 0.9986 |
| 20F23100        | 17.0 % | ✓ | 8729.76 ±222.01         | 34077.34 ±866.23        | 0.9995 |
| 20F23101        | 17.0 % | ✓ | 11973.98 ±282.53        | 46715.15 ±1101.65       | 0.9994 |
| 20F23103        | 17.0 % | ✓ | 301.31 ±1.38            | 1464.23 ±6.63           | 0.9848 |
| 20F23104        | 17.0 % | ✓ | 7632.04 ±255.74         | 29787.77 ±997.86        | 0.9997 |
| 20F23106        | 17.0 % | ✓ | 45911.77 ±6529.73       | 178188.05 ±25342.11     | 1.0000 |
| 20F23107        | 17.0 % | ✓ | 3113.40 ±35.32          | 12367.05 ±139.96        | 0.9976 |
| 20F23109        | 17.0 % | ✓ | 24371.56 ±1273.02       | 94744.14 ±4948.27       | 0.9999 |
| 20F23110        | 17.0 % | ✓ | 4772.39 ±76.27          | 18810.12 ±300.25        | 0.9988 |
| 20F23112        | 17.0 % | ✓ | 56190.15 ±10689.76      | 217906.34 ±41454.73     | 1.0000 |
| 20F23113        | 17.0 % | ✓ | 6764.31 ±231.48         | 26456.44 ±905.10        | 0.9997 |
| 20F23115        | 17.0 % | ✓ | 78106.27 ±38280.92      | 302924.59 ±148467.17    | 1.0000 |
| 20F23116        | 17.0 % | ✓ | 21492.95 ±1469.88       | 83622.13 ±5718.46       | 0.9999 |
| 20F23118        | 17.0 % |   | 88.21 ±0.34             | 638.64 ±2.41            | 0.9775 |
| 20F23119        | 17.0 % | ✓ | 9416.44 ±338.29         | 36755.10 ±1320.14       | 0.9997 |
| 20F23121        | 17.0 % | ✓ | 25380.78 ±2581.04       | 98426.49 ±10008.96      | 1.0000 |
| 20F23122        | 17.0 % | ✓ | 16048.83 ±1068.50       | 62444.75 ±4157.13       | 0.9999 |
| 20F23124        | 17.0 % | ✓ | 33775.96 ±4430.52       | 131151.55 ±17203.32     | 1.0000 |
| 20F23125        | 17.0 % | ✓ | 51942.79 ±17569.38      | 201383.12 ±68116.61     | 1.0000 |
| 20F23127        | 17.0 % | ✓ | 7862.74 ±297.53         | 30774.79 ±1164.26       | 0.9998 |
| 20F23128        | 17.0 % | ✓ | 19771.28 ±1160.68       | 76918.52 ±4515.14       | 0.9999 |
| 20F23130        | 17.0 % | ✓ | 6236.45 ±258.51         | 24474.55 ±1014.32       | 0.9998 |
| 20F23131        | 17.0 % | ✓ | 1975170.69 ±15415788.52 | 7659368.09 ±59779743.82 | 1.0000 |
| 20F23133        | 17.0 % | ✓ | 10455.59 ±692.11        | 40777.97 ±2699.11       | 0.9999 |
| 20F23134        | 17.0 % | ✓ | 6912.65 ±213.39         | 27080.78 ±835.69        | 0.9997 |
| 20F23136        | 17.0 % | ✓ | 18533.39 ±1591.07       | 72116.57 ±6190.84       | 1.0000 |
| 20F23137        | 17.0 % | ✓ | 4747.75 ±83.31          | 18703.74 ±327.87        | 0.9990 |

| Results         | 40(a)/36(a) ± 2σ      | 40(r)/39(k) ± 2σ | Age ± 2σ (Ma)             | MSWD            |
|-----------------|-----------------------|------------------|---------------------------|-----------------|
| Normal Isochron | 293.89 ±5.31          | 3.87793 ±0.00211 | 11.48 ±0.04               | 10.21           |
| Error Chron     | ±1.81%                | ±0.05%           | ±0.31%                    | 0%              |
|                 |                       |                  | Full External Error ±0.60 |                 |
|                 |                       |                  | Analytical Error ±0.01    |                 |
|                 |                       |                  |                           |                 |
| Statistics      | 2σ Confidence Limit   | 1.54             | Convergence               | 0.000000001152  |
|                 | Error Magnification   | 3.1961           | Number of Iterations      | 1               |
|                 | Number of Data Points | 29               | Calculated Line           | Weighted York-2 |

| Inverse Isochron |        |   | 39(k)/40(a+r) ± 2σ   | 36(a)/40(a+r) ± 2σ     | r.i.   |
|------------------|--------|---|----------------------|------------------------|--------|
| 20F23094         | 17.0 % | ✓ | 0.2546785 ±0.0002010 | 0.00004223 ±0.00000061 | 0.0005 |
| 20F23095         | 17.0 % | ✓ | 0.2546045 ±0.0002017 | 0.00004294 ±0.00000068 | 0.0005 |
| 20F23097         | 17.0 % | ✓ | 0.2544066 ±0.0002013 | 0.00004762 ±0.00000073 | 0.0006 |
| 20F23098         | 17.0 % | ✓ | 0.2534326 ±0.0002026 | 0.00005797 ±0.00000086 | 0.0007 |
| 20F23100         | 17.0 % | ✓ | 0.2561748 ±0.0002047 | 0.00002935 ±0.00000075 | 0.0005 |
| 20F23101         | 17.0 % | ✓ | 0.2563190 ±0.0002019 | 0.00002141 ±0.00000050 | 0.0003 |
| 20F23103         | 17.0 % | ✓ | 0.2057788 ±0.0001644 | 0.00068295 ±0.00000309 | 0.0019 |
| 20F23104         | 17.0 % | ✓ | 0.2562137 ±0.0002076 | 0.00003357 ±0.00000112 | 0.0005 |
| 20F23106         | 17.0 % | ✓ | 0.2576591 ±0.0002090 | 0.00000561 ±0.00000080 | 0.0002 |
| 20F23107         | 17.0 % | ✓ | 0.2517498 ±0.0001993 | 0.00008086 ±0.00000092 | 0.0008 |
| 20F23109         | 17.0 % | ✓ | 0.2572355 ±0.0002048 | 0.00001055 ±0.00000055 | 0.0002 |
| 20F23110         | 17.0 % | ✓ | 0.2537142 ±0.0002016 | 0.00005316 ±0.00000085 | 0.0007 |
| 20F23112         | 17.0 % | ✓ | 0.2578638 ±0.0002087 | 0.00000459 ±0.00000087 | 0.0001 |
| 20F23113         | 17.0 % | ✓ | 0.2556771 ±0.0002110 | 0.00003780 ±0.00000129 | 0.0008 |
| 20F23115         | 17.0 % | ✓ | 0.2578406 ±0.0002175 | 0.00000330 ±0.00000162 | 0.0001 |
| 20F23116         | 17.0 % | ✓ | 0.2570247 ±0.0002044 | 0.00001196 ±0.00000082 | 0.0002 |
| 20F23118         | 17.0 % |   | 0.1381136 ±0.0001125 | 0.00156582 ±0.00000591 | 0.0025 |
| 20F23119         | 17.0 % | ✓ | 0.2561942 ±0.0002083 | 0.00002721 ±0.00000098 | 0.0005 |
| 20F23121         | 17.0 % | ✓ | 0.2578653 ±0.0002122 | 0.00001016 ±0.00000103 | 0.0002 |
| 20F23122         | 17.0 % | ✓ | 0.2570085 ±0.0002122 | 0.00001601 ±0.00000107 | 0.0004 |
| 20F23124         | 17.0 % | ✓ | 0.2575338 ±0.0002100 | 0.00000762 ±0.00000100 | 0.0002 |
| 20F23125         | 17.0 % | ✓ | 0.2579302 ±0.0002196 | 0.00000497 ±0.00000168 | 0.0001 |
| 20F23127         | 17.0 % | ✓ | 0.2554927 ±0.0002089 | 0.00003249 ±0.00000123 | 0.0005 |
| 20F23128         | 17.0 % | ✓ | 0.2570419 ±0.0002067 | 0.00001300 ±0.00000076 | 0.0002 |
| 20F23130         | 17.0 % | ✓ | 0.2548134 ±0.0002118 | 0.00004086 ±0.00000169 | 0.0007 |
| 20F23131         | 17.0 % | ✓ | 0.2578765 ±0.0002139 | 0.00000013 ±0.00000102 | 0.0000 |
| 20F23133         | 17.0 % | ✓ | 0.2564030 ±0.0002176 | 0.00002452 ±0.00000162 | 0.0006 |
| 20F23134         | 17.0 % | ✓ | 0.2552602 ±0.0002060 | 0.00003693 ±0.00000114 | 0.0006 |
| 20F23136         | 17.0 % | ✓ | 0.2569921 ±0.0002137 | 0.00001387 ±0.00000119 | 0.0003 |
| 20F23137         | 17.0 % | ✓ | 0.2538394 ±0.0002018 | 0.00005347 ±0.00000094 | 0.0007 |

| Results          | 40(a)/36(a) ± 2σ      | 40(r)/39(k) ± 2σ | Age ± 2σ (Ma)             | MSWD            |
|------------------|-----------------------|------------------|---------------------------|-----------------|
| Inverse Isochron | 297.44 ±3.69          | 3.87421 ±0.00150 | 11.47 ±0.04               | 4.89            |
| Error Chron      | ±1.24%                | ±0.04%           | ±0.31%                    | 0%              |
|                  |                       |                  | Full External Error ±0.60 |                 |
|                  |                       |                  | Analytical Error ±0.00    |                 |
|                  |                       |                  |                           |                 |
| Statistics       | 2σ Confidence Limit   | 1.54             | Convergence               | 0.0001164731    |
|                  | Error Magnification   | 2.2109           | Number of Iterations      | 2               |
|                  | Number of Data Points | 29               | Calculated Line           | Weighted York-2 |
|                  | Spreading Factor      | 20.2%            |                           |                 |

| Degassing<br>Patterns |        | 36Ar(a)<br>[fA] |           | %1σ    | 36Ar(c)<br>[fA] | %1σ  | 36Ar(ca)<br>[fA] | %1σ   | 36Ar(cl)<br>[fA] | %1σ    | 37Ar(ca)<br>[fA] | %1σ   | 38Ar(a)<br>[fA] | %1σ    | 38Ar(c)<br>[fA] | %1σ  | 38Ar(k)<br>[fA] | %1σ  | 38Ar(ca)<br>[fA] | %1σ   | 38Ar(cl)<br>[fA] | %1σ    | 39Ar(k)<br>[fA] | %1σ  | 39Ar(ca)<br>[fA] | %1σ   | 40Ar(r)<br>[fA] | %1σ  | 40Ar(a)<br>[fA] | %1σ    | 40Ar(c)<br>[fA] | %1σ  | 40Ar(k)<br>[fA] | %1σ  |
|-----------------------|--------|-----------------|-----------|--------|-----------------|------|------------------|-------|------------------|--------|------------------|-------|-----------------|--------|-----------------|------|-----------------|------|------------------|-------|------------------|--------|-----------------|------|------------------|-------|-----------------|------|-----------------|--------|-----------------|------|-----------------|------|
|                       |        |                 |           |        |                 |      |                  |       |                  |        |                  |       |                 |        |                 |      |                 |      |                  |       |                  |        |                 |      |                  |       |                 |      |                 |        |                 |      |                 |      |
| 20F23094              | 17.0 % | ✓               | 0.0765607 | 0.72   | 0.0000000       | 0.00 | 0.0012371        | 2.52  | 0.0000000        | 0.00   | 4.576763         | 2.51  | 0.0144317       | 0.74   | 0.0000000       | 0.00 | 5.576258        | 0.10 | 0.0008238        | 9.95  | 0.0000000        | 0.00   | 461.7254        | 0.04 | 0.0029406        | 2.68  | 1790.116        | 0.01 | 22.8580         | 0.73   | 0.0000000       | 0.00 | 0.2802673       | 9.65 |
| 20F23095              | 17.0 % | ✓               | 0.0635536 | 0.79   | 0.0000000       | 0.00 | 0.0018088        | 1.75  | 0.0000000        | 0.00   | 6.691701         | 1.74  | 0.0119799       | 0.80   | 0.0000000       | 0.00 | 4.551329        | 0.10 | 0.0012045        | 9.79  | 0.0000000        | 0.00   | 376.8592        | 0.04 | 0.0042994        | 1.97  | 1461.200        | 0.01 | 18.9746         | 0.80   | 0.0000000       | 0.00 | 0.2287536       | 9.65 |
| 20F23097              | 17.0 % | ✓               | 0.0692157 | 0.76   | 0.0000000       | 0.00 | 0.0011134        | 2.74  | 0.0000000        | 0.00   | 4.119058         | 2.74  | 0.0130472       | 0.78   | 0.0000000       | 0.00 | 4.465484        | 0.10 | 0.0007414        | 10.01 | 0.0000000        | 0.00   | 369.7511        | 0.04 | 0.0026465        | 2.89  | 1432.721        | 0.01 | 20.6650         | 0.77   | 0.0000000       | 0.00 | 0.2244389       | 9.65 |
| 20F23098              | 17.0 % | ✓               | 0.0672385 | 0.74   | 0.0000000       | 0.00 | 0.0009356        | 3.06  | 0.0000017        | 159.21 | 3.461288         | 3.06  | 0.0126745       | 0.76   | 0.0000000       | 0.00 | 3.550034        | 0.10 | 0.0006230        | 10.10 | 0.0080347        | 159.21 | 293.9500        | 0.04 | 0.0022239        | 3.19  | 1139.800        | 0.01 | 20.0747         | 0.75   | 0.0000000       | 0.00 | 0.1784276       | 9.65 |
| 20F23100              | 17.0 % | ✓               | 0.0300974 | 1.27   | 0.0000000       | 0.00 | 0.0006496        | 4.33  | 0.0000000        | 0.00   | 2.403077         | 4.33  | 0.0056734       | 1.28   | 0.0000000       | 0.00 | 3.173142        | 0.10 | 0.0004326        | 10.56 | 0.0000000        | 0.00   | 262.7426        | 0.04 | 0.0015440        | 4.43  | 1016.652        | 0.01 | 8.9859          | 1.28   | 0.0000000       | 0.00 | 0.1594847       | 9.65 |
| 20F23101              | 17.0 % | ✓               | 0.0364327 | 1.18   | 0.0000000       | 0.00 | 0.0012039        | 2.44  | 0.0000000        | 0.00   | 4.454078         | 2.43  | 0.0068676       | 1.19   | 0.0000000       | 0.00 | 5.268526        | 0.10 | 0.0008017        | 9.93  | 0.0000000        | 0.00   | 436.2446        | 0.04 | 0.0028617        | 2.60  | 1691.082        | 0.01 | 10.8774         | 1.18   | 0.0000000       | 0.00 | 0.2648005       | 9.65 |
| 20F23103              | 17.0 % | ✓               | 0.8416695 | 0.23   | 0.0000000       | 0.00 | 0.0006767        | 4.55  | 0.0000000        | 0.00   | 2.503610         | 4.55  | 0.1586547       | 0.28   | 0.0000000       | 0.00 | 3.062743        | 0.10 | 0.0004506        | 10.65 | 0.0000000        | 0.00   | 253.6013        | 0.04 | 0.0016086        | 4.64  | 981.109         | 0.06 | 251.2889        | 0.25   | 0.0000000       | 0.00 | 0.1539360       | 9.65 |
| 20F23104              | 17.0 % | ✓               | 0.0236336 | 1.67   | 0.0000000       | 0.00 | 0.0006005        | 5.24  | 0.0000000        | 0.00   | 2.221701         | 5.24  | 0.0044549       | 1.68   | 0.0000000       | 0.00 | 2.178357        | 0.10 | 0.0003999        | 10.96 | 0.0000000        | 0.00   | 180.3723        | 0.04 | 0.0014274        | 5.32  | 696.936         | 0.02 | 7.0560          | 1.68   | 0.0000000       | 0.00 | 0.1094860       | 9.65 |
| 20F23106              | 17.0 % | ✓               | 0.0042603 | 7.11   | 0.0000000       | 0.00 | 0.0005308        | 5.74  | 0.0000012        | 207.04 | 1.963720         | 5.74  | 0.0008031       | 7.11   | 0.0000000       | 0.00 | 2.362236        | 0.10 | 0.0003535        | 11.21 | 0.0055760        | 207.04 | 195.5979        | 0.04 | 0.0012617        | 5.81  | 757.863         | 0.01 | 1.2720          | 7.11   | 0.0000000       | 0.00 | 0.1187280       | 9.65 |
| 20F23107              | 17.0 % | ✓               | 0.1099678 | 0.57   | 0.0000000       | 0.00 | 0.0009933        | 3.08  | 0.0000041        | 76.22  | 3.674943         | 3.08  | 0.0207289       | 0.59   | 0.0000000       | 0.00 | 4.134851        | 0.10 | 0.0006615        | 10.11 | 0.0190398        | 76.23  | 342.3740        | 0.04 | 0.0023612        | 3.21  | 1327.145        | 0.01 | 32.8320         | 0.58   | 0.0000000       | 0.00 | 0.2078210       | 9.65 |
| 20F23109              | 17.0 % | ✓               | 0.0138089 | 2.61   | 0.0000000       | 0.00 | 0.0008499        | 3.55  | 0.0000000        | 0.00   | 3.144421         | 3.54  | 0.0026030       | 2.62   | 0.0000000       | 0.00 | 4.064434        | 0.10 | 0.0005660        | 10.26 | 0.0000000        | 0.00   | 336.5433        | 0.04 | 0.0020203        | 3.66  | 1304.185        | 0.01 | 4.1228          | 2.61   | 0.0000000       | 0.00 | 0.2042818       | 9.65 |
| 20F23110              | 17.0 % | ✓               | 0.0635685 | 0.80   | 0.0000000       | 0.00 | 0.0008495        | 3.69  | 0.0000000        | 0.00   | 3.142744         | 3.69  | 0.0119827       | 0.81   | 0.0000000       | 0.00 | 3.663849        | 0.10 | 0.0005657        | 10.31 | 0.0000000        | 0.00   | 303.3741        | 0.04 | 0.0020192        | 3.80  | 1176.753        | 0.01 | 18.9790         | 0.80   | 0.0000000       | 0.00 | 0.1841481       | 9.65 |
| 20F23112              | 17.0 % | ✓               | 0.0032355 | 9.51   | 0.0000000       | 0.00 | 0.0006360        | 4.88  | 0.0000000        | 0.00   | 2.353062         | 4.88  | 0.0006099       | 9.51   | 0.0000000       | 0.00 | 2.195632        | 0.10 | 0.0004236        | 10.80 | 0.0000000        | 0.00   | 181.8028        | 0.04 | 0.0015118        | 4.97  | 704.068         | 0.01 | 0.9660          | 9.51   | 0.0000000       | 0.00 | 0.1103543       | 9.65 |
| 20F23113              | 17.0 % | ✓               | 0.0197725 | 1.71   | 0.0000000       | 0.00 | 0.0004919        | 5.74  | 0.0000011        | 195.14 | 1.819743         | 5.74  | 0.0037271       | 1.72   | 0.0000000       | 0.00 | 1.615264        | 0.10 | 0.0003276        | 11.21 | 0.0049924        | 195.14 | 133.7471        | 0.04 | 0.0011692        | 5.81  | 517.206         | 0.02 | 5.9033          | 1.71   | 0.0000000       | 0.00 | 0.0811845       | 9.65 |
| 20F23115              | 17.0 % | ✓               | 0.0013293 | 24.51  | 0.0000000       | 0.00 | 0.0007642        | 11.19 | 0.0000000        | 0.00   | 0.977498         | 11.19 | 0.0002506       | 24.51  | 0.0000000       | 0.00 | 1.253908        | 0.10 | 0.0001759        | 14.76 | 0.0000000        | 0.00   | 103.8261        | 0.04 | 0.0006280        | 11.23 | 402.278         | 0.03 | 0.3969          | 24.51  | 0.0000000       | 0.00 | 0.0630224       | 9.65 |
| 20F23116              | 17.0 % | ✓               | 0.0114091 | 3.42   | 0.0000000       | 0.00 | 0.0006812        | 4.48  | 0.0000000        | 0.00   | 2.520106         | 4.48  | 0.0021506       | 3.42   | 0.0000000       | 0.00 | 2.961457        | 0.10 | 0.0004536        | 10.62 | 0.0000000        | 0.00   | 245.2146        | 0.04 | 0.0016192        | 4.57  | 950.644         | 0.01 | 3.4063          | 3.42   | 0.0000000       | 0.00 | 0.1488453       | 9.65 |
| 20F23118              | 17.0 % |                 | 1.7976114 | 0.19   | 0.0000000       | 0.00 | 0.0006113        | 4.93  | 0.0000062        | 36.95  | 2.261438         | 4.92  | 0.3388498       | 0.25   | 0.0000000       | 0.00 | 1.914912        | 0.10 | 0.0004071        | 10.82 | 0.0289825        | 36.96  | 158.5586        | 0.04 | 0.0014530        | 5.01  | 611.336         | 0.19 | 536.6949        | 0.22   | 0.0000000       | 0.00 | 0.0962451       | 9.65 |
| 20F23119              | 17.0 % | ✓               | 0.0202096 | 1.80   | 0.0000000       | 0.00 | 0.0006406        | 4.86  | 0.0000042        | 55.44  | 2.370143         | 4.86  | 0.0038095       | 1.80   | 0.0000000       | 0.00 | 2.298281        | 0.10 | 0.0004266        | 10.79 | 0.0197928        | 55.45  | 190.3023        | 0.04 | 0.0015228        | 4.95  | 736.771         | 0.02 | 6.0338          | 1.80   | 0.0000000       | 0.00 | 0.1155135       | 9.65 |
| 20F23121              | 17.0 % | ✓               | 0.0061454 | 5.08   | 0.0000000       | 0.00 | 0.0004276        | 6.72  | 0.0000000        | 0.00   | 1.581968         | 6.72  | 0.0011584       | 5.09   | 0.0000000       | 0.00 | 1.883702        | 0.10 | 0.0002848        | 11.74 | 0.0000000        | 0.00   | 155.9744        | 0.04 | 0.0010164        | 6.78  | 603.033         | 0.02 | 1.8348          | 5.09   | 0.0000000       | 0.00 | 0.0946764       | 9.65 |
| 20F23122              | 17.0 % | ✓               | 0.0083466 | 3.33   | 0.0000000       | 0.00 | 0.0004071        | 7.22  | 0.0000000        | 0.00   | 1.506002         | 7.21  | 0.0015733       | 3.33   | 0.0000000       | 0.00 | 1.617749        | 0.10 | 0.0002711        | 12.03 | 0.0000000        | 0.00   | 133.9528        | 0.04 | 0.0009676        | 7.27  | 518.708         | 0.02 | 2.4920          | 3.33   | 0.0000000       | 0.00 | 0.0813094       | 9.65 |
| 20F23124              | 17.0 % | ✓               | 0.0049738 | 6.56   | 0.0000000       | 0.00 | 0.0005163        | 5.79  | 0.0000015        | 154.96 | 1.909986         | 5.79  | 0.0009376       | 6.56   | 0.0000000       | 0.00 | 2.028864        | 0.10 | 0.0003438        | 11.23 | 0.0068449        | 154.97 | 167.9941        | 0.04 | 0.0012272        | 5.86  | 650.833         | 0.02 | 1.4850          | 6.56   | 0.0000000       | 0.00 | 0.1019724       | 9.65 |
| 20F23125              | 17.0 % | ✓               | 0.0018654 | 16.91  | 0.0000000       | 0.00 | 0.0002857        | 10.87 | 0.0000002        | 926.24 | 1.056935         | 10.87 | 0.0003516       | 16.91  | 0.0000000       | 0.00 | 1.170203        | 0.10 | 0.0001902        | 14.52 | 0.0010160        | 926.24 | 96.8952         | 0.04 | 0.0006791        | 10.91 | 375.107         | 0.03 | 0.5569          | 16.91  | 0.0000000       | 0.00 | 0.0588154       | 9.65 |
| 20F23127              | 17.0 % | ✓               | 0.0191060 | 1.89   | 0.0000000       | 0.00 | 0.0004850        | 6.34  | 0.0000000        | 0.00   | 1.794390         | 6.34  | 0.0036015       | 1.90   | 0.0000000       | 0.00 | 1.814269        | 0.10 | 0.0003230        | 11.53 | 0.0000000        | 0.00   | 150.2251        | 0.04 | 0.0011529        | 6.40  | 582.278         | 0.02 | 5.7043          | 1.89   | 0.0000000       | 0.00 | 0.0911867       | 9.65 |
| 20F23128              | 17.0 % | ✓               | 0.0122970 | 2.94   | 0.0000000       | 0.00 | 0.0007089        | 4.39  | 0.0000000        | 0.00   | 2.622478         | 4.38  | 0.0023180       | 2.94   | 0.0000000       | 0.00 | 2.936260        | 0.10 | 0.0004720        | 10.58 | 0.0000000        | 0.00   | 243.1283        | 0.04 | 0.0016849        | 4.48  | 942.199         | 0.01 | 3.6714          | 2.94   | 0.0000000       | 0.00 | 0.1475789       | 9.65 |
| 20F23130              | 17.0 % | ✓               | 0.0170299 | 2.07   | 0.0000000       | 0.00 | 0.0003311        | 8.89  | 0.0000006        | 369.74 | 1.224939         | 8.89  | 0.0032101       | 2.08   | 0.0000000       | 0.00 | 1.282647        | 0.10 | 0.0002205        | 13.11 | 0.0027181        | 369.75 | 106.2058        | 0.04 | 0.0007870        | 8.94  | 411.714         | 0.03 | 5.0844          | 2.07   | 0.0000000       | 0.00 | 0.0644669       | 9.65 |
| 20F23131              | 17.0 % | ✓               | 0.0000701 | 390.24 | 0.0000000       | 0.00 | 0.0005094        | 5.42  | 0.0000004        | 572.16 | 1.884485         | 5.42  | 0.0000132       | 390.24 | 0.0000000       | 0.00 | 1.673104        | 0.10 | 0.0003392        | 11.05 | 0.0018477        | 572.16 | 138.5364        | 0.04 | 0.0012108        | 5.50  | 537.241         | 0.02 | 0.0209          | 390.24 | 0.0000000       | 0.00 | 0.0840916       | 9.65 |
| 20F23133              | 17.0 % | ✓               | 0.0098116 | 3.31   | 0.0000000       | 0.00 | 0.0002750        | 11.40 | 0.0000000        | 0.00   | 1.017429         | 11.40 | 0.0018495       | 3.31   | 0.0000000       | 0.00 | 1.238931        | 0.10 | 0.0001831        | 14.92 | 0.0000000        | 0.00   | 102.5860        | 0.04 | 0.0006537        | 11.43 | 397.167         | 0.03 | 2.9293          | 3.31   | 0.0000000       | 0.00 | 0.0622697       | 9.65 |
| 20F23134              | 17.0 % | ✓               | 0.0275071 | 1.54   | 0.0000000       | 0.00 | 0.0006027        | 4.82  | 0.0000009        | 276.35 | 2.229740         | 4.82  | 0.0051851       | 1.55   | 0.0000000       | 0.00 | 2.296405        | 0.10 | 0.0004014        | 10.77 | 0.0040619        | 276.35 | 190.1469        | 0.04 | 0.0014326        | 4.90  | 736.702         | 0.02 | 8.2125          | 1.55   | 0.0000000       | 0.00 | 0.1154192       | 9.65 |
| 20F23136              | 17.0 % | ✓               | 0.0071173 | 4.29   | 0.0000000       | 0.00 | 0.0003949        | 7.67  | 0.0000003        | 608.62 | 1.460846         | 7.67  | 0.0013416       | 4.30   | 0.0000000       | 0.00 | 1.593040        | 0.10 | 0.0002630        | 12.31 | 0.0016186        | 608.62 | 131.9069        | 0.04 | 0.0009386        | 7.72  | 511.147         | 0.02 | 2.1249          | 4.29   | 0.0000000       | 0.00 | 0.0800675       | 9.65 |
| 20F23137              | 17.0 % | ✓               | 0.0556255 | 0.88   | 0.0000000       | 0.00 | 0.0008679        | 3.56  | 0.0000000        | 0.00   | 3.210784         | 3.55  | 0.0104854       | 0.89   | 0.0000000       | 0.00 | 3.189483        | 0.10 | 0.0005779        | 10.26 | 0.000            |        |                 |      |                  |       |                 |      |                 |        |                 |      |                 |      |

| Additional Parameters |        |   | 40Ar/39Ar | 1σ       | 37Ar/39Ar | 1σ       | 36Ar/39Ar | 1σ       | Time (days) | 37Ar (decay) | 39Ar (decay) | 40Ar (moles) |
|-----------------------|--------|---|-----------|----------|-----------|----------|-----------|----------|-------------|--------------|--------------|--------------|
| 20F23094              | 17.0 % | ✓ | 3.927101  | 0.001549 | 0.009912  | 0.000249 | 0.000168  | 0.000001 | 131.329     | 13.416452    | 1.00092797   | 6.419E-11    |
| 20F23095              | 17.0 % | ✓ | 3.928222  | 0.001555 | 0.017756  | 0.000309 | 0.000173  | 0.000001 | 131.335     | 13.418108    | 1.00092802   | 5.241E-11    |
| 20F23097              | 17.0 % | ✓ | 3.931294  | 0.001554 | 0.011140  | 0.000305 | 0.000190  | 0.000001 | 131.347     | 13.421237    | 1.00092810   | 5.146E-11    |
| 20F23098              | 17.0 % | ✓ | 3.946400  | 0.001576 | 0.011775  | 0.000360 | 0.000232  | 0.000002 | 131.353     | 13.422894    | 1.00092814   | 4.107E-11    |
| 20F23100              | 17.0 % | ✓ | 3.904168  | 0.001559 | 0.009146  | 0.000396 | 0.000117  | 0.000001 | 131.365     | 13.426025    | 1.00092823   | 3.631E-11    |
| 20F23101              | 17.0 % | ✓ | 3.901970  | 0.001536 | 0.010210  | 0.000249 | 0.000086  | 0.000001 | 131.371     | 13.427498    | 1.00092827   | 6.026E-11    |
| 20F23103              | 17.0 % | ✓ | 4.860163  | 0.001941 | 0.009872  | 0.000449 | 0.003322  | 0.000008 | 131.383     | 13.430814    | 1.00092835   | 4.363E-11    |
| 20F23104              | 17.0 % | ✓ | 3.903568  | 0.001581 | 0.012317  | 0.000645 | 0.000134  | 0.000002 | 131.389     | 13.432287    | 1.00092839   | 2.493E-11    |
| 20F23106              | 17.0 % | ✓ | 3.881679  | 0.001573 | 0.010040  | 0.000576 | 0.000025  | 0.000002 | 131.401     | 13.435420    | 1.00092848   | 2.688E-11    |
| 20F23107              | 17.0 % | ✓ | 3.972777  | 0.001572 | 0.010734  | 0.000330 | 0.000324  | 0.000002 | 131.407     | 13.437079    | 1.00092852   | 4.815E-11    |
| 20F23109              | 17.0 % | ✓ | 3.888071  | 0.001547 | 0.009343  | 0.000331 | 0.000044  | 0.000001 | 131.419     | 13.440212    | 1.00092860   | 4.632E-11    |
| 20F23110              | 17.0 % | ✓ | 3.942024  | 0.001565 | 0.010359  | 0.000382 | 0.000212  | 0.000002 | 131.425     | 13.441872    | 1.00092865   | 4.234E-11    |
| 20F23112              | 17.0 % | ✓ | 3.878591  | 0.001569 | 0.012943  | 0.000632 | 0.000021  | 0.000002 | 131.437     | 13.445006    | 1.00092873   | 2.496E-11    |
| 20F23113              | 17.0 % | ✓ | 3.911756  | 0.001613 | 0.013606  | 0.000781 | 0.000152  | 0.000003 | 131.442     | 13.446482    | 1.00092877   | 1.852E-11    |
| 20F23115              | 17.0 % | ✓ | 3.878948  | 0.001635 | 0.009415  | 0.001053 | 0.000015  | 0.000003 | 131.454     | 13.449618    | 1.00092885   | 1.426E-11    |
| 20F23116              | 17.0 % | ✓ | 3.891258  | 0.001546 | 0.010277  | 0.000461 | 0.000049  | 0.000002 | 131.460     | 13.451278    | 1.00092890   | 3.378E-11    |
| 20F23118              | 17.0 % |   | 7.240959  | 0.002948 | 0.014262  | 0.000702 | 0.011341  | 0.000022 | 131.472     | 13.454415    | 1.00092898   | 4.064E-11    |
| 20F23119              | 17.0 % | ✓ | 3.903865  | 0.001586 | 0.012455  | 0.000605 | 0.000110  | 0.000002 | 131.478     | 13.456076    | 1.00092903   | 2.630E-11    |
| 20F23121              | 17.0 % | ✓ | 3.878575  | 0.001595 | 0.010142  | 0.000682 | 0.000042  | 0.000002 | 131.490     | 13.459214    | 1.00092911   | 2.142E-11    |
| 20F23122              | 17.0 % | ✓ | 3.891500  | 0.001606 | 0.011243  | 0.000811 | 0.000065  | 0.000002 | 131.496     | 13.460691    | 1.00092915   | 1.845E-11    |
| 20F23124              | 17.0 % | ✓ | 3.883564  | 0.001582 | 0.011369  | 0.000658 | 0.000033  | 0.000002 | 131.508     | 13.464015    | 1.00092924   | 2.310E-11    |
| 20F23125              | 17.0 % | ✓ | 3.877597  | 0.001650 | 0.010908  | 0.001186 | 0.000022  | 0.000003 | 131.514     | 13.465493    | 1.00092928   | 1.330E-11    |
| 20F23127              | 17.0 % | ✓ | 3.914582  | 0.001599 | 0.011945  | 0.000757 | 0.000130  | 0.000002 | 131.526     | 13.468633    | 1.00092936   | 2.082E-11    |
| 20F23128              | 17.0 % | ✓ | 3.890997  | 0.001564 | 0.010786  | 0.000473 | 0.000053  | 0.000001 | 131.532     | 13.470296    | 1.00092940   | 3.349E-11    |
| 20F23130              | 17.0 % | ✓ | 3.925018  | 0.001630 | 0.011534  | 0.001026 | 0.000163  | 0.000003 | 131.544     | 13.473437    | 1.00092949   | 1.476E-11    |
| 20F23131              | 17.0 % | ✓ | 3.878399  | 0.001607 | 0.013603  | 0.000737 | 0.000003  | 0.000002 | 131.550     | 13.475101    | 1.00092953   | 1.902E-11    |
| 20F23133              | 17.0 % | ✓ | 3.900692  | 0.001654 | 0.009918  | 0.001130 | 0.000098  | 0.000003 | 131.562     | 13.478243    | 1.00092961   | 1.417E-11    |
| 20F23134              | 17.0 % | ✓ | 3.918149  | 0.001580 | 0.011726  | 0.000565 | 0.000148  | 0.000002 | 131.567     | 13.479722    | 1.00092965   | 2.637E-11    |
| 20F23136              | 17.0 % | ✓ | 3.891749  | 0.001617 | 0.011075  | 0.000849 | 0.000057  | 0.000002 | 131.580     | 13.483051    | 1.00092974   | 1.817E-11    |
| 20F23137              | 17.0 % | ✓ | 3.940074  | 0.001565 | 0.012158  | 0.000432 | 0.000214  | 0.000002 | 131.585     | 13.484530    | 1.00092978   | 3.684E-11    |



| Procedure<br>Blanks |        | 36Ar ± 1σ (SE)<br>[fA] | 37Ar ± 1σ (SE)<br>[fA] | 38Ar ± 1σ (SE)<br>[fA] | 39Ar ± 1σ (SE)<br>[fA] | 40Ar ± 1σ (SE)<br>[fA] |
|---------------------|--------|------------------------|------------------------|------------------------|------------------------|------------------------|
| 20F23094            | 17.0 % | 0.0055835 ±0.0001832   | 0.0177515 ±0.0058280   | 0.0090420 ±0.0056997   | 0.0185922 ±0.0063965   | 1.3180716 ±0.0159731   |
| 20F23095            | 17.0 % | 0.0055835 ±0.0001832   | 0.0177515 ±0.0058280   | 0.0090420 ±0.0056997   | 0.0185922 ±0.0063965   | 1.3180716 ±0.0159731   |
| 20F23097            | 17.0 % | 0.0055118 ±0.0001855   | 0.0172075 ±0.0055553   | 0.0258646 ±0.0066346   | 0.0193315 ±0.0060141   | 1.2538637 ±0.0163726   |
| 20F23098            | 17.0 % | 0.0055118 ±0.0001855   | 0.0172075 ±0.0055553   | 0.0258646 ±0.0066346   | 0.0193315 ±0.0060141   | 1.2538637 ±0.0163726   |
| 20F23100            | 17.0 % | 0.0056606 ±0.0001575   | 0.0174556 ±0.0056472   | 0.0012928 ±0.0071288   | 0.0042017 ±0.0057033   | 1.3436973 ±0.0164411   |
| 20F23101            | 17.0 % | 0.0056606 ±0.0001575   | 0.0174556 ±0.0056472   | 0.0012928 ±0.0071288   | 0.0042017 ±0.0057033   | 1.3436973 ±0.0164411   |
| 20F23103            | 17.0 % | 0.0054718 ±0.0001807   | 0.0143838 ±0.0063463   | 0.0040747 ±0.0066952   | 0.0151647 ±0.0064977   | 1.2582580 ±0.0160883   |
| 20F23104            | 17.0 % | 0.0054718 ±0.0001807   | 0.0143838 ±0.0063463   | 0.0040747 ±0.0066952   | 0.0151647 ±0.0064977   | 1.2582580 ±0.0160883   |
| 20F23106            | 17.0 % | 0.0060966 ±0.0001832   | 0.0158122 ±0.0056449   | 0.0149540 ±0.0070443   | 0.0175900 ±0.0056784   | 1.4512126 ±0.0165181   |
| 20F23107            | 17.0 % | 0.0060966 ±0.0001832   | 0.0158122 ±0.0056449   | 0.0149540 ±0.0070443   | 0.0175900 ±0.0056784   | 1.4512126 ±0.0165181   |
| 20F23109            | 17.0 % | 0.0066243 ±0.0001890   | 0.0092569 ±0.0056754   | 0.0146243 ±0.0068190   | 0.0170324 ±0.0063203   | 1.6838238 ±0.0162640   |
| 20F23110            | 17.0 % | 0.0066243 ±0.0001890   | 0.0092569 ±0.0056754   | 0.0146243 ±0.0068190   | 0.0170324 ±0.0063203   | 1.6838238 ±0.0162640   |
| 20F23112            | 17.0 % | 0.0058018 ±0.0001669   | 0.0207325 ±0.0059706   | 0.0052663 ±0.0058655   | 0.0016764 ±0.0062627   | 1.4459369 ±0.0163464   |
| 20F23113            | 17.0 % | 0.0058018 ±0.0001669   | 0.0207325 ±0.0059706   | 0.0052663 ±0.0058655   | 0.0016764 ±0.0062627   | 1.4459369 ±0.0163464   |
| 20F23115            | 17.0 % | 0.0074447 ±0.0002027   | 0.0113442 ±0.0058487   | 0.0000776 ±0.0060667   | 0.0116670 ±0.0062354   | 1.7683319 ±0.0145563   |
| 20F23116            | 17.0 % | 0.0074447 ±0.0002027   | 0.0113442 ±0.0058487   | 0.0000776 ±0.0060667   | 0.0116670 ±0.0062354   | 1.7683319 ±0.0145563   |
| 20F23118            | 17.0 % | 0.0055118 ±0.0001855   | 0.0172075 ±0.0055553   | 0.0258646 ±0.0066346   | 0.0193315 ±0.0060141   | 1.2538637 ±0.0163726   |
| 20F23119            | 17.0 % | 0.0055118 ±0.0001855   | 0.0172075 ±0.0055553   | 0.0258646 ±0.0066346   | 0.0193315 ±0.0060141   | 1.2538637 ±0.0163726   |
| 20F23121            | 17.0 % | 0.0056606 ±0.0001575   | 0.0174556 ±0.0056472   | 0.0012928 ±0.0071288   | 0.0042017 ±0.0057033   | 1.3436973 ±0.0164411   |
| 20F23122            | 17.0 % | 0.0056606 ±0.0001575   | 0.0174556 ±0.0056472   | 0.0012928 ±0.0071288   | 0.0042017 ±0.0057033   | 1.3436973 ±0.0164411   |
| 20F23124            | 17.0 % | 0.0077611 ±0.0002026   | 0.0161180 ±0.0056662   | 0.0044382 ±0.0066870   | 0.0254343 ±0.0064443   | 2.0096964 ±0.0149974   |
| 20F23125            | 17.0 % | 0.0077611 ±0.0002026   | 0.0161180 ±0.0056662   | 0.0044382 ±0.0066870   | 0.0254343 ±0.0064443   | 2.0096964 ±0.0149974   |
| 20F23127            | 17.0 % | 0.0054718 ±0.0001807   | 0.0143838 ±0.0063463   | 0.0040747 ±0.0066952   | 0.0151647 ±0.0064977   | 1.2582580 ±0.0160883   |
| 20F23128            | 17.0 % | 0.0054718 ±0.0001807   | 0.0143838 ±0.0063463   | 0.0040747 ±0.0066952   | 0.0151647 ±0.0064977   | 1.2582580 ±0.0160883   |
| 20F23130            | 17.0 % | 0.0060966 ±0.0001832   | 0.0158122 ±0.0056449   | 0.0149540 ±0.0070443   | 0.0175900 ±0.0056784   | 1.4512126 ±0.0165181   |
| 20F23131            | 17.0 % | 0.0060966 ±0.0001832   | 0.0158122 ±0.0056449   | 0.0149540 ±0.0070443   | 0.0175900 ±0.0056784   | 1.4512126 ±0.0165181   |
| 20F23133            | 17.0 % | 0.0066243 ±0.0001890   | 0.0092569 ±0.0056754   | 0.0146243 ±0.0068190   | 0.0170324 ±0.0063203   | 1.6838238 ±0.0162640   |
| 20F23134            | 17.0 % | 0.0066243 ±0.0001890   | 0.0092569 ±0.0056754   | 0.0146243 ±0.0068190   | 0.0170324 ±0.0063203   | 1.6838238 ±0.0162640   |
| 20F23136            | 17.0 % | 0.0058018 ±0.0001669   | 0.0207325 ±0.0059706   | 0.0052663 ±0.0058655   | 0.0016764 ±0.0062627   | 1.4459369 ±0.0163464   |
| 20F23137            | 17.0 % | 0.0058018 ±0.0001669   | 0.0207325 ±0.0059706   | 0.0052663 ±0.0058655   | 0.0016764 ±0.0062627   | 1.4459369 ±0.0163464   |

| Intercept Values |        | 36Ar ± 1σ (SE)<br>[fA] | r2     | Regression<br>(type,n) | 37Ar ± 1σ (SE)<br>[fA] | r2     | Regression<br>(type,n) | 38Ar ± 1σ (SE)<br>[fA] | r2     | Regression<br>(type,n) | 39Ar ± 1σ (SE)<br>[fA] | r2     | Regression<br>(type,n) | 40Ar ± 1σ (SE)<br>[fA] | r2     | Regression<br>(type,n) |
|------------------|--------|------------------------|--------|------------------------|------------------------|--------|------------------------|------------------------|--------|------------------------|------------------------|--------|------------------------|------------------------|--------|------------------------|
| 20F23094         | 17.0 % | 0.0825105 ±0.0004977   | 0.9450 | EXP 150 of 150         | 0.3236725 ±0.0061576   | 0.2193 | EXP 150 of 150         | 5.5614360 ±0.0065900   | 0.9870 | EXP 149 of 150         | 461.45106 ±0.02814     | 1.0000 | EXP 150 of 150         | 1814.5719 ±0.0626      | 1.0000 | EXP 150 of 150         |
| 20F23095         | 17.0 % | 0.0702143 ±0.0004481   | 0.9484 | EXP 150 of 150         | 0.4813841 ±0.0061313   | 0.4689 | EXP 150 of 150         | 4.5532178 ±0.0074287   | 0.9754 | EXP 149 of 150         | 376.64060 ±0.02542     | 1.0000 | EXP 150 of 150         | 1481.7217 ±0.0534      | 1.0000 | EXP 150 of 150         |
| 20F23097         | 17.0 % | 0.0750537 ±0.0004739   | 0.9343 | EXP 149 of 150         | 0.2899623 ±0.0062023   | 0.1681 | EXP 150 of 150         | 4.4400416 ±0.0073593   | 0.9753 | EXP 149 of 150         | 369.53608 ±0.02385     | 1.0000 | EXP 149 of 150         | 1454.8647 ±0.0546      | 1.0000 | EXP 150 of 150         |
| 20F23098         | 17.0 % | 0.0729245 ±0.0004448   | 0.9247 | EXP 148 of 150         | 0.2408787 ±0.0055163   | 0.1973 | EXP 150 of 150         | 3.5475516 ±0.0059726   | 0.9740 | EXP 149 of 150         | 293.78310 ±0.02431     | 0.9999 | EXP 150 of 150         | 1161.3068 ±0.0486      | 1.0000 | EXP 150 of 150         |
| 20F23100         | 17.0 % | 0.0360633 ±0.0003395   | 0.9618 | EXP 150 of 150         | 0.1616848 ±0.0052695   | 0.0491 | EXP 150 of 150         | 3.1665867 ±0.0067197   | 0.9574 | EXP 149 of 150         | 262.57987 ±0.02113     | 0.9999 | EXP 150 of 150         | 1027.1409 ±0.0440      | 1.0000 | EXP 150 of 150         |
| 20F23101         | 17.0 % | 0.0428760 ±0.0003891   | 0.9774 | EXP 149 of 150         | 0.3145428 ±0.0056328   | 0.2551 | EXP 147 of 150         | 5.2515862 ±0.0077509   | 0.9793 | EXP 150 of 150         | 435.97193 ±0.02515     | 1.0000 | EXP 149 of 150         | 1703.5682 ±0.0522      | 1.0000 | EXP 147 of 150         |
| 20F23103         | 17.0 % | 0.8383889 ±0.0013589   | 0.9642 | EXP 150 of 150         | 0.1721844 ±0.0055905   | 0.0702 | EXP 150 of 150         | 3.2049805 ±0.0065454   | 0.9604 | EXP 150 of 150         | 253.45548 ±0.02101     | 0.9999 | EXP 150 of 150         | 1233.8099 ±0.0459      | 1.0000 | EXP 150 of 150         |
| 20F23104         | 17.0 % | 0.0294347 ±0.0003438   | 0.9462 | EXP 150 of 150         | 0.1511585 ±0.0058695   | 0.0694 | EXP 150 of 150         | 2.1786813 ±0.0063643   | 0.9234 | EXP 150 of 150         | 180.27325 ±0.01703     | 0.9999 | EXP 150 of 150         | 705.3594 ±0.0377       | 1.0000 | EXP 150 of 150         |
| 20F23106         | 17.0 % | 0.0108353 ±0.0002349   | 0.9809 | EXP 147 of 150         | 0.1304734 ±0.0061814   | 0.0395 | EXP 150 of 150         | 2.3553748 ±0.0068301   | 0.9241 | EXP 150 of 150         | 195.49134 ±0.01837     | 0.9999 | EXP 150 of 150         | 760.7045 ±0.0465       | 1.0000 | EXP 150 of 150         |
| 20F23107         | 17.0 % | 0.1158196 ±0.0005613   | 0.8437 | EXP 150 of 150         | 0.2579156 ±0.0061557   | 0.1444 | EXP 150 of 150         | 4.1627238 ±0.0068356   | 0.9754 | EXP 150 of 150         | 342.17435 ±0.02230     | 1.0000 | EXP 148 of 150         | 1361.6361 ±0.0528      | 1.0000 | EXP 149 of 150         |
| 20F23109         | 17.0 % | 0.0211190 ±0.0003000   | 0.9825 | EXP 148 of 150         | 0.2249005 ±0.0059774   | 0.1279 | EXP 149 of 150         | 4.0471453 ±0.0072003   | 0.9707 | EXP 150 of 150         | 336.34648 ±0.02611     | 0.9999 | EXP 150 of 150         | 1310.1962 ±0.0486      | 1.0000 | EXP 150 of 150         |
| 20F23110         | 17.0 % | 0.0703212 ±0.0004530   | 0.9292 | EXP 149 of 150         | 0.2247467 ±0.0064286   | 0.1320 | EXP 150 of 150         | 3.6316355 ±0.0058393   | 0.9757 | EXP 150 of 150         | 303.19850 ±0.02112     | 1.0000 | EXP 150 of 150         | 1197.5998 ±0.0498      | 1.0000 | EXP 150 of 150         |
| 20F23112         | 17.0 % | 0.0096300 ±0.0002525   | 0.9761 | EXP 148 of 150         | 0.1544318 ±0.0060809   | 0.0551 | EXP 150 of 150         | 2.1661762 ±0.0070366   | 0.9080 | EXP 150 of 150         | 181.68932 ±0.01640     | 0.9999 | EXP 149 of 150         | 706.5905 ±0.0408       | 1.0000 | EXP 150 of 150         |
| 20F23113         | 17.0 % | 0.0258404 ±0.0002868   | 0.9563 | EXP 150 of 150         | 0.1147161 ±0.0049451   | 0.0279 | EXP 149 of 150         | 1.6199770 ±0.0065707   | 0.8723 | EXP 150 of 150         | 133.66413 ±0.01469     | 0.9999 | EXP 149 of 150         | 524.6365 ±0.0351       | 0.9999 | EXP 150 of 150         |
| 20F23115         | 17.0 % | 0.0090203 ±0.0002486   | 0.9622 | EXP 150 of 150         | 0.0613968 ±0.0056522   | 0.0151 | EXP 150 of 150         | 1.2497841 ±0.0064419   | 0.8057 | EXP 150 of 150         | 103.77174 ±0.01366     | 0.9998 | EXP 149 of 150         | 404.5067 ±0.0287       | 0.9999 | EXP 150 of 150         |
| 20F23116         | 17.0 % | 0.0193996 ±0.0003263   | 0.9719 | EXP 149 of 150         | 0.1761676 ±0.0059879   | 0.0759 | EXP 150 of 150         | 2.9189921 ±0.0061378   | 0.9614 | EXP 150 of 150         | 245.07049 ±0.01629     | 1.0000 | EXP 150 of 150         | 955.9677 ±0.0449       | 1.0000 | EXP 149 of 150         |
| 20F23118         | 17.0 % | 1.7836114 ±0.0018978   | 0.9885 | EXP 150 of 150         | 0.1510185 ±0.0061100   | 0.1150 | EXP 149 of 150         | 2.2585975 ±0.0064095   | 0.9275 | EXP 150 of 150         | 158.47761 ±0.01740     | 0.9999 | EXP 150 of 150         | 1149.3807 ±0.0469      | 1.0000 | EXP 149 of 150         |
| 20F23119         | 17.0 % | 0.0261329 ±0.0003039   | 0.9624 | EXP 149 of 150         | 0.1590832 ±0.0064890   | 0.0157 | EXP 150 of 150         | 2.2977786 ±0.0064085   | 0.9334 | EXP 150 of 150         | 190.20102 ±0.01941     | 0.9999 | EXP 150 of 150         | 744.1744 ±0.0389       | 1.0000 | EXP 148 of 150         |
| 20F23121         | 17.0 % | 0.0121600 ±0.0002641   | 0.9677 | EXP 149 of 150         | 0.1001834 ±0.0055154   | 0.0628 | EXP 148 of 150         | 1.8790327 ±0.0064556   | 0.8998 | EXP 149 of 150         | 155.87945 ±0.01741     | 0.9999 | EXP 150 of 150         | 606.3059 ±0.0391       | 0.9999 | EXP 148 of 150         |
| 20F23122         | 17.0 % | 0.0143163 ±0.0002228   | 0.9734 | EXP 146 of 150         | 0.0945221 ±0.0057603   | 0.0154 | EXP 150 of 150         | 1.5999384 ±0.0069652   | 0.8299 | EXP 149 of 150         | 133.87202 ±0.01528     | 0.9999 | EXP 150 of 150         | 522.6250 ±0.0331       | 0.9999 | EXP 150 of 150         |
| 20F23124         | 17.0 % | 0.0131912 ±0.0002491   | 0.9710 | EXP 150 of 150         | 0.1258626 ±0.0059221   | 0.0460 | EXP 150 of 150         | 2.0425980 ±0.0063617   | 0.9174 | EXP 148 of 150         | 167.91284 ±0.01710     | 0.9999 | EXP 149 of 150         | 654.4301 ±0.0375       | 1.0000 | EXP 150 of 150         |
| 20F23125         | 17.0 % | 0.0098884 ±0.0002352   | 0.9617 | EXP 150 of 150         | 0.0624416 ±0.0063811   | 0.0070 | EXP 150 of 150         | 1.1768722 ±0.0059004   | 0.8004 | EXP 148 of 150         | 96.85910 ±0.01321      | 0.9998 | EXP 150 of 150         | 377.7330 ±0.0291       | 0.9999 | EXP 149 of 150         |
| 20F23127         | 17.0 % | 0.0248435 ±0.0003053   | 0.9448 | EXP 150 of 150         | 0.1189581 ±0.0055518   | 0.0632 | EXP 149 of 150         | 1.8032176 ±0.0061209   | 0.9048 | EXP 149 of 150         | 150.14498 ±0.01560     | 0.9999 | EXP 150 of 150         | 589.3315 ±0.0329       | 1.0000 | EXP 150 of 150         |
| 20F23128         | 17.0 % | 0.0183321 ±0.0003055   | 0.9721 | EXP 149 of 150         | 0.1804696 ±0.0056693   | 0.0476 | EXP 149 of 150         | 2.9266909 ±0.0068066   | 0.9519 | EXP 150 of 150         | 242.98897 ±0.02132     | 0.9999 | EXP 150 of 150         | 947.2762 ±0.0466       | 1.0000 | EXP 150 of 150         |
| 20F23130         | 17.0 % | 0.0232638 ±0.0002943   | 0.9209 | EXP 150 of 150         | 0.0751811 ±0.0057870   | 0.0038 | EXP 150 of 150         | 1.2745819 ±0.0063644   | 0.8087 | EXP 150 of 150         | 106.15594 ±0.01215     | 0.9999 | EXP 149 of 150         | 418.3139 ±0.0283       | 0.9999 | EXP 147 of 150         |
| 20F23131         | 17.0 % | 0.0065313 ±0.0001973   | 0.9812 | EXP 147 of 150         | 0.1241575 ±0.0050398   | 0.1070 | EXP 148 of 150         | 1.6612849 ±0.0066055   | 0.8706 | EXP 150 of 150         | 138.46616 ±0.01710     | 0.9999 | EXP 150 of 150         | 538.7552 ±0.0319       | 1.0000 | EXP 150 of 150         |
| 20F23133         | 17.0 % | 0.0165980 ±0.0002572   | 0.9453 | EXP 150 of 150         | 0.0662947 ±0.0064678   | 0.0096 | EXP 150 of 150         | 1.2209470 ±0.0061430   | 0.8007 | EXP 150 of 150         | 102.53773 ±0.01357     | 0.9998 | EXP 150 of 150         | 401.8426 ±0.0323       | 0.9999 | EXP 150 of 150         |
| 20F23134         | 17.0 % | 0.0344203 ±0.0003711   | 0.9279 | EXP 150 of 150         | 0.1562997 ±0.0055666   | 0.0612 | EXP 149 of 150         | 2.2927526 ±0.0066700   | 0.9277 | EXP 149 of 150         | 190.04324 ±0.01630     | 0.9999 | EXP 150 of 150         | 746.7135 ±0.0428       | 1.0000 | EXP 149 of 150         |
| 20F23136         | 17.0 % | 0.0132302 ±0.0002497   | 0.9651 | EXP 149 of 150         | 0.0877075 ±0.0057722   | 0.0143 | EXP 150 of 150         | 1.5919133 ±0.0067705   | 0.8471 | EXP 150 of 150         | 131.82479 ±0.01577     | 0.9999 | EXP 150 of 150         | 514.7983 ±0.0350       | 0.9999 | EXP 150 of 150         |
| 20F23137         | 17.0 % | 0.0616627 ±0.0004429   | 0.9167 | EXP 149 of 150         | 0.2175809 ±0.0059277   | 0.1350 | EXP 150 of 150         | 3.1797017 ±0.0066973   | 0.9573 | EXP 148 of 150         | 263.92965 ±0.01828     | 1.0000 | EXP 149 of 150         | 1042.0105 ±0.0447      | 1.0000 | EXP 150 of 150         |

| Project Info |        | Analyst     | Irradiation | X-pos | Y-pos | Z/H-pos | Project                | Experiment | Nmb |
|--------------|--------|-------------|-------------|-------|-------|---------|------------------------|------------|-----|
| 20F23094     | 17.0 % | Dan Miggins | 20-OSU-01   | 0.00  | 0.00  | 43.98   | Oregon\Swenton (20-01) | 20F23090   | 01  |
| 20F23095     | 17.0 % | Dan Miggins | 20-OSU-01   | 0.00  | 0.00  | 43.98   | Oregon\Swenton (20-01) | 20F23090   | 01  |
| 20F23097     | 17.0 % | Dan Miggins | 20-OSU-01   | 0.00  | 0.00  | 43.98   | Oregon\Swenton (20-01) | 20F23090   | 01  |
| 20F23098     | 17.0 % | Dan Miggins | 20-OSU-01   | 0.00  | 0.00  | 43.98   | Oregon\Swenton (20-01) | 20F23090   | 01  |
| 20F23100     | 17.0 % | Dan Miggins | 20-OSU-01   | 0.00  | 0.00  | 43.98   | Oregon\Swenton (20-01) | 20F23090   | 01  |
| 20F23101     | 17.0 % | Dan Miggins | 20-OSU-01   | 0.00  | 0.00  | 43.98   | Oregon\Swenton (20-01) | 20F23090   | 01  |
| 20F23103     | 17.0 % | Dan Miggins | 20-OSU-01   | 0.00  | 0.00  | 43.98   | Oregon\Swenton (20-01) | 20F23090   | 01  |
| 20F23104     | 17.0 % | Dan Miggins | 20-OSU-01   | 0.00  | 0.00  | 43.98   | Oregon\Swenton (20-01) | 20F23090   | 01  |
| 20F23106     | 17.0 % | Dan Miggins | 20-OSU-01   | 0.00  | 0.00  | 43.98   | Oregon\Swenton (20-01) | 20F23090   | 01  |
| 20F23107     | 17.0 % | Dan Miggins | 20-OSU-01   | 0.00  | 0.00  | 43.98   | Oregon\Swenton (20-01) | 20F23090   | 01  |
| 20F23109     | 17.0 % | Dan Miggins | 20-OSU-01   | 0.00  | 0.00  | 43.98   | Oregon\Swenton (20-01) | 20F23090   | 01  |
| 20F23110     | 17.0 % | Dan Miggins | 20-OSU-01   | 0.00  | 0.00  | 43.98   | Oregon\Swenton (20-01) | 20F23090   | 01  |
| 20F23112     | 17.0 % | Dan Miggins | 20-OSU-01   | 0.00  | 0.00  | 43.98   | Oregon\Swenton (20-01) | 20F23090   | 01  |
| 20F23113     | 17.0 % | Dan Miggins | 20-OSU-01   | 0.00  | 0.00  | 43.98   | Oregon\Swenton (20-01) | 20F23090   | 01  |
| 20F23115     | 17.0 % | Dan Miggins | 20-OSU-01   | 0.00  | 0.00  | 43.98   | Oregon\Swenton (20-01) | 20F23090   | 01  |
| 20F23116     | 17.0 % | Dan Miggins | 20-OSU-01   | 0.00  | 0.00  | 43.98   | Oregon\Swenton (20-01) | 20F23090   | 01  |
| 20F23118     | 17.0 % | Dan Miggins | 20-OSU-01   | 0.00  | 0.00  | 43.98   | Oregon\Swenton (20-01) | 20F23090   | 01  |
| 20F23119     | 17.0 % | Dan Miggins | 20-OSU-01   | 0.00  | 0.00  | 43.98   | Oregon\Swenton (20-01) | 20F23090   | 01  |
| 20F23121     | 17.0 % | Dan Miggins | 20-OSU-01   | 0.00  | 0.00  | 43.98   | Oregon\Swenton (20-01) | 20F23090   | 01  |
| 20F23122     | 17.0 % | Dan Miggins | 20-OSU-01   | 0.00  | 0.00  | 43.98   | Oregon\Swenton (20-01) | 20F23090   | 01  |
| 20F23124     | 17.0 % | Dan Miggins | 20-OSU-01   | 0.00  | 0.00  | 43.98   | Oregon\Swenton (20-01) | 20F23090   | 01  |
| 20F23125     | 17.0 % | Dan Miggins | 20-OSU-01   | 0.00  | 0.00  | 43.98   | Oregon\Swenton (20-01) | 20F23090   | 01  |
| 20F23127     | 17.0 % | Dan Miggins | 20-OSU-01   | 0.00  | 0.00  | 43.98   | Oregon\Swenton (20-01) | 20F23090   | 01  |
| 20F23128     | 17.0 % | Dan Miggins | 20-OSU-01   | 0.00  | 0.00  | 43.98   | Oregon\Swenton (20-01) | 20F23090   | 01  |
| 20F23130     | 17.0 % | Dan Miggins | 20-OSU-01   | 0.00  | 0.00  | 43.98   | Oregon\Swenton (20-01) | 20F23090   | 01  |
| 20F23131     | 17.0 % | Dan Miggins | 20-OSU-01   | 0.00  | 0.00  | 43.98   | Oregon\Swenton (20-01) | 20F23090   | 01  |
| 20F23133     | 17.0 % | Dan Miggins | 20-OSU-01   | 0.00  | 0.00  | 43.98   | Oregon\Swenton (20-01) | 20F23090   | 01  |
| 20F23134     | 17.0 % | Dan Miggins | 20-OSU-01   | 0.00  | 0.00  | 43.98   | Oregon\Swenton (20-01) | 20F23090   | 01  |
| 20F23136     | 17.0 % | Dan Miggins | 20-OSU-01   | 0.00  | 0.00  | 43.98   | Oregon\Swenton (20-01) | 20F23090   | 01  |
| 20F23137     | 17.0 % | Dan Miggins | 20-OSU-01   | 0.00  | 0.00  | 43.98   | Oregon\Swenton (20-01) | 20F23090   | 01  |

OSU Argon Geochronology Lab  
CEOAS Oregon State University, Corvallis, USA

| Sample Parameters |        | Sample   | Material | Location      | Standard Name    | Standard (in Ma) | %1σ   | Standard Reference  | Standard 40Ar/39Ar | %1σ   | J          | %1σ   | Air 40Ar/36Ar | %1σ   | MDF (lin) | %1σ   | Volume Ratio | Sensitivity (mol/volt) | Day | Month | Year | Hour | Min | Resist |
|-------------------|--------|----------|----------|---------------|------------------|------------------|-------|---------------------|--------------------|-------|------------|-------|---------------|-------|-----------|-------|--------------|------------------------|-----|-------|------|------|-----|--------|
| 20F23094          | 17.0 % | VS19-104 | Sanidine | Rhyolite Dome | FCT-NM (1C35-20) | 28.201           | 0.082 | Kuiper et al (2008) | 9.57019            | 0.155 | 0.00162228 | 0.155 | 298.218       | 0.115 | 1.0002871 | 0.039 | 1            | 3.54E-14               | 25  | AUG   | 2020 | 22   | 25  | 1      |
| 20F23095          | 17.0 % | VS19-104 | Sanidine | Rhyolite Dome | FCT-NM (1C35-20) | 28.201           | 0.082 | Kuiper et al (2008) | 9.57019            | 0.155 | 0.00162228 | 0.155 | 298.218       | 0.115 | 1.0002871 | 0.039 | 1            | 3.54E-14               | 25  | AUG   | 2020 | 22   | 34  | 1      |
| 20F23097          | 17.0 % | VS19-104 | Sanidine | Rhyolite Dome | FCT-NM (1C35-20) | 28.201           | 0.082 | Kuiper et al (2008) | 9.57019            | 0.155 | 0.00162228 | 0.155 | 298.218       | 0.115 | 1.0002871 | 0.039 | 1            | 3.54E-14               | 25  | AUG   | 2020 | 22   | 51  | 1      |
| 20F23098          | 17.0 % | VS19-104 | Sanidine | Rhyolite Dome | FCT-NM (1C35-20) | 28.201           | 0.082 | Kuiper et al (2008) | 9.57019            | 0.155 | 0.00162228 | 0.155 | 298.218       | 0.115 | 1.0002871 | 0.039 | 1            | 3.54E-14               | 25  | AUG   | 2020 | 23   | 0   | 1      |
| 20F23100          | 17.0 % | VS19-104 | Sanidine | Rhyolite Dome | FCT-NM (1C35-20) | 28.201           | 0.082 | Kuiper et al (2008) | 9.57019            | 0.155 | 0.00162228 | 0.155 | 298.218       | 0.115 | 1.0002871 | 0.039 | 1            | 3.54E-14               | 25  | AUG   | 2020 | 23   | 17  | 1      |
| 20F23101          | 17.0 % | VS19-104 | Sanidine | Rhyolite Dome | FCT-NM (1C35-20) | 28.201           | 0.082 | Kuiper et al (2008) | 9.57019            | 0.155 | 0.00162228 | 0.155 | 298.218       | 0.115 | 1.0002871 | 0.039 | 1            | 3.54E-14               | 25  | AUG   | 2020 | 23   | 25  | 1      |
| 20F23103          | 17.0 % | VS19-104 | Sanidine | Rhyolite Dome | FCT-NM (1C35-20) | 28.201           | 0.082 | Kuiper et al (2008) | 9.57019            | 0.155 | 0.00162228 | 0.155 | 298.218       | 0.115 | 1.0002871 | 0.039 | 1            | 3.54E-14               | 25  | AUG   | 2020 | 23   | 43  | 1      |
| 20F23104          | 17.0 % | VS19-104 | Sanidine | Rhyolite Dome | FCT-NM (1C35-20) | 28.201           | 0.082 | Kuiper et al (2008) | 9.57019            | 0.155 | 0.00162228 | 0.155 | 298.218       | 0.115 | 1.0002871 | 0.039 | 1            | 3.54E-14               | 25  | AUG   | 2020 | 23   | 51  | 1      |
| 20F23106          | 17.0 % | VS19-104 | Sanidine | Rhyolite Dome | FCT-NM (1C35-20) | 28.201           | 0.082 | Kuiper et al (2008) | 9.57019            | 0.155 | 0.00162228 | 0.155 | 298.218       | 0.115 | 1.0002871 | 0.039 | 1            | 3.54E-14               | 26  | AUG   | 2020 | 0    | 8   | 1      |
| 20F23107          | 17.0 % | VS19-104 | Sanidine | Rhyolite Dome | FCT-NM (1C35-20) | 28.201           | 0.082 | Kuiper et al (2008) | 9.57019            | 0.155 | 0.00162228 | 0.155 | 298.218       | 0.115 | 1.0002871 | 0.039 | 1            | 3.54E-14               | 26  | AUG   | 2020 | 0    | 17  | 1      |
| 20F23109          | 17.0 % | VS19-104 | Sanidine | Rhyolite Dome | FCT-NM (1C35-20) | 28.201           | 0.082 | Kuiper et al (2008) | 9.57019            | 0.155 | 0.00162228 | 0.155 | 298.218       | 0.115 | 1.0002871 | 0.039 | 1            | 3.54E-14               | 26  | AUG   | 2020 | 0    | 34  | 1      |
| 20F23110          | 17.0 % | VS19-104 | Sanidine | Rhyolite Dome | FCT-NM (1C35-20) | 28.201           | 0.082 | Kuiper et al (2008) | 9.57019            | 0.155 | 0.00162228 | 0.155 | 298.218       | 0.115 | 1.0002871 | 0.039 | 1            | 3.54E-14               | 26  | AUG   | 2020 | 0    | 43  | 1      |
| 20F23112          | 17.0 % | VS19-104 | Sanidine | Rhyolite Dome | FCT-NM (1C35-20) | 28.201           | 0.082 | Kuiper et al (2008) | 9.57019            | 0.155 | 0.00162228 | 0.155 | 298.218       | 0.115 | 1.0002871 | 0.039 | 1            | 3.54E-14               | 26  | AUG   | 2020 | 1    | 0   | 1      |
| 20F23113          | 17.0 % | VS19-104 | Sanidine | Rhyolite Dome | FCT-NM (1C35-20) | 28.201           | 0.082 | Kuiper et al (2008) | 9.57019            | 0.155 | 0.00162228 | 0.155 | 298.218       | 0.115 | 1.0002871 | 0.039 | 1            | 3.54E-14               | 26  | AUG   | 2020 | 1    | 8   | 1      |
| 20F23115          | 17.0 % | VS19-104 | Sanidine | Rhyolite Dome | FCT-NM (1C35-20) | 28.201           | 0.082 | Kuiper et al (2008) | 9.57019            | 0.155 | 0.00162228 | 0.155 | 298.218       | 0.115 | 1.0002871 | 0.039 | 1            | 3.54E-14               | 26  | AUG   | 2020 | 1    | 25  | 1      |
| 20F23116          | 17.0 % | VS19-104 | Sanidine | Rhyolite Dome | FCT-NM (1C35-20) | 28.201           | 0.082 | Kuiper et al (2008) | 9.57019            | 0.155 | 0.00162228 | 0.155 | 298.218       | 0.115 | 1.0002871 | 0.039 | 1            | 3.54E-14               | 26  | AUG   | 2020 | 1    | 34  | 1      |
| 20F23118          | 17.0 % | VS19-104 | Sanidine | Rhyolite Dome | FCT-NM (1C35-20) | 28.201           | 0.082 | Kuiper et al (2008) | 9.57019            | 0.155 | 0.00162228 | 0.155 | 298.218       | 0.115 | 1.0002871 | 0.039 | 1            | 3.54E-14               | 26  | AUG   | 2020 | 1    | 51  | 1      |
| 20F23119          | 17.0 % | VS19-104 | Sanidine | Rhyolite Dome | FCT-NM (1C35-20) | 28.201           | 0.082 | Kuiper et al (2008) | 9.57019            | 0.155 | 0.00162228 | 0.155 | 298.218       | 0.115 | 1.0002871 | 0.039 | 1            | 3.54E-14               | 26  | AUG   | 2020 | 2    | 0   | 1      |
| 20F23121          | 17.0 % | VS19-104 | Sanidine | Rhyolite Dome | FCT-NM (1C35-20) | 28.201           | 0.082 | Kuiper et al (2008) | 9.57019            | 0.155 | 0.00162228 | 0.155 | 298.218       | 0.115 | 1.0002871 | 0.039 | 1            | 3.54E-14               | 26  | AUG   | 2020 | 2    | 17  | 1      |
| 20F23122          | 17.0 % | VS19-104 | Sanidine | Rhyolite Dome | FCT-NM (1C35-20) | 28.201           | 0.082 | Kuiper et al (2008) | 9.57019            | 0.155 | 0.00162228 | 0.155 | 298.218       | 0.115 | 1.0002871 | 0.039 | 1            | 3.54E-14               | 26  | AUG   | 2020 | 2    | 25  | 1      |
| 20F23124          | 17.0 % | VS19-104 | Sanidine | Rhyolite Dome | FCT-NM (1C35-20) | 28.201           | 0.082 | Kuiper et al (2008) | 9.57019            | 0.155 | 0.00162228 | 0.155 | 298.218       | 0.115 | 1.0002871 | 0.039 | 1            | 3.54E-14               | 26  | AUG   | 2020 | 2    | 43  | 1      |
| 20F23125          | 17.0 % | VS19-104 | Sanidine | Rhyolite Dome | FCT-NM (1C35-20) | 28.201           | 0.082 | Kuiper et al (2008) | 9.57019            | 0.155 | 0.00162228 | 0.155 | 298.218       | 0.115 | 1.0002871 | 0.039 | 1            | 3.54E-14               | 26  | AUG   | 2020 | 2    | 51  | 1      |
| 20F23127          | 17.0 % | VS19-104 | Sanidine | Rhyolite Dome | FCT-NM (1C35-20) | 28.201           | 0.082 | Kuiper et al (2008) | 9.57019            | 0.155 | 0.00162228 | 0.155 | 298.218       | 0.115 | 1.0002871 | 0.039 | 1            | 3.54E-14               | 26  | AUG   | 2020 | 3    | 8   | 1      |
| 20F23128          | 17.0 % | VS19-104 | Sanidine | Rhyolite Dome | FCT-NM (1C35-20) | 28.201           | 0.082 | Kuiper et al (2008) | 9.57019            | 0.155 | 0.00162228 | 0.155 | 298.218       | 0.115 | 1.0002871 | 0.039 | 1            | 3.54E-14               | 26  | AUG   | 2020 | 3    | 17  | 1      |
| 20F23130          | 17.0 % | VS19-104 | Sanidine | Rhyolite Dome | FCT-NM (1C35-20) | 28.201           | 0.082 | Kuiper et al (2008) | 9.57019            | 0.155 | 0.00162228 | 0.155 | 298.218       | 0.115 | 1.0002871 | 0.039 | 1            | 3.54E-14               | 26  | AUG   | 2020 | 3    | 34  | 1      |
| 20F23131          | 17.0 % | VS19-104 | Sanidine | Rhyolite Dome | FCT-NM (1C35-20) | 28.201           | 0.082 | Kuiper et al (2008) | 9.57019            | 0.155 | 0.00162228 | 0.155 | 298.218       | 0.115 | 1.0002871 | 0.039 | 1            | 3.54E-14               | 26  | AUG   | 2020 | 3    | 43  | 1      |
| 20F23133          | 17.0 % | VS19-104 | Sanidine | Rhyolite Dome | FCT-NM (1C35-20) | 28.201           | 0.082 | Kuiper et al (2008) | 9.57019            | 0.155 | 0.00162228 | 0.155 | 298.218       | 0.115 | 1.0002871 | 0.039 | 1            | 3.54E-14               | 26  | AUG   | 2020 | 4    | 0   | 1      |
| 20F23134          | 17.0 % | VS19-104 | Sanidine | Rhyolite Dome | FCT-NM (1C35-20) | 28.201           | 0.082 | Kuiper et al (2008) | 9.57019            | 0.155 | 0.00162228 | 0.155 | 298.218       | 0.115 | 1.0002871 | 0.039 | 1            | 3.54E-14               | 26  | AUG   | 2020 | 4    | 8   | 1      |
| 20F23136          | 17.0 % | VS19-104 | Sanidine | Rhyolite Dome | FCT-NM (1C35-20) | 28.201           | 0.082 | Kuiper et al (2008) | 9.57019            | 0.155 | 0.00162228 | 0.155 | 298.218       | 0.115 | 1.0002871 | 0.039 | 1            | 3.54E-14               | 26  | AUG   | 2020 | 4    | 26  | 1      |
| 20F23137          | 17.0 % | VS19-104 | Sanidine | Rhyolite Dome | FCT-NM (1C35-20) | 28.201           | 0.082 | Kuiper et al (2008) | 9.57019            | 0.155 | 0.00162228 | 0.155 | 298.218       | 0.115 | 1.0002871 | 0.039 | 1            | 3.54E-14               | 26  | AUG   | 2020 | 4    | 34  | 1      |



20F23090.AGE >>> VS19-1

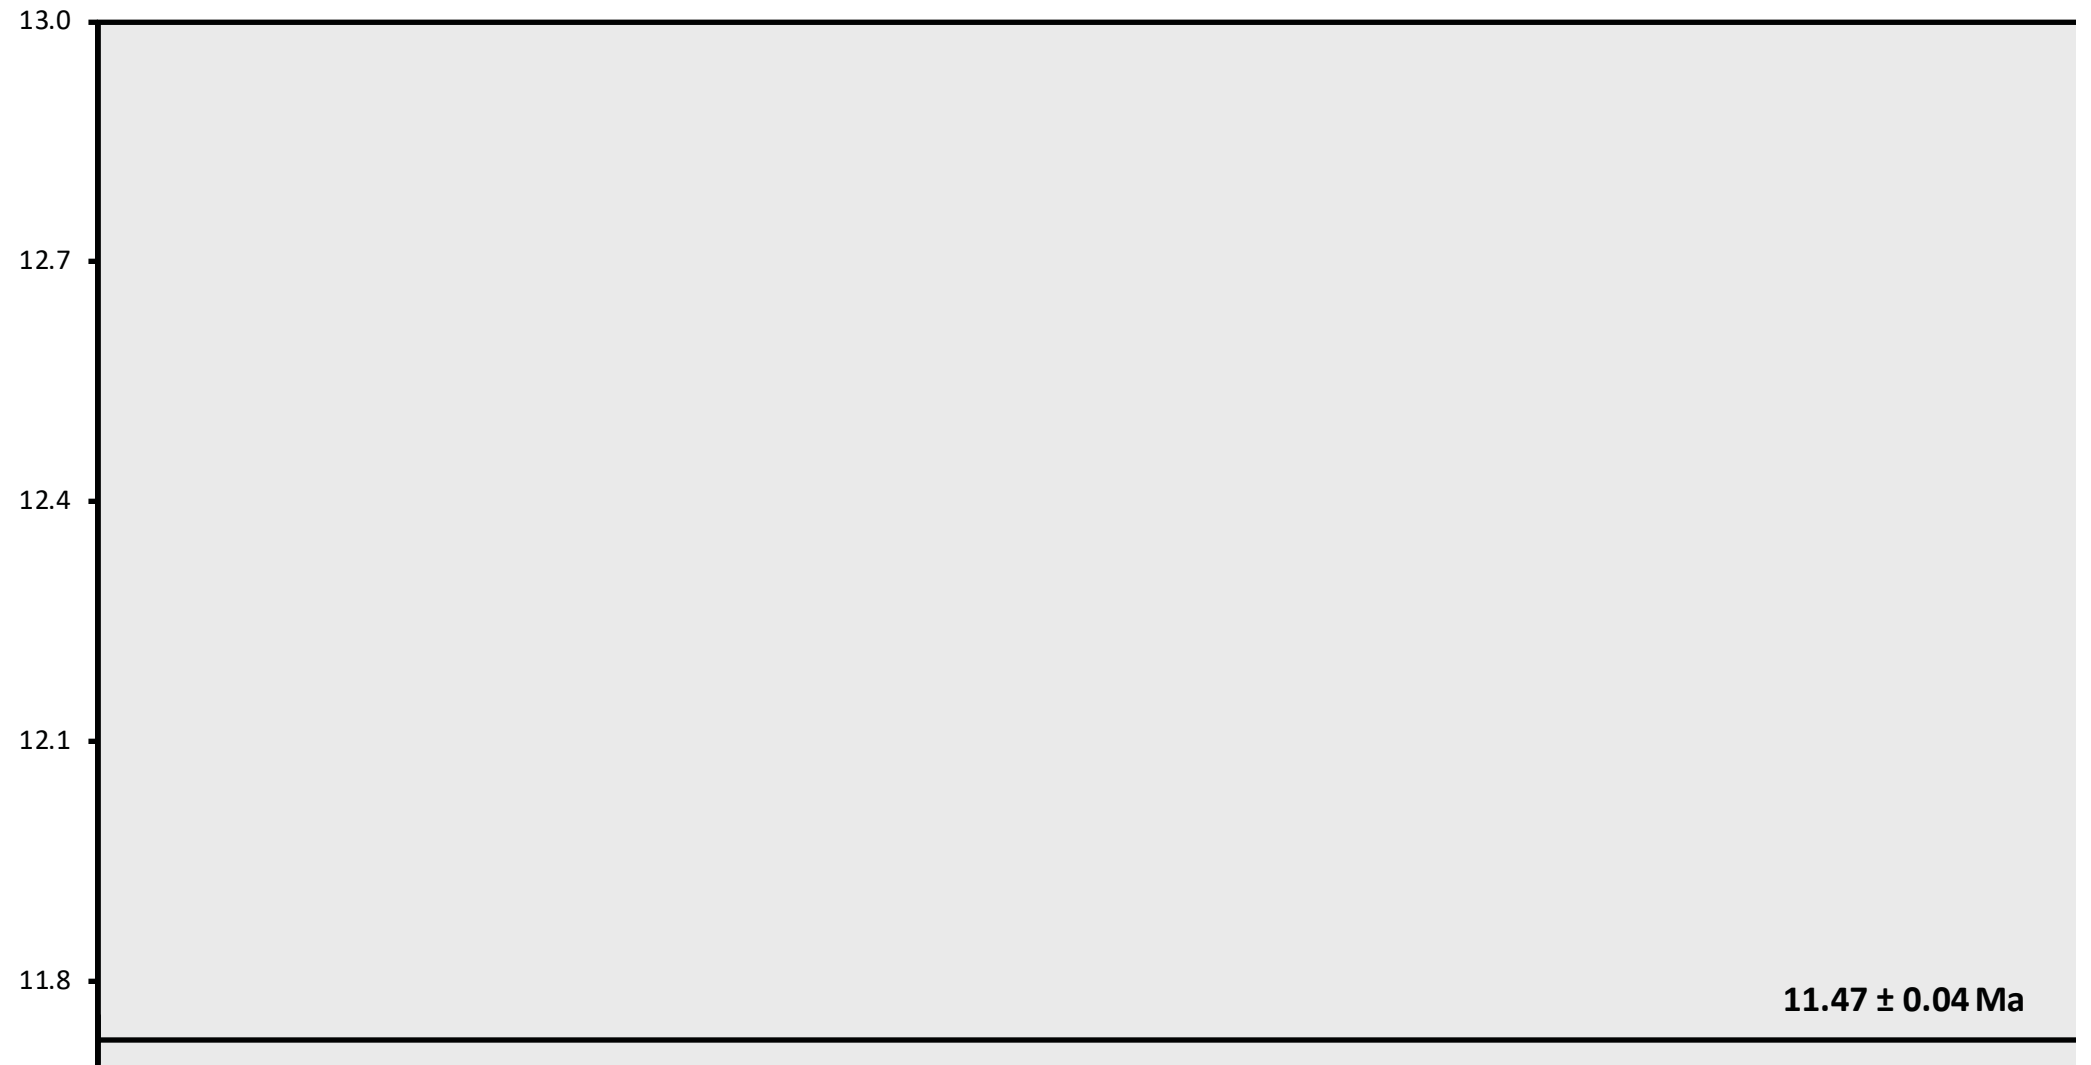

20F23090.AGE >>> VS19-104 >>> OREGON | SWENTON (20-01) PROJECT

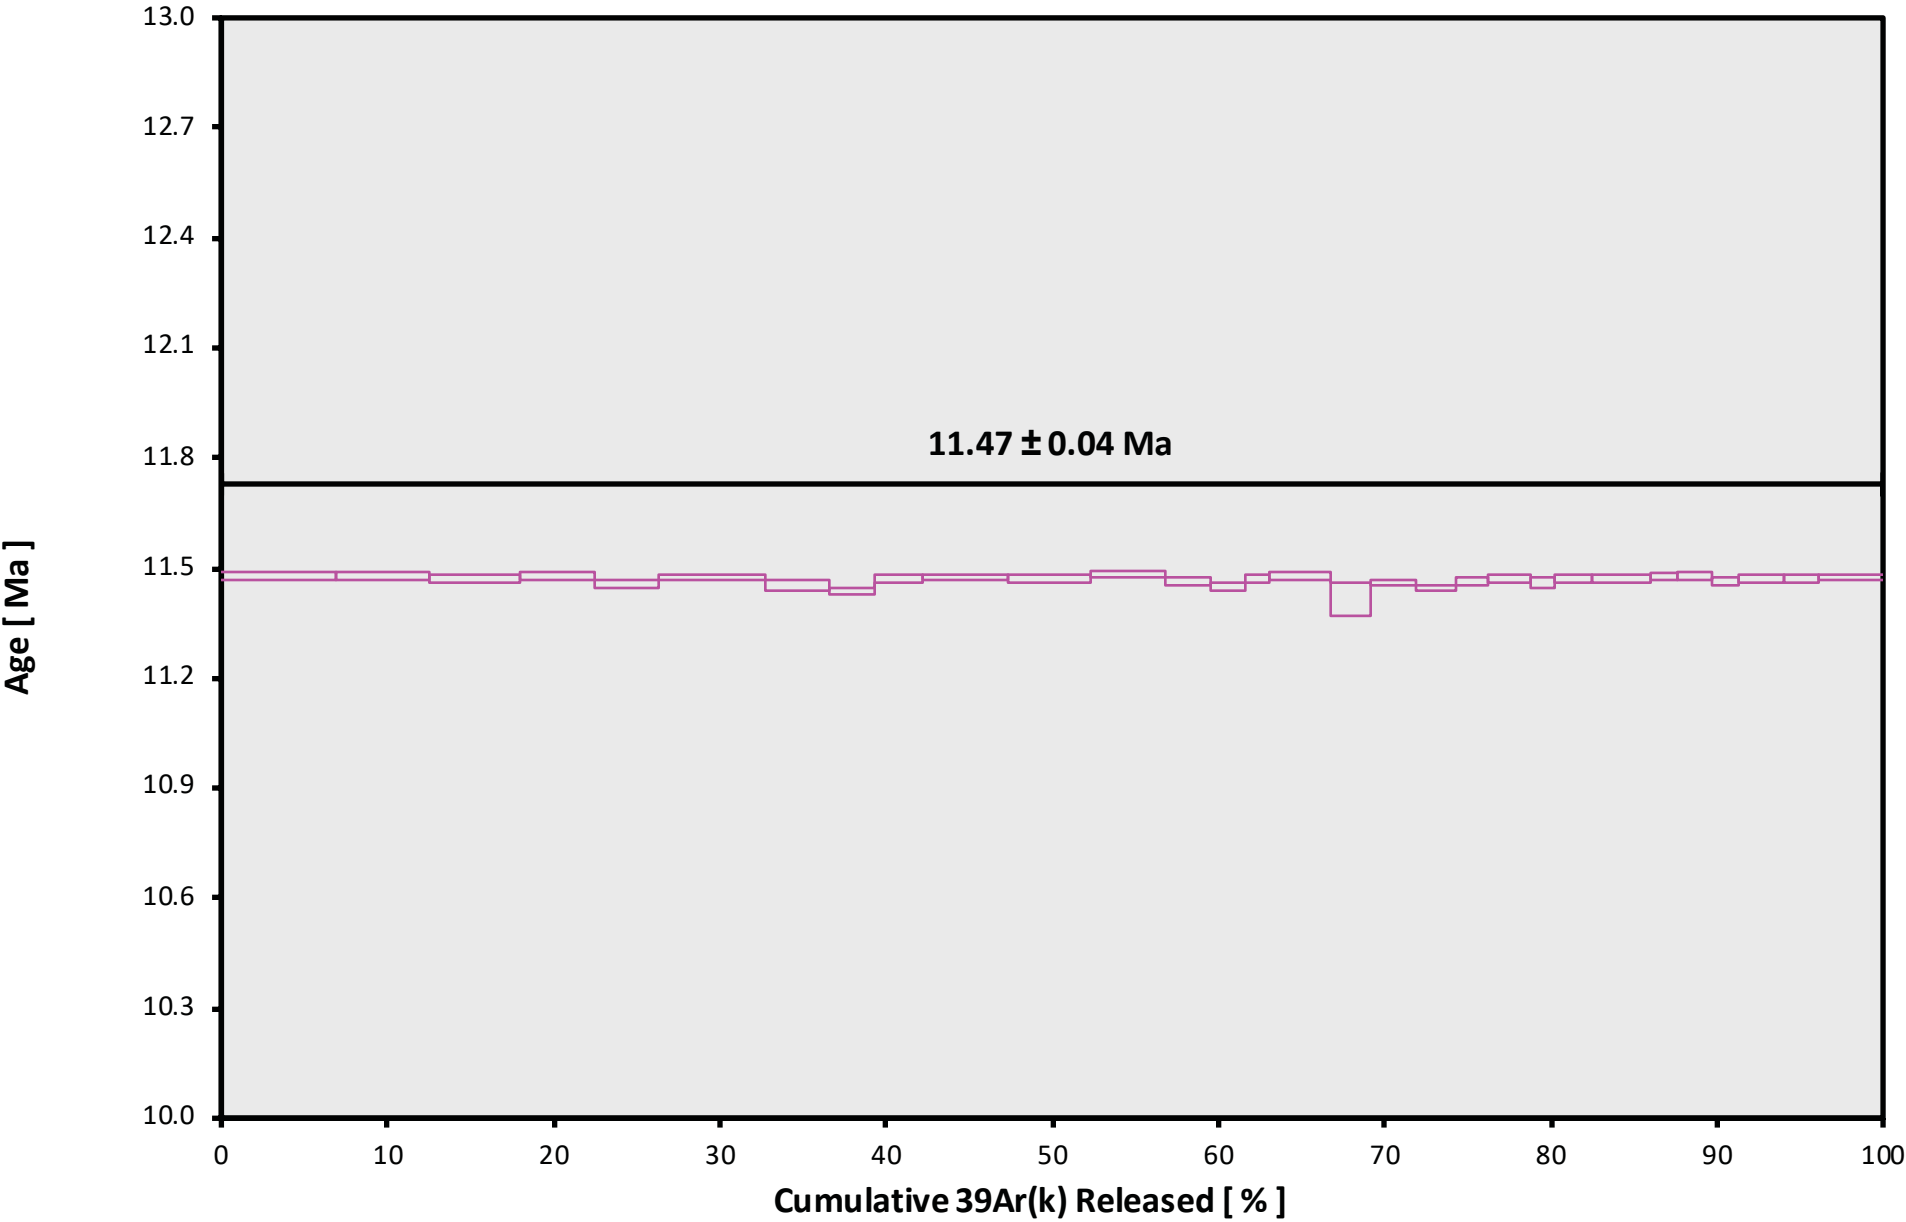

Ar-Ages in Ma

**WEIGHTED PLATEAU**  
**11.47  $\pm$  0.04**

**TOTAL FUSION**  
**11.47  $\pm$  0.04**

**NORMAL ISOCHRON**  
**11.48  $\pm$  0.04**

**INVERSE ISOCHRON**  
**11.47  $\pm$  0.04**

**MSWD (PROBABILITY)**  
**4.77 (0%)**

Sample Info

**Sanidine**  
**Rhyolite Dome**  
**Dan Miggins**

**IRR = 20-OSU-01 (1C35-20)**  
**J = 0.00162228  $\pm$  0.00000251**

20F23090.AGE >>> VS19-104 >>> OREGON | SWENTON (20-01) PROJECT

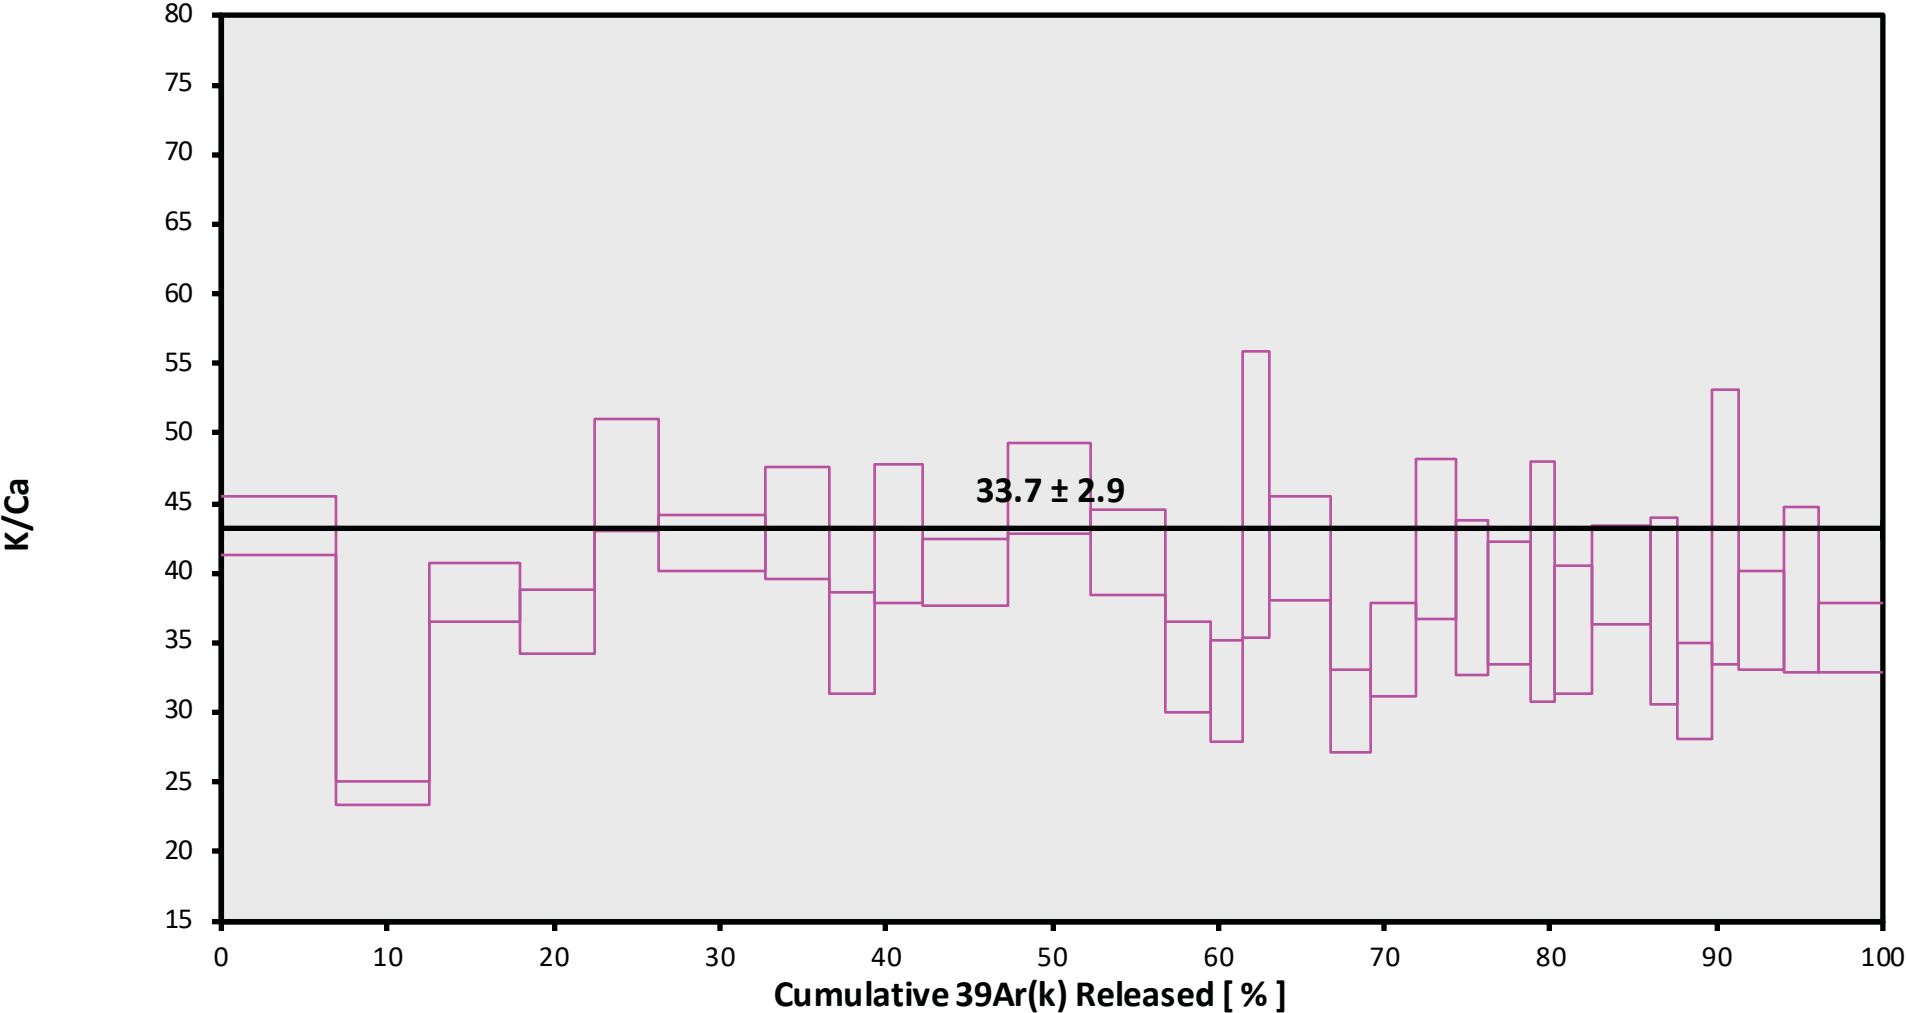

Ar-Ages in Ma

WEIGHTED PLATEAU  
 $11.47 \pm 0.04$   
TOTAL FUSION  
 $11.47 \pm 0.04$   
NORMAL ISOCHRON  
 $11.48 \pm 0.04$   
INVERSE ISOCHRON  
 $11.47 \pm 0.04$

Sample Info

Sanidine  
Rhyolite Dome  
Dan Miggins



20F23090.AGE >>> VS19-104 >>> OREGON | SWENTON (20-01) PROJECT

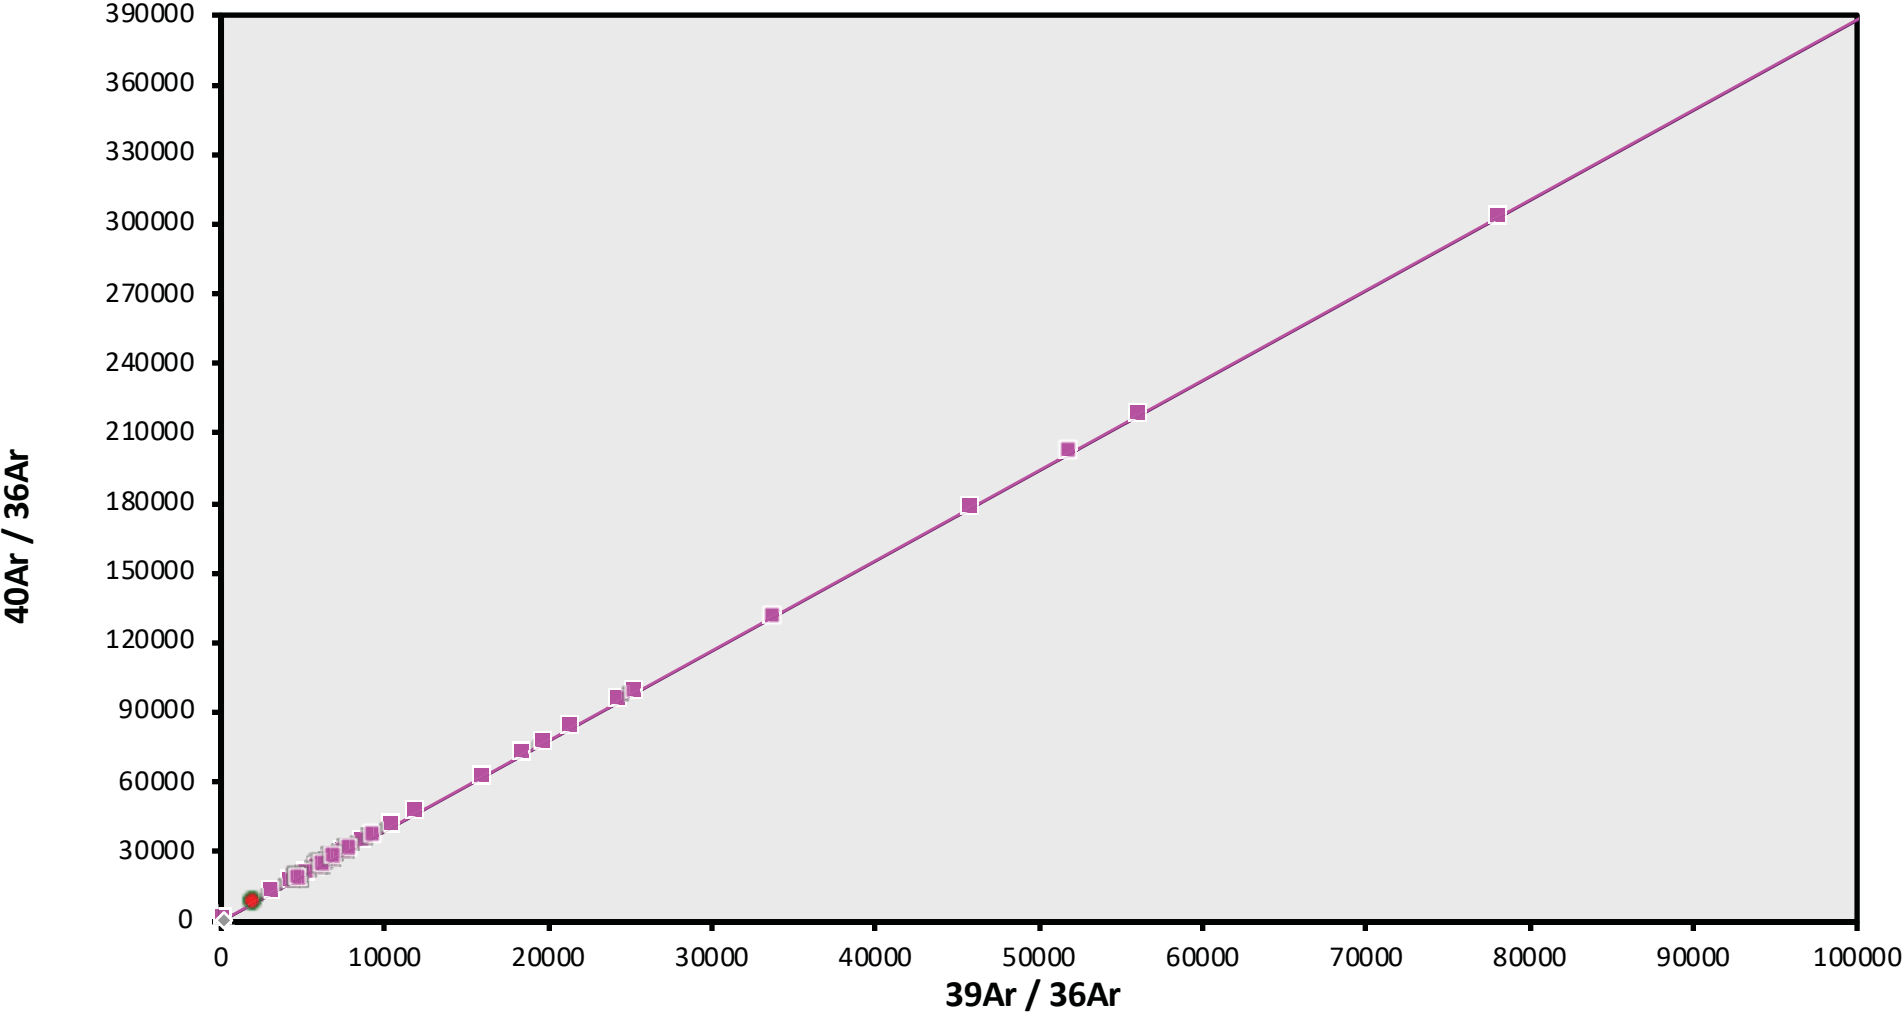

Ar-Ages in Ma

**WEIGHTED PLATEAU**  
 **$11.47 \pm 0.04$**   
**TOTAL FUSION**  
 **$11.47 \pm 0.04$**   
**NORMAL ISOCHRON**  
 **$11.48 \pm 0.04$**   
**INVERSE ISOCHRON**  
 **$11.47 \pm 0.04$**

**MSWD (PROBABILITY)**  
**10.21 (0%)**

Sample Info

Sanidine  
Rhyolite Dome  
Dan Miggins

20F23090.AGE >>> VS19-104 >>> OREGON | SWENTON (20-01) PROJECT

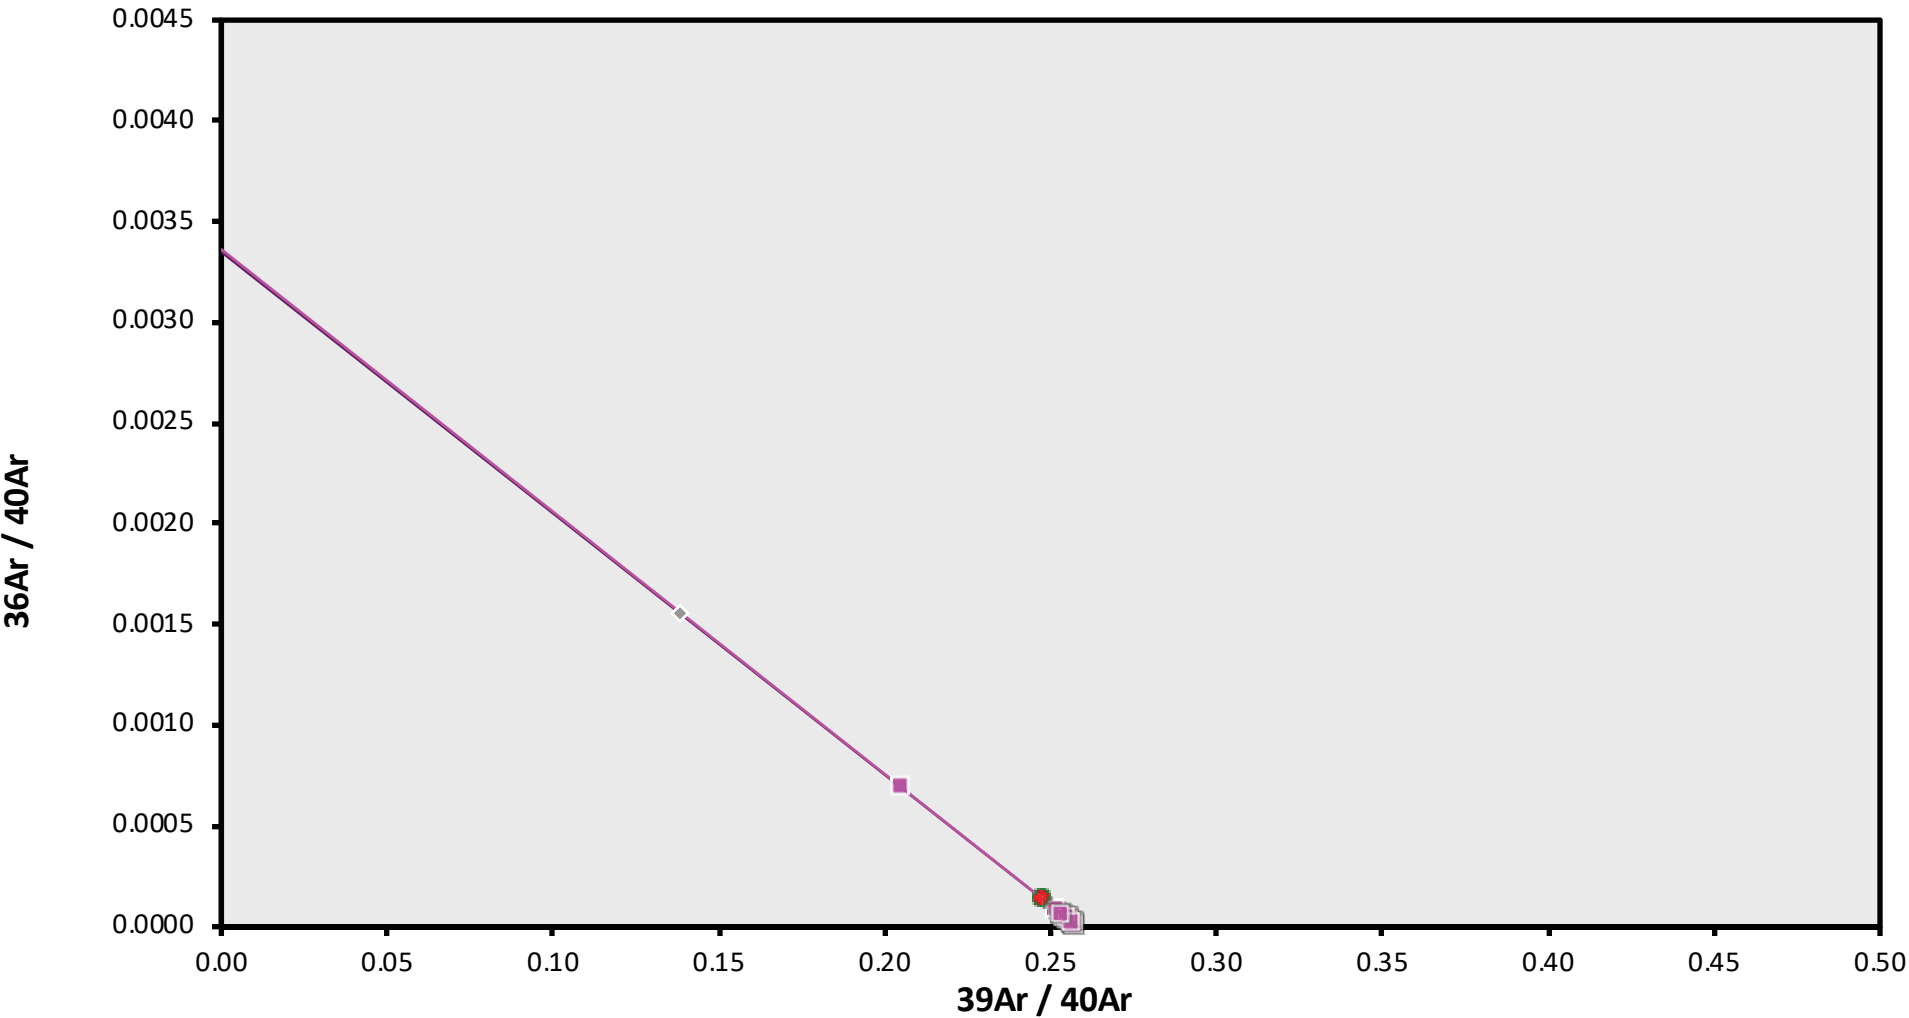

Ar-Ages in Ma

WEIGHTED PLATEAU  
 $11.47 \pm 0.04$   
TOTAL FUSION  
 $11.47 \pm 0.04$   
NORMAL ISOCHRON  
 $11.48 \pm 0.04$   
INVERSE ISOCHRON  
 $11.47 \pm 0.04$

MSWD (PROBABILITY)  
4.89 (0%)

Sample Info

Sanidine  
Rhyolite Dome  
Dan Miggins

| Relative Abundances |        |   | 36Ar<br>[fA] | %1σ    | 37Ar<br>[fA] | %1σ   | 38Ar<br>[fA] | %1σ   | 39Ar<br>[fA] | %1σ   | 40Ar<br>[fA] | %1σ   | 40(r)/39(k) ± 2σ | Age ± 2σ<br>(Ma) | 40Ar(r)<br>(%) | 39Ar(k)<br>(%) | K/Ca ± 2σ |
|---------------------|--------|---|--------------|--------|--------------|-------|--------------|-------|--------------|-------|--------------|-------|------------------|------------------|----------------|----------------|-----------|
| 20F23165            | 17.0 % | ✓ | 0.0767796    | 0.716  | 7.640362     | 1.509 | 7.398923     | 0.152 | 613.4413     | 0.040 | 2402.956     | 0.003 | 3.88023 ±0.00314 | 11.46 ±0.01      | 99.06          | 8.50           | 34.5 ±1.0 |
| 20F23166            | 17.0 % | ✓ | 0.0039248    | 8.685  | 4.963005     | 2.261 | 4.364411     | 0.238 | 360.8331     | 0.040 | 1398.480     | 0.004 | 3.87299 ±0.00315 | 11.44 ±0.01      | 99.93          | 5.00           | 31.3 ±1.4 |
| 20F23168            | 17.0 % | ✓ | 0.0135916    | 2.485  | 2.231934     | 4.532 | 2.002979     | 0.491 | 166.2921     | 0.041 | 648.643      | 0.006 | 3.87673 ±0.00342 | 11.45 ±0.01      | 99.39          | 2.30           | 32.0 ±2.9 |
| 20F23169            | 17.0 % | ✓ | 0.0102108    | 3.315  | 4.264474     | 2.282 | 3.360213     | 0.282 | 280.4190     | 0.040 | 1089.562     | 0.005 | 3.87527 ±0.00321 | 11.45 ±0.01      | 99.74          | 3.89           | 28.3 ±1.3 |
| 20F23171            | 17.0 % | ✓ | 0.0283416    | 1.644  | 8.696311     | 1.434 | 7.841836     | 0.144 | 654.1777     | 0.040 | 2546.988     | 0.003 | 3.88098 ±0.00311 | 11.47 ±0.01      | 99.68          | 9.07           | 32.3 ±0.9 |
| 20F23172            | 17.0 % | ✓ | 0.0060657    | 5.511  | 4.212345     | 2.776 | 4.326467     | 0.234 | 361.2038     | 0.040 | 1402.656     | 0.004 | 3.87863 ±0.00315 | 11.46 ±0.01      | 99.88          | 5.01           | 36.9 ±2.0 |
| 20F23174            | 17.0 % | ✓ | 0.0023257    | 13.399 | 2.263033     | 4.779 | 2.291673     | 0.386 | 189.8257     | 0.041 | 736.722      | 0.006 | 3.87777 ±0.00333 | 11.46 ±0.01      | 99.91          | 2.63           | 36.1 ±3.4 |
| 20F23175            | 17.0 % | ✓ | 0.0087310    | 4.075  | 3.567495     | 3.058 | 3.328590     | 0.283 | 277.0051     | 0.040 | 1076.733     | 0.004 | 3.87810 ±0.00323 | 11.46 ±0.01      | 99.77          | 3.84           | 33.4 ±2.0 |
| 20F23177            | 17.0 % | ✓ | 0.0057224    | 5.939  | 1.767901     | 6.399 | 2.041799     | 0.440 | 169.2536     | 0.041 | 657.088      | 0.006 | 3.87244 ±0.00340 | 11.44 ±0.01      | 99.75          | 2.35           | 41.2 ±5.3 |
| 20F23178            | 17.0 % | ✓ | 0.0693653    | 0.738  | 2.372091     | 4.786 | 2.256965     | 0.439 | 185.4696     | 0.041 | 739.688      | 0.006 | 3.87699 ±0.00360 | 11.45 ±0.01      | 97.21          | 2.57           | 33.6 ±3.2 |
| 20F23180            | 17.0 % | ✓ | 0.0082561    | 4.373  | 2.060290     | 5.534 | 2.346891     | 0.371 | 195.7705     | 0.041 | 761.741      | 0.007 | 3.87867 ±0.00340 | 11.46 ±0.01      | 99.68          | 2.71           | 40.9 ±4.5 |
| 20F23181            | 17.0 % | ✓ | 0.0991277    | 0.581  | 2.755693     | 3.910 | 2.081280     | 0.439 | 171.3254     | 0.041 | 693.073      | 0.006 | 3.87335 ±0.00378 | 11.44 ±0.01      | 95.75          | 2.37           | 26.7 ±2.1 |
| 20F23183            | 17.0 % | ✓ | 0.0017008    | 18.470 | 2.336398     | 4.602 | 2.363532     | 0.393 | 197.0016     | 0.040 | 764.459      | 0.005 | 3.87827 ±0.00331 | 11.46 ±0.01      | 99.94          | 2.73           | 36.3 ±3.3 |
| 20F23184            | 17.0 % | ✓ | 0.0025318    | 12.558 | 2.250552     | 4.761 | 2.350792     | 0.364 | 196.2388     | 0.040 | 761.894      | 0.006 | 3.87898 ±0.00332 | 11.46 ±0.01      | 99.91          | 2.72           | 37.5 ±3.6 |
| 20F23186            | 17.0 % | ✓ | 0.0016060    | 17.683 | 1.215580     | 9.236 | 1.204918     | 0.799 | 99.2133      | 0.042 | 384.559      | 0.008 | 3.87167 ±0.00373 | 11.44 ±0.01      | 99.89          | 1.38           | 35.1 ±6.5 |
| 20F23187            | 17.0 % |   | 0.0008565    | 35.231 | 2.315389     | 4.915 | 2.250425     | 0.438 | 185.8658     | 0.040 | 722.466      | 0.006 | 3.88609 ±0.00333 | 11.48 ±0.01      | 99.97          | 2.58           | 34.5 ±3.4 |
| 20F23189            | 17.0 % | ✓ | 0.0045542    | 7.674  | 4.076470     | 2.681 | 3.546873     | 0.277 | 294.7000     | 0.040 | 1145.109     | 0.004 | 3.88161 ±0.00320 | 11.47 ±0.01      | 99.89          | 4.08           | 31.1 ±1.7 |
| 20F23190            | 17.0 % | ✓ | 0.0022958    | 15.788 | 4.424435     | 2.411 | 4.705870     | 0.230 | 391.7638     | 0.040 | 1521.082     | 0.004 | 3.88123 ±0.00315 | 11.47 ±0.01      | 99.96          | 5.43           | 38.1 ±1.8 |
| 20F23192            | 17.0 % | ✓ | 0.0035625    | 8.014  | 2.078651     | 5.612 | 2.044111     | 0.464 | 168.1653     | 0.041 | 651.318      | 0.006 | 3.86718 ±0.00337 | 11.43 ±0.01      | 99.85          | 2.33           | 34.8 ±3.9 |
| 20F23193            | 17.0 % | ✓ | 0.0034936    | 8.632  | 2.442491     | 4.989 | 2.336682     | 0.407 | 193.4333     | 0.041 | 749.666      | 0.005 | 3.87063 ±0.00332 | 11.44 ±0.01      | 99.87          | 2.68           | 34.1 ±3.4 |
| 20F23195            | 17.0 % | ✓ | 0.0070195    | 4.647  | 4.787033     | 2.375 | 3.673426     | 0.286 | 304.9290     | 0.040 | 1182.482     | 0.004 | 3.87172 ±0.00318 | 11.44 ±0.01      | 99.84          | 4.23           | 27.4 ±1.3 |
| 20F23196            | 17.0 % | ✓ | 0.0384140    | 1.145  | 3.135946     | 3.793 | 2.979064     | 0.338 | 245.5265     | 0.040 | 962.206      | 0.006 | 3.87270 ±0.00334 | 11.44 ±0.01      | 98.82          | 3.40           | 33.7 ±2.6 |
| 20F23198            | 17.0 % | ✓ | 0.0125107    | 2.975  | 1.965464     | 5.361 | 2.050970     | 0.470 | 169.6030     | 0.040 | 661.827      | 0.006 | 3.88055 ±0.00343 | 11.46 ±0.01      | 99.44          | 2.35           | 37.1 ±4.0 |
| 20F23199            | 17.0 % | ✓ | 0.0022788    | 13.848 | 1.613983     | 7.046 | 1.760396     | 0.535 | 146.3581     | 0.041 | 567.882      | 0.007 | 3.87575 ±0.00347 | 11.45 ±0.01      | 99.89          | 2.03           | 39.0 ±5.5 |
| 20F23201            | 17.0 % | ✓ | 0.0037925    | 7.866  | 2.072707     | 5.224 | 2.122492     | 0.426 | 175.5977     | 0.041 | 681.359      | 0.006 | 3.87415 ±0.00333 | 11.45 ±0.01      | 99.84          | 2.43           | 36.4 ±3.8 |
| 20F23202            | 17.0 % | ✓ | 0.0055065    | 5.740  | 1.769622     | 6.472 | 1.797673     | 0.521 | 150.6859     | 0.041 | 585.334      | 0.006 | 3.87393 ±0.00343 | 11.45 ±0.01      | 99.73          | 2.09           | 36.6 ±4.7 |
| 20F23204            | 17.0 % | ✓ | 0.0100667    | 3.203  | 1.732631     | 6.036 | 1.524081     | 0.571 | 126.9810     | 0.041 | 495.329      | 0.007 | 3.87767 ±0.00360 | 11.46 ±0.01      | 99.41          | 1.76           | 31.5 ±3.8 |
| 20F23205            | 17.0 % | ✓ | 0.0028906    | 9.686  | 2.043582     | 5.099 | 1.661529     | 0.557 | 138.1197     | 0.041 | 536.679      | 0.008 | 3.87998 ±0.00345 | 11.46 ±0.01      | 99.85          | 1.91           | 29.1 ±3.0 |
| 20F23207            | 17.0 % |   | 0.0313253    | 1.227  | 2.068036     | 5.258 | 1.826832     | 0.511 | 150.8836     | 0.041 | 589.125      | 0.007 | 3.84305 ±0.00354 | 11.35 ±0.01      | 98.43          | 2.09           | 31.4 ±3.3 |
| 20F23208            | 17.0 % | ✓ | 0.0043081    | 7.794  | 3.404704     | 3.231 | 3.046301     | 0.298 | 254.4150     | 0.040 | 986.597      | 0.005 | 3.87336 ±0.00322 | 11.44 ±0.01      | 99.88          | 3.53           | 32.1 ±2.1 |
| Σ                   |        |   | 0.4711563    | 0.425  | 92.528609    | 0.658 | 86.887993    | 0.061 | 7214.4980    | 0.008 | 28103.704    | 0.001 |                  |                  |                |                |           |

| Information on Analysis and Constants Used in Calculations |  |
|------------------------------------------------------------|--|
| Project = SWENTON (20-01)                                  |  |
| Sample = VS19-106                                          |  |
| Material = Sanidine                                        |  |
| Location = Rhyolite Dome                                   |  |
| Region = Eastern Oregon                                    |  |
| Analyst = Dan Miggins                                      |  |
| Irradiation = 20-OSU-01 (1C36-20)                          |  |
| Position = X: 0   Y: 0   Z/H: 45.11772 mm                  |  |
| FCT-NM Age = 28.201 ±0.023 Ma                              |  |
| FCT-NM Reference = Kuiper et al (2008)                     |  |
| FCT-NM 40Ar/39Ar Ratio = 9.58908 ±0.01477                  |  |
| FCT-NMJ-value = 0.00161908 ±0.00000249                     |  |
| Air Shot 40Ar/36Ar = 298.6900 ±0.3525                      |  |
| Air Shot MDF = 0.99989105 ±0.00039356 (LIN)                |  |
| Experiment Type = Total Fusion                             |  |
| Extraction Method = Single Crystal Laser Heating           |  |
| Heating = 62 sec                                           |  |
| Isolation = 1.62 min                                       |  |
| Instrument = ARGUS-VI-F                                    |  |
| Preferred Age = Ideogram Age                               |  |
| Age Classification = Eruption Age                          |  |
| IGSN = Undefined                                           |  |
| Rock Class = Undefined                                     |  |
| Lithology = Undefined                                      |  |
| Lat-Lon = Undefined - Undefined                            |  |

Age Equations = Min et al. (2000)  
Negative Intensities = Allowed  
Collector Calibrations = 36Ar  
Decay 40K = 5.463 ±0.107 E-10 1/a  
Decay 39Ar = 2.940 ±0.016 E-07 1/h  
Decay 37Ar = 8.230 ±0.012 E-04 1/h  
Decay 36Cl = 2.257 ±0.015 E-06 1/a  
Decay 40K(EC,β<sup>+</sup>) = 0.580 ±0.014 E-10 1/a  
Decay 40K(β<sup>-</sup>) = 4.884 ±0.099 E-10 1/a  
Atmospheric 40/36(a) = 298.56 ±0.31  
Atmospheric 38/36(a) = 0.1885 ±0.0003  
Production 39/37(ca) = 0.0006425 ±0.0000059  
Production 38/37(ca) = 0.0001800 ±0.0000173  
Production 36/37(ca) = 0.0002703 ±0.0000005  
Production 40/39(k) = 0.000607 ±0.000059  
Production 38/39(k) = 0.012077 ±0.000011  
Production 36/38(cl) = 262.80 ±1.71  
Scaling Ratio K/Ca = 0.430  
Abundance Ratio 40K/K = 1.1700 ±0.0100 E-04  
Atomic Weight K = 39.0983 ±0.0001 g

| Results                         | 40(a)/36(a) ± 2σ        | 40(r)/39(k) ± 2σ                        | Age ± 2σ<br>(Ma)      | M<br>SWD          | 39Ar(k)<br>(%,n)                           | K/Ca ± 2σ |
|---------------------------------|-------------------------|-----------------------------------------|-----------------------|-------------------|--------------------------------------------|-----------|
| Age Plateau<br>Error Mean       |                         | 3.87622 ±0.00142<br>±0.04%              | 11.45 ±0.04<br>±0.31% | 5.08<br>0%        | 95.33<br>28                                | 32.4 ±1.3 |
|                                 |                         | Full External Error<br>Analytical Error | ±0.60<br>±0.00        | 1.54<br>2.2542    | 2σ Confidence Limit<br>Error Magnification |           |
| Total Fusion Age                |                         | 3.87641 ±0.00067<br>±0.02%              | 11.45 ±0.04<br>±0.31% |                   | 30                                         | 33.5 ±0.4 |
|                                 |                         | Full External Error<br>Analytical Error | ±0.60<br>±0.00        |                   |                                            |           |
| Normal Isochron<br>Error Chron  | 281.92 ±17.44<br>±6.19% | 3.88019 ±0.00220<br>±0.06%              | 11.46 ±0.04<br>±0.31% | 9.57<br>0%        | 95.33<br>28                                |           |
|                                 |                         | Full External Error<br>Analytical Error | ±0.60<br>±0.01        | 1.55<br>3.0929    | 2σ Confidence Limit<br>Error Magnification |           |
|                                 |                         |                                         |                       | 1<br>0.0000000324 | Number of Iterations<br>Convergence        |           |
| Inverse Isochron<br>Error Chron | 296.70 ±12.95<br>±4.37% | 3.87634 ±0.00164<br>±0.04%              | 11.45 ±0.04<br>±0.31% | 5.26<br>0%        | 95.33<br>28                                |           |
|                                 |                         | Full External Error<br>Analytical Error | ±0.60<br>±0.00        | 1.55<br>2.2931    | 2σ Confidence Limit<br>Error Magnification |           |
|                                 |                         |                                         |                       | 2<br>0.0002169258 | Number of Iterations<br>Convergence        |           |
|                                 |                         |                                         |                       | 4%                | Spreading Factor                           |           |

| Incremental Heating |        |   | 36Ar(a)<br>[fA] | 37Ar(ca)<br>[fA] | 38Ar(cl)<br>[fA] | 39Ar(k)<br>[fA] | 40Ar(r)<br>[fA] | Age ± 2σ<br>(Ma) | 40Ar(r)<br>(%) | 39Ar(k)<br>(%) | K/Ca ± 2σ |
|---------------------|--------|---|-----------------|------------------|------------------|-----------------|-----------------|------------------|----------------|----------------|-----------|
| 20F23165            | 17.0 % | ✓ | 0.0747145       | 7.640362         | 0.0000000        | 613.4364        | 2380.277        | 11.46 ±0.01      | 99.06          | 8.50           | 34.5 ±1.0 |
| 20F23166            | 17.0 % | ✓ | 0.0025822       | 4.963005         | 0.0052890        | 360.8299        | 1397.490        | 11.44 ±0.01      | 99.93          | 5.00           | 31.3 ±1.4 |
| 20F23168            | 17.0 % | ✓ | 0.0129884       | 2.231934         | 0.0000000        | 166.2907        | 644.665         | 11.45 ±0.01      | 99.99          | 2.30           | 32.0 ±2.9 |
| 20F23169            | 17.0 % | ✓ | 0.0090581       | 4.264474         | 0.0000000        | 280.4163        | 1086.688        | 11.45 ±0.01      | 99.74          | 3.89           | 28.3 ±1.3 |
| 20F23171            | 17.0 % | ✓ | 0.0259909       | 8.696311         | 0.0000000        | 654.1721        | 2538.831        | 11.47 ±0.01      | 99.68          | 9.07           | 32.3 ±0.9 |
| 20F23172            | 17.0 % | ✓ | 0.0049271       | 4.212345         | 0.0000000        | 361.2011        | 1400.966        | 11.46 ±0.01      | 99.88          | 5.01           | 36.9 ±2.0 |
| 20F23174            | 17.0 % | ✓ | 0.0017140       | 2.263033         | 0.0000000        | 189.8242        | 736.095         | 11.46 ±0.01      | 99.91          | 2.63           | 36.1 ±3.4 |
| 20F23175            | 17.0 % | ✓ | 0.0077667       | 3.567495         | 0.0000000        | 277.0028        | 1074.246        | 11.46 ±0.01      | 99.77          | 3.84           | 33.4 ±2.0 |
| 20F23177            | 17.0 % | ✓ | 0.0052445       | 1.767901         | 0.0000000        | 169.2524        | 655.419         | 11.44 ±0.01      | 99.75          | 2.35           | 41.2 ±5.3 |
| 20F23178            | 17.0 % | ✓ | 0.0687234       | 2.372091         | 0.0036861        | 185.4680        | 719.057         | 11.45 ±0.01      | 97.21          | 2.57           | 33.6 ±3.2 |
| 20F23180            | 17.0 % | ✓ | 0.0076992       | 2.060290         | 0.0000000        | 195.7692        | 759.324         | 11.46 ±0.01      | 99.68          | 2.71           | 40.9 ±4.5 |
| 20F23181            | 17.0 % | ✓ | 0.0983828       | 2.755693         | 0.0000000        | 171.3236        | 663.596         | 11.44 ±0.01      | 95.75          | 2.37           | 26.7 ±2.1 |
| 20F23183            | 17.0 % | ✓ | 0.0010693       | 2.336398         | 0.0000000        | 197.0001        | 764.020         | 11.46 ±0.01      | 99.94          | 2.73           | 36.3 ±3.3 |
| 20F23184            | 17.0 % | ✓ | 0.0019235       | 2.250552         | 0.0000000        | 196.2373        | 761.201         | 11.46 ±0.01      | 99.91          | 2.72           | 37.5 ±3.6 |
| 20F23186            | 17.0 % | ✓ | 0.0012760       | 1.215580         | 0.0062691        | 99.2125         | 384.118         | 11.44 ±0.01      | 99.89          | 1.38           | 35.1 ±6.5 |
| 20F23187            | 17.0 % |   | 0.0002295       | 2.315389         | 0.0052821        | 185.8643        | 722.285         | 11.48 ±0.01      | 99.97          | 2.58           | 34.5 ±3.4 |
| 20F23189            | 17.0 % | ✓ | 0.0034524       | 4.076470         | 0.0000000        | 294.6974        | 1143.900        | 11.47 ±0.01      | 99.89          | 4.08           | 31.1 ±1.7 |
| 20F23190            | 17.0 % | ✓ | 0.0010999       | 4.424435         | 0.0000000        | 391.7609        | 1520.516        | 11.47 ±0.01      | 99.96          | 5.43           | 38.1 ±1.8 |
| 20F23192            | 17.0 % | ✓ | 0.0029980       | 2.078651         | 0.0122549        | 168.1640        | 650.321         | 11.43 ±0.01      | 99.85          | 2.33           | 34.8 ±3.9 |
| 20F23193            | 17.0 % | ✓ | 0.0028334       | 2.442491         | 0.0000000        | 193.4317        | 748.703         | 11.44 ±0.01      | 99.87          | 2.68           | 34.1 ±3.4 |
| 20F23195            | 17.0 % | ✓ | 0.0057255       | 4.787033         | 0.0000000        | 304.9259        | 1180.587        | 11.44 ±0.01      | 99.84          | 4.23           | 27.4 ±1.3 |
| 20F23196            | 17.0 % | ✓ | 0.0375650       | 3.135946         | 0.0062192        | 245.5245        | 950.842         | 11.44 ±0.01      | 98.82          | 3.40           | 33.7 ±2.6 |
| 20F23198            | 17.0 % | ✓ | 0.0119794       | 1.965464         | 0.0000773        | 169.6018        | 658.148         | 11.46 ±0.01      | 99.44          | 2.35           | 37.1 ±4.0 |
| 20F23199            | 17.0 % | ✓ | 0.0018425       | 1.613983         | 0.0000000        | 146.3570        | 567.243         | 11.45 ±0.01      | 99.89          | 2.03           | 39.0 ±5.5 |
| 20F23201            | 17.0 % | ✓ | 0.0032321       | 2.072707         | 0.0008324        | 175.5964        | 680.287         | 11.45 ±0.01      | 99.84          | 2.43           | 36.4 ±3.8 |
| 20F23202            | 17.0 % | ✓ | 0.0050282       | 1.769622         | 0.0000000        | 150.6847        | 583.741         | 11.45 ±0.01      | 99.73          | 2.09           | 36.6 ±4.7 |
| 20F23204            | 17.0 % | ✓ | 0.0095984       | 1.732631         | 0.0000000        | 126.9799        | 492.387         | 11.46 ±0.01      | 99.41          | 1.76           | 31.5 ±3.8 |
| 20F23205            | 17.0 % | ✓ | 0.0023382       | 2.043582         | 0.0000000        | 138.1183        | 535.897         | 11.46 ±0.01      | 99.85          | 1.91           | 29.1 ±3.0 |
| 20F23207            | 17.0 % |   | 0.0307663       | 2.068036         | 0.0000000        | 150.8822        | 579.848         | 11.35 ±0.01      | 98.43          | 2.09           | 31.4 ±3.3 |
| 20F23208            | 17.0 % | ✓ | 0.0033878       | 3.404704         | 0.0000000        | 254.4128        | 985.432         | 11.44 ±0.01      | 99.88          | 3.53           | 32.1 ±2.1 |
| Σ                   |        |   | 0.4461373       | 92.528609        | 0.0399101        | 7214.4386       | 27966.126       |                  |                |                |           |

| Information on Analysis                                                                                                                                                                                                                                 | Results                   | 40(r)/39(k) ± 2σ          | Age ± 2σ<br>(Ma)                                                                 | MSWD                         | 39Ar(k)<br>(%,n)                                          | K/Ca ± 2σ  |
|---------------------------------------------------------------------------------------------------------------------------------------------------------------------------------------------------------------------------------------------------------|---------------------------|---------------------------|----------------------------------------------------------------------------------|------------------------------|-----------------------------------------------------------|------------|
| Project = SWENTON (20-01)<br>Sample = VS19-106<br>Material = Sanidine<br>Location = Rhyolite Dome<br>Region = Eastern Oregon<br>Analyst = Dan Miggins<br>Irradiation = 20-OSU-01 (1C36-20)<br>J = 0.00161908 ± 0.00000249<br>FCT-NM = 28.201 ± 0.023 Ma | Age Plateau<br>Error Mean | 3.87622 ± 0.00142 ± 0.04% | 11.45 ± 0.04<br>± 0.31%<br>Full External Error ± 0.60<br>Analytical Error ± 0.00 | 5.08<br>0%<br>1.54<br>2.2542 | 95.33<br>28<br>2σ Confidence Limit<br>Error Magnification | 32.4 ± 1.3 |
|                                                                                                                                                                                                                                                         | Total Fusion Age          | 3.87641 ± 0.00067 ± 0.02% | 11.45 ± 0.04<br>± 0.31%<br>Full External Error ± 0.60<br>Analytical Error ± 0.00 |                              | 30                                                        | 33.5 ± 0.4 |

| Normal Isochron |        |   | 39(k)/36(a) ± 2σ      | 40(a+r)/36(a) ± 2σ     | r.i.   |
|-----------------|--------|---|-----------------------|------------------------|--------|
| 20F23165        | 17.0 % | ✓ | 8210.41 ±121.27       | 32156.88 ±474.27       | 0.9985 |
| 20F23166        | 17.0 % | ✓ | 139738.81 ±37040.09   | 541505.42 ±143534.36   | 1.0000 |
| 20F23168        | 17.0 % | ✓ | 12803.06 ±668.08      | 49932.61 ±2605.23      | 0.9999 |
| 20F23169        | 17.0 % | ✓ | 30957.46 ±2320.47     | 120266.97 ±9014.33     | 0.9999 |
| 20F23171        | 17.0 % | ✓ | 25169.23 ±904.75      | 97979.93 ±3521.22      | 0.9998 |
| 20F23172        | 17.0 % | ✓ | 73309.02 ±9991.78     | 284637.15 ±38794.48    | 1.0000 |
| 20F23174        | 17.0 % | ✓ | 110749.42 ±40448.46   | 429759.42 ±156958.50   | 1.0000 |
| 20F23175        | 17.0 % | ✓ | 35665.58 ±3278.68     | 138613.36 ±12742.04    | 1.0000 |
| 20F23177        | 17.0 % | ✓ | 32272.21 ±4199.27     | 125270.64 ±16299.93    | 1.0000 |
| 20F23178        | 17.0 % | ✓ | 2698.76 ±40.35        | 10761.63 ±160.66       | 0.9985 |
| 20F23180        | 17.0 % | ✓ | 25427.17 ±2393.52     | 98922.10 ±9311.43      | 1.0000 |
| 20F23181        | 17.0 % | ✓ | 1741.40 ±20.48        | 7043.60 ±82.63         | 0.9976 |
| 20F23183        | 17.0 % | ✓ | 184230.72 ±108708.72  | 714795.59 ±421777.87   | 1.0000 |
| 20F23184        | 17.0 % | ✓ | 102021.10 ±33866.11   | 396036.38 ±131464.68   | 1.0000 |
| 20F23186        | 17.0 % | ✓ | 77749.96 ±34804.27    | 301320.45 ±134883.92   | 1.0000 |
| 20F23187        | 17.0 % |   | 809700.57 ±2139965.13 | 3146865.56 ±8316879.76 | 1.0000 |
| 20F23189        | 17.0 % | ✓ | 85360.85 ±17343.90    | 331635.80 ±67382.37    | 1.0000 |
| 20F23190        | 17.0 % | ✓ | 356174.01 ±235495.05  | 1382693.23 ±914208.13  | 1.0000 |
| 20F23192        | 17.0 % | ✓ | 56092.45 ±10749.07    | 217218.36 ±41625.45    | 1.0000 |
| 20F23193        | 17.0 % | ✓ | 68267.62 ±14618.35    | 264537.39 ±56645.76    | 1.0000 |
| 20F23195        | 17.0 % | ✓ | 53257.23 ±6095.59     | 206495.56 ±23633.99    | 1.0000 |
| 20F23196        | 17.0 % | ✓ | 6535.98 ±153.58       | 25610.43 ±601.44       | 0.9994 |
| 20F23198        | 17.0 % | ✓ | 14157.77 ±882.28      | 55238.43 ±3442.07      | 0.9999 |
| 20F23199        | 17.0 % | ✓ | 79432.17 ±27336.94    | 308157.54 ±106053.51   | 1.0000 |
| 20F23201        | 17.0 % | ✓ | 54329.68 ±10077.49    | 210780.06 ±39096.75    | 1.0000 |
| 20F23202        | 17.0 % | ✓ | 29968.01 ±3785.62     | 116392.38 ±14702.61    | 1.0000 |
| 20F23204        | 17.0 % | ✓ | 13229.31 ±892.43      | 51597.50 ±3480.45      | 0.9999 |
| 20F23205        | 17.0 % | ✓ | 59069.57 ±14217.70    | 229487.45 ±55235.98    | 1.0000 |
| 20F23207        | 17.0 % |   | 4904.14 ±122.93       | 19145.42 ±479.64       | 0.9994 |
| 20F23208        | 17.0 % | ✓ | 75095.99 ±14943.67    | 291172.11 ±57941.13    | 1.0000 |

| Results         | 40(a)/36(a) ± 2σ      | 40(r)/39(k) ± 2σ | Age ± 2σ (Ma)             | MSWD            |
|-----------------|-----------------------|------------------|---------------------------|-----------------|
| Normal Isochron | 281.92 ±17.44         | 3.88019 ±0.00220 | 11.46 ±0.04               | 9.57            |
| Error Chron     | ±6.19%                | ±0.06%           | ±0.31%                    | 0%              |
|                 |                       |                  | Full External Error ±0.60 |                 |
|                 |                       |                  | Analytical Error ±0.01    |                 |
|                 |                       |                  |                           |                 |
| Statistics      | 2σ Confidence Limit   | 1.55             | Convergence               | 0.000000032361  |
|                 | Error Magnification   | 3.0929           | Number of Iterations      | 1               |
|                 | Number of Data Points | 28               | Calculated Line           | Weighted York-2 |

| Inverse Isochron |        |   | 39(k)/40(a+r) ± 2σ   | 36(a)/40(a+r) ± 2σ     | r.i.   |
|------------------|--------|---|----------------------|------------------------|--------|
| 20F23165         | 17.0 % | ✓ | 0.2553236 ±0.0002036 | 0.00003110 ±0.00000046 | 0.0004 |
| 20F23166         | 17.0 % | ✓ | 0.2580562 ±0.0002067 | 0.00000185 ±0.00000049 | 0.0000 |
| 20F23168         | 17.0 % | ✓ | 0.2564067 ±0.0002117 | 0.00002003 ±0.00000104 | 0.0003 |
| 20F23169         | 17.0 % | ✓ | 0.2574062 ±0.0002076 | 0.00000831 ±0.00000062 | 0.0002 |
| 20F23171         | 17.0 % | ✓ | 0.2568815 ±0.0002042 | 0.00001021 ±0.00000037 | 0.0002 |
| 20F23172         | 17.0 % | ✓ | 0.2575525 ±0.0002062 | 0.00000351 ±0.00000048 | 0.0001 |
| 20F23174         | 17.0 % | ✓ | 0.2577010 ±0.0002114 | 0.00000233 ±0.00000085 | 0.0000 |
| 20F23175         | 17.0 % | ✓ | 0.2573026 ±0.0002083 | 0.00000721 ±0.00000066 | 0.0001 |
| 20F23177         | 17.0 % | ✓ | 0.2576199 ±0.0002117 | 0.00000798 ±0.00000104 | 0.0001 |
| 20F23178         | 17.0 % | ✓ | 0.2507765 ±0.0002063 | 0.00009292 ±0.00000139 | 0.0013 |
| 20F23180         | 17.0 % | ✓ | 0.2570423 ±0.0002128 | 0.00001011 ±0.00000095 | 0.0003 |
| 20F23181         | 17.0 % | ✓ | 0.2472313 ±0.0002026 | 0.00014197 ±0.00000167 | 0.0015 |
| 20F23183         | 17.0 % | ✓ | 0.2577390 ±0.0002103 | 0.00000140 ±0.00000083 | 0.0000 |
| 20F23184         | 17.0 % | ✓ | 0.2576054 ±0.0002107 | 0.00000253 ±0.00000084 | 0.0001 |
| 20F23186         | 17.0 % | ✓ | 0.2580308 ±0.0002209 | 0.00000332 ±0.00000149 | 0.0001 |
| 20F23187         | 17.0 % |   | 0.2573038 ±0.0002106 | 0.00000032 ±0.00000084 | 0.0000 |
| 20F23189         | 17.0 % | ✓ | 0.2573933 ±0.0002070 | 0.00000302 ±0.00000061 | 0.0000 |
| 20F23190         | 17.0 % | ✓ | 0.2575944 ±0.0002060 | 0.00000072 ±0.00000048 | 0.0000 |
| 20F23192         | 17.0 % | ✓ | 0.2582307 ±0.0002146 | 0.00000460 ±0.00000088 | 0.0001 |
| 20F23193         | 17.0 % | ✓ | 0.2580642 ±0.0002121 | 0.00000378 ±0.00000081 | 0.0001 |
| 20F23195         | 17.0 % | ✓ | 0.2579098 ±0.0002077 | 0.00000484 ±0.00000055 | 0.0001 |
| 20F23196         | 17.0 % | ✓ | 0.2552078 ±0.0002079 | 0.00003905 ±0.00000092 | 0.0007 |
| 20F23198         | 17.0 % | ✓ | 0.2563028 ±0.0002095 | 0.00001810 ±0.00000113 | 0.0003 |
| 20F23199         | 17.0 % | ✓ | 0.2577648 ±0.0002141 | 0.00000325 ±0.00000112 | 0.0001 |
| 20F23201         | 17.0 % | ✓ | 0.2577553 ±0.0002111 | 0.00000474 ±0.00000088 | 0.0001 |
| 20F23202         | 17.0 % | ✓ | 0.2574740 ±0.0002122 | 0.00000859 ±0.00000109 | 0.0002 |
| 20F23204         | 17.0 % | ✓ | 0.2563943 ±0.0002158 | 0.00001938 ±0.00000131 | 0.0004 |
| 20F23205         | 17.0 % | ✓ | 0.2573978 ±0.0002140 | 0.00000436 ±0.00000105 | 0.0001 |
| 20F23207         | 17.0 % |   | 0.2561524 ±0.0002130 | 0.00005223 ±0.00000131 | 0.0009 |
| 20F23208         | 17.0 % | ✓ | 0.2579093 ±0.0002080 | 0.00000343 ±0.00000068 | 0.0001 |

| Results          | 40(a)/36(a) ± 2σ      | 40(r)/39(k) ± 2σ | Age ± 2σ (Ma)             | MSWD            |
|------------------|-----------------------|------------------|---------------------------|-----------------|
| Inverse Isochron | 296.70 ±12.95         | 3.87634 ±0.00164 | 11.45 ±0.04               | 5.26            |
| Error Chron      | ±4.37%                | ±0.04%           | ±0.31%                    | 0%              |
|                  |                       |                  | Full External Error ±0.60 |                 |
|                  |                       |                  | Analytical Error ±0.00    |                 |
|                  |                       |                  |                           |                 |
| Statistics       | 2σ Confidence Limit   | 1.55             | Convergence               | 0.0002169258    |
|                  | Error Magnification   | 2.2931           | Number of Iterations      | 2               |
|                  | Number of Data Points | 28               | Calculated Line           | Weighted York-2 |
|                  | Spreading Factor      | 4.3%             |                           |                 |

| Degassing<br>Patterns |        | 36Ar(a) |           | 36Ar(c) | %1σ       | 36Ar(ca) | %1σ       | 36Ar(cl) | %1σ       | 37Ar(ca) | %1σ      | 38Ar(a) | %1σ       | 38Ar(c) | %1σ       | 38Ar(k) | %1σ      | 38Ar(ca) | %1σ       | 38Ar(cl) | %1σ       | 39Ar(k) | %1σ      | 39Ar(ca) | %1σ       | 40Ar(r) | %1σ      | 40Ar(a) | %1σ      | 40Ar(c) | %1σ       | 40Ar(k) | %1σ       |      |
|-----------------------|--------|---------|-----------|---------|-----------|----------|-----------|----------|-----------|----------|----------|---------|-----------|---------|-----------|---------|----------|----------|-----------|----------|-----------|---------|----------|----------|-----------|---------|----------|---------|----------|---------|-----------|---------|-----------|------|
|                       |        | [fA]    |           | [fA]    |           | [fA]     |           | [fA]     |           | [fA]     |          | [fA]    |           | [fA]    |           | [fA]    |          | [fA]     |           | [fA]     |           | [fA]    |          | [fA]     |           | [fA]    |          | [fA]    |          | [fA]    |           | [fA]    |           |      |
| 20F23165              | 17.0 % | ✓       | 0.0747145 | 0.74    | 0.0000000 | 0.00     | 0.0020652 | 1.52     | 0.0000000 | 0.00     | 7.640362 | 1.51    | 0.0140837 | 0.75    | 0.0000000 | 0.00    | 7.408472 | 0.10     | 0.0013753 | 9.75     | 0.0000000 | 0.00    | 613.4364 | 0.04     | 0.0049089 | 1.77    | 2380.277 | 0.01    | 22.30675 | 0.74    | 0.0000000 | 0.00    | 0.3723559 | 9.65 |
| 20F23166              | 17.0 % | ✓       | 0.0025822 | 13.25   | 0.0000000 | 0.00     | 0.0013415 | 2.27     | 0.0000011 | 282.31   | 4.963005 | 2.26    | 0.0004867 | 13.25   | 0.0000000 | 0.00    | 4.357742 | 0.10     | 0.0008933 | 9.89     | 0.0052890 | 282.31  | 360.8299 | 0.04     | 0.0031887 | 2.44    | 1397.490 | 0.01    | 0.77093  | 13.25   | 0.0000000 | 0.00    | 0.2190237 | 9.65 |
| 20F23168              | 17.0 % | ✓       | 0.0129884 | 2.61    | 0.0000000 | 0.00     | 0.0006033 | 4.54     | 0.0000000 | 0.00     | 2.231934 | 4.53    | 0.0024483 | 2.61    | 0.0000000 | 0.00    | 2.008292 | 0.10     | 0.0004017 | 10.64    | 0.0000000 | 0.00    | 166.2907 | 0.04     | 0.0014340 | 4.62    | 644.665  | 0.02    | 3.87780  | 2.61    | 0.0000000 | 0.00    | 0.1009384 | 9.65 |
| 20F23169              | 17.0 % | ✓       | 0.0090581 | 3.75    | 0.0000000 | 0.00     | 0.0011527 | 2.29     | 0.0000000 | 0.00     | 4.264474 | 2.28    | 0.0017075 | 3.75    | 0.0000000 | 0.00    | 3.386587 | 0.10     | 0.0007676 | 9.90     | 0.0000000 | 0.00    | 280.4163 | 0.04     | 0.0027399 | 2.46    | 1086.688 | 0.01    | 2.70439  | 3.75    | 0.0000000 | 0.00    | 0.1702127 | 9.65 |
| 20F23171              | 17.0 % | ✓       | 0.0259909 | 1.80    | 0.0000000 | 0.00     | 0.0023506 | 1.44     | 0.0000000 | 0.00     | 8.696311 | 1.43    | 0.0048993 | 1.80    | 0.0000000 | 0.00    | 7.900436 | 0.10     | 0.0015653 | 9.74     | 0.0000000 | 0.00    | 654.1721 | 0.04     | 0.0055874 | 1.70    | 2538.831 | 0.01    | 7.75986  | 1.80    | 0.0000000 | 0.00    | 0.3970825 | 9.65 |
| 20F23172              | 17.0 % | ✓       | 0.0049271 | 6.81    | 0.0000000 | 0.00     | 0.0011386 | 2.78     | 0.0000000 | 0.00     | 4.212345 | 2.78    | 0.0009288 | 6.82    | 0.0000000 | 0.00    | 4.362226 | 0.10     | 0.0007582 | 10.02    | 0.0000000 | 0.00    | 361.2011 | 0.04     | 0.0027064 | 2.92    | 1400.966 | 0.01    | 1.47104  | 6.82    | 0.0000000 | 0.00    | 0.2192491 | 9.65 |
| 20F23174              | 17.0 % | ✓       | 0.0017140 | 18.26   | 0.0000000 | 0.00     | 0.0006117 | 4.78     | 0.0000000 | 0.00     | 2.263033 | 4.78    | 0.0003231 | 18.26   | 0.0000000 | 0.00    | 2.292507 | 0.10     | 0.0004073 | 10.75    | 0.0000000 | 0.00    | 189.8242 | 0.04     | 0.0014540 | 4.87    | 736.095  | 0.01    | 0.51173  | 18.26   | 0.0000000 | 0.00    | 0.1152233 | 9.65 |
| 20F23175              | 17.0 % | ✓       | 0.0077667 | 4.60    | 0.0000000 | 0.00     | 0.0009643 | 3.06     | 0.0000000 | 0.00     | 3.567495 | 3.06    | 0.0014640 | 4.60    | 0.0000000 | 0.00    | 3.345363 | 0.10     | 0.0006421 | 10.10    | 0.0000000 | 0.00    | 277.0028 | 0.04     | 0.0022921 | 3.19    | 1074.246 | 0.01    | 2.31882  | 4.60    | 0.0000000 | 0.00    | 0.1681407 | 9.65 |
| 20F23177              | 17.0 % | ✓       | 0.0052445 | 6.51    | 0.0000000 | 0.00     | 0.0004779 | 6.40     | 0.0000000 | 0.00     | 1.767901 | 6.40    | 0.0009886 | 6.51    | 0.0000000 | 0.00    | 2.044062 | 0.10     | 0.0003182 | 11.56    | 0.0000000 | 0.00    | 169.2524 | 0.04     | 0.0011359 | 6.46    | 655.419  | 0.02    | 1.56581  | 6.51    | 0.0000000 | 0.00    | 0.1027362 | 9.65 |
| 20F23178              | 17.0 % | ✓       | 0.0687234 | 0.75    | 0.0000000 | 0.00     | 0.0006412 | 4.79     | 0.0000008 | 307.76   | 2.372091 | 4.79    | 0.0129544 | 0.76    | 0.0000000 | 0.00    | 2.239898 | 0.10     | 0.0004270 | 10.75    | 0.0036861 | 307.76  | 185.4680 | 0.04     | 0.0015241 | 4.87    | 719.057  | 0.02    | 20.51805 | 0.75    | 0.0000000 | 0.00    | 0.1125791 | 9.65 |
| 20F23180              | 17.0 % | ✓       | 0.0076992 | 4.71    | 0.0000000 | 0.00     | 0.0005569 | 5.54     | 0.0000000 | 0.00     | 2.060290 | 5.53    | 0.0014513 | 4.71    | 0.0000000 | 0.00    | 2.364305 | 0.10     | 0.0003709 | 11.11    | 0.0000000 | 0.00    | 195.7692 | 0.04     | 0.0013237 | 5.61    | 759.324  | 0.02    | 2.29868  | 4.71    | 0.0000000 | 0.00    | 0.1188319 | 9.65 |
| 20F23181              | 17.0 % | ✓       | 0.0983828 | 0.59    | 0.0000000 | 0.00     | 0.0007449 | 3.91     | 0.0000000 | 0.00     | 2.755693 | 3.91    | 0.0185452 | 0.61    | 0.0000000 | 0.00    | 2.069075 | 0.10     | 0.0004960 | 10.39    | 0.0000000 | 0.00    | 171.3236 | 0.04     | 0.0017705 | 4.02    | 663.596  | 0.03    | 29.37317 | 0.60    | 0.0000000 | 0.00    | 0.1039934 | 9.65 |
| 20F23183              | 17.0 % | ✓       | 0.0010693 | 29.50   | 0.0000000 | 0.00     | 0.0006315 | 4.61     | 0.0000000 | 0.00     | 2.336398 | 4.60    | 0.0002016 | 29.50   | 0.0000000 | 0.00    | 2.379170 | 0.10     | 0.0004206 | 10.67    | 0.0000000 | 0.00    | 197.0001 | 0.04     | 0.0015011 | 4.69    | 764.020  | 0.01    | 0.31925  | 29.50   | 0.0000000 | 0.00    | 0.1195791 | 9.65 |
| 20F23184              | 17.0 % | ✓       | 0.0019235 | 16.60   | 0.0000000 | 0.00     | 0.0006083 | 4.76     | 0.0000000 | 0.00     | 2.250552 | 4.76    | 0.0003626 | 16.60   | 0.0000000 | 0.00    | 2.369958 | 0.10     | 0.0004051 | 10.74    | 0.0000000 | 0.00    | 196.2373 | 0.04     | 0.0014460 | 4.85    | 761.201  | 0.01    | 0.57428  | 16.60   | 0.0000000 | 0.00    | 0.1191161 | 9.65 |
| 20F23186              | 17.0 % | ✓       | 0.0012760 | 22.38   | 0.0000000 | 0.00     | 0.0003286 | 9.24     | 0.0000013 | 160.55   | 1.215580 | 9.24    | 0.0002405 | 22.38   | 0.0000000 | 0.00    | 1.198189 | 0.10     | 0.0002188 | 13.34    | 0.0062691 | 160.56  | 99.2125  | 0.04     | 0.0007810 | 9.28    | 384.118  | 0.02    | 0.38098  | 22.38   | 0.0000000 | 0.00    | 0.0602220 | 9.65 |
| 20F23187              | 17.0 % |         | 0.0002295 | 132.15  | 0.0000000 | 0.00     | 0.0006258 | 4.92     | 0.0000011 | 213.88   | 2.315389 | 4.92    | 0.0000433 | 132.15  | 0.0000000 | 0.00    | 2.244683 | 0.10     | 0.0004168 | 10.81    | 0.0052821 | 213.88  | 185.8643 | 0.04     | 0.0014876 | 5.00    | 722.285  | 0.01    | 0.06853  | 132.15  | 0.0000000 | 0.00    | 0.1128196 | 9.65 |
| 20F23189              | 17.0 % | ✓       | 0.0034524 | 10.16   | 0.0000000 | 0.00     | 0.0011019 | 2.69     | 0.0000000 | 0.00     | 4.076470 | 2.68    | 0.0006508 | 10.16   | 0.0000000 | 0.00    | 3.559061 | 0.10     | 0.0007338 | 10.00    | 0.0000000 | 0.00    | 294.6974 | 0.04     | 0.0026191 | 2.83    | 1143.900 | 0.01    | 1.03074  | 10.16   | 0.0000000 | 0.00    | 0.1788813 | 9.65 |
| 20F23190              | 17.0 % | ✓       | 0.0010999 | 33.06   | 0.0000000 | 0.00     | 0.0011959 | 2.42     | 0.0000000 | 0.00     | 4.424435 | 2.41    | 0.0002073 | 33.06   | 0.0000000 | 0.00    | 4.731297 | 0.10     | 0.0007964 | 9.93     | 0.0000000 | 0.00    | 391.7609 | 0.04     | 0.0028427 | 2.58    | 1520.516 | 0.01    | 0.32839  | 33.06   | 0.0000000 | 0.00    | 0.2377989 | 9.65 |
| 20F23192              | 17.0 % | ✓       | 0.0029980 | 9.58    | 0.0000000 | 0.00     | 0.0005619 | 5.61     | 0.0000026 | 87.58    | 2.078651 | 5.61    | 0.0005651 | 9.58    | 0.0000000 | 0.00    | 2.030916 | 0.10     | 0.0003742 | 11.15    | 0.0122549 | 87.58   | 168.1640 | 0.04     | 0.0013355 | 5.69    | 650.321  | 0.01    | 0.89508  | 9.58    | 0.0000000 | 0.00    | 0.1020755 | 9.65 |
| 20F23193              | 17.0 % | ✓       | 0.0028334 | 10.71   | 0.0000000 | 0.00     | 0.0006602 | 4.99     | 0.0000000 | 0.00     | 2.442491 | 4.99    | 0.0005341 | 10.71   | 0.0000000 | 0.00    | 2.336075 | 0.10     | 0.0004396 | 10.85    | 0.0000000 | 0.00    | 193.4317 | 0.04     | 0.0015693 | 5.07    | 748.703  | 0.01    | 0.84595  | 10.71   | 0.0000000 | 0.00    | 0.1174130 | 9.65 |
| 20F23195              | 17.0 % | ✓       | 0.0057255 | 5.72    | 0.0000000 | 0.00     | 0.0012939 | 2.38     | 0.0000000 | 0.00     | 4.787033 | 2.38    | 0.0010793 | 5.72    | 0.0000000 | 0.00    | 3.682590 | 0.10     | 0.0008617 | 9.92     | 0.0000000 | 0.00    | 304.9259 | 0.04     | 0.0030757 | 2.55    | 1180.587 | 0.01    | 1.70941  | 5.72    | 0.0000000 | 0.00    | 0.1850900 | 9.65 |
| 20F23196              | 17.0 % | ✓       | 0.0375650 | 1.17    | 0.0000000 | 0.00     | 0.0008476 | 3.80     | 0.0000013 | 200.04   | 3.135946 | 3.79    | 0.0070810 | 1.18    | 0.0000000 | 0.00    | 2.965199 | 0.10     | 0.0005645 | 10.35    | 0.0062192 | 200.04  | 245.5245 | 0.04     | 0.0020148 | 3.90    | 950.842  | 0.02    | 11.21542 | 1.18    | 0.0000000 | 0.00    | 0.1490333 | 9.65 |
| 20F23198              | 17.0 % | ✓       | 0.0119794 | 3.12    | 0.0000000 | 0.00     | 0.0005313 | 5.36     | 0.0000000 | #####    | 1.965464 | 5.36    | 0.0022581 | 3.12    | 0.0000000 | 0.00    | 2.048281 | 0.10     | 0.0003538 | 11.02    | 0.0000773 | #####   | 169.6018 | 0.04     | 0.0012628 | 5.44    | 658.148  | 0.02    | 3.57657  | 3.12    | 0.0000000 | 0.00    | 0.1029483 | 9.65 |
| 20F23199              | 17.0 % | ✓       | 0.0018425 | 17.21   | 0.0000000 | 0.00     | 0.0004363 | 7.05     | 0.0000000 | 0.00     | 1.613983 | 7.05    | 0.0003473 | 17.21   | 0.0000000 | 0.00    | 1.767554 | 0.10     | 0.0002905 | 11.93    | 0.0000000 | 0.00    | 146.3570 | 0.04     | 0.0010370 | 7.11    | 567.243  | 0.02    | 0.55011  | 17.21   | 0.0000000 | 0.00    | 0.0888387 | 9.65 |
| 20F23201              | 17.0 % | ✓       | 0.0032321 | 9.27    | 0.0000000 | 0.00     | 0.0005603 | 5.23     | 0.0000002 | #####    | 2.072707 | 5.22    | 0.0006092 | 9.28    | 0.0000000 | 0.00    | 2.120677 | 0.10     | 0.0003731 | 10.96    | 0.0008324 | #####   | 175.5964 | 0.04     | 0.0013317 | 5.30    | 680.287  | 0.01    | 0.96496  | 9.27    | 0.0000000 | 0.00    | 0.1065870 | 9.65 |
| 20F23202              | 17.0 % | ✓       | 0.0050282 | 6.32    | 0.0000000 | 0.00     | 0.0004783 | 6.47     | 0.0000000 | 0.00     | 1.769622 | 6.47    | 0.0009478 | 6.32    | 0.0000000 | 0.00    | 1.819820 | 0.10     | 0.0003185 | 11.60    | 0.0000000 | 0.00    | 150.6847 | 0.04     | 0.0011370 | 6.54    | 583.741  | 0.02    | 1.50122  | 6.32    | 0.0000000 | 0.00    | 0.0914656 | 9.65 |
| 20F23204              | 17.0 % | ✓       | 0.0095984 | 3.37    | 0.0000000 | 0.00     | 0.0004683 | 6.04     | 0.0000000 | 0.00     | 1.732631 | 6.04    | 0.0018093 | 3.38    | 0.0000000 | 0.00    | 1.533536 | 0.10     | 0.0003119 | 11.37    | 0.0000000 | 0.00    | 126.9799 | 0.04     | 0.0011132 | 6.11    | 492.387  | 0.02    | 2.86569  | 3.37    | 0.0000000 | 0.00    | 0.0770768 | 9.65 |
| 20F23205              | 17.0 % | ✓       | 0.0023382 | 12.03   | 0.0000000 | 0.00     | 0.0005524 | 5.10     | 0.0000000 | 0.00     | 2.043582 | 5.10    | 0.0004408 | 12.04   | 0.0000000 | 0.00    | 1.668055 | 0.10     | 0.0003678 | 10.90    | 0.0000000 | 0.00    | 138.1183 | 0.04     | 0.0013130 | 5.18    | 535.897  | 0.02    | 0.69810  | 12.04   | 0.0000000 | 0.00    | 0.0838378 | 9.65 |
| 20F23207              | 17.0 % |         | 0.0307663 | 1.25    | 0.0000000 | 0.00     | 0.0005590 | 5.26     | 0.0000000 | 0.00     | 2.068036 | 5.26    | 0.0057994 | 1.26    | 0.0000000 | 0.00    | 1.822205 | 0.10     | 0.0003722 | 10.97    | 0.0000000 | 0.00    | 150.8822 | 0.04     | 0.0013287 | 5.34    | 579.848  | 0.02    | 9.18558  | 1.26    | 0.0000000 | 0.00    | 0.0915855 | 9.65 |
| 20F23208              | 17.0 % | ✓       | 0.0033878 | 9.95    | 0.0000000 | 0.00     | 0.0009203 | 3.24     | 0.0000000 | 0.00     | 3.404704 | 3.23    | 0.0006386 | 9.95    | 0.0000000 | 0.00    | 3.072544 | 0.10     | 0.0006128 | 10.16    | 0.0000000 | 0.00    | 254.4128 | 0.04     | 0.0021875 | 3       |          |         |          |         |           |         |           |      |

| Additional Parameters |        |   | 40Ar/39Ar | 1σ       | 37Ar/39Ar | 1σ       | 36Ar/39Ar | 1σ       | Time (days) | 37Ar (decay) | 39Ar (decay) | 40Ar (moles) |
|-----------------------|--------|---|-----------|----------|-----------|----------|-----------|----------|-------------|--------------|--------------|--------------|
| 20F23165              | 17.0 % | ✓ | 3.917174  | 0.001560 | 0.012455  | 0.000188 | 0.000125  | 0.000001 | 131.921     | 13.574164    | 1.00093215   | 8.506E-11    |
| 20F23166              | 17.0 % | ✓ | 3.875698  | 0.001551 | 0.013754  | 0.000311 | 0.000011  | 0.000001 | 131.926     | 13.575654    | 1.00093219   | 4.951E-11    |
| 20F23168              | 17.0 % | ✓ | 3.900627  | 0.001609 | 0.013422  | 0.000608 | 0.000082  | 0.000002 | 131.939     | 13.579006    | 1.00093228   | 2.296E-11    |
| 20F23169              | 17.0 % | ✓ | 3.885480  | 0.001566 | 0.015208  | 0.000347 | 0.000036  | 0.000001 | 131.944     | 13.580496    | 1.00093232   | 3.857E-11    |
| 20F23171              | 17.0 % | ✓ | 3.893420  | 0.001547 | 0.013294  | 0.000191 | 0.000043  | 0.000001 | 131.956     | 13.583663    | 1.00093240   | 9.016E-11    |
| 20F23172              | 17.0 % | ✓ | 3.883281  | 0.001553 | 0.011662  | 0.000324 | 0.000017  | 0.000001 | 131.963     | 13.585340    | 1.00093244   | 4.965E-11    |
| 20F23174              | 17.0 % | ✓ | 3.881044  | 0.001591 | 0.011922  | 0.000570 | 0.000012  | 0.000002 | 131.974     | 13.588508    | 1.00093253   | 2.608E-11    |
| 20F23175              | 17.0 % | ✓ | 3.887049  | 0.001572 | 0.012879  | 0.000394 | 0.000032  | 0.000001 | 131.981     | 13.590186    | 1.00093257   | 3.812E-11    |
| 20F23177              | 17.0 % | ✓ | 3.882268  | 0.001594 | 0.010445  | 0.000668 | 0.000034  | 0.000002 | 131.992     | 13.593355    | 1.00093265   | 2.326E-11    |
| 20F23178              | 17.0 % | ✓ | 3.988189  | 0.001640 | 0.012790  | 0.000612 | 0.000374  | 0.000003 | 131.998     | 13.594847    | 1.00093269   | 2.618E-11    |
| 20F23180              | 17.0 % | ✓ | 3.890991  | 0.001609 | 0.010524  | 0.000582 | 0.000042  | 0.000002 | 132.010     | 13.598204    | 1.00093278   | 2.697E-11    |
| 20F23181              | 17.0 % | ✓ | 4.045360  | 0.001656 | 0.016085  | 0.000629 | 0.000579  | 0.000003 | 132.016     | 13.599696    | 1.00093282   | 2.453E-11    |
| 20F23183              | 17.0 % | ✓ | 3.880471  | 0.001582 | 0.011860  | 0.000546 | 0.000009  | 0.000002 | 132.028     | 13.602868    | 1.00093290   | 2.706E-11    |
| 20F23184              | 17.0 % | ✓ | 3.882485  | 0.001587 | 0.011468  | 0.000546 | 0.000013  | 0.000002 | 132.034     | 13.604547    | 1.00093295   | 2.697E-11    |
| 20F23186              | 17.0 % | ✓ | 3.876082  | 0.001658 | 0.012252  | 0.001132 | 0.000016  | 0.000003 | 132.046     | 13.607720    | 1.00093303   | 1.361E-11    |
| 20F23187              | 17.0 % |   | 3.887032  | 0.001590 | 0.012457  | 0.000612 | 0.000005  | 0.000002 | 132.052     | 13.609400    | 1.00093308   | 2.558E-11    |
| 20F23189              | 17.0 % | ✓ | 3.885677  | 0.001561 | 0.013833  | 0.000371 | 0.000015  | 0.000001 | 132.064     | 13.612574    | 1.00093316   | 4.054E-11    |
| 20F23190              | 17.0 % | ✓ | 3.882651  | 0.001552 | 0.011294  | 0.000272 | 0.000006  | 0.000001 | 132.070     | 13.614254    | 1.00093320   | 5.385E-11    |
| 20F23192              | 17.0 % | ✓ | 3.873083  | 0.001608 | 0.012361  | 0.000694 | 0.000021  | 0.000002 | 132.082     | 13.617429    | 1.00093329   | 2.306E-11    |
| 20F23193              | 17.0 % | ✓ | 3.875581  | 0.001591 | 0.012627  | 0.000630 | 0.000018  | 0.000002 | 132.088     | 13.618924    | 1.00093333   | 2.654E-11    |
| 20F23195              | 17.0 % | ✓ | 3.877892  | 0.001560 | 0.015699  | 0.000373 | 0.000023  | 0.000001 | 132.100     | 13.622287    | 1.00093341   | 4.186E-11    |
| 20F23196              | 17.0 % | ✓ | 3.918950  | 0.001596 | 0.012772  | 0.000484 | 0.000156  | 0.000002 | 132.106     | 13.623782    | 1.00093345   | 3.406E-11    |
| 20F23198              | 17.0 % | ✓ | 3.902213  | 0.001594 | 0.011589  | 0.000621 | 0.000074  | 0.000002 | 132.117     | 13.626959    | 1.00093354   | 2.343E-11    |
| 20F23199              | 17.0 % | ✓ | 3.880085  | 0.001611 | 0.011028  | 0.000777 | 0.000016  | 0.000002 | 132.124     | 13.628641    | 1.00093358   | 2.010E-11    |
| 20F23201              | 17.0 % | ✓ | 3.880226  | 0.001588 | 0.011804  | 0.000617 | 0.000022  | 0.000002 | 132.135     | 13.631820    | 1.00093367   | 2.412E-11    |
| 20F23202              | 17.0 % | ✓ | 3.884466  | 0.001600 | 0.011744  | 0.000760 | 0.000037  | 0.000002 | 132.142     | 13.633503    | 1.00093371   | 2.072E-11    |
| 20F23204              | 17.0 % | ✓ | 3.900815  | 0.001640 | 0.013645  | 0.000824 | 0.000079  | 0.000003 | 132.153     | 13.636682    | 1.00093379   | 1.753E-11    |
| 20F23205              | 17.0 % | ✓ | 3.885606  | 0.001614 | 0.014796  | 0.000754 | 0.000021  | 0.000002 | 132.159     | 13.638178    | 1.00093383   | 1.900E-11    |
| 20F23207              | 17.0 % |   | 3.904499  | 0.001622 | 0.013706  | 0.000721 | 0.000208  | 0.000003 | 132.172     | 13.641546    | 1.00093392   | 2.086E-11    |
| 20F23208              | 17.0 % | ✓ | 3.877906  | 0.001563 | 0.013382  | 0.000432 | 0.000017  | 0.000001 | 132.177     | 13.643043    | 1.00093396   | 3.493E-11    |



| Procedure<br>Blanks |        | 36Ar ± 1σ (SE)<br>[fA] | 37Ar ± 1σ (SE)<br>[fA] | 38Ar ± 1σ (SE)<br>[fA] | 39Ar ± 1σ (SE)<br>[fA] | 40Ar ± 1σ (SE)<br>[fA] |
|---------------------|--------|------------------------|------------------------|------------------------|------------------------|------------------------|
| 20F23165            | 17.0 % | 0.0049577 ±0.0001525   | 0.0190628 ±0.0057099   | 0.0050611 ±0.0060415   | 0.0053899 ±0.0063920   | 1.0622959 ±0.0159360   |
| 20F23166            | 17.0 % | 0.0049577 ±0.0001525   | 0.0190628 ±0.0057099   | 0.0050611 ±0.0060415   | 0.0053899 ±0.0063920   | 1.0622959 ±0.0159360   |
| 20F23168            | 17.0 % | 0.0049353 ±0.0001728   | 0.0187193 ±0.0049059   | 0.0034804 ±0.0065799   | 0.0228026 ±0.0068289   | 1.2461289 ±0.0146260   |
| 20F23169            | 17.0 % | 0.0049353 ±0.0001728   | 0.0187193 ±0.0049059   | 0.0034804 ±0.0065799   | 0.0228026 ±0.0068289   | 1.2461289 ±0.0146260   |
| 20F23171            | 17.0 % | 0.0047869 ±0.0001591   | 0.0159552 ±0.0062612   | 0.0047600 ±0.0063968   | 0.0142429 ±0.0055573   | 1.1733794 ±0.0148657   |
| 20F23172            | 17.0 % | 0.0047869 ±0.0001591   | 0.0159552 ±0.0062612   | 0.0047600 ±0.0063968   | 0.0142429 ±0.0055573   | 1.1733794 ±0.0148657   |
| 20F23174            | 17.0 % | 0.0056974 ±0.0001906   | 0.0199548 ±0.0056440   | 0.0030888 ±0.0063381   | 0.0135679 ±0.0059324   | 1.2841166 ±0.0145871   |
| 20F23175            | 17.0 % | 0.0056974 ±0.0001906   | 0.0199548 ±0.0056440   | 0.0030888 ±0.0063381   | 0.0135679 ±0.0059324   | 1.2841166 ±0.0145871   |
| 20F23177            | 17.0 % | 0.0052600 ±0.0002047   | 0.0072505 ±0.0058155   | 0.0082500 ±0.0065995   | 0.0090584 ±0.0058438   | 1.2607616 ±0.0158945   |
| 20F23178            | 17.0 % | 0.0052600 ±0.0002047   | 0.0072505 ±0.0058155   | 0.0082500 ±0.0065995   | 0.0090584 ±0.0058438   | 1.2607616 ±0.0158945   |
| 20F23180            | 17.0 % | 0.0053317 ±0.0001791   | 0.0098547 ±0.0056389   | 0.0082100 ±0.0058486   | 0.0163436 ±0.0061365   | 1.3746370 ±0.0161937   |
| 20F23181            | 17.0 % | 0.0053317 ±0.0001791   | 0.0098547 ±0.0056389   | 0.0082100 ±0.0058486   | 0.0163436 ±0.0061365   | 1.3746370 ±0.0161937   |
| 20F23183            | 17.0 % | 0.0052246 ±0.0001898   | 0.0061001 ±0.0054010   | 0.0062736 ±0.0059725   | 0.0185320 ±0.0059007   | 1.3854690 ±0.0135899   |
| 20F23184            | 17.0 % | 0.0052246 ±0.0001898   | 0.0061001 ±0.0054010   | 0.0062736 ±0.0059725   | 0.0185320 ±0.0059007   | 1.3854690 ±0.0135899   |
| 20F23186            | 17.0 % | 0.0054951 ±0.0001705   | 0.0162769 ±0.0057524   | 0.0102517 ±0.0067267   | 0.0087138 ±0.0071164   | 1.4399476 ±0.0155770   |
| 20F23187            | 17.0 % | 0.0054951 ±0.0001705   | 0.0162769 ±0.0057524   | 0.0102517 ±0.0067267   | 0.0087138 ±0.0071164   | 1.4399476 ±0.0155770   |
| 20F23189            | 17.0 % | 0.0055012 ±0.0001702   | 0.0196483 ±0.0057325   | 0.0041500 ±0.0067207   | 0.0343538 ±0.0064644   | 1.3541323 ±0.0167183   |
| 20F23190            | 17.0 % | 0.0055012 ±0.0001702   | 0.0196483 ±0.0057325   | 0.0041500 ±0.0067207   | 0.0343538 ±0.0064644   | 1.3541323 ±0.0167183   |
| 20F23192            | 17.0 % | 0.0058001 ±0.0001693   | 0.0156243 ±0.0063079   | 0.0134628 ±0.0064607   | 0.0314019 ±0.0059966   | 1.3130733 ±0.0140494   |
| 20F23193            | 17.0 % | 0.0058001 ±0.0001693   | 0.0156243 ±0.0063079   | 0.0134628 ±0.0064607   | 0.0314019 ±0.0059966   | 1.3130733 ±0.0140494   |
| 20F23195            | 17.0 % | 0.0059619 ±0.0001756   | 0.0223642 ±0.0062425   | 0.0033937 ±0.0064395   | 0.0138375 ±0.0064573   | 1.3785594 ±0.0178873   |
| 20F23196            | 17.0 % | 0.0059619 ±0.0001756   | 0.0223642 ±0.0062425   | 0.0033937 ±0.0064395   | 0.0138375 ±0.0064573   | 1.3785594 ±0.0178873   |
| 20F23198            | 17.0 % | 0.0057775 ±0.0001930   | 0.0148617 ±0.0053399   | 0.0057575 ±0.0067662   | 0.0185390 ±0.0060172   | 1.3139672 ±0.0150837   |
| 20F23199            | 17.0 % | 0.0057775 ±0.0001930   | 0.0148617 ±0.0053399   | 0.0057575 ±0.0067662   | 0.0185390 ±0.0060172   | 1.3139672 ±0.0150837   |
| 20F23201            | 17.0 % | 0.0055425 ±0.0001818   | 0.0208672 ±0.0059799   | 0.0008918 ±0.0056692   | 0.0053499 ±0.0058219   | 1.3566927 ±0.0149648   |
| 20F23202            | 17.0 % | 0.0055425 ±0.0001818   | 0.0208672 ±0.0059799   | 0.0008918 ±0.0056692   | 0.0053499 ±0.0058219   | 1.3566927 ±0.0149648   |
| 20F23204            | 17.0 % | 0.0062712 ±0.0001745   | 0.0254550 ±0.0056063   | 0.0060333 ±0.0063853   | 0.0176937 ±0.0063280   | 1.5564721 ±0.0161125   |
| 20F23205            | 17.0 % | 0.0062712 ±0.0001745   | 0.0254550 ±0.0056063   | 0.0060333 ±0.0063853   | 0.0176937 ±0.0063280   | 1.5564721 ±0.0161125   |
| 20F23207            | 17.0 % | 0.0062712 ±0.0001745   | 0.0254550 ±0.0056063   | 0.0060333 ±0.0063853   | 0.0176937 ±0.0063280   | 1.5564721 ±0.0161125   |
| 20F23208            | 17.0 % | 0.0062712 ±0.0001745   | 0.0254550 ±0.0056063   | 0.0060333 ±0.0063853   | 0.0176937 ±0.0063280   | 1.5564721 ±0.0161125   |

| Intercept Values |        | 36Ar ± 1σ (SE)<br>[fA] | r2     | Regression<br>(type,n) | 37Ar ± 1σ (SE)<br>[fA] | r2     | Regression<br>(type,n) | 38Ar ± 1σ (SE)<br>[fA] | r2     | Regression<br>(type,n) | 39Ar ± 1σ (SE)<br>[fA] | r2     | Regression<br>(type,n) | 40Ar ± 1σ (SE)<br>[fA] | r2     | Regression<br>(type,n) |
|------------------|--------|------------------------|--------|------------------------|------------------------|--------|------------------------|------------------------|--------|------------------------|------------------------|--------|------------------------|------------------------|--------|------------------------|
| 20F23165         | 17.0 % | 0.0806750 ±0.0005068   | 0.9658 | EXP 150 of 150         | 0.5436141 ±0.0058843   | 0.4667 | EXP 150 of 150         | 7.3922498 ±0.0075104   | 0.9903 | EXP 150 of 150         | 612.80880 ±0.03544     | 1.0000 | EXP 150 of 150         | 2404.01878 ±0.07010    | 1.0000 | EXP 149 of 150         |
| 20F23166         | 17.0 % | 0.0088282 ±0.0002995   | 0.9857 | EXP 150 of 150         | 0.3463992 ±0.0057967   | 0.3088 | EXP 146 of 150         | 4.3583995 ±0.0077453   | 0.9720 | EXP 150 of 150         | 360.46320 ±0.02281     | 1.0000 | EXP 149 of 150         | 1399.54234 ±0.05245    | 1.0000 | EXP 150 of 150         |
| 20F23168         | 17.0 % | 0.0183389 ±0.0002840   | 0.9591 | EXP 150 of 150         | 0.1455936 ±0.0055662   | 0.1116 | EXP 148 of 150         | 1.9990625 ±0.0071286   | 0.8907 | EXP 150 of 150         | 166.14194 ±0.01706     | 0.9999 | EXP 150 of 150         | 649.88953 ±0.03560     | 1.0000 | EXP 148 of 150         |
| 20F23169         | 17.0 % | 0.0150049 ±0.0002851   | 0.9787 | EXP 149 of 150         | 0.2951929 ±0.0050739   | 0.2541 | EXP 150 of 150         | 3.3560005 ±0.0062884   | 0.9680 | EXP 147 of 150         | 280.15014 ±0.02050     | 1.0000 | EXP 149 of 150         | 1090.80856 ±0.04757    | 1.0000 | EXP 150 of 150         |
| 20F23171         | 17.0 % | 0.0327363 ±0.0004287   | 0.9861 | EXP 150 of 150         | 0.6240395 ±0.0062265   | 0.4989 | EXP 150 of 150         | 7.8353678 ±0.0069751   | 0.9926 | EXP 149 of 150         | 653.51145 ±0.03245     | 1.0000 | EXP 150 of 150         | 2548.16173 ±0.07451    | 1.0000 | EXP 150 of 150         |
| 20F23172         | 17.0 % | 0.0107687 ±0.0002885   | 0.9887 | EXP 145 of 150         | 0.2940091 ±0.0057777   | 0.2116 | EXP 150 of 150         | 4.3207643 ±0.0070522   | 0.9747 | EXP 150 of 150         | 360.84231 ±0.02191     | 1.0000 | EXP 148 of 150         | 1403.82926 ±0.05648    | 1.0000 | EXP 150 of 150         |
| 20F23174         | 17.0 % | 0.0079909 ±0.0002411   | 0.9796 | EXP 150 of 150         | 0.1465311 ±0.0055690   | 0.0958 | EXP 149 of 150         | 2.2880846 ±0.0058857   | 0.9410 | EXP 150 of 150         | 189.64179 ±0.01860     | 0.9999 | EXP 149 of 150         | 738.00597 ±0.03822     | 1.0000 | EXP 150 of 150         |
| 20F23175         | 17.0 % | 0.0143076 ±0.0002942   | 0.9800 | EXP 150 of 150         | 0.2424648 ±0.0056117   | 0.1814 | EXP 150 of 150         | 3.3247762 ±0.0064695   | 0.9664 | EXP 149 of 150         | 276.73048 ±0.02298     | 0.9999 | EXP 150 of 150         | 1078.01662 ±0.04375    | 1.0000 | EXP 150 of 150         |
| 20F23177         | 17.0 % | 0.0109032 ±0.0002652   | 0.9696 | EXP 150 of 150         | 0.1227633 ±0.0059272   | 0.0297 | EXP 150 of 150         | 2.0331045 ±0.0058793   | 0.9260 | EXP 147 of 150         | 169.08654 ±0.01646     | 0.9999 | EXP 150 of 150         | 658.34854 ±0.03605     | 1.0000 | EXP 150 of 150         |
| 20F23178         | 17.0 % | 0.0736656 ±0.0004489   | 0.8139 | EXP 150 of 150         | 0.1671771 ±0.0059502   | 0.0921 | EXP 149 of 150         | 2.2482233 ±0.0071736   | 0.9122 | EXP 150 of 150         | 185.28565 ±0.01839     | 0.9999 | EXP 149 of 150         | 740.94852 ±0.04275     | 1.0000 | EXP 150 of 150         |
| 20F23180         | 17.0 % | 0.0134735 ±0.0003074   | 0.9725 | EXP 150 of 150         | 0.1416077 ±0.0061742   | 0.0287 | EXP 150 of 150         | 2.3381693 ±0.0061715   | 0.9394 | EXP 147 of 150         | 195.58315 ±0.01992     | 0.9999 | EXP 150 of 150         | 763.11590 ±0.05320     | 0.9999 | EXP 149 of 150         |
| 20F23181         | 17.0 % | 0.1030878 ±0.0005170   | 0.6267 | EXP 149 of 150         | 0.1927081 ±0.0055044   | 0.0441 | EXP 149 of 150         | 2.0726167 ±0.0068128   | 0.9074 | EXP 150 of 150         | 171.16345 ±0.01574     | 0.9999 | EXP 150 of 150         | 694.44758 ±0.03763     | 1.0000 | EXP 149 of 150         |
| 20F23183         | 17.0 % | 0.0069019 ±0.0002448   | 0.9795 | EXP 149 of 150         | 0.1656016 ±0.0057287   | 0.1146 | EXP 146 of 150         | 2.3567436 ±0.0068740   | 0.9250 | EXP 150 of 150         | 196.81513 ±0.01769     | 0.9999 | EXP 150 of 150         | 765.84454 ±0.03824     | 1.0000 | EXP 150 of 150         |
| 20F23184         | 17.0 % | 0.0077214 ±0.0002495   | 0.9805 | EXP 150 of 150         | 0.1592723 ±0.0056929   | 0.0670 | EXP 150 of 150         | 2.3440058 ±0.0058476   | 0.9417 | EXP 147 of 150         | 196.05310 ±0.01765     | 0.9999 | EXP 149 of 150         | 763.27967 ±0.04390     | 1.0000 | EXP 150 of 150         |
| 20F23186         | 17.0 % | 0.0070789 ±0.0002222   | 0.9657 | EXP 150 of 150         | 0.0730242 ±0.0058998   | 0.0250 | EXP 150 of 150         | 1.1944036 ±0.0068110   | 0.7570 | EXP 150 of 150         | 99.11874 ±0.01271      | 0.9998 | EXP 150 of 150         | 385.99882 ±0.02838     | 0.9999 | EXP 150 of 150         |
| 20F23187         | 17.0 % | 0.0063398 ±0.0002439   | 0.9796 | EXP 150 of 150         | 0.1537992 ±0.0060291   | 0.0440 | EXP 150 of 150         | 2.2396830 ±0.0069803   | 0.9095 | EXP 150 of 150         | 185.68102 ±0.01679     | 0.9999 | EXP 150 of 150         | 723.90607 ±0.03837     | 1.0000 | EXP 147 of 150         |
| 20F23189         | 17.0 % | 0.0099925 ±0.0002996   | 0.9804 | EXP 150 of 150         | 0.2797175 ±0.0054951   | 0.1636 | EXP 150 of 150         | 3.5419501 ±0.0065754   | 0.9678 | EXP 150 of 150         | 294.42764 ±0.02058     | 1.0000 | EXP 149 of 150         | 1146.46330 ±0.04404    | 1.0000 | EXP 149 of 150         |
| 20F23190         | 17.0 % | 0.0077653 ±0.0003143   | 0.9869 | EXP 150 of 150         | 0.3052311 ±0.0051826   | 0.2336 | EXP 145 of 150         | 4.7006951 ±0.0076239   | 0.9755 | EXP 150 of 150         | 391.39032 ±0.02409     | 1.0000 | EXP 150 of 150         | 1522.43619 ±0.05251    | 1.0000 | EXP 149 of 150         |
| 20F23192         | 17.0 % | 0.0093133 ±0.0002249   | 0.9784 | EXP 149 of 150         | 0.1369723 ±0.0057601   | 0.0781 | EXP 149 of 150         | 2.0302024 ±0.0067649   | 0.9021 | EXP 150 of 150         | 168.02165 ±0.01903     | 0.9999 | EXP 150 of 150         | 652.63126 ±0.03809     | 1.0000 | EXP 150 of 150         |
| 20F23193         | 17.0 % | 0.0092454 ±0.0002444   | 0.9794 | EXP 150 of 150         | 0.1636626 ±0.0063030   | 0.0967 | EXP 150 of 150         | 2.3227098 ±0.0067430   | 0.9232 | EXP 150 of 150         | 193.26330 ±0.01986     | 0.9999 | EXP 150 of 150         | 750.97934 ±0.03652     | 1.0000 | EXP 150 of 150         |
| 20F23195         | 17.0 % | 0.0128843 ±0.0002693   | 0.9848 | EXP 150 of 150         | 0.3289330 ±0.0053626   | 0.3360 | EXP 150 of 150         | 3.6692319 ±0.0077602   | 0.9610 | EXP 150 of 150         | 304.62535 ±0.02197     | 1.0000 | EXP 150 of 150         | 1183.86030 ±0.04752    | 1.0000 | EXP 149 of 150         |
| 20F23196         | 17.0 % | 0.0438444 ±0.0003922   | 0.9431 | EXP 150 of 150         | 0.2077425 ±0.0060315   | 0.0978 | EXP 150 of 150         | 2.9750209 ±0.0073837   | 0.9449 | EXP 150 of 150         | 245.28466 ±0.02111     | 0.9999 | EXP 149 of 150         | 963.58462 ±0.05233     | 1.0000 | EXP 150 of 150         |
| 20F23198         | 17.0 % | 0.0181151 ±0.0003115   | 0.9533 | EXP 150 of 150         | 0.1293248 ±0.0055609   | 0.0930 | EXP 150 of 150         | 2.0447655 ±0.0066757   | 0.9085 | EXP 150 of 150         | 169.44496 ±0.01459     | 0.9999 | EXP 148 of 150         | 663.14109 ±0.03798     | 1.0000 | EXP 149 of 150         |
| 20F23199         | 17.0 % | 0.0080248 ±0.0002441   | 0.9738 | EXP 149 of 150         | 0.1035255 ±0.0063913   | 0.0117 | EXP 150 of 150         | 1.7542548 ±0.0063950   | 0.8880 | EXP 150 of 150         | 146.22418 ±0.01554     | 0.9999 | EXP 150 of 150         | 569.19562 ±0.03704     | 0.9999 | EXP 150 of 150         |
| 20F23201         | 17.0 % | 0.0092825 ±0.0002312   | 0.9786 | EXP 149 of 150         | 0.1311324 ±0.0051892   | 0.0162 | EXP 149 of 150         | 2.1211377 ±0.0068467   | 0.9155 | EXP 150 of 150         | 175.42016 ±0.01638     | 0.9999 | EXP 149 of 150         | 682.71544 ±0.03648     | 1.0000 | EXP 149 of 150         |
| 20F23202         | 17.0 % | 0.0109728 ±0.0002530   | 0.9718 | EXP 150 of 150         | 0.1088900 ±0.0058737   | 0.0090 | EXP 149 of 150         | 1.7963895 ±0.0073246   | 0.8603 | EXP 150 of 150         | 150.53429 ±0.01482     | 0.9999 | EXP 150 of 150         | 586.69080 ±0.03393     | 1.0000 | EXP 149 of 150         |
| 20F23204         | 17.0 % | 0.0161986 ±0.0002654   | 0.9544 | EXP 149 of 150         | 0.1015602 ±0.0052057   | 0.0875 | EXP 149 of 150         | 1.5177153 ±0.0057973   | 0.8704 | EXP 150 of 150         | 126.86646 ±0.01544     | 0.9999 | EXP 150 of 150         | 496.88594 ±0.03172     | 0.9999 | EXP 150 of 150         |
| 20F23205         | 17.0 % | 0.0091218 ±0.0002139   | 0.9773 | EXP 148 of 150         | 0.1243388 ±0.0051532   | 0.0591 | EXP 148 of 150         | 1.6551340 ±0.0065589   | 0.8732 | EXP 150 of 150         | 137.99348 ±0.01412     | 0.9999 | EXP 148 of 150         | 538.23509 ±0.03708     | 0.9999 | EXP 149 of 150         |
| 20F23207         | 17.0 % | 0.0371630 ±0.0003328   | 0.9211 | EXP 150 of 150         | 0.1260939 ±0.0056316   | 0.0705 | EXP 150 of 150         | 1.8204011 ±0.0066558   | 0.8891 | EXP 150 of 150         | 150.74408 ±0.01639     | 0.9999 | EXP 150 of 150         | 590.68119 ±0.03709     | 0.9999 | EXP 149 of 150         |
| 20F23208         | 17.0 % | 0.0105197 ±0.0002813   | 0.9787 | EXP 150 of 150         | 0.2240197 ±0.0057098   | 0.1724 | EXP 150 of 150         | 3.0396045 ±0.0059992   | 0.9655 | EXP 150 of 150         | 254.16766 ±0.01803     | 1.0000 | EXP 150 of 150         | 988.15392 ±0.04521     | 1.0000 | EXP 147 of 150         |

| Project Info |        | Analyst     | Irradiation | X-pos | Y-pos | Z/H-pos | Project                | Experiment | Nmb |
|--------------|--------|-------------|-------------|-------|-------|---------|------------------------|------------|-----|
| 20F23165     | 17.0 % | Dan Miggins | 20-OSU-01   | 0.00  | 0.00  | 45.12   | Oregon\Swenton (20-01) | 20F23161   | 01  |
| 20F23166     | 17.0 % | Dan Miggins | 20-OSU-01   | 0.00  | 0.00  | 45.12   | Oregon\Swenton (20-01) | 20F23161   | 01  |
| 20F23168     | 17.0 % | Dan Miggins | 20-OSU-01   | 0.00  | 0.00  | 45.12   | Oregon\Swenton (20-01) | 20F23161   | 01  |
| 20F23169     | 17.0 % | Dan Miggins | 20-OSU-01   | 0.00  | 0.00  | 45.12   | Oregon\Swenton (20-01) | 20F23161   | 01  |
| 20F23171     | 17.0 % | Dan Miggins | 20-OSU-01   | 0.00  | 0.00  | 45.12   | Oregon\Swenton (20-01) | 20F23161   | 01  |
| 20F23172     | 17.0 % | Dan Miggins | 20-OSU-01   | 0.00  | 0.00  | 45.12   | Oregon\Swenton (20-01) | 20F23161   | 01  |
| 20F23174     | 17.0 % | Dan Miggins | 20-OSU-01   | 0.00  | 0.00  | 45.12   | Oregon\Swenton (20-01) | 20F23161   | 01  |
| 20F23175     | 17.0 % | Dan Miggins | 20-OSU-01   | 0.00  | 0.00  | 45.12   | Oregon\Swenton (20-01) | 20F23161   | 01  |
| 20F23177     | 17.0 % | Dan Miggins | 20-OSU-01   | 0.00  | 0.00  | 45.12   | Oregon\Swenton (20-01) | 20F23161   | 01  |
| 20F23178     | 17.0 % | Dan Miggins | 20-OSU-01   | 0.00  | 0.00  | 45.12   | Oregon\Swenton (20-01) | 20F23161   | 01  |
| 20F23180     | 17.0 % | Dan Miggins | 20-OSU-01   | 0.00  | 0.00  | 45.12   | Oregon\Swenton (20-01) | 20F23161   | 01  |
| 20F23181     | 17.0 % | Dan Miggins | 20-OSU-01   | 0.00  | 0.00  | 45.12   | Oregon\Swenton (20-01) | 20F23161   | 01  |
| 20F23183     | 17.0 % | Dan Miggins | 20-OSU-01   | 0.00  | 0.00  | 45.12   | Oregon\Swenton (20-01) | 20F23161   | 01  |
| 20F23184     | 17.0 % | Dan Miggins | 20-OSU-01   | 0.00  | 0.00  | 45.12   | Oregon\Swenton (20-01) | 20F23161   | 01  |
| 20F23186     | 17.0 % | Dan Miggins | 20-OSU-01   | 0.00  | 0.00  | 45.12   | Oregon\Swenton (20-01) | 20F23161   | 01  |
| 20F23187     | 17.0 % | Dan Miggins | 20-OSU-01   | 0.00  | 0.00  | 45.12   | Oregon\Swenton (20-01) | 20F23161   | 01  |
| 20F23189     | 17.0 % | Dan Miggins | 20-OSU-01   | 0.00  | 0.00  | 45.12   | Oregon\Swenton (20-01) | 20F23161   | 01  |
| 20F23190     | 17.0 % | Dan Miggins | 20-OSU-01   | 0.00  | 0.00  | 45.12   | Oregon\Swenton (20-01) | 20F23161   | 01  |
| 20F23192     | 17.0 % | Dan Miggins | 20-OSU-01   | 0.00  | 0.00  | 45.12   | Oregon\Swenton (20-01) | 20F23161   | 01  |
| 20F23193     | 17.0 % | Dan Miggins | 20-OSU-01   | 0.00  | 0.00  | 45.12   | Oregon\Swenton (20-01) | 20F23161   | 01  |
| 20F23195     | 17.0 % | Dan Miggins | 20-OSU-01   | 0.00  | 0.00  | 45.12   | Oregon\Swenton (20-01) | 20F23161   | 01  |
| 20F23196     | 17.0 % | Dan Miggins | 20-OSU-01   | 0.00  | 0.00  | 45.12   | Oregon\Swenton (20-01) | 20F23161   | 01  |
| 20F23198     | 17.0 % | Dan Miggins | 20-OSU-01   | 0.00  | 0.00  | 45.12   | Oregon\Swenton (20-01) | 20F23161   | 01  |
| 20F23199     | 17.0 % | Dan Miggins | 20-OSU-01   | 0.00  | 0.00  | 45.12   | Oregon\Swenton (20-01) | 20F23161   | 01  |
| 20F23201     | 17.0 % | Dan Miggins | 20-OSU-01   | 0.00  | 0.00  | 45.12   | Oregon\Swenton (20-01) | 20F23161   | 01  |
| 20F23202     | 17.0 % | Dan Miggins | 20-OSU-01   | 0.00  | 0.00  | 45.12   | Oregon\Swenton (20-01) | 20F23161   | 01  |
| 20F23204     | 17.0 % | Dan Miggins | 20-OSU-01   | 0.00  | 0.00  | 45.12   | Oregon\Swenton (20-01) | 20F23161   | 01  |
| 20F23205     | 17.0 % | Dan Miggins | 20-OSU-01   | 0.00  | 0.00  | 45.12   | Oregon\Swenton (20-01) | 20F23161   | 01  |
| 20F23207     | 17.0 % | Dan Miggins | 20-OSU-01   | 0.00  | 0.00  | 45.12   | Oregon\Swenton (20-01) | 20F23161   | 01  |
| 20F23208     | 17.0 % | Dan Miggins | 20-OSU-01   | 0.00  | 0.00  | 45.12   | Oregon\Swenton (20-01) | 20F23161   | 01  |

| OSU Argon Geochronology Lab<br>CEOAS Oregon State University, Corvallis, USA |        |          |          |               |                  |                  |       |                     |                    |       |            |       |               |       |           |       |              |                        |     |       |      |      |     |        |
|------------------------------------------------------------------------------|--------|----------|----------|---------------|------------------|------------------|-------|---------------------|--------------------|-------|------------|-------|---------------|-------|-----------|-------|--------------|------------------------|-----|-------|------|------|-----|--------|
| Sample Parameters                                                            |        | Sample   | Material | Location      | Standard Name    | Standard (in Ma) | %1σ   | Standard Reference  | Standard 40Ar/39Ar | %1σ   | J          | %1σ   | Air 40Ar/36Ar | %1σ   | MDF (lin) | %1σ   | Volume Ratio | Sensitivity (mol/volt) | Day | Month | Year | Hour | Min | Resist |
| 20F23165                                                                     | 17.0 % | VS19-106 | Sanidine | Rhyolite Dome | FCT-NM (1C36-20) | 28.201           | 0.082 | Kuiper et al (2008) | 9.58908            | 0.154 | 0.00161908 | 0.154 | 298.69        | 0.118 | 0.9998911 | 0.039 | 1            | 3.54E-14               | 26  | AUG   | 2020 | 12   | 37  | 1      |
| 20F23166                                                                     | 17.0 % | VS19-106 | Sanidine | Rhyolite Dome | FCT-NM (1C36-20) | 28.201           | 0.082 | Kuiper et al (2008) | 9.58908            | 0.154 | 0.00161908 | 0.154 | 298.69        | 0.118 | 0.9998911 | 0.039 | 1            | 3.54E-14               | 26  | AUG   | 2020 | 12   | 45  | 1      |
| 20F23168                                                                     | 17.0 % | VS19-106 | Sanidine | Rhyolite Dome | FCT-NM (1C36-20) | 28.201           | 0.082 | Kuiper et al (2008) | 9.58908            | 0.154 | 0.00161908 | 0.154 | 298.69        | 0.118 | 0.9998911 | 0.039 | 1            | 3.54E-14               | 26  | AUG   | 2020 | 13   | 3   | 1      |
| 20F23169                                                                     | 17.0 % | VS19-106 | Sanidine | Rhyolite Dome | FCT-NM (1C36-20) | 28.201           | 0.082 | Kuiper et al (2008) | 9.58908            | 0.154 | 0.00161908 | 0.154 | 298.69        | 0.118 | 0.9998911 | 0.039 | 1            | 3.54E-14               | 26  | AUG   | 2020 | 13   | 11  | 1      |
| 20F23171                                                                     | 17.0 % | VS19-106 | Sanidine | Rhyolite Dome | FCT-NM (1C36-20) | 28.201           | 0.082 | Kuiper et al (2008) | 9.58908            | 0.154 | 0.00161908 | 0.154 | 298.69        | 0.118 | 0.9998911 | 0.039 | 1            | 3.54E-14               | 26  | AUG   | 2020 | 13   | 28  | 1      |
| 20F23172                                                                     | 17.0 % | VS19-106 | Sanidine | Rhyolite Dome | FCT-NM (1C36-20) | 28.201           | 0.082 | Kuiper et al (2008) | 9.58908            | 0.154 | 0.00161908 | 0.154 | 298.69        | 0.118 | 0.9998911 | 0.039 | 1            | 3.54E-14               | 26  | AUG   | 2020 | 13   | 37  | 1      |
| 20F23174                                                                     | 17.0 % | VS19-106 | Sanidine | Rhyolite Dome | FCT-NM (1C36-20) | 28.201           | 0.082 | Kuiper et al (2008) | 9.58908            | 0.154 | 0.00161908 | 0.154 | 298.69        | 0.118 | 0.9998911 | 0.039 | 1            | 3.54E-14               | 26  | AUG   | 2020 | 13   | 54  | 1      |
| 20F23175                                                                     | 17.0 % | VS19-106 | Sanidine | Rhyolite Dome | FCT-NM (1C36-20) | 28.201           | 0.082 | Kuiper et al (2008) | 9.58908            | 0.154 | 0.00161908 | 0.154 | 298.69        | 0.118 | 0.9998911 | 0.039 | 1            | 3.54E-14               | 26  | AUG   | 2020 | 14   | 3   | 1      |
| 20F23177                                                                     | 17.0 % | VS19-106 | Sanidine | Rhyolite Dome | FCT-NM (1C36-20) | 28.201           | 0.082 | Kuiper et al (2008) | 9.58908            | 0.154 | 0.00161908 | 0.154 | 298.69        | 0.118 | 0.9998911 | 0.039 | 1            | 3.54E-14               | 26  | AUG   | 2020 | 14   | 20  | 1      |
| 20F23178                                                                     | 17.0 % | VS19-106 | Sanidine | Rhyolite Dome | FCT-NM (1C36-20) | 28.201           | 0.082 | Kuiper et al (2008) | 9.58908            | 0.154 | 0.00161908 | 0.154 | 298.69        | 0.118 | 0.9998911 | 0.039 | 1            | 3.54E-14               | 26  | AUG   | 2020 | 14   | 28  | 1      |
| 20F23180                                                                     | 17.0 % | VS19-106 | Sanidine | Rhyolite Dome | FCT-NM (1C36-20) | 28.201           | 0.082 | Kuiper et al (2008) | 9.58908            | 0.154 | 0.00161908 | 0.154 | 298.69        | 0.118 | 0.9998911 | 0.039 | 1            | 3.54E-14               | 26  | AUG   | 2020 | 14   | 46  | 1      |
| 20F23181                                                                     | 17.0 % | VS19-106 | Sanidine | Rhyolite Dome | FCT-NM (1C36-20) | 28.201           | 0.082 | Kuiper et al (2008) | 9.58908            | 0.154 | 0.00161908 | 0.154 | 298.69        | 0.118 | 0.9998911 | 0.039 | 1            | 3.54E-14               | 26  | AUG   | 2020 | 14   | 54  | 1      |
| 20F23183                                                                     | 17.0 % | VS19-106 | Sanidine | Rhyolite Dome | FCT-NM (1C36-20) | 28.201           | 0.082 | Kuiper et al (2008) | 9.58908            | 0.154 | 0.00161908 | 0.154 | 298.69        | 0.118 | 0.9998911 | 0.039 | 1            | 3.54E-14               | 26  | AUG   | 2020 | 15   | 11  | 1      |
| 20F23184                                                                     | 17.0 % | VS19-106 | Sanidine | Rhyolite Dome | FCT-NM (1C36-20) | 28.201           | 0.082 | Kuiper et al (2008) | 9.58908            | 0.154 | 0.00161908 | 0.154 | 298.69        | 0.118 | 0.9998911 | 0.039 | 1            | 3.54E-14               | 26  | AUG   | 2020 | 15   | 20  | 1      |
| 20F23186                                                                     | 17.0 % | VS19-106 | Sanidine | Rhyolite Dome | FCT-NM (1C36-20) | 28.201           | 0.082 | Kuiper et al (2008) | 9.58908            | 0.154 | 0.00161908 | 0.154 | 298.69        | 0.118 | 0.9998911 | 0.039 | 1            | 3.54E-14               | 26  | AUG   | 2020 | 15   | 37  | 1      |
| 20F23187                                                                     | 17.0 % | VS19-106 | Sanidine | Rhyolite Dome | FCT-NM (1C36-20) | 28.201           | 0.082 | Kuiper et al (2008) | 9.58908            | 0.154 | 0.00161908 | 0.154 | 298.69        | 0.118 | 0.9998911 | 0.039 | 1            | 3.54E-14               | 26  | AUG   | 2020 | 15   | 46  | 1      |
| 20F23189                                                                     | 17.0 % | VS19-106 | Sanidine | Rhyolite Dome | FCT-NM (1C36-20) | 28.201           | 0.082 | Kuiper et al (2008) | 9.58908            | 0.154 | 0.00161908 | 0.154 | 298.69        | 0.118 | 0.9998911 | 0.039 | 1            | 3.54E-14               | 26  | AUG   | 2020 | 16   | 3   | 1      |
| 20F23190                                                                     | 17.0 % | VS19-106 | Sanidine | Rhyolite Dome | FCT-NM (1C36-20) | 28.201           | 0.082 | Kuiper et al (2008) | 9.58908            | 0.154 | 0.00161908 | 0.154 | 298.69        | 0.118 | 0.9998911 | 0.039 | 1            | 3.54E-14               | 26  | AUG   | 2020 | 16   | 12  | 1      |
| 20F23192                                                                     | 17.0 % | VS19-106 | Sanidine | Rhyolite Dome | FCT-NM (1C36-20) | 28.201           | 0.082 | Kuiper et al (2008) | 9.58908            | 0.154 | 0.00161908 | 0.154 | 298.69        | 0.118 | 0.9998911 | 0.039 | 1            | 3.54E-14               | 26  | AUG   | 2020 | 16   | 29  | 1      |
| 20F23193                                                                     | 17.0 % | VS19-106 | Sanidine | Rhyolite Dome | FCT-NM (1C36-20) | 28.201           | 0.082 | Kuiper et al (2008) | 9.58908            | 0.154 | 0.00161908 | 0.154 | 298.69        | 0.118 | 0.9998911 | 0.039 | 1            | 3.54E-14               | 26  | AUG   | 2020 | 16   | 37  | 1      |
| 20F23195                                                                     | 17.0 % | VS19-106 | Sanidine | Rhyolite Dome | FCT-NM (1C36-20) | 28.201           | 0.082 | Kuiper et al (2008) | 9.58908            | 0.154 | 0.00161908 | 0.154 | 298.69        | 0.118 | 0.9998911 | 0.039 | 1            | 3.54E-14               | 26  | AUG   | 2020 | 16   | 55  | 1      |
| 20F23196                                                                     | 17.0 % | VS19-106 | Sanidine | Rhyolite Dome | FCT-NM (1C36-20) | 28.201           | 0.082 | Kuiper et al (2008) | 9.58908            | 0.154 | 0.00161908 | 0.154 | 298.69        | 0.118 | 0.9998911 | 0.039 | 1            | 3.54E-14               | 26  | AUG   | 2020 | 17   | 3   | 1      |
| 20F23198                                                                     | 17.0 % | VS19-106 | Sanidine | Rhyolite Dome | FCT-NM (1C36-20) | 28.201           | 0.082 | Kuiper et al (2008) | 9.58908            | 0.154 | 0.00161908 | 0.154 | 298.69        | 0.118 | 0.9998911 | 0.039 | 1            | 3.54E-14               | 26  | AUG   | 2020 | 17   | 20  | 1      |
| 20F23199                                                                     | 17.0 % | VS19-106 | Sanidine | Rhyolite Dome | FCT-NM (1C36-20) | 28.201           | 0.082 | Kuiper et al (2008) | 9.58908            | 0.154 | 0.00161908 | 0.154 | 298.69        | 0.118 | 0.9998911 | 0.039 | 1            | 3.54E-14               | 26  | AUG   | 2020 | 17   | 29  | 1      |
| 20F23201                                                                     | 17.0 % | VS19-106 | Sanidine | Rhyolite Dome | FCT-NM (1C36-20) | 28.201           | 0.082 | Kuiper et al (2008) | 9.58908            | 0.154 | 0.00161908 | 0.154 | 298.69        | 0.118 | 0.9998911 | 0.039 | 1            | 3.54E-14               | 26  | AUG   | 2020 | 17   | 46  | 1      |
| 20F23202                                                                     | 17.0 % | VS19-106 | Sanidine | Rhyolite Dome | FCT-NM (1C36-20) | 28.201           | 0.082 | Kuiper et al (2008) | 9.58908            | 0.154 | 0.00161908 | 0.154 | 298.69        | 0.118 | 0.9998911 | 0.039 | 1            | 3.54E-14               | 26  | AUG   | 2020 | 17   | 55  | 1      |
| 20F23204                                                                     | 17.0 % | VS19-106 | Sanidine | Rhyolite Dome | FCT-NM (1C36-20) | 28.201           | 0.082 | Kuiper et al (2008) | 9.58908            | 0.154 | 0.00161908 | 0.154 | 298.69        | 0.118 | 0.9998911 | 0.039 | 1            | 3.54E-14               | 26  | AUG   | 2020 | 18   | 12  | 1      |
| 20F23205                                                                     | 17.0 % | VS19-106 | Sanidine | Rhyolite Dome | FCT-NM (1C36-20) | 28.201           | 0.082 | Kuiper et al (2008) | 9.58908            | 0.154 | 0.00161908 | 0.154 | 298.69        | 0.118 | 0.9998911 | 0.039 | 1            | 3.54E-14               | 26  | AUG   | 2020 | 18   | 20  | 1      |
| 20F23207                                                                     | 17.0 % | VS19-106 | Sanidine | Rhyolite Dome | FCT-NM (1C36-20) | 28.201           | 0.082 | Kuiper et al (2008) | 9.58908            | 0.154 | 0.00161908 | 0.154 | 298.69        | 0.118 | 0.9998911 | 0.039 | 1            | 3.54E-14               | 26  | AUG   | 2020 | 18   | 38  | 1      |
| 20F23208                                                                     | 17.0 % | VS19-106 | Sanidine | Rhyolite Dome | FCT-NM (1C36-20) | 28.201           | 0.082 | Kuiper et al (2008) | 9.58908            | 0.154 | 0.00161908 | 0.154 | 298.69        | 0.118 | 0.9998911 | 0.039 | 1            | 3.54E-14               | 26  | AUG   | 2020 | 18   | 46  | 1      |



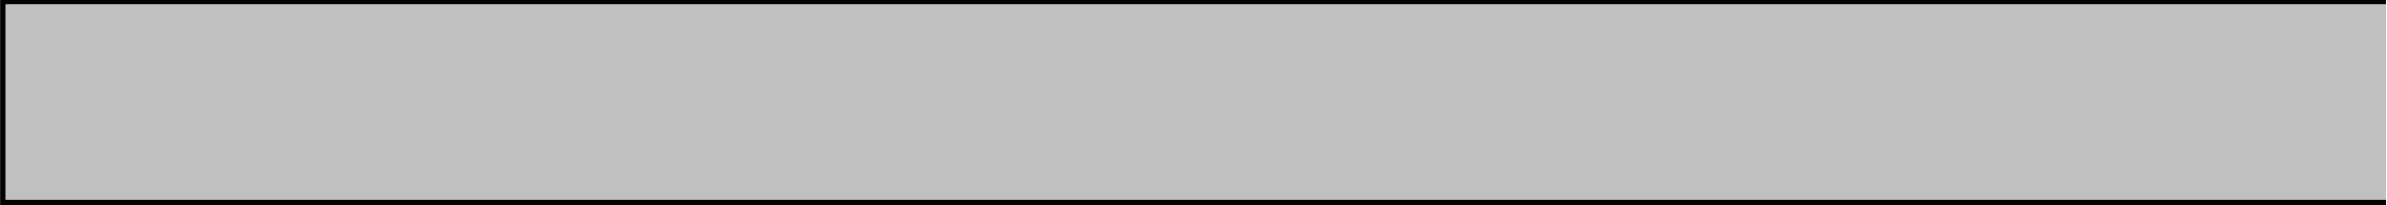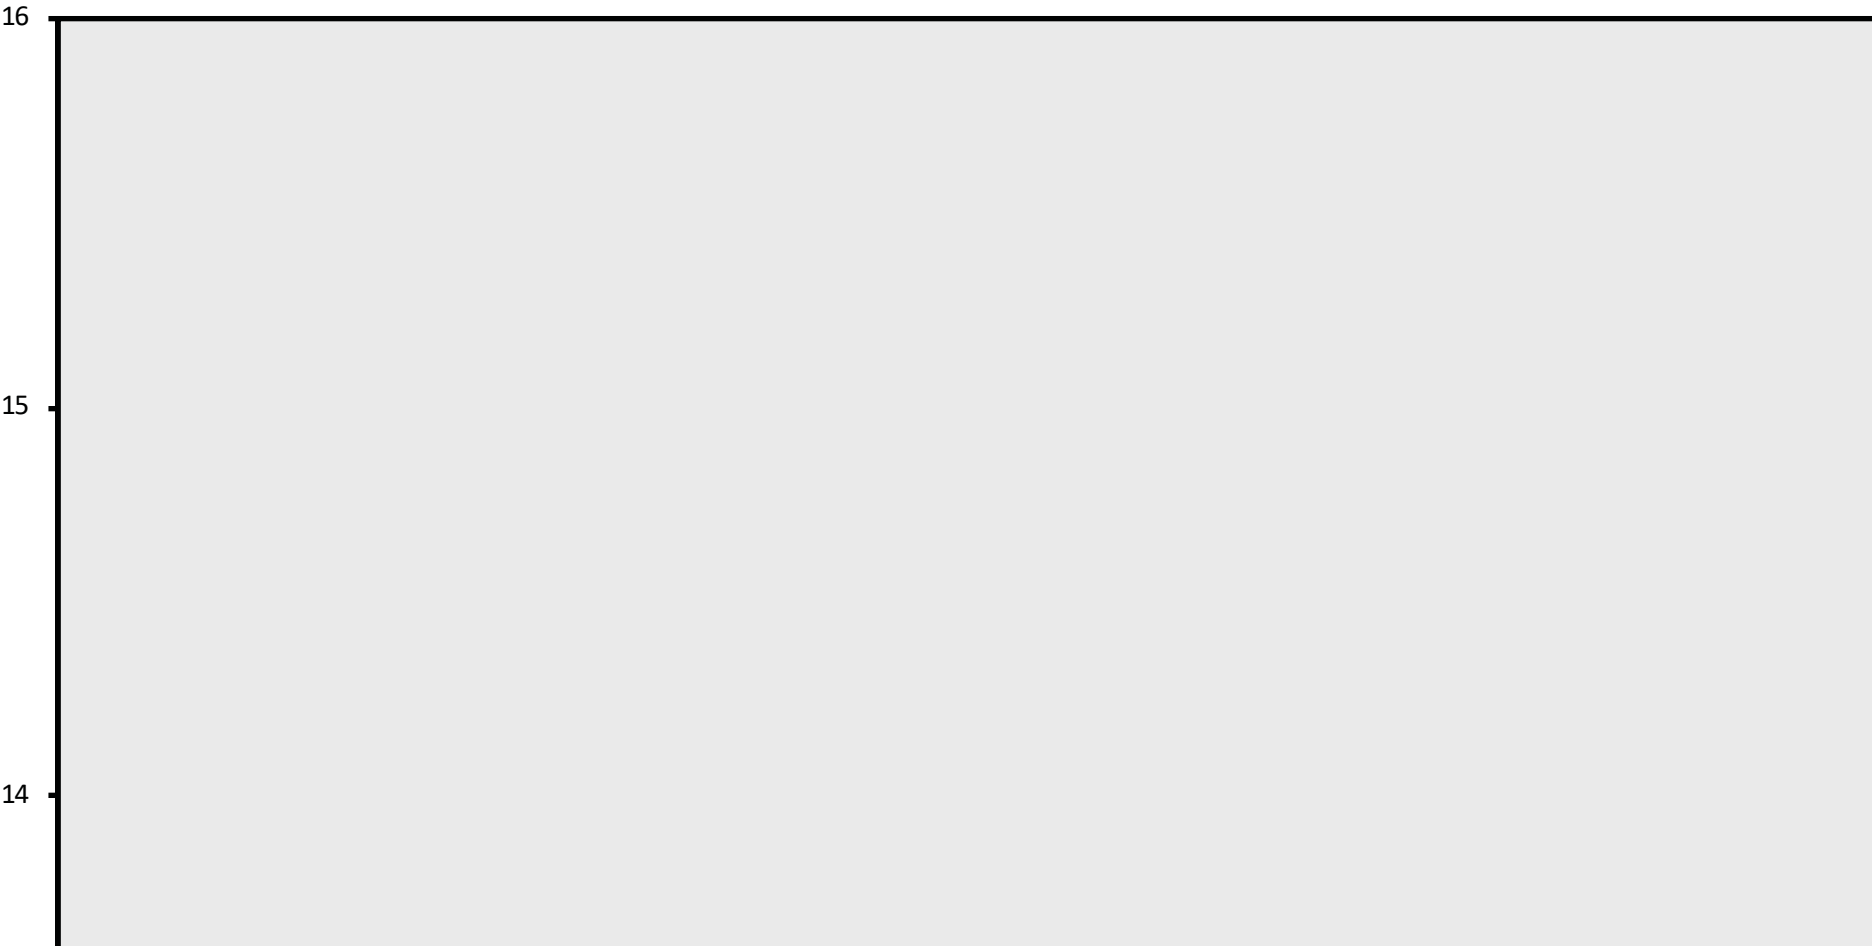

## 20F23161.AGE >>> VS19-106 >>> OREGON | SWENTON (20-01) PROJECT

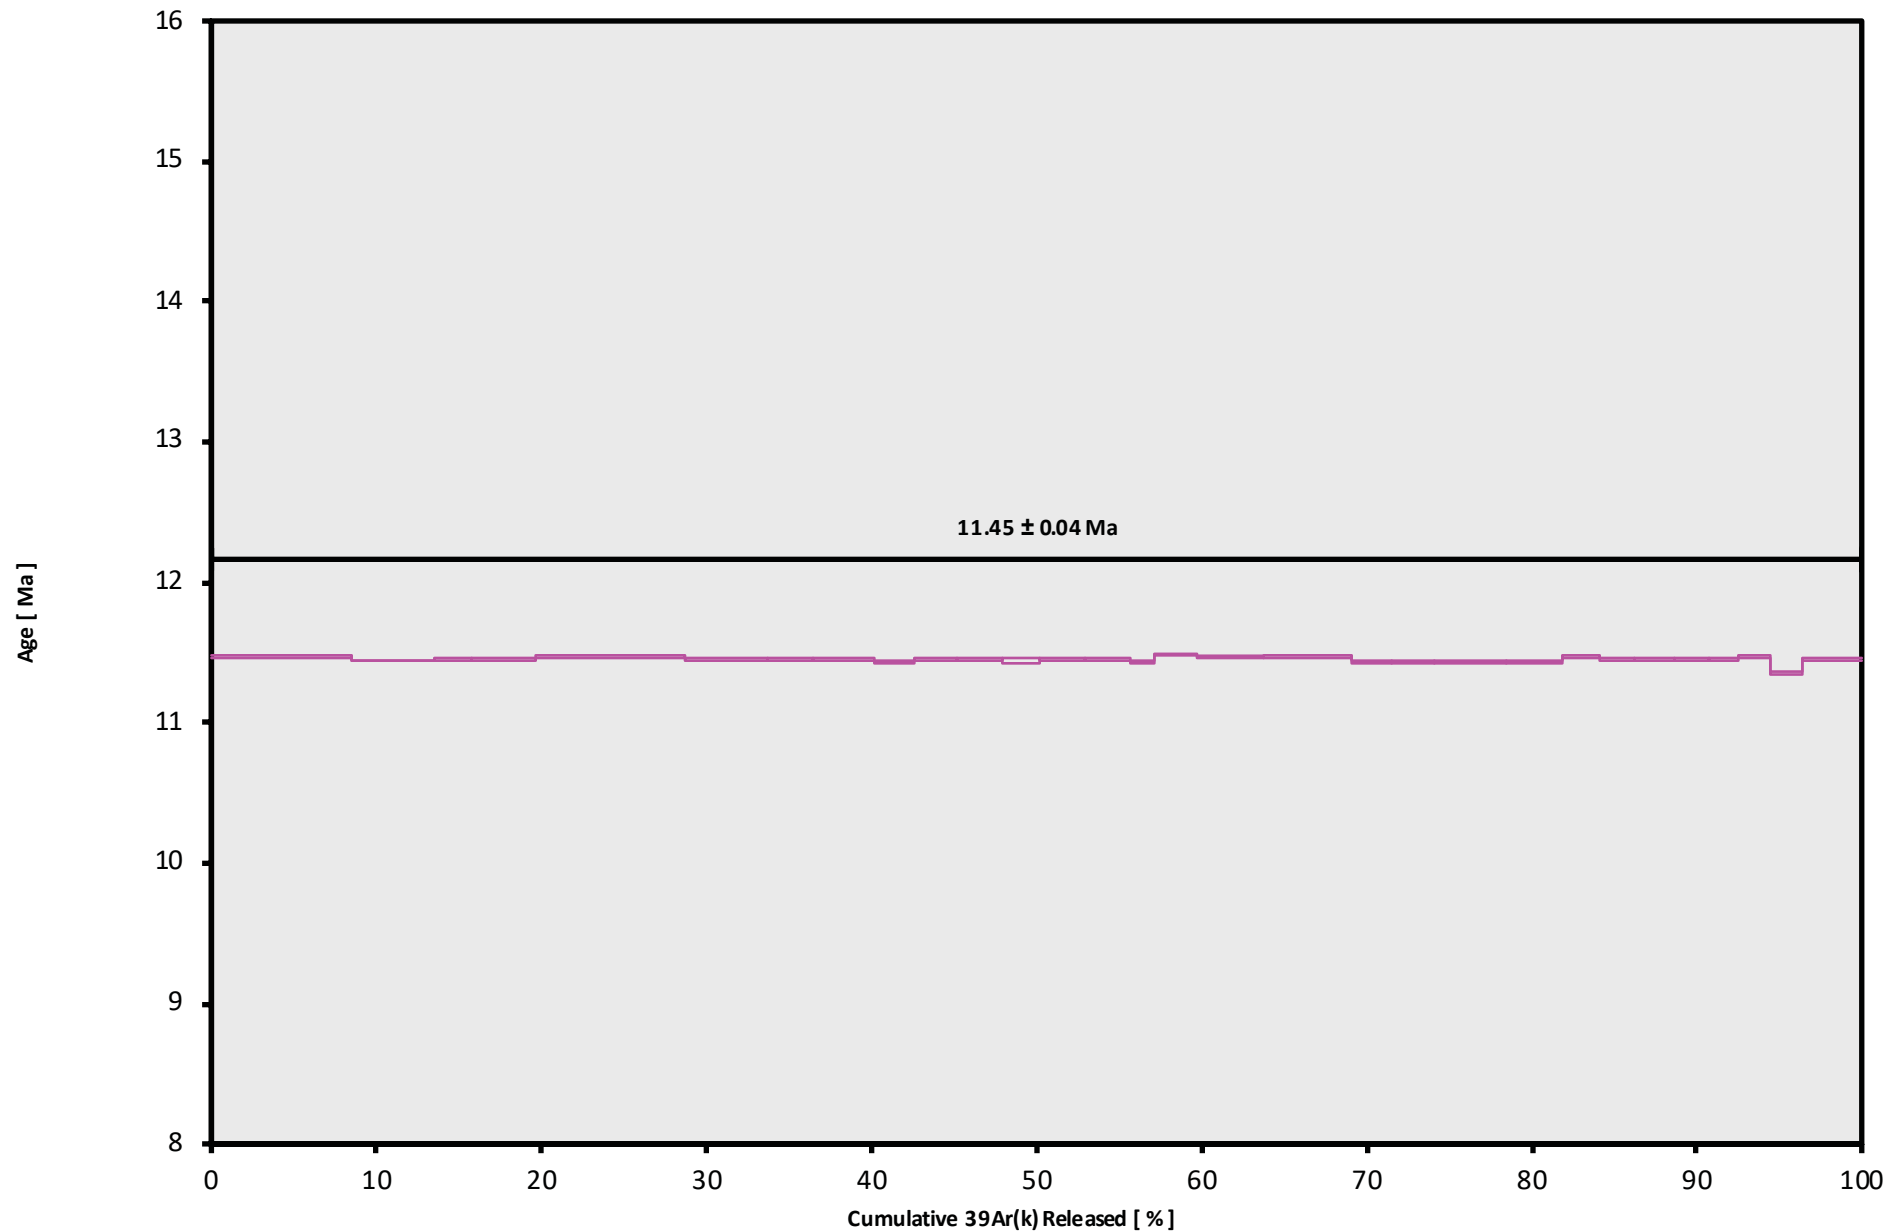

### Ar-Ages in Ma

**WEIGHTED PLATEAU**

**$11.45 \pm 0.04$**

**TOTAL FUSION**

**$11.45 \pm 0.04$**

**NORMAL ISOCHRON**

**$11.46 \pm 0.04$**

**INVERSE ISOCHRON**

**$11.45 \pm 0.04$**

**MSWD (PROBABILITY)**

**5.08 (0%)**

### Sample Info

**Sanidine**

**Rhyolite Dome**

**Dan Miggins**

**IRR = 20-OSU-01 (1C36-20)**

**$J = 0.00161908 \pm$**

**0.00000249**

20F23161.AGE >>> VS19-106 >>> OREGON | SWENTON (20-01) PROJECT

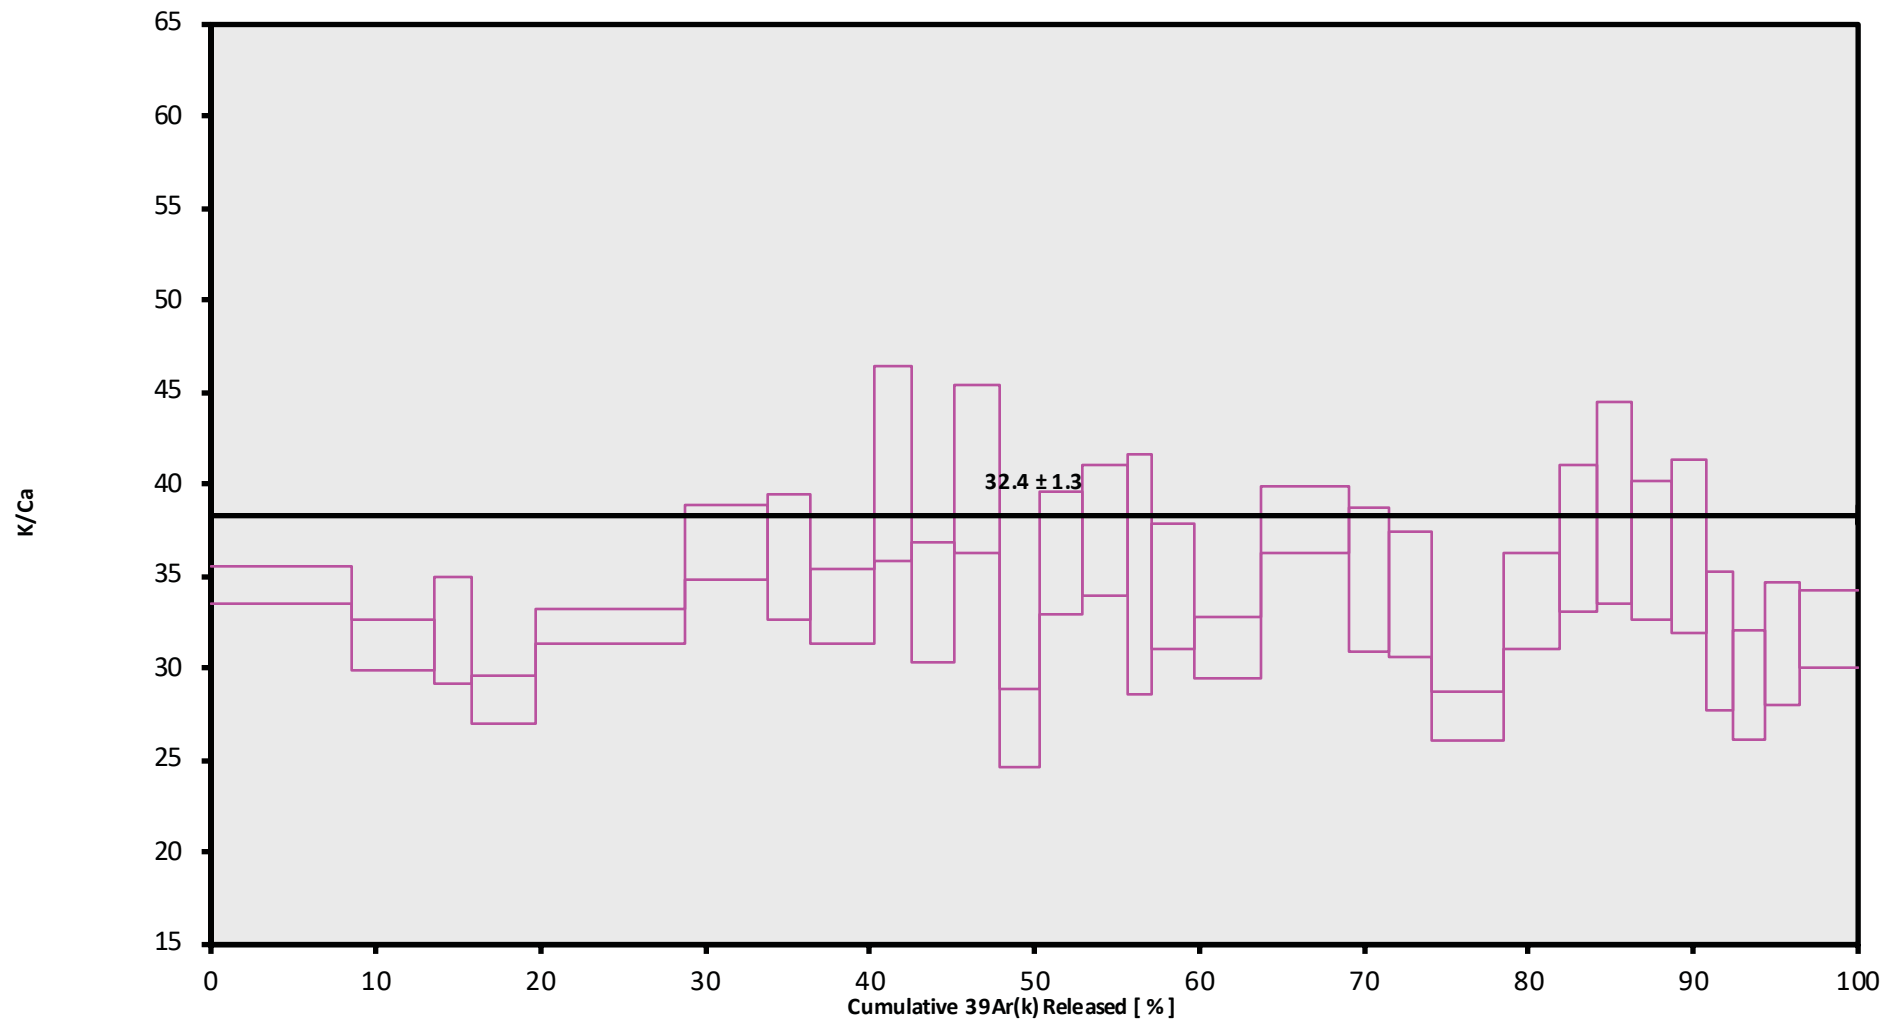

### Ar-Ages in Ma

**WEIGHTED PLATEAU**

**$11.45 \pm 0.04$**

**TOTAL FUSION**

**$11.45 \pm 0.04$**

**NORMAL ISOCHRON**

**$11.46 \pm 0.04$**

**INVERSE ISOCHRON**

**$11.45 \pm 0.04$**

### Sample Info

**Sanidine**

**Rhyolite Dome**

**Dan Miggins**



20F23161.AGE >>> VS19-106 >>> OREGON | SWENTON (20-01) PROJECT

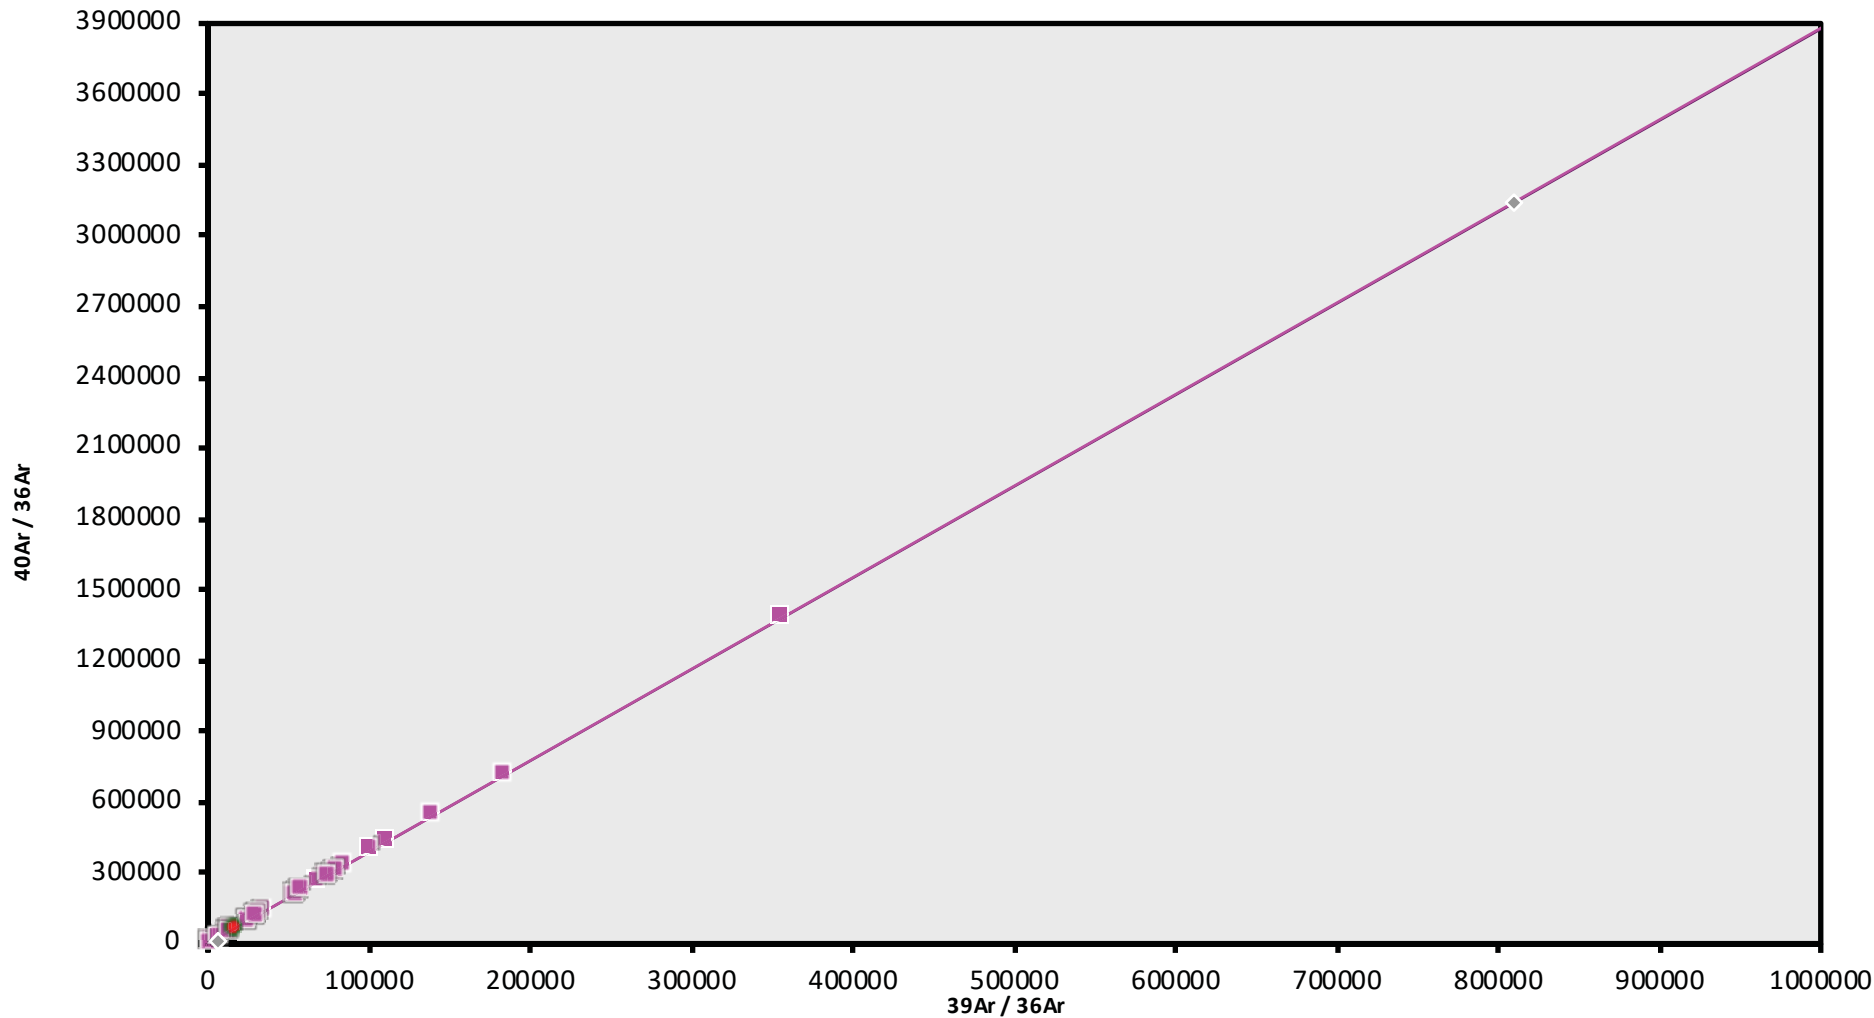

Ar-Ages in Ma

WEIGHTED PLATEAU

$11.45 \pm 0.04$

TOTAL FUSION

$11.45 \pm 0.04$

NORMAL ISOCHRON

$11.46 \pm 0.04$

INVERSE ISOCHRON

$11.45 \pm 0.04$

MSWD (PROBABILITY)

9.57 (0%)

Sample Info

Sanidine

Rhyolite Dome

Dan Miggins

20F23161.AGE >>> VS19-106 >>> OREGON | SWENTON (20-01) PROJECT

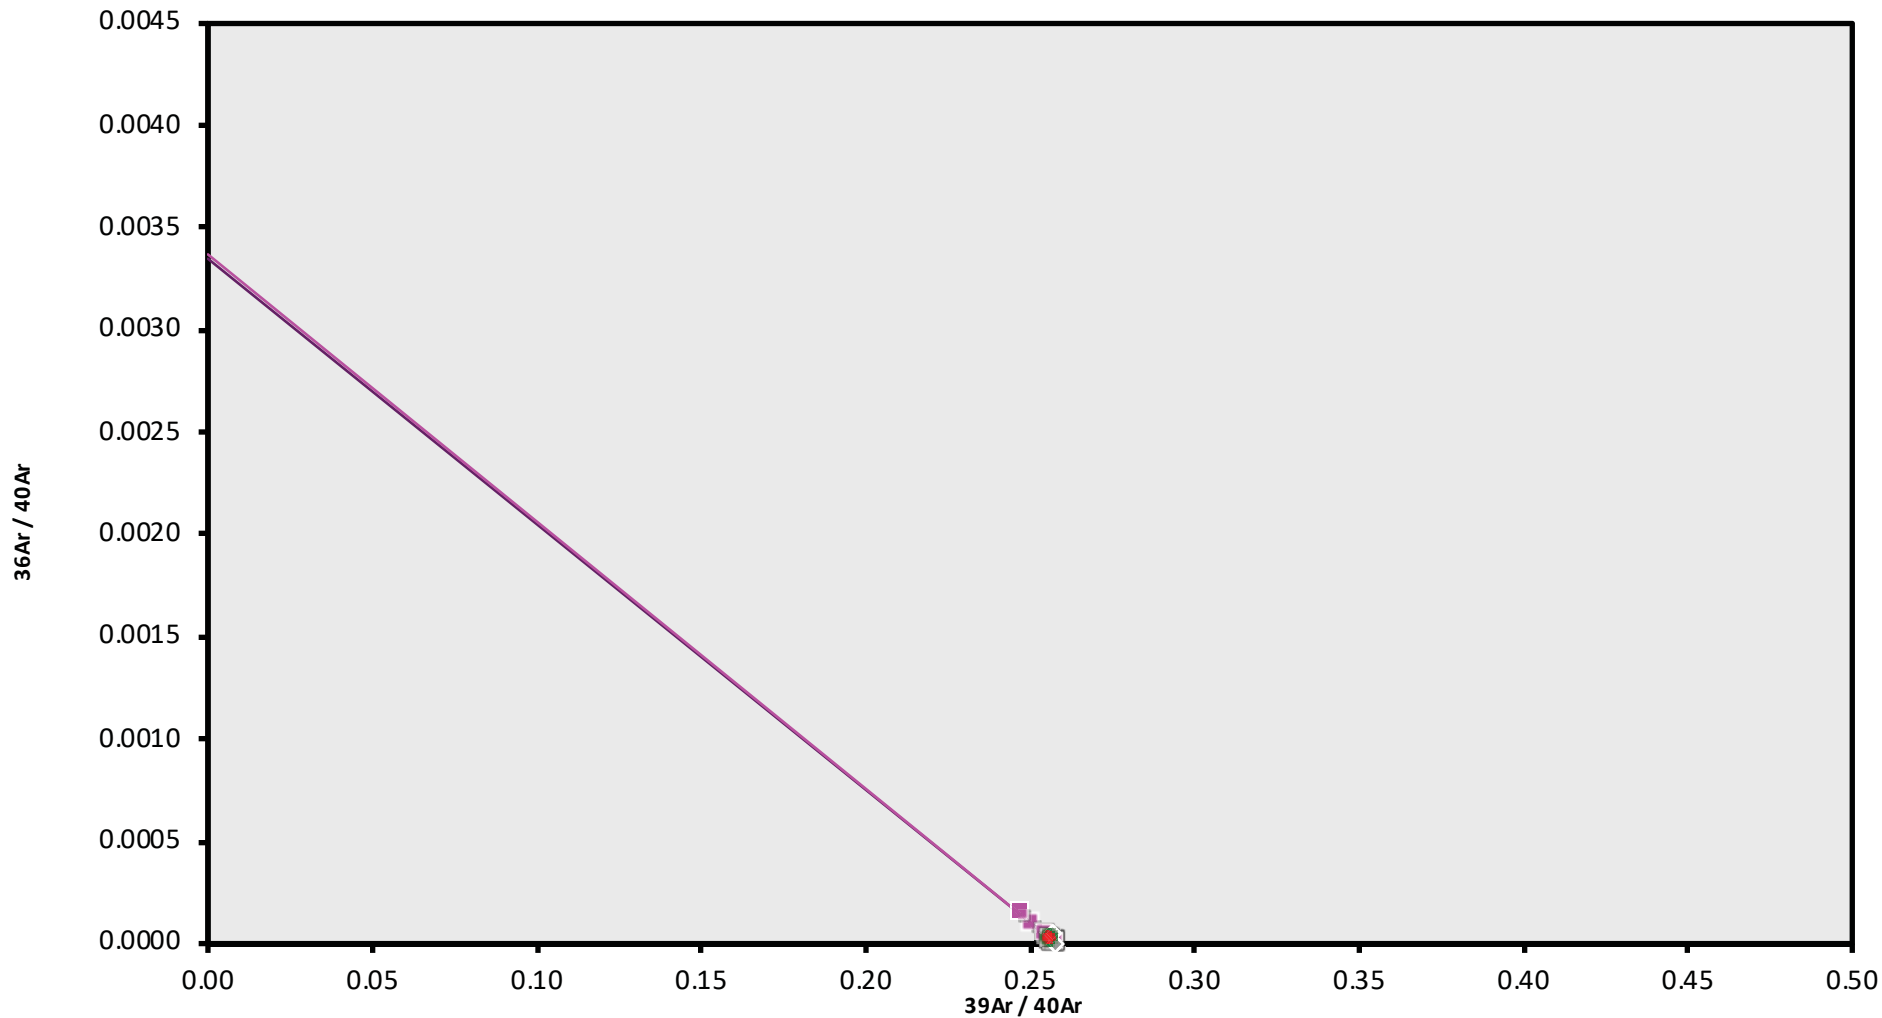

Ar-Ages in Ma

WEIGHTED PLATEAU

$11.45 \pm 0.04$

TOTAL FUSION

$11.45 \pm 0.04$

NORMAL ISOCHRON

$11.46 \pm 0.04$

INVERSE ISOCHRON

$11.45 \pm 0.04$

MSWD (PROBABILITY)

5.26 (0%)

Sample Info

Sanidine

Rhyolite Dome

Dan Miggins

| Relative Abundances |        |   | 36Ar<br>[fA] | %1σ   | 37Ar<br>[fA] | %1σ   | 38Ar<br>[fA] | %1σ   | 39Ar<br>[fA] | %1σ   | 40Ar<br>[fA] | %1σ   | 40(r)/39(k) ± 2σ  | Age ± 2σ<br>(Ma) | 40Ar(r)<br>(%) | 39Ar(k)<br>(%) | K/Ca ± 2σ  |
|---------------------|--------|---|--------------|-------|--------------|-------|--------------|-------|--------------|-------|--------------|-------|-------------------|------------------|----------------|----------------|------------|
| 21F15873            | 24.0 % | ✓ | 0.546992     | 0.247 | 2.26490      | 1.539 | 4.04089      | 0.258 | 327.935      | 0.037 | 972.822      | 0.005 | 2.46848 ± 0.00325 | 7.46 ± 0.01      | 83.21          | 3.02           | 62.3 ± 1.9 |
| 21F15874            | 24.0 % | ✓ | 4.443138     | 0.162 | 4.57906      | 0.867 | 9.05979      | 0.136 | 682.647      | 0.037 | 3000.690     | 0.003 | 2.45238 ± 0.00770 | 7.41 ± 0.02      | 55.79          | 6.30           | 64.1 ± 1.1 |
| 21F15876            | 24.0 % | ✓ | 3.226798     | 0.165 | 3.92866      | 0.943 | 8.14965      | 0.147 | 627.243      | 0.037 | 2506.739     | 0.003 | 2.46043 ± 0.00628 | 7.43 ± 0.02      | 61.57          | 5.78           | 68.7 ± 1.3 |
| 21F15877            | 24.0 % |   | 2.038624     | 0.182 | 66.57671     | 0.242 | 0.96438      | 0.987 | 48.171       | 0.044 | 713.533      | 0.006 | 2.29024 ± 0.05290 | 6.92 ± 0.16      | 15.45          | 0.44           | 0.3 ± 0.0  |
| 21F15879            | 24.0 % | ✓ | 1.648891     | 0.191 | 2.26363      | 1.605 | 5.02184      | 0.195 | 393.355      | 0.037 | 1458.657     | 0.004 | 2.45659 ± 0.00575 | 7.42 ± 0.02      | 66.25          | 3.63           | 74.7 ± 2.4 |
| 21F15880            | 24.0 % | ✓ | 1.267613     | 0.201 | 3.70684      | 0.963 | 8.13738      | 0.137 | 658.840      | 0.037 | 2002.701     | 0.003 | 2.46516 ± 0.00318 | 7.45 ± 0.01      | 81.10          | 6.08           | 76.4 ± 1.5 |
| 21F15882            | 24.0 % | ✓ | 1.262803     | 0.196 | 2.08366      | 1.731 | 3.63636      | 0.275 | 280.350      | 0.037 | 1067.876     | 0.004 | 2.46426 ± 0.00627 | 7.45 ± 0.02      | 64.69          | 2.59           | 57.9 ± 2.0 |
| 21F15883            | 24.0 % | ✓ | 0.754429     | 0.230 | 2.20560      | 1.676 | 4.86988      | 0.199 | 393.160      | 0.037 | 1196.327     | 0.004 | 2.46980 ± 0.00344 | 7.46 ± 0.01      | 81.17          | 3.63           | 76.6 ± 2.6 |
| 21F15885            | 24.0 % | ✓ | 3.159250     | 0.166 | 4.04051      | 0.910 | 8.39908      | 0.141 | 647.530      | 0.037 | 2533.752     | 0.003 | 2.45620 ± 0.00600 | 7.42 ± 0.02      | 62.77          | 5.97           | 68.9 ± 1.3 |
| 21F15886            | 24.0 % | ✓ | 0.749083     | 0.230 | 2.71457      | 1.401 | 5.85959      | 0.195 | 473.833      | 0.037 | 1394.937     | 0.004 | 2.47181 ± 0.00301 | 7.47 ± 0.01      | 83.96          | 4.37           | 75.1 ± 2.1 |
| 21F15888            | 24.0 % | ✓ | 0.993441     | 0.212 | 3.65581      | 0.997 | 7.73168      | 0.154 | 626.770      | 0.037 | 1846.487     | 0.003 | 2.47269 ± 0.00289 | 7.47 ± 0.01      | 83.93          | 5.78           | 73.7 ± 1.5 |
| 21F15889            | 24.0 % | ✓ | 3.171848     | 0.168 | 3.19797      | 1.123 | 6.84257      | 0.161 | 518.700      | 0.037 | 2223.711     | 0.003 | 2.46129 ± 0.00744 | 7.44 ± 0.02      | 57.41          | 4.78           | 69.7 ± 1.6 |
| 21F15891            | 24.0 % |   | 0.185621     | 0.422 | 34.98902     | 0.259 | 0.34485      | 2.682 | 24.729       | 0.059 | 112.357      | 0.022 | 2.41822 ± 0.01978 | 7.31 ± 0.06      | 53.18          | 0.23           | 0.3 ± 0.0  |
| 21F15892            | 24.0 % | ✓ | 0.120946     | 0.528 | 19.15855     | 0.307 | 0.23744      | 3.856 | 17.023       | 0.068 | 76.496       | 0.034 | 2.46447 ± 0.02327 | 7.45 ± 0.07      | 54.80          | 0.16           | 0.4 ± 0.0  |
| 21F15894            | 24.0 % | ✓ | 0.508611     | 0.247 | 1.31273      | 2.745 | 2.76463      | 0.350 | 222.047      | 0.038 | 698.831      | 0.006 | 2.46323 ± 0.00413 | 7.44 ± 0.01      | 78.27          | 2.05           | 72.7 ± 4.0 |
| 21F15895            | 24.0 % | ✓ | 1.374401     | 0.198 | 3.66676      | 0.970 | 5.81045      | 0.191 | 460.892      | 0.037 | 1548.025     | 0.004 | 2.46849 ± 0.00439 | 7.46 ± 0.01      | 73.49          | 4.25           | 54.0 ± 1.0 |
| 21F15897            | 24.0 % |   | 0.164518     | 0.498 | 20.78107     | 0.305 | 0.20659      | 4.379 | 14.606       | 0.082 | 82.157       | 0.028 | 2.37829 ± 0.03461 | 7.19 ± 0.10      | 42.24          | 0.13           | 0.3 ± 0.0  |
| 21F15898            | 24.0 % |   | 0.435371     | 0.277 | 29.77942     | 0.264 | 0.36201      | 2.710 | 23.368       | 0.060 | 187.923      | 0.015 | 2.58373 ± 0.03316 | 7.81 ± 0.10      | 32.10          | 0.22           | 0.3 ± 0.0  |
| 21F15900            | 24.0 % | ✓ | 0.029484     | 1.540 | 0.76970      | 4.966 | 1.72150      | 0.544 | 141.468      | 0.038 | 358.894      | 0.010 | 2.47455 ± 0.00275 | 7.48 ± 0.01      | 97.54          | 1.30           | 79.0 ± 7.9 |
| 21F15901            | 24.0 % | ✓ | 0.018955     | 2.160 | 32.77031     | 0.261 | 0.22986      | 4.159 | 18.986       | 0.067 | 50.123       | 0.050 | 2.48336 ± 0.01360 | 7.50 ± 0.04      | 93.96          | 0.17           | 0.2 ± 0.0  |
| 21F15903            | 24.0 % |   | 0.400205     | 0.295 | 15.92111     | 0.338 | 0.22087      | 4.456 | 11.503       | 0.097 | 145.755      | 0.018 | 2.39697 ± 0.06539 | 7.24 ± 0.20      | 18.90          | 0.11           | 0.3 ± 0.0  |
| 21F15904            | 24.0 % |   | 0.058094     | 0.923 | 15.30602     | 0.339 | 0.14137      | 6.877 | 10.387       | 0.104 | 41.361       | 0.056 | 2.43276 ± 0.03178 | 7.35 ± 0.10      | 61.04          | 0.10           | 0.3 ± 0.0  |
| 21F15906            | 24.0 % | ✓ | 1.958013     | 0.179 | 3.89607      | 1.024 | 7.99231      | 0.147 | 633.849      | 0.037 | 2148.605     | 0.003 | 2.46739 ± 0.00424 | 7.46 ± 0.01      | 72.79          | 5.85           | 70.0 ± 1.4 |
| 21F15907            | 24.0 % | ✓ | 3.228289     | 0.167 | 4.08723      | 0.968 | 8.38992      | 0.143 | 644.630      | 0.037 | 2550.473     | 0.003 | 2.46122 ± 0.00615 | 7.44 ± 0.02      | 62.21          | 5.94           | 67.8 ± 1.3 |
| 21F15909            | 24.0 % | ✓ | 0.420001     | 0.284 | 2.17443      | 1.723 | 4.42997      | 0.221 | 360.321      | 0.037 | 1016.860     | 0.005 | 2.47398 ± 0.00281 | 7.47 ± 0.01      | 87.66          | 3.32           | 71.3 ± 2.5 |
| 21F15910            | 24.0 % | ✓ | 0.147314     | 0.486 | 1.16949      | 3.129 | 2.73596      | 0.365 | 224.766      | 0.038 | 600.244      | 0.006 | 2.47467 ± 0.00272 | 7.48 ± 0.01      | 92.67          | 2.07           | 82.6 ± 5.2 |
| 21F15912            | 24.0 % | ✓ | 0.278745     | 0.336 | 0.96935      | 3.807 | 2.13474      | 0.471 | 173.392      | 0.038 | 511.810      | 0.007 | 2.47164 ± 0.00389 | 7.47 ± 0.01      | 83.73          | 1.60           | 76.9 ± 5.9 |
| 21F15913            | 24.0 % | ✓ | 5.353521     | 0.160 | 3.80702      | 1.030 | 8.64293      | 0.143 | 632.759      | 0.037 | 3145.515     | 0.003 | 2.44500 ± 0.00980 | 7.39 ± 0.03      | 49.18          | 5.84           | 71.5 ± 1.5 |
| 21F15915            | 24.0 % | ✓ | 0.541153     | 0.268 | 4.63579      | 0.845 | 8.40527      | 0.143 | 690.293      | 0.037 | 1869.843     | 0.004 | 2.47466 ± 0.00228 | 7.48 ± 0.01      | 91.36          | 6.37           | 64.0 ± 1.1 |
| 21F15916            | 24.0 % | ✓ | 2.066454     | 0.184 | 6.91121      | 0.631 | 10.71276     | 0.118 | 860.073      | 0.037 | 2739.312     | 0.003 | 2.46769 ± 0.00354 | 7.46 ± 0.01      | 77.48          | 7.93           | 53.5 ± 0.7 |
| Σ                   |        |   | 40.552604    | 0.045 | 303.32320    | 0.100 | 138.19651    | 0.042 | 10843.623    | 0.008 | 38802.814    | 0.001 |                   |                  |                |                |            |

| Information on Analysis and Constants Used in Calculations |  |
|------------------------------------------------------------|--|
| Project = <b>SWENTON (20-01)</b>                           |  |
| Sample = <b>VS19-109</b>                                   |  |
| Material = <b>Sanidine</b>                                 |  |
| Location = <b>N of Drewsey</b>                             |  |
| Region = <b>Eastern Oregon</b>                             |  |
| Analyst = <b>Dan Miggins</b>                               |  |
| Irradiation = <b>21-OSU-04 (4X3-21)</b>                    |  |
| Position = <b>X: 0   Y: 0   Z/H: 2.219184 mm</b>           |  |
| FCT-NM Age = <b>28.201 ± 0.023 Ma</b>                      |  |
| FCT-NM Reference = <b>Kuiper et al (2008)</b>              |  |
| FCT-NM 40Ar/39Ar Ratio = <b>9.38682 ± 0.01061</b>          |  |
| FCT-NM J-value = <b>0.00165397 ± 0.00000187</b>            |  |
| Air Shot 40Ar/36Ar = <b>301.1360 ± 0.3132</b>              |  |
| Air Shot MDF = <b>0.99785867 ± 0.00036502 (LIN)</b>        |  |
| Experiment Type = <b>Total Fusion</b>                      |  |
| Extraction Method = <b>Single Crystal Laser Heating</b>    |  |
| Heating = <b>62 sec</b>                                    |  |
| Isolation = <b>1.50 min</b>                                |  |
| Instrument = <b>ARGUS-VI-F</b>                             |  |
| Preferred Age = <b>Ideogram Age</b>                        |  |
| Age Classification = <b>Eruption Age</b>                   |  |
| IGSN = <b>Undefined</b>                                    |  |
| Rock Class = <b>Undefined</b>                              |  |
| Lithology = <b>Undefined</b>                               |  |
| Lat-Lon = <b>Undefined - Undefined</b>                     |  |

Age Equations = **Min et al. (2000)**  
Negative Intensities = **Allowed**  
Collector Calibrations = **36Ar**  
Decay 40K = **5.463 ± 0.107 E-10 1/a**  
Decay 39Ar = **2.940 ± 0.016 E-07 1/h**  
Decay 37Ar = **8.230 ± 0.012 E-04 1/h**  
Decay 36Cl = **2.257 ± 0.015 E-06 1/a**  
Decay 40K(EC,β<sup>+</sup>) = **0.580 ± 0.014 E-10 1/a**  
Decay 40K(β<sup>-</sup>) = **4.884 ± 0.099 E-10 1/a**  
Atmospheric 40/36(a) = **298.56 ± 0.31**  
Atmospheric 38/36(a) = **0.1885 ± 0.0003**  
Production 39/37(ca) = **0.0006425 ± 0.0000059**  
Production 38/37(ca) = **0.0001800 ± 0.0000173**  
Production 36/37(ca) = **0.0002703 ± 0.0000005**  
Production 40/39(k) = **0.000607 ± 0.000059**  
Production 38/39(k) = **0.012077 ± 0.000011**  
Production 36/38(cl) = **262.80 ± 1.71**  
Scaling Ratio K/Ca = **0.430**  
Abundance Ratio 40K/K = **1.1700 ± 0.0100 E-04**  
Atomic Weight K = **39.0983 ± 0.0001 g**

| Results          | 40(a)/36(a) ± 2σ         | 40(r)/39(k) ± 2σ             | Age ± 2σ<br>(Ma)       | MSWD         | 39Ar(k)<br>(%,n)     | K/Ca ± 2σ  |
|------------------|--------------------------|------------------------------|------------------------|--------------|----------------------|------------|
| Age Plateau      |                          |                              |                        |              |                      |            |
| Error Mean       |                          | 2.46985 ± 0.00232<br>± 0.09% | 7.46 ± 0.02<br>± 0.24% | 8.60<br>0%   | 98.78<br>24          | 63.8 ± 8.5 |
|                  |                          | Full External Error ± 0.39   |                        | 1.59         | 2σ Confidence Limit  |            |
|                  |                          | Analytical Error ± 0.01      |                        | 2.9319       | Error Magnification  |            |
| Total Fusion Age |                          | 2.46355 ± 0.00125<br>± 0.05% | 7.44 ± 0.02<br>± 0.23% |              | 30                   | 15.4 ± 0.0 |
|                  |                          | Full External Error ± 0.39   |                        |              |                      |            |
|                  |                          | Analytical Error ± 0.00      |                        |              |                      |            |
| Normal Isochron  | 295.12 ± 0.67<br>± 0.23% | 2.47630 ± 0.00170<br>± 0.07% | 7.48 ± 0.02<br>± 0.24% | 1.93<br>1%   | 98.78<br>24          |            |
| Error Chron      |                          | Full External Error ± 0.39   |                        | 1.60         | 2σ Confidence Limit  |            |
|                  |                          | Analytical Error ± 0.01      |                        | 1.3885       | Error Magnification  |            |
|                  |                          |                              |                        | 1            | Number of Iterations |            |
|                  |                          |                              |                        | 0.0000000451 | Convergence          |            |
| Inverse Isochron | 295.12 ± 0.67<br>± 0.23% | 2.47633 ± 0.00170<br>± 0.07% | 7.48 ± 0.02<br>± 0.24% | 1.93<br>1%   | 98.78<br>24          |            |
| Error Chron      |                          | Full External Error ± 0.39   |                        | 1.60         | 2σ Confidence Limit  |            |
|                  |                          | Analytical Error ± 0.01      |                        | 1.3885       | Error Magnification  |            |
|                  |                          |                              |                        | 2            | Number of Iterations |            |
|                  |                          |                              |                        | 0.0000096194 | Convergence          |            |
|                  |                          |                              |                        | 48%          | Spreading Factor     |            |

| Incremental Heating |        |   | 36Ar(a)<br>[fA] | 37Ar(ca)<br>[fA] | 38Ar(cl)<br>[fA] | 39Ar(k)<br>[fA] | 40Ar(r)<br>[fA] | Age ± 2σ<br>(Ma) | 40Ar(r)<br>(%) | 39Ar(k)<br>(%) | K/Ca ± 2σ  |
|---------------------|--------|---|-----------------|------------------|------------------|-----------------|-----------------|------------------|----------------|----------------|------------|
| 21F15873            | 24.0 % | ✓ | 0.546380        | 2.26490          | 0.0000000        | 327.933         | 809.496         | 7.46 ± 0.01      | 83.21          | 3.02           | 62.3 ± 1.9 |
| 21F15874            | 24.0 % | ✓ | 4.441901        | 4.57906          | 0.0000000        | 682.644         | 1674.102        | 7.41 ± 0.02      | 55.79          | 6.30           | 64.1 ± 1.1 |
| 21F15876            | 24.0 % | ✓ | 3.225736        | 3.92866          | 0.0000000        | 627.240         | 1543.282        | 7.43 ± 0.02      | 61.57          | 5.78           | 68.7 ± 1.3 |
| 21F15877            | 24.0 % |   | 2.020628        | 66.57671         | 0.0000000        | 48.128          | 110.225         | 6.92 ± 0.16      | 15.45          | 0.44           | 0.3 ± 0.0  |
| 21F15879            | 24.0 % | ✓ | 1.648279        | 2.26363          | 0.0000000        | 393.354         | 966.308         | 7.42 ± 0.02      | 66.25          | 3.63           | 74.7 ± 2.4 |
| 21F15880            | 24.0 % | ✓ | 1.266611        | 3.70684          | 0.0000000        | 658.837         | 1624.142        | 7.45 ± 0.01      | 81.10          | 6.08           | 76.4 ± 1.5 |
| 21F15882            | 24.0 % | ✓ | 1.262238        | 2.08366          | 0.0122872        | 280.348         | 690.852         | 7.45 ± 0.02      | 64.69          | 2.59           | 57.9 ± 2.0 |
| 21F15883            | 24.0 % | ✓ | 0.753832        | 2.20560          | 0.0000000        | 393.158         | 971.024         | 7.46 ± 0.01      | 81.17          | 3.63           | 76.6 ± 2.6 |
| 21F15885            | 24.0 % | ✓ | 3.158158        | 4.04051          | 0.0000000        | 647.527         | 1590.459        | 7.42 ± 0.02      | 62.77          | 5.97           | 68.9 ± 1.3 |
| 21F15886            | 24.0 % | ✓ | 0.748349        | 2.71457          | 0.0000000        | 473.831         | 1171.222        | 7.47 ± 0.01      | 83.96          | 4.37           | 75.1 ± 2.1 |
| 21F15888            | 24.0 % | ✓ | 0.992453        | 3.65581          | 0.0000000        | 626.768         | 1549.800        | 7.47 ± 0.01      | 83.93          | 5.78           | 73.7 ± 1.5 |
| 21F15889            | 24.0 % | ✓ | 3.170983        | 3.19797          | 0.0000000        | 518.698         | 1276.667        | 7.44 ± 0.02      | 57.41          | 4.78           | 69.7 ± 1.6 |
| 21F15891            | 24.0 % |   | 0.176162        | 34.98902         | 0.0069632        | 24.707          | 59.747          | 7.31 ± 0.06      | 53.18          | 0.23           | 0.3 ± 0.0  |
| 21F15892            | 24.0 % | ✓ | 0.115767        | 19.15855         | 0.0067280        | 17.011          | 41.922          | 7.45 ± 0.07      | 54.80          | 0.16           | 0.4 ± 0.0  |
| 21F15894            | 24.0 % | ✓ | 0.508256        | 1.31273          | 0.0000000        | 222.046         | 546.951         | 7.44 ± 0.01      | 78.27          | 2.05           | 72.7 ± 4.0 |
| 21F15895            | 24.0 % | ✓ | 1.373409        | 3.66676          | 0.0000000        | 460.889         | 1137.701        | 7.46 ± 0.01      | 73.49          | 4.25           | 54.0 ± 1.0 |
| 21F15897            | 24.0 % |   | 0.158901        | 20.78107         | 0.0000000        | 14.593          | 34.706          | 7.19 ± 0.10      | 42.24          | 0.13           | 0.3 ± 0.0  |
| 21F15898            | 24.0 % |   | 0.427322        | 29.77942         | 0.0000000        | 23.349          | 60.327          | 7.81 ± 0.10      | 32.10          | 0.22           | 0.3 ± 0.0  |
| 21F15900            | 24.0 % | ✓ | 0.029275        | 0.76970          | 0.0073460        | 141.467         | 350.068         | 7.48 ± 0.01      | 97.54          | 1.30           | 79.0 ± 7.9 |
| 21F15901            | 24.0 % | ✓ | 0.010097        | 32.77031         | 0.0000000        | 18.965          | 47.097          | 7.50 ± 0.04      | 93.96          | 0.17           | 0.2 ± 0.0  |
| 21F15903            | 24.0 % |   | 0.395901        | 15.92111         | 0.0045774        | 11.493          | 27.548          | 7.24 ± 0.20      | 18.90          | 0.11           | 0.3 ± 0.0  |
| 21F15904            | 24.0 % |   | 0.053957        | 15.30602         | 0.0031219        | 10.377          | 25.245          | 7.35 ± 0.10      | 61.04          | 0.10           | 0.3 ± 0.0  |
| 21F15906            | 24.0 % | ✓ | 1.956960        | 3.89607          | 0.0000000        | 633.847         | 1563.950        | 7.46 ± 0.01      | 72.79          | 5.85           | 70.0 ± 1.4 |
| 21F15907            | 24.0 % | ✓ | 3.227184        | 4.08723          | 0.0000000        | 644.628         | 1586.573        | 7.44 ± 0.02      | 62.21          | 5.94           | 67.8 ± 1.3 |
| 21F15909            | 24.0 % | ✓ | 0.419413        | 2.17443          | 0.0000000        | 360.319         | 891.421         | 7.47 ± 0.01      | 87.66          | 3.32           | 71.3 ± 2.5 |
| 21F15910            | 24.0 % | ✓ | 0.146998        | 1.16949          | 0.0000000        | 224.765         | 556.220         | 7.48 ± 0.01      | 92.67          | 2.07           | 82.6 ± 5.2 |
| 21F15912            | 24.0 % | ✓ | 0.278483        | 0.96935          | 0.0000000        | 173.391         | 428.561         | 7.47 ± 0.01      | 83.73          | 1.60           | 76.9 ± 5.9 |
| 21F15913            | 24.0 % | ✓ | 5.352492        | 3.80702          | 0.0000000        | 632.756         | 1547.090        | 7.39 ± 0.03      | 49.18          | 5.84           | 71.5 ± 1.5 |
| 21F15915            | 24.0 % | ✓ | 0.539900        | 4.63579          | 0.0000000        | 690.290         | 1708.232        | 7.48 ± 0.01      | 91.36          | 6.37           | 64.0 ± 1.1 |
| 21F15916            | 24.0 % | ✓ | 2.064586        | 6.91121          | 0.0000000        | 860.069         | 2122.387        | 7.46 ± 0.01      | 77.48          | 7.93           | 53.5 ± 0.7 |
| Σ                   |        |   | 40.470611       | 303.32320        | 0.0410237        | 10843.429       | 26713.327       |                  |                |                |            |

| Information on Analysis                                                                                                                                                                                                                                                                                              | Results                 | 40(r)/39(k) ± 2σ             | Age ± 2σ<br>(Ma)                                      | MSWD           | 39Ar(k)<br>(%,n)                           | K/Ca ± 2σ  |
|----------------------------------------------------------------------------------------------------------------------------------------------------------------------------------------------------------------------------------------------------------------------------------------------------------------------|-------------------------|------------------------------|-------------------------------------------------------|----------------|--------------------------------------------|------------|
| Project = <b>SWENTON (20-01)</b><br>Sample = <b>VS19-109</b><br>Material = <b>Sanidine</b><br>Location = <b>N of Drewsey</b><br>Region = <b>Eastern Oregon</b><br>Analyst = <b>Dan Miggins</b><br>Irradiation = <b>21-OSU-04 (4X3-21)</b><br>J = <b>0.00165397 ± 0.00000187</b><br>FCT-NM = <b>28.201 ± 0.023 Ma</b> | <b>Age Plateau</b>      | 2.46985 ± 0.00232            | <b>7.46 ± 0.02</b>                                    | 8.60           | 98.78                                      | 63.8 ± 8.5 |
|                                                                                                                                                                                                                                                                                                                      | <b>Error Mean</b>       | ± 0.09%                      | <b>± 0.24%</b>                                        | 0%             | 24                                         |            |
|                                                                                                                                                                                                                                                                                                                      |                         |                              | Full External Error ± 0.39<br>Analytical Error ± 0.01 | 1.59<br>2.9319 | 2σ Confidence Limit<br>Error Magnification |            |
|                                                                                                                                                                                                                                                                                                                      | <b>Total Fusion Age</b> | 2.46355 ± 0.00125<br>± 0.05% | <b>7.44 ± 0.02</b><br><b>± 0.23%</b>                  |                | 30                                         | 15.4 ± 0.0 |
|                                                                                                                                                                                                                                                                                                                      |                         |                              | Full External Error ± 0.39<br>Analytical Error ± 0.00 |                |                                            |            |

| Normal Isochron |        |   | 39(k)/36(a) ± 2σ | 40(a+r)/36(a) ± 2σ | r.i.   |
|-----------------|--------|---|------------------|--------------------|--------|
| 21F15873        | 24.0 % | ✓ | 600.19 ± 3.00    | 1780.12 ± 8.79     | 0.9886 |
| 21F15874        | 24.0 % | ✓ | 153.68 ± 0.51    | 675.45 ± 2.19      | 0.9748 |
| 21F15876        | 24.0 % | ✓ | 194.45 ± 0.66    | 776.99 ± 2.57      | 0.9759 |
| 21F15877        | 24.0 % |   | 23.82 ± 0.09     | 353.11 ± 1.30      | 0.9723 |
| 21F15879        | 24.0 % | ✓ | 238.65 ± 0.93    | 884.81 ± 3.38      | 0.9812 |
| 21F15880        | 24.0 % | ✓ | 520.16 ± 2.13    | 1580.83 ± 6.37     | 0.9835 |
| 21F15882        | 24.0 % | ✓ | 222.10 ± 0.89    | 845.88 ± 3.32      | 0.9820 |
| 21F15883        | 24.0 % | ✓ | 521.55 ± 2.43    | 1586.68 ± 7.31     | 0.9870 |
| 21F15885        | 24.0 % | ✓ | 205.03 ± 0.70    | 802.16 ± 2.67      | 0.9760 |
| 21F15886        | 24.0 % | ✓ | 633.17 ± 2.95    | 1863.63 ± 8.58     | 0.9872 |
| 21F15888        | 24.0 % | ✓ | 631.53 ± 2.72    | 1860.15 ± 7.89     | 0.9850 |
| 21F15889        | 24.0 % | ✓ | 163.58 ± 0.56    | 701.17 ± 2.35      | 0.9763 |
| 21F15891        | 24.0 % |   | 140.25 ± 1.26    | 637.72 ± 5.69      | 0.9900 |
| 21F15892        | 24.0 % | ✓ | 146.94 ± 1.63    | 660.69 ± 7.31      | 0.9906 |
| 21F15894        | 24.0 % | ✓ | 436.88 ± 2.19    | 1374.69 ± 6.80     | 0.9882 |
| 21F15895        | 24.0 % | ✓ | 335.58 ± 1.35    | 1126.94 ± 4.46     | 0.9828 |
| 21F15897        | 24.0 % |   | 91.84 ± 0.96     | 516.98 ± 5.35      | 0.9862 |
| 21F15898        | 24.0 % |   | 54.64 ± 0.32     | 439.74 ± 2.49      | 0.9771 |
| 21F15900        | 24.0 % | ✓ | 4832.30 ± 150.03 | 12256.35 ± 380.42  | 0.9997 |
| 21F15901        | 24.0 % | ✓ | 1878.28 ± 152.69 | 4963.00 ± 403.43   | 0.9998 |
| 21F15903        | 24.0 % |   | 29.03 ± 0.18     | 368.14 ± 2.20      | 0.9492 |
| 21F15904        | 24.0 % |   | 192.32 ± 3.85    | 766.44 ± 15.27     | 0.9930 |
| 21F15906        | 24.0 % | ✓ | 323.89 ± 1.18    | 1097.73 ± 3.93     | 0.9792 |
| 21F15907        | 24.0 % | ✓ | 199.75 ± 0.68    | 790.19 ± 2.63      | 0.9762 |
| 21F15909        | 24.0 % | ✓ | 859.10 ± 4.92    | 2423.96 ± 13.78    | 0.9915 |
| 21F15910        | 24.0 % | ✓ | 1529.04 ± 14.95  | 4082.43 ± 39.79    | 0.9969 |
| 21F15912        | 24.0 % | ✓ | 622.63 ± 4.21    | 1837.47 ± 12.36    | 0.9934 |
| 21F15913        | 24.0 % | ✓ | 118.22 ± 0.39    | 587.60 ± 1.88      | 0.9742 |
| 21F15915        | 24.0 % | ✓ | 1278.55 ± 6.93   | 3462.54 ± 18.58    | 0.9905 |
| 21F15916        | 24.0 % | ✓ | 416.58 ± 1.56    | 1326.56 ± 4.88     | 0.9804 |

| Results         | 40(a)/36(a) ± 2σ      | 40(r)/39(k) ± 2σ  | Age ± 2σ (Ma)              | MSWD            |
|-----------------|-----------------------|-------------------|----------------------------|-----------------|
| Normal Isochron | 295.12 ± 0.67         | 2.47630 ± 0.00170 | 7.48 ± 0.02                | 1.93            |
| Error Chron     | ± 0.23%               | ± 0.07%           | ± 0.24%                    | 1%              |
|                 |                       |                   | Full External Error ± 0.39 |                 |
|                 |                       |                   | Analytical Error ± 0.01    |                 |
| Statistics      | 2σ Confidence Limit   | 1.60              | Convergence                | 0.000000045067  |
|                 | Error Magnification   | 1.3885            | Number of Iterations       | 1               |
|                 | Number of Data Points | 24                | Calculated Line            | Weighted York-2 |

| Inverse Isochron |        |   | 39(k)/40(a+r) ± 2σ    | 36(a)/40(a+r) ± 2σ      | r.i.   |
|------------------|--------|---|-----------------------|-------------------------|--------|
| 21F15873         | 24.0 % | ✓ | 0.3371635 ± 0.0002531 | 0.00056176 ± 0.00000277 | 0.0031 |
| 21F15874         | 24.0 % | ✓ | 0.2275270 ± 0.0001685 | 0.00148050 ± 0.00000479 | 0.0015 |
| 21F15876         | 24.0 % | ✓ | 0.2502596 ± 0.0001854 | 0.00128702 ± 0.00000426 | 0.0022 |
| 21F15877         | 24.0 % |   | 0.0674532 ± 0.0000595 | 0.00283198 ± 0.00001039 | 0.0040 |
| 21F15879         | 24.0 % | ✓ | 0.2697124 ± 0.0002028 | 0.00113018 ± 0.00000432 | 0.0027 |
| 21F15880         | 24.0 % | ✓ | 0.3290399 ± 0.0002435 | 0.00063258 ± 0.00000255 | 0.0016 |
| 21F15882         | 24.0 % | ✓ | 0.2625708 ± 0.0001982 | 0.00118220 ± 0.00000465 | 0.0029 |
| 21F15883         | 24.0 % | ✓ | 0.3287036 ± 0.0002461 | 0.00063025 ± 0.00000290 | 0.0025 |
| 21F15885         | 24.0 % | ✓ | 0.2556004 ± 0.0001895 | 0.00124663 ± 0.00000415 | 0.0021 |
| 21F15886         | 24.0 % | ✓ | 0.3397493 ± 0.0002530 | 0.00053659 ± 0.00000247 | 0.0021 |
| 21F15888         | 24.0 % | ✓ | 0.3395080 ± 0.0002520 | 0.00053759 ± 0.00000228 | 0.0019 |
| 21F15889         | 24.0 % | ✓ | 0.2332907 ± 0.0001735 | 0.00142619 ± 0.00000479 | 0.0020 |
| 21F15891         | 24.0 % |   | 0.2199266 ± 0.0002789 | 0.00156809 ± 0.00001398 | 0.0172 |
| 21F15892         | 24.0 % | ✓ | 0.2224033 ± 0.0003386 | 0.00151358 ± 0.00001674 | 0.0277 |
| 21F15894         | 24.0 % | ✓ | 0.3178007 ± 0.0002436 | 0.00072744 ± 0.00000360 | 0.0044 |
| 21F15895         | 24.0 % | ✓ | 0.2977811 ± 0.0002217 | 0.00088736 ± 0.00000351 | 0.0023 |
| 21F15897         | 24.0 % |   | 0.1776432 ± 0.0003071 | 0.00193433 ± 0.00002000 | 0.0181 |
| 21F15898         | 24.0 % |   | 0.1242569 ± 0.0001527 | 0.00227409 ± 0.00001288 | 0.0130 |
| 21F15900         | 24.0 % | ✓ | 0.3942693 ± 0.0003131 | 0.00008159 ± 0.00000253 | 0.0016 |
| 21F15901         | 24.0 % | ✓ | 0.3784569 ± 0.0006295 | 0.00020149 ± 0.00001638 | 0.0073 |
| 21F15903         | 24.0 % |   | 0.0788532 ± 0.0001560 | 0.00271634 ± 0.00001626 | 0.0114 |
| 21F15904         | 24.0 % |   | 0.2509325 ± 0.0005931 | 0.00130473 ± 0.00002600 | 0.0269 |
| 21F15906         | 24.0 % | ✓ | 0.2950567 ± 0.0002188 | 0.00091097 ± 0.00000326 | 0.0020 |
| 21F15907         | 24.0 % | ✓ | 0.2527871 ± 0.0001873 | 0.00126552 ± 0.00000422 | 0.0018 |
| 21F15909         | 24.0 % | ✓ | 0.3544214 ± 0.0002651 | 0.00041255 ± 0.00000235 | 0.0025 |
| 21F15910         | 24.0 % | ✓ | 0.3745417 ± 0.0002868 | 0.00024495 ± 0.00000239 | 0.0022 |
| 21F15912         | 24.0 % | ✓ | 0.3388499 ± 0.0002623 | 0.00054423 ± 0.00000366 | 0.0041 |
| 21F15913         | 24.0 % | ✓ | 0.2011860 ± 0.0001489 | 0.00170183 ± 0.00000544 | 0.0017 |
| 21F15915         | 24.0 % | ✓ | 0.3692525 ± 0.0002746 | 0.00028881 ± 0.00000155 | 0.0018 |
| 21F15916         | 24.0 % | ✓ | 0.3140324 ± 0.0002318 | 0.00075383 ± 0.00000277 | 0.0017 |

| Results          | 40(a)/36(a) ± 2σ      | 40(r)/39(k) ± 2σ  | Age ± 2σ (Ma)              | MSWD            |
|------------------|-----------------------|-------------------|----------------------------|-----------------|
| Inverse Isochron | 295.12 ± 0.67         | 2.47633 ± 0.00170 | 7.48 ± 0.02                | 1.93            |
| Error Chron      | ± 0.23%               | ± 0.07%           | ± 0.24%                    | 1%              |
|                  |                       |                   | Full External Error ± 0.39 |                 |
|                  |                       |                   | Analytical Error ± 0.01    |                 |
| Statistics       | 2σ Confidence Limit   | 1.60              | Convergence                | 0.0000096194    |
|                  | Error Magnification   | 1.3885            | Number of Iterations       | 2               |
|                  | Number of Data Points | 24                | Calculated Line            | Weighted York-2 |
|                  | Spreading Factor      | 47.8%             |                            |                 |

| Degassing Patterns |        |   | 36Ar(a)<br>[fA] | %1σ  | 36Ar(c)<br>[fA] | %1σ  | 36Ar(ca)<br>[fA] | %1σ  | 36Ar(cl)<br>[fA] | %1σ    | 37Ar(ca)<br>[fA] | %1σ  | 38Ar(a)<br>[fA] | %1σ  | 38Ar(c)<br>[fA] | %1σ  | 38Ar(k)<br>[fA] | %1σ  | 38Ar(ca)<br>[fA] | %1σ   | 38Ar(cl)<br>[fA] | %1σ    | 39Ar(k)<br>[fA] | %1σ  | 39Ar(ca)<br>[fA] | %1σ  | 40Ar(r)<br>[fA] | %1σ  | 40Ar(a)<br>[fA] | %1σ  | 40Ar(c)<br>[fA] | %1σ  | 40Ar(k)<br>[fA] | %1σ  |
|--------------------|--------|---|-----------------|------|-----------------|------|------------------|------|------------------|--------|------------------|------|-----------------|------|-----------------|------|-----------------|------|------------------|-------|------------------|--------|-----------------|------|------------------|------|-----------------|------|-----------------|------|-----------------|------|-----------------|------|
| 21F15873           | 24.0 % | ✓ | 0.546380        | 0.25 | 0.0000000       | 0.00 | 0.0006122        | 1.55 | 0.0000000        | 0.00   | 2.26490          | 1.54 | 0.1029926       | 0.29 | 0.0000000       | 0.00 | 3.96045         | 0.10 | 0.0004077        | 9.75  | 0.0000000        | 0.00   | 327.933         | 0.04 | 0.0014552        | 1.79 | 809.496         | 0.05 | 163.127         | 0.27 | 0.0000000       | 0.00 | 0.1990554       | 9.65 |
| 21F15874           | 24.0 % | ✓ | 4.441901        | 0.16 | 0.0000000       | 0.00 | 0.0012377        | 0.88 | 0.0000000        | 0.00   | 4.57906          | 0.87 | 0.8372982       | 0.23 | 0.0000000       | 0.00 | 8.24429         | 0.10 | 0.0008242        | 9.67  | 0.0000000        | 0.00   | 682.644         | 0.04 | 0.0029420        | 1.26 | 1674.102        | 0.15 | 1326.174        | 0.19 | 0.0000000       | 0.00 | 0.4143648       | 9.65 |
| 21F15876           | 24.0 % | ✓ | 3.225736        | 0.17 | 0.0000000       | 0.00 | 0.0010619        | 0.96 | 0.0000000        | 0.00   | 3.92866          | 0.94 | 0.6080512       | 0.23 | 0.0000000       | 0.00 | 7.57518         | 0.10 | 0.0007072        | 9.68  | 0.0000000        | 0.00   | 627.240         | 0.04 | 0.0025242        | 1.32 | 1543.282        | 0.12 | 963.076         | 0.20 | 0.0000000       | 0.00 | 0.3807347       | 9.65 |
| 21F15877           | 24.0 % |   | 2.020628        | 0.18 | 0.0000000       | 0.00 | 0.0179957        | 0.30 | 0.0000000        | 0.00   | 66.57671         | 0.24 | 0.3808884       | 0.24 | 0.0000000       | 0.00 | 0.58124         | 0.10 | 0.0119838        | 9.63  | 0.0000000        | 0.00   | 48.128          | 0.04 | 0.0427755        | 0.95 | 110.225         | 1.15 | 603.279         | 0.21 | 0.0000000       | 0.00 | 0.0292138       | 9.65 |
| 21F15879           | 24.0 % | ✓ | 1.648279        | 0.19 | 0.0000000       | 0.00 | 0.0006119        | 1.61 | 0.0000000        | 0.00   | 2.26363          | 1.60 | 0.3107006       | 0.25 | 0.0000000       | 0.00 | 4.75053         | 0.10 | 0.0004075        | 9.76  | 0.0000000        | 0.00   | 393.354         | 0.04 | 0.0014544        | 1.85 | 966.308         | 0.11 | 492.110         | 0.22 | 0.0000000       | 0.00 | 0.2387656       | 9.65 |
| 21F15880           | 24.0 % | ✓ | 1.266611        | 0.20 | 0.0000000       | 0.00 | 0.0010020        | 0.98 | 0.0000000        | 0.00   | 3.70684          | 0.96 | 0.2387562       | 0.26 | 0.0000000       | 0.00 | 7.95678         | 0.10 | 0.0006672        | 9.68  | 0.0000000        | 0.00   | 658.837         | 0.04 | 0.0023816        | 1.33 | 1624.142        | 0.05 | 378.159         | 0.23 | 0.0000000       | 0.00 | 0.3999141       | 9.65 |
| 21F15882           | 24.0 % | ✓ | 1.262238        | 0.20 | 0.0000000       | 0.00 | 0.0005632        | 1.74 | 0.0000014        | 107.25 | 2.08366          | 1.73 | 0.2379319       | 0.25 | 0.0000000       | 0.00 | 3.38577         | 0.10 | 0.0003751        | 9.78  | 0.0122872        | 107.25 | 280.348         | 0.04 | 0.0013388        | 1.96 | 690.852         | 0.12 | 376.854         | 0.22 | 0.0000000       | 0.00 | 0.1701715       | 9.65 |
| 21F15883           | 24.0 % | ✓ | 0.753832        | 0.23 | 0.0000000       | 0.00 | 0.0005962        | 1.68 | 0.0000000        | 0.00   | 2.20560          | 1.68 | 0.1420974       | 0.28 | 0.0000000       | 0.00 | 4.74817         | 0.10 | 0.0003970        | 9.77  | 0.0000000        | 0.00   | 393.158         | 0.04 | 0.0014171        | 1.91 | 971.024         | 0.06 | 225.064         | 0.25 | 0.0000000       | 0.00 | 0.2386472       | 9.65 |
| 21F15885           | 24.0 % | ✓ | 3.158158        | 0.17 | 0.0000000       | 0.00 | 0.0010922        | 0.93 | 0.0000000        | 0.00   | 4.04051          | 0.91 | 0.5953127       | 0.23 | 0.0000000       | 0.00 | 7.82019         | 0.10 | 0.0007273        | 9.67  | 0.0000000        | 0.00   | 647.527         | 0.04 | 0.0025960        | 1.29 | 1590.459        | 0.12 | 942.900         | 0.20 | 0.0000000       | 0.00 | 0.3930492       | 9.65 |
| 21F15886           | 24.0 % | ✓ | 0.748349        | 0.23 | 0.0000000       | 0.00 | 0.0007337        | 1.41 | 0.0000000        | 0.00   | 2.71457          | 1.40 | 0.1410638       | 0.28 | 0.0000000       | 0.00 | 5.72246         | 0.10 | 0.0004886        | 9.73  | 0.0000000        | 0.00   | 473.831         | 0.04 | 0.0017441        | 1.68 | 1171.222        | 0.05 | 223.427         | 0.25 | 0.0000000       | 0.00 | 0.2876154       | 9.65 |
| 21F15888           | 24.0 % | ✓ | 0.992453        | 0.21 | 0.0000000       | 0.00 | 0.0009882        | 1.01 | 0.0000000        | 0.00   | 3.65581          | 1.00 | 0.1870773       | 0.27 | 0.0000000       | 0.00 | 7.56948         | 0.10 | 0.0006580        | 9.68  | 0.0000000        | 0.00   | 626.768         | 0.04 | 0.0023489        | 1.36 | 1549.800        | 0.05 | 296.307         | 0.24 | 0.0000000       | 0.00 | 0.3804482       | 9.65 |
| 21F15889           | 24.0 % | ✓ | 3.170983        | 0.17 | 0.0000000       | 0.00 | 0.0008644        | 1.14 | 0.0000000        | 0.00   | 3.19797          | 1.12 | 0.5977304       | 0.23 | 0.0000000       | 0.00 | 6.26431         | 0.10 | 0.0005756        | 9.70  | 0.0000000        | 0.00   | 518.698         | 0.04 | 0.0020547        | 1.45 | 1276.667        | 0.15 | 946.729         | 0.20 | 0.0000000       | 0.00 | 0.3148495       | 9.65 |
| 21F15891           | 24.0 % |   | 0.176162        | 0.45 | 0.0000000       | 0.00 | 0.0094575        | 0.31 | 0.0000008        | 133.64 | 34.98902         | 0.26 | 0.0332066       | 0.47 | 0.0000000       | 0.00 | 0.29839         | 0.11 | 0.0062980        | 9.63  | 0.0069632        | 133.64 | 24.707          | 0.06 | 0.0224804        | 0.96 | 59.747          | 0.40 | 52.595          | 0.46 | 0.0000000       | 0.00 | 0.0149971       | 9.65 |
| 21F15892           | 24.0 % | ✓ | 0.115767        | 0.55 | 0.0000000       | 0.00 | 0.0051786        | 0.35 | 0.0000008        | 136.44 | 19.15855         | 0.31 | 0.0218221       | 0.57 | 0.0000000       | 0.00 | 0.20544         | 0.11 | 0.0034485        | 9.63  | 0.0067280        | 136.44 | 17.011          | 0.07 | 0.0123094        | 0.97 | 41.922          | 0.47 | 34.563          | 0.56 | 0.0000000       | 0.00 | 0.0103255       | 9.65 |
| 21F15894           | 24.0 % | ✓ | 0.508256        | 0.25 | 0.0000000       | 0.00 | 0.0003548        | 2.75 | 0.0000000        | 0.00   | 1.31273          | 2.74 | 0.0958062       | 0.29 | 0.0000000       | 0.00 | 2.68165         | 0.10 | 0.0002363        | 10.01 | 0.0000000        | 0.00   | 222.046         | 0.04 | 0.0008434        | 2.89 | 546.951         | 0.07 | 151.745         | 0.27 | 0.0000000       | 0.00 | 0.1347819       | 9.65 |
| 21F15895           | 24.0 % | ✓ | 1.373409        | 0.20 | 0.0000000       | 0.00 | 0.0009911        | 0.98 | 0.0000000        | 0.00   | 3.66676          | 0.97 | 0.2588877       | 0.25 | 0.0000000       | 0.00 | 5.56616         | 0.10 | 0.0006600        | 9.68  | 0.0000000        | 0.00   | 460.889         | 0.04 | 0.0023559        | 1.34 | 1137.701        | 0.08 | 410.045         | 0.22 | 0.0000000       | 0.00 | 0.2797599       | 9.65 |
| 21F15897           | 24.0 % |   | 0.158901        | 0.52 | 0.0000000       | 0.00 | 0.0056171        | 0.35 | 0.0000000        | 0.00   | 20.78107         | 0.31 | 0.0299528       | 0.54 | 0.0000000       | 0.00 | 0.17624         | 0.12 | 0.0037406        | 9.63  | 0.0000000        | 0.00   | 14.593          | 0.08 | 0.0133518        | 0.97 | 34.706          | 0.72 | 47.441          | 0.53 | 0.0000000       | 0.00 | 0.0088580       | 9.65 |
| 21F15898           | 24.0 % |   | 0.427322        | 0.28 | 0.0000000       | 0.00 | 0.0080494        | 0.31 | 0.0000000        | 0.00   | 29.77942         | 0.26 | 0.0805502       | 0.32 | 0.0000000       | 0.00 | 0.28199         | 0.11 | 0.0053603        | 9.63  | 0.0000000        | 0.00   | 23.349          | 0.06 | 0.0191333        | 0.96 | 60.327          | 0.64 | 127.581         | 0.30 | 0.0000000       | 0.00 | 0.0141728       | 9.65 |
| 21F15900           | 24.0 % | ✓ | 0.029275        | 1.55 | 0.0000000       | 0.00 | 0.0002080        | 4.97 | 0.0000009        | 139.66 | 0.76970          | 4.97 | 0.0055184       | 1.56 | 0.0000000       | 0.00 | 1.70850         | 0.10 | 0.0001385        | 10.84 | 0.0073460        | 139.66 | 141.467         | 0.04 | 0.0004945        | 5.05 | 350.068         | 0.04 | 8.740           | 1.56 | 0.0000000       | 0.00 | 0.0858705       | 9.65 |
| 21F15901           | 24.0 % | ✓ | 0.010097        | 4.06 | 0.0000000       | 0.00 | 0.0088578        | 0.31 | 0.0000000        | 0.00   | 32.77031         | 0.26 | 0.0019033       | 4.07 | 0.0000000       | 0.00 | 0.22904         | 0.11 | 0.0058987        | 9.63  | 0.0000000        | 0.00   | 18.965          | 0.07 | 0.0210549        | 0.96 | 47.097          | 0.27 | 3.015           | 4.07 | 0.0000000       | 0.00 | 0.0115118       | 9.65 |
| 21F15903           | 24.0 % |   | 0.395901        | 0.30 | 0.0000000       | 0.00 | 0.0043035        | 0.38 | 0.0000005        | 215.37 | 15.92111         | 0.34 | 0.0746273       | 0.34 | 0.0000000       | 0.00 | 0.13880         | 0.13 | 0.0028658        | 9.64  | 0.0045774        | 215.37 | 11.493          | 0.10 | 0.0102293        | 0.98 | 27.548          | 1.36 | 118.200         | 0.32 | 0.0000000       | 0.00 | 0.0069761       | 9.65 |
| 21F15904           | 24.0 % |   | 0.053957        | 0.99 | 0.0000000       | 0.00 | 0.0041372        | 0.38 | 0.0000004        | 311.74 | 15.30602         | 0.34 | 0.0101708       | 1.01 | 0.0000000       | 0.00 | 0.12533         | 0.14 | 0.0027551        | 9.64  | 0.0031219        | 311.74 | 10.377          | 0.10 | 0.0098341        | 0.98 | 25.245          | 0.64 | 16.109          | 1.00 | 0.0000000       | 0.00 | 0.0062990       | 9.65 |
| 21F15906           | 24.0 % | ✓ | 1.956960        | 0.18 | 0.0000000       | 0.00 | 0.0010531        | 1.04 | 0.0000000        | 0.00   | 3.89607          | 1.02 | 0.3688870       | 0.24 | 0.0000000       | 0.00 | 7.65496         | 0.10 | 0.0007013        | 9.68  | 0.0000000        | 0.00   | 633.847         | 0.04 | 0.0025032        | 1.38 | 1563.950        | 0.08 | 584.270         | 0.21 | 0.0000000       | 0.00 | 0.3847449       | 9.65 |
| 21F15907           | 24.0 % | ✓ | 3.227184        | 0.17 | 0.0000000       | 0.00 | 0.0011048        | 0.98 | 0.0000000        | 0.00   | 4.08723          | 0.97 | 0.6083242       | 0.23 | 0.0000000       | 0.00 | 7.78517         | 0.10 | 0.0007357        | 9.68  | 0.0000000        | 0.00   | 644.628         | 0.04 | 0.0026260        | 1.34 | 1586.573        | 0.12 | 963.508         | 0.20 | 0.0000000       | 0.00 | 0.3912890       | 9.65 |
| 21F15909           | 24.0 % | ✓ | 0.419413        | 0.28 | 0.0000000       | 0.00 | 0.0005877        | 1.73 | 0.0000000        | 0.00   | 2.17443          | 1.72 | 0.0790593       | 0.33 | 0.0000000       | 0.00 | 4.35158         | 0.10 | 0.0003914        | 9.78  | 0.0000000        | 0.00   | 360.319         | 0.04 | 0.0013971        | 1.95 | 891.421         | 0.04 | 125.220         | 0.30 | 0.0000000       | 0.00 | 0.2187139       | 9.65 |
| 21F15910           | 24.0 % | ✓ | 0.146998        | 0.49 | 0.0000000       | 0.00 | 0.0003161        | 3.13 | 0.0000000        | 0.00   | 1.16949          | 3.13 | 0.0277090       | 0.51 | 0.0000000       | 0.00 | 2.71449         | 0.10 | 0.0002105        | 10.13 | 0.0000000        | 0.00   | 224.765         | 0.04 | 0.0007514        | 3.26 | 556.220         | 0.04 | 43.888          | 0.50 | 0.0000000       | 0.00 | 0.1364326       | 9.65 |
| 21F15912           | 24.0 % | ✓ | 0.278483        | 0.34 | 0.0000000       | 0.00 | 0.0002620        | 3.81 | 0.0000000        | 0.00   | 0.96935          | 3.81 | 0.0524940       | 0.37 | 0.0000000       | 0.00 | 2.09404         | 0.10 | 0.0001745        | 10.36 | 0.0000000        | 0.00   | 173.391         | 0.04 | 0.0006228        | 3.92 | 428.561         | 0.07 | 83.144          | 0.35 | 0.0000000       | 0.00 | 0.1052484       | 9.65 |
| 21F15913           | 24.0 % | ✓ | 5.352492        | 0.16 | 0.0000000       | 0.00 | 0.0010290        | 1.04 | 0.0000000        | 0.00   | 3.80702          | 1.03 | 1.0089448       | 0.23 | 0.0000000       | 0.00 | 7.64180         | 0.10 | 0.0006853        | 9.68  | 0.0000000        | 0.00   | 632.756         | 0.04 | 0.0024460        | 1.38 | 1547.090        | 0.20 | 1598.040        | 0.19 | 0.0000000       | 0.00 | 0.3840831       | 9.65 |
| 21F15915           | 24.0 % | ✓ | 0.539900        | 0.27 | 0.0000000       | 0.00 | 0.0012531        | 0.86 | 0.0000000        | 0.00   | 4.63579          | 0.85 | 0.1017712       | 0.31 | 0.0000000       | 0.00 | 8.33663         | 0.10 | 0.0008344        | 9.67  | 0.0000000        | 0.00   | 690.290         | 0.04 | 0.0029785        | 1.25 | 1708.232        | 0.03 | 161.193         | 0.29 | 0.0000000       | 0.00 | 0.4190058       | 9.65 |
| 21F15916           | 24.0 % | ✓ | 2.064586        | 0.18 | 0.0000000       | 0.00 | 0.0018681        | 0.65 | 0.0000000        | 0.00   | 6.91121          | 0.63 | 0.3891745       | 0.24 | 0.0000000       | 0.00 | 10.38705        | 0.10 | 0.0012440        | 9.65  | 0.0000000        | 0.00   | 860.069         | 0.04 | 0.0044404        | 1.12 | 2122.387        | 0.06 | 616.403         | 0.21 | 0.0000000       | 0.00 | 0.5220616       | 9.65 |
| Σ                  |        |   | 40.470611       | 0.05 | 0.0000000       | 0.00 | 0.0819883        | 0.11 | 0.0000048        | 61.76  | 303.32320        | 0.10 | 7.6287101       | 0.06 | 0.0000000       | 0.00 |                 |      |                  |       |                  |        |                 |      |                  |      |                 |      |                 |      |                 |      |                 |      |



| Additional Parameters |        |   | 40Ar/39Ar | 1σ       | 37Ar/39Ar | 1σ       | 36Ar/39Ar | 1σ       | Time (days) | 37Ar (decay) | 39Ar (decay) | 40Ar (moles) |
|-----------------------|--------|---|-----------|----------|-----------|----------|-----------|----------|-------------|--------------|--------------|--------------|
| 21F15873              | 24.0 % | ✓ | 2.966514  | 0.001112 | 0.006907  | 0.000106 | 0.001668  | 0.000004 | 72.290      | 4.180086     | 1.00051109   | 3.444E-11    |
| 21F15874              | 24.0 % | ✓ | 4.395671  | 0.001626 | 0.006708  | 0.000058 | 0.006509  | 0.000011 | 72.296      | 4.180602     | 1.00051113   | 1.062E-10    |
| 21F15876              | 24.0 % | ✓ | 3.996442  | 0.001479 | 0.006263  | 0.000059 | 0.005144  | 0.000009 | 72.308      | 4.181577     | 1.00051122   | 8.874E-11    |
| 21F15877              | 24.0 % |   | 14.812537 | 0.006522 | 1.382095  | 0.003392 | 0.042321  | 0.000079 | 72.314      | 4.182093     | 1.00051126   | 2.526E-11    |
| 21F15879              | 24.0 % | ✓ | 3.708247  | 0.001393 | 0.005755  | 0.000092 | 0.004192  | 0.000008 | 72.326      | 4.183069     | 1.00051134   | 5.164E-11    |
| 21F15880              | 24.0 % | ✓ | 3.039741  | 0.001123 | 0.005626  | 0.000054 | 0.001924  | 0.000004 | 72.332      | 4.183585     | 1.00051139   | 7.090E-11    |
| 21F15882              | 24.0 % | ✓ | 3.809086  | 0.001436 | 0.007432  | 0.000129 | 0.004504  | 0.000009 | 72.344      | 4.184561     | 1.00051147   | 3.780E-11    |
| 21F15883              | 24.0 % | ✓ | 3.042851  | 0.001138 | 0.005610  | 0.000094 | 0.001919  | 0.000004 | 72.350      | 4.185077     | 1.00051151   | 4.235E-11    |
| 21F15885              | 24.0 % | ✓ | 3.912948  | 0.001449 | 0.006240  | 0.000057 | 0.004879  | 0.000008 | 72.362      | 4.186053     | 1.00051160   | 8.969E-11    |
| 21F15886              | 24.0 % | ✓ | 2.943943  | 0.001094 | 0.005729  | 0.000080 | 0.001581  | 0.000004 | 72.367      | 4.186513     | 1.00051164   | 4.938E-11    |
| 21F15888              | 24.0 % | ✓ | 2.946035  | 0.001092 | 0.005833  | 0.000058 | 0.001585  | 0.000003 | 72.380      | 4.187546     | 1.00051173   | 6.537E-11    |
| 21F15889              | 24.0 % | ✓ | 4.287088  | 0.001593 | 0.006165  | 0.000069 | 0.006115  | 0.000011 | 72.385      | 4.188006     | 1.00051176   | 7.872E-11    |
| 21F15891              | 24.0 % |   | 4.543445  | 0.002878 | 1.414875  | 0.003760 | 0.007506  | 0.000032 | 72.398      | 4.189040     | 1.00051185   | 3.977E-12    |
| 21F15892              | 24.0 % | ✓ | 4.493692  | 0.003418 | 1.125452  | 0.003537 | 0.007105  | 0.000038 | 72.403      | 4.189500     | 1.00051189   | 2.708E-12    |
| 21F15894              | 24.0 % | ✓ | 3.147221  | 0.001205 | 0.005912  | 0.000162 | 0.002291  | 0.000006 | 72.416      | 4.190534     | 1.00051198   | 2.474E-11    |
| 21F15895              | 24.0 % | ✓ | 3.358761  | 0.001249 | 0.007956  | 0.000077 | 0.002982  | 0.000006 | 72.422      | 4.190994     | 1.00051202   | 5.480E-11    |
| 21F15897              | 24.0 % |   | 5.624722  | 0.004857 | 1.422742  | 0.004497 | 0.011263  | 0.000057 | 72.433      | 4.191972     | 1.00051210   | 2.908E-12    |
| 21F15898              | 24.0 % |   | 8.041862  | 0.004937 | 1.274363  | 0.003452 | 0.018631  | 0.000053 | 72.440      | 4.192489     | 1.00051215   | 6.652E-12    |
| 21F15900              | 24.0 % | ✓ | 2.536936  | 0.001006 | 0.005441  | 0.000270 | 0.000208  | 0.000003 | 72.451      | 4.193467     | 1.00051223   | 1.270E-11    |
| 21F15901              | 24.0 % | ✓ | 2.639985  | 0.002193 | 1.726020  | 0.004643 | 0.000998  | 0.000022 | 72.458      | 4.193985     | 1.00051227   | 1.774E-12    |
| 21F15903              | 24.0 % |   | 12.671128 | 0.012519 | 1.384096  | 0.004867 | 0.034792  | 0.000108 | 72.469      | 4.194963     | 1.00051236   | 5.160E-12    |
| 21F15904              | 24.0 % |   | 3.981968  | 0.004702 | 1.473571  | 0.005221 | 0.005593  | 0.000052 | 72.476      | 4.195481     | 1.00051240   | 1.464E-12    |
| 21F15906              | 24.0 % | ✓ | 3.389773  | 0.001255 | 0.006147  | 0.000063 | 0.003089  | 0.000006 | 72.488      | 4.196459     | 1.00051249   | 7.606E-11    |
| 21F15907              | 24.0 % | ✓ | 3.956488  | 0.001464 | 0.006340  | 0.000061 | 0.005008  | 0.000009 | 72.494      | 4.196977     | 1.00051253   | 9.029E-11    |
| 21F15909              | 24.0 % | ✓ | 2.822096  | 0.001054 | 0.006035  | 0.000104 | 0.001166  | 0.000003 | 72.506      | 4.197956     | 1.00051261   | 3.600E-11    |
| 21F15910              | 24.0 % | ✓ | 2.670527  | 0.001021 | 0.005203  | 0.000163 | 0.000655  | 0.000003 | 72.512      | 4.198474     | 1.00051266   | 2.125E-11    |
| 21F15912              | 24.0 % | ✓ | 2.951756  | 0.001141 | 0.005591  | 0.000213 | 0.001608  | 0.000005 | 72.524      | 4.199453     | 1.00051274   | 1.812E-11    |
| 21F15913              | 24.0 % | ✓ | 4.971112  | 0.001839 | 0.006017  | 0.000062 | 0.008461  | 0.000014 | 72.529      | 4.199914     | 1.00051278   | 1.114E-10    |
| 21F15915              | 24.0 % | ✓ | 2.708769  | 0.001005 | 0.006716  | 0.000057 | 0.000784  | 0.000002 | 72.542      | 4.200951     | 1.00051287   | 6.619E-11    |
| 21F15916              | 24.0 % | ✓ | 3.184976  | 0.001174 | 0.008036  | 0.000051 | 0.002403  | 0.000005 | 72.547      | 4.201412     | 1.00051291   | 9.697E-11    |



| Procedure<br>Blanks |        | 36Ar ± 1σ (SE)<br>[fA] | 37Ar ± 1σ (SE)<br>[fA] | 38Ar ± 1σ (SE)<br>[fA] | 39Ar ± 1σ (SE)<br>[fA] | 40Ar ± 1σ (SE)<br>[fA] |
|---------------------|--------|------------------------|------------------------|------------------------|------------------------|------------------------|
| 21F15873            | 24.0 % | 0.0134508 ± 0.0002172  | 0.0092752 ± 0.0060467  | 0.0051530 ± 0.0068555  | 0.0463854 ± 0.0065422  | 3.3013001 ± 0.0155666  |
| 21F15874            | 24.0 % | 0.0134508 ± 0.0002172  | 0.0092752 ± 0.0060467  | 0.0051530 ± 0.0068555  | 0.0463854 ± 0.0065422  | 3.3013001 ± 0.0155666  |
| 21F15876            | 24.0 % | 0.0125086 ± 0.0002213  | 0.0001708 ± 0.0061454  | 0.0026064 ± 0.0073329  | 0.0308702 ± 0.0063805  | 3.0577586 ± 0.0142440  |
| 21F15877            | 24.0 % | 0.0125086 ± 0.0002213  | 0.0001708 ± 0.0061454  | 0.0026064 ± 0.0073329  | 0.0308702 ± 0.0063805  | 3.0577586 ± 0.0142440  |
| 21F15879            | 24.0 % | 0.0141810 ± 0.0002467  | 0.0097890 ± 0.0058773  | 0.0083303 ± 0.0061826  | 0.0382295 ± 0.0056746  | 3.7340987 ± 0.0137007  |
| 21F15880            | 24.0 % | 0.0141810 ± 0.0002467  | 0.0097890 ± 0.0058773  | 0.0083303 ± 0.0061826  | 0.0382295 ± 0.0056746  | 3.7340987 ± 0.0137007  |
| 21F15882            | 24.0 % | 0.0131614 ± 0.0002440  | 0.0085397 ± 0.0061518  | 0.0096079 ± 0.0062298  | 0.0218308 ± 0.0071161  | 3.1504942 ± 0.0146220  |
| 21F15883            | 24.0 % | 0.0131614 ± 0.0002440  | 0.0085397 ± 0.0061518  | 0.0096079 ± 0.0062298  | 0.0218308 ± 0.0071161  | 3.1504942 ± 0.0146220  |
| 21F15885            | 24.0 % | 0.0123861 ± 0.0002369  | 0.0016758 ± 0.0061345  | 0.0015914 ± 0.0069343  | 0.0087413 ± 0.0065883  | 3.0472570 ± 0.0156322  |
| 21F15886            | 24.0 % | 0.0123861 ± 0.0002369  | 0.0016758 ± 0.0061345  | 0.0015914 ± 0.0069343  | 0.0087413 ± 0.0065883  | 3.0472570 ± 0.0156322  |
| 21F15888            | 24.0 % | 0.0131647 ± 0.0002291  | 0.0027006 ± 0.0061793  | 0.0005079 ± 0.0068751  | 0.0455638 ± 0.0059007  | 3.1483747 ± 0.0166887  |
| 21F15889            | 24.0 % | 0.0131647 ± 0.0002291  | 0.0027006 ± 0.0061793  | 0.0005079 ± 0.0068751  | 0.0455638 ± 0.0059007  | 3.1483747 ± 0.0166887  |
| 21F15891            | 24.0 % | 0.0129207 ± 0.0002068  | 0.0128787 ± 0.0061691  | 0.0070846 ± 0.0065374  | 0.0268478 ± 0.0064942  | 3.0011787 ± 0.0171183  |
| 21F15892            | 24.0 % | 0.0129207 ± 0.0002068  | 0.0128787 ± 0.0061691  | 0.0070846 ± 0.0065374  | 0.0268478 ± 0.0064942  | 3.0011787 ± 0.0171183  |
| 21F15894            | 24.0 % | 0.0122617 ± 0.0002071  | 0.0101160 ± 0.0061452  | 0.0079621 ± 0.0068195  | 0.0206806 ± 0.0061815  | 2.9530318 ± 0.0175666  |
| 21F15895            | 24.0 % | 0.0122617 ± 0.0002071  | 0.0101160 ± 0.0061452  | 0.0079621 ± 0.0068195  | 0.0206806 ± 0.0061815  | 2.9530318 ± 0.0175666  |
| 21F15897            | 24.0 % | 0.0132109 ± 0.0002202  | 0.0092317 ± 0.0059773  | 0.0037977 ± 0.0064178  | 0.0143241 ± 0.0067693  | 3.0177929 ± 0.0144234  |
| 21F15898            | 24.0 % | 0.0132109 ± 0.0002202  | 0.0092317 ± 0.0059773  | 0.0037977 ± 0.0064178  | 0.0143241 ± 0.0067693  | 3.0177929 ± 0.0144234  |
| 21F15900            | 24.0 % | 0.0136079 ± 0.0002697  | 0.0122431 ± 0.0062819  | 0.0030392 ± 0.0064067  | 0.0302113 ± 0.0061792  | 3.1726764 ± 0.0173741  |
| 21F15901            | 24.0 % | 0.0136079 ± 0.0002697  | 0.0122431 ± 0.0062819  | 0.0030392 ± 0.0064067  | 0.0302113 ± 0.0061792  | 3.1726764 ± 0.0173741  |
| 21F15903            | 24.0 % | 0.0122365 ± 0.0002299  | 0.0135272 ± 0.0061796  | 0.0046220 ± 0.0072022  | 0.0157988 ± 0.0067784  | 3.0517934 ± 0.0132767  |
| 21F15904            | 24.0 % | 0.0122365 ± 0.0002299  | 0.0135272 ± 0.0061796  | 0.0046220 ± 0.0072022  | 0.0157988 ± 0.0067784  | 3.0517934 ± 0.0132767  |
| 21F15906            | 24.0 % | 0.0137178 ± 0.0002693  | 0.0177182 ± 0.0066559  | 0.0067391 ± 0.0069212  | 0.0451158 ± 0.0058058  | 3.2322581 ± 0.0146655  |
| 21F15907            | 24.0 % | 0.0137178 ± 0.0002693  | 0.0177182 ± 0.0066559  | 0.0067391 ± 0.0069212  | 0.0451158 ± 0.0058058  | 3.2322581 ± 0.0146655  |
| 21F15909            | 24.0 % | 0.0136079 ± 0.0002697  | 0.0122431 ± 0.0062819  | 0.0030392 ± 0.0064067  | 0.0302113 ± 0.0061792  | 3.1726764 ± 0.0173741  |
| 21F15910            | 24.0 % | 0.0136079 ± 0.0002697  | 0.0122431 ± 0.0062819  | 0.0030392 ± 0.0064067  | 0.0302113 ± 0.0061792  | 3.1726764 ± 0.0173741  |
| 21F15912            | 24.0 % | 0.0122365 ± 0.0002299  | 0.0135272 ± 0.0061796  | 0.0046220 ± 0.0072022  | 0.0157988 ± 0.0067784  | 3.0517934 ± 0.0132767  |
| 21F15913            | 24.0 % | 0.0122365 ± 0.0002299  | 0.0135272 ± 0.0061796  | 0.0046220 ± 0.0072022  | 0.0157988 ± 0.0067784  | 3.0517934 ± 0.0132767  |
| 21F15915            | 24.0 % | 0.0137178 ± 0.0002693  | 0.0177182 ± 0.0066559  | 0.0067391 ± 0.0069212  | 0.0451158 ± 0.0058058  | 3.2322581 ± 0.0146655  |
| 21F15916            | 24.0 % | 0.0137178 ± 0.0002693  | 0.0177182 ± 0.0066559  | 0.0067391 ± 0.0069212  | 0.0451158 ± 0.0058058  | 3.2322581 ± 0.0146655  |

| Intercept<br>Values |        | 36Ar ± 1σ (SE)<br>[fA] | r2     | Regression<br>(type,n) | 37Ar ± 1σ (SE)<br>[fA] | r2     | Regression<br>(type,n) | 38Ar ± 1σ (SE)<br>[fA] | r2     | Regression<br>(type,n) | 39Ar ± 1σ (SE)<br>[fA] | r2     | Regression<br>(type,n) | 40Ar ± 1σ (SE)<br>[fA] | r2     | Regression<br>(type,n) |
|---------------------|--------|------------------------|--------|------------------------|------------------------|--------|------------------------|------------------------|--------|------------------------|------------------------|--------|------------------------|------------------------|--------|------------------------|
| 21F15873            | 24.0 % | 0.5285370 ± 0.0009955  | 0.9579 | EXP 150 of 150         | 0.5476300 ± 0.0055265  | 0.3970 | EXP 149 of 150         | 4.028737 ± 0.007227    | 0.9725 | EXP 150 of 150         | 327.11291 ± 0.02141    | 1.0000 | EXP 150 of 150         | 976.1236 ± 0.0462      | 1.0000 | EXP 150 of 150         |
| 21F15874            | 24.0 % | 4.1974225 ± 0.0028187  | 0.9963 | EXP 149 of 150         | 1.0975598 ± 0.0067818  | 0.6708 | EXP 150 of 150         | 9.026150 ± 0.007697    | 0.9940 | EXP 150 of 150         | 680.88618 ± 0.03591    | 1.0000 | EXP 150 of 150         | 3003.9916 ± 0.0776     | 1.0000 | EXP 147 of 150         |
| 21F15876            | 24.0 % | 3.0510884 ± 0.0022950  | 0.9954 | EXP 148 of 150         | 0.9333188 ± 0.0059191  | 0.6455 | EXP 149 of 150         | 8.117362 ± 0.007309    | 0.9933 | EXP 150 of 150         | 625.61310 ± 0.03073    | 1.0000 | EXP 148 of 150         | 2509.7965 ± 0.0832     | 1.0000 | EXP 150 of 150         |
| 21F15877            | 24.0 % | 1.9322202 ± 0.0020353  | 0.9909 | EXP 150 of 150         | 15.8171826 ± 0.0084580 | 0.9971 | EXP 148 of 150         | 0.962852 ± 0.005970    | 0.6822 | EXP 149 of 150         | 48.07422 ± 0.00957     | 0.9997 | EXP 147 of 150         | 716.5905 ± 0.0381      | 1.0000 | EXP 148 of 150         |
| 21F15879            | 24.0 % | 1.5668926 ± 0.0018779  | 0.9871 | EXP 150 of 150         | 0.5474593 ± 0.0061927  | 0.4125 | EXP 150 of 150         | 5.008668 ± 0.006620    | 0.9857 | EXP 150 of 150         | 392.35193 ± 0.03013    | 1.0000 | EXP 150 of 150         | 1462.3915 ± 0.0578     | 1.0000 | EXP 150 of 150         |
| 21F15880            | 24.0 % | 1.2078549 ± 0.0016193  | 0.9810 | EXP 150 of 150         | 0.8901496 ± 0.0057549  | 0.6486 | EXP 148 of 150         | 8.110865 ± 0.007046    | 0.9935 | EXP 149 of 150         | 657.13365 ± 0.03197    | 1.0000 | EXP 150 of 150         | 2006.4356 ± 0.0559     | 1.0000 | EXP 149 of 150         |
| 21F15882            | 24.0 % | 1.2023053 ± 0.0015281  | 0.9857 | EXP 148 of 150         | 0.5032855 ± 0.0058466  | 0.3622 | EXP 150 of 150         | 3.611184 ± 0.007308    | 0.9662 | EXP 149 of 150         | 279.62945 ± 0.02221    | 1.0000 | EXP 148 of 150         | 1071.0269 ± 0.0448     | 1.0000 | EXP 149 of 150         |
| 21F15883            | 24.0 % | 0.7235845 ± 0.0012328  | 0.9658 | EXP 150 of 150         | 0.5321747 ± 0.0061424  | 0.2632 | EXP 149 of 150         | 4.839422 ± 0.006438    | 0.9851 | EXP 145 of 150         | 392.14085 ± 0.02599    | 1.0000 | EXP 150 of 150         | 1199.4772 ± 0.0478     | 1.0000 | EXP 148 of 150         |
| 21F15885            | 24.0 % | 2.9873580 ± 0.0022901  | 0.9950 | EXP 150 of 150         | 0.9573645 ± 0.0057991  | 0.6926 | EXP 148 of 150         | 8.364708 ± 0.007337    | 0.9936 | EXP 150 of 150         | 645.82453 ± 0.03316    | 1.0000 | EXP 149 of 150         | 2536.7991 ± 0.0825     | 1.0000 | EXP 150 of 150         |
| 21F15886            | 24.0 % | 0.7177754 ± 0.0012250  | 0.9631 | EXP 150 of 150         | 0.6425737 ± 0.0064498  | 0.4206 | EXP 150 of 150         | 5.836087 ± 0.007959    | 0.9845 | EXP 150 of 150         | 472.58707 ± 0.02727    | 1.0000 | EXP 150 of 150         | 1397.9841 ± 0.0493     | 1.0000 | EXP 147 of 150         |
| 21F15888            | 24.0 % | 0.9486586 ± 0.0014085  | 0.9749 | EXP 149 of 150         | 0.8701207 ± 0.0057088  | 0.6114 | EXP 150 of 150         | 7.698063 ± 0.007836    | 0.9914 | EXP 150 of 150         | 625.15658 ± 0.03304    | 1.0000 | EXP 149 of 150         | 1849.6358 ± 0.0596     | 1.0000 | EXP 150 of 150         |
| 21F15889            | 24.0 % | 2.9999998 ± 0.0023941  | 0.9947 | EXP 150 of 150         | 0.7614042 ± 0.0055964  | 0.6133 | EXP 148 of 150         | 6.812767 ± 0.006968    | 0.9911 | EXP 150 of 150         | 517.37194 ± 0.03070    | 1.0000 | EXP 149 of 150         | 2226.8594 ± 0.0704     | 1.0000 | EXP 148 of 150         |
| 21F15891            | 24.0 % | 0.1877140 ± 0.0006605  | 0.7433 | EXP 150 of 150         | 8.3118150 ± 0.0071837  | 0.9922 | EXP 150 of 150         | 0.336292 ± 0.006483    | 0.1980 | EXP 150 of 150         | 24.69078 ± 0.00956     | 0.9986 | EXP 150 of 150         | 115.3579 ± 0.0178      | 0.9991 | EXP 150 of 150         |
| 21F15892            | 24.0 % | 0.1268122 ± 0.0005393  | 0.3161 | EXP 150 of 150         | 4.5565366 ± 0.0066838  | 0.9779 | EXP 150 of 150         | 0.229335 ± 0.006352    | 0.0812 | EXP 150 of 150         | 17.00475 ± 0.00726     | 0.9983 | EXP 150 of 150         | 79.4972 ± 0.0197       | 0.9945 | EXP 150 of 150         |
| 21F15894            | 24.0 % | 0.4912053 ± 0.0009288  | 0.9549 | EXP 150 of 150         | 0.3213665 ± 0.0058911  | 0.1099 | EXP 150 of 150         | 2.760754 ± 0.006495    | 0.9537 | EXP 150 of 150         | 221.47959 ± 0.02056    | 0.9999 | EXP 150 of 150         | 701.7835 ± 0.0392      | 1.0000 | EXP 150 of 150         |
| 21F15895            | 24.0 % | 1.3064940 ± 0.0016983  | 0.9839 | EXP 150 of 150         | 0.8794177 ± 0.0054021  | 0.6716 | EXP 149 of 150         | 5.793534 ± 0.007615    | 0.9855 | EXP 150 of 150         | 459.69207 ± 0.02676    | 1.0000 | EXP 148 of 150         | 1550.9784 ± 0.0555     | 1.0000 | EXP 150 of 150         |
| 21F15897            | 24.0 % | 0.1681326 ± 0.0007042  | 0.6419 | EXP 150 of 150         | 4.9347830 ± 0.0076961  | 0.9746 | EXP 150 of 150         | 0.209507 ± 0.006320    | 0.1045 | EXP 150 of 150         | 14.58200 ± 0.00818     | 0.9970 | EXP 150 of 150         | 85.1745 ± 0.0184       | 0.9973 | EXP 148 of 150         |
| 21F15898            | 24.0 % | 0.4231873 ± 0.0009392  | 0.9466 | EXP 147 of 150         | 7.0667099 ± 0.0065272  | 0.9913 | EXP 146 of 150         | 0.364260 ± 0.007359    | 0.2122 | EXP 150 of 150         | 23.32053 ± 0.00862     | 0.9988 | EXP 150 of 150         | 190.9407 ± 0.0242      | 0.9997 | EXP 150 of 150         |
| 21F15900            | 24.0 % | 0.0413723 ± 0.0003294  | 0.8446 | EXP 150 of 150         | 0.1946127 ± 0.0065108  | 0.0230 | EXP 150 of 150         | 1.717169 ± 0.006648    | 0.8846 | EXP 149 of 150         | 141.12317 ± 0.01597    | 0.9999 | EXP 148 of 150         | 362.0668 ± 0.0295      | 0.9999 | EXP 148 of 150         |
| 21F15901            | 24.0 % | 0.0314571 ± 0.0002742  | 0.8365 | EXP 147 of 150         | 7.7757671 ± 0.0065963  | 0.9925 | EXP 149 of 150         | 0.231910 ± 0.007039    | 0.0731 | EXP 150 of 150         | 18.96599 ± 0.00857     | 0.9982 | EXP 150 of 150         | 53.2956 ± 0.0177       | 0.9252 | EXP 150 of 150         |
| 21F15903            | 24.0 % | 0.3890974 ± 0.0009378  | 0.9313 | EXP 150 of 150         | 3.7844747 ± 0.0068738  | 0.9674 | EXP 150 of 150         | 0.215300 ± 0.006642    | 0.0589 | EXP 150 of 150         | 11.48824 ± 0.00778     | 0.9957 | EXP 150 of 150         | 148.8065 ± 0.0233      | 0.9996 | EXP 149 of 150         |
| 21F15904            | 24.0 % | 0.0669420 ± 0.0004425  | 0.1299 | EXP 150 of 150         | 3.6383406 ± 0.0064349  | 0.9681 | EXP 150 of 150         | 0.136146 ± 0.006467    | 0.0336 | EXP 150 of 150         | 10.37531 ± 0.00744     | 0.9952 | EXP 150 of 150         | 44.4126 ± 0.0191       | 0.3250 | EXP 150 of 150         |
| 21F15906            | 24.0 % | 1.8575211 ± 0.0018597  | 0.9907 | EXP 150 of 150         | 0.9401805 ± 0.0063562  | 0.6051 | EXP 149 of 150         | 7.964825 ± 0.007371    | 0.9929 | EXP 150 of 150         | 632.21554 ± 0.03326    | 1.0000 | EXP 150 of 150         | 2151.8368 ± 0.0668     | 1.0000 | EXP 150 of 150         |
| 21F15907            | 24.0 % | 3.0537021 ± 0.0023634  | 0.9950 | EXP 150 of 150         | 0.9853232 ± 0.0061873  | 0.6657 | EXP 149 of 150         | 8.360734 ± 0.007584    | 0.9931 | EXP 147 of 150         | 642.96827 ± 0.03370    | 1.0000 | EXP 149 of 150         | 2553.7048 ± 0.0740     | 1.0000 | EXP 148 of 150         |
| 21F15909            | 24.0 % | 0.4091100 ± 0.0009213  | 0.9117 | EXP 150 of 150         | 0.5268944 ± 0.0061395  | 0.3856 | EXP 149 of 150         | 4.414041 ± 0.006575    | 0.9817 | EXP 150 of 150         | 359.39678 ± 0.02137    | 1.0000 | EXP 150 of 150         | 1020.0327 ± 0.0453     | 1.0000 | EXP 150 of 150         |
| 21F15910            | 24.0 % | 0.1523289 ± 0.0005836  | 0.2877 | EXP 150 of 150         | 0.2890072 ± 0.0059260  | 0.1220 | EXP 149 of 150         | 2.727284 ± 0.007349    | 0.9419 | EXP 150 of 150         | 224.20115 ± 0.02055    | 0.9999 | EXP 150 of 150         | 603.4171 ± 0.0315      | 1.0000 | EXP 149 of 150         |
| 21F15912            | 24.0 % | 0.2747223 ± 0.0007587  | 0.8576 | EXP 150 of 150         | 0.2428742 ± 0.0061455  | 0.0797 | EXP 150 of 150         | 2.120980 ± 0.006777    | 0.9214 | EXP 150 of 150         | 172.94822 ± 0.01697    | 0.9999 | EXP 149 of 150         | 514.8616 ± 0.0333      | 1.0000 | EXP 150 of 150         |
| 21F15913            | 24.0 % | 5.0534889 ± 0.0031307  | 0.9969 | EXP 150 of 150         | 0.9141649 ± 0.0065927  | 0.5677 | EXP 150 of 150         | 8.601295 ± 0.007731    | 0.9932 | EXP 150 of 150         | 631.09865 ± 0.03201    | 1.0000 | EXP 150 of 150         | 3148.5664 ± 0.0914     | 1.0000 | EXP 148 of 150         |
| 21F15915            | 24.0 % | 0.5233057 ± 0.0011073  | 0.9232 | EXP 149 of 150         | 1.1141499 ± 0.0059232  | 0.7099 | EXP 145 of 150         | 8.376016 ± 0.007606    | 0.9932 | EXP 146 of 150         | 688.50929 ± 0.03813    | 1.0000 | EXP 150 of 150         | 1873.0753 ± 0.0667     | 1.0000 | EXP 150 of 150         |
| 21F15916            | 24.0 % | 1.9596365 ± 0.0021241  | 0.9889 | EXP 150 of 150         | 1.6521383 ± 0.0069032  | 0.8403 | EXP 150 of 150         | 10.673631 ± 0.007046   | 0.9964 | EXP 148 of 150         | 857.83999 ± 0.03517    | 1.0000 | EXP 150 of 150         | 2742.5438 ± 0.0777     | 1.0000 | EXP 149 of 150         |

| Project Info |        | Analyst     | Irradiation | X-pos | Y-pos | Z/H-pos | Project                | Experiment | Nmb |
|--------------|--------|-------------|-------------|-------|-------|---------|------------------------|------------|-----|
| 21F15873     | 24.0 % | Dan Miggins | 21-OSU-04   | 0.00  | 0.00  | 2.22    | Oregon\Swenton (20-01) | 21F15869   | 01  |
| 21F15874     | 24.0 % | Dan Miggins | 21-OSU-04   | 0.00  | 0.00  | 2.22    | Oregon\Swenton (20-01) | 21F15869   | 01  |
| 21F15876     | 24.0 % | Dan Miggins | 21-OSU-04   | 0.00  | 0.00  | 2.22    | Oregon\Swenton (20-01) | 21F15869   | 01  |
| 21F15877     | 24.0 % | Dan Miggins | 21-OSU-04   | 0.00  | 0.00  | 2.22    | Oregon\Swenton (20-01) | 21F15869   | 01  |
| 21F15879     | 24.0 % | Dan Miggins | 21-OSU-04   | 0.00  | 0.00  | 2.22    | Oregon\Swenton (20-01) | 21F15869   | 01  |
| 21F15880     | 24.0 % | Dan Miggins | 21-OSU-04   | 0.00  | 0.00  | 2.22    | Oregon\Swenton (20-01) | 21F15869   | 01  |
| 21F15882     | 24.0 % | Dan Miggins | 21-OSU-04   | 0.00  | 0.00  | 2.22    | Oregon\Swenton (20-01) | 21F15869   | 01  |
| 21F15883     | 24.0 % | Dan Miggins | 21-OSU-04   | 0.00  | 0.00  | 2.22    | Oregon\Swenton (20-01) | 21F15869   | 01  |
| 21F15885     | 24.0 % | Dan Miggins | 21-OSU-04   | 0.00  | 0.00  | 2.22    | Oregon\Swenton (20-01) | 21F15869   | 01  |
| 21F15886     | 24.0 % | Dan Miggins | 21-OSU-04   | 0.00  | 0.00  | 2.22    | Oregon\Swenton (20-01) | 21F15869   | 01  |
| 21F15888     | 24.0 % | Dan Miggins | 21-OSU-04   | 0.00  | 0.00  | 2.22    | Oregon\Swenton (20-01) | 21F15869   | 01  |
| 21F15889     | 24.0 % | Dan Miggins | 21-OSU-04   | 0.00  | 0.00  | 2.22    | Oregon\Swenton (20-01) | 21F15869   | 01  |
| 21F15891     | 24.0 % | Dan Miggins | 21-OSU-04   | 0.00  | 0.00  | 2.22    | Oregon\Swenton (20-01) | 21F15869   | 01  |
| 21F15892     | 24.0 % | Dan Miggins | 21-OSU-04   | 0.00  | 0.00  | 2.22    | Oregon\Swenton (20-01) | 21F15869   | 01  |
| 21F15894     | 24.0 % | Dan Miggins | 21-OSU-04   | 0.00  | 0.00  | 2.22    | Oregon\Swenton (20-01) | 21F15869   | 01  |
| 21F15895     | 24.0 % | Dan Miggins | 21-OSU-04   | 0.00  | 0.00  | 2.22    | Oregon\Swenton (20-01) | 21F15869   | 01  |
| 21F15897     | 24.0 % | Dan Miggins | 21-OSU-04   | 0.00  | 0.00  | 2.22    | Oregon\Swenton (20-01) | 21F15869   | 01  |
| 21F15898     | 24.0 % | Dan Miggins | 21-OSU-04   | 0.00  | 0.00  | 2.22    | Oregon\Swenton (20-01) | 21F15869   | 01  |
| 21F15900     | 24.0 % | Dan Miggins | 21-OSU-04   | 0.00  | 0.00  | 2.22    | Oregon\Swenton (20-01) | 21F15869   | 01  |
| 21F15901     | 24.0 % | Dan Miggins | 21-OSU-04   | 0.00  | 0.00  | 2.22    | Oregon\Swenton (20-01) | 21F15869   | 01  |
| 21F15903     | 24.0 % | Dan Miggins | 21-OSU-04   | 0.00  | 0.00  | 2.22    | Oregon\Swenton (20-01) | 21F15869   | 01  |
| 21F15904     | 24.0 % | Dan Miggins | 21-OSU-04   | 0.00  | 0.00  | 2.22    | Oregon\Swenton (20-01) | 21F15869   | 01  |
| 21F15906     | 24.0 % | Dan Miggins | 21-OSU-04   | 0.00  | 0.00  | 2.22    | Oregon\Swenton (20-01) | 21F15869   | 01  |
| 21F15907     | 24.0 % | Dan Miggins | 21-OSU-04   | 0.00  | 0.00  | 2.22    | Oregon\Swenton (20-01) | 21F15869   | 01  |
| 21F15909     | 24.0 % | Dan Miggins | 21-OSU-04   | 0.00  | 0.00  | 2.22    | Oregon\Swenton (20-01) | 21F15869   | 01  |
| 21F15910     | 24.0 % | Dan Miggins | 21-OSU-04   | 0.00  | 0.00  | 2.22    | Oregon\Swenton (20-01) | 21F15869   | 01  |
| 21F15912     | 24.0 % | Dan Miggins | 21-OSU-04   | 0.00  | 0.00  | 2.22    | Oregon\Swenton (20-01) | 21F15869   | 01  |
| 21F15913     | 24.0 % | Dan Miggins | 21-OSU-04   | 0.00  | 0.00  | 2.22    | Oregon\Swenton (20-01) | 21F15869   | 01  |
| 21F15915     | 24.0 % | Dan Miggins | 21-OSU-04   | 0.00  | 0.00  | 2.22    | Oregon\Swenton (20-01) | 21F15869   | 01  |
| 21F15916     | 24.0 % | Dan Miggins | 21-OSU-04   | 0.00  | 0.00  | 2.22    | Oregon\Swenton (20-01) | 21F15869   | 01  |

| Sample Parameters |        | Sample   | Material | Location     | Standard Name   | Standard (in Ma) | %1σ   | Standard Reference  | Standard 40Ar/39Ar | %1σ   | J          | %1σ   | Air 40Ar/36Ar | %1σ   | MDF (lin)  | %1σ   | Volume Ratio | Sensitivity (mol/volt) | Day | Month | Year | Hour | Min | Resist |
|-------------------|--------|----------|----------|--------------|-----------------|------------------|-------|---------------------|--------------------|-------|------------|-------|---------------|-------|------------|-------|--------------|------------------------|-----|-------|------|------|-----|--------|
| 21F15873          | 24.0 % | VS19-109 | Sanidine | N of Drewsey | FCT-NM (4X3-21) | 28.201           | 0.082 | Kuiper et al (2008) | 9.38682            | 0.113 | 0.00165397 | 0.113 | 301.136       | 0.104 | 0.99785867 | 0.037 | 1            | 3.54E-14               | 27  | AUG   | 2021 | 22   | 28  | 1      |
| 21F15874          | 24.0 % | VS19-109 | Sanidine | N of Drewsey | FCT-NM (4X3-21) | 28.201           | 0.082 | Kuiper et al (2008) | 9.38682            | 0.113 | 0.00165397 | 0.113 | 301.136       | 0.104 | 0.99785867 | 0.037 | 1            | 3.54E-14               | 27  | AUG   | 2021 | 22   | 37  | 1      |
| 21F15876          | 24.0 % | VS19-109 | Sanidine | N of Drewsey | FCT-NM (4X3-21) | 28.201           | 0.082 | Kuiper et al (2008) | 9.38682            | 0.113 | 0.00165397 | 0.113 | 301.136       | 0.104 | 0.99785867 | 0.037 | 1            | 3.54E-14               | 27  | AUG   | 2021 | 22   | 54  | 1      |
| 21F15877          | 24.0 % | VS19-109 | Sanidine | N of Drewsey | FCT-NM (4X3-21) | 28.201           | 0.082 | Kuiper et al (2008) | 9.38682            | 0.113 | 0.00165397 | 0.113 | 301.136       | 0.104 | 0.99785867 | 0.037 | 1            | 3.54E-14               | 27  | AUG   | 2021 | 23   | 3   | 1      |
| 21F15879          | 24.0 % | VS19-109 | Sanidine | N of Drewsey | FCT-NM (4X3-21) | 28.201           | 0.082 | Kuiper et al (2008) | 9.38682            | 0.113 | 0.00165397 | 0.113 | 301.136       | 0.104 | 0.99785867 | 0.037 | 1            | 3.54E-14               | 27  | AUG   | 2021 | 23   | 20  | 1      |
| 21F15880          | 24.0 % | VS19-109 | Sanidine | N of Drewsey | FCT-NM (4X3-21) | 28.201           | 0.082 | Kuiper et al (2008) | 9.38682            | 0.113 | 0.00165397 | 0.113 | 301.136       | 0.104 | 0.99785867 | 0.037 | 1            | 3.54E-14               | 27  | AUG   | 2021 | 23   | 29  | 1      |
| 21F15882          | 24.0 % | VS19-109 | Sanidine | N of Drewsey | FCT-NM (4X3-21) | 28.201           | 0.082 | Kuiper et al (2008) | 9.38682            | 0.113 | 0.00165397 | 0.113 | 301.136       | 0.104 | 0.99785867 | 0.037 | 1            | 3.54E-14               | 27  | AUG   | 2021 | 23   | 46  | 1      |
| 21F15883          | 24.0 % | VS19-109 | Sanidine | N of Drewsey | FCT-NM (4X3-21) | 28.201           | 0.082 | Kuiper et al (2008) | 9.38682            | 0.113 | 0.00165397 | 0.113 | 301.136       | 0.104 | 0.99785867 | 0.037 | 1            | 3.54E-14               | 27  | AUG   | 2021 | 23   | 55  | 1      |
| 21F15885          | 24.0 % | VS19-109 | Sanidine | N of Drewsey | FCT-NM (4X3-21) | 28.201           | 0.082 | Kuiper et al (2008) | 9.38682            | 0.113 | 0.00165397 | 0.113 | 301.136       | 0.104 | 0.99785867 | 0.037 | 1            | 3.54E-14               | 28  | AUG   | 2021 | 0    | 12  | 1      |
| 21F15886          | 24.0 % | VS19-109 | Sanidine | N of Drewsey | FCT-NM (4X3-21) | 28.201           | 0.082 | Kuiper et al (2008) | 9.38682            | 0.113 | 0.00165397 | 0.113 | 301.136       | 0.104 | 0.99785867 | 0.037 | 1            | 3.54E-14               | 28  | AUG   | 2021 | 0    | 20  | 1      |
| 21F15888          | 24.0 % | VS19-109 | Sanidine | N of Drewsey | FCT-NM (4X3-21) | 28.201           | 0.082 | Kuiper et al (2008) | 9.38682            | 0.113 | 0.00165397 | 0.113 | 301.136       | 0.104 | 0.99785867 | 0.037 | 1            | 3.54E-14               | 28  | AUG   | 2021 | 0    | 38  | 1      |
| 21F15889          | 24.0 % | VS19-109 | Sanidine | N of Drewsey | FCT-NM (4X3-21) | 28.201           | 0.082 | Kuiper et al (2008) | 9.38682            | 0.113 | 0.00165397 | 0.113 | 301.136       | 0.104 | 0.99785867 | 0.037 | 1            | 3.54E-14               | 28  | AUG   | 2021 | 0    | 46  | 1      |
| 21F15891          | 24.0 % | VS19-109 | Sanidine | N of Drewsey | FCT-NM (4X3-21) | 28.201           | 0.082 | Kuiper et al (2008) | 9.38682            | 0.113 | 0.00165397 | 0.113 | 301.136       | 0.104 | 0.99785867 | 0.037 | 1            | 3.54E-14               | 28  | AUG   | 2021 | 1    | 4   | 1      |
| 21F15892          | 24.0 % | VS19-109 | Sanidine | N of Drewsey | FCT-NM (4X3-21) | 28.201           | 0.082 | Kuiper et al (2008) | 9.38682            | 0.113 | 0.00165397 | 0.113 | 301.136       | 0.104 | 0.99785867 | 0.037 | 1            | 3.54E-14               | 28  | AUG   | 2021 | 1    | 12  | 1      |
| 21F15894          | 24.0 % | VS19-109 | Sanidine | N of Drewsey | FCT-NM (4X3-21) | 28.201           | 0.082 | Kuiper et al (2008) | 9.38682            | 0.113 | 0.00165397 | 0.113 | 301.136       | 0.104 | 0.99785867 | 0.037 | 1            | 3.54E-14               | 28  | AUG   | 2021 | 1    | 30  | 1      |
| 21F15895          | 24.0 % | VS19-109 | Sanidine | N of Drewsey | FCT-NM (4X3-21) | 28.201           | 0.082 | Kuiper et al (2008) | 9.38682            | 0.113 | 0.00165397 | 0.113 | 301.136       | 0.104 | 0.99785867 | 0.037 | 1            | 3.54E-14               | 28  | AUG   | 2021 | 1    | 38  | 1      |
| 21F15897          | 24.0 % | VS19-109 | Sanidine | N of Drewsey | FCT-NM (4X3-21) | 28.201           | 0.082 | Kuiper et al (2008) | 9.38682            | 0.113 | 0.00165397 | 0.113 | 301.136       | 0.104 | 0.99785867 | 0.037 | 1            | 3.54E-14               | 28  | AUG   | 2021 | 1    | 55  | 1      |
| 21F15898          | 24.0 % | VS19-109 | Sanidine | N of Drewsey | FCT-NM (4X3-21) | 28.201           | 0.082 | Kuiper et al (2008) | 9.38682            | 0.113 | 0.00165397 | 0.113 | 301.136       | 0.104 | 0.99785867 | 0.037 | 1            | 3.54E-14               | 28  | AUG   | 2021 | 2    | 4   | 1      |
| 21F15900          | 24.0 % | VS19-109 | Sanidine | N of Drewsey | FCT-NM (4X3-21) | 28.201           | 0.082 | Kuiper et al (2008) | 9.38682            | 0.113 | 0.00165397 | 0.113 | 301.136       | 0.104 | 0.99785867 | 0.037 | 1            | 3.54E-14               | 28  | AUG   | 2021 | 2    | 21  | 1      |
| 21F15901          | 24.0 % | VS19-109 | Sanidine | N of Drewsey | FCT-NM (4X3-21) | 28.201           | 0.082 | Kuiper et al (2008) | 9.38682            | 0.113 | 0.00165397 | 0.113 | 301.136       | 0.104 | 0.99785867 | 0.037 | 1            | 3.54E-14               | 28  | AUG   | 2021 | 2    | 30  | 1      |
| 21F15903          | 24.0 % | VS19-109 | Sanidine | N of Drewsey | FCT-NM (4X3-21) | 28.201           | 0.082 | Kuiper et al (2008) | 9.38682            | 0.113 | 0.00165397 | 0.113 | 301.136       | 0.104 | 0.99785867 | 0.037 | 1            | 3.54E-14               | 28  | AUG   | 2021 | 2    | 47  | 1      |
| 21F15904          | 24.0 % | VS19-109 | Sanidine | N of Drewsey | FCT-NM (4X3-21) | 28.201           | 0.082 | Kuiper et al (2008) | 9.38682            | 0.113 | 0.00165397 | 0.113 | 301.136       | 0.104 | 0.99785867 | 0.037 | 1            | 3.54E-14               | 28  | AUG   | 2021 | 2    | 56  | 1      |
| 21F15906          | 24.0 % | VS19-109 | Sanidine | N of Drewsey | FCT-NM (4X3-21) | 28.201           | 0.082 | Kuiper et al (2008) | 9.38682            | 0.113 | 0.00165397 | 0.113 | 301.136       | 0.104 | 0.99785867 | 0.037 | 1            | 3.54E-14               | 28  | AUG   | 2021 | 3    | 13  | 1      |
| 21F15907          | 24.0 % | VS19-109 | Sanidine | N of Drewsey | FCT-NM (4X3-21) | 28.201           | 0.082 | Kuiper et al (2008) | 9.38682            | 0.113 | 0.00165397 | 0.113 | 301.136       | 0.104 | 0.99785867 | 0.037 | 1            | 3.54E-14               | 28  | AUG   | 2021 | 3    | 22  | 1      |
| 21F15909          | 24.0 % | VS19-109 | Sanidine | N of Drewsey | FCT-NM (4X3-21) | 28.201           | 0.082 | Kuiper et al (2008) | 9.38682            | 0.113 | 0.00165397 | 0.113 | 301.136       | 0.104 | 0.99785867 | 0.037 | 1            | 3.54E-14               | 28  | AUG   | 2021 | 3    | 39  | 1      |
| 21F15910          | 24.0 % | VS19-109 | Sanidine | N of Drewsey | FCT-NM (4X3-21) | 28.201           | 0.082 | Kuiper et al (2008) | 9.38682            | 0.113 | 0.00165397 | 0.113 | 301.136       | 0.104 | 0.99785867 | 0.037 | 1            | 3.54E-14               | 28  | AUG   | 2021 | 3    | 48  | 1      |
| 21F15912          | 24.0 % | VS19-109 | Sanidine | N of Drewsey | FCT-NM (4X3-21) | 28.201           | 0.082 | Kuiper et al (2008) | 9.38682            | 0.113 | 0.00165397 | 0.113 | 301.136       | 0.104 | 0.99785867 | 0.037 | 1            | 3.54E-14               | 28  | AUG   | 2021 | 4    | 5   | 1      |
| 21F15913          | 24.0 % | VS19-109 | Sanidine | N of Drewsey | FCT-NM (4X3-21) | 28.201           | 0.082 | Kuiper et al (2008) | 9.38682            | 0.113 | 0.00165397 | 0.113 | 301.136       | 0.104 | 0.99785867 | 0.037 | 1            | 3.54E-14               | 28  | AUG   | 2021 | 4    | 13  | 1      |
| 21F15915          | 24.0 % | VS19-109 | Sanidine | N of Drewsey | FCT-NM (4X3-21) | 28.201           | 0.082 | Kuiper et al (2008) | 9.38682            | 0.113 | 0.00165397 | 0.113 | 301.136       | 0.104 | 0.99785867 | 0.037 | 1            | 3.54E-14               | 28  | AUG   | 2021 | 4    | 31  | 1      |
| 21F15916          | 24.0 % | VS19-109 | Sanidine | N of Drewsey | FCT-NM (4X3-21) | 28.201           | 0.082 | Kuiper et al (2008) | 9.38682            | 0.113 | 0.00165397 | 0.113 | 301.136       | 0.104 | 0.99785867 | 0.037 | 1            | 3.54E-14               | 28  | AUG   | 2021 | 4    | 39  | 1      |



21F15869.AGE >>> VS19-109 >>> OREGON | SWENTON (20-01) PROJECT

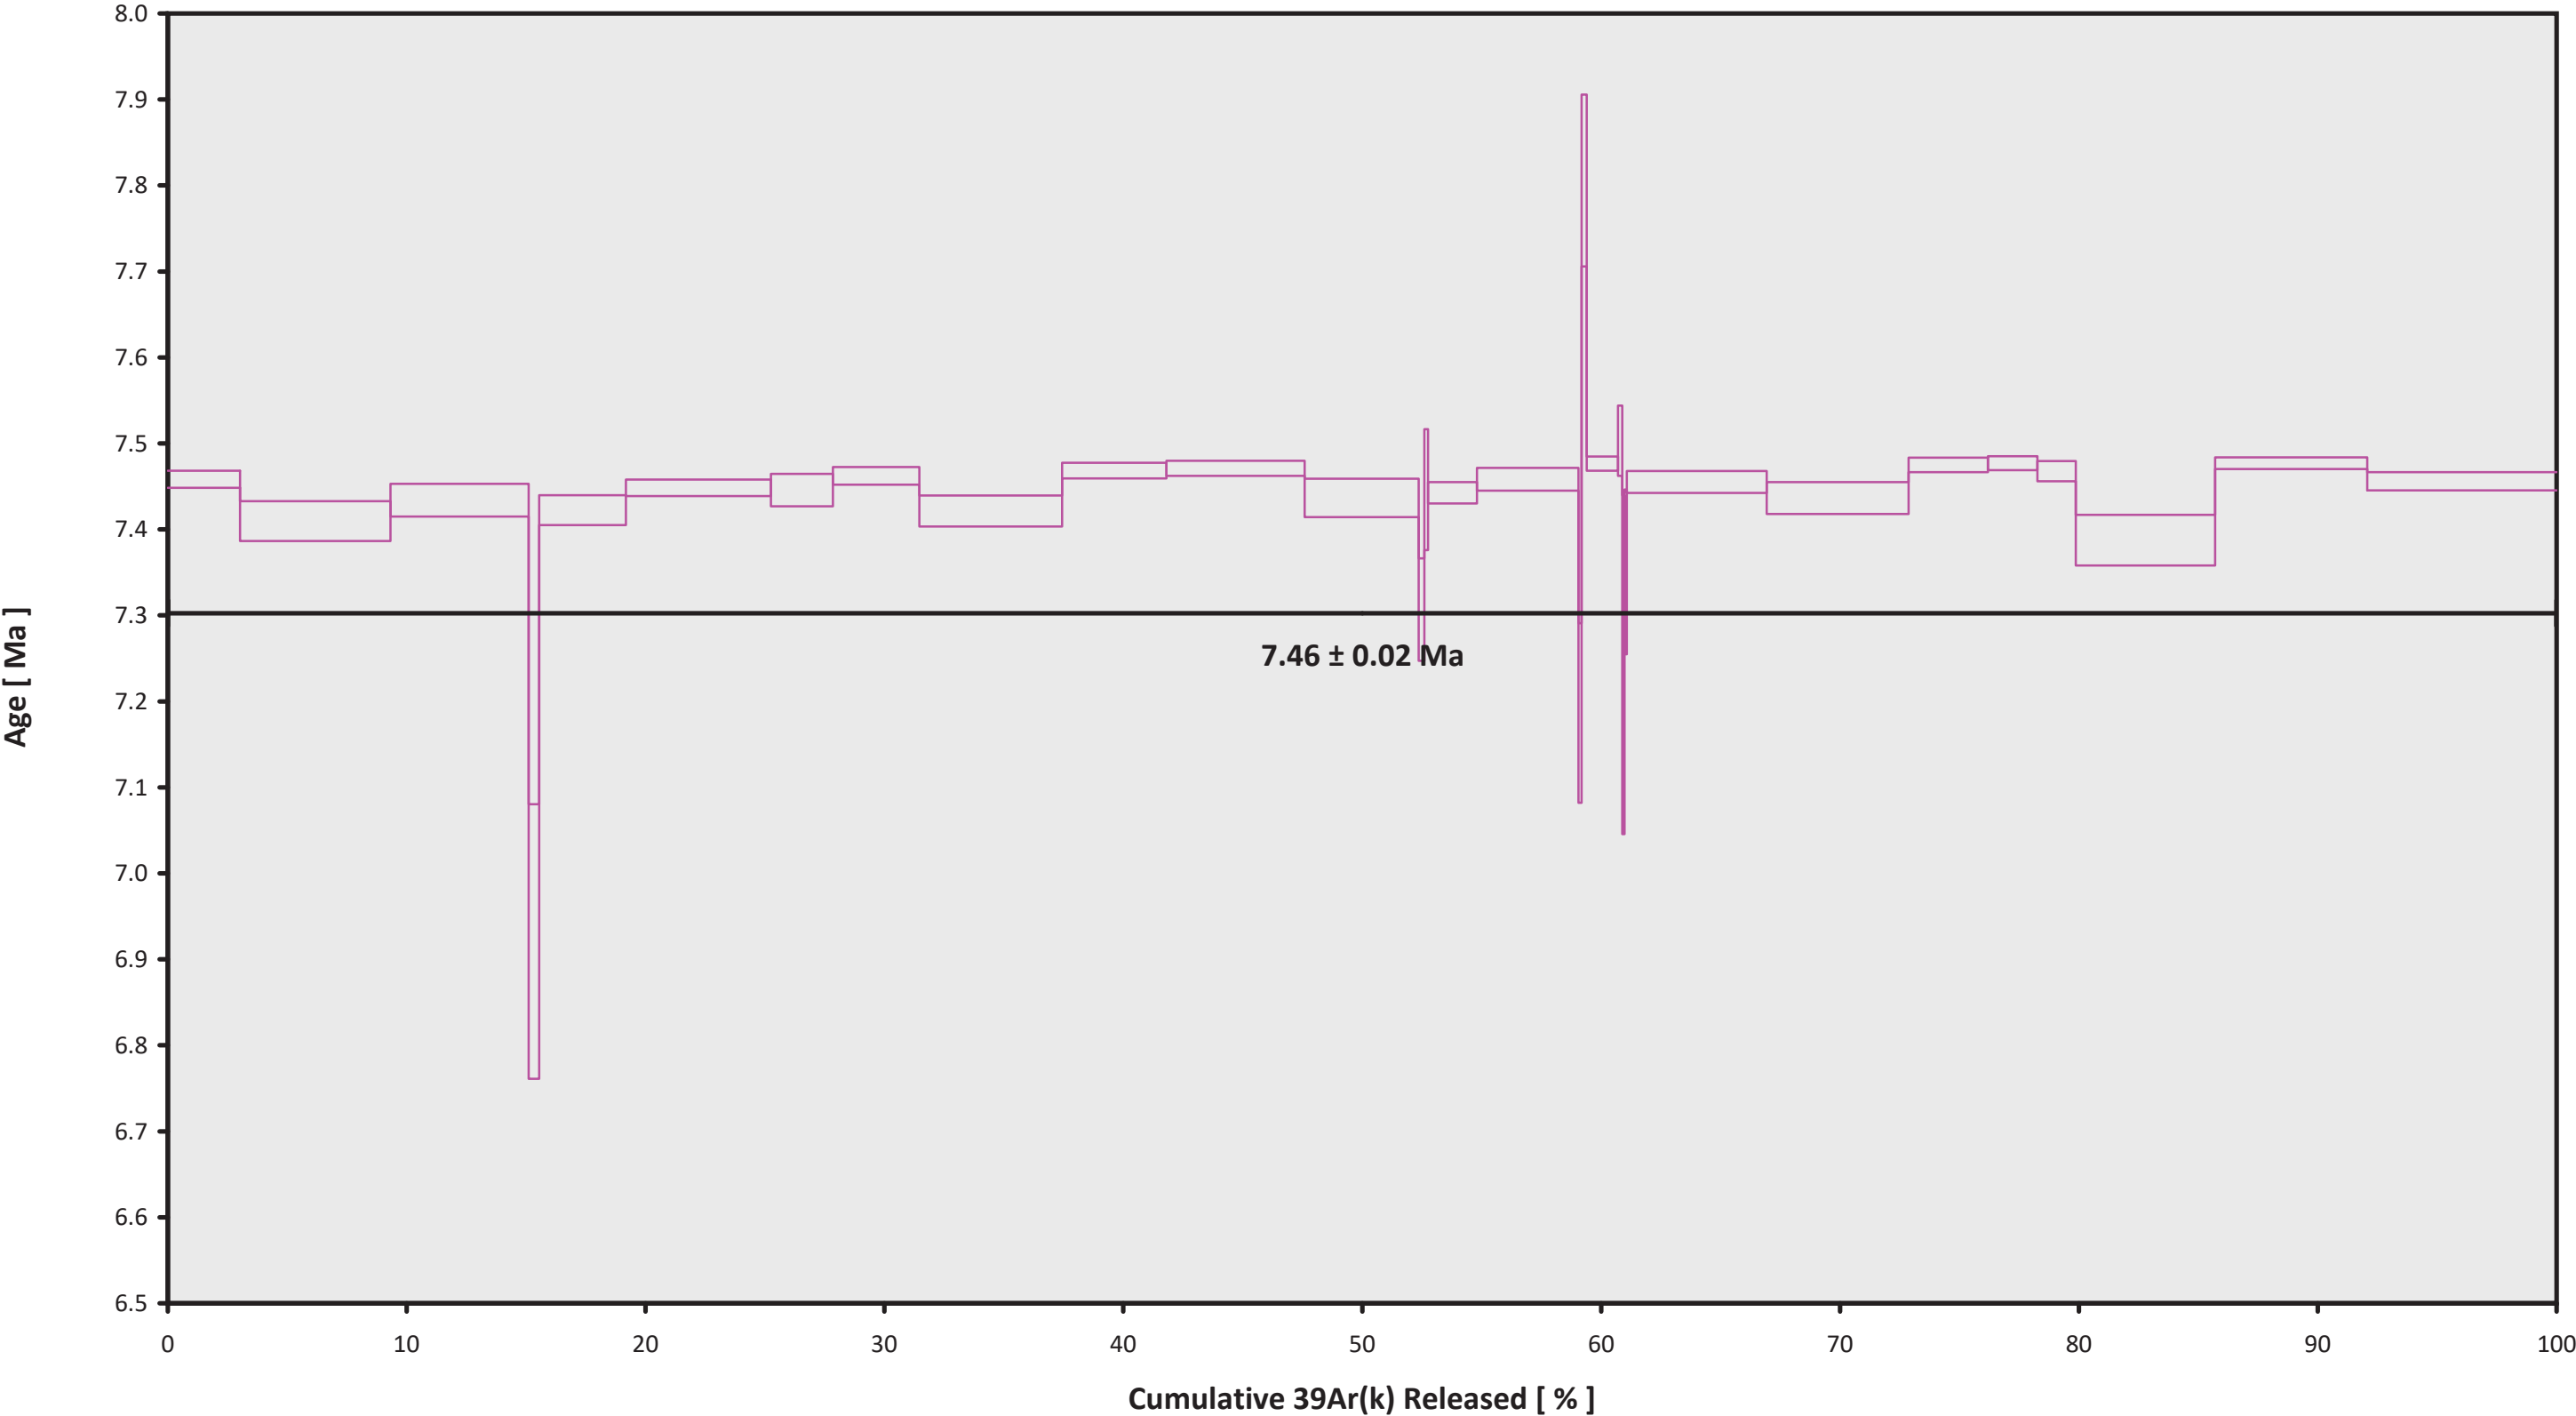

Ar-Ages in Ma

WEIGHTED PLATEAU

7.46 ± 0.02

TOTAL FUSION

7.44 ± 0.02

NORMAL ISOCHRON

7.48 ± 0.02

INVERSE ISOCHRON

7.48 ± 0.02

MSWD (PROBABILITY)

8.60 (0%)

ASSUMED TRAPPED 40AR/36AR RATIO

Standard 40/36 = 298.56 ± 0.104 %SD

Sample Info

Sanidine

N of Drewsey

Dan Miggins

IRR = 21-OSU-04 (4X3-21)

J = 0.00165397 ± 0.00000187

21F15869.AGE >>> VS19-109 >>> OREGON | SWENTON (20-01) PROJECT

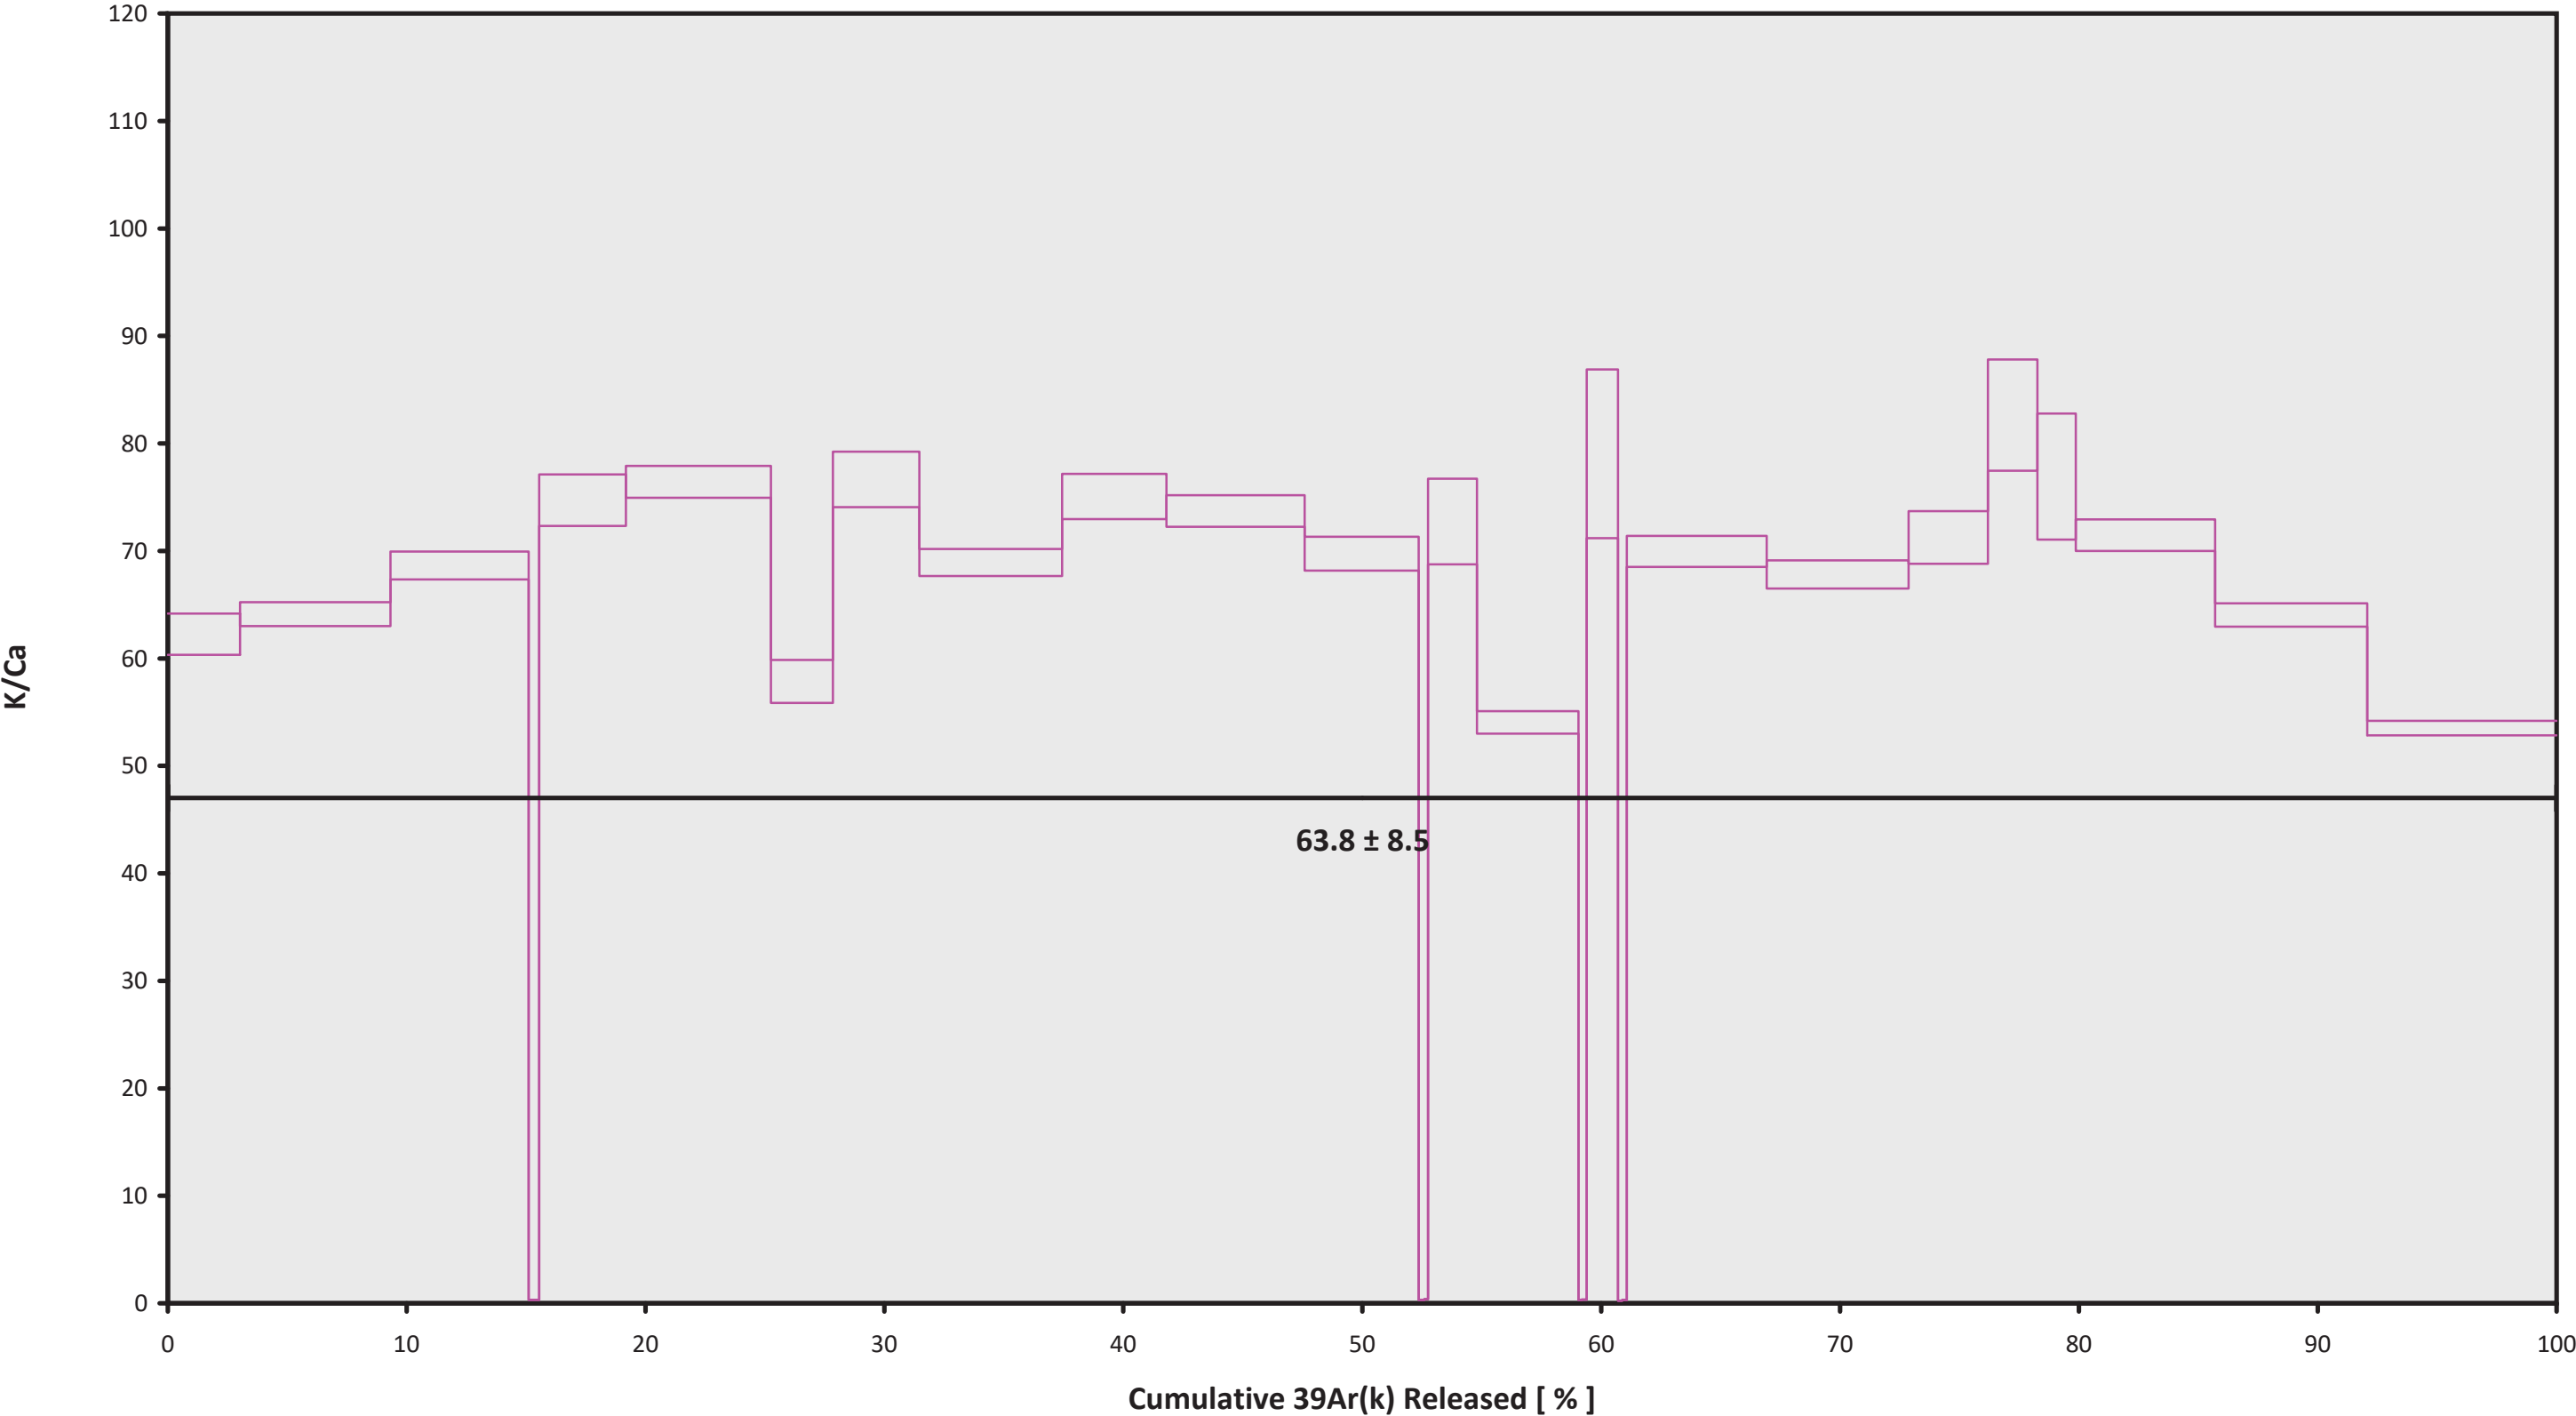

Ar-Ages in Ma

WEIGHTED PLATEAU

7.46 ± 0.02

TOTAL FUSION

7.44 ± 0.02

NORMAL ISOCHRON

7.48 ± 0.02

INVERSE ISOCHRON

7.48 ± 0.02

ASSUMED TRAPPED  $^{40}\text{Ar}/^{36}\text{Ar}$  RATIO

Standard  $^{40}\text{Ar}/^{36}\text{Ar} = 298.56 \pm 0.104$  %SD

Sample Info

Sanidine

N of Drewsey

Dan Miggins

IRR = 21-OSU-04 (4X3-21)

J = 0.00165397 ± 0.00000187

21F15869.AGE >>> VS19-109 >>> OREGON | SWENTON (20-01) PROJECT

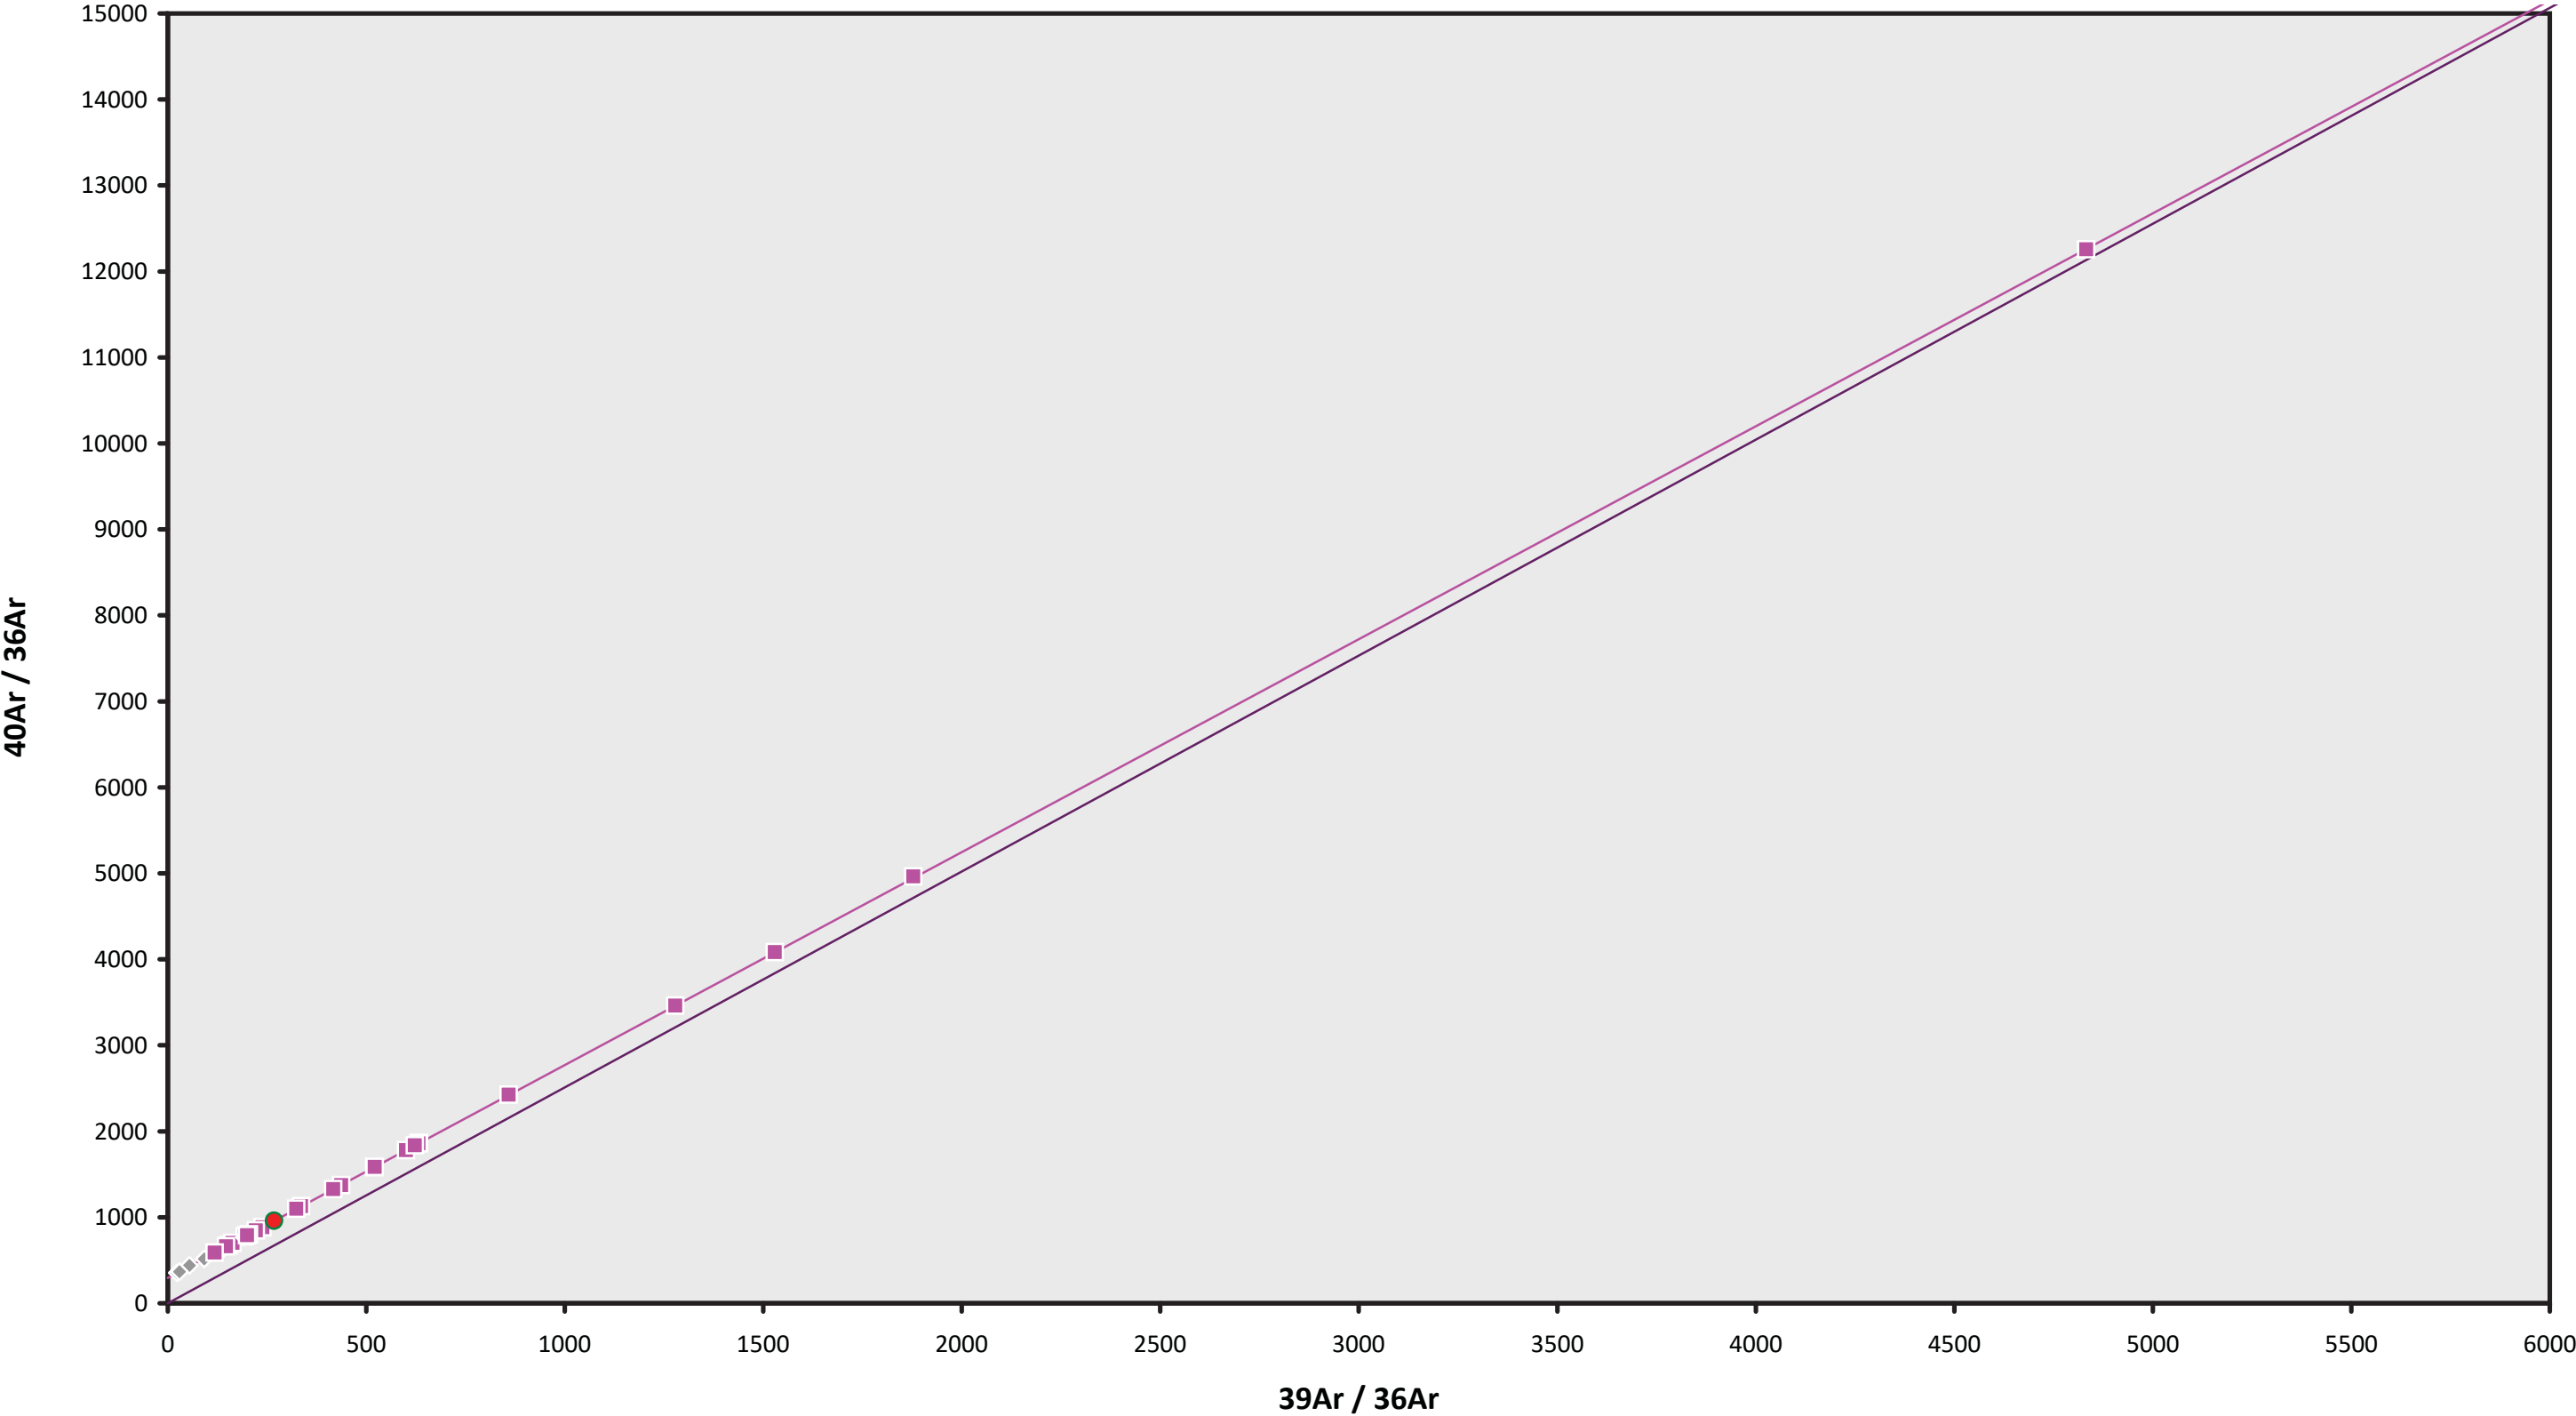

Ar-Ages in Ma

WEIGHTED PLATEAU

7.46 ± 0.02

TOTAL FUSION

7.44 ± 0.02

NORMAL ISOCHRON

7.48 ± 0.02

INVERSE ISOCHRON

7.48 ± 0.02

MSWD (PROBABILITY)

1.93 (1%)

CALCULATED 40AR/36AR INTERCEPT

295.1 ± 0.7

Sample Info

Sanidine

N of Drewsey

Dan Miggins

IRR = 21-OSU-04 (4X3-21)

J = 0.00165397 ± 0.00000187



21F15869.AGE >>> VS19-109 >>> OREGON | SWENTON (20-01) PROJECT

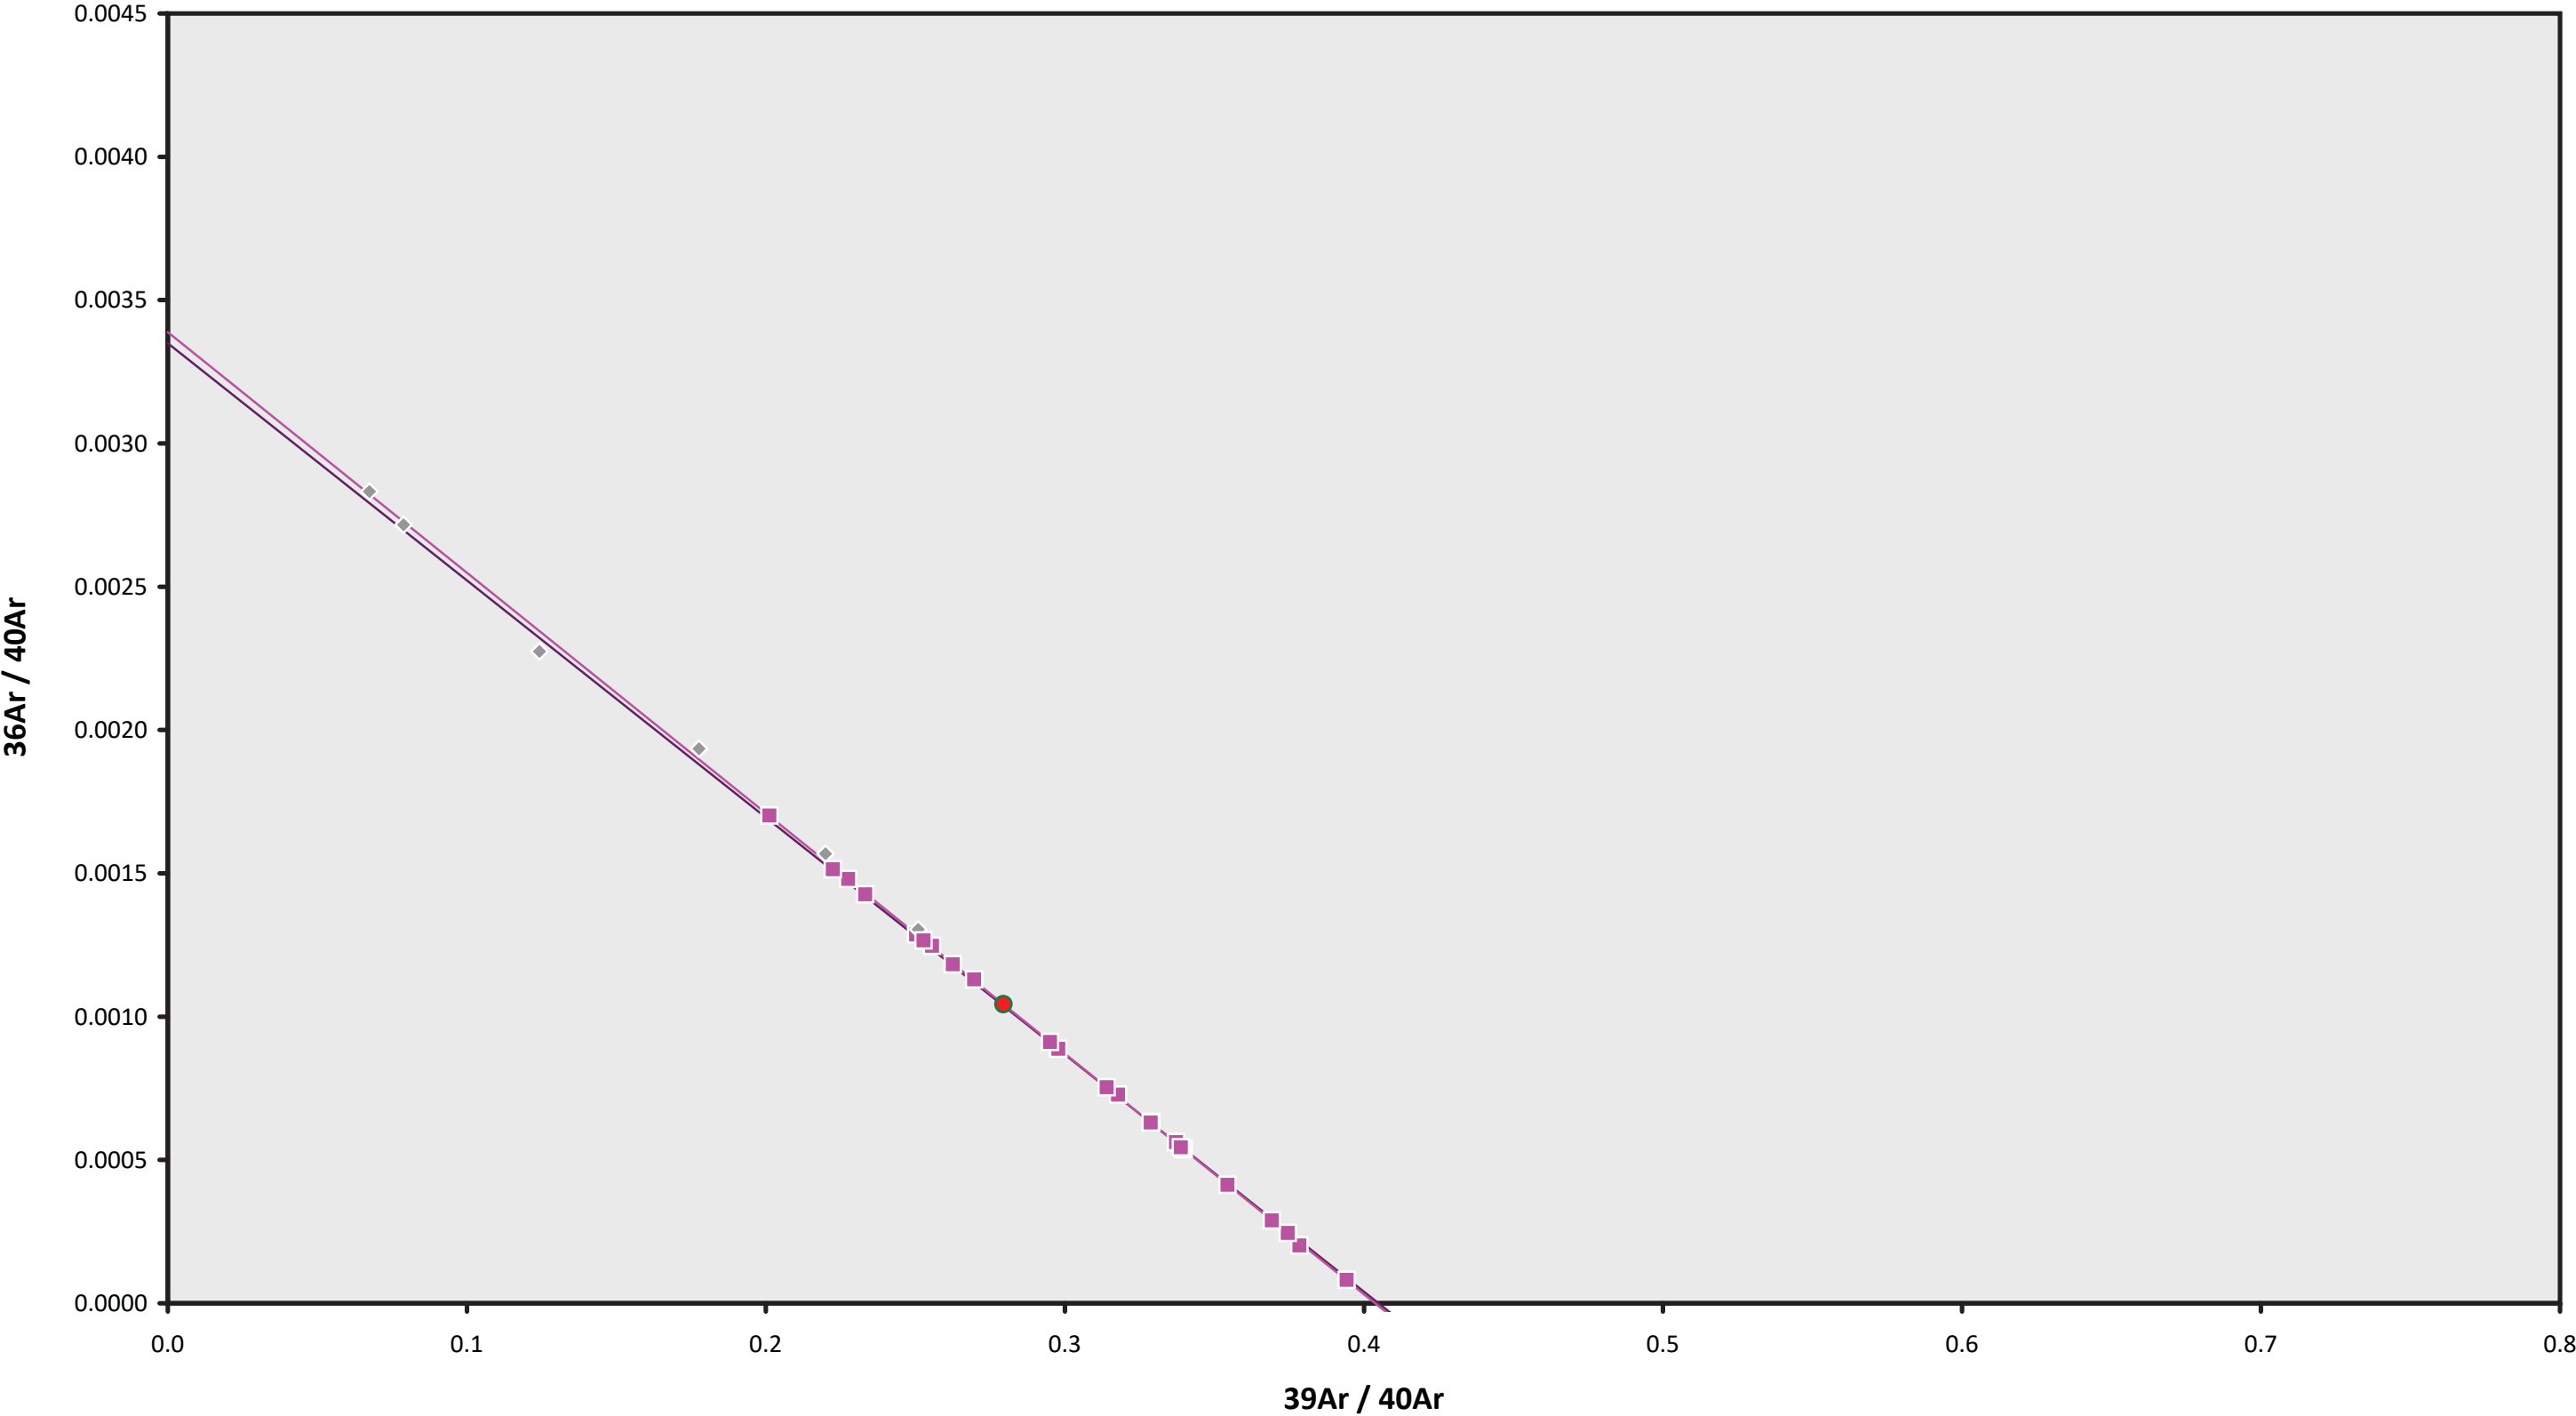

Ar-Ages in Ma

WEIGHTED PLATEAU

$7.46 \pm 0.02$

TOTAL FUSION

$7.44 \pm 0.02$

NORMAL ISOCHRON

$7.48 \pm 0.02$

INVERSE ISOCHRON

$7.48 \pm 0.02$

MSWD (PROBABILITY)

1.93 (1%)

SPREADING FACTOR

47.8%

CALCULATED  $^{40}\text{Ar}/^{36}\text{Ar}$  INTERCEPT

$295.1 \pm 0.7$

Sample Info

Sanidine

N of Drewsey

Dan Miggins

IRR = 21-OSU-04 (4X3-21)

$J = 0.00165397 \pm 0.00000187$

| Relative Abundances |        |   | 36Ar<br>[fA] | %1σ   | 37Ar<br>[fA] | %1σ    | 38Ar<br>[fA] | %1σ   | 39Ar<br>[fA] | %1σ   | 40Ar<br>[fA] | %1σ   | 40(r)/39(k) ± 2σ | Age ± 2σ<br>(Ma) | 40Ar(r)<br>(%) | 39Ar(k)<br>(%) | K/Ca ± 2σ   |
|---------------------|--------|---|--------------|-------|--------------|--------|--------------|-------|--------------|-------|--------------|-------|------------------|------------------|----------------|----------------|-------------|
| 20F23960            | 17.0 % | ✓ | 0.0564699    | 0.801 | 3.940927     | 3.255  | 1.243371     | 0.790 | 102.9121     | 0.042 | 545.7866     | 0.006 | 5.14221 ±0.00515 | 14.78 ±0.01      | 96.96          | 7.87           | 11.23 ±0.73 |
| 20F23961            | 17.0 % | ✓ | 0.0181028    | 1.882 | 2.589120     | 5.108  | 0.637699     | 1.417 | 53.6282      | 0.046 | 281.0518     | 0.011 | 5.14341 ±0.00616 | 14.79 ±0.02      | 98.14          | 4.10           | 8.91 ±0.91  |
| 20F23963            | 17.0 % | ✓ | 0.0122589    | 2.455 | 2.957115     | 4.293  | 0.193151     | 4.832 | 15.8560      | 0.077 | 84.7641      | 0.030 | 5.13009 ±0.01424 | 14.75 ±0.04      | 95.95          | 1.21           | 2.31 ±0.20  |
| 20F23964            | 17.0 % | ✓ | 0.0227873    | 1.463 | 1.412280     | 8.827  | 0.095905     | 9.560 | 7.8316       | 0.124 | 46.9570      | 0.049 | 5.14167 ±0.02920 | 14.78 ±0.08      | 85.74          | 0.60           | 2.38 ±0.42  |
| 20F23966            | 17.0 % | ✓ | 0.0360246    | 1.118 | 3.508731     | 4.230  | 0.897049     | 0.972 | 74.4664      | 0.044 | 393.3963     | 0.008 | 5.14178 ±0.00569 | 14.78 ±0.02      | 97.33          | 5.69           | 9.13 ±0.77  |
| 20F23967            | 17.0 % | ✓ | 0.0295175    | 1.354 | 8.159497     | 1.784  | 1.020570     | 0.885 | 85.7730      | 0.043 | 448.9368     | 0.008 | 5.13865 ±0.00530 | 14.77 ±0.02      | 98.17          | 6.56           | 4.52 ±0.16  |
| 20F23969            | 17.0 % | ✓ | 0.0318134    | 1.260 | 4.111927     | 3.079  | 1.157922     | 0.803 | 94.8718      | 0.044 | 497.0719     | 0.008 | 5.14233 ±0.00525 | 14.78 ±0.02      | 98.14          | 7.25           | 9.92 ±0.61  |
| 20F23970            | 17.0 % | ✓ | 0.0314984    | 1.131 | 5.514927     | 2.326  | 0.462323     | 1.898 | 37.7189      | 0.050 | 202.7727     | 0.014 | 5.13825 ±0.00782 | 14.77 ±0.02      | 95.57          | 2.88           | 2.94 ±0.14  |
| 20F23972            | 17.0 % |   | 0.0674122    | 0.742 | 6.283266     | 2.188  | 0.465850     | 1.972 | 37.6324      | 0.050 | 228.6715     | 0.013 | 5.55510 ±0.00990 | 15.96 ±0.03      | 91.41          | 2.88           | 2.58 ±0.11  |
| 20F23973            | 17.0 % | ✓ | 0.0048126    | 5.757 | 5.326926     | 2.412  | 0.328890     | 2.911 | 27.4980      | 0.057 | 141.9076     | 0.018 | 5.12406 ±0.00858 | 14.73 ±0.02      | 99.28          | 2.10           | 2.22 ±0.11  |
| 20F23975            | 17.0 % | ✓ | 0.0568254    | 0.746 | 2.128018     | 6.236  | 0.428364     | 2.193 | 34.3079      | 0.051 | 193.9975     | 0.014 | 5.16469 ±0.00929 | 14.85 ±0.03      | 91.33          | 2.62           | 6.93 ±0.86  |
| 20F23976            | 17.0 % | ✓ | 0.0270738    | 1.358 | 7.797399     | 1.821  | 0.202350     | 4.718 | 16.0410      | 0.073 | 90.3021      | 0.026 | 5.16579 ±0.01599 | 14.85 ±0.05      | 91.74          | 1.23           | 0.88 ±0.03  |
| 20F23978            | 17.0 % | ✓ | 0.0162058    | 2.114 | 5.577081     | 2.465  | 0.285383     | 3.215 | 23.9105      | 0.061 | 127.0956     | 0.022 | 5.13210 ±0.01088 | 14.75 ±0.03      | 96.54          | 1.83           | 1.84 ±0.09  |
| 20F23979            | 17.0 % | ✓ | 0.0181341    | 1.863 | 1.919665     | 6.750  | 0.157607     | 5.506 | 13.7438      | 0.084 | 76.3068      | 0.034 | 5.16927 ±0.01752 | 14.86 ±0.05      | 93.10          | 1.05           | 3.08 ±0.42  |
| 20F23981            | 17.0 % | ✓ | 0.0190673    | 1.764 | 1.198046     | 11.599 | 0.125655     | 7.243 | 9.8241       | 0.106 | 56.1752      | 0.046 | 5.14830 ±0.02391 | 14.80 ±0.07      | 90.03          | 0.75           | 3.53 ±0.82  |
| 20F23982            | 17.0 % | ✓ | 0.0341136    | 1.044 | 2.313624     | 5.281  | 0.706149     | 1.338 | 58.6818      | 0.046 | 311.4403     | 0.011 | 5.13642 ±0.00609 | 14.77 ±0.02      | 96.78          | 4.49           | 10.91 ±1.15 |
| 20F23984            | 17.0 % | ✓ | 0.0234820    | 1.579 | 3.466316     | 3.753  | 0.675356     | 1.229 | 56.2291      | 0.046 | 295.6157     | 0.010 | 5.13724 ±0.00625 | 14.77 ±0.02      | 97.71          | 4.30           | 6.97 ±0.52  |
| 20F23985            | 17.0 % | ✓ | 0.0191991    | 1.940 | 2.541941     | 5.110  | 0.889201     | 0.957 | 73.6698      | 0.044 | 384.2519     | 0.009 | 5.14035 ±0.00554 | 14.78 ±0.02      | 98.55          | 5.63           | 12.46 ±1.27 |
| 20F23987            | 17.0 % | ✓ | 0.0397371    | 0.939 | 3.133545     | 4.315  | 0.830399     | 1.148 | 66.9784      | 0.046 | 356.0635     | 0.009 | 5.14230 ±0.00584 | 14.78 ±0.02      | 96.73          | 5.12           | 9.19 ±0.79  |
| 20F23988            | 17.0 % | ✓ | 0.0318090    | 1.237 | 3.544799     | 4.058  | 0.863529     | 1.073 | 70.1562      | 0.045 | 370.1724     | 0.008 | 5.14469 ±0.00580 | 14.79 ±0.02      | 97.50          | 5.36           | 8.51 ±0.69  |
| 20F23990            | 17.0 % | ✓ | 0.0060866    | 4.758 | 1.380803     | 9.609  | 0.442275     | 2.008 | 37.3471      | 0.049 | 194.0145     | 0.015 | 5.14874 ±0.00701 | 14.80 ±0.02      | 99.11          | 2.86           | 11.63 ±2.24 |
| 20F23991            | 17.0 % | ✓ | 0.0095333    | 3.253 | 3.719013     | 3.486  | 0.571126     | 1.608 | 47.7487      | 0.048 | 247.8999     | 0.012 | 5.13809 ±0.00642 | 14.77 ±0.02      | 98.96          | 3.65           | 5.52 ±0.38  |
| 20F23993            | 17.0 % | ✓ | 0.0372720    | 1.089 | 2.691962     | 4.940  | 0.654806     | 1.523 | 53.3620      | 0.047 | 284.9975     | 0.011 | 5.13593 ±0.00676 | 14.76 ±0.02      | 96.16          | 4.08           | 8.52 ±0.84  |
| 20F23994            | 17.0 % | ✓ | 0.0304157    | 1.272 | 2.571735     | 5.236  | 0.715162     | 1.337 | 57.2210      | 0.046 | 303.6844     | 0.010 | 5.15171 ±0.00633 | 14.81 ±0.02      | 97.07          | 4.38           | 9.57 ±1.00  |
| 20F23996            | 17.0 % | ✓ | 0.0100080    | 2.858 | 1.962912     | 6.314  | 0.655084     | 1.323 | 53.0316      | 0.046 | 275.5090     | 0.011 | 5.14136 ±0.00587 | 14.78 ±0.02      | 98.96          | 4.06           | 11.62 ±1.47 |
| 20F23997            | 17.0 % | ✓ | 0.0180201    | 1.609 | 1.130865     | 10.804 | 0.381773     | 2.282 | 31.0234      | 0.053 | 164.2695     | 0.016 | 5.12407 ±0.00799 | 14.73 ±0.02      | 96.77          | 2.37           | 11.80 ±2.55 |
| 20F23999            | 17.0 % | ✓ | 0.0262540    | 1.350 | 0.602618     | 20.939 | 0.227259     | 3.601 | 17.4666      | 0.069 | 97.4852      | 0.025 | 5.13480 ±0.01441 | 14.76 ±0.04      | 92.00          | 1.34           | 12.46 ±5.22 |
| 20F24000            | 17.0 % | ✓ | 0.0074251    | 4.062 | 2.382256     | 5.538  | 0.610193     | 1.459 | 48.8321      | 0.047 | 253.4473     | 0.013 | 5.14830 ±0.00624 | 14.80 ±0.02      | 99.19          | 3.73           | 8.81 ±0.98  |

Σ 0.7413597 0.259 93.867313 0.747 15.924402 0.303 1307.7634 0.010 6954.0448 0.002

| Information on Analysis and Constants Used in Calculations                                                                                                                                                                                                                                                                                                                                                                                                                                                                                                                                                                                                                                                                                                                                                                                                                                                                                                                                                                         |                                                                                                                                                                                                                                                                                                                                                                                                                                                                                                                                                                                                                                                                                                                                                                                                                                                                                                                                                                                                                        |
|------------------------------------------------------------------------------------------------------------------------------------------------------------------------------------------------------------------------------------------------------------------------------------------------------------------------------------------------------------------------------------------------------------------------------------------------------------------------------------------------------------------------------------------------------------------------------------------------------------------------------------------------------------------------------------------------------------------------------------------------------------------------------------------------------------------------------------------------------------------------------------------------------------------------------------------------------------------------------------------------------------------------------------|------------------------------------------------------------------------------------------------------------------------------------------------------------------------------------------------------------------------------------------------------------------------------------------------------------------------------------------------------------------------------------------------------------------------------------------------------------------------------------------------------------------------------------------------------------------------------------------------------------------------------------------------------------------------------------------------------------------------------------------------------------------------------------------------------------------------------------------------------------------------------------------------------------------------------------------------------------------------------------------------------------------------|
| Project = <b>SWENTON (20-01)</b><br>Sample = <b>VS19-116</b><br>Material = <b>Sanidine</b><br>Location = <b>Rhyolite Dome</b><br>Region = <b>Eastern Oregon</b><br>Analyst = <b>Dan Miggins</b><br>Irradiation = <b>20-OSU-01 (1C47-20)</b><br>Position = <b>X: 0   Y: 0   Z/H: 57.20731 mm</b><br>FCT-NM Age = <b>28.201 ± 0.023 Ma</b><br>FCT-NM Reference = <b>Kuiper et al (2008)</b><br>FCT-NM 40Ar/39Ar Ratio = <b>9.84623 ± 0.01487</b><br>FCT-NMJ -value = <b>0.00157680 ± 0.00000238</b><br>Air Shot 40Ar/36Ar = <b>298.3780 ± 0.3670</b><br>Air Shot MDF = <b>1.00015269 ± 0.00040345 (LIN)</b><br>Experiment Type = <b>Total Fusion</b><br>Extraction Method = <b>Single Crystal Laser Heating</b><br>Heating = <b>62 sec</b><br>Isolation = <b>1.62 min</b><br>Instrument = <b>ARGUS-VI-F</b><br>Preferred Age = <b>Ideogram Age</b><br>Age Classification = <b>Eruption Age</b><br>IGSN = <b>Undefined</b><br>Rock Class = <b>Undefined</b><br>Lithology = <b>Undefined</b><br>Lat-Lon = <b>Undefined - Undefined</b> | Age Equations = <b>Min et al. (2000)</b><br>Negative Intensities = <b>Allowed</b><br>Collector Calibrations = <b>36Ar</b><br>Decay 40K = <b>5.463 ± 0.107 E-10 1/a</b><br>Decay 39Ar = <b>2.940 ± 0.016 E-07 1/h</b><br>Decay 37Ar = <b>8.230 ± 0.012 E-04 1/h</b><br>Decay 36Cl = <b>2.257 ± 0.015 E-06 1/a</b><br>Decay 40K(EC,β <sup>+</sup> ) = <b>0.580 ± 0.014 E-10 1/a</b><br>Decay 40K(β <sup>-</sup> ) = <b>4.884 ± 0.099 E-10 1/a</b><br>Atmospheric 40/36(a) = <b>298.56 ± 0.31</b><br>Atmospheric 38/36(a) = <b>0.1885 ± 0.0003</b><br>Production 39/37(ca) = <b>0.0006425 ± 0.0000059</b><br>Production 38/37(ca) = <b>0.0001800 ± 0.0000173</b><br>Production 36/37(ca) = <b>0.0002703 ± 0.0000005</b><br>Production 40/39(k) = <b>0.000607 ± 0.000059</b><br>Production 38/39(k) = <b>0.012077 ± 0.000011</b><br>Production 36/38(cl) = <b>262.80 ± 1.71</b><br>Scaling Ratio K/Ca = <b>0.430</b><br>Abundance Ratio 40K/K = <b>1.1700 ± 0.0100 E-04</b><br>Atomic Weight K = <b>39.0983 ± 0.0001 g</b> |

| Results                                | 40(a)/36(a) ± 2σ                     | 40(r)/39(k) ± 2σ           | Age ± 2σ<br>(Ma)                                                  | M <sub>SWD</sub>  | 39Ar(k)<br>(%,n)                                         | K/Ca ± 2σ  |
|----------------------------------------|--------------------------------------|----------------------------|-------------------------------------------------------------------|-------------------|----------------------------------------------------------|------------|
| Age Plateau<br><b>Error Mean</b>       |                                      | 5.14141 ±0.00290<br>±0.06% | <b>14.78 ±0.05</b><br><b>±0.31%</b>                               | 4.55<br>0%        | 97.12<br>27                                              | 1.45 ±0.52 |
|                                        |                                      |                            | <b>Full External Error</b> ±0.77<br><b>Analytical Error</b> ±0.01 | 1.55<br>2.1333    | <b>2σ Confidence Limit</b><br><b>Error Magnification</b> |            |
| Total Fusion Age                       |                                      | 5.15369 ±0.00137<br>±0.03% | <b>14.82 ±0.04</b><br><b>±0.30%</b>                               |                   | 28                                                       | 5.99 ±0.09 |
|                                        |                                      |                            | <b>Full External Error</b> ±0.77<br><b>Analytical Error</b> ±0.00 |                   |                                                          |            |
| Normal Isochron<br><b>Error Chron</b>  | <b>305.88 ±8.87</b><br><b>±2.90%</b> | 5.13762 ±0.00499<br>±0.10% | <b>14.77 ±0.05</b><br><b>±0.32%</b>                               | 4.35<br>0%        | 97.12<br>27                                              |            |
|                                        |                                      |                            | <b>Full External Error</b> ±0.77<br><b>Analytical Error</b> ±0.01 | 1.57<br>2.0846    | <b>2σ Confidence Limit</b><br><b>Error Magnification</b> |            |
|                                        |                                      |                            |                                                                   | 1<br>0.0000003454 | <b>Number of Iterations</b><br><b>Convergence</b>        |            |
| Inverse Isochron<br><b>Error Chron</b> | <b>306.38 ±8.67</b><br><b>±2.83%</b> | 5.13783 ±0.00487<br>±0.09% | <b>14.77 ±0.05</b><br><b>±0.32%</b>                               | 4.19<br>0%        | 97.12<br>27                                              |            |
|                                        |                                      |                            | <b>Full External Error</b> ±0.77<br><b>Analytical Error</b> ±0.01 | 1.57<br>2.0463    | <b>2σ Confidence Limit</b><br><b>Error Magnification</b> |            |
|                                        |                                      |                            |                                                                   | 3<br>0.0000234004 | <b>Number of Iterations</b><br><b>Convergence</b>        |            |
|                                        |                                      |                            |                                                                   | 14%               | <b>Spreading Factor</b>                                  |            |

| Incremental Heating |        |   | 36Ar(a)<br>[fA] | 37Ar(ca)<br>[fA] | 38Ar(cl)<br>[fA] | 39Ar(k)<br>[fA] | 40Ar(r)<br>[fA] | Age ± 2σ<br>(Ma) | 40Ar(r)<br>(%) | 39Ar(k)<br>(%) | K/Ca ± 2σ   |
|---------------------|--------|---|-----------------|------------------|------------------|-----------------|-----------------|------------------|----------------|----------------|-------------|
| 20F23960            | 17.0 % | ✓ | 0.0554046       | 3.940927         | 0.0000000        | 102.9095        | 529.1825        | 14.78 ±0.01      | 96.96          | 7.87           | 11.23 ±0.73 |
| 20F23961            | 17.0 % | ✓ | 0.0174030       | 2.589120         | 0.0000000        | 53.6265         | 275.8234        | 14.79 ±0.02      | 98.14          | 4.10           | 8.91 ±0.91  |
| 20F23963            | 17.0 % | ✓ | 0.0114596       | 2.957115         | 0.0000000        | 15.8541         | 81.3331         | 14.75 ±0.04      | 95.95          | 1.21           | 2.31 ±0.20  |
| 20F23964            | 17.0 % | ✓ | 0.0224055       | 1.412280         | 0.0000000        | 7.8307          | 40.2629         | 14.78 ±0.08      | 85.74          | 0.60           | 2.38 ±0.42  |
| 20F23966            | 17.0 % | ✓ | 0.0350762       | 3.508731         | 0.0000000        | 74.4642         | 382.8787        | 14.78 ±0.02      | 97.33          | 5.69           | 9.13 ±0.77  |
| 20F23967            | 17.0 % | ✓ | 0.0273120       | 8.159497         | 0.0000000        | 85.7678         | 440.7305        | 14.77 ±0.02      | 98.17          | 6.56           | 4.52 ±0.16  |
| 20F23969            | 17.0 % | ✓ | 0.0307007       | 4.111927         | 0.0056601        | 94.8691         | 487.8483        | 14.78 ±0.02      | 98.14          | 7.25           | 9.92 ±0.61  |
| 20F23970            | 17.0 % | ✓ | 0.0300077       | 5.514927         | 0.0001863        | 37.7153         | 193.7908        | 14.77 ±0.02      | 95.57          | 2.88           | 2.94 ±0.14  |
| 20F23972            | 17.0 % |   | 0.0657139       | 6.283266         | 0.0000000        | 37.6283         | 209.0291        | 15.96 ±0.03      | 91.41          | 2.88           | 2.58 ±0.11  |
| 20F23973            | 17.0 % | ✓ | 0.0033727       | 5.326926         | 0.0000000        | 27.4946         | 140.8840        | 14.73 ±0.02      | 99.28          | 2.10           | 2.22 ±0.11  |
| 20F23975            | 17.0 % | ✓ | 0.0562495       | 2.128018         | 0.0030581        | 34.3066         | 177.1828        | 14.85 ±0.03      | 91.33          | 2.62           | 6.93 ±0.86  |
| 20F23976            | 17.0 % | ✓ | 0.0249656       | 7.797399         | 0.0025738        | 16.0360         | 82.8386         | 14.85 ±0.05      | 91.74          | 1.23           | 0.88 ±0.03  |
| 20F23978            | 17.0 % | ✓ | 0.0146983       | 5.577081         | 0.0000000        | 23.9069         | 122.6928        | 14.75 ±0.03      | 96.54          | 1.83           | 1.84 ±0.09  |
| 20F23979            | 17.0 % | ✓ | 0.0176152       | 1.919665         | 0.0000000        | 13.7426         | 71.0393         | 14.86 ±0.05      | 93.10          | 1.05           | 3.08 ±0.42  |
| 20F23981            | 17.0 % | ✓ | 0.0187427       | 1.198046         | 0.0032700        | 9.8233          | 50.5734         | 14.80 ±0.07      | 90.03          | 0.75           | 3.53 ±0.82  |
| 20F23982            | 17.0 % | ✓ | 0.0334883       | 2.313624         | 0.0000000        | 58.6803         | 301.4065        | 14.77 ±0.02      | 96.78          | 4.49           | 10.91 ±1.15 |
| 20F23984            | 17.0 % | ✓ | 0.0225450       | 3.466316         | 0.0000000        | 56.2268         | 288.8505        | 14.77 ±0.02      | 97.71          | 4.30           | 6.97 ±0.52  |
| 20F23985            | 17.0 % | ✓ | 0.0185120       | 2.541941         | 0.0000000        | 73.6681         | 378.6803        | 14.78 ±0.02      | 98.55          | 5.63           | 12.46 ±1.27 |
| 20F23987            | 17.0 % | ✓ | 0.0388870       | 3.133545         | 0.0136308        | 66.9764         | 344.4127        | 14.78 ±0.02      | 96.73          | 5.12           | 9.19 ±0.79  |
| 20F23988            | 17.0 % | ✓ | 0.0308486       | 3.544799         | 0.0098276        | 70.1539         | 360.9197        | 14.79 ±0.02      | 97.50          | 5.36           | 8.51 ±0.69  |
| 20F23990            | 17.0 % | ✓ | 0.0057133       | 1.380803         | 0.0000000        | 37.3462         | 192.2860        | 14.80 ±0.02      | 99.11          | 2.86           | 11.63 ±2.24 |
| 20F23991            | 17.0 % | ✓ | 0.0085281       | 3.719013         | 0.0000000        | 47.7463         | 245.3248        | 14.77 ±0.02      | 98.96          | 3.65           | 5.52 ±0.38  |
| 20F23993            | 17.0 % | ✓ | 0.0365437       | 2.691962         | 0.0030011        | 53.3602         | 274.0546        | 14.76 ±0.02      | 96.16          | 4.08           | 8.52 ±0.84  |
| 20F23994            | 17.0 % | ✓ | 0.0297164       | 2.571735         | 0.0180598        | 57.2193         | 294.7776        | 14.81 ±0.02      | 97.07          | 4.38           | 9.57 ±1.00  |
| 20F23996            | 17.0 % | ✓ | 0.0094745       | 1.962912         | 0.0124971        | 53.0304         | 272.6481        | 14.78 ±0.02      | 98.96          | 4.06           | 11.62 ±1.47 |
| 20F23997            | 17.0 % | ✓ | 0.0177136       | 1.130865         | 0.0035704        | 31.0226         | 158.9621        | 14.73 ±0.02      | 96.77          | 2.37           | 11.80 ±2.55 |
| 20F23999            | 17.0 % | ✓ | 0.0260885       | 0.602618         | 0.0112930        | 17.4662         | 89.6856         | 14.76 ±0.04      | 92.00          | 1.34           | 12.46 ±5.22 |
| 20F24000            | 17.0 % | ✓ | 0.0067769       | 2.382256         | 0.0187600        | 48.8305         | 251.3944        | 14.80 ±0.02      | 99.19          | 3.73           | 8.81 ±0.98  |
| Σ                   |        |   | 0.7159632       | 93.867313        | 0.1053880        | 1307.7031       | 6739.4930       |                  |                |                |             |

| Information on Analysis                                                                                                                                                                                                                                 | Results          | 40(r)/39(k) ± 2σ             | Age ± 2σ<br>(Ma)                                      | M<br>sWD | 39Ar(k)<br>(%,n)    | K/Ca ± 2σ   |
|---------------------------------------------------------------------------------------------------------------------------------------------------------------------------------------------------------------------------------------------------------|------------------|------------------------------|-------------------------------------------------------|----------|---------------------|-------------|
| Project = SWENTON (20-01)<br>Sample = VS19-116<br>Material = Sanidine<br>Location = Rhyolite Dome<br>Region = Eastern Oregon<br>Analyst = Dan Miggins<br>Irradiation = 20-OSU-01 (1C47-20)<br>J = 0.00157680 ± 0.00000238<br>FCT-NM = 28.201 ± 0.023 Ma | Age Plateau      | 5.14141 ± 0.00290            | 14.78 ± 0.05                                          | 4.55     | 97.12               | 1.45 ± 0.52 |
|                                                                                                                                                                                                                                                         | Error Mean       | ± 0.06%                      | ± 0.31%                                               | 0%       | 27                  |             |
|                                                                                                                                                                                                                                                         |                  |                              | Full External Error ± 0.77                            | 1.55     | 2σ Confidence Limit |             |
|                                                                                                                                                                                                                                                         |                  |                              | Analytical Error ± 0.01                               | 2.1333   | Error Magnification |             |
|                                                                                                                                                                                                                                                         | Total Fusion Age | 5.15369 ± 0.00137<br>± 0.03% | 14.82 ± 0.04<br>± 0.30%                               |          | 28                  | 5.99 ± 0.09 |
|                                                                                                                                                                                                                                                         |                  |                              | Full External Error ± 0.77<br>Analytical Error ± 0.00 |          |                     |             |

| Normal Isochron |        |   | 39(k)/36(a) ± 2σ  | 40(a+r)/36(a) ± 2σ | r.i.   |
|-----------------|--------|---|-------------------|--------------------|--------|
| 20F23960        | 17.0 % | ✓ | 1857.42 ± 30.46   | 9849.79 ± 161.34   | 0.9986 |
| 20F23961        | 17.0 % | ✓ | 3081.46 ± 121.36  | 16147.75 ± 635.82  | 0.9997 |
| 20F23963        | 17.0 % | ✓ | 1383.48 ± 73.18   | 7395.92 ± 391.08   | 0.9995 |
| 20F23964        | 17.0 % | ✓ | 349.50 ± 10.49    | 2095.57 ± 62.70    | 0.9960 |
| 20F23966        | 17.0 % | ✓ | 2122.93 ± 49.02   | 11214.18 ± 258.74  | 0.9992 |
| 20F23967        | 17.0 % | ✓ | 3140.29 ± 92.40   | 16435.42 ± 483.42  | 0.9996 |
| 20F23969        | 17.0 % | ✓ | 3090.13 ± 81.01   | 16189.04 ± 424.19  | 0.9994 |
| 20F23970        | 17.0 % | ✓ | 1256.86 ± 30.02   | 6756.60 ± 161.23   | 0.9990 |
| 20F23972        | 17.0 % |   | 572.61 ± 8.76     | 3479.46 ± 53.11    | 0.9977 |
| 20F23973        | 17.0 % | ✓ | 8152.13 ± 1349.99 | 42070.56 ± 6966.73 | 1.0000 |
| 20F23975        | 17.0 % | ✓ | 609.90 ± 9.25     | 3448.50 ± 52.17    | 0.9975 |
| 20F23976        | 17.0 % | ✓ | 642.32 ± 19.05    | 3616.67 ± 107.14   | 0.9986 |
| 20F23978        | 17.0 % | ✓ | 1626.51 ± 76.29   | 8645.98 ± 405.43   | 0.9996 |
| 20F23979        | 17.0 % | ✓ | 780.16 ± 30.11    | 4331.40 ± 167.03   | 0.9989 |
| 20F23981        | 17.0 % | ✓ | 524.11 ± 18.96    | 2996.86 ± 108.24   | 0.9979 |
| 20F23982        | 17.0 % | ✓ | 1752.26 ± 37.45   | 9298.92 ± 198.56   | 0.9990 |
| 20F23984        | 17.0 % | ✓ | 2493.98 ± 82.42   | 13110.72 ± 433.13  | 0.9996 |
| 20F23985        | 17.0 % | ✓ | 3979.49 ± 160.88  | 20754.53 ± 838.84  | 0.9998 |
| 20F23987        | 17.0 % | ✓ | 1722.33 ± 33.25   | 9155.31 ± 176.53   | 0.9988 |
| 20F23988        | 17.0 % | ✓ | 2274.14 ± 58.35   | 11998.28 ± 307.66  | 0.9994 |
| 20F23990        | 17.0 % | ✓ | 6536.67 ± 667.79  | 33954.19 ± 3468.61 | 1.0000 |
| 20F23991        | 17.0 % | ✓ | 5598.73 ± 409.76  | 29065.31 ± 2127.09 | 0.9999 |
| 20F23993        | 17.0 % | ✓ | 1460.18 ± 32.60   | 7797.92 ± 173.98   | 0.9991 |
| 20F23994        | 17.0 % | ✓ | 1925.51 ± 50.38   | 10218.24 ± 267.22  | 0.9994 |
| 20F23996        | 17.0 % | ✓ | 5597.15 ± 340.32  | 29075.50 ± 1767.69 | 0.9999 |
| 20F23997        | 17.0 % | ✓ | 1751.34 ± 57.73   | 9272.56 ± 305.52   | 0.9994 |
| 20F23999        | 17.0 % | ✓ | 669.50 ± 18.30    | 3736.30 ± 102.02   | 0.9985 |
| 20F24000        | 17.0 % | ✓ | 7205.47 ± 645.93  | 37394.48 ± 3352.02 | 0.9999 |

| Results         | 40(a)/36(a) ± 2σ      | 40(r)/39(k) ± 2σ  | Age ± 2σ (Ma)              | MSWD            |
|-----------------|-----------------------|-------------------|----------------------------|-----------------|
| Normal Isochron | 305.88 ± 8.87         | 5.13762 ± 0.00499 | 14.77 ± 0.05               | 4.35            |
| Error Chron     | ± 2.90%               | ± 0.10%           | ± 0.32%                    | 0%              |
|                 |                       |                   | Full External Error ± 0.77 |                 |
|                 |                       |                   | Analytical Error ± 0.01    |                 |
| .....           |                       |                   |                            |                 |
| Statistics      | 2σ Confidence Limit   | 1.57              | Convergence                | 0.000000345385  |
|                 | Error Magnification   | 2.0846            | Number of Iterations       | 1               |
|                 | Number of Data Points | 27                | Calculated Line            | Weighted York-2 |

| Inverse Isochron |        |   | 39(k)/40(a+r) ± 2σ   | 36(a)/40(a+r) ± 2σ     | r.i.   |
|------------------|--------|---|----------------------|------------------------|--------|
| 20F23960         | 17.0 % | ✓ | 0.1885743 ±0.0001618 | 0.00010152 ±0.00000166 | 0.0011 |
| 20F23961         | 17.0 % | ✓ | 0.1908287 ±0.0001789 | 0.00006193 ±0.00000244 | 0.0013 |
| 20F23963         | 17.0 % | ✓ | 0.1870596 ±0.0003082 | 0.00013521 ±0.00000715 | 0.0042 |
| 20F23964         | 17.0 % | ✓ | 0.1667800 ±0.0004447 | 0.00047720 ±0.00001428 | 0.0121 |
| 20F23966         | 17.0 % | ✓ | 0.1893071 ±0.0001715 | 0.00008917 ±0.00000206 | 0.0014 |
| 20F23967         | 17.0 % | ✓ | 0.1910686 ±0.0001671 | 0.00006084 ±0.00000179 | 0.0010 |
| 20F23969         | 17.0 % | ✓ | 0.1908780 ±0.0001703 | 0.00006177 ±0.00000162 | 0.0012 |
| 20F23970         | 17.0 % | ✓ | 0.1860190 ±0.0001936 | 0.00014800 ±0.00000353 | 0.0033 |
| 20F23972         | 17.0 % |   | 0.1645683 ±0.0001707 | 0.00028740 ±0.00000439 | 0.0041 |
| 20F23973         | 17.0 % | ✓ | 0.1937727 ±0.0002296 | 0.00002377 ±0.00000394 | 0.0006 |
| 20F23975         | 17.0 % | ✓ | 0.1768591 ±0.0001878 | 0.00028998 ±0.00000439 | 0.0050 |
| 20F23976         | 17.0 % | ✓ | 0.1776008 ±0.0002746 | 0.00027650 ±0.00000819 | 0.0061 |
| 20F23978         | 17.0 % | ✓ | 0.1881234 ±0.0002427 | 0.00011566 ±0.00000542 | 0.0031 |
| 20F23979         | 17.0 % | ✓ | 0.1801165 ±0.0003246 | 0.00023087 ±0.00000890 | 0.0065 |
| 20F23981         | 17.0 % | ✓ | 0.1748880 ±0.0004050 | 0.00033368 ±0.00001205 | 0.0100 |
| 20F23982         | 17.0 % | ✓ | 0.1884374 ±0.0001784 | 0.00010754 ±0.00000230 | 0.0023 |
| 20F23984         | 17.0 % | ✓ | 0.1902245 ±0.0001788 | 0.00007627 ±0.00000252 | 0.0013 |
| 20F23985         | 17.0 % | ✓ | 0.1917406 ±0.0001726 | 0.00004818 ±0.00000195 | 0.0009 |
| 20F23987         | 17.0 % | ✓ | 0.1881240 ±0.0001745 | 0.00010923 ±0.00000211 | 0.0018 |
| 20F23988         | 17.0 % | ✓ | 0.1895386 ±0.0001736 | 0.00008335 ±0.00000214 | 0.0012 |
| 20F23990         | 17.0 % | ✓ | 0.1925143 ±0.0001954 | 0.00002945 ±0.00000301 | 0.0008 |
| 20F23991         | 17.0 % | ✓ | 0.1926257 ±0.0001908 | 0.00003441 ±0.00000252 | 0.0008 |
| 20F23993         | 17.0 % | ✓ | 0.1872518 ±0.0001808 | 0.00012824 ±0.00000286 | 0.0024 |
| 20F23994         | 17.0 % | ✓ | 0.1884385 ±0.0001771 | 0.00009786 ±0.00000256 | 0.0016 |
| 20F23996         | 17.0 % | ✓ | 0.1925039 ±0.0001829 | 0.00003439 ±0.00000209 | 0.0009 |
| 20F23997         | 17.0 % | ✓ | 0.1888738 ±0.0002082 | 0.00010785 ±0.00000355 | 0.0028 |
| 20F23999         | 17.0 % | ✓ | 0.1791874 ±0.0002646 | 0.00026764 ±0.00000731 | 0.0063 |
| 20F24000         | 17.0 % | ✓ | 0.1926879 ±0.0001874 | 0.00002674 ±0.00000240 | 0.0007 |

| Results          | 40(a)/36(a) ± 2σ      | 40(r)/39(k) ± 2σ | Age ± 2σ (Ma)             | M <sub>SWD</sub> |
|------------------|-----------------------|------------------|---------------------------|------------------|
| Inverse Isochron | 306.38 ±8.67          | 5.13783 ±0.00487 | 14.77 ±0.05               | 4.19             |
| Error Chron      | ±2.83%                | ±0.09%           | ±0.32%                    | 0%               |
|                  |                       |                  | Full External Error ±0.77 |                  |
|                  |                       |                  | Analytical Error ±0.01    |                  |
| .....            |                       |                  |                           |                  |
| Statistics       | 2σ Confidence Limit   | 1.57             | Convergence               | 0.0000234004     |
|                  | Error Magnification   | 2.0463           | Number of Iterations      | 3                |
|                  | Number of Data Points | 27               | Calculated Line           | Weighted York-2  |
|                  | Spreading Factor      | 13.9%            |                           |                  |

| Degassing Patterns |        | 36Ar(a) [fA] | %1σ       | 36Ar(c) [fA] | %1σ        | 36Ar(ca) [fA] | %1σ       | 36Ar(cl) [fA] | %1σ        | 37Ar(ca) [fA] | %1σ       | 38Ar(a) [fA] | %1σ       | 38Ar(c) [fA] | %1σ        | 38Ar(k) [fA] | %1σ       | 38Ar(ca) [fA] | %1σ        | 38Ar(cl) [fA] | %1σ        | 39Ar(k) [fA] | %1σ       | 39Ar(ca) [fA] | %1σ       | 40Ar(r) [fA] | %1σ       | 40Ar(a) [fA] | %1σ       | 40Ar(c) [fA] | %1σ        | 40Ar(k) [fA] | %1σ       |      |
|--------------------|--------|--------------|-----------|--------------|------------|---------------|-----------|---------------|------------|---------------|-----------|--------------|-----------|--------------|------------|--------------|-----------|---------------|------------|---------------|------------|--------------|-----------|---------------|-----------|--------------|-----------|--------------|-----------|--------------|------------|--------------|-----------|------|
| 20F23960           | 17.0 % | ✓            | 0.0554046 | 0.82         | 0.00000000 | 0.00          | 0.0010652 | 3.26          | 0.00000000 | 0.00          | 3.940927  | 3.26         | 0.0104438 | 0.83         | 0.00000000 | 0.00         | 1.242838  | 0.10          | 0.0007094  | 10.17         | 0.00000000 | 0.00         | 102.9095  | 0.04          | 0.0025320 | 3.38         | 529.1825  | 0.03         | 16.54161  | 0.83         | 0.00000000 | 0.00         | 0.0624661 | 9.65 |
| 20F23961           | 17.0 % | ✓            | 0.0174030 | 1.97         | 0.00000000 | 0.00          | 0.0006998 | 5.11          | 0.00000000 | 0.00          | 2.589120  | 5.11         | 0.0032805 | 1.98         | 0.00000000 | 0.00         | 0.647648  | 0.10          | 0.0004660  | 10.90         | 0.00000000 | 0.00         | 53.6265   | 0.05          | 0.0016635 | 5.19         | 275.8234  | 0.04         | 5.19584   | 1.97         | 0.00000000 | 0.00         | 0.0325513 | 9.65 |
| 20F23963           | 17.0 % | ✓            | 0.0114596 | 2.64         | 0.00000000 | 0.00          | 0.0007993 | 4.30          | 0.00000000 | 0.00          | 2.957115  | 4.29         | 0.0021601 | 2.65         | 0.00000000 | 0.00         | 0.191470  | 0.12          | 0.0005323  | 10.54         | 0.00000000 | 0.00         | 15.8541   | 0.08          | 0.0018999 | 4.39         | 81.3331   | 0.12         | 3.42139   | 2.65         | 0.00000000 | 0.00         | 0.0096235 | 9.65 |
| 20F23964           | 17.0 % | ✓            | 0.0224055 | 1.50         | 0.00000000 | 0.00          | 0.0003817 | 8.83          | 0.00000000 | 0.00          | 1.412280  | 8.83         | 0.0042234 | 1.50         | 0.00000000 | 0.00         | 0.094571  | 0.15          | 0.00005243 | 13.06         | 0.00000000 | 0.00         | 7.8307    | 0.12          | 0.0009074 | 4.87         | 40.2629   | 0.26         | 6.68939   | 1.50         | 0.00000000 | 0.00         | 0.0047532 | 9.65 |
| 20F23966           | 17.0 % | ✓            | 0.0350762 | 1.15         | 0.00000000 | 0.00          | 0.0009484 | 4.23          | 0.00000000 | 0.00          | 3.508731  | 4.23         | 0.0066119 | 1.16         | 0.00000000 | 0.00         | 0.899304  | 0.10          | 0.0006316  | 10.52         | 0.00000000 | 0.00         | 74.4642   | 0.04          | 0.0022544 | 4.33         | 382.8787  | 0.03         | 10.47235  | 1.16         | 0.00000000 | 0.00         | 0.0451998 | 9.65 |
| 20F23967           | 17.0 % | ✓            | 0.0273120 | 1.47         | 0.00000000 | 0.00          | 0.0022055 | 1.79          | 0.00000000 | 0.00          | 8.159497  | 1.78         | 0.0051483 | 1.48         | 0.00000000 | 0.00         | 1.035818  | 0.10          | 0.0014687  | 9.79          | 0.00000000 | 0.00         | 85.7678   | 0.04          | 0.0052425 | 2.01         | 440.7305  | 0.03         | 8.15428   | 1.47         | 0.00000000 | 0.00         | 0.0520610 | 9.65 |
| 20F23969           | 17.0 % | ✓            | 0.0307007 | 1.31         | 0.00000000 | 0.00          | 0.0011115 | 3.08          | 0.00000013 | 171.78        | 4.111927  | 3.08         | 0.0057871 | 1.32         | 0.00000000 | 0.00         | 1.145734  | 0.10          | 0.0007401  | 10.11         | 0.0056601  | 171.79       | 94.8691   | 0.04          | 0.0026419 | 3.21         | 487.8483  | 0.03         | 9.16599   | 1.31         | 0.00000000 | 0.00         | 0.0575856 | 9.65 |
| 20F23970           | 17.0 % | ✓            | 0.0300077 | 1.19         | 0.00000000 | 0.00          | 0.0014907 | 2.33          | 0.00000000 | #####         | 5.514927  | 2.33         | 0.0056564 | 1.20         | 0.00000000 | 0.00         | 0.455488  | 0.10          | 0.0009927  | 9.91          | 0.00001863 | #####        | 37.7153   | 0.05          | 0.0035433 | 2.50         | 193.7908  | 0.06         | 8.95909   | 1.20         | 0.00000000 | 0.00         | 0.0228932 | 9.65 |
| 20F23972           | 17.0 % | ✓            | 0.0657139 | 0.76         | 0.00000000 | 0.00          | 0.0016984 | 2.19          | 0.00000000 | 0.00          | 6.283266  | 2.19         | 0.0123871 | 0.78         | 0.00000000 | 0.00         | 0.454437  | 0.10          | 0.0011310  | 9.88          | 0.00000000 | 0.00         | 37.6283   | 0.05          | 0.0040370 | 2.37         | 209.0291  | 0.07         | 19.61953  | 0.77         | 0.00000000 | 0.00         | 0.0228404 | 9.65 |
| 20F23973           | 17.0 % | ✓            | 0.0033727 | 8.28         | 0.00000000 | 0.00          | 0.0014399 | 2.42          | 0.00000000 | 0.00          | 5.326926  | 2.41         | 0.006358  | 8.28         | 0.00000000 | 0.00         | 0.332052  | 0.11          | 0.0009588  | 9.93          | 0.00000000 | 0.00         | 27.4946   | 0.06          | 0.0034226 | 2.38         | 104.8840  | 0.06         | 1.00695   | 8.28         | 0.00000000 | 0.00         | 0.0166892 | 9.65 |
| 20F23975           | 17.0 % | ✓            | 0.0562495 | 0.76         | 0.00000000 | 0.00          | 0.0005752 | 6.24          | 0.00000077 | 309.10        | 2.128018  | 6.24         | 0.0106030 | 0.77         | 0.00000000 | 0.00         | 0.414320  | 0.10          | 0.0003830  | 11.47         | 0.0030581  | 309.10       | 34.3066   | 0.05          | 0.0013673 | 6.30         | 177.1828  | 0.07         | 16.79386  | 0.76         | 0.00000000 | 0.00         | 0.0208241 | 9.65 |
| 20F23976           | 17.0 % | ✓            | 0.0249656 | 1.48         | 0.00000000 | 0.00          | 0.0021076 | 1.83          | 0.00000006 | 371.54        | 7.797399  | 1.82         | 0.0047060 | 1.49         | 0.00000000 | 0.00         | 0.193667  | 0.12          | 0.0014035  | 9.80          | 0.0025738  | 371.54       | 16.0360   | 0.07          | 0.0050098 | 2.04         | 82.8386   | 0.14         | 7.45373   | 1.48         | 0.00000000 | 0.00         | 0.0097338 | 9.65 |
| 20F23978           | 17.0 % | ✓            | 0.0146983 | 2.34         | 0.00000000 | 0.00          | 0.0015075 | 2.47          | 0.00000000 | 0.00          | 5.577081  | 2.47         | 0.0027706 | 2.35         | 0.00000000 | 0.00         | 0.288724  | 0.11          | 0.0010039  | 9.94          | 0.00000000 | 0.00         | 23.9069   | 0.06          | 0.0035833 | 2.63         | 122.6928  | 0.09         | 4.38832   | 2.35         | 0.00000000 | 0.00         | 0.0145115 | 9.65 |
| 20F23979           | 17.0 % | ✓            | 0.0176152 | 1.93         | 0.00000000 | 0.00          | 0.0005189 | 6.75          | 0.00000000 | 0.00          | 1.919665  | 6.75         | 0.0033205 | 1.93         | 0.00000000 | 0.00         | 0.165970  | 0.12          | 0.0003455  | 11.76         | 0.00000000 | 0.00         | 13.7426   | 0.08          | 0.0012334 | 6.31         | 71.0393   | 0.15         | 5.25919   | 1.93         | 0.00000000 | 0.00         | 0.0083418 | 9.65 |
| 20F23981           | 17.0 % | ✓            | 0.0187427 | 1.81         | 0.00000000 | 0.00          | 0.0003238 | 11.60         | 0.00000077 | 278.50        | 1.198046  | 11.60        | 0.0035330 | 1.81         | 0.00000000 | 0.00         | 0.118636  | 0.14          | 0.0002156  | 15.08         | 0.0032700  | 278.50       | 9.8233    | 0.11          | 0.0007697 | 11.64        | 50.5734   | 0.21         | 5.59582   | 1.81         | 0.00000000 | 0.00         | 0.0059628 | 9.65 |
| 20F23982           | 17.0 % | ✓            | 0.0334883 | 1.07         | 0.00000000 | 0.00          | 0.0006254 | 5.28          | 0.00000000 | 0.00          | 2.313624  | 5.28         | 0.0063125 | 1.08         | 0.00000000 | 0.00         | 0.708682  | 0.10          | 0.0004165  | 10.98         | 0.00000000 | 0.00         | 58.6803   | 0.05          | 0.0014865 | 5.36         | 301.4065  | 0.04         | 9.99825   | 1.07         | 0.00000000 | 0.00         | 0.0356189 | 9.65 |
| 20F23984           | 17.0 % | ✓            | 0.0225450 | 1.65         | 0.00000000 | 0.00          | 0.0009369 | 3.76          | 0.00000000 | 0.00          | 3.466316  | 3.75         | 0.0042497 | 1.66         | 0.00000000 | 0.00         | 0.679052  | 0.10          | 0.0006239  | 10.34         | 0.00000000 | 0.00         | 56.2268   | 0.05          | 0.0022271 | 3.86         | 288.8505  | 0.04         | 6.73104   | 1.66         | 0.00000000 | 0.00         | 0.0341297 | 9.65 |
| 20F23985           | 17.0 % | ✓            | 0.0185120 | 2.02         | 0.00000000 | 0.00          | 0.0006871 | 5.11          | 0.00000000 | 0.00          | 2.541941  | 5.11         | 0.0034895 | 2.03         | 0.00000000 | 0.00         | 0.889690  | 0.10          | 0.0004575  | 10.90         | 0.00000000 | 0.00         | 73.6681   | 0.04          | 0.0016332 | 5.19         | 378.6803  | 0.03         | 5.52693   | 2.02         | 0.00000000 | 0.00         | 0.0447166 | 9.65 |
| 20F23987           | 17.0 % | ✓            | 0.0388870 | 0.96         | 0.00000000 | 0.00          | 0.0008470 | 4.32          | 0.00000031 | 71.48         | 3.133545  | 4.32         | 0.0073302 | 0.98         | 0.00000000 | 0.00         | 0.808874  | 0.10          | 0.0005640  | 10.55         | 0.0136308  | 71.49        | 66.9764   | 0.05          | 0.0020133 | 4.41         | 344.4127  | 0.03         | 11.61011  | 0.97         | 0.00000000 | 0.00         | 0.0406547 | 9.65 |
| 20F23988           | 17.0 % | ✓            | 0.0308486 | 1.28         | 0.00000000 | 0.00          | 0.0009582 | 4.06          | 0.00000022 | 96.67         | 3.544799  | 4.06         | 0.0058150 | 1.29         | 0.00000000 | 0.00         | 0.847249  | 0.10          | 0.0006381  | 10.45         | 0.0098276  | 96.67        | 70.1539   | 0.04          | 0.0022775 | 4.16         | 360.9197  | 0.03         | 9.21015   | 1.29         | 0.00000000 | 0.00         | 0.0425834 | 9.65 |
| 20F23990           | 17.0 % | ✓            | 0.0057133 | 5.11         | 0.00000000 | 0.00          | 0.0003732 | 9.61          | 0.00000000 | 0.00          | 1.380803  | 9.61         | 0.0010770 | 5.11         | 0.00000000 | 0.00         | 0.451030  | 0.10          | 0.0002485  | 13.60         | 0.00000000 | 0.00         | 37.3462   | 0.05          | 0.0008872 | 9.65         | 192.2860  | 0.05         | 1.70577   | 5.11         | 0.00000000 | 0.00         | 0.0226691 | 9.65 |
| 20F23991           | 17.0 % | ✓            | 0.0085281 | 3.66         | 0.00000000 | 0.00          | 0.0010052 | 3.49          | 0.00000000 | 0.00          | 3.719013  | 3.49         | 0.0016075 | 3.66         | 0.00000000 | 0.00         | 0.576632  | 0.10          | 0.0006694  | 10.24         | 0.00000000 | 0.00         | 47.7463   | 0.05          | 0.0023895 | 3.61         | 245.3248  | 0.04         | 2.54614   | 3.66         | 0.00000000 | 0.00         | 0.0289800 | 9.65 |
| 20F23993           | 17.0 % | ✓            | 0.0365437 | 1.12         | 0.00000000 | 0.00          | 0.0007276 | 4.94          | 0.00000007 | 336.62        | 2.691962  | 4.94         | 0.0068885 | 1.13         | 0.00000000 | 0.00         | 0.644432  | 0.10          | 0.0004846  | 10.82         | 0.0030011  | 336.62       | 53.3602   | 0.05          | 0.0017296 | 5.02         | 274.0546  | 0.05         | 10.91049  | 1.12         | 0.00000000 | 0.00         | 0.0323897 | 9.65 |
| 20F23994           | 17.0 % | ✓            | 0.0297164 | 1.31         | 0.00000000 | 0.00          | 0.0006951 | 5.24          | 0.00000004 | 53.81         | 2.571735  | 5.24         | 0.0056015 | 1.32         | 0.00000000 | 0.00         | 0.91038   | 0.10          | 0.0004629  | 10.96         | 0.0180598  | 53.82        | 57.2193   | 0.05          | 0.0016523 | 5.32         | 294.7776  | 0.04         | 8.87214   | 1.31         | 0.00000000 | 0.00         | 0.0347321 | 9.65 |
| 20F23996           | 17.0 % | ✓            | 0.0094745 | 3.04         | 0.00000000 | 0.00          | 0.0005306 | 6.32          | 0.00000029 | 70.53         | 1.962912  | 6.31         | 0.0017859 | 3.04         | 0.00000000 | 0.00         | 0.640448  | 0.10          | 0.0003533  | 11.52         | 0.0124971  | 70.53        | 53.0304   | 0.05          | 0.0012612 | 6.38         | 272.6481  | 0.03         | 2.82872   | 3.04         | 0.00000000 | 0.00         | 0.0321894 | 9.65 |
| 20F23997           | 17.0 % | ✓            | 0.0177136 | 1.65         | 0.00000000 | 0.00          | 0.0003057 | 10.81         | 0.00000008 | 245.47        | 1.130865  | 10.80        | 0.0033990 | 1.66         | 0.00000000 | 0.00         | 0.374661  | 0.10          | 0.0002036  | 14.47         | 0.0035704  | 245.48       | 31.0226   | 0.05          | 0.0007266 | 10.84        | 158.9621  | 0.06         | 5.28858   | 1.65         | 0.00000000 | 0.00         | 0.0188307 | 9.65 |
| 20F23999           | 17.0 % | ✓            | 0.0260885 | 1.37         | 0.00000000 | 0.00          | 0.0001629 | 20.94         | 0.00000026 | 72.65         | 0.602618  | 20.94        | 0.0049177 | 1.37         | 0.00000000 | 0.00         | 0.210939  | 0.11          | 0.0001885  | 23.05         | 0.0112930  | 72.66        | 17.4662   | 0.07          | 0.0003872 | 20.96        | 89.6856   | 0.12         | 7.28899   | 1.37         | 0.00000000 | 0.00         | 0.0106020 | 9.65 |
| 20F24000           | 17.0 % | ✓            | 0.0067769 | 4.48         | 0.00000000 | 0.00          | 0.0006439 | 5.54          | 0.00000043 | 48.12         | 2.382256  | 5.54         | 0.0012774 | 4.48         | 0.00000000 | 0.00         | 0.589726  | 0.10          | 0.0004288  | 11.11         | 0.0187600  | 48.13        | 48.8305   | 0.05          | 0.0015306 | 5.61         | 251.3944  | 0.04         | 2.02330   | 4.48         | 0.00000000 | 0.00         | 0.0296401 | 9.65 |
| Σ                  |        |              | 0.7159632 | 0.27         | 0.00000000 | 0.00          | 0.0253723 | 0.75          | 0.0000241  | 31.77         | 93.867313 | 0.75         | 0.1349591 | 0.27         | 0.00000000 | 0.00         | 15.793130 | 0.22          | 0.0168961  | 2.22          | 0.1053880  | 31.78        | 1307.7031 | 0.01          | 0.0603097 | 0.77         | 6739.4930 | 0.01         | 213.75797 | 0.27         | 0.00000000 | 0.00         | 0.7937758 | 2.08 |
| Σ                  |        |              |           |              |            |               |           | 0.7413597     | 0.26       | 93.867313     | 0.75      |              |           |              |            |              |           |               |            |               | 16.050373  | 0.21         |           | 1307.7634     | 0.01      |              |           |              |           |              |            | 6954.0448    | 0.01      |      |

| Additional Parameters |        |   | 40Ar/39Ar | 1σ       | 37Ar/39Ar | 1σ       | 36Ar/39Ar | 1σ       | Time (days) | 37Ar (decay) | 39Ar (decay) | 40Ar (moles) |
|-----------------------|--------|---|-----------|----------|-----------|----------|-----------|----------|-------------|--------------|--------------|--------------|
| 20F23960              | 17.0 % | ✓ | 5.303426  | 0.002275 | 0.038294  | 0.001247 | 0.000549  | 0.000004 | 140.744     | 16.158376    | 1.00099446   | 1.932E-11    |
| 20F23961              | 17.0 % | ✓ | 5.240746  | 0.002455 | 0.048279  | 0.002466 | 0.000338  | 0.000006 | 140.749     | 16.160149    | 1.00099450   | 9.949E-12    |
| 20F23963              | 17.0 % | ✓ | 5.345856  | 0.004403 | 0.186498  | 0.008008 | 0.000773  | 0.000019 | 140.761     | 16.163918    | 1.00099459   | 3.001E-12    |
| 20F23964              | 17.0 % | ✓ | 5.995835  | 0.007992 | 0.180331  | 0.015919 | 0.002910  | 0.000043 | 140.767     | 16.165913    | 1.00099463   | 1.662E-12    |
| 20F23966              | 17.0 % | ✓ | 5.282868  | 0.002392 | 0.047118  | 0.001993 | 0.000484  | 0.000005 | 140.779     | 16.169683    | 1.00099471   | 1.393E-11    |
| 20F23967              | 17.0 % | ✓ | 5.234009  | 0.002288 | 0.095129  | 0.001698 | 0.000344  | 0.000005 | 140.785     | 16.171680    | 1.00099476   | 1.589E-11    |
| 20F23969              | 17.0 % | ✓ | 5.239409  | 0.002336 | 0.043342  | 0.001335 | 0.000335  | 0.000004 | 140.797     | 16.175451    | 1.00099484   | 1.760E-11    |
| 20F23970              | 17.0 % | ✓ | 5.375897  | 0.002797 | 0.146211  | 0.003401 | 0.000835  | 0.000009 | 140.803     | 16.177226    | 1.00099488   | 7.178E-12    |
| 20F23972              | 17.0 % |   | 6.076459  | 0.003150 | 0.166964  | 0.003654 | 0.001791  | 0.000013 | 140.815     | 16.180999    | 1.00099496   | 8.095E-12    |
| 20F23973              | 17.0 % | ✓ | 5.160649  | 0.003056 | 0.193720  | 0.004675 | 0.000175  | 0.000010 | 140.821     | 16.182996    | 1.00099501   | 5.024E-12    |
| 20F23975              | 17.0 % | ✓ | 5.654599  | 0.003001 | 0.062027  | 0.003868 | 0.001656  | 0.000012 | 140.833     | 16.186770    | 1.00099509   | 6.868E-12    |
| 20F23976              | 17.0 % | ✓ | 5.629455  | 0.004351 | 0.486092  | 0.008861 | 0.001688  | 0.000023 | 140.839     | 16.188769    | 1.00099514   | 3.197E-12    |
| 20F23978              | 17.0 % | ✓ | 5.315471  | 0.003428 | 0.233248  | 0.005752 | 0.000678  | 0.000014 | 140.851     | 16.192544    | 1.00099522   | 4.499E-12    |
| 20F23979              | 17.0 % | ✓ | 5.552072  | 0.005002 | 0.139675  | 0.009429 | 0.001319  | 0.000025 | 140.857     | 16.194543    | 1.00099526   | 2.701E-12    |
| 20F23981              | 17.0 % | ✓ | 5.718103  | 0.006619 | 0.121950  | 0.014146 | 0.001941  | 0.000034 | 140.869     | 16.198320    | 1.00099535   | 1.989E-12    |
| 20F23982              | 17.0 % | ✓ | 5.307276  | 0.002511 | 0.039427  | 0.002082 | 0.000581  | 0.000006 | 140.874     | 16.200098    | 1.00099539   | 1.102E-11    |
| 20F23984              | 17.0 % | ✓ | 5.257346  | 0.002470 | 0.061646  | 0.002314 | 0.000418  | 0.000007 | 140.886     | 16.203876    | 1.00099547   | 1.046E-11    |
| 20F23985              | 17.0 % | ✓ | 5.215871  | 0.002347 | 0.034505  | 0.001763 | 0.000261  | 0.000005 | 140.892     | 16.205876    | 1.00099551   | 1.360E-11    |
| 20F23987              | 17.0 % | ✓ | 5.316090  | 0.002465 | 0.046784  | 0.002019 | 0.000593  | 0.000006 | 140.904     | 16.209656    | 1.00099560   | 1.260E-11    |
| 20F23988              | 17.0 % | ✓ | 5.276406  | 0.002415 | 0.050527  | 0.002050 | 0.000453  | 0.000006 | 140.910     | 16.211657    | 1.00099564   | 1.310E-11    |
| 20F23990              | 17.0 % | ✓ | 5.194902  | 0.002636 | 0.036972  | 0.003553 | 0.000163  | 0.000008 | 140.922     | 16.215437    | 1.00099572   | 6.868E-12    |
| 20F23991              | 17.0 % | ✓ | 5.191762  | 0.002570 | 0.077887  | 0.002715 | 0.000200  | 0.000006 | 140.928     | 16.217439    | 1.00099577   | 8.776E-12    |
| 20F23993              | 17.0 % | ✓ | 5.340835  | 0.002578 | 0.050447  | 0.002492 | 0.000698  | 0.000008 | 140.940     | 16.221221    | 1.00099585   | 1.009E-11    |
| 20F23994              | 17.0 % | ✓ | 5.307224  | 0.002493 | 0.044944  | 0.002353 | 0.000532  | 0.000007 | 140.946     | 16.223002    | 1.00099589   | 1.075E-11    |
| 20F23996              | 17.0 % | ✓ | 5.195184  | 0.002467 | 0.037014  | 0.002337 | 0.000189  | 0.000005 | 140.958     | 16.226785    | 1.00099597   | 9.753E-12    |
| 20F23997              | 17.0 % | ✓ | 5.295023  | 0.002918 | 0.036452  | 0.003938 | 0.000581  | 0.000009 | 140.964     | 16.228788    | 1.00099602   | 5.815E-12    |
| 20F23999              | 17.0 % | ✓ | 5.581232  | 0.004120 | 0.034501  | 0.007224 | 0.001503  | 0.000020 | 140.976     | 16.232573    | 1.00099610   | 3.451E-12    |
| 20F24000              | 17.0 % | ✓ | 5.190183  | 0.002523 | 0.048785  | 0.002702 | 0.000152  | 0.000006 | 140.982     | 16.234577    | 1.00099615   | 8.972E-12    |

| Procedure<br>Blanks |        | 36Ar ± 1σ (SE)<br>[fA] | 37Ar ± 1σ (SE)<br>[fA] | 38Ar ± 1σ (SE)<br>[fA] | 39Ar ± 1σ (SE)<br>[fA] | 40Ar ± 1σ (SE)<br>[fA] |
|---------------------|--------|------------------------|------------------------|------------------------|------------------------|------------------------|
| 20F23960            | 17.0 % | 0.0071097 ±0.0001570   | 0.0117407 ±0.0055518   | 0.0015100 ±0.0067853   | 0.0246467 ±0.0061481   | 1.7450609 ±0.0151006   |
| 20F23961            | 17.0 % | 0.0071097 ±0.0001570   | 0.0117407 ±0.0055518   | 0.0015100 ±0.0067853   | 0.0246467 ±0.0061481   | 1.7450609 ±0.0151006   |
| 20F23963            | 17.0 % | 0.0074530 ±0.0001856   | 0.0112002 ±0.0055091   | 0.0011416 ±0.0066555   | 0.0172414 ±0.0063042   | 1.9734134 ±0.0150890   |
| 20F23964            | 17.0 % | 0.0074530 ±0.0001856   | 0.0112002 ±0.0055091   | 0.0011416 ±0.0066555   | 0.0172414 ±0.0063042   | 1.9734134 ±0.0150890   |
| 20F23966            | 17.0 % | 0.0073014 ±0.0001648   | 0.0087043 ±0.0066552   | 0.0045039 ±0.0061885   | 0.0067557 ±0.0061159   | 1.9326962 ±0.0160760   |
| 20F23967            | 17.0 % | 0.0073014 ±0.0001648   | 0.0087043 ±0.0066552   | 0.0045039 ±0.0061885   | 0.0067557 ±0.0061159   | 1.9326962 ±0.0160760   |
| 20F23969            | 17.0 % | 0.0072379 ±0.0001650   | 0.0197641 ±0.0054731   | 0.0093332 ±0.0062746   | 0.0099131 ±0.0064957   | 1.9146434 ±0.0155588   |
| 20F23970            | 17.0 % | 0.0072379 ±0.0001650   | 0.0197641 ±0.0054731   | 0.0093332 ±0.0062746   | 0.0099131 ±0.0064957   | 1.9146434 ±0.0155588   |
| 20F23972            | 17.0 % | 0.0074158 ±0.0001815   | 0.0144355 ±0.0054717   | 0.0033690 ±0.0067965   | 0.0155658 ±0.0053840   | 1.9546178 ±0.0141321   |
| 20F23973            | 17.0 % | 0.0074158 ±0.0001815   | 0.0144355 ±0.0054717   | 0.0033690 ±0.0067965   | 0.0155658 ±0.0053840   | 1.9546178 ±0.0141321   |
| 20F23975            | 17.0 % | 0.0093798 ±0.0001980   | 0.0182055 ±0.0060462   | 0.0078119 ±0.0067136   | 0.0266434 ±0.0059231   | 2.4131093 ±0.0134838   |
| 20F23976            | 17.0 % | 0.0093798 ±0.0001980   | 0.0182055 ±0.0060462   | 0.0078119 ±0.0067136   | 0.0266434 ±0.0059231   | 2.4131093 ±0.0134838   |
| 20F23978            | 17.0 % | 0.0078038 ±0.0001930   | 0.0134445 ±0.0059628   | 0.0059576 ±0.0064240   | 0.0202121 ±0.0059175   | 1.9691656 ±0.0156148   |
| 20F23979            | 17.0 % | 0.0078038 ±0.0001930   | 0.0134445 ±0.0059628   | 0.0059576 ±0.0064240   | 0.0202121 ±0.0059175   | 1.9691656 ±0.0156148   |
| 20F23981            | 17.0 % | 0.0078172 ±0.0001648   | 0.0094250 ±0.0055317   | 0.0065479 ±0.0063318   | 0.0044926 ±0.0067816   | 2.0275945 ±0.0159283   |
| 20F23982            | 17.0 % | 0.0078172 ±0.0001648   | 0.0094250 ±0.0055317   | 0.0065479 ±0.0063318   | 0.0044926 ±0.0067816   | 2.0275945 ±0.0159283   |
| 20F23984            | 17.0 % | 0.0090647 ±0.0002044   | 0.0128511 ±0.0057994   | 0.0058775 ±0.0054205   | 0.0124329 ±0.0062607   | 2.4387636 ±0.0144216   |
| 20F23985            | 17.0 % | 0.0090647 ±0.0002044   | 0.0128511 ±0.0057994   | 0.0058775 ±0.0054205   | 0.0124329 ±0.0062607   | 2.4387636 ±0.0144216   |
| 20F23987            | 17.0 % | 0.0080958 ±0.0001943   | 0.0123074 ±0.0063599   | 0.0104671 ±0.0064176   | 0.0224966 ±0.0065931   | 1.9464685 ±0.0152888   |
| 20F23988            | 17.0 % | 0.0080958 ±0.0001943   | 0.0123074 ±0.0063599   | 0.0104671 ±0.0064176   | 0.0224966 ±0.0065931   | 1.9464685 ±0.0152888   |
| 20F23990            | 17.0 % | 0.0075745 ±0.0001826   | 0.0221178 ±0.0053336   | 0.0026041 ±0.0064322   | 0.0187951 ±0.0062570   | 1.9312263 ±0.0161392   |
| 20F23991            | 17.0 % | 0.0075745 ±0.0001826   | 0.0221178 ±0.0053336   | 0.0026041 ±0.0064322   | 0.0187951 ±0.0062570   | 1.9312263 ±0.0161392   |
| 20F23993            | 17.0 % | 0.0079588 ±0.0001825   | 0.0253152 ±0.0059623   | 0.0127556 ±0.0071486   | 0.0116612 ±0.0064328   | 2.0292830 ±0.0146528   |
| 20F23994            | 17.0 % | 0.0079588 ±0.0001825   | 0.0253152 ±0.0059623   | 0.0127556 ±0.0071486   | 0.0116612 ±0.0064328   | 2.0292830 ±0.0146528   |
| 20F23996            | 17.0 % | 0.0072947 ±0.0001644   | 0.0219731 ±0.0054335   | 0.0185371 ±0.0055677   | 0.0131501 ±0.0057760   | 1.9940168 ±0.0151744   |
| 20F23997            | 17.0 % | 0.0072947 ±0.0001644   | 0.0219731 ±0.0054335   | 0.0185371 ±0.0055677   | 0.0131501 ±0.0057760   | 1.9940168 ±0.0151744   |
| 20F23999            | 17.0 % | 0.0072947 ±0.0001644   | 0.0219731 ±0.0054335   | 0.0185371 ±0.0055677   | 0.0131501 ±0.0057760   | 1.9940168 ±0.0151744   |
| 20F24000            | 17.0 % | 0.0072947 ±0.0001644   | 0.0219731 ±0.0054335   | 0.0185371 ±0.0055677   | 0.0131501 ±0.0057760   | 1.9940168 ±0.0151744   |



| OSU Argon Geochronology Lab<br>CEOAS Oregon State University, Corvallis, USA |        |                      |        |                     |                      |        |                     |                      |        |                     |                      |        |                     |                     |        |                     |  |
|------------------------------------------------------------------------------|--------|----------------------|--------|---------------------|----------------------|--------|---------------------|----------------------|--------|---------------------|----------------------|--------|---------------------|---------------------|--------|---------------------|--|
| Intercept Values                                                             |        | 36Ar ± 1σ (SE) [fA]  | r2     | Regression (type,n) | 37Ar ± 1σ (SE) [fA]  | r2     | Regression (type,n) | 38Ar ± 1σ (SE) [fA]  | r2     | Regression (type,n) | 39Ar ± 1σ (SE) [fA]  | r2     | Regression (type,n) | 40Ar ± 1σ (SE) [fA] | r2     | Regression (type,n) |  |
| 20F23960                                                                     | 17.0 % | 0.0625286 ±0.0004056 | 0.6364 | EXP 150 of 150      | 0.2322646 ±0.0055893 | 0.2033 | EXP 150 of 150      | 1.2452606 ±0.0070396 | 0.7643 | EXP 150 of 150      | 102.850144 ±0.012355 | 0.9999 | EXP 150 of 150      | 547.53161 ±0.03036  | 1.0000 | EXP 150 of 150      |  |
| 20F23961                                                                     | 17.0 % | 0.0248756 ±0.0002938 | 0.8595 | EXP 150 of 150      | 0.1485490 ±0.0059810 | 0.0461 | EXP 149 of 150      | 0.6394032 ±0.0059527 | 0.5599 | EXP 150 of 150      | 53.607742 ±0.009644  | 0.9997 | EXP 149 of 150      | 282.79687 ±0.02654  | 0.9999 | EXP 149 of 150      |  |
| 20F23963                                                                     | 17.0 % | 0.0194837 ±0.0002290 | 0.8537 | EXP 148 of 150      | 0.1718289 ±0.0055506 | 0.1434 | EXP 150 of 150      | 0.1943520 ±0.0065453 | 0.1016 | EXP 150 of 150      | 15.859935 ±0.008182  | 0.9974 | EXP 150 of 150      | 86.73749 ±0.02065   | 0.9984 | EXP 150 of 150      |  |
| 20F23964                                                                     | 17.0 % | 0.0298161 ±0.0002669 | 0.6252 | EXP 150 of 150      | 0.0762014 ±0.0053883 | 0.0124 | EXP 148 of 150      | 0.0970756 ±0.0063089 | 0.0468 | EXP 150 of 150      | 7.842259 ±0.006656   | 0.9924 | EXP 149 of 150      | 48.93044 ±0.01749   | 0.9871 | EXP 149 of 150      |  |
| 20F23966                                                                     | 17.0 % | 0.0426555 ±0.0003546 | 0.7529 | EXP 150 of 150      | 0.2083894 ±0.0062633 | 0.0801 | EXP 150 of 150      | 0.9018270 ±0.0061030 | 0.7025 | EXP 149 of 150      | 74.410519 ±0.012635  | 0.9997 | EXP 147 of 150      | 395.32899 ±0.02931  | 0.9999 | EXP 150 of 150      |  |
| 20F23967                                                                     | 17.0 % | 0.0362695 ±0.0003529 | 0.8355 | EXP 148 of 150      | 0.4960812 ±0.0056957 | 0.4364 | EXP 150 of 150      | 1.0253852 ±0.0065248 | 0.7058 | EXP 150 of 150      | 85.707604 ±0.011336  | 0.9998 | EXP 150 of 150      | 450.86952 ±0.03211  | 0.9999 | EXP 150 of 150      |  |
| 20F23969                                                                     | 17.0 % | 0.0384592 ±0.0003534 | 0.8444 | EXP 150 of 150      | 0.2345600 ±0.0054987 | 0.1887 | EXP 150 of 150      | 1.1489420 ±0.0068044 | 0.7461 | EXP 149 of 150      | 94.801828 ±0.015007  | 0.9998 | EXP 150 of 150      | 498.98656 ±0.03830  | 0.9999 | EXP 150 of 150      |  |
| 20F23970                                                                     | 17.0 % | 0.0381500 ±0.0003043 | 0.7399 | EXP 150 of 150      | 0.3212986 ±0.0055626 | 0.2849 | EXP 150 of 150      | 0.4531314 ±0.0061247 | 0.3528 | EXP 149 of 150      | 37.697034 ±0.009131  | 0.9995 | EXP 148 of 150      | 204.68739 ±0.02426  | 0.9998 | EXP 149 of 150      |  |
| 20F23972                                                                     | 17.0 % | 0.0735734 ±0.0004433 | 0.0567 | EXP 150 of 150      | 0.3740535 ±0.0062998 | 0.2987 | EXP 150 of 150      | 0.4693609 ±0.0061754 | 0.3890 | EXP 150 of 150      | 37.616244 ±0.009954  | 0.9993 | EXP 150 of 150      | 230.62609 ±0.02524  | 0.9998 | EXP 150 of 150      |  |
| 20F23973                                                                     | 17.0 % | 0.0121388 ±0.0002024 | 0.9189 | EXP 149 of 150      | 0.3148832 ±0.0055944 | 0.2521 | EXP 148 of 150      | 0.3323592 ±0.0067410 | 0.1615 | EXP 150 of 150      | 27.490437 ±0.009490  | 0.9989 | EXP 149 of 150      | 143.86224 ±0.02054  | 0.9996 | EXP 149 of 150      |  |
| 20F23975                                                                     | 17.0 % | 0.0651476 ±0.0003546 | 0.1601 | EXP 147 of 150      | 0.1133211 ±0.0055154 | 0.0178 | EXP 150 of 150      | 0.4206833 ±0.0065660 | 0.3306 | EXP 150 of 150      | 34.305684 ±0.009046  | 0.9994 | EXP 150 of 150      | 196.41064 ±0.02393  | 0.9998 | EXP 150 of 150      |  |
| 20F23976                                                                     | 17.0 % | 0.0359497 ±0.0002986 | 0.6255 | EXP 150 of 150      | 0.4636697 ±0.0060377 | 0.4268 | EXP 149 of 150      | 0.1945999 ±0.0067909 | 0.0955 | EXP 150 of 150      | 16.054143 ±0.007665  | 0.9977 | EXP 150 of 150      | 92.71522 ±0.01968   | 0.9987 | EXP 150 of 150      |  |
| 20F23978                                                                     | 17.0 % | 0.0237080 ±0.0002741 | 0.8256 | EXP 149 of 150      | 0.3311358 ±0.0058783 | 0.2624 | EXP 149 of 150      | 0.2795122 ±0.0065513 | 0.1231 | EXP 150 of 150      | 23.910595 ±0.009122  | 0.9986 | EXP 150 of 150      | 129.06480 ±0.02253  | 0.9994 | EXP 150 of 150      |  |
| 20F23979                                                                     | 17.0 % | 0.0256004 ±0.0002680 | 0.7839 | EXP 150 of 150      | 0.1051475 ±0.0053181 | 0.0313 | EXP 148 of 150      | 0.1516980 ±0.0058378 | 0.0331 | EXP 148 of 150      | 13.752487 ±0.008131  | 0.9965 | EXP 150 of 150      | 78.27600 ±0.02040   | 0.9977 | EXP 150 of 150      |  |
| 20F23981                                                                     | 17.0 % | 0.0265296 ±0.0002843 | 0.6498 | EXP 149 of 150      | 0.0645699 ±0.0065552 | 0.0000 | EXP 150 of 150      | 0.1191455 ±0.0065398 | 0.0298 | EXP 150 of 150      | 9.820319 ±0.006888   | 0.9950 | EXP 150 of 150      | 58.20281 ±0.02009   | 0.9936 | EXP 150 of 150      |  |
| 20F23982                                                                     | 17.0 % | 0.0412960 ±0.0003033 | 0.7628 | EXP 149 of 150      | 0.1334557 ±0.0050979 | 0.0739 | EXP 149 of 150      | 0.6998167 ±0.0069904 | 0.5038 | EXP 150 of 150      | 58.636842 ±0.011239  | 0.9997 | EXP 148 of 150      | 313.46792 ±0.02962  | 0.9999 | EXP 150 of 150      |  |
| 20F23984                                                                     | 17.0 % | 0.0321097 ±0.0002987 | 0.8155 | EXP 150 of 150      | 0.2011657 ±0.0054848 | 0.1481 | EXP 150 of 150      | 0.6696847 ±0.0062615 | 0.5512 | EXP 150 of 150      | 56.194142 ±0.010706  | 0.9997 | EXP 148 of 150      | 298.05445 ±0.02552  | 0.9999 | EXP 150 of 150      |  |
| 20F23985                                                                     | 17.0 % | 0.0279065 ±0.0003015 | 0.8790 | EXP 150 of 150      | 0.1440736 ±0.0054990 | 0.0611 | EXP 150 of 150      | 0.8835953 ±0.0065196 | 0.6478 | EXP 150 of 150      | 73.620140 ±0.011679  | 0.9998 | EXP 149 of 150      | 386.69069 ±0.03086  | 0.9999 | EXP 150 of 150      |  |
| 20F23987                                                                     | 17.0 % | 0.0470934 ±0.0003039 | 0.7708 | EXP 149 of 150      | 0.1810945 ±0.0053442 | 0.1120 | EXP 150 of 150      | 0.8201859 ±0.0070184 | 0.5978 | EXP 150 of 150      | 66.944524 ±0.012594  | 0.9997 | EXP 150 of 150      | 358.00992 ±0.02731  | 0.9999 | EXP 150 of 150      |  |
| 20F23988                                                                     | 17.0 % | 0.0393128 ±0.0003300 | 0.8230 | EXP 149 of 150      | 0.2064500 ±0.0061251 | 0.1475 | EXP 150 of 150      | 0.8533257 ±0.0066470 | 0.6287 | EXP 150 of 150      | 70.119567 ±0.012436  | 0.9997 | EXP 150 of 150      | 372.11890 ±0.02701  | 0.9999 | EXP 150 of 150      |  |
| 20F23990                                                                     | 17.0 % | 0.0135478 ±0.0002176 | 0.9163 | EXP 150 of 150      | 0.0630747 ±0.0061996 | 0.0277 | EXP 150 of 150      | 0.4398061 ±0.0061188 | 0.3477 | EXP 149 of 150      | 37.334425 ±0.007984  | 0.9996 | EXP 148 of 150      | 195.94571 ±0.02334  | 0.9998 | EXP 148 of 150      |  |
| 20F23991                                                                     | 17.0 % | 0.0169304 ±0.0002430 | 0.9086 | EXP 150 of 150      | 0.2073089 ±0.0058823 | 0.1430 | EXP 150 of 150      | 0.5686966 ±0.0065443 | 0.3670 | EXP 150 of 150      | 47.727275 ±0.010907  | 0.9995 | EXP 150 of 150      | 249.83115 ±0.02381  | 0.9999 | EXP 150 of 150      |  |
| 20F23993                                                                     | 17.0 % | 0.0445372 ±0.0003493 | 0.6644 | EXP 146 of 150      | 0.1407138 ±0.0055888 | 0.0503 | EXP 150 of 150      | 0.6422501 ±0.0069394 | 0.4792 | EXP 149 of 150      | 53.328666 ±0.011140  | 0.9996 | EXP 150 of 150      | 287.02676 ±0.02851  | 0.9999 | EXP 150 of 150      |  |
| 20F23994                                                                     | 17.0 % | 0.0378084 ±0.0003294 | 0.7516 | EXP 150 of 150      | 0.1332813 ±0.0057419 | 0.0549 | EXP 150 of 150      | 0.7026246 ±0.0063278 | 0.5995 | EXP 150 of 150      | 57.184405 ±0.010907  | 0.9997 | EXP 150 of 150      | 305.71372 ±0.02567  | 0.9999 | EXP 149 of 150      |  |
| 20F23996                                                                     | 17.0 % | 0.0171164 ±0.0002270 | 0.9312 | EXP 150 of 150      | 0.0990496 ±0.0053489 | 0.0196 | EXP 150 of 150      | 0.6367470 ±0.0066241 | 0.5179 | EXP 148 of 150      | 53.000079 ±0.010465  | 0.9996 | EXP 149 of 150      | 277.50302 ±0.02666  | 0.9999 | EXP 150 of 150      |  |
| 20F23997                                                                     | 17.0 % | 0.0249795 ±0.0002305 | 0.8860 | EXP 148 of 150      | 0.0477414 ±0.0052077 | 0.0306 | EXP 150 of 150      | 0.3633530 ±0.0066992 | 0.2431 | EXP 150 of 150      | 31.010378 ±0.008830  | 0.9992 | EXP 150 of 150      | 166.26350 ±0.02151  | 0.9997 | EXP 149 of 150      |  |
| 20F23999                                                                     | 17.0 % | 0.0330601 ±0.0003038 | 0.6136 | EXP 149 of 150      | 0.0151679 ±0.0055619 | 0.0002 | EXP 150 of 150      | 0.2087910 ±0.0059997 | 0.1449 | EXP 150 of 150      | 17.465030 ±0.007998  | 0.9979 | EXP 150 of 150      | 99.47917 ±0.01926   | 0.9991 | EXP 148 of 150      |  |
| 20F24000                                                                     | 17.0 % | 0.0145816 ±0.0002459 | 0.9048 | EXP 150 of 150      | 0.1248336 ±0.0060170 | 0.0326 | EXP 150 of 150      | 0.5918418 ±0.0069346 | 0.4738 | EXP 149 of 150      | 48.804049 ±0.010260  | 0.9996 | EXP 149 of 150      | 255.44132 ±0.02816  | 0.9998 | EXP 150 of 150      |  |

| Project Info |        | Analyst     | Irradiation | X-pos | Y-pos | Z/H-pos | Project                | Experiment | Nmb |
|--------------|--------|-------------|-------------|-------|-------|---------|------------------------|------------|-----|
| 20F23960     | 17.0 % | Dan Miggins | 20-OSU-01   | 0.00  | 0.00  | 57.21   | Oregon\Swenton (20-01) | 20F23956   | 01  |
| 20F23961     | 17.0 % | Dan Miggins | 20-OSU-01   | 0.00  | 0.00  | 57.21   | Oregon\Swenton (20-01) | 20F23956   | 01  |
| 20F23963     | 17.0 % | Dan Miggins | 20-OSU-01   | 0.00  | 0.00  | 57.21   | Oregon\Swenton (20-01) | 20F23956   | 01  |
| 20F23964     | 17.0 % | Dan Miggins | 20-OSU-01   | 0.00  | 0.00  | 57.21   | Oregon\Swenton (20-01) | 20F23956   | 01  |
| 20F23966     | 17.0 % | Dan Miggins | 20-OSU-01   | 0.00  | 0.00  | 57.21   | Oregon\Swenton (20-01) | 20F23956   | 01  |
| 20F23967     | 17.0 % | Dan Miggins | 20-OSU-01   | 0.00  | 0.00  | 57.21   | Oregon\Swenton (20-01) | 20F23956   | 01  |
| 20F23969     | 17.0 % | Dan Miggins | 20-OSU-01   | 0.00  | 0.00  | 57.21   | Oregon\Swenton (20-01) | 20F23956   | 01  |
| 20F23970     | 17.0 % | Dan Miggins | 20-OSU-01   | 0.00  | 0.00  | 57.21   | Oregon\Swenton (20-01) | 20F23956   | 01  |
| 20F23972     | 17.0 % | Dan Miggins | 20-OSU-01   | 0.00  | 0.00  | 57.21   | Oregon\Swenton (20-01) | 20F23956   | 01  |
| 20F23973     | 17.0 % | Dan Miggins | 20-OSU-01   | 0.00  | 0.00  | 57.21   | Oregon\Swenton (20-01) | 20F23956   | 01  |
| 20F23975     | 17.0 % | Dan Miggins | 20-OSU-01   | 0.00  | 0.00  | 57.21   | Oregon\Swenton (20-01) | 20F23956   | 01  |
| 20F23976     | 17.0 % | Dan Miggins | 20-OSU-01   | 0.00  | 0.00  | 57.21   | Oregon\Swenton (20-01) | 20F23956   | 01  |
| 20F23978     | 17.0 % | Dan Miggins | 20-OSU-01   | 0.00  | 0.00  | 57.21   | Oregon\Swenton (20-01) | 20F23956   | 01  |
| 20F23979     | 17.0 % | Dan Miggins | 20-OSU-01   | 0.00  | 0.00  | 57.21   | Oregon\Swenton (20-01) | 20F23956   | 01  |
| 20F23981     | 17.0 % | Dan Miggins | 20-OSU-01   | 0.00  | 0.00  | 57.21   | Oregon\Swenton (20-01) | 20F23956   | 01  |
| 20F23982     | 17.0 % | Dan Miggins | 20-OSU-01   | 0.00  | 0.00  | 57.21   | Oregon\Swenton (20-01) | 20F23956   | 01  |
| 20F23984     | 17.0 % | Dan Miggins | 20-OSU-01   | 0.00  | 0.00  | 57.21   | Oregon\Swenton (20-01) | 20F23956   | 01  |
| 20F23985     | 17.0 % | Dan Miggins | 20-OSU-01   | 0.00  | 0.00  | 57.21   | Oregon\Swenton (20-01) | 20F23956   | 01  |
| 20F23987     | 17.0 % | Dan Miggins | 20-OSU-01   | 0.00  | 0.00  | 57.21   | Oregon\Swenton (20-01) | 20F23956   | 01  |
| 20F23988     | 17.0 % | Dan Miggins | 20-OSU-01   | 0.00  | 0.00  | 57.21   | Oregon\Swenton (20-01) | 20F23956   | 01  |
| 20F23990     | 17.0 % | Dan Miggins | 20-OSU-01   | 0.00  | 0.00  | 57.21   | Oregon\Swenton (20-01) | 20F23956   | 01  |
| 20F23991     | 17.0 % | Dan Miggins | 20-OSU-01   | 0.00  | 0.00  | 57.21   | Oregon\Swenton (20-01) | 20F23956   | 01  |
| 20F23993     | 17.0 % | Dan Miggins | 20-OSU-01   | 0.00  | 0.00  | 57.21   | Oregon\Swenton (20-01) | 20F23956   | 01  |
| 20F23994     | 17.0 % | Dan Miggins | 20-OSU-01   | 0.00  | 0.00  | 57.21   | Oregon\Swenton (20-01) | 20F23956   | 01  |
| 20F23996     | 17.0 % | Dan Miggins | 20-OSU-01   | 0.00  | 0.00  | 57.21   | Oregon\Swenton (20-01) | 20F23956   | 01  |
| 20F23997     | 17.0 % | Dan Miggins | 20-OSU-01   | 0.00  | 0.00  | 57.21   | Oregon\Swenton (20-01) | 20F23956   | 01  |
| 20F23999     | 17.0 % | Dan Miggins | 20-OSU-01   | 0.00  | 0.00  | 57.21   | Oregon\Swenton (20-01) | 20F23956   | 01  |
| 20F24000     | 17.0 % | Dan Miggins | 20-OSU-01   | 0.00  | 0.00  | 57.21   | Oregon\Swenton (20-01) | 20F23956   | 01  |

| OSU Argon Geochronology Lab<br>CEOAS Oregon State University, Corvallis, USA |        |          |          |               |                  |                  |       |                     |                    |       |            |       |               |       |           |       |              |                        |     |       |      |      |     |        |
|------------------------------------------------------------------------------|--------|----------|----------|---------------|------------------|------------------|-------|---------------------|--------------------|-------|------------|-------|---------------|-------|-----------|-------|--------------|------------------------|-----|-------|------|------|-----|--------|
| Sample Parameters                                                            |        | Sample   | Material | Location      | Standard Name    | Standard (in Ma) | %1σ   | Standard Reference  | Standard 40Ar/39Ar | %1σ   | J          | %1σ   | Air 40Ar/36Ar | %1σ   | MDF (lin) | %1σ   | Volume Ratio | Sensitivity (mol/volt) | Day | Month | Year | Hour | Min | Resist |
| 20F23960                                                                     | 17.0 % | VS19-116 | Sanidine | Rhyolite Dome | FCT-NM (1C47-20) | 28.201           | 0.082 | Kuiper et al (2008) | 9.84623            | 0.151 | 0.00157680 | 0.151 | 298.378       | 0.123 | 1.0001527 | 0.040 | 1            | 3.54E-14               | 4   | SEP   | 2020 | 8    | 22  | 1      |
| 20F23961                                                                     | 17.0 % | VS19-116 | Sanidine | Rhyolite Dome | FCT-NM (1C47-20) | 28.201           | 0.082 | Kuiper et al (2008) | 9.84623            | 0.151 | 0.00157680 | 0.151 | 298.378       | 0.123 | 1.0001527 | 0.040 | 1            | 3.54E-14               | 4   | SEP   | 2020 | 8    | 30  | 1      |
| 20F23963                                                                     | 17.0 % | VS19-116 | Sanidine | Rhyolite Dome | FCT-NM (1C47-20) | 28.201           | 0.082 | Kuiper et al (2008) | 9.84623            | 0.151 | 0.00157680 | 0.151 | 298.378       | 0.123 | 1.0001527 | 0.040 | 1            | 3.54E-14               | 4   | SEP   | 2020 | 8    | 47  | 1      |
| 20F23964                                                                     | 17.0 % | VS19-116 | Sanidine | Rhyolite Dome | FCT-NM (1C47-20) | 28.201           | 0.082 | Kuiper et al (2008) | 9.84623            | 0.151 | 0.00157680 | 0.151 | 298.378       | 0.123 | 1.0001527 | 0.040 | 1            | 3.54E-14               | 4   | SEP   | 2020 | 8    | 56  | 1      |
| 20F23966                                                                     | 17.0 % | VS19-116 | Sanidine | Rhyolite Dome | FCT-NM (1C47-20) | 28.201           | 0.082 | Kuiper et al (2008) | 9.84623            | 0.151 | 0.00157680 | 0.151 | 298.378       | 0.123 | 1.0001527 | 0.040 | 1            | 3.54E-14               | 4   | SEP   | 2020 | 9    | 13  | 1      |
| 20F23967                                                                     | 17.0 % | VS19-116 | Sanidine | Rhyolite Dome | FCT-NM (1C47-20) | 28.201           | 0.082 | Kuiper et al (2008) | 9.84623            | 0.151 | 0.00157680 | 0.151 | 298.378       | 0.123 | 1.0001527 | 0.040 | 1            | 3.54E-14               | 4   | SEP   | 2020 | 9    | 22  | 1      |
| 20F23969                                                                     | 17.0 % | VS19-116 | Sanidine | Rhyolite Dome | FCT-NM (1C47-20) | 28.201           | 0.082 | Kuiper et al (2008) | 9.84623            | 0.151 | 0.00157680 | 0.151 | 298.378       | 0.123 | 1.0001527 | 0.040 | 1            | 3.54E-14               | 4   | SEP   | 2020 | 9    | 39  | 1      |
| 20F23970                                                                     | 17.0 % | VS19-116 | Sanidine | Rhyolite Dome | FCT-NM (1C47-20) | 28.201           | 0.082 | Kuiper et al (2008) | 9.84623            | 0.151 | 0.00157680 | 0.151 | 298.378       | 0.123 | 1.0001527 | 0.040 | 1            | 3.54E-14               | 4   | SEP   | 2020 | 9    | 47  | 1      |
| 20F23972                                                                     | 17.0 % | VS19-116 | Sanidine | Rhyolite Dome | FCT-NM (1C47-20) | 28.201           | 0.082 | Kuiper et al (2008) | 9.84623            | 0.151 | 0.00157680 | 0.151 | 298.378       | 0.123 | 1.0001527 | 0.040 | 1            | 3.54E-14               | 4   | SEP   | 2020 | 10   | 4   | 1      |
| 20F23973                                                                     | 17.0 % | VS19-116 | Sanidine | Rhyolite Dome | FCT-NM (1C47-20) | 28.201           | 0.082 | Kuiper et al (2008) | 9.84623            | 0.151 | 0.00157680 | 0.151 | 298.378       | 0.123 | 1.0001527 | 0.040 | 1            | 3.54E-14               | 4   | SEP   | 2020 | 10   | 13  | 1      |
| 20F23975                                                                     | 17.0 % | VS19-116 | Sanidine | Rhyolite Dome | FCT-NM (1C47-20) | 28.201           | 0.082 | Kuiper et al (2008) | 9.84623            | 0.151 | 0.00157680 | 0.151 | 298.378       | 0.123 | 1.0001527 | 0.040 | 1            | 3.54E-14               | 4   | SEP   | 2020 | 10   | 30  | 1      |
| 20F23976                                                                     | 17.0 % | VS19-116 | Sanidine | Rhyolite Dome | FCT-NM (1C47-20) | 28.201           | 0.082 | Kuiper et al (2008) | 9.84623            | 0.151 | 0.00157680 | 0.151 | 298.378       | 0.123 | 1.0001527 | 0.040 | 1            | 3.54E-14               | 4   | SEP   | 2020 | 10   | 39  | 1      |
| 20F23978                                                                     | 17.0 % | VS19-116 | Sanidine | Rhyolite Dome | FCT-NM (1C47-20) | 28.201           | 0.082 | Kuiper et al (2008) | 9.84623            | 0.151 | 0.00157680 | 0.151 | 298.378       | 0.123 | 1.0001527 | 0.040 | 1            | 3.54E-14               | 4   | SEP   | 2020 | 10   | 56  | 1      |
| 20F23979                                                                     | 17.0 % | VS19-116 | Sanidine | Rhyolite Dome | FCT-NM (1C47-20) | 28.201           | 0.082 | Kuiper et al (2008) | 9.84623            | 0.151 | 0.00157680 | 0.151 | 298.378       | 0.123 | 1.0001527 | 0.040 | 1            | 3.54E-14               | 4   | SEP   | 2020 | 11   | 5   | 1      |
| 20F23981                                                                     | 17.0 % | VS19-116 | Sanidine | Rhyolite Dome | FCT-NM (1C47-20) | 28.201           | 0.082 | Kuiper et al (2008) | 9.84623            | 0.151 | 0.00157680 | 0.151 | 298.378       | 0.123 | 1.0001527 | 0.040 | 1            | 3.54E-14               | 4   | SEP   | 2020 | 11   | 22  | 1      |
| 20F23982                                                                     | 17.0 % | VS19-116 | Sanidine | Rhyolite Dome | FCT-NM (1C47-20) | 28.201           | 0.082 | Kuiper et al (2008) | 9.84623            | 0.151 | 0.00157680 | 0.151 | 298.378       | 0.123 | 1.0001527 | 0.040 | 1            | 3.54E-14               | 4   | SEP   | 2020 | 11   | 30  | 1      |
| 20F23984                                                                     | 17.0 % | VS19-116 | Sanidine | Rhyolite Dome | FCT-NM (1C47-20) | 28.201           | 0.082 | Kuiper et al (2008) | 9.84623            | 0.151 | 0.00157680 | 0.151 | 298.378       | 0.123 | 1.0001527 | 0.040 | 1            | 3.54E-14               | 4   | SEP   | 2020 | 11   | 47  | 1      |
| 20F23985                                                                     | 17.0 % | VS19-116 | Sanidine | Rhyolite Dome | FCT-NM (1C47-20) | 28.201           | 0.082 | Kuiper et al (2008) | 9.84623            | 0.151 | 0.00157680 | 0.151 | 298.378       | 0.123 | 1.0001527 | 0.040 | 1            | 3.54E-14               | 4   | SEP   | 2020 | 11   | 56  | 1      |
| 20F23987                                                                     | 17.0 % | VS19-116 | Sanidine | Rhyolite Dome | FCT-NM (1C47-20) | 28.201           | 0.082 | Kuiper et al (2008) | 9.84623            | 0.151 | 0.00157680 | 0.151 | 298.378       | 0.123 | 1.0001527 | 0.040 | 1            | 3.54E-14               | 4   | SEP   | 2020 | 12   | 13  | 1      |
| 20F23988                                                                     | 17.0 % | VS19-116 | Sanidine | Rhyolite Dome | FCT-NM (1C47-20) | 28.201           | 0.082 | Kuiper et al (2008) | 9.84623            | 0.151 | 0.00157680 | 0.151 | 298.378       | 0.123 | 1.0001527 | 0.040 | 1            | 3.54E-14               | 4   | SEP   | 2020 | 12   | 22  | 1      |
| 20F23990                                                                     | 17.0 % | VS19-116 | Sanidine | Rhyolite Dome | FCT-NM (1C47-20) | 28.201           | 0.082 | Kuiper et al (2008) | 9.84623            | 0.151 | 0.00157680 | 0.151 | 298.378       | 0.123 | 1.0001527 | 0.040 | 1            | 3.54E-14               | 4   | SEP   | 2020 | 12   | 39  | 1      |
| 20F23991                                                                     | 17.0 % | VS19-116 | Sanidine | Rhyolite Dome | FCT-NM (1C47-20) | 28.201           | 0.082 | Kuiper et al (2008) | 9.84623            | 0.151 | 0.00157680 | 0.151 | 298.378       | 0.123 | 1.0001527 | 0.040 | 1            | 3.54E-14               | 4   | SEP   | 2020 | 12   | 48  | 1      |
| 20F23993                                                                     | 17.0 % | VS19-116 | Sanidine | Rhyolite Dome | FCT-NM (1C47-20) | 28.201           | 0.082 | Kuiper et al (2008) | 9.84623            | 0.151 | 0.00157680 | 0.151 | 298.378       | 0.123 | 1.0001527 | 0.040 | 1            | 3.54E-14               | 4   | SEP   | 2020 | 13   | 5   | 1      |
| 20F23994                                                                     | 17.0 % | VS19-116 | Sanidine | Rhyolite Dome | FCT-NM (1C47-20) | 28.201           | 0.082 | Kuiper et al (2008) | 9.84623            | 0.151 | 0.00157680 | 0.151 | 298.378       | 0.123 | 1.0001527 | 0.040 | 1            | 3.54E-14               | 4   | SEP   | 2020 | 13   | 13  | 1      |
| 20F23996                                                                     | 17.0 % | VS19-116 | Sanidine | Rhyolite Dome | FCT-NM (1C47-20) | 28.201           | 0.082 | Kuiper et al (2008) | 9.84623            | 0.151 | 0.00157680 | 0.151 | 298.378       | 0.123 | 1.0001527 | 0.040 | 1            | 3.54E-14               | 4   | SEP   | 2020 | 13   | 30  | 1      |
| 20F23997                                                                     | 17.0 % | VS19-116 | Sanidine | Rhyolite Dome | FCT-NM (1C47-20) | 28.201           | 0.082 | Kuiper et al (2008) | 9.84623            | 0.151 | 0.00157680 | 0.151 | 298.378       | 0.123 | 1.0001527 | 0.040 | 1            | 3.54E-14               | 4   | SEP   | 2020 | 13   | 39  | 1      |
| 20F23999                                                                     | 17.0 % | VS19-116 | Sanidine | Rhyolite Dome | FCT-NM (1C47-20) | 28.201           | 0.082 | Kuiper et al (2008) | 9.84623            | 0.151 | 0.00157680 | 0.151 | 298.378       | 0.123 | 1.0001527 | 0.040 | 1            | 3.54E-14               | 4   | SEP   | 2020 | 13   | 56  | 1      |
| 20F24000                                                                     | 17.0 % | VS19-116 | Sanidine | Rhyolite Dome | FCT-NM (1C47-20) | 28.201           | 0.082 | Kuiper et al (2008) | 9.84623            | 0.151 | 0.00157680 | 0.151 | 298.378       | 0.123 | 1.0001527 | 0.040 | 1            | 3.54E-14               | 4   | SEP   | 2020 | 14   | 5   | 1      |



20F23956.AGE >>> VS19-116 >>> C

a]

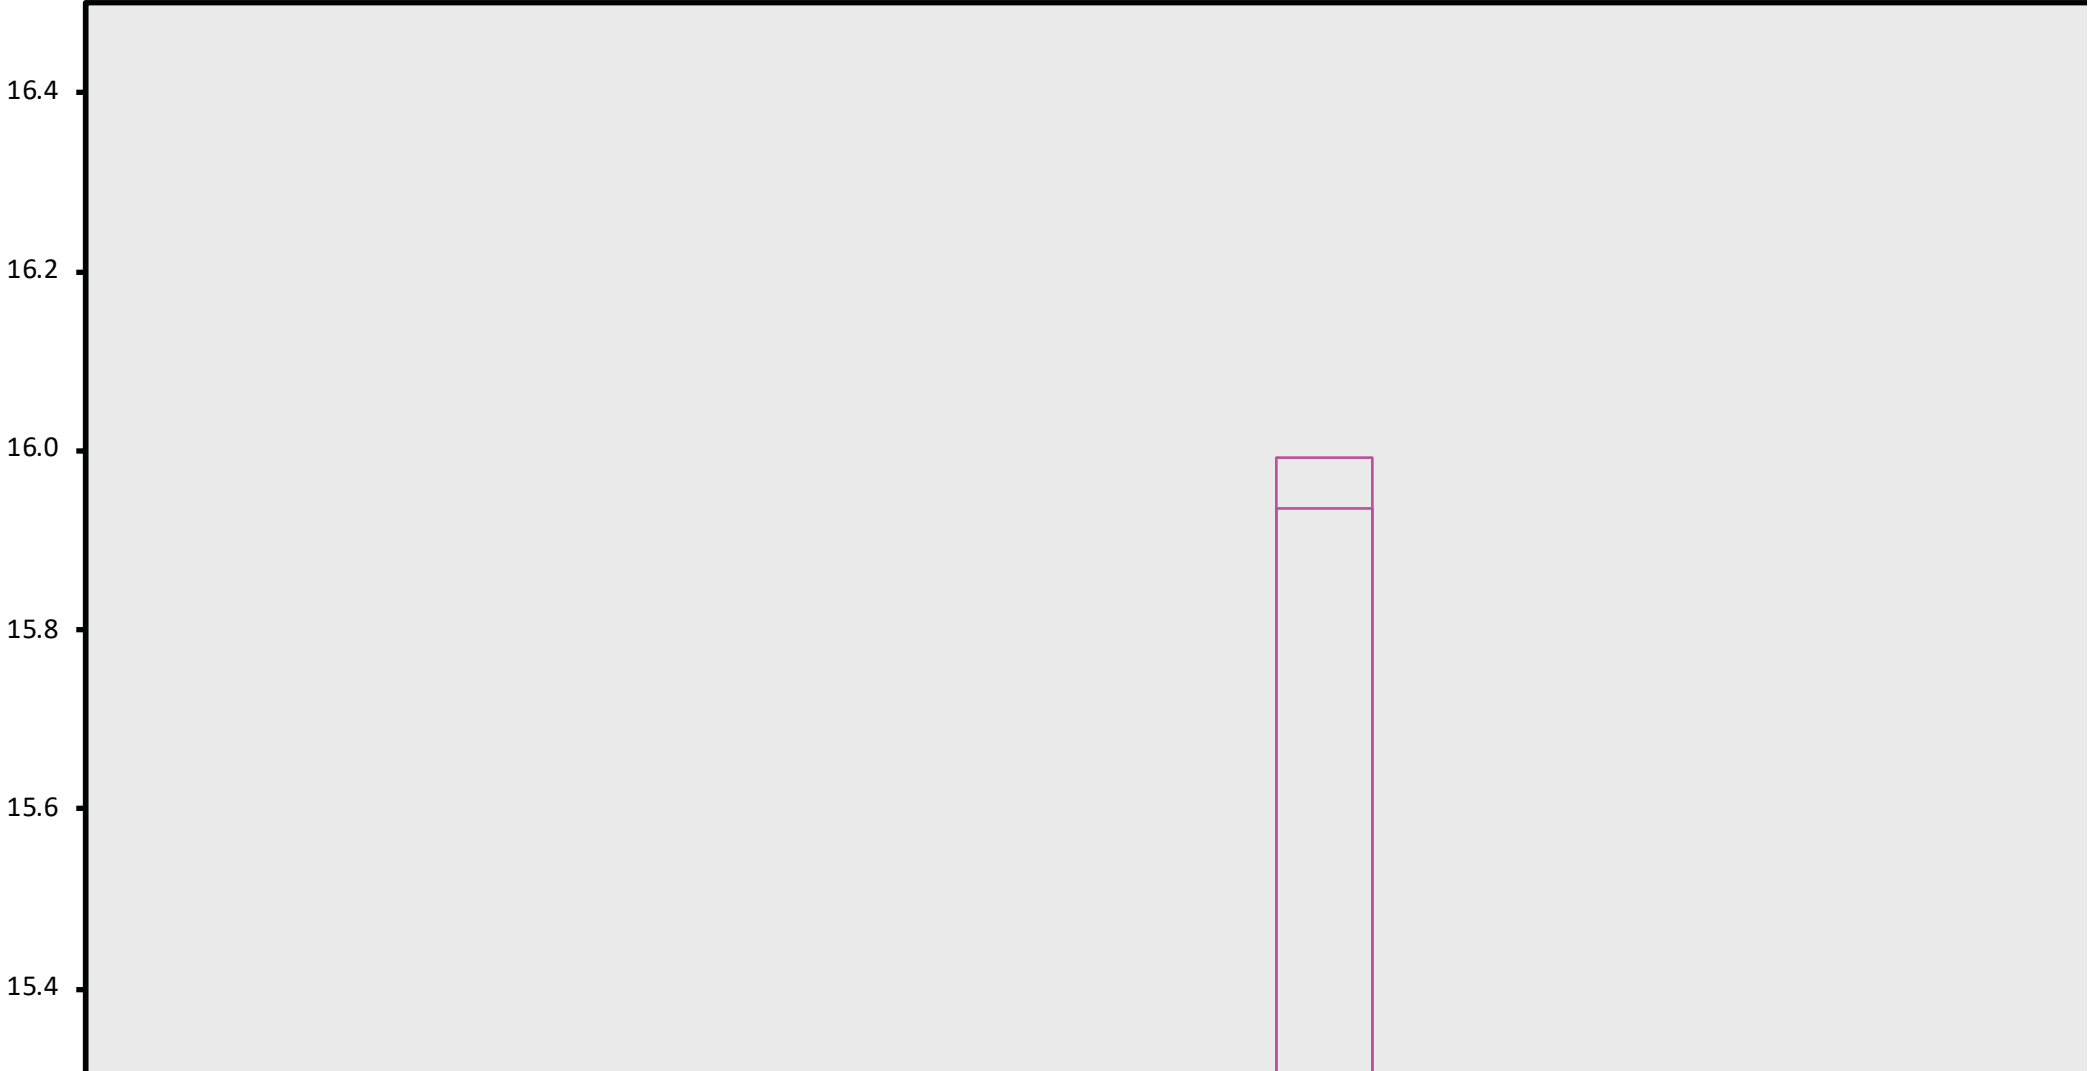

20F23956.AGE >>> VS19-116 >>> OREGON | SWENTON (20-01) PROJECT

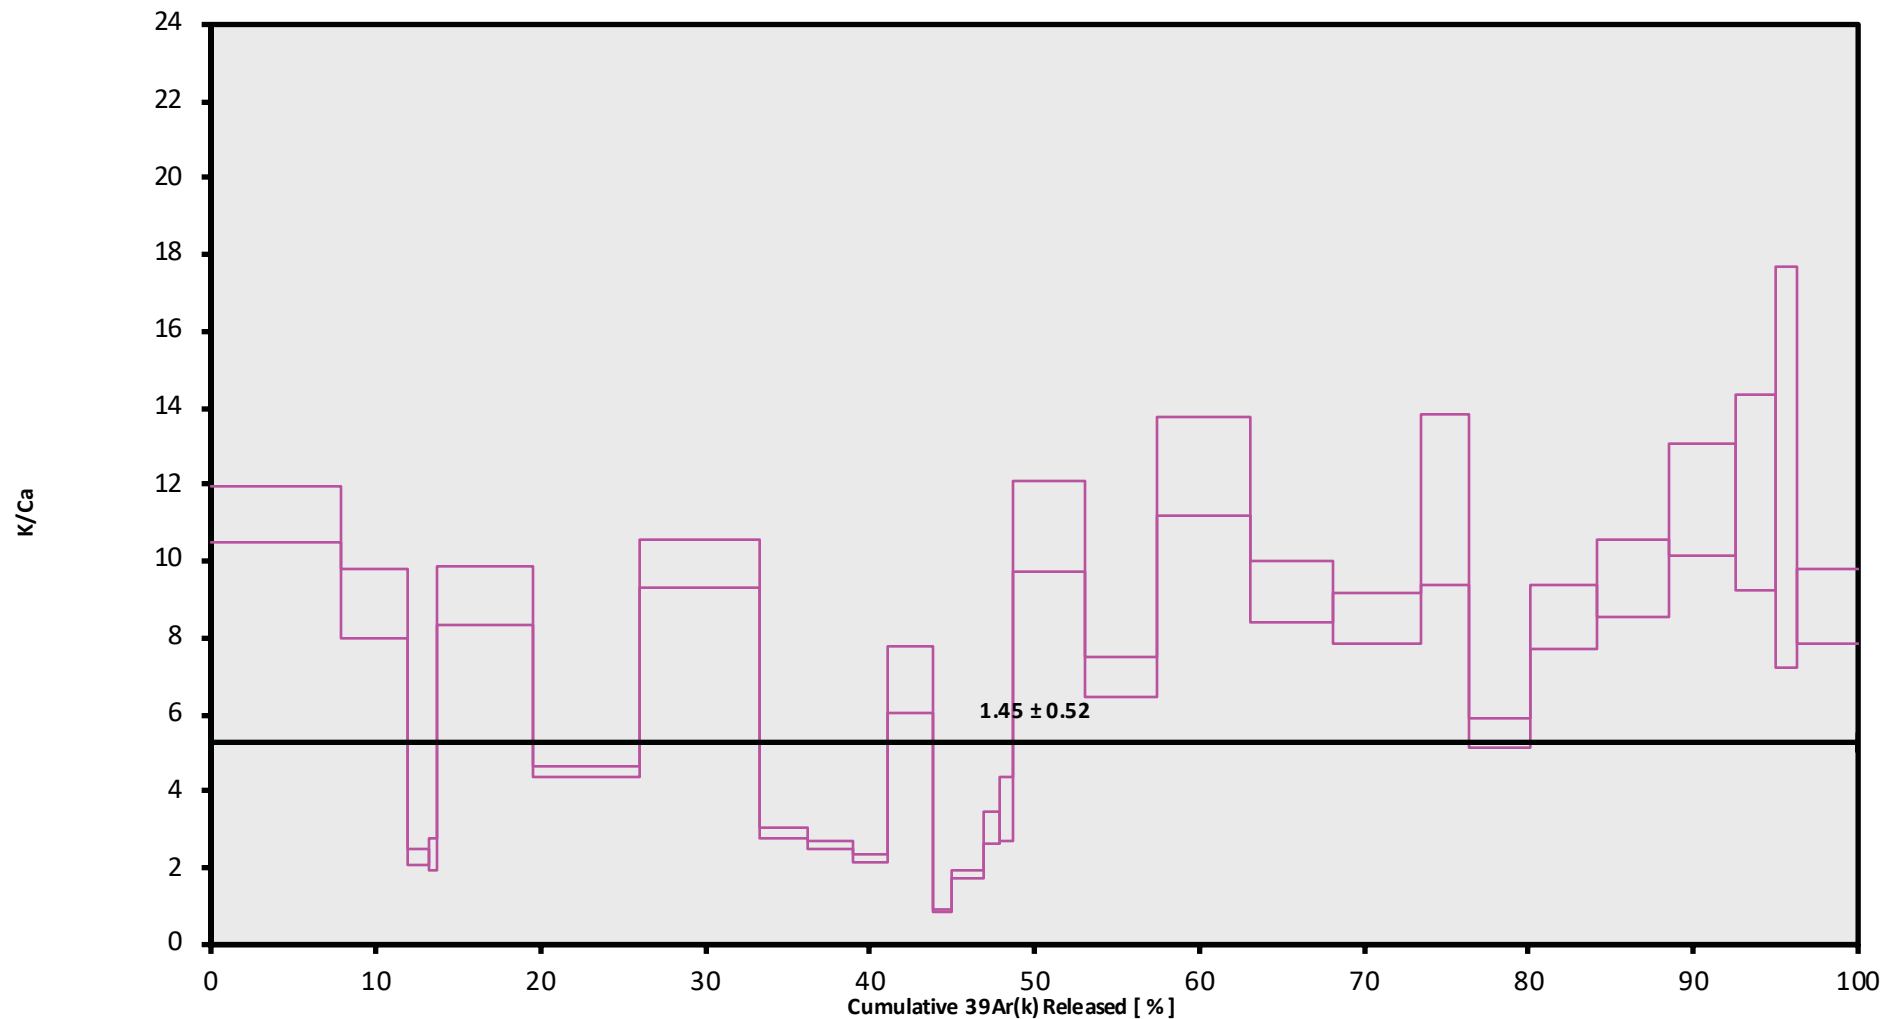

Ar-Ages in Ma

WEIGHTED PLATEAU

$14.78 \pm 0.05$

TOTAL FUSION

$14.82 \pm 0.04$

NORMAL ISOCHRON

$14.77 \pm 0.05$

INVERSE ISOCHRON

$14.77 \pm 0.05$

Sample Info

Sanidine

Rhyolite Dome

Dan Miggins

20F23956.AGE >>> VS19-116 >>> OREGON | SWENTON (20-01) PROJECT

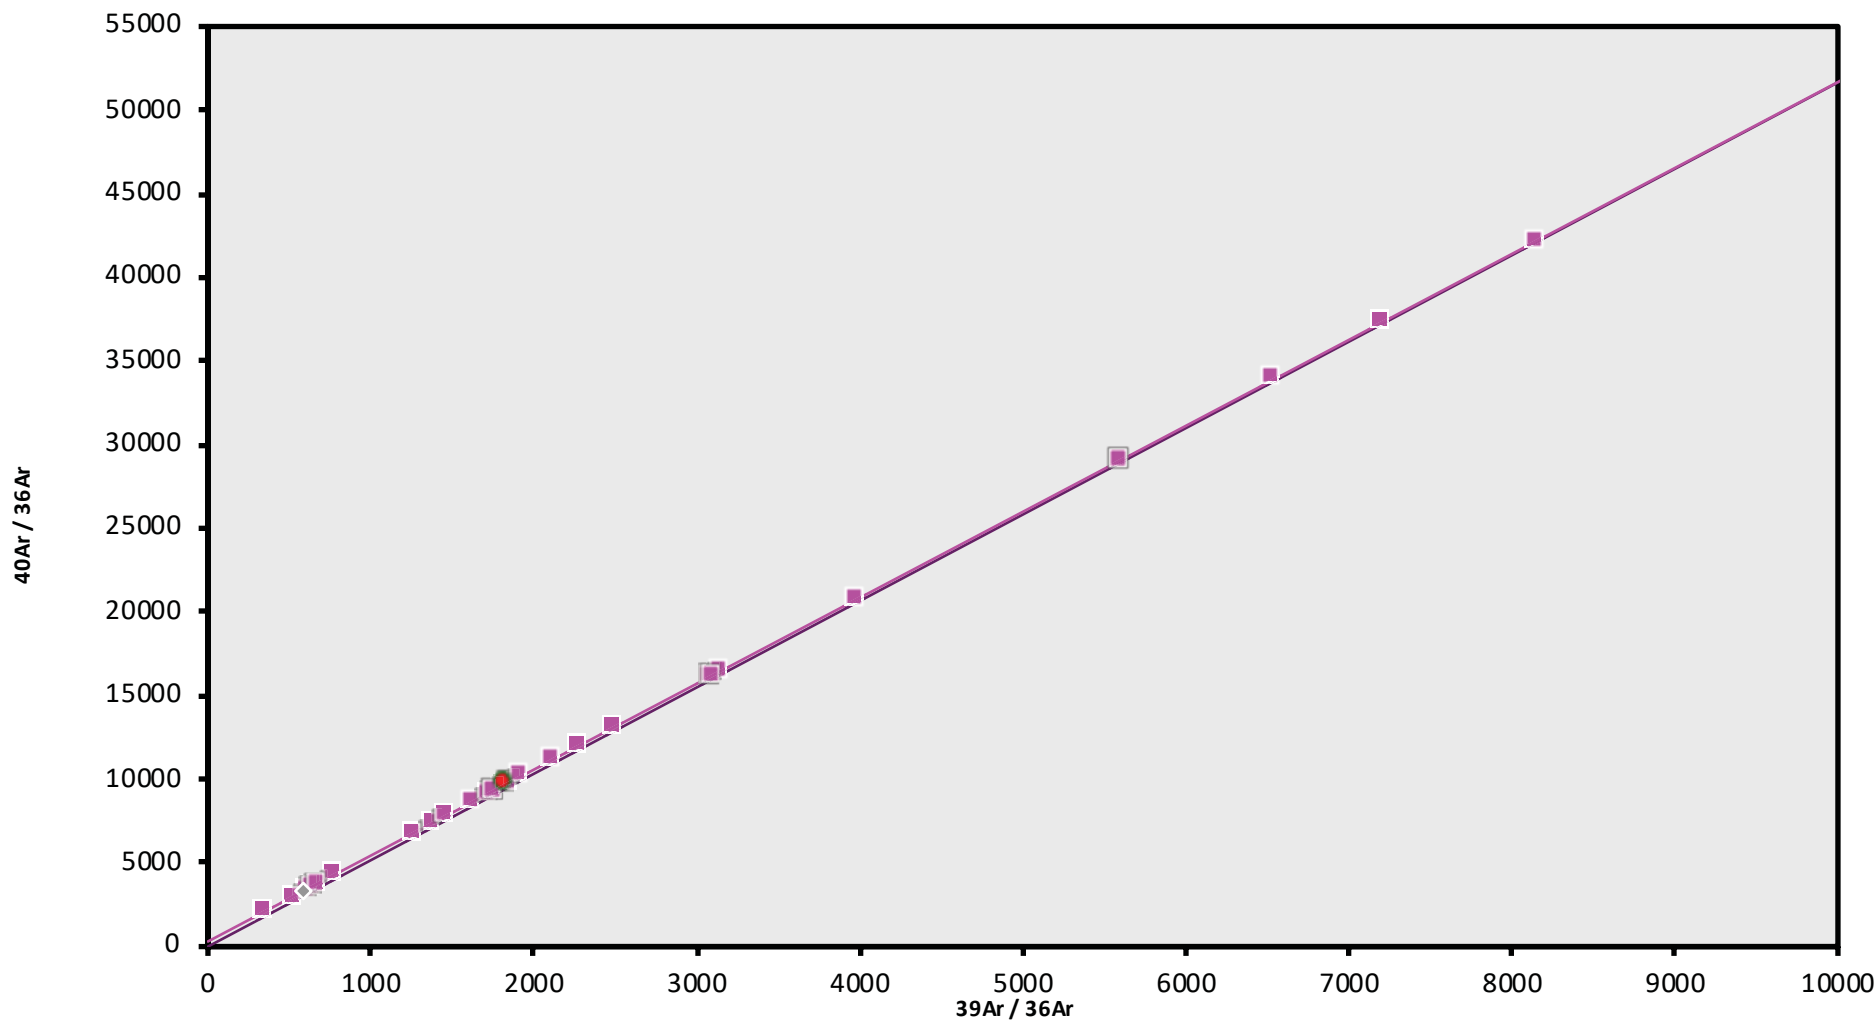

Ar-Ages in Ma

WEIGHTED PLATEAU

14.78 ± 0.05

TOTAL FUSION

14.82 ± 0.04

NORMAL ISOCHRON

14.77 ± 0.05

INVERSE ISOCHRON

14.77 ± 0.05

MSWD (PROBABILITY)

4.35 (0%)

Sample Info

Sanidine

Rhyolite Dome

Dan Miggins

20F23956.AGE >>> VS19-116 >>> OREGON | SWENTON (20-01) PROJECT

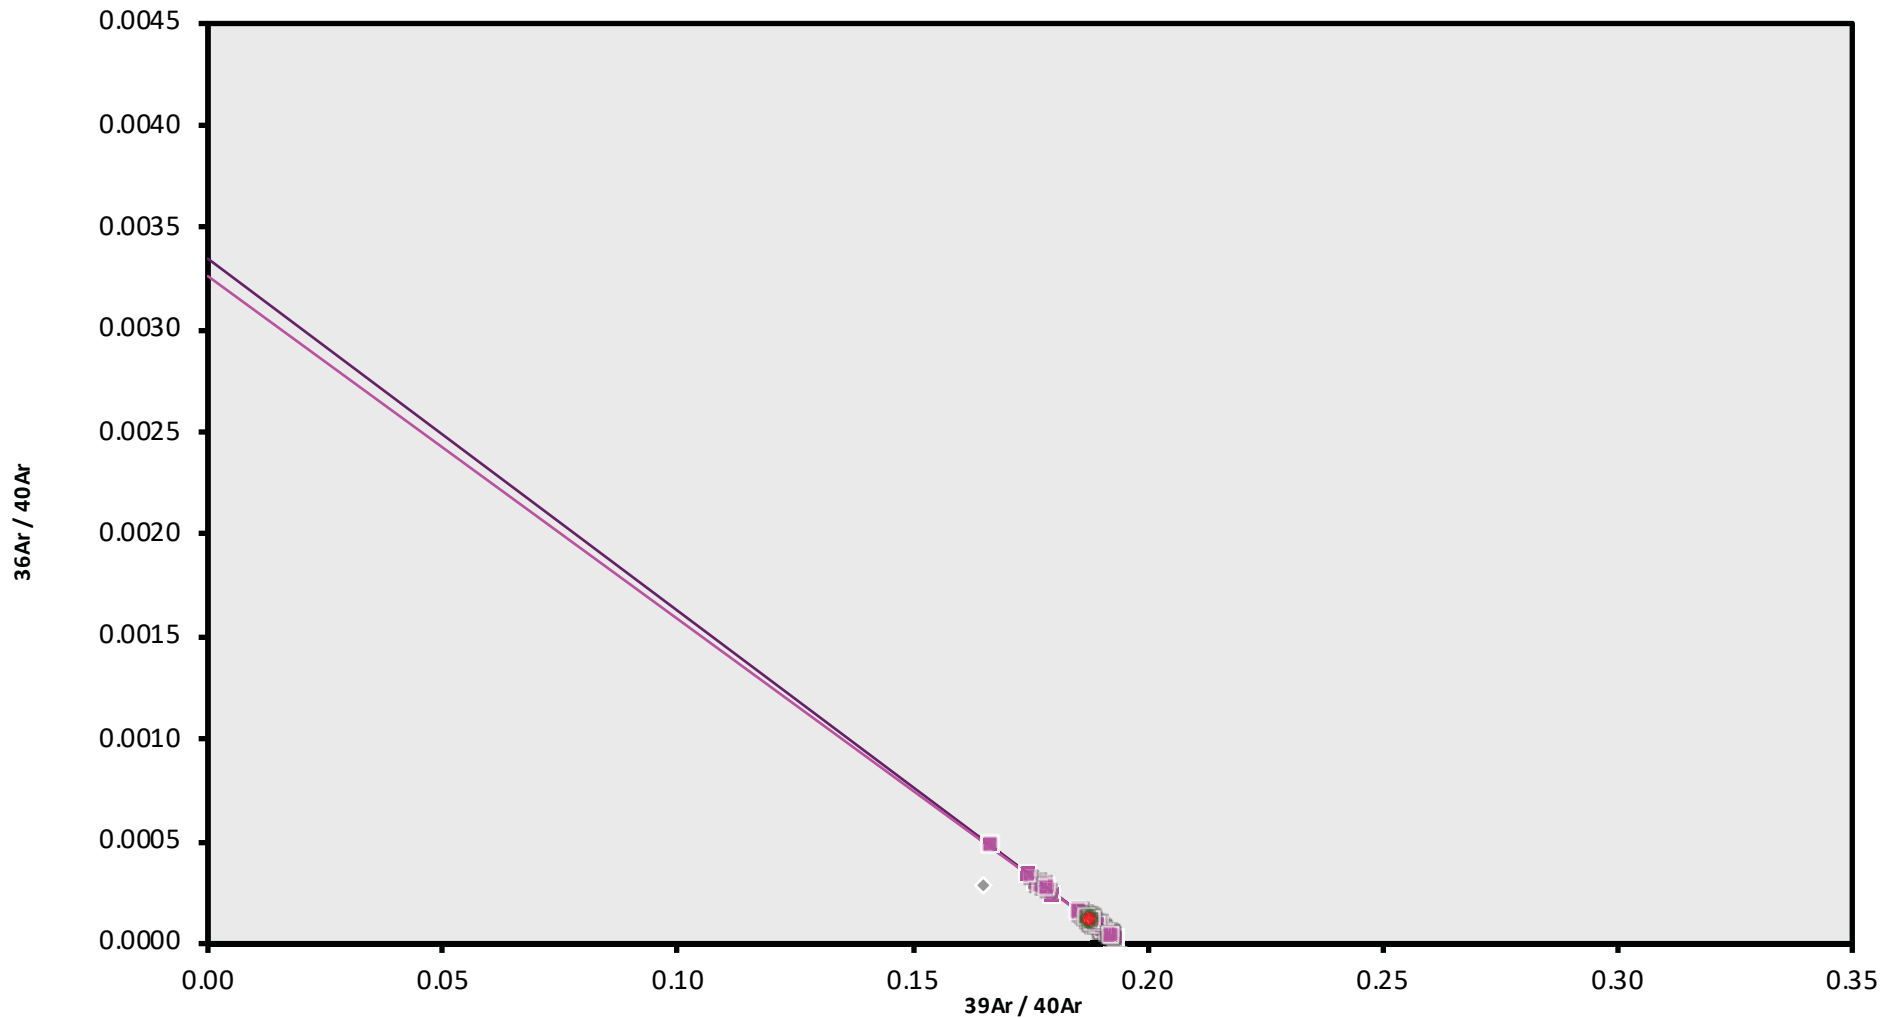

Ar-Ages in Ma

WEIGHTED PLATEAU

$14.78 \pm 0.05$

TOTAL FUSION

$14.82 \pm 0.04$

NORMAL ISOCHRON

$14.77 \pm 0.05$

INVERSE ISOCHRON

$14.77 \pm 0.05$

MSWD (PROBABILITY)

4.19 (0%)

Sample Info

Sanidine

Rhyolite Dome

Dan Miggins



| Relative Abundances |        |   | 36Ar<br>[fA] | %1σ     | 37Ar<br>[fA] | %1σ    | 38Ar<br>[fA] | %1σ     | 39Ar<br>[fA] | %1σ    | 40Ar<br>[fA] | %1σ   | 40(r)/39(k) ± 2σ  | Age ± 2σ<br>(Ma) | 40Ar(r)<br>(%) | 39Ar(k)<br>(%) | K/Ca ± 2σ     |
|---------------------|--------|---|--------------|---------|--------------|--------|--------------|---------|--------------|--------|--------------|-------|-------------------|------------------|----------------|----------------|---------------|
| 21F16196            | 24.0 % | ✓ | 0.0000785    | 401.164 | 3.00850      | 1.336  | 0.0286017    | 34.680  | 1.319801     | 0.704  | 6.24296      | 0.337 | 4.90334 ± 0.16186 | 14.69 ± 0.48     | 103.51         | 2.22           | 0.188 ± 0.006 |
| 21F16197            | 24.0 % | ✓ | 0.0010953    | 30.924  | 3.07314      | 1.302  | 0.0086615    | 115.909 | 1.152027     | 0.768  | 5.54050      | 0.386 | 4.74831 ± 0.19412 | 14.23 ± 0.58     | 98.56          | 1.94           | 0.161 ± 0.005 |
| 21F16199            | 24.0 % | ✓ | 0.0004042    | 79.074  | 4.14350      | 0.981  | 0.0019521    | 485.582 | 1.410606     | 0.653  | 6.45949      | 0.353 | 4.91048 ± 0.15354 | 14.71 ± 0.46     | 107.03         | 2.37           | 0.146 ± 0.003 |
| 21F16200            | 24.0 % | ✓ | 0.0013743    | 26.194  | 3.83768      | 1.055  | 0.0433400    | 21.576  | 2.633780     | 0.369  | 13.06129     | 0.169 | 4.92510 ± 0.09102 | 14.76 ± 0.27     | 99.22          | 4.43           | 0.295 ± 0.007 |
| 21F16202            | 24.0 % | ✓ | 0.0023414    | 14.354  | 7.74228      | 0.545  | 0.0435866    | 21.359  | 3.008953     | 0.301  | 14.58739     | 0.147 | 4.83078 ± 0.07431 | 14.47 ± 0.22     | 99.48          | 5.06           | 0.167 ± 0.002 |
| 21F16203            | 24.0 % | ✓ | 0.0059407    | 5.958   | 3.36471      | 1.164  | 0.0027746    | 334.350 | 0.754920     | 1.180  | 5.33483      | 0.432 | 5.09095 ± 0.31176 | 15.25 ± 0.93     | 71.83          | 1.27           | 0.096 ± 0.003 |
| 21F16205            | 24.0 % | ✓ | 0.0027432    | 12.976  | 0.68753      | 6.228  | 0.0154638    | 57.634  | 0.333778     | 2.828  | 2.55516      | 0.960 | 5.37426 ± 0.72202 | 16.10 ± 2.15     | 70.11          | 0.56           | 0.208 ± 0.029 |
| 21F16206            | 24.0 % | ✓ | 0.0001506    | 231.235 | 3.33234      | 1.191  | 0.0155919    | 57.193  | 1.600404     | 0.594  | 7.57579      | 0.313 | 4.87953 ± 0.14561 | 14.62 ± 0.43     | 102.94         | 2.69           | 0.206 ± 0.005 |
| 21F16208            | 24.0 % | ✓ | 0.0047179    | 7.131   | 8.76302      | 0.529  | 0.0325245    | 27.562  | 1.956804     | 0.469  | 10.00573     | 0.231 | 4.76811 ± 0.11485 | 14.29 ± 0.34     | 92.98          | 3.29           | 0.096 ± 0.001 |
| 21F16209            | 24.0 % | ✓ | 0.0040554    | 7.589   | 10.50998     | 0.448  | 0.0453355    | 19.766  | 4.161089     | 0.229  | 20.25836     | 0.111 | 4.78854 ± 0.05060 | 14.35 ± 0.15     | 98.20          | 7.00           | 0.170 ± 0.002 |
| 21F16211            | 24.0 % | ✓ | 0.0057265    | 5.741   | 13.41213     | 0.395  | 0.0572769    | 16.669  | 6.310736     | 0.153  | 32.42597     | 0.074 | 5.04510 ± 0.03564 | 15.11 ± 0.11     | 98.05          | 10.62          | 0.202 ± 0.002 |
| 21F16212            | 24.0 % | ✓ | 0.0034879    | 10.346  | 8.25018      | 0.544  | 0.0742631    | 13.088  | 4.853220     | 0.196  | 23.84424     | 0.096 | 4.84048 ± 0.04928 | 14.50 ± 0.15     | 98.41          | 8.17           | 0.253 ± 0.003 |
| 21F16214            | 24.0 % | ✓ | 0.0038591    | 9.190   | 12.26690     | 0.395  | 0.0898588    | 10.893  | 5.515555     | 0.180  | 27.14893     | 0.082 | 4.89937 ± 0.04309 | 14.68 ± 0.13     | 99.39          | 9.28           | 0.193 ± 0.002 |
| 21F16215            | 24.0 % | ✓ | 0.0058279    | 5.712   | 9.08537      | 0.487  | 0.0502379    | 18.256  | 2.882767     | 0.341  | 15.23052     | 0.152 | 4.94363 ± 0.07864 | 14.81 ± 0.23     | 93.38          | 4.85           | 0.136 ± 0.002 |
| 21F16217            | 24.0 % | ✓ | 0.0003452    | 97.127  | 2.05085      | 2.066  | 0.0272434    | 35.264  | 0.453568     | 1.929  | 2.07968      | 1.014 | 4.73596 ± 0.48835 | 14.19 ± 1.46     | 102.99         | 0.76           | 0.095 ± 0.005 |
| 21F16218            | 24.0 % | ✓ | 0.0005319    | 62.001  | 1.06081      | 3.693  | 0.0045109    | 195.493 | 0.351612     | 2.579  | 1.94774      | 1.122 | 5.34107 ± 0.63789 | 16.00 ± 1.90     | 96.23          | 0.59           | 0.142 ± 0.013 |
| 21F16220            | 24.0 % | ✓ | 0.0000828    | 361.019 | 0.23558      | 15.336 | 0.0054395    | 170.482 | 0.131196     | 6.537  | 0.38507      | 5.878 | 2.89426 ± 1.45637 | 8.69 ± 4.36      | 98.50          | 0.22           | 0.239 ± 0.080 |
| 21F16221            | 24.0 % | ✓ | 0.0021172    | 14.575  | 1.34042      | 3.051  | 0.0060626    | 151.893 | 0.672968     | 1.399  | 3.48310      | 0.617 | 4.40220 ± 0.30752 | 13.20 ± 0.92     | 84.95          | 1.13           | 0.216 ± 0.014 |
| 21F16223            | 24.0 % | ✓ | 0.0066048    | 5.168   | 0.32861      | 12.879 | 0.0022680    | 387.227 | 0.145570     | 6.066  | 2.83794      | 0.718 | 6.13969 ± 1.61357 | 18.38 ± 4.81     | 31.45          | 0.24           | 0.190 ± 0.054 |
| 21F16224            | 24.0 % | ✓ | 0.0104603    | 3.397   | 4.38999      | 0.942  | 0.309368     | 28.523  | 1.329889     | 0.728  | 9.02958      | 0.250 | 4.71752 ± 0.17747 | 14.14 ± 0.53     | 69.33          | 2.24           | 0.130 ± 0.003 |
| 21F16226            | 24.0 % | ✓ | 0.0047825    | 7.064   | 5.39958      | 0.782  | 0.0417997    | 21.085  | 2.294781     | 0.406  | 12.91303     | 0.177 | 5.20225 ± 0.09975 | 15.58 ± 0.30     | 92.31          | 3.86           | 0.182 ± 0.003 |
| 21F16227            | 24.0 % | ✓ | 0.0020944    | 16.597  | 4.14123      | 1.006  | 0.0471077    | 18.767  | 2.088774     | 0.447  | 10.77589     | 0.186 | 5.02576 ± 0.11093 | 15.06 ± 0.33     | 97.29          | 3.52           | 0.217 ± 0.005 |
| 21F16229            | 24.0 % | ✓ | 0.0049418    | 6.920   | 7.32474      | 0.549  | 0.0772556    | 11.442  | 3.065690     | 0.292  | 15.58091     | 0.149 | 4.80112 ± 0.07401 | 14.39 ± 0.22     | 94.32          | 5.16           | 0.180 ± 0.002 |
| 21F16230            | 24.0 % | ✓ | 0.0028532    | 11.543  | 2.01351      | 2.059  | 0.0018671    | 484.079 | 0.999427     | 0.884  | 5.22427      | 0.433 | 4.54278 ± 0.21770 | 13.61 ± 0.65     | 86.79          | 1.68           | 0.213 ± 0.010 |
| 21F16232            | 24.0 % | ✓ | 0.0051644    | 6.005   | 17.66819     | 0.324  | 0.0445168    | 20.991  | 5.888753     | 0.154  | 29.82315     | 0.083 | 5.05386 ± 0.03618 | 15.14 ± 0.11     | 99.60          | 9.90           | 0.143 ± 0.001 |
| 21F16233            | 24.0 % | ✓ | 0.0580618    | 0.867   | 5.64214      | 0.748  | 0.0209237    | 45.635  | 1.917619     | 0.447  | 26.26923     | 0.089 | 4.90517 ± 0.16592 | 14.70 ± 0.50     | 35.74          | 3.23           | 0.146 ± 0.003 |
| 21F16235            | 24.0 % | ✓ | 0.0090875    | 3.894   | 0.15773      | 26.286 | 0.0143493    | 65.427  | 0.096547     | 8.255  | 3.22771      | 0.632 | 5.47089 ± 2.40933 | 16.38 ± 7.18     | 16.35          | 0.16           | 0.263 ± 0.145 |
| 21F16236            | 24.0 % | ✓ | 0.0025162    | 13.473  | 0.10448      | 37.432 | 0.0236521    | 41.804  | 0.060684     | 13.329 | 0.83706      | 2.397 | 1.56785 ± 3.43183 | 4.71 ± 10.30     | 11.35          | 0.10           | 0.249 ± 0.198 |
| 21F16238            | 24.0 % | ✓ | 0.0085584    | 4.032   | 0.90400      | 4.360  | 0.0394374    | 24.170  | 0.284989     | 2.907  | 3.66703      | 0.626 | 4.16961 ± 0.78150 | 12.50 ± 2.33     | 32.34          | 0.48           | 0.135 ± 0.014 |
| 21F16239            | 24.0 % | ✓ | 0.0010396    | 30.725  | 3.15347      | 1.226  | 0.0117586    | 77.326  | 1.380278     | 0.617  | 6.66832      | 0.346 | 4.79707 ± 0.15431 | 14.37 ± 0.46     | 99.15          | 2.32           | 0.188 ± 0.005 |
| 21F16240            | 24.0 % | ✓ | 0.0050189    | 6.609   | 0.91751      | 4.304  | 0.0200976    | 46.421  | 0.384991     | 2.184  | 3.02664      | 0.737 | 4.16893 ± 0.55907 | 12.50 ± 1.67     | 52.95          | 0.65           | 0.180 ± 0.017 |
| Σ                   |        |   | 0.1652555    | 1.155   | 148.31011    | 0.160  | 0.8036170    | 6.431   | 59.441774    | 0.085  | 328.04751    | 0.038 |                   |                  |                |                |               |

| Information on Analysis<br>and Constants Used in Calculations                                                                                                                                                                                                                                                                                                                                                                                                                                                                                                                                                                                                                                                                                                                                                                                                                                                                                                                                                                              | Results                                                                                                                                                                                                                         | 40(a)/36(a) ± 2σ              | 40(r)/39(k) ± 2σ                                                                       | Age ± 2σ<br>(Ma)            | MSWD                         | 39Ar(k)<br>(%,n)                                                                     | K/Ca ± 2σ     |
|--------------------------------------------------------------------------------------------------------------------------------------------------------------------------------------------------------------------------------------------------------------------------------------------------------------------------------------------------------------------------------------------------------------------------------------------------------------------------------------------------------------------------------------------------------------------------------------------------------------------------------------------------------------------------------------------------------------------------------------------------------------------------------------------------------------------------------------------------------------------------------------------------------------------------------------------------------------------------------------------------------------------------------------------|---------------------------------------------------------------------------------------------------------------------------------------------------------------------------------------------------------------------------------|-------------------------------|----------------------------------------------------------------------------------------|-----------------------------|------------------------------|--------------------------------------------------------------------------------------|---------------|
| Project = <b>SWENTON (20-01)</b><br>Sample = <b>VS20-125A</b><br>Material = <b>Plagioclase (albite?)</b><br>Location = <b>Unknown</b><br>Region = <b>Eastern Oregon</b><br>Analyst = <b>Dan Miggins</b><br>Irradiation = <b>21-OSU-04 (4X17-21)</b><br>Position = <b>X: 0   Y: 0   Z/H: 18.24258 mm</b><br>FCT-NM Age = <b>28.201 ± 0.023 Ma</b><br>FCT-NM Reference = <b>Kuiper et al (2008)</b><br>FCT-NM 40Ar/39Ar Ratio = <b>9.44728 ± 0.01058</b><br>FCT-NM J-value = <b>0.00164338 ± 0.00000184</b><br>Air Shot 40Ar/36Ar = <b>300.3510 ± 0.3754</b><br>Air Shot MDF = <b>0.99850732 ± 0.00040462 (LIN)</b><br>Experiment Type = <b>Total Fusion</b><br>Extraction Method = <b>Single Crystal Laser Heating</b><br>Heating = <b>62 sec</b><br>Isolation = <b>1.50 min</b><br>Instrument = <b>ARGUS-VI-F</b><br>Preferred Age = <b>Ideogram Age</b><br>Age Classification = <b>Eruption Age</b><br>IGSN = <b>Undefined</b><br>Rock Class = <b>Undefined</b><br>Lithology = <b>Undefined</b><br>Lat-Lon = <b>Undefined - Undefined</b> | <b>Age Plateau</b><br><b>Error Mean</b><br><br><br><br><br><br><b>Total Fusion Age</b><br><br><br><br><br><br><b>Normal Isochron</b><br><b>Error Chron</b><br><br><br><br><br><br><b>Inverse Isochron</b><br><b>Error Chron</b> |                               | 4.93533 ± 0.04608<br>± 0.93%<br>Full External Error ± 0.78<br>Analytical Error ± 0.14  | <b>14.79 ± 0.14 ± 0.96%</b> | 8.74<br>0%<br>1.52<br>2.9569 | 100.00<br>31<br>2σ Confidence Limit<br>Error Magnification                           | 0.181 ± 0.018 |
|                                                                                                                                                                                                                                                                                                                                                                                                                                                                                                                                                                                                                                                                                                                                                                                                                                                                                                                                                                                                                                            |                                                                                                                                                                                                                                 |                               | 4.89752 ± 0.02138<br>± 0.444%<br>Full External Error ± 0.76<br>Analytical Error ± 0.06 | <b>14.67 ± 0.07 ± 0.49%</b> |                              | 31                                                                                   | 0.172 ± 0.001 |
|                                                                                                                                                                                                                                                                                                                                                                                                                                                                                                                                                                                                                                                                                                                                                                                                                                                                                                                                                                                                                                            |                                                                                                                                                                                                                                 | <b>298.58 ± 10.59 ± 3.55%</b> | 4.81539 ± 0.04439<br>± 0.92%<br>Full External Error ± 0.76<br>Analytical Error ± 0.13  | <b>14.43 ± 0.14 ± 0.94%</b> | 4.16<br>0%<br>1.53<br>2.0392 | 100.00<br>31<br>2σ Confidence Limit<br>Error Magnification<br>1 Number of Iterations |               |
|                                                                                                                                                                                                                                                                                                                                                                                                                                                                                                                                                                                                                                                                                                                                                                                                                                                                                                                                                                                                                                            |                                                                                                                                                                                                                                 |                               |                                                                                        |                             | 0.0000011908                 | Convergence                                                                          |               |
|                                                                                                                                                                                                                                                                                                                                                                                                                                                                                                                                                                                                                                                                                                                                                                                                                                                                                                                                                                                                                                            |                                                                                                                                                                                                                                 | <b>299.65 ± 15.52 ± 5.18%</b> | 4.93666 ± 0.04783<br>± 0.97%<br>Full External Error ± 0.78<br>Analytical Error ± 0.14  | <b>14.79 ± 0.15 ± 0.99%</b> | 8.94<br>0%<br>1.53<br>2.9901 | 100.00<br>31<br>2σ Confidence Limit<br>Error Magnification<br>3 Number of Iterations |               |
|                                                                                                                                                                                                                                                                                                                                                                                                                                                                                                                                                                                                                                                                                                                                                                                                                                                                                                                                                                                                                                            |                                                                                                                                                                                                                                 |                               |                                                                                        |                             | 0.0000016456<br>153%         | Convergence<br>Spreading Factor                                                      |               |

| Incremental Heating |        |   | 36Ar(a)<br>[fA] | 37Ar(ca)<br>[fA] | 38Ar(cl)<br>[fA] | 39Ar(k)<br>[fA] | 40Ar(r)<br>[fA] | Age ± 2σ<br>(Ma) | 40Ar(r)<br>(%) | 39Ar(k)<br>(%) | K/Ca ± 2σ     |
|---------------------|--------|---|-----------------|------------------|------------------|-----------------|-----------------|------------------|----------------|----------------|---------------|
| 21F16196            | 24.0 % | ✓ | 0.0007362       | 3.00850          | 0.0122831        | 1.317868        | 6.46196         | 14.69 ± 0.48     | 103.51         | 2.22           | 0.188 ± 0.006 |
| 21F16197            | 24.0 % | ✓ | 0.0002646       | 3.07314          | 0.0000000        | 1.150053        | 5.46081         | 14.23 ± 0.58     | 98.56          | 1.94           | 0.161 ± 0.005 |
| 21F16199            | 24.0 % | ✓ | 0.0015242       | 4.14350          | 0.0000000        | 1.407944        | 6.91369         | 14.71 ± 0.46     | 107.03         | 2.37           | 0.146 ± 0.003 |
| 21F16200            | 24.0 % | ✓ | 0.0003356       | 3.83768          | 0.0108076        | 2.631314        | 12.95949        | 14.76 ± 0.27     | 99.22          | 4.43           | 0.295 ± 0.007 |
| 21F16202            | 24.0 % | ✓ | 0.0002479       | 7.74228          | 0.0058672        | 3.003978        | 14.51155        | 14.47 ± 0.22     | 99.48          | 5.06           | 0.167 ± 0.002 |
| 21F16203            | 24.0 % | ✓ | 0.0050312       | 3.36471          | 0.0000000        | 0.752759        | 3.83225         | 15.25 ± 0.93     | 71.83          | 1.27           | 0.096 ± 0.003 |
| 21F16205            | 24.0 % | ✓ | 0.0025573       | 0.68753          | 0.0000000        | 0.333337        | 1.79144         | 16.10 ± 2.15     | 70.11          | 0.56           | 0.208 ± 0.029 |
| 21F16206            | 24.0 % | ✓ | 0.0007501       | 3.33234          | 0.0000000        | 1.598263        | 7.79877         | 14.62 ± 0.43     | 102.94         | 2.69           | 0.206 ± 0.005 |
| 21F16208            | 24.0 % | ✓ | 0.0023484       | 8.76302          | 0.0069402        | 1.951173        | 9.30341         | 14.29 ± 0.34     | 92.98          | 3.29           | 0.096 ± 0.001 |
| 21F16209            | 24.0 % | ✓ | 0.0012146       | 10.50998         | 0.0000000        | 4.154336        | 19.89321        | 14.35 ± 0.15     | 98.20          | 7.00           | 0.170 ± 0.002 |
| 21F16211            | 24.0 % | ✓ | 0.0021012       | 13.41213         | 0.0000000        | 6.302118        | 31.79482        | 15.11 ± 0.11     | 98.05          | 10.62          | 0.202 ± 0.002 |
| 21F16212            | 24.0 % | ✓ | 0.0012561       | 8.25018          | 0.0139929        | 4.847919        | 23.46626        | 14.50 ± 0.15     | 98.41          | 8.17           | 0.253 ± 0.003 |
| 21F16214            | 24.0 % | ✓ | 0.0005408       | 12.26690         | 0.0210326        | 5.507673        | 26.98413        | 14.68 ± 0.13     | 99.39          | 9.28           | 0.193 ± 0.002 |
| 21F16215            | 24.0 % | ✓ | 0.0033705       | 9.08537          | 0.0132225        | 2.876930        | 14.22248        | 14.81 ± 0.23     | 93.38          | 4.85           | 0.136 ± 0.002 |
| 21F16217            | 24.0 % | ✓ | 0.0002091       | 2.05085          | 0.0000000        | 0.452250        | 2.14184         | 14.19 ± 1.46     | 102.99         | 0.76           | 0.095 ± 0.005 |
| 21F16218            | 24.0 % | ✓ | 0.0002451       | 1.06081          | 0.0000000        | 0.350930        | 1.87434         | 16.00 ± 1.90     | 96.23          | 0.59           | 0.142 ± 0.013 |
| 21F16220            | 24.0 % | ✓ | 0.0000191       | 0.23558          | 0.0000000        | 0.131045        | 0.37928         | 8.69 ± 4.36      | 98.50          | 0.22           | 0.239 ± 0.080 |
| 21F16221            | 24.0 % | ✓ | 0.0017549       | 1.34042          | 0.0000000        | 0.672107        | 2.95875         | 13.20 ± 0.92     | 84.95          | 1.13           | 0.216 ± 0.014 |
| 21F16223            | 24.0 % | ✓ | 0.0065159       | 0.32861          | 0.0000000        | 0.145359        | 0.89246         | 18.38 ± 4.81     | 31.45          | 0.24           | 0.190 ± 0.054 |
| 21F16224            | 24.0 % | ✓ | 0.0092722       | 4.38999          | 0.0123718        | 1.327068        | 6.26047         | 14.14 ± 0.53     | 69.33          | 2.24           | 0.130 ± 0.003 |
| 21F16226            | 24.0 % | ✓ | 0.0033215       | 5.39958          | 0.0125295        | 2.291312        | 11.91998        | 15.58 ± 0.30     | 92.31          | 3.86           | 0.182 ± 0.003 |
| 21F16227            | 24.0 % | ✓ | 0.0009724       | 4.14123          | 0.0209850        | 2.086113        | 10.48430        | 15.06 ± 0.33     | 97.29          | 3.52           | 0.217 ± 0.005 |
| 21F16229            | 24.0 % | ✓ | 0.0029572       | 7.32474          | 0.0384122        | 3.060983        | 14.69616        | 14.39 ± 0.22     | 94.32          | 5.16           | 0.180 ± 0.002 |
| 21F16230            | 24.0 % | ✓ | 0.0023090       | 2.01351          | 0.0000000        | 0.998133        | 4.53430         | 13.61 ± 0.65     | 86.79          | 1.68           | 0.213 ± 0.010 |
| 21F16232            | 24.0 % | ✓ | 0.0003887       | 17.66819         | 0.0000000        | 5.877401        | 29.70353        | 15.14 ± 0.11     | 99.60          | 9.90           | 0.143 ± 0.001 |
| 21F16233            | 24.0 % | ✓ | 0.0565367       | 5.64214          | 0.0000000        | 1.913994        | 9.38846         | 14.70 ± 0.50     | 35.74          | 3.23           | 0.146 ± 0.003 |
| 21F16235            | 24.0 % | ✓ | 0.0090434       | 0.15773          | 0.0114514        | 0.096446        | 0.52765         | 16.38 ± 7.18     | 16.35          | 0.16           | 0.263 ± 0.145 |
| 21F16236            | 24.0 % | ✓ | 0.0024852       | 0.10448          | 0.0224328        | 0.060617        | 0.09504         | 4.71 ± 10.30     | 11.35          | 0.10           | 0.249 ± 0.198 |
| 21F16238            | 24.0 % | ✓ | 0.0083098       | 0.90400          | 0.0342735        | 0.284409        | 1.18587         | 12.50 ± 2.33     | 32.34          | 0.48           | 0.135 ± 0.014 |
| 21F16239            | 24.0 % | ✓ | 0.0001872       | 3.15347          | 0.0000000        | 1.378252        | 6.61158         | 14.37 ± 0.46     | 99.15          | 2.32           | 0.188 ± 0.005 |
| 21F16240            | 24.0 % | ✓ | 0.0047691       | 0.91751          | 0.0143911        | 0.384401        | 1.60254         | 12.50 ± 1.67     | 52.95          | 0.65           | 0.180 ± 0.017 |
| Σ                   |        |   | 0.1251362       | 148.31011        | 0.2509935        | 59.346485       | 290.65082       |                  |                |                |               |

| Information on Analysis                                                                                                                                                                                                                                         | Results                   | 40(r)/39(k) ± 2σ             | Age ± 2σ<br>(Ma)                                      | MSWD           | 39Ar(k)<br>(%,n)                           | K/Ca ± 2σ     |
|-----------------------------------------------------------------------------------------------------------------------------------------------------------------------------------------------------------------------------------------------------------------|---------------------------|------------------------------|-------------------------------------------------------|----------------|--------------------------------------------|---------------|
| Project = SWENTON (20-01)<br>Sample = VS20-125A<br>Material = Plagioclase (albite?)<br>Location = Unknown<br>Region = Eastern Oregon<br>Analyst = Dan Miggins<br>Irradiation = 21-OSU-04 (4X17-21)<br>J = 0.00164338 ± 0.00000184<br>FCT-NM = 28.201 ± 0.023 Ma | Age Plateau<br>Error Mean | 4.93533 ± 0.04608<br>± 0.93% | 14.79 ± 0.14<br>± 0.96%                               | 8.74<br>0%     | 100.00<br>31                               | 0.181 ± 0.018 |
|                                                                                                                                                                                                                                                                 |                           |                              | Full External Error ± 0.78<br>Analytical Error ± 0.14 | 1.52<br>2.9569 | 2σ Confidence Limit<br>Error Magnification |               |
|                                                                                                                                                                                                                                                                 | Total Fusion Age          | 4.89752 ± 0.02138<br>± 0.44% | 14.67 ± 0.07<br>± 0.49%                               |                | 31                                         | 0.172 ± 0.001 |
|                                                                                                                                                                                                                                                                 |                           |                              | Full External Error ± 0.76<br>Analytical Error ± 0.06 |                |                                            |               |

| Normal Isochron |        |   | 39(k)/36(a) ± 2σ    | 40(a+r)/36(a) ± 2σ   | r.i.   |
|-----------------|--------|---|---------------------|----------------------|--------|
| 21F16196        | 24.0 % | ✓ | 1790.12 ± 1533.03   | 8478.99 ± 7260.54    | 0.9998 |
| 21F16197        | 24.0 % | ✓ | 4346.51 ± 11133.85  | 20937.14 ± 53631.03  | 1.0000 |
| 21F16199        | 24.0 % | ✓ | 923.75 ± 387.82     | 4237.50 ± 1778.43    | 0.9994 |
| 21F16200        | 24.0 % | ✓ | 7840.70 ± 16828.81  | 38914.80 ± 83524.06  | 1.0000 |
| 21F16202        | 24.0 % | ✓ | 12117.06 ± 32874.33 | 58833.39 ± 159618.32 | 1.0000 |
| 21F16203        | 24.0 % | ✓ | 149.62 ± 21.36      | 1060.25 ± 149.53     | 0.9843 |
| 21F16205        | 24.0 % | ✓ | 130.34 ± 37.05      | 999.07 ± 278.92      | 0.9776 |
| 21F16206        | 24.0 % | ✓ | 2130.69 ± 1979.67   | 10098.20 ± 9381.89   | 0.9999 |
| 21F16208        | 24.0 % | ✓ | 830.85 ± 238.36     | 4260.16 ± 1221.66    | 0.9993 |
| 21F16209        | 24.0 % | ✓ | 3420.39 ± 1735.23   | 16677.23 ± 8460.44   | 0.9999 |
| 21F16211        | 24.0 % | ✓ | 2999.33 ± 939.66    | 15430.49 ± 4834.02   | 0.9999 |
| 21F16212        | 24.0 % | ✓ | 3859.37 ± 2218.89   | 18979.75 ± 10911.94  | 1.0000 |
| 21F16214        | 24.0 % | ✓ | 10184.82 ± 13370.41 | 50197.76 ± 65898.34  | 1.0000 |
| 21F16215        | 24.0 % | ✓ | 853.56 ± 168.82     | 4518.26 ± 893.22     | 0.9993 |
| 21F16217        | 24.0 % | ✓ | 2162.59 ± 6939.42   | 9943.37 ± 31905.10   | 0.9999 |
| 21F16218        | 24.0 % | ✓ | 1431.58 ± 3854.37   | 7944.73 ± 21387.09   | 0.9998 |
| 21F16220        | 24.0 % | ✓ | 6845.54 ± 213959.45 | 20111.35 ± 628585.42 | 1.0000 |
| 21F16221        | 24.0 % | ✓ | 382.99 ± 135.21     | 1984.56 ± 698.82     | 0.9962 |
| 21F16223        | 24.0 % | ✓ | 22.31 ± 3.58        | 435.53 ± 46.08       | 0.6472 |
| 21F16224        | 24.0 % | ✓ | 143.12 ± 11.17      | 973.75 ± 74.83       | 0.9803 |
| 21F16226        | 24.0 % | ✓ | 689.85 ± 140.54     | 3887.33 ± 791.42     | 0.9991 |
| 21F16227        | 24.0 % | ✓ | 2145.24 ± 1534.64   | 11080.00 ± 7925.78   | 0.9999 |
| 21F16229        | 24.0 % | ✓ | 1035.11 ± 239.61    | 5268.24 ± 1219.23    | 0.9996 |
| 21F16230        | 24.0 % | ✓ | 432.29 ± 123.63     | 2262.34 ± 646.08     | 0.9976 |
| 21F16232        | 24.0 % | ✓ | 15121.18 ± 24167.78 | 76718.80 ± 122617.49 | 1.0000 |
| 21F16233        | 24.0 % | ✓ | 33.85 ± 0.67        | 464.62 ± 8.32        | 0.8888 |
| 21F16235        | 24.0 % | ✓ | 10.66 ± 1.95        | 356.91 ± 28.31       | 0.4226 |
| 21F16236        | 24.0 % | ✓ | 24.39 ± 9.31        | 336.80 ± 93.34       | 0.7042 |
| 21F16238        | 24.0 % | ✓ | 34.23 ± 3.47        | 441.27 ± 37.08       | 0.8097 |
| 21F16239        | 24.0 % | ✓ | 7361.15 ± 25130.55  | 35610.56 ± 121571.84 | 1.0000 |
| 21F16240        | 24.0 % | ✓ | 80.60 ± 11.76       | 634.58 ± 88.81       | 0.9487 |

| Results         | 40(a)/36(a) ± 2σ      | 40(r)/39(k) ± 2σ           | Age ± 2σ (Ma)        | MSWD            |
|-----------------|-----------------------|----------------------------|----------------------|-----------------|
| Normal Isochron | 298.58 ± 10.59        | 4.81539 ± 0.04439          | 14.43 ± 0.14         | 4.16            |
| Error Chron     | ± 3.55%               | ± 0.92%                    | ± 0.94%              | 0%              |
|                 |                       | Full External Error ± 0.76 |                      |                 |
|                 |                       | Analytical Error ± 0.13    |                      |                 |
| Statistics      | 2σ Confidence Limit   | 1.53                       | Convergence          | 0.000001190764  |
|                 | Error Magnification   | 2.0392                     | Number of Iterations | 1               |
|                 | Number of Data Points | 31                         | Calculated Line      | Weighted York-2 |

| Inverse Isochron |        |   | 39(k)/40(a+r) ± 2σ    | 36(a)/40(a+r) ± 2σ      | r.i.   |
|------------------|--------|---|-----------------------|-------------------------|--------|
| 21F16196         | 24.0 % | ✓ | 0.2111238 ± 0.0033005 | 0.00011794 ± 0.00010099 | 0.0034 |
| 21F16197         | 24.0 % | ✓ | 0.2075981 ± 0.0035746 | 0.00004776 ± 0.00012234 | 0.0014 |
| 21F16199         | 24.0 % | ✓ | 0.2179941 ± 0.0032416 | 0.00023599 ± 0.00009904 | 0.0080 |
| 21F16200         | 24.0 % | ✓ | 0.2014837 ± 0.0016372 | 0.00002570 ± 0.00005515 | 0.0007 |
| 21F16202         | 24.0 % | ✓ | 0.2059555 ± 0.0013824 | 0.00001700 ± 0.00004611 | 0.0005 |
| 21F16203         | 24.0 % | ✓ | 0.1411146 ± 0.0035560 | 0.00094317 ± 0.00013302 | 0.0210 |
| 21F16205         | 24.0 % | ✓ | 0.1304665 ± 0.0078020 | 0.00100094 ± 0.00027944 | 0.0221 |
| 21F16206         | 24.0 % | ✓ | 0.2109969 ± 0.0028382 | 0.00009903 ± 0.00009200 | 0.0031 |
| 21F16208         | 24.0 % | ✓ | 0.1950287 ± 0.0020443 | 0.00023473 ± 0.00006731 | 0.0071 |
| 21F16209         | 24.0 % | ✓ | 0.2050933 ± 0.0010452 | 0.00005996 ± 0.00003042 | 0.0019 |
| 21F16211         | 24.0 % | ✓ | 0.1943770 ± 0.0006621 | 0.00006481 ± 0.00002030 | 0.0021 |
| 21F16212         | 24.0 % | ✓ | 0.2033413 ± 0.0008891 | 0.00005269 ± 0.00003029 | 0.0015 |
| 21F16214         | 24.0 % | ✓ | 0.2028939 ± 0.0008019 | 0.00001992 ± 0.00002615 | 0.0005 |
| 21F16215         | 24.0 % | ✓ | 0.1889141 ± 0.0014141 | 0.00022132 ± 0.00004375 | 0.0063 |
| 21F16217         | 24.0 % | ✓ | 0.2174905 ± 0.0094995 | 0.00010057 ± 0.00032270 | 0.0029 |
| 21F16218         | 24.0 % | ✓ | 0.1801924 ± 0.0101539 | 0.00012587 ± 0.00033884 | 0.0033 |
| 21F16220         | 24.0 % | ✓ | 0.3403819 ± 0.0598881 | 0.00004972 ± 0.00155411 | 0.0025 |
| 21F16221         | 24.0 % | ✓ | 0.1929852 ± 0.0059089 | 0.00050389 ± 0.00017744 | 0.0141 |
| 21F16223         | 24.0 % | ✓ | 0.0512214 ± 0.0062662 | 0.00229608 ± 0.00024292 | 0.0159 |
| 21F16224         | 24.0 % | ✓ | 0.1469820 ± 0.0022662 | 0.00102696 ± 0.00007891 | 0.0211 |
| 21F16226         | 24.0 % | ✓ | 0.1774609 ± 0.0015743 | 0.00025725 ± 0.00005237 | 0.0069 |
| 21F16227         | 24.0 % | ✓ | 0.1936135 ± 0.0018774 | 0.00009025 ± 0.00006456 | 0.0020 |
| 21F16229         | 24.0 % | ✓ | 0.1964807 ± 0.0012919 | 0.00018982 ± 0.00004393 | 0.0059 |
| 21F16230         | 24.0 % | ✓ | 0.1910791 ± 0.0037659 | 0.00044202 ± 0.00012623 | 0.0133 |
| 21F16232         | 24.0 % | ✓ | 0.1970987 ± 0.0006892 | 0.00001303 ± 0.00002083 | 0.0005 |
| 21F16233         | 24.0 % | ✓ | 0.0728639 ± 0.0006657 | 0.00215230 ± 0.00003852 | 0.0193 |
| 21F16235         | 24.0 % | ✓ | 0.0298812 ± 0.0049532 | 0.00280186 ± 0.00022223 | 0.0122 |
| 21F16236         | 24.0 % | ✓ | 0.0724196 ± 0.0196365 | 0.00296911 ± 0.00082285 | 0.0306 |
| 21F16238         | 24.0 % | ✓ | 0.0775620 ± 0.0046214 | 0.00226620 ± 0.00019043 | 0.0313 |
| 21F16239         | 24.0 % | ✓ | 0.2067126 ± 0.0029286 | 0.00002808 ± 0.00009587 | 0.0010 |
| 21F16240         | 24.0 % | ✓ | 0.1270157 ± 0.0058628 | 0.00157583 ± 0.00022055 | 0.0337 |

| Results          | 40(a)/36(a) ± 2σ      | 40(r)/39(k) ± 2σ  | Age ± 2σ (Ma)              | MSWD            |
|------------------|-----------------------|-------------------|----------------------------|-----------------|
| Inverse Isochron | 299.65 ± 15.52        | 4.93666 ± 0.04783 | 14.79 ± 0.15               | 8.94            |
| Error Chron      | ± 5.18%               | ± 0.97%           | ± 0.99%                    | 0%              |
|                  |                       |                   | Full External Error ± 0.78 |                 |
|                  |                       |                   | Analytical Error ± 0.14    |                 |
| Statistics       | 2σ Confidence Limit   | 1.53              | Convergence                | 0.0000016456    |
|                  | Error Magnification   | 2.9901            | Number of Iterations       | 3               |
|                  | Number of Data Points | 31                | Calculated Line            | Weighted York-2 |
|                  | Spreading Factor      | 153.3%            |                            |                 |

| Degassing Patterns |        |   | 36Ar(a)<br>[fA] | %1σ    | 36Ar(c)<br>[fA] | %1σ  | 36Ar(ca)<br>[fA] | %1σ   | 36Ar(cl)<br>[fA] | %1σ    | 37Ar(ca)<br>[fA] | %1σ   | 38Ar(a)<br>[fA] | %1σ    | 38Ar(c)<br>[fA] | %1σ  | 38Ar(k)<br>[fA] | %1σ   | 38Ar(ca)<br>[fA] | %1σ   | 38Ar(cl)<br>[fA] | %1σ    | 39Ar(k)<br>[fA] | %1σ   | 39Ar(ca)<br>[fA] | %1σ   | 40Ar(r)<br>[fA] | %1σ    | 40Ar(a)<br>[fA] | %1σ    | 40Ar(c)<br>[fA] | %1σ  | 40Ar(k)<br>[fA] | %1σ   |
|--------------------|--------|---|-----------------|--------|-----------------|------|------------------|-------|------------------|--------|------------------|-------|-----------------|--------|-----------------|------|-----------------|-------|------------------|-------|------------------|--------|-----------------|-------|------------------|-------|-----------------|--------|-----------------|--------|-----------------|------|-----------------|-------|
| 21F16196           | 24.0 % | ✓ | 0.0007362       | 42.81  | 0.0000000       | 0.00 | 0.0008132        | 1.35  | 0.0000015        | 80.77  | 3.00850          | 1.34  | 0.0001388       | 42.81  | 0.0000000       | 0.00 | 0.0159159       | 0.71  | 0.0005415        | 9.72  | 0.0122831        | 80.77  | 1.317868        | 0.71  | 0.0019330        | 1.62  | 6.46196         | 1.49   | 0.219797        | 42.81  | 0.0000000       | 0.00 | 0.0007999       | 9.68  |
| 21F16197           | 24.0 % | ✓ | 0.0002646       | 128.08 | 0.0000000       | 0.00 | 0.0008307        | 1.31  | 0.0000000        | 0.00   | 3.07314          | 1.30  | 0.0000499       | 128.08 | 0.0000000       | 0.00 | 0.0138892       | 0.77  | 0.0005532        | 9.72  | 0.0000000        | 0.00   | 1.150053        | 0.77  | 0.0019745        | 1.59  | 5.46081         | 1.89   | 0.078997        | 128.08 | 0.0000000       | 0.00 | 0.0006981       | 9.68  |
| 21F16199           | 24.0 % | ✓ | 0.0015242       | 20.98  | 0.0000000       | 0.00 | 0.0011200        | 1.00  | 0.0000000        | 0.00   | 4.14350          | 0.98  | 0.0002873       | 20.98  | 0.0000000       | 0.00 | 0.0170037       | 0.66  | 0.0007458        | 9.68  | 0.0000000        | 0.00   | 1.407944        | 0.65  | 0.0026622        | 1.35  | 6.91369         | 1.42   | 0.455054        | 20.98  | 0.0000000       | 0.00 | 0.0008546       | 9.67  |
| 21F16200           | 24.0 % | ✓ | 0.0003356       | 107.32 | 0.0000000       | 0.00 | 0.0010373        | 1.07  | 0.0000013        | 86.55  | 3.83768          | 1.06  | 0.0000633       | 107.32 | 0.0000000       | 0.00 | 0.0317784       | 0.38  | 0.0006908        | 9.69  | 0.0108076        | 86.55  | 2.631314        | 0.37  | 0.0024657        | 1.40  | 12.95949        | 0.85   | 0.100196        | 107.32 | 0.0000000       | 0.00 | 0.0015972       | 9.66  |
| 21F16202           | 24.0 % | ✓ | 0.0002479       | 135.65 | 0.0000000       | 0.00 | 0.0020927        | 0.57  | 0.0000007        | 158.72 | 7.74228          | 0.55  | 0.0000467       | 135.65 | 0.0000000       | 0.00 | 0.0362790       | 0.31  | 0.0013936        | 9.65  | 0.0058672        | 158.72 | 3.003978        | 0.30  | 0.0049744        | 1.07  | 14.51155        | 0.71   | 0.074017        | 135.65 | 0.0000000       | 0.00 | 0.0018234       | 9.65  |
| 21F16203           | 24.0 % | ✓ | 0.0050312       | 7.04   | 0.0000000       | 0.00 | 0.0009095        | 1.18  | 0.0000000        | 0.00   | 3.36471          | 1.16  | 0.0009484       | 7.04   | 0.0000000       | 0.00 | 0.0090911       | 1.19  | 0.0006056        | 9.70  | 0.0000000        | 0.00   | 0.752759        | 1.18  | 0.0021618        | 1.48  | 3.83225         | 2.82   | 1.502125        | 7.04   | 0.0000000       | 0.00 | 0.0004569       | 9.72  |
| 21F16205           | 24.0 % | ✓ | 0.0025573       | 13.93  | 0.0000000       | 0.00 | 0.0001858        | 6.23  | 0.0000000        | 0.00   | 0.68753          | 6.23  | 0.0004821       | 13.93  | 0.0000000       | 0.00 | 0.0040257       | 2.83  | 0.0001238        | 11.47 | 0.0000000        | 0.00   | 0.333337        | 2.83  | 0.0004417        | 6.30  | 1.79144         | 6.09   | 0.763522        | 13.93  | 0.0000000       | 0.00 | 0.0002023       | 10.06 |
| 21F16206           | 24.0 % | ✓ | 0.0007501       | 46.45  | 0.0000000       | 0.00 | 0.0009007        | 1.20  | 0.0000000        | 0.00   | 3.33234          | 1.19  | 0.0001414       | 46.45  | 0.0000000       | 0.00 | 0.0193022       | 0.60  | 0.0005998        | 9.70  | 0.0000000        | 0.00   | 1.598263        | 0.60  | 0.0021410        | 1.50  | 7.79877         | 1.37   | 0.223954        | 46.45  | 0.0000000       | 0.00 | 0.0009701       | 9.67  |
| 21F16208           | 24.0 % | ✓ | 0.0023484       | 14.34  | 0.0000000       | 0.00 | 0.0023686        | 0.56  | 0.0000009        | 129.21 | 8.76302          | 0.53  | 0.0004427       | 14.34  | 0.0000000       | 0.00 | 0.0235643       | 0.48  | 0.0015773        | 9.64  | 0.0069402        | 129.21 | 1.951173        | 0.47  | 0.0056302        | 1.06  | 9.30341         | 1.11   | 0.701136        | 14.34  | 0.0000000       | 0.00 | 0.0011844       | 9.66  |
| 21F16209           | 24.0 % | ✓ | 0.0012146       | 25.37  | 0.0000000       | 0.00 | 0.0028408        | 0.48  | 0.0000000        | 0.00   | 10.50998         | 0.45  | 0.0002289       | 25.37  | 0.0000000       | 0.00 | 0.0501719       | 0.25  | 0.0018918        | 9.64  | 0.0000000        | 0.00   | 4.154336        | 0.23  | 0.0067527        | 1.02  | 19.89321        | 0.48   | 0.362625        | 25.37  | 0.0000000       | 0.00 | 0.0025217       | 9.65  |
| 21F16211           | 24.0 % | ✓ | 0.0021012       | 15.66  | 0.0000000       | 0.00 | 0.0036253        | 0.43  | 0.0000000        | 0.00   | 13.41213         | 0.40  | 0.0003961       | 15.66  | 0.0000000       | 0.00 | 0.0761107       | 0.18  | 0.0024142        | 9.64  | 0.0000000        | 0.00   | 6.302118        | 0.15  | 0.0086173        | 1.00  | 31.79482        | 0.32   | 0.627327        | 15.66  | 0.0000000       | 0.00 | 0.0038254       | 9.65  |
| 21F16212           | 24.0 % | ✓ | 0.0012561       | 28.75  | 0.0000000       | 0.00 | 0.0022300        | 0.57  | 0.0000017        | 69.49  | 8.25018          | 0.54  | 0.0002368       | 28.75  | 0.0000000       | 0.00 | 0.0585483       | 0.22  | 0.0014850        | 9.65  | 0.0139929        | 69.50  | 4.847919        | 0.20  | 0.0053007        | 1.07  | 23.46626        | 0.47   | 0.375034        | 28.75  | 0.0000000       | 0.00 | 0.0029427       | 9.65  |
| 21F16214           | 24.0 % | ✓ | 0.0005408       | 65.64  | 0.0000000       | 0.00 | 0.0033157        | 0.43  | 0.0000026        | 46.57  | 12.26690         | 0.39  | 0.0001019       | 65.64  | 0.0000000       | 0.00 | 0.0665162       | 0.20  | 0.0022080        | 9.64  | 0.0210326        | 46.58  | 5.507673        | 0.18  | 0.0078815        | 1.00  | 26.98413        | 0.40   | 0.161453        | 65.64  | 0.0000000       | 0.00 | 0.0033432       | 9.65  |
| 21F16215           | 24.0 % | ✓ | 0.0033705       | 9.88   | 0.0000000       | 0.00 | 0.0024558        | 0.52  | 0.0000016        | 69.39  | 9.08537          | 0.49  | 0.0006353       | 9.88   | 0.0000000       | 0.00 | 0.0347447       | 0.35  | 0.0016354        | 9.64  | 0.0132225        | 69.40  | 2.876930        | 0.34  | 0.0058373        | 1.04  | 14.22248        | 0.72   | 1.006294        | 9.88   | 0.0000000       | 0.00 | 0.0017463       | 9.66  |
| 21F16217           | 24.0 % | ✓ | 0.0002091       | 160.43 | 0.0000000       | 0.00 | 0.0005543        | 2.07  | 0.0000000        | 0.00   | 2.05085          | 2.07  | 0.0000394       | 160.43 | 0.0000000       | 0.00 | 0.0054618       | 1.94  | 0.0003692        | 9.85  | 0.0000000        | 0.00   | 0.452250        | 1.93  | 0.0013177        | 2.26  | 2.14184         | 4.78   | 0.062436        | 160.43 | 0.0000000       | 0.00 | 0.0002745       | 9.84  |
| 21F16218           | 24.0 % | ✓ | 0.0002451       | 134.59 | 0.0000000       | 0.00 | 0.0002867        | 3.70  | 0.0000000        | 0.00   | 1.06081          | 3.69  | 0.0000462       | 134.59 | 0.0000000       | 0.00 | 0.0042382       | 2.59  | 0.0001909        | 10.31 | 0.0000000        | 0.00   | 0.350930        | 2.58  | 0.0006816        | 3.81  | 1.87434         | 5.38   | 0.073187        | 134.59 | 0.0000000       | 0.00 | 0.0002130       | 9.99  |
| 21F16220           | 24.0 % | ✓ | 0.0000191       | #####  | 0.0000000       | 0.00 | 0.0000637        | 15.34 | 0.0000000        | 0.00   | 0.23558          | 15.34 | 0.0000036       | #####  | 0.0000000       | 0.00 | 0.0015826       | 6.55  | 0.0000424        | 18.11 | 0.0000000        | 0.00   | 0.131045        | 6.54  | 0.0001514        | 15.36 | 0.37928         | 24.29  | 0.005715        | #####  | 0.0000000       | 0.00 | 0.0000795       | 11.66 |
| 21F16221           | 24.0 % | ✓ | 0.0017549       | 17.60  | 0.0000000       | 0.00 | 0.0003623        | 3.06  | 0.0000000        | 0.00   | 1.34042          | 3.05  | 0.0003308       | 17.60  | 0.0000000       | 0.00 | 0.0081170       | 1.40  | 0.0002413        | 10.10 | 0.0000000        | 0.00   | 0.672107        | 1.40  | 0.0008612        | 3.19  | 2.95875         | 3.20   | 0.523941        | 17.60  | 0.0000000       | 0.00 | 0.0004080       | 9.75  |
| 21F16223           | 24.0 % | ✓ | 0.0065159       | 5.24   | 0.0000000       | 0.00 | 0.0000888        | 12.88 | 0.0000000        | 0.00   | 0.32861          | 12.88 | 0.0012283       | 5.24   | 0.0000000       | 0.00 | 0.0017555       | 6.08  | 0.0000592        | 16.08 | 0.0000000        | 0.00   | 0.145359        | 6.07  | 0.0002111        | 12.91 | 0.89246         | 11.65  | 1.945396        | 5.24   | 0.0000000       | 0.00 | 0.0000882       | 11.40 |
| 21F16224           | 24.0 % | ✓ | 0.0092722       | 3.83   | 0.0000000       | 0.00 | 0.0011866        | 0.96  | 0.0000015        | 71.34  | 4.38999          | 0.94  | 0.0017478       | 3.84   | 0.0000000       | 0.00 | 0.0160270       | 0.73  | 0.0007902        | 9.68  | 0.0123718        | 71.35  | 1.327068        | 0.73  | 0.0028206        | 1.32  | 6.26047         | 1.73   | 2.768304        | 3.84   | 0.0000000       | 0.00 | 0.0008055       | 9.68  |
| 21F16226           | 24.0 % | ✓ | 0.0033215       | 10.18  | 0.0000000       | 0.00 | 0.0014595        | 0.80  | 0.0000015        | 70.36  | 5.39958          | 0.78  | 0.0006261       | 10.18  | 0.0000000       | 0.00 | 0.0276722       | 0.42  | 0.0009719        | 9.66  | 0.0125295        | 70.37  | 2.291312        | 0.41  | 0.0034692        | 1.21  | 11.91998        | 0.87   | 0.991659        | 10.18  | 0.0000000       | 0.00 | 0.0013908       | 9.66  |
| 21F16227           | 24.0 % | ✓ | 0.0009724       | 35.77  | 0.0000000       | 0.00 | 0.0011194        | 1.02  | 0.0000026        | 42.15  | 4.14123          | 1.01  | 0.0001833       | 35.77  | 0.0000000       | 0.00 | 0.0251940       | 0.46  | 0.0007454        | 9.68  | 0.0209850        | 42.16  | 2.086113        | 0.45  | 0.0026607        | 1.36  | 10.48430        | 1.01   | 0.290332        | 35.77  | 0.0000000       | 0.00 | 0.0012663       | 9.66  |
| 21F16229           | 24.0 % | ✓ | 0.0029572       | 11.57  | 0.0000000       | 0.00 | 0.0019799        | 0.58  | 0.0000047        | 23.04  | 7.32474          | 0.55  | 0.0005574       | 11.57  | 0.0000000       | 0.00 | 0.0369675       | 0.31  | 0.0013185        | 9.65  | 0.0384122        | 23.06  | 3.060983        | 0.29  | 0.0047061        | 1.07  | 14.69616        | 0.71   | 0.882891        | 11.57  | 0.0000000       | 0.00 | 0.0018580       | 9.65  |
| 21F16230           | 24.0 % | ✓ | 0.0023090       | 14.27  | 0.0000000       | 0.00 | 0.0005443        | 2.07  | 0.0000000        | 0.00   | 2.01351          | 2.06  | 0.0004352       | 14.27  | 0.0000000       | 0.00 | 0.0120545       | 0.89  | 0.0003624        | 9.85  | 0.0000000        | 0.00   | 0.998133        | 0.89  | 0.0012937        | 2.26  | 4.53430         | 2.23   | 0.689365        | 14.27  | 0.0000000       | 0.00 | 0.0006059       | 9.69  |
| 21F16232           | 24.0 % | ✓ | 0.0003887       | 79.91  | 0.0000000       | 0.00 | 0.0047757        | 0.37  | 0.0000000        | 0.00   | 17.66819         | 0.32  | 0.0000733       | 79.91  | 0.0000000       | 0.00 | 0.0709814       | 0.18  | 0.0031803        | 9.64  | 0.0000000        | 0.00   | 5.877401        | 0.15  | 0.0113518        | 0.98  | 29.70353        | 0.32   | 0.116046        | 79.91  | 0.0000000       | 0.00 | 0.0035676       | 9.65  |
| 21F16233           | 24.0 % | ✓ | 0.0565367       | 0.89   | 0.0000000       | 0.00 | 0.0015251        | 0.77  | 0.0000000        | 0.00   | 5.64214          | 0.75  | 0.0106572       | 0.90   | 0.0000000       | 0.00 | 0.0231153       | 0.46  | 0.0010156        | 9.66  | 0.0000000        | 0.00   | 1.913994        | 0.45  | 0.0036251        | 1.19  | 9.38846         | 1.63   | 16.879609       | 0.90   | 0.0000000       | 0.00 | 0.0011618       | 9.66  |
| 21F16235           | 24.0 % | ✓ | 0.0090434       | 3.91   | 0.0000000       | 0.00 | 0.0000426        | 26.29 | 0.0000014        | 82.00  | 0.15773          | 26.29 | 0.0017047       | 3.92   | 0.0000000       | 0.00 | 0.0011648       | 8.26  | 0.0000284        | 27.99 | 0.0114514        | 82.00  | 0.096446        | 8.26  | 0.0001013        | 26.30 | 0.52765         | 20.41  | 2.700004        | 3.92   | 0.0000000       | 0.00 | 0.0000585       | 12.71 |
| 21F16236           | 24.0 % | ✓ | 0.0024852       | 13.65  | 0.0000000       | 0.00 | 0.0000282        | 37.43 | 0.0000028        | 44.09  | 0.10448          | 37.43 | 0.0004685       | 13.65  | 0.0000000       | 0.00 | 0.0007321       | 13.34 | 0.0000188        | 38.65 | 0.0224328        | 44.10  | 0.060617        | 13.34 | 0.0000671        | 37.44 | 0.09504         | 108.63 | 0.741984        | 13.65  | 0.0000000       | 0.00 | 0.0000368       | 16.47 |
| 21F16238           | 24.0 % | ✓ | 0.0083098       | 4.15   | 0.0000000       | 0.00 | 0.0002444        | 4.36  | 0.0000042        | 27.83  | 0.90400          | 4.36  | 0.0015664       | 4.16   | 0.0000000       | 0.00 | 0.0034348       | 2.91  | 0.0001627        | 10.57 | 0.0342735        | 27.85  | 0.284409        | 2.91  | 0.0005808        | 4.46  | 1.18587         | 8.91   | 2.480982        | 4.16   | 0.0000000       | 0.00 | 0.0001726       | 10.08 |
| 21F16239           | 24.0 % | ✓ | 0.0001872       | 170.70 | 0.0000000       | 0.00 | 0.0008524        | 1.24  | 0.0000000        | 0.00   | 3.15347          | 1.23  | 0.0000353       | 170.70 | 0.0000000       | 0.00 | 0.0166452       | 0.62  | 0.0005676        | 9.71  | 0.0000000        | 0.00   | 1.378252        | 0.62  | 0.0020261        | 1.53  |                 |        |                 |        |                 |      |                 |       |

| Additional Parameters |        |   | 40Ar/39Ar | 1σ       | 37Ar/39Ar | 1σ       | 36Ar/39Ar | 1σ       | Time (days) | 37Ar (decay) | 39Ar (decay) | 40Ar (moles) |
|-----------------------|--------|---|-----------|----------|-----------|----------|-----------|----------|-------------|--------------|--------------|--------------|
| 21F16196              | 24.0 % | ✓ | 4.730227  | 0.036929 | 2.279510  | 0.034421 | 0.000059  | 0.000239 | 75.935      | 4.492208     | 1.00053683   | 2.210E-13    |
| 21F16197              | 24.0 % | ✓ | 4.809351  | 0.041348 | 2.667596  | 0.040333 | 0.000951  | 0.000294 | 75.942      | 4.492763     | 1.00053687   | 1.961E-13    |
| 21F16199              | 24.0 % | ✓ | 4.579229  | 0.033996 | 2.937389  | 0.034632 | 0.000287  | 0.000227 | 75.953      | 4.493810     | 1.00053695   | 2.287E-13    |
| 21F16200              | 24.0 % | ✓ | 4.959141  | 0.020132 | 1.457101  | 0.016292 | 0.000522  | 0.000137 | 75.960      | 4.494365     | 1.00053700   | 4.624E-13    |
| 21F16202              | 24.0 % | ✓ | 4.847997  | 0.016248 | 2.573081  | 0.016028 | 0.000778  | 0.000112 | 75.972      | 4.495413     | 1.00053708   | 5.164E-13    |
| 21F16203              | 24.0 % | ✓ | 7.066751  | 0.088813 | 4.457036  | 0.073883 | 0.007869  | 0.000478 | 75.978      | 4.495968     | 1.00053713   | 1.889E-13    |
| 21F16205              | 24.0 % | ✓ | 7.655265  | 0.228622 | 2.059827  | 0.140885 | 0.008219  | 0.001091 | 75.990      | 4.497017     | 1.00053721   | 9.045E-14    |
| 21F16206              | 24.0 % | ✓ | 4.733672  | 0.031803 | 2.082187  | 0.027711 | 0.000094  | 0.000218 | 75.995      | 4.497510     | 1.00053725   | 2.682E-13    |
| 21F16208              | 24.0 % | ✓ | 5.113302  | 0.026736 | 4.478230  | 0.031681 | 0.002411  | 0.000172 | 76.008      | 4.498621     | 1.00053734   | 3.542E-13    |
| 21F16209              | 24.0 % | ✓ | 4.868524  | 0.012389 | 2.525777  | 0.012703 | 0.000975  | 0.000074 | 76.013      | 4.499115     | 1.00053738   | 7.171E-13    |
| 21F16211              | 24.0 % | ✓ | 5.138224  | 0.008741 | 2.125288  | 0.009003 | 0.000907  | 0.000052 | 76.026      | 4.500225     | 1.00053746   | 1.148E-12    |
| 21F16212              | 24.0 % | ✓ | 4.913076  | 0.010731 | 1.699939  | 0.009839 | 0.000719  | 0.000074 | 76.031      | 4.500719     | 1.00053750   | 8.441E-13    |
| 21F16214              | 24.0 % | ✓ | 4.922248  | 0.009715 | 2.224056  | 0.009649 | 0.000700  | 0.000064 | 76.044      | 4.501831     | 1.00053759   | 9.611E-13    |
| 21F16215              | 24.0 % | ✓ | 5.283299  | 0.019740 | 3.151613  | 0.018751 | 0.002022  | 0.000116 | 76.049      | 4.502325     | 1.00053763   | 5.392E-13    |
| 21F16217              | 24.0 % | ✓ | 4.585149  | 0.099903 | 4.521603  | 0.127811 | 0.000761  | 0.000739 | 76.061      | 4.503375     | 1.00053771   | 7.362E-14    |
| 21F16218              | 24.0 % | ✓ | 5.539471  | 0.155817 | 3.017001  | 0.135916 | 0.001513  | 0.000939 | 76.067      | 4.503931     | 1.00053776   | 6.895E-14    |
| 21F16220              | 24.0 % | ✓ | 2.935094  | 0.258017 | 1.795652  | 0.299355 | 0.000631  | 0.002279 | 76.079      | 4.504981     | 1.00053784   | 1.363E-14    |
| 21F16221              | 24.0 % | ✓ | 5.175721  | 0.079150 | 1.991800  | 0.066856 | 0.003146  | 0.000461 | 76.085      | 4.505537     | 1.00053789   | 1.233E-13    |
| 21F16223              | 24.0 % | ✓ | 19.495374 | 1.190776 | 2.257416  | 0.321356 | 0.045372  | 0.003615 | 76.097      | 4.506588     | 1.00053797   | 1.005E-13    |
| 21F16224              | 24.0 % | ✓ | 6.789729  | 0.052243 | 3.301019  | 0.039294 | 0.007866  | 0.000273 | 76.103      | 4.507144     | 1.00053801   | 3.196E-13    |
| 21F16226              | 24.0 % | ✓ | 5.627130  | 0.024927 | 2.352980  | 0.020736 | 0.002084  | 0.000147 | 76.115      | 4.508195     | 1.00053810   | 4.571E-13    |
| 21F16227              | 24.0 % | ✓ | 5.158956  | 0.024985 | 1.982615  | 0.021829 | 0.001003  | 0.000166 | 76.122      | 4.508752     | 1.00053814   | 3.815E-13    |
| 21F16229              | 24.0 % | ✓ | 5.082352  | 0.016688 | 2.389264  | 0.014872 | 0.001612  | 0.000112 | 76.133      | 4.509804     | 1.00053822   | 5.516E-13    |
| 21F16230              | 24.0 % | ✓ | 5.227267  | 0.051455 | 2.014670  | 0.045144 | 0.002855  | 0.000331 | 76.140      | 4.510360     | 1.00053827   | 1.849E-13    |
| 21F16232              | 24.0 % | ✓ | 5.064425  | 0.008841 | 3.000328  | 0.010754 | 0.000877  | 0.000053 | 76.151      | 4.511412     | 1.00053835   | 1.056E-12    |
| 21F16233              | 24.0 % | ✓ | 13.698878 | 0.062467 | 2.942266  | 0.025632 | 0.030278  | 0.000295 | 76.158      | 4.511969     | 1.00053840   | 9.299E-13    |
| 21F16235              | 24.0 % | ✓ | 33.431337 | 2.767961 | 1.633692  | 0.450116 | 0.094124  | 0.008591 | 76.169      | 4.513021     | 1.00053848   | 1.143E-13    |
| 21F16236              | 24.0 % | ✓ | 13.793753 | 1.868066 | 1.721698  | 0.684109 | 0.041464  | 0.007858 | 76.176      | 4.513579     | 1.00053852   | 2.963E-14    |
| 21F16238              | 24.0 % | ✓ | 12.867241 | 0.382584 | 3.172050  | 0.166213 | 0.030031  | 0.001493 | 76.188      | 4.514631     | 1.00053861   | 1.298E-13    |
| 21F16239              | 24.0 % | ✓ | 4.831139  | 0.034184 | 2.284660  | 0.031361 | 0.000753  | 0.000231 | 76.194      | 4.515188     | 1.00053865   | 2.361E-13    |
| 21F16240              | 24.0 % | ✓ | 7.861596  | 0.181186 | 2.383209  | 0.115028 | 0.013036  | 0.000907 | 76.199      | 4.515684     | 1.00053869   | 1.071E-13    |



| Procedure<br>Blanks |        | 36Ar ± 1σ (SE)<br>[fA] | 37Ar ± 1σ (SE)<br>[fA] | 38Ar ± 1σ (SE)<br>[fA] | 39Ar ± 1σ (SE)<br>[fA] | 40Ar ± 1σ (SE)<br>[fA] |
|---------------------|--------|------------------------|------------------------|------------------------|------------------------|------------------------|
| 21F16196            | 24.0 % | 0.0139332 ± 0.0002087  | 0.0053940 ± 0.0056652  | 0.0014530 ± 0.0074761  | 0.0149131 ± 0.0062550  | 3.4950640 ± 0.0141416  |
| 21F16197            | 24.0 % | 0.0139332 ± 0.0002087  | 0.0053940 ± 0.0056652  | 0.0014530 ± 0.0074761  | 0.0149131 ± 0.0062550  | 3.4950640 ± 0.0141416  |
| 21F16199            | 24.0 % | 0.0142314 ± 0.0001998  | 0.0087335 ± 0.0060126  | 0.0124766 ± 0.0069185  | 0.0140220 ± 0.0062401  | 3.5112436 ± 0.0163886  |
| 21F16200            | 24.0 % | 0.0142314 ± 0.0001998  | 0.0087335 ± 0.0060126  | 0.0124766 ± 0.0069185  | 0.0140220 ± 0.0062401  | 3.5112436 ± 0.0163886  |
| 21F16202            | 24.0 % | 0.0125617 ± 0.0002230  | 0.0055997 ± 0.0057946  | 0.0085047 ± 0.0059513  | 0.0020052 ± 0.0057537  | 3.0871593 ± 0.0150623  |
| 21F16203            | 24.0 % | 0.0125617 ± 0.0002230  | 0.0055997 ± 0.0057946  | 0.0085047 ± 0.0059513  | 0.0020052 ± 0.0057537  | 3.0871593 ± 0.0150623  |
| 21F16205            | 24.0 % | 0.0140812 ± 0.0002483  | 0.0080332 ± 0.0062634  | 0.0124033 ± 0.0058820  | 0.0128097 ± 0.0071638  | 3.4266825 ± 0.0167527  |
| 21F16206            | 24.0 % | 0.0140812 ± 0.0002483  | 0.0080332 ± 0.0062634  | 0.0124033 ± 0.0058820  | 0.0128097 ± 0.0071638  | 3.4266825 ± 0.0167527  |
| 21F16208            | 24.0 % | 0.0117928 ± 0.0001996  | 0.0160674 ± 0.0055730  | 0.0030610 ± 0.0064820  | 0.0040664 ± 0.0064094  | 3.0099278 ± 0.0154140  |
| 21F16209            | 24.0 % | 0.0117928 ± 0.0001996  | 0.0160674 ± 0.0055730  | 0.0030610 ± 0.0064820  | 0.0040664 ± 0.0064094  | 3.0099278 ± 0.0154140  |
| 21F16211            | 24.0 % | 0.0127633 ± 0.0002166  | 0.0117740 ± 0.0062619  | 0.0160563 ± 0.0068650  | 0.0053785 ± 0.0063492  | 3.0223031 ± 0.0151756  |
| 21F16212            | 24.0 % | 0.0127633 ± 0.0002166  | 0.0117740 ± 0.0062619  | 0.0160563 ± 0.0068650  | 0.0053785 ± 0.0063492  | 3.0223031 ± 0.0151756  |
| 21F16214            | 24.0 % | 0.0129137 ± 0.0002094  | 0.0047145 ± 0.0060148  | 0.0046078 ± 0.0064349  | 0.0099525 ± 0.0063005  | 3.0961287 ± 0.0160227  |
| 21F16215            | 24.0 % | 0.0129137 ± 0.0002094  | 0.0047145 ± 0.0060148  | 0.0046078 ± 0.0064349  | 0.0099525 ± 0.0063005  | 3.0961287 ± 0.0160227  |
| 21F16217            | 24.0 % | 0.0132993 ± 0.0002133  | 0.0125132 ± 0.0062408  | 0.0201319 ± 0.0065026  | 0.0216858 ± 0.0061142  | 3.2729559 ± 0.0154243  |
| 21F16218            | 24.0 % | 0.0132993 ± 0.0002133  | 0.0125132 ± 0.0062408  | 0.0201319 ± 0.0065026  | 0.0216858 ± 0.0061142  | 3.2729559 ± 0.0154243  |
| 21F16220            | 24.0 % | 0.0125515 ± 0.0001996  | 0.0219586 ± 0.0060500  | 0.0127218 ± 0.0063769  | 0.0117605 ± 0.0063736  | 3.2174346 ± 0.0163153  |
| 21F16221            | 24.0 % | 0.0125515 ± 0.0001996  | 0.0219586 ± 0.0060500  | 0.0127218 ± 0.0063769  | 0.0117605 ± 0.0063736  | 3.2174346 ± 0.0163153  |
| 21F16223            | 24.0 % | 0.0129682 ± 0.0002091  | 0.0101892 ± 0.0065307  | 0.0152272 ± 0.0060822  | 0.0100827 ± 0.0062997  | 2.9879397 ± 0.0149203  |
| 21F16224            | 24.0 % | 0.0129682 ± 0.0002091  | 0.0101892 ± 0.0065307  | 0.0152272 ± 0.0060822  | 0.0100827 ± 0.0062997  | 2.9879397 ± 0.0149203  |
| 21F16226            | 24.0 % | 0.0127009 ± 0.0002286  | 0.0085172 ± 0.0062291  | 0.0057053 ± 0.0058899  | 0.0129901 ± 0.0062676  | 3.0512978 ± 0.0142797  |
| 21F16227            | 24.0 % | 0.0127009 ± 0.0002286  | 0.0085172 ± 0.0062291  | 0.0057053 ± 0.0058899  | 0.0129901 ± 0.0062676  | 3.0512978 ± 0.0142797  |
| 21F16229            | 24.0 % | 0.0121539 ± 0.0002118  | 0.0032294 ± 0.0056261  | 0.0003475 ± 0.0061207  | 0.0133537 ± 0.0062555  | 2.9874287 ± 0.0148420  |
| 21F16230            | 24.0 % | 0.0121539 ± 0.0002118  | 0.0032294 ± 0.0056261  | 0.0003475 ± 0.0061207  | 0.0133537 ± 0.0062555  | 2.9874287 ± 0.0148420  |
| 21F16232            | 24.0 % | 0.0127153 ± 0.0002115  | 0.0218959 ± 0.0060628  | 0.0237705 ± 0.0066888  | 0.0263115 ± 0.0062714  | 3.1030361 ± 0.0156214  |
| 21F16233            | 24.0 % | 0.0127153 ± 0.0002115  | 0.0218959 ± 0.0060628  | 0.0237705 ± 0.0066888  | 0.0263115 ± 0.0062714  | 3.1030361 ± 0.0156214  |
| 21F16235            | 24.0 % | 0.0124172 ± 0.0002284  | 0.0168379 ± 0.0067470  | 0.0032039 ± 0.0070104  | 0.0191522 ± 0.0052939  | 2.9317715 ± 0.0131527  |
| 21F16236            | 24.0 % | 0.0124172 ± 0.0002284  | 0.0168379 ± 0.0067470  | 0.0032039 ± 0.0070104  | 0.0191522 ± 0.0052939  | 2.9317715 ± 0.0131527  |
| 21F16238            | 24.0 % | 0.0120816 ± 0.0001917  | 0.0003331 ± 0.0063422  | 0.0023645 ± 0.0064537  | 0.0067529 ± 0.0057880  | 3.0869594 ± 0.0170794  |
| 21F16239            | 24.0 % | 0.0120816 ± 0.0001917  | 0.0003331 ± 0.0063422  | 0.0023645 ± 0.0064537  | 0.0067529 ± 0.0057880  | 3.0869594 ± 0.0170794  |
| 21F16240            | 24.0 % | 0.0120816 ± 0.0001917  | 0.0003331 ± 0.0063422  | 0.0023645 ± 0.0064537  | 0.0067529 ± 0.0057880  | 3.0869594 ± 0.0170794  |

| Intercept Values |        | 36Ar ± 1σ (SE)<br>[fA] | r2     | Regression<br>(type,n) | 37Ar ± 1σ (SE)<br>[fA] | r2     | Regression<br>(type,n) | 38Ar ± 1σ (SE)<br>[fA] | r2     | Regression<br>(type,n) | 39Ar ± 1σ (SE)<br>[fA] | r2     | Regression<br>(type,n) | 40Ar ± 1σ (SE)<br>[fA] | r2     | Regression<br>(type,n) |
|------------------|--------|------------------------|--------|------------------------|------------------------|--------|------------------------|------------------------|--------|------------------------|------------------------|--------|------------------------|------------------------|--------|------------------------|
| 21F16196         | 24.0 % | 0.0140074 ± 0.0002121  | 0.8926 | EXP 150 of 150         | 0.6721146 ± 0.0066724  | 0.4598 | EXP 150 of 150         | 0.0299694 ± 0.0064736  | 0.0049 | EXP 150 of 150         | 1.3320408 ± 0.0068245  | 0.7653 | EXP 150 of 150         | 9.7380224 ± 0.0156138  | 0.9935 | EXP 150 of 150         |
| 21F16197         | 24.0 % | 0.0149680 ± 0.0002426  | 0.8499 | EXP 150 of 150         | 0.6863562 ± 0.0066117  | 0.5319 | EXP 150 of 150         | 0.0100887 ± 0.0066557  | 0.0024 | EXP 150 of 150         | 1.1646066 ± 0.0062182  | 0.7409 | EXP 150 of 150         | 9.0355661 ± 0.0160433  | 0.9936 | EXP 150 of 150         |
| 21F16199         | 24.0 % | 0.0138496 ± 0.0002264  | 0.8782 | EXP 150 of 150         | 0.9266561 ± 0.0063136  | 0.6804 | EXP 150 of 150         | 0.0105303 ± 0.0064385  | 0.0059 | EXP 150 of 150         | 1.4217703 ± 0.0067329  | 0.7907 | EXP 150 of 150         | 9.9707298 ± 0.0158088  | 0.9928 | EXP 150 of 150         |
| 21F16200         | 24.0 % | 0.0155298 ± 0.0002752  | 0.8121 | EXP 150 of 150         | 0.8588033 ± 0.0063193  | 0.6691 | EXP 150 of 150         | 0.0556872 ± 0.0062494  | 0.0384 | EXP 149 of 150         | 2.6424664 ± 0.0073512  | 0.9349 | EXP 150 of 150         | 16.5725292 ± 0.0148019 | 0.9852 | EXP 149 of 150         |
| 21F16202         | 24.0 % | 0.0147738 ± 0.0002260  | 0.8841 | EXP 150 of 150         | 1.7201606 ± 0.0059903  | 0.8944 | EXP 148 of 150         | 0.0519612 ± 0.0071228  | 0.0364 | EXP 148 of 150         | 3.0048625 ± 0.0068730  | 0.9533 | EXP 150 of 150         | 17.6745533 ± 0.0152464 | 0.9828 | EXP 150 of 150         |
| 21F16203         | 24.0 % | 0.0181744 ± 0.0002490  | 0.8288 | EXP 150 of 150         | 0.7506364 ± 0.0061829  | 0.5414 | EXP 149 of 150         | 0.0112710 ± 0.0070801  | 0.0089 | EXP 150 of 150         | 0.7553962 ± 0.0067738  | 0.4250 | EXP 150 of 150         | 8.4219930 ± 0.0174085  | 0.9927 | EXP 150 of 150         |
| 21F16205         | 24.0 % | 0.0166729 ± 0.0002267  | 0.8556 | EXP 150 of 150         | 0.1602344 ± 0.0071042  | 0.0073 | EXP 150 of 150         | 0.0030143 ± 0.0066604  | 0.0475 | EXP 150 of 150         | 0.3459118 ± 0.0061158  | 0.0005 | EXP 149 of 150         | 5.9818439 ± 0.0179101  | 0.9940 | EXP 150 of 150         |
| 21F16206         | 24.0 % | 0.0142235 ± 0.0002159  | 0.8812 | EXP 148 of 150         | 0.7456501 ± 0.0058811  | 0.6121 | EXP 150 of 150         | 0.0279487 ± 0.0066671  | 0.0022 | EXP 149 of 150         | 1.6099711 ± 0.0061971  | 0.8695 | EXP 150 of 150         | 11.0024691 ± 0.0167887 | 0.9918 | EXP 150 of 150         |
| 21F16208         | 24.0 % | 0.0162502 ± 0.0002473  | 0.8608 | EXP 146 of 150         | 1.9552910 ± 0.0071674  | 0.8839 | EXP 150 of 150         | 0.0354884 ± 0.0061535  | 0.0107 | EXP 150 of 150         | 1.9569054 ± 0.0065023  | 0.8924 | EXP 149 of 150         | 13.0156560 ± 0.0171678 | 0.9904 | EXP 150 of 150         |
| 21F16209         | 24.0 % | 0.0156243 ± 0.0002114  | 0.8857 | EXP 149 of 150         | 2.3416334 ± 0.0066606  | 0.9209 | EXP 149 of 150         | 0.0482612 ± 0.0061485  | 0.0074 | EXP 149 of 150         | 4.1567245 ± 0.0068173  | 0.9766 | EXP 150 of 150         | 23.2682883 ± 0.0164015 | 0.8999 | EXP 150 of 150         |
| 21F16211         | 24.0 % | 0.0181736 ± 0.0002224  | 0.8688 | EXP 150 of 150         | 2.9787715 ± 0.0066628  | 0.9495 | EXP 150 of 150         | 0.0731623 ± 0.0065936  | 0.0009 | EXP 150 of 150         | 6.3033274 ± 0.0067860  | 0.9902 | EXP 149 of 150         | 35.4482751 ± 0.0187440 | 0.9534 | EXP 150 of 150         |
| 21F16212         | 24.0 % | 0.0160586 ± 0.0002632  | 0.9001 | EXP 150 of 150         | 1.8366571 ± 0.0062581  | 0.8843 | EXP 149 of 150         | 0.0900977 ± 0.0068396  | 0.0723 | EXP 149 of 150         | 4.8487650 ± 0.0068023  | 0.9817 | EXP 150 of 150         | 26.8665410 ± 0.0170431 | 0.9717 | EXP 150 of 150         |
| 21F16214         | 24.0 % | 0.0165597 ± 0.0002615  | 0.8436 | EXP 150 of 150         | 2.7173999 ± 0.0058007  | 0.9537 | EXP 147 of 150         | 0.0849828 ± 0.0073363  | 0.0330 | EXP 150 of 150         | 5.5143311 ± 0.0072798  | 0.9848 | EXP 147 of 150         | 30.2450585 ± 0.0154605 | 0.0261 | EXP 149 of 150         |
| 21F16215         | 24.0 % | 0.0184198 ± 0.0002345  | 0.8433 | EXP 149 of 150         | 2.0136192 ± 0.0059183  | 0.9126 | EXP 150 of 150         | 0.0454801 ± 0.0064966  | 0.0093 | EXP 150 of 150         | 2.8868781 ± 0.0074372  | 0.9390 | EXP 150 of 150         | 18.3266481 ± 0.0167582 | 0.9727 | EXP 150 of 150         |
| 21F16217         | 24.0 % | 0.0136254 ± 0.0002342  | 0.8734 | EXP 148 of 150         | 0.4658805 ± 0.0068971  | 0.2386 | EXP 150 of 150         | 0.0070329 ± 0.0070329  | 0.0287 | EXP 150 of 150         | 0.4743344 ± 0.0062288  | 0.2274 | EXP 150 of 150         | 5.3526314 ± 0.0143718  | 0.9963 | EXP 148 of 150         |
| 21F16218         | 24.0 % | 0.0138018 ± 0.0002271  | 0.8732 | EXP 150 of 150         | 0.2469907 ± 0.0059766  | 0.2004 | EXP 149 of 150         | 0.0156345 ± 0.0059176  | 0.0021 | EXP 149 of 150         | 0.3725852 ± 0.0066721  | 0.0467 | EXP 150 of 150         | 5.2207000 ± 0.0154833  | 0.9957 | EXP 150 of 150         |
| 21F16220         | 24.0 % | 0.0126298 ± 0.0001999  | 0.8949 | EXP 150 of 150         | 0.0740185 ± 0.0052080  | 0.0169 | EXP 147 of 150         | 0.0072985 ± 0.0066947  | 0.0075 | EXP 150 of 150         | 0.1426907 ± 0.0057122  | 0.0098 | EXP 149 of 150         | 3.6025072 ± 0.0156859  | 0.9960 | EXP 150 of 150         |
| 21F16221         | 24.0 % | 0.0145518 ± 0.0002125  | 0.8794 | EXP 150 of 150         | 0.3181329 ± 0.0066715  | 0.1287 | EXP 150 of 150         | 0.0066773 ± 0.0066052  | 0.0116 | EXP 150 of 150         | 0.6833650 ± 0.0069021  | 0.3381 | EXP 150 of 150         | 6.7005303 ± 0.0139668  | 0.9959 | EXP 150 of 150         |
| 21F16223         | 24.0 % | 0.0192083 ± 0.0002453  | 0.8207 | EXP 150 of 150         | 0.0827813 ± 0.0066873  | 0.0130 | EXP 150 of 150         | 0.0174884 ± 0.0062991  | 0.0001 | EXP 148 of 150         | 0.1553578 ± 0.0061612  | 0.0647 | EXP 150 of 150         | 5.8258841 ± 0.0138663  | 0.9963 | EXP 150 of 150         |
| 21F16224         | 24.0 % | 0.0228510 ± 0.0002622  | 0.8377 | EXP 150 of 150         | 0.9798402 ± 0.0059196  | 0.6944 | EXP 149 of 150         | 0.0460717 ± 0.0063566  | 0.0194 | EXP 149 of 150         | 1.3372759 ± 0.0073000  | 0.6593 | EXP 150 of 150         | 12.0175228 ± 0.0169562 | 0.9945 | EXP 150 of 150         |
| 21F16226         | 24.0 % | 0.0172194 ± 0.0002227  | 0.8712 | EXP 150 of 150         | 1.2008858 ± 0.0062830  | 0.7767 | EXP 149 of 150         | 0.0359696 ± 0.0065209  | 0.0000 | EXP 150 of 150         | 2.3031205 ± 0.0068067  | 0.9190 | EXP 150 of 150         | 15.9643313 ± 0.0178599 | 0.9789 | EXP 150 of 150         |
| 21F16227         | 24.0 % | 0.0146797 ± 0.0002358  | 0.8689 | EXP 150 of 150         | 0.9228981 ± 0.0063811  | 0.6364 | EXP 150 of 150         | 0.0412618 ± 0.0065571  | 0.0328 | EXP 148 of 150         | 2.0975306 ± 0.0068474  | 0.8916 | EXP 150 of 150         | 13.8271912 ± 0.0140689 | 0.9924 | EXP 149 of 150         |
| 21F16229         | 24.0 % | 0.0168229 ± 0.0002439  | 0.8621 | EXP 149 of 150         | 1.6201486 ± 0.0055929  | 0.8813 | EXP 148 of 150         | 0.0766775 ± 0.0063409  | 0.1355 | EXP 148 of 150         | 3.0728293 ± 0.0062760  | 0.9623 | EXP 149 of 150         | 18.5683409 ± 0.0179112 | 0.9780 | EXP 150 of 150         |
| 21F16230         | 24.0 % | 0.0148496 ± 0.0002279  | 0.8702 | EXP 150 of 150         | 0.4476531 ± 0.0071329  | 0.1030 | EXP 149 of 150         | 0.0022090 ± 0.0066135  | 0.0098 | EXP 149 of 150         | 1.0107546 ± 0.0061989  | 0.5970 | EXP 149 of 150         | 8.2116980 ± 0.0170890  | 0.9932 | EXP 150 of 150         |
| 21F16232         | 24.0 % | 0.0175946 ± 0.0002026  | 0.8835 | EXP 145 of 150         | 3.9207168 ± 0.0054359  | 0.9792 | EXP 149 of 150         | 0.0681544 ± 0.0064851  | 0.0006 | EXP 150 of 150         | 5.9031273 ± 0.0060452  | 0.9911 | EXP 149 of 150         | 32.9261830 ± 0.0191506 | 0.9038 | EXP 150 of 150         |
| 21F16233         | 24.0 % | 0.0675713 ± 0.0004164  | 0.0122 | EXP 150 of 150         | 1.2667882 ± 0.0063530  | 0.7925 | EXP 150 of 150         | 0.0446317 ± 0.0067743  | 0.0452 | EXP 150 of 150         | 1.9400433 ± 0.0057740  | 0.9205 | EXP 147 of 150         | 29.3722642 ± 0.0173075 | 0.6384 | EXP 150 of 150         |
| 21F16235         | 24.0 % | 0.0210029 ± 0.0002438  | 0.8294 | EXP 149 of 150         | 0.0516313 ± 0.0061739  | 0.0029 | EXP 150 of 150         | 0.0111026 ± 0.0062024  | 0.0005 | EXP 150 of 150         | 0.1155039 ± 0.0059365  | 0.0245 | EXP 149 of 150         | 6.1594804 ± 0.0156061  | 0.9951 | EXP 150 of 150         |
| 21F16236         | 24.0 % | 0.0147945 ± 0.0002245  | 0.8628 | EXP 150 of 150         | 0.0398822 ± 0.0053742  | 0.0019 | EXP 150 of 150         | 0.0203777 ± 0.0069308  | 0.0186 | EXP 149 of 150         | 0.0797131 ± 0.0060938  | 0.0804 | EXP 148 of 150         | 3.7688302 ± 0.0151525  | 0.9962 | EXP 150 of 150         |
| 21F16238         | 24.0 % | 0.0201675 ± 0.0002634  | 0.7960 | EXP 150 of 150         | 0.1990096 ± 0.0059216  | 0.1175 | EXP 150 of 150         | 0.0369552 ± 0.0069760  | 0.0284 | EXP 150 of 150         | 0.2911646 ± 0.0059017  | 0.0036 | EXP 150 of 150         | 6.7539869 ± 0.0153261  | 0.9952 | EXP 149 of 150         |
| 21F16239         | 24.0 % | 0.0130638 ± 0.0002331  | 0.8654 | EXP 150 of 150         | 0.6949570 ± 0.0054317  | 0.5802 | EXP 147 of 150         | 0.0093590 ± 0.0063663  | 0.0001 | EXP 147 of 150         | 1.3842330 ± 0.0061975  | 0.8122 | EXP 150 of 150         | 9.7552758 ± 0.0155578  | 0.9931 | EXP 150 of 150         |
| 21F16240         | 24.0 % | 0.0168234 ± 0.0002478  | 0.8302 | EXP 149 of 150         | 0.2019421 ± 0.0059442  | 0.1206 | EXP 146 of 150         | 0.0176731 ± 0.0066985  | 0.0000 | EXP 150 of 150         | 0.3909631 ± 0.0060709  | 0.0826 | EXP 149 of 150         | 6.1136003 ± 0.0143691  | 0.9957 | EXP 149 of 150         |



| Project Info |        | Analyst     | Irradiation | X-pos | Y-pos | Z/H-pos | Project                | Experiment | Nmb |
|--------------|--------|-------------|-------------|-------|-------|---------|------------------------|------------|-----|
| 21F16196     | 24.0 % | Dan Miggins | 21-OSU-04   | 0.00  | 0.00  | 18.24   | Oregon\Swenton (20-01) | 21F16192   | 01  |
| 21F16197     | 24.0 % | Dan Miggins | 21-OSU-04   | 0.00  | 0.00  | 18.24   | Oregon\Swenton (20-01) | 21F16192   | 01  |
| 21F16199     | 24.0 % | Dan Miggins | 21-OSU-04   | 0.00  | 0.00  | 18.24   | Oregon\Swenton (20-01) | 21F16192   | 01  |
| 21F16200     | 24.0 % | Dan Miggins | 21-OSU-04   | 0.00  | 0.00  | 18.24   | Oregon\Swenton (20-01) | 21F16192   | 01  |
| 21F16202     | 24.0 % | Dan Miggins | 21-OSU-04   | 0.00  | 0.00  | 18.24   | Oregon\Swenton (20-01) | 21F16192   | 01  |
| 21F16203     | 24.0 % | Dan Miggins | 21-OSU-04   | 0.00  | 0.00  | 18.24   | Oregon\Swenton (20-01) | 21F16192   | 01  |
| 21F16205     | 24.0 % | Dan Miggins | 21-OSU-04   | 0.00  | 0.00  | 18.24   | Oregon\Swenton (20-01) | 21F16192   | 01  |
| 21F16206     | 24.0 % | Dan Miggins | 21-OSU-04   | 0.00  | 0.00  | 18.24   | Oregon\Swenton (20-01) | 21F16192   | 01  |
| 21F16208     | 24.0 % | Dan Miggins | 21-OSU-04   | 0.00  | 0.00  | 18.24   | Oregon\Swenton (20-01) | 21F16192   | 01  |
| 21F16209     | 24.0 % | Dan Miggins | 21-OSU-04   | 0.00  | 0.00  | 18.24   | Oregon\Swenton (20-01) | 21F16192   | 01  |
| 21F16211     | 24.0 % | Dan Miggins | 21-OSU-04   | 0.00  | 0.00  | 18.24   | Oregon\Swenton (20-01) | 21F16192   | 01  |
| 21F16212     | 24.0 % | Dan Miggins | 21-OSU-04   | 0.00  | 0.00  | 18.24   | Oregon\Swenton (20-01) | 21F16192   | 01  |
| 21F16214     | 24.0 % | Dan Miggins | 21-OSU-04   | 0.00  | 0.00  | 18.24   | Oregon\Swenton (20-01) | 21F16192   | 01  |
| 21F16215     | 24.0 % | Dan Miggins | 21-OSU-04   | 0.00  | 0.00  | 18.24   | Oregon\Swenton (20-01) | 21F16192   | 01  |
| 21F16217     | 24.0 % | Dan Miggins | 21-OSU-04   | 0.00  | 0.00  | 18.24   | Oregon\Swenton (20-01) | 21F16192   | 01  |
| 21F16218     | 24.0 % | Dan Miggins | 21-OSU-04   | 0.00  | 0.00  | 18.24   | Oregon\Swenton (20-01) | 21F16192   | 01  |
| 21F16220     | 24.0 % | Dan Miggins | 21-OSU-04   | 0.00  | 0.00  | 18.24   | Oregon\Swenton (20-01) | 21F16192   | 01  |
| 21F16221     | 24.0 % | Dan Miggins | 21-OSU-04   | 0.00  | 0.00  | 18.24   | Oregon\Swenton (20-01) | 21F16192   | 01  |
| 21F16223     | 24.0 % | Dan Miggins | 21-OSU-04   | 0.00  | 0.00  | 18.24   | Oregon\Swenton (20-01) | 21F16192   | 01  |
| 21F16224     | 24.0 % | Dan Miggins | 21-OSU-04   | 0.00  | 0.00  | 18.24   | Oregon\Swenton (20-01) | 21F16192   | 01  |
| 21F16226     | 24.0 % | Dan Miggins | 21-OSU-04   | 0.00  | 0.00  | 18.24   | Oregon\Swenton (20-01) | 21F16192   | 01  |
| 21F16227     | 24.0 % | Dan Miggins | 21-OSU-04   | 0.00  | 0.00  | 18.24   | Oregon\Swenton (20-01) | 21F16192   | 01  |
| 21F16229     | 24.0 % | Dan Miggins | 21-OSU-04   | 0.00  | 0.00  | 18.24   | Oregon\Swenton (20-01) | 21F16192   | 01  |
| 21F16230     | 24.0 % | Dan Miggins | 21-OSU-04   | 0.00  | 0.00  | 18.24   | Oregon\Swenton (20-01) | 21F16192   | 01  |
| 21F16232     | 24.0 % | Dan Miggins | 21-OSU-04   | 0.00  | 0.00  | 18.24   | Oregon\Swenton (20-01) | 21F16192   | 01  |
| 21F16233     | 24.0 % | Dan Miggins | 21-OSU-04   | 0.00  | 0.00  | 18.24   | Oregon\Swenton (20-01) | 21F16192   | 01  |
| 21F16235     | 24.0 % | Dan Miggins | 21-OSU-04   | 0.00  | 0.00  | 18.24   | Oregon\Swenton (20-01) | 21F16192   | 01  |
| 21F16236     | 24.0 % | Dan Miggins | 21-OSU-04   | 0.00  | 0.00  | 18.24   | Oregon\Swenton (20-01) | 21F16192   | 01  |
| 21F16238     | 24.0 % | Dan Miggins | 21-OSU-04   | 0.00  | 0.00  | 18.24   | Oregon\Swenton (20-01) | 21F16192   | 01  |
| 21F16239     | 24.0 % | Dan Miggins | 21-OSU-04   | 0.00  | 0.00  | 18.24   | Oregon\Swenton (20-01) | 21F16192   | 01  |
| 21F16240     | 24.0 % | Dan Miggins | 21-OSU-04   | 0.00  | 0.00  | 18.24   | Oregon\Swenton (20-01) | 21F16192   | 01  |

| Sample Parameters |        | Sample    | Material              | Location | Standard Name    | Standard (in Ma) | %1σ   | Standard Reference  | Standard 40Ar/39Ar | %1σ   | J          | %1σ   | Air 40Ar/36Ar | %1σ   | MDF (lin)  | %1σ   | Volume Ratio | Sensitivity (mol/volt) | Day | Month | Year | Hour | Min | Resist |
|-------------------|--------|-----------|-----------------------|----------|------------------|------------------|-------|---------------------|--------------------|-------|------------|-------|---------------|-------|------------|-------|--------------|------------------------|-----|-------|------|------|-----|--------|
| 21F16196          | 24.0 % | VS20-125A | Plagioclase (albite?) | Unknown  | FCT-NM (4X17-21) | 28.201           | 0.082 | Kuiper et al (2008) | 9.44728            | 0.112 | 0.00164338 | 0.112 | 300.351       | 0.125 | 0.99850732 | 0.041 | 1            | 3.54E-14               | 31  | AUG   | 2021 | 13   | 58  | 1      |
| 21F16197          | 24.0 % | VS20-125A | Plagioclase (albite?) | Unknown  | FCT-NM (4X17-21) | 28.201           | 0.082 | Kuiper et al (2008) | 9.44728            | 0.112 | 0.00164338 | 0.112 | 300.351       | 0.125 | 0.99850732 | 0.041 | 1            | 3.54E-14               | 31  | AUG   | 2021 | 14   | 7   | 1      |
| 21F16199          | 24.0 % | VS20-125A | Plagioclase (albite?) | Unknown  | FCT-NM (4X17-21) | 28.201           | 0.082 | Kuiper et al (2008) | 9.44728            | 0.112 | 0.00164338 | 0.112 | 300.351       | 0.125 | 0.99850732 | 0.041 | 1            | 3.54E-14               | 31  | AUG   | 2021 | 14   | 24  | 1      |
| 21F16200          | 24.0 % | VS20-125A | Plagioclase (albite?) | Unknown  | FCT-NM (4X17-21) | 28.201           | 0.082 | Kuiper et al (2008) | 9.44728            | 0.112 | 0.00164338 | 0.112 | 300.351       | 0.125 | 0.99850732 | 0.041 | 1            | 3.54E-14               | 31  | AUG   | 2021 | 14   | 33  | 1      |
| 21F16202          | 24.0 % | VS20-125A | Plagioclase (albite?) | Unknown  | FCT-NM (4X17-21) | 28.201           | 0.082 | Kuiper et al (2008) | 9.44728            | 0.112 | 0.00164338 | 0.112 | 300.351       | 0.125 | 0.99850732 | 0.041 | 1            | 3.54E-14               | 31  | AUG   | 2021 | 14   | 50  | 1      |
| 21F16203          | 24.0 % | VS20-125A | Plagioclase (albite?) | Unknown  | FCT-NM (4X17-21) | 28.201           | 0.082 | Kuiper et al (2008) | 9.44728            | 0.112 | 0.00164338 | 0.112 | 300.351       | 0.125 | 0.99850732 | 0.041 | 1            | 3.54E-14               | 31  | AUG   | 2021 | 14   | 59  | 1      |
| 21F16205          | 24.0 % | VS20-125A | Plagioclase (albite?) | Unknown  | FCT-NM (4X17-21) | 28.201           | 0.082 | Kuiper et al (2008) | 9.44728            | 0.112 | 0.00164338 | 0.112 | 300.351       | 0.125 | 0.99850732 | 0.041 | 1            | 3.54E-14               | 31  | AUG   | 2021 | 15   | 16  | 1      |
| 21F16206          | 24.0 % | VS20-125A | Plagioclase (albite?) | Unknown  | FCT-NM (4X17-21) | 28.201           | 0.082 | Kuiper et al (2008) | 9.44728            | 0.112 | 0.00164338 | 0.112 | 300.351       | 0.125 | 0.99850732 | 0.041 | 1            | 3.54E-14               | 31  | AUG   | 2021 | 15   | 24  | 1      |
| 21F16208          | 24.0 % | VS20-125A | Plagioclase (albite?) | Unknown  | FCT-NM (4X17-21) | 28.201           | 0.082 | Kuiper et al (2008) | 9.44728            | 0.112 | 0.00164338 | 0.112 | 300.351       | 0.125 | 0.99850732 | 0.041 | 1            | 3.54E-14               | 31  | AUG   | 2021 | 15   | 42  | 1      |
| 21F16209          | 24.0 % | VS20-125A | Plagioclase (albite?) | Unknown  | FCT-NM (4X17-21) | 28.201           | 0.082 | Kuiper et al (2008) | 9.44728            | 0.112 | 0.00164338 | 0.112 | 300.351       | 0.125 | 0.99850732 | 0.041 | 1            | 3.54E-14               | 31  | AUG   | 2021 | 15   | 50  | 1      |
| 21F16211          | 24.0 % | VS20-125A | Plagioclase (albite?) | Unknown  | FCT-NM (4X17-21) | 28.201           | 0.082 | Kuiper et al (2008) | 9.44728            | 0.112 | 0.00164338 | 0.112 | 300.351       | 0.125 | 0.99850732 | 0.041 | 1            | 3.54E-14               | 31  | AUG   | 2021 | 16   | 8   | 1      |
| 21F16212          | 24.0 % | VS20-125A | Plagioclase (albite?) | Unknown  | FCT-NM (4X17-21) | 28.201           | 0.082 | Kuiper et al (2008) | 9.44728            | 0.112 | 0.00164338 | 0.112 | 300.351       | 0.125 | 0.99850732 | 0.041 | 1            | 3.54E-14               | 31  | AUG   | 2021 | 16   | 16  | 1      |
| 21F16214          | 24.0 % | VS20-125A | Plagioclase (albite?) | Unknown  | FCT-NM (4X17-21) | 28.201           | 0.082 | Kuiper et al (2008) | 9.44728            | 0.112 | 0.00164338 | 0.112 | 300.351       | 0.125 | 0.99850732 | 0.041 | 1            | 3.54E-14               | 31  | AUG   | 2021 | 16   | 34  | 1      |
| 21F16215          | 24.0 % | VS20-125A | Plagioclase (albite?) | Unknown  | FCT-NM (4X17-21) | 28.201           | 0.082 | Kuiper et al (2008) | 9.44728            | 0.112 | 0.00164338 | 0.112 | 300.351       | 0.125 | 0.99850732 | 0.041 | 1            | 3.54E-14               | 31  | AUG   | 2021 | 16   | 42  | 1      |
| 21F16217          | 24.0 % | VS20-125A | Plagioclase (albite?) | Unknown  | FCT-NM (4X17-21) | 28.201           | 0.082 | Kuiper et al (2008) | 9.44728            | 0.112 | 0.00164338 | 0.112 | 300.351       | 0.125 | 0.99850732 | 0.041 | 1            | 3.54E-14               | 31  | AUG   | 2021 | 16   | 59  | 1      |
| 21F16218          | 24.0 % | VS20-125A | Plagioclase (albite?) | Unknown  | FCT-NM (4X17-21) | 28.201           | 0.082 | Kuiper et al (2008) | 9.44728            | 0.112 | 0.00164338 | 0.112 | 300.351       | 0.125 | 0.99850732 | 0.041 | 1            | 3.54E-14               | 31  | AUG   | 2021 | 17   | 8   | 1      |
| 21F16220          | 24.0 % | VS20-125A | Plagioclase (albite?) | Unknown  | FCT-NM (4X17-21) | 28.201           | 0.082 | Kuiper et al (2008) | 9.44728            | 0.112 | 0.00164338 | 0.112 | 300.351       | 0.125 | 0.99850732 | 0.041 | 1            | 3.54E-14               | 31  | AUG   | 2021 | 17   | 25  | 1      |
| 21F16221          | 24.0 % | VS20-125A | Plagioclase (albite?) | Unknown  | FCT-NM (4X17-21) | 28.201           | 0.082 | Kuiper et al (2008) | 9.44728            | 0.112 | 0.00164338 | 0.112 | 300.351       | 0.125 | 0.99850732 | 0.041 | 1            | 3.54E-14               | 31  | AUG   | 2021 | 17   | 34  | 1      |
| 21F16223          | 24.0 % | VS20-125A | Plagioclase (albite?) | Unknown  | FCT-NM (4X17-21) | 28.201           | 0.082 | Kuiper et al (2008) | 9.44728            | 0.112 | 0.00164338 | 0.112 | 300.351       | 0.125 | 0.99850732 | 0.041 | 1            | 3.54E-14               | 31  | AUG   | 2021 | 17   | 51  | 1      |
| 21F16224          | 24.0 % | VS20-125A | Plagioclase (albite?) | Unknown  | FCT-NM (4X17-21) | 28.201           | 0.082 | Kuiper et al (2008) | 9.44728            | 0.112 | 0.00164338 | 0.112 | 300.351       | 0.125 | 0.99850732 | 0.041 | 1            | 3.54E-14               | 31  | AUG   | 2021 | 18   | 0   | 1      |
| 21F16226          | 24.0 % | VS20-125A | Plagioclase (albite?) | Unknown  | FCT-NM (4X17-21) | 28.201           | 0.082 | Kuiper et al (2008) | 9.44728            | 0.112 | 0.00164338 | 0.112 | 300.351       | 0.125 | 0.99850732 | 0.041 | 1            | 3.54E-14               | 31  | AUG   | 2021 | 18   | 17  | 1      |
| 21F16227          | 24.0 % | VS20-125A | Plagioclase (albite?) | Unknown  | FCT-NM (4X17-21) | 28.201           | 0.082 | Kuiper et al (2008) | 9.44728            | 0.112 | 0.00164338 | 0.112 | 300.351       | 0.125 | 0.99850732 | 0.041 | 1            | 3.54E-14               | 31  | AUG   | 2021 | 18   | 26  | 1      |
| 21F16229          | 24.0 % | VS20-125A | Plagioclase (albite?) | Unknown  | FCT-NM (4X17-21) | 28.201           | 0.082 | Kuiper et al (2008) | 9.44728            | 0.112 | 0.00164338 | 0.112 | 300.351       | 0.125 | 0.99850732 | 0.041 | 1            | 3.54E-14               | 31  | AUG   | 2021 | 18   | 43  | 1      |
| 21F16230          | 24.0 % | VS20-125A | Plagioclase (albite?) | Unknown  | FCT-NM (4X17-21) | 28.201           | 0.082 | Kuiper et al (2008) | 9.44728            | 0.112 | 0.00164338 | 0.112 | 300.351       | 0.125 | 0.99850732 | 0.041 | 1            | 3.54E-14               | 31  | AUG   | 2021 | 18   | 52  | 1      |
| 21F16232          | 24.0 % | VS20-125A | Plagioclase (albite?) | Unknown  | FCT-NM (4X17-21) | 28.201           | 0.082 | Kuiper et al (2008) | 9.44728            | 0.112 | 0.00164338 | 0.112 | 300.351       | 0.125 | 0.99850732 | 0.041 | 1            | 3.54E-14               | 31  | AUG   | 2021 | 19   | 9   | 1      |
| 21F16233          | 24.0 % | VS20-125A | Plagioclase (albite?) | Unknown  | FCT-NM (4X17-21) | 28.201           | 0.082 | Kuiper et al (2008) | 9.44728            | 0.112 | 0.00164338 | 0.112 | 300.351       | 0.125 | 0.99850732 | 0.041 | 1            | 3.54E-14               | 31  | AUG   | 2021 | 19   | 18  | 1      |
| 21F16235          | 24.0 % | VS20-125A | Plagioclase (albite?) | Unknown  | FCT-NM (4X17-21) | 28.201           | 0.082 | Kuiper et al (2008) | 9.44728            | 0.112 | 0.00164338 | 0.112 | 300.351       | 0.125 | 0.99850732 | 0.041 | 1            | 3.54E-14               | 31  | AUG   | 2021 | 19   | 35  | 1      |
| 21F16236          | 24.0 % | VS20-125A | Plagioclase (albite?) | Unknown  | FCT-NM (4X17-21) | 28.201           | 0.082 | Kuiper et al (2008) | 9.44728            | 0.112 | 0.00164338 | 0.112 | 300.351       | 0.125 | 0.99850732 | 0.041 | 1            | 3.54E-14               | 31  | AUG   | 2021 | 19   | 44  | 1      |
| 21F16238          | 24.0 % | VS20-125A | Plagioclase (albite?) | Unknown  | FCT-NM (4X17-21) | 28.201           | 0.082 | Kuiper et al (2008) | 9.44728            | 0.112 | 0.00164338 | 0.112 | 300.351       | 0.125 | 0.99850732 | 0.041 | 1            | 3.54E-14               | 31  | AUG   | 2021 | 20   | 1   | 1      |
| 21F16239          | 24.0 % | VS20-125A | Plagioclase (albite?) | Unknown  | FCT-NM (4X17-21) | 28.201           | 0.082 | Kuiper et al (2008) | 9.44728            | 0.112 | 0.00164338 | 0.112 | 300.351       | 0.125 | 0.99850732 | 0.041 | 1            | 3.54E-14               | 31  | AUG   | 2021 | 20   | 10  | 1      |
| 21F16240          | 24.0 % | VS20-125A | Plagioclase (albite?) | Unknown  | FCT-NM (4X17-21) | 28.201           | 0.082 | Kuiper et al (2008) | 9.44728            | 0.112 | 0.00164338 | 0.112 | 300.351       | 0.125 | 0.99850732 | 0.041 | 1            | 3.54E-14               | 31  | AUG   | 2021 | 20   | 18  | 1      |



21F16192.AGE >>> VS20-125A >>> OREGON | SWENTON (20-01) PROJECT

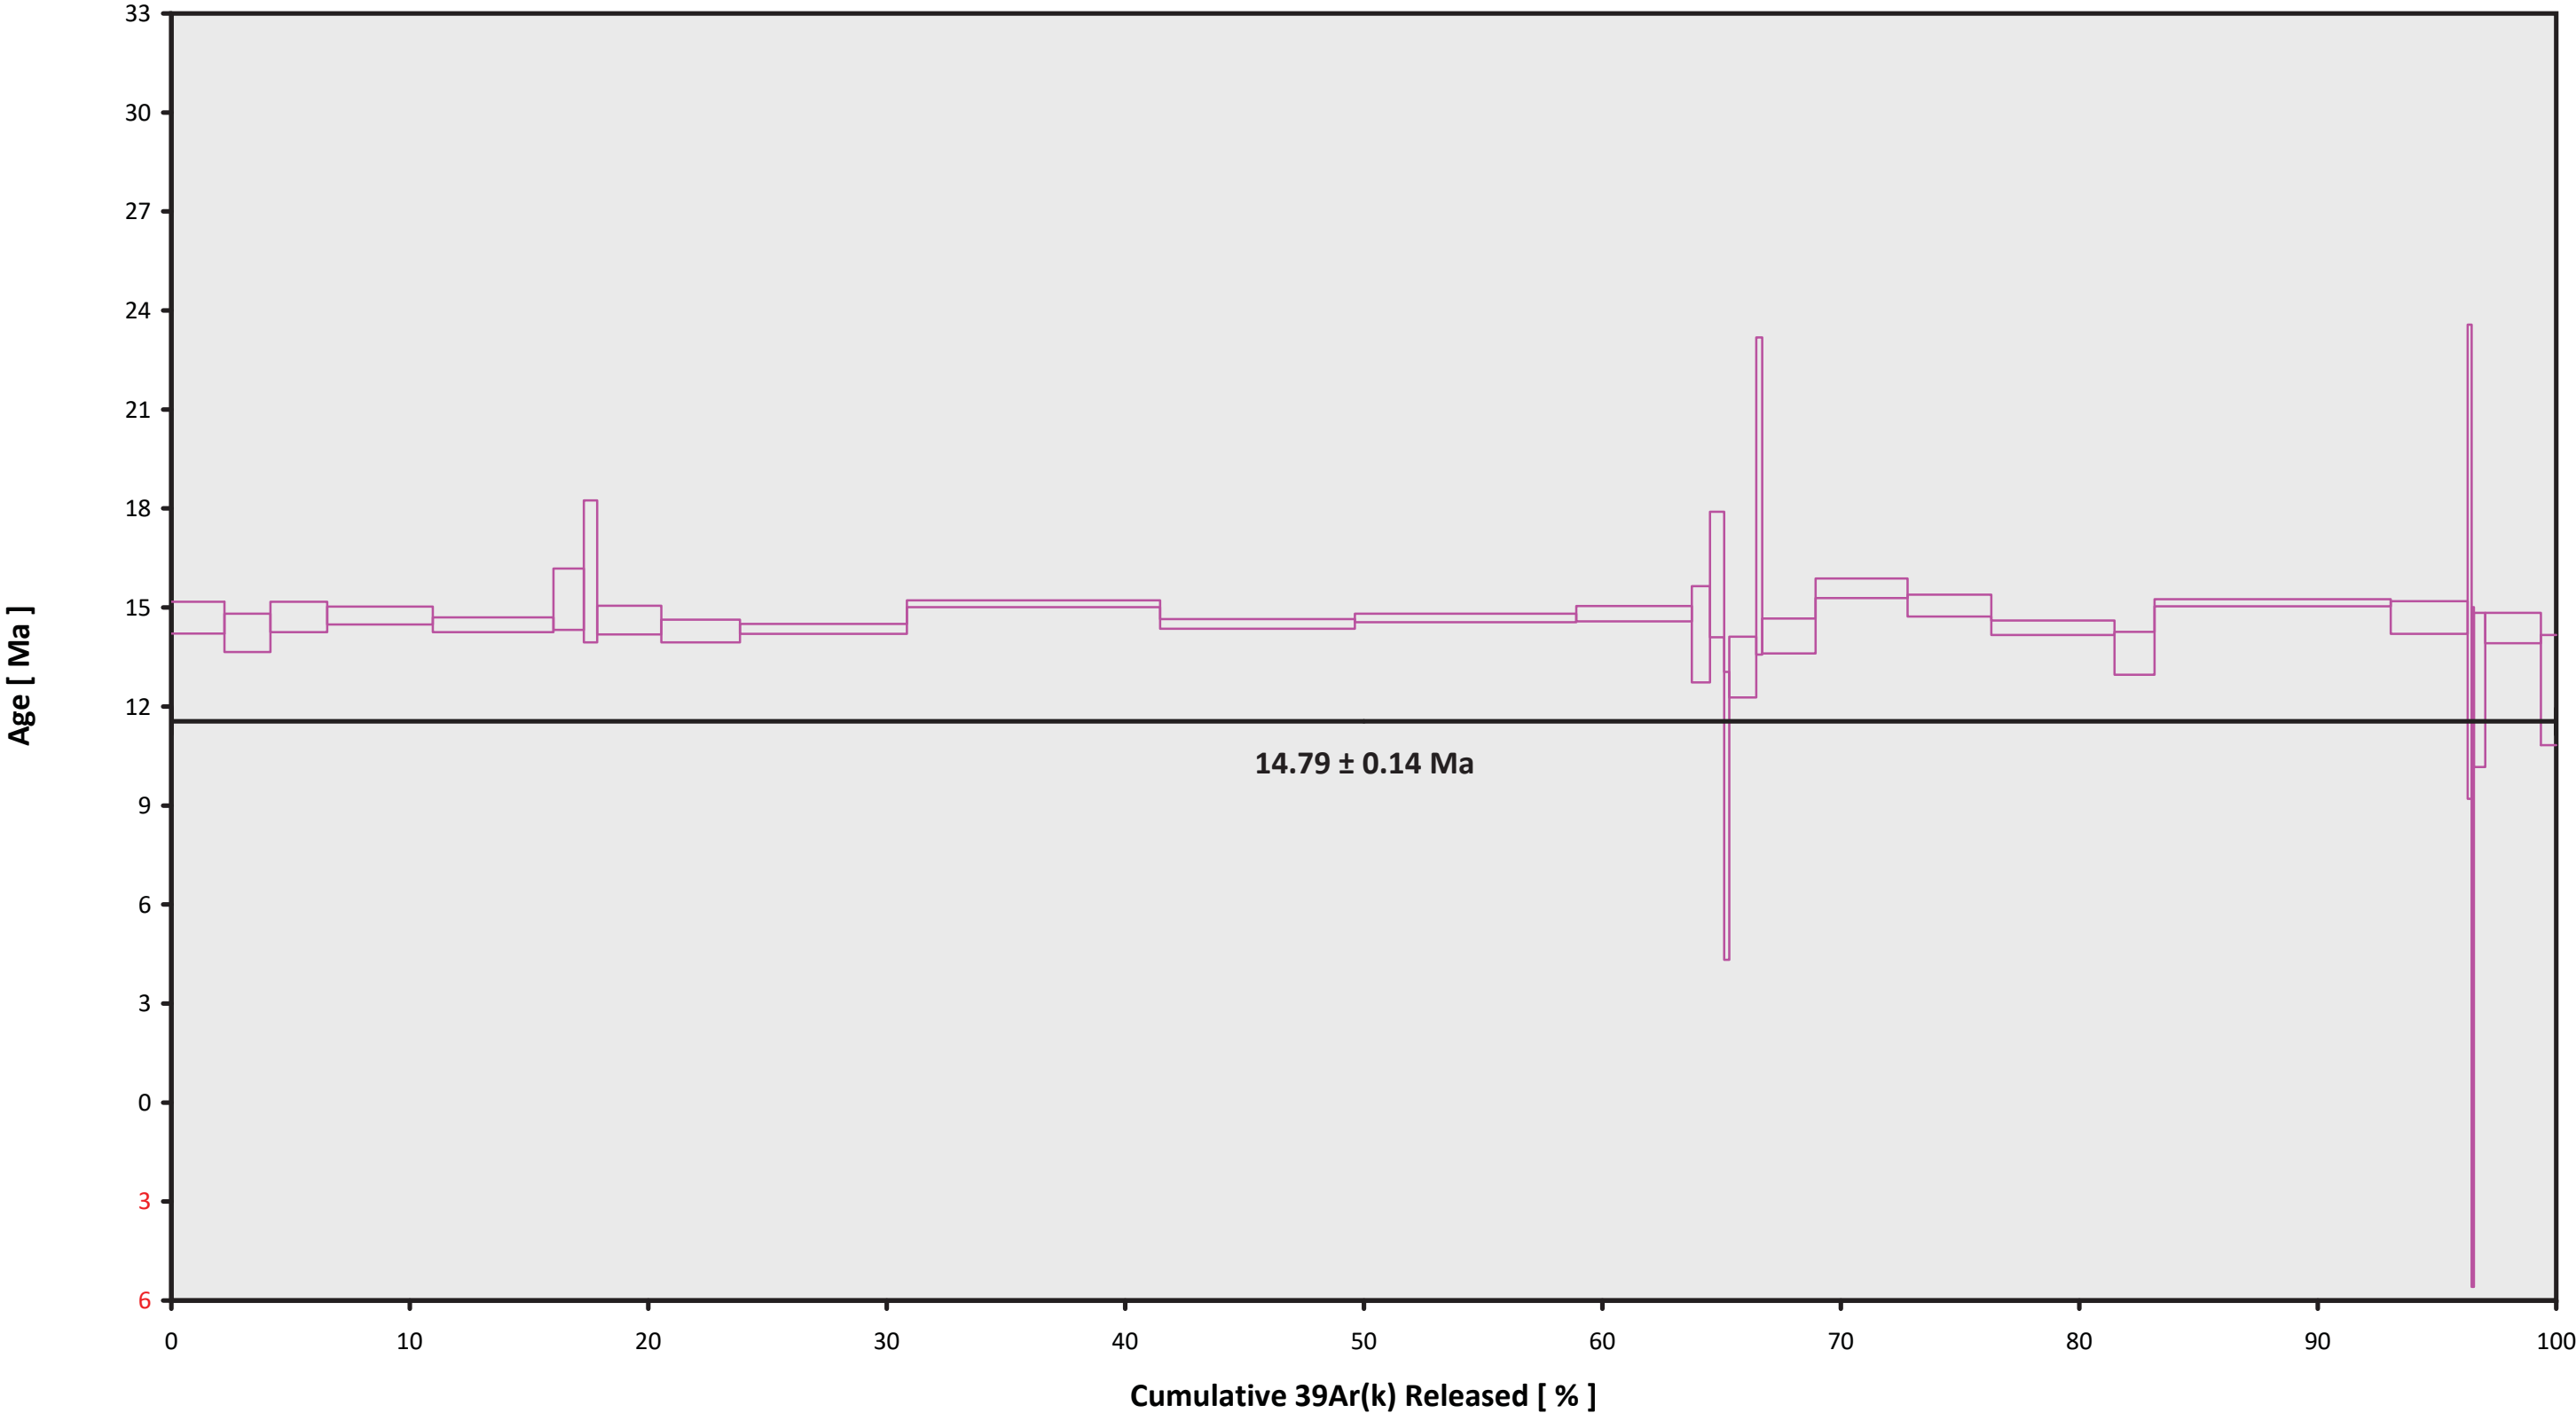

Ar-Ages in Ma

WEIGHTED PLATEAU

$14.79 \pm 0.14$

TOTAL FUSION

$14.67 \pm 0.07$

NORMAL ISOCHRON

$14.43 \pm 0.14$

INVERSE ISOCHRON

$14.79 \pm 0.15$

MSWD (PROBABILITY)

8.74 (0%)

ASSUMED TRAPPED  $^{40}\text{Ar}/^{36}\text{Ar}$  RATIO

Standard  $^{40}/^{36} = 298.56 \pm 0.104 \text{ \%SD}$

Sample Info

Plagioclase (albite?)

Unknown

Dan Miggins

IRR = 21-OSU-04 (4X17-21)

$J = 0.00164338 \pm 0.00000184$

21F16192.AGE >>> VS20-125A >>> OREGON | SWENTON (20-01) PROJECT

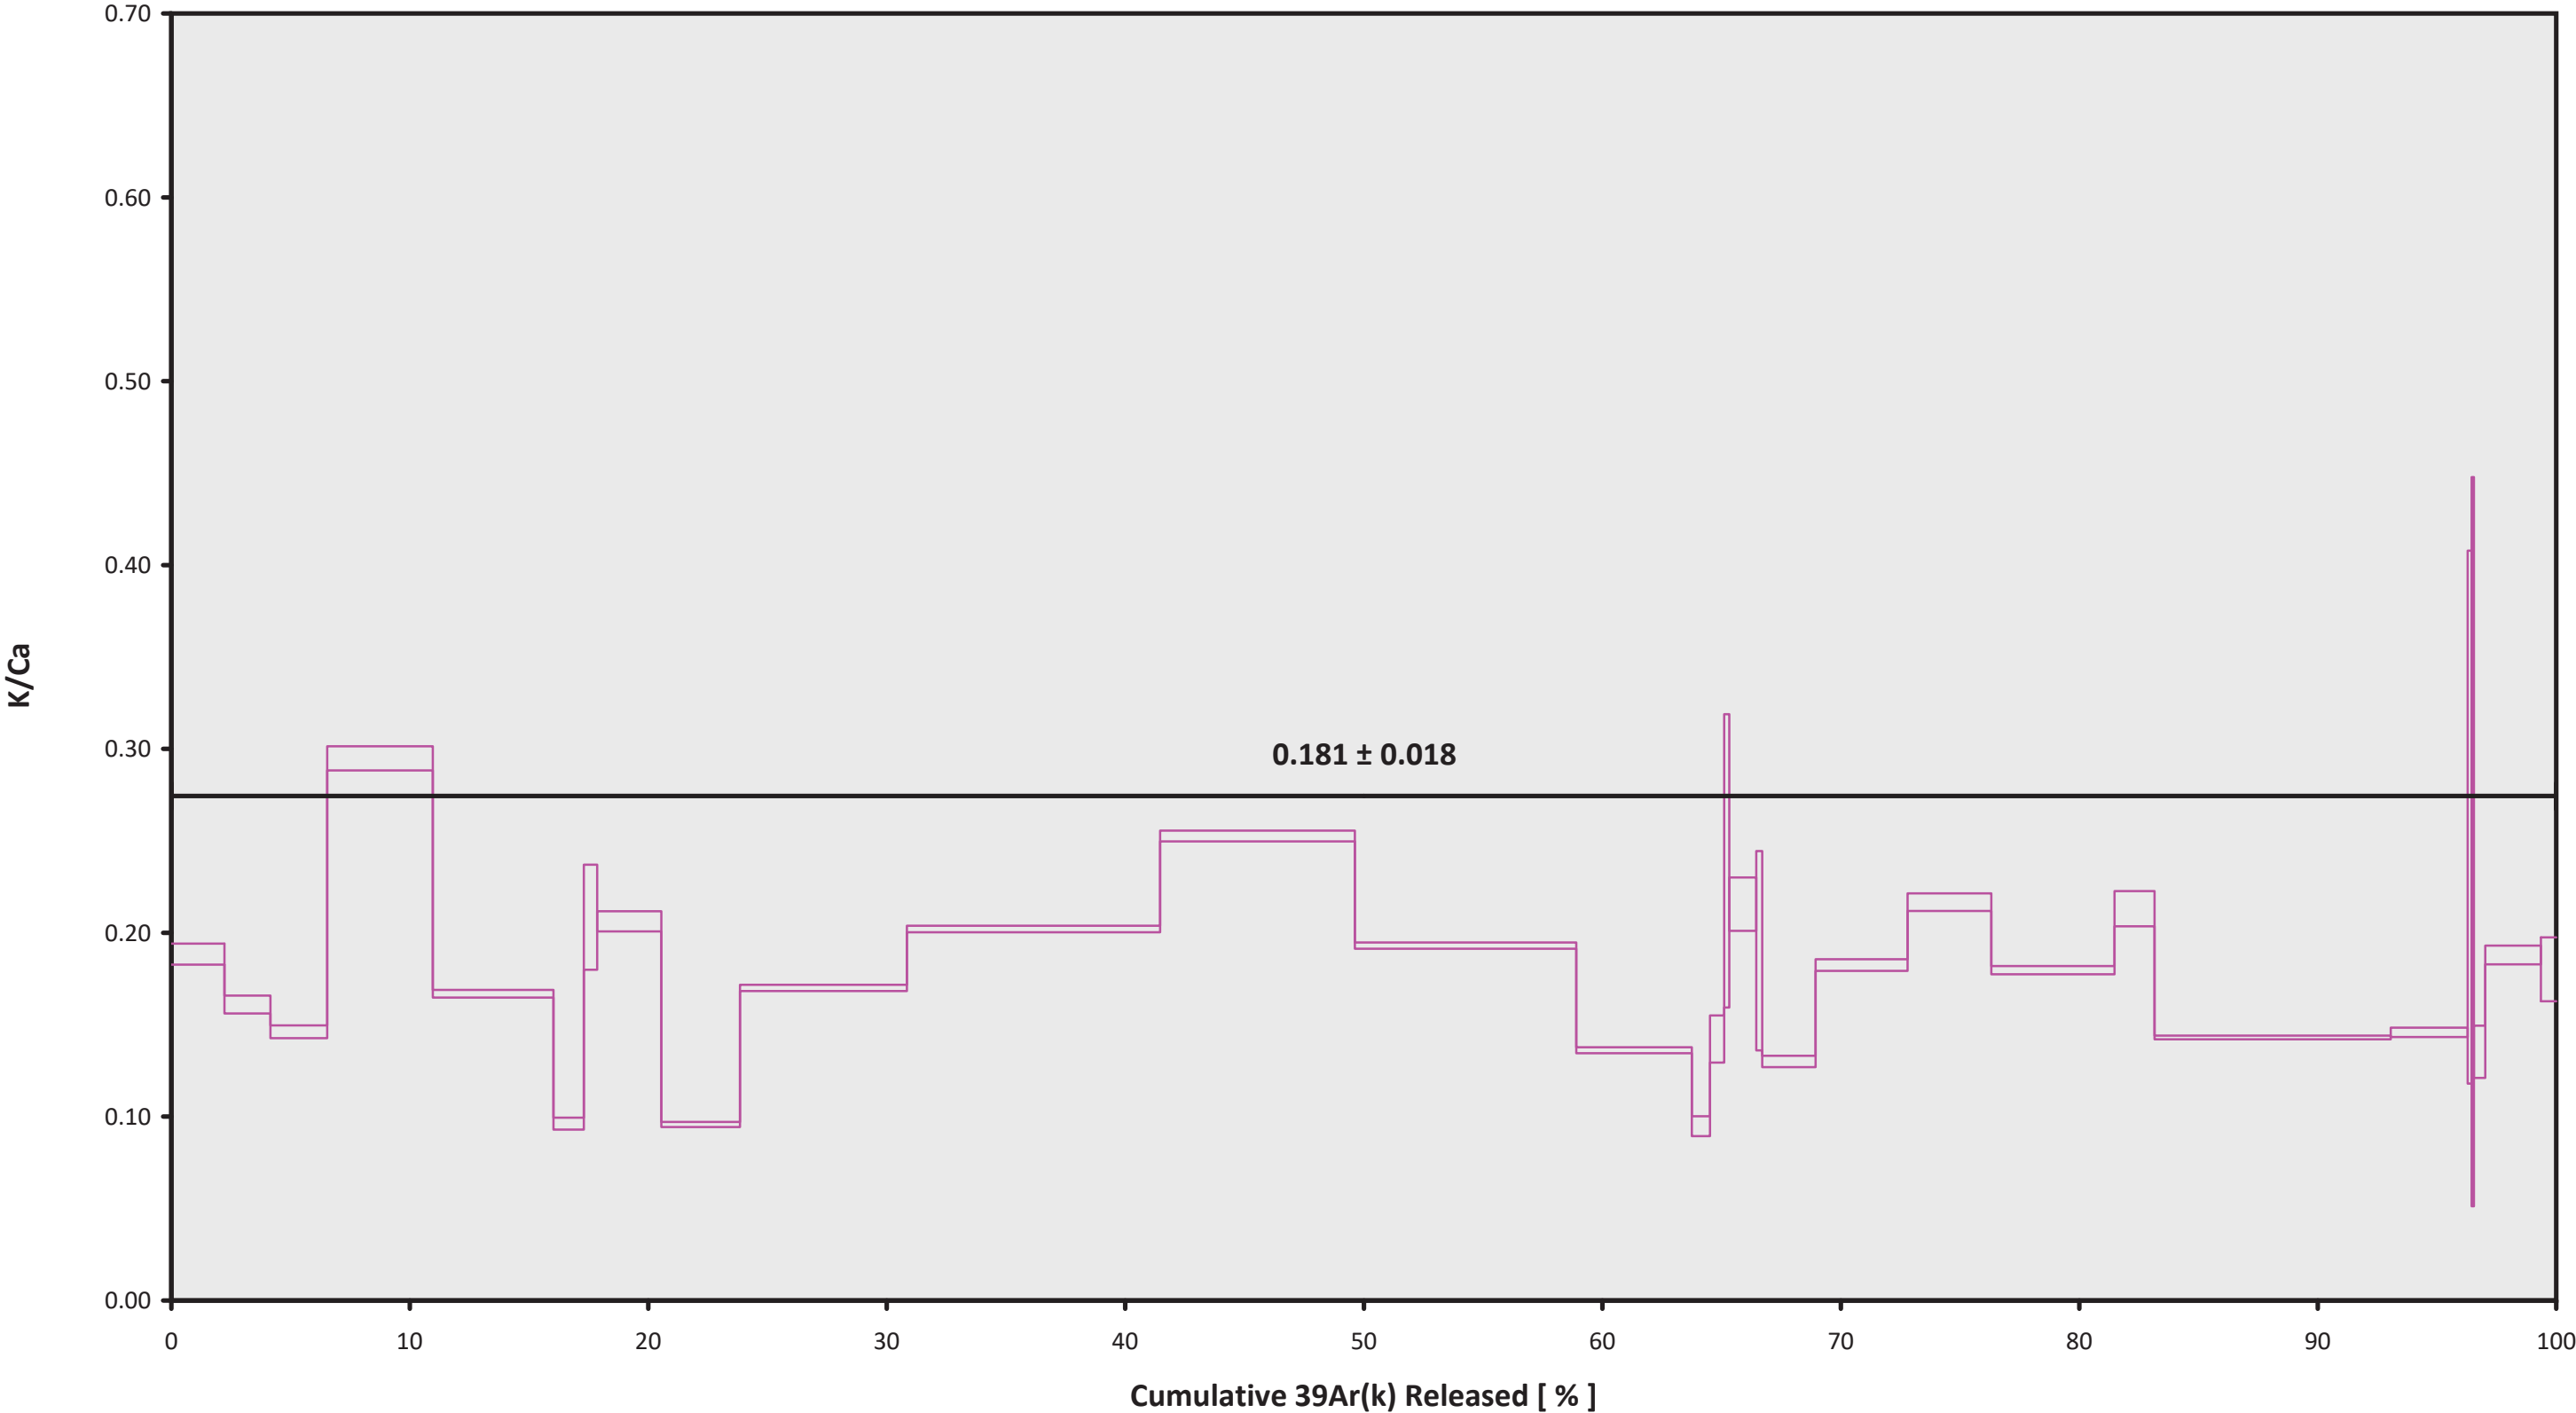

Ar-Ages in Ma

**WEIGHTED PLATEAU**

**14.79  $\pm$  0.14**

**TOTAL FUSION**

**14.67  $\pm$  0.07**

**NORMAL ISOCHRON**

**14.43  $\pm$  0.14**

**INVERSE ISOCHRON**

**14.79  $\pm$  0.15**

**ASSUMED TRAPPED  $^{40}\text{Ar}/^{36}\text{Ar}$  RATIO**

**Standard 40/36 = 298.56  $\pm$  0.104 %SD**

Sample Info

**Plagioclase (albite?)**

**Unknown**

**Dan Miggins**

**IRR = 21-OSU-04 (4X17-21)**

**J = 0.00164338  $\pm$  0.00000184**

21F16192.AGE >>> VS20-125A >>> OREGON | SWENTON (20-01) PROJECT

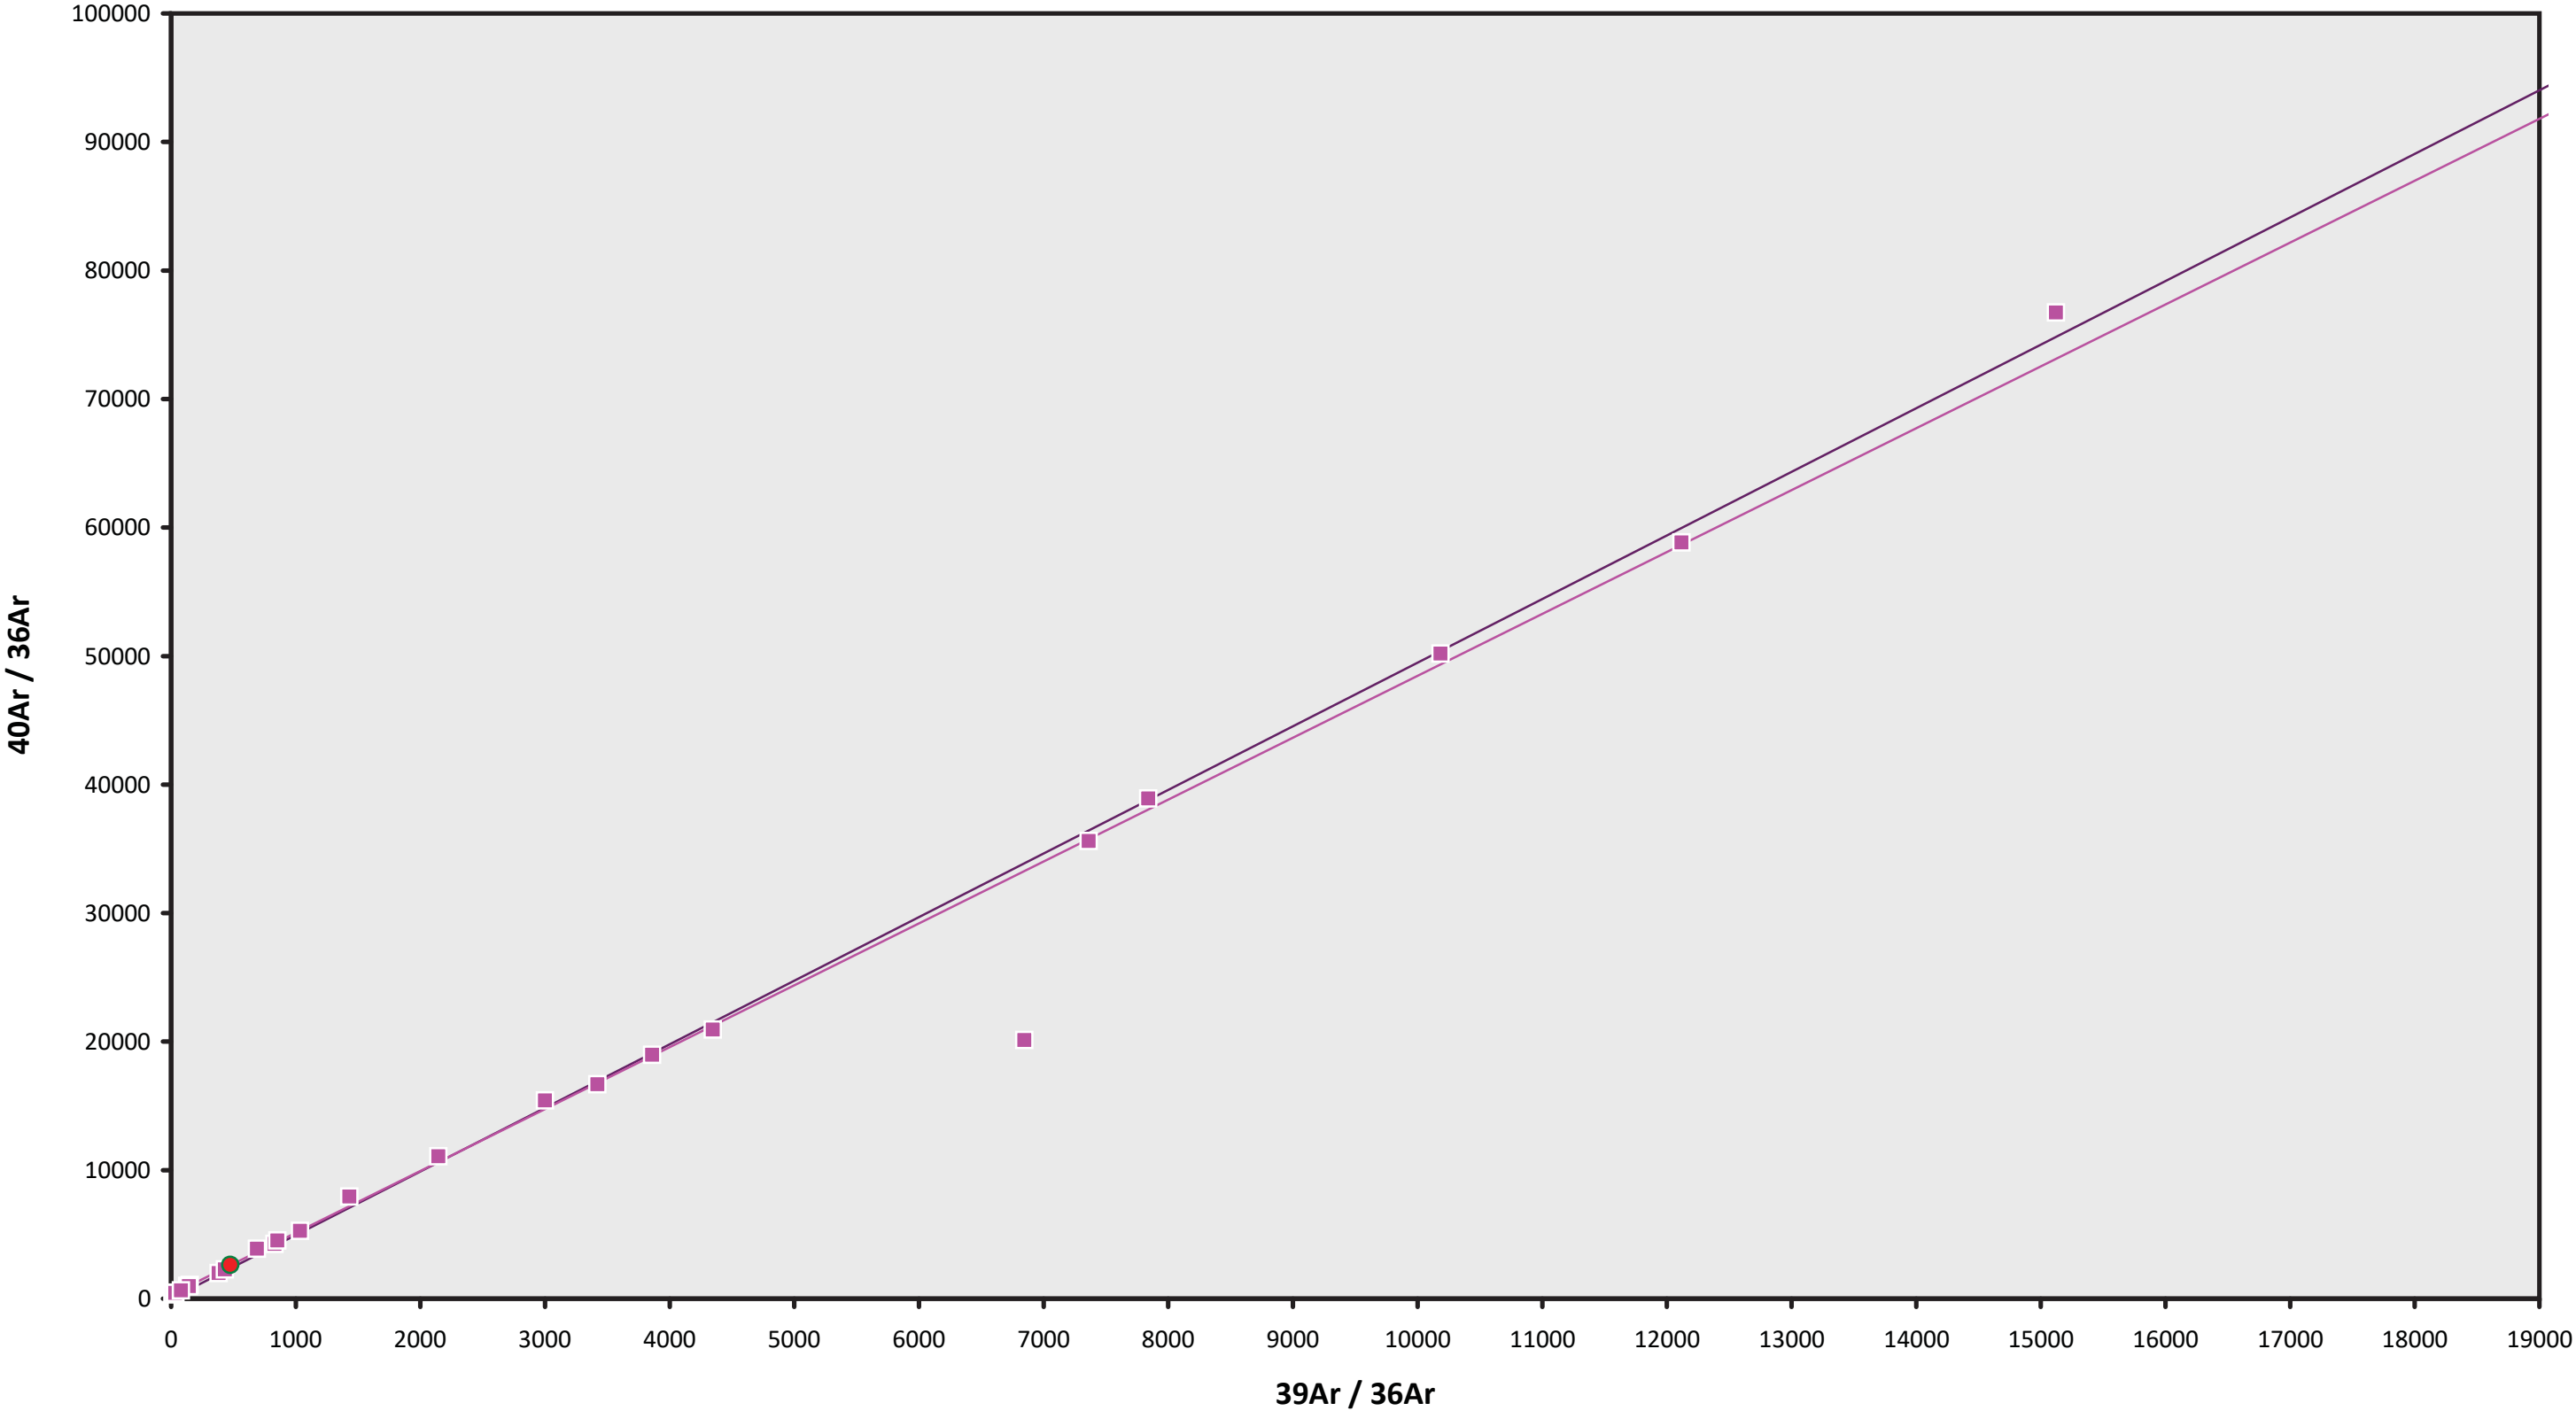

Ar-Ages in Ma

WEIGHTED PLATEAU

$14.79 \pm 0.14$

TOTAL FUSION

$14.67 \pm 0.07$

NORMAL ISOCHRON

$14.43 \pm 0.14$

INVERSE ISOCHRON

$14.79 \pm 0.15$

MSWD (PROBABILITY)

4.16 (0%)

CALCULATED  $^{40}\text{Ar}/^{36}\text{Ar}$  INTERCEPT

$298.6 \pm 10.6$

Sample Info

Plagioclase (albite?)

Unknown

Dan Miggins

IRR = 21-OSU-04 (4X17-21)

$J = 0.00164338 \pm 0.00000184$

21F16192.AGE >>> VS20-125A >>> OREGON | SWENTON (20-01) PROJECT

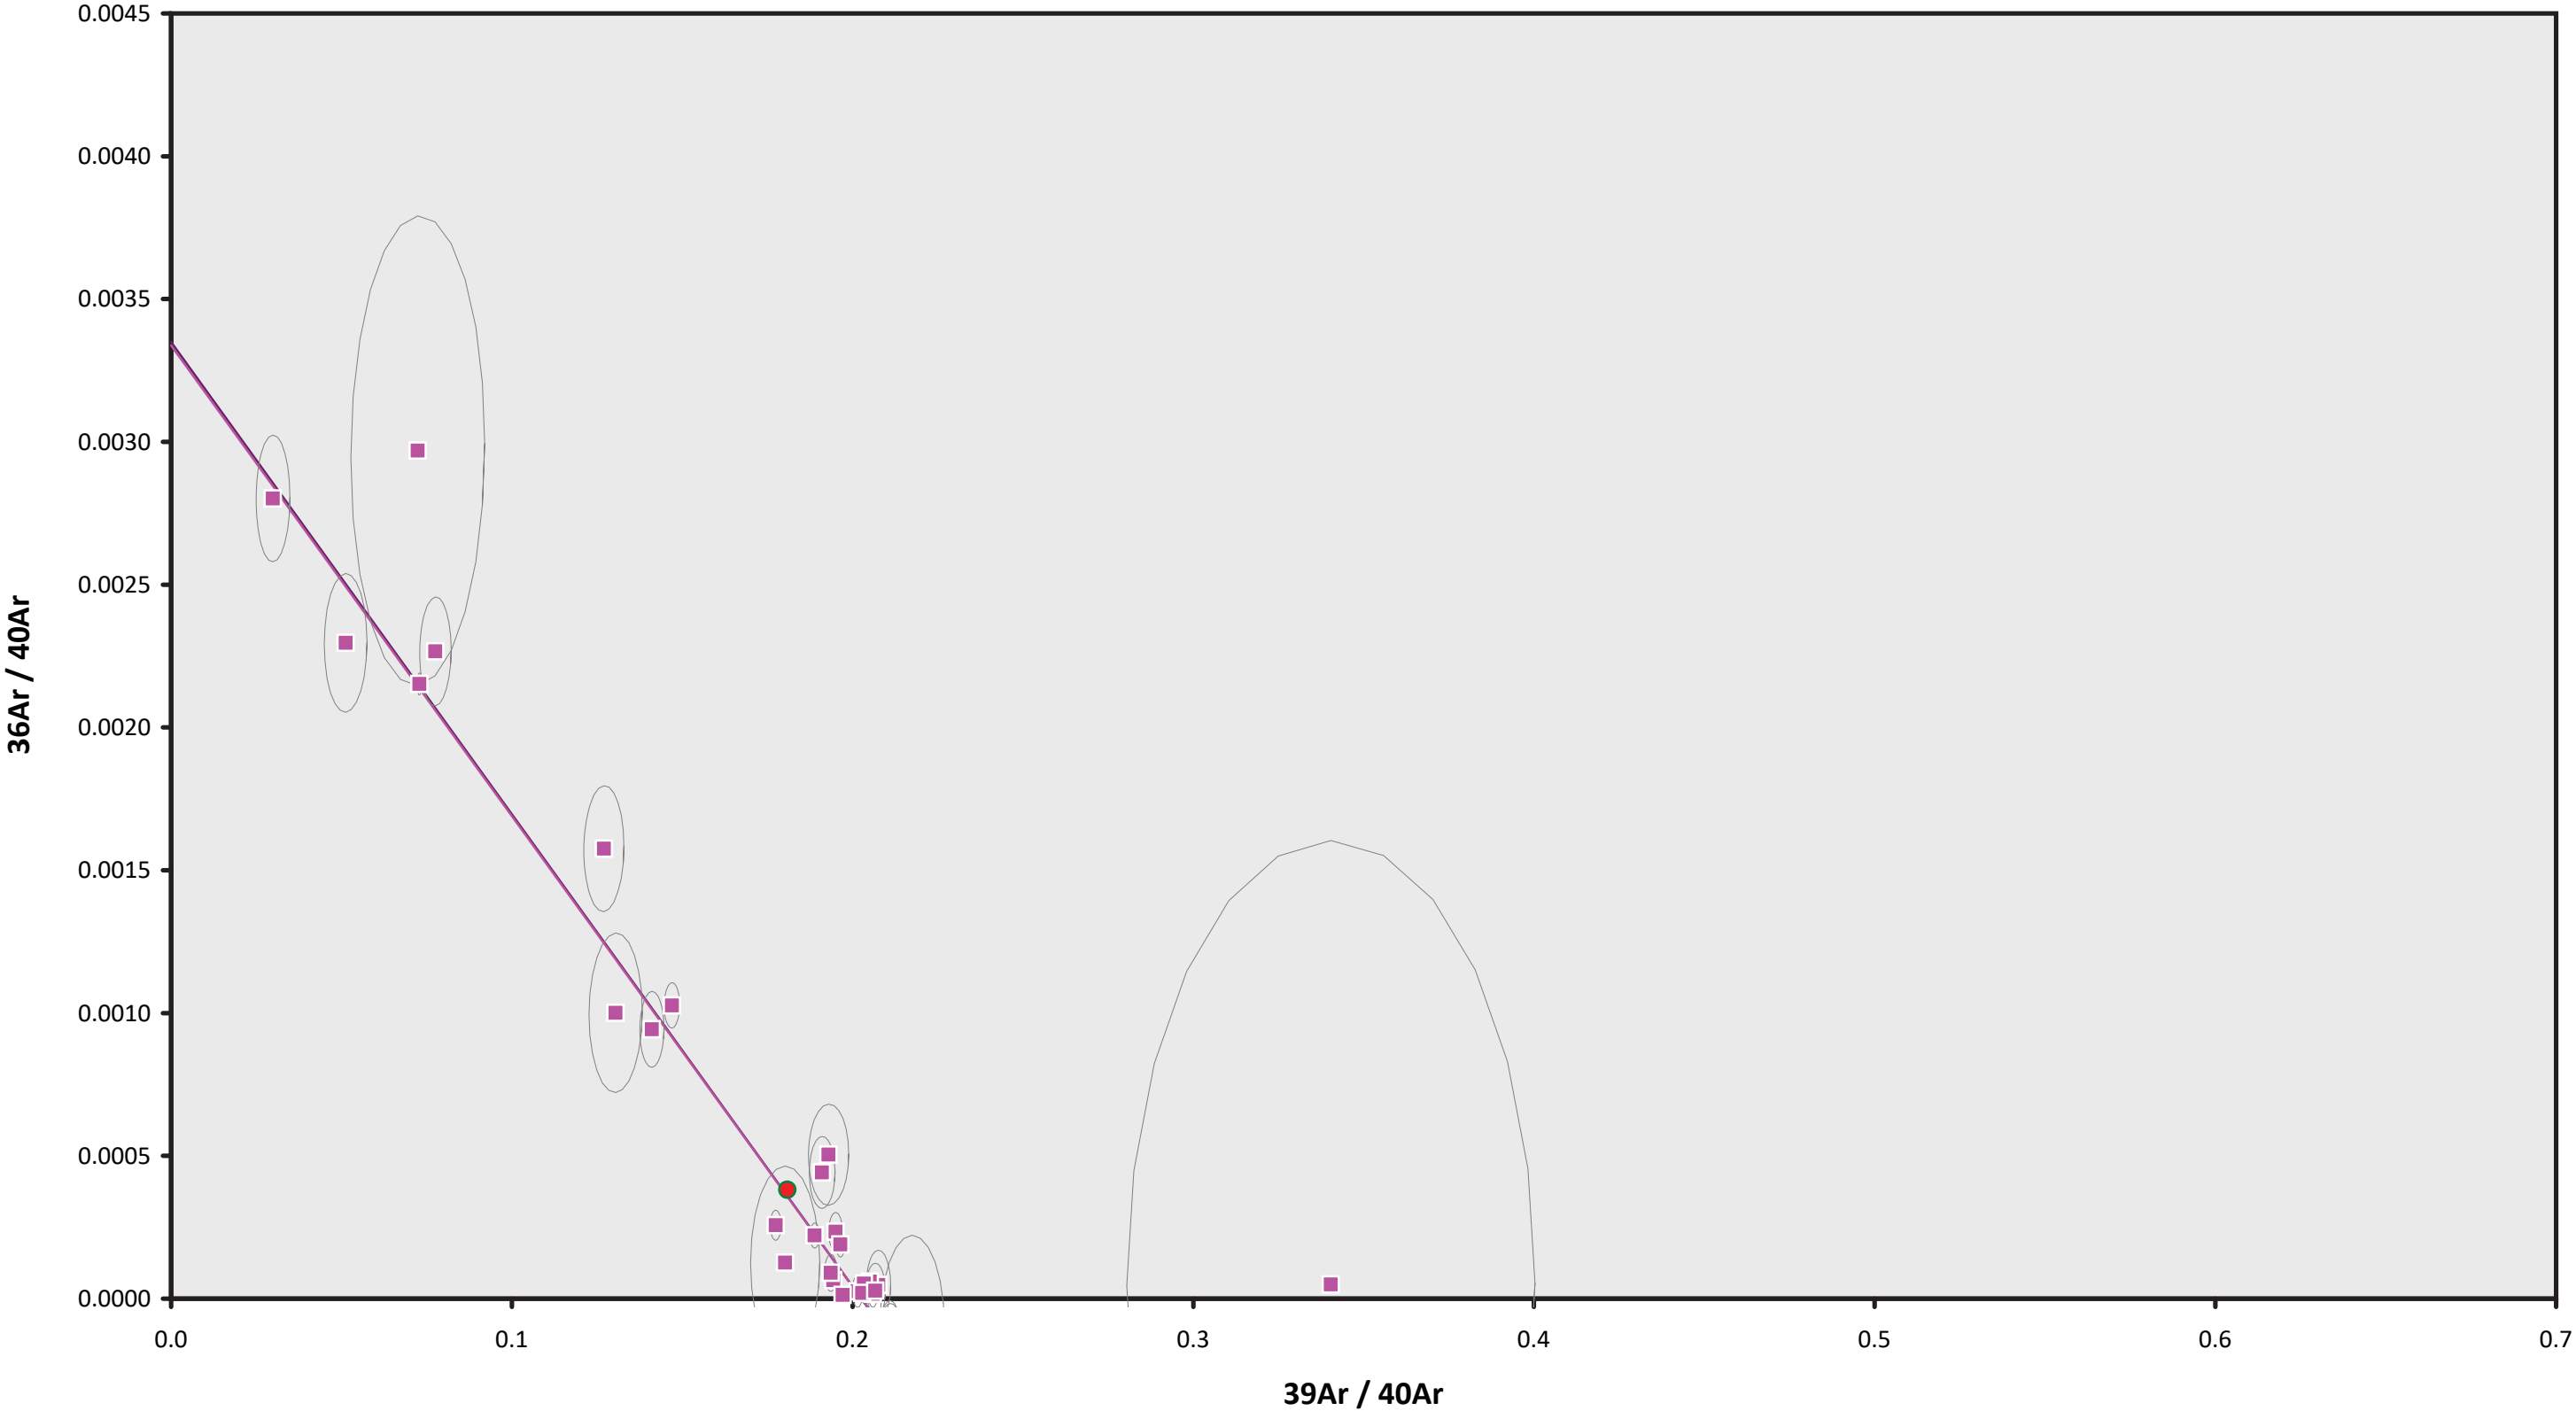

Ar-Ages in Ma

WEIGHTED PLATEAU

$14.79 \pm 0.14$

TOTAL FUSION

$14.67 \pm 0.07$

NORMAL ISOCHRON

$14.43 \pm 0.14$

INVERSE ISOCHRON

$14.79 \pm 0.15$

MSWD (PROBABILITY)

8.94 (0%)

SPREADING FACTOR

153.3%

CALCULATED  $^{40}\text{Ar}/^{36}\text{Ar}$  INTERCEPT

$299.6 \pm 15.5$

Sample Info

Plagioclase (albite?)

Unknown

Dan Miggins

IRR = 21-OSU-04 (4X17-21)

$J = 0.00164338 \pm 0.00000184$

| Relative Abundances |        |   | 36Ar<br>[fA] | %1σ   | 37Ar<br>[fA] | %1σ    | 38Ar<br>[fA] | %1σ   | 39Ar<br>[fA] | %1σ   | 40Ar<br>[fA] | %1σ   | 40(r)/39(k) ± 2σ | Age ± 2σ<br>(Ma) | 40Ar(r)<br>(%) | 39Ar(k)<br>(%) | K/Ca ± 2σ  |
|---------------------|--------|---|--------------|-------|--------------|--------|--------------|-------|--------------|-------|--------------|-------|------------------|------------------|----------------|----------------|------------|
| 21F16043            | 24.0 % | ✓ | 0.3028587    | 0.342 | 2.62949      | 1.498  | 1.303458     | 0.719 | 96.5576      | 0.041 | 597.482      | 0.007 | 5.25309 ±0.00798 | 15.82 ±0.02      | 84.89          | 2.37           | 15.8 ±0.5  |
| 21F16044            | 24.0 % | ✓ | 0.6189534    | 0.263 | 3.81934      | 1.114  | 1.566435     | 0.564 | 111.8017     | 0.040 | 768.906      | 0.005 | 5.22683 ±0.01028 | 15.74 ±0.03      | 76.00          | 2.74           | 12.6 ±0.3  |
| 21F16046            | 24.0 % | ✓ | 0.7092925    | 0.246 | 43.25225     | 0.259  | 7.602973     | 0.147 | 572.3616     | 0.038 | 3226.375     | 0.003 | 5.27275 ±0.00449 | 15.88 ±0.01      | 93.53          | 14.02          | 5.7 ±0.0   |
| 21F16047            | 24.0 % | ✓ | 0.2431854    | 0.349 | 6.44847      | 0.655  | 1.936230     | 0.489 | 146.9826     | 0.039 | 846.270      | 0.005 | 5.26676 ±0.00552 | 15.86 ±0.02      | 91.47          | 3.60           | 9.8 ±0.1   |
| 21F16049            | 24.0 % | ✓ | 0.2518303    | 0.403 | 3.47194      | 1.057  | 2.663376     | 0.358 | 207.8559     | 0.039 | 1160.730     | 0.004 | 5.22339 ±0.00507 | 15.73 ±0.02      | 93.54          | 5.09           | 25.7 ±0.5  |
| 21F16050            | 24.0 % | ✓ | 0.3087339    | 0.326 | 4.50880      | 0.942  | 1.575520     | 0.614 | 117.9301     | 0.040 | 704.311      | 0.006 | 5.19330 ±0.00679 | 15.64 ±0.02      | 86.95          | 2.89           | 11.2 ±0.2  |
| 21F16052            | 24.0 % | ✓ | 0.4676313    | 0.282 | 12.07062     | 0.423  | 2.719131     | 0.379 | 201.0286     | 0.039 | 1191.165     | 0.004 | 5.23532 ±0.00585 | 15.77 ±0.02      | 88.35          | 4.92           | 7.2 ±0.1   |
| 21F16053            | 24.0 % | ✓ | 0.3785367    | 0.310 | 8.59127      | 0.540  | 2.224581     | 0.469 | 169.1095     | 0.039 | 997.995      | 0.004 | 5.23686 ±0.00601 | 15.77 ±0.02      | 88.74          | 4.14           | 8.5 ±0.1   |
| 21F16055            | 24.0 % | ✓ | 0.1115737    | 0.610 | 3.71146      | 1.116  | 1.546740     | 0.598 | 116.2011     | 0.040 | 644.411      | 0.007 | 5.26110 ±0.00558 | 15.85 ±0.02      | 94.87          | 2.85           | 13.5 ±0.3  |
| 21F16056            | 24.0 % | ✓ | 0.5265250    | 0.277 | 13.91647     | 0.386  | 2.418541     | 0.390 | 181.3366     | 0.039 | 1108.281     | 0.004 | 5.25071 ±0.00658 | 15.81 ±0.02      | 85.91          | 4.44           | 5.6 ±0.0   |
| 21F16058            | 24.0 % | ✓ | 0.2484564    | 0.369 | 4.94078      | 0.833  | 1.157823     | 0.819 | 85.6723      | 0.041 | 520.332      | 0.007 | 5.21194 ±0.00796 | 15.70 ±0.02      | 85.81          | 2.10           | 7.5 ±0.1   |
| 21F16059            | 24.0 % | ✓ | 0.1465247    | 0.497 | 3.45426      | 1.172  | 1.401193     | 0.717 | 105.1456     | 0.040 | 596.694      | 0.006 | 5.26106 ±0.00601 | 15.85 ±0.02      | 92.71          | 2.58           | 13.1 ±0.3  |
| 21F16061            | 24.0 % | ✓ | 0.2086665    | 0.419 | 1.22369      | 2.814  | 0.902783     | 1.097 | 66.3146      | 0.042 | 409.191      | 0.008 | 5.23197 ±0.00929 | 15.76 ±0.03      | 84.79          | 1.62           | 23.3 ±1.3  |
| 21F16062            | 24.0 % | ✓ | 0.2665338    | 0.379 | 12.40880     | 0.382  | 2.576754     | 0.396 | 194.2731     | 0.039 | 1105.502     | 0.005 | 5.28564 ±0.00524 | 15.92 ±0.02      | 92.88          | 4.76           | 6.7 ±0.1   |
| 21F16064            | 24.0 % | ✓ | 0.2791852    | 0.359 | 7.82495      | 0.532  | 2.227325     | 0.440 | 169.0483     | 0.039 | 976.248      | 0.005 | 5.28521 ±0.00558 | 15.92 ±0.02      | 91.52          | 4.14           | 9.3 ±0.1   |
| 21F16065            | 24.0 % | ✓ | 0.4228484    | 0.287 | 12.41376     | 0.392  | 2.324570     | 0.417 | 174.0462     | 0.039 | 1034.591     | 0.005 | 5.22440 ±0.00607 | 15.74 ±0.02      | 87.88          | 4.26           | 6.0 ±0.0   |
| 21F16067            | 24.0 % | ✓ | 0.1809003    | 0.452 | 3.19254      | 1.302  | 1.381217     | 0.637 | 105.6538     | 0.040 | 605.929      | 0.006 | 5.22581 ±0.00638 | 15.74 ±0.02      | 91.12          | 2.59           | 14.2 ±0.4  |
| 21F16068            | 24.0 % | ✓ | 0.1526087    | 0.484 | 6.13614      | 0.647  | 0.849714     | 1.035 | 65.6362      | 0.042 | 391.949      | 0.009 | 5.28464 ±0.00826 | 15.92 ±0.02      | 88.49          | 1.61           | 4.6 ±0.1   |
| 21F16070            | 24.0 % | ✓ | 0.1578013    | 0.488 | 3.73718      | 1.077  | 1.219789     | 0.700 | 90.5011      | 0.041 | 524.113      | 0.008 | 5.27356 ±0.00681 | 15.88 ±0.02      | 91.06          | 2.22           | 10.4 ±0.2  |
| 21F16071            | 24.0 % | ✓ | 0.2403176    | 0.395 | 5.25250      | 0.782  | 1.738412     | 0.536 | 131.7168     | 0.040 | 765.198      | 0.006 | 5.26747 ±0.00615 | 15.86 ±0.02      | 90.67          | 3.23           | 10.8 ±0.2  |
| 21F16073            | 24.0 % | ✓ | 0.1245959    | 0.518 | 3.15290      | 1.252  | 1.738054     | 0.572 | 132.5361     | 0.040 | 733.469      | 0.005 | 5.25485 ±0.00515 | 15.83 ±0.02      | 94.95          | 3.25           | 18.1 ±0.5  |
| 21F16074            | 24.0 % | ✓ | 0.0233397    | 2.006 | 0.13744      | 27.884 | 0.250549     | 3.802 | 18.5799      | 0.067 | 104.656      | 0.026 | 5.25780 ±0.01691 | 15.84 ±0.05      | 93.34          | 0.46           | 58.1 ±32.4 |
| 21F16076            | 24.0 % | ✓ | 0.0713421    | 0.815 | 2.06389      | 1.797  | 0.828038     | 1.198 | 62.7390      | 0.044 | 352.042      | 0.009 | 5.27390 ±0.00730 | 15.88 ±0.02      | 93.99          | 1.54           | 13.1 ±0.5  |
| 21F16077            | 24.0 % | ✓ | 0.2390472    | 0.382 | 4.81952      | 0.853  | 0.553864     | 1.767 | 38.2208      | 0.047 | 273.710      | 0.011 | 5.30402 ±0.01569 | 15.97 ±0.05      | 74.06          | 0.94           | 3.4 ±0.1   |
| 21F16079            | 24.0 % | ✓ | 0.2567129    | 0.361 | 5.18533      | 0.733  | 2.157250     | 0.447 | 165.1465     | 0.039 | 947.040      | 0.005 | 5.27251 ±0.00544 | 15.88 ±0.02      | 91.94          | 4.05           | 13.7 ±0.2  |
| 21F16080            | 24.0 % | ✓ | 0.1697881    | 0.501 | 4.38794      | 0.898  | 1.439698     | 0.678 | 107.2891     | 0.040 | 607.176      | 0.007 | 5.18964 ±0.00642 | 15.63 ±0.02      | 91.70          | 2.63           | 10.5 ±0.2  |
| 21F16082            | 24.0 % | ✓ | 0.2429688    | 0.394 | 13.69060     | 0.382  | 1.649356     | 0.583 | 123.2083     | 0.040 | 716.840      | 0.006 | 5.23811 ±0.00639 | 15.78 ±0.02      | 90.02          | 3.02           | 3.9 ±0.0   |
| 21F16083            | 24.0 % | ✓ | 0.2576989    | 0.360 | 8.91182      | 0.494  | 1.530891     | 0.643 | 115.0625     | 0.040 | 682.581      | 0.006 | 5.26952 ±0.00656 | 15.87 ±0.02      | 88.82          | 2.82           | 5.6 ±0.1   |
| 21F16085            | 24.0 % | ✓ | 0.1268441    | 0.528 | 14.47091     | 0.374  | 1.145856     | 0.802 | 87.4084      | 0.041 | 499.187      | 0.008 | 5.29105 ±0.00645 | 15.94 ±0.02      | 92.64          | 2.14           | 2.6 ±0.0   |
| 21F16086            | 24.0 % | ✓ | 0.1070128    | 0.608 | 5.64726      | 0.782  | 1.622565     | 0.564 | 123.0863     | 0.040 | 683.740      | 0.006 | 5.29868 ±0.00538 | 15.96 ±0.02      | 95.38          | 3.02           | 9.4 ±0.1   |
| Σ                   |        |   | 7.8423143    | 0.069 | 225.47229    | 0.114  | 54.252686    | 0.097 | 4082.4501    | 0.009 | 23776.115    | 0.001 |                  |                  |                |                |            |

| Information on Analysis and Constants Used in Calculations |  |
|------------------------------------------------------------|--|
| Project = <b>SWENTON (20-01)</b>                           |  |
| Sample = <b>VS19-079</b>                                   |  |
| Material = <b>Biotite</b>                                  |  |
| Location = <b>Birch Creek</b>                              |  |
| Region = <b>Eastern Oregon</b>                             |  |
| Analyst = <b>Dan Miggins</b>                               |  |
| Irradiation = <b>21-OSU-04 (4X10-21)</b>                   |  |
| Position = <b>X: 0   Y: 0   Z/H: 10.05296 mm</b>           |  |
| FCT-NM Age = <b>28.201 ±0.023 Ma</b>                       |  |
| FCT-NM Reference = <b>Kuiper et al (2008)</b>              |  |
| FCT-NM 40Ar/39Ar Ratio = <b>9.39513 ±0.01062</b>           |  |
| FCT-NMJ-value = <b>0.00165250 ±0.00000187</b>              |  |
| Air Shot 40Ar/36Ar = <b>301.8500 ±0.3351</b>               |  |
| Air Shot MDF = <b>0.99727161 ±0.00037661 (LIN)</b>         |  |
| Experiment Type = <b>Total Fusion</b>                      |  |
| Extraction Method = <b>Single Crystal Laser Heating</b>    |  |
| Heating = <b>62 sec</b>                                    |  |
| Isolation = <b>3.00 min</b>                                |  |
| Instrument = <b>ARGUS-VI-F</b>                             |  |
| Preferred Age = <b>Ideogram Age</b>                        |  |
| Age Classification = <b>Eruption Age</b>                   |  |
| IGSN = <b>Undefined</b>                                    |  |
| Rock Class = <b>Undefined</b>                              |  |
| Lithology = <b>Undefined</b>                               |  |
| Lat-Lon = <b>Undefined - Undefined</b>                     |  |

| Results                         | 40(a)/36(a) ± 2σ        | 40(r)/39(k) ± 2σ                        | Age ± 2σ<br>(Ma)      | M\$WD          | 39Ar(k)<br>(%,n)                           | K/Ca ± 2σ |
|---------------------------------|-------------------------|-----------------------------------------|-----------------------|----------------|--------------------------------------------|-----------|
| Age Plateau<br>Error Mean       |                         | 5.25528 ±0.01037<br>±0.20%              | 15.83 ±0.05<br>±0.30% | 80.21<br>0%    | 100.00<br>30                               | 12.0 ±3.8 |
|                                 |                         | Full External Error<br>Analytical Error | ±0.82<br>±0.03        | 1.53<br>8.9559 | 2σ Confidence Limit<br>Error Magnification |           |
| Total Fusion Age                |                         | 5.25452 ±0.00124<br>±0.02%              | 15.83 ±0.04<br>±0.23% |                | 30                                         | 7.8 ±0.0  |
|                                 |                         | Full External Error<br>Analytical Error | ±0.82<br>±0.00        |                |                                            |           |
| Normal Isochron<br>Error Chron  | 287.32 ±12.29<br>±4.28% | 5.27399 ±0.02442<br>±0.46%              | 15.88 ±0.08<br>±0.51% | 81.50<br>0%    | 100.00<br>30                               |           |
|                                 |                         | Full External Error<br>Analytical Error | ±0.83<br>±0.07        | 1.53<br>9.0279 | 2σ Confidence Limit<br>Error Magnification |           |
|                                 |                         |                                         |                       | 90             | Number of Iterations                       |           |
|                                 |                         |                                         |                       | 0.0000522985   | Convergence                                |           |
| Inverse Isochron<br>Error Chron | 289.00 ±12.00<br>±4.15% | 5.27242 ±0.02384<br>±0.45%              | 15.88 ±0.08<br>±0.50% | 78.85<br>0%    | 100.00<br>30                               |           |
|                                 |                         | Full External Error<br>Analytical Error | ±0.83<br>±0.07        | 1.53<br>8.8799 | 2σ Confidence Limit<br>Error Magnification |           |
|                                 |                         |                                         |                       | 3              | Number of Iterations                       |           |
|                                 |                         |                                         |                       | 0.0003199855   | Convergence                                |           |
|                                 |                         |                                         |                       | 22%            | Spreading Factor                           |           |



| Incremental Heating |        |   | 36Ar(a)<br>[fA] | 37Ar(ca)<br>[fA] | 38Ar(cl)<br>[fA] | 39Ar(k)<br>[fA] | 40Ar(r)<br>[fA] | Age ± 2σ<br>(Ma) | 40Ar(r)<br>(%) | 39Ar(k)<br>(%) | K/Ca ± 2σ  |
|---------------------|--------|---|-----------------|------------------|------------------|-----------------|-----------------|------------------|----------------|----------------|------------|
| 21F16043            | 24.0 % | ✓ | 0.3021384       | 2.62949          | 0.0799261        | 96.5559         | 507.217         | 15.82 ±0.02      | 84.89          | 2.37           | 15.8 ±0.5  |
| 21F16044            | 24.0 % | ✓ | 0.6179091       | 3.81934          | 0.0990718        | 111.7992        | 584.355         | 15.74 ±0.03      | 76.00          | 2.74           | 12.6 ±0.3  |
| 21F16046            | 24.0 % | ✓ | 0.6975353       | 43.25225         | 0.5516270        | 572.3338        | 3017.772        | 15.88 ±0.01      | 93.53          | 14.02          | 5.7 ±0.0   |
| 21F16047            | 24.0 % | ✓ | 0.2414286       | 6.44847          | 0.1145014        | 146.9784        | 774.100         | 15.86 ±0.02      | 91.47          | 3.60           | 9.8 ±0.1   |
| 21F16049            | 24.0 % | ✓ | 0.2508792       | 3.47194          | 0.1052110        | 207.8537        | 1085.702        | 15.73 ±0.02      | 93.54          | 5.09           | 25.7 ±0.5  |
| 21F16050            | 24.0 % | ✓ | 0.3075041       | 4.50880          | 0.0925375        | 117.9272        | 612.431         | 15.64 ±0.02      | 86.95          | 2.89           | 11.2 ±0.2  |
| 21F16052            | 24.0 % | ✓ | 0.4643444       | 12.07062         | 0.2017005        | 201.0209        | 1052.409        | 15.77 ±0.02      | 88.35          | 4.92           | 7.2 ±0.1   |
| 21F16053            | 24.0 % | ✓ | 0.3762013       | 8.59127          | 0.1098525        | 169.1039        | 885.574         | 15.77 ±0.02      | 88.74          | 4.14           | 8.5 ±0.1   |
| 21F16055            | 24.0 % | ✓ | 0.1105559       | 3.71146          | 0.1219005        | 116.1987        | 611.333         | 15.85 ±0.02      | 94.87          | 2.85           | 13.5 ±0.3  |
| 21F16056            | 24.0 % | ✓ | 0.5227480       | 13.91647         | 0.1276036        | 181.3277        | 952.099         | 15.81 ±0.02      | 85.91          | 4.44           | 5.6 ±0.0   |
| 21F16058            | 24.0 % | ✓ | 0.2471118       | 4.94078          | 0.0757266        | 85.6692         | 446.502         | 15.70 ±0.02      | 85.81          | 2.10           | 7.5 ±0.1   |
| 21F16059            | 24.0 % | ✓ | 0.1455787       | 3.45426          | 0.1033129        | 105.1434        | 553.166         | 15.85 ±0.02      | 92.71          | 2.58           | 13.1 ±0.3  |
| 21F16061            | 24.0 % | ✓ | 0.2083282       | 1.22369          | 0.0624215        | 66.3138         | 346.952         | 15.76 ±0.03      | 84.79          | 1.62           | 23.3 ±1.3  |
| 21F16062            | 24.0 % | ✓ | 0.2631582       | 12.40880         | 0.1787743        | 194.2652        | 1026.816        | 15.92 ±0.02      | 92.88          | 4.76           | 6.7 ±0.1   |
| 21F16064            | 24.0 % | ✓ | 0.2770543       | 7.82495          | 0.1321564        | 169.0432        | 893.428         | 15.92 ±0.02      | 91.52          | 4.14           | 9.3 ±0.1   |
| 21F16065            | 24.0 % | ✓ | 0.4194760       | 12.41376         | 0.1414051        | 174.0382        | 909.246         | 15.74 ±0.02      | 87.88          | 4.26           | 6.0 ±0.0   |
| 21F16067            | 24.0 % | ✓ | 0.1800289       | 3.19254          | 0.0707513        | 105.6517        | 552.115         | 15.74 ±0.02      | 91.12          | 2.59           | 14.2 ±0.4  |
| 21F16068            | 24.0 % | ✓ | 0.1509468       | 6.13614          | 0.0275154        | 65.6323         | 346.843         | 15.92 ±0.02      | 88.49          | 1.61           | 4.6 ±0.1   |
| 21F16070            | 24.0 % | ✓ | 0.1567795       | 3.73718          | 0.0966103        | 90.4987         | 477.250         | 15.88 ±0.02      | 91.06          | 2.22           | 10.4 ±0.2  |
| 21F16071            | 24.0 % | ✓ | 0.2388856       | 5.25250          | 0.1017334        | 131.7134        | 693.796         | 15.86 ±0.02      | 90.67          | 3.23           | 10.8 ±0.2  |
| 21F16073            | 24.0 % | ✓ | 0.1237300       | 3.15290          | 0.1135486        | 132.5341        | 696.447         | 15.83 ±0.02      | 94.95          | 3.25           | 18.1 ±0.5  |
| 21F16074            | 24.0 % | ✓ | 0.0233000       | 0.13744          | 0.0217444        | 18.5798         | 97.689          | 15.84 ±0.05      | 93.34          | 0.46           | 58.1 ±32.4 |
| 21F16076            | 24.0 % | ✓ | 0.0707774       | 2.06389          | 0.0566419        | 62.7377         | 330.872         | 15.88 ±0.02      | 93.99          | 1.54           | 13.1 ±0.5  |
| 21F16077            | 24.0 % | ✓ | 0.2377389       | 4.81952          | 0.0466281        | 38.2177         | 202.707         | 15.97 ±0.05      | 74.06          | 0.94           | 3.4 ±0.1   |
| 21F16079            | 24.0 % | ✓ | 0.2552977       | 5.18533          | 0.1137589        | 165.1432        | 870.719         | 15.88 ±0.02      | 91.94          | 4.05           | 13.7 ±0.2  |
| 21F16080            | 24.0 % | ✓ | 0.1685887       | 4.38794          | 0.1114324        | 107.2863        | 556.777         | 15.63 ±0.02      | 91.70          | 2.63           | 10.5 ±0.2  |
| 21F16082            | 24.0 % | ✓ | 0.2392545       | 13.69060         | 0.1139120        | 123.1995        | 645.333         | 15.78 ±0.02      | 90.02          | 3.02           | 3.9 ±0.0   |
| 21F16083            | 24.0 % | ✓ | 0.2552790       | 8.91182          | 0.0916259        | 115.0568        | 606.295         | 15.87 ±0.02      | 88.82          | 2.82           | 5.6 ±0.1   |
| 21F16085            | 24.0 % | ✓ | 0.1229249       | 14.47091         | 0.0645613        | 87.3991         | 462.433         | 15.94 ±0.02      | 92.64          | 2.14           | 2.6 ±0.0   |
| 21F16086            | 24.0 % | ✓ | 0.1054725       | 5.64726          | 0.1151974        | 123.0827        | 652.176         | 15.96 ±0.02      | 95.38          | 3.02           | 9.4 ±0.1   |
| Σ                   |        |   | 7.7809558       | 225.47229        | 3.4433902        | 4082.3052       | 21450.555       |                  |                |                |            |

| Information on Analysis                                                                                                                                                                                                                             |                  |                  |                           |        |                     |           |
|-----------------------------------------------------------------------------------------------------------------------------------------------------------------------------------------------------------------------------------------------------|------------------|------------------|---------------------------|--------|---------------------|-----------|
| Project = SWENTON (20-01)<br>Sample = VS19-079<br>Material = Biotite<br>Location = Birch Creek<br>Region = Eastern Oregon<br>Analyst = Dan Miggins<br>Irradiation = 21-OSU-04 (4X10-21)<br>J = 0.00165250 ±0.00000187<br>FCT-NM = 28.201 ± 0.023 Ma | Results          | 40(r)/39(k) ± 2σ | Age ± 2σ (Ma)             | MSWD   | 39Ar(k) (% ,n)      | K/Ca ± 2σ |
|                                                                                                                                                                                                                                                     | Age Plateau      | 5.25528 ±0.01037 | 15.83 ±0.05               | 80.21  | 100.00              | 12.0 ±3.8 |
|                                                                                                                                                                                                                                                     | Error Mean       | ±0.20%           | ±0.30%                    | 0%     | 30                  |           |
|                                                                                                                                                                                                                                                     |                  |                  | Full External Error ±0.82 | 1.53   | 2σ Confidence Limit |           |
|                                                                                                                                                                                                                                                     |                  |                  | Analytical Error ±0.03    | 8.9559 | Error Magnification |           |
|                                                                                                                                                                                                                                                     | Total Fusion Age | 5.25452 ±0.00124 | 15.83 ±0.04               |        | 30                  | 7.8 ±0.0  |
|                                                                                                                                                                                                                                                     |                  | ±0.02%           | ±0.23%                    |        |                     |           |
|                                                                                                                                                                                                                                                     |                  |                  | Full External Error ±0.82 |        |                     |           |
|                                                                                                                                                                                                                                                     |                  |                  | Analytical Error ±0.00    |        |                     |           |

| Normal Isochron |        |   | 39(k)/36(a) ± 2σ | 40(a+r)/36(a) ± 2σ | r.i.   |
|-----------------|--------|---|------------------|--------------------|--------|
| 21F16043        | 24.0 % | ✓ | 319.57 ±2.21     | 1977.32 ±13.57     | 0.9929 |
| 21F16044        | 24.0 % | ✓ | 180.93 ±0.97     | 1244.26 ±6.57      | 0.9886 |
| 21F16046        | 24.0 % | ✓ | 820.51 ±4.15     | 4624.90 ±23.11     | 0.9885 |
| 21F16047        | 24.0 % | ✓ | 608.79 ±4.31     | 3504.89 ±24.65     | 0.9937 |
| 21F16049        | 24.0 % | ✓ | 828.50 ±6.73     | 4626.15 ±37.43     | 0.9954 |
| 21F16050        | 24.0 % | ✓ | 383.50 ±2.53     | 2290.18 ±14.99     | 0.9926 |
| 21F16052        | 24.0 % | ✓ | 432.91 ±2.48     | 2565.00 ±14.59     | 0.9907 |
| 21F16053        | 24.0 % | ✓ | 449.50 ±2.83     | 2652.55 ±16.56     | 0.9921 |
| 21F16055        | 24.0 % | ✓ | 1051.04 ±12.98   | 5828.19 ±71.80     | 0.9978 |
| 21F16056        | 24.0 % | ✓ | 346.87 ±1.95     | 2119.90 ±11.81     | 0.9902 |
| 21F16058        | 24.0 % | ✓ | 346.68 ±2.59     | 2105.44 ±15.62     | 0.9937 |
| 21F16059        | 24.0 % | ✓ | 722.24 ±7.24     | 4098.34 ±40.98     | 0.9967 |
| 21F16061        | 24.0 % | ✓ | 318.31 ±2.68     | 1963.97 ±16.48     | 0.9948 |
| 21F16062        | 24.0 % | ✓ | 738.21 ±5.69     | 4200.46 ±32.24     | 0.9948 |
| 21F16064        | 24.0 % | ✓ | 610.14 ±4.44     | 3523.30 ±25.49     | 0.9941 |
| 21F16065        | 24.0 % | ✓ | 414.89 ±2.43     | 2466.14 ±14.29     | 0.9908 |
| 21F16067        | 24.0 % | ✓ | 586.86 ±5.35     | 3365.38 ±30.57     | 0.9960 |
| 21F16068        | 24.0 % | ✓ | 434.80 ±4.27     | 2596.34 ±25.41     | 0.9961 |
| 21F16070        | 24.0 % | ✓ | 577.24 ±5.69     | 3342.65 ±32.82     | 0.9964 |
| 21F16071        | 24.0 % | ✓ | 551.37 ±4.41     | 3202.86 ±25.47     | 0.9949 |
| 21F16073        | 24.0 % | ✓ | 1071.16 ±11.20   | 5927.33 ±61.82     | 0.9971 |
| 21F16074        | 24.0 % | ✓ | 797.42 ±32.08    | 4491.22 ±180.60    | 0.9994 |
| 21F16076        | 24.0 % | ✓ | 886.41 ±14.58    | 4973.39 ±81.71     | 0.9985 |
| 21F16077        | 24.0 % | ✓ | 160.75 ±1.24     | 1151.21 ±8.85      | 0.9922 |
| 21F16079        | 24.0 % | ✓ | 646.87 ±4.72     | 3709.16 ±26.92     | 0.9941 |
| 21F16080        | 24.0 % | ✓ | 636.38 ±6.44     | 3601.14 ±36.34     | 0.9968 |
| 21F16082        | 24.0 % | ✓ | 514.93 ±4.14     | 2995.83 ±23.96     | 0.9950 |
| 21F16083        | 24.0 % | ✓ | 450.71 ±3.29     | 2673.59 ±19.41     | 0.9939 |
| 21F16085        | 24.0 % | ✓ | 711.00 ±7.78     | 4060.48 ±44.30     | 0.9970 |
| 21F16086        | 24.0 % | ✓ | 1166.96 ±14.42   | 6481.93 ±79.94     | 0.9978 |

| Results         | 40(a)/36(a) ± 2σ      | 40(r)/39(k) ± 2σ | Age ± 2σ (Ma)             | MSWD            |
|-----------------|-----------------------|------------------|---------------------------|-----------------|
| Normal Isochron | 287.32 ±12.29         | 5.27399 ±0.02442 | 15.88 ±0.08               | 81.50           |
| Error Chron     | ±4.28%                | ±0.46%           | ±0.51%                    | 0%              |
|                 |                       |                  | Full External Error ±0.83 |                 |
|                 |                       |                  | Analytical Error ±0.07    |                 |
|                 |                       |                  |                           |                 |
| Statistics      | 2σ Confidence Limit   | 1.53             | Convergence               | 0.000052298471  |
|                 | Error Magnification   | 9.0279           | Number of Iterations      | 90              |
|                 | Number of Data Points | 30               | Calculated Line           | Weighted York-2 |

| Inverse Isochron |        |   | 39(k)/40(a+r) ± 2σ   | 36(a)/40(a+r) ± 2σ     | r.i.   |
|------------------|--------|---|----------------------|------------------------|--------|
| 21F16043         | 24.0 % | ✓ | 0.1616205 ±0.0001330 | 0.00050574 ±0.00000347 | 0.0032 |
| 21F16044         | 24.0 % | ✓ | 0.1454132 ±0.0001171 | 0.00080369 ±0.00000424 | 0.0027 |
| 21F16046         | 24.0 % | ✓ | 0.1774113 ±0.0001357 | 0.00021622 ±0.00000108 | 0.0010 |
| 21F16047         | 24.0 % | ✓ | 0.1736963 ±0.0001379 | 0.00028532 ±0.00000201 | 0.0021 |
| 21F16049         | 24.0 % | ✓ | 0.1790909 ±0.0001399 | 0.00021616 ±0.00000175 | 0.0013 |
| 21F16050         | 24.0 % | ✓ | 0.1674533 ±0.0001344 | 0.00043665 ±0.00000286 | 0.0026 |
| 21F16052         | 24.0 % | ✓ | 0.1687772 ±0.0001320 | 0.00038986 ±0.00000222 | 0.0018 |
| 21F16053         | 24.0 % | ✓ | 0.1694610 ±0.0001335 | 0.00037700 ±0.00000235 | 0.0017 |
| 21F16055         | 24.0 % | ✓ | 0.1803374 ±0.0001476 | 0.00017158 ±0.00000211 | 0.0018 |
| 21F16056         | 24.0 % | ✓ | 0.1636279 ±0.0001283 | 0.00047172 ±0.00000263 | 0.0018 |
| 21F16058         | 24.0 % | ✓ | 0.1646597 ±0.0001381 | 0.00047496 ±0.00000352 | 0.0034 |
| 21F16059         | 24.0 % | ✓ | 0.1762288 ±0.0001431 | 0.00024400 ±0.00000244 | 0.0020 |
| 21F16061         | 24.0 % | ✓ | 0.1620768 ±0.0001392 | 0.00050917 ±0.00000427 | 0.0039 |
| 21F16062         | 24.0 % | ✓ | 0.1757444 ±0.0001376 | 0.00023807 ±0.00000183 | 0.0015 |
| 21F16064         | 24.0 % | ✓ | 0.1731742 ±0.0001372 | 0.00028382 ±0.00000205 | 0.0021 |
| 21F16065         | 24.0 % | ✓ | 0.1682366 ±0.0001332 | 0.00040549 ±0.00000235 | 0.0022 |
| 21F16067         | 24.0 % | ✓ | 0.1743817 ±0.0001421 | 0.00029714 ±0.00000270 | 0.0020 |
| 21F16068         | 24.0 % | ✓ | 0.1674679 ±0.0001446 | 0.00038516 ±0.00000377 | 0.0039 |
| 21F16070         | 24.0 % | ✓ | 0.1726882 ±0.0001440 | 0.00029916 ±0.00000294 | 0.0029 |
| 21F16071         | 24.0 % | ✓ | 0.1721478 ±0.0001382 | 0.00031222 ±0.00000248 | 0.0021 |
| 21F16073         | 24.0 % | ✓ | 0.1807148 ±0.0001447 | 0.00016871 ±0.00000176 | 0.0015 |
| 21F16074         | 24.0 % | ✓ | 0.1775501 ±0.0002566 | 0.00022266 ±0.00000895 | 0.0047 |
| 21F16076         | 24.0 % | ✓ | 0.1782301 ±0.0001589 | 0.00020107 ±0.00000330 | 0.0024 |
| 21F16077         | 24.0 % | ✓ | 0.1396402 ±0.0001352 | 0.00086865 ±0.00000668 | 0.0069 |
| 21F16079         | 24.0 % | ✓ | 0.1743966 ±0.0001379 | 0.00026960 ±0.00000196 | 0.0018 |
| 21F16080         | 24.0 % | ✓ | 0.1767162 ±0.0001433 | 0.00027769 ±0.00000280 | 0.0025 |
| 21F16082         | 24.0 % | ✓ | 0.1718827 ±0.0001385 | 0.00033380 ±0.00000267 | 0.0027 |
| 21F16083         | 24.0 % | ✓ | 0.1685787 ±0.0001355 | 0.00037403 ±0.00000272 | 0.0023 |
| 21F16085         | 24.0 % | ✓ | 0.1751016 ±0.0001473 | 0.00024628 ±0.00000269 | 0.0026 |
| 21F16086         | 24.0 % | ✓ | 0.1800334 ±0.0001467 | 0.00015427 ±0.00000190 | 0.0013 |

| Results          | 40(a)/36(a) ± 2σ      | 40(r)/39(k) ± 2σ | Age ± 2σ (Ma)             | MSWD            |
|------------------|-----------------------|------------------|---------------------------|-----------------|
| Inverse Isochron | 289.00 ±12.00         | 5.27242 ±0.02384 | 15.88 ±0.08               | 78.85           |
| Error Chron      | ±4.15%                | ±0.45%           | ±0.50%                    | 0%              |
|                  |                       |                  | Full External Error ±0.83 |                 |
|                  |                       |                  | Analytical Error ±0.07    |                 |
|                  |                       |                  |                           |                 |
| Statistics       | 2σ Confidence Limit   | 1.53             | Convergence               | 0.0003199855    |
|                  | Error Magnification   | 8.8799           | Number of Iterations      | 3               |
|                  | Number of Data Points | 30               | Calculated Line           | Weighted York-2 |
|                  | Spreading Factor      | 21.7%            |                           |                 |

| Degassing Patterns |       | 36Ar(a)<br>[fA] | %1σ       | 36Ar(c)<br>[fA] | %1σ        | 36Ar(ca)<br>[fA] | %1σ       | 36Ar(cl)<br>[fA] | %1σ        | 37Ar(ca)<br>[fA] | %1σ       | 38Ar(a)<br>[fA] | %1σ       | 38Ar(c)<br>[fA] | %1σ        | 38Ar(k)<br>[fA] | %1σ       | 38Ar(ca)<br>[fA] | %1σ        | 38Ar(cl)<br>[fA] | %1σ        | 39Ar(k)<br>[fA] | %1σ      | 39Ar(ca)<br>[fA] | %1σ       | 40Ar(r)<br>[fA] | %1σ        | 40Ar(a)<br>[fA] | %1σ        | 40Ar(c)<br>[fA] | %1σ        | 40Ar(k)<br>[fA] | %1σ       |      |
|--------------------|-------|-----------------|-----------|-----------------|------------|------------------|-----------|------------------|------------|------------------|-----------|-----------------|-----------|-----------------|------------|-----------------|-----------|------------------|------------|------------------|------------|-----------------|----------|------------------|-----------|-----------------|------------|-----------------|------------|-----------------|------------|-----------------|-----------|------|
| 21F16043           | 24.0% | ✓               | 0.3021384 | 0.34            | 0.00000000 | 0.00             | 0.0007108 | 1.51             | 0.00000096 | 12.35            | 2.62949   | 1.50            | 0.0569531 | 0.38            | 0.00000000 | 0.00            | 1.166105  | 0.10             | 0.0004733  | 9.75             | 0.0799261  | 12.38           | 96.5559  | 0.04             | 0.0016894 | 1.76            | 507.217    | 0.06            | 90.2064    | 0.36            | 0.00000000 | 0.00            | 0.0586094 | 9.65 |
| 21F16044           | 24.0% | ✓               | 0.6179091 | 0.26            | 0.00000000 | 0.00             | 0.0010324 | 1.13             | 0.0000119  | 9.66             | 3.81934   | 1.11            | 0.1164759 | 0.31            | 0.00000000 | 0.00            | 1.350199  | 0.10             | 0.0006875  | 9.69             | 0.0990718  | 9.70            | 111.7992 | 0.09             | 184.4829  | 0.28            | 0.00000000 | 0.00            | 0.0678621  | 9.65            |            |                 |           |      |
| 21F16046           | 24.0% | ✓               | 0.6975353 | 0.25            | 0.00000000 | 0.00             | 0.0116911 | 0.31             | 0.0000661  | 3.91             | 43.25225  | 0.26            | 0.1314854 | 0.30            | 0.00000000 | 0.00            | 6.912075  | 0.10             | 0.0077854  | 9.63             | 0.5516270  | 4.02            | 572.3338 | 0.04             | 0.0277896 | 0.96            | 301.7772   | 0.02            | 208.2561   | 0.27            | 0.00000000 | 0.00            | 0.3474066 | 9.65 |
| 21F16047           | 24.0% | ✓               | 0.2414286 | 0.35            | 0.00000000 | 0.00             | 0.0017430 | 0.68             | 0.0000137  | 9.22             | 6.448847  | 0.66            | 0.0455093 | 0.39            | 0.00000000 | 0.00            | 1.775058  | 0.10             | 0.0011607  | 9.65             | 0.1145014  | 9.27            | 146.9784 | 0.04             | 0.0041431 | 1.13            | 774.100    | 0.03            | 72.0809    | 0.37            | 0.00000000 | 0.00            | 0.0892159 | 9.65 |
| 21F16049           | 24.0% | ✓               | 0.2508792 | 0.40            | 0.00000000 | 0.00             | 0.0009385 | 1.07             | 0.0000126  | 10.91            | 3.47194   | 1.06            | 0.0472907 | 0.43            | 0.00000000 | 0.00            | 2.510249  | 0.10             | 0.0006249  | 9.69             | 0.1052110  | 10.95           | 207.8537 | 0.04             | 0.0022307 | 1.40            | 1085.702   | 0.03            | 74.9025    | 0.42            | 0.00000000 | 0.00            | 0.1261672 | 9.65 |
| 21F16050           | 24.0% | ✓               | 0.3075041 | 0.33            | 0.00000000 | 0.00             | 0.0012187 | 0.96             | 0.0000111  | 11.22            | 4.50880   | 0.94            | 0.0579645 | 0.36            | 0.00000000 | 0.00            | 1.424206  | 0.10             | 0.0008116  | 9.68             | 0.0925375  | 11.26           | 117.9272 | 0.04             | 0.0028969 | 1.32            | 612.431    | 0.05            | 91.8084    | 0.34            | 0.00000000 | 0.00            | 0.0715818 | 9.65 |
| 21F16052           | 24.0% | ✓               | 0.4643444 | 0.28            | 0.00000000 | 0.00             | 0.0032627 | 0.46             | 0.0000242  | 6.06             | 12.07062  | 0.42            | 0.0875289 | 0.33            | 0.00000000 | 0.00            | 2.427729  | 0.10             | 0.0021727  | 9.64             | 0.2017005  | 6.13            | 201.0209 | 0.04             | 0.0077554 | 1.01            | 1052.409   | 0.00            | 0.00000000 | 0.00            | 0.1220197  | 9.65            |           |      |
| 21F16053           | 24.0% | ✓               | 0.3763013 | 0.31            | 0.00000000 | 0.00             | 0.0023222 | 0.53             | 0.0000139  | 10.65            | 8.00327   | 0.54            | 0.0709139 | 0.35            | 0.00000000 | 0.00            | 2.042268  | 0.10             | 0.0015454  | 9.65             | 0.1090359  | 10.69           | 169.1040 | 0.04             | 0.0019376 | 0.33            | 112.1397   | 0.33            | 0.00000000 | 0.00            | 0.0231661  | 9.65            |           |      |
| 21F16054           | 24.0% | ✓               | 0.1105553 | 0.62            | 0.00000000 | 0.00             | 0.0010381 | 0.33             | 0.0000146  | 8.19             | 7.11146   | 1.12            | 0.0208758 | 0.64            | 0.00000000 | 0.00            | 1.403313  | 0.10             | 0.0066681  | 9.68             | 0.1219005  | 6.13            | 124.1987 | 0.04             | 0.0023846 | 1.45            | 61.3332    | 0.03            | 0.0705326  | 0.62            | 0.00000000 | 0.00            | 0.0375326 | 9.65 |
| 21F16056           | 24.0% | ✓               | 0.5227480 | 0.28            | 0.00000000 | 0.00             | 0.0037616 | 0.42             | 0.0000153  | 8.66             | 13.91677  | 0.39            | 0.0985380 | 0.32            | 0.00000000 | 0.00            | 2.189895  | 0.10             | 0.0025050  | 9.64             | 0.1276036  | 8.71            | 181.3277 | 0.04             | 0.0089413 | 1.00            | 952.099    | 0.05            | 156.0716   | 0.30            | 0.00000000 | 0.00            | 0.1100659 | 9.65 |
| 21F16058           | 24.0% | ✓               | 0.2471118 | 0.37            | 0.00000000 | 0.00             | 0.0013355 | 0.85             | 0.00000091 | 13.04            | 4.934078  | 0.83            | 0.0465806 | 0.40            | 0.00000000 | 0.00            | 1.034627  | 0.10             | 0.0008593  | 9.67             | 0.0757266  | 13.07           | 85.6692  | 0.04             | 0.0031744 | 1.24            | 446.502    | 0.06            | 73.7777    | 0.39            | 0.00000000 | 0.00            | 0.0520012 | 9.65 |
| 21F16059           | 24.0% | ✓               | 0.1455787 | 0.50            | 0.00000000 | 0.00             | 0.0009337 | 1.18             | 0.00000124 | 10.26            | 3.45426   | 1.17            | 0.0274416 | 0.52            | 0.00000000 | 0.00            | 1.269817  | 0.10             | 0.0006218  | 9.70             | 0.1033129  | 10.30           | 105.1434 | 0.04             | 0.0022194 | 1.49            | 553.166    | 0.04            | 43.4640    | 0.51            | 0.00000000 | 0.00            | 0.0638221 | 9.65 |
| 21F16061           | 24.0% | ✓               | 0.2083282 | 0.42            | 0.00000000 | 0.00             | 0.0003308 | 2.82             | 0.00000075 | 16.24            | 1.22369   | 2.81            | 0.0392699 | 0.45            | 0.00000000 | 0.00            | 0.800872  | 0.10             | 0.0002203  | 10.03            | 0.0624215  | 16.26           | 66.3138  | 0.04             | 0.0007862 | 2.96            | 346.952    | 0.08            | 62.1985    | 0.43            | 0.00000000 | 0.00            | 0.0402525 | 9.65 |
| 21F16062           | 24.0% | ✓               | 0.2631582 | 0.38            | 0.00000000 | 0.00             | 0.0033541 | 0.42             | 0.0000215  | 6.69             | 12.40880  | 0.38            | 0.0496053 | 0.42            | 0.00000000 | 0.00            | 2.346140  | 0.10             | 0.0022336  | 9.64             | 0.1787743  | 6.75            | 194.2652 | 0.04             | 0.0079727 | 1.00            | 1026.816   | 0.03            | 78.5685    | 0.40            | 0.00000000 | 0.00            | 0.1179189 | 9.65 |
| 21F16064           | 24.0% | ✓               | 0.2770543 | 0.36            | 0.00000000 | 0.00             | 0.0021151 | 0.56             | 0.0000159  | 8.44             | 7.82495   | 0.53            | 0.0522447 | 0.40            | 0.00000000 | 0.00            | 2.041535  | 0.10             | 0.0014085  | 9.64             | 0.1321564  | 4.99            | 169.0432 | 0.04             | 0.0050275 | 1.06            | 893.428    | 0.04            | 0.00000000 | 0.00            | 0.1026092  | 9.65            |           |      |
| 21F16065           | 24.0% | ✓               | 0.4194760 | 0.29            | 0.00000000 | 0.00             | 0.0033554 | 0.43             | 0.0000170  | 7.91             | 12.41376  | 0.39            | 0.0790712 | 0.33            | 0.00000000 | 0.00            | 2.101860  | 0.10             | 0.0022345  | 9.64             | 0.14140051 | 7.96            | 174.0382 | 0.04             | 0.0079758 | 1.00            | 909.246    | 0.04            | 125.2388   | 0.31            | 0.00000000 | 0.00            | 0.1056412 | 9.65 |
| 21F16067           | 24.0% | ✓               | 0.1800289 | 0.45            | 0.00000000 | 0.00             | 0.0008629 | 1.31             | 0.00000085 | 13.29            | 3.19254   | 1.30            | 0.0339354 | 0.48            | 0.00000000 | 0.00            | 1.275956  | 0.10             | 0.0005747  | 9.72             | 0.0707513  | 13.32           | 105.6517 | 0.04             | 0.0020512 | 1.59            | 552.115    | 0.05            | 53.7494    | 0.47            | 0.00000000 | 0.00            | 0.0641306 | 9.65 |
| 21F16068           | 24.0% | ✓               | 0.1509648 | 0.49            | 0.00000000 | 0.00             | 0.0016586 | 0.67             | 0.00000033 | 32.82            | 6.13614   | 0.65            | 0.0284535 | 0.51            | 0.00000000 | 0.00            | 0.792641  | 0.10             | 0.0011045  | 9.65             | 0.0275154  | 32.83           | 65.6323  | 0.04             | 0.0039425 | 1.12            | 346.843    | 0.07            | 45.0667    | 0.50            | 0.00000000 | 0.00            | 0.0398388 | 9.65 |
| 21F16070           | 24.0% | ✓               | 0.1567795 | 0.49            | 0.00000000 | 0.00             | 0.0010102 | 1.09             | 0.00000116 | 9.35             | 3.73718   | 1.08            | 0.0295529 | 0.52            | 0.00000000 | 0.00            | 1.092953  | 0.10             | 0.0006727  | 9.69             | 0.0966103  | 9.40            | 90.4987  | 0.04             | 0.0024011 | 1.42            | 477.250    | 0.05            | 46.8081    | 0.50            | 0.00000000 | 0.00            | 0.0549327 | 9.65 |
| 21F16071           | 24.0% | ✓               | 0.2388856 | 0.40            | 0.00000000 | 0.00             | 0.0014197 | 0.80             | 0.00001212 | 10.04            | 5.25250   | 0.78            | 0.0450299 | 0.43            | 0.00000000 | 0.00            | 1.590703  | 0.10             | 0.0009545  | 9.66             | 0.1017334  | 9.08            | 131.7134 | 0.04             | 0.0033747 | 1.21            | 693.796    | 0.04            | 71.3217    | 0.41            | 0.00000000 | 0.00            | 0.0799500 | 9.65 |
| 21F16073           | 24.0% | ✓               | 0.1237300 | 0.52            | 0.00000000 | 0.00             | 0.0008522 | 1.26             | 0.00000136 | 9.51             | 3.15290   | 1.25            | 0.0233231 | 0.55            | 0.00000000 | 0.00            | 1.600615  | 0.10             | 0.0005965  | 9.71             | 0.1135486  | 10.55           | 132.5341 | 0.04             | 0.0020257 | 1.55            | 696.447    | 0.03            | 36.9408    | 0.53            | 0.00000000 | 0.00            | 0.0804482 | 9.65 |
| 21F16074           | 24.0% | ✓               | 0.0233000 | 2.01            | 0.00000000 | 0.00             | 0.0000372 | 27.88            | 0.00000026 | 43.91            | 0.13744   | 27.88           | 0.0043920 | 2.02            | 0.00000000 | 0.00            | 0.224388  | 0.11             | 0.0000247  | 29.50            | 0.0217444  | 43.92           | 18.5798  | 0.07             | 0.0000883 | 27.90           | 97.689     | 0.15            | 6.9564     | 2.01            | 0.00000000 | 0.00            | 0.0112779 | 9.65 |
| 21F16076           | 24.0% | ✓               | 0.0707774 | 0.82            | 0.00000000 | 0.00             | 0.0005579 | 1.81             | 0.00000068 | 17.87            | 0.06389   | 1.80            | 0.0133415 | 0.84            | 0.00000000 | 0.00            | 0.757683  | 0.10             | 0.0003715  | 9.80             | 0.0566419  | 17.89           | 62.7377  | 0.04             | 0.0013261 | 2.02            | 330.872    | 0.05            | 21.1313    | 0.83            | 0.00000000 | 0.00            | 0.0308187 | 9.65 |
| 21F16077           | 24.0% | ✓               | 0.2377380 | 0.38            | 0.00000000 | 0.00             | 0.0013027 | 0.87             | 0.00000057 | 21.18            | 4.81952   | 0.85            | 0.0408138 | 0.42            | 0.00000000 | 0.00            | 0.461505  | 0.10             | 0.00066281 | 9.67             | 0.0400965  | 21.20           | 38.2177  | 0.05             | 0.0030965 | 1.25            | 202.707    | 0.14            | 70.9793    | 0.40            | 0.00000000 | 0.00            | 0.0231981 | 9.65 |
| 21F16079           | 24.0% | ✓               | 0.2582977 | 0.36            | 0.00000000 | 0.00             | 0.0014016 | 0.75             | 0.0000133  | 9.63             | 3.18533   | 0.73            | 0.0481326 | 0.44            | 0.00000000 | 0.00            | 0.994434  | 0.10             | 0.0009334  | 9.66             | 0.1137589  | 9.67            | 155.1432 | 0.04             | 0.0033313 | 1.58            | 870.719    | 0.03            | 76.2237    | 0.38            | 0.00000000 | 0.00            | 0.1002419 | 9.65 |
| 21F16080           | 24.0% | ✓               | 0.1685887 | 0.50            | 0.00000000 | 0.00             | 0.0011861 | 0.91             | 0.00000134 | 9.31             | 4.38794   | 0.90            | 0.0331790 | 0.50            | 0.00000000 | 0.00            | 1.295696  | 0.10             | 0.0007898  | 9.67             | 0.1114324  | 9.20            | 107.2863 | 0.04             | 0.0028193 | 1.29            | 556.777    | 0.05            | 50.3368    | 0.52            | 0.00000000 | 0.00            | 0.0651228 | 9.65 |
| 21F16082           | 24.0% | ✓               | 0.2392545 | 0.40            | 0.00000000 | 0.00             | 0.0037006 | 0.42             | 0.0000137  | 9.14             | 13.69060  | 0.38            | 0.0450995 | 0.43            | 0.00000000 | 0.00            | 1.487881  | 0.10             | 0.0024643  | 9.64             | 0.1139120  | 9.19            | 123.1995 | 0.04             | 0.0087962 | 1.00            | 645.333    | 0.05            | 71.4318    | 0.41            | 0.00000000 | 0.00            | 0.0747821 | 9.65 |
| 21F16083           | 24.0% | ✓               | 0.2552750 | 0.36            | 0.00000000 | 0.00             | 0.0024089 | 0.52             | 0.0000110  | 11.46            | 8.91182   | 0.49            | 0.0481201 | 0.40            | 0.00000000 | 0.00            | 1.389541  | 0.10             | 0.0016604  | 9.64             | 0.0916259  | 11.50           | 115.0568 | 0.04             | 0.0057258 | 1.04            | 606.295    | 0.05            | 76.2161    | 0.38            | 0.00000000 | 0.00            | 0.0698395 | 9.65 |
| 21F16085           | 24.0% | ✓               | 0.1229249 | 0.55            | 0.00000000 | 0.00             | 0.0039115 | 0.41             | 0.0000078  | 14.87            | 14.67091  | 0.37            | 0.0231713 | 0.57            | 0.00000000 | 0.00            | 1.055519  | 0.10             | 0.0026048  | 9.64             | 0.0645613  | 14.90           | 87.3991  | 0.04             | 0.0092976 | 0.99            | 462.433    | 0.04            | 36.7004    | 0.56            | 0.00000000 | 0.00            | 0.0530512 | 9.65 |
| 21F16086           | 24.0% | ✓               | 0.1054725 | 0.62            | 0.00000000 | 0.00             | 0.0015265 | 0.80             | 0.00000139 | 8.65             | 5.647026  | 0.78            | 0.0198816 | 0.64            | 0.00000000 | 0.00            | 1.486469  | 0.10             | 0.0010165  | 9.66             | 0.1151974  | 8.70            | 123.0827 | 0.04             | 0.0036284 | 1.21            | 652.176    | 0.03            | 31.4899    | 0.63            | 0.00000000 | 0.00            | 0.0747112 | 9.65 |
| Σ                  |       |                 | 7.7809558 | 0.07            | 0.00000000 | 0.00             | 0.0609452 | 0.10             | 0.0004133  | 17.25            | 225.47229 | 0.11            | 1.4667102 | 0.08            | 0.00000000 | 0.00            | 49.300850 | 0.02             | 0.004      |                  |            |                 |          |                  |           |                 |            |                 |            |                 |            |                 |           |      |

| Additional Parameters |        |   | 40Ar/39Ar | 1σ       | 37Ar/39Ar | 1σ       | 36Ar/39Ar | 1σ       | Time (days) | 37Ar (decay) | 39Ar (decay) | 40Ar (moles) |
|-----------------------|--------|---|-----------|----------|-----------|----------|-----------|----------|-------------|--------------|--------------|--------------|
| 21F16043              | 24.0 % | ✓ | 6.187833  | 0.002545 | 0.027232  | 0.000408 | 0.003137  | 0.000011 | 73.788      | 4.305609     | 1.00052166   | 2.115E-11    |
| 21F16044              | 24.0 % | ✓ | 6.877411  | 0.002768 | 0.034162  | 0.000381 | 0.005536  | 0.000015 | 73.794      | 4.306200     | 1.00052171   | 2.722E-11    |
| 21F16046              | 24.0 % | ✓ | 5.636953  | 0.002154 | 0.075568  | 0.000198 | 0.001239  | 0.000003 | 73.808      | 4.307382     | 1.00052181   | 1.142E-10    |
| 21F16047              | 24.0 % | ✓ | 5.757620  | 0.002285 | 0.043872  | 0.000288 | 0.001655  | 0.000006 | 73.815      | 4.307972     | 1.00052186   | 2.996E-11    |
| 21F16049              | 24.0 % | ✓ | 5.584303  | 0.002180 | 0.016704  | 0.000177 | 0.001212  | 0.000005 | 73.830      | 4.309213     | 1.00052196   | 4.109E-11    |
| 21F16050              | 24.0 % | ✓ | 5.972274  | 0.002396 | 0.038233  | 0.000360 | 0.002618  | 0.000009 | 73.837      | 4.309805     | 1.00052201   | 2.493E-11    |
| 21F16052              | 24.0 % | ✓ | 5.925351  | 0.002316 | 0.060044  | 0.000255 | 0.002326  | 0.000007 | 73.851      | 4.310987     | 1.00052211   | 4.217E-11    |
| 21F16053              | 24.0 % | ✓ | 5.901476  | 0.002323 | 0.050803  | 0.000275 | 0.002238  | 0.000007 | 73.858      | 4.311578     | 1.00052216   | 3.533E-11    |
| 21F16055              | 24.0 % | ✓ | 5.545655  | 0.002268 | 0.031940  | 0.000357 | 0.000960  | 0.000006 | 73.872      | 4.312761     | 1.00052226   | 2.281E-11    |
| 21F16056              | 24.0 % | ✓ | 6.111732  | 0.002395 | 0.076744  | 0.000298 | 0.002904  | 0.000008 | 73.879      | 4.313412     | 1.00052231   | 3.923E-11    |
| 21F16058              | 24.0 % | ✓ | 6.073514  | 0.002545 | 0.057671  | 0.000481 | 0.002900  | 0.000011 | 73.893      | 4.314596     | 1.00052241   | 1.842E-11    |
| 21F16059              | 24.0 % | ✓ | 5.674930  | 0.002304 | 0.032852  | 0.000385 | 0.001394  | 0.000007 | 73.900      | 4.315188     | 1.00052246   | 2.112E-11    |
| 21F16061              | 24.0 % | ✓ | 6.170446  | 0.002649 | 0.018453  | 0.000519 | 0.003147  | 0.000013 | 73.914      | 4.316371     | 1.00052255   | 1.449E-11    |
| 21F16062              | 24.0 % | ✓ | 5.690454  | 0.002226 | 0.063873  | 0.000246 | 0.001372  | 0.000005 | 73.921      | 4.316964     | 1.00052260   | 3.913E-11    |
| 21F16064              | 24.0 % | ✓ | 5.774968  | 0.002287 | 0.046288  | 0.000247 | 0.001652  | 0.000006 | 73.935      | 4.318207     | 1.00052271   | 3.456E-11    |
| 21F16065              | 24.0 % | ✓ | 5.944344  | 0.002353 | 0.071325  | 0.000281 | 0.002430  | 0.000007 | 73.942      | 4.318800     | 1.00052276   | 3.662E-11    |
| 21F16067              | 24.0 % | ✓ | 5.735042  | 0.002335 | 0.030217  | 0.000394 | 0.001712  | 0.000008 | 73.956      | 4.319985     | 1.00052285   | 2.145E-11    |
| 21F16068              | 24.0 % | ✓ | 5.971543  | 0.002578 | 0.093487  | 0.000606 | 0.002325  | 0.000011 | 73.963      | 4.320577     | 1.00052290   | 1.388E-11    |
| 21F16070              | 24.0 % | ✓ | 5.791237  | 0.002414 | 0.041294  | 0.000445 | 0.001744  | 0.000009 | 73.977      | 4.321763     | 1.00052300   | 1.855E-11    |
| 21F16071              | 24.0 % | ✓ | 5.809419  | 0.002330 | 0.039877  | 0.000312 | 0.001825  | 0.000007 | 73.985      | 4.322415     | 1.00052305   | 2.709E-11    |
| 21F16073              | 24.0 % | ✓ | 5.534103  | 0.002215 | 0.023789  | 0.000298 | 0.000940  | 0.000005 | 73.999      | 4.323601     | 1.00052315   | 2.596E-11    |
| 21F16074              | 24.0 % | ✓ | 5.632792  | 0.004070 | 0.007397  | 0.002063 | 0.001256  | 0.000025 | 74.006      | 4.324194     | 1.00052320   | 3.705E-12    |
| 21F16076              | 24.0 % | ✓ | 5.611212  | 0.002501 | 0.032897  | 0.000591 | 0.001137  | 0.000009 | 74.019      | 4.325380     | 1.00052330   | 1.246E-11    |
| 21F16077              | 24.0 % | ✓ | 7.161289  | 0.003465 | 0.126097  | 0.001077 | 0.006254  | 0.000024 | 74.026      | 4.325974     | 1.00052335   | 9.689E-12    |
| 21F16079              | 24.0 % | ✓ | 5.734547  | 0.002267 | 0.031398  | 0.000231 | 0.001554  | 0.000006 | 74.041      | 4.327220     | 1.00052345   | 3.353E-11    |
| 21F16080              | 24.0 % | ✓ | 5.659251  | 0.002294 | 0.040898  | 0.000368 | 0.001583  | 0.000008 | 74.048      | 4.327813     | 1.00052350   | 2.149E-11    |
| 21F16082              | 24.0 % | ✓ | 5.818112  | 0.002343 | 0.111117  | 0.000427 | 0.001972  | 0.000008 | 74.062      | 4.329001     | 1.00052360   | 2.538E-11    |
| 21F16083              | 24.0 % | ✓ | 5.932258  | 0.002384 | 0.077452  | 0.000384 | 0.002240  | 0.000008 | 74.069      | 4.329595     | 1.00052365   | 2.416E-11    |
| 21F16085              | 24.0 % | ✓ | 5.710971  | 0.002401 | 0.165555  | 0.000623 | 0.001451  | 0.000008 | 74.083      | 4.330783     | 1.00052375   | 1.767E-11    |
| 21F16086              | 24.0 % | ✓ | 5.554968  | 0.002262 | 0.045880  | 0.000359 | 0.000869  | 0.000005 | 74.090      | 4.331377     | 1.00052380   | 2.420E-11    |

| Procedure<br>Blanks |        | 36Ar ± 1σ (SE)<br>[fA] | 37Ar ± 1σ (SE)<br>[fA] | 38Ar ± 1σ (SE)<br>[fA] | 39Ar ± 1σ (SE)<br>[fA] | 40Ar ± 1σ (SE)<br>[fA] |
|---------------------|--------|------------------------|------------------------|------------------------|------------------------|------------------------|
| 21F16043            | 24.0 % | 0.0248109 ±0.0002480   | 0.0155757 ±0.0064985   | 0.0013220 ±0.0059824   | 0.0100610 ±0.0061171   | 6.4373683 ±0.0170472   |
| 21F16044            | 24.0 % | 0.0248109 ±0.0002480   | 0.0155757 ±0.0064985   | 0.0013220 ±0.0059824   | 0.0100610 ±0.0061171   | 6.4373683 ±0.0170472   |
| 21F16046            | 24.0 % | 0.0261629 ±0.0002736   | 0.0105953 ±0.0065289   | 0.0059296 ±0.0064466   | 0.0240101 ±0.0056295   | 6.7038504 ±0.0158334   |
| 21F16047            | 24.0 % | 0.0261629 ±0.0002736   | 0.0105953 ±0.0065289   | 0.0059296 ±0.0064466   | 0.0240101 ±0.0056295   | 6.7038504 ±0.0158334   |
| 21F16049            | 24.0 % | 0.0242328 ±0.0002785   | 0.0158726 ±0.0063863   | 0.0185066 ±0.0060029   | 0.0405977 ±0.0059619   | 6.5829056 ±0.0140250   |
| 21F16050            | 24.0 % | 0.0242328 ±0.0002785   | 0.0158726 ±0.0063863   | 0.0185066 ±0.0060029   | 0.0405977 ±0.0059619   | 6.5829056 ±0.0140250   |
| 21F16052            | 24.0 % | 0.0250242 ±0.0002681   | 0.0099739 ±0.0064289   | 0.0072558 ±0.0067895   | 0.0271810 ±0.0061059   | 6.6232466 ±0.0156330   |
| 21F16053            | 24.0 % | 0.0250242 ±0.0002681   | 0.0099739 ±0.0064289   | 0.0072558 ±0.0067895   | 0.0271810 ±0.0061059   | 6.6232466 ±0.0156330   |
| 21F16055            | 24.0 % | 0.0250556 ±0.0002862   | 0.0090514 ±0.0067136   | 0.0013345 ±0.0056850   | 0.0330117 ±0.0066321   | 6.9422266 ±0.0160274   |
| 21F16056            | 24.0 % | 0.0250556 ±0.0002862   | 0.0090514 ±0.0067136   | 0.0013345 ±0.0056850   | 0.0330117 ±0.0066321   | 6.9422266 ±0.0160274   |
| 21F16058            | 24.0 % | 0.0236281 ±0.0002967   | 0.0128128 ±0.0066570   | 0.0049284 ±0.0069893   | 0.0587778 ±0.0060006   | 6.5211164 ±0.0166045   |
| 21F16059            | 24.0 % | 0.0236281 ±0.0002967   | 0.0128128 ±0.0066570   | 0.0049284 ±0.0069893   | 0.0587778 ±0.0060006   | 6.5211164 ±0.0166045   |
| 21F16061            | 24.0 % | 0.0237544 ±0.0002687   | 0.0141280 ±0.0051112   | 0.0101092 ±0.0070038   | 0.0294037 ±0.0062165   | 6.3616634 ±0.0160964   |
| 21F16062            | 24.0 % | 0.0237544 ±0.0002687   | 0.0141280 ±0.0051112   | 0.0101092 ±0.0070038   | 0.0294037 ±0.0062165   | 6.3616634 ±0.0160964   |
| 21F16064            | 24.0 % | 0.0243342 ±0.0002453   | 0.0043712 ±0.0065052   | 0.0094690 ±0.0063211   | 0.0602146 ±0.0065987   | 6.6634169 ±0.0146654   |
| 21F16065            | 24.0 % | 0.0243342 ±0.0002453   | 0.0043712 ±0.0065052   | 0.0094690 ±0.0063211   | 0.0602146 ±0.0065987   | 6.6634169 ±0.0146654   |
| 21F16067            | 24.0 % | 0.0254155 ±0.0002716   | 0.0067071 ±0.0060493   | 0.0058487 ±0.0053804   | 0.0282056 ±0.0061620   | 6.5965956 ±0.0132137   |
| 21F16068            | 24.0 % | 0.0254155 ±0.0002716   | 0.0067071 ±0.0060493   | 0.0058487 ±0.0053804   | 0.0282056 ±0.0061620   | 6.5965956 ±0.0132137   |
| 21F16070            | 24.0 % | 0.0233486 ±0.0002810   | 0.0038244 ±0.0064503   | 0.0011080 ±0.0063140   | 0.0290426 ±0.0065464   | 6.3074472 ±0.0165039   |
| 21F16071            | 24.0 % | 0.0233486 ±0.0002810   | 0.0038244 ±0.0064503   | 0.0011080 ±0.0063140   | 0.0290426 ±0.0065464   | 6.3074472 ±0.0165039   |
| 21F16073            | 24.0 % | 0.0242664 ±0.0002636   | 0.0128077 ±0.0060350   | 0.0045999 ±0.0069190   | 0.0344165 ±0.0063961   | 6.6223375 ±0.0157273   |
| 21F16074            | 24.0 % | 0.0242664 ±0.0002636   | 0.0128077 ±0.0060350   | 0.0045999 ±0.0069190   | 0.0344165 ±0.0063961   | 6.6223375 ±0.0157273   |
| 21F16076            | 24.0 % | 0.0237327 ±0.0002806   | 0.0087664 ±0.0060774   | 0.0008674 ±0.0072814   | 0.0149165 ±0.0066932   | 6.4593529 ±0.0151561   |
| 21F16077            | 24.0 % | 0.0237327 ±0.0002806   | 0.0087664 ±0.0060774   | 0.0008674 ±0.0072814   | 0.0149165 ±0.0066932   | 6.4593529 ±0.0151561   |
| 21F16079            | 24.0 % | 0.0265814 ±0.0002775   | 0.0136304 ±0.0059038   | 0.0009544 ±0.0067363   | 0.0143263 ±0.0069248   | 6.9177815 ±0.0158139   |
| 21F16080            | 24.0 % | 0.0265814 ±0.0002775   | 0.0136304 ±0.0059038   | 0.0009544 ±0.0067363   | 0.0143263 ±0.0069248   | 6.9177815 ±0.0158139   |
| 21F16082            | 24.0 % | 0.0247965 ±0.0002884   | 0.0101639 ±0.0062152   | 0.0133314 ±0.0068320   | 0.0473879 ±0.0055818   | 6.4847018 ±0.0148029   |
| 21F16083            | 24.0 % | 0.0247965 ±0.0002884   | 0.0101639 ±0.0062152   | 0.0133314 ±0.0068320   | 0.0473879 ±0.0055818   | 6.4847018 ±0.0148029   |
| 21F16085            | 24.0 % | 0.0249134 ±0.0002654   | 0.0139900 ±0.0067753   | 0.0125398 ±0.0063175   | 0.0397597 ±0.0064297   | 6.6984479 ±0.0158295   |
| 21F16086            | 24.0 % | 0.0249134 ±0.0002654   | 0.0139900 ±0.0067753   | 0.0125398 ±0.0063175   | 0.0397597 ±0.0064297   | 6.6984479 ±0.0158295   |

| Intercept Values |        | 36Ar ± 1σ (SE)<br>[fA] | r2     | Regression<br>(type,n) | 37Ar ± 1σ (SE)<br>[fA] | r2     | Regression<br>(type,n) | 38Ar ± 1σ (SE)<br>[fA] | r2     | Regression<br>(type,n) | 39Ar ± 1σ (SE)<br>[fA] | r2     | Regression<br>(type,n) | 40Ar ± 1σ (SE)<br>[fA] | r2     | Regression<br>(type,n) |
|------------------|--------|------------------------|--------|------------------------|------------------------|--------|------------------------|------------------------|--------|------------------------|------------------------|--------|------------------------|------------------------|--------|------------------------|
| 21F16043         | 24.0 % | 0.3100770 ±0.0008388   | 0.8970 | EXP 150 of 150         | 0.6212962 ±0.0061678   | 0.4841 | EXP 150 of 150         | 1.2976683 ±0.0070735   | 0.8186 | EXP 150 of 150         | 96.25447 ±0.01314      | 0.9999 | EXP 148 of 150         | 603.91941 ±0.03595     | 1.0000 | EXP 150 of 150         |
| 21F16044         | 24.0 % | 0.6078103 ±0.0012293   | 0.9585 | EXP 150 of 150         | 0.8952659 ±0.0070356   | 0.5888 | EXP 150 of 150         | 1.5592105 ±0.0063242   | 0.8793 | EXP 150 of 150         | 111.44917 ±0.01327     | 0.9999 | EXP 150 of 150         | 775.34363 ±0.03659     | 1.0000 | EXP 150 of 150         |
| 21F16046         | 24.0 % | 0.6942538 ±0.0012591   | 0.9460 | EXP 150 of 150         | 9.9699496 ±0.0080208   | 0.9931 | EXP 150 of 150         | 7.5555631 ±0.0070638   | 0.9928 | EXP 150 of 150         | 570.52930 ±0.03160     | 1.0000 | EXP 150 of 150         | 3233.07908 ±0.09120    | 1.0000 | EXP 150 of 150         |
| 21F16047         | 24.0 % | 0.2552221 ±0.0006654   | 0.8420 | EXP 150 of 150         | 1.4952291 ±0.0062935   | 0.8153 | EXP 149 of 150         | 1.9197365 ±0.0067157   | 0.8981 | EXP 150 of 150         | 146.52987 ±0.01539     | 0.9999 | EXP 150 of 150         | 852.97367 ±0.04241     | 1.0000 | EXP 150 of 150         |
| 21F16049         | 24.0 % | 0.2614347 ±0.0008402   | 0.7687 | EXP 150 of 150         | 0.8149895 ±0.0051858   | 0.6437 | EXP 146 of 150         | 2.6673512 ±0.0070522   | 0.9419 | EXP 148 of 150         | 207.22235 ±0.01802     | 0.9999 | EXP 150 of 150         | 1167.31320 ±0.04968    | 1.0000 | EXP 150 of 150         |
| 21F16050         | 24.0 % | 0.3150328 ±0.0007902   | 0.9032 | EXP 149 of 150         | 1.0534955 ±0.0069748   | 0.6565 | EXP 150 of 150         | 1.5854307 ±0.0074309   | 0.8375 | EXP 150 of 150         | 117.58815 ±0.01345     | 0.9999 | EXP 148 of 150         | 710.89354 ±0.03768     | 1.0000 | EXP 150 of 150         |
| 21F16052         | 24.0 % | 0.4654915 ±0.0010127   | 0.9324 | EXP 147 of 150         | 2.7870550 ±0.0072948   | 0.9301 | EXP 150 of 150         | 2.7115521 ±0.0074094   | 0.9423 | EXP 150 of 150         | 200.40378 ±0.01777     | 0.9999 | EXP 149 of 150         | 1197.78850 ±0.04918    | 1.0000 | EXP 149 of 150         |
| 21F16053         | 24.0 % | 0.3815723 ±0.0009259   | 0.9136 | EXP 149 of 150         | 1.9862935 ±0.0070987   | 0.8819 | EXP 150 of 150         | 2.2197001 ±0.0076527   | 0.9002 | EXP 150 of 150         | 168.58813 ±0.01647     | 0.9999 | EXP 150 of 150         | 1004.61869 ±0.04182    | 1.0000 | EXP 149 of 150         |
| 21F16055         | 24.0 % | 0.1301481 ±0.0005512   | 0.1220 | EXP 150 of 150         | 0.8625930 ±0.0064451   | 0.5641 | EXP 150 of 150         | 1.5396355 ±0.0071332   | 0.8281 | EXP 150 of 150         | 115.85715 ±0.01529     | 0.9999 | EXP 149 of 150         | 651.35322 ±0.04030     | 1.0000 | EXP 149 of 150         |
| 21F16056         | 24.0 % | 0.5209955 ±0.0011095   | 0.9450 | EXP 150 of 150         | 3.2090077 ±0.0070312   | 0.9490 | EXP 150 of 150         | 2.4066807 ±0.0072457   | 0.9310 | EXP 150 of 150         | 180.78145 ±0.01643     | 0.9999 | EXP 149 of 150         | 1115.22326 ±0.04536    | 1.0000 | EXP 150 of 150         |
| 21F16058         | 24.0 % | 0.2576522 ±0.0007280   | 0.8636 | EXP 149 of 150         | 1.1485841 ±0.0061617   | 0.7408 | EXP 149 of 150         | 1.1465778 ±0.0062667   | 0.7782 | EXP 150 of 150         | 85.45321 ±0.01305      | 0.9998 | EXP 150 of 150         | 526.85331 ±0.03390     | 1.0000 | EXP 150 of 150         |
| 21F16059         | 24.0 % | 0.1616415 ±0.0005811   | 0.5434 | EXP 150 of 150         | 0.8067600 ±0.0062186   | 0.5680 | EXP 150 of 150         | 1.3886202 ±0.0070539   | 0.8193 | EXP 150 of 150         | 104.86333 ±0.01308     | 0.9999 | EXP 150 of 150         | 603.21522 ±0.03331     | 1.0000 | EXP 144 of 150         |
| 21F16061         | 24.0 % | 0.2202998 ±0.0007183   | 0.7924 | EXP 150 of 150         | 0.2953103 ±0.0060022   | 0.1785 | EXP 149 of 150         | 0.8877487 ±0.0068884   | 0.6628 | EXP 150 of 150         | 66.12886 ±0.01077      | 0.9998 | EXP 150 of 150         | 415.55224 ±0.02990     | 0.9999 | EXP 150 of 150         |
| 21F16062         | 24.0 % | 0.2748057 ±0.0008285   | 0.7669 | EXP 150 of 150         | 2.8650614 ±0.0068306   | 0.9386 | EXP 150 of 150         | 2.5525861 ±0.0070878   | 0.9340 | EXP 150 of 150         | 193.67231 ±0.01708     | 0.9999 | EXP 150 of 150         | 1111.86395 ±0.04895    | 1.0000 | EXP 150 of 150         |
| 21F16064         | 24.0 % | 0.2873021 ±0.0008189   | 0.8299 | EXP 150 of 150         | 1.8016443 ±0.0055394   | 0.9086 | EXP 149 of 150         | 2.2246421 ±0.0072144   | 0.9202 | EXP 150 of 150         | 168.56007 ±0.01714     | 0.9999 | EXP 150 of 150         | 982.91175 ±0.05021     | 1.0000 | EXP 150 of 150         |
| 21F16065         | 24.0 % | 0.4226201 ±0.0009397   | 0.9269 | EXP 149 of 150         | 2.8552326 ±0.0060270   | 0.9537 | EXP 150 of 150         | 2.3213570 ±0.0070708   | 0.9279 | EXP 150 of 150         | 173.54178 ±0.01792     | 0.9999 | EXP 150 of 150         | 1041.25396 ±0.04939    | 1.0000 | EXP 150 of 150         |
| 21F16067         | 24.0 % | 0.1958077 ±0.0006723   | 0.6857 | EXP 150 of 150         | 0.7396835 ±0.0071744   | 0.4140 | EXP 150 of 150         | 1.3795305 ±0.0068199   | 0.8209 | EXP 150 of 150         | 105.33922 ±0.01364     | 0.9999 | EXP 150 of 150         | 612.52551 ±0.03343     | 1.0000 | EXP 145 of 150         |
| 21F16068         | 24.0 % | 0.1691594 ±0.0006020   | 0.6567 | EXP 150 of 150         | 1.4153119 ±0.0059231   | 0.8333 | EXP 149 of 150         | 0.8509270 ±0.0068711   | 0.5996 | EXP 149 of 150         | 65.45146 ±0.01079      | 0.9998 | EXP 149 of 150         | 398.54597 ±0.03296     | 0.9999 | EXP 150 of 150         |
| 21F16070         | 24.0 % | 0.1719835 ±0.0006286   | 0.6254 | EXP 149 of 150         | 0.8614923 ±0.0062871   | 0.5962 | EXP 150 of 150         | 1.2142420 ±0.0055958   | 0.8563 | EXP 144 of 150         | 90.23654 ±0.01295      | 0.9998 | EXP 149 of 150         | 530.42087 ±0.03662     | 1.0000 | EXP 150 of 150         |
| 21F16071         | 24.0 % | 0.2497065 ±0.0007765   | 0.7995 | EXP 150 of 150         | 1.2090691 ±0.0062508   | 0.7624 | EXP 150 of 150         | 1.7300351 ±0.0066569   | 0.8766 | EXP 149 of 150         | 131.31847 ±0.01506     | 0.9999 | EXP 149 of 150         | 771.50538 ±0.03999     | 1.0000 | EXP 150 of 150         |
| 21F16073         | 24.0 % | 0.1416247 ±0.0005176   | 0.2029 | EXP 146 of 150         | 0.7360771 ±0.0065272   | 0.5250 | EXP 150 of 150         | 1.7331713 ±0.0069433   | 0.8758 | EXP 150 of 150         | 132.14054 ±0.01497     | 0.9999 | EXP 148 of 150         | 740.09098 ±0.03652     | 1.0000 | EXP 146 of 150         |
| 21F16074         | 24.0 % | 0.0462503 ±0.0003521   | 0.5434 | EXP 150 of 150         | 0.0443327 ±0.0063910   | 0.0016 | EXP 150 of 150         | 0.2537821 ±0.0064690   | 0.1492 | EXP 150 of 150         | 18.55399 ±0.00813      | 0.9984 | EXP 148 of 150         | 111.27883 ±0.02226     | 0.9991 | EXP 149 of 150         |
| 21F16076         | 24.0 % | 0.0909306 ±0.0004588   | 0.0050 | EXP 150 of 150         | 0.4820254 ±0.0058417   | 0.3724 | EXP 149 of 150         | 0.8226528 ±0.0066250   | 0.5877 | EXP 150 of 150         | 62.55035 ±0.01197      | 0.9997 | EXP 150 of 150         | 358.50117 ±0.02874     | 0.9999 | EXP 150 of 150         |
| 21F16077         | 24.0 % | 0.2488940 ±0.0007377   | 0.8775 | EXP 150 of 150         | 1.1137490 ±0.0067025   | 0.6655 | EXP 150 of 150         | 0.5499750 ±0.0064445   | 0.4527 | EXP 148 of 150         | 38.11166 ±0.00839      | 0.9996 | EXP 149 of 150         | 280.16930 ±0.02687     | 0.9999 | EXP 149 of 150         |
| 21F16079         | 24.0 % | 0.2683823 ±0.0007407   | 0.8357 | EXP 149 of 150         | 1.2021408 ±0.0057488   | 0.7919 | EXP 149 of 150         | 2.1464350 ±0.0066341   | 0.9247 | EXP 150 of 150         | 164.62497 ±0.01645     | 0.9999 | EXP 149 of 150         | 953.95825 ±0.04380     | 1.0000 | EXP 150 of 150         |
| 21F16080         | 24.0 % | 0.1865068 ±0.0007110   | 0.5645 | EXP 150 of 150         | 1.0192367 ±0.0064044   | 0.6472 | EXP 149 of 150         | 1.4327972 ±0.0069105   | 0.8382 | EXP 150 of 150         | 106.95527 ±0.01229     | 0.9999 | EXP 150 of 150         | 614.09364 ±0.03948     | 1.0000 | EXP 150 of 150         |
| 21F16082         | 24.0 % | 0.2536516 ±0.0007792   | 0.7966 | EXP 150 of 150         | 3.1468468 ±0.0070098   | 0.9483 | EXP 150 of 150         | 1.6536892 ±0.0065801   | 0.8739 | EXP 149 of 150         | 122.85589 ±0.01447     | 0.9999 | EXP 150 of 150         | 723.32450 ±0.04401     | 1.0000 | EXP 150 of 150         |
| 21F16083         | 24.0 % | 0.2675261 ±0.0007363   | 0.8635 | EXP 150 of 150         | 2.0516897 ±0.0062678   | 0.9085 | EXP 149 of 150         | 1.5358701 ±0.0069103   | 0.8413 | EXP 150 of 150         | 114.73651 ±0.01345     | 0.9999 | EXP 149 of 150         | 689.06523 ±0.03601     | 1.0000 | EXP 147 of 150         |
| 21F16085         | 24.0 % | 0.1443894 ±0.0005432   | 0.4123 | EXP 150 of 150         | 3.3280869 ±0.0067282   | 0.9580 | EXP 148 of 150         | 1.1521445 ±0.0065516   | 0.7842 | EXP 150 of 150         | 87.16449 ±0.01328      | 0.9998 | EXP 150 of 150         | 505.88524 ±0.03511     | 0.9999 | EXP 150 of 150         |
| 21F16086         | 24.0 % | 0.1257100 ±0.0005302   | 0.0560 | EXP 147 of 150         | 1.3071362 ±0.0068378   | 0.7561 | EXP 150 of 150         | 1.6262521 ±0.0064295   | 0.8827 | EXP 150 of 150         | 122.72660 ±0.01639     | 0.9999 | EXP 149 of 150         | 690.43874 ±0.03456     | 1.0000 | EXP 149 of 150         |

| Project Info |        | Analyst     | Irradiation | X-pos | Y-pos | Z/H-pos | Project                | Experiment | Nmb |
|--------------|--------|-------------|-------------|-------|-------|---------|------------------------|------------|-----|
| 21F16043     | 24.0 % | Dan Miggins | 21-OSU-04   | 0.00  | 0.00  | 10.05   | Oregon\Swenton (20-01) | 21F16039   | 01  |
| 21F16044     | 24.0 % | Dan Miggins | 21-OSU-04   | 0.00  | 0.00  | 10.05   | Oregon\Swenton (20-01) | 21F16039   | 01  |
| 21F16046     | 24.0 % | Dan Miggins | 21-OSU-04   | 0.00  | 0.00  | 10.05   | Oregon\Swenton (20-01) | 21F16039   | 01  |
| 21F16047     | 24.0 % | Dan Miggins | 21-OSU-04   | 0.00  | 0.00  | 10.05   | Oregon\Swenton (20-01) | 21F16039   | 01  |
| 21F16049     | 24.0 % | Dan Miggins | 21-OSU-04   | 0.00  | 0.00  | 10.05   | Oregon\Swenton (20-01) | 21F16039   | 01  |
| 21F16050     | 24.0 % | Dan Miggins | 21-OSU-04   | 0.00  | 0.00  | 10.05   | Oregon\Swenton (20-01) | 21F16039   | 01  |
| 21F16052     | 24.0 % | Dan Miggins | 21-OSU-04   | 0.00  | 0.00  | 10.05   | Oregon\Swenton (20-01) | 21F16039   | 01  |
| 21F16053     | 24.0 % | Dan Miggins | 21-OSU-04   | 0.00  | 0.00  | 10.05   | Oregon\Swenton (20-01) | 21F16039   | 01  |
| 21F16055     | 24.0 % | Dan Miggins | 21-OSU-04   | 0.00  | 0.00  | 10.05   | Oregon\Swenton (20-01) | 21F16039   | 01  |
| 21F16056     | 24.0 % | Dan Miggins | 21-OSU-04   | 0.00  | 0.00  | 10.05   | Oregon\Swenton (20-01) | 21F16039   | 01  |
| 21F16058     | 24.0 % | Dan Miggins | 21-OSU-04   | 0.00  | 0.00  | 10.05   | Oregon\Swenton (20-01) | 21F16039   | 01  |
| 21F16059     | 24.0 % | Dan Miggins | 21-OSU-04   | 0.00  | 0.00  | 10.05   | Oregon\Swenton (20-01) | 21F16039   | 01  |
| 21F16061     | 24.0 % | Dan Miggins | 21-OSU-04   | 0.00  | 0.00  | 10.05   | Oregon\Swenton (20-01) | 21F16039   | 01  |
| 21F16062     | 24.0 % | Dan Miggins | 21-OSU-04   | 0.00  | 0.00  | 10.05   | Oregon\Swenton (20-01) | 21F16039   | 01  |
| 21F16064     | 24.0 % | Dan Miggins | 21-OSU-04   | 0.00  | 0.00  | 10.05   | Oregon\Swenton (20-01) | 21F16039   | 01  |
| 21F16065     | 24.0 % | Dan Miggins | 21-OSU-04   | 0.00  | 0.00  | 10.05   | Oregon\Swenton (20-01) | 21F16039   | 01  |
| 21F16067     | 24.0 % | Dan Miggins | 21-OSU-04   | 0.00  | 0.00  | 10.05   | Oregon\Swenton (20-01) | 21F16039   | 01  |
| 21F16068     | 24.0 % | Dan Miggins | 21-OSU-04   | 0.00  | 0.00  | 10.05   | Oregon\Swenton (20-01) | 21F16039   | 01  |
| 21F16070     | 24.0 % | Dan Miggins | 21-OSU-04   | 0.00  | 0.00  | 10.05   | Oregon\Swenton (20-01) | 21F16039   | 01  |
| 21F16071     | 24.0 % | Dan Miggins | 21-OSU-04   | 0.00  | 0.00  | 10.05   | Oregon\Swenton (20-01) | 21F16039   | 01  |
| 21F16073     | 24.0 % | Dan Miggins | 21-OSU-04   | 0.00  | 0.00  | 10.05   | Oregon\Swenton (20-01) | 21F16039   | 01  |
| 21F16074     | 24.0 % | Dan Miggins | 21-OSU-04   | 0.00  | 0.00  | 10.05   | Oregon\Swenton (20-01) | 21F16039   | 01  |
| 21F16076     | 24.0 % | Dan Miggins | 21-OSU-04   | 0.00  | 0.00  | 10.05   | Oregon\Swenton (20-01) | 21F16039   | 01  |
| 21F16077     | 24.0 % | Dan Miggins | 21-OSU-04   | 0.00  | 0.00  | 10.05   | Oregon\Swenton (20-01) | 21F16039   | 01  |
| 21F16079     | 24.0 % | Dan Miggins | 21-OSU-04   | 0.00  | 0.00  | 10.05   | Oregon\Swenton (20-01) | 21F16039   | 01  |
| 21F16080     | 24.0 % | Dan Miggins | 21-OSU-04   | 0.00  | 0.00  | 10.05   | Oregon\Swenton (20-01) | 21F16039   | 01  |
| 21F16082     | 24.0 % | Dan Miggins | 21-OSU-04   | 0.00  | 0.00  | 10.05   | Oregon\Swenton (20-01) | 21F16039   | 01  |
| 21F16083     | 24.0 % | Dan Miggins | 21-OSU-04   | 0.00  | 0.00  | 10.05   | Oregon\Swenton (20-01) | 21F16039   | 01  |
| 21F16085     | 24.0 % | Dan Miggins | 21-OSU-04   | 0.00  | 0.00  | 10.05   | Oregon\Swenton (20-01) | 21F16039   | 01  |
| 21F16086     | 24.0 % | Dan Miggins | 21-OSU-04   | 0.00  | 0.00  | 10.05   | Oregon\Swenton (20-01) | 21F16039   | 01  |



| Sample Parameters |        | Sample   | Material | Location    | Standard Name    | Standard (in Ma) | %1σ   | Standard Reference  | Standard 40Ar/39Ar | %1σ   | J          | %1σ   | Air 40Ar/36Ar | %1σ   | MDF (lin) | %1σ   | Volume Ratio | Sensitivity (mol/volt) | Day | Month | Year | Hour | Min | Resist |
|-------------------|--------|----------|----------|-------------|------------------|------------------|-------|---------------------|--------------------|-------|------------|-------|---------------|-------|-----------|-------|--------------|------------------------|-----|-------|------|------|-----|--------|
| 21F16043          | 24.0 % | VS19-079 | Biotite  | Birch Creek | FCT-NM (4X10-21) | 28.201           | 0.082 | Kuiper et al (2008) | 9.39513            | 0.113 | 0.00165250 | 0.113 | 301.85        | 0.111 | 0.9972716 | 0.038 | 1            | 3.54E-14               | 29  | AUG   | 2021 | 10   | 25  | 1      |
| 21F16044          | 24.0 % | VS19-079 | Biotite  | Birch Creek | FCT-NM (4X10-21) | 28.201           | 0.082 | Kuiper et al (2008) | 9.39513            | 0.113 | 0.00165250 | 0.113 | 301.85        | 0.111 | 0.9972716 | 0.038 | 1            | 3.54E-14               | 29  | AUG   | 2021 | 10   | 35  | 1      |
| 21F16046          | 24.0 % | VS19-079 | Biotite  | Birch Creek | FCT-NM (4X10-21) | 28.201           | 0.082 | Kuiper et al (2008) | 9.39513            | 0.113 | 0.00165250 | 0.113 | 301.85        | 0.111 | 0.9972716 | 0.038 | 1            | 3.54E-14               | 29  | AUG   | 2021 | 10   | 55  | 1      |
| 21F16047          | 24.0 % | VS19-079 | Biotite  | Birch Creek | FCT-NM (4X10-21) | 28.201           | 0.082 | Kuiper et al (2008) | 9.39513            | 0.113 | 0.00165250 | 0.113 | 301.85        | 0.111 | 0.9972716 | 0.038 | 1            | 3.54E-14               | 29  | AUG   | 2021 | 11   | 5   | 1      |
| 21F16049          | 24.0 % | VS19-079 | Biotite  | Birch Creek | FCT-NM (4X10-21) | 28.201           | 0.082 | Kuiper et al (2008) | 9.39513            | 0.113 | 0.00165250 | 0.113 | 301.85        | 0.111 | 0.9972716 | 0.038 | 1            | 3.54E-14               | 29  | AUG   | 2021 | 11   | 26  | 1      |
| 21F16050          | 24.0 % | VS19-079 | Biotite  | Birch Creek | FCT-NM (4X10-21) | 28.201           | 0.082 | Kuiper et al (2008) | 9.39513            | 0.113 | 0.00165250 | 0.113 | 301.85        | 0.111 | 0.9972716 | 0.038 | 1            | 3.54E-14               | 29  | AUG   | 2021 | 11   | 36  | 1      |
| 21F16052          | 24.0 % | VS19-079 | Biotite  | Birch Creek | FCT-NM (4X10-21) | 28.201           | 0.082 | Kuiper et al (2008) | 9.39513            | 0.113 | 0.00165250 | 0.113 | 301.85        | 0.111 | 0.9972716 | 0.038 | 1            | 3.54E-14               | 29  | AUG   | 2021 | 11   | 56  | 1      |
| 21F16053          | 24.0 % | VS19-079 | Biotite  | Birch Creek | FCT-NM (4X10-21) | 28.201           | 0.082 | Kuiper et al (2008) | 9.39513            | 0.113 | 0.00165250 | 0.113 | 301.85        | 0.111 | 0.9972716 | 0.038 | 1            | 3.54E-14               | 29  | AUG   | 2021 | 12   | 6   | 1      |
| 21F16055          | 24.0 % | VS19-079 | Biotite  | Birch Creek | FCT-NM (4X10-21) | 28.201           | 0.082 | Kuiper et al (2008) | 9.39513            | 0.113 | 0.00165250 | 0.113 | 301.85        | 0.111 | 0.9972716 | 0.038 | 1            | 3.54E-14               | 29  | AUG   | 2021 | 12   | 26  | 1      |
| 21F16056          | 24.0 % | VS19-079 | Biotite  | Birch Creek | FCT-NM (4X10-21) | 28.201           | 0.082 | Kuiper et al (2008) | 9.39513            | 0.113 | 0.00165250 | 0.113 | 301.85        | 0.111 | 0.9972716 | 0.038 | 1            | 3.54E-14               | 29  | AUG   | 2021 | 12   | 37  | 1      |
| 21F16058          | 24.0 % | VS19-079 | Biotite  | Birch Creek | FCT-NM (4X10-21) | 28.201           | 0.082 | Kuiper et al (2008) | 9.39513            | 0.113 | 0.00165250 | 0.113 | 301.85        | 0.111 | 0.9972716 | 0.038 | 1            | 3.54E-14               | 29  | AUG   | 2021 | 12   | 57  | 1      |
| 21F16059          | 24.0 % | VS19-079 | Biotite  | Birch Creek | FCT-NM (4X10-21) | 28.201           | 0.082 | Kuiper et al (2008) | 9.39513            | 0.113 | 0.00165250 | 0.113 | 301.85        | 0.111 | 0.9972716 | 0.038 | 1            | 3.54E-14               | 29  | AUG   | 2021 | 13   | 7   | 1      |
| 21F16061          | 24.0 % | VS19-079 | Biotite  | Birch Creek | FCT-NM (4X10-21) | 28.201           | 0.082 | Kuiper et al (2008) | 9.39513            | 0.113 | 0.00165250 | 0.113 | 301.85        | 0.111 | 0.9972716 | 0.038 | 1            | 3.54E-14               | 29  | AUG   | 2021 | 13   | 27  | 1      |
| 21F16062          | 24.0 % | VS19-079 | Biotite  | Birch Creek | FCT-NM (4X10-21) | 28.201           | 0.082 | Kuiper et al (2008) | 9.39513            | 0.113 | 0.00165250 | 0.113 | 301.85        | 0.111 | 0.9972716 | 0.038 | 1            | 3.54E-14               | 29  | AUG   | 2021 | 13   | 37  | 1      |
| 21F16064          | 24.0 % | VS19-079 | Biotite  | Birch Creek | FCT-NM (4X10-21) | 28.201           | 0.082 | Kuiper et al (2008) | 9.39513            | 0.113 | 0.00165250 | 0.113 | 301.85        | 0.111 | 0.9972716 | 0.038 | 1            | 3.54E-14               | 29  | AUG   | 2021 | 13   | 58  | 1      |
| 21F16065          | 24.0 % | VS19-079 | Biotite  | Birch Creek | FCT-NM (4X10-21) | 28.201           | 0.082 | Kuiper et al (2008) | 9.39513            | 0.113 | 0.00165250 | 0.113 | 301.85        | 0.111 | 0.9972716 | 0.038 | 1            | 3.54E-14               | 29  | AUG   | 2021 | 14   | 8   | 1      |
| 21F16067          | 24.0 % | VS19-079 | Biotite  | Birch Creek | FCT-NM (4X10-21) | 28.201           | 0.082 | Kuiper et al (2008) | 9.39513            | 0.113 | 0.00165250 | 0.113 | 301.85        | 0.111 | 0.9972716 | 0.038 | 1            | 3.54E-14               | 29  | AUG   | 2021 | 14   | 28  | 1      |
| 21F16068          | 24.0 % | VS19-079 | Biotite  | Birch Creek | FCT-NM (4X10-21) | 28.201           | 0.082 | Kuiper et al (2008) | 9.39513            | 0.113 | 0.00165250 | 0.113 | 301.85        | 0.111 | 0.9972716 | 0.038 | 1            | 3.54E-14               | 29  | AUG   | 2021 | 14   | 38  | 1      |
| 21F16070          | 24.0 % | VS19-079 | Biotite  | Birch Creek | FCT-NM (4X10-21) | 28.201           | 0.082 | Kuiper et al (2008) | 9.39513            | 0.113 | 0.00165250 | 0.113 | 301.85        | 0.111 | 0.9972716 | 0.038 | 1            | 3.54E-14               | 29  | AUG   | 2021 | 14   | 58  | 1      |
| 21F16071          | 24.0 % | VS19-079 | Biotite  | Birch Creek | FCT-NM (4X10-21) | 28.201           | 0.082 | Kuiper et al (2008) | 9.39513            | 0.113 | 0.00165250 | 0.113 | 301.85        | 0.111 | 0.9972716 | 0.038 | 1            | 3.54E-14               | 29  | AUG   | 2021 | 15   | 9   | 1      |
| 21F16073          | 24.0 % | VS19-079 | Biotite  | Birch Creek | FCT-NM (4X10-21) | 28.201           | 0.082 | Kuiper et al (2008) | 9.39513            | 0.113 | 0.00165250 | 0.113 | 301.85        | 0.111 | 0.9972716 | 0.038 | 1            | 3.54E-14               | 29  | AUG   | 2021 | 15   | 29  | 1      |
| 21F16074          | 24.0 % | VS19-079 | Biotite  | Birch Creek | FCT-NM (4X10-21) | 28.201           | 0.082 | Kuiper et al (2008) | 9.39513            | 0.113 | 0.00165250 | 0.113 | 301.85        | 0.111 | 0.9972716 | 0.038 | 1            | 3.54E-14               | 29  | AUG   | 2021 | 15   | 39  | 1      |
| 21F16076          | 24.0 % | VS19-079 | Biotite  | Birch Creek | FCT-NM (4X10-21) | 28.201           | 0.082 | Kuiper et al (2008) | 9.39513            | 0.113 | 0.00165250 | 0.113 | 301.85        | 0.111 | 0.9972716 | 0.038 | 1            | 3.54E-14               | 29  | AUG   | 2021 | 15   | 59  | 1      |
| 21F16077          | 24.0 % | VS19-079 | Biotite  | Birch Creek | FCT-NM (4X10-21) | 28.201           | 0.082 | Kuiper et al (2008) | 9.39513            | 0.113 | 0.00165250 | 0.113 | 301.85        | 0.111 | 0.9972716 | 0.038 | 1            | 3.54E-14               | 29  | AUG   | 2021 | 16   | 9   | 1      |
| 21F16079          | 24.0 % | VS19-079 | Biotite  | Birch Creek | FCT-NM (4X10-21) | 28.201           | 0.082 | Kuiper et al (2008) | 9.39513            | 0.113 | 0.00165250 | 0.113 | 301.85        | 0.111 | 0.9972716 | 0.038 | 1            | 3.54E-14               | 29  | AUG   | 2021 | 16   | 30  | 1      |
| 21F16080          | 24.0 % | VS19-079 | Biotite  | Birch Creek | FCT-NM (4X10-21) | 28.201           | 0.082 | Kuiper et al (2008) | 9.39513            | 0.113 | 0.00165250 | 0.113 | 301.85        | 0.111 | 0.9972716 | 0.038 | 1            | 3.54E-14               | 29  | AUG   | 2021 | 16   | 40  | 1      |
| 21F16082          | 24.0 % | VS19-079 | Biotite  | Birch Creek | FCT-NM (4X10-21) | 28.201           | 0.082 | Kuiper et al (2008) | 9.39513            | 0.113 | 0.00165250 | 0.113 | 301.85        | 0.111 | 0.9972716 | 0.038 | 1            | 3.54E-14               | 29  | AUG   | 2021 | 17   | 0   | 1      |
| 21F16083          | 24.0 % | VS19-079 | Biotite  | Birch Creek | FCT-NM (4X10-21) | 28.201           | 0.082 | Kuiper et al (2008) | 9.39513            | 0.113 | 0.00165250 | 0.113 | 301.85        | 0.111 | 0.9972716 | 0.038 | 1            | 3.54E-14               | 29  | AUG   | 2021 | 17   | 10  | 1      |
| 21F16085          | 24.0 % | VS19-079 | Biotite  | Birch Creek | FCT-NM (4X10-21) | 28.201           | 0.082 | Kuiper et al (2008) | 9.39513            | 0.113 | 0.00165250 | 0.113 | 301.85        | 0.111 | 0.9972716 | 0.038 | 1            | 3.54E-14               | 29  | AUG   | 2021 | 17   | 30  | 1      |
| 21F16086          | 24.0 % | VS19-079 | Biotite  | Birch Creek | FCT-NM (4X10-21) | 28.201           | 0.082 | Kuiper et al (2008) | 9.39513            | 0.113 | 0.00165250 | 0.113 | 301.85        | 0.111 | 0.9972716 | 0.038 | 1            | 3.54E-14               | 29  | AUG   | 2021 | 17   | 40  | 1      |



21F16039.AGE >>> VS19-079 >>> OREGON | SWENTON (20-01) PROJECT

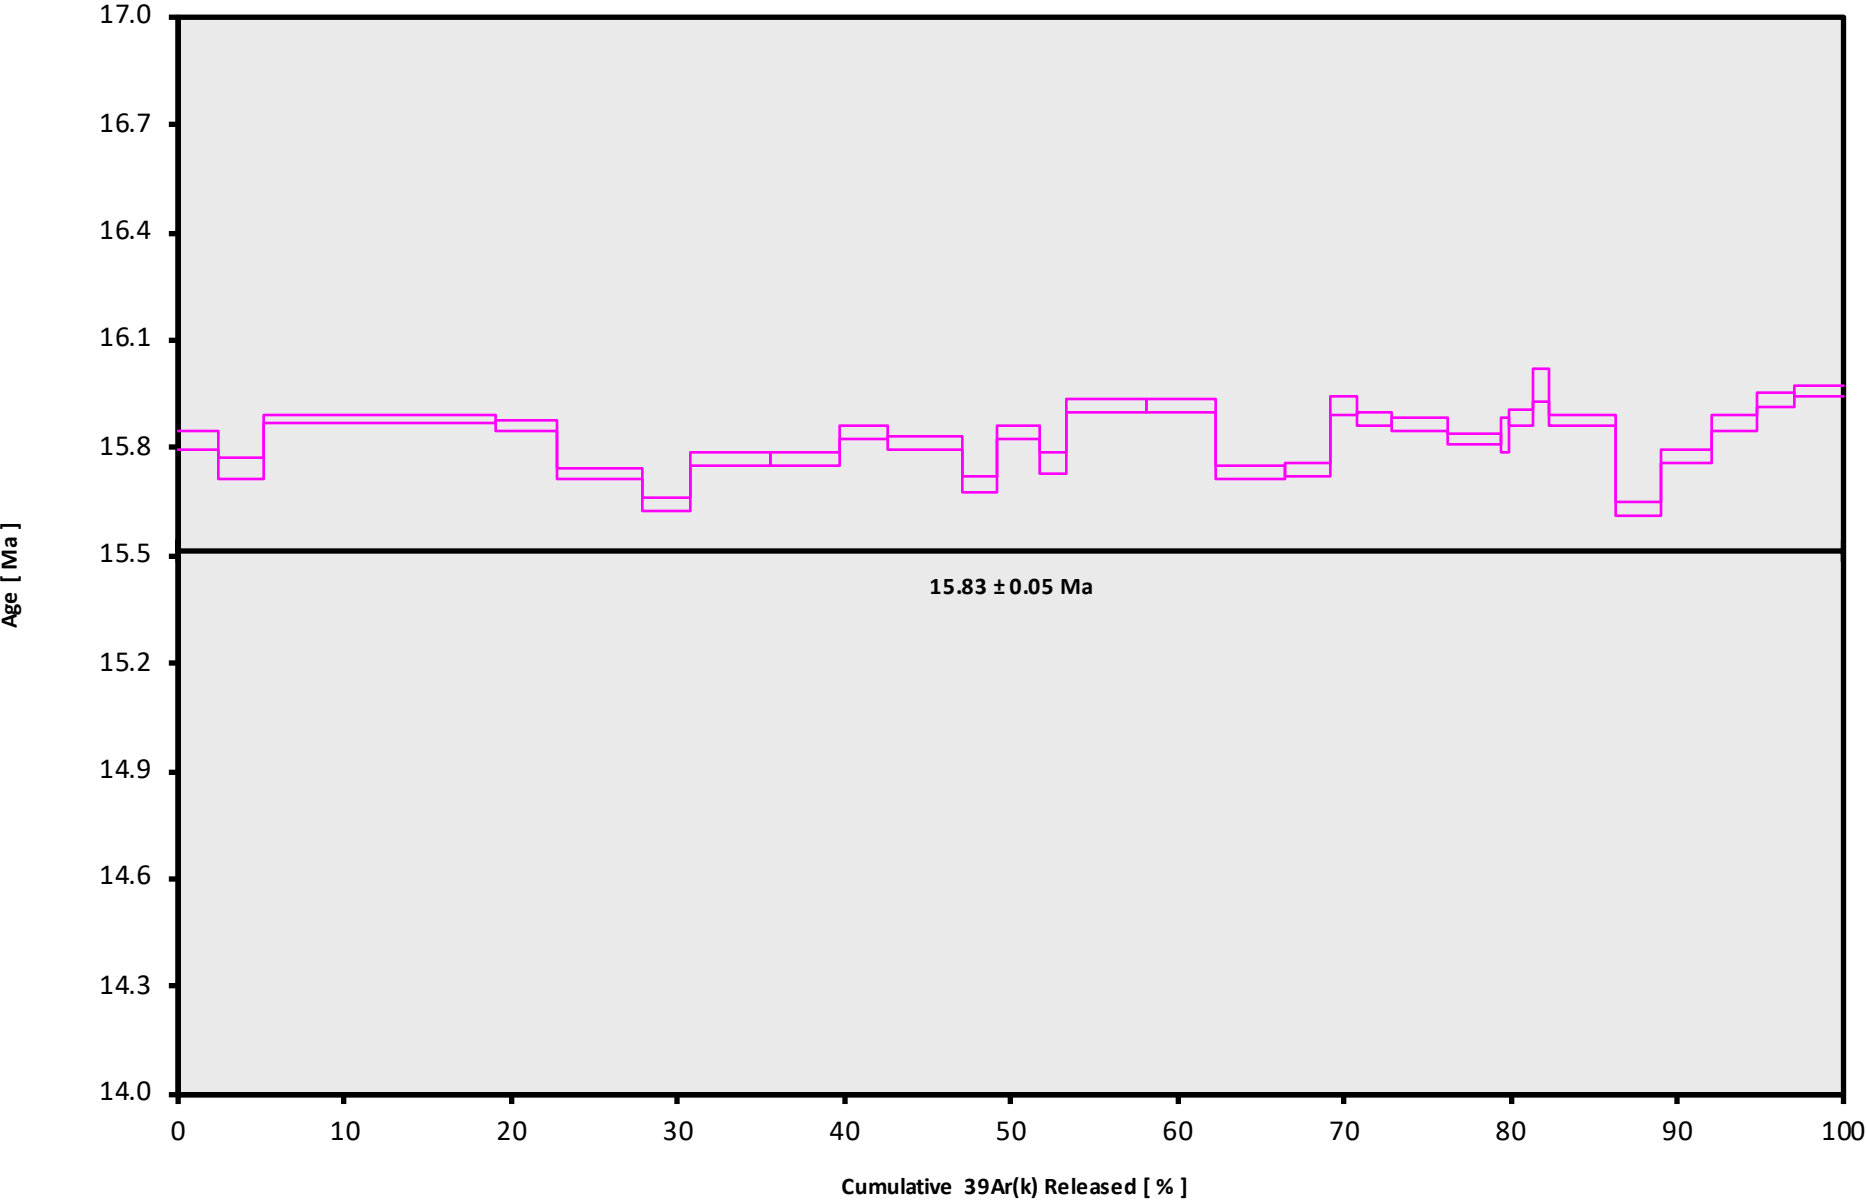

Ar-Ages in Ma

WEIGHTED PLATEAU

15.83 ± 0.05

TOTAL FUSION

15.83 ± 0.04

NORMAL ISOCHRON

15.88 ± 0.08

INVERSE ISOCHRON

15.88 ± 0.08

MSWD (PROBABILITY)

80.21 (0%)

ASSUMED TRAPPED

Sample Info

Biotite

Birch Creek

Dan Miggins

IRR = 21-OSU-04 (4X10<sup>-21</sup>)

21F16039.AGE >>> VS19-079 >>> OREGON | SWENTON (20-01) PROJECT

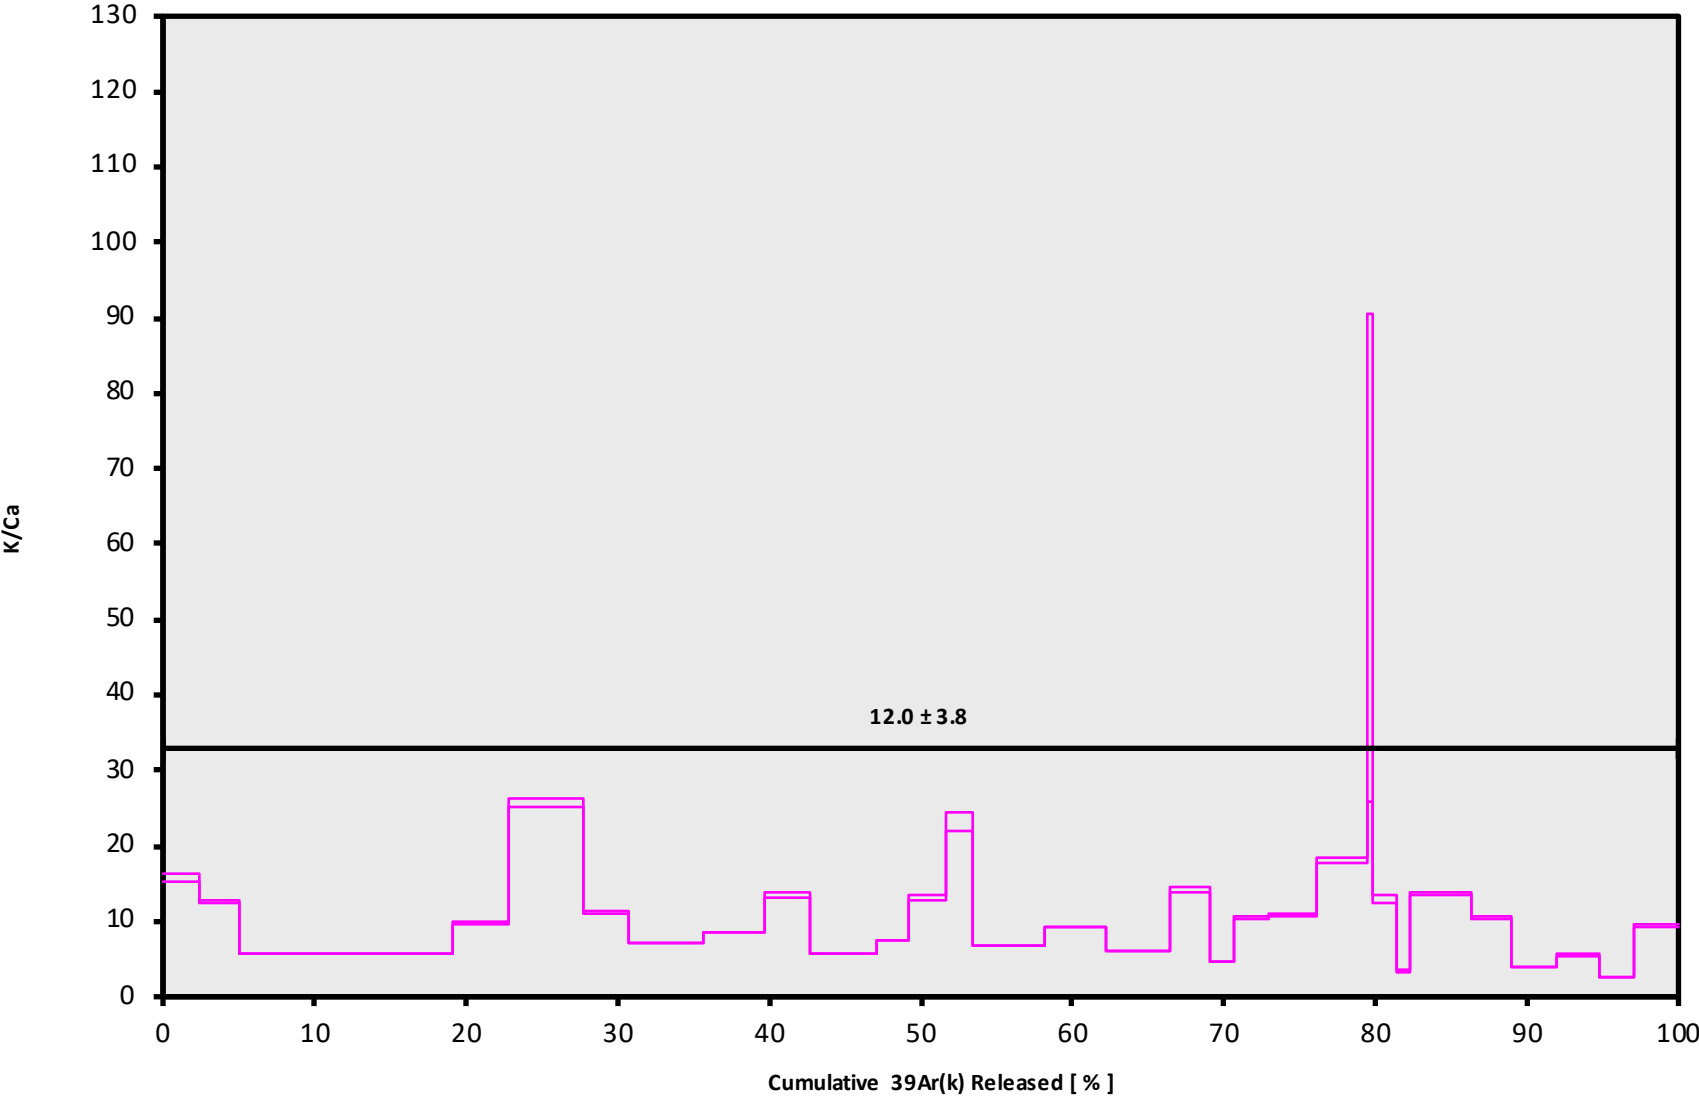

Ar-Ages in Ma

WEIGHTED PLATEAU

$15.83 \pm 0.05$

TOTAL FUSION

$15.83 \pm 0.04$

NORMAL ISOCHRON

$15.88 \pm 0.08$

INVERSE ISOCHRON

$15.88 \pm 0.08$

Sample Info

Biotite

Birch Creek

Dan Miggins

21F16039.AGE >>> VS19-079 >>> OREGON | SWENTON (20-01) PROJECT

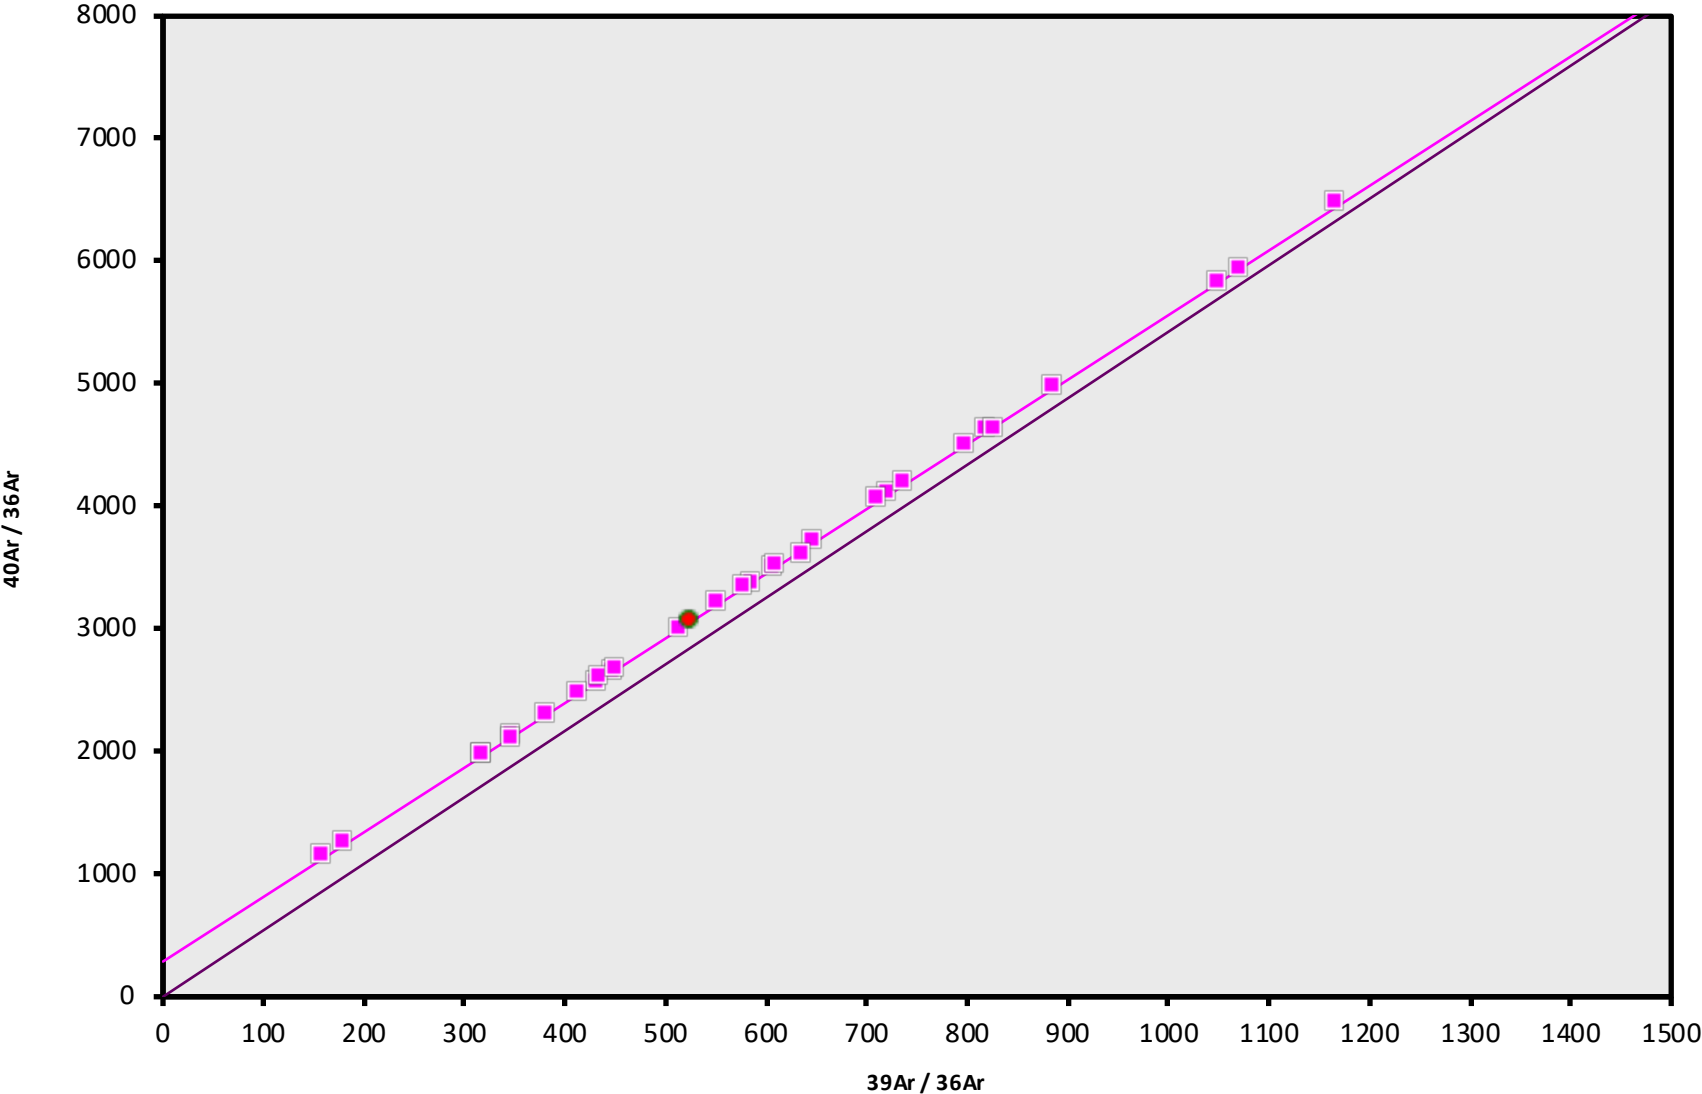

Ar-Ages in Ma

WEIGHTED PLATEAU

$15.83 \pm 0.05$

TOTAL FUSION

$15.83 \pm 0.04$

NORMAL ISOCHRON

$15.88 \pm 0.08$

INVERSE ISOCHRON

$15.88 \pm 0.08$

MSWD (PROBABILITY)

81.50 (0%)

Sample Info

Biotite

Birch Creek

Dan Miggins

21F16039.AGE >>> VS19-079 >>> OREGON | SWENTON (20-01) PROJECT

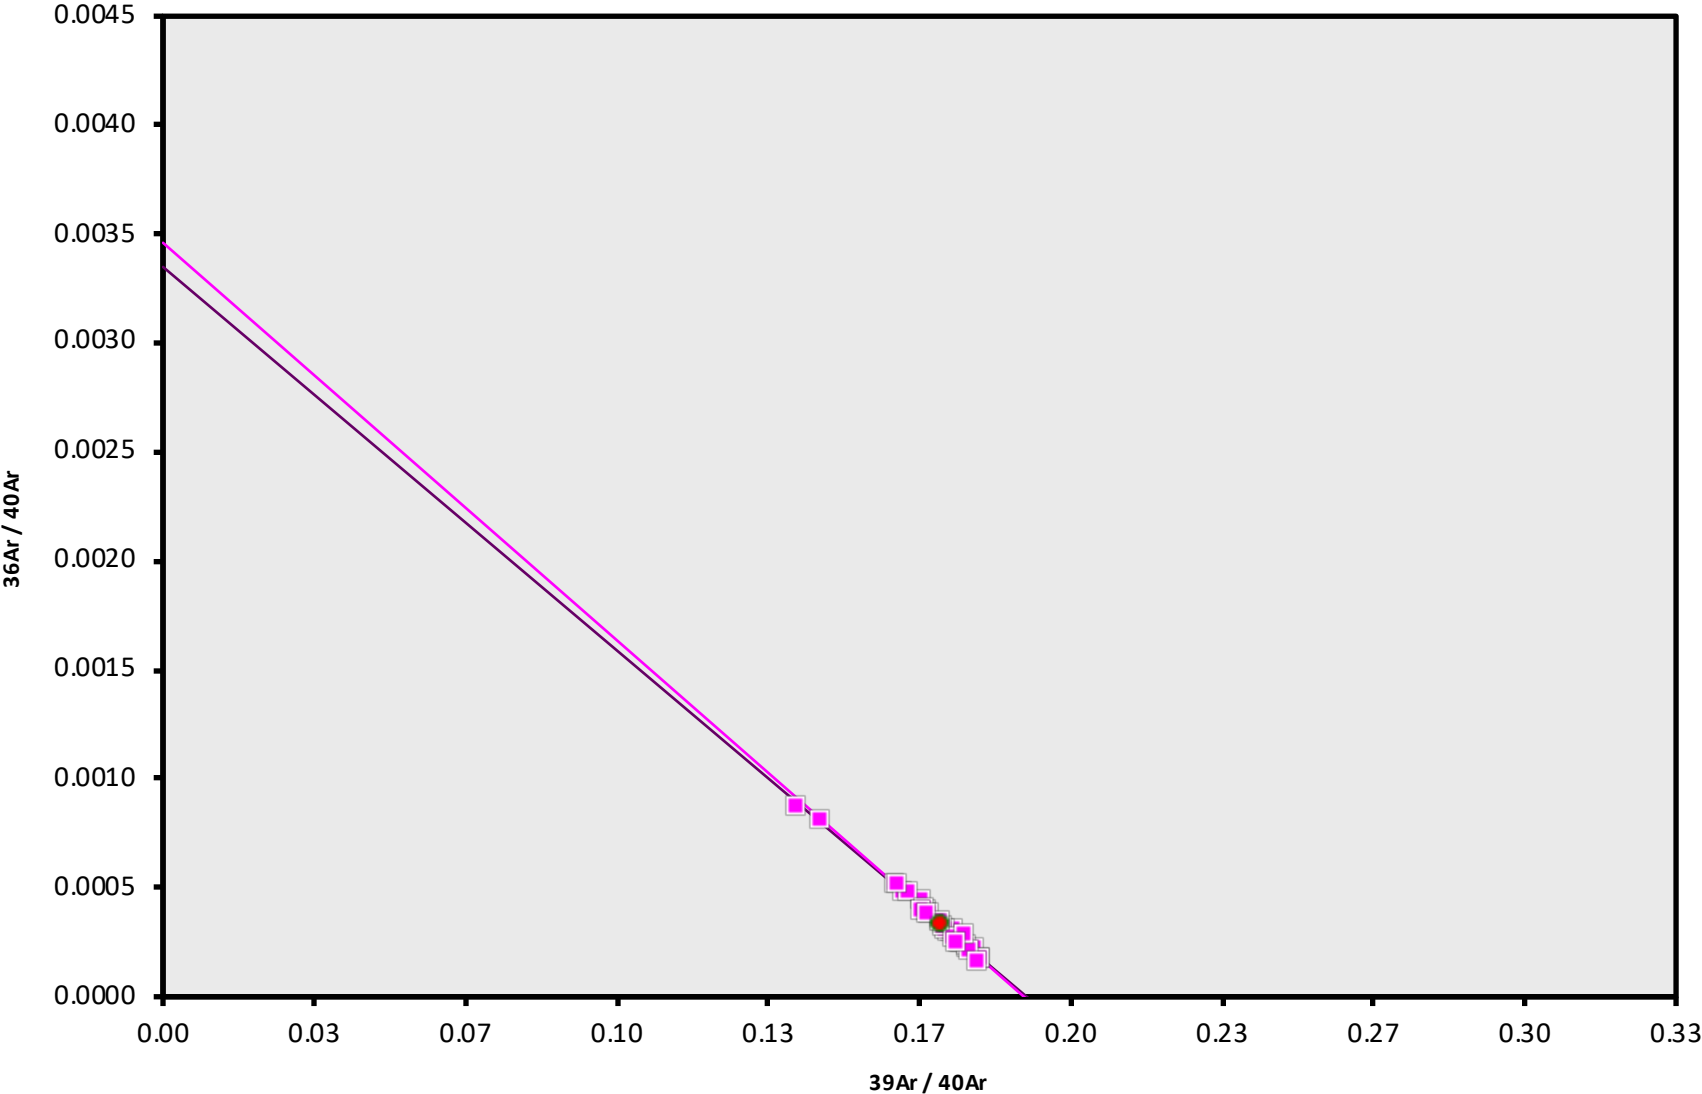

Ar-Ages in Ma

WEIGHTED PLATEAU

$15.83 \pm 0.05$

TOTAL FUSION

$15.83 \pm 0.04$

NORMAL ISOCHRON

$15.88 \pm 0.08$

INVERSE ISOCHRON

$15.88 \pm 0.08$

MSWD (PROBABILITY)

78.85 (0%)

Sample Info

Biotite

Birch Creek

Dan Miggins

| Relative Abundances |        |   | 36Ar<br>[fA] | %1σ   | 37Ar<br>[fA] | %1σ    | 38Ar<br>[fA] | %1σ   | 39Ar<br>[fA] | %1σ   | 40Ar<br>[fA] | %1σ   | 40(r)/39(k) ± 2σ | Age ± 2σ<br>(Ma) | 40Ar(r)<br>(%) | 39Ar(k)<br>(%) | K/Ca ± 2σ    |
|---------------------|--------|---|--------------|-------|--------------|--------|--------------|-------|--------------|-------|--------------|-------|------------------|------------------|----------------|----------------|--------------|
| 21F16452            | 24.0 % | ✓ | 0.3234530    | 0.354 | 0.702143     | 6.268  | 1.019009     | 0.872 | 75.2127      | 0.043 | 365.164      | 0.009 | 3.57131 ±0.01001 | 10.77 ±0.03      | 73.56          | 3.14           | 46.1 ±5.8    |
| 21F16453            | 24.0 % | ✓ | 0.2571236    | 0.378 | 0.329005     | 13.432 | 1.265284     | 0.753 | 98.0182      | 0.042 | 427.059      | 0.008 | 3.57343 ±0.00687 | 10.77 ±0.02      | 82.02          | 4.10           | 128.1 ±34.4  |
| 21F16455            | 24.0 % | ✓ | 0.9551961    | 0.209 | 1.089195     | 3.897  | 1.606515     | 0.618 | 114.1820     | 0.042 | 691.930      | 0.006 | 3.56247 ±0.01207 | 10.74 ±0.04      | 58.79          | 4.77           | 45.1 ±3.5    |
| 21F16456            | 24.0 % | ✓ | 1.0422621    | 0.219 | 4.752525     | 0.897  | 2.849727     | 0.344 | 207.2837     | 0.040 | 1051.759     | 0.005 | 3.57412 ±0.00785 | 10.77 ±0.02      | 70.44          | 8.66           | 18.8 ±0.3    |
| 21F16458            | 24.0 % | ✓ | 0.2975793    | 0.388 | 1.377072     | 3.087  | 0.979181     | 0.989 | 74.7034      | 0.043 | 356.305      | 0.009 | 3.58123 ±0.01007 | 10.80 ±0.03      | 75.08          | 3.12           | 23.3 ±1.4    |
| 21F16459            | 24.0 % | ✓ | 0.2145918    | 0.442 | 0.594267     | 7.147  | 0.760916     | 1.285 | 57.1742      | 0.046 | 267.347      | 0.011 | 3.55569 ±0.01074 | 10.72 ±0.03      | 76.04          | 2.39           | 41.4 ±5.9    |
| 21F16461            | 24.0 % | ✓ | 0.1461244    | 0.518 | 0.753640     | 5.901  | 0.879624     | 0.995 | 66.4470      | 0.044 | 281.081      | 0.011 | 3.57395 ±0.00768 | 10.77 ±0.02      | 84.49          | 2.78           | 37.9 ±4.5    |
| 21F16462            | 24.0 % | ✓ | 0.0988378    | 0.743 | 1.002675     | 4.414  | 0.658995     | 1.238 | 49.4503      | 0.046 | 205.884      | 0.014 | 3.56783 ±0.00961 | 10.75 ±0.03      | 85.69          | 2.07           | 21.2 ±1.9    |
| 21F16464            | 24.0 % | ✓ | 0.1242639    | 0.593 | 0.122736     | 36.122 | 0.483434     | 1.998 | 36.4943      | 0.052 | 165.964      | 0.017 | 3.53075 ±0.01287 | 10.64 ±0.04      | 77.64          | 1.52           | 127.9 ±92.4  |
| 21F16465            | 24.0 % | ✓ | 0.3663458    | 0.312 | 3.030541     | 1.556  | 1.496184     | 0.646 | 112.8317     | 0.041 | 508.895      | 0.007 | 3.54248 ±0.00705 | 10.68 ±0.02      | 78.54          | 4.71           | 16.0 ±0.5    |
| 21F16467            | 24.0 % | ✓ | 0.3569765    | 0.328 | 3.242973     | 1.290  | 1.422102     | 0.617 | 105.7403     | 0.042 | 483.681      | 0.007 | 3.56827 ±0.00758 | 10.76 ±0.02      | 78.01          | 4.42           | 14.0 ±0.4    |
| 21F16468            | 24.0 % | ✓ | 0.2833396    | 0.348 | 3.181934     | 1.362  | 1.519316     | 0.584 | 114.9531     | 0.042 | 495.885      | 0.008 | 3.57962 ±0.00615 | 10.79 ±0.02      | 82.98          | 4.80           | 15.5 ±0.4    |
| 21F16470            | 24.0 % | ✓ | 0.4340836    | 0.286 | 3.941175     | 1.121  | 1.115026     | 0.773 | 82.3016      | 0.043 | 422.086      | 0.009 | 3.55721 ±0.01011 | 10.72 ±0.03      | 69.36          | 3.44           | 9.0 ±0.2     |
| 21F16471            | 24.0 % | ✓ | 0.0730472    | 0.980 | 0.208959     | 21.085 | 0.473043     | 1.954 | 36.1280      | 0.050 | 150.527      | 0.018 | 3.56272 ±0.01251 | 10.74 ±0.04      | 85.51          | 1.51           | 74.3 ±31.4   |
| 21F16473            | 24.0 % | ✓ | 0.1327737    | 0.644 | 0.191858     | 20.798 | 0.740897     | 1.234 | 57.4313      | 0.045 | 244.687      | 0.012 | 3.56996 ±0.00961 | 10.76 ±0.03      | 83.79          | 2.40           | 128.7 ±53.5  |
| 21F16474            | 24.0 % | ✓ | 0.5494369    | 0.271 | 3.407259     | 1.247  | 1.474240     | 0.608 | 106.3628     | 0.042 | 542.819      | 0.007 | 3.56329 ±0.00946 | 10.74 ±0.03      | 69.82          | 4.44           | 13.4 ±0.3    |
| 21F16476            | 24.0 % | ✓ | 0.3217640    | 0.344 | 2.094346     | 2.168  | 1.079258     | 0.874 | 79.8952      | 0.043 | 380.806      | 0.008 | 3.56552 ±0.00919 | 10.75 ±0.03      | 74.81          | 3.34           | 16.4 ±0.7    |
| 21F16477            | 24.0 % | ✓ | 0.1063397    | 0.634 | 0.138780     | 30.825 | 0.255010     | 3.591 | 17.7302      | 0.070 | 94.888       | 0.028 | 3.56120 ±0.02373 | 10.74 ±0.07      | 66.54          | 0.74           | 54.9 ±33.9   |
| 21F16479            | 24.0 % | ✓ | 0.2041106    | 2.811 | 0.377961     | 12.156 | 0.942333     | 0.981 | 69.9214      | 0.048 | 310.580      | 0.011 | 3.57018 ±0.04915 | 10.76 ±0.15      | 80.38          | 2.92           | 79.5 ±19.3   |
| 21F16480            | 24.0 % | ✓ | 0.5816333    | 1.007 | 0.847542     | 4.933  | 1.250251     | 0.738 | 88.2128      | 0.045 | 487.915      | 0.008 | 3.56277 ±0.04000 | 10.74 ±0.12      | 64.41          | 3.69           | 44.8 ±4.4    |
| 21F16482            | 24.0 % | ✓ | 0.1122672    | 0.675 | 0.313286     | 12.885 | 0.782900     | 1.196 | 60.6928      | 0.046 | 249.578      | 0.012 | 3.55973 ±0.00829 | 10.73 ±0.02      | 86.57          | 2.54           | 83.3 ±21.5   |
| 21F16483            | 24.0 % | ✓ | 0.4410105    | 0.285 | 0.100141     | 39.206 | 0.553526     | 1.718 | 37.7585      | 0.051 | 266.578      | 0.011 | 3.57258 ±0.02155 | 10.77 ±0.06      | 50.60          | 1.58           | 162.1 ±127.1 |
| 21F16485            | 24.0 % | ✓ | 0.2032942    | 0.453 | 1.420862     | 3.061  | 1.200338     | 0.768 | 90.7119      | 0.042 | 384.785      | 0.010 | 3.57346 ±0.00696 | 10.77 ±0.02      | 84.24          | 3.79           | 27.5 ±1.7    |
| 21F16486            | 24.0 % | ✓ | 0.3479440    | 0.334 | 0.311763     | 13.926 | 0.930050     | 1.013 | 67.8370      | 0.045 | 344.026      | 0.009 | 3.53981 ±0.01121 | 10.67 ±0.03      | 69.80          | 2.83           | 93.6 ±26.1   |
| 21F16488            | 24.0 % | ✓ | 0.2030495    | 0.444 | 0.546255     | 7.369  | 1.692331     | 0.550 | 132.3159     | 0.041 | 534.263      | 0.007 | 3.57937 ±0.00516 | 10.79 ±0.02      | 88.65          | 5.53           | 104.2 ±15.4  |
| 21F16489            | 24.0 % | ✓ | 0.0947575    | 0.711 | 0.049331     | 83.743 | 0.377772     | 2.433 | 28.3865      | 0.056 | 130.182      | 0.021 | 3.58901 ±0.01500 | 10.82 ±0.05      | 78.26          | 1.19           | 247.4 ±414.4 |
| 21F16491            | 24.0 % | ✓ | 0.5163440    | 0.257 | 0.318279     | 14.277 | 0.606924     | 1.521 | 39.5152      | 0.049 | 295.821      | 0.011 | 3.58509 ±0.02196 | 10.81 ±0.07      | 47.89          | 1.65           | 53.4 ±15.2   |
| 21F16492            | 24.0 % | ✓ | 0.1822501    | 0.444 | 6.121463     | 0.778  | 2.434189     | 0.402 | 188.9093     | 0.041 | 730.187      | 0.006 | 3.57935 ±0.00394 | 10.79 ±0.01      | 92.60          | 7.89           | 13.3 ±0.2    |
| 21F16494            | 24.0 % | ✓ | 0.0487809    | 1.273 | 0.074390     | 56.824 | 0.354514     | 2.460 | 26.8538      | 0.056 | 110.633      | 0.024 | 3.57713 ±0.01456 | 10.78 ±0.04      | 86.83          | 1.12           | 155.2 ±176.4 |
| 21F16495            | 24.0 % | ✓ | 0.1601474    | 0.504 | 0.502772     | 8.913  | 0.931260     | 1.024 | 69.7902      | 0.044 | 296.884      | 0.011 | 3.56886 ±0.00777 | 10.76 ±0.02      | 83.89          | 2.92           | 59.7 ±10.6   |
| Σ                   |        |   | 9.1791281    | 0.110 | 41.145125    | 0.577  | 32.134150    | 0.158 | 2393.2449    | 0.009 | 11278.199    | 0.002 |                  |                  |                |                |              |

| Information on Analysis and Constants Used in Calculations |  |
|------------------------------------------------------------|--|
| Project = SWENTON (20-01)                                  |  |
| Sample = VS19-085                                          |  |
| Material = Biotite                                         |  |
| Location = Circle Bar                                      |  |
| Region = Eastern Oregon                                    |  |
| Analyst = Dan Miggins                                      |  |
| Irradiation = 21-OSU-04 (4X11-21)                          |  |
| Position = X: 0   Y: 0   Z/H: 11.20754 mm                  |  |
| FCT-NM Age = 28.201 ±0.023 Ma                              |  |
| FCT-NM Reference = Kuiper et al (2008)                     |  |
| FCT-NM 40Ar/39Ar Ratio = 9.40011 ±0.01062                  |  |
| FCT-NMJ-value = 0.00165163 ±0.00000187                     |  |
| Air Shot 40Ar/36Ar = 299.9130 ±0.3569                      |  |
| Air Shot MDF = 0.99887072 ±0.00039383 (LIN)                |  |
| Experiment Type = Total Fusion                             |  |
| Extraction Method = Single Crystal Laser Heating           |  |
| Heating = 62 sec                                           |  |
| Isolation = 3.00 min                                       |  |
| Instrument = ARGUS-VI-F                                    |  |
| Preferred Age = Ideogram Age                               |  |
| Age Classification = Eruption Age                          |  |
| IGSN = Undefined                                           |  |
| Rock Class = Undefined                                     |  |
| Lithology = Undefined                                      |  |
| Lat-Lon = Undefined - Undefined                            |  |

| Results          | 40(a)/36(a) ± 2σ | 40(r)/39(k) ± 2σ    | Age ± 2σ<br>(Ma) | M\$WD        | 39Ar(k)<br>(%,n)     | K/Ca ± 2σ  |
|------------------|------------------|---------------------|------------------|--------------|----------------------|------------|
| Age Plateau      |                  | 3.57004 ±0.00434    | 10.76 ±0.03      | 7.52         | 100.00               | 65.2 ±20.8 |
| Error Mean       |                  | ±0.12%              | ±0.26%           | 0%           | 30                   |            |
|                  |                  | Full External Error | ±0.56            | 1.53         | 2σ Confidence Limit  |            |
|                  |                  | Analytical Error    | ±0.01            | 2.7418       | Error Magnification  |            |
| Total Fusion Age |                  | 3.56825 ±0.00266    | 10.76 ±0.03      |              | 30                   | 25.0 ±0.3  |
|                  |                  | ±0.07%              | ±0.24%           |              |                      |            |
|                  |                  | Full External Error | ±0.56            |              |                      |            |
|                  |                  | Analytical Error    | ±0.01            |              |                      |            |
| Normal Isochron  | 296.19 ±2.31     | 3.57686 ±0.00797    | 10.78 ±0.03      | 7.68         | 100.00               |            |
| Error Chron      | ±0.78%           | ±0.22%              | ±0.32%           | 0%           | 30                   |            |
|                  |                  | Full External Error | ±0.56            | 1.53         | 2σ Confidence Limit  |            |
|                  |                  | Analytical Error    | ±0.02            | 2.7705       | Error Magnification  |            |
|                  |                  |                     |                  | 40           | Number of Iterations |            |
|                  |                  |                     |                  | 0.0000354605 | Convergence          |            |
| Inverse Isochron | 296.56 ±2.27     | 3.57574 ±0.00783    | 10.78 ±0.03      | 7.45         | 100.00               |            |
| Error Chron      | ±0.77%           | ±0.22%              | ±0.31%           | 0%           | 30                   |            |
|                  |                  | Full External Error | ±0.56            | 1.53         | 2σ Confidence Limit  |            |
|                  |                  | Analytical Error    | ±0.02            | 2.7291       | Error Magnification  |            |
|                  |                  |                     |                  | 3            | Number of Iterations |            |
|                  |                  |                     |                  | 0.0000175313 | Convergence          |            |
|                  |                  |                     |                  | 45%          | Spreading Factor     |            |

| Incremental Heating |        |   | 36Ar(a)<br>[fA] | 37Ar(ca)<br>[fA] | 38Ar(cl)<br>[fA] | 39Ar(k)<br>[fA] | 40Ar(r)<br>[fA] | Age ± 2σ<br>(Ma) | 40Ar(r)<br>(%) | 39Ar(k)<br>(%) | K/Ca ± 2σ    |
|---------------------|--------|---|-----------------|------------------|------------------|-----------------|-----------------|------------------|----------------|----------------|--------------|
| 21F16452            | 24.0 % | ✓ | 0.3232568       | 0.702143         | 0.0496103        | 75.2122         | 268.6063        | 10.77 ±0.03      | 73.56          | 3.14           | 46.1 ±5.8    |
| 21F16453            | 24.0 % | ✓ | 0.2570304       | 0.329005         | 0.0330123        | 98.0179         | 350.2607        | 10.77 ±0.02      | 82.02          | 4.10           | 128.1 ±34.4  |
| 21F16455            | 24.0 % | ✓ | 0.9548955       | 1.089195         | 0.0473541        | 114.1813        | 406.7668        | 10.74 ±0.04      | 58.79          | 4.77           | 45.1 ±3.5    |
| 21F16456            | 24.0 % | ✓ | 1.0409581       | 4.752525         | 0.1493235        | 207.2806        | 740.8452        | 10.77 ±0.02      | 70.44          | 8.66           | 18.8 ±0.3    |
| 21F16458            | 24.0 % | ✓ | 0.2972044       | 1.377072         | 0.0207284        | 74.7025         | 267.5266        | 10.80 ±0.03      | 75.08          | 3.12           | 23.3 ±1.4    |
| 21F16459            | 24.0 % | ✓ | 0.2144273       | 0.594267         | 0.0299012        | 57.1739         | 203.2925        | 10.72 ±0.03      | 76.04          | 2.39           | 41.4 ±5.9    |
| 21F16461            | 24.0 % | ✓ | 0.1459143       | 0.753640         | 0.0495091        | 66.4465         | 237.4764        | 10.77 ±0.02      | 84.49          | 2.78           | 37.9 ±4.5    |
| 21F16462            | 24.0 % | ✓ | 0.0985611       | 1.002675         | 0.0430326        | 49.4496         | 176.4276        | 10.75 ±0.03      | 85.69          | 2.07           | 21.2 ±1.9    |
| 21F16464            | 24.0 % | ✓ | 0.1242283       | 0.122736         | 0.0192537        | 36.4942         | 128.8521        | 10.64 ±0.04      | 77.64          | 1.52           | 127.9 ±92.4  |
| 21F16465            | 24.0 % | ✓ | 0.3655184       | 3.030541         | 0.0640935        | 112.8297        | 399.6970        | 10.68 ±0.02      | 78.54          | 4.71           | 16.0 ±0.5    |
| 21F16467            | 24.0 % | ✓ | 0.3560898       | 3.242973         | 0.0773948        | 105.7382        | 377.3024        | 10.76 ±0.02      | 78.01          | 4.42           | 14.0 ±0.4    |
| 21F16468            | 24.0 % | ✓ | 0.2824695       | 3.181934         | 0.0772342        | 114.9511        | 411.4815        | 10.79 ±0.02      | 82.98          | 4.80           | 15.5 ±0.4    |
| 21F16470            | 24.0 % | ✓ | 0.4330133       | 3.941175         | 0.0387677        | 82.2991         | 292.7554        | 10.72 ±0.03      | 69.36          | 3.44           | 9.0 ±0.2     |
| 21F16471            | 24.0 % | ✓ | 0.0729878       | 0.208959         | 0.0229313        | 36.1279         | 128.7136        | 10.74 ±0.04      | 85.51          | 1.51           | 74.3 ±31.4   |
| 21F16473            | 24.0 % | ✓ | 0.1327190       | 0.191858         | 0.0222487        | 57.4312         | 205.0272        | 10.76 ±0.03      | 83.79          | 2.40           | 128.7 ±53.5  |
| 21F16474            | 24.0 % | ✓ | 0.5485048       | 3.407259         | 0.0857164        | 106.3606        | 378.9933        | 10.74 ±0.03      | 69.82          | 4.44           | 13.4 ±0.3    |
| 21F16476            | 24.0 % | ✓ | 0.3211909       | 2.094346         | 0.0534591        | 79.8938         | 284.8632        | 10.75 ±0.03      | 74.81          | 3.34           | 16.4 ±0.7    |
| 21F16477            | 24.0 % | ✓ | 0.1062995       | 0.138780         | 0.0208211        | 17.7301         | 63.1405         | 10.74 ±0.07      | 66.54          | 0.74           | 54.9 ±33.9   |
| 21F16479            | 24.0 % | ✓ | 0.2040007       | 0.377961         | 0.0593735        | 69.9211         | 249.6314        | 10.76 ±0.15      | 80.38          | 2.92           | 79.5 ±19.3   |
| 21F16480            | 24.0 % | ✓ | 0.5813945       | 0.847542         | 0.0751665        | 88.2122         | 314.2800        | 10.74 ±0.12      | 64.41          | 3.69           | 44.8 ±4.4    |
| 21F16482            | 24.0 % | ✓ | 0.1121788       | 0.313286         | 0.0287140        | 60.6926         | 216.0490        | 10.73 ±0.02      | 86.57          | 2.54           | 83.3 ±21.5   |
| 21F16483            | 24.0 % | ✓ | 0.4409816       | 0.100141         | 0.0143742        | 37.7585         | 134.8952        | 10.77 ±0.06      | 50.60          | 1.58           | 162.1 ±127.1 |
| 21F16485            | 24.0 % | ✓ | 0.2029016       | 1.420862         | 0.0663185        | 90.7110         | 324.1519        | 10.77 ±0.02      | 84.24          | 3.79           | 27.5 ±1.7    |
| 21F16486            | 24.0 % | ✓ | 0.3478539       | 0.311763         | 0.0451586        | 67.8368         | 240.1297        | 10.67 ±0.03      | 69.80          | 2.83           | 93.6 ±26.1   |
| 21F16488            | 24.0 % | ✓ | 0.2028945       | 0.546255         | 0.0560118        | 132.3156        | 473.6061        | 10.79 ±0.02      | 88.65          | 5.53           | 104.2 ±15.4  |
| 21F16489            | 24.0 % | ✓ | 0.0947419       | 0.049331         | 0.0170809        | 28.3864         | 101.8791        | 10.82 ±0.05      | 78.26          | 1.19           | 247.4 ±414.4 |
| 21F16491            | 24.0 % | ✓ | 0.5162537       | 0.318279         | 0.0323300        | 39.5150         | 141.6647        | 10.81 ±0.07      | 47.89          | 1.65           | 53.4 ±15.2   |
| 21F16492            | 24.0 % | ✓ | 0.1805801       | 6.121463         | 0.1176382        | 188.9053        | 676.1587        | 10.79 ±0.01      | 92.60          | 7.89           | 13.3 ±0.2    |
| 21F16494            | 24.0 % | ✓ | 0.0487581       | 0.074390         | 0.0209974        | 26.8537         | 96.0592         | 10.78 ±0.04      | 86.83          | 1.12           | 155.2 ±176.4 |
| 21F16495            | 24.0 % | ✓ | 0.1600039       | 0.502772         | 0.0581564        | 69.7898         | 249.0704        | 10.76 ±0.02      | 83.89          | 2.92           | 59.7 ±10.6   |
| Σ                   |        |   | 9.1678123       | 41.145125        | 1.4957121        | 2393.2185       | 8539.6038       |                  |                |                |              |

| Information on Analysis                                                                                                                                                                                                                             | Results          | 40(r)/39(k) ± 2σ | Age ± 2σ<br>(Ma)    | MSWD   | 39Ar(k)<br>(%,n)    | K/Ca ± 2σ  |
|-----------------------------------------------------------------------------------------------------------------------------------------------------------------------------------------------------------------------------------------------------|------------------|------------------|---------------------|--------|---------------------|------------|
| Project = SWENTON (20-01)<br>Sample = VS19-085<br>Material = Biotite<br>Location = Circle Bar<br>Region = Eastern Oregon<br>Analyst = Dan Miggins<br>Irradiation = 21-OSU-04 (4X11-21)<br>J = 0.00165163 ± 0.00000187<br>FCT-NM = 28.201 ± 0.023 Ma | Age Plateau      | 3.57004          | ±0.00434            | 7.52   | 100.00              | 65.2 ±20.8 |
|                                                                                                                                                                                                                                                     | Error Mean       |                  | ±0.12%              | 0%     | 30                  |            |
|                                                                                                                                                                                                                                                     |                  |                  | Full External Error | 1.53   | 2σ Confidence Limit |            |
|                                                                                                                                                                                                                                                     |                  |                  | Analytical Error    | 2.7418 | Error Magnification |            |
|                                                                                                                                                                                                                                                     |                  |                  | ±0.01               |        |                     |            |
|                                                                                                                                                                                                                                                     | Total Fusion Age | 3.56825          | ±0.00266            |        | 30                  | 25.0 ±0.3  |
|                                                                                                                                                                                                                                                     |                  |                  | ±0.07%              |        |                     |            |
|                                                                                                                                                                                                                                                     |                  |                  | Full External Error |        |                     |            |
|                                                                                                                                                                                                                                                     |                  |                  | Analytical Error    |        |                     |            |
|                                                                                                                                                                                                                                                     |                  |                  | ±0.01               |        |                     |            |



| Normal Isochron |        |   | 39(k)/36(a) ± 2σ | 40(a+r)/36(a) ± 2σ | r.i.   |
|-----------------|--------|---|------------------|--------------------|--------|
| 21F16452        | 24.0 % | ✓ | 232.67 ±1.66     | 1129.50 ±8.01      | 0.9923 |
| 21F16453        | 24.0 % | ✓ | 381.35 ±2.90     | 1661.28 ±12.56     | 0.9937 |
| 21F16455        | 24.0 % | ✓ | 119.57 ±0.51     | 724.54 ±3.04       | 0.9803 |
| 21F16456        | 24.0 % | ✓ | 199.12 ±0.89     | 1010.26 ±4.44      | 0.9832 |
| 21F16458        | 24.0 % | ✓ | 251.35 ±1.96     | 1198.70 ±9.31      | 0.9936 |
| 21F16459        | 24.0 % | ✓ | 266.64 ±2.37     | 1246.63 ±11.03     | 0.9944 |
| 21F16461        | 24.0 % | ✓ | 455.38 ±4.74     | 1926.07 ±20.00     | 0.9962 |
| 21F16462        | 24.0 % | ✓ | 501.72 ±7.50     | 2088.59 ±31.15     | 0.9979 |
| 21F16464        | 24.0 % | ✓ | 293.77 ±3.50     | 1335.78 ±15.85     | 0.9958 |
| 21F16465        | 24.0 % | ✓ | 308.68 ±1.95     | 1392.07 ±8.70      | 0.9911 |
| 21F16467        | 24.0 % | ✓ | 296.94 ±1.97     | 1358.13 ±8.93      | 0.9917 |
| 21F16468        | 24.0 % | ✓ | 406.95 ±2.86     | 1755.29 ±12.24     | 0.9927 |
| 21F16470        | 24.0 % | ✓ | 190.06 ±1.10     | 974.65 ±5.60       | 0.9886 |
| 21F16471        | 24.0 % | ✓ | 494.99 ±9.73     | 2062.06 ±40.47     | 0.9986 |
| 21F16473        | 24.0 % | ✓ | 432.73 ±5.59     | 1843.38 ±23.74     | 0.9974 |
| 21F16474        | 24.0 % | ✓ | 193.91 ±1.07     | 989.52 ±5.37       | 0.9879 |
| 21F16476        | 24.0 % | ✓ | 248.74 ±1.73     | 1185.46 ±8.16      | 0.9921 |
| 21F16477        | 24.0 % | ✓ | 166.79 ±2.13     | 892.55 ±11.33      | 0.9930 |
| 21F16479        | 24.0 % | ✓ | 342.75 ±19.28    | 1522.24 ±85.62     | 0.9998 |
| 21F16480        | 24.0 % | ✓ | 151.73 ±3.06     | 839.12 ±16.91      | 0.9990 |
| 21F16482        | 24.0 % | ✓ | 541.03 ±7.33     | 2224.50 ±30.06     | 0.9975 |
| 21F16483        | 24.0 % | ✓ | 85.62 ±0.50      | 604.46 ±3.45       | 0.9838 |
| 21F16485        | 24.0 % | ✓ | 447.07 ±4.08     | 1896.14 ±17.23     | 0.9955 |
| 21F16486        | 24.0 % | ✓ | 195.02 ±1.31     | 988.88 ±6.61       | 0.9907 |
| 21F16488        | 24.0 % | ✓ | 652.14 ±5.82     | 2632.81 ±23.40     | 0.9956 |
| 21F16489        | 24.0 % | ✓ | 299.62 ±4.27     | 1373.89 ±19.55     | 0.9965 |
| 21F16491        | 24.0 % | ✓ | 76.54 ±0.40      | 572.97 ±2.95       | 0.9811 |
| 21F16492        | 24.0 % | ✓ | 1046.10 ±9.41    | 4042.93 ±36.21     | 0.9958 |
| 21F16494        | 24.0 % | ✓ | 550.75 ±14.04    | 2268.68 ±57.81     | 0.9988 |
| 21F16495        | 24.0 % | ✓ | 436.18 ±4.42     | 1855.21 ±18.74     | 0.9961 |

| Results         | 40(a)/36(a) ± 2σ      | 40(r)/39(k) ± 2σ | Age ± 2σ (Ma)             | MSWD            |
|-----------------|-----------------------|------------------|---------------------------|-----------------|
| Normal Isochron | 296.19 ±2.31          | 3.57686 ±0.00797 | 10.78 ±0.03               | 7.68            |
| Error Chron     | ±0.78%                | ±0.22%           | ±0.32%                    | 0%              |
|                 |                       |                  | Full External Error ±0.56 |                 |
|                 |                       |                  | Analytical Error ±0.02    |                 |
|                 |                       |                  |                           |                 |
| Statistics      | 2σ Confidence Limit   | 1.53             | Convergence               | 0.000035460515  |
|                 | Error Magnification   | 2.7705           | Number of Iterations      | 40              |
|                 | Number of Data Points | 30               | Calculated Line           | Weighted York-2 |

| Inverse Isochron |        |   | 39(k)/40(a+r) ± 2σ   | 36(a)/40(a+r) ± 2σ     | r.i.   |
|------------------|--------|---|----------------------|------------------------|--------|
| 21F16452         | 24.0 % | ✓ | 0.2059944 ±0.0001827 | 0.00088535 ±0.00000628 | 0.0052 |
| 21F16453         | 24.0 % | ✓ | 0.2295504 ±0.0001959 | 0.00060195 ±0.00000455 | 0.0043 |
| 21F16455         | 24.0 % | ✓ | 0.1650351 ±0.0001394 | 0.00138019 ±0.00000578 | 0.0041 |
| 21F16456         | 24.0 % | ✓ | 0.1971034 ±0.0001605 | 0.00098985 ±0.00000435 | 0.0024 |
| 21F16458         | 24.0 % | ✓ | 0.2096853 ±0.0001845 | 0.00083423 ±0.00000648 | 0.0046 |
| 21F16459         | 24.0 % | ✓ | 0.2138845 ±0.0002018 | 0.00080216 ±0.00000710 | 0.0059 |
| 21F16461         | 24.0 % | ✓ | 0.2364304 ±0.0002144 | 0.00051919 ±0.00000539 | 0.0055 |
| 21F16462         | 24.0 % | ✓ | 0.2402169 ±0.0002299 | 0.00047879 ±0.00000714 | 0.0052 |
| 21F16464         | 24.0 % | ✓ | 0.2199219 ±0.0002397 | 0.00074863 ±0.00000888 | 0.0090 |
| 21F16465         | 24.0 % | ✓ | 0.2217451 ±0.0001866 | 0.00071836 ±0.00000449 | 0.0039 |
| 21F16467         | 24.0 % | ✓ | 0.2186405 ±0.0001859 | 0.00073631 ±0.00000484 | 0.0039 |
| 21F16468         | 24.0 % | ✓ | 0.2318423 ±0.0001963 | 0.00056971 ±0.00000397 | 0.0043 |
| 21F16470         | 24.0 % | ✓ | 0.1950049 ±0.0001707 | 0.00102601 ±0.00000589 | 0.0060 |
| 21F16471         | 24.0 % | ✓ | 0.2400446 ±0.0002536 | 0.00048495 ±0.00000952 | 0.0064 |
| 21F16473         | 24.0 % | ✓ | 0.2347466 ±0.0002183 | 0.00054248 ±0.00000699 | 0.0051 |
| 21F16474         | 24.0 % | ✓ | 0.1959644 ±0.0001671 | 0.00101059 ±0.00000549 | 0.0039 |
| 21F16476         | 24.0 % | ✓ | 0.2098284 ±0.0001826 | 0.00084356 ±0.00000581 | 0.0048 |
| 21F16477         | 24.0 % | ✓ | 0.1868741 ±0.0002813 | 0.00112039 ±0.00001423 | 0.0164 |
| 21F16479         | 24.0 % | ✓ | 0.2251614 ±0.0002214 | 0.00065693 ±0.00003695 | 0.0009 |
| 21F16480         | 24.0 % | ✓ | 0.1808142 ±0.0001644 | 0.00119172 ±0.00002401 | 0.0015 |
| 21F16482         | 24.0 % | ✓ | 0.2432168 ±0.0002320 | 0.00044954 ±0.00000608 | 0.0047 |
| 21F16483         | 24.0 % | ✓ | 0.1416537 ±0.0001472 | 0.00165438 ±0.00000945 | 0.0084 |
| 21F16485         | 24.0 % | ✓ | 0.2357783 ±0.0002038 | 0.00052739 ±0.00000479 | 0.0051 |
| 21F16486         | 24.0 % | ✓ | 0.1972086 ±0.0001804 | 0.00101125 ±0.00000676 | 0.0057 |
| 21F16488         | 24.0 % | ✓ | 0.2476974 ±0.0002082 | 0.00037982 ±0.00000338 | 0.0028 |
| 21F16489         | 24.0 % | ✓ | 0.2180799 ±0.0002604 | 0.00072786 ±0.00001036 | 0.0100 |
| 21F16491         | 24.0 % | ✓ | 0.1335880 ±0.0001353 | 0.00174529 ±0.00000897 | 0.0091 |
| 21F16492         | 24.0 % | ✓ | 0.2587486 ±0.0002120 | 0.00024735 ±0.00000222 | 0.0020 |
| 21F16494         | 24.0 % | ✓ | 0.2427643 ±0.0002968 | 0.00044079 ±0.00001123 | 0.0072 |
| 21F16495         | 24.0 % | ✓ | 0.2351084 ±0.0002109 | 0.00053902 ±0.00000545 | 0.0052 |

| Results          | 40(a)/36(a) ± 2σ      | 40(r)/39(k) ± 2σ | Age ± 2σ (Ma)             | MSWD            |
|------------------|-----------------------|------------------|---------------------------|-----------------|
| Inverse Isochron | 296.56 ±2.27          | 3.57574 ±0.00783 | 10.78 ±0.03               | 7.45            |
| Error Chron      | ±0.77%                | ±0.22%           | ±0.31%                    | 0%              |
|                  |                       |                  | Full External Error ±0.56 |                 |
|                  |                       |                  | Analytical Error ±0.02    |                 |
|                  |                       |                  |                           |                 |
| Statistics       | 2σ Confidence Limit   | 1.53             | Convergence               | 0.0000175313    |
|                  | Error Magnification   | 2.7291           | Number of Iterations      | 3               |
|                  | Number of Data Points | 30               | Calculated Line           | Weighted York-2 |
|                  | Spreading Factor      | 44.8%            |                           |                 |

| Degassing Patterns |        |   | 36Ar(a)<br>[fA] | %1σ  | 36Ar(c)<br>[fA] | %1σ  | 36Ar(ca)<br>[fA] | %1σ   | 36Ar(cl)<br>[fA] | %1σ   | 37Ar(ca)<br>[fA] | %1σ   | 38Ar(c)<br>[fA] | %1σ  | 38Ar(k)<br>[fA] | %1σ  | 38Ar(ca)<br>[fA] | %1σ  | 38Ar(cl)<br>[fA] | %1σ   | 39Ar(k)<br>[fA] | %1σ   | 39Ar(ca)<br>[fA] | %1σ  | 40Ar(r)<br>[fA] | %1σ   | 40Ar(a)<br>[fA] | %1σ  | 40Ar(c)<br>[fA] | %1σ  | 40Ar(k)<br>[fA] | %1σ  |           |      |
|--------------------|--------|---|-----------------|------|-----------------|------|------------------|-------|------------------|-------|------------------|-------|-----------------|------|-----------------|------|------------------|------|------------------|-------|-----------------|-------|------------------|------|-----------------|-------|-----------------|------|-----------------|------|-----------------|------|-----------|------|
| 21F16452           | 24.0 % | ✓ | 0.3232568       | 0.35 | 0.0000000       | 0.00 | 0.0001898        | 6.27  | 0.0000064        | 18.55 | 0.702143         | 6.27  | 0.0609339       | 0.39 | 0.0000000       | 0.00 | 0.908338         | 0.10 | 0.0001264        | 11.49 | 0.0496103       | 18.57 | 75.2122          | 0.04 | 0.0004511       | 6.34  | 268.6063        | 0.13 | 96.5115         | 0.37 | 0.0000000       | 0.00 | 0.0456538 | 9.65 |
| 21F16453           | 24.0 % | ✓ | 0.2570304       | 0.38 | 0.0000000       | 0.00 | 0.0000889        | 13.43 | 0.0000043        | 30.29 | 0.329005         | 13.43 | 0.0484502       | 0.41 | 0.0000000       | 0.00 | 1.183763         | 0.10 | 0.0000592        | 16.53 | 0.0330123       | 30.30 | 98.0179          | 0.04 | 0.0002114       | 13.46 | 350.2607        | 0.09 | 76.7390         | 0.39 | 0.0000000       | 0.00 | 0.0594969 | 9.65 |
| 21F16455           | 24.0 % | ✓ | 0.9548955       | 0.21 | 0.0000000       | 0.00 | 0.0002944        | 3.90  | 0.0000061        | 22.35 | 1.089195         | 3.90  | 0.1799978       | 0.26 | 0.0000000       | 0.00 | 1.378967         | 0.10 | 0.0001961        | 10.39 | 0.0473541       | 22.37 | 114.1813         | 0.04 | 0.0006998       | 4.00  | 406.7668        | 0.16 | 285.0936        | 0.23 | 0.0000000       | 0.00 | 0.0693080 | 9.65 |
| 21F16456           | 24.0 % | ✓ | 1.0409581       | 0.22 | 0.0000000       | 0.00 | 0.0012846        | 0.91  | 0.0000194        | 7.95  | 4.752525         | 0.90  | 0.1962206       | 0.27 | 0.0000000       | 0.00 | 2.503328         | 0.10 | 0.0008555        | 9.67  | 0.1493235       | 8.00  | 207.2806         | 0.04 | 0.0030535       | 1.29  | 740.8452        | 0.10 | 310.7885        | 0.24 | 0.0000000       | 0.00 | 0.1258193 | 9.65 |
| 21F16458           | 24.0 % | ✓ | 0.2972044       | 0.39 | 0.0000000       | 0.00 | 0.0003722        | 3.09  | 0.0000027        | 48.06 | 1.377072         | 3.09  | 0.0560230       | 0.42 | 0.0000000       | 0.00 | 0.902182         | 0.10 | 0.0002479        | 10.11 | 0.0207284       | 48.06 | 74.7025          | 0.04 | 0.0008848       | 3.22  | 267.5266        | 0.13 | 88.7333         | 0.40 | 0.0000000       | 0.00 | 0.0453444 | 9.65 |
| 21F16459           | 24.0 % | ✓ | 0.2144273       | 0.44 | 0.0000000       | 0.00 | 0.0001606        | 7.15  | 0.0000039        | 33.25 | 0.594267         | 7.15  | 0.0404195       | 0.47 | 0.0000000       | 0.00 | 0.690489         | 0.10 | 0.0001070        | 11.99 | 0.0299012       | 33.26 | 57.1739          | 0.05 | 0.0003818       | 7.21  | 203.2925        | 0.14 | 64.0194         | 0.45 | 0.0000000       | 0.00 | 0.0347045 | 9.65 |
| 21F16461           | 24.0 % | ✓ | 0.1459143       | 0.52 | 0.0000000       | 0.00 | 0.0002037        | 5.90  | 0.0000064        | 18.18 | 0.753640         | 5.90  | 0.0275048       | 0.54 | 0.0000000       | 0.00 | 0.802475         | 0.10 | 0.0001357        | 11.29 | 0.0495091       | 18.21 | 66.4465          | 0.04 | 0.0004842       | 5.97  | 237.4764        | 0.10 | 43.5642         | 0.53 | 0.0000000       | 0.00 | 0.0403330 | 9.65 |
| 21F16462           | 24.0 % | ✓ | 0.0985611       | 0.75 | 0.0000000       | 0.00 | 0.0002710        | 4.42  | 0.0000056        | 19.32 | 1.002675         | 4.41  | 0.0185788       | 0.76 | 0.0000000       | 0.00 | 0.597203         | 0.10 | 0.0001805        | 10.59 | 0.0430326       | 19.35 | 49.4496          | 0.05 | 0.0006442       | 4.51  | 176.4276        | 0.13 | 29.4264         | 0.75 | 0.0000000       | 0.00 | 0.0300159 | 9.65 |
| 21F16464           | 24.0 % | ✓ | 0.1242283       | 0.59 | 0.0000000       | 0.00 | 0.0000332        | 36.12 | 0.0000025        | 50.54 | 0.122736         | 36.12 | 0.0234170       | 0.61 | 0.0000000       | 0.00 | 0.440741         | 0.10 | 0.0000221        | 37.38 | 0.0192537       | 50.55 | 36.4942          | 0.05 | 0.0000789       | 36.13 | 128.8521        | 0.17 | 37.0896         | 0.60 | 0.0000000       | 0.00 | 0.0221520 | 9.65 |
| 21F16465           | 24.0 % | ✓ | 0.3655184       | 0.31 | 0.0000000       | 0.00 | 0.0008192        | 1.57  | 0.0000083        | 16.07 | 3.030541         | 1.56  | 0.0689002       | 0.35 | 0.0000000       | 0.00 | 1.362645         | 0.10 | 0.0005455        | 9.75  | 0.0640935       | 16.10 | 112.8297         | 0.04 | 0.0019471       | 1.81  | 399.6970        | 0.09 | 109.1292        | 0.33 | 0.0000000       | 0.00 | 0.0684877 | 9.65 |
| 21F16467           | 24.0 % | ✓ | 0.3560898       | 0.33 | 0.0000000       | 0.00 | 0.0008766        | 1.30  | 0.0000100        | 12.14 | 3.242973         | 1.29  | 0.0671229       | 0.37 | 0.0000000       | 0.00 | 1.277000         | 0.10 | 0.0005837        | 9.72  | 0.0773948       | 12.18 | 105.7382         | 0.04 | 0.0020836       | 1.58  | 377.3024        | 0.10 | 106.3142        | 0.34 | 0.0000000       | 0.00 | 0.0641831 | 9.65 |
| 21F16468           | 24.0 % | ✓ | 0.2824695       | 0.35 | 0.0000000       | 0.00 | 0.0008601        | 1.37  | 0.0000100        | 12.41 | 3.181934         | 1.36  | 0.0532455       | 0.38 | 0.0000000       | 0.00 | 1.388264         | 0.10 | 0.0005727        | 9.73  | 0.0772342       | 12.45 | 114.9511         | 0.04 | 0.0020444       | 1.64  | 411.4815        | 0.08 | 84.3341         | 0.36 | 0.0000000       | 0.00 | 0.0697753 | 9.65 |
| 21F16470           | 24.0 % | ✓ | 0.4330133       | 0.29 | 0.0000000       | 0.00 | 0.0010653        | 1.13  | 0.0000050        | 23.22 | 3.941175         | 1.12  | 0.0816230       | 0.33 | 0.0000000       | 0.00 | 0.993926         | 0.10 | 0.0007094        | 9.70  | 0.0387677       | 23.24 | 82.2991          | 0.04 | 0.0025322       | 1.45  | 292.7554        | 0.14 | 129.2804        | 0.31 | 0.0000000       | 0.00 | 0.0499555 | 9.65 |
| 21F16471           | 24.0 % | ✓ | 0.0729878       | 0.98 | 0.0000000       | 0.00 | 0.0000565        | 21.09 | 0.0000030        | 40.61 | 0.208959         | 21.08 | 0.0137582       | 0.99 | 0.0000000       | 0.00 | 0.436316         | 0.10 | 0.0000376        | 23.18 | 0.0229313       | 40.62 | 36.1279          | 0.05 | 0.0001343       | 21.10 | 128.7136        | 0.17 | 21.7912         | 0.99 | 0.0000000       | 0.00 | 0.0219296 | 9.65 |
| 21F16473           | 24.0 % | ✓ | 0.1327190       | 0.64 | 0.0000000       | 0.00 | 0.0000519        | 20.80 | 0.0000029        | 41.87 | 0.191858         | 20.80 | 0.0250175       | 0.66 | 0.0000000       | 0.00 | 0.693596         | 0.10 | 0.0000345        | 22.92 | 0.0222487       | 41.88 | 57.4312          | 0.04 | 0.0001233       | 20.82 | 205.0272        | 0.13 | 39.6246         | 0.65 | 0.0000000       | 0.00 | 0.0348607 | 9.65 |
| 21F16474           | 24.0 % | ✓ | 0.5485048       | 0.27 | 0.0000000       | 0.00 | 0.0009210        | 1.26  | 0.0000111        | 11.21 | 3.407259         | 1.25  | 0.1033932       | 0.31 | 0.0000000       | 0.00 | 1.284517         | 0.10 | 0.0006133        | 9.71  | 0.0857164       | 11.25 | 106.3606         | 0.04 | 0.0021892       | 1.55  | 378.9933        | 0.13 | 163.7616        | 0.29 | 0.0000000       | 0.00 | 0.0645609 | 9.65 |
| 21F16476           | 24.0 % | ✓ | 0.3211909       | 0.34 | 0.0000000       | 0.00 | 0.0005661        | 2.17  | 0.0000069        | 18.28 | 2.094346         | 2.17  | 0.0605445       | 0.38 | 0.0000000       | 0.00 | 0.964878         | 0.10 | 0.0003770        | 9.87  | 0.0534591       | 18.30 | 79.8938          | 0.04 | 0.0013456       | 2.36  | 284.8632        | 0.12 | 95.8948         | 0.36 | 0.0000000       | 0.00 | 0.0484955 | 9.65 |
| 21F16477           | 24.0 % | ✓ | 0.1062995       | 0.63 | 0.0000000       | 0.00 | 0.0000375        | 30.83 | 0.0000027        | 44.09 | 0.138780         | 30.83 | 0.0200375       | 0.65 | 0.0000000       | 0.00 | 0.214126         | 0.11 | 0.0000250        | 32.29 | 0.0208211       | 44.10 | 17.7301          | 0.07 | 0.0000892       | 30.84 | 63.1405         | 0.33 | 31.7368         | 0.64 | 0.0000000       | 0.00 | 0.0107622 | 9.65 |
| 21F16479           | 24.0 % | ✓ | 0.2040007       | 2.81 | 0.0000000       | 0.00 | 0.0001022        | 12.16 | 0.0000077        | 16.13 | 0.377961         | 12.16 | 0.0384541       | 2.82 | 0.0000000       | 0.00 | 0.844437         | 0.10 | 0.0000680        | 15.51 | 0.0593735       | 16.15 | 69.9211          | 0.05 | 0.0002428       | 12.19 | 249.6314        | 0.69 | 60.9065         | 2.81 | 0.0000000       | 0.00 | 0.0424421 | 9.65 |
| 21F16480           | 24.0 % | ✓ | 0.5813945       | 1.01 | 0.0000000       | 0.00 | 0.0002291        | 4.94  | 0.0000098        | 12.95 | 0.847542         | 4.93  | 0.1095929       | 1.02 | 0.0000000       | 0.00 | 1.065339         | 0.10 | 0.0001526        | 10.82 | 0.0751665       | 12.99 | 88.2122          | 0.04 | 0.0005445       | 5.02  | 314.2800        | 0.56 | 173.5811        | 1.01 | 0.0000000       | 0.00 | 0.0535448 | 9.65 |
| 21F16482           | 24.0 % | ✓ | 0.1121788       | 0.68 | 0.0000000       | 0.00 | 0.0000847        | 12.89 | 0.0000037        | 33.27 | 0.313286         | 12.89 | 0.0211457       | 0.69 | 0.0000000       | 0.00 | 0.732984         | 0.10 | 0.0000564        | 16.09 | 0.0287140       | 33.28 | 60.6926          | 0.05 | 0.0002013       | 12.92 | 216.0490        | 0.11 | 33.4921         | 0.68 | 0.0000000       | 0.00 | 0.0368404 | 9.65 |
| 21F16483           | 24.0 % | ✓ | 0.4409816       | 0.29 | 0.0000000       | 0.00 | 0.0000271        | 39.21 | 0.0000019        | 66.75 | 0.100141         | 39.21 | 0.0831250       | 0.33 | 0.0000000       | 0.00 | 0.456009         | 0.10 | 0.0000180        | 40.37 | 0.0143742       | 66.75 | 37.7585          | 0.05 | 0.0000643       | 39.22 | 134.8952        | 0.30 | 131.6595        | 0.30 | 0.0000000       | 0.00 | 0.0229194 | 9.65 |
| 21F16485           | 24.0 % | ✓ | 0.2029016       | 0.45 | 0.0000000       | 0.00 | 0.0003841        | 3.07  | 0.0000086        | 14.56 | 1.420862         | 3.06  | 0.0382469       | 0.48 | 0.0000000       | 0.00 | 1.095517         | 0.10 | 0.0002558        | 10.10 | 0.0663185       | 14.59 | 90.7110          | 0.04 | 0.0009129       | 3.20  | 324.1519        | 0.09 | 60.5783         | 0.47 | 0.0000000       | 0.00 | 0.0550616 | 9.65 |
| 21F16486           | 24.0 % | ✓ | 0.3478539       | 0.33 | 0.0000000       | 0.00 | 0.0000843        | 13.93 | 0.0000059        | 21.43 | 0.311763         | 13.93 | 0.0655705       | 0.37 | 0.0000000       | 0.00 | 0.819265         | 0.10 | 0.0000561        | 16.93 | 0.0451586       | 21.45 | 67.8368          | 0.04 | 0.0002003       | 13.96 | 240.1297        | 0.15 | 103.8552        | 0.35 | 0.0000000       | 0.00 | 0.0411769 | 9.65 |
| 21F16488           | 24.0 % | ✓ | 0.2028945       | 0.44 | 0.0000000       | 0.00 | 0.0001477        | 7.37  | 0.0000073        | 18.13 | 0.546255         | 7.37  | 0.0382456       | 0.47 | 0.0000000       | 0.00 | 1.597975         | 0.10 | 0.0000983        | 12.13 | 0.0560118       | 18.15 | 132.3156         | 0.04 | 0.0003510       | 7.43  | 473.6061        | 0.06 | 60.5762         | 0.46 | 0.0000000       | 0.00 | 0.0803156 | 9.65 |
| 21F16489           | 24.0 % | ✓ | 0.0947419       | 0.71 | 0.0000000       | 0.00 | 0.0000133        | 83.74 | 0.0000022        | 54.08 | 0.049331         | 83.74 | 0.0178588       | 0.73 | 0.0000000       | 0.00 | 0.342823         | 0.11 | 0.0000089        | 84.29 | 0.0170809       | 54.09 | 28.3864          | 0.06 | 0.0000317       | 83.75 | 101.8791        | 0.20 | 28.2861         | 0.72 | 0.0000000       | 0.00 | 0.0172306 | 9.65 |
| 21F16491           | 24.0 % | ✓ | 0.5162537       | 0.26 | 0.0000000       | 0.00 | 0.0000860        | 14.28 | 0.0000042        | 28.87 | 0.318279         | 14.28 | 0.0973138       | 0.30 | 0.0000000       | 0.00 | 0.477223         | 0.10 | 0.0000573        | 17.22 | 0.0323300       | 28.88 | 39.5150          | 0.05 | 0.0002045       | 14.31 | 141.6647        | 0.30 | 154.1327        | 0.28 | 0.0000000       | 0.00 | 0.0239856 | 9.65 |
| 21F16492           | 24.0 % | ✓ | 0.1805801       | 0.45 | 0.0000000       | 0.00 | 0.0016546        | 0.80  | 0.0000153        | 9.69  | 6.121463         | 0.78  | 0.0340394       | 0.48 | 0.0000000       | 0.00 | 2.281410         | 0.10 | 0.0011019        | 9.66  | 0.1176382       | 9.74  | 188.9053         | 0.04 | 0.0039330       | 1.20  | 676.1587        | 0.04 | 53.9140         | 0.46 | 0.0000000       | 0.00 | 0.1146655 | 9.65 |
| 21F16494           | 24.0 % | ✓ | 0.0487581       | 1.27 | 0.0000000       | 0.00 | 0.0000201        | 56.82 | 0.0000027        | 41.74 | 0.074390         | 56.82 | 0.0091909       | 1.28 | 0.0000000       | 0.00 | 0.324312         | 0.11 | 0.0000134        | 57.63 | 0.0209974       | 41.75 | 26.8537          | 0.06 | 0.0000478       | 56.83 | 96.0592         | 0.20 | 14.5572         | 1.28 | 0.0000000       | 0.00 | 0.0163002 | 9.65 |
| 21F16495           | 24.0 % | ✓ | 0.1600039       | 0.51 | 0.0000000       | 0.00 | 0.0001359        | 8.91  | 0.0000076        | 16.85 | 0.502772         | 8.91  | 0.0301607       | 0.53 | 0.0000000       | 0.00 | 0.842852         | 0.10 | 0.0000095        | 13.12 | 0.0581564       | 16.88 | 69.7898          | 0.04 | 0.0003230       | 8.96  | 249.0704        | 0.10 | 47.7708         | 0.52 | 0.0000000       | 0.00 | 0.0423624 |      |

| Additional Parameters |        |   | 40Ar/39Ar | 1σ       | 37Ar/39Ar | 1σ       | 36Ar/39Ar | 1σ       | Time (days) | 37Ar (decay) | 39Ar (decay) | 40Ar (moles) |
|-----------------------|--------|---|-----------|----------|-----------|----------|-----------|----------|-------------|--------------|--------------|--------------|
| 21F16452              | 24.0 % | ✓ | 4.855079  | 0.002152 | 0.009335  | 0.000585 | 0.004301  | 0.000015 | 79.822      | 4.850602     | 1.00056426   | 1.293E-11    |
| 21F16453              | 24.0 % | ✓ | 4.356940  | 0.001858 | 0.003357  | 0.000451 | 0.002623  | 0.000010 | 79.828      | 4.851267     | 1.00056431   | 1.512E-11    |
| 21F16455              | 24.0 % | ✓ | 6.059887  | 0.002559 | 0.009539  | 0.000372 | 0.008366  | 0.000018 | 79.842      | 4.852598     | 1.00056441   | 2.449E-11    |
| 21F16456              | 24.0 % | ✓ | 5.074010  | 0.002065 | 0.022928  | 0.000206 | 0.005028  | 0.000011 | 79.850      | 4.853331     | 1.00056446   | 3.723E-11    |
| 21F16458              | 24.0 % | ✓ | 4.769602  | 0.002097 | 0.018434  | 0.000569 | 0.003983  | 0.000016 | 79.864      | 4.854662     | 1.00056456   | 1.261E-11    |
| 21F16459              | 24.0 % | ✓ | 4.675997  | 0.002205 | 0.010394  | 0.000743 | 0.003753  | 0.000017 | 79.871      | 4.855328     | 1.00056461   | 9.464E-12    |
| 21F16461              | 24.0 % | ✓ | 4.230150  | 0.001917 | 0.011342  | 0.000669 | 0.002199  | 0.000011 | 79.885      | 4.856660     | 1.00056471   | 9.950E-12    |
| 21F16462              | 24.0 % | ✓ | 4.163458  | 0.001992 | 0.020276  | 0.000895 | 0.001999  | 0.000015 | 79.892      | 4.857327     | 1.00056476   | 7.288E-12    |
| 21F16464              | 24.0 % | ✓ | 4.547665  | 0.002478 | 0.003363  | 0.001215 | 0.003405  | 0.000020 | 79.906      | 4.858659     | 1.00056486   | 5.875E-12    |
| 21F16465              | 24.0 % | ✓ | 4.510211  | 0.001897 | 0.026859  | 0.000418 | 0.003247  | 0.000010 | 79.913      | 4.859326     | 1.00056490   | 1.801E-11    |
| 21F16467              | 24.0 % | ✓ | 4.574234  | 0.001944 | 0.030669  | 0.000396 | 0.003376  | 0.000011 | 79.927      | 4.860726     | 1.00056501   | 1.712E-11    |
| 21F16468              | 24.0 % | ✓ | 4.313806  | 0.001825 | 0.027680  | 0.000377 | 0.002465  | 0.000009 | 79.934      | 4.861392     | 1.00056506   | 1.755E-11    |
| 21F16470              | 24.0 % | ✓ | 5.128525  | 0.002243 | 0.047887  | 0.000537 | 0.005274  | 0.000015 | 79.948      | 4.862726     | 1.00056515   | 1.494E-11    |
| 21F16471              | 24.0 % | ✓ | 4.166484  | 0.002200 | 0.005784  | 0.001220 | 0.002022  | 0.000020 | 79.955      | 4.863393     | 1.00056520   | 5.329E-12    |
| 21F16473              | 24.0 % | ✓ | 4.260510  | 0.001980 | 0.003341  | 0.000695 | 0.002312  | 0.000015 | 79.969      | 4.864728     | 1.00056530   | 8.662E-12    |
| 21F16474              | 24.0 % | ✓ | 5.103471  | 0.002175 | 0.032034  | 0.000400 | 0.005166  | 0.000014 | 79.976      | 4.865395     | 1.00056535   | 1.922E-11    |
| 21F16476              | 24.0 % | ✓ | 4.766327  | 0.002072 | 0.026214  | 0.000568 | 0.004027  | 0.000014 | 79.990      | 4.866797     | 1.00056545   | 1.348E-11    |
| 21F16477              | 24.0 % | ✓ | 5.351777  | 0.004028 | 0.007827  | 0.002413 | 0.005998  | 0.000038 | 79.997      | 4.867464     | 1.00056550   | 3.359E-12    |
| 21F16479              | 24.0 % | ✓ | 4.441850  | 0.002183 | 0.005406  | 0.000657 | 0.002919  | 0.000082 | 80.011      | 4.868800     | 1.00056560   | 1.099E-11    |
| 21F16480              | 24.0 % | ✓ | 5.531111  | 0.002515 | 0.009608  | 0.000474 | 0.006594  | 0.000066 | 80.018      | 4.869468     | 1.00056565   | 1.727E-11    |
| 21F16482              | 24.0 % | ✓ | 4.112152  | 0.001960 | 0.005162  | 0.000665 | 0.001850  | 0.000013 | 80.032      | 4.870804     | 1.00056575   | 8.835E-12    |
| 21F16483              | 24.0 % | ✓ | 7.060063  | 0.003668 | 0.002652  | 0.001040 | 0.011680  | 0.000034 | 80.039      | 4.871472     | 1.00056580   | 9.437E-12    |
| 21F16485              | 24.0 % | ✓ | 4.241837  | 0.001832 | 0.015663  | 0.000479 | 0.002241  | 0.000010 | 80.053      | 4.872875     | 1.00056590   | 1.362E-11    |
| 21F16486              | 24.0 % | ✓ | 5.071364  | 0.002319 | 0.004596  | 0.000640 | 0.005129  | 0.000017 | 80.060      | 4.873544     | 1.00056595   | 1.218E-11    |
| 21F16488              | 24.0 % | ✓ | 4.037780  | 0.001696 | 0.004128  | 0.000304 | 0.001535  | 0.000007 | 80.074      | 4.874881     | 1.00056605   | 1.891E-11    |
| 21F16489              | 24.0 % | ✓ | 4.586077  | 0.002738 | 0.001738  | 0.001455 | 0.003338  | 0.000024 | 80.081      | 4.875550     | 1.00056610   | 4.608E-12    |
| 21F16491              | 24.0 % | ✓ | 7.486269  | 0.003792 | 0.008055  | 0.001150 | 0.013067  | 0.000034 | 80.095      | 4.876887     | 1.00056619   | 1.047E-11    |
| 21F16492              | 24.0 % | ✓ | 3.865281  | 0.001583 | 0.032404  | 0.000252 | 0.000965  | 0.000004 | 80.102      | 4.877556     | 1.00056624   | 2.585E-11    |
| 21F16494              | 24.0 % | ✓ | 4.119822  | 0.002518 | 0.002770  | 0.001574 | 0.001817  | 0.000023 | 80.117      | 4.878961     | 1.00056635   | 3.916E-12    |
| 21F16495              | 24.0 % | ✓ | 4.253945  | 0.001907 | 0.007204  | 0.000642 | 0.002295  | 0.000012 | 80.124      | 4.879631     | 1.00056639   | 1.051E-11    |

| Procedure<br>Blanks |        | 36Ar ± 1σ (SE)<br>[fA] | 37Ar ± 1σ (SE)<br>[fA] | 38Ar ± 1σ (SE)<br>[fA] | 39Ar ± 1σ (SE)<br>[fA] | 40Ar ± 1σ (SE)<br>[fA] |
|---------------------|--------|------------------------|------------------------|------------------------|------------------------|------------------------|
| 21F16452            | 24.0 % | 0.0483459 ±0.0003560   | 0.0080232 ±0.0064848   | 0.0145805 ±0.0060664   | 0.0310880 ±0.0063874   | 13.567482 ±0.014611    |
| 21F16453            | 24.0 % | 0.0483459 ±0.0003560   | 0.0080232 ±0.0064848   | 0.0145805 ±0.0060664   | 0.0310880 ±0.0063874   | 13.567482 ±0.014611    |
| 21F16455            | 24.0 % | 0.0478615 ±0.0003603   | 0.0103765 ±0.0058010   | 0.0121016 ±0.0068540   | 0.0109162 ±0.0063589   | 13.278057 ±0.014397    |
| 21F16456            | 24.0 % | 0.0478615 ±0.0003603   | 0.0103765 ±0.0058010   | 0.0121016 ±0.0068540   | 0.0109162 ±0.0063589   | 13.278057 ±0.014397    |
| 21F16458            | 24.0 % | 0.0465714 ±0.0003079   | 0.0086221 ±0.0062726   | 0.0172318 ±0.0071120   | 0.0096377 ±0.0059505   | 12.815420 ±0.014711    |
| 21F16459            | 24.0 % | 0.0465714 ±0.0003079   | 0.0086221 ±0.0062726   | 0.0172318 ±0.0071120   | 0.0096377 ±0.0059505   | 12.815420 ±0.014711    |
| 21F16461            | 24.0 % | 0.0448276 ±0.0003462   | 0.0037583 ±0.0064903   | 0.0060590 ±0.0056772   | 0.0174137 ±0.0065147   | 12.317084 ±0.015329    |
| 21F16462            | 24.0 % | 0.0448276 ±0.0003462   | 0.0037583 ±0.0064903   | 0.0060590 ±0.0056772   | 0.0174137 ±0.0065147   | 12.317084 ±0.015329    |
| 21F16464            | 24.0 % | 0.0442277 ±0.0003644   | 0.0140105 ±0.0067991   | 0.0204935 ±0.0069407   | 0.0169800 ±0.0067762   | 12.241237 ±0.017455    |
| 21F16465            | 24.0 % | 0.0442277 ±0.0003644   | 0.0140105 ±0.0067991   | 0.0204935 ±0.0069407   | 0.0169800 ±0.0067762   | 12.241237 ±0.017455    |
| 21F16467            | 24.0 % | 0.0443483 ±0.0003096   | 0.0204198 ±0.0058933   | 0.0058653 ±0.0056979   | 0.0310368 ±0.0065371   | 12.287171 ±0.016059    |
| 21F16468            | 24.0 % | 0.0443483 ±0.0003096   | 0.0204198 ±0.0058933   | 0.0058653 ±0.0056979   | 0.0310368 ±0.0065371   | 12.287171 ±0.016059    |
| 21F16470            | 24.0 % | 0.0445357 ±0.0003405   | 0.0119307 ±0.0066167   | 0.0089566 ±0.0059312   | 0.0062280 ±0.0056299   | 12.306920 ±0.015825    |
| 21F16471            | 24.0 % | 0.0445357 ±0.0003405   | 0.0119307 ±0.0066167   | 0.0089566 ±0.0059312   | 0.0062280 ±0.0056299   | 12.306920 ±0.015825    |
| 21F16473            | 24.0 % | 0.0443015 ±0.0003534   | 0.0115740 ±0.0058438   | 0.0092715 ±0.0065606   | 0.0194441 ±0.0067669   | 12.413941 ±0.014562    |
| 21F16474            | 24.0 % | 0.0443015 ±0.0003534   | 0.0115740 ±0.0058438   | 0.0092715 ±0.0065606   | 0.0194441 ±0.0067669   | 12.413941 ±0.014562    |
| 21F16476            | 24.0 % | 0.0448073 ±0.0003422   | 0.0149212 ±0.0063927   | 0.0011525 ±0.0063880   | 0.0178939 ±0.0059547   | 12.443301 ±0.015840    |
| 21F16477            | 24.0 % | 0.0448073 ±0.0003422   | 0.0149212 ±0.0063927   | 0.0011525 ±0.0063880   | 0.0178939 ±0.0059547   | 12.443301 ±0.015840    |
| 21F16479            | 24.0 % | 0.0155940 ±0.0053539   | 0.0150612 ±0.0066515   | 0.0096008 ±0.0063919   | 0.0312462 ±0.0139956   | 2.852007 ±0.016934     |
| 21F16480            | 24.0 % | 0.0155940 ±0.0053539   | 0.0150612 ±0.0066515   | 0.0096008 ±0.0063919   | 0.0312462 ±0.0139956   | 2.852007 ±0.016934     |
| 21F16482            | 24.0 % | 0.0443015 ±0.0003534   | 0.0115740 ±0.0058438   | 0.0092715 ±0.0065606   | 0.0194441 ±0.0067669   | 12.413941 ±0.014562    |
| 21F16483            | 24.0 % | 0.0443015 ±0.0003534   | 0.0115740 ±0.0058438   | 0.0092715 ±0.0065606   | 0.0194441 ±0.0067669   | 12.413941 ±0.014562    |
| 21F16485            | 24.0 % | 0.0443015 ±0.0003534   | 0.0115740 ±0.0058438   | 0.0092715 ±0.0065606   | 0.0194441 ±0.0067669   | 12.413941 ±0.014562    |
| 21F16486            | 24.0 % | 0.0443015 ±0.0003534   | 0.0115740 ±0.0058438   | 0.0092715 ±0.0065606   | 0.0194441 ±0.0067669   | 12.413941 ±0.014562    |
| 21F16488            | 24.0 % | 0.0443015 ±0.0003534   | 0.0115740 ±0.0058438   | 0.0092715 ±0.0065606   | 0.0194441 ±0.0067669   | 12.413941 ±0.014562    |
| 21F16489            | 24.0 % | 0.0443015 ±0.0003534   | 0.0115740 ±0.0058438   | 0.0092715 ±0.0065606   | 0.0194441 ±0.0067669   | 12.413941 ±0.014562    |
| 21F16491            | 24.0 % | 0.0443015 ±0.0003534   | 0.0115740 ±0.0058438   | 0.0092715 ±0.0065606   | 0.0194441 ±0.0067669   | 12.413941 ±0.014562    |
| 21F16492            | 24.0 % | 0.0443015 ±0.0003534   | 0.0115740 ±0.0058438   | 0.0092715 ±0.0065606   | 0.0194441 ±0.0067669   | 12.413941 ±0.014562    |
| 21F16494            | 24.0 % | 0.0448073 ±0.0003422   | 0.0149212 ±0.0063927   | 0.0011525 ±0.0063880   | 0.0178939 ±0.0059547   | 12.443300 ±0.015840    |
| 21F16495            | 24.0 % | 0.0448073 ±0.0003422   | 0.0149212 ±0.0063927   | 0.0011525 ±0.0063880   | 0.0178939 ±0.0059547   | 12.443300 ±0.015840    |

| Intercept Values |        | 36Ar ± 1σ (SE)<br>[fA] | r2     | Regression<br>(type,n) | 37Ar ± 1σ (SE)<br>[fA] | r2     | Regression<br>(type,n) | 38Ar ± 1σ (SE)<br>[fA] | r2     | Regression<br>(type,n) | 39Ar ± 1σ (SE)<br>[fA] | r2     | Regression<br>(type,n) | 40Ar ± 1σ (SE)<br>[fA] | r2     | Regression<br>(type,n) |
|------------------|--------|------------------------|--------|------------------------|------------------------|--------|------------------------|------------------------|--------|------------------------|------------------------|--------|------------------------|------------------------|--------|------------------------|
| 21F16452         | 24.0 % | 0.3532943 ±0.0008986   | 0.9232 | EXP 150 of 150         | 0.1522874 ±0.0062916   | 0.0680 | EXP 150 of 150         | 1.0312881 ±0.0064097   | 0.7371 | EXP 150 of 150         | 75.116631 ±0.012196    | 0.9998 | EXP 150 of 150         | 378.73102 ±0.02936     | 0.9999 | EXP 150 of 150         |
| 21F16453         | 24.0 % | 0.2907595 ±0.0007516   | 0.9093 | EXP 148 of 150         | 0.0756121 ±0.0063507   | 0.0000 | EXP 146 of 150         | 1.2770077 ±0.0072578   | 0.7891 | EXP 149 of 150         | 97.883543 ±0.012384    | 0.9999 | EXP 147 of 150         | 440.62667 ±0.03203     | 0.9999 | EXP 150 of 150         |
| 21F16455         | 24.0 % | 0.9484112 ±0.0011835   | 0.9861 | EXP 147 of 150         | 0.2340732 ±0.0064834   | 0.0429 | EXP 150 of 150         | 1.6149887 ±0.0070297   | 0.8406 | EXP 150 of 150         | 113.999837 ±0.014772   | 0.9999 | EXP 150 of 150         | 705.20775 ±0.03860     | 1.0000 | EXP 149 of 150         |
| 21F16456         | 24.0 % | 1.0304962 ±0.0014502   | 0.9819 | EXP 150 of 150         | 0.9862935 ±0.0060676   | 0.6735 | EXP 150 of 150         | 2.8553939 ±0.0066118   | 0.9596 | EXP 147 of 150         | 206.944139 ±0.018247   | 0.9999 | EXP 150 of 150         | 1065.03751 ±0.04546    | 1.0000 | EXP 150 of 150         |
| 21F16458         | 24.0 % | 0.3271263 ±0.0009437   | 0.9075 | EXP 149 of 150         | 0.2913222 ±0.0060226   | 0.0848 | EXP 150 of 150         | 0.9942018 ±0.0064995   | 0.7354 | EXP 148 of 150         | 74.586701 ±0.011649    | 0.9998 | EXP 150 of 150         | 369.12073 ±0.02755     | 0.9999 | EXP 148 of 150         |
| 21F16459         | 24.0 % | 0.2488865 ±0.0007763   | 0.8662 | EXP 150 of 150         | 0.1306029 ±0.0060472   | 0.0741 | EXP 150 of 150         | 0.7764300 ±0.0066490   | 0.5771 | EXP 150 of 150         | 57.087215 ±0.012027    | 0.9996 | EXP 150 of 150         | 280.16204 ±0.02568     | 0.9999 | EXP 149 of 150         |
| 21F16461         | 24.0 % | 0.1825923 ±0.0005853   | 0.7954 | EXP 150 of 150         | 0.1584099 ±0.0064039   | 0.0525 | EXP 148 of 150         | 0.8836971 ±0.0065960   | 0.6891 | EXP 150 of 150         | 66.352079 ±0.011144    | 0.9998 | EXP 149 of 150         | 293.39795 ±0.02772     | 0.9999 | EXP 150 of 150         |
| 21F16462         | 24.0 % | 0.1380109 ±0.0005816   | 0.5607 | EXP 150 of 150         | 0.2094854 ±0.0063291   | 0.0862 | EXP 150 of 150         | 0.6635657 ±0.0058138   | 0.6045 | EXP 150 of 150         | 49.384056 ±0.009636    | 0.9997 | EXP 150 of 150         | 218.20115 ±0.02341     | 0.9999 | EXP 149 of 150         |
| 21F16464         | 24.0 % | 0.1613826 ±0.0005616   | 0.8126 | EXP 149 of 150         | 0.0391862 ±0.0060387   | 0.0009 | EXP 150 of 150         | 0.5028353 ±0.0066782   | 0.3847 | EXP 150 of 150         | 36.449566 ±0.010206    | 0.9994 | EXP 150 of 150         | 178.20508 ±0.02216     | 0.9998 | EXP 150 of 150         |
| 21F16465         | 24.0 % | 0.3896151 ±0.0008537   | 0.9442 | EXP 149 of 150         | 0.6355553 ±0.0066937   | 0.4763 | EXP 150 of 150         | 1.5132989 ±0.0065964   | 0.8656 | EXP 150 of 150         | 112.657862 ±0.013023   | 0.9999 | EXP 149 of 150         | 521.13592 ±0.03153     | 1.0000 | EXP 150 of 150         |
| 21F16467         | 24.0 % | 0.3809023 ±0.0009157   | 0.9374 | EXP 150 of 150         | 0.6853417 ±0.0059958   | 0.5222 | EXP 146 of 150         | 1.4247556 ±0.0065429   | 0.8558 | EXP 147 of 150         | 105.592490 ±0.013636   | 0.9999 | EXP 149 of 150         | 495.96795 ±0.03110     | 1.0000 | EXP 149 of 150         |
| 21F16468         | 24.0 % | 0.3114781 ±0.0007669   | 0.9114 | EXP 147 of 150         | 0.6727370 ±0.0064387   | 0.4869 | EXP 150 of 150         | 1.5217508 ±0.0066715   | 0.8651 | EXP 150 of 150         | 114.789726 ±0.013944   | 0.9999 | EXP 148 of 150         | 508.17256 ±0.03535     | 1.0000 | EXP 150 of 150         |
| 21F16470         | 24.0 % | 0.4537856 ±0.0009160   | 0.9556 | EXP 150 of 150         | 0.8196756 ±0.0058320   | 0.6016 | EXP 150 of 150         | 1.1214648 ±0.0061614   | 0.7836 | EXP 147 of 150         | 82.168635 ±0.012835    | 0.9998 | EXP 150 of 150         | 434.39274 ±0.03255     | 0.9999 | EXP 150 of 150         |
| 21F16471         | 24.0 % | 0.1134039 ±0.0005726   | 0.3253 | EXP 150 of 150         | 0.0547510 ±0.0061419   | 0.0007 | EXP 150 of 150         | 0.4809319 ±0.0070493   | 0.3659 | EXP 150 of 150         | 36.073131 ±0.009298    | 0.9995 | EXP 150 of 150         | 162.83370 ±0.02235     | 0.9997 | EXP 148 of 150         |
| 21F16473         | 24.0 % | 0.1694792 ±0.0006964   | 0.6763 | EXP 150 of 150         | 0.0508791 ±0.0057152   | 0.0000 | EXP 149 of 150         | 0.7484954 ±0.0063135   | 0.5219 | EXP 150 of 150         | 57.353594 ±0.010296    | 0.9997 | EXP 150 of 150         | 257.10056 ±0.02614     | 0.9999 | EXP 148 of 150         |
| 21F16474         | 24.0 % | 0.5623053 ±0.0010838   | 0.9624 | EXP 150 of 150         | 0.7095096 ±0.0062029   | 0.5482 | EXP 149 of 150         | 1.4801825 ±0.0059691   | 0.8695 | EXP 146 of 150         | 106.202345 ±0.014379   | 0.9999 | EXP 150 of 150         | 555.23343 ±0.03297     | 1.0000 | EXP 148 of 150         |
| 21F16476         | 24.0 % | 0.3481633 ±0.0008597   | 0.9269 | EXP 149 of 150         | 0.4437989 ±0.0066619   | 0.3067 | EXP 150 of 150         | 1.0779734 ±0.0068596   | 0.7260 | EXP 150 of 150         | 79.777903 ±0.011704    | 0.9998 | EXP 150 of 150         | 393.24975 ±0.02790     | 0.9999 | EXP 147 of 150         |
| 21F16477         | 24.0 % | 0.1450634 ±0.0005116   | 0.7432 | EXP 150 of 150         | 0.0433364 ±0.0059874   | 0.0003 | EXP 150 of 150         | 0.2555865 ±0.0065295   | 0.1256 | EXP 150 of 150         | 17.718086 ±0.008302    | 0.9981 | EXP 150 of 150         | 107.33129 ±0.02133     | 0.9993 | EXP 150 of 150         |
| 21F16479         | 24.0 % | 0.2080276 ±0.0007046   | 0.7923 | EXP 150 of 150         | 0.0924277 ±0.0066456   | 0.0084 | EXP 150 of 150         | 0.9306044 ±0.0066030   | 0.6562 | EXP 150 of 150         | 69.834331 ±0.012879    | 0.9997 | EXP 150 of 150         | 313.43227 ±0.03035     | 0.9999 | EXP 150 of 150         |
| 21F16480         | 24.0 % | 0.5639524 ±0.0010401   | 0.9649 | EXP 150 of 150         | 0.1885246 ±0.0053652   | 0.0432 | EXP 147 of 150         | 1.2378270 ±0.0065512   | 0.7959 | EXP 150 of 150         | 88.094789 ±0.012350    | 0.9998 | EXP 150 of 150         | 490.76668 ±0.03677     | 0.9999 | EXP 150 of 150         |
| 21F16482         | 24.0 % | 0.1501459 ±0.0005980   | 0.6056 | EXP 149 of 150         | 0.0756755 ±0.0058350   | 0.0005 | EXP 149 of 150         | 0.7904040 ±0.0066254   | 0.5754 | EXP 149 of 150         | 60.609546 ±0.012847    | 0.9996 | EXP 150 of 150         | 261.99188 ±0.02683     | 0.9999 | EXP 150 of 150         |
| 21F16483         | 24.0 % | 0.4600820 ±0.0009226   | 0.9593 | EXP 147 of 150         | 0.0320610 ±0.0055104   | 0.0003 | EXP 149 of 150         | 0.5615477 ±0.0068418   | 0.4186 | EXP 150 of 150         | 37.714089 ±0.010006    | 0.9994 | EXP 150 of 150         | 278.99156 ±0.02591     | 0.9999 | EXP 148 of 150         |
| 21F16485         | 24.0 % | 0.2359653 ±0.0007337   | 0.8253 | EXP 150 of 150         | 0.3021734 ±0.0066641   | 0.1615 | EXP 150 of 150         | 1.2068989 ±0.0063776   | 0.8083 | EXP 150 of 150         | 90.577875 ±0.011564    | 0.9999 | EXP 145 of 150         | 397.19915 ±0.03515     | 0.9999 | EXP 150 of 150         |
| 21F16486         | 24.0 % | 0.3723397 ±0.0008977   | 0.9365 | EXP 150 of 150         | 0.0753281 ±0.0066824   | 0.0014 | EXP 150 of 150         | 0.9372214 ±0.0066979   | 0.6720 | EXP 150 of 150         | 67.741647 ±0.012782    | 0.9997 | EXP 149 of 150         | 356.44002 ±0.02844     | 0.9999 | EXP 150 of 150         |
| 21F16488         | 24.0 % | 0.2357345 ±0.0007114   | 0.8199 | EXP 149 of 150         | 0.1232500 ±0.0057877   | 0.0350 | EXP 149 of 150         | 1.6977809 ±0.0064340   | 0.8873 | EXP 149 of 150         | 132.111469 ±0.015578   | 0.9999 | EXP 150 of 150         | 546.67650 ±0.03512     | 1.0000 | EXP 150 of 150         |
| 21F16489         | 24.0 % | 0.1336379 ±0.0005084   | 0.6526 | EXP 148 of 150         | 0.0216577 ±0.0060957   | 0.0003 | EXP 150 of 150         | 0.3861899 ±0.0064016   | 0.2706 | EXP 150 of 150         | 28.357867 ±0.009052    | 0.9992 | EXP 150 of 150         | 142.59644 ±0.02252     | 0.9996 | EXP 150 of 150         |
| 21F16491         | 24.0 % | 0.5311056 ±0.0009193   | 0.9709 | EXP 150 of 150         | 0.0766159 ±0.0072145   | 0.0001 | EXP 150 of 150         | 0.6148246 ±0.0064460   | 0.5165 | EXP 150 of 150         | 39.467770 ±0.009694    | 0.9995 | EXP 150 of 150         | 308.23536 ±0.02869     | 0.9999 | EXP 150 of 150         |
| 21F16492         | 24.0 % | 0.2161251 ±0.0006185   | 0.7774 | EXP 148 of 150         | 1.2623550 ±0.0070959   | 0.7428 | EXP 149 of 150         | 2.4379636 ±0.0069565   | 0.9373 | EXP 147 of 150         | 188.608993 ±0.016942   | 0.9999 | EXP 147 of 150         | 742.60136 ±0.04004     | 1.0000 | EXP 150 of 150         |
| 21F16494         | 24.0 % | 0.0907975 ±0.0004694   | 0.1256 | EXP 150 of 150         | 0.0301168 ±0.0058044   | 0.0000 | EXP 150 of 150         | 0.3548660 ±0.0059021   | 0.3209 | EXP 147 of 150         | 26.826212 ±0.009027    | 0.9991 | EXP 150 of 150         | 123.07604 ±0.02083     | 0.9995 | EXP 147 of 150         |
| 21F16495         | 24.0 % | 0.1957927 ±0.0006373   | 0.8075 | EXP 145 of 150         | 0.1176075 ±0.0065439   | 0.0027 | EXP 149 of 150         | 0.9303092 ±0.0070179   | 0.6769 | EXP 150 of 150         | 69.689940 ±0.011471    | 0.9998 | EXP 148 of 150         | 309.32681 ±0.02781     | 0.9999 | EXP 150 of 150         |

| Project Info |        | Analyst     | Irradiation | X-pos | Y-pos | Z/H-pos | Project                | Experiment | Nmb |
|--------------|--------|-------------|-------------|-------|-------|---------|------------------------|------------|-----|
| 21F16452     | 24.0 % | Dan Miggins | 21-OSU-04   | 0.00  | 0.00  | 11.21   | Oregon\Swenton (20-01) | 21F16448   | 01  |
| 21F16453     | 24.0 % | Dan Miggins | 21-OSU-04   | 0.00  | 0.00  | 11.21   | Oregon\Swenton (20-01) | 21F16448   | 01  |
| 21F16455     | 24.0 % | Dan Miggins | 21-OSU-04   | 0.00  | 0.00  | 11.21   | Oregon\Swenton (20-01) | 21F16448   | 01  |
| 21F16456     | 24.0 % | Dan Miggins | 21-OSU-04   | 0.00  | 0.00  | 11.21   | Oregon\Swenton (20-01) | 21F16448   | 01  |
| 21F16458     | 24.0 % | Dan Miggins | 21-OSU-04   | 0.00  | 0.00  | 11.21   | Oregon\Swenton (20-01) | 21F16448   | 01  |
| 21F16459     | 24.0 % | Dan Miggins | 21-OSU-04   | 0.00  | 0.00  | 11.21   | Oregon\Swenton (20-01) | 21F16448   | 01  |
| 21F16461     | 24.0 % | Dan Miggins | 21-OSU-04   | 0.00  | 0.00  | 11.21   | Oregon\Swenton (20-01) | 21F16448   | 01  |
| 21F16462     | 24.0 % | Dan Miggins | 21-OSU-04   | 0.00  | 0.00  | 11.21   | Oregon\Swenton (20-01) | 21F16448   | 01  |
| 21F16464     | 24.0 % | Dan Miggins | 21-OSU-04   | 0.00  | 0.00  | 11.21   | Oregon\Swenton (20-01) | 21F16448   | 01  |
| 21F16465     | 24.0 % | Dan Miggins | 21-OSU-04   | 0.00  | 0.00  | 11.21   | Oregon\Swenton (20-01) | 21F16448   | 01  |
| 21F16467     | 24.0 % | Dan Miggins | 21-OSU-04   | 0.00  | 0.00  | 11.21   | Oregon\Swenton (20-01) | 21F16448   | 01  |
| 21F16468     | 24.0 % | Dan Miggins | 21-OSU-04   | 0.00  | 0.00  | 11.21   | Oregon\Swenton (20-01) | 21F16448   | 01  |
| 21F16470     | 24.0 % | Dan Miggins | 21-OSU-04   | 0.00  | 0.00  | 11.21   | Oregon\Swenton (20-01) | 21F16448   | 01  |
| 21F16471     | 24.0 % | Dan Miggins | 21-OSU-04   | 0.00  | 0.00  | 11.21   | Oregon\Swenton (20-01) | 21F16448   | 01  |
| 21F16473     | 24.0 % | Dan Miggins | 21-OSU-04   | 0.00  | 0.00  | 11.21   | Oregon\Swenton (20-01) | 21F16448   | 01  |
| 21F16474     | 24.0 % | Dan Miggins | 21-OSU-04   | 0.00  | 0.00  | 11.21   | Oregon\Swenton (20-01) | 21F16448   | 01  |
| 21F16476     | 24.0 % | Dan Miggins | 21-OSU-04   | 0.00  | 0.00  | 11.21   | Oregon\Swenton (20-01) | 21F16448   | 01  |
| 21F16477     | 24.0 % | Dan Miggins | 21-OSU-04   | 0.00  | 0.00  | 11.21   | Oregon\Swenton (20-01) | 21F16448   | 01  |
| 21F16479     | 24.0 % | Dan Miggins | 21-OSU-04   | 0.00  | 0.00  | 11.21   | Oregon\Swenton (20-01) | 21F16448   | 01  |
| 21F16480     | 24.0 % | Dan Miggins | 21-OSU-04   | 0.00  | 0.00  | 11.21   | Oregon\Swenton (20-01) | 21F16448   | 01  |
| 21F16482     | 24.0 % | Dan Miggins | 21-OSU-04   | 0.00  | 0.00  | 11.21   | Oregon\Swenton (20-01) | 21F16448   | 01  |
| 21F16483     | 24.0 % | Dan Miggins | 21-OSU-04   | 0.00  | 0.00  | 11.21   | Oregon\Swenton (20-01) | 21F16448   | 01  |
| 21F16485     | 24.0 % | Dan Miggins | 21-OSU-04   | 0.00  | 0.00  | 11.21   | Oregon\Swenton (20-01) | 21F16448   | 01  |
| 21F16486     | 24.0 % | Dan Miggins | 21-OSU-04   | 0.00  | 0.00  | 11.21   | Oregon\Swenton (20-01) | 21F16448   | 01  |
| 21F16488     | 24.0 % | Dan Miggins | 21-OSU-04   | 0.00  | 0.00  | 11.21   | Oregon\Swenton (20-01) | 21F16448   | 01  |
| 21F16489     | 24.0 % | Dan Miggins | 21-OSU-04   | 0.00  | 0.00  | 11.21   | Oregon\Swenton (20-01) | 21F16448   | 01  |
| 21F16491     | 24.0 % | Dan Miggins | 21-OSU-04   | 0.00  | 0.00  | 11.21   | Oregon\Swenton (20-01) | 21F16448   | 01  |
| 21F16492     | 24.0 % | Dan Miggins | 21-OSU-04   | 0.00  | 0.00  | 11.21   | Oregon\Swenton (20-01) | 21F16448   | 01  |
| 21F16494     | 24.0 % | Dan Miggins | 21-OSU-04   | 0.00  | 0.00  | 11.21   | Oregon\Swenton (20-01) | 21F16448   | 01  |
| 21F16495     | 24.0 % | Dan Miggins | 21-OSU-04   | 0.00  | 0.00  | 11.21   | Oregon\Swenton (20-01) | 21F16448   | 01  |

| Sample Parameters |        | Sample   | Material | Location   | Standard Name    | Standard (in Ma) | %1σ   | Standard Reference  | Standard 40Ar/39Ar | %1σ   | J          | %1σ   | Air 40Ar/36Ar | %1σ   | MDF (lin) | %1σ   | Volume Ratio | Sensitivity (mol/volt) | Day | Month | Year | Hour | Min | Resist |
|-------------------|--------|----------|----------|------------|------------------|------------------|-------|---------------------|--------------------|-------|------------|-------|---------------|-------|-----------|-------|--------------|------------------------|-----|-------|------|------|-----|--------|
| 21F16452          | 24.0 % | VS19-085 | Biotite  | Circle Bar | FCT-NM (4X11-21) | 28.201           | 0.082 | Kuiper et al (2008) | 9.40011            | 0.113 | 0.00165163 | 0.113 | 299.913       | 0.119 | 0.9988707 | 0.039 | 1            | 3.54E-14               | 4   | SEP   | 2021 | 11   | 14  | 1      |
| 21F16453          | 24.0 % | VS19-085 | Biotite  | Circle Bar | FCT-NM (4X11-21) | 28.201           | 0.082 | Kuiper et al (2008) | 9.40011            | 0.113 | 0.00165163 | 0.113 | 299.913       | 0.119 | 0.9988707 | 0.039 | 1            | 3.54E-14               | 4   | SEP   | 2021 | 11   | 24  | 1      |
| 21F16455          | 24.0 % | VS19-085 | Biotite  | Circle Bar | FCT-NM (4X11-21) | 28.201           | 0.082 | Kuiper et al (2008) | 9.40011            | 0.113 | 0.00165163 | 0.113 | 299.913       | 0.119 | 0.9988707 | 0.039 | 1            | 3.54E-14               | 4   | SEP   | 2021 | 11   | 44  | 1      |
| 21F16456          | 24.0 % | VS19-085 | Biotite  | Circle Bar | FCT-NM (4X11-21) | 28.201           | 0.082 | Kuiper et al (2008) | 9.40011            | 0.113 | 0.00165163 | 0.113 | 299.913       | 0.119 | 0.9988707 | 0.039 | 1            | 3.54E-14               | 4   | SEP   | 2021 | 11   | 55  | 1      |
| 21F16458          | 24.0 % | VS19-085 | Biotite  | Circle Bar | FCT-NM (4X11-21) | 28.201           | 0.082 | Kuiper et al (2008) | 9.40011            | 0.113 | 0.00165163 | 0.113 | 299.913       | 0.119 | 0.9988707 | 0.039 | 1            | 3.54E-14               | 4   | SEP   | 2021 | 12   | 15  | 1      |
| 21F16459          | 24.0 % | VS19-085 | Biotite  | Circle Bar | FCT-NM (4X11-21) | 28.201           | 0.082 | Kuiper et al (2008) | 9.40011            | 0.113 | 0.00165163 | 0.113 | 299.913       | 0.119 | 0.9988707 | 0.039 | 1            | 3.54E-14               | 4   | SEP   | 2021 | 12   | 25  | 1      |
| 21F16461          | 24.0 % | VS19-085 | Biotite  | Circle Bar | FCT-NM (4X11-21) | 28.201           | 0.082 | Kuiper et al (2008) | 9.40011            | 0.113 | 0.00165163 | 0.113 | 299.913       | 0.119 | 0.9988707 | 0.039 | 1            | 3.54E-14               | 4   | SEP   | 2021 | 12   | 45  | 1      |
| 21F16462          | 24.0 % | VS19-085 | Biotite  | Circle Bar | FCT-NM (4X11-21) | 28.201           | 0.082 | Kuiper et al (2008) | 9.40011            | 0.113 | 0.00165163 | 0.113 | 299.913       | 0.119 | 0.9988707 | 0.039 | 1            | 3.54E-14               | 4   | SEP   | 2021 | 12   | 55  | 1      |
| 21F16464          | 24.0 % | VS19-085 | Biotite  | Circle Bar | FCT-NM (4X11-21) | 28.201           | 0.082 | Kuiper et al (2008) | 9.40011            | 0.113 | 0.00165163 | 0.113 | 299.913       | 0.119 | 0.9988707 | 0.039 | 1            | 3.54E-14               | 4   | SEP   | 2021 | 13   | 15  | 1      |
| 21F16465          | 24.0 % | VS19-085 | Biotite  | Circle Bar | FCT-NM (4X11-21) | 28.201           | 0.082 | Kuiper et al (2008) | 9.40011            | 0.113 | 0.00165163 | 0.113 | 299.913       | 0.119 | 0.9988707 | 0.039 | 1            | 3.54E-14               | 4   | SEP   | 2021 | 13   | 25  | 1      |
| 21F16467          | 24.0 % | VS19-085 | Biotite  | Circle Bar | FCT-NM (4X11-21) | 28.201           | 0.082 | Kuiper et al (2008) | 9.40011            | 0.113 | 0.00165163 | 0.113 | 299.913       | 0.119 | 0.9988707 | 0.039 | 1            | 3.54E-14               | 4   | SEP   | 2021 | 13   | 46  | 1      |
| 21F16468          | 24.0 % | VS19-085 | Biotite  | Circle Bar | FCT-NM (4X11-21) | 28.201           | 0.082 | Kuiper et al (2008) | 9.40011            | 0.113 | 0.00165163 | 0.113 | 299.913       | 0.119 | 0.9988707 | 0.039 | 1            | 3.54E-14               | 4   | SEP   | 2021 | 13   | 56  | 1      |
| 21F16470          | 24.0 % | VS19-085 | Biotite  | Circle Bar | FCT-NM (4X11-21) | 28.201           | 0.082 | Kuiper et al (2008) | 9.40011            | 0.113 | 0.00165163 | 0.113 | 299.913       | 0.119 | 0.9988707 | 0.039 | 1            | 3.54E-14               | 4   | SEP   | 2021 | 14   | 16  | 1      |
| 21F16471          | 24.0 % | VS19-085 | Biotite  | Circle Bar | FCT-NM (4X11-21) | 28.201           | 0.082 | Kuiper et al (2008) | 9.40011            | 0.113 | 0.00165163 | 0.113 | 299.913       | 0.119 | 0.9988707 | 0.039 | 1            | 3.54E-14               | 4   | SEP   | 2021 | 14   | 26  | 1      |
| 21F16473          | 24.0 % | VS19-085 | Biotite  | Circle Bar | FCT-NM (4X11-21) | 28.201           | 0.082 | Kuiper et al (2008) | 9.40011            | 0.113 | 0.00165163 | 0.113 | 299.913       | 0.119 | 0.9988707 | 0.039 | 1            | 3.54E-14               | 4   | SEP   | 2021 | 14   | 46  | 1      |
| 21F16474          | 24.0 % | VS19-085 | Biotite  | Circle Bar | FCT-NM (4X11-21) | 28.201           | 0.082 | Kuiper et al (2008) | 9.40011            | 0.113 | 0.00165163 | 0.113 | 299.913       | 0.119 | 0.9988707 | 0.039 | 1            | 3.54E-14               | 4   | SEP   | 2021 | 14   | 56  | 1      |
| 21F16476          | 24.0 % | VS19-085 | Biotite  | Circle Bar | FCT-NM (4X11-21) | 28.201           | 0.082 | Kuiper et al (2008) | 9.40011            | 0.113 | 0.00165163 | 0.113 | 299.913       | 0.119 | 0.9988707 | 0.039 | 1            | 3.54E-14               | 4   | SEP   | 2021 | 15   | 17  | 1      |
| 21F16477          | 24.0 % | VS19-085 | Biotite  | Circle Bar | FCT-NM (4X11-21) | 28.201           | 0.082 | Kuiper et al (2008) | 9.40011            | 0.113 | 0.00165163 | 0.113 | 299.913       | 0.119 | 0.9988707 | 0.039 | 1            | 3.54E-14               | 4   | SEP   | 2021 | 15   | 27  | 1      |
| 21F16479          | 24.0 % | VS19-085 | Biotite  | Circle Bar | FCT-NM (4X11-21) | 28.201           | 0.082 | Kuiper et al (2008) | 9.40011            | 0.113 | 0.00165163 | 0.113 | 299.913       | 0.119 | 0.9988707 | 0.039 | 1            | 3.54E-14               | 4   | SEP   | 2021 | 15   | 47  | 1      |
| 21F16480          | 24.0 % | VS19-085 | Biotite  | Circle Bar | FCT-NM (4X11-21) | 28.201           | 0.082 | Kuiper et al (2008) | 9.40011            | 0.113 | 0.00165163 | 0.113 | 299.913       | 0.119 | 0.9988707 | 0.039 | 1            | 3.54E-14               | 4   | SEP   | 2021 | 15   | 57  | 1      |
| 21F16482          | 24.0 % | VS19-085 | Biotite  | Circle Bar | FCT-NM (4X11-21) | 28.201           | 0.082 | Kuiper et al (2008) | 9.40011            | 0.113 | 0.00165163 | 0.113 | 299.913       | 0.119 | 0.9988707 | 0.039 | 1            | 3.54E-14               | 4   | SEP   | 2021 | 16   | 17  | 1      |
| 21F16483          | 24.0 % | VS19-085 | Biotite  | Circle Bar | FCT-NM (4X11-21) | 28.201           | 0.082 | Kuiper et al (2008) | 9.40011            | 0.113 | 0.00165163 | 0.113 | 299.913       | 0.119 | 0.9988707 | 0.039 | 1            | 3.54E-14               | 4   | SEP   | 2021 | 16   | 27  | 1      |
| 21F16485          | 24.0 % | VS19-085 | Biotite  | Circle Bar | FCT-NM (4X11-21) | 28.201           | 0.082 | Kuiper et al (2008) | 9.40011            | 0.113 | 0.00165163 | 0.113 | 299.913       | 0.119 | 0.9988707 | 0.039 | 1            | 3.54E-14               | 4   | SEP   | 2021 | 16   | 48  | 1      |
| 21F16486          | 24.0 % | VS19-085 | Biotite  | Circle Bar | FCT-NM (4X11-21) | 28.201           | 0.082 | Kuiper et al (2008) | 9.40011            | 0.113 | 0.00165163 | 0.113 | 299.913       | 0.119 | 0.9988707 | 0.039 | 1            | 3.54E-14               | 4   | SEP   | 2021 | 16   | 58  | 1      |
| 21F16488          | 24.0 % | VS19-085 | Biotite  | Circle Bar | FCT-NM (4X11-21) | 28.201           | 0.082 | Kuiper et al (2008) | 9.40011            | 0.113 | 0.00165163 | 0.113 | 299.913       | 0.119 | 0.9988707 | 0.039 | 1            | 3.54E-14               | 4   | SEP   | 2021 | 17   | 18  | 1      |
| 21F16489          | 24.0 % | VS19-085 | Biotite  | Circle Bar | FCT-NM (4X11-21) | 28.201           | 0.082 | Kuiper et al (2008) | 9.40011            | 0.113 | 0.00165163 | 0.113 | 299.913       | 0.119 | 0.9988707 | 0.039 | 1            | 3.54E-14               | 4   | SEP   | 2021 | 17   | 28  | 1      |
| 21F16491          | 24.0 % | VS19-085 | Biotite  | Circle Bar | FCT-NM (4X11-21) | 28.201           | 0.082 | Kuiper et al (2008) | 9.40011            | 0.113 | 0.00165163 | 0.113 | 299.913       | 0.119 | 0.9988707 | 0.039 | 1            | 3.54E-14               | 4   | SEP   | 2021 | 17   | 48  | 1      |
| 21F16492          | 24.0 % | VS19-085 | Biotite  | Circle Bar | FCT-NM (4X11-21) | 28.201           | 0.082 | Kuiper et al (2008) | 9.40011            | 0.113 | 0.00165163 | 0.113 | 299.913       | 0.119 | 0.9988707 | 0.039 | 1            | 3.54E-14               | 4   | SEP   | 2021 | 17   | 58  | 1      |
| 21F16494          | 24.0 % | VS19-085 | Biotite  | Circle Bar | FCT-NM (4X11-21) | 28.201           | 0.082 | Kuiper et al (2008) | 9.40011            | 0.113 | 0.00165163 | 0.113 | 299.913       | 0.119 | 0.9988707 | 0.039 | 1            | 3.54E-14               | 4   | SEP   | 2021 | 18   | 19  | 1      |
| 21F16495          | 24.0 % | VS19-085 | Biotite  | Circle Bar | FCT-NM (4X11-21) | 28.201           | 0.082 | Kuiper et al (2008) | 9.40011            | 0.113 | 0.00165163 | 0.113 | 299.913       | 0.119 | 0.9988707 | 0.039 | 1            | 3.54E-14               | 4   | SEP   | 2021 | 18   | 29  | 1      |





21F16448.AGE >>> VS19-085 >>> OREGON | S

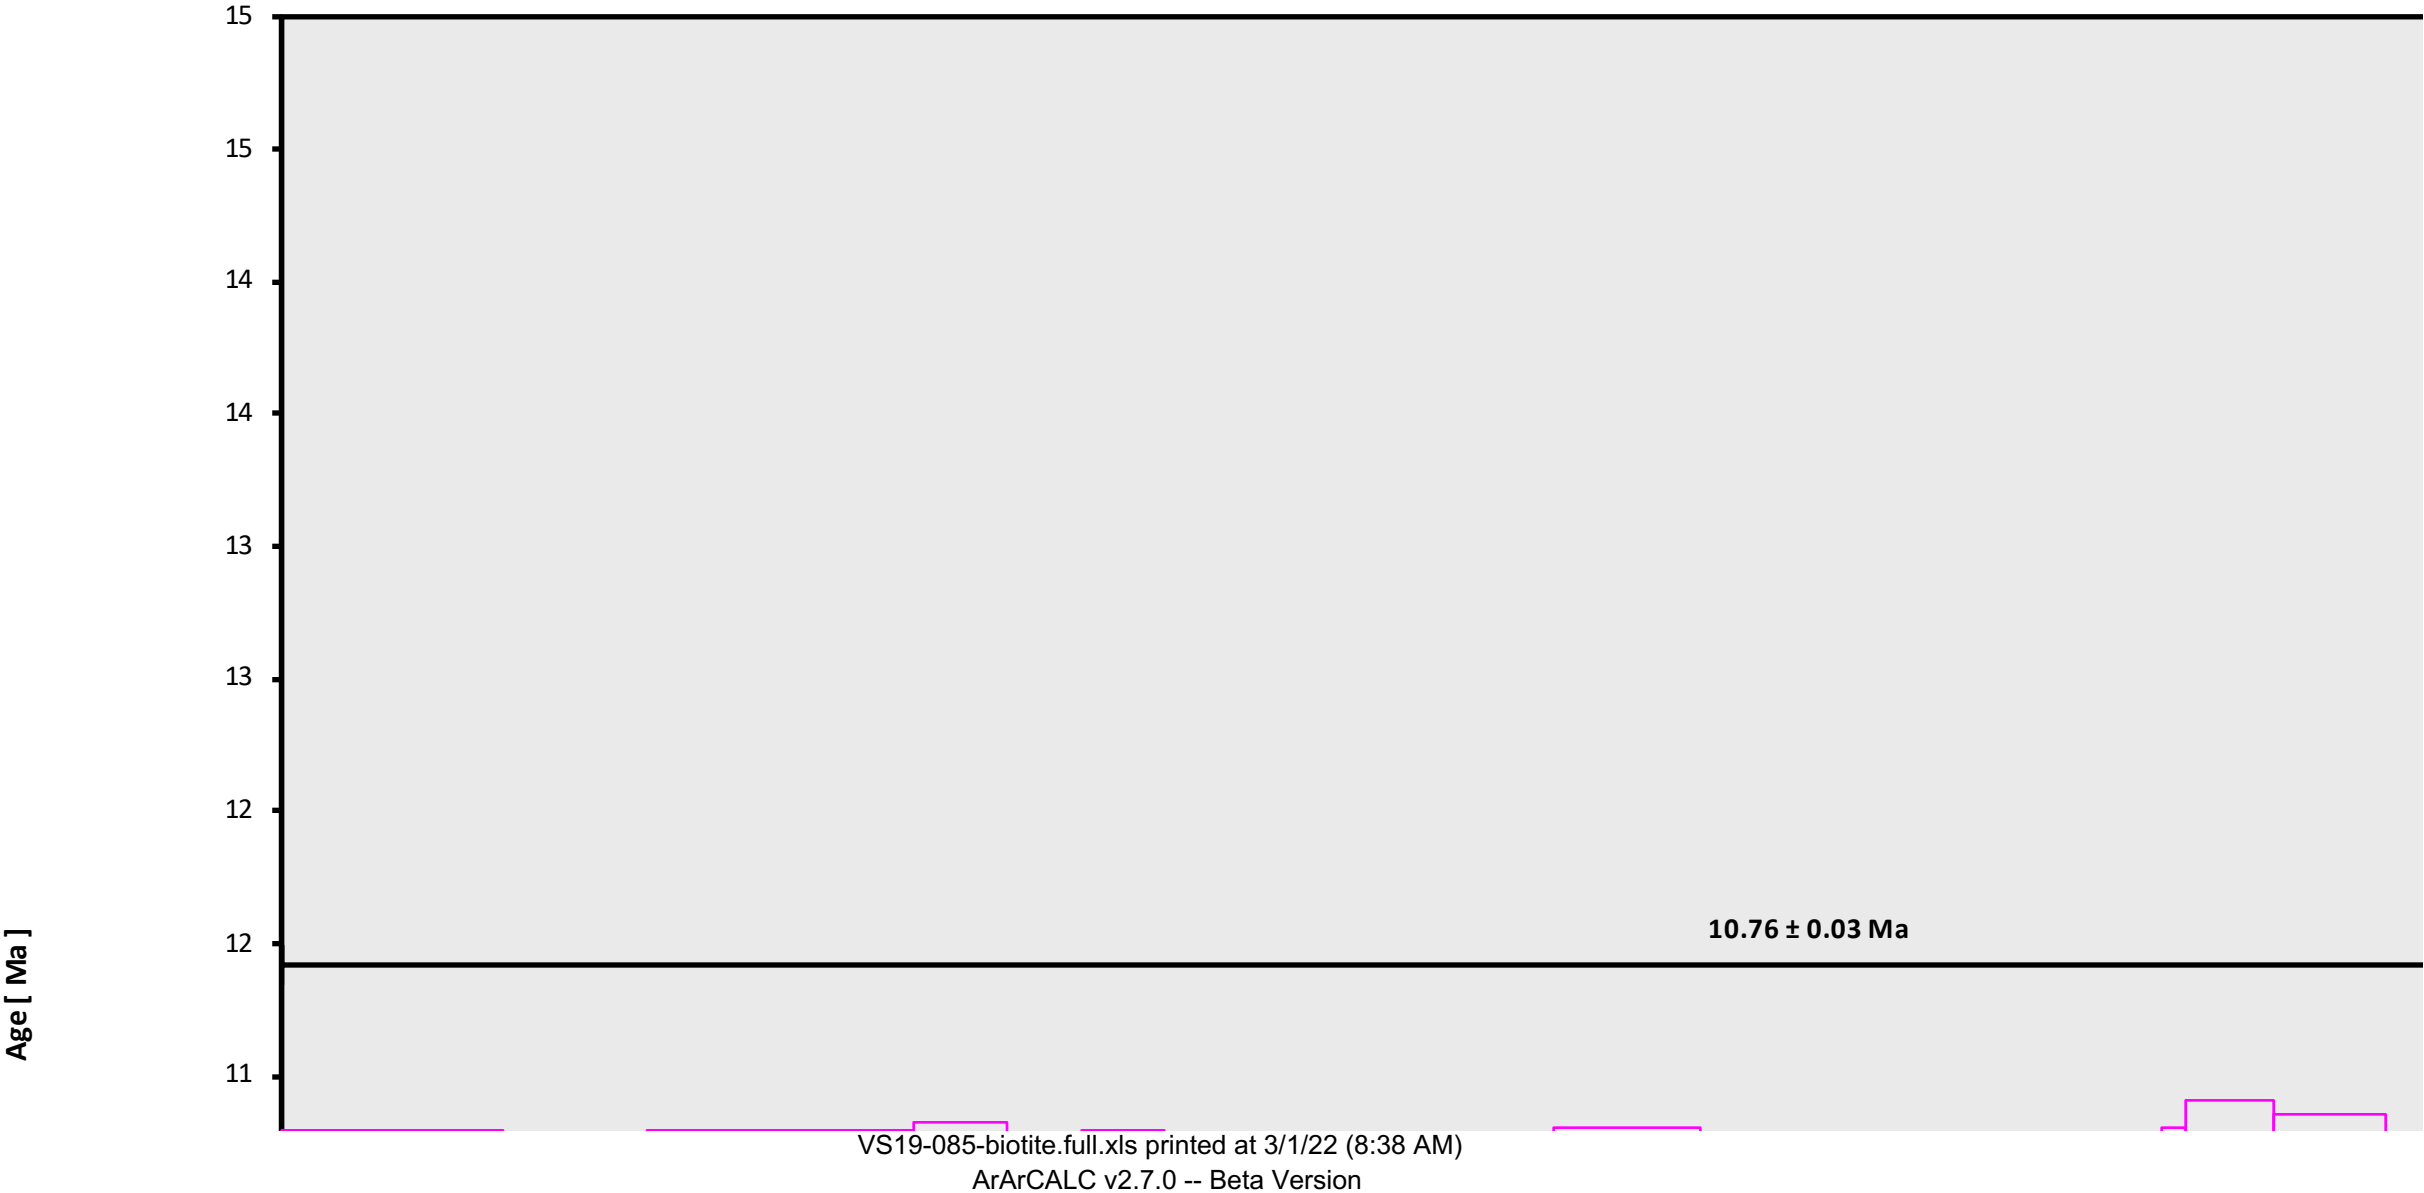

21F16448.AGE >>> VS19-085 >>> OREGON | SWENTON (20-01) PROJECT

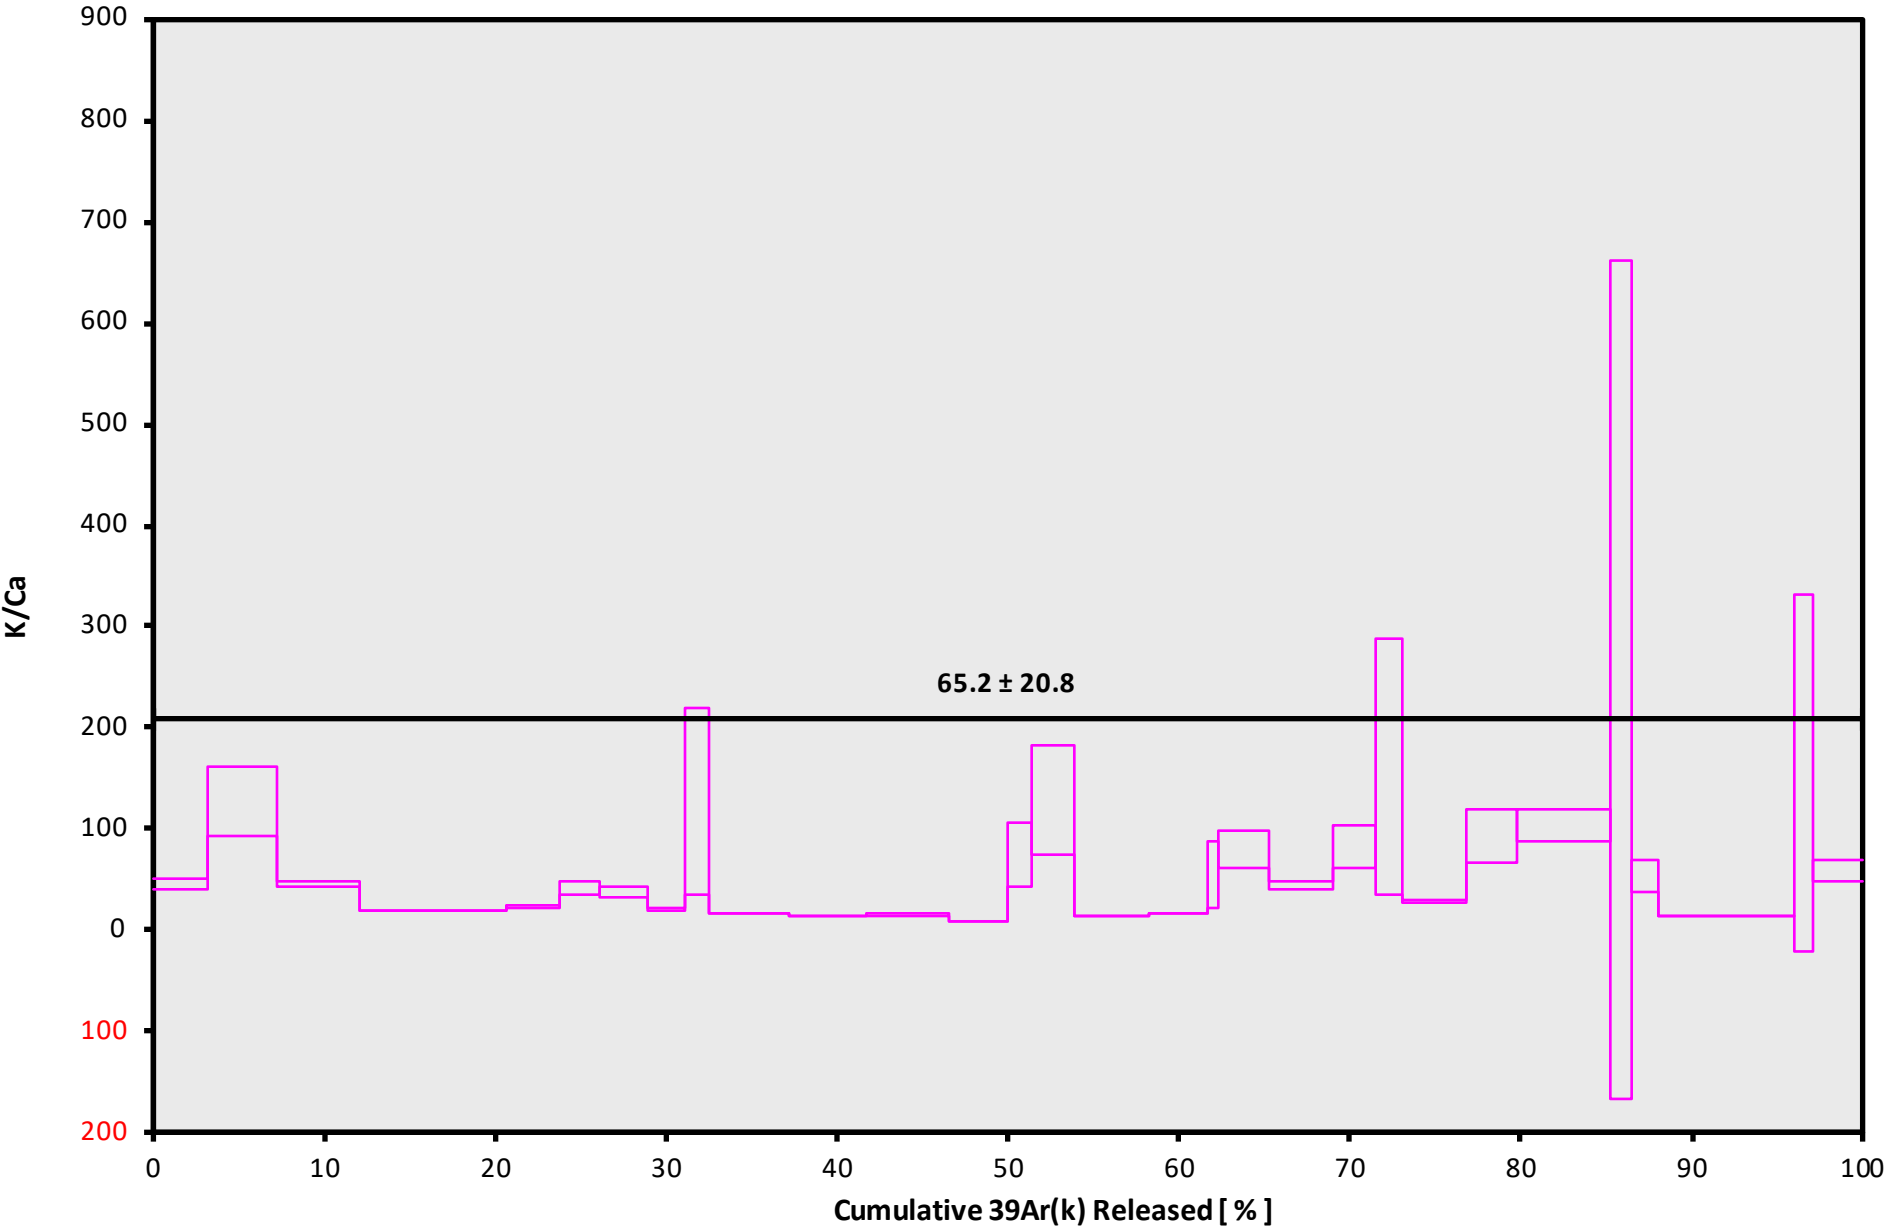

Ar-Ages in Ma

WEIGHTED PLATEAU

$10.76 \pm 0.03$

TOTAL FUSION

$10.76 \pm 0.03$

NORMAL ISOCHRON

$10.78 \pm 0.03$

INVERSE ISOCHRON

$10.78 \pm 0.03$

ASSUMED TRAPPED

Sample Info

Biotite

Circle Bar

Dan Miggins

IRR = 21-OSU-04 (4X11-

21F16448.AGE >>> VS19-085 >>> OREGON | SWENTON (20-01) PROJECT

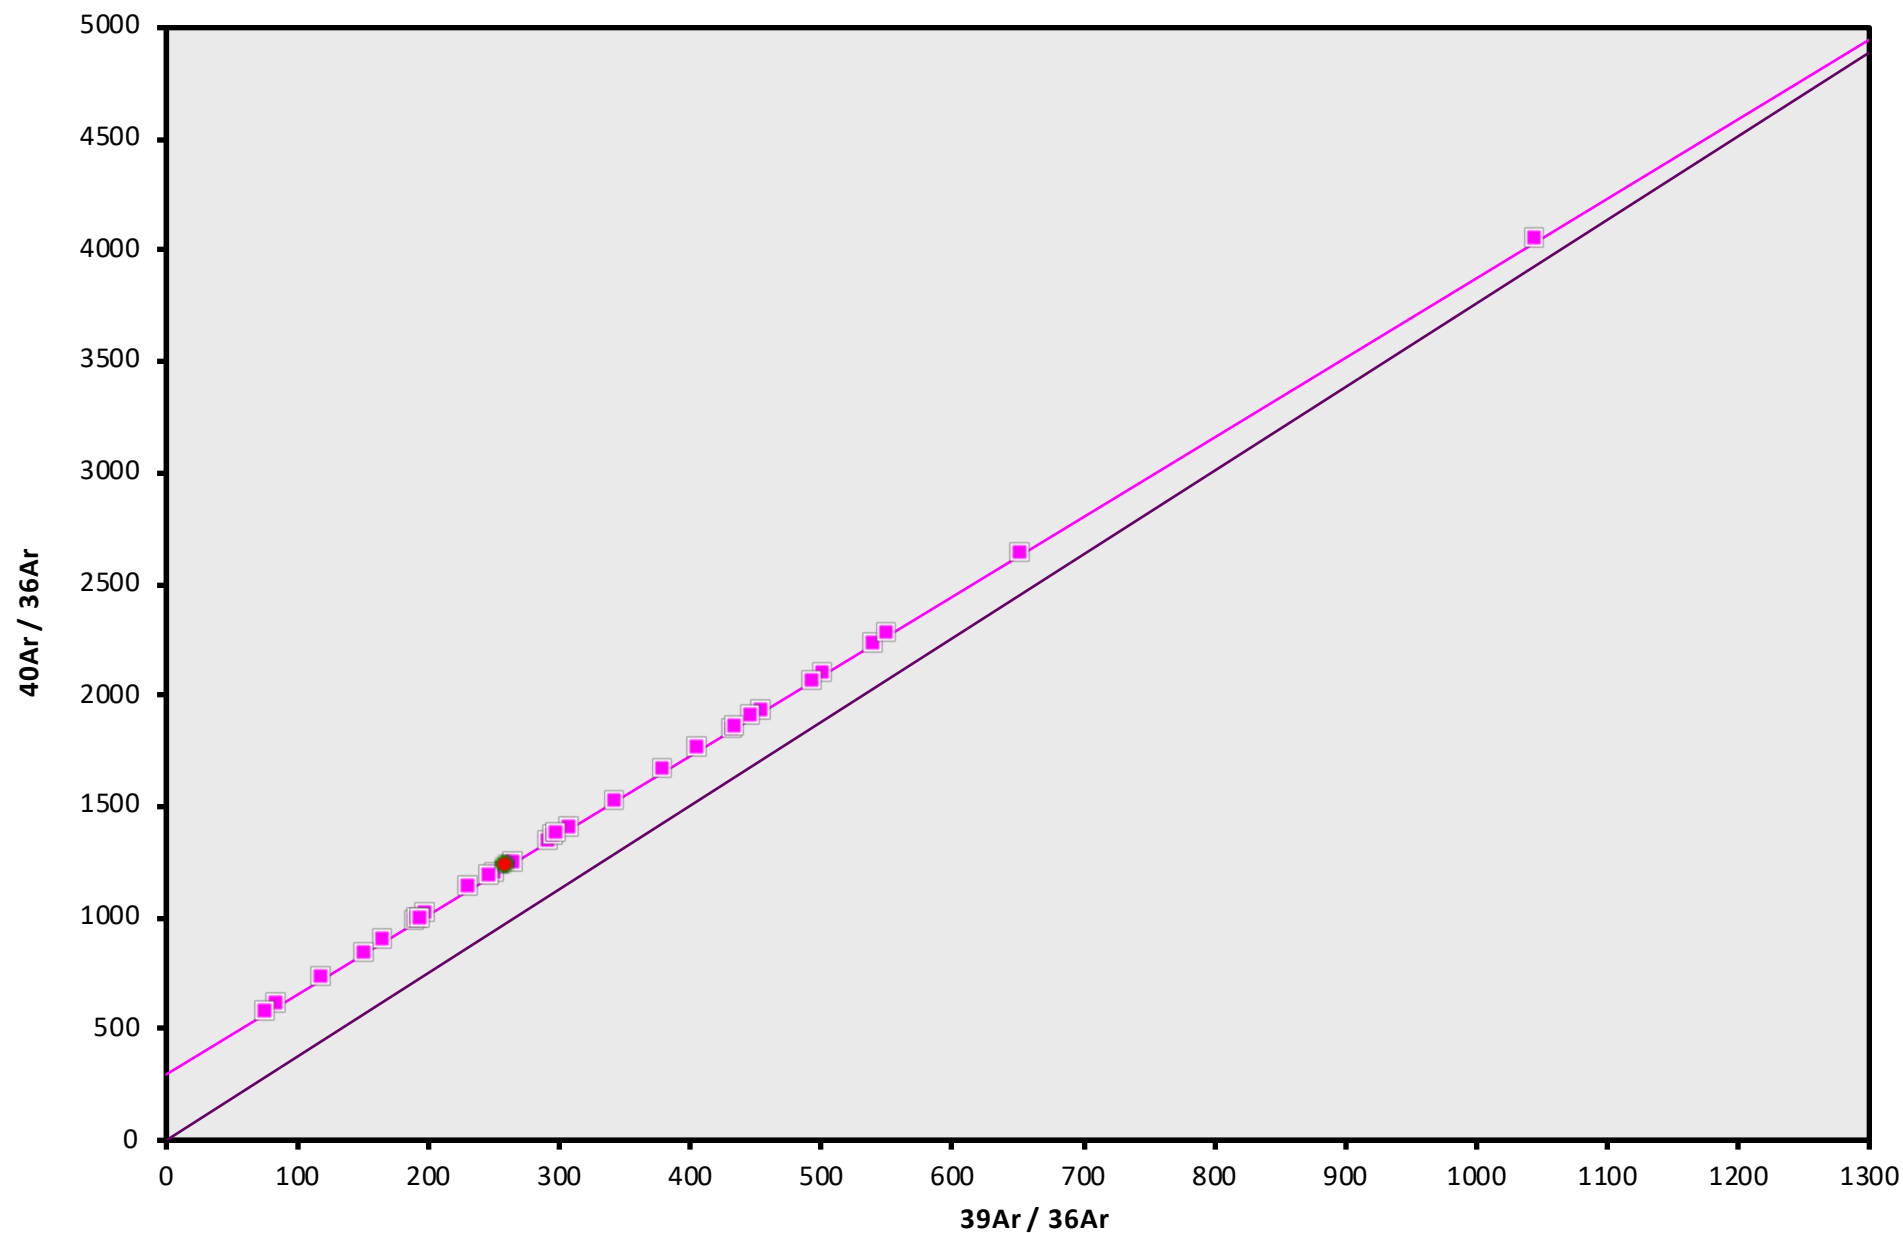

Ar-Ages in Ma

WEIGHTED PLATEAU

$10.76 \pm 0.03$

TOTAL FUSION

$10.76 \pm 0.03$

NORMAL ISOCHRON

$10.78 \pm 0.03$

INVERSE ISOCHRON

$10.78 \pm 0.03$

MSWD (PROBABILITY)

7.68 (0%)

CALCULATED  $^{40}\text{Ar}/^{36}\text{Ar}$

Sample Info

Biotite

Circle Bar

Dan Miggins

IRR = 21-OSU-04 (4X11-

21F16448.AGE >>> VS19-085 >>> OREGON | SWENTON (20-01) PROJECT

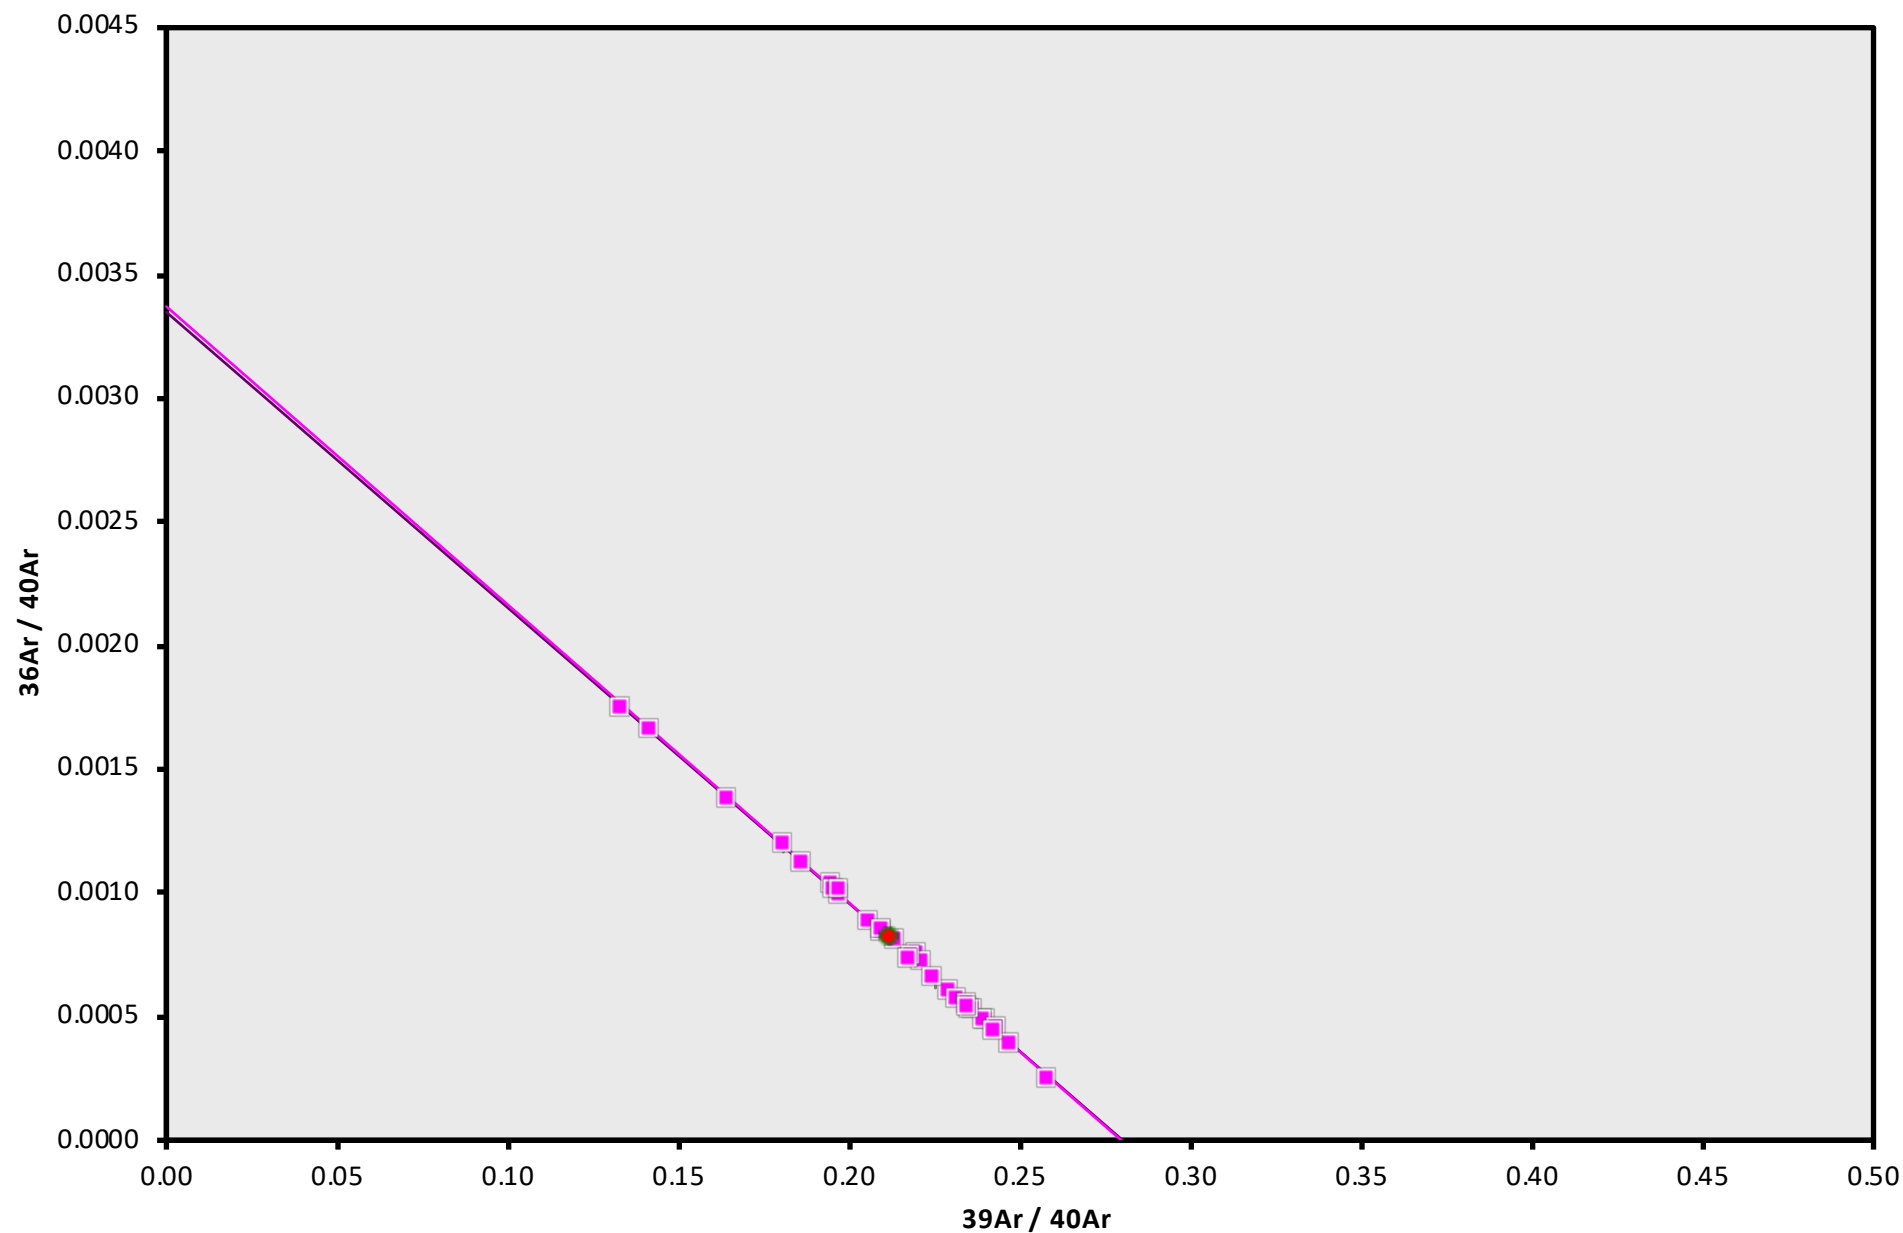

Ar-Ages in Ma

WEIGHTED PLATEAU

$10.76 \pm 0.03$

TOTAL FUSION

$10.76 \pm 0.03$

NORMAL ISOCHRON

$10.78 \pm 0.03$

INVERSE ISOCHRON

$10.78 \pm 0.03$

MSWD (PROBABILITY)

7.45 (0%)

SPREADING FACTOR

Sample Info

Biotite

Circle Bar

Dan Miggins

IRR = 21-OSU-04 (4X11-

| Relative Abundances |        |   | 36Ar<br>[fA] | %1σ   | 37Ar<br>[fA] | %1σ     | 38Ar<br>[fA] | %1σ   | 39Ar<br>[fA] | %1σ   | 40Ar<br>[fA] | %1σ   | 40(r)/39(k) ± 2σ | Age ± 2σ<br>(Ma) | 40Ar(r)<br>(%) | 39Ar(k)<br>(%) | K/Ca ± 2σ       |
|---------------------|--------|---|--------------|-------|--------------|---------|--------------|-------|--------------|-------|--------------|-------|------------------|------------------|----------------|----------------|-----------------|
| 21F16395            | 24.0 % | ✓ | 0.2773557    | 0.380 | 0.695314     | 6.114   | 0.2689238    | 3.620 | 16.68311     | 0.073 | 142.2688     | 0.018 | 3.56706 ±0.03953 | 10.76 ±0.12      | 41.83          | 2.90           | 10.3 ±1.3       |
| 21F16396            | 24.0 % | ✓ | 0.5777108    | 0.260 | 0.258324     | 16.408  | 0.3273427    | 2.838 | 17.50557     | 0.074 | 233.1439     | 0.013 | 3.46596 ±0.05549 | 10.46 ±0.17      | 26.02          | 3.04           | 29.1 ±9.6       |
| 21F16398            | 24.0 % | ✓ | 0.3399260    | 0.349 | 3.993043     | 1.123   | 0.4605538    | 2.045 | 30.84800     | 0.055 | 210.8278     | 0.015 | 3.55462 ±0.02437 | 10.73 ±0.07      | 52.01          | 5.37           | 3.3 ±0.1        |
| 21F16399            | 24.0 % | ✓ | 0.5054299    | 0.286 | 7.507925     | 0.630   | 0.6410632    | 1.322 | 43.38437     | 0.047 | 308.4465     | 0.011 | 3.64517 ±0.02153 | 11.00 ±0.06      | 51.27          | 7.55           | 2.5 ±0.0        |
| 21F16401            | 24.0 % | ✓ | 0.2053206    | 0.414 | 4.160702     | 1.084   | 0.3344145    | 2.818 | 22.56751     | 0.063 | 142.6062     | 0.018 | 3.61751 ±0.02373 | 10.91 ±0.07      | 57.24          | 3.92           | 2.3 ±0.1        |
| 21F16402            | 24.0 % | ✓ | 0.1634304    | 0.468 | 0.198075     | 22.050  | 0.2201089    | 4.419 | 13.94717     | 0.083 | 97.8790      | 0.027 | 3.52000 ±0.03428 | 10.62 ±0.10      | 50.16          | 2.43           | 30.3 ±13.4      |
| 21F16404            | 24.0 % | ✓ | 0.4922457    | 0.277 | 0.102847     | 41.330  | 0.2188464    | 4.507 | 11.10770     | 0.101 | 186.6864     | 0.015 | 3.57620 ±0.07868 | 10.79 ±0.24      | 21.28          | 1.93           | 46.4 ±38.4      |
| 21F16405            | 24.0 % | ✓ | 0.1971700    | 0.447 | 1.867709     | 2.296   | 0.3042058    | 3.235 | 22.40389     | 0.061 | 138.4961     | 0.020 | 3.56056 ±0.02463 | 10.74 ±0.07      | 57.59          | 3.90           | 5.2 ±0.2        |
| 21F16407            | 24.0 % | ✓ | 0.2899294    | 0.357 | 2.737575     | 1.611   | 0.2559090    | 3.699 | 15.82138     | 0.073 | 143.0597     | 0.020 | 3.58479 ±0.04124 | 10.82 ±0.12      | 39.64          | 2.75           | 2.5 ±0.1        |
| 21F16408            | 24.0 % | ✓ | 0.2158989    | 0.433 | 0.216155     | 20.978  | 0.3746991    | 2.619 | 27.82350     | 0.056 | 163.0357     | 0.018 | 3.54298 ±0.02113 | 10.69 ±0.06      | 60.46          | 4.84           | 55.3 ±23.2      |
| 21F16410            | 24.0 % | ✓ | 1.9887548    | 0.194 | 0.535455     | 8.463   | 0.6264524    | 1.356 | 18.32241     | 0.070 | 654.8576     | 0.006 | 3.33631 ±0.14268 | 10.07 ±0.43      | 9.33           | 3.19           | 14.7 ±2.5       |
| 21F16411            | 24.0 % | ✓ | 0.1695724    | 0.449 | 0.332550     | 12.901  | 0.1895620    | 4.760 | 12.62407     | 0.087 | 93.9927      | 0.028 | 3.43671 ±0.03769 | 10.37 ±0.11      | 46.16          | 2.20           | 16.3 ±4.2       |
| 21F16413            | 24.0 % | ✓ | 0.1895634    | 0.414 | 1.169768     | 3.748   | 0.3068004    | 2.959 | 21.17713     | 0.066 | 131.3134     | 0.024 | 3.53221 ±0.02349 | 10.66 ±0.07      | 56.96          | 3.68           | 7.8 ±0.6        |
| 21F16414            | 24.0 % | ✓ | 0.2279024    | 0.392 | 2.231710     | 2.000   | 0.2835558    | 3.164 | 17.54559     | 0.070 | 129.2657     | 0.022 | 3.49938 ±0.03200 | 10.56 ±0.10      | 47.49          | 3.05           | 3.4 ±0.1        |
| 21F16416            | 24.0 % | ✓ | 0.1594358    | 0.495 | 0.708846     | 6.054   | 0.1481356    | 6.506 | 8.00648      | 0.127 | 75.6263      | 0.032 | 3.50715 ±0.06109 | 10.58 ±0.18      | 37.13          | 1.39           | 4.9 ±0.6        |
| 21F16417            | 24.0 % | ✓ | 0.2137469    | 0.372 | 0.871938     | 4.904   | 0.3809163    | 2.496 | 26.00771     | 0.056 | 155.5815     | 0.018 | 3.53060 ±0.01950 | 10.65 ±0.06      | 59.02          | 4.52           | 12.8 ±1.3       |
| 21F16419            | 24.0 % | ✓ | 0.1180516    | 0.619 | 0.239230     | 16.958  | 0.2276718    | 4.142 | 14.91745     | 0.076 | 87.3426      | 0.029 | 3.49315 ±0.03035 | 10.54 ±0.09      | 59.66          | 2.59           | 26.8 ±9.1       |
| 21F16420            | 24.0 % | ✓ | 0.5807750    | 0.260 | 0.215727     | 18.842  | 0.2388326    | 3.892 | 10.49188     | 0.104 | 208.8051     | 0.014 | 3.37600 ±0.09300 | 10.19 ±0.28      | 16.96          | 1.82           | 20.9 ±7.9       |
| 21F16422            | 24.0 % | ✓ | 0.3820800    | 0.333 | 0.278559     | 15.381  | 0.3931251    | 2.546 | 25.53187     | 0.061 | 204.3150     | 0.013 | 3.53477 ±0.03151 | 10.67 ±0.09      | 44.17          | 4.44           | 39.4 ±12.1      |
| 21F16423            | 24.0 % | ✓ | 0.1609412    | 0.461 | 0.114305     | 36.154  | 0.1762469    | 6.028 | 13.51113     | 0.084 | 95.9280      | 0.025 | 3.54365 ±0.03434 | 10.69 ±0.10      | 49.91          | 2.35           | 50.8 ±36.8      |
| 21F16425            | 24.0 % | ✓ | 0.3900339    | 0.295 | 0.039231     | 109.458 | 0.2697001    | 3.338 | 15.81129     | 0.081 | 171.2754     | 0.081 | 3.46719 ±0.04658 | 10.46 ±0.14      | 32.01          | 2.75           | 173.3 ±379.4    |
| 21F16426            | 24.0 % | ✓ | 0.3108168    | 0.329 | 0.451851     | 9.442   | 0.3290810    | 2.877 | 24.42004     | 0.061 | 176.9599     | 0.017 | 3.44738 ±0.02666 | 10.40 ±0.08      | 47.57          | 4.25           | 23.2 ±4.4       |
| 21F16428            | 24.0 % | ✓ | 0.0873776    | 0.702 | 0.852428     | 5.402   | 0.2057197    | 4.916 | 15.82638     | 0.073 | 81.4129      | 0.032 | 3.49963 ±0.02418 | 10.56 ±0.07      | 68.03          | 2.75           | 8.0 ±0.9        |
| 21F16429            | 24.0 % | ✓ | 0.0596374    | 0.950 | 0.048068     | 94.202  | 0.2042616    | 4.962 | 18.93325     | 0.068 | 84.7997      | 0.030 | 3.53806 ±0.01881 | 10.68 ±0.06      | 78.99          | 3.29           | 169.4 ±319.1    |
| 21F16431            | 24.0 % | ✓ | 0.0689374    | 0.818 | 0.096257     | 45.077  | 0.1491868    | 6.471 | 10.46261     | 0.097 | 57.3924      | 0.041 | 3.51848 ±0.03348 | 10.62 ±0.10      | 64.14          | 1.82           | 46.7 ±42.1      |
| 21F16432            | 24.0 % | ✓ | 0.1543262    | 0.469 | 0.005546     | 811.097 | 0.3104324    | 3.207 | 25.99771     | 0.056 | 138.1670     | 0.019 | 3.54170 ±0.01759 | 10.69 ±0.05      | 66.64          | 4.52           | 2015.6 ±32697.3 |
| 21F16434            | 24.0 % | ✓ | 0.4156565    | 0.305 | 0.354668     | 11.142  | 0.3261060    | 2.741 | 19.02676     | 0.067 | 189.0648     | 0.016 | 3.41545 ±0.04243 | 10.31 ±0.13      | 34.37          | 3.31           | 23.1 ±5.1       |
| 21F16435            | 24.0 % | ✓ | 0.1330580    | 0.480 | 0.081798     | 51.522  | 0.2196458    | 4.284 | 20.90740     | 0.066 | 113.3475     | 0.024 | 3.52104 ±0.01940 | 10.62 ±0.06      | 64.95          | 3.64           | 109.9 ±113.3    |
| 21F16437            | 24.0 % | ✓ | 0.1629634    | 0.484 | 0.161657     | 28.017  | 0.1513776    | 6.400 | 9.15632      | 0.105 | 80.7456      | 0.032 | 3.50572 ±0.05344 | 10.58 ±0.16      | 39.75          | 1.59           | 24.4 ±13.6      |
| 21F16438            | 24.0 % | ✓ | 0.2729043    | 0.349 | 0.115542     | 36.128  | 0.2650999    | 3.549 | 24.16016     | 0.060 | 166.0066     | 0.016 | 3.49845 ±0.02502 | 10.56 ±0.08      | 50.92          | 4.20           | 89.9 ±65.0      |
| Σ                   |        |   | 9.5109526    | 0.069 | 30.642806    | 0.777   | 8.8079769    | 0.591 | 574.92984    | 0.013 | 4862.6495    | 0.003 |                  |                  |                |                |                 |

| Information on Analysis and Constants Used in Calculations |                                                               |
|------------------------------------------------------------|---------------------------------------------------------------|
| Project = <b>SWENTON (20-01)</b>                           | Age Equations = <b>Min et al. (2000)</b>                      |
| Sample = <b>VS19-089</b>                                   | Negative Intensities = <b>Allowed</b>                         |
| Material = <b>Biotite</b>                                  | Collector Calibrations = <b>36Ar</b>                          |
| Location = <b>Circle Bar</b>                               | Decay 40K = <b>5.463 ±0.107 E-10 1/a</b>                      |
| Region = <b>Eastern Oregon</b>                             | Decay 39Ar = <b>2.940 ±0.016 E-07 1/h</b>                     |
| Analyst = <b>Dan Miggins</b>                               | Decay 37Ar = <b>8.230 ±0.012 E-04 1/h</b>                     |
| Irradiation = <b>21-OSU-04 (4X9-21)</b>                    | Decay 36Cl = <b>2.257 ±0.015 E-06 1/a</b>                     |
| Position = <b>X: 0   Y: 0   Z/H: 8.889026 mm</b>           | Decay 40K(EC, β <sup>+</sup> ) = <b>0.580 ±0.014 E-10 1/a</b> |
| FCT-NM Age = <b>28.201 ±0.023 Ma</b>                       | Decay 40K(β <sup>-</sup> ) = <b>4.884 ±0.099 E-10 1/a</b>     |
| FCT-NM Reference = <b>Kuiper et al (2008)</b>              | Atmospheric 40/36(a) = <b>298.56 ±0.31</b>                    |
| FCT-NM 40Ar/39Ar Ratio = <b>9.39104 ±0.01061</b>           | Atmospheric 38/36(a) = <b>0.1885 ±0.0003</b>                  |
| FCT-NMJ-value = <b>0.00165322 ±0.00000187</b>              | Production 39/37(ca) = <b>0.0006425 ±0.0000059</b>            |
| Air Shot 40Ar/36Ar = <b>300.4600 ±0.3606</b>               | Production 38/37(ca) = <b>0.0001800 ±0.0000173</b>            |
| Air Shot MDF = <b>0.99841705 ±0.00039499 (LIN)</b>         | Production 36/37(ca) = <b>0.0002703 ±0.0000005</b>            |
| Experiment Type = <b>Total Fusion</b>                      | Production 40/39(k) = <b>0.000607 ±0.000059</b>               |
| Extraction Method = <b>Single Crystal Laser Heating</b>    | Production 38/39(k) = <b>0.012077 ±0.000011</b>               |
| Heating = <b>62 sec</b>                                    | Production 36/38(cl) = <b>262.80 ±1.71</b>                    |
| Isolation = <b>3.00 min</b>                                | Scaling Ratio K/Ca = <b>0.430</b>                             |
| Instrument = <b>ARGUS-VI-F</b>                             | Abundance Ratio 40K/K = <b>1.1700 ±0.0100 E-04</b>            |
| Preferred Age = <b>Ideogram Age</b>                        | Atomic Weight K = <b>39.0983 ±0.0001 g</b>                    |
| Age Classification = <b>Eruption Age</b>                   |                                                               |
| IGSN = <b>Undefined</b>                                    |                                                               |
| Rock Class = <b>Undefined</b>                              |                                                               |
| Lithology = <b>Undefined</b>                               |                                                               |
| Lat-Lon = <b>Undefined - Undefined</b>                     |                                                               |

| Results                         | 40(a)/36(a) ± 2σ       | 40(r)/39(k) ± 2σ                        | Age ± 2σ<br>(Ma)      | M<br>SWD           | 39Ar(k)<br>(%,n)                           | K/Ca ± 2σ    |
|---------------------------------|------------------------|-----------------------------------------|-----------------------|--------------------|--------------------------------------------|--------------|
| Age Plateau<br>Error Mean       |                        | 3.53318 ±0.01781<br>±0.50%              | 10.66 ±0.06<br>±0.55% | 11.81<br>0%        | 100.00<br>30                               | 102.3 ±133.0 |
|                                 |                        | Full External Error<br>Analytical Error | ±0.56<br>±0.05        | 1.53<br>3.4372     | 2σ Confidence Limit<br>Error Magnification |              |
| Total Fusion Age                |                        | 3.52263 ±0.00744<br>±0.21%              | 10.63 ±0.03<br>±0.31% |                    | 30                                         | 8.1 ±0.1     |
|                                 |                        | Full External Error<br>Analytical Error | ±0.55<br>±0.02        |                    |                                            |              |
| Normal Isochron<br>Error Chron  | 296.75 ±2.46<br>±0.83% | 3.55008 ±0.03079<br>±0.87%              | 10.71 ±0.10<br>±0.89% | 12.33<br>0%        | 100.00<br>30                               |              |
|                                 |                        | Full External Error<br>Analytical Error | ±0.56<br>±0.09        | 1.53<br>3.5114     | 2σ Confidence Limit<br>Error Magnification |              |
|                                 |                        |                                         |                       | 21<br>0.0000340935 | Number of Iterations<br>Convergence        |              |
| Inverse Isochron<br>Error Chron | 296.79 ±2.49<br>±0.84% | 3.55157 ±0.03115<br>±0.88%              | 10.72 ±0.10<br>±0.90% | 12.58<br>0%        | 100.00<br>30                               |              |
|                                 |                        | Full External Error<br>Analytical Error | ±0.56<br>±0.09        | 1.53<br>3.5462     | 2σ Confidence Limit<br>Error Magnification |              |
|                                 |                        |                                         |                       | 2<br>0.0000742807  | Number of Iterations<br>Convergence        |              |
|                                 |                        |                                         |                       | 69%                | Spreading Factor                           |              |

| Incremental Heating |        |   | 36Ar(a)<br>[fA] | 37Ar(ca)<br>[fA] | 38Ar(cl)<br>[fA] | 39Ar(k)<br>[fA] | 40Ar(r)<br>[fA] | Age ± 2σ<br>(Ma) | 40Ar(r)<br>(%) | 39Ar(k)<br>(%) | K/Ca ± 2σ       |
|---------------------|--------|---|-----------------|------------------|------------------|-----------------|-----------------|------------------|----------------|----------------|-----------------|
| 21F16395            | 24.0 % | ✓ | 0.2771658       | 0.695314         | 0.0150763        | 16.68267        | 59.5080         | 10.76 ±0.12      | 41.83          | 2.90           | 10.3 ±1.3       |
| 21F16396            | 24.0 % | ✓ | 0.5776400       | 0.258324         | 0.0069982        | 17.50541        | 60.6731         | 10.46 ±0.17      | 26.02          | 3.04           | 29.1 ±9.6       |
| 21F16398            | 24.0 % | ✓ | 0.3388436       | 3.993043         | 0.0234428        | 30.84543        | 109.6439        | 10.73 ±0.07      | 52.01          | 5.37           | 3.3 ±0.1        |
| 21F16399            | 24.0 % | ✓ | 0.5033979       | 7.507925         | 0.0209264        | 43.37955        | 158.1257        | 11.00 ±0.06      | 51.27          | 7.55           | 2.5 ±0.0        |
| 21F16401            | 24.0 % | ✓ | 0.2041931       | 4.160702         | 0.0226597        | 22.56483        | 81.6286         | 10.91 ±0.07      | 57.24          | 3.92           | 2.3 ±0.1        |
| 21F16402            | 24.0 % | ✓ | 0.1633742       | 0.198075         | 0.0208388        | 13.94704        | 49.0936         | 10.62 ±0.10      | 50.16          | 2.43           | 30.3 ±13.4      |
| 21F16404            | 24.0 % | ✓ | 0.4922179       | 0.102847         | 0.0000000        | 11.10764        | 39.7231         | 10.79 ±0.24      | 21.28          | 1.93           | 46.4 ±38.4      |
| 21F16405            | 24.0 % | ✓ | 0.1966652       | 1.867709         | 0.0000000        | 22.40269        | 79.7661         | 10.74 ±0.07      | 57.59          | 3.90           | 5.2 ±0.2        |
| 21F16407            | 24.0 % | ✓ | 0.2891882       | 2.737575         | 0.0098507        | 15.81962        | 56.7100         | 10.82 ±0.12      | 39.64          | 2.75           | 2.5 ±0.1        |
| 21F16408            | 24.0 % | ✓ | 0.2158404       | 0.216155         | 0.0000000        | 27.82336        | 98.5775         | 10.69 ±0.06      | 60.46          | 4.84           | 55.3 ±23.2      |
| 21F16410            | 24.0 % | ✓ | 1.9886062       | 0.535455         | 0.0302281        | 18.32207        | 61.1282         | 10.07 ±0.43      | 9.33           | 3.19           | 14.7 ±2.5       |
| 21F16411            | 24.0 % | ✓ | 0.1694818       | 0.332550         | 0.0050965        | 12.62385        | 43.3845         | 10.37 ±0.11      | 46.16          | 2.20           | 16.3 ±4.2       |
| 21F16413            | 24.0 % | ✓ | 0.1892453       | 1.169768         | 0.0151700        | 21.17638        | 74.7994         | 10.66 ±0.07      | 56.96          | 3.68           | 7.8 ±0.6        |
| 21F16414            | 24.0 % | ✓ | 0.2272955       | 2.231710         | 0.0284281        | 17.54416        | 61.3937         | 10.56 ±0.10      | 47.49          | 3.05           | 3.4 ±0.1        |
| 21F16416            | 24.0 % | ✓ | 0.1592414       | 0.708846         | 0.0213023        | 8.00602         | 28.0783         | 10.58 ±0.18      | 37.13          | 1.39           | 4.9 ±0.6        |
| 21F16417            | 24.0 % | ✓ | 0.2135078       | 0.871938         | 0.0264247        | 26.00715        | 91.8208         | 10.65 ±0.06      | 59.02          | 4.52           | 12.8 ±1.3       |
| 21F16419            | 24.0 % | ✓ | 0.1179837       | 0.239230         | 0.0252326        | 14.91730        | 52.1083         | 10.54 ±0.09      | 59.66          | 2.59           | 26.8 ±9.1       |
| 21F16420            | 24.0 % | ✓ | 0.5807164       | 0.215727         | 0.0026199        | 10.49175        | 35.4201         | 10.19 ±0.28      | 16.96          | 1.82           | 20.9 ±7.9       |
| 21F16422            | 24.0 % | ✓ | 0.3820030       | 0.278559         | 0.0127212        | 25.53169        | 90.2486         | 10.67 ±0.09      | 44.17          | 4.44           | 39.4 ±12.1      |
| 21F16423            | 24.0 % | ✓ | 0.1609103       | 0.114305         | 0.0000000        | 13.51105        | 47.8784         | 10.69 ±0.10      | 49.91          | 2.35           | 50.8 ±36.8      |
| 21F16425            | 24.0 % | ✓ | 0.3900226       | 0.039231         | 0.0052211        | 15.81127        | 54.8206         | 10.46 ±0.14      | 32.01          | 2.75           | 173.3 ±379.4    |
| 21F16426            | 24.0 % | ✓ | 0.3106946       | 0.451851         | 0.0000000        | 24.41975        | 84.1841         | 10.40 ±0.08      | 47.57          | 4.25           | 23.2 ±4.4       |
| 21F16428            | 24.0 % | ✓ | 0.0871472       | 0.852428         | 0.0000000        | 15.82584        | 55.3846         | 10.56 ±0.07      | 68.03          | 2.75           | 8.0 ±0.9        |
| 21F16429            | 24.0 % | ✓ | 0.0596245       | 0.048068         | 0.0000000        | 18.93322        | 66.9868         | 10.68 ±0.06      | 78.99          | 3.29           | 169.4 ±319.1    |
| 21F16431            | 24.0 % | ✓ | 0.0689101       | 0.096257         | 0.0098237        | 10.46255        | 36.8122         | 10.62 ±0.10      | 64.14          | 1.82           | 46.7 ±42.1      |
| 21F16432            | 24.0 % | ✓ | 0.1543247       | 0.005546         | 0.0000000        | 25.99770        | 92.0760         | 10.69 ±0.05      | 66.64          | 4.52           | 2015.6 ±32697.3 |
| 21F16434            | 24.0 % | ✓ | 0.4155584       | 0.354668         | 0.0179259        | 19.02653        | 64.9842         | 10.31 ±0.13      | 34.37          | 3.31           | 23.1 ±5.1       |
| 21F16435            | 24.0 % | ✓ | 0.1330359       | 0.081798         | 0.0000000        | 20.90735        | 73.6156         | 10.62 ±0.06      | 64.95          | 3.64           | 109.9 ±113.3    |
| 21F16437            | 24.0 % | ✓ | 0.1629184       | 0.161657         | 0.0100588        | 9.15622         | 32.0991         | 10.58 ±0.16      | 39.75          | 1.59           | 24.4 ±13.6      |
| 21F16438            | 24.0 % | ✓ | 0.2728731       | 0.115542         | 0.0000000        | 24.16008        | 84.5229         | 10.56 ±0.08      | 50.92          | 4.20           | 89.9 ±65.0      |
| Σ                   |        |   | 9.5026272       | 30.642806        | 0.3300459        | 574.91015       | 2025.1962       |                  |                |                |                 |

| Information on Analysis                                                                                                                                                                                                                            | Results     | 40(r)/39(k) ± 2σ | Age ± 2σ<br>(Ma)    | MSWD   | 39Ar(k)<br>(%,n)    | K/Ca ± 2σ    |
|----------------------------------------------------------------------------------------------------------------------------------------------------------------------------------------------------------------------------------------------------|-------------|------------------|---------------------|--------|---------------------|--------------|
| Project = SWENTON (20-01)<br>Sample = VS19-089<br>Material = Biotite<br>Location = Circle Bar<br>Region = Eastern Oregon<br>Analyst = Dan Miggins<br>Irradiation = 21-OSU-04 (4X9-21)<br>J = 0.00165322 ± 0.00000187<br>FCT-NM = 28.201 ± 0.023 Ma | Age Plateau | 3.53318          | ±0.01781            | 11.81  | 100.00              | 102.3 ±133.0 |
|                                                                                                                                                                                                                                                    | Error Mean  |                  | ±0.50%              | 0%     | 30                  |              |
|                                                                                                                                                                                                                                                    |             |                  | Full External Error | 1.53   | 2σ Confidence Limit |              |
|                                                                                                                                                                                                                                                    |             |                  | Analytical Error    | 3.4372 | Error Magnification |              |
|                                                                                                                                                                                                                                                    |             |                  | ±0.05               |        |                     |              |
| Total Fusion Age                                                                                                                                                                                                                                   |             | 3.52263          | ±0.00744            |        | 30                  | 8.1 ±0.1     |
|                                                                                                                                                                                                                                                    |             |                  | ±0.21%              |        |                     |              |
|                                                                                                                                                                                                                                                    |             |                  | Full External Error |        |                     |              |
|                                                                                                                                                                                                                                                    |             |                  | Analytical Error    |        |                     |              |
|                                                                                                                                                                                                                                                    |             |                  | ±0.02               |        |                     |              |

| Normal Isochron |        |   | 39(k)/36(a) ± 2σ | 40(a+r)/36(a) ± 2σ | r.i.   |
|-----------------|--------|---|------------------|--------------------|--------|
| 21F16395        | 24.0 % | ✓ | 60.19 ±0.47      | 513.26 ±3.90       | 0.9811 |
| 21F16396        | 24.0 % | ✓ | 30.31 ±0.16      | 403.60 ±2.10       | 0.9609 |
| 21F16398        | 24.0 % | ✓ | 91.03 ±0.65      | 622.14 ±4.36       | 0.9871 |
| 21F16399        | 24.0 % | ✓ | 86.17 ±0.50      | 612.68 ±3.53       | 0.9861 |
| 21F16401        | 24.0 % | ✓ | 110.51 ±0.93     | 698.32 ±5.82       | 0.9879 |
| 21F16402        | 24.0 % | ✓ | 85.37 ±0.81      | 599.06 ±5.62       | 0.9829 |
| 21F16404        | 24.0 % | ✓ | 22.57 ±0.13      | 379.26 ±2.10       | 0.9382 |
| 21F16405        | 24.0 % | ✓ | 113.91 ±1.03     | 704.15 ±6.32       | 0.9898 |
| 21F16407        | 24.0 % | ✓ | 54.70 ±0.40      | 494.66 ±3.55       | 0.9781 |
| 21F16408        | 24.0 % | ✓ | 128.91 ±1.13     | 755.27 ±6.55       | 0.9908 |
| 21F16410        | 24.0 % | ✓ | 9.21 ±0.04       | 329.30 ±1.28       | 0.9407 |
| 21F16411        | 24.0 % | ✓ | 74.49 ±0.68      | 554.54 ±4.99       | 0.9797 |
| 21F16413        | 24.0 % | ✓ | 111.90 ±0.94     | 693.81 ±5.77       | 0.9858 |
| 21F16414        | 24.0 % | ✓ | 77.19 ±0.62      | 568.67 ±4.48       | 0.9829 |
| 21F16416        | 24.0 % | ✓ | 50.28 ±0.51      | 474.89 ±4.72       | 0.9667 |
| 21F16417        | 24.0 % | ✓ | 121.81 ±0.92     | 728.62 ±5.44       | 0.9878 |
| 21F16419        | 24.0 % | ✓ | 126.44 ±1.58     | 740.22 ±9.19       | 0.9915 |
| 21F16420        | 24.0 % | ✓ | 18.07 ±0.10      | 359.55 ±1.87       | 0.9275 |
| 21F16422        | 24.0 % | ✓ | 66.84 ±0.45      | 534.81 ±3.56       | 0.9831 |
| 21F16423        | 24.0 % | ✓ | 83.97 ±0.79      | 596.11 ±5.51       | 0.9822 |
| 21F16425        | 24.0 % | ✓ | 40.54 ±0.25      | 439.12 ±2.60       | 0.9625 |
| 21F16426        | 24.0 % | ✓ | 78.60 ±0.53      | 569.51 ±3.75       | 0.9821 |
| 21F16428        | 24.0 % | ✓ | 181.60 ±2.57     | 934.09 ±13.17      | 0.9937 |
| 21F16429        | 24.0 % | ✓ | 317.54 ±6.05     | 1422.04 ±27.06     | 0.9970 |
| 21F16431        | 24.0 % | ✓ | 151.83 ±2.50     | 832.77 ±13.66      | 0.9918 |
| 21F16432        | 24.0 % | ✓ | 168.46 ±1.59     | 895.20 ±8.40       | 0.9921 |
| 21F16434        | 24.0 % | ✓ | 45.79 ±0.29      | 454.94 ±2.78       | 0.9752 |
| 21F16435        | 24.0 % | ✓ | 157.16 ±1.52     | 851.91 ±8.18       | 0.9893 |
| 21F16437        | 24.0 % | ✓ | 56.20 ±0.56      | 495.59 ±4.81       | 0.9752 |
| 21F16438        | 24.0 % | ✓ | 88.54 ±0.63      | 608.31 ±4.25       | 0.9844 |

| Results         | 40(a)/36(a) ± 2σ      | 40(r)/39(k) ± 2σ | Age ± 2σ (Ma)             | MSWD            |
|-----------------|-----------------------|------------------|---------------------------|-----------------|
| Normal Isochron | 296.75 ±2.46          | 3.55008 ±0.03079 | 10.71 ±0.10               | 12.33           |
| Error Chron     | ±0.83%                | ±0.87%           | ±0.89%                    | 0%              |
|                 |                       |                  | Full External Error ±0.56 |                 |
|                 |                       |                  | Analytical Error ±0.09    |                 |
|                 |                       |                  |                           |                 |
| Statistics      | 2σ Confidence Limit   | 1.53             | Convergence               | 0.000034093514  |
|                 | Error Magnification   | 3.5114           | Number of Iterations      | 21              |
|                 | Number of Data Points | 30               | Calculated Line           | Weighted York-2 |



| Inverse Isochron |        |   | 39(k)/40(a+r) ± 2σ |            | 36(a)/40(a+r) ± 2σ |             | r.i.   |
|------------------|--------|---|--------------------|------------|--------------------|-------------|--------|
| 21F16395         | 24.0 % | ✓ | 0.1172700          | ±0.0001755 | 0.00194832         | ±0.00001482 | 0.0117 |
| 21F16396         | 24.0 % | ✓ | 0.0750876          | ±0.0001123 | 0.00247772         | ±0.00001289 | 0.0092 |
| 21F16398         | 24.0 % | ✓ | 0.1463193          | ±0.0001660 | 0.00160735         | ±0.00001127 | 0.0115 |
| 21F16399         | 24.0 % | ✓ | 0.1406508          | ±0.0001363 | 0.00163218         | ±0.00000940 | 0.0089 |
| 21F16401         | 24.0 % | ✓ | 0.1582470          | ±0.0002064 | 0.00143200         | ±0.00001193 | 0.0126 |
| 21F16402         | 24.0 % | ✓ | 0.1425049          | ±0.0002499 | 0.00166929         | ±0.00001566 | 0.0183 |
| 21F16404         | 24.0 % | ✓ | 0.0595011          | ±0.0001213 | 0.00263670         | ±0.00001461 | 0.0077 |
| 21F16405         | 24.0 % | ✓ | 0.1617727          | ±0.0002088 | 0.00142015         | ±0.00001274 | 0.0141 |
| 21F16407         | 24.0 % | ✓ | 0.1105880          | ±0.0001684 | 0.00202159         | ±0.00001452 | 0.0152 |
| 21F16408         | 24.0 % | ✓ | 0.1706758          | ±0.0002015 | 0.00132402         | ±0.00001148 | 0.0133 |
| 21F16410         | 24.0 % | ✓ | 0.0279792          | ±0.0000391 | 0.00303675         | ±0.00001178 | 0.0026 |
| 21F16411         | 24.0 % | ✓ | 0.1343177          | ±0.0002465 | 0.00180329         | ±0.00001624 | 0.0190 |
| 21F16413         | 24.0 % | ✓ | 0.1612817          | ±0.0002274 | 0.00144131         | ±0.00001198 | 0.0196 |
| 21F16414         | 24.0 % | ✓ | 0.1357329          | ±0.0001997 | 0.00175850         | ±0.00001384 | 0.0165 |
| 21F16416         | 24.0 % | ✓ | 0.1058698          | ±0.0002770 | 0.00210577         | ±0.00002091 | 0.0158 |
| 21F16417         | 24.0 % | ✓ | 0.1671779          | ±0.0001966 | 0.00137246         | ±0.00001025 | 0.0149 |
| 21F16419         | 24.0 % | ✓ | 0.1708083          | ±0.0002782 | 0.00135095         | ±0.00001677 | 0.0162 |
| 21F16420         | 24.0 % | ✓ | 0.0502481          | ±0.0001052 | 0.00278123         | ±0.00001449 | 0.0075 |
| 21F16422         | 24.0 % | ✓ | 0.1249719          | ±0.0001547 | 0.00186982         | ±0.00001245 | 0.0081 |
| 21F16423         | 24.0 % | ✓ | 0.1408579          | ±0.0002480 | 0.00167755         | ±0.00001550 | 0.0158 |
| 21F16425         | 24.0 % | ✓ | 0.0923201          | ±0.0001532 | 0.00227729         | ±0.00001346 | 0.0128 |
| 21F16426         | 24.0 % | ✓ | 0.1380075          | ±0.0001740 | 0.00175588         | ±0.00001157 | 0.0140 |
| 21F16428         | 24.0 % | ✓ | 0.1944128          | ±0.0003089 | 0.00107056         | ±0.00001509 | 0.0183 |
| 21F16429         | 24.0 % | ✓ | 0.2233000          | ±0.0003312 | 0.00070322         | ±0.00001338 | 0.0129 |
| 21F16431         | 24.0 % | ✓ | 0.1823188          | ±0.0003841 | 0.00120082         | ±0.00001969 | 0.0191 |
| 21F16432         | 24.0 % | ✓ | 0.1881830          | ±0.0002223 | 0.00111707         | ±0.00001048 | 0.0135 |
| 21F16434         | 24.0 % | ✓ | 0.1006411          | ±0.0001393 | 0.00219810         | ±0.00001344 | 0.0121 |
| 21F16435         | 24.0 % | ✓ | 0.1844743          | ±0.0002603 | 0.00117383         | ±0.00001128 | 0.0170 |
| 21F16437         | 24.0 % | ✓ | 0.1134037          | ±0.0002489 | 0.00201781         | ±0.00001959 | 0.0193 |
| 21F16438         | 24.0 % | ✓ | 0.1455498          | ±0.0001813 | 0.00164389         | ±0.00001149 | 0.0115 |

| Results          | 40(a)/36(a) ± 2σ      |        | 40(r)/39(k) ± 2σ     |                           | Age ± 2σ (Ma)   | MSWD  |
|------------------|-----------------------|--------|----------------------|---------------------------|-----------------|-------|
| Inverse Isochron | 296.79                | ±2.49  | 3.55157              | ±0.03115                  | 10.72 ±0.10     | 12.58 |
| Error Chron      |                       | ±0.84% |                      | ±0.88%                    | ±0.90%          | 0%    |
|                  |                       |        |                      | Full External Error ±0.56 |                 |       |
|                  |                       |        |                      | Analytical Error ±0.09    |                 |       |
|                  |                       |        |                      |                           |                 |       |
| Statistics       | 2σ Confidence Limit   | 1.53   | Convergence          |                           | 0.0000742807    |       |
|                  | Error Magnification   | 3.5462 | Number of Iterations |                           | 2               |       |
|                  | Number of Data Points | 30     | Calculated Line      |                           | Weighted York-2 |       |
|                  | Spreading Factor      | 69.4%  |                      |                           |                 |       |

| Degassing<br>Patterns |        | 36Ar(a)<br>[fA] |           | %1σ  | 36Ar(c)<br>[fA] | %1σ  | 36Ar(ca)<br>[fA] | %1σ    | 36Ar(cl)<br>[fA] | %1σ    | 37Ar(ca)<br>[fA] | %1σ    | 38Ar(a)<br>[fA] | %1σ  | 38Ar(c)<br>[fA] | %1σ  | 38Ar(k)<br>[fA] | %1σ  | 38Ar(ca)<br>[fA] | %1σ    | 38Ar(cl)<br>[fA] | %1σ    | 39Ar(k)<br>[fA] | %1σ  | 39Ar(ca)<br>[fA] | %1σ    | 40Ar(r)<br>[fA] | %1σ  | 40Ar(a)<br>[fA] | %1σ  | 40Ar(c)<br>[fA] | %1σ  | 40Ar(k)<br>[fA] | %1σ  |
|-----------------------|--------|-----------------|-----------|------|-----------------|------|------------------|--------|------------------|--------|------------------|--------|-----------------|------|-----------------|------|-----------------|------|------------------|--------|------------------|--------|-----------------|------|------------------|--------|-----------------|------|-----------------|------|-----------------|------|-----------------|------|
|                       |        |                 |           |      |                 |      |                  |        |                  |        |                  |        |                 |      |                 |      |                 |      |                  |        |                  |        |                 |      |                  |        |                 |      |                 |      |                 |      |                 |      |
| 21F16395              | 24.0 % | ✓               | 0.2771658 | 0.38 | 0.0000000       | 0.00 | 0.0001879        | 6.12   | 0.0000019        | 64.71  | 0.695314         | 6.11   | 0.0522458       | 0.41 | 0.0000000       | 0.00 | 0.2014766       | 0.12 | 0.0001252        | 11.41  | 0.0150763        | 64.72  | 16.68267        | 0.07 | 0.0004467        | 6.18   | 59.5080         | 0.55 | 82.7506         | 0.39 | 0.0000000       | 0.00 | 0.0101264       | 9.65 |
| 21F16396              | 24.0 % | ✓               | 0.5776400 | 0.26 | 0.0000000       | 0.00 | 0.0000698        | 16.41  | 0.0000009        | 133.17 | 0.258324         | 16.41  | 0.1088851       | 0.30 | 0.0000000       | 0.00 | 0.2114128       | 0.12 | 0.0000465        | 19.03  | 0.0069982        | 133.17 | 17.50541        | 0.07 | 0.0001660        | 16.43  | 60.6731         | 0.80 | 172.4602        | 0.28 | 0.0000000       | 0.00 | 0.0106258       | 9.65 |
| 21F16398              | 24.0 % | ✓               | 0.3388436 | 0.35 | 0.0000000       | 0.00 | 0.0010793        | 1.14   | 0.0000030        | 40.44  | 3.993043         | 1.12   | 0.0638720       | 0.38 | 0.0000000       | 0.00 | 0.3725203       | 0.11 | 0.0007187        | 9.70   | 0.0234428        | 40.45  | 30.84543        | 0.05 | 0.0025655        | 1.45   | 109.6439        | 0.34 | 101.1652        | 0.37 | 0.0000000       | 0.00 | 0.0187232       | 9.65 |
| 21F16399              | 24.0 % | ✓               | 0.5033979 | 0.29 | 0.0000000       | 0.00 | 0.0020294        | 0.65   | 0.0000027        | 41.10  | 7.507925         | 0.63   | 0.0948905       | 0.33 | 0.0000000       | 0.00 | 0.5238948       | 0.10 | 0.0013514        | 9.65   | 0.0209264        | 41.11  | 43.37955        | 0.05 | 0.0048238        | 1.12   | 158.1257        | 0.29 | 150.2945        | 0.31 | 0.0000000       | 0.00 | 0.0263314       | 9.65 |
| 21F16401              | 24.0 % | ✓               | 0.2041931 | 0.42 | 0.0000000       | 0.00 | 0.0011246        | 1.10   | 0.0000029        | 41.74  | 4.160702         | 1.08   | 0.0384904       | 0.45 | 0.0000000       | 0.00 | 0.2725155       | 0.11 | 0.0007489        | 9.69   | 0.0226597        | 41.75  | 22.56483        | 0.06 | 0.0026733        | 1.42   | 81.6286         | 0.32 | 60.9639         | 0.43 | 0.0000000       | 0.00 | 0.0136969       | 9.65 |
| 21F16402              | 24.0 % | ✓               | 0.1633742 | 0.47 | 0.0000000       | 0.00 | 0.0000535        | 22.05  | 0.0000027        | 46.75  | 0.198075         | 22.05  | 0.0307960       | 0.49 | 0.0000000       | 0.00 | 0.1684384       | 0.12 | 0.0000357        | 24.06  | 0.0208388        | 46.76  | 13.94704        | 0.08 | 0.0001273        | 22.07  | 49.0936         | 0.48 | 48.7770         | 0.48 | 0.0000000       | 0.00 | 0.0084659       | 9.65 |
| 21F16404              | 24.0 % | ✓               | 0.4922179 | 0.28 | 0.0000000       | 0.00 | 0.0000278        | 41.33  | 0.0000000        | 0.00   | 0.102847         | 41.33  | 0.0927831       | 0.32 | 0.0000000       | 0.00 | 0.1341470       | 0.14 | 0.0000185        | 42.44  | 0.0000000        | 0.00   | 11.10764        | 0.10 | 0.0000661        | 41.34  | 39.7231         | 1.10 | 146.9566        | 0.30 | 0.0000000       | 0.00 | 0.0067423       | 9.65 |
| 21F16405              | 24.0 % | ✓               | 0.1966652 | 0.45 | 0.0000000       | 0.00 | 0.0005048        | 2.30   | 0.0000000        | 0.00   | 1.867709         | 2.30   | 0.0370714       | 0.48 | 0.0000000       | 0.00 | 0.2705572       | 0.11 | 0.0003362        | 9.90   | 0.0000000        | 0.00   | 22.40269        | 0.06 | 0.0012000        | 2.47   | 79.7661         | 0.34 | 58.7164         | 0.46 | 0.0000000       | 0.00 | 0.0135984       | 9.65 |
| 21F16407              | 24.0 % | ✓               | 0.2891882 | 0.36 | 0.0000000       | 0.00 | 0.0007400        | 1.62   | 0.0000013        | 96.29  | 2.737575         | 1.61   | 0.0545120       | 0.39 | 0.0000000       | 0.00 | 0.1910536       | 0.12 | 0.0004928        | 9.76   | 0.0098507        | 96.29  | 15.81962        | 0.07 | 0.0017589        | 1.85   | 56.7100         | 0.57 | 86.3400         | 0.37 | 0.0000000       | 0.00 | 0.0096025       | 9.65 |
| 21F16408              | 24.0 % | ✓               | 0.2158404 | 0.43 | 0.0000000       | 0.00 | 0.0000584        | 20.98  | 0.0000000        | 0.00   | 0.216155         | 20.98  | 0.0406859       | 0.46 | 0.0000000       | 0.00 | 0.3360227       | 0.11 | 0.0000389        | 23.08  | 0.0000000        | 0.00   | 27.82336        | 0.06 | 0.0001389        | 21.00  | 98.5775         | 0.29 | 64.4413         | 0.45 | 0.0000000       | 0.00 | 0.0168888       | 9.65 |
| 21F16410              | 24.0 % | ✓               | 1.9886062 | 0.19 | 0.0000000       | 0.00 | 0.0001447        | 8.46   | 0.0000039        | 28.44  | 0.535455         | 8.46   | 0.3748523       | 0.25 | 0.0000000       | 0.00 | 0.2212756       | 0.11 | 0.0000964        | 12.82  | 0.0302281        | 28.46  | 18.32207        | 0.07 | 0.0003440        | 8.51   | 61.1282         | 2.14 | 593.7183        | 0.22 | 0.0000000       | 0.00 | 0.0111215       | 9.65 |
| 21F16411              | 24.0 % | ✓               | 0.1694818 | 0.45 | 0.0000000       | 0.00 | 0.0000899        | 12.90  | 0.0000007        | 177.27 | 0.332550         | 12.90  | 0.0319473       | 0.48 | 0.0000000       | 0.00 | 0.1524583       | 0.13 | 0.0000599        | 16.10  | 0.0050965        | 177.27 | 12.62385        | 0.09 | 0.0002137        | 12.93  | 43.3845         | 0.54 | 50.6005         | 0.46 | 0.0000000       | 0.00 | 0.0076627       | 9.65 |
| 21F16413              | 24.0 % | ✓               | 0.1892453 | 0.41 | 0.0000000       | 0.00 | 0.0003162        | 3.75   | 0.0000020        | 60.03  | 1.169768         | 3.75   | 0.0356727       | 0.44 | 0.0000000       | 0.00 | 0.2557471       | 0.11 | 0.0002106        | 10.33  | 0.0151700        | 60.04  | 21.17638        | 0.07 | 0.0007516        | 3.86   | 74.7994         | 0.33 | 56.5011         | 0.43 | 0.0000000       | 0.00 | 0.0128541       | 9.65 |
| 21F16414              | 24.0 % | ✓               | 0.2272955 | 0.39 | 0.0000000       | 0.00 | 0.0006032        | 2.01   | 0.0000037        | 31.65  | 2.231710         | 2.00   | 0.0428452       | 0.42 | 0.0000000       | 0.00 | 0.2118808       | 0.11 | 0.0004017        | 9.84   | 0.0284281        | 31.66  | 17.54416        | 0.07 | 0.0014339        | 2.20   | 61.3937         | 0.45 | 67.8613         | 0.41 | 0.0000000       | 0.00 | 0.0106493       | 9.65 |
| 21F16416              | 24.0 % | ✓               | 0.1592414 | 0.50 | 0.0000000       | 0.00 | 0.0001916        | 6.06   | 0.0000028        | 45.29  | 0.708846         | 6.05   | 0.0300170       | 0.52 | 0.0000000       | 0.00 | 0.0966887       | 0.16 | 0.0001276        | 11.38  | 0.0213023        | 45.30  | 8.00602         | 0.13 | 0.0004554        | 6.12   | 28.0783         | 0.86 | 47.5431         | 0.51 | 0.0000000       | 0.00 | 0.0048597       | 9.65 |
| 21F16417              | 24.0 % | ✓               | 0.2135078 | 0.37 | 0.0000000       | 0.00 | 0.0002357        | 4.91   | 0.0000034        | 36.14  | 0.871938         | 4.90   | 0.0402462       | 0.41 | 0.0000000       | 0.00 | 0.3140884       | 0.11 | 0.0001569        | 10.81  | 0.0264247        | 36.16  | 26.00715        | 0.06 | 0.0005602        | 4.99   | 91.8208         | 0.27 | 63.7449         | 0.39 | 0.0000000       | 0.00 | 0.0157863       | 9.65 |
| 21F16419              | 24.0 % | ✓               | 0.1179837 | 0.62 | 0.0000000       | 0.00 | 0.0000647        | 16.96  | 0.0000033        | 37.45  | 0.239230         | 16.96  | 0.0222399       | 0.64 | 0.0000000       | 0.00 | 0.1801562       | 0.12 | 0.0000431        | 19.50  | 0.0252326        | 37.46  | 14.91730        | 0.08 | 0.0001537        | 16.98  | 52.1083         | 0.43 | 35.2252         | 0.63 | 0.0000000       | 0.00 | 0.0090548       | 9.65 |
| 21F16420              | 24.0 % | ✓               | 0.5807164 | 0.26 | 0.0000000       | 0.00 | 0.0000583        | 18.84  | 0.0000003        | 355.40 | 0.215727         | 18.84  | 0.1094650       | 0.30 | 0.0000000       | 0.00 | 0.1267088       | 0.14 | 0.0000388        | 21.16  | 0.0026199        | 355.40 | 10.49175        | 0.10 | 0.0001386        | 18.86  | 35.4201         | 1.37 | 173.3787        | 0.28 | 0.0000000       | 0.00 | 0.0063685       | 9.65 |
| 21F16422              | 24.0 % | ✓               | 0.3820030 | 0.33 | 0.0000000       | 0.00 | 0.0000753        | 15.38  | 0.0000016        | 78.99  | 0.278559         | 15.38  | 0.0720076       | 0.37 | 0.0000000       | 0.00 | 0.3083462       | 0.11 | 0.0000501        | 18.15  | 0.0127212        | 78.99  | 25.53169        | 0.06 | 0.0001790        | 15.41  | 90.2486         | 0.44 | 114.0508        | 0.35 | 0.0000000       | 0.00 | 0.0154977       | 9.65 |
| 21F16423              | 24.0 % | ✓               | 0.1609103 | 0.46 | 0.0000000       | 0.00 | 0.0000309        | 36.15  | 0.0000000        | 0.00   | 0.114305         | 36.15  | 0.0303316       | 0.49 | 0.0000000       | 0.00 | 0.1631730       | 0.12 | 0.0000206        | 37.41  | 0.0000000        | 0.00   | 13.51105        | 0.08 | 0.0000734        | 36.17  | 47.8784         | 0.48 | 48.0414         | 0.47 | 0.0000000       | 0.00 | 0.0082012       | 9.65 |
| 21F16425              | 24.0 % | ✓               | 0.3900226 | 0.30 | 0.0000000       | 0.00 | 0.0000106        | 109.46 | 0.0000007        | 172.82 | 0.039231         | 109.46 | 0.0735193       | 0.34 | 0.0000000       | 0.00 | 0.1909527       | 0.12 | 0.0000071        | 109.88 | 0.0052211        | 172.83 | 15.81127        | 0.08 | 0.0000252        | 109.46 | 54.8206         | 0.67 | 116.4451        | 0.31 | 0.0000000       | 0.00 | 0.0095974       | 9.65 |
| 21F16426              | 24.0 % | ✓               | 0.3106946 | 0.33 | 0.0000000       | 0.00 | 0.0001221        | 9.44   | 0.0000000        | 0.00   | 0.451851         | 9.44   | 0.0585659       | 0.37 | 0.0000000       | 0.00 | 0.2949173       | 0.11 | 0.0000813        | 13.49  | 0.0000000        | 0.00   | 24.41975        | 0.06 | 0.0002903        | 9.49   | 84.1841         | 0.38 | 92.7610         | 0.35 | 0.0000000       | 0.00 | 0.0148228       | 9.65 |
| 21F16428              | 24.0 % | ✓               | 0.0871472 | 0.70 | 0.0000000       | 0.00 | 0.0002304        | 5.41   | 0.0000000        | 0.00   | 0.852428         | 5.40   | 0.0164272       | 0.72 | 0.0000000       | 0.00 | 0.1911286       | 0.12 | 0.0001534        | 11.04  | 0.0000000        | 0.00   | 15.82584        | 0.07 | 0.0005477        | 5.48   | 55.3846         | 0.34 | 26.0187         | 0.71 | 0.0000000       | 0.00 | 0.0096063       | 9.65 |
| 21F16429              | 24.0 % | ✓               | 0.0596245 | 0.95 | 0.0000000       | 0.00 | 0.0000130        | 94.20  | 0.0000000        | 0.00   | 0.048068         | 94.20  | 0.0112392       | 0.96 | 0.0000000       | 0.00 | 0.2286564       | 0.11 | 0.0000087        | 94.69  | 0.0000000        | 0.00   | 18.93322        | 0.07 | 0.0000309        | 94.21  | 66.9868         | 0.26 | 17.8015         | 0.96 | 0.0000000       | 0.00 | 0.0114925       | 9.65 |
| 21F16431              | 24.0 % | ✓               | 0.0689101 | 0.82 | 0.0000000       | 0.00 | 0.0000260        | 45.08  | 0.0000013        | 98.34  | 0.096257         | 45.08  | 0.0129896       | 0.83 | 0.0000000       | 0.00 | 0.1263562       | 0.13 | 0.0000173        | 46.09  | 0.0098237        | 98.35  | 10.46255        | 0.10 | 0.0000618        | 45.09  | 36.8122         | 0.47 | 20.5738         | 0.83 | 0.0000000       | 0.00 | 0.0063508       | 9.65 |
| 21F16432              | 24.0 % | ✓               | 0.1543247 | 0.47 | 0.0000000       | 0.00 | 0.0000015        | 811.10 | 0.0000000        | 0.00   | 0.005546         | 811.10 | 0.0290902       | 0.49 | 0.0000000       | 0.00 | 0.3139743       | 0.11 | 0.0000010        | 811.15 | 0.0000000        | 0.00   | 25.99770        | 0.06 | 0.0000036        | 811.10 | 92.0760         | 0.24 | 46.0752         | 0.48 | 0.0000000       | 0.00 | 0.0157806       | 9.65 |
| 21F16434              | 24.0 % | ✓               | 0.4155584 | 0.31 | 0.0000000       | 0.00 | 0.0000959        | 11.14  | 0.0000023        | 50.05  | 0.354668         | 11.14  | 0.0783328       | 0.34 | 0.0000000       | 0.00 | 0.2297834       | 0.11 | 0.0000638        | 14.73  | 0.0179259        | 50.06  | 19.02653        | 0.07 | 0.0002279        | 11.18  | 64.9842         | 0.62 | 124.0691        | 0.32 | 0.0000000       | 0.00 | 0.0115491       | 9.65 |
| 21F16435              | 24.0 % | ✓               | 0.1330359 | 0.48 | 0.0000000       | 0.00 | 0.0000221        | 51.52  | 0.0000000        | 0.00   | 0.081798         | 51.52  | 0.0250773       | 0.51 | 0.0000000       | 0.00 | 0.2524981       | 0.11 | 0.0000147        | 52.41  | 0.0000000        | 0.00   | 20.90735        | 0.07 | 0.0000526        | 51.53  | 73.6156         | 0.27 | 39.7192         | 0.49 | 0.0000000       | 0.00 | 0.0126908       | 9.65 |
| 21F16437              | 24.0 % | ✓               | 0.1629184 | 0.48 | 0.0000000       | 0.00 | 0.0000437        | 28.02  | 0.0000013        | 96.38  | 0.161657         | 28.02  | 0.0307101       | 0.51 | 0.0000000       | 0.00 | 0.1105796       | 0.14 | 0.0000291        | 29.63  | 0.0100588        | 96.39  | 9.15622         | 0.10 | 0.0001039        | 28.03  | 32.0991         | 0.75 | 48.6409         | 0.50 | 0.0000000       | 0.00 | 0.0055578       | 9.65 |
| 21F16438              | 24.0 % | ✓               | 0.2728731 | 0.35 | 0.0000000       | 0.00 | 0.0000312        | 36.13  | 0.0000000        | 0.00   | 0.115542         | 36.13  | 0.0             |      |                 |      |                 |      |                  |        |                  |        |                 |      |                  |        |                 |      |                 |      |                 |      |                 |      |

| Additional Parameters |        |   | 40Ar/39Ar | 1σ       | 37Ar/39Ar | 1σ       | 36Ar/39Ar | 1σ       | Time (days) | 37Ar (decay) | 39Ar (decay) | 40Ar (moles) |
|-----------------------|--------|---|-----------|----------|-----------|----------|-----------|----------|-------------|--------------|--------------|--------------|
| 21F16395              | 24.0 % | ✓ | 8.527712  | 0.006382 | 0.041678  | 0.002548 | 0.016625  | 0.000064 | 79.368      | 4.807349     | 1.00056106   | 5.036E-12    |
| 21F16396              | 24.0 % | ✓ | 13.318265 | 0.009963 | 0.014757  | 0.002421 | 0.033002  | 0.000089 | 79.375      | 4.808009     | 1.00056111   | 8.253E-12    |
| 21F16398              | 24.0 % | ✓ | 6.834408  | 0.003876 | 0.129443  | 0.001456 | 0.011019  | 0.000039 | 79.389      | 4.809328     | 1.00056121   | 7.463E-12    |
| 21F16399              | 24.0 % | ✓ | 7.109622  | 0.003444 | 0.173056  | 0.001093 | 0.011650  | 0.000034 | 79.396      | 4.809987     | 1.00056126   | 1.092E-11    |
| 21F16401              | 24.0 % | ✓ | 6.319093  | 0.004119 | 0.184367  | 0.002002 | 0.009098  | 0.000038 | 79.410      | 4.811373     | 1.00056136   | 5.048E-12    |
| 21F16402              | 24.0 % | ✓ | 7.017845  | 0.006152 | 0.014202  | 0.003132 | 0.011718  | 0.000056 | 79.417      | 4.812033     | 1.00056141   | 3.465E-12    |
| 21F16404              | 24.0 % | ✓ | 16.806930 | 0.017128 | 0.009259  | 0.003827 | 0.044316  | 0.000130 | 79.431      | 4.813353     | 1.00056151   | 6.609E-12    |
| 21F16405              | 24.0 % | ✓ | 6.181787  | 0.003988 | 0.083365  | 0.001915 | 0.008801  | 0.000040 | 79.438      | 4.814014     | 1.00056156   | 4.903E-12    |
| 21F16407              | 24.0 % | ✓ | 9.042174  | 0.006884 | 0.173030  | 0.002790 | 0.018325  | 0.000067 | 79.451      | 4.815269     | 1.00056165   | 5.064E-12    |
| 21F16408              | 24.0 % | ✓ | 5.859641  | 0.003458 | 0.007769  | 0.001630 | 0.007760  | 0.000034 | 79.457      | 4.815797     | 1.00056169   | 5.771E-12    |
| 21F16410              | 24.0 % | ✓ | 35.740794 | 0.024957 | 0.029224  | 0.002473 | 0.108542  | 0.000223 | 79.469      | 4.816986     | 1.00056178   | 2.318E-11    |
| 21F16411              | 24.0 % | ✓ | 7.445516  | 0.006832 | 0.026343  | 0.003398 | 0.013432  | 0.000061 | 79.475      | 4.817515     | 1.00056182   | 3.327E-12    |
| 21F16413              | 24.0 % | ✓ | 6.200717  | 0.004370 | 0.055237  | 0.002071 | 0.008951  | 0.000038 | 79.487      | 4.818638     | 1.00056190   | 4.648E-12    |
| 21F16414              | 24.0 % | ✓ | 7.367417  | 0.005420 | 0.127195  | 0.002545 | 0.012989  | 0.000052 | 79.493      | 4.819233     | 1.00056194   | 4.576E-12    |
| 21F16416              | 24.0 % | ✓ | 9.445635  | 0.012357 | 0.088534  | 0.005361 | 0.019913  | 0.000102 | 79.505      | 4.820357     | 1.00056203   | 2.677E-12    |
| 21F16417              | 24.0 % | ✓ | 5.982128  | 0.003517 | 0.033526  | 0.001644 | 0.008219  | 0.000031 | 79.511      | 4.820952     | 1.00056207   | 5.508E-12    |
| 21F16419              | 24.0 % | ✓ | 5.855062  | 0.004768 | 0.016037  | 0.002720 | 0.007914  | 0.000049 | 79.523      | 4.822076     | 1.00056215   | 3.092E-12    |
| 21F16420              | 24.0 % | ✓ | 19.901587 | 0.020827 | 0.020561  | 0.003874 | 0.055355  | 0.000155 | 79.529      | 4.822672     | 1.00056220   | 7.392E-12    |
| 21F16422              | 24.0 % | ✓ | 8.002352  | 0.004952 | 0.010910  | 0.001678 | 0.014965  | 0.000051 | 79.541      | 4.823796     | 1.00056228   | 7.233E-12    |
| 21F16423              | 24.0 % | ✓ | 7.099924  | 0.006251 | 0.008460  | 0.003059 | 0.011912  | 0.000056 | 79.547      | 4.824326     | 1.00056232   | 3.396E-12    |
| 21F16425              | 24.0 % | ✓ | 10.832469 | 0.008988 | 0.002481  | 0.002716 | 0.024668  | 0.000075 | 79.559      | 4.825517     | 1.00056241   | 6.063E-12    |
| 21F16426              | 24.0 % | ✓ | 7.246505  | 0.004568 | 0.018503  | 0.001747 | 0.012728  | 0.000043 | 79.565      | 4.826047     | 1.00056245   | 6.264E-12    |
| 21F16428              | 24.0 % | ✓ | 5.144124  | 0.004086 | 0.053861  | 0.002910 | 0.005521  | 0.000039 | 79.576      | 4.827172     | 1.00056253   | 2.882E-12    |
| 21F16429              | 24.0 % | ✓ | 4.478879  | 0.003321 | 0.002539  | 0.002392 | 0.003150  | 0.000030 | 79.583      | 4.827768     | 1.00056258   | 3.002E-12    |
| 21F16431              | 24.0 % | ✓ | 5.485473  | 0.005777 | 0.009200  | 0.004147 | 0.006589  | 0.000054 | 79.594      | 4.828894     | 1.00056266   | 2.032E-12    |
| 21F16432              | 24.0 % | ✓ | 5.314583  | 0.003139 | 0.000213  | 0.001730 | 0.005936  | 0.000028 | 79.601      | 4.829490     | 1.00056270   | 4.891E-12    |
| 21F16434              | 24.0 % | ✓ | 9.936786  | 0.006878 | 0.018640  | 0.002077 | 0.021846  | 0.000068 | 79.613      | 4.830616     | 1.00056279   | 6.693E-12    |
| 21F16435              | 24.0 % | ✓ | 5.421404  | 0.003824 | 0.003912  | 0.002016 | 0.006364  | 0.000031 | 79.619      | 4.831213     | 1.00056283   | 4.013E-12    |
| 21F16437              | 24.0 % | ✓ | 8.818563  | 0.009676 | 0.017655  | 0.004947 | 0.017798  | 0.000088 | 79.631      | 4.832339     | 1.00056291   | 2.858E-12    |
| 21F16438              | 24.0 % | ✓ | 6.871089  | 0.004278 | 0.004782  | 0.001728 | 0.011296  | 0.000040 | 79.636      | 4.832870     | 1.00056295   | 5.877E-12    |

| Procedure<br>Blanks |        | 36Ar ± 1σ (SE)<br>[fA] | 37Ar ± 1σ (SE)<br>[fA] | 38Ar ± 1σ (SE)<br>[fA] | 39Ar ± 1σ (SE)<br>[fA] | 40Ar ± 1σ (SE)<br>[fA] |
|---------------------|--------|------------------------|------------------------|------------------------|------------------------|------------------------|
| 21F16395            | 24.0 % | 0.0524306 ±0.0003470   | 0.0109008 ±0.0060712   | 0.0112282 ±0.0068608   | 0.0112798 ±0.0063151   | 14.8355912 ±0.0144156  |
| 21F16396            | 24.0 % | 0.0524306 ±0.0003470   | 0.0109008 ±0.0060712   | 0.0112282 ±0.0068608   | 0.0112798 ±0.0063151   | 14.8355912 ±0.0144156  |
| 21F16398            | 24.0 % | 0.0533536 ±0.0003379   | 0.0045847 ±0.0063848   | 0.0097879 ±0.0062650   | 0.0197317 ±0.0063279   | 15.0154229 ±0.0177376  |
| 21F16399            | 24.0 % | 0.0533536 ±0.0003379   | 0.0045847 ±0.0063848   | 0.0097879 ±0.0062650   | 0.0197317 ±0.0063279   | 15.0154229 ±0.0177376  |
| 21F16401            | 24.0 % | 0.0273093 ±0.0002718   | 0.0108630 ±0.0063708   | 0.0008736 ±0.0067681   | 0.0060936 ±0.0065253   | 7.2673527 ±0.0163979   |
| 21F16402            | 24.0 % | 0.0273093 ±0.0002718   | 0.0108630 ±0.0063708   | 0.0008736 ±0.0067681   | 0.0060936 ±0.0065253   | 7.2673527 ±0.0163979   |
| 21F16404            | 24.0 % | 0.0282935 ±0.0002661   | 0.0075649 ±0.0066543   | 0.0195850 ±0.0070850   | 0.0204999 ±0.0061313   | 7.5674460 ±0.0147262   |
| 21F16405            | 24.0 % | 0.0282935 ±0.0002661   | 0.0075649 ±0.0066543   | 0.0195850 ±0.0070850   | 0.0204999 ±0.0061313   | 7.5674460 ±0.0147262   |
| 21F16407            | 24.0 % | 0.0279169 ±0.0002546   | 0.0118424 ±0.0064183   | 0.0104093 ±0.0066915   | 0.0131708 ±0.0062887   | 7.3052134 ±0.0164829   |
| 21F16408            | 24.0 % | 0.0279169 ±0.0002546   | 0.0118424 ±0.0064183   | 0.0104093 ±0.0066915   | 0.0131708 ±0.0062887   | 7.3052134 ±0.0164829   |
| 21F16410            | 24.0 % | 0.0293456 ±0.0002773   | 0.0065291 ±0.0063152   | 0.0012771 ±0.0058109   | 0.0080341 ±0.0058990   | 8.0292772 ±0.0154157   |
| 21F16411            | 24.0 % | 0.0293456 ±0.0002773   | 0.0065291 ±0.0063152   | 0.0012771 ±0.0058109   | 0.0080341 ±0.0058990   | 8.0292772 ±0.0154157   |
| 21F16413            | 24.0 % | 0.0275715 ±0.0002685   | 0.0033541 ±0.0066149   | 0.0087306 ±0.0061169   | 0.0050214 ±0.0067733   | 7.5563009 ±0.0158982   |
| 21F16414            | 24.0 % | 0.0275715 ±0.0002685   | 0.0033541 ±0.0066149   | 0.0087306 ±0.0061169   | 0.0050214 ±0.0067733   | 7.5563009 ±0.0158982   |
| 21F16416            | 24.0 % | 0.0259386 ±0.0002665   | 0.0082097 ±0.0067850   | 0.0010863 ±0.0066970   | 0.0076948 ±0.0063181   | 7.0846431 ±0.0149966   |
| 21F16417            | 24.0 % | 0.0259386 ±0.0002665   | 0.0082097 ±0.0067850   | 0.0010863 ±0.0066970   | 0.0076948 ±0.0063181   | 7.0846431 ±0.0149966   |
| 21F16419            | 24.0 % | 0.0260053 ±0.0003200   | 0.0108187 ±0.0060438   | 0.0116765 ±0.0067167   | 0.0087442 ±0.0067463   | 7.0434396 ±0.0151111   |
| 21F16420            | 24.0 % | 0.0260053 ±0.0003200   | 0.0108187 ±0.0060438   | 0.0116765 ±0.0067167   | 0.0087442 ±0.0067463   | 7.0434396 ±0.0151111   |
| 21F16422            | 24.0 % | 0.0262419 ±0.0003030   | 0.0099977 ±0.0067916   | 0.0106295 ±0.0074390   | 0.0129102 ±0.0064142   | 6.9805238 ±0.0144096   |
| 21F16423            | 24.0 % | 0.0262419 ±0.0003030   | 0.0099977 ±0.0067916   | 0.0106295 ±0.0074390   | 0.0129102 ±0.0064142   | 6.9805238 ±0.0144096   |
| 21F16425            | 24.0 % | 0.0261516 ±0.0002709   | 0.0151676 ±0.0061612   | 0.0235526 ±0.0061361   | 0.0199608 ±0.0069849   | 7.1464852 ±0.0165387   |
| 21F16426            | 24.0 % | 0.0261516 ±0.0002709   | 0.0151676 ±0.0061612   | 0.0235526 ±0.0061361   | 0.0199608 ±0.0069849   | 7.1464852 ±0.0165387   |
| 21F16428            | 24.0 % | 0.0307826 ±0.0002803   | 0.0139419 ±0.0060847   | 0.0294078 ±0.0071753   | 0.0175133 ±0.0060360   | 8.4618252 ±0.0161461   |
| 21F16429            | 24.0 % | 0.0307826 ±0.0002803   | 0.0139419 ±0.0060847   | 0.0294078 ±0.0071753   | 0.0175133 ±0.0060360   | 8.4618252 ±0.0161461   |
| 21F16431            | 24.0 % | 0.0262419 ±0.0003030   | 0.0099977 ±0.0067916   | 0.0106295 ±0.0074390   | 0.0129102 ±0.0064142   | 6.9805238 ±0.0144096   |
| 21F16432            | 24.0 % | 0.0262419 ±0.0003030   | 0.0099977 ±0.0067916   | 0.0106295 ±0.0074390   | 0.0129102 ±0.0064142   | 6.9805238 ±0.0144096   |
| 21F16434            | 24.0 % | 0.0261516 ±0.0002709   | 0.0151676 ±0.0061612   | 0.0235526 ±0.0061361   | 0.0199608 ±0.0069849   | 7.1464852 ±0.0165387   |
| 21F16435            | 24.0 % | 0.0261516 ±0.0002709   | 0.0151676 ±0.0061612   | 0.0235526 ±0.0061361   | 0.0199608 ±0.0069849   | 7.1464852 ±0.0165387   |
| 21F16437            | 24.0 % | 0.0307826 ±0.0002803   | 0.0139419 ±0.0060847   | 0.0294078 ±0.0071753   | 0.0175133 ±0.0060360   | 8.4618252 ±0.0161461   |
| 21F16438            | 24.0 % | 0.0307826 ±0.0002803   | 0.0139419 ±0.0060847   | 0.0294078 ±0.0071753   | 0.0175133 ±0.0060360   | 8.4618252 ±0.0161461   |

| Intercept Values |        | 36Ar ± 1σ (SE)<br>[fA] | r2     | Regression<br>(type,n) | 37Ar ± 1σ (SE)<br>[fA] | r2     | Regression<br>(type,n) | 38Ar ± 1σ (SE)<br>[fA] | r2     | Regression<br>(type,n) | 39Ar ± 1σ (SE)<br>[fA] | r2     | Regression<br>(type,n) | 40Ar ± 1σ (SE)<br>[fA] | r2     | Regression<br>(type,n) |
|------------------|--------|------------------------|--------|------------------------|------------------------|--------|------------------------|------------------------|--------|------------------------|------------------------|--------|------------------------|------------------------|--------|------------------------|
| 21F16395         | 24.0 % | 0.3135729 ±0.0008307   | 0.9168 | EXP 149 of 150         | 0.1548507 ±0.0063609   | 0.0126 | EXP 150 of 150         | 0.2793007 ±0.0068603   | 0.1906 | EXP 150 of 150         | 16.658696 ±0.007931    | 0.9981 | EXP 150 of 150         | 157.10438 ±0.02157     | 0.9997 | EXP 150 of 150         |
| 21F16396         | 24.0 % | 0.5963699 ±0.0010628   | 0.9698 | EXP 150 of 150         | 0.0643739 ±0.0063327   | 0.0049 | EXP 150 of 150         | 0.3375347 ±0.0062160   | 0.2655 | EXP 150 of 150         | 17.479396 ±0.008824    | 0.9979 | EXP 150 of 150         | 247.97947 ±0.02758     | 0.9999 | EXP 150 of 150         |
| 21F16398         | 24.0 % | 0.3734083 ±0.0009364   | 0.9331 | EXP 150 of 150         | 0.8309182 ±0.0064019   | 0.5783 | EXP 150 of 150         | 0.4688839 ±0.0069837   | 0.3997 | EXP 150 of 150         | 30.801717 ±0.009763    | 0.9992 | EXP 149 of 150         | 225.84323 ±0.02650     | 0.9998 | EXP 149 of 150         |
| 21F16399         | 24.0 % | 0.5292374 ±0.0010831   | 0.9608 | EXP 150 of 150         | 1.5580863 ±0.0062789   | 0.8606 | EXP 148 of 150         | 0.6488218 ±0.0056429   | 0.5495 | EXP 147 of 150         | 43.311263 ±0.009189    | 0.9996 | EXP 149 of 150         | 323.46190 ±0.02938     | 0.9999 | EXP 150 of 150         |
| 21F16401         | 24.0 % | 0.2206274 ±0.0006870   | 0.8592 | EXP 149 of 150         | 0.8715263 ±0.0064544   | 0.5961 | EXP 150 of 150         | 0.3342295 ±0.0065087   | 0.2544 | EXP 149 of 150         | 22.525304 ±0.008752    | 0.9988 | EXP 149 of 150         | 149.87353 ±0.02058     | 0.9997 | EXP 150 of 150         |
| 21F16402         | 24.0 % | 0.1811860 ±0.0006208   | 0.8026 | EXP 150 of 150         | 0.0518302 ±0.0064033   | 0.0003 | EXP 150 of 150         | 0.2202857 ±0.0069407   | 0.1511 | EXP 150 of 150         | 13.923411 ±0.007845    | 0.9974 | EXP 150 of 150         | 105.14640 ±0.02122     | 0.9993 | EXP 150 of 150         |
| 21F16404         | 24.0 % | 0.4917638 ±0.0010153   | 0.9581 | EXP 150 of 150         | 0.0288306 ±0.0057416   | 0.0026 | EXP 150 of 150         | 0.2377386 ±0.0068138   | 0.0961 | EXP 149 of 150         | 11.104432 ±0.008256    | 0.9953 | EXP 150 of 150         | 194.25386 ±0.02333     | 0.9998 | EXP 150 of 150         |
| 21F16405         | 24.0 % | 0.2139375 ±0.0007282   | 0.8466 | EXP 150 of 150         | 0.3936986 ±0.0057763   | 0.2564 | EXP 150 of 150         | 0.3228278 ±0.0067828   | 0.1901 | EXP 148 of 150         | 22.376436 ±0.008500    | 0.9988 | EXP 150 of 150         | 146.06351 ±0.02369     | 0.9996 | EXP 150 of 150         |
| 21F16407         | 24.0 % | 0.3008978 ±0.0008365   | 0.9068 | EXP 150 of 150         | 0.5776663 ±0.0063090   | 0.3714 | EXP 149 of 150         | 0.2655083 ±0.0066499   | 0.1872 | EXP 150 of 150         | 15.800689 ±0.007463    | 0.9982 | EXP 148 of 150         | 150.36489 ±0.02404     | 0.9996 | EXP 150 of 150         |
| 21F16408         | 24.0 % | 0.2311949 ±0.0007786   | 0.8368 | EXP 150 of 150         | 0.0565142 ±0.0068277   | 0.0001 | EXP 150 of 150         | 0.3839224 ±0.0071279   | 0.2557 | EXP 149 of 150         | 27.777116 ±0.009085    | 0.9991 | EXP 150 of 150         | 170.34092 ±0.02516     | 0.9997 | EXP 150 of 150         |
| 21F16410         | 24.0 % | 1.9018429 ±0.0020609   | 0.9907 | EXP 150 of 150         | 0.1171617 ±0.0069064   | 0.0217 | EXP 150 of 150         | 0.6231924 ±0.0061366   | 0.5053 | EXP 149 of 150         | 18.291228 ±0.008654    | 0.9981 | EXP 150 of 150         | 662.88686 ±0.03555     | 1.0000 | EXP 150 of 150         |
| 21F16411         | 24.0 % | 0.1890052 ±0.0006106   | 0.8339 | EXP 150 of 150         | 0.0752312 ±0.0062162   | 0.0038 | EXP 150 of 150         | 0.1876849 ±0.0068634   | 0.0427 | EXP 148 of 150         | 12.605080 ±0.007849    | 0.9967 | EXP 150 of 150         | 102.02198 ±0.02136     | 0.9991 | EXP 150 of 150         |
| 21F16413         | 24.0 % | 0.2060536 ±0.0006276   | 0.8644 | EXP 147 of 150         | 0.2382537 ±0.0061554   | 0.1501 | EXP 150 of 150         | 0.3145598 ±0.0066634   | 0.1981 | EXP 147 of 150         | 21.136817 ±0.008984    | 0.9985 | EXP 150 of 150         | 138.86967 ±0.02711     | 0.9994 | EXP 150 of 150         |
| 21F16414         | 24.0 % | 0.2421513 ±0.0007205   | 0.8779 | EXP 149 of 150         | 0.4575340 ±0.0063107   | 0.2855 | EXP 150 of 150         | 0.2913888 ±0.0065187   | 0.2833 | EXP 148 of 150         | 17.513056 ±0.007590    | 0.9985 | EXP 149 of 150         | 136.82201 ±0.02335     | 0.9995 | EXP 150 of 150         |
| 21F16416         | 24.0 % | 0.1760542 ±0.0006511   | 0.7821 | EXP 150 of 150         | 0.1545650 ±0.0056867   | 0.0301 | EXP 150 of 150         | 0.1465804 ±0.0068882   | 0.0277 | EXP 150 of 150         | 7.997033 ±0.007268     | 0.9930 | EXP 150 of 150         | 82.71091 ±0.01904      | 0.9987 | EXP 149 of 150         |
| 21F16417         | 24.0 % | 0.2271905 ±0.0006232   | 0.8970 | EXP 149 of 150         | 0.1882163 ±0.0056271   | 0.0793 | EXP 149 of 150         | 0.3786243 ±0.0067002   | 0.3305 | EXP 150 of 150         | 25.959733 ±0.008119    | 0.9992 | EXP 150 of 150         | 162.66613 ±0.02378     | 0.9997 | EXP 150 of 150         |
| 21F16419         | 24.0 % | 0.1371559 ±0.0005836   | 0.6543 | EXP 150 of 150         | 0.0601949 ±0.0057939   | 0.0001 | EXP 149 of 150         | 0.2386276 ±0.0065748   | 0.1666 | EXP 148 of 150         | 14.894260 ±0.006982    | 0.9982 | EXP 149 of 150         | 94.38604 ±0.01988      | 0.9992 | EXP 148 of 150         |
| 21F16420         | 24.0 % | 0.5728297 ±0.0010793   | 0.9685 | EXP 150 of 150         | 0.0553385 ±0.0058157   | 0.0350 | EXP 150 of 150         | 0.2497531 ±0.0063797   | 0.2133 | EXP 149 of 150         | 10.478166 ±0.007430    | 0.9958 | EXP 150 of 150         | 215.84858 ±0.02570     | 0.9998 | EXP 150 of 150         |
| 21F16422         | 24.0 % | 0.3859864 ±0.0010070   | 0.9289 | EXP 150 of 150         | 0.0674708 ±0.0056566   | 0.0039 | EXP 150 of 150         | 0.4025102 ±0.0066388   | 0.1708 | EXP 150 of 150         | 25.490112 ±0.009768    | 0.9988 | EXP 150 of 150         | 211.29549 ±0.02202     | 0.9999 | EXP 148 of 150         |
| 21F16423         | 24.0 % | 0.1777749 ±0.0005818   | 0.8129 | EXP 150 of 150         | 0.0335787 ±0.0051531   | 0.0430 | EXP 148 of 150         | 0.1863186 ±0.0075356   | 0.0896 | EXP 149 of 150         | 13.495108 ±0.007730    | 0.9974 | EXP 150 of 150         | 102.90849 ±0.01956     | 0.9994 | EXP 150 of 150         |
| 21F16425         | 24.0 % | 0.3933851 ±0.0008721   | 0.9535 | EXP 147 of 150         | 0.0232590 ±0.0063624   | 0.0077 | EXP 150 of 150         | 0.2923990 ±0.0065443   | 0.1736 | EXP 147 of 150         | 15.797402 ±0.008714    | 0.9975 | EXP 150 of 150         | 178.42184 ±0.02549     | 0.9997 | EXP 150 of 150         |
| 21F16426         | 24.0 % | 0.3187989 ±0.0007980   | 0.9297 | EXP 150 of 150         | 0.1083513 ±0.0062762   | 0.0819 | EXP 150 of 150         | 0.3515920 ±0.0071666   | 0.2364 | EXP 150 of 150         | 24.387714 ±0.008794    | 0.9990 | EXP 150 of 150         | 184.10643 ±0.02525     | 0.9998 | EXP 150 of 150         |
| 21F16428         | 24.0 % | 0.1130523 ±0.0004880   | 0.5298 | EXP 149 of 150         | 0.1896941 ±0.0072750   | 0.0282 | EXP 150 of 150         | 0.2344764 ±0.0070788   | 0.0778 | EXP 150 of 150         | 15.810010 ±0.007519    | 0.9982 | EXP 150 of 150         | 89.87471 ±0.02044      | 0.9990 | EXP 149 of 150         |
| 21F16429         | 24.0 % | 0.0869337 ±0.0004453   | 0.1489 | EXP 150 of 150         | 0.0238513 ±0.0070792   | 0.0012 | EXP 150 of 150         | 0.2330229 ±0.0071120   | 0.0874 | EXP 150 of 150         | 18.910218 ±0.008471    | 0.9984 | EXP 146 of 150         | 93.26155 ±0.01978      | 0.9992 | EXP 150 of 150         |
| 21F16431         | 24.0 % | 0.0911494 ±0.0004240   | 0.3041 | EXP 150 of 150         | 0.0298367 ±0.0058177   | 0.0156 | EXP 149 of 150         | 0.1593440 ±0.0061027   | 0.0802 | EXP 150 of 150         | 10.453115 ±0.006696    | 0.9967 | EXP 150 of 150         | 64.37289 ±0.01827      | 0.9977 | EXP 149 of 150         |
| 21F16432         | 24.0 % | 0.1715466 ±0.0005645   | 0.7879 | EXP 150 of 150         | 0.0111407 ±0.0063099   | 0.0002 | EXP 149 of 150         | 0.3200793 ±0.0065626   | 0.1019 | EXP 150 of 150         | 25.954946 ±0.007973    | 0.9993 | EXP 148 of 150         | 145.14749 ±0.02246     | 0.9997 | EXP 150 of 150         |
| 21F16434         | 24.0 % | 0.4175100 ±0.0009834   | 0.9468 | EXP 150 of 150         | 0.0882403 ±0.0053188   | 0.0452 | EXP 148 of 150         | 0.3486264 ±0.0064578   | 0.3517 | EXP 150 of 150         | 19.005975 ±0.007650    | 0.9987 | EXP 149 of 150         | 196.21132 ±0.02528     | 0.9998 | EXP 150 of 150         |
| 21F16435         | 24.0 % | 0.1514314 ±0.0004979   | 0.7861 | EXP 148 of 150         | 0.0320186 ±0.0061168   | 0.0173 | EXP 150 of 150         | 0.2425032 ±0.0070909   | 0.0134 | EXP 150 of 150         | 20.882592 ±0.008655    | 0.9987 | EXP 148 of 150         | 120.49397 ±0.02155     | 0.9995 | EXP 150 of 150         |
| 21F16437         | 24.0 % | 0.1842195 ±0.0006432   | 0.8243 | EXP 150 of 150         | 0.0472365 ±0.0070700   | 0.0275 | EXP 150 of 150         | 0.1803063 ±0.0064617   | 0.2035 | EXP 149 of 150         | 9.154223 ±0.006518     | 0.9959 | EXP 150 of 150         | 89.20740 ±0.02019      | 0.9990 | EXP 150 of 150         |
| 21F16438         | 24.0 % | 0.2877336 ±0.0007480   | 0.9230 | EXP 148 of 150         | 0.0377361 ±0.0060721   | 0.0153 | EXP 150 of 150         | 0.2936686 ±0.0060362   | 0.0070 | EXP 149 of 150         | 24.125926 ±0.009151    | 0.9989 | EXP 150 of 150         | 174.46840 ±0.02068     | 0.9998 | EXP 148 of 150         |

| Project Info |        | Analyst     | Irradiation | X-pos | Y-pos | Z/H-pos | Project                | Experiment | Nmb |
|--------------|--------|-------------|-------------|-------|-------|---------|------------------------|------------|-----|
| 21F16395     | 24.0 % | Dan Miggins | 21-OSU-04   | 0.00  | 0.00  | 8.89    | Oregon\Swenton (20-01) | 21F16391   | 01  |
| 21F16396     | 24.0 % | Dan Miggins | 21-OSU-04   | 0.00  | 0.00  | 8.89    | Oregon\Swenton (20-01) | 21F16391   | 01  |
| 21F16398     | 24.0 % | Dan Miggins | 21-OSU-04   | 0.00  | 0.00  | 8.89    | Oregon\Swenton (20-01) | 21F16391   | 01  |
| 21F16399     | 24.0 % | Dan Miggins | 21-OSU-04   | 0.00  | 0.00  | 8.89    | Oregon\Swenton (20-01) | 21F16391   | 01  |
| 21F16401     | 24.0 % | Dan Miggins | 21-OSU-04   | 0.00  | 0.00  | 8.89    | Oregon\Swenton (20-01) | 21F16391   | 01  |
| 21F16402     | 24.0 % | Dan Miggins | 21-OSU-04   | 0.00  | 0.00  | 8.89    | Oregon\Swenton (20-01) | 21F16391   | 01  |
| 21F16404     | 24.0 % | Dan Miggins | 21-OSU-04   | 0.00  | 0.00  | 8.89    | Oregon\Swenton (20-01) | 21F16391   | 01  |
| 21F16405     | 24.0 % | Dan Miggins | 21-OSU-04   | 0.00  | 0.00  | 8.89    | Oregon\Swenton (20-01) | 21F16391   | 01  |
| 21F16407     | 24.0 % | Dan Miggins | 21-OSU-04   | 0.00  | 0.00  | 8.89    | Oregon\Swenton (20-01) | 21F16391   | 01  |
| 21F16408     | 24.0 % | Dan Miggins | 21-OSU-04   | 0.00  | 0.00  | 8.89    | Oregon\Swenton (20-01) | 21F16391   | 01  |
| 21F16410     | 24.0 % | Dan Miggins | 21-OSU-04   | 0.00  | 0.00  | 8.89    | Oregon\Swenton (20-01) | 21F16391   | 01  |
| 21F16411     | 24.0 % | Dan Miggins | 21-OSU-04   | 0.00  | 0.00  | 8.89    | Oregon\Swenton (20-01) | 21F16391   | 01  |
| 21F16413     | 24.0 % | Dan Miggins | 21-OSU-04   | 0.00  | 0.00  | 8.89    | Oregon\Swenton (20-01) | 21F16391   | 01  |
| 21F16414     | 24.0 % | Dan Miggins | 21-OSU-04   | 0.00  | 0.00  | 8.89    | Oregon\Swenton (20-01) | 21F16391   | 01  |
| 21F16416     | 24.0 % | Dan Miggins | 21-OSU-04   | 0.00  | 0.00  | 8.89    | Oregon\Swenton (20-01) | 21F16391   | 01  |
| 21F16417     | 24.0 % | Dan Miggins | 21-OSU-04   | 0.00  | 0.00  | 8.89    | Oregon\Swenton (20-01) | 21F16391   | 01  |
| 21F16419     | 24.0 % | Dan Miggins | 21-OSU-04   | 0.00  | 0.00  | 8.89    | Oregon\Swenton (20-01) | 21F16391   | 01  |
| 21F16420     | 24.0 % | Dan Miggins | 21-OSU-04   | 0.00  | 0.00  | 8.89    | Oregon\Swenton (20-01) | 21F16391   | 01  |
| 21F16422     | 24.0 % | Dan Miggins | 21-OSU-04   | 0.00  | 0.00  | 8.89    | Oregon\Swenton (20-01) | 21F16391   | 01  |
| 21F16423     | 24.0 % | Dan Miggins | 21-OSU-04   | 0.00  | 0.00  | 8.89    | Oregon\Swenton (20-01) | 21F16391   | 01  |
| 21F16425     | 24.0 % | Dan Miggins | 21-OSU-04   | 0.00  | 0.00  | 8.89    | Oregon\Swenton (20-01) | 21F16391   | 01  |
| 21F16426     | 24.0 % | Dan Miggins | 21-OSU-04   | 0.00  | 0.00  | 8.89    | Oregon\Swenton (20-01) | 21F16391   | 01  |
| 21F16428     | 24.0 % | Dan Miggins | 21-OSU-04   | 0.00  | 0.00  | 8.89    | Oregon\Swenton (20-01) | 21F16391   | 01  |
| 21F16429     | 24.0 % | Dan Miggins | 21-OSU-04   | 0.00  | 0.00  | 8.89    | Oregon\Swenton (20-01) | 21F16391   | 01  |
| 21F16431     | 24.0 % | Dan Miggins | 21-OSU-04   | 0.00  | 0.00  | 8.89    | Oregon\Swenton (20-01) | 21F16391   | 01  |
| 21F16432     | 24.0 % | Dan Miggins | 21-OSU-04   | 0.00  | 0.00  | 8.89    | Oregon\Swenton (20-01) | 21F16391   | 01  |
| 21F16434     | 24.0 % | Dan Miggins | 21-OSU-04   | 0.00  | 0.00  | 8.89    | Oregon\Swenton (20-01) | 21F16391   | 01  |
| 21F16435     | 24.0 % | Dan Miggins | 21-OSU-04   | 0.00  | 0.00  | 8.89    | Oregon\Swenton (20-01) | 21F16391   | 01  |
| 21F16437     | 24.0 % | Dan Miggins | 21-OSU-04   | 0.00  | 0.00  | 8.89    | Oregon\Swenton (20-01) | 21F16391   | 01  |
| 21F16438     | 24.0 % | Dan Miggins | 21-OSU-04   | 0.00  | 0.00  | 8.89    | Oregon\Swenton (20-01) | 21F16391   | 01  |

| OSU Argon Geochronology Lab<br>CEOAS Oregon State University, Corvallis, USA |        |          |          |            |                 |                  |       |                     |                    |       |            |       |               |      |           |       |              |                        |     |       |      |      |     |        |
|------------------------------------------------------------------------------|--------|----------|----------|------------|-----------------|------------------|-------|---------------------|--------------------|-------|------------|-------|---------------|------|-----------|-------|--------------|------------------------|-----|-------|------|------|-----|--------|
| Sample Parameters                                                            |        | Sample   | Material | Location   | Standard Name   | Standard (in Ma) | %1σ   | Standard Reference  | Standard 40Ar/39Ar | %1σ   | J          | %1σ   | Air 40Ar/36Ar | %1σ  | MDF (lin) | %1σ   | Volume Ratio | Sensitivity (mol/volt) | Day | Month | Year | Hour | Min | Resist |
| 21F16395                                                                     | 24.0 % | VS19-089 | Biotite  | Circle Bar | FCT-NM (4X9-21) | 28.201           | 0.082 | Kuiper et al (2008) | 9.39104            | 0.113 | 0.00165322 | 0.113 | 300.46        | 0.12 | 0.998417  | 0.040 | 1            | 3.54E-14               | 4   | SEP   | 2021 | 0    | 21  | 1      |
| 21F16396                                                                     | 24.0 % | VS19-089 | Biotite  | Circle Bar | FCT-NM (4X9-21) | 28.201           | 0.082 | Kuiper et al (2008) | 9.39104            | 0.113 | 0.00165322 | 0.113 | 300.46        | 0.12 | 0.998417  | 0.040 | 1            | 3.54E-14               | 4   | SEP   | 2021 | 0    | 31  | 1      |
| 21F16398                                                                     | 24.0 % | VS19-089 | Biotite  | Circle Bar | FCT-NM (4X9-21) | 28.201           | 0.082 | Kuiper et al (2008) | 9.39104            | 0.113 | 0.00165322 | 0.113 | 300.46        | 0.12 | 0.998417  | 0.040 | 1            | 3.54E-14               | 4   | SEP   | 2021 | 0    | 51  | 1      |
| 21F16399                                                                     | 24.0 % | VS19-089 | Biotite  | Circle Bar | FCT-NM (4X9-21) | 28.201           | 0.082 | Kuiper et al (2008) | 9.39104            | 0.113 | 0.00165322 | 0.113 | 300.46        | 0.12 | 0.998417  | 0.040 | 1            | 3.54E-14               | 4   | SEP   | 2021 | 1    | 1   | 1      |
| 21F16401                                                                     | 24.0 % | VS19-089 | Biotite  | Circle Bar | FCT-NM (4X9-21) | 28.201           | 0.082 | Kuiper et al (2008) | 9.39104            | 0.113 | 0.00165322 | 0.113 | 300.46        | 0.12 | 0.998417  | 0.040 | 1            | 3.54E-14               | 4   | SEP   | 2021 | 1    | 22  | 1      |
| 21F16402                                                                     | 24.0 % | VS19-089 | Biotite  | Circle Bar | FCT-NM (4X9-21) | 28.201           | 0.082 | Kuiper et al (2008) | 9.39104            | 0.113 | 0.00165322 | 0.113 | 300.46        | 0.12 | 0.998417  | 0.040 | 1            | 3.54E-14               | 4   | SEP   | 2021 | 1    | 32  | 1      |
| 21F16404                                                                     | 24.0 % | VS19-089 | Biotite  | Circle Bar | FCT-NM (4X9-21) | 28.201           | 0.082 | Kuiper et al (2008) | 9.39104            | 0.113 | 0.00165322 | 0.113 | 300.46        | 0.12 | 0.998417  | 0.040 | 1            | 3.54E-14               | 4   | SEP   | 2021 | 1    | 52  | 1      |
| 21F16405                                                                     | 24.0 % | VS19-089 | Biotite  | Circle Bar | FCT-NM (4X9-21) | 28.201           | 0.082 | Kuiper et al (2008) | 9.39104            | 0.113 | 0.00165322 | 0.113 | 300.46        | 0.12 | 0.998417  | 0.040 | 1            | 3.54E-14               | 4   | SEP   | 2021 | 2    | 2   | 1      |
| 21F16407                                                                     | 24.0 % | VS19-089 | Biotite  | Circle Bar | FCT-NM (4X9-21) | 28.201           | 0.082 | Kuiper et al (2008) | 9.39104            | 0.113 | 0.00165322 | 0.113 | 300.46        | 0.12 | 0.998417  | 0.040 | 1            | 3.54E-14               | 4   | SEP   | 2021 | 2    | 21  | 1      |
| 21F16408                                                                     | 24.0 % | VS19-089 | Biotite  | Circle Bar | FCT-NM (4X9-21) | 28.201           | 0.082 | Kuiper et al (2008) | 9.39104            | 0.113 | 0.00165322 | 0.113 | 300.46        | 0.12 | 0.998417  | 0.040 | 1            | 3.54E-14               | 4   | SEP   | 2021 | 2    | 29  | 1      |
| 21F16410                                                                     | 24.0 % | VS19-089 | Biotite  | Circle Bar | FCT-NM (4X9-21) | 28.201           | 0.082 | Kuiper et al (2008) | 9.39104            | 0.113 | 0.00165322 | 0.113 | 300.46        | 0.12 | 0.998417  | 0.040 | 1            | 3.54E-14               | 4   | SEP   | 2021 | 2    | 47  | 1      |
| 21F16411                                                                     | 24.0 % | VS19-089 | Biotite  | Circle Bar | FCT-NM (4X9-21) | 28.201           | 0.082 | Kuiper et al (2008) | 9.39104            | 0.113 | 0.00165322 | 0.113 | 300.46        | 0.12 | 0.998417  | 0.040 | 1            | 3.54E-14               | 4   | SEP   | 2021 | 2    | 55  | 1      |
| 21F16413                                                                     | 24.0 % | VS19-089 | Biotite  | Circle Bar | FCT-NM (4X9-21) | 28.201           | 0.082 | Kuiper et al (2008) | 9.39104            | 0.113 | 0.00165322 | 0.113 | 300.46        | 0.12 | 0.998417  | 0.040 | 1            | 3.54E-14               | 4   | SEP   | 2021 | 3    | 12  | 1      |
| 21F16414                                                                     | 24.0 % | VS19-089 | Biotite  | Circle Bar | FCT-NM (4X9-21) | 28.201           | 0.082 | Kuiper et al (2008) | 9.39104            | 0.113 | 0.00165322 | 0.113 | 300.46        | 0.12 | 0.998417  | 0.040 | 1            | 3.54E-14               | 4   | SEP   | 2021 | 3    | 21  | 1      |
| 21F16416                                                                     | 24.0 % | VS19-089 | Biotite  | Circle Bar | FCT-NM (4X9-21) | 28.201           | 0.082 | Kuiper et al (2008) | 9.39104            | 0.113 | 0.00165322 | 0.113 | 300.46        | 0.12 | 0.998417  | 0.040 | 1            | 3.54E-14               | 4   | SEP   | 2021 | 3    | 38  | 1      |
| 21F16417                                                                     | 24.0 % | VS19-089 | Biotite  | Circle Bar | FCT-NM (4X9-21) | 28.201           | 0.082 | Kuiper et al (2008) | 9.39104            | 0.113 | 0.00165322 | 0.113 | 300.46        | 0.12 | 0.998417  | 0.040 | 1            | 3.54E-14               | 4   | SEP   | 2021 | 3    | 47  | 1      |
| 21F16419                                                                     | 24.0 % | VS19-089 | Biotite  | Circle Bar | FCT-NM (4X9-21) | 28.201           | 0.082 | Kuiper et al (2008) | 9.39104            | 0.113 | 0.00165322 | 0.113 | 300.46        | 0.12 | 0.998417  | 0.040 | 1            | 3.54E-14               | 4   | SEP   | 2021 | 4    | 4   | 1      |
| 21F16420                                                                     | 24.0 % | VS19-089 | Biotite  | Circle Bar | FCT-NM (4X9-21) | 28.201           | 0.082 | Kuiper et al (2008) | 9.39104            | 0.113 | 0.00165322 | 0.113 | 300.46        | 0.12 | 0.998417  | 0.040 | 1            | 3.54E-14               | 4   | SEP   | 2021 | 4    | 13  | 1      |
| 21F16422                                                                     | 24.0 % | VS19-089 | Biotite  | Circle Bar | FCT-NM (4X9-21) | 28.201           | 0.082 | Kuiper et al (2008) | 9.39104            | 0.113 | 0.00165322 | 0.113 | 300.46        | 0.12 | 0.998417  | 0.040 | 1            | 3.54E-14               | 4   | SEP   | 2021 | 4    | 30  | 1      |
| 21F16423                                                                     | 24.0 % | VS19-089 | Biotite  | Circle Bar | FCT-NM (4X9-21) | 28.201           | 0.082 | Kuiper et al (2008) | 9.39104            | 0.113 | 0.00165322 | 0.113 | 300.46        | 0.12 | 0.998417  | 0.040 | 1            | 3.54E-14               | 4   | SEP   | 2021 | 4    | 38  | 1      |
| 21F16425                                                                     | 24.0 % | VS19-089 | Biotite  | Circle Bar | FCT-NM (4X9-21) | 28.201           | 0.082 | Kuiper et al (2008) | 9.39104            | 0.113 | 0.00165322 | 0.113 | 300.46        | 0.12 | 0.998417  | 0.040 | 1            | 3.54E-14               | 4   | SEP   | 2021 | 4    | 56  | 1      |
| 21F16426                                                                     | 24.0 % | VS19-089 | Biotite  | Circle Bar | FCT-NM (4X9-21) | 28.201           | 0.082 | Kuiper et al (2008) | 9.39104            | 0.113 | 0.00165322 | 0.113 | 300.46        | 0.12 | 0.998417  | 0.040 | 1            | 3.54E-14               | 4   | SEP   | 2021 | 5    | 4   | 1      |
| 21F16428                                                                     | 24.0 % | VS19-089 | Biotite  | Circle Bar | FCT-NM (4X9-21) | 28.201           | 0.082 | Kuiper et al (2008) | 9.39104            | 0.113 | 0.00165322 | 0.113 | 300.46        | 0.12 | 0.998417  | 0.040 | 1            | 3.54E-14               | 4   | SEP   | 2021 | 5    | 21  | 1      |
| 21F16429                                                                     | 24.0 % | VS19-089 | Biotite  | Circle Bar | FCT-NM (4X9-21) | 28.201           | 0.082 | Kuiper et al (2008) | 9.39104            | 0.113 | 0.00165322 | 0.113 | 300.46        | 0.12 | 0.998417  | 0.040 | 1            | 3.54E-14               | 4   | SEP   | 2021 | 5    | 30  | 1      |
| 21F16431                                                                     | 24.0 % | VS19-089 | Biotite  | Circle Bar | FCT-NM (4X9-21) | 28.201           | 0.082 | Kuiper et al (2008) | 9.39104            | 0.113 | 0.00165322 | 0.113 | 300.46        | 0.12 | 0.998417  | 0.040 | 1            | 3.54E-14               | 4   | SEP   | 2021 | 5    | 47  | 1      |
| 21F16432                                                                     | 24.0 % | VS19-089 | Biotite  | Circle Bar | FCT-NM (4X9-21) | 28.201           | 0.082 | Kuiper et al (2008) | 9.39104            | 0.113 | 0.00165322 | 0.113 | 300.46        | 0.12 | 0.998417  | 0.040 | 1            | 3.54E-14               | 4   | SEP   | 2021 | 5    | 56  | 1      |
| 21F16434                                                                     | 24.0 % | VS19-089 | Biotite  | Circle Bar | FCT-NM (4X9-21) | 28.201           | 0.082 | Kuiper et al (2008) | 9.39104            | 0.113 | 0.00165322 | 0.113 | 300.46        | 0.12 | 0.998417  | 0.040 | 1            | 3.54E-14               | 4   | SEP   | 2021 | 6    | 13  | 1      |
| 21F16435                                                                     | 24.0 % | VS19-089 | Biotite  | Circle Bar | FCT-NM (4X9-21) | 28.201           | 0.082 | Kuiper et al (2008) | 9.39104            | 0.113 | 0.00165322 | 0.113 | 300.46        | 0.12 | 0.998417  | 0.040 | 1            | 3.54E-14               | 4   | SEP   | 2021 | 6    | 22  | 1      |
| 21F16437                                                                     | 24.0 % | VS19-089 | Biotite  | Circle Bar | FCT-NM (4X9-21) | 28.201           | 0.082 | Kuiper et al (2008) | 9.39104            | 0.113 | 0.00165322 | 0.113 | 300.46        | 0.12 | 0.998417  | 0.040 | 1            | 3.54E-14               | 4   | SEP   | 2021 | 6    | 39  | 1      |
| 21F16438                                                                     | 24.0 % | VS19-089 | Biotite  | Circle Bar | FCT-NM (4X9-21) | 28.201           | 0.082 | Kuiper et al (2008) | 9.39104            | 0.113 | 0.00165322 | 0.113 | 300.46        | 0.12 | 0.998417  | 0.040 | 1            | 3.54E-14               | 4   | SEP   | 2021 | 6    | 47  | 1      |





21F16391.AGE >>> VS19-089 >>> OREGON | SWENTON (20-01) PROJECT

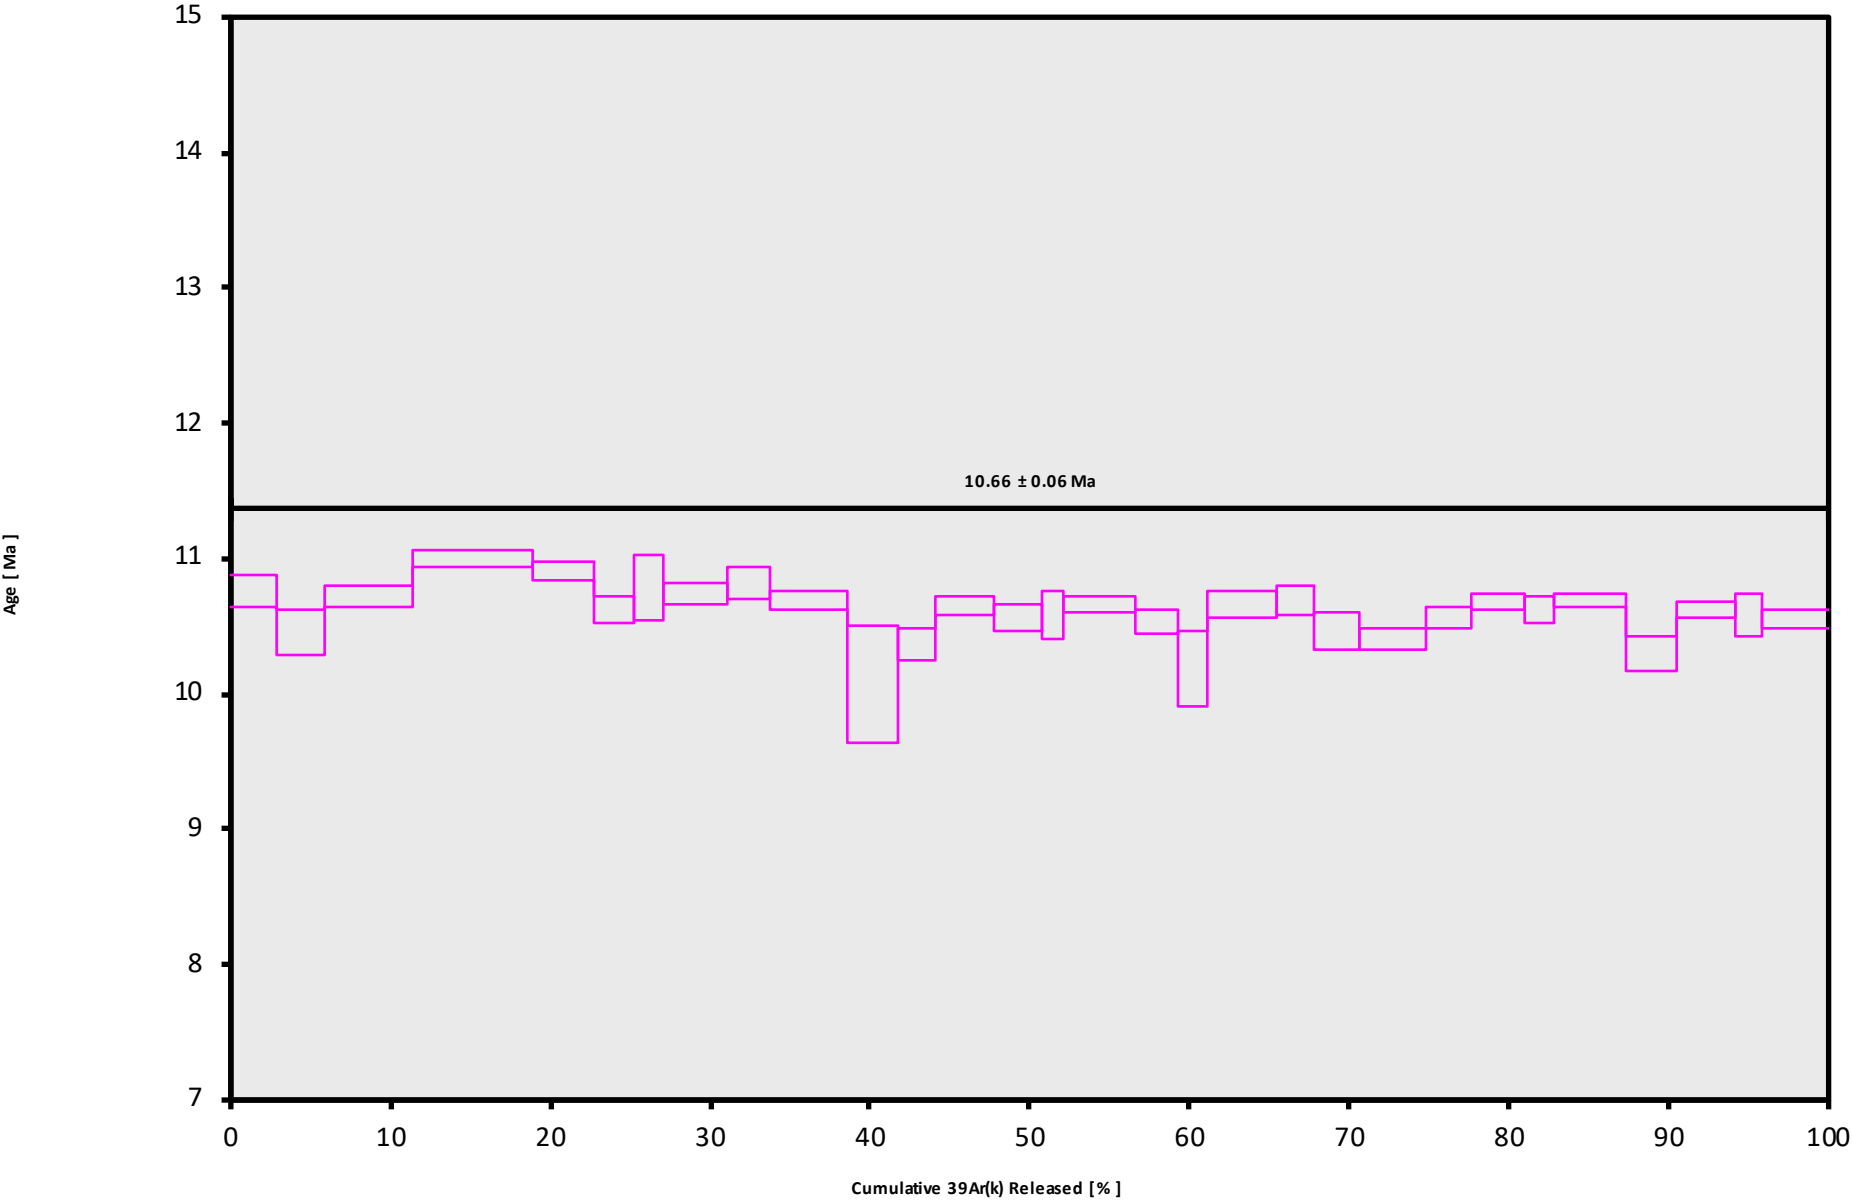

Ar-Ages in Ma

WEIGHTED PLATEAU

10.66  $\pm$  0.06

TOTAL FUSION

10.63  $\pm$  0.03

NORMAL ISOCHRON

10.71  $\pm$  0.10

INVERSE ISOCHRON

10.72  $\pm$  0.10

MSWD (PROBABILITY)

11.81 (0%)

ASSUMED TRAPPED

Sample Info

Biotite

Circle Bar

Dan Miggins

IRR = 21-OSU-04 (4X9-21)

21F16391.AGE >>> VS19-089 >>> OREGON | SWENTON (20-01) PROJECT

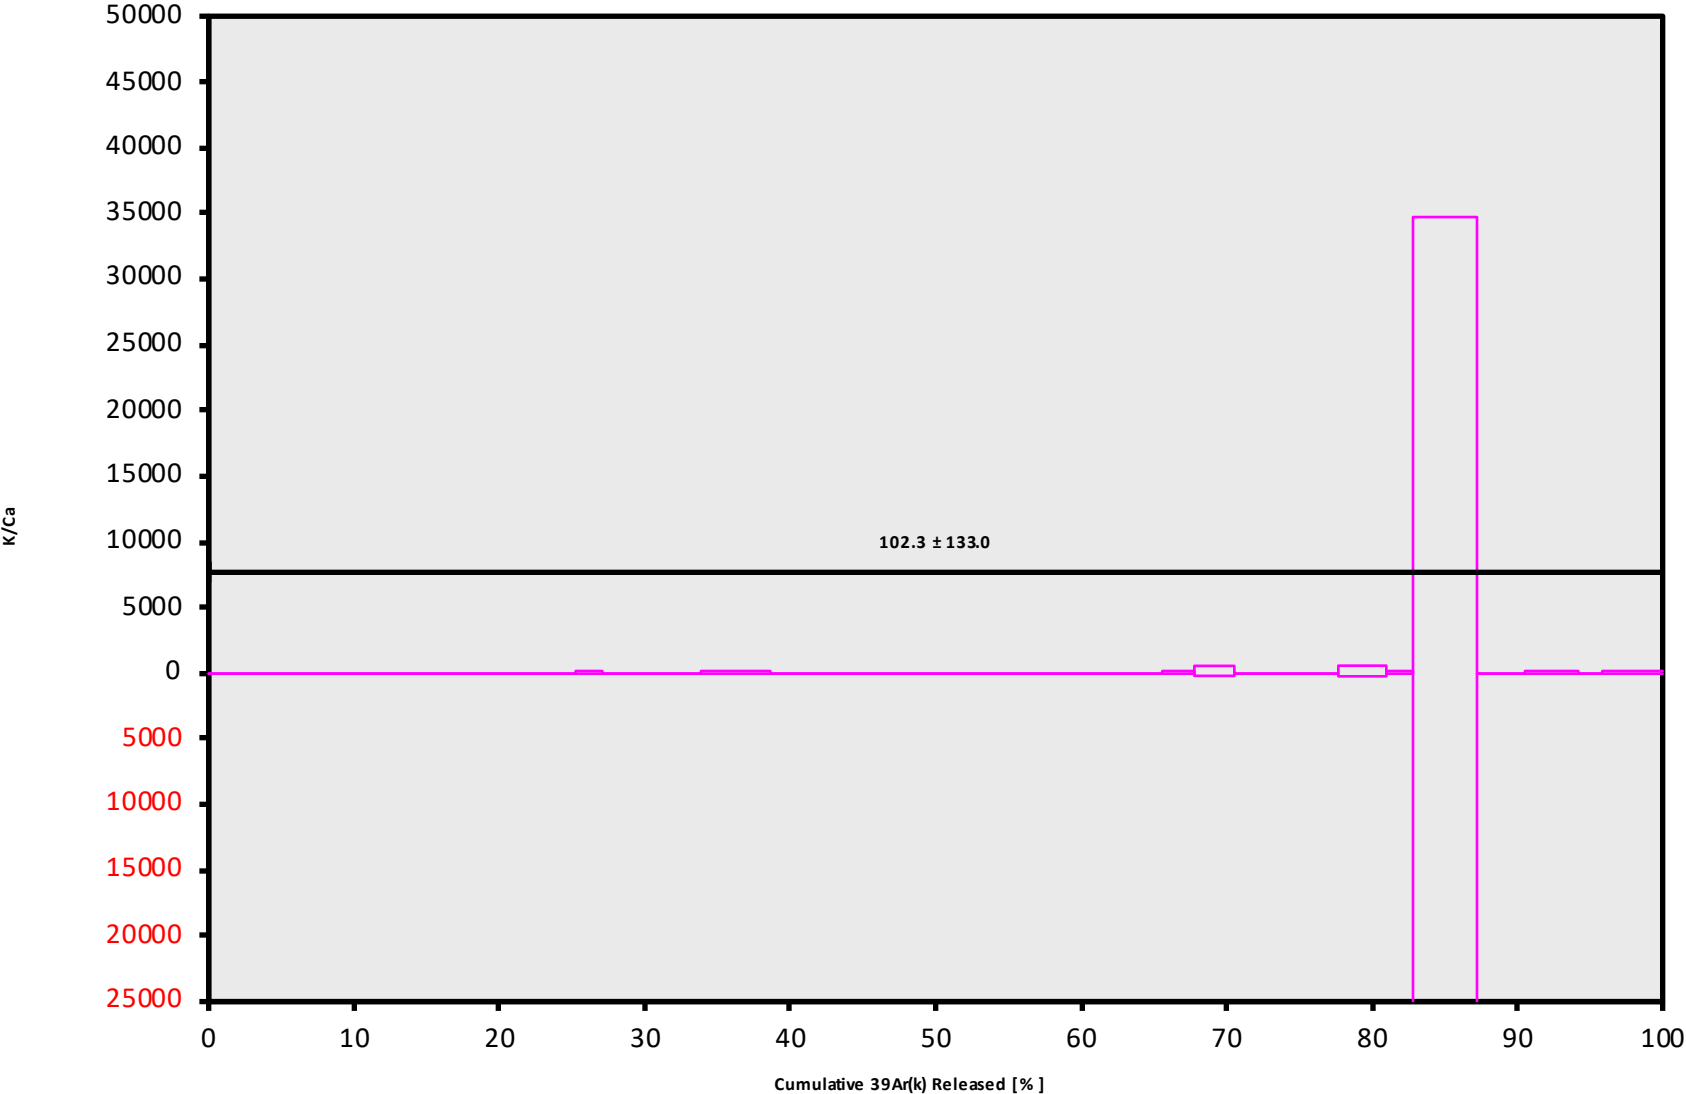

Ar-Ages in Ma

WEIGHTED PLATEAU

10.66 ± 0.06

TOTAL FUSION

10.63 ± 0.03

NORMAL ISOCHRON

10.71 ± 0.10

INVERSE ISOCHRON

10.72 ± 0.10

Sample Info

Biotite

Circle Bar

Dan Miggins

21F16391.AGE >>> VS19-089 >>> OREGON | SWENTON (20-01) PROJECT

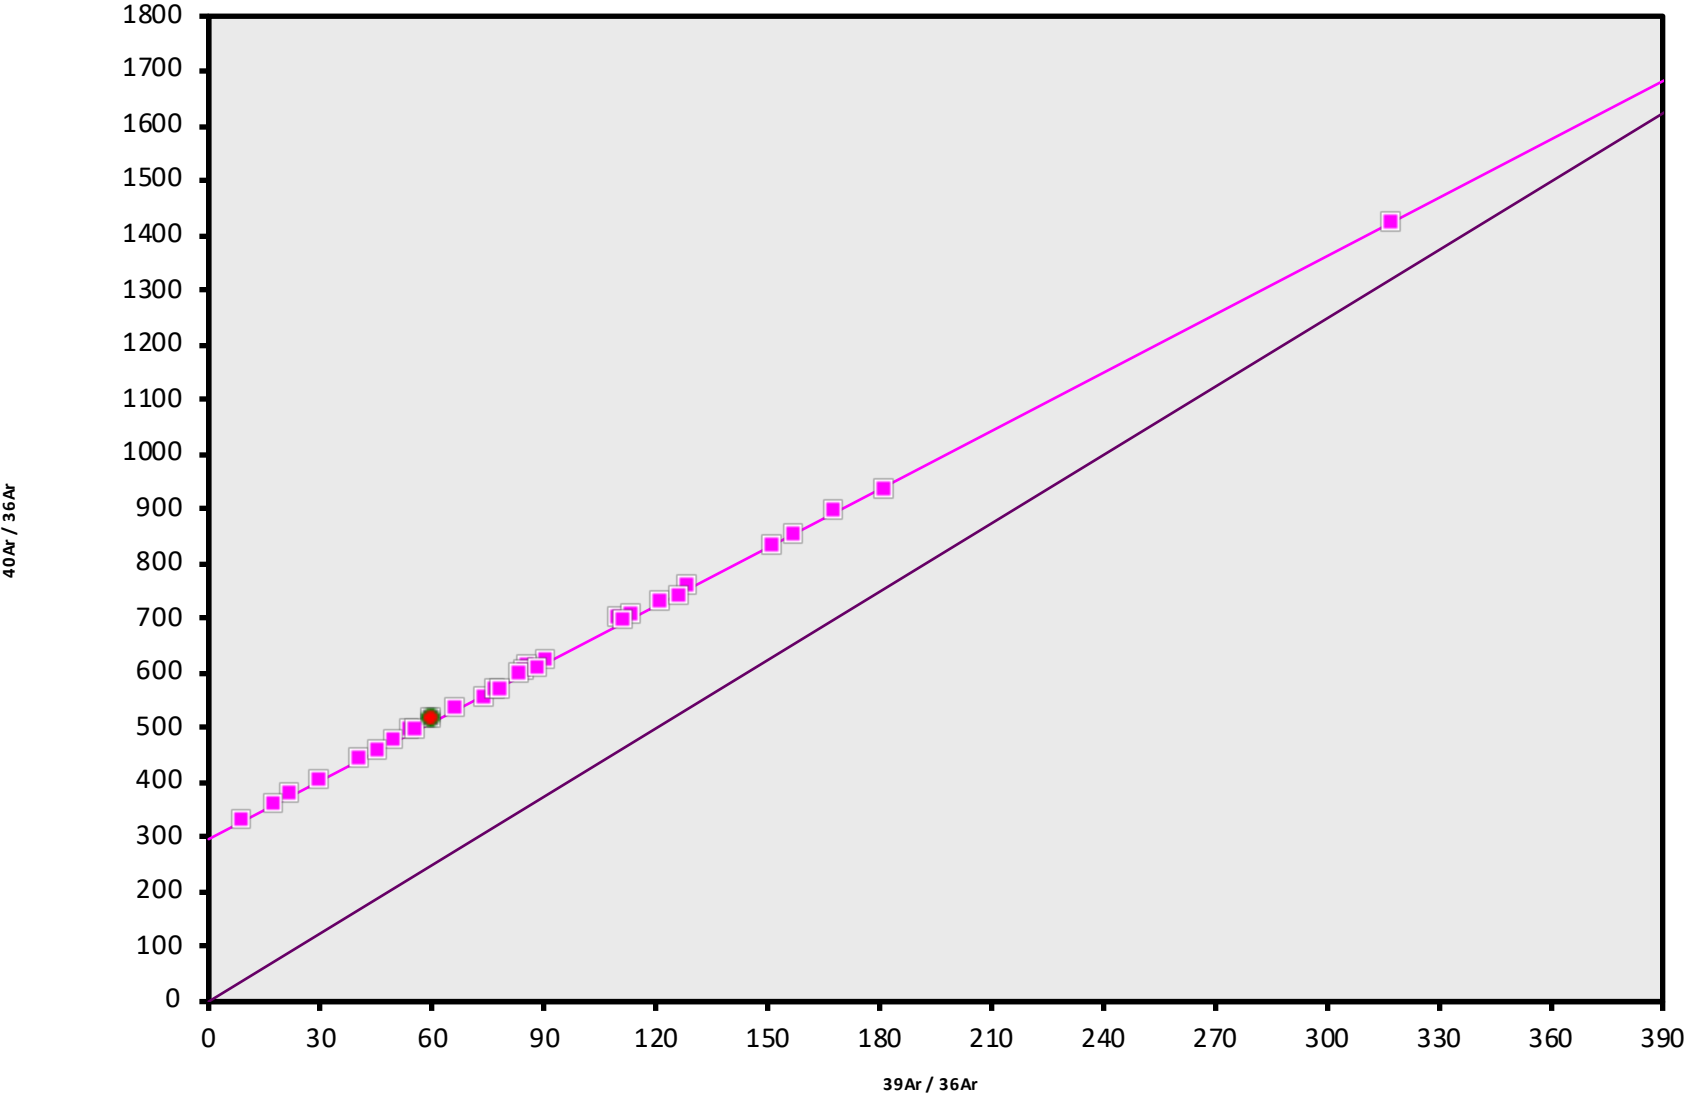

Ar-Ages in Ma

WEIGHTED PLATEAU

$10.66 \pm 0.06$

TOTAL FUSION

$10.63 \pm 0.03$

NORMAL ISOCHRON

$10.71 \pm 0.10$

INVERSE ISOCHRON

$10.72 \pm 0.10$

MSWD (PROBABILITY)

12.33 (0%)

Sample Info

Biotite

Circle Bar

Dan Miggins

21F16391.AGE >>> VS19-089 >>> OREGON | SWENTON (20-01) PROJECT

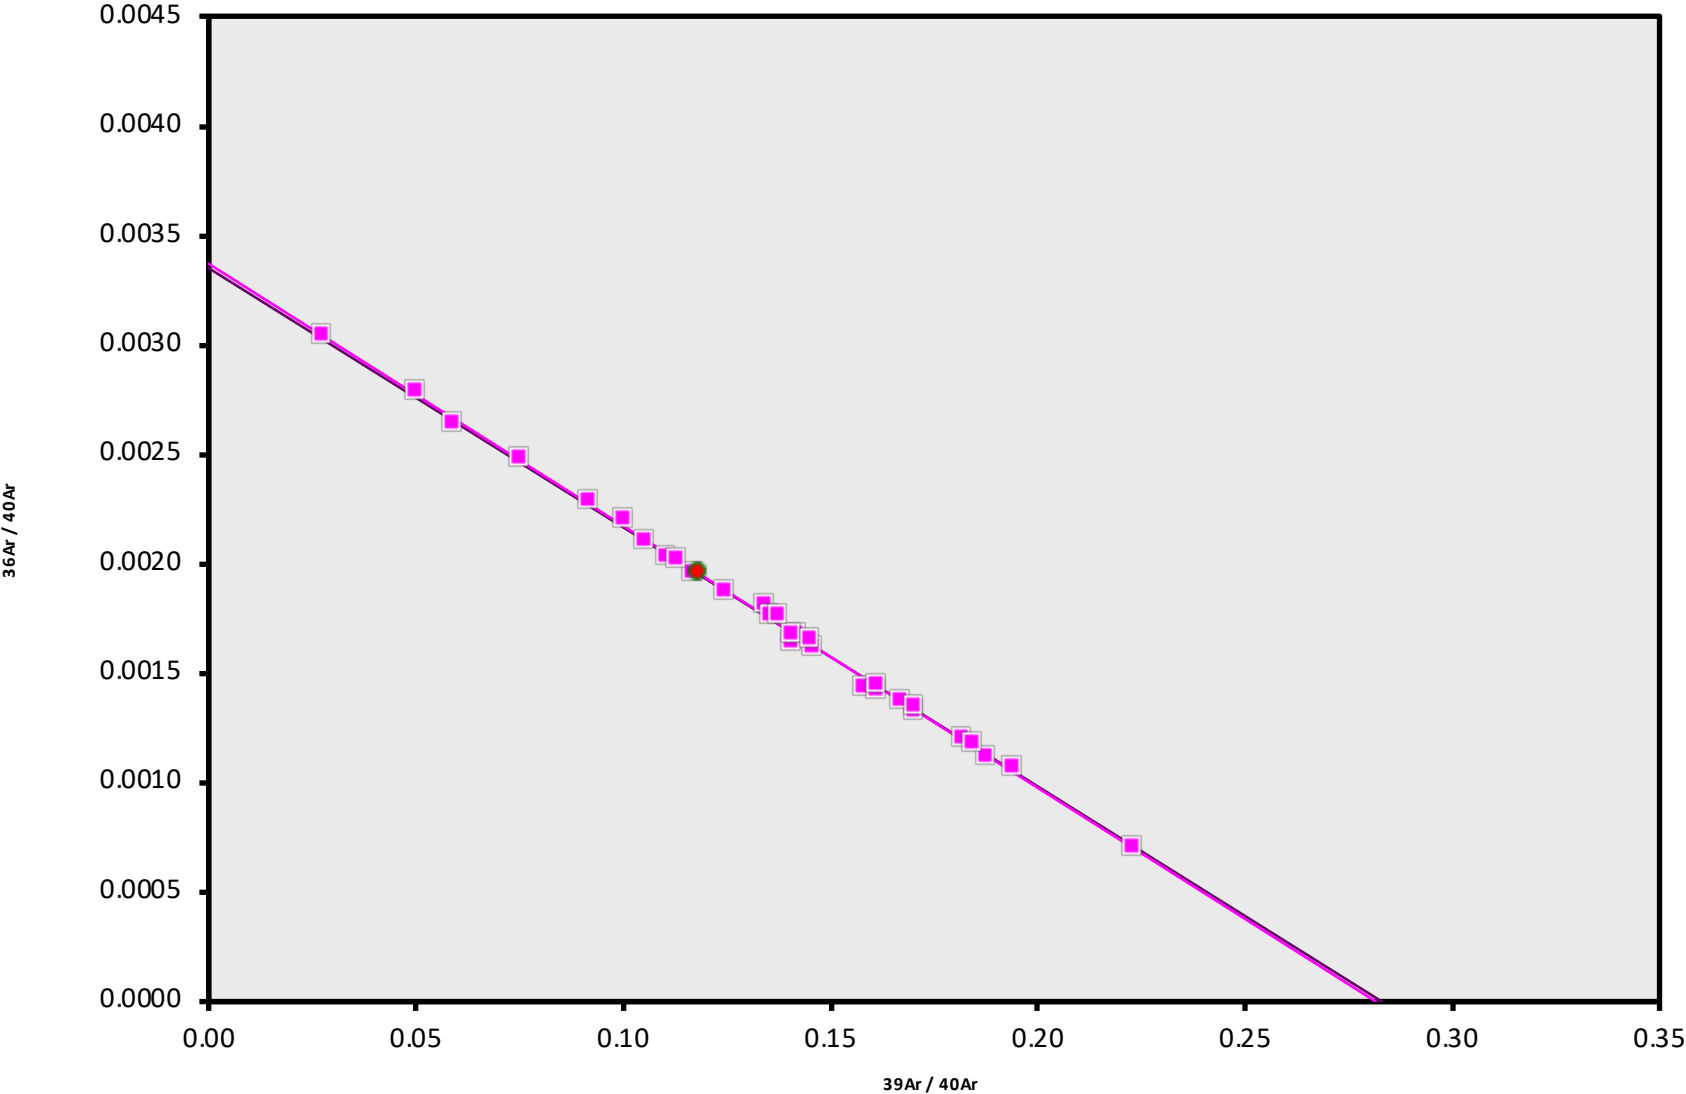

Ar-Ages in Ma

WEIGHTED PLATEAU

$10.66 \pm 0.06$

TOTAL FUSION

$10.63 \pm 0.03$

NORMAL ISOCHRON

$10.71 \pm 0.10$

INVERSE ISOCHRON

$10.72 \pm 0.10$

MSWD (PROBABILITY)

12.58 (0%)

Sample Info

Biotite

Circle Bar

Dan Miggins
